# Supplementary material for: Divergent microbial community and functional dynamics in mangrove sediments along a polycyclic aromatic hydrocarbons (PAHs) gradient in China
Source: Research Square preprint supplement (doi:10.21203/rs.3.rs-7178259/v1), 2025-09-17
Supplement: Supplementary file 1 [file 020f4f41a2fb0ac6c5f484ca.docx]

**Divergent microbial community and functional dynamics in mangrove sediments along a polycyclic aromatic hydrocarbons (PAHs) gradient in China**

Danyun Ou1,2,3,4*, Yue Ni1,2,3, Weiyi He1,5, Shuangshuang Lin1,2,3, Weiwen Li1,2,3, Lei Wang1,2,3, Hao Huang1,2,3, Shangwei Wang1,2,3, Shunyang Chen1,2,3,4, Jiahui Chen1,2,3,4, Guancheng Chen1,2,3,4

1Third Institute of Oceanography, Ministry of Natural Resources, Xiamen 361005, P.R. China

2Key Laboratory of Marine Ecological Conservation and Restoration, Ministry of Natural Resources, Xiamen 361005, P. R. China

3Fujian Provincial Key Laboratory of Marine Ecological Conservation and Restoration, Xiamen 361005, P. R. China

4Observation and Research Station of Coastal Wetland Ecosystem in Beibu Gulf, Ministry of Natural Resources, Beihai 536015, P. R. China

5Institute for Advanced Studies, Universiti Malaya, 50603 Kuala Lumpur, Federal Territory of Kuala Lumpur, Malysia


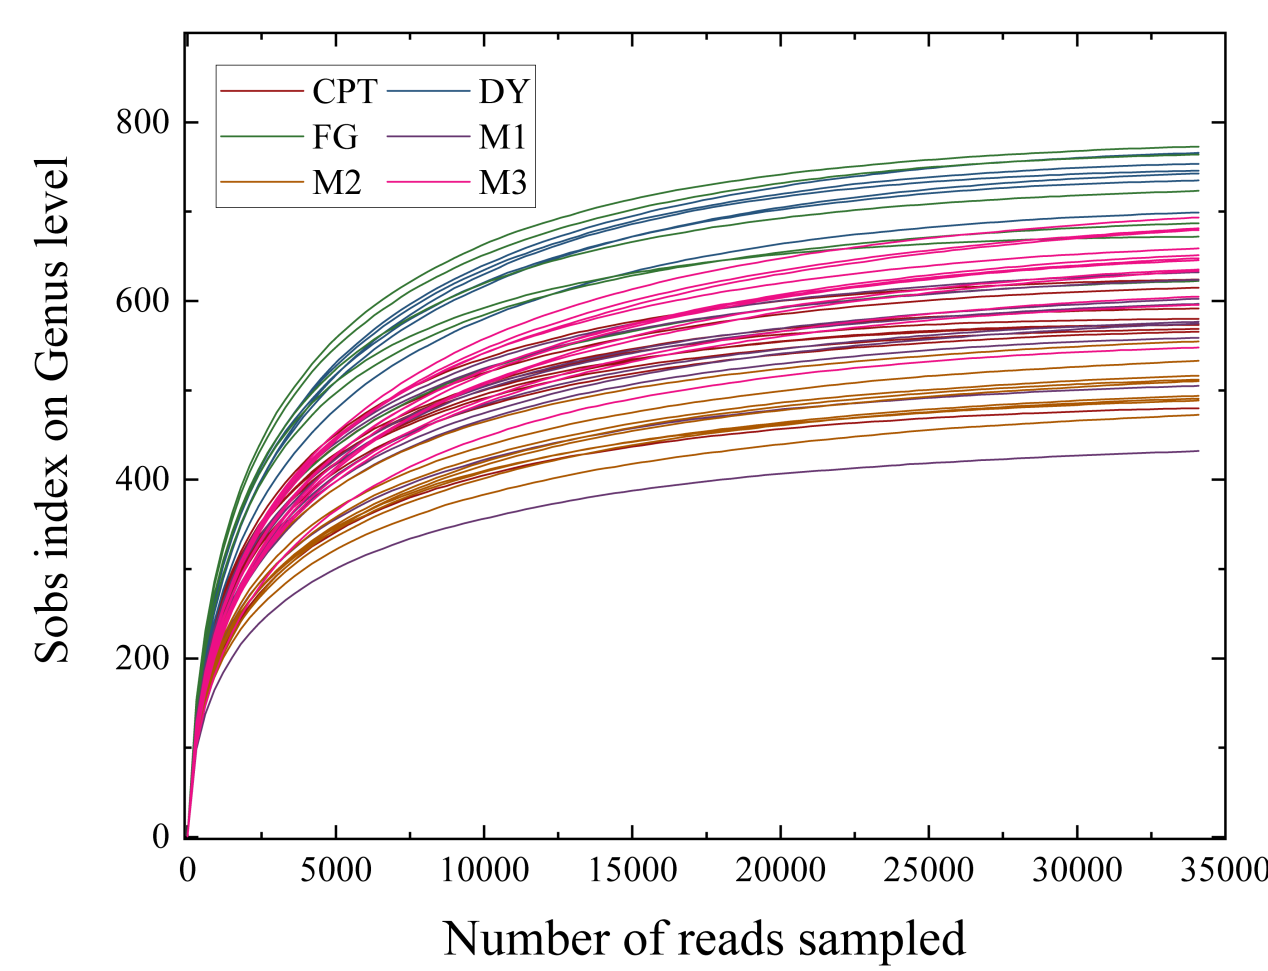


Figure S1. Rarefaction curves comparing the number of flattened 16S rRNA gene sequences with the number of observed bacterial genus in each sample


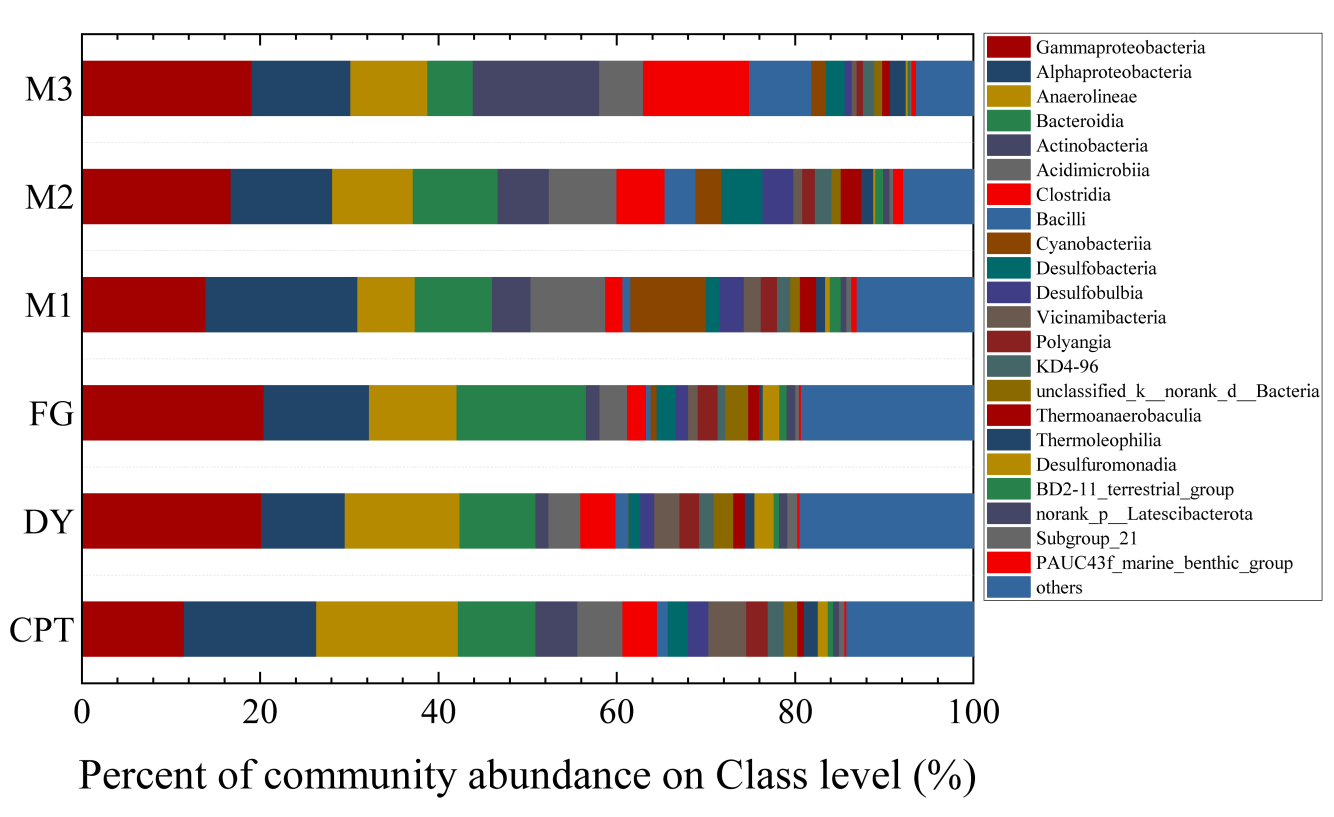


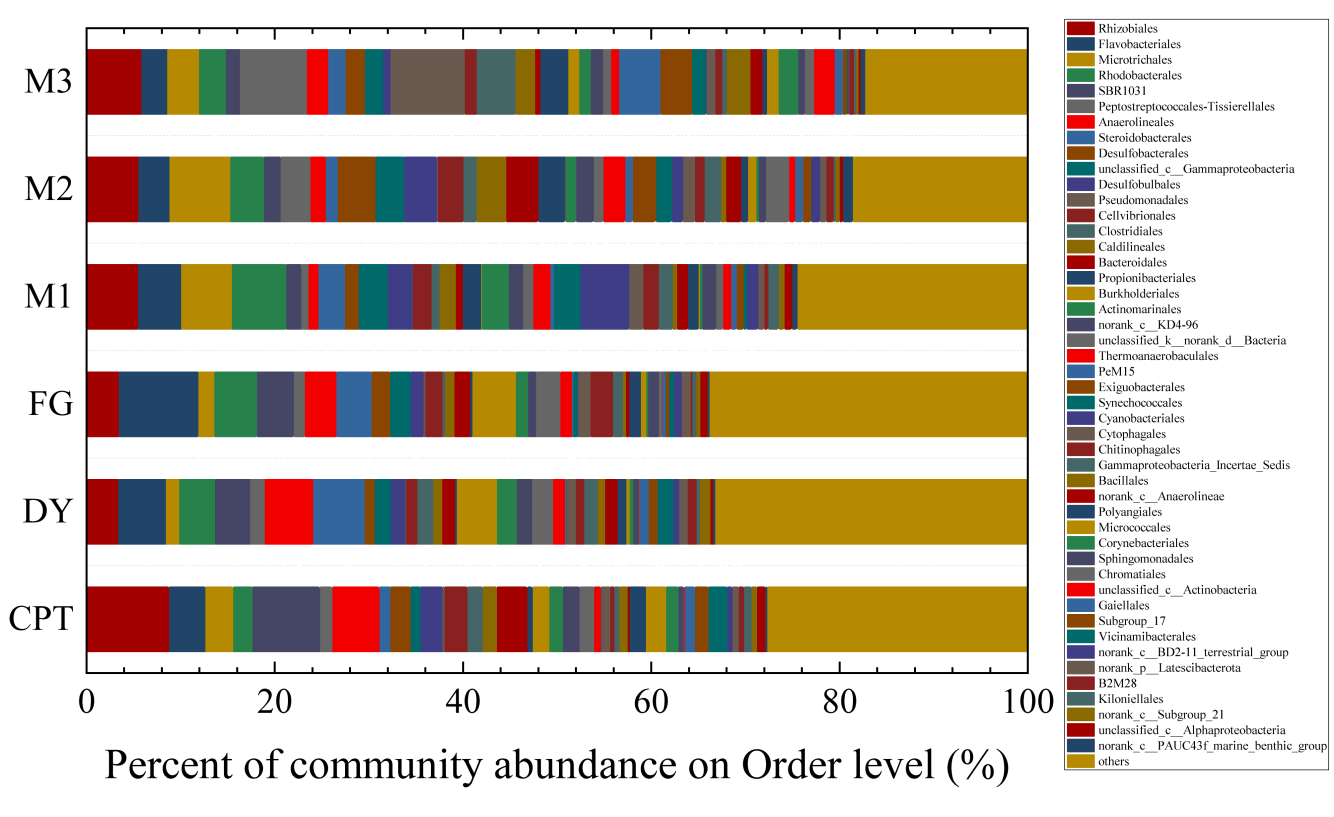


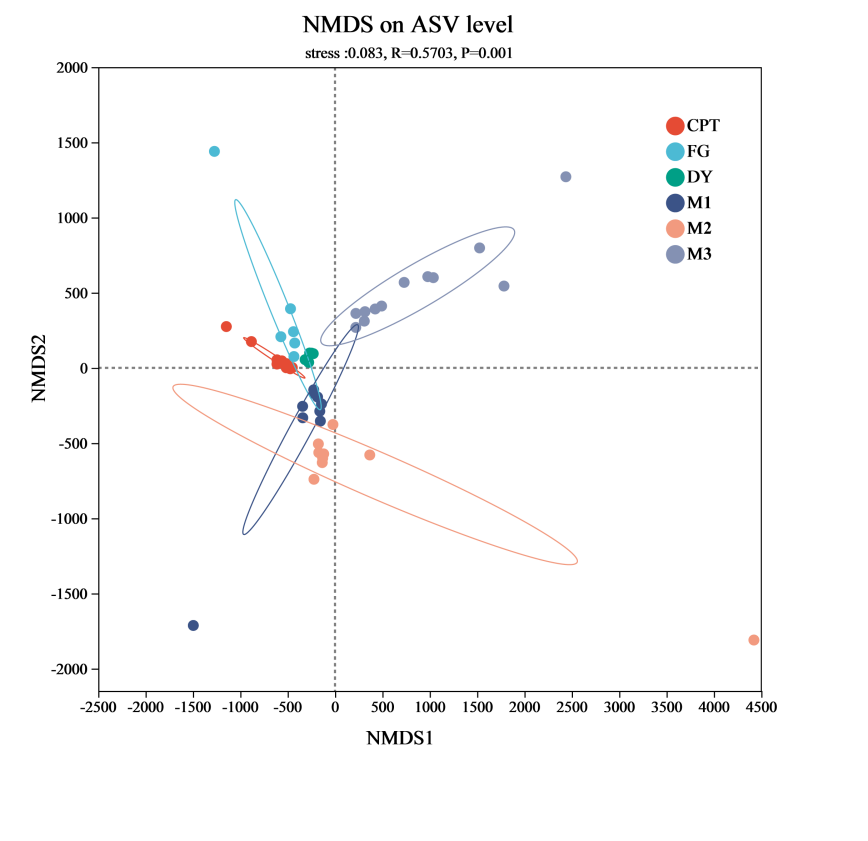


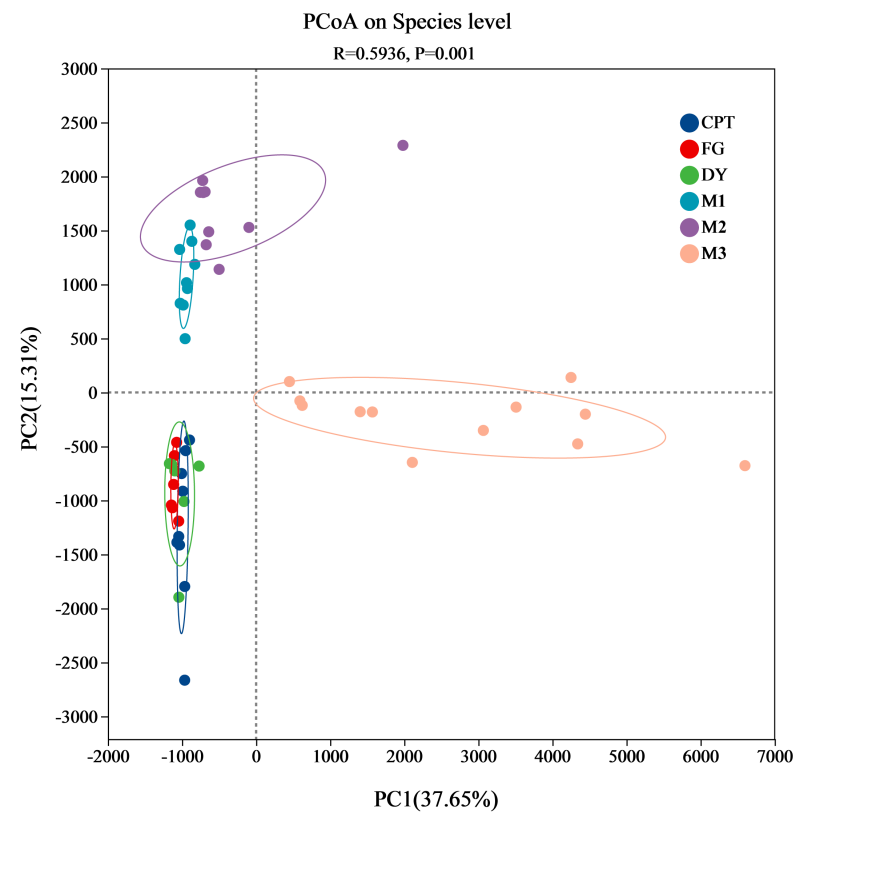


Figure S2 Distinct bacterial community structures in mangrove sediments across sampling sections with varying PAH contamination levels, as revealed by 16S rRNA gene sequencing. (a), Percentage of bacterial communities at the class level. (b), Percentage of bacterial communities at the order level. (b), Non-metric multidimensional scaling (NMDs) ordination showing microbial community clustering across sampling sections. (c), Principal Coordinate Analysis (PCoA) based on Bray-Curtis dissimilarity revealing divergence of microbial community in M3 compared to other sections.


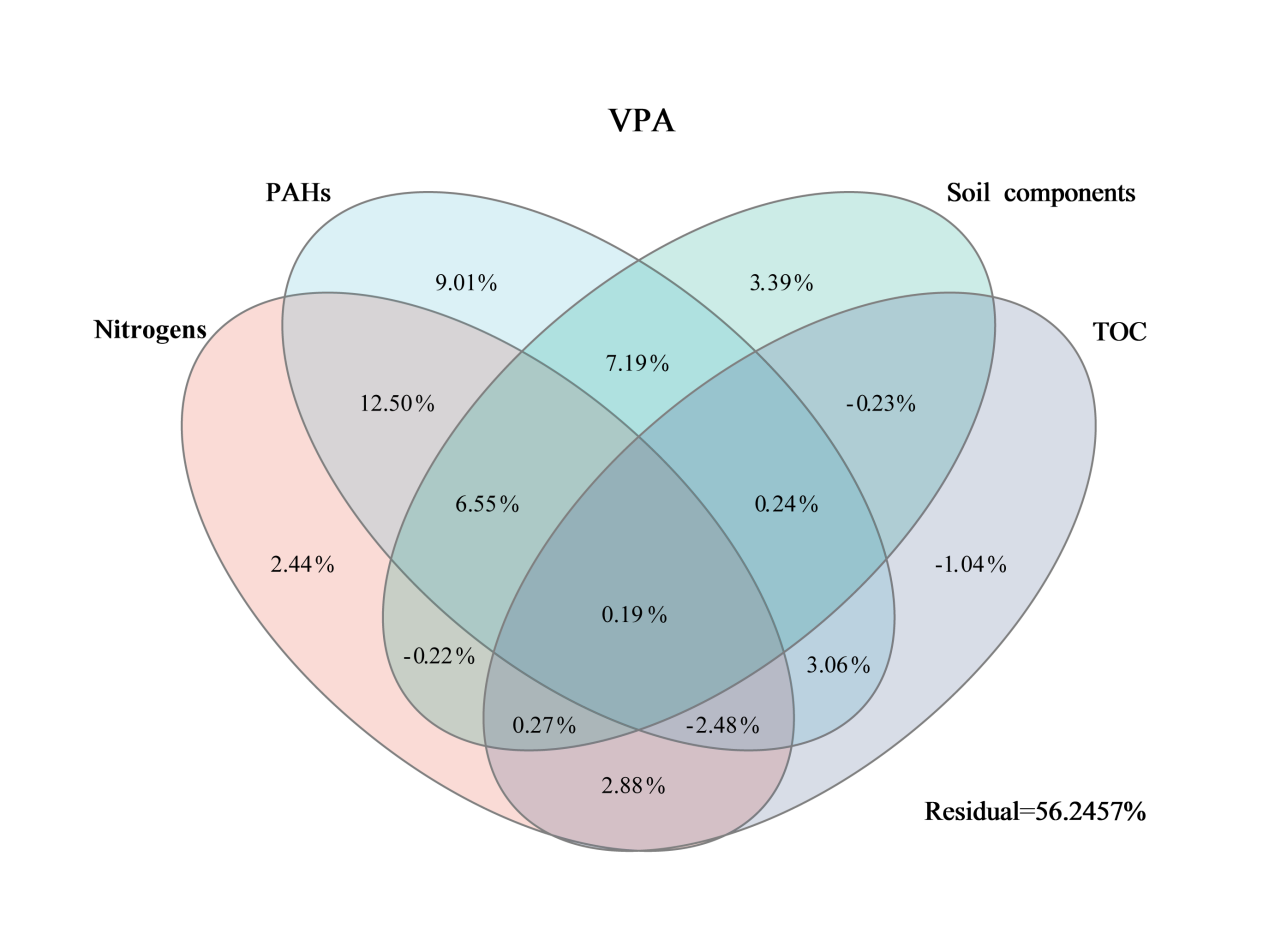


Figure S3 Variance partitioning analysis (VPA) of microbial community influenced by PAH concentration, nitrogen content, total organic carbon (TOC), and soil components.


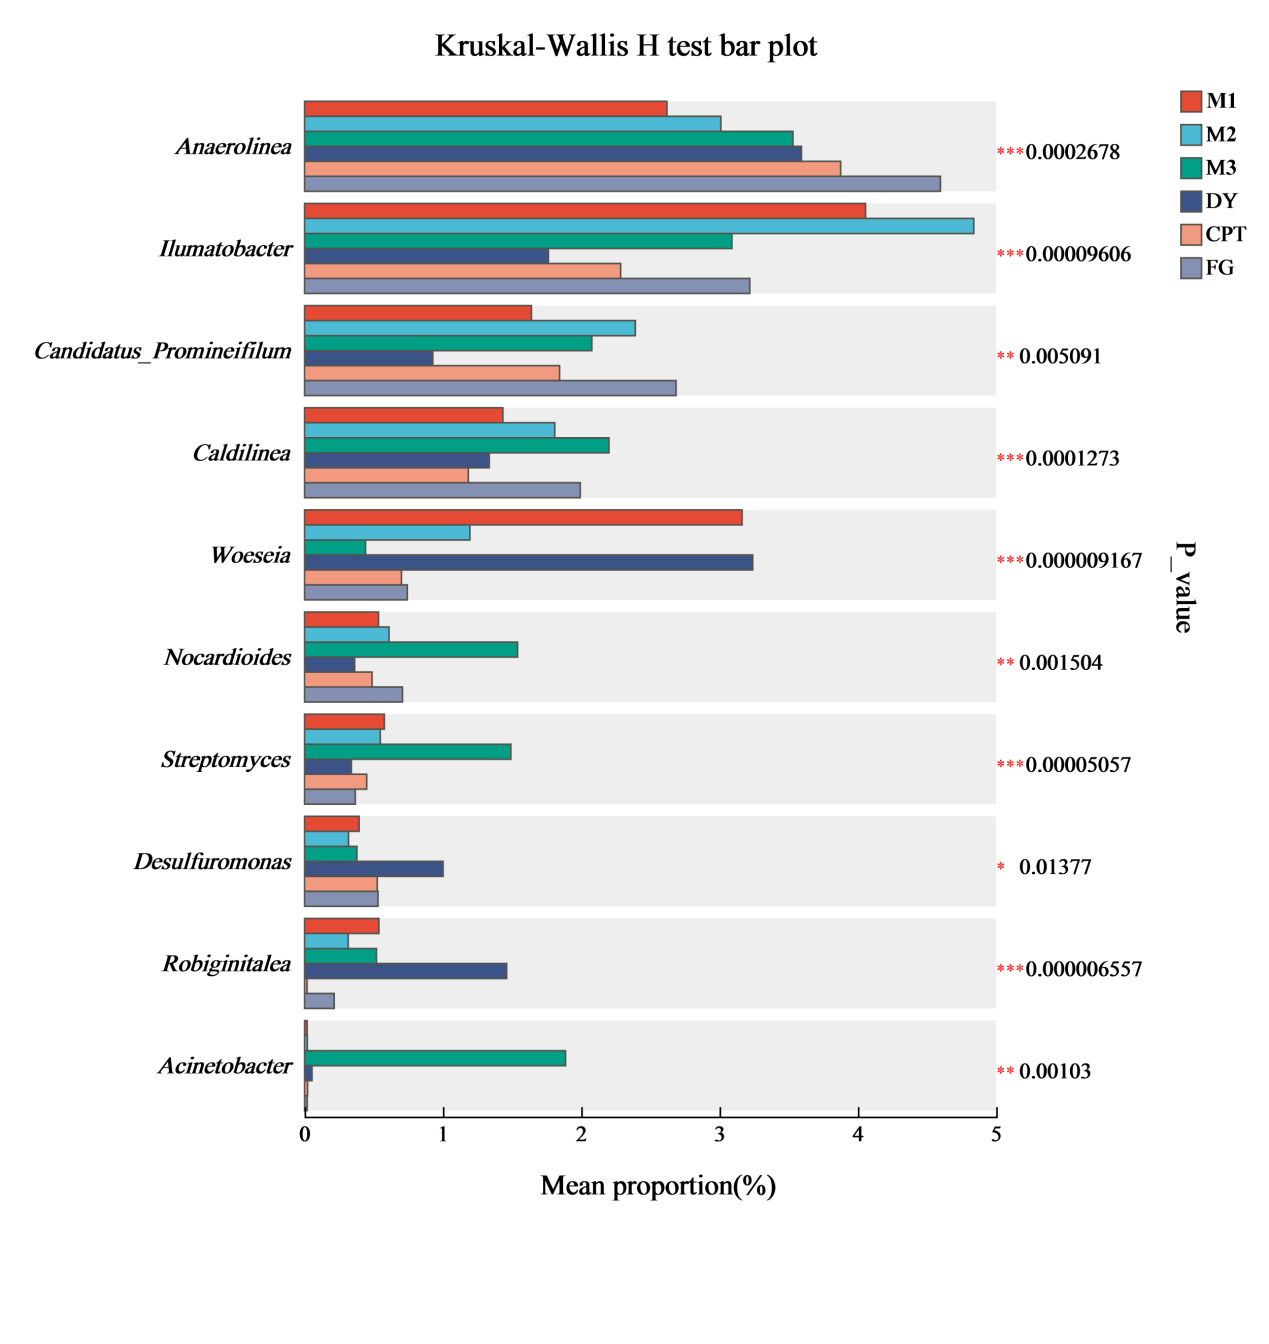


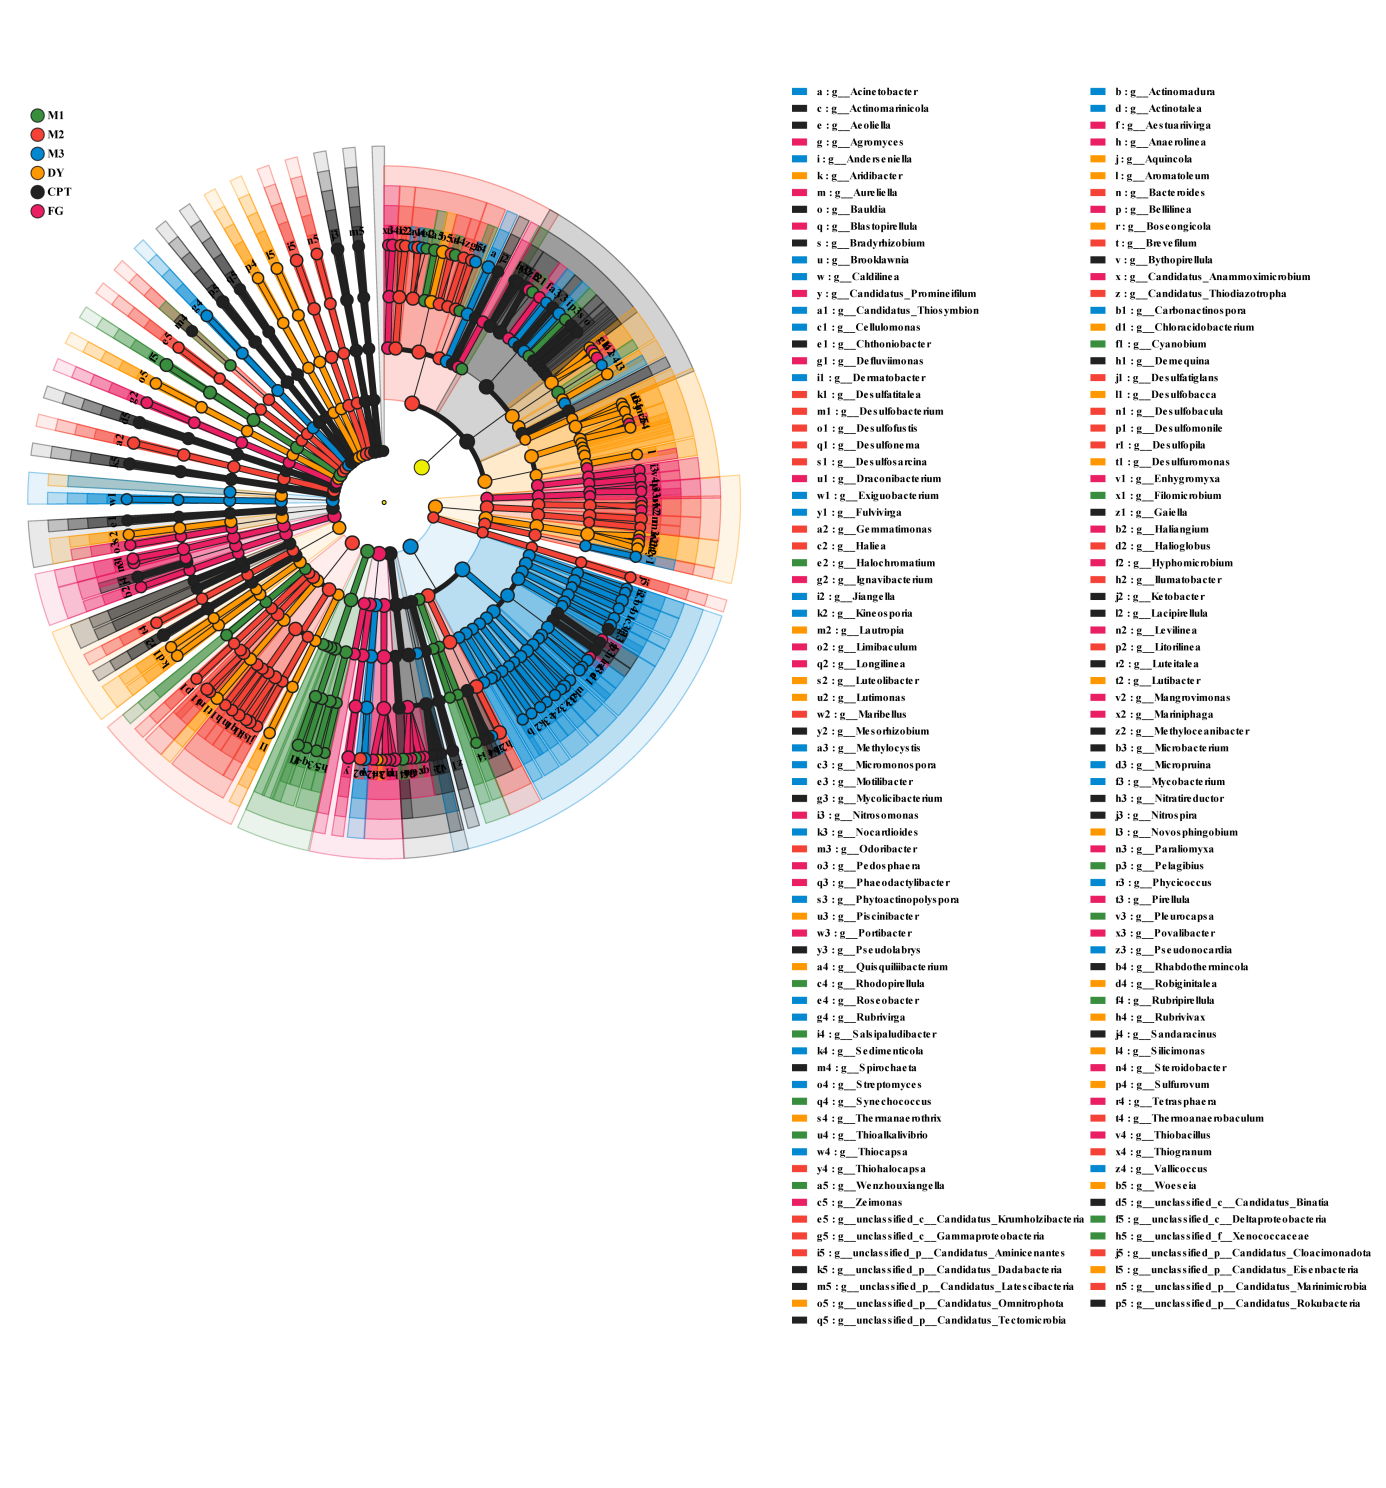


Figure S4 Metagenomic analysis revealed distinct bacterial community structures in mangrove sediments across sampling sections. (a), Differential abundance of dominant bacterial genera among sampling sections (Kruskal-Wallis test, *p* < 0.05). (b), LEfSe analysis identifying taxa with significant differences (Wilcoxon rank-sum test, *p* < 0.05, LDA > 3). The phylogenetic hierarchy (phylum to genus) is represented by concentric circles, with circle size scaled to taxon abundance. Colored nodes denote taxa significantly enriched in specific sampling sections, non-differentially abundant taxa are uniformly colored in yellow.


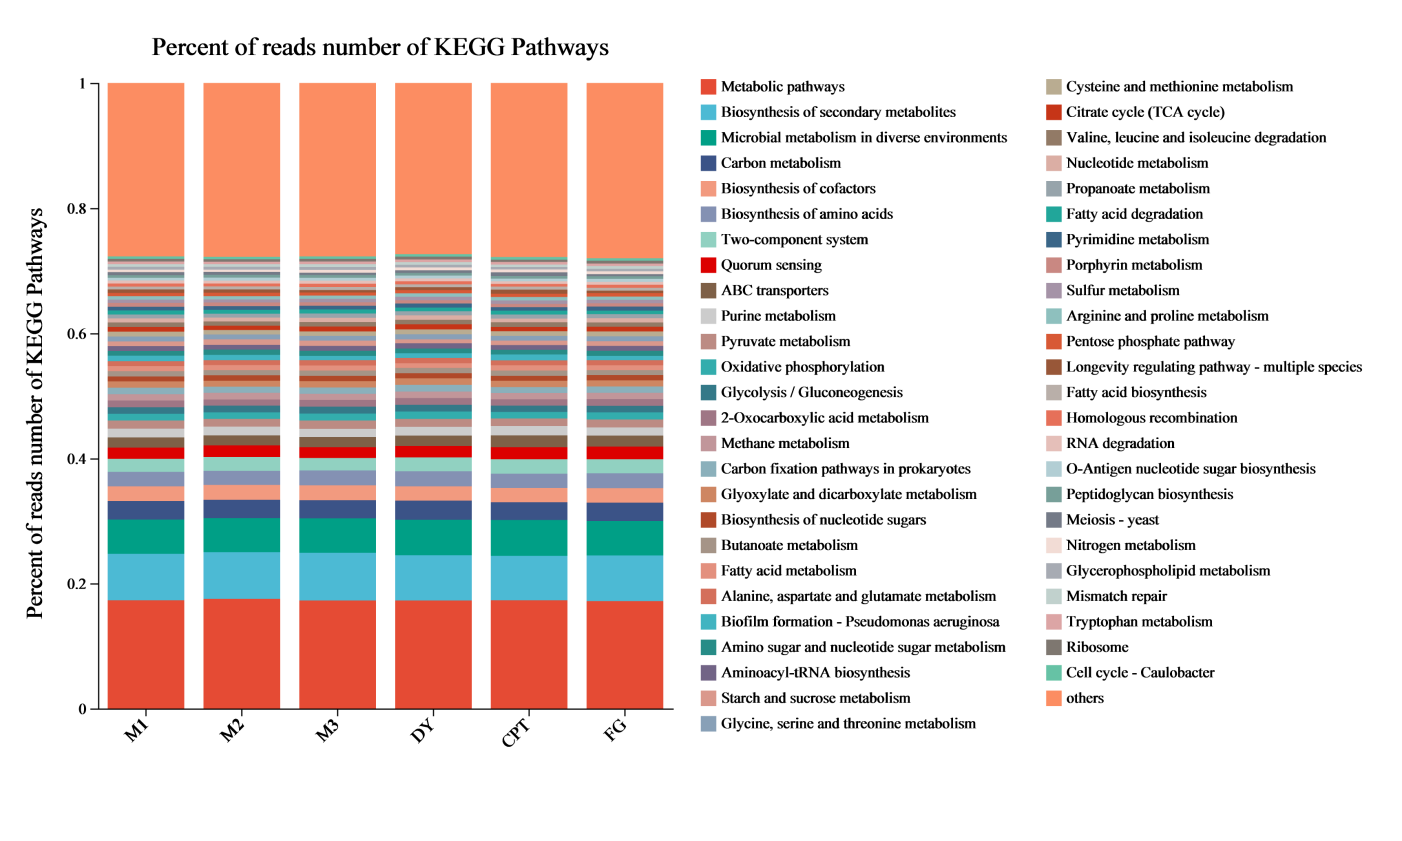

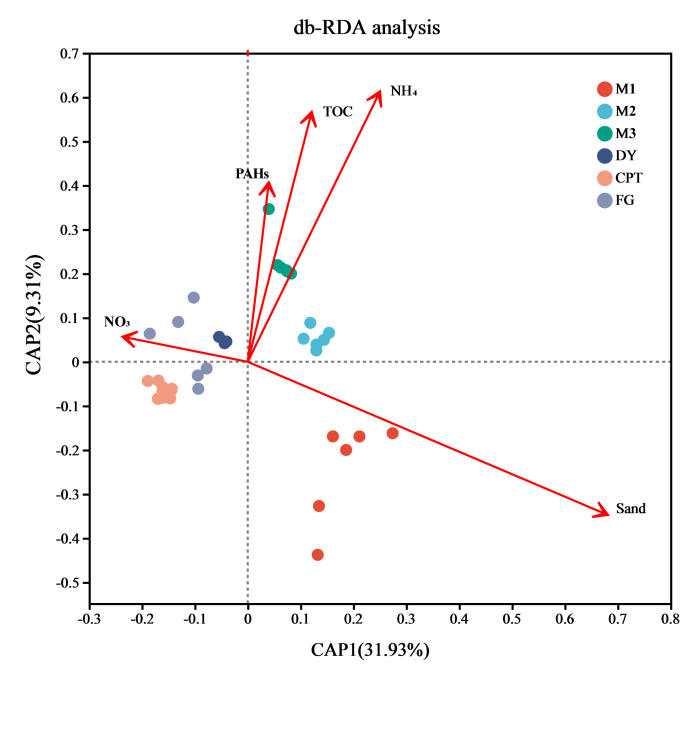

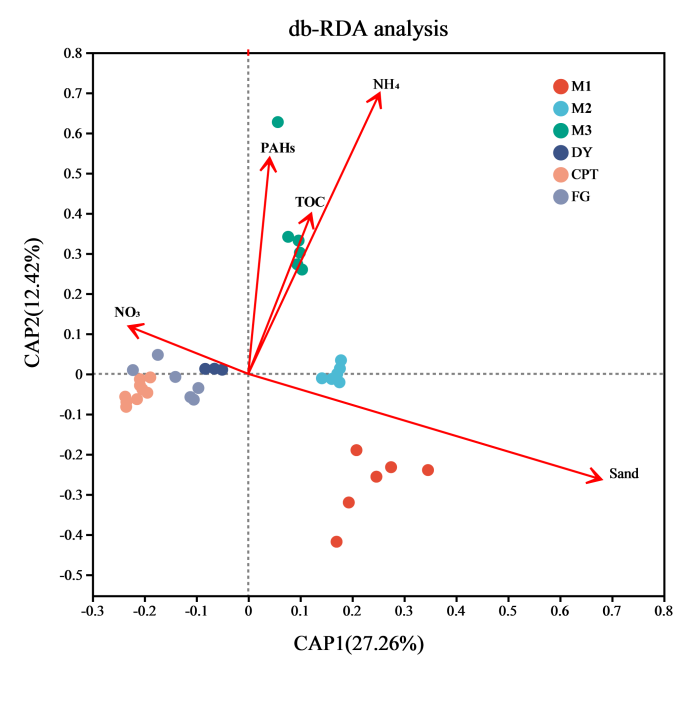


Figure S5 Functional variation in mangrove sediment microbial communities and their environmental drivers. (a), Abundance of KEGG pathways (level 3) across sampling sections.(b-c), distance-based redundancy analysis (db-RDA) showing spatial clustering of KEGG enzymes (b) and KOs (c) by sampling section, with environmental factor vector indicated.


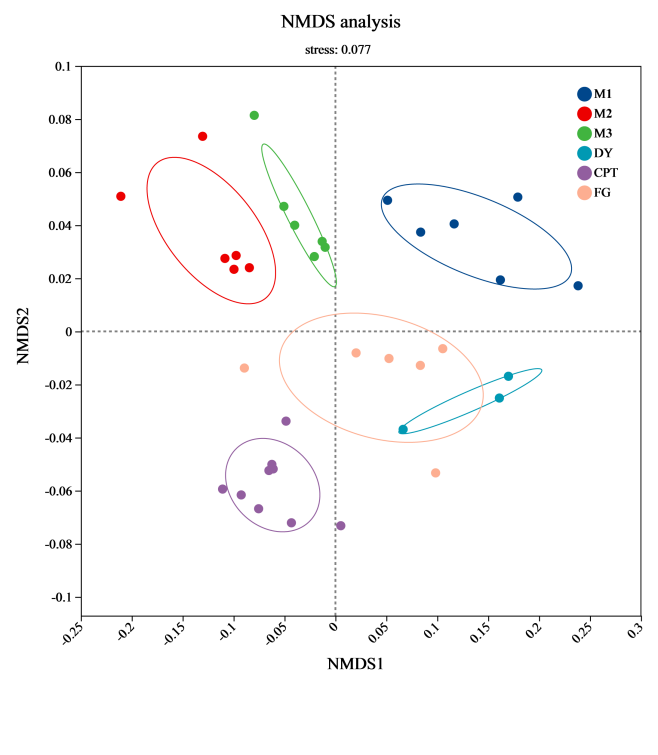

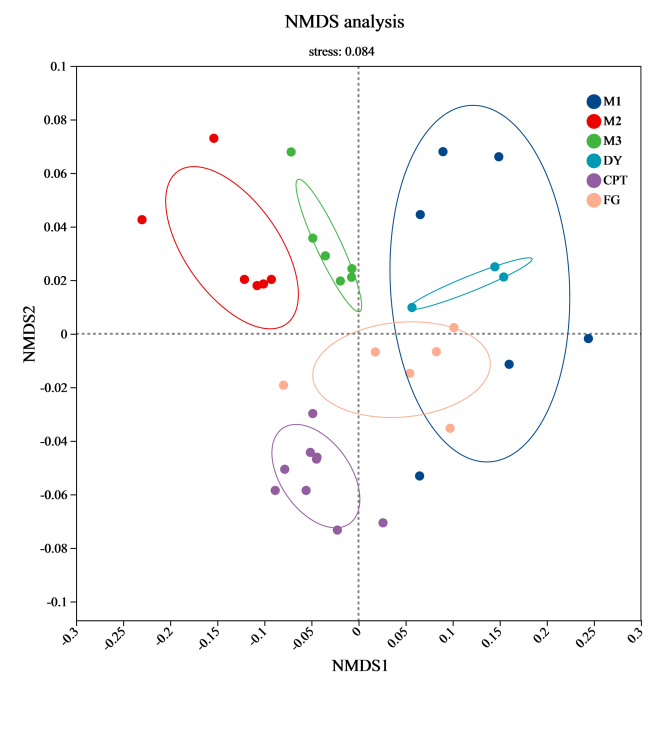

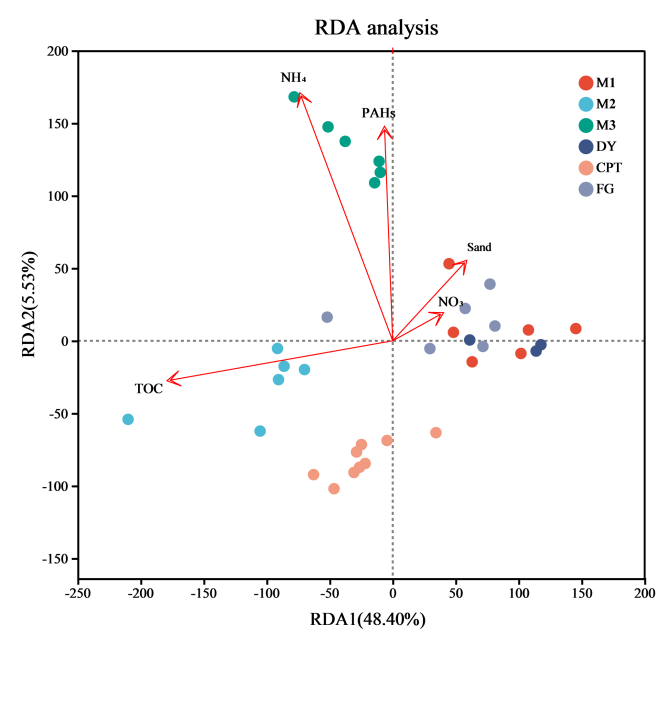

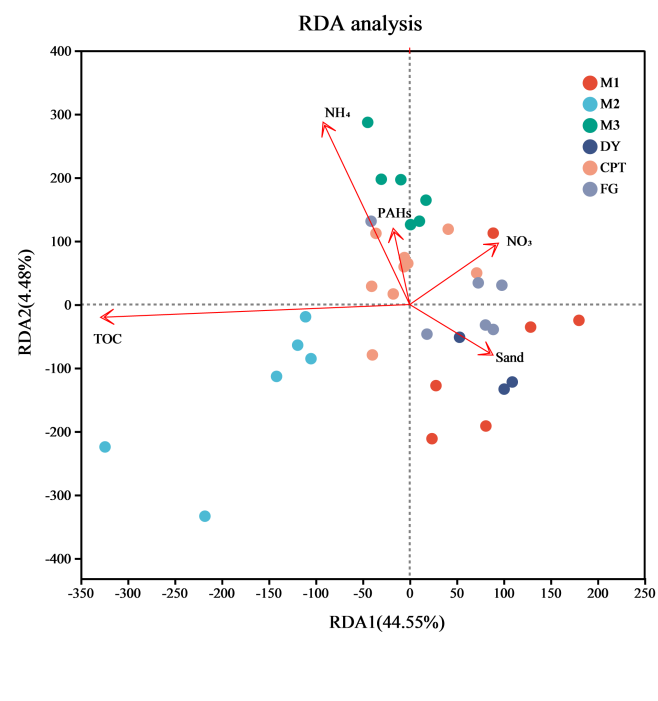

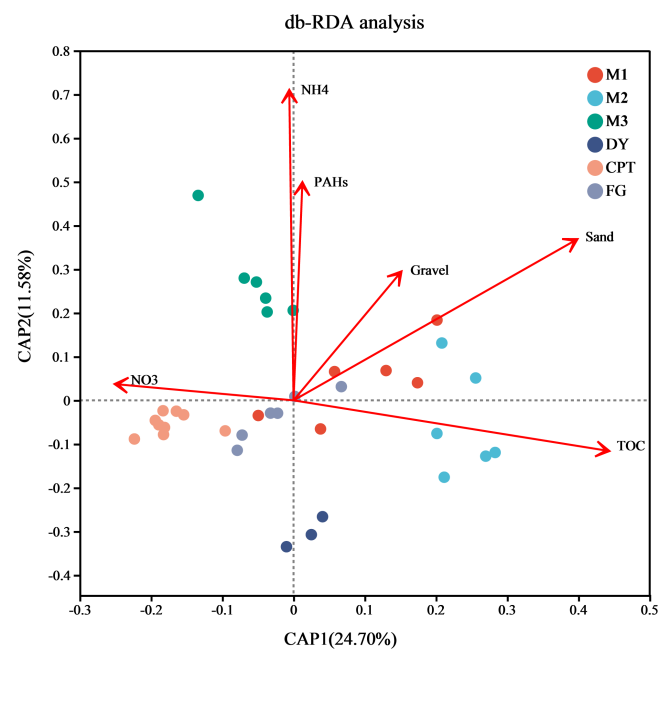


Figure S6 Distribution pattern of microbial PAH-degrading potential across sampling sections and their environmental determinants (VIF < 10). (a-b), NMDs ordination showing significant biogeographic variation in PAH-degrading KOs (a) and enzymes (b). (c-e), db-RDA results identifying PAH and ammonia as primary drivers of spatial distribution for PAH-degrading KOs (c), enzymes (d), and oxidoreductases (e) in section M3.


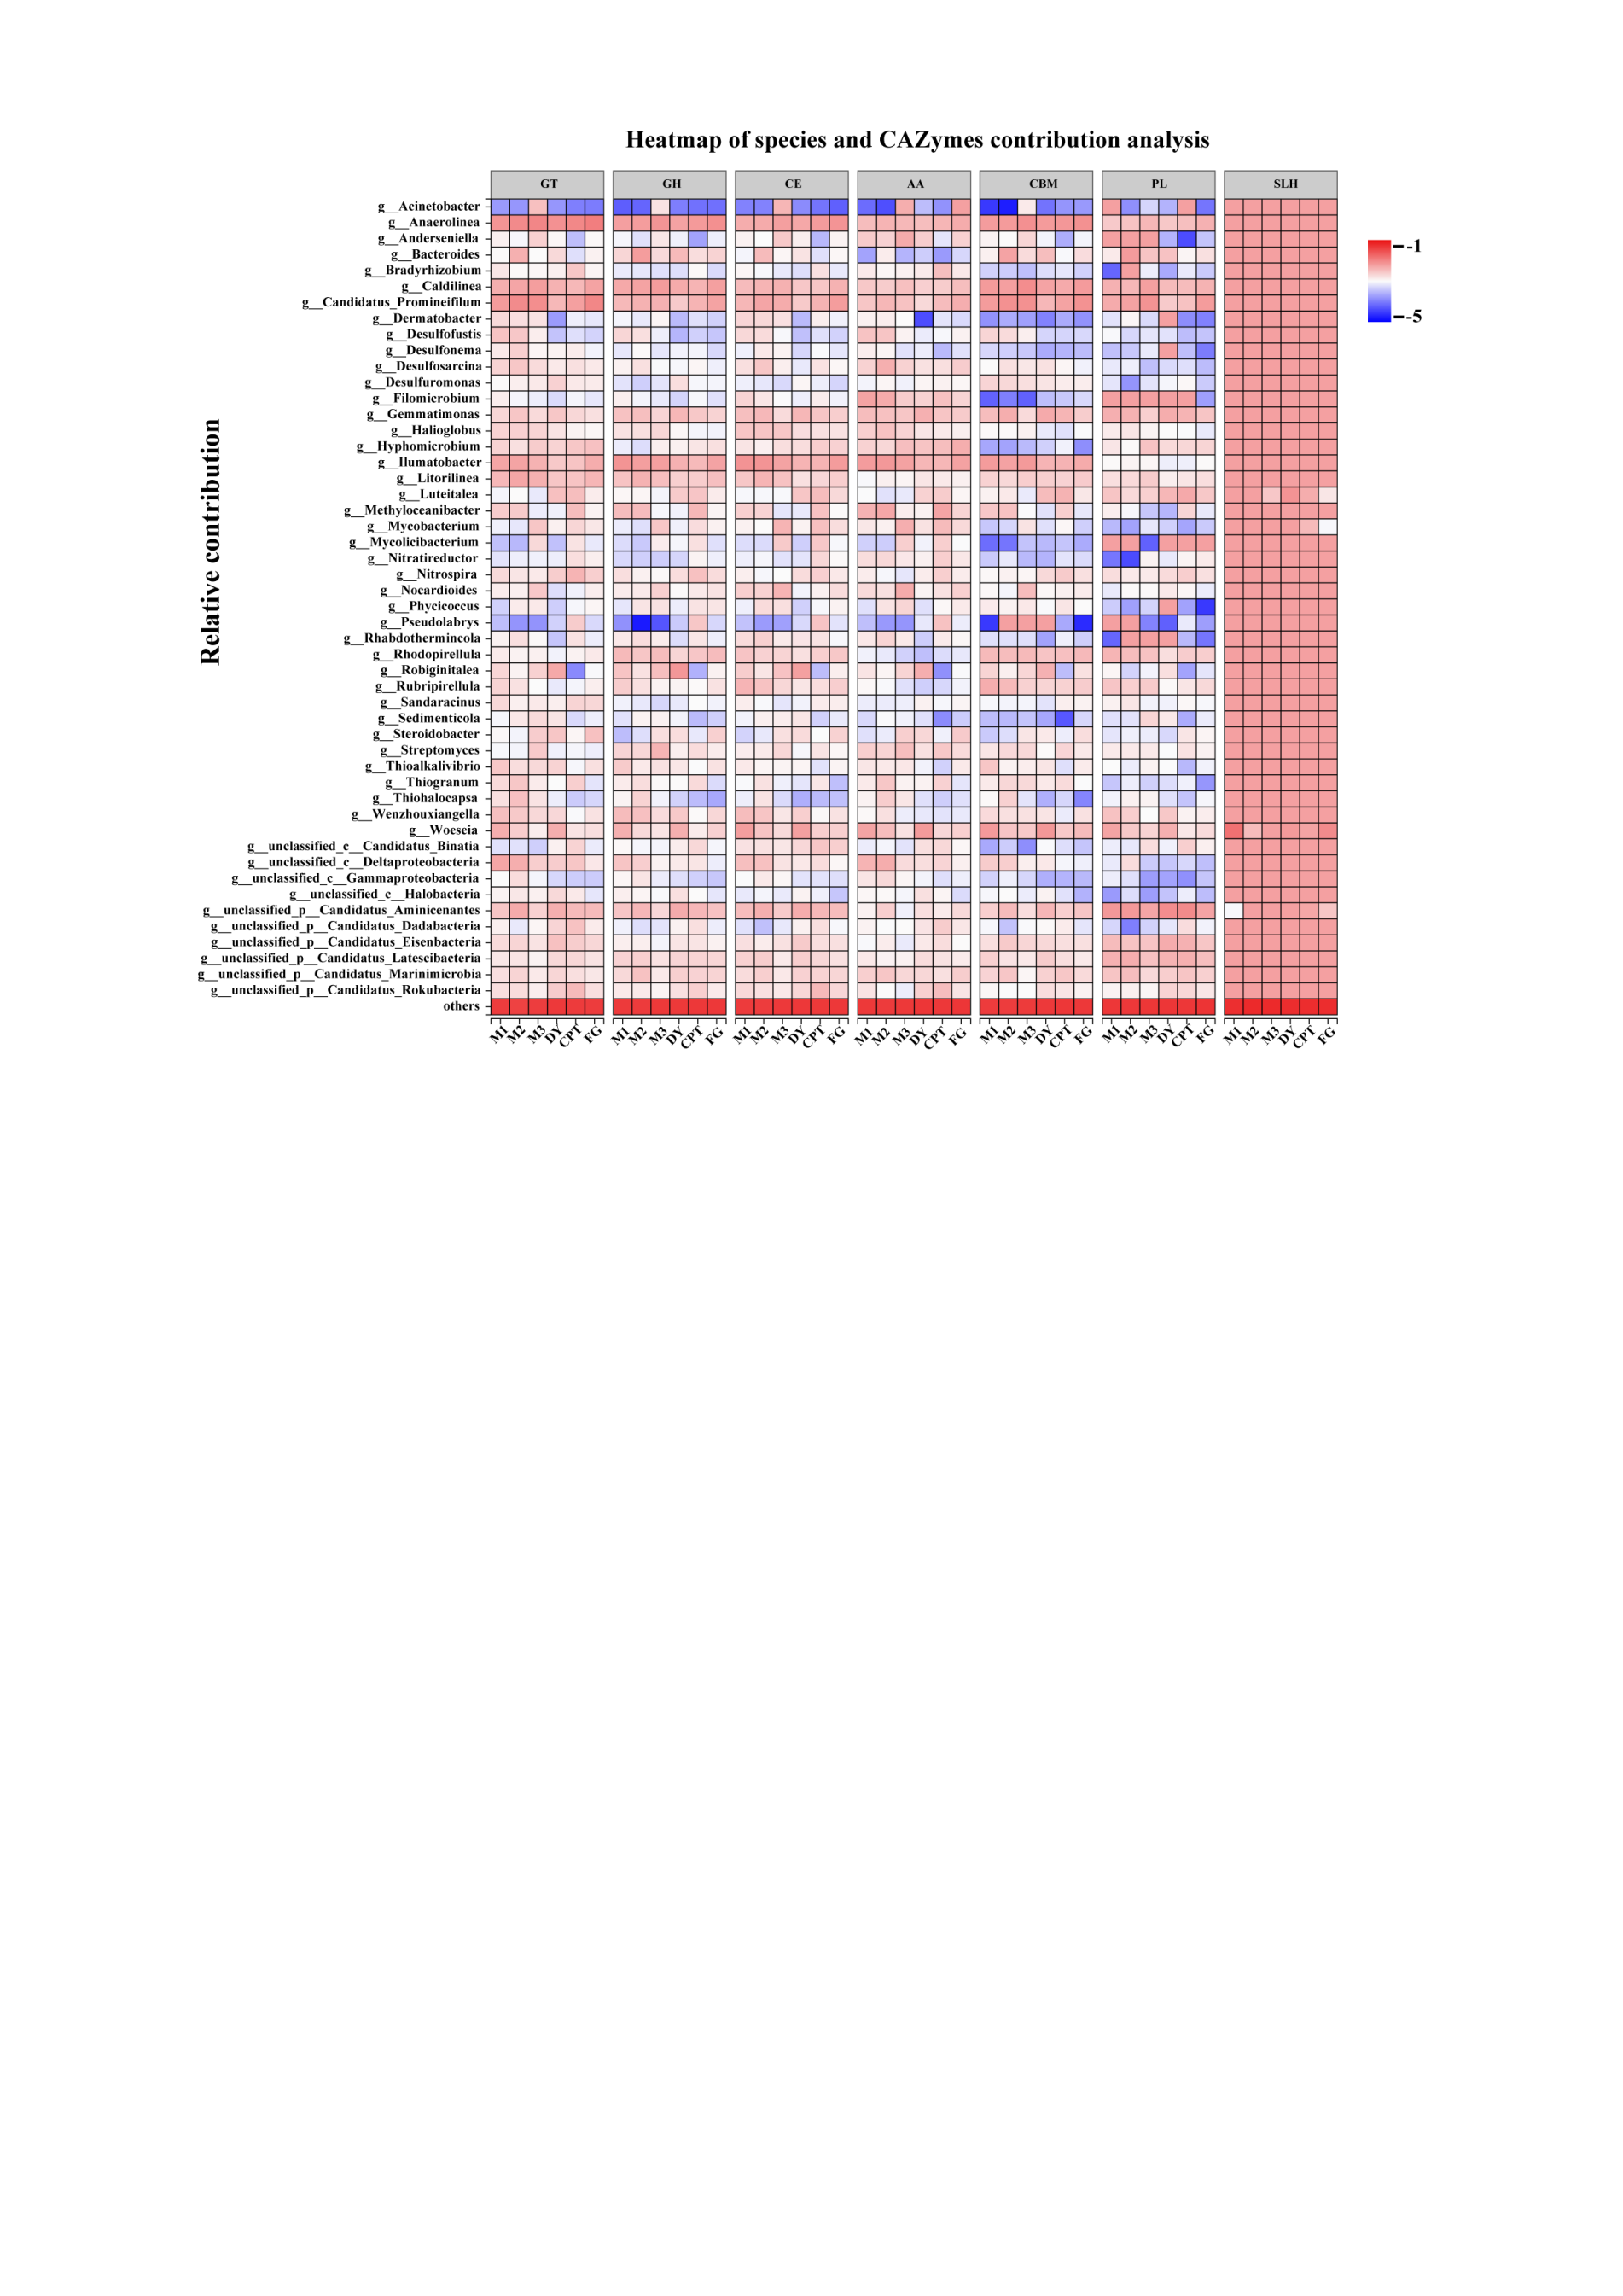


Figure S7 Relative contribution of dominant bacterial genus (top 50) to CAZyme classes across mangrove sampling sections. The heat map displays standardized CAZyme genes abundance values (log-transformed) from dual annotation against both NR and CAZY databases, showing genus-specific contributions to GT (Glycosyl Transferases), GH (Glycoside Hydrolases), CE (Carbohydrate Esterases), AA (Auxiliary Activities), CBM (Carbohydrate-Binding Modules), PL (Polysaccharide Lyases), and SLH (S-layer Homology/Cellulosome Modules).


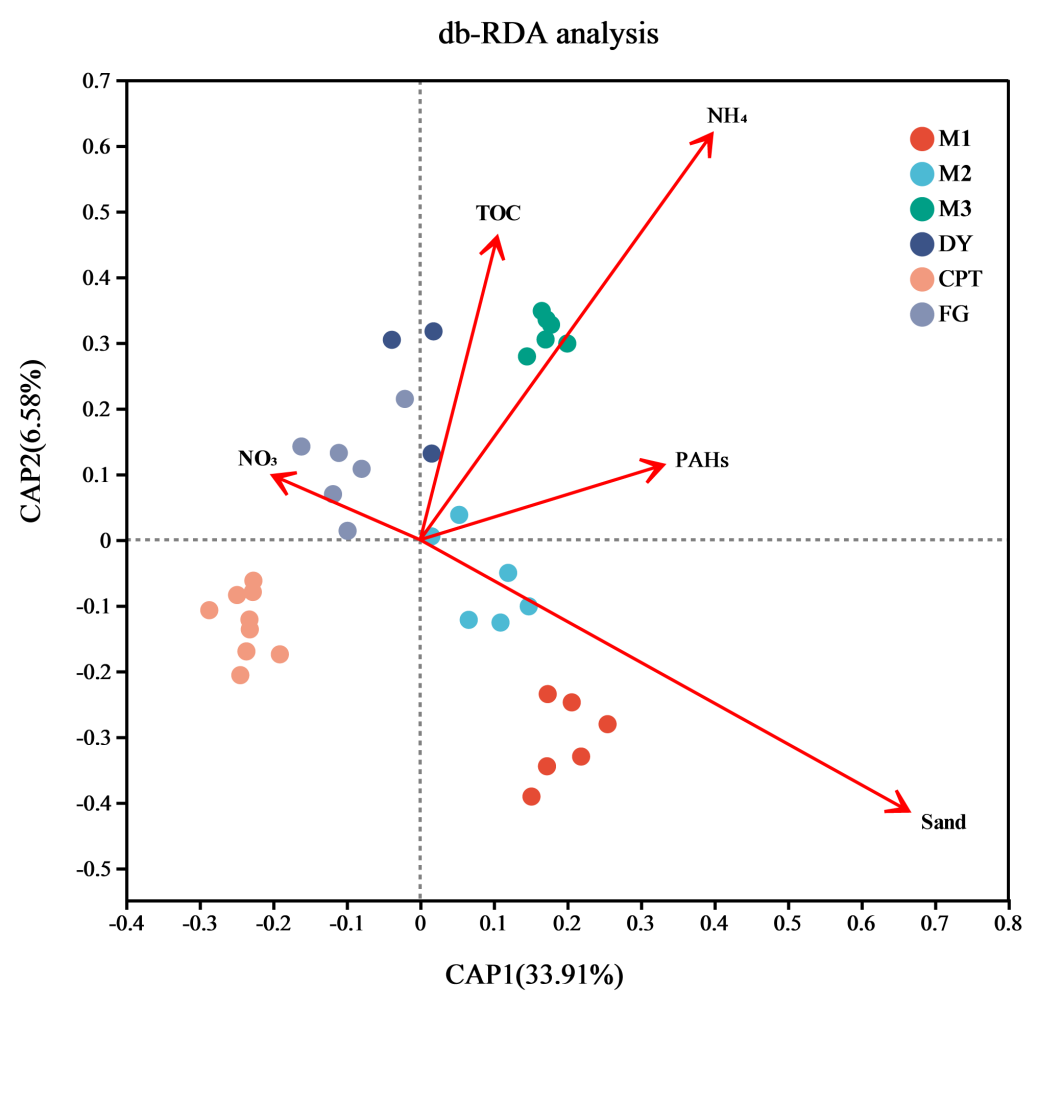


Figure S8 db-RDA of CAZymes family distribution patterns across mangrove sampling sections, showing spatial clustering of CAZyme families by section, and TOC, ammonia, and PAH significantly influencing CAZyme profiles in section M3 (p < 0.05).


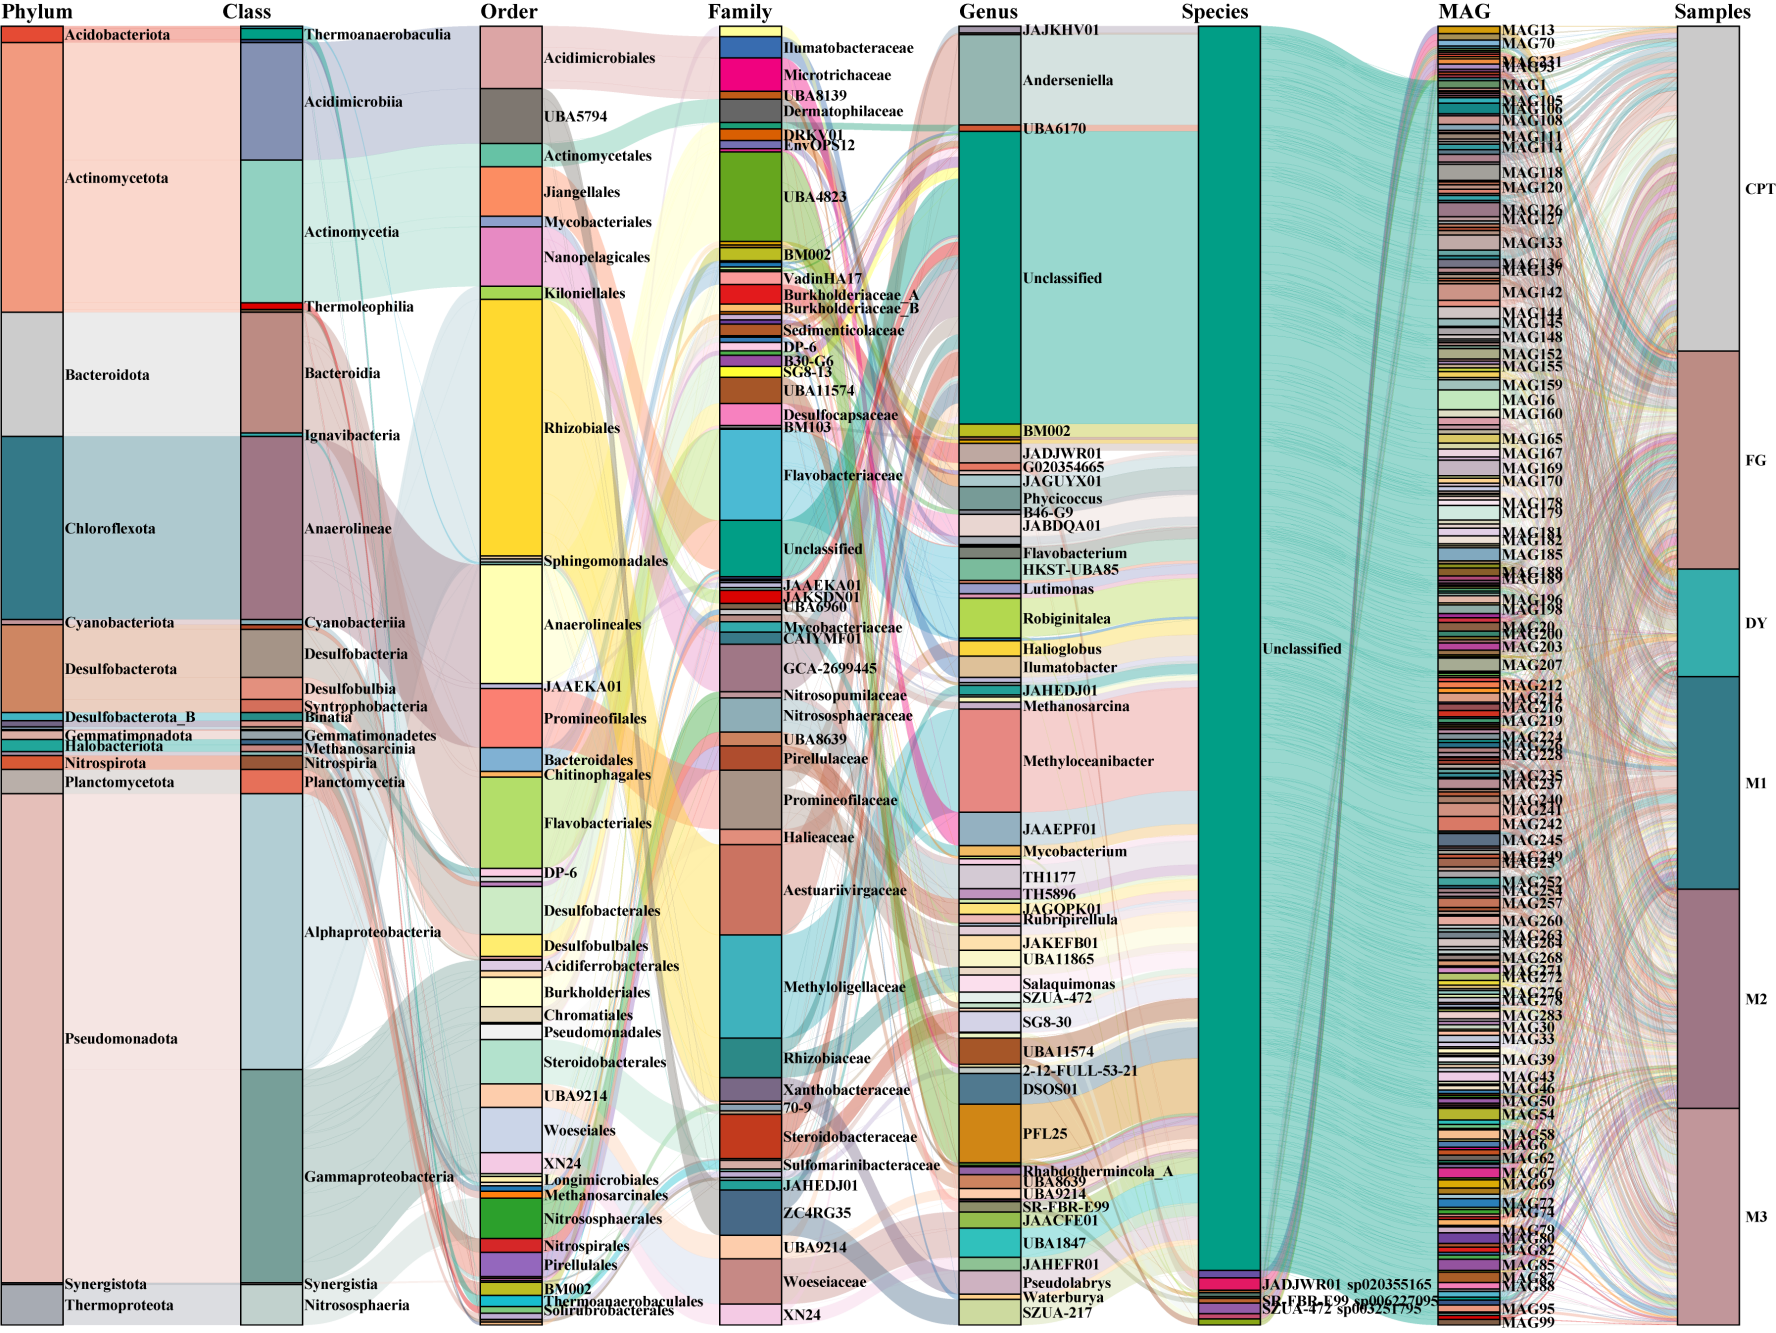


Figure S9 Sankey diagram illustrating the Taxonomic classification of metagenome-assembled genomes (MAGs) recovered from mangrove sediment sections.
