# Supplementary material for: Divergent microbial community and functional dynamics in mangrove sediments along a polycyclic aromatic hydrocarbons (PAHs) gradient in China
Source: Research Square preprint supplement (doi:10.21203/rs.3.rs-7178259/v1), 2025-09-17
Supplement: Supplementary file 2 [file 075cea2605953199194858ce.xlsx]

## Sheet: 98498ASV
domain	kingdom	phylum	class	order	family	genus	species	asv	CPT_LW_1	CPT_LW_2	CPT_LW_3	CPT_MZ_1	CPT_MZ_2	CPT_MZ_3	CPT_SW_1	CPT_SW_2	CPT_SW_3	DY_1	DY_1_S	DY_2	DY_2_S	DY_3	DY_3_S	FG_SC_1	FG_SC_2	FG_SC_3	FG_WR_1	FG_WR_2	FG_WR_3	M1_1_1	M1_1_2	M1_1_3	M1_2_1	M1_2_2	M1_2_3	M1_3_1	M1_3_2	M1_3_3	M2_1_1	M2_1_2	M2_1_3	M2_2_1	M2_2_2	M2_2_3	M2_3_1	M2_3_2	M2_3_3	M3_1_1	M3_1_2
d__Bacteria	k__norank_d__Bacteria	p__Verrucomicrobiota	c__Chlamydiae	o__Chlamydiales	f__Parachlamydiaceae	g__norank_f__Parachlamydiaceae	s__uncultured_bacterium_f__Parachlamydiaceae	ASV80251	0	0	0	0	0	0	0	0	0	0	0	0	0	0	0	0	0	0	0	0	0	0	0	0	0	0	0	0	0	3	0	0	0	0	0	0	0	0	0	0	0
d__Bacteria	k__norank_d__Bacteria	p__SAR324_cladeMarine_group_B	c__norank_p__SAR324_cladeMarine_group_B	o__norank_p__SAR324_cladeMarine_group_B	f__norank_p__SAR324_cladeMarine_group_B	g__norank_p__SAR324_cladeMarine_group_B	s__uncultured_organism_p__SAR324_cladeMarine_group_B	ASV7481	0	0	0	0	0	0	0	0	0	0	0	0	0	0	0	0	0	0	0	0	0	0	0	0	0	0	0	0	27	4	0	0	0	0	0	0	0	6	5	0	0
d__Bacteria	k__norank_d__Bacteria	p__Bacteroidota	c__Bacteroidia	o__Flavobacteriales	f__Flavobacteriaceae	g__unclassified_f__Flavobacteriaceae	s__unclassified_f__Flavobacteriaceae	ASV79414	0	0	0	0	0	0	0	0	0	0	0	0	0	0	0	0	0	0	0	0	0	0	0	0	0	0	0	0	0	0	0	2	0	0	0	0	0	0	0	0	0
d__Bacteria	k__norank_d__Bacteria	p__Bacteroidota	c__Bacteroidia	o__Bacteroidales	f__Bacteroidetes_BD2-2	g__norank_f__Bacteroidetes_BD2-2	s__uncultured_prokaryote_f__Bacteroidetes_BD2-2	ASV32946	0	0	0	0	0	0	0	0	0	0	0	0	0	0	0	0	0	0	0	0	0	0	0	0	0	0	0	0	0	0	0	0	0	0	0	0	0	0	0	0	0
d__Bacteria	k__norank_d__Bacteria	p__Proteobacteria	c__Gammaproteobacteria	o__unclassified_c__Gammaproteobacteria	f__unclassified_c__Gammaproteobacteria	g__unclassified_c__Gammaproteobacteria	s__unclassified_c__Gammaproteobacteria	ASV101700	0	0	0	0	0	0	0	0	0	0	0	0	0	0	0	0	2	0	0	0	0	0	0	0	0	0	0	0	0	0	0	0	0	0	0	0	0	0	0	0	0
d__Bacteria	k__norank_d__Bacteria	p__Proteobacteria	c__Alphaproteobacteria	o__unclassified_c__Alphaproteobacteria	f__unclassified_c__Alphaproteobacteria	g__unclassified_c__Alphaproteobacteria	s__unclassified_c__Alphaproteobacteria	ASV36179	0	0	0	0	0	0	0	0	0	0	0	0	0	0	0	0	0	0	0	0	0	0	0	0	0	0	0	4	0	0	0	0	0	0	0	0	0	0	0	0	0
d__Bacteria	k__norank_d__Bacteria	p__Acidobacteriota	c__Blastocatellia	o__Blastocatellales	f__Blastocatellaceae	g__unclassified_f__Blastocatellaceae	s__unclassified_f__Blastocatellaceae	ASV91121	0	0	0	0	0	0	0	0	0	0	0	0	0	0	0	0	0	0	0	0	3	0	0	0	0	0	0	0	0	0	0	0	0	0	0	0	0	0	0	0	0
d__Bacteria	k__norank_d__Bacteria	p__Gemmatimonadota	c__BD2-11_terrestrial_group	o__norank_c__BD2-11_terrestrial_group	f__norank_c__BD2-11_terrestrial_group	g__norank_c__BD2-11_terrestrial_group	s__uncultured_bacterium_c__BD2-11_terrestrial_group	ASV80948	0	0	0	0	0	0	0	0	0	0	0	0	0	0	0	0	0	0	0	0	0	0	0	0	0	0	0	0	0	3	0	0	0	0	0	0	0	0	0	0	0
d__Bacteria	k__norank_d__Bacteria	p__Desulfobacterota	c__Desulfobulbia	o__Desulfobulbales	f__Desulfocapsaceae	g__norank_f__Desulfocapsaceae	s__unclassified_g__norank_f__Desulfocapsaceae	ASV26201	0	0	0	0	0	0	0	0	0	0	0	0	0	0	0	0	0	0	0	0	0	3	0	0	0	0	0	0	0	0	0	0	0	0	0	0	0	0	0	0	0
d__Bacteria	k__norank_d__Bacteria	p__Firmicutes	c__Clostridia	o__Peptostreptococcales-Tissierellales	f__Peptostreptococcaceae	g__unclassified_f__Peptostreptococcaceae	s__unclassified_f__Peptostreptococcaceae	ASV58420	0	0	0	0	0	0	0	0	0	0	0	0	0	0	0	0	0	0	0	0	0	0	0	0	0	0	0	0	0	0	0	0	3	0	0	0	0	0	0	0	0
d__Bacteria	k__norank_d__Bacteria	p__Proteobacteria	c__Gammaproteobacteria	o__Steroidobacterales	f__Woeseiaceae	g__Woeseia	s__unclassified_g__Woeseia	ASV97360	0	0	0	0	0	0	0	0	0	0	0	0	0	0	0	0	0	0	0	0	0	0	0	0	34	0	0	0	0	0	0	0	0	0	0	0	0	0	0	0	0
d__Bacteria	k__norank_d__Bacteria	p__Bacteroidota	c__Bacteroidia	o__Bacteroidales	f__Bacteroidetes_vadinHA17	g__norank_f__Bacteroidetes_vadinHA17	s__uncultured_bacterium_f__Bacteroidetes_vadinHA17	ASV63612	0	0	0	0	0	0	0	0	0	0	0	0	0	0	0	0	0	0	0	0	0	0	0	0	0	0	0	0	0	0	0	0	0	0	0	1	0	0	0	0	0
d__Bacteria	k__norank_d__Bacteria	p__unclassified_k__norank_d__Bacteria	c__unclassified_k__norank_d__Bacteria	o__unclassified_k__norank_d__Bacteria	f__unclassified_k__norank_d__Bacteria	g__unclassified_k__norank_d__Bacteria	s__unclassified_k__norank_d__Bacteria	ASV63888	0	0	0	0	0	0	0	0	0	0	0	0	0	0	0	0	0	0	0	0	0	0	0	0	0	0	0	0	0	0	0	0	0	0	0	0	0	0	0	0	0
d__Bacteria	k__norank_d__Bacteria	p__Bacteroidota	c__Bacteroidia	o__Bacteroidales	f__unclassified_o__Bacteroidales	g__unclassified_o__Bacteroidales	s__unclassified_o__Bacteroidales	ASV98701	0	0	0	0	0	0	0	0	0	0	0	0	0	0	0	0	7	0	0	0	0	0	0	0	0	0	0	0	0	0	0	0	0	0	0	0	0	0	0	0	0
d__Bacteria	k__norank_d__Bacteria	p__Firmicutes	c__Clostridia	o__Clostridiales	f__Clostridiaceae	g__Clostridium_sensu_stricto_11	s__unclassified_g__Clostridium_sensu_stricto_11	ASV53557	1	0	0	0	0	0	0	0	0	0	0	0	0	0	0	0	0	0	0	0	0	0	0	0	0	0	0	0	0	0	0	0	0	0	0	0	0	0	0	0	0
d__Bacteria	k__norank_d__Bacteria	p__Gemmatimonadota	c__PAUC43f_marine_benthic_group	o__norank_c__PAUC43f_marine_benthic_group	f__norank_c__PAUC43f_marine_benthic_group	g__norank_c__PAUC43f_marine_benthic_group	s__uncultured_bacterium_c__PAUC43f_marine_benthic_group	ASV88034	0	0	0	0	0	0	0	0	0	0	0	0	0	0	0	0	0	0	0	0	0	0	0	2	0	0	0	0	0	0	0	0	0	0	0	0	0	0	0	0	0
d__Bacteria	k__norank_d__Bacteria	p__Firmicutes	c__Clostridia	o__Thermincolales	f__Thermincolaceae	g__Thermincola	s__uncultured_Peptococcaceae_bacterium_g__Thermincola	ASV5455	0	0	0	0	0	0	0	0	0	0	0	0	0	0	3	0	0	0	0	0	0	0	0	0	0	0	0	0	0	0	0	0	0	0	0	0	0	0	0	0	0
d__Bacteria	k__norank_d__Bacteria	p__unclassified_k__norank_d__Bacteria	c__unclassified_k__norank_d__Bacteria	o__unclassified_k__norank_d__Bacteria	f__unclassified_k__norank_d__Bacteria	g__unclassified_k__norank_d__Bacteria	s__unclassified_k__norank_d__Bacteria	ASV6092	0	0	0	0	0	0	0	0	0	0	0	0	0	0	1	0	0	0	0	0	0	0	0	0	0	0	0	0	0	0	0	0	0	0	0	0	0	0	0	0	0
d__Bacteria	k__norank_d__Bacteria	p__Bacteroidota	c__Bacteroidia	o__Cytophagales	f__Cyclobacteriaceae	g__norank_f__Cyclobacteriaceae	s__unclassified_g__norank_f__Cyclobacteriaceae	ASV101047	0	0	0	0	0	0	0	0	0	0	0	0	0	0	0	0	2	0	0	0	0	0	0	0	0	0	0	0	0	0	0	0	0	0	0	0	0	0	0	0	0
d__Bacteria	k__norank_d__Bacteria	p__Proteobacteria	c__Alphaproteobacteria	o__Holosporales	f__Holosporaceae	g__norank_f__Holosporaceae	s__unclassified_g__norank_f__Holosporaceae	ASV99608	0	0	0	0	0	0	0	0	0	0	0	0	0	0	0	0	3	0	0	0	0	0	0	0	0	0	0	0	0	0	0	0	0	0	0	0	0	0	0	0	0
d__Bacteria	k__norank_d__Bacteria	p__Bacteroidota	c__Bacteroidia	o__Flavobacteriales	f__Flavobacteriaceae	g__unclassified_f__Flavobacteriaceae	s__unclassified_f__Flavobacteriaceae	ASV69902	0	0	0	0	0	0	0	0	0	0	13	0	0	0	0	0	0	0	0	0	0	0	0	0	0	0	0	0	0	0	0	0	0	0	0	0	0	0	0	0	0
d__Bacteria	k__norank_d__Bacteria	p__Proteobacteria	c__Gammaproteobacteria	o__Burkholderiales	f__Nitrosomonadaceae	g__MND1	s__unclassified_g__MND1	ASV57288	0	1	0	0	0	0	0	0	0	0	0	0	0	0	0	0	0	0	0	0	0	0	0	0	0	0	0	0	0	0	0	0	0	0	0	0	0	0	0	0	0
d__Bacteria	k__norank_d__Bacteria	p__Proteobacteria	c__Gammaproteobacteria	o__Gammaproteobacteria_Incertae_Sedis	f__unclassified_o__Gammaproteobacteria_Incertae_Sedis	g__norank_f__unclassified_o__Gammaproteobacteria_Incertae_Sedis	s__uncultured_gamma_proteobacterium_f__unclassified_o__Gammaproteobacteria_Incertae_Sedis	ASV7932	0	0	0	0	0	0	0	0	0	0	0	0	0	0	0	0	0	0	0	0	0	0	14	8	0	0	4	0	12	19	0	0	5	0	7	0	0	0	0	0	0
d__Bacteria	k__norank_d__Bacteria	p__Proteobacteria	c__Alphaproteobacteria	o__Rhodobacterales	f__Rhodobacteraceae	g__unclassified_f__Rhodobacteraceae	s__unclassified_f__Rhodobacteraceae	ASV90416	0	0	0	0	0	0	0	0	0	0	0	0	0	0	0	0	0	0	0	0	4	0	0	0	0	0	0	0	0	0	0	0	0	0	0	0	0	0	0	0	0
d__Bacteria	k__norank_d__Bacteria	p__NB1-j	c__norank_p__NB1-j	o__norank_p__NB1-j	f__norank_p__NB1-j	g__norank_p__NB1-j	s__uncultured_bacterium_p__NB1-j	ASV53437	1	0	0	0	0	0	0	0	0	0	0	0	0	0	0	0	0	0	0	0	0	0	0	0	0	0	0	0	0	0	0	0	0	0	0	0	0	0	0	0	0
d__Bacteria	k__norank_d__Bacteria	p__Chloroflexi	c__Anaerolineae	o__RBG-13-54-9	f__norank_o__RBG-13-54-9	g__norank_o__RBG-13-54-9	s__unclassified_g__norank_o__RBG-13-54-9	ASV84993	0	0	0	0	0	0	0	0	0	0	0	0	0	0	0	0	0	0	0	0	0	0	0	0	0	0	0	0	0	0	0	0	0	0	0	0	0	0	0	0	0
d__Bacteria	k__norank_d__Bacteria	p__Firmicutes	c__Bacilli	o__Thermoactinomycetales	f__Thermoactinomycetaceae	g__norank_f__Thermoactinomycetaceae	s__unclassified_g__norank_f__Thermoactinomycetaceae	ASV75645	0	0	0	0	0	0	0	0	0	0	0	0	0	0	0	0	0	0	0	0	0	0	0	0	0	0	0	0	0	0	0	0	0	0	0	0	0	0	0	2	0
d__Bacteria	k__norank_d__Bacteria	p__Cyanobacteria	c__Cyanobacteriia	o__Phormidesmiales	f__Phormidesmiaceae	g__Phormidium_MBIC10003	s__unclassified_g__Phormidium_MBIC10003	ASV9616	0	0	0	0	0	0	0	0	0	0	0	0	0	0	0	0	0	0	0	0	0	0	0	4	0	0	0	0	2	0	0	0	0	0	0	0	0	0	0	0	0
d__Bacteria	k__norank_d__Bacteria	p__Desulfobacterota	c__Syntrophobacteria	o__Syntrophobacterales	f__Syntrophobacteraceae	g__norank_f__Syntrophobacteraceae	s__uncultured_bacterium_f__Syntrophobacteraceae	ASV67852	0	0	0	0	0	0	0	0	0	0	0	0	0	0	0	4	0	0	0	0	0	0	0	0	0	0	0	0	0	0	0	0	0	0	0	0	0	0	0	0	0
d__Bacteria	k__norank_d__Bacteria	p__Proteobacteria	c__Alphaproteobacteria	o__Kiloniellales	f__Kiloniellaceae	g__norank_f__Kiloniellaceae	s__unclassified_g__norank_f__Kiloniellaceae	ASV68486	0	0	0	0	0	0	0	0	0	0	0	0	0	0	0	2	0	0	0	0	0	0	0	0	0	0	0	0	0	0	0	0	0	0	0	0	0	0	0	0	0
d__Bacteria	k__norank_d__Bacteria	p__Actinobacteriota	c__Thermoleophilia	o__Gaiellales	f__norank_o__Gaiellales	g__norank_o__Gaiellales	s__unclassified_g__norank_o__Gaiellales	ASV6838	0	0	0	0	0	0	0	0	0	0	0	0	0	0	2	0	0	0	0	0	0	0	0	0	0	0	0	0	0	0	0	0	0	0	0	0	0	0	0	0	0
d__Bacteria	k__norank_d__Bacteria	p__NB1-j	c__norank_p__NB1-j	o__norank_p__NB1-j	f__norank_p__NB1-j	g__norank_p__NB1-j	s__uncultured_organism_p__NB1-j	ASV33109	0	0	0	0	0	0	0	0	0	0	0	0	0	0	0	0	0	0	0	0	0	0	0	0	0	0	0	0	0	0	0	0	0	0	0	0	0	0	0	0	0
d__Bacteria	k__norank_d__Bacteria	p__Chloroflexi	c__Anaerolineae	o__SBR1031	f__A4b	g__norank_f__A4b	s__unclassified_g__norank_f__A4b	ASV55079	0	0	0	0	0	0	0	0	0	0	0	0	0	0	0	0	0	0	0	0	0	0	0	0	0	0	0	0	0	0	0	0	0	0	0	0	0	0	0	0	0
d__Bacteria	k__norank_d__Bacteria	p__Bacteroidota	c__Bacteroidia	o__Cytophagales	f__Microscillaceae	g__OLB12	s__uncultured_bacterium_g__OLB12	ASV49015	0	0	0	0	0	0	0	0	0	7	0	9	0	4	0	0	0	0	0	0	0	0	0	0	0	0	0	0	0	0	0	0	0	0	0	0	0	0	0	1	0
d__Bacteria	k__norank_d__Bacteria	p__Chloroflexi	c__Dehalococcoidia	o__MSBL5	f__norank_o__MSBL5	g__norank_o__MSBL5	s__uncultured_bacterium_o__MSBL5	ASV38962	0	0	0	0	0	0	0	0	0	0	0	0	0	0	0	0	0	0	2	0	0	0	0	0	0	0	0	0	0	0	0	0	0	0	0	0	0	0	0	0	0
d__Bacteria	k__norank_d__Bacteria	p__Proteobacteria	c__Alphaproteobacteria	o__Rhizobiales	f__Rhizobiaceae	g__unclassified_f__Rhizobiaceae	s__unclassified_f__Rhizobiaceae	ASV52020	4	0	0	0	0	0	0	0	0	0	0	0	0	0	0	0	0	0	0	0	0	0	0	0	0	0	0	0	0	0	0	0	0	0	0	0	0	0	0	0	0
d__Bacteria	k__norank_d__Bacteria	p__Desulfobacterota	c__Desulfobulbia	o__Desulfobulbales	f__Desulfocapsaceae	g__unclassified_f__Desulfocapsaceae	s__unclassified_f__Desulfocapsaceae	ASV6974	0	0	0	0	0	0	0	0	0	0	0	0	0	0	2	0	0	0	0	0	0	0	0	0	0	0	0	0	0	0	0	0	0	0	0	0	0	0	0	0	0
d__Bacteria	k__norank_d__Bacteria	p__Spirochaetota	c__Spirochaetia	o__Spirochaetales	f__Spirochaetaceae	g__Spirochaeta	s__uncultured_bacterium_g__Spirochaeta	ASV70044	0	0	0	0	0	0	0	0	0	0	7	6	0	0	0	0	0	0	0	0	0	0	0	0	0	0	0	0	0	0	0	0	0	0	0	0	0	0	0	0	0
d__Bacteria	k__norank_d__Bacteria	p__Chloroflexi	c__Anaerolineae	o__Anaerolineales	f__Anaerolineaceae	g__Pelolinea	s__uncultured_bacterium_g__Pelolinea	ASV88948	0	0	0	0	0	0	0	0	0	0	0	0	0	0	0	0	0	0	0	0	0	0	0	0	0	0	0	0	0	0	0	0	0	0	0	0	0	0	0	0	0
d__Bacteria	k__norank_d__Bacteria	p__Proteobacteria	c__Alphaproteobacteria	o__unclassified_c__Alphaproteobacteria	f__unclassified_c__Alphaproteobacteria	g__unclassified_c__Alphaproteobacteria	s__unclassified_c__Alphaproteobacteria	ASV73836	0	0	0	0	0	0	0	0	0	0	0	0	0	0	0	0	0	0	0	0	0	0	0	0	0	2	0	0	0	0	0	0	0	0	0	0	0	0	0	0	0
d__Bacteria	k__norank_d__Bacteria	p__Proteobacteria	c__Gammaproteobacteria	o__Burkholderiales	f__Nitrosomonadaceae	g__unclassified_f__Nitrosomonadaceae	s__unclassified_f__Nitrosomonadaceae	ASV47043	0	0	0	1	0	0	0	0	0	0	0	0	0	0	0	0	0	0	0	0	0	0	0	0	0	0	0	0	0	0	0	0	0	0	0	0	0	0	0	0	0
d__Bacteria	k__norank_d__Bacteria	p__Actinobacteriota	c__Acidimicrobiia	o__Microtrichales	f__Microtrichaceae	g__Sva0996_marine_group	s__unclassified_g__Sva0996_marine_group	ASV31911	0	0	0	0	0	0	0	0	0	0	0	0	0	0	0	0	0	0	0	0	0	0	0	0	0	0	0	0	0	0	0	0	0	0	0	0	3	0	0	0	0
d__Bacteria	k__norank_d__Bacteria	p__Verrucomicrobiota	c__Omnitrophia	o__Omnitrophales	f__Omnitrophaceae	g__Candidatus_Omnitrophus	s__unclassified_g__Candidatus_Omnitrophus	ASV33284	0	0	0	0	0	0	0	0	0	0	0	0	0	0	0	0	0	0	0	0	0	0	0	0	0	0	0	0	0	0	0	0	0	0	0	0	0	0	0	0	0
d__Bacteria	k__norank_d__Bacteria	p__Planctomycetota	c__Pla4_lineage	o__norank_c__Pla4_lineage	f__norank_c__Pla4_lineage	g__norank_c__Pla4_lineage	s__unclassified_g__norank_c__Pla4_lineage	ASV98023	0	0	0	0	0	0	0	0	0	0	0	0	0	0	0	0	0	0	0	0	0	0	0	0	2	0	0	0	0	0	0	0	0	0	0	0	0	0	0	0	0
d__Bacteria	k__norank_d__Bacteria	p__Firmicutes	c__norank_p__Firmicutes	o__norank_p__Firmicutes	f__norank_p__Firmicutes	g__norank_p__Firmicutes	s__uncultured_bacterium_p__Firmicutes	ASV26925	0	0	0	0	0	0	0	0	0	0	0	0	0	0	0	0	0	0	0	0	0	1	0	0	0	0	0	0	0	0	0	0	0	0	0	0	0	0	0	0	0
d__Bacteria	k__norank_d__Bacteria	p__Firmicutes	c__Clostridia	o__Peptostreptococcales-Tissierellales	f__norank_o__Peptostreptococcales-Tissierellales	g__Alkaliphilus	s__unclassified_g__Alkaliphilus	ASV65445	0	0	4	0	0	0	0	0	0	0	0	0	0	0	0	0	0	0	0	0	0	0	0	0	0	0	0	0	0	0	0	0	0	0	0	0	0	0	0	0	0
d__Bacteria	k__norank_d__Bacteria	p__Firmicutes	c__Clostridia	o__Christensenellales	f__Christensenellaceae	g__norank_f__Christensenellaceae	s__uncultured_bacterium_f__Christensenellaceae	ASV6102	0	0	0	0	0	0	0	0	0	0	0	0	6	0	2	0	0	0	0	0	0	0	0	0	0	0	0	0	0	0	0	0	0	0	0	0	0	0	0	0	0
d__Bacteria	k__norank_d__Bacteria	p__Sva0485	c__norank_p__Sva0485	o__norank_p__Sva0485	f__norank_p__Sva0485	g__norank_p__Sva0485	s__unclassified_g__norank_p__Sva0485	ASV42805	0	0	0	0	0	0	0	0	0	0	0	0	0	0	0	0	0	0	0	2	0	0	0	0	0	0	0	0	0	0	0	0	0	0	0	0	0	0	0	0	0
d__Bacteria	k__norank_d__Bacteria	p__Bacteroidota	c__Bacteroidia	o__Sphingobacteriales	f__S15A-MN91	g__norank_f__S15A-MN91	s__uncultured_bacterium_f__S15A-MN91	ASV5572	0	0	0	0	0	0	0	0	0	0	0	0	0	3	1	0	0	0	0	0	0	0	0	0	0	0	0	0	0	0	0	0	0	0	0	0	0	0	0	0	0
d__Bacteria	k__norank_d__Bacteria	p__SAR324_cladeMarine_group_B	c__norank_p__SAR324_cladeMarine_group_B	o__norank_p__SAR324_cladeMarine_group_B	f__norank_p__SAR324_cladeMarine_group_B	g__norank_p__SAR324_cladeMarine_group_B	s__unclassified_g__norank_p__SAR324_cladeMarine_group_B	ASV10489	0	0	0	0	0	0	0	0	0	0	0	0	0	0	0	0	0	0	0	0	0	0	0	0	0	0	0	0	2	0	0	0	0	0	0	0	0	0	0	0	0
d__Bacteria	k__norank_d__Bacteria	p__unclassified_k__norank_d__Bacteria	c__unclassified_k__norank_d__Bacteria	o__unclassified_k__norank_d__Bacteria	f__unclassified_k__norank_d__Bacteria	g__unclassified_k__norank_d__Bacteria	s__unclassified_k__norank_d__Bacteria	ASV79191	0	0	0	0	0	0	0	0	0	0	0	0	0	0	0	0	0	0	0	0	0	0	0	0	0	0	0	0	0	0	0	1	0	0	0	0	0	0	0	0	0
d__Bacteria	k__norank_d__Bacteria	p__unclassified_k__norank_d__Bacteria	c__unclassified_k__norank_d__Bacteria	o__unclassified_k__norank_d__Bacteria	f__unclassified_k__norank_d__Bacteria	g__unclassified_k__norank_d__Bacteria	s__unclassified_k__norank_d__Bacteria	ASV18614	0	0	0	0	0	0	0	0	0	0	0	0	0	0	0	0	0	0	0	0	0	0	0	0	0	0	1	0	0	0	0	0	0	0	0	0	0	0	0	0	0
d__Bacteria	k__norank_d__Bacteria	p__Proteobacteria	c__Alphaproteobacteria	o__Rhodobacterales	f__Rhodobacteraceae	g__unclassified_f__Rhodobacteraceae	s__unclassified_f__Rhodobacteraceae	ASV25059	0	0	0	0	0	0	0	0	0	0	0	0	0	0	0	0	0	2	0	0	0	0	0	0	0	0	0	0	0	0	0	0	0	0	0	0	0	0	0	0	0
d__Bacteria	k__norank_d__Bacteria	p__Acidobacteriota	c__Blastocatellia	o__Blastocatellales	f__Blastocatellaceae	g__unclassified_f__Blastocatellaceae	s__unclassified_f__Blastocatellaceae	ASV49563	0	0	0	0	0	0	0	0	0	4	0	0	0	0	0	0	0	0	0	0	0	0	0	0	0	0	0	0	0	0	0	0	0	0	0	0	0	0	0	0	0
d__Bacteria	k__norank_d__Bacteria	p__Dependentiae	c__Babeliae	o__Babeliales	f__unclassified_o__Babeliales	g__unclassified_o__Babeliales	s__unclassified_o__Babeliales	ASV80910	0	0	0	0	0	0	0	0	0	0	0	0	0	0	0	0	0	0	0	0	0	0	0	0	0	0	0	0	0	1	0	0	0	0	0	0	0	0	0	0	0
d__Bacteria	k__norank_d__Bacteria	p__Proteobacteria	c__Gammaproteobacteria	o__unclassified_c__Gammaproteobacteria	f__unclassified_c__Gammaproteobacteria	g__unclassified_c__Gammaproteobacteria	s__unclassified_c__Gammaproteobacteria	ASV56857	0	1	0	0	0	0	0	0	0	0	0	0	0	0	0	0	0	0	0	0	0	0	0	0	0	0	0	0	0	0	0	0	0	0	0	0	0	0	0	0	0
d__Bacteria	k__norank_d__Bacteria	p__Chloroflexi	c__Anaerolineae	o__Caldilineales	f__Caldilineaceae	g__norank_f__Caldilineaceae	s__unclassified_g__norank_f__Caldilineaceae	ASV96177	0	0	0	0	0	0	0	0	0	0	0	0	0	0	0	0	0	0	0	0	0	0	0	0	0	0	0	0	0	0	0	0	0	0	0	0	0	0	0	0	2
d__Bacteria	k__norank_d__Bacteria	p__unclassified_k__norank_d__Bacteria	c__unclassified_k__norank_d__Bacteria	o__unclassified_k__norank_d__Bacteria	f__unclassified_k__norank_d__Bacteria	g__unclassified_k__norank_d__Bacteria	s__unclassified_k__norank_d__Bacteria	ASV69387	0	0	0	0	0	0	0	0	0	0	0	0	0	0	0	1	0	0	0	0	0	0	0	0	0	0	0	0	0	0	0	0	0	0	0	0	0	0	0	0	0
d__Bacteria	k__norank_d__Bacteria	p__Bacteroidota	c__Bacteroidia	o__Cytophagales	f__Cyclobacteriaceae	g__norank_f__Cyclobacteriaceae	s__unclassified_g__norank_f__Cyclobacteriaceae	ASV35137	0	0	0	0	0	0	0	0	0	0	0	0	0	0	0	0	0	0	0	0	0	0	0	0	0	0	0	0	0	0	0	0	0	0	0	0	0	0	0	0	0
d__Bacteria	k__norank_d__Bacteria	p__Calditrichota	c__Calditrichia	o__Calditrichales	f__Calditrichaceae	g__norank_f__Calditrichaceae	s__uncultured_Deferribacteres_bacterium_f__Calditrichaceae	ASV46824	0	0	0	2	0	0	0	0	0	0	0	0	0	0	0	0	0	0	0	0	0	0	0	0	0	0	0	0	0	0	0	0	0	0	0	0	0	0	0	0	0
d__Bacteria	k__norank_d__Bacteria	p__NB1-j	c__norank_p__NB1-j	o__norank_p__NB1-j	f__norank_p__NB1-j	g__norank_p__NB1-j	s__unclassified_g__norank_p__NB1-j	ASV68528	0	0	0	0	0	0	0	0	0	0	0	0	0	0	0	2	0	0	0	0	0	0	0	0	0	0	0	0	0	0	0	0	0	0	0	0	0	0	0	0	0
d__Bacteria	k__norank_d__Bacteria	p__Proteobacteria	c__Gammaproteobacteria	o__unclassified_c__Gammaproteobacteria	f__unclassified_c__Gammaproteobacteria	g__unclassified_c__Gammaproteobacteria	s__unclassified_c__Gammaproteobacteria	ASV86137	0	0	0	0	0	0	0	0	0	0	0	0	0	0	0	0	0	0	0	0	0	0	0	0	0	0	0	0	0	0	0	0	0	0	0	0	0	0	0	0	0
d__Bacteria	k__norank_d__Bacteria	p__Chloroflexi	c__KD4-96	o__norank_c__KD4-96	f__norank_c__KD4-96	g__norank_c__KD4-96	s__unclassified_g__norank_c__KD4-96	ASV69923	0	0	0	0	0	0	0	0	0	0	11	0	0	0	0	0	0	0	0	0	0	0	0	0	0	0	0	0	0	0	0	0	0	0	0	0	0	0	0	0	0
d__Bacteria	k__norank_d__Bacteria	p__Actinobacteriota	c__unclassified_p__Actinobacteriota	o__unclassified_p__Actinobacteriota	f__unclassified_p__Actinobacteriota	g__unclassified_p__Actinobacteriota	s__unclassified_p__Actinobacteriota	ASV49747	0	0	0	0	0	0	0	0	0	3	0	0	0	0	0	0	0	0	0	0	0	0	0	0	0	0	0	0	0	0	0	0	0	0	0	0	0	0	0	0	0
d__Bacteria	k__norank_d__Bacteria	p__Firmicutes	c__Bacilli	o__Alicyclobacillales	f__Alicyclobacillaceae	g__Tumebacillus	s__unclassified_g__Tumebacillus	ASV948	0	0	0	0	0	0	0	0	0	0	0	0	0	0	0	0	0	0	0	0	0	0	0	0	0	0	0	0	0	0	0	0	0	0	0	0	0	0	0	0	0
d__Bacteria	k__norank_d__Bacteria	p__Acidobacteriota	c__Thermoanaerobaculia	o__Thermoanaerobaculales	f__Thermoanaerobaculaceae	g__Subgroup_23	s__unclassified_g__Subgroup_23	ASV75225	0	0	0	0	0	0	0	0	0	0	0	0	0	0	0	0	0	0	0	0	0	0	0	0	0	0	0	0	0	0	0	0	0	0	0	0	0	0	0	4	0
d__Bacteria	k__norank_d__Bacteria	p__Armatimonadota	c__DG-56	o__norank_c__DG-56	f__norank_c__DG-56	g__norank_c__DG-56	s__uncultured_bacterium_c__DG-56	ASV86749	0	0	0	0	0	0	0	0	0	0	0	0	0	0	0	0	0	0	0	0	0	0	0	5	0	0	0	0	0	0	0	0	0	0	0	0	0	0	0	0	0
d__Bacteria	k__norank_d__Bacteria	p__Patescibacteria	c__Gracilibacteria	o__Candidatus_Abawacabacteria	f__norank_o__Candidatus_Abawacabacteria	g__norank_o__Candidatus_Abawacabacteria	s__uncultured_organism_o__Candidatus_Abawacabacteria	ASV19922	0	0	0	0	0	0	0	0	0	0	0	0	0	0	0	0	0	0	0	0	0	0	0	0	0	0	0	0	0	0	0	0	0	15	6	5	5	0	0	0	0
d__Bacteria	k__norank_d__Bacteria	p__Chloroflexi	c__Anaerolineae	o__SBR1031	f__norank_o__SBR1031	g__norank_o__SBR1031	s__unclassified_g__norank_o__SBR1031	ASV66000	0	0	2	0	0	0	0	0	0	0	0	0	0	0	0	0	0	0	0	0	0	0	0	0	0	0	0	0	0	0	0	0	0	0	0	0	0	0	0	0	0
d__Bacteria	k__norank_d__Bacteria	p__Nitrospirota	c__Nitrospiria	o__Nitrospirales	f__Nitrospiraceae	g__Nitrospira	s__unclassified_g__Nitrospira	ASV65102	0	0	8	0	0	0	0	0	0	0	0	0	0	0	0	0	0	0	0	0	0	0	0	0	0	0	0	0	0	0	0	0	0	0	0	0	0	0	0	0	0
d__Bacteria	k__norank_d__Bacteria	p__Bacteroidota	c__Kryptonia	o__Kryptoniales	f__MSB-3C8	g__norank_f__MSB-3C8	s__uncultured_bacterium_f__MSB-3C8	ASV97742	0	0	0	0	0	0	0	0	0	0	0	0	0	0	0	0	0	0	0	0	0	0	0	0	3	0	0	0	0	0	0	0	0	0	0	0	0	0	0	0	0
d__Bacteria	k__norank_d__Bacteria	p__Actinobacteriota	c__Acidimicrobiia	o__Microtrichales	f__Ilumatobacteraceae	g__Ilumatobacter	s__unclassified_g__Ilumatobacter	ASV16285	0	0	0	0	0	0	0	0	0	0	0	0	0	0	0	0	0	0	0	0	0	0	0	0	0	0	10	0	0	0	0	0	0	0	0	0	0	0	0	0	0
d__Bacteria	k__norank_d__Bacteria	p__Chloroflexi	c__Anaerolineae	o__Anaerolineales	f__Anaerolineaceae	g__unclassified_f__Anaerolineaceae	s__unclassified_f__Anaerolineaceae	ASV44369	0	0	0	0	0	0	2	0	0	0	0	0	0	0	0	0	0	0	0	0	0	0	0	0	0	0	0	0	0	0	0	0	0	0	0	0	0	0	0	0	0
d__Bacteria	k__norank_d__Bacteria	p__Proteobacteria	c__Gammaproteobacteria	o__Cellvibrionales	f__Halieaceae	g__unclassified_f__Halieaceae	s__unclassified_f__Halieaceae	ASV9504	0	0	0	0	0	0	0	0	0	0	0	0	0	0	0	0	0	0	0	0	0	0	0	0	0	0	0	0	1	0	0	0	0	0	0	0	0	0	0	0	0
d__Bacteria	k__norank_d__Bacteria	p__Firmicutes	c__Clostridia	o__Lachnospirales	f__unclassified_o__Lachnospirales	g__unclassified_o__Lachnospirales	s__unclassified_o__Lachnospirales	ASV83735	0	0	0	0	0	0	0	0	0	0	0	0	0	0	0	0	0	0	0	0	0	0	0	0	0	0	0	0	0	0	1	0	0	0	0	0	0	0	0	0	0
d__Bacteria	k__norank_d__Bacteria	p__Proteobacteria	c__Alphaproteobacteria	o__Rhizobiales	f__unclassified_o__Rhizobiales	g__unclassified_o__Rhizobiales	s__unclassified_o__Rhizobiales	ASV59814	0	0	0	0	0	0	0	0	0	0	0	0	0	0	0	0	0	0	0	0	0	0	0	0	0	0	0	0	0	0	0	0	0	0	0	0	0	0	0	0	0
d__Bacteria	k__norank_d__Bacteria	p__unclassified_k__norank_d__Bacteria	c__unclassified_k__norank_d__Bacteria	o__unclassified_k__norank_d__Bacteria	f__unclassified_k__norank_d__Bacteria	g__unclassified_k__norank_d__Bacteria	s__unclassified_k__norank_d__Bacteria	ASV42510	0	0	0	0	0	0	0	0	0	0	0	0	0	0	0	0	0	0	0	2	0	0	0	0	0	0	0	0	0	0	0	0	0	0	0	0	0	0	0	0	0
d__Bacteria	k__norank_d__Bacteria	p__Acidobacteriota	c__unclassified_p__Acidobacteriota	o__unclassified_p__Acidobacteriota	f__unclassified_p__Acidobacteriota	g__unclassified_p__Acidobacteriota	s__unclassified_p__Acidobacteriota	ASV20810	0	0	0	0	0	0	0	0	0	0	0	0	0	0	0	0	0	0	0	0	0	0	0	0	0	0	0	0	0	0	0	0	0	0	2	0	0	0	0	0	0
d__Bacteria	k__norank_d__Bacteria	p__Proteobacteria	c__Alphaproteobacteria	o__Rhizobiales	f__unclassified_o__Rhizobiales	g__unclassified_o__Rhizobiales	s__unclassified_o__Rhizobiales	ASV45283	0	0	0	4	0	0	0	0	0	0	0	0	0	0	0	0	0	0	0	0	0	0	0	0	0	0	0	0	0	0	0	0	0	0	0	0	0	0	0	0	0
d__Bacteria	k__norank_d__Bacteria	p__Deinococcota	c__Deinococci	o__Deinococcales	f__Trueperaceae	g__Truepera	s__uncultured_bacterium_g__Truepera	ASV49575	0	0	0	0	0	0	0	0	0	4	8	0	0	0	0	0	0	0	0	0	0	0	0	0	0	0	0	0	0	0	0	0	0	0	0	0	0	0	0	0	0
d__Bacteria	k__norank_d__Bacteria	p__Proteobacteria	c__Alphaproteobacteria	o__Sphingomonadales	f__Sphingomonadaceae	g__Sphingomicrobium	s__unclassified_g__Sphingomicrobium	ASV81791	0	0	0	0	0	0	0	0	0	0	0	0	0	0	0	0	0	0	0	0	0	0	0	0	0	0	0	0	0	2	0	0	0	0	0	0	0	0	0	0	0
d__Bacteria	k__norank_d__Bacteria	p__Myxococcota	c__Polyangia	o__Polyangiales	f__Sandaracinaceae	g__norank_f__Sandaracinaceae	s__unclassified_g__norank_f__Sandaracinaceae	ASV95632	0	0	0	0	0	0	0	0	0	0	0	0	0	0	0	0	0	0	0	0	0	0	0	0	0	0	0	0	0	0	0	0	0	0	0	0	0	0	0	0	0
d__Bacteria	k__norank_d__Bacteria	p__Chloroflexi	c__Anaerolineae	o__Anaerolineales	f__Anaerolineaceae	g__norank_f__Anaerolineaceae	s__unclassified_g__norank_f__Anaerolineaceae	ASV25158	0	0	0	0	0	0	0	0	0	0	0	0	0	0	0	0	0	0	0	0	0	29	0	0	0	0	0	0	0	0	0	0	0	0	0	0	0	0	0	0	0
d__Bacteria	k__norank_d__Bacteria	p__Acidobacteriota	c__Subgroup_21	o__norank_c__Subgroup_21	f__norank_c__Subgroup_21	g__norank_c__Subgroup_21	s__uncultured_bacterium_c__Subgroup_21	ASV64824	0	0	0	0	0	0	0	0	0	0	0	0	0	0	0	0	0	0	0	0	0	0	0	0	0	0	0	0	0	0	0	0	0	0	0	0	0	0	0	0	0
d__Bacteria	k__norank_d__Bacteria	p__unclassified_k__norank_d__Bacteria	c__unclassified_k__norank_d__Bacteria	o__unclassified_k__norank_d__Bacteria	f__unclassified_k__norank_d__Bacteria	g__unclassified_k__norank_d__Bacteria	s__unclassified_k__norank_d__Bacteria	ASV91762	0	0	0	0	0	0	0	0	0	0	0	0	0	0	0	0	0	0	0	0	2	0	0	0	0	0	0	0	0	0	0	0	0	0	0	0	0	0	0	0	0
d__Bacteria	k__norank_d__Bacteria	p__Proteobacteria	c__Gammaproteobacteria	o__Gammaproteobacteria_Incertae_Sedis	f__unclassified_o__Gammaproteobacteria_Incertae_Sedis	g__norank_f__unclassified_o__Gammaproteobacteria_Incertae_Sedis	s__unclassified_g__norank_f__unclassified_o__Gammaproteobacteria_Incertae_Sedis	ASV19010	0	0	0	0	0	0	0	0	0	0	0	0	0	0	0	0	0	0	0	0	0	0	0	0	0	0	1	0	0	0	0	0	0	0	0	0	0	0	0	0	0
d__Bacteria	k__norank_d__Bacteria	p__Actinobacteriota	c__Acidimicrobiia	o__Microtrichales	f__Ilumatobacteraceae	g__norank_f__Ilumatobacteraceae	s__unclassified_g__norank_f__Ilumatobacteraceae	ASV71951	0	0	0	0	0	0	0	0	0	0	1	0	0	0	0	0	0	0	0	0	0	0	0	0	0	0	0	0	0	0	0	0	0	0	0	0	0	0	0	0	0
d__Bacteria	k__norank_d__Bacteria	p__Desulfobacterota	c__Desulfuromonadia	o__PB19	f__norank_o__PB19	g__norank_o__PB19	s__unclassified_g__norank_o__PB19	ASV70451	0	0	0	0	0	0	0	0	0	0	2	0	0	0	0	0	0	0	0	0	0	0	0	0	0	0	0	0	0	0	0	0	0	0	0	0	0	0	0	0	0
d__Bacteria	k__norank_d__Bacteria	p__Proteobacteria	c__Gammaproteobacteria	o__unclassified_c__Gammaproteobacteria	f__unclassified_c__Gammaproteobacteria	g__unclassified_c__Gammaproteobacteria	s__unclassified_c__Gammaproteobacteria	ASV52851	2	0	0	0	0	0	0	0	0	0	0	0	0	0	0	0	0	0	0	0	0	0	0	0	0	0	0	0	0	0	0	0	0	0	0	0	0	0	0	0	0
d__Bacteria	k__norank_d__Bacteria	p__Proteobacteria	c__Gammaproteobacteria	o__Cellvibrionales	f__BD2-7	g__norank_f__BD2-7	s__uncultured_bacterium_f__BD2-7	ASV99397	0	0	0	0	0	0	0	0	0	0	0	0	0	0	0	0	4	0	0	0	0	0	0	0	0	0	0	0	0	0	0	0	0	0	0	0	0	0	0	0	0
d__Bacteria	k__norank_d__Bacteria	p__Myxococcota	c__Myxococcia	o__Myxococcales	f__Myxococcaceae	g__unclassified_f__Myxococcaceae	s__unclassified_f__Myxococcaceae	ASV96053	0	0	0	0	0	0	0	0	0	0	0	0	0	0	0	0	0	0	0	0	0	0	0	0	0	0	0	0	0	0	0	0	0	0	0	0	0	0	0	0	4
d__Bacteria	k__norank_d__Bacteria	p__Chloroflexi	c__Anaerolineae	o__SBR1031	f__norank_o__SBR1031	g__norank_o__SBR1031	s__unclassified_g__norank_o__SBR1031	ASV46720	0	0	0	2	0	0	0	0	0	0	0	0	0	0	0	0	0	0	0	0	0	0	0	0	0	0	0	0	0	0	0	0	0	0	0	0	0	0	0	0	0
d__Bacteria	k__norank_d__Bacteria	p__Gemmatimonadota	c__PAUC43f_marine_benthic_group	o__norank_c__PAUC43f_marine_benthic_group	f__norank_c__PAUC43f_marine_benthic_group	g__norank_c__PAUC43f_marine_benthic_group	s__unclassified_g__norank_c__PAUC43f_marine_benthic_group	ASV63007	0	0	0	0	0	0	0	0	0	0	0	0	0	0	0	0	0	0	0	0	0	0	0	0	0	0	0	0	0	0	0	0	0	0	0	2	0	0	0	0	0
d__Bacteria	k__norank_d__Bacteria	p__Acidobacteriota	c__Subgroup_21	o__norank_c__Subgroup_21	f__norank_c__Subgroup_21	g__norank_c__Subgroup_21	s__uncultured_bacterium_c__Subgroup_21	ASV31627	0	0	0	0	0	0	0	0	0	0	0	0	0	0	0	0	0	0	0	0	0	0	0	0	0	0	0	0	0	0	0	0	0	0	0	0	4	0	0	0	0
d__Bacteria	k__norank_d__Bacteria	p__NKB15	c__norank_p__NKB15	o__norank_p__NKB15	f__norank_p__NKB15	g__norank_p__NKB15	s__uncultured_bacterium_p__NKB15	ASV11693	0	0	0	0	0	0	0	0	0	0	0	0	4	0	0	0	0	0	0	0	0	0	0	0	0	0	0	0	0	0	0	0	0	0	0	0	0	0	0	0	0
d__Bacteria	k__norank_d__Bacteria	p__Chloroflexi	c__Anaerolineae	o__SJA-15	f__norank_o__SJA-15	g__norank_o__SJA-15	s__uncultured_bacterium_o__SJA-15	ASV69997	0	0	0	0	0	0	0	0	0	0	7	0	0	0	0	0	0	0	0	0	0	0	0	0	0	0	0	0	0	0	0	0	0	0	0	0	0	0	0	0	0
d__Bacteria	k__norank_d__Bacteria	p__Actinobacteriota	c__Acidimicrobiia	o__Microtrichales	f__Ilumatobacteraceae	g__unclassified_f__Ilumatobacteraceae	s__unclassified_f__Ilumatobacteraceae	ASV91893	0	0	0	0	0	0	0	0	0	0	0	0	0	0	0	0	0	0	0	0	2	0	0	0	0	0	0	0	0	0	0	0	0	0	0	0	0	0	0	0	0
d__Bacteria	k__norank_d__Bacteria	p__Firmicutes	c__Bacilli	o__Bacillales	f__Bacillaceae	g__Bacillus	s__unclassified_g__Bacillus	ASV36135	0	0	0	0	0	0	0	0	0	0	0	0	0	0	0	0	0	0	0	0	0	0	0	0	0	0	0	5	0	0	0	0	0	0	0	0	0	0	0	0	0
d__Bacteria	k__norank_d__Bacteria	p__Nitrospirota	c__Nitrospiria	o__Nitrospirales	f__Nitrospiraceae	g__Nitrospira	s__unclassified_g__Nitrospira	ASV68541	0	0	0	0	0	0	0	0	0	0	0	0	0	0	0	2	0	0	0	0	0	0	0	0	0	0	0	0	0	0	0	0	0	0	0	0	0	0	0	0	0
d__Bacteria	k__norank_d__Bacteria	p__Bacteroidota	c__Bacteroidia	o__Chitinophagales	f__Saprospiraceae	g__unclassified_f__Saprospiraceae	s__unclassified_f__Saprospiraceae	ASV74017	0	0	0	0	0	0	0	0	0	0	0	0	0	0	0	0	0	0	0	0	0	0	0	0	0	1	0	0	0	0	0	0	0	0	0	0	0	0	0	0	0
d__Bacteria	k__norank_d__Bacteria	p__Proteobacteria	c__Gammaproteobacteria	o__Vibrionales	f__Vibrionaceae	g__Vibrio	s__unclassified_g__Vibrio	ASV69229	0	0	0	0	0	0	0	0	0	0	0	0	0	0	0	2	0	0	0	0	0	0	0	0	0	0	0	0	0	0	0	0	0	0	0	0	0	0	0	0	0
d__Bacteria	k__norank_d__Bacteria	p__Bacteroidota	c__Bacteroidia	o__unclassified_c__Bacteroidia	f__unclassified_c__Bacteroidia	g__unclassified_c__Bacteroidia	s__unclassified_c__Bacteroidia	ASV76359	0	0	0	0	0	0	0	0	0	0	0	0	0	0	0	0	0	0	0	0	0	0	0	0	0	0	0	0	0	0	0	0	0	0	0	0	0	0	0	2	0
d__Bacteria	k__norank_d__Bacteria	p__Proteobacteria	c__Gammaproteobacteria	o__Steroidobacterales	f__Steroidobacteraceae	g__norank_f__Steroidobacteraceae	s__unclassified_g__norank_f__Steroidobacteraceae	ASV69880	0	0	0	0	0	0	0	0	0	0	16	0	0	0	0	0	0	0	0	0	0	0	0	0	0	0	0	0	0	0	0	0	0	0	0	0	0	0	0	0	0
d__Bacteria	k__norank_d__Bacteria	p__Desulfobacterota	c__Desulfuromonadia	o__unclassified_c__Desulfuromonadia	f__unclassified_c__Desulfuromonadia	g__unclassified_c__Desulfuromonadia	s__unclassified_c__Desulfuromonadia	ASV75402	0	0	0	0	0	0	0	0	0	0	0	0	0	0	0	0	0	0	0	0	0	0	0	0	0	0	0	0	0	0	0	0	0	0	0	0	0	0	0	4	0
d__Bacteria	k__norank_d__Bacteria	p__Desulfobacterota	c__Syntrophia	o__Syntrophales	f__norank_o__Syntrophales	g__norank_o__Syntrophales	s__unclassified_g__norank_o__Syntrophales	ASV37661	0	0	0	0	0	0	0	0	0	0	0	1	0	0	0	0	0	0	7	13	6	0	0	0	0	0	0	0	0	0	0	0	0	0	0	0	0	0	0	0	0
d__Bacteria	k__norank_d__Bacteria	p__Planctomycetota	c__unclassified_p__Planctomycetota	o__unclassified_p__Planctomycetota	f__unclassified_p__Planctomycetota	g__unclassified_p__Planctomycetota	s__unclassified_p__Planctomycetota	ASV83847	0	0	0	0	0	0	0	0	0	0	0	0	0	0	0	0	0	0	0	0	0	0	0	0	0	0	0	0	0	0	1	0	0	0	0	0	0	0	0	0	0
d__Bacteria	k__norank_d__Bacteria	p__Desulfobacterota	c__Desulfobulbia	o__Desulfobulbales	f__norank_o__Desulfobulbales	g__norank_o__Desulfobulbales	s__uncultured_bacterium_o__Desulfobulbales	ASV90052	0	0	0	0	0	0	0	0	0	0	0	0	0	0	0	0	0	0	0	0	7	0	0	0	0	0	0	0	0	0	0	0	0	0	0	0	0	0	0	0	0
d__Bacteria	k__norank_d__Bacteria	p__Cyanobacteria	c__Cyanobacteriia	o__Cyanobacteriales	f__Nostocaceae	g__Nostoc_PCC-8976	s__Nostoc_entophytum_MBDU_679	ASV61875	0	0	0	0	0	0	0	0	0	0	0	0	0	2	0	0	0	0	0	0	0	0	0	0	0	0	0	0	0	0	0	0	0	0	0	0	0	0	0	0	0
d__Bacteria	k__norank_d__Bacteria	p__Bacteroidota	c__Bacteroidia	o__unclassified_c__Bacteroidia	f__unclassified_c__Bacteroidia	g__unclassified_c__Bacteroidia	s__unclassified_c__Bacteroidia	ASV40335	0	0	0	0	0	0	0	0	0	0	0	0	0	0	0	0	0	0	0	0	0	0	0	0	0	0	0	0	0	0	0	0	0	0	0	0	0	1	0	0	0
d__Bacteria	k__norank_d__Bacteria	p__Proteobacteria	c__Gammaproteobacteria	o__unclassified_c__Gammaproteobacteria	f__unclassified_c__Gammaproteobacteria	g__unclassified_c__Gammaproteobacteria	s__unclassified_c__Gammaproteobacteria	ASV11232	0	0	0	0	0	0	0	0	0	0	0	0	6	0	0	0	0	0	0	0	0	0	0	0	0	0	0	0	0	0	0	0	0	0	0	0	0	0	0	0	0
d__Bacteria	k__norank_d__Bacteria	p__Proteobacteria	c__Alphaproteobacteria	o__Sphingomonadales	f__Sphingomonadaceae	g__unclassified_f__Sphingomonadaceae	s__unclassified_f__Sphingomonadaceae	ASV40775	0	0	0	0	0	0	0	0	0	0	0	0	0	0	0	0	0	0	0	0	0	0	0	0	0	0	0	0	0	0	0	0	0	0	0	0	0	1	0	0	0
d__Bacteria	k__norank_d__Bacteria	p__Proteobacteria	c__Alphaproteobacteria	o__Rhodobacterales	f__Rhodobacteraceae	g__unclassified_f__Rhodobacteraceae	s__unclassified_f__Rhodobacteraceae	ASV72637	0	0	0	0	0	0	0	0	0	0	0	0	0	0	0	0	0	0	0	0	0	0	0	0	0	6	0	0	0	0	0	0	0	0	0	0	0	0	0	0	0
d__Bacteria	k__norank_d__Bacteria	p__Bacteroidota	c__Bacteroidia	o__Bacteroidetes_VC2.1_Bac22	f__norank_o__Bacteroidetes_VC2.1_Bac22	g__norank_o__Bacteroidetes_VC2.1_Bac22	s__unclassified_g__norank_o__Bacteroidetes_VC2.1_Bac22	ASV39270	0	0	0	0	0	0	0	0	0	0	0	0	0	0	0	0	0	0	2	0	0	0	0	0	0	0	0	0	0	0	0	0	0	0	0	0	0	0	0	0	0
d__Bacteria	k__norank_d__Bacteria	p__Proteobacteria	c__Alphaproteobacteria	o__Rhizobiales	f__Rhizobiales_Incertae_Sedis	g__norank_f__Rhizobiales_Incertae_Sedis	s__unclassified_g__norank_f__Rhizobiales_Incertae_Sedis	ASV98497	0	0	0	0	0	0	0	0	0	0	0	0	0	0	0	0	24	0	0	0	0	0	0	0	0	0	0	0	0	0	0	0	0	0	0	0	0	0	0	0	0
d__Bacteria	k__norank_d__Bacteria	p__unclassified_k__norank_d__Bacteria	c__unclassified_k__norank_d__Bacteria	o__unclassified_k__norank_d__Bacteria	f__unclassified_k__norank_d__Bacteria	g__unclassified_k__norank_d__Bacteria	s__unclassified_k__norank_d__Bacteria	ASV52419	2	0	0	0	0	0	0	0	0	0	0	0	0	0	0	0	0	0	0	0	0	0	0	0	0	0	0	0	0	0	0	0	0	0	0	0	0	0	0	0	0
d__Bacteria	k__norank_d__Bacteria	p__Proteobacteria	c__Gammaproteobacteria	o__unclassified_c__Gammaproteobacteria	f__unclassified_c__Gammaproteobacteria	g__unclassified_c__Gammaproteobacteria	s__unclassified_c__Gammaproteobacteria	ASV65728	0	0	2	0	0	0	0	0	0	0	0	0	0	0	0	0	0	0	0	0	0	0	0	0	0	0	0	0	0	0	0	0	0	0	0	0	0	0	0	0	0
d__Bacteria	k__norank_d__Bacteria	p__Bacteroidota	c__Bacteroidia	o__Flavobacteriales	f__Flavobacteriaceae	g__Maribacter	s__unclassified_g__Maribacter	ASV91513	0	0	0	0	0	0	0	0	0	0	0	0	0	0	0	0	0	0	0	0	2	0	0	0	0	0	0	0	0	0	0	0	0	0	0	0	0	0	0	0	0
d__Bacteria	k__norank_d__Bacteria	p__Myxococcota	c__Myxococcia	o__Myxococcales	f__Myxococcaceae	g__P3OB-42	s__uncultured_bacterium_g__P3OB-42	ASV20826	0	0	0	0	0	0	0	0	0	0	0	0	0	0	0	0	0	0	0	0	0	0	0	0	0	0	0	0	0	0	0	0	0	0	2	0	0	0	0	0	0
d__Bacteria	k__norank_d__Bacteria	p__Bacteroidota	c__Bacteroidia	o__unclassified_c__Bacteroidia	f__unclassified_c__Bacteroidia	g__unclassified_c__Bacteroidia	s__unclassified_c__Bacteroidia	ASV28725	0	0	0	0	0	0	0	0	0	0	0	0	0	0	0	0	0	0	0	0	0	0	0	0	0	0	0	0	0	0	0	0	0	2	0	0	0	0	0	0	0
d__Bacteria	k__norank_d__Bacteria	p__Deinococcota	c__Deinococci	o__Deinococcales	f__Trueperaceae	g__Truepera	s__uncultured_bacterium_g__Truepera	ASV38688	0	0	0	0	0	0	0	0	0	0	0	0	0	0	0	0	0	0	2	0	0	0	0	0	0	0	0	0	0	0	0	0	0	0	0	0	0	0	0	0	0
d__Bacteria	k__norank_d__Bacteria	p__Acidobacteriota	c__Subgroup_22	o__norank_c__Subgroup_22	f__norank_c__Subgroup_22	g__norank_c__Subgroup_22	s__uncultured_bacterium_c__Subgroup_22	ASV98261	0	0	0	0	0	0	0	0	0	0	0	0	0	0	0	0	0	0	0	0	0	0	0	0	2	0	0	0	0	0	0	0	0	0	0	0	0	0	0	0	0
d__Bacteria	k__norank_d__Bacteria	p__Gemmatimonadota	c__PAUC43f_marine_benthic_group	o__norank_c__PAUC43f_marine_benthic_group	f__norank_c__PAUC43f_marine_benthic_group	g__norank_c__PAUC43f_marine_benthic_group	s__saltmarsh_clone_LCP-68	ASV7457	0	0	0	0	0	0	0	0	0	0	0	0	0	0	0	0	0	0	0	0	0	24	48	58	31	23	28	19	34	28	19	17	25	17	48	24	40	30	23	0	0
d__Bacteria	k__norank_d__Bacteria	p__Zixibacteria	c__norank_p__Zixibacteria	o__norank_p__Zixibacteria	f__norank_p__Zixibacteria	g__norank_p__Zixibacteria	s__uncultured_bacterium_p__Zixibacteria	ASV32164	0	0	0	0	0	0	0	0	0	0	0	0	0	0	0	0	0	0	0	0	0	0	0	0	0	0	0	0	0	0	0	0	0	0	0	0	1	0	0	0	0
d__Bacteria	k__norank_d__Bacteria	p__Patescibacteria	c__Gracilibacteria	o__norank_c__Gracilibacteria	f__norank_c__Gracilibacteria	g__norank_c__Gracilibacteria	s__unclassified_g__norank_c__Gracilibacteria	ASV31415	0	0	0	0	0	0	0	0	0	0	0	0	0	0	0	0	0	0	0	0	0	0	0	0	0	0	0	0	0	0	0	0	0	0	0	0	3	0	0	0	0
d__Bacteria	k__norank_d__Bacteria	p__Actinobacteriota	c__Acidimicrobiia	o__Microtrichales	f__norank_o__Microtrichales	g__norank_o__Microtrichales	s__unclassified_g__norank_o__Microtrichales	ASV34914	0	0	0	0	0	0	0	0	0	0	0	0	0	0	0	0	0	0	0	0	0	0	0	0	0	0	0	0	0	0	0	0	0	0	0	0	0	0	0	0	0
d__Bacteria	k__norank_d__Bacteria	p__Proteobacteria	c__Gammaproteobacteria	o__Cellvibrionales	f__Microbulbiferaceae	g__Microbulbifer	s__Microbulbifer_okinawensis	ASV729	12	8	0	0	0	0	20	10	9	17	0	18	0	0	0	0	0	0	0	0	0	0	0	0	0	0	0	0	0	0	0	0	0	0	0	0	0	0	0	0	7
d__Bacteria	k__norank_d__Bacteria	p__Chloroflexi	c__unclassified_p__Chloroflexi	o__unclassified_p__Chloroflexi	f__unclassified_p__Chloroflexi	g__unclassified_p__Chloroflexi	s__unclassified_p__Chloroflexi	ASV68268	0	0	0	0	0	0	0	0	0	0	0	0	0	0	0	3	0	0	0	0	0	0	0	0	0	0	0	0	0	0	0	0	0	0	0	0	0	0	0	0	0
d__Bacteria	k__norank_d__Bacteria	p__Proteobacteria	c__Gammaproteobacteria	o__Gammaproteobacteria_Incertae_Sedis	f__unclassified_o__Gammaproteobacteria_Incertae_Sedis	g__norank_f__unclassified_o__Gammaproteobacteria_Incertae_Sedis	s__unclassified_g__norank_f__unclassified_o__Gammaproteobacteria_Incertae_Sedis	ASV81621	0	0	0	0	0	0	0	0	0	0	0	0	0	0	0	0	0	0	0	0	0	0	0	0	0	0	0	0	0	1	0	0	0	0	0	0	0	0	0	0	0
d__Bacteria	k__norank_d__Bacteria	p__Proteobacteria	c__Gammaproteobacteria	o__unclassified_c__Gammaproteobacteria	f__unclassified_c__Gammaproteobacteria	g__unclassified_c__Gammaproteobacteria	s__unclassified_c__Gammaproteobacteria	ASV34871	0	0	0	0	0	0	0	0	0	0	0	0	0	0	0	0	0	0	0	0	0	0	0	0	0	0	0	0	0	0	0	0	0	0	0	0	0	0	0	0	0
d__Bacteria	k__norank_d__Bacteria	p__Bacteroidota	c__Bacteroidia	o__Bacteroidales	f__Marinilabiliaceae	g__Carboxylicivirga	s__Carboxylicivirga_sediminis	ASV48951	0	0	0	0	0	0	0	0	0	8	0	0	0	0	0	0	0	0	0	0	0	0	0	0	0	0	0	0	0	0	0	0	0	0	0	0	0	0	0	0	0
d__Bacteria	k__norank_d__Bacteria	p__Proteobacteria	c__Alphaproteobacteria	o__unclassified_c__Alphaproteobacteria	f__unclassified_c__Alphaproteobacteria	g__unclassified_c__Alphaproteobacteria	s__unclassified_c__Alphaproteobacteria	ASV90173	0	0	0	0	0	0	0	0	0	0	0	0	0	0	0	0	0	0	0	0	5	0	0	0	0	0	0	0	0	0	0	0	0	0	0	0	0	0	0	0	0
d__Bacteria	k__norank_d__Bacteria	p__Chloroflexi	c__Chloroflexia	o__Thermomicrobiales	f__JG30-KF-CM45	g__norank_f__JG30-KF-CM45	s__unclassified_g__norank_f__JG30-KF-CM45	ASV257	0	0	0	0	0	0	0	0	0	0	0	0	0	0	6	0	0	0	0	0	0	0	0	0	0	0	0	0	0	0	0	0	0	0	0	0	0	0	0	0	0
d__Bacteria	k__norank_d__Bacteria	p__Firmicutes	c__Clostridia	o__Lachnospirales	f__unclassified_o__Lachnospirales	g__unclassified_o__Lachnospirales	s__unclassified_o__Lachnospirales	ASV80057	0	0	0	0	0	0	0	0	0	0	0	0	0	0	0	0	0	0	0	0	0	0	0	0	0	0	0	0	0	7	0	0	0	0	0	0	0	0	0	0	0
d__Bacteria	k__norank_d__Bacteria	p__Actinobacteriota	c__Acidimicrobiia	o__unclassified_c__Acidimicrobiia	f__unclassified_c__Acidimicrobiia	g__unclassified_c__Acidimicrobiia	s__unclassified_c__Acidimicrobiia	ASV8827	0	0	0	0	0	0	0	0	0	0	0	0	0	0	0	0	0	0	0	0	0	0	0	0	0	4	0	0	3	0	0	0	0	0	0	0	0	1	0	0	0
d__Bacteria	k__norank_d__Bacteria	p__Proteobacteria	c__Alphaproteobacteria	o__Tistrellales	f__Geminicoccaceae	g__Candidatus_Alysiosphaera	s__unclassified_g__Candidatus_Alysiosphaera	ASV61457	0	0	0	0	0	0	0	0	0	0	0	0	0	1	0	0	0	0	0	0	0	0	0	0	0	0	0	0	0	0	0	0	0	0	0	0	0	0	0	0	0
d__Bacteria	k__norank_d__Bacteria	p__unclassified_k__norank_d__Bacteria	c__unclassified_k__norank_d__Bacteria	o__unclassified_k__norank_d__Bacteria	f__unclassified_k__norank_d__Bacteria	g__unclassified_k__norank_d__Bacteria	s__unclassified_k__norank_d__Bacteria	ASV18729	0	0	0	0	0	0	0	0	0	0	0	0	0	0	0	0	0	0	0	0	0	0	0	0	0	0	2	0	0	0	0	0	0	0	0	0	0	0	0	0	0
d__Bacteria	k__norank_d__Bacteria	p__Chloroflexi	c__Anaerolineae	o__Anaerolineales	f__Anaerolineaceae	g__norank_f__Anaerolineaceae	s__unclassified_g__norank_f__Anaerolineaceae	ASV47556	0	0	0	0	8	3	0	0	8	0	0	0	0	0	0	0	0	0	0	0	0	0	0	0	0	0	0	0	0	0	0	0	0	0	0	0	0	0	0	0	0
d__Bacteria	k__norank_d__Bacteria	p__Acidobacteriota	c__AT-s3-28	o__norank_c__AT-s3-28	f__norank_c__AT-s3-28	g__norank_c__AT-s3-28	s__uncultured_bacterium_c__AT-s3-28	ASV54736	0	0	0	0	0	0	0	0	0	0	0	0	0	0	0	0	0	0	0	0	0	0	0	0	0	0	0	0	0	0	0	0	0	0	0	0	0	0	0	0	0
d__Bacteria	k__norank_d__Bacteria	p__Dependentiae	c__Babeliae	o__Babeliales	f__Vermiphilaceae	g__norank_f__Vermiphilaceae	s__uncultured_bacterium_f__Vermiphilaceae	ASV68959	0	0	0	0	0	0	0	0	0	0	0	0	0	0	0	1	0	0	0	0	0	0	0	0	0	0	0	0	0	0	0	0	0	0	0	0	0	0	0	0	0
d__Bacteria	k__norank_d__Bacteria	p__Proteobacteria	c__Gammaproteobacteria	o__pItb-vmat-80	f__norank_o__pItb-vmat-80	g__norank_o__pItb-vmat-80	s__uncultured_bacterium_o__pItb-vmat-80	ASV11122	0	0	0	0	0	0	0	0	0	0	0	0	6	0	0	0	0	0	0	0	0	0	0	0	0	0	0	0	0	0	0	0	0	0	0	0	0	0	0	0	0
d__Bacteria	k__norank_d__Bacteria	p__Actinobacteriota	c__Thermoleophilia	o__Gaiellales	f__norank_o__Gaiellales	g__norank_o__Gaiellales	s__unclassified_g__norank_o__Gaiellales	ASV61298	0	0	0	0	0	0	0	0	0	0	0	0	0	3	0	0	0	0	0	0	0	0	0	0	0	0	0	0	0	0	0	0	0	0	0	0	0	0	0	0	0
d__Bacteria	k__norank_d__Bacteria	p__Proteobacteria	c__Alphaproteobacteria	o__unclassified_c__Alphaproteobacteria	f__unclassified_c__Alphaproteobacteria	g__unclassified_c__Alphaproteobacteria	s__unclassified_c__Alphaproteobacteria	ASV40422	0	0	0	0	0	0	0	0	0	0	0	0	0	0	0	0	0	0	0	0	0	0	0	0	0	0	0	0	0	0	0	0	0	0	0	0	0	3	0	0	0
d__Bacteria	k__norank_d__Bacteria	p__Chloroflexi	c__Chloroflexia	o__Chloroflexales	f__Roseiflexaceae	g__norank_f__Roseiflexaceae	s__unclassified_g__norank_f__Roseiflexaceae	ASV85190	0	0	0	0	0	0	0	0	0	0	0	0	0	0	0	0	0	0	0	0	0	0	0	0	0	0	0	0	0	0	0	0	0	0	0	0	0	0	0	0	0
d__Bacteria	k__norank_d__Bacteria	p__Proteobacteria	c__Gammaproteobacteria	o__unclassified_c__Gammaproteobacteria	f__unclassified_c__Gammaproteobacteria	g__unclassified_c__Gammaproteobacteria	s__unclassified_c__Gammaproteobacteria	ASV8516	0	0	0	0	0	0	0	0	0	0	0	0	0	0	0	0	0	0	0	0	0	0	0	0	0	0	0	0	2	0	0	0	0	0	0	0	0	0	0	0	0
d__Bacteria	k__norank_d__Bacteria	p__Proteobacteria	c__Alphaproteobacteria	o__Caulobacterales	f__Hyphomonadaceae	g__SWB02	s__uncultured_bacterium_g__SWB02	ASV22312	0	0	0	0	0	0	0	0	0	0	0	0	0	0	0	0	0	5	0	0	0	0	0	0	0	0	0	0	0	0	0	0	0	0	0	0	0	0	0	0	0
d__Bacteria	k__norank_d__Bacteria	p__Proteobacteria	c__Alphaproteobacteria	o__unclassified_c__Alphaproteobacteria	f__unclassified_c__Alphaproteobacteria	g__unclassified_c__Alphaproteobacteria	s__unclassified_c__Alphaproteobacteria	ASV95379	0	0	0	0	0	0	0	0	0	0	0	0	0	0	0	0	0	0	0	0	0	0	0	0	0	0	0	0	0	0	0	0	0	0	0	0	0	0	0	0	0
d__Bacteria	k__norank_d__Bacteria	p__Desulfobacterota	c__norank_p__Desulfobacterota	o__norank_p__Desulfobacterota	f__norank_p__Desulfobacterota	g__norank_p__Desulfobacterota	s__uncultured_Dongia_sp.	ASV47731	9	0	4	0	0	0	0	0	4	0	0	0	0	0	0	0	0	0	0	0	0	0	0	0	0	0	0	0	0	0	0	0	0	0	0	0	0	0	0	0	0
d__Bacteria	k__norank_d__Bacteria	p__Dependentiae	c__Babeliae	o__Babeliales	f__Vermiphilaceae	g__norank_f__Vermiphilaceae	s__unclassified_g__norank_f__Vermiphilaceae	ASV51227	0	0	0	0	2	0	0	0	0	0	0	0	0	0	0	0	0	0	0	0	0	0	0	0	0	0	0	0	0	0	0	0	0	0	0	0	0	0	0	0	0
d__Bacteria	k__norank_d__Bacteria	p__Bacteroidota	c__Bacteroidia	o__Flavobacteriales	f__Flavobacteriaceae	g__unclassified_f__Flavobacteriaceae	s__unclassified_f__Flavobacteriaceae	ASV35395	0	0	0	0	0	0	0	0	0	0	0	0	0	0	0	0	0	0	0	0	0	0	0	0	0	0	0	0	0	0	0	0	0	0	0	0	0	0	0	0	0
d__Bacteria	k__norank_d__Bacteria	p__Bacteroidota	c__Ignavibacteria	o__Ignavibacteriales	f__Melioribacteraceae	g__IheB3-7	s__uncultured_bacterium_g__IheB3-7	ASV28997	0	0	0	0	0	0	0	0	0	0	0	0	0	0	0	0	0	0	0	0	0	0	0	0	0	0	0	0	0	0	4	0	0	2	0	0	3	0	0	0	0
d__Bacteria	k__norank_d__Bacteria	p__Proteobacteria	c__Alphaproteobacteria	o__unclassified_c__Alphaproteobacteria	f__unclassified_c__Alphaproteobacteria	g__unclassified_c__Alphaproteobacteria	s__unclassified_c__Alphaproteobacteria	ASV101057	0	0	0	0	0	0	0	0	0	0	0	0	0	0	0	0	2	0	0	0	0	0	0	0	0	0	0	0	0	0	0	0	0	0	0	0	0	0	0	0	0
d__Bacteria	k__norank_d__Bacteria	p__Proteobacteria	c__Gammaproteobacteria	o__Burkholderiales	f__Comamonadaceae	g__unclassified_f__Comamonadaceae	s__unclassified_f__Comamonadaceae	ASV43682	0	0	0	0	0	0	5	0	0	0	0	0	0	0	0	0	0	0	0	0	0	0	0	0	0	0	0	0	0	0	0	0	0	0	0	0	0	0	0	0	0
d__Bacteria	k__norank_d__Bacteria	p__Firmicutes	c__Clostridia	o__Clostridiales	f__Clostridiaceae	g__unclassified_f__Clostridiaceae	s__unclassified_f__Clostridiaceae	ASV96947	0	0	0	0	0	0	0	0	0	0	0	0	0	0	0	0	0	0	0	0	0	0	0	0	0	0	0	0	0	0	0	0	0	0	0	0	0	0	0	0	2
d__Bacteria	k__norank_d__Bacteria	p__Bacteroidota	c__Bacteroidia	o__Bacteroidales	f__unclassified_o__Bacteroidales	g__unclassified_o__Bacteroidales	s__unclassified_o__Bacteroidales	ASV50941	0	7	0	0	4	0	0	0	0	0	0	0	0	0	0	0	0	0	0	0	0	0	0	0	0	0	0	0	0	0	0	0	0	0	0	0	0	0	0	0	0
d__Bacteria	k__norank_d__Bacteria	p__Myxococcota	c__unclassified_p__Myxococcota	o__unclassified_p__Myxococcota	f__unclassified_p__Myxococcota	g__unclassified_p__Myxococcota	s__unclassified_p__Myxococcota	ASV61509	0	0	0	0	0	0	0	0	0	0	0	0	0	3	0	0	0	0	0	0	0	0	0	0	0	0	0	0	0	0	0	0	0	0	0	0	0	0	0	0	0
d__Bacteria	k__norank_d__Bacteria	p__unclassified_k__norank_d__Bacteria	c__unclassified_k__norank_d__Bacteria	o__unclassified_k__norank_d__Bacteria	f__unclassified_k__norank_d__Bacteria	g__unclassified_k__norank_d__Bacteria	s__unclassified_k__norank_d__Bacteria	ASV46252	0	0	0	1	0	0	0	0	0	0	0	0	0	0	0	0	0	0	0	0	0	0	0	0	0	0	0	0	0	0	0	0	0	0	0	0	0	0	0	0	0
d__Bacteria	k__norank_d__Bacteria	p__Bacteroidota	c__Bacteroidia	o__Cytophagales	f__Cyclobacteriaceae	g__Fulvivirga	s__unclassified_g__Fulvivirga	ASV67277	0	0	0	0	0	0	0	0	0	0	0	0	0	0	0	10	0	0	0	0	0	0	0	0	0	0	0	0	0	0	0	0	0	0	0	0	0	0	0	0	0
d__Bacteria	k__norank_d__Bacteria	p__Proteobacteria	c__Gammaproteobacteria	o__unclassified_c__Gammaproteobacteria	f__unclassified_c__Gammaproteobacteria	g__unclassified_c__Gammaproteobacteria	s__unclassified_c__Gammaproteobacteria	ASV91425	0	0	0	0	0	0	0	0	0	0	0	0	0	0	0	0	0	0	0	0	2	0	0	0	0	0	0	0	0	0	0	0	0	0	0	0	0	0	0	0	0
d__Bacteria	k__norank_d__Bacteria	p__Cyanobacteria	c__Cyanobacteriia	o__Synechococcales	f__Cyanobiaceae	g__Cyanobium_PCC-6307	s__unclassified_g__Cyanobium_PCC-6307	ASV8012	0	0	0	0	0	0	0	0	0	0	0	0	0	0	0	10	37	21	98	9	0	13	0	0	0	0	7	11	9	14	0	0	0	0	0	0	0	0	5	0	0
d__Bacteria	k__norank_d__Bacteria	p__Proteobacteria	c__Gammaproteobacteria	o__unclassified_c__Gammaproteobacteria	f__unclassified_c__Gammaproteobacteria	g__unclassified_c__Gammaproteobacteria	s__unclassified_c__Gammaproteobacteria	ASV46956	0	0	0	2	0	0	0	0	0	0	0	0	0	0	0	0	0	0	0	0	0	0	0	0	0	0	0	0	0	0	0	0	0	0	0	0	0	0	0	0	0
d__Bacteria	k__norank_d__Bacteria	p__Desulfobacterota	c__Desulfobulbia	o__Desulfobulbales	f__Desulfobulbaceae	g__norank_f__Desulfobulbaceae	s__uncultured_delta_proteobacterium_f__Desulfobulbaceae	ASV4898	0	0	0	0	0	0	0	0	0	0	0	0	0	0	3	0	0	0	0	0	0	0	0	0	0	0	0	0	0	0	0	0	0	0	0	0	0	0	0	0	0
d__Bacteria	k__norank_d__Bacteria	p__Gemmatimonadota	c__BD2-11_terrestrial_group	o__norank_c__BD2-11_terrestrial_group	f__norank_c__BD2-11_terrestrial_group	g__norank_c__BD2-11_terrestrial_group	s__unclassified_g__norank_c__BD2-11_terrestrial_group	ASV31411	0	0	0	0	0	0	0	0	0	0	0	0	0	0	0	0	0	0	0	0	0	0	0	0	0	0	0	0	0	0	0	0	0	0	0	0	4	0	0	0	0
d__Bacteria	k__norank_d__Bacteria	p__unclassified_k__norank_d__Bacteria	c__unclassified_k__norank_d__Bacteria	o__unclassified_k__norank_d__Bacteria	f__unclassified_k__norank_d__Bacteria	g__unclassified_k__norank_d__Bacteria	s__unclassified_k__norank_d__Bacteria	ASV100804	0	0	0	0	0	0	0	0	0	0	0	0	0	0	0	0	2	0	0	0	0	0	0	0	0	0	0	0	0	0	0	0	0	0	0	0	0	0	0	0	0
d__Bacteria	k__norank_d__Bacteria	p__Spirochaetota	c__Leptospirae	o__Leptospirales	f__Leptospiraceae	g__RBG-16-49-21	s__unclassified_g__RBG-16-49-21	ASV29796	0	0	0	0	0	0	0	0	0	0	0	0	0	0	0	0	0	0	0	0	0	0	3	0	0	0	0	0	0	0	0	0	0	0	0	0	0	0	0	0	0
d__Bacteria	k__norank_d__Bacteria	p__unclassified_k__norank_d__Bacteria	c__unclassified_k__norank_d__Bacteria	o__unclassified_k__norank_d__Bacteria	f__unclassified_k__norank_d__Bacteria	g__unclassified_k__norank_d__Bacteria	s__unclassified_k__norank_d__Bacteria	ASV66487	0	0	2	0	0	0	0	0	0	0	0	0	0	0	0	0	0	0	0	0	0	0	0	0	0	0	0	0	0	0	0	0	0	0	0	0	0	0	0	0	0
d__Bacteria	k__norank_d__Bacteria	p__Bacteroidota	c__Bacteroidia	o__Cytophagales	f__Cyclobacteriaceae	g__Fulvivirga	s__uncultured_Bacteroidetes_bacterium_g__Fulvivirga	ASV7295	0	0	0	0	0	0	0	0	0	0	0	0	0	0	0	0	0	0	0	0	0	27	31	22	31	33	36	44	71	48	112	133	72	79	162	114	54	66	53	0	0
d__Bacteria	k__norank_d__Bacteria	p__Firmicutes	c__Clostridia	o__Oscillospirales	f__Oscillospiraceae	g__unclassified_f__Oscillospiraceae	s__unclassified_f__Oscillospiraceae	ASV50937	0	0	0	0	2	0	0	0	0	0	0	0	0	0	0	0	0	0	0	0	0	0	0	0	0	0	0	0	0	0	0	0	0	0	0	0	0	0	0	0	0
d__Bacteria	k__norank_d__Bacteria	p__Proteobacteria	c__Gammaproteobacteria	o__Cellvibrionales	f__Halieaceae	g__Haliea	s__uncultured_organism_g__Haliea	ASV60866	0	0	0	0	0	0	0	0	0	0	5	0	0	7	0	0	0	0	0	0	0	0	0	0	0	0	0	0	0	0	0	0	0	0	0	0	0	0	0	0	0
d__Bacteria	k__norank_d__Bacteria	p__Proteobacteria	c__Gammaproteobacteria	o__Gammaproteobacteria_Incertae_Sedis	f__unclassified_o__Gammaproteobacteria_Incertae_Sedis	g__Candidatus_Ovatusbacter	s__unclassified_g__Candidatus_Ovatusbacter	ASV74669	0	0	0	0	0	6	0	0	0	0	0	0	0	0	0	0	0	0	0	0	0	0	0	0	0	0	0	0	0	0	0	0	0	0	0	0	0	0	0	0	0
d__Bacteria	k__norank_d__Bacteria	p__Desulfobacterota	c__Desulfobulbia	o__Desulfobulbales	f__Desulfocapsaceae	g__norank_f__Desulfocapsaceae	s__unclassified_g__norank_f__Desulfocapsaceae	ASV16533	0	0	0	0	0	0	0	0	0	0	0	3	0	0	0	0	0	0	0	0	0	0	0	0	12	0	7	0	0	0	0	0	0	0	0	0	0	0	0	0	0
d__Bacteria	k__norank_d__Bacteria	p__Proteobacteria	c__Alphaproteobacteria	o__unclassified_c__Alphaproteobacteria	f__unclassified_c__Alphaproteobacteria	g__unclassified_c__Alphaproteobacteria	s__unclassified_c__Alphaproteobacteria	ASV79203	0	0	0	0	0	0	0	0	0	0	0	0	0	0	0	0	0	0	0	0	0	0	0	0	0	0	0	0	0	0	0	2	0	0	0	0	0	0	0	0	0
d__Bacteria	k__norank_d__Bacteria	p__Acidobacteriota	c__Thermoanaerobaculia	o__Thermoanaerobaculales	f__Thermoanaerobaculaceae	g__Subgroup_23	s__uncultured_bacterium_g__Subgroup_23	ASV21207	0	0	0	0	0	0	0	0	0	0	0	0	0	0	0	0	0	0	0	0	0	0	0	0	0	0	0	0	0	0	0	0	0	0	2	0	0	0	0	0	0
d__Bacteria	k__norank_d__Bacteria	p__unclassified_k__norank_d__Bacteria	c__unclassified_k__norank_d__Bacteria	o__unclassified_k__norank_d__Bacteria	f__unclassified_k__norank_d__Bacteria	g__unclassified_k__norank_d__Bacteria	s__unclassified_k__norank_d__Bacteria	ASV68845	0	0	0	0	0	0	0	0	0	0	0	0	0	0	0	2	0	0	0	0	0	0	0	0	0	0	0	0	0	0	0	0	0	0	0	0	0	0	0	0	0
d__Bacteria	k__norank_d__Bacteria	p__Proteobacteria	c__Gammaproteobacteria	o__Oceanospirillales	f__Endozoicomonadaceae	g__Zooshikella	s__Zooshikella_ganghwensis	ASV18162	0	0	0	0	0	0	0	0	0	0	0	0	0	0	0	0	0	0	0	0	0	0	0	0	0	0	2	0	0	0	0	0	0	0	0	0	0	0	0	0	0
d__Bacteria	k__norank_d__Bacteria	p__Actinobacteriota	c__Rubrobacteria	o__Rubrobacterales	f__Rubrobacteriaceae	g__Rubrobacter	s__unclassified_g__Rubrobacter	ASV70969	0	0	0	0	0	0	0	0	0	0	2	0	0	0	0	0	0	0	0	0	0	0	0	0	0	0	0	0	0	0	0	0	0	0	0	0	0	0	0	0	0
d__Bacteria	k__norank_d__Bacteria	p__Proteobacteria	c__Gammaproteobacteria	o__unclassified_c__Gammaproteobacteria	f__unclassified_c__Gammaproteobacteria	g__unclassified_c__Gammaproteobacteria	s__unclassified_c__Gammaproteobacteria	ASV13999	49	55	37	42	0	55	0	33	25	0	0	0	0	0	0	0	0	0	0	0	0	0	0	0	0	0	0	0	0	0	0	0	0	0	0	0	0	0	0	0	0
d__Bacteria	k__norank_d__Bacteria	p__Patescibacteria	c__Gracilibacteria	o__norank_c__Gracilibacteria	f__norank_c__Gracilibacteria	g__norank_c__Gracilibacteria	s__uncultured_bacterium_c__Gracilibacteria	ASV75024	0	0	0	0	0	2	0	0	0	0	0	0	0	0	0	0	0	0	0	0	0	0	0	0	0	0	0	0	0	0	0	0	0	0	0	0	0	0	0	0	0
d__Bacteria	k__norank_d__Bacteria	p__unclassified_k__norank_d__Bacteria	c__unclassified_k__norank_d__Bacteria	o__unclassified_k__norank_d__Bacteria	f__unclassified_k__norank_d__Bacteria	g__unclassified_k__norank_d__Bacteria	s__unclassified_k__norank_d__Bacteria	ASV83746	0	0	0	0	0	0	0	0	0	0	0	0	0	0	0	0	0	0	0	0	0	0	0	0	0	0	0	0	0	0	3	0	0	0	0	0	0	0	0	0	0
d__Bacteria	k__norank_d__Bacteria	p__Proteobacteria	c__Gammaproteobacteria	o__unclassified_c__Gammaproteobacteria	f__unclassified_c__Gammaproteobacteria	g__unclassified_c__Gammaproteobacteria	s__unclassified_c__Gammaproteobacteria	ASV6671	0	0	0	0	0	0	0	0	0	0	0	0	0	0	2	0	0	0	0	0	0	0	0	0	0	0	0	0	0	0	0	0	0	0	0	0	0	0	0	0	0
d__Bacteria	k__norank_d__Bacteria	p__Chloroflexi	c__Anaerolineae	o__SBR1031	f__norank_o__SBR1031	g__norank_o__SBR1031	s__uncultured_bacterium_o__SBR1031	ASV44892	9	19	0	13	7	0	0	0	0	0	0	0	0	0	0	0	0	0	0	0	0	0	0	0	0	0	0	0	0	0	0	0	0	0	0	0	0	0	0	0	0
d__Bacteria	k__norank_d__Bacteria	p__unclassified_k__norank_d__Bacteria	c__unclassified_k__norank_d__Bacteria	o__unclassified_k__norank_d__Bacteria	f__unclassified_k__norank_d__Bacteria	g__unclassified_k__norank_d__Bacteria	s__unclassified_k__norank_d__Bacteria	ASV72232	0	0	0	0	0	0	0	0	0	0	1	0	0	0	0	0	0	0	0	0	0	0	0	0	0	0	0	0	0	0	0	0	0	0	0	0	0	0	0	0	0
d__Bacteria	k__norank_d__Bacteria	p__Desulfobacterota	c__Desulfobacteria	o__Desulfobacterales	f__Desulfosarcinaceae	g__SEEP-SRB1	s__unclassified_g__SEEP-SRB1	ASV78055	0	0	0	0	0	0	0	0	0	0	0	0	0	0	0	0	0	0	0	0	0	0	0	0	0	0	0	0	0	0	0	9	0	0	0	0	0	0	0	0	0
d__Bacteria	k__norank_d__Bacteria	p__Myxococcota	c__Polyangia	o__unclassified_c__Polyangia	f__unclassified_c__Polyangia	g__unclassified_c__Polyangia	s__unclassified_c__Polyangia	ASV58571	0	0	0	0	0	0	0	0	0	0	0	0	0	0	0	0	0	0	0	0	0	0	0	0	0	0	0	0	0	0	0	0	2	0	0	0	0	0	0	0	0
d__Bacteria	k__norank_d__Bacteria	p__Firmicutes	c__Clostridia	o__norank_c__Clostridia	f__Hungateiclostridiaceae	g__unclassified_f__Hungateiclostridiaceae	s__unclassified_f__Hungateiclostridiaceae	ASV45281	0	0	0	4	0	0	0	0	0	0	0	0	0	0	0	0	0	0	0	0	0	0	0	0	0	0	0	0	0	0	0	0	0	0	0	0	0	0	0	0	0
d__Bacteria	k__norank_d__Bacteria	p__Firmicutes	c__Clostridia	o__unclassified_c__Clostridia	f__unclassified_c__Clostridia	g__unclassified_c__Clostridia	s__unclassified_c__Clostridia	ASV79699	0	0	0	0	0	0	0	0	0	0	0	0	0	0	0	0	0	0	0	0	0	0	0	0	0	0	0	0	0	0	0	2	0	0	0	0	0	0	0	0	0
d__Bacteria	k__norank_d__Bacteria	p__Proteobacteria	c__Alphaproteobacteria	o__unclassified_c__Alphaproteobacteria	f__unclassified_c__Alphaproteobacteria	g__unclassified_c__Alphaproteobacteria	s__unclassified_c__Alphaproteobacteria	ASV18148	0	0	0	0	0	0	0	0	0	0	0	0	0	0	0	0	0	0	0	0	0	0	0	0	0	0	1	0	0	0	0	0	0	0	0	0	0	0	0	0	0
d__Bacteria	k__norank_d__Bacteria	p__Chloroflexi	c__KD4-96	o__norank_c__KD4-96	f__norank_c__KD4-96	g__norank_c__KD4-96	s__unclassified_g__norank_c__KD4-96	ASV95695	0	0	0	0	0	0	0	0	0	0	0	0	0	0	0	0	0	0	0	0	0	0	0	0	0	0	0	0	0	0	0	0	0	0	0	0	0	0	0	0	21
d__Bacteria	k__norank_d__Bacteria	p__Verrucomicrobiota	c__Kiritimatiellae	o__WCHB1-41	f__norank_o__WCHB1-41	g__norank_o__WCHB1-41	s__uncultured_organism_o__WCHB1-41	ASV24258	0	0	0	0	0	0	0	0	0	0	0	0	0	0	0	0	0	2	0	0	0	0	0	0	0	0	0	0	0	0	0	0	0	0	0	0	0	0	0	0	0
d__Bacteria	k__norank_d__Bacteria	p__Acidobacteriota	c__Acidobacteriae	o__Subgroup_15	f__norank_o__Subgroup_15	g__norank_o__Subgroup_15	s__uncultured_bacterium_o__Subgroup_15	ASV14952	0	0	0	0	0	0	0	6	0	0	0	0	0	0	0	0	0	0	0	0	0	0	0	0	0	0	0	0	0	0	0	0	0	0	0	0	0	0	0	0	0
d__Bacteria	k__norank_d__Bacteria	p__Acidobacteriota	c__Subgroup_21	o__norank_c__Subgroup_21	f__norank_c__Subgroup_21	g__norank_c__Subgroup_21	s__uncultured_bacterium_c__Subgroup_21	ASV2506	0	0	0	0	0	0	0	0	0	0	0	0	0	0	0	0	0	0	0	0	0	2	0	3	0	37	9	0	0	0	0	0	0	0	0	0	0	0	0	0	2
d__Bacteria	k__norank_d__Bacteria	p__Proteobacteria	c__Gammaproteobacteria	o__unclassified_c__Gammaproteobacteria	f__unclassified_c__Gammaproteobacteria	g__unclassified_c__Gammaproteobacteria	s__unclassified_c__Gammaproteobacteria	ASV35593	0	0	0	0	0	0	0	0	0	0	0	0	0	0	0	0	0	0	0	0	0	0	0	0	0	0	0	0	0	0	0	0	0	0	0	0	0	0	0	0	0
d__Bacteria	k__norank_d__Bacteria	p__Proteobacteria	c__Alphaproteobacteria	o__Rhizobiales	f__Rhizobiales_Incertae_Sedis	g__Bauldia	s__unclassified_g__Bauldia	ASV45580	0	0	0	4	0	0	0	0	0	0	0	0	0	0	0	0	0	0	0	0	0	0	0	0	0	0	0	0	0	0	0	0	0	0	0	0	0	0	0	0	0
d__Bacteria	k__norank_d__Bacteria	p__Chloroflexi	c__Anaerolineae	o__unclassified_c__Anaerolineae	f__unclassified_c__Anaerolineae	g__unclassified_c__Anaerolineae	s__unclassified_c__Anaerolineae	ASV71773	0	0	0	0	0	0	0	0	0	0	2	0	0	0	0	0	0	0	0	0	0	0	0	0	0	0	0	0	0	0	0	0	0	0	0	0	0	0	0	0	0
d__Bacteria	k__norank_d__Bacteria	p__Proteobacteria	c__Alphaproteobacteria	o__Rhizobiales	f__Rhizobiales_Incertae_Sedis	g__Bauldia	s__unclassified_g__Bauldia	ASV13818	0	0	0	0	0	0	0	0	0	0	0	0	1	0	0	0	0	0	0	0	0	0	0	0	0	0	0	0	0	0	0	0	0	0	0	0	0	0	0	0	0
d__Bacteria	k__norank_d__Bacteria	p__Chloroflexi	c__Anaerolineae	o__unclassified_c__Anaerolineae	f__unclassified_c__Anaerolineae	g__unclassified_c__Anaerolineae	s__unclassified_c__Anaerolineae	ASV81598	0	0	0	0	0	0	0	0	0	0	0	0	0	0	0	0	0	0	0	0	0	0	0	0	0	0	0	0	0	1	0	0	0	0	0	0	0	0	0	0	0
d__Bacteria	k__norank_d__Bacteria	p__unclassified_k__norank_d__Bacteria	c__unclassified_k__norank_d__Bacteria	o__unclassified_k__norank_d__Bacteria	f__unclassified_k__norank_d__Bacteria	g__unclassified_k__norank_d__Bacteria	s__unclassified_k__norank_d__Bacteria	ASV24130	0	0	0	0	0	0	0	0	0	0	0	0	0	0	0	0	0	2	0	0	0	0	0	0	0	0	0	0	0	0	0	0	0	0	0	0	0	0	0	0	0
d__Bacteria	k__norank_d__Bacteria	p__unclassified_k__norank_d__Bacteria	c__unclassified_k__norank_d__Bacteria	o__unclassified_k__norank_d__Bacteria	f__unclassified_k__norank_d__Bacteria	g__unclassified_k__norank_d__Bacteria	s__unclassified_k__norank_d__Bacteria	ASV46508	0	0	0	2	0	0	0	0	0	0	0	0	0	0	0	0	0	0	0	0	0	0	0	0	0	0	0	0	0	0	0	0	0	0	0	0	0	0	0	0	0
d__Bacteria	k__norank_d__Bacteria	p__Acidobacteriota	c__Subgroup_22	o__norank_c__Subgroup_22	f__norank_c__Subgroup_22	g__norank_c__Subgroup_22	s__uncultured_bacterium_c__Subgroup_22	ASV79185	0	0	0	0	0	0	0	0	0	0	0	0	0	0	0	0	0	0	0	0	0	0	0	0	0	0	0	0	0	0	0	1	0	0	0	0	0	0	0	0	0
d__Bacteria	k__norank_d__Bacteria	p__Proteobacteria	c__Gammaproteobacteria	o__Oceanospirillales	f__Hahellaceae	g__Hahella	s__metagenome_g__Hahella	ASV92767	0	0	0	0	0	0	0	0	0	0	0	5	0	0	0	0	0	0	0	0	0	0	0	0	0	0	0	0	0	0	0	0	0	0	0	0	0	0	0	0	0
d__Bacteria	k__norank_d__Bacteria	p__Actinobacteriota	c__Actinobacteria	o__Propionibacteriales	f__Nocardioidaceae	g__Nocardioides	s__unclassified_g__Nocardioides	ASV95956	0	0	0	0	0	0	0	0	0	0	0	0	0	0	0	0	0	0	0	0	0	0	0	0	0	0	0	0	0	0	0	0	0	0	0	0	0	0	0	0	4
d__Bacteria	k__norank_d__Bacteria	p__Proteobacteria	c__Alphaproteobacteria	o__unclassified_c__Alphaproteobacteria	f__unclassified_c__Alphaproteobacteria	g__unclassified_c__Alphaproteobacteria	s__unclassified_c__Alphaproteobacteria	ASV72591	0	0	0	0	0	0	0	0	0	0	0	0	0	0	0	0	0	0	0	0	0	0	0	0	0	6	0	0	0	0	0	0	0	0	0	0	0	0	0	0	0
d__Bacteria	k__norank_d__Bacteria	p__Proteobacteria	c__Gammaproteobacteria	o__unclassified_c__Gammaproteobacteria	f__unclassified_c__Gammaproteobacteria	g__unclassified_c__Gammaproteobacteria	s__unclassified_c__Gammaproteobacteria	ASV59960	0	0	0	0	0	0	0	0	0	0	0	0	0	0	0	0	0	0	0	0	0	0	0	0	0	0	0	0	0	0	0	0	0	0	0	0	0	0	0	0	0
d__Bacteria	k__norank_d__Bacteria	p__Proteobacteria	c__Alphaproteobacteria	o__Rhodobacterales	f__Rhodobacteraceae	g__Silicimonas	s__unclassified_g__Silicimonas	ASV39964	0	0	0	0	0	0	0	0	0	0	0	0	0	0	0	0	0	0	0	0	0	0	0	0	0	0	0	0	0	0	0	0	0	0	0	0	0	5	0	0	0
d__Bacteria	k__norank_d__Bacteria	p__Desulfobacterota	c__Desulfuromonadia	o__norank_c__Desulfuromonadia	f__unclassified_o__norank_c__Desulfuromonadia	g__unclassified_o__norank_c__Desulfuromonadia	s__unclassified_o__norank_c__Desulfuromonadia	ASV99702	0	0	0	0	0	0	0	0	0	0	0	0	0	0	0	0	2	0	0	0	0	0	0	0	0	0	0	0	0	0	0	0	0	0	0	0	0	0	0	0	0
d__Bacteria	k__norank_d__Bacteria	p__unclassified_k__norank_d__Bacteria	c__unclassified_k__norank_d__Bacteria	o__unclassified_k__norank_d__Bacteria	f__unclassified_k__norank_d__Bacteria	g__unclassified_k__norank_d__Bacteria	s__unclassified_k__norank_d__Bacteria	ASV30880	0	0	0	0	0	0	0	0	0	0	0	0	0	0	0	0	0	0	0	0	0	0	2	0	0	0	0	0	0	0	0	0	0	0	0	0	0	0	0	0	0
d__Bacteria	k__norank_d__Bacteria	p__Proteobacteria	c__Alphaproteobacteria	o__unclassified_c__Alphaproteobacteria	f__unclassified_c__Alphaproteobacteria	g__unclassified_c__Alphaproteobacteria	s__unclassified_c__Alphaproteobacteria	ASV24040	0	0	0	0	0	0	0	0	0	0	0	0	0	0	0	0	0	1	0	0	0	0	0	0	0	0	0	0	0	0	0	0	0	0	0	0	0	0	0	0	0
d__Bacteria	k__norank_d__Bacteria	p__Latescibacterota	c__Latescibacteria	o__Latescibacterales	f__Latescibacteraceae	g__norank_f__Latescibacteraceae	s__uncultured_bacterium_f__Latescibacteraceae	ASV4700	0	0	0	0	0	0	0	0	0	0	0	0	0	0	3	0	0	0	0	0	0	0	0	0	0	0	0	0	0	0	0	0	0	0	0	0	0	0	0	0	0
d__Bacteria	k__norank_d__Bacteria	p__Desulfobacterota	c__Desulfuromonadia	o__PB19	f__norank_o__PB19	g__norank_o__PB19	s__unclassified_g__norank_o__PB19	ASV97855	0	0	0	0	0	0	0	0	0	0	0	0	0	0	0	0	0	0	0	0	0	0	0	0	2	0	0	0	0	0	0	0	0	0	0	0	0	0	0	0	0
d__Bacteria	k__norank_d__Bacteria	p__Proteobacteria	c__Alphaproteobacteria	o__Rhodobacterales	f__Rhodobacteraceae	g__unclassified_f__Rhodobacteraceae	s__unclassified_f__Rhodobacteraceae	ASV36013	0	0	0	0	0	0	0	0	0	0	0	0	0	0	0	0	0	0	0	0	0	0	0	0	0	0	0	7	0	0	0	0	0	0	0	0	0	0	0	0	0
d__Bacteria	k__norank_d__Bacteria	p__Chloroflexi	c__Anaerolineae	o__Caldilineales	f__Caldilineaceae	g__norank_f__Caldilineaceae	s__unclassified_g__norank_f__Caldilineaceae	ASV55610	0	0	0	0	0	0	0	0	0	0	0	0	0	0	0	0	0	0	0	0	0	0	0	0	0	0	0	0	0	0	0	0	0	0	0	0	0	0	0	0	0
d__Bacteria	k__norank_d__Bacteria	p__Proteobacteria	c__Gammaproteobacteria	o__Cellvibrionales	f__Halieaceae	g__unclassified_f__Halieaceae	s__unclassified_f__Halieaceae	ASV7876	0	0	0	0	0	0	0	0	0	0	0	0	0	0	0	0	0	0	0	0	0	42	59	24	36	42	35	8	12	14	34	35	38	37	48	29	25	41	39	0	0
d__Bacteria	k__norank_d__Bacteria	p__Firmicutes	c__Bacilli	o__Paenibacillales	f__Paenibacillaceae	g__Paenibacillus	s__unclassified_g__Paenibacillus	ASV91310	0	0	0	0	0	0	0	0	0	0	0	0	0	0	0	0	0	0	0	0	2	0	0	0	0	0	0	0	0	0	0	0	0	0	0	0	0	0	0	0	0
d__Bacteria	k__norank_d__Bacteria	p__Spirochaetota	c__Spirochaetia	o__Spirochaetales	f__Spirochaetaceae	g__Spirochaeta	s__uncultured_soil_bacterium_g__Spirochaeta	ASV61582	0	0	0	0	0	0	0	0	0	0	0	0	0	2	0	0	0	0	0	0	0	0	0	0	0	0	0	0	0	0	0	0	0	0	0	0	0	0	0	0	0
d__Bacteria	k__norank_d__Bacteria	p__Verrucomicrobiota	c__Chlamydiae	o__Chlamydiales	f__unclassified_o__Chlamydiales	g__unclassified_o__Chlamydiales	s__unclassified_o__Chlamydiales	ASV9497	0	0	0	0	0	0	0	0	0	0	0	0	0	0	0	0	0	0	0	0	0	0	0	0	0	0	0	0	3	0	0	0	0	0	0	0	0	0	0	0	0
d__Bacteria	k__norank_d__Bacteria	p__Firmicutes	c__Clostridia	o__Peptostreptococcales-Tissierellales	f__Peptostreptococcaceae	g__unclassified_f__Peptostreptococcaceae	s__unclassified_f__Peptostreptococcaceae	ASV63966	0	0	0	0	0	0	0	0	0	0	0	0	0	0	0	0	0	0	0	0	0	0	0	0	0	0	0	0	0	0	0	0	0	0	0	0	0	0	0	0	0
d__Bacteria	k__norank_d__Bacteria	p__NB1-j	c__norank_p__NB1-j	o__norank_p__NB1-j	f__norank_p__NB1-j	g__norank_p__NB1-j	s__uncultured_organism_p__NB1-j	ASV15397	0	0	0	0	0	4	0	4	0	0	0	0	0	0	0	6	0	0	0	0	0	0	0	0	0	0	0	0	0	0	0	0	0	0	0	0	0	0	0	0	0
d__Bacteria	k__norank_d__Bacteria	p__Desulfobacterota	c__Desulfuromonadia	o__Sva1033	f__norank_o__Sva1033	g__norank_o__Sva1033	s__unclassified_g__norank_o__Sva1033	ASV49635	0	0	0	0	0	0	0	0	0	4	0	0	0	0	0	0	0	0	0	0	0	0	0	0	0	0	0	0	0	0	0	0	0	0	0	0	0	0	0	0	0
d__Bacteria	k__norank_d__Bacteria	p__Bacteroidota	c__Bacteroidia	o__Flavobacteriales	f__Flavobacteriaceae	g__Winogradskyella	s__Winogradskyella_aquimaris	ASV31234	0	0	0	0	0	0	0	0	0	0	0	0	0	0	0	0	0	0	0	0	0	0	0	0	0	0	0	0	0	0	0	0	0	0	0	0	8	0	0	0	0
d__Bacteria	k__norank_d__Bacteria	p__Verrucomicrobiota	c__Verrucomicrobiae	o__Pedosphaerales	f__Pedosphaeraceae	g__DEV008	s__uncultured_bacterium_g__DEV008	ASV47804	0	0	0	0	0	0	0	0	4	0	0	0	0	0	0	0	0	0	0	0	0	0	0	0	0	0	0	0	0	0	0	0	0	0	0	0	0	0	0	0	0
d__Bacteria	k__norank_d__Bacteria	p__Acidobacteriota	c__Thermoanaerobaculia	o__Thermoanaerobaculales	f__Thermoanaerobaculaceae	g__Subgroup_23	s__unclassified_g__Subgroup_23	ASV49657	0	0	0	0	0	0	0	0	0	3	0	0	0	0	0	0	0	0	0	0	0	0	0	0	0	0	0	0	0	0	0	0	0	0	0	0	0	0	0	0	0
d__Bacteria	k__norank_d__Bacteria	p__Planctomycetota	c__OM190	o__norank_c__OM190	f__norank_c__OM190	g__norank_c__OM190	s__unclassified_g__norank_c__OM190	ASV17241	0	0	0	0	0	0	0	0	0	0	0	0	0	0	0	0	0	0	0	0	0	0	0	0	0	0	6	0	0	0	0	0	0	0	0	0	0	0	0	0	0
d__Bacteria	k__norank_d__Bacteria	p__Desulfobacterota	c__Desulfobacteria	o__Desulfatiglandales	f__Desulfatiglandaceae	g__Desulfatiglans	s__marine_metagenome_g__Desulfatiglans	ASV1843	0	0	0	0	0	0	0	0	0	0	0	0	0	0	0	0	0	0	0	0	0	0	0	0	0	0	0	0	0	0	0	0	0	0	0	0	0	0	0	0	0
d__Bacteria	k__norank_d__Bacteria	p__Firmicutes	c__Clostridia	o__Peptostreptococcales-Tissierellales	f__Anaerovoracaceae	g__Anaerovorax	s__Firmicutes_bacterium_LC_13R	ASV42657	0	0	0	0	0	0	0	0	0	0	0	0	0	0	0	0	0	0	0	1	0	0	0	0	0	0	0	0	0	0	0	0	0	0	0	0	0	0	0	0	0
d__Bacteria	k__norank_d__Bacteria	p__Chloroflexi	c__Anaerolineae	o__norank_c__Anaerolineae	f__norank_c__Anaerolineae	g__norank_c__Anaerolineae	s__uncultured_bacterium_c__Anaerolineae	ASV83068	0	0	0	0	0	0	0	0	0	0	0	0	0	0	0	0	0	0	0	0	0	0	0	0	0	0	0	0	0	0	4	0	0	0	0	0	0	0	0	0	0
d__Bacteria	k__norank_d__Bacteria	p__Gemmatimonadota	c__BD2-11_terrestrial_group	o__norank_c__BD2-11_terrestrial_group	f__norank_c__BD2-11_terrestrial_group	g__norank_c__BD2-11_terrestrial_group	s__uncultured_bacterium_c__BD2-11_terrestrial_group	ASV88431	0	0	0	0	0	0	0	0	0	0	0	0	0	0	0	0	0	0	0	0	0	0	0	2	0	0	0	0	0	0	0	0	0	0	0	0	0	0	0	0	0
d__Bacteria	k__norank_d__Bacteria	p__unclassified_k__norank_d__Bacteria	c__unclassified_k__norank_d__Bacteria	o__unclassified_k__norank_d__Bacteria	f__unclassified_k__norank_d__Bacteria	g__unclassified_k__norank_d__Bacteria	s__unclassified_k__norank_d__Bacteria	ASV78389	0	0	0	0	0	0	0	0	0	0	0	0	0	0	0	0	0	0	0	0	0	0	0	0	0	0	0	0	0	0	0	2	0	0	0	0	0	0	0	0	0
d__Bacteria	k__norank_d__Bacteria	p__Proteobacteria	c__Alphaproteobacteria	o__Thalassobaculales	f__Thalassobaculaceae	g__Thalassobaculum	s__uncultured_bacterium_g__Thalassobaculum	ASV40754	0	0	0	0	0	0	0	0	0	0	0	0	0	0	0	0	0	0	0	0	0	0	0	0	0	0	0	0	0	0	0	0	0	0	0	0	0	1	0	0	0
d__Bacteria	k__norank_d__Bacteria	p__Chloroflexi	c__Anaerolineae	o__Ardenticatenales	f__norank_o__Ardenticatenales	g__norank_o__Ardenticatenales	s__uncultured_bacterium_o__Ardenticatenales	ASV67439	0	0	0	0	0	0	0	0	0	0	0	0	0	0	0	8	0	0	0	0	0	0	0	0	0	0	0	0	0	0	0	0	0	0	0	0	0	0	0	0	0
d__Bacteria	k__norank_d__Bacteria	p__unclassified_k__norank_d__Bacteria	c__unclassified_k__norank_d__Bacteria	o__unclassified_k__norank_d__Bacteria	f__unclassified_k__norank_d__Bacteria	g__unclassified_k__norank_d__Bacteria	s__unclassified_k__norank_d__Bacteria	ASV46415	0	0	0	2	0	0	0	0	0	0	0	0	0	0	0	0	0	0	0	0	0	0	0	0	0	0	0	0	0	0	0	0	0	0	0	0	0	0	0	0	0
d__Bacteria	k__norank_d__Bacteria	p__Acidobacteriota	c__Thermoanaerobaculia	o__Thermoanaerobaculales	f__Thermoanaerobaculaceae	g__Subgroup_10	s__unclassified_g__Subgroup_10	ASV8796	0	0	0	0	0	0	0	0	0	0	0	0	0	0	0	0	0	0	0	0	0	0	0	0	0	0	0	0	3	0	0	0	0	0	0	0	0	0	0	0	0
d__Bacteria	k__norank_d__Bacteria	p__Firmicutes	c__Clostridia	o__Clostridiales	f__Clostridiaceae	g__unclassified_f__Clostridiaceae	s__unclassified_f__Clostridiaceae	ASV59339	0	0	0	0	0	0	0	0	0	0	0	0	0	0	0	0	0	0	0	0	0	0	0	0	0	0	0	0	0	0	0	0	0	0	0	0	0	0	0	0	0
d__Bacteria	k__norank_d__Bacteria	p__Planctomycetota	c__OM190	o__norank_c__OM190	f__norank_c__OM190	g__norank_c__OM190	s__uncultured_bacterium_c__OM190	ASV80848	0	0	0	0	0	0	0	0	0	0	0	0	0	0	0	0	0	0	0	0	0	0	0	0	0	0	0	0	0	2	0	0	0	0	0	0	0	0	0	0	0
d__Bacteria	k__norank_d__Bacteria	p__Actinobacteriota	c__Thermoleophilia	o__Solirubrobacterales	f__67-14	g__norank_f__67-14	s__uncultured_actinobacterium_f__67-14	ASV55182	0	0	0	0	0	0	0	0	0	0	0	0	0	0	0	0	0	0	0	0	0	0	0	0	0	0	0	0	0	0	0	0	0	0	0	0	0	0	0	0	0
d__Bacteria	k__norank_d__Bacteria	p__Proteobacteria	c__Alphaproteobacteria	o__Rhizobiales	f__Beijerinckiaceae	g__unclassified_f__Beijerinckiaceae	s__unclassified_f__Beijerinckiaceae	ASV2718	0	0	0	0	0	0	0	0	0	0	0	0	0	0	0	0	0	0	0	0	0	0	0	0	0	0	0	0	0	0	0	0	0	0	0	0	0	0	0	0	0
d__Bacteria	k__norank_d__Bacteria	p__Acidobacteriota	c__Vicinamibacteria	o__Vicinamibacterales	f__norank_o__Vicinamibacterales	g__norank_o__Vicinamibacterales	s__unclassified_g__norank_o__Vicinamibacterales	ASV55948	0	5	0	0	0	0	0	0	0	0	0	0	0	0	0	0	0	0	0	0	0	0	0	0	0	0	0	0	0	0	0	0	0	0	0	0	0	0	0	0	0
d__Bacteria	k__norank_d__Bacteria	p__Proteobacteria	c__Gammaproteobacteria	o__Coxiellales	f__Coxiellaceae	g__Coxiella	s__unclassified_g__Coxiella	ASV66820	0	0	1	0	0	0	0	0	0	0	0	0	0	0	0	0	0	0	0	0	0	0	0	0	0	0	0	0	0	0	0	0	0	0	0	0	0	0	0	0	0
d__Bacteria	k__norank_d__Bacteria	p__Chloroflexi	c__Anaerolineae	o__unclassified_c__Anaerolineae	f__unclassified_c__Anaerolineae	g__unclassified_c__Anaerolineae	s__unclassified_c__Anaerolineae	ASV58912	0	0	0	0	0	0	0	0	0	0	0	0	0	0	0	0	0	0	0	0	0	0	0	0	0	0	0	0	0	0	0	0	1	0	0	0	0	0	0	0	0
d__Bacteria	k__norank_d__Bacteria	p__Gemmatimonadota	c__BD2-11_terrestrial_group	o__norank_c__BD2-11_terrestrial_group	f__norank_c__BD2-11_terrestrial_group	g__norank_c__BD2-11_terrestrial_group	s__uncultured_bacterium_c__BD2-11_terrestrial_group	ASV89395	0	0	0	0	0	0	0	0	0	0	0	0	0	0	0	0	0	0	0	0	0	0	0	0	0	0	0	0	0	0	0	0	0	0	0	0	0	0	0	0	0
d__Bacteria	k__norank_d__Bacteria	p__Acidobacteriota	c__AT-s3-28	o__norank_c__AT-s3-28	f__norank_c__AT-s3-28	g__norank_c__AT-s3-28	s__unclassified_g__norank_c__AT-s3-28	ASV80510	0	0	0	0	0	0	0	0	0	0	0	0	0	0	0	0	0	0	0	0	0	0	0	0	0	0	0	0	0	3	0	0	0	0	0	0	0	0	0	0	0
d__Bacteria	k__norank_d__Bacteria	p__Proteobacteria	c__Gammaproteobacteria	o__Cellvibrionales	f__Halieaceae	g__unclassified_f__Halieaceae	s__unclassified_f__Halieaceae	ASV8864	0	0	0	0	0	0	0	0	0	0	0	0	0	0	0	0	0	0	0	0	0	0	0	0	0	0	0	13	2	0	0	0	0	0	0	0	4	7	2	0	0
d__Bacteria	k__norank_d__Bacteria	p__Proteobacteria	c__Gammaproteobacteria	o__Burkholderiales	f__Rhodocyclaceae	g__unclassified_f__Rhodocyclaceae	s__unclassified_f__Rhodocyclaceae	ASV70126	0	0	0	0	0	0	0	0	0	0	6	0	0	0	0	0	0	0	0	0	0	0	0	0	0	0	0	0	0	0	0	0	0	0	0	0	0	0	0	0	0
d__Bacteria	k__norank_d__Bacteria	p__Bacteroidota	c__Bacteroidia	o__Bacteroidetes_VC2.1_Bac22	f__norank_o__Bacteroidetes_VC2.1_Bac22	g__norank_o__Bacteroidetes_VC2.1_Bac22	s__uncultured_Bacteroidetes_bacterium_o__Bacteroidetes_VC2.1_Bac22	ASV26003	0	0	0	0	0	0	0	0	0	0	0	0	0	0	0	0	0	0	0	0	0	4	0	0	4	0	0	0	0	0	0	0	0	0	0	0	0	0	0	0	0
d__Bacteria	k__norank_d__Bacteria	p__Actinobacteriota	c__Acidimicrobiia	o__Microtrichales	f__Ilumatobacteraceae	g__norank_f__Ilumatobacteraceae	s__unclassified_g__norank_f__Ilumatobacteraceae	ASV49995	0	0	0	0	0	0	0	0	0	3	0	0	0	0	0	0	0	0	0	0	0	0	0	0	0	0	0	0	0	0	0	0	0	0	0	0	0	0	0	0	0
d__Bacteria	k__norank_d__Bacteria	p__Firmicutes	c__Bacilli	o__Erysipelotrichales	f__Erysipelotrichaceae	g__Turicibacter	s__unclassified_g__Turicibacter	ASV33875	0	0	0	0	0	0	0	0	0	0	0	0	0	0	0	0	0	0	0	0	0	0	0	0	0	0	0	0	0	0	0	0	0	0	0	0	0	0	0	0	0
d__Bacteria	k__norank_d__Bacteria	p__Proteobacteria	c__Alphaproteobacteria	o__unclassified_c__Alphaproteobacteria	f__unclassified_c__Alphaproteobacteria	g__unclassified_c__Alphaproteobacteria	s__unclassified_c__Alphaproteobacteria	ASV22723	0	0	0	0	0	0	0	0	0	0	0	0	0	0	0	0	0	4	0	0	0	0	0	0	0	0	0	0	0	0	0	0	0	0	0	0	0	0	0	0	0
d__Bacteria	k__norank_d__Bacteria	p__Proteobacteria	c__Gammaproteobacteria	o__Chromatiales	f__Chromatiaceae	g__unclassified_f__Chromatiaceae	s__unclassified_f__Chromatiaceae	ASV76121	0	0	0	0	0	0	0	0	0	0	0	0	0	0	0	0	0	0	0	0	0	0	0	0	0	0	0	0	0	0	0	0	0	0	0	0	0	0	0	2	0
d__Bacteria	k__norank_d__Bacteria	p__Latescibacterota	c__norank_p__Latescibacterota	o__norank_p__Latescibacterota	f__norank_p__Latescibacterota	g__norank_p__Latescibacterota	s__uncultured_Gemmatimonadetes_bacterium_p__Latescibacterota	ASV22836	0	0	0	0	0	0	0	0	0	0	0	0	0	0	0	0	0	3	0	0	0	0	0	0	0	0	0	0	0	0	0	0	0	0	0	0	0	0	0	0	0
d__Bacteria	k__norank_d__Bacteria	p__Myxococcota	c__Polyangia	o__Haliangiales	f__Haliangiaceae	g__Haliangium	s__uncultured_bacterium_g__Haliangium	ASV43349	0	0	0	0	0	0	15	0	0	0	0	0	0	0	0	0	0	0	0	0	0	0	0	0	0	0	0	0	0	0	0	0	0	0	0	0	0	0	0	0	0
d__Bacteria	k__norank_d__Bacteria	p__unclassified_k__norank_d__Bacteria	c__unclassified_k__norank_d__Bacteria	o__unclassified_k__norank_d__Bacteria	f__unclassified_k__norank_d__Bacteria	g__unclassified_k__norank_d__Bacteria	s__unclassified_k__norank_d__Bacteria	ASV23006	0	0	0	0	0	0	0	0	0	0	0	0	0	0	0	0	0	3	0	0	0	0	0	0	0	0	0	0	0	0	0	0	0	0	0	0	0	0	0	0	0
d__Bacteria	k__norank_d__Bacteria	p__unclassified_k__norank_d__Bacteria	c__unclassified_k__norank_d__Bacteria	o__unclassified_k__norank_d__Bacteria	f__unclassified_k__norank_d__Bacteria	g__unclassified_k__norank_d__Bacteria	s__unclassified_k__norank_d__Bacteria	ASV83218	0	0	0	0	0	0	0	0	0	0	0	0	0	0	0	0	0	0	0	0	0	0	0	0	0	0	0	0	0	0	5	0	0	0	0	0	0	0	0	0	0
d__Bacteria	k__norank_d__Bacteria	p__Proteobacteria	c__Gammaproteobacteria	o__Steroidobacterales	f__Woeseiaceae	g__Woeseia	s__unclassified_g__Woeseia	ASV31297	0	0	0	0	0	0	0	0	0	0	0	0	0	0	0	0	0	0	0	0	0	0	0	0	0	0	0	0	0	0	16	0	10	0	0	0	6	7	0	0	0
d__Bacteria	k__norank_d__Bacteria	p__Proteobacteria	c__Alphaproteobacteria	o__unclassified_c__Alphaproteobacteria	f__unclassified_c__Alphaproteobacteria	g__unclassified_c__Alphaproteobacteria	s__unclassified_c__Alphaproteobacteria	ASV84471	0	0	0	0	0	0	0	0	0	0	0	0	0	0	0	0	0	0	0	0	0	0	0	0	0	0	0	0	0	0	1	0	0	0	0	0	0	0	0	0	0
d__Bacteria	k__norank_d__Bacteria	p__Proteobacteria	c__Alphaproteobacteria	o__Rhodobacterales	f__Rhodobacteraceae	g__unclassified_f__Rhodobacteraceae	s__unclassified_f__Rhodobacteraceae	ASV52567	3	0	0	0	0	0	0	0	0	0	0	0	0	0	0	0	0	0	0	0	0	0	0	0	0	0	0	0	0	0	0	0	0	0	0	0	0	0	0	0	0
d__Bacteria	k__norank_d__Bacteria	p__Proteobacteria	c__Alphaproteobacteria	o__Caulobacterales	f__Parvularculaceae	g__Marinicaulis	s__uncultured_bacterium_g__Marinicaulis	ASV8251	0	0	0	0	0	0	0	0	0	0	0	0	0	0	0	0	0	0	0	0	0	0	0	0	0	0	0	0	8	0	0	0	0	0	0	0	0	0	0	0	0
d__Bacteria	k__norank_d__Bacteria	p__Proteobacteria	c__Gammaproteobacteria	o__Pseudomonadales	f__Moraxellaceae	g__Acinetobacter	s__unclassified_g__Acinetobacter	ASV89313	0	0	0	0	0	0	0	0	0	0	0	0	0	0	0	0	0	0	0	0	0	0	0	0	0	0	0	0	0	0	0	0	0	0	0	0	0	0	0	0	0
d__Bacteria	k__norank_d__Bacteria	p__unclassified_k__norank_d__Bacteria	c__unclassified_k__norank_d__Bacteria	o__unclassified_k__norank_d__Bacteria	f__unclassified_k__norank_d__Bacteria	g__unclassified_k__norank_d__Bacteria	s__unclassified_k__norank_d__Bacteria	ASV68478	0	0	0	0	0	0	0	0	0	0	0	0	0	0	0	1	0	0	0	0	0	0	0	0	0	0	0	0	0	0	0	0	0	0	0	0	0	0	0	0	0
d__Bacteria	k__norank_d__Bacteria	p__Proteobacteria	c__Alphaproteobacteria	o__Rhizobiales	f__Methyloligellaceae	g__Methyloceanibacter	s__unclassified_g__Methyloceanibacter	ASV63689	0	0	0	0	0	0	0	0	0	0	0	0	0	0	0	0	0	0	0	0	0	0	0	0	0	0	0	0	0	0	0	0	0	0	0	0	0	0	0	0	0
d__Bacteria	k__norank_d__Bacteria	p__Chloroflexi	c__Dehalococcoidia	o__MSBL5	f__norank_o__MSBL5	g__norank_o__MSBL5	s__uncultured_bacterium_o__MSBL5	ASV45030	0	0	0	7	0	0	0	0	0	0	0	0	0	0	0	0	0	0	0	0	0	0	0	0	0	0	0	0	0	0	0	0	0	0	0	0	0	0	0	0	0
d__Bacteria	k__norank_d__Bacteria	p__Patescibacteria	c__ABY1	o__Candidatus_Kerfeldbacteria	f__norank_o__Candidatus_Kerfeldbacteria	g__norank_o__Candidatus_Kerfeldbacteria	s__uncultured_bacterium_o__Candidatus_Kerfeldbacteria	ASV32109	0	0	0	0	0	0	0	0	0	0	0	0	0	0	0	0	0	0	0	0	0	0	0	0	0	0	0	0	0	0	0	0	0	0	0	0	2	0	0	0	0
d__Bacteria	k__norank_d__Bacteria	p__Bacteroidota	c__Bacteroidia	o__Chitinophagales	f__Saprospiraceae	g__norank_f__Saprospiraceae	s__unclassified_g__norank_f__Saprospiraceae	ASV98948	0	0	0	0	0	0	0	0	0	0	0	0	0	0	0	0	5	0	0	0	0	0	0	0	0	0	0	0	0	0	0	0	0	0	0	0	0	0	0	0	0
d__Bacteria	k__norank_d__Bacteria	p__Patescibacteria	c__Dojkabacteria	o__norank_c__Dojkabacteria	f__norank_c__Dojkabacteria	g__norank_c__Dojkabacteria	s__uncultured_anaerobic_bacterium_c__Dojkabacteria	ASV37382	0	0	0	0	0	0	0	0	0	0	0	0	0	0	0	0	0	0	10	17	2	0	0	0	0	0	0	0	0	0	0	0	0	0	0	0	0	0	0	0	0
d__Bacteria	k__norank_d__Bacteria	p__Latescibacterota	c__norank_p__Latescibacterota	o__norank_p__Latescibacterota	f__norank_p__Latescibacterota	g__norank_p__Latescibacterota	s__saltmarsh_clone_LCP-67	ASV97807	0	0	0	0	0	0	0	0	0	0	0	0	0	0	0	0	0	0	0	0	0	0	0	0	4	0	0	0	0	0	0	0	0	0	0	0	0	0	0	0	0
d__Bacteria	k__norank_d__Bacteria	p__Acidobacteriota	c__AT-s3-28	o__norank_c__AT-s3-28	f__norank_c__AT-s3-28	g__norank_c__AT-s3-28	s__uncultured_bacterium_c__AT-s3-28	ASV8736	0	0	0	0	0	0	0	0	0	0	0	0	0	0	0	0	0	0	0	0	0	0	0	0	0	0	0	0	4	0	0	0	0	0	0	0	0	0	0	0	0
d__Bacteria	k__norank_d__Bacteria	p__Verrucomicrobiota	c__Chlamydiae	o__Chlamydiales	f__unclassified_o__Chlamydiales	g__unclassified_o__Chlamydiales	s__unclassified_o__Chlamydiales	ASV92612	0	0	0	0	0	0	0	0	0	0	0	5	0	0	0	0	0	0	0	0	0	0	0	0	0	0	0	0	0	0	0	0	0	0	0	0	0	0	0	0	0
d__Bacteria	k__norank_d__Bacteria	p__unclassified_k__norank_d__Bacteria	c__unclassified_k__norank_d__Bacteria	o__unclassified_k__norank_d__Bacteria	f__unclassified_k__norank_d__Bacteria	g__unclassified_k__norank_d__Bacteria	s__unclassified_k__norank_d__Bacteria	ASV35446	0	0	0	0	0	0	0	0	0	0	0	0	0	0	0	0	0	0	0	0	0	0	0	0	0	0	0	0	0	0	0	0	0	0	0	0	0	0	0	0	0
d__Bacteria	k__norank_d__Bacteria	p__NB1-j	c__norank_p__NB1-j	o__norank_p__NB1-j	f__norank_p__NB1-j	g__norank_p__NB1-j	s__unclassified_g__norank_p__NB1-j	ASV21808	0	0	0	0	0	0	0	0	0	0	0	0	0	0	0	0	0	9	0	0	0	0	0	0	0	0	0	0	0	0	0	0	0	0	0	0	0	0	0	0	0
d__Bacteria	k__norank_d__Bacteria	p__unclassified_k__norank_d__Bacteria	c__unclassified_k__norank_d__Bacteria	o__unclassified_k__norank_d__Bacteria	f__unclassified_k__norank_d__Bacteria	g__unclassified_k__norank_d__Bacteria	s__unclassified_k__norank_d__Bacteria	ASV65418	0	0	4	0	0	0	0	0	0	0	0	0	0	0	0	0	0	0	0	0	0	0	0	0	0	0	0	0	0	0	0	0	0	0	0	0	0	0	0	0	0
d__Bacteria	k__norank_d__Bacteria	p__Synergistota	c__Synergistia	o__Synergistales	f__Synergistaceae	g__norank_f__Synergistaceae	s__unclassified_g__norank_f__Synergistaceae	ASV41209	0	0	0	0	0	0	0	0	0	0	0	0	0	0	0	0	0	0	0	9	0	0	0	0	0	0	0	0	0	0	0	0	0	0	0	0	0	0	0	0	0
d__Bacteria	k__norank_d__Bacteria	p__Chloroflexi	c__Anaerolineae	o__Anaerolineales	f__Anaerolineaceae	g__unclassified_f__Anaerolineaceae	s__unclassified_f__Anaerolineaceae	ASV77612	0	0	0	0	0	0	0	0	0	0	0	0	0	0	0	0	0	0	0	0	0	0	0	0	0	0	0	0	0	0	0	0	0	0	0	0	0	0	0	0	0
d__Bacteria	k__norank_d__Bacteria	p__Actinobacteriota	c__Acidimicrobiia	o__Actinomarinales	f__norank_o__Actinomarinales	g__norank_o__Actinomarinales	s__unclassified_g__norank_o__Actinomarinales	ASV775	0	0	0	11	0	16	0	0	0	0	0	0	0	0	0	0	0	0	0	0	0	0	0	0	0	0	0	0	0	0	0	0	0	0	0	0	0	0	0	0	4
d__Bacteria	k__norank_d__Bacteria	p__Acidobacteriota	c__Thermoanaerobaculia	o__Thermoanaerobaculales	f__Thermoanaerobaculaceae	g__Subgroup_23	s__unclassified_g__Subgroup_23	ASV19472	0	0	0	0	0	0	0	0	0	0	0	0	0	0	0	0	0	0	0	0	0	0	0	0	0	6	0	0	0	0	8	6	6	84	30	60	89	0	0	0	0
d__Bacteria	k__norank_d__Bacteria	p__Latescibacterota	c__norank_p__Latescibacterota	o__norank_p__Latescibacterota	f__norank_p__Latescibacterota	g__norank_p__Latescibacterota	s__unclassified_g__norank_p__Latescibacterota	ASV7014	0	0	0	0	0	0	0	0	0	0	0	0	0	0	2	0	0	0	0	0	0	0	0	0	0	0	0	0	0	0	0	0	0	0	0	0	0	0	0	0	0
d__Bacteria	k__norank_d__Bacteria	p__Bacteroidota	c__Ignavibacteria	o__Ignavibacteriales	f__Melioribacteraceae	g__IheB3-7	s__uncultured_bacterium_g__IheB3-7	ASV40191	0	0	0	0	0	0	0	0	0	0	0	0	0	0	0	0	0	0	0	0	0	0	0	0	0	3	0	0	0	0	0	0	0	0	0	0	0	3	0	0	0
d__Bacteria	k__norank_d__Bacteria	p__Latescibacterota	c__norank_p__Latescibacterota	o__norank_p__Latescibacterota	f__norank_p__Latescibacterota	g__norank_p__Latescibacterota	s__uncultured_organism_p__Latescibacterota	ASV39477	0	0	0	0	0	0	0	0	0	0	0	0	0	0	0	0	0	0	2	0	0	0	0	0	0	0	0	0	0	0	0	0	0	0	0	0	0	0	0	0	0
d__Bacteria	k__norank_d__Bacteria	p__Proteobacteria	c__Gammaproteobacteria	o__unclassified_c__Gammaproteobacteria	f__unclassified_c__Gammaproteobacteria	g__unclassified_c__Gammaproteobacteria	s__unclassified_c__Gammaproteobacteria	ASV59369	0	0	0	0	0	0	0	0	0	0	0	0	0	0	0	0	0	0	0	0	0	0	0	0	0	0	0	0	0	0	0	0	0	0	0	0	0	0	0	0	0
d__Bacteria	k__norank_d__Bacteria	p__Proteobacteria	c__Gammaproteobacteria	o__unclassified_c__Gammaproteobacteria	f__unclassified_c__Gammaproteobacteria	g__unclassified_c__Gammaproteobacteria	s__unclassified_c__Gammaproteobacteria	ASV66688	0	0	1	0	0	0	0	0	0	0	0	0	0	0	0	0	0	0	0	0	0	0	0	0	0	0	0	0	0	0	0	0	0	0	0	0	0	0	0	0	0
d__Bacteria	k__norank_d__Bacteria	p__Chloroflexi	c__Anaerolineae	o__unclassified_c__Anaerolineae	f__unclassified_c__Anaerolineae	g__unclassified_c__Anaerolineae	s__unclassified_c__Anaerolineae	ASV27961	0	0	0	0	0	0	0	0	0	0	0	0	0	0	0	0	0	0	0	0	0	0	0	0	0	0	0	0	0	0	0	0	0	3	0	0	0	0	0	0	0
d__Bacteria	k__norank_d__Bacteria	p__Acidobacteriota	c__AT-s3-28	o__norank_c__AT-s3-28	f__norank_c__AT-s3-28	g__norank_c__AT-s3-28	s__uncultured_bacterium_c__AT-s3-28	ASV16761	0	0	0	0	0	0	0	0	0	0	0	0	0	0	0	0	0	0	0	0	0	0	0	0	0	0	7	0	0	0	0	0	0	0	0	0	0	0	0	0	0
d__Bacteria	k__norank_d__Bacteria	p__Firmicutes	c__Bacilli	o__unclassified_c__Bacilli	f__unclassified_c__Bacilli	g__unclassified_c__Bacilli	s__unclassified_c__Bacilli	ASV83888	0	0	0	0	0	0	0	0	0	0	0	0	0	0	0	0	0	0	0	0	0	0	0	0	0	0	0	0	0	0	2	0	0	0	0	0	0	0	0	0	0
d__Bacteria	k__norank_d__Bacteria	p__Nitrospirota	c__Nitrospiria	o__Nitrospirales	f__Nitrospiraceae	g__Nitrospira	s__Nitrospira_sp._enrichment_culture_clone_Aa01	ASV73305	0	0	0	0	0	0	0	0	0	0	0	0	0	0	0	0	0	0	0	0	0	0	0	0	0	1	0	0	0	0	0	0	0	0	0	0	0	0	0	0	0
d__Bacteria	k__norank_d__Bacteria	p__Bacteroidota	c__Bacteroidia	o__Cytophagales	f__Microscillaceae	g__norank_f__Microscillaceae	s__uncultured_bacterium_f__Microscillaceae	ASV91040	0	0	0	0	0	0	0	0	0	0	0	0	0	0	0	0	0	0	0	0	3	0	0	0	0	0	0	0	0	0	0	0	0	0	0	0	0	0	0	0	0
d__Bacteria	k__norank_d__Bacteria	p__Acidobacteriota	c__Subgroup_21	o__norank_c__Subgroup_21	f__norank_c__Subgroup_21	g__norank_c__Subgroup_21	s__unclassified_g__norank_c__Subgroup_21	ASV40774	0	0	0	0	0	0	0	0	0	0	0	0	0	0	0	0	0	0	0	0	0	0	0	0	0	0	0	0	0	0	0	0	0	0	0	0	0	1	0	0	0
d__Bacteria	k__norank_d__Bacteria	p__Desulfobacterota	c__Desulfobulbia	o__Desulfobulbales	f__Desulfocapsaceae	g__norank_f__Desulfocapsaceae	s__unclassified_g__norank_f__Desulfocapsaceae	ASV82707	0	0	0	0	0	0	0	0	0	0	0	0	0	0	0	0	0	0	0	0	0	0	0	0	0	0	0	0	0	0	0	0	0	0	0	0	0	0	2	0	0
d__Bacteria	k__norank_d__Bacteria	p__SAR324_cladeMarine_group_B	c__norank_p__SAR324_cladeMarine_group_B	o__norank_p__SAR324_cladeMarine_group_B	f__norank_p__SAR324_cladeMarine_group_B	g__norank_p__SAR324_cladeMarine_group_B	s__Candidatus_Nitrosoarchaeum_limnia_SFB1_p__SAR324_cladeMarine_group_B	ASV6723	0	0	0	0	0	0	0	0	0	0	3	0	0	0	2	0	0	0	0	0	0	0	0	0	0	0	0	0	0	0	0	0	0	0	0	0	0	0	0	0	0
d__Bacteria	k__norank_d__Bacteria	p__Proteobacteria	c__Gammaproteobacteria	o__norank_c__Gammaproteobacteria	f__norank_c__Gammaproteobacteria	g__norank_c__Gammaproteobacteria	s__unclassified_g__norank_c__Gammaproteobacteria	ASV1611	0	0	0	0	0	0	0	0	0	0	0	0	0	0	0	0	0	0	0	0	0	0	0	0	0	0	0	0	0	0	0	0	0	0	0	0	0	0	0	0	0
d__Bacteria	k__norank_d__Bacteria	p__Proteobacteria	c__Gammaproteobacteria	o__Cellvibrionales	f__Halieaceae	g__Parahaliea	s__uncultured_gamma_proteobacterium_g__Parahaliea	ASV86453	0	0	0	0	0	0	0	0	0	0	0	0	0	0	0	0	0	0	0	0	0	0	0	18	0	0	0	0	0	0	0	0	0	0	0	0	0	0	0	0	0
d__Bacteria	k__norank_d__Bacteria	p__Bacteroidota	c__Bacteroidia	o__Flavobacteriales	f__NS9_marine_group	g__norank_f__NS9_marine_group	s__unclassified_g__norank_f__NS9_marine_group	ASV68063	0	0	0	0	0	0	0	0	0	0	0	0	0	0	0	4	0	0	0	0	0	0	0	0	0	0	0	0	0	0	0	0	0	0	0	0	0	0	0	0	0
d__Bacteria	k__norank_d__Bacteria	p__unclassified_k__norank_d__Bacteria	c__unclassified_k__norank_d__Bacteria	o__unclassified_k__norank_d__Bacteria	f__unclassified_k__norank_d__Bacteria	g__unclassified_k__norank_d__Bacteria	s__unclassified_k__norank_d__Bacteria	ASV63577	0	0	0	0	0	0	0	0	0	0	0	0	0	0	0	0	0	0	0	0	0	0	0	0	0	0	0	0	0	0	0	0	0	0	0	1	0	0	0	0	0
d__Bacteria	k__norank_d__Bacteria	p__Acidobacteriota	c__Subgroup_21	o__norank_c__Subgroup_21	f__norank_c__Subgroup_21	g__norank_c__Subgroup_21	s__uncultured_bacterium_c__Subgroup_21	ASV16209	0	0	0	0	0	0	0	0	0	0	0	0	0	0	0	0	0	0	0	0	0	0	0	0	0	20	16	0	0	0	0	0	0	0	0	0	0	0	0	0	0
d__Bacteria	k__norank_d__Bacteria	p__Spirochaetota	c__Spirochaetia	o__Spirochaetales	f__Spirochaetaceae	g__GWE2-31-10	s__uncultured_bacterium_g__GWE2-31-10	ASV20018	0	0	0	0	0	0	0	0	0	0	0	0	0	0	0	0	0	0	0	0	0	0	0	0	0	0	0	0	0	0	0	0	0	0	5	0	0	0	0	0	0
d__Bacteria	k__norank_d__Bacteria	p__Acidobacteriota	c__Acidobacteriae	o__unclassified_c__Acidobacteriae	f__unclassified_c__Acidobacteriae	g__unclassified_c__Acidobacteriae	s__unclassified_c__Acidobacteriae	ASV50554	0	0	0	0	20	4	0	0	0	0	0	0	0	0	0	0	0	0	0	0	0	0	0	0	0	0	0	0	0	0	0	0	0	0	0	0	0	0	0	0	0
d__Bacteria	k__norank_d__Bacteria	p__unclassified_k__norank_d__Bacteria	c__unclassified_k__norank_d__Bacteria	o__unclassified_k__norank_d__Bacteria	f__unclassified_k__norank_d__Bacteria	g__unclassified_k__norank_d__Bacteria	s__unclassified_k__norank_d__Bacteria	ASV41663	0	0	0	0	0	0	0	0	0	0	0	0	0	0	0	0	0	0	0	4	0	0	0	0	0	0	0	0	0	0	0	0	0	0	0	0	0	0	0	0	0
d__Bacteria	k__norank_d__Bacteria	p__unclassified_k__norank_d__Bacteria	c__unclassified_k__norank_d__Bacteria	o__unclassified_k__norank_d__Bacteria	f__unclassified_k__norank_d__Bacteria	g__unclassified_k__norank_d__Bacteria	s__unclassified_k__norank_d__Bacteria	ASV55297	0	0	0	0	0	0	0	0	0	0	0	0	0	0	0	0	0	0	0	0	0	0	0	0	0	0	0	0	0	0	0	0	0	0	0	0	0	0	0	0	0
d__Bacteria	k__norank_d__Bacteria	p__Proteobacteria	c__Alphaproteobacteria	o__Rhizobiales	f__Rhizobiaceae	g__Mesorhizobium	s__unclassified_g__Mesorhizobium	ASV35972	0	0	0	0	0	0	0	0	0	0	0	0	0	0	0	0	0	0	0	0	0	0	0	0	0	0	0	15	0	0	0	0	0	0	0	0	0	0	0	0	0
d__Bacteria	k__norank_d__Bacteria	p__Proteobacteria	c__Gammaproteobacteria	o__unclassified_c__Gammaproteobacteria	f__unclassified_c__Gammaproteobacteria	g__unclassified_c__Gammaproteobacteria	s__unclassified_c__Gammaproteobacteria	ASV91099	0	0	0	0	0	0	0	0	0	0	0	0	0	0	0	0	0	0	0	0	3	0	0	0	0	0	0	0	0	0	0	0	0	0	0	0	0	0	0	0	0
d__Bacteria	k__norank_d__Bacteria	p__Firmicutes	c__Bacilli	o__Haloplasmatales	f__Haloplasmataceae	g__Haloplasma	s__uncultured_low_GC_Gram-positive_bacterium_g__Haloplasma	ASV86943	0	0	0	0	0	0	0	0	0	0	0	0	0	0	0	0	0	0	0	0	0	0	0	3	0	0	0	0	0	0	0	0	0	0	0	0	0	0	0	0	0
d__Bacteria	k__norank_d__Bacteria	p__Proteobacteria	c__Gammaproteobacteria	o__unclassified_c__Gammaproteobacteria	f__unclassified_c__Gammaproteobacteria	g__unclassified_c__Gammaproteobacteria	s__unclassified_c__Gammaproteobacteria	ASV84858	0	0	0	0	0	0	0	0	0	0	0	0	0	0	0	0	0	0	0	0	0	0	0	0	0	0	0	0	0	0	0	0	0	0	0	0	0	0	0	0	0
d__Bacteria	k__norank_d__Bacteria	p__Proteobacteria	c__Gammaproteobacteria	o__Burkholderiales	f__Nitrosomonadaceae	g__IS-44	s__unclassified_g__IS-44	ASV91845	0	0	0	0	0	0	0	0	0	0	0	0	0	0	0	0	0	0	0	0	2	0	0	0	0	0	0	0	0	0	0	0	0	0	0	0	0	0	0	0	0
d__Bacteria	k__norank_d__Bacteria	p__Proteobacteria	c__Gammaproteobacteria	o__unclassified_c__Gammaproteobacteria	f__unclassified_c__Gammaproteobacteria	g__unclassified_c__Gammaproteobacteria	s__unclassified_c__Gammaproteobacteria	ASV84414	0	0	0	0	0	0	0	0	0	0	0	0	0	0	0	0	0	0	0	0	0	0	0	0	0	0	0	0	0	0	2	0	0	0	0	0	0	0	0	0	0
d__Bacteria	k__norank_d__Bacteria	p__Actinobacteriota	c__Acidimicrobiia	o__Microtrichales	f__norank_o__Microtrichales	g__norank_o__Microtrichales	s__unclassified_g__norank_o__Microtrichales	ASV17809	0	0	0	0	0	0	0	0	0	0	0	0	0	0	0	0	0	0	0	0	0	0	0	0	0	0	2	0	0	0	0	0	0	0	0	0	0	0	0	0	0
d__Bacteria	k__norank_d__Bacteria	p__Actinobacteriota	c__unclassified_p__Actinobacteriota	o__unclassified_p__Actinobacteriota	f__unclassified_p__Actinobacteriota	g__unclassified_p__Actinobacteriota	s__unclassified_p__Actinobacteriota	ASV40748	0	0	0	0	0	0	0	0	0	0	0	0	0	0	0	0	0	0	0	0	0	0	0	0	0	0	0	0	0	0	0	0	0	0	0	0	0	2	0	0	0
d__Bacteria	k__norank_d__Bacteria	p__Planctomycetota	c__OM190	o__norank_c__OM190	f__norank_c__OM190	g__norank_c__OM190	s__unclassified_g__norank_c__OM190	ASV97689	0	0	0	0	0	0	0	0	0	0	0	0	0	0	0	0	0	0	0	0	0	0	0	0	4	0	0	0	0	0	0	0	0	0	0	0	0	0	0	0	0
d__Bacteria	k__norank_d__Bacteria	p__Proteobacteria	c__Gammaproteobacteria	o__Pseudomonadales	f__Moraxellaceae	g__norank_f__Moraxellaceae	s__unclassified_g__norank_f__Moraxellaceae	ASV101060	0	0	0	0	0	0	0	0	0	0	0	0	0	0	0	0	2	0	0	0	0	0	0	0	0	0	0	0	0	0	0	0	0	0	0	0	0	0	0	0	0
d__Bacteria	k__norank_d__Bacteria	p__Firmicutes	c__Clostridia	o__Lachnospirales	f__Lachnospiraceae	g__Cellulosilyticum	s__unclassified_g__Cellulosilyticum	ASV61575	0	0	0	0	0	0	0	0	0	0	0	0	0	3	0	0	0	0	0	0	0	0	0	0	0	0	0	0	0	0	0	0	0	0	0	0	0	0	0	0	0
d__Bacteria	k__norank_d__Bacteria	p__Firmicutes	c__Clostridia	o__Eubacteriales	f__Eubacteriaceae	g__Acetobacterium	s__unclassified_g__Acetobacterium	ASV42902	0	0	0	0	0	0	0	0	0	0	0	0	0	0	0	0	0	0	0	2	0	0	0	0	0	0	0	0	0	0	0	0	0	0	0	0	0	0	0	0	0
d__Bacteria	k__norank_d__Bacteria	p__Chloroflexi	c__Anaerolineae	o__SBR1031	f__norank_o__SBR1031	g__norank_o__SBR1031	s__uncultured_bacterium_o__SBR1031	ASV61714	0	0	0	0	0	0	0	0	0	0	0	0	0	1	0	0	0	0	0	0	0	0	0	0	0	0	0	0	0	0	0	0	0	0	0	0	0	0	0	0	0
d__Bacteria	k__norank_d__Bacteria	p__Chloroflexi	c__Anaerolineae	o__SBR1031	f__norank_o__SBR1031	g__norank_o__SBR1031	s__metagenome_o__SBR1031	ASV14858	3	0	0	0	0	5	8	6	8	0	0	0	0	0	0	1	0	2	0	0	0	0	0	0	0	0	0	0	0	0	0	0	0	0	0	0	0	0	0	0	0
d__Bacteria	k__norank_d__Bacteria	p__Acidobacteriota	c__Vicinamibacteria	o__Vicinamibacterales	f__norank_o__Vicinamibacterales	g__norank_o__Vicinamibacterales	s__unclassified_g__norank_o__Vicinamibacterales	ASV5612	0	0	0	0	0	0	0	0	0	0	0	0	0	0	3	0	0	0	0	0	0	0	0	0	0	0	0	0	0	0	0	0	0	0	0	0	0	0	0	0	0
d__Bacteria	k__norank_d__Bacteria	p__Proteobacteria	c__unclassified_p__Proteobacteria	o__unclassified_p__Proteobacteria	f__unclassified_p__Proteobacteria	g__unclassified_p__Proteobacteria	s__unclassified_p__Proteobacteria	ASV99768	0	0	0	0	0	0	0	0	0	0	0	0	0	0	0	0	3	0	0	0	0	0	0	0	0	0	0	0	0	0	0	0	0	0	0	0	0	0	0	0	0
d__Bacteria	k__norank_d__Bacteria	p__Acidobacteriota	c__Holophagae	o__Subgroup_7	f__norank_o__Subgroup_7	g__norank_o__Subgroup_7	s__unclassified_g__norank_o__Subgroup_7	ASV48986	0	0	0	0	0	0	0	0	0	7	0	0	0	0	0	0	0	0	0	0	0	0	0	0	0	0	0	0	0	0	0	0	0	0	0	0	0	0	0	0	0
d__Bacteria	k__norank_d__Bacteria	p__MBNT15	c__norank_p__MBNT15	o__norank_p__MBNT15	f__norank_p__MBNT15	g__norank_p__MBNT15	s__unclassified_g__norank_p__MBNT15	ASV14177	0	0	0	0	0	3	0	19	0	0	0	0	0	0	0	0	0	3	0	0	0	0	0	0	0	0	0	0	0	0	0	0	0	0	0	0	0	0	0	0	0
d__Bacteria	k__norank_d__Bacteria	p__Gemmatimonadota	c__S0134_terrestrial_group	o__norank_c__S0134_terrestrial_group	f__norank_c__S0134_terrestrial_group	g__norank_c__S0134_terrestrial_group	s__uncultured_bacterium_c__S0134_terrestrial_group	ASV38975	0	0	0	0	0	0	0	0	0	0	0	0	0	0	0	0	0	0	1	0	0	0	0	0	0	0	0	0	0	0	0	0	0	0	0	0	0	0	0	0	0
d__Bacteria	k__norank_d__Bacteria	p__Proteobacteria	c__Gammaproteobacteria	o__unclassified_c__Gammaproteobacteria	f__unclassified_c__Gammaproteobacteria	g__unclassified_c__Gammaproteobacteria	s__unclassified_c__Gammaproteobacteria	ASV78028	0	0	0	0	0	0	0	0	0	0	0	0	0	0	0	0	0	0	0	0	0	0	0	0	0	0	0	0	0	0	0	10	0	0	0	0	0	0	0	0	0
d__Bacteria	k__norank_d__Bacteria	p__Dadabacteria	c__Dadabacteriia	o__Dadabacteriales	f__norank_o__Dadabacteriales	g__norank_o__Dadabacteriales	s__unclassified_g__norank_o__Dadabacteriales	ASV51550	10	2	0	0	0	5	0	0	0	0	0	0	0	0	0	7	6	0	0	0	0	0	0	0	0	0	0	0	0	0	0	0	0	0	0	0	0	0	0	0	0
d__Bacteria	k__norank_d__Bacteria	p__Bacteroidota	c__Bacteroidia	o__Flavobacteriales	f__Flavobacteriaceae	g__Flavobacterium	s__unclassified_g__Flavobacterium	ASV49572	0	0	0	0	0	0	0	0	0	3	7	2	0	0	0	0	0	0	0	0	0	0	0	0	0	0	0	0	0	0	0	0	0	0	0	0	0	0	0	0	0
d__Bacteria	k__norank_d__Bacteria	p__Proteobacteria	c__Gammaproteobacteria	o__unclassified_c__Gammaproteobacteria	f__unclassified_c__Gammaproteobacteria	g__unclassified_c__Gammaproteobacteria	s__unclassified_c__Gammaproteobacteria	ASV66317	0	0	2	0	0	0	0	0	0	0	0	0	0	0	0	0	0	0	0	0	0	0	0	0	0	0	0	0	0	0	0	0	0	0	0	0	0	0	0	0	0
d__Bacteria	k__norank_d__Bacteria	p__Deferrisomatota	c__Defferrisomatia	o__Defferrisomatales	f__Defferrisomataceae	g__Deferrisoma	s__uncultured_Syntrophobacterales_bacterium_g__Deferrisoma	ASV91844	0	0	0	0	0	0	0	0	0	0	0	0	0	0	0	0	0	0	0	0	2	0	0	0	0	0	0	0	0	0	0	0	0	0	0	0	0	0	0	0	0
d__Bacteria	k__norank_d__Bacteria	p__Proteobacteria	c__Alphaproteobacteria	o__unclassified_c__Alphaproteobacteria	f__unclassified_c__Alphaproteobacteria	g__unclassified_c__Alphaproteobacteria	s__unclassified_c__Alphaproteobacteria	ASV79961	0	0	0	0	0	0	0	0	0	0	0	0	0	0	0	0	0	0	0	0	0	0	0	0	0	0	0	0	0	7	0	0	0	0	0	0	0	0	0	0	0
d__Bacteria	k__norank_d__Bacteria	p__Latescibacterota	c__norank_p__Latescibacterota	o__norank_p__Latescibacterota	f__norank_p__Latescibacterota	g__norank_p__Latescibacterota	s__uncultured_Latescibacteria_bacterium_p__Latescibacterota	ASV79871	0	0	0	0	0	0	0	0	0	0	0	0	0	0	0	0	0	0	0	0	0	0	0	0	0	0	0	0	0	11	0	0	0	0	0	0	0	0	0	0	0
d__Bacteria	k__norank_d__Bacteria	p__Chloroflexi	c__Anaerolineae	o__unclassified_c__Anaerolineae	f__unclassified_c__Anaerolineae	g__unclassified_c__Anaerolineae	s__unclassified_c__Anaerolineae	ASV55286	0	0	0	0	0	0	0	0	0	0	0	0	0	0	0	0	0	0	0	0	0	0	0	0	0	0	0	0	0	0	0	0	0	0	0	0	0	0	0	0	0
d__Bacteria	k__norank_d__Bacteria	p__Campilobacterota	c__Campylobacteria	o__Campylobacterales	f__Sulfurovaceae	g__Sulfurovum	s__unclassified_g__Sulfurovum	ASV2915	0	0	0	0	0	0	0	0	0	20	23	15	24	20	29	0	0	0	0	0	0	25	25	13	0	0	0	0	0	0	0	0	0	0	0	0	0	0	0	0	0
d__Bacteria	k__norank_d__Bacteria	p__Bacteroidota	c__Bacteroidia	o__unclassified_c__Bacteroidia	f__unclassified_c__Bacteroidia	g__unclassified_c__Bacteroidia	s__unclassified_c__Bacteroidia	ASV51260	0	0	0	0	2	0	0	0	0	0	0	0	0	0	0	2	0	0	0	0	0	0	0	0	0	0	0	0	0	0	0	0	0	0	0	0	0	0	0	0	0
d__Bacteria	k__norank_d__Bacteria	p__Chloroflexi	c__Anaerolineae	o__SBR1031	f__unclassified_o__SBR1031	g__unclassified_o__SBR1031	s__unclassified_o__SBR1031	ASV44186	0	0	0	0	0	0	3	0	0	0	0	0	0	0	0	0	0	0	0	0	0	0	0	0	0	0	0	0	0	0	0	0	0	0	0	0	0	0	0	0	0
d__Bacteria	k__norank_d__Bacteria	p__Myxococcota	c__Myxococcia	o__Myxococcales	f__Myxococcaceae	g__norank_f__Myxococcaceae	s__uncultured_bacterium_f__Myxococcaceae	ASV48054	0	0	0	0	0	0	0	0	3	0	0	0	0	0	0	0	0	0	0	0	0	0	0	0	0	0	0	0	0	0	0	0	0	0	0	0	0	0	0	0	0
d__Bacteria	k__norank_d__Bacteria	p__Firmicutes	c__Clostridia	o__Clostridiales	f__Clostridiaceae	g__unclassified_f__Clostridiaceae	s__unclassified_f__Clostridiaceae	ASV97702	0	0	0	0	0	0	0	0	0	0	0	0	0	0	0	0	0	0	0	0	0	0	0	0	6	0	0	0	0	0	0	0	0	0	0	0	0	0	0	0	0
d__Bacteria	k__norank_d__Bacteria	p__Proteobacteria	c__Gammaproteobacteria	o__Cellvibrionales	f__Spongiibacteraceae	g__BD1-7_clade	s__unclassified_g__BD1-7_clade	ASV59611	0	0	0	0	0	0	0	0	0	0	0	0	0	0	0	0	0	0	0	0	0	0	0	0	0	0	0	0	0	0	0	0	0	0	0	0	0	0	0	0	0
d__Bacteria	k__norank_d__Bacteria	p__Proteobacteria	c__Gammaproteobacteria	o__unclassified_c__Gammaproteobacteria	f__unclassified_c__Gammaproteobacteria	g__unclassified_c__Gammaproteobacteria	s__unclassified_c__Gammaproteobacteria	ASV13242	0	0	0	0	0	0	0	0	0	0	0	0	2	0	0	0	0	0	0	0	0	0	0	0	0	0	0	0	0	0	0	0	0	0	0	0	0	0	0	0	0
d__Bacteria	k__norank_d__Bacteria	p__Firmicutes	c__Clostridia	o__Eubacteriales	f__Eubacteriaceae	g__Eubacterium	s__unclassified_g__Eubacterium	ASV34687	0	0	0	0	0	0	0	0	0	0	0	0	0	0	0	0	0	0	0	0	0	0	0	0	0	0	0	0	0	0	0	0	0	0	0	0	0	0	0	0	0
d__Bacteria	k__norank_d__Bacteria	p__Actinobacteriota	c__Thermoleophilia	o__Solirubrobacterales	f__Solirubrobacteraceae	g__Conexibacter	s__unclassified_g__Conexibacter	ASV157	0	0	0	0	0	0	0	0	0	0	0	0	0	0	0	0	0	0	0	0	0	0	0	2	3	0	0	0	0	0	0	0	0	0	0	0	0	0	0	0	23
d__Bacteria	k__norank_d__Bacteria	p__unclassified_k__norank_d__Bacteria	c__unclassified_k__norank_d__Bacteria	o__unclassified_k__norank_d__Bacteria	f__unclassified_k__norank_d__Bacteria	g__unclassified_k__norank_d__Bacteria	s__unclassified_k__norank_d__Bacteria	ASV69203	0	0	0	0	0	0	0	0	0	0	0	0	0	0	0	1	0	0	0	0	0	0	0	0	0	0	0	0	0	0	0	0	0	0	0	0	0	0	0	0	0
d__Bacteria	k__norank_d__Bacteria	p__Actinobacteriota	c__Actinobacteria	o__unclassified_c__Actinobacteria	f__unclassified_c__Actinobacteria	g__unclassified_c__Actinobacteria	s__unclassified_c__Actinobacteria	ASV59358	0	0	0	0	0	0	0	0	0	0	0	0	0	0	0	0	0	0	0	0	0	0	0	0	0	0	0	0	0	0	0	0	0	0	0	0	0	0	0	0	0
d__Bacteria	k__norank_d__Bacteria	p__unclassified_k__norank_d__Bacteria	c__unclassified_k__norank_d__Bacteria	o__unclassified_k__norank_d__Bacteria	f__unclassified_k__norank_d__Bacteria	g__unclassified_k__norank_d__Bacteria	s__unclassified_k__norank_d__Bacteria	ASV6023	0	0	0	0	0	0	0	0	0	0	0	0	0	0	1	0	0	0	0	0	0	0	0	0	0	0	0	0	0	0	0	0	0	0	0	0	0	0	0	0	0
d__Bacteria	k__norank_d__Bacteria	p__Myxococcota	c__Polyangia	o__Haliangiales	f__Haliangiaceae	g__Haliangium	s__unclassified_g__Haliangium	ASV3991	0	0	0	0	0	0	0	0	0	4	0	0	0	0	5	0	0	0	0	0	0	0	0	0	0	0	0	0	0	0	0	0	0	0	0	0	0	0	0	0	0
d__Bacteria	k__norank_d__Bacteria	p__unclassified_k__norank_d__Bacteria	c__unclassified_k__norank_d__Bacteria	o__unclassified_k__norank_d__Bacteria	f__unclassified_k__norank_d__Bacteria	g__unclassified_k__norank_d__Bacteria	s__unclassified_k__norank_d__Bacteria	ASV55370	0	0	0	0	0	0	0	0	0	0	0	0	0	0	0	0	0	0	0	0	0	0	0	0	0	0	0	0	0	0	0	0	0	0	0	0	0	0	0	0	0
d__Bacteria	k__norank_d__Bacteria	p__Patescibacteria	c__WWE3	o__norank_c__WWE3	f__norank_c__WWE3	g__norank_c__WWE3	s__uncultured_bacterium_c__WWE3	ASV100277	0	0	0	0	0	0	0	0	0	0	0	0	0	0	0	0	2	0	0	0	0	0	0	0	0	0	0	0	0	0	0	0	0	0	0	0	0	0	0	0	0
d__Bacteria	k__norank_d__Bacteria	p__Proteobacteria	c__Gammaproteobacteria	o__unclassified_c__Gammaproteobacteria	f__unclassified_c__Gammaproteobacteria	g__unclassified_c__Gammaproteobacteria	s__unclassified_c__Gammaproteobacteria	ASV40717	0	0	0	0	0	0	0	0	0	0	0	0	0	0	0	0	0	0	0	0	0	0	0	0	0	0	0	0	0	0	0	0	0	0	0	0	0	2	0	0	0
d__Bacteria	k__norank_d__Bacteria	p__Planctomycetota	c__OM190	o__norank_c__OM190	f__norank_c__OM190	g__norank_c__OM190	s__unclassified_g__norank_c__OM190	ASV27858	0	0	0	0	0	0	0	0	0	0	0	0	0	0	0	0	0	0	0	0	0	0	0	0	0	0	0	0	0	0	0	0	0	3	0	0	0	0	0	0	0
d__Bacteria	k__norank_d__Bacteria	p__Proteobacteria	c__Gammaproteobacteria	o__Diplorickettsiales	f__Diplorickettsiaceae	g__Aquicella	s__unclassified_g__Aquicella	ASV49924	0	0	0	0	0	0	0	0	0	3	0	0	0	0	0	0	0	0	0	0	0	0	0	0	0	0	0	0	0	0	0	0	0	0	0	0	0	0	0	0	0
d__Bacteria	k__norank_d__Bacteria	p__Proteobacteria	c__Alphaproteobacteria	o__Rhodobacterales	f__Rhodobacteraceae	g__Pseudoruegeria	s__unclassified_g__Pseudoruegeria	ASV65013	0	0	25	0	0	10	0	0	0	0	0	0	0	0	0	0	0	0	0	0	0	0	0	0	0	0	0	0	0	0	0	0	0	0	0	0	0	0	0	0	0
d__Bacteria	k__norank_d__Bacteria	p__Bacteroidota	c__Rhodothermia	o__Rhodothermales	f__Rhodothermaceae	g__norank_f__Rhodothermaceae	s__unclassified_g__norank_f__Rhodothermaceae	ASV16345	0	0	0	0	0	0	0	0	0	0	0	0	0	0	0	0	0	0	0	0	0	0	0	0	0	0	12	0	0	0	0	0	0	0	0	0	0	0	0	0	0
d__Bacteria	k__norank_d__Bacteria	p__Firmicutes	c__Bacilli	o__Bacillales	f__Bacillaceae	g__unclassified_f__Bacillaceae	s__unclassified_f__Bacillaceae	ASV84949	0	0	0	0	0	0	0	0	0	0	0	0	0	0	0	0	0	0	0	0	0	0	0	0	0	0	0	0	0	0	0	0	0	0	0	0	0	0	0	0	0
d__Bacteria	k__norank_d__Bacteria	p__Acidobacteriota	c__Vicinamibacteria	o__Vicinamibacterales	f__norank_o__Vicinamibacterales	g__norank_o__Vicinamibacterales	s__unclassified_g__norank_o__Vicinamibacterales	ASV16669	0	0	0	0	0	0	0	0	0	0	0	0	0	0	0	0	0	0	0	0	0	0	0	0	0	7	8	0	0	40	0	0	0	0	0	0	0	0	0	0	0
d__Bacteria	k__norank_d__Bacteria	p__Desulfobacterota	c__Desulfobacteria	o__Desulfatiglandales	f__Desulfatiglandaceae	g__Desulfatiglans	s__unclassified_g__Desulfatiglans	ASV20505	0	0	0	0	0	0	0	0	0	0	0	0	0	0	0	0	0	0	0	0	0	0	0	0	0	0	0	0	0	0	0	0	0	0	1	0	0	0	0	0	0
d__Bacteria	k__norank_d__Bacteria	p__Bacteroidota	c__Bacteroidia	o__Flavobacteriales	f__Flavobacteriaceae	g__unclassified_f__Flavobacteriaceae	s__unclassified_f__Flavobacteriaceae	ASV19855	0	0	0	0	0	0	0	0	0	0	0	0	0	0	0	0	0	0	0	0	0	0	0	0	0	0	0	0	0	0	0	0	0	0	8	0	0	0	0	0	0
d__Bacteria	k__norank_d__Bacteria	p__Firmicutes	c__Clostridia	o__Lachnospirales	f__Defluviitaleaceae	g__Defluviitalea	s__uncultured_organism_g__Defluviitalea	ASV83065	0	0	0	0	0	0	0	0	0	0	0	0	0	0	0	0	0	0	0	0	0	0	0	0	0	0	0	0	0	0	4	0	0	0	0	0	0	0	0	0	0
d__Bacteria	k__norank_d__Bacteria	p__Myxococcota	c__Polyangia	o__Polyangiales	f__Phaselicystidaceae	g__Phaselicystis	s__unclassified_g__Phaselicystis	ASV87192	0	0	0	0	0	0	0	0	0	0	0	0	0	0	0	0	0	0	0	0	0	0	0	3	0	0	0	0	0	0	0	0	0	0	0	0	0	0	0	0	0
d__Bacteria	k__norank_d__Bacteria	p__Proteobacteria	c__Alphaproteobacteria	o__unclassified_c__Alphaproteobacteria	f__unclassified_c__Alphaproteobacteria	g__unclassified_c__Alphaproteobacteria	s__unclassified_c__Alphaproteobacteria	ASV90449	0	0	0	0	0	0	0	0	0	0	0	0	0	0	0	0	0	0	0	0	4	0	0	0	0	0	0	0	0	0	0	0	0	0	0	0	0	0	0	0	0
d__Bacteria	k__norank_d__Bacteria	p__Bacteroidota	c__Bacteroidia	o__Flavobacteriales	f__Flavobacteriaceae	g__Aestuariibaculum	s__unclassified_g__Aestuariibaculum	ASV21339	0	0	0	0	0	0	0	0	0	0	0	0	0	0	0	43	36	36	0	0	113	0	0	0	0	0	0	0	0	0	0	0	0	0	0	0	0	0	0	0	0
d__Bacteria	k__norank_d__Bacteria	p__Zixibacteria	c__norank_p__Zixibacteria	o__norank_p__Zixibacteria	f__norank_p__Zixibacteria	g__norank_p__Zixibacteria	s__uncultured_bacterium_p__Zixibacteria	ASV73485	0	0	0	0	0	0	0	0	0	0	0	0	0	0	0	0	0	0	0	0	0	0	0	0	0	1	0	0	0	0	0	0	0	0	0	0	0	0	0	0	0
d__Bacteria	k__norank_d__Bacteria	p__Proteobacteria	c__Gammaproteobacteria	o__unclassified_c__Gammaproteobacteria	f__unclassified_c__Gammaproteobacteria	g__unclassified_c__Gammaproteobacteria	s__unclassified_c__Gammaproteobacteria	ASV64830	0	0	0	0	0	0	0	0	0	0	0	0	0	0	0	0	0	0	0	0	0	0	0	0	0	0	0	0	0	0	0	0	0	0	0	0	0	0	0	0	0
d__Bacteria	k__norank_d__Bacteria	p__Acidobacteriota	c__Vicinamibacteria	o__Subgroup_17	f__norank_o__Subgroup_17	g__norank_o__Subgroup_17	s__uncultured_bacterium_o__Subgroup_17	ASV9922	0	0	0	0	0	0	0	0	0	0	0	0	0	0	0	0	0	0	0	0	0	0	0	0	0	0	0	0	2	0	0	0	0	0	0	0	0	0	0	0	0
d__Bacteria	k__norank_d__Bacteria	p__Desulfobacterota	c__Desulfobulbia	o__Desulfobulbales	f__Desulfobulbaceae	g__unclassified_f__Desulfobulbaceae	s__unclassified_f__Desulfobulbaceae	ASV11458	0	0	0	0	0	0	0	0	0	0	0	0	5	0	0	0	0	0	0	0	0	0	0	0	0	0	0	0	0	0	0	0	0	0	0	0	0	0	0	0	0
d__Bacteria	k__norank_d__Bacteria	p__Bacteroidota	c__Bacteroidia	o__Cytophagales	f__Cyclobacteriaceae	g__norank_f__Cyclobacteriaceae	s__unclassified_g__norank_f__Cyclobacteriaceae	ASV53928	0	0	0	0	0	0	0	0	0	0	0	0	0	0	0	0	0	0	0	0	0	0	0	0	0	0	0	0	0	0	0	0	0	0	0	0	0	0	0	0	0
d__Bacteria	k__norank_d__Bacteria	p__Acidobacteriota	c__Acidobacteriae	o__PAUC26f	f__norank_o__PAUC26f	g__norank_o__PAUC26f	s__uncultured_Acidobacteriales_bacterium_o__PAUC26f	ASV51521	13	12	0	0	0	0	0	0	0	0	0	0	0	0	0	0	0	0	0	0	0	0	0	0	0	0	0	0	0	0	0	0	0	0	0	0	0	0	0	0	0
d__Bacteria	k__norank_d__Bacteria	p__Chloroflexi	c__unclassified_p__Chloroflexi	o__unclassified_p__Chloroflexi	f__unclassified_p__Chloroflexi	g__unclassified_p__Chloroflexi	s__unclassified_p__Chloroflexi	ASV13354	0	0	0	0	0	0	0	0	0	0	0	0	2	0	0	0	0	0	0	0	0	0	0	0	0	0	0	0	0	0	0	0	0	0	0	0	0	0	0	0	0
d__Bacteria	k__norank_d__Bacteria	p__Bacteroidota	c__Bacteroidia	o__Cytophagales	f__Cyclobacteriaceae	g__norank_f__Cyclobacteriaceae	s__Flammeovirgaceae_bacterium_GY-1	ASV8141	0	0	0	0	0	0	0	0	0	0	0	0	0	0	0	0	0	8	0	0	0	12	8	5	33	8	8	11	10	22	0	0	0	2	0	0	8	9	17	0	0
d__Bacteria	k__norank_d__Bacteria	p__Acidobacteriota	c__Subgroup_22	o__norank_c__Subgroup_22	f__norank_c__Subgroup_22	g__norank_c__Subgroup_22	s__uncultured_bacterium_c__Subgroup_22	ASV8400	0	0	0	0	0	0	0	0	0	0	0	0	0	0	0	0	0	0	0	0	0	0	0	0	0	0	0	0	5	0	0	0	0	0	0	0	0	0	0	0	0
d__Bacteria	k__norank_d__Bacteria	p__unclassified_k__norank_d__Bacteria	c__unclassified_k__norank_d__Bacteria	o__unclassified_k__norank_d__Bacteria	f__unclassified_k__norank_d__Bacteria	g__unclassified_k__norank_d__Bacteria	s__unclassified_k__norank_d__Bacteria	ASV6262	0	0	0	0	0	0	0	0	0	0	0	0	0	0	1	0	0	0	0	0	0	0	0	0	0	0	0	0	0	0	0	0	0	0	0	0	0	0	0	0	0
d__Bacteria	k__norank_d__Bacteria	p__Chloroflexi	c__Anaerolineae	o__Anaerolineales	f__Anaerolineaceae	g__Anaerolineaceae_UCG-001	s__uncultured_Chloroflexi_bacterium_g__Anaerolineaceae_UCG-001	ASV32132	0	0	0	0	0	0	0	0	0	0	0	0	0	0	0	0	0	0	0	0	0	0	0	0	0	0	0	0	0	0	0	0	0	0	0	0	2	0	0	0	0
d__Bacteria	k__norank_d__Bacteria	p__Actinobacteriota	c__Actinobacteria	o__Corynebacteriales	f__Mycobacteriaceae	g__Mycobacterium	s__unclassified_g__Mycobacterium	ASV62266	0	0	0	0	0	0	0	0	0	0	0	0	0	1	0	0	0	0	0	0	0	0	0	0	0	0	0	0	0	0	0	0	0	0	0	0	0	0	0	0	0
d__Bacteria	k__norank_d__Bacteria	p__Proteobacteria	c__Gammaproteobacteria	o__Burkholderiales	f__Rhodocyclaceae	g__unclassified_f__Rhodocyclaceae	s__unclassified_f__Rhodocyclaceae	ASV24654	0	0	0	0	0	0	0	0	0	0	0	0	0	0	0	0	0	2	0	0	0	0	0	0	0	0	0	0	0	0	0	0	0	0	0	0	0	0	0	0	0
d__Bacteria	k__norank_d__Bacteria	p__Calditrichota	c__Calditrichia	o__Calditrichales	f__Calditrichaceae	g__unclassified_f__Calditrichaceae	s__unclassified_f__Calditrichaceae	ASV97649	0	0	0	0	0	0	0	0	0	0	0	0	0	0	0	0	0	0	0	0	0	0	0	0	5	0	0	0	0	0	0	0	0	0	0	0	0	0	0	0	0
d__Bacteria	k__norank_d__Bacteria	p__Proteobacteria	c__Gammaproteobacteria	o__unclassified_c__Gammaproteobacteria	f__unclassified_c__Gammaproteobacteria	g__unclassified_c__Gammaproteobacteria	s__unclassified_c__Gammaproteobacteria	ASV23355	0	0	0	0	0	0	0	0	0	0	0	0	0	0	0	0	0	3	0	0	0	0	0	0	0	0	0	0	0	0	0	0	0	0	0	0	0	0	0	0	0
d__Bacteria	k__norank_d__Bacteria	p__Chloroflexi	c__Anaerolineae	o__unclassified_c__Anaerolineae	f__unclassified_c__Anaerolineae	g__unclassified_c__Anaerolineae	s__unclassified_c__Anaerolineae	ASV76097	0	0	0	0	0	0	0	0	0	0	0	0	0	0	0	0	0	0	0	0	0	0	0	0	0	0	0	0	0	0	0	0	0	0	0	0	0	0	0	1	0
d__Bacteria	k__norank_d__Bacteria	p__Chloroflexi	c__Anaerolineae	o__SBR1031	f__A4b	g__norank_f__A4b	s__unclassified_g__norank_f__A4b	ASV48013	0	0	0	0	0	0	0	0	2	0	0	0	0	0	0	0	0	0	0	0	0	0	0	0	0	0	0	0	0	0	0	0	0	0	0	0	0	0	0	0	0
d__Bacteria	k__norank_d__Bacteria	p__Acidobacteriota	c__Subgroup_18	o__norank_c__Subgroup_18	f__norank_c__Subgroup_18	g__norank_c__Subgroup_18	s__uncultured_bacterium_c__Subgroup_18	ASV96972	0	0	0	0	0	0	0	0	0	0	0	0	0	0	0	0	0	0	0	0	0	0	0	0	0	0	0	0	0	0	0	0	0	0	0	0	0	0	0	0	1
d__Bacteria	k__norank_d__Bacteria	p__unclassified_k__norank_d__Bacteria	c__unclassified_k__norank_d__Bacteria	o__unclassified_k__norank_d__Bacteria	f__unclassified_k__norank_d__Bacteria	g__unclassified_k__norank_d__Bacteria	s__unclassified_k__norank_d__Bacteria	ASV20478	0	0	0	0	0	0	0	0	0	0	0	0	0	0	0	0	0	0	0	0	0	0	0	0	0	0	0	0	0	0	0	0	0	0	2	0	0	0	0	0	0
d__Bacteria	k__norank_d__Bacteria	p__Proteobacteria	c__Alphaproteobacteria	o__Tistrellales	f__Geminicoccaceae	g__norank_f__Geminicoccaceae	s__uncultured_bacterium_f__Geminicoccaceae	ASV29780	0	0	0	0	0	0	0	0	0	0	0	0	0	0	0	0	0	0	0	0	0	0	3	0	0	0	0	0	0	0	0	0	3	0	0	0	0	0	0	0	0
d__Bacteria	k__norank_d__Bacteria	p__Verrucomicrobiota	c__Verrucomicrobiae	o__Verrucomicrobiales	f__DEV007	g__norank_f__DEV007	s__unclassified_g__norank_f__DEV007	ASV79928	0	0	0	0	0	0	0	0	0	0	0	0	0	0	0	0	0	0	0	0	0	0	0	0	0	0	0	0	0	8	0	0	0	0	0	0	0	0	0	0	0
d__Bacteria	k__norank_d__Bacteria	p__Bacteroidota	c__Ignavibacteria	o__Ignavibacteriales	f__PHOS-HE36	g__norank_f__PHOS-HE36	s__unclassified_g__norank_f__PHOS-HE36	ASV15178	0	0	0	0	0	0	0	4	0	0	0	0	0	0	0	0	0	0	0	0	0	0	0	0	0	0	0	0	0	0	0	0	0	0	0	0	0	0	0	0	0
d__Bacteria	k__norank_d__Bacteria	p__Proteobacteria	c__Gammaproteobacteria	o__Gammaproteobacteria_Incertae_Sedis	f__unclassified_o__Gammaproteobacteria_Incertae_Sedis	g__norank_f__unclassified_o__Gammaproteobacteria_Incertae_Sedis	s__unclassified_g__norank_f__unclassified_o__Gammaproteobacteria_Incertae_Sedis	ASV89840	0	0	0	0	0	0	0	0	0	0	0	0	0	0	0	0	0	0	0	0	20	0	0	0	0	0	0	0	0	0	0	0	0	0	0	0	0	0	0	0	0
d__Bacteria	k__norank_d__Bacteria	p__Actinobacteriota	c__Actinobacteria	o__Corynebacteriales	f__Mycobacteriaceae	g__Mycobacterium	s__unclassified_g__Mycobacterium	ASV4032	0	0	0	0	0	0	0	0	0	4	0	0	0	0	5	0	0	0	0	0	0	0	0	0	0	0	0	0	0	0	0	0	0	0	0	0	0	0	0	0	0
d__Bacteria	k__norank_d__Bacteria	p__Proteobacteria	c__Gammaproteobacteria	o__Alteromonadales	f__Marinobacteraceae	g__Marinobacter	s__unclassified_g__Marinobacter	ASV37341	0	0	0	0	0	0	0	0	0	0	0	0	0	0	0	0	0	0	11	0	0	0	0	0	0	0	0	0	0	0	0	0	0	0	0	0	0	0	0	0	0
d__Bacteria	k__norank_d__Bacteria	p__Proteobacteria	c__Alphaproteobacteria	o__Rhodobacterales	f__Rhodobacteraceae	g__unclassified_f__Rhodobacteraceae	s__unclassified_f__Rhodobacteraceae	ASV82195	0	0	0	0	0	0	0	0	0	0	0	0	0	0	0	0	0	0	0	0	0	0	0	0	0	0	0	0	0	0	0	0	0	0	0	0	0	0	1	0	0
d__Bacteria	k__norank_d__Bacteria	p__Proteobacteria	c__Alphaproteobacteria	o__Rhizobiales	f__unclassified_o__Rhizobiales	g__unclassified_o__Rhizobiales	s__unclassified_o__Rhizobiales	ASV94323	0	0	0	0	0	0	0	0	0	0	0	0	0	0	0	0	0	0	0	0	0	0	0	0	0	0	0	0	0	0	0	0	0	0	0	0	0	0	0	0	0
d__Bacteria	k__norank_d__Bacteria	p__Chloroflexi	c__Anaerolineae	o__norank_c__Anaerolineae	f__norank_c__Anaerolineae	g__norank_c__Anaerolineae	s__unclassified_g__norank_c__Anaerolineae	ASV3231	0	0	0	0	0	0	0	0	0	10	11	16	0	40	14	0	0	0	0	0	0	0	0	0	0	0	0	0	0	0	0	0	0	0	0	0	0	0	0	0	0
d__Bacteria	k__norank_d__Bacteria	p__Patescibacteria	c__ABY1	o__Candidatus_Falkowbacteria	f__norank_o__Candidatus_Falkowbacteria	g__norank_o__Candidatus_Falkowbacteria	s__uncultured_bacterium_o__Candidatus_Falkowbacteria	ASV64250	0	0	0	0	0	0	0	0	0	0	0	0	0	0	0	0	0	0	0	0	0	0	0	0	0	0	0	0	0	0	0	0	0	0	0	0	0	0	0	0	0
d__Bacteria	k__norank_d__Bacteria	p__Acidobacteriota	c__Subgroup_22	o__norank_c__Subgroup_22	f__norank_c__Subgroup_22	g__norank_c__Subgroup_22	s__unclassified_g__norank_c__Subgroup_22	ASV70550	0	0	0	0	0	0	0	0	0	0	4	0	0	0	0	0	0	0	0	0	0	0	0	0	0	0	0	0	0	0	0	0	0	0	0	0	0	0	0	0	0
d__Bacteria	k__norank_d__Bacteria	p__Proteobacteria	c__Gammaproteobacteria	o__unclassified_c__Gammaproteobacteria	f__unclassified_c__Gammaproteobacteria	g__unclassified_c__Gammaproteobacteria	s__unclassified_c__Gammaproteobacteria	ASV27896	0	0	0	0	0	0	0	0	0	0	0	0	0	0	0	0	0	0	0	0	0	0	0	0	0	0	0	0	0	0	0	0	0	4	0	0	0	0	0	0	0
d__Bacteria	k__norank_d__Bacteria	p__Proteobacteria	c__Gammaproteobacteria	o__unclassified_c__Gammaproteobacteria	f__unclassified_c__Gammaproteobacteria	g__unclassified_c__Gammaproteobacteria	s__unclassified_c__Gammaproteobacteria	ASV42505	0	0	0	0	0	0	0	0	0	0	0	0	0	0	0	0	0	0	0	1	0	0	0	0	0	0	0	0	0	0	0	0	0	0	0	0	0	0	0	0	0
d__Bacteria	k__norank_d__Bacteria	p__Planctomycetota	c__Planctomycetes	o__Gemmatales	f__Gemmataceae	g__norank_f__Gemmataceae	s__uncultured_bacterium_f__Gemmataceae	ASV8936	0	0	0	0	0	0	0	0	0	0	0	0	0	0	0	0	0	0	0	0	0	0	0	0	0	0	0	3	4	8	0	0	0	0	0	0	0	0	0	0	0
d__Bacteria	k__norank_d__Bacteria	p__Firmicutes	c__Bacilli	o__Acholeplasmatales	f__Acholeplasmataceae	g__Acholeplasma	s__unclassified_g__Acholeplasma	ASV22207	0	0	0	0	0	0	0	0	0	0	0	0	0	0	0	0	0	5	0	0	0	0	0	0	0	0	0	0	0	0	0	0	0	0	0	0	0	0	0	0	0
d__Bacteria	k__norank_d__Bacteria	p__Gemmatimonadota	c__S0134_terrestrial_group	o__norank_c__S0134_terrestrial_group	f__norank_c__S0134_terrestrial_group	g__norank_c__S0134_terrestrial_group	s__uncultured_Gemmatimonadetes_bacterium_c__S0134_terrestrial_group	ASV19382	0	0	0	0	0	0	0	0	0	0	0	0	0	0	0	0	0	0	0	0	0	0	0	0	0	0	1	0	0	0	0	0	0	0	0	0	0	0	0	0	0
d__Bacteria	k__norank_d__Bacteria	p__Cyanobacteria	c__Cyanobacteriia	o__Synechococcales	f__Cyanobiaceae	g__Cyanobium_PCC-6307	s__unclassified_g__Cyanobium_PCC-6307	ASV60385	0	0	0	0	0	0	0	0	0	0	0	0	0	0	0	0	0	0	0	0	0	0	0	0	0	0	0	0	0	0	0	0	0	0	0	0	0	0	0	0	0
d__Bacteria	k__norank_d__Bacteria	p__Proteobacteria	c__Gammaproteobacteria	o__unclassified_c__Gammaproteobacteria	f__unclassified_c__Gammaproteobacteria	g__unclassified_c__Gammaproteobacteria	s__unclassified_c__Gammaproteobacteria	ASV53184	1	0	0	0	0	0	0	0	0	0	0	0	0	0	0	0	0	0	0	0	0	0	0	0	0	0	0	0	0	0	0	0	0	0	0	0	0	0	0	0	0
d__Bacteria	k__norank_d__Bacteria	p__Proteobacteria	c__Gammaproteobacteria	o__unclassified_c__Gammaproteobacteria	f__unclassified_c__Gammaproteobacteria	g__unclassified_c__Gammaproteobacteria	s__unclassified_c__Gammaproteobacteria	ASV38934	0	0	0	0	0	0	0	0	0	0	0	0	0	0	0	0	0	0	2	0	0	0	0	0	0	0	0	0	0	0	0	0	0	0	0	0	0	0	0	0	0
d__Bacteria	k__norank_d__Bacteria	p__Patescibacteria	c__Gracilibacteria	o__Candidatus_Abawacabacteria	f__norank_o__Candidatus_Abawacabacteria	g__norank_o__Candidatus_Abawacabacteria	s__uncultured_organism_o__Candidatus_Abawacabacteria	ASV97753	0	0	0	0	0	0	0	0	0	0	0	0	0	0	0	0	0	0	0	0	0	0	0	0	1	0	0	0	0	0	0	0	0	0	0	0	0	0	0	0	0
d__Bacteria	k__norank_d__Bacteria	p__Deinococcota	c__Deinococci	o__Deinococcales	f__Trueperaceae	g__Truepera	s__uncultured_bacterium_g__Truepera	ASV37259	0	0	0	0	0	0	0	0	0	0	0	0	0	0	0	0	0	0	13	0	12	0	0	0	0	0	0	0	0	0	0	0	0	0	0	0	0	0	0	0	0
d__Bacteria	k__norank_d__Bacteria	p__Proteobacteria	c__Gammaproteobacteria	o__Thiohalorhabdales	f__Thiohalorhabdaceae	g__norank_f__Thiohalorhabdaceae	s__uncultured_bacterium_f__Thiohalorhabdaceae	ASV3613	0	0	0	0	0	0	0	0	0	2	0	0	0	0	7	0	0	0	0	0	0	0	0	0	0	0	0	0	0	0	0	0	0	0	0	0	0	0	0	0	0
d__Bacteria	k__norank_d__Bacteria	p__Chloroflexi	c__Anaerolineae	o__SBR1031	f__norank_o__SBR1031	g__norank_o__SBR1031	s__unclassified_g__norank_o__SBR1031	ASV37131	16	0	0	0	0	0	0	0	0	0	0	0	0	0	0	0	0	0	22	24	37	0	0	0	0	0	0	0	0	0	0	0	0	0	0	0	0	0	0	0	0
d__Bacteria	k__norank_d__Bacteria	p__Firmicutes	c__Clostridia	o__Peptostreptococcales-Tissierellales	f__Peptostreptococcaceae	g__unclassified_f__Peptostreptococcaceae	s__unclassified_f__Peptostreptococcaceae	ASV1123	0	0	0	0	0	0	0	0	0	0	0	0	0	0	0	0	0	0	0	0	0	0	0	0	0	0	0	0	0	0	0	0	0	0	0	0	0	0	0	0	0
d__Bacteria	k__norank_d__Bacteria	p__Myxococcota	c__Myxococcia	o__Myxococcales	f__Myxococcaceae	g__KD3-10	s__unclassified_g__KD3-10	ASV46358	0	0	0	1	0	0	0	0	0	0	0	0	0	0	0	0	0	0	0	0	0	0	0	0	0	0	0	0	0	0	0	0	0	0	0	0	0	0	0	0	0
d__Bacteria	k__norank_d__Bacteria	p__Actinobacteriota	c__unclassified_p__Actinobacteriota	o__unclassified_p__Actinobacteriota	f__unclassified_p__Actinobacteriota	g__unclassified_p__Actinobacteriota	s__unclassified_p__Actinobacteriota	ASV52075	3	0	0	0	0	0	0	0	0	0	0	0	0	0	0	0	0	0	0	0	0	0	0	0	0	0	0	0	0	0	0	0	0	0	0	0	0	0	0	0	0
d__Bacteria	k__norank_d__Bacteria	p__Proteobacteria	c__Alphaproteobacteria	o__Rhodobacterales	f__Rhodobacteraceae	g__unclassified_f__Rhodobacteraceae	s__unclassified_f__Rhodobacteraceae	ASV29096	0	0	0	0	0	0	0	0	0	0	0	0	0	0	0	0	0	0	0	0	0	0	13	0	0	0	0	0	0	0	0	0	0	0	0	0	0	0	0	0	0
d__Bacteria	k__norank_d__Bacteria	p__NB1-j	c__norank_p__NB1-j	o__norank_p__NB1-j	f__norank_p__NB1-j	g__norank_p__NB1-j	s__unclassified_g__norank_p__NB1-j	ASV97999	0	0	0	0	0	0	0	0	0	0	0	0	0	0	0	0	0	0	0	0	0	0	0	0	1	0	0	0	0	0	0	0	0	0	0	0	0	0	0	0	0
d__Bacteria	k__norank_d__Bacteria	p__Chloroflexi	c__Anaerolineae	o__SBR1031	f__norank_o__SBR1031	g__norank_o__SBR1031	s__unclassified_g__norank_o__SBR1031	ASV14383	6	16	17	15	80	5	40	14	19	0	0	0	0	0	0	0	0	0	0	0	0	0	0	0	0	0	0	0	0	0	0	0	0	0	0	0	0	0	0	0	0
d__Bacteria	k__norank_d__Bacteria	p__Actinobacteriota	c__Actinobacteria	o__Micrococcales	f__unclassified_o__Micrococcales	g__unclassified_o__Micrococcales	s__unclassified_o__Micrococcales	ASV13510	0	0	0	0	0	0	0	0	0	0	0	0	2	0	0	0	0	0	0	0	0	0	0	0	0	0	0	0	0	0	0	0	0	0	0	0	0	0	0	0	0
d__Bacteria	k__norank_d__Bacteria	p__Bacteroidota	c__Bacteroidia	o__Flavobacteriales	f__Flavobacteriaceae	g__unclassified_f__Flavobacteriaceae	s__unclassified_f__Flavobacteriaceae	ASV90575	0	0	0	0	0	0	0	0	0	0	0	0	0	0	0	0	0	0	0	0	4	0	0	0	0	0	0	0	0	0	0	0	0	0	0	0	0	0	0	0	0
d__Bacteria	k__norank_d__Bacteria	p__Proteobacteria	c__Alphaproteobacteria	o__Sphingomonadales	f__Sphingomonadaceae	g__Novosphingobium	s__unclassified_g__Novosphingobium	ASV2497	0	0	0	0	0	0	0	0	0	0	0	0	0	0	0	0	0	0	0	0	0	0	0	0	0	0	0	0	0	0	0	0	0	0	0	0	0	0	0	0	0
d__Bacteria	k__norank_d__Bacteria	p__Actinobacteriota	c__Actinobacteria	o__Frankiales	f__Nakamurellaceae	g__Nakamurella	s__unclassified_g__Nakamurella	ASV88612	0	0	0	0	0	0	0	0	0	0	0	0	0	0	0	0	0	0	0	0	0	0	0	0	0	0	0	0	0	0	0	0	0	0	0	0	0	0	0	0	0
d__Bacteria	k__norank_d__Bacteria	p__Proteobacteria	c__Alphaproteobacteria	o__unclassified_c__Alphaproteobacteria	f__unclassified_c__Alphaproteobacteria	g__unclassified_c__Alphaproteobacteria	s__unclassified_c__Alphaproteobacteria	ASV28285	0	0	0	0	0	0	0	0	0	0	0	0	0	0	0	0	0	0	0	0	0	0	0	0	0	0	0	0	0	0	0	0	0	3	0	0	0	0	0	0	0
d__Bacteria	k__norank_d__Bacteria	p__Actinobacteriota	c__Actinobacteria	o__Nitriliruptorales	f__Nitriliruptoraceae	g__unclassified_f__Nitriliruptoraceae	s__unclassified_f__Nitriliruptoraceae	ASV83261	0	0	0	0	0	0	0	0	0	0	0	0	0	0	0	0	0	0	0	0	0	0	0	0	0	0	0	0	0	0	2	0	0	0	0	0	0	0	0	0	0
d__Bacteria	k__norank_d__Bacteria	p__Planctomycetota	c__Planctomycetes	o__Isosphaerales	f__Isosphaeraceae	g__unclassified_f__Isosphaeraceae	s__unclassified_f__Isosphaeraceae	ASV92635	0	0	0	0	0	0	0	0	0	0	0	5	0	0	0	0	0	0	0	0	0	0	0	0	0	0	0	0	0	0	0	0	0	0	0	0	0	0	0	0	0
d__Bacteria	k__norank_d__Bacteria	p__Bdellovibrionota	c__Oligoflexia	o__Oligoflexales	f__norank_o__Oligoflexales	g__unclassified_f__norank_o__Oligoflexales	s__unclassified_f__norank_o__Oligoflexales	ASV76715	0	0	0	0	0	0	0	0	0	0	0	0	0	0	0	0	0	0	0	0	0	0	0	0	0	0	0	0	0	0	0	0	0	0	0	0	0	0	0	0	0
d__Bacteria	k__norank_d__Bacteria	p__Acidobacteriota	c__Holophagae	o__Subgroup_7	f__norank_o__Subgroup_7	g__norank_o__Subgroup_7	s__unclassified_g__norank_o__Subgroup_7	ASV24918	0	0	0	0	0	0	0	0	0	0	0	0	0	0	0	0	0	2	0	0	0	0	0	0	0	0	0	0	0	0	0	0	0	0	0	0	0	0	0	0	0
d__Bacteria	k__norank_d__Bacteria	p__Proteobacteria	c__Gammaproteobacteria	o__Pseudomonadales	f__Moraxellaceae	g__Acinetobacter	s__unclassified_g__Acinetobacter	ASV59498	0	0	0	0	0	0	0	0	0	0	0	0	0	0	0	0	0	0	0	0	0	0	0	0	0	0	0	0	0	0	0	0	0	0	0	0	0	0	0	0	0
d__Bacteria	k__norank_d__Bacteria	p__Nitrospirota	c__Nitrospiria	o__Nitrospirales	f__Nitrospiraceae	g__Nitrospira	s__unclassified_g__Nitrospira	ASV51414	0	0	0	0	2	0	0	0	0	0	0	0	0	0	0	0	0	0	0	0	0	0	0	0	0	0	0	0	0	0	0	0	0	0	0	0	0	0	0	0	0
d__Bacteria	k__norank_d__Bacteria	p__Planctomycetota	c__vadinHA49	o__norank_c__vadinHA49	f__norank_c__vadinHA49	g__norank_c__vadinHA49	s__uncultured_bacterium_c__vadinHA49	ASV26438	0	0	0	0	0	0	0	0	0	0	0	0	0	0	0	0	0	0	0	0	0	3	0	0	0	0	0	0	0	0	0	0	0	0	0	0	0	0	0	0	0
d__Bacteria	k__norank_d__Bacteria	p__Patescibacteria	c__ABY1	o__Candidatus_Kerfeldbacteria	f__norank_o__Candidatus_Kerfeldbacteria	g__norank_o__Candidatus_Kerfeldbacteria	s__uncultured_bacterium_o__Candidatus_Kerfeldbacteria	ASV18010	0	0	0	0	0	0	0	0	0	0	0	0	0	0	0	0	0	0	0	0	0	0	0	0	0	0	2	0	0	0	0	0	0	0	0	0	0	0	0	0	0
d__Bacteria	k__norank_d__Bacteria	p__Chloroflexi	c__Anaerolineae	o__Caldilineales	f__Caldilineaceae	g__norank_f__Caldilineaceae	s__unclassified_g__norank_f__Caldilineaceae	ASV16703	0	0	0	0	0	0	0	0	0	0	0	0	0	0	0	0	0	0	0	0	0	0	4	2	0	14	8	0	0	0	0	2	0	0	0	0	0	0	0	0	0
d__Bacteria	k__norank_d__Bacteria	p__Proteobacteria	c__Gammaproteobacteria	o__Competibacterales	f__Competibacteraceae	g__Candidatus_Competibacter	s__unclassified_g__Candidatus_Competibacter	ASV95184	0	0	0	0	0	0	0	0	0	0	0	0	0	0	0	0	0	0	0	0	0	0	0	0	0	0	0	0	0	0	0	0	0	0	0	0	0	0	0	0	0
d__Bacteria	k__norank_d__Bacteria	p__Proteobacteria	c__Gammaproteobacteria	o__unclassified_c__Gammaproteobacteria	f__unclassified_c__Gammaproteobacteria	g__unclassified_c__Gammaproteobacteria	s__unclassified_c__Gammaproteobacteria	ASV83363	0	0	0	0	0	0	0	0	0	0	0	0	0	0	0	0	0	0	0	0	0	0	0	0	0	0	0	0	0	0	4	0	0	0	0	0	0	0	0	0	0
d__Bacteria	k__norank_d__Bacteria	p__Desulfobacterota	c__Desulfobulbia	o__Desulfobulbales	f__Desulfocapsaceae	g__Desulfofustis	s__uncultured_bacterium_g__Desulfofustis	ASV32977	0	0	0	0	0	0	0	0	0	0	0	0	0	0	0	0	0	0	0	0	0	0	0	0	0	0	0	0	0	0	0	0	0	0	0	0	0	0	0	0	0
d__Bacteria	k__norank_d__Bacteria	p__Gemmatimonadota	c__BD2-11_terrestrial_group	o__norank_c__BD2-11_terrestrial_group	f__norank_c__BD2-11_terrestrial_group	g__norank_c__BD2-11_terrestrial_group	s__uncultured_bacterium_c__BD2-11_terrestrial_group	ASV80179	0	0	0	0	0	0	0	0	0	0	0	0	0	0	0	0	0	0	0	0	0	0	0	0	0	0	0	0	0	3	0	0	0	0	0	0	0	0	0	0	0
d__Bacteria	k__norank_d__Bacteria	p__Actinobacteriota	c__unclassified_p__Actinobacteriota	o__unclassified_p__Actinobacteriota	f__unclassified_p__Actinobacteriota	g__unclassified_p__Actinobacteriota	s__unclassified_p__Actinobacteriota	ASV55357	0	0	0	0	0	0	0	0	0	0	0	0	0	0	0	0	0	0	0	0	0	0	0	0	0	0	0	0	0	0	0	0	0	0	0	0	0	0	0	0	0
d__Bacteria	k__norank_d__Bacteria	p__Bacteroidota	c__Bacteroidia	o__Flavobacteriales	f__Flavobacteriaceae	g__Lutibacter	s__unclassified_g__Lutibacter	ASV41090	0	0	0	0	0	0	0	0	0	0	0	0	0	0	0	0	0	0	0	35	0	0	0	0	0	0	0	0	0	0	0	0	0	0	0	0	0	0	0	0	0
d__Bacteria	k__norank_d__Bacteria	p__Acidobacteriota	c__Subgroup_21	o__norank_c__Subgroup_21	f__norank_c__Subgroup_21	g__norank_c__Subgroup_21	s__uncultured_bacterium_c__Subgroup_21	ASV69572	0	0	0	0	0	0	0	0	0	0	0	0	0	0	0	1	0	0	0	0	0	0	0	0	0	0	0	0	0	0	0	0	0	0	0	0	0	0	0	0	0
d__Bacteria	k__norank_d__Bacteria	p__Sva0485	c__norank_p__Sva0485	o__norank_p__Sva0485	f__norank_p__Sva0485	g__norank_p__Sva0485	s__unclassified_g__norank_p__Sva0485	ASV78839	0	0	0	0	0	0	0	0	0	0	0	0	0	0	0	0	0	0	0	0	0	0	0	0	0	0	0	0	0	0	0	2	0	0	0	0	0	0	0	0	0
d__Bacteria	k__norank_d__Bacteria	p__Chloroflexi	c__Chloroflexia	o__Chloroflexales	f__Roseiflexaceae	g__norank_f__Roseiflexaceae	s__uncultured_bacterium_f__Roseiflexaceae	ASV96048	0	0	0	0	0	0	0	0	0	0	0	0	0	0	0	0	0	0	0	0	0	0	0	0	0	0	0	0	0	0	0	0	0	0	0	0	0	0	0	0	3
d__Bacteria	k__norank_d__Bacteria	p__unclassified_k__norank_d__Bacteria	c__unclassified_k__norank_d__Bacteria	o__unclassified_k__norank_d__Bacteria	f__unclassified_k__norank_d__Bacteria	g__unclassified_k__norank_d__Bacteria	s__unclassified_k__norank_d__Bacteria	ASV30497	0	0	0	0	0	0	0	0	0	0	0	0	0	0	0	0	0	0	0	0	0	0	2	0	0	0	0	0	0	0	0	0	0	0	0	0	0	0	0	0	0
d__Bacteria	k__norank_d__Bacteria	p__Acidobacteriota	c__Blastocatellia	o__Blastocatellales	f__Blastocatellaceae	g__Blastocatella	s__unclassified_g__Blastocatella	ASV8226	0	0	0	0	0	0	0	0	0	0	0	0	0	0	0	0	0	0	0	0	0	0	0	0	0	0	0	0	8	0	0	0	0	0	0	0	0	0	0	0	0
d__Bacteria	k__norank_d__Bacteria	p__Proteobacteria	c__Gammaproteobacteria	o__Nitrosococcales	f__Methylophagaceae	g__Methylophaga	s__unclassified_g__Methylophaga	ASV17887	0	0	0	0	0	0	0	0	0	0	0	0	0	0	0	0	0	0	0	0	0	0	0	0	0	0	1	0	0	0	0	0	0	0	0	0	0	0	0	0	0
d__Bacteria	k__norank_d__Bacteria	p__SAR324_cladeMarine_group_B	c__norank_p__SAR324_cladeMarine_group_B	o__norank_p__SAR324_cladeMarine_group_B	f__norank_p__SAR324_cladeMarine_group_B	g__norank_p__SAR324_cladeMarine_group_B	s__unclassified_g__norank_p__SAR324_cladeMarine_group_B	ASV49222	0	0	0	0	0	0	0	0	0	5	0	0	0	0	0	0	0	0	0	0	0	0	0	0	0	0	0	0	0	0	0	0	0	0	0	0	0	0	0	0	0
d__Bacteria	k__norank_d__Bacteria	p__Verrucomicrobiota	c__Verrucomicrobiae	o__Opitutales	f__Puniceicoccaceae	g__Lentimonas	s__uncultured_bacterium_g__Lentimonas	ASV39186	0	0	0	0	0	0	0	0	0	0	0	0	0	0	0	0	0	0	2	0	0	0	0	0	0	0	0	0	0	0	0	0	0	0	0	0	0	0	0	0	0
d__Bacteria	k__norank_d__Bacteria	p__Chloroflexi	c__Anaerolineae	o__norank_c__Anaerolineae	f__norank_c__Anaerolineae	g__norank_c__Anaerolineae	s__uncultured_bacterium_c__Anaerolineae	ASV31191	0	0	0	0	0	0	0	0	0	0	0	0	0	0	0	0	0	0	0	0	0	0	0	14	0	0	0	0	0	0	0	0	0	0	0	0	10	17	0	0	0
d__Bacteria	k__norank_d__Bacteria	p__Actinobacteriota	c__Actinobacteria	o__Corynebacteriales	f__Nocardiaceae	g__Rhodococcus	s__unclassified_g__Rhodococcus	ASV63514	0	0	0	0	0	0	0	0	0	0	0	0	0	0	0	0	0	0	0	0	0	0	0	0	0	0	0	0	0	0	0	0	0	0	0	2	0	0	0	0	0
d__Bacteria	k__norank_d__Bacteria	p__Proteobacteria	c__Alphaproteobacteria	o__Rhodobacterales	f__Rhodobacteraceae	g__Limibaculum	s__unclassified_g__Limibaculum	ASV18546	0	0	0	0	0	0	0	0	0	0	0	0	0	0	0	0	0	0	0	0	0	0	0	0	0	0	3	0	0	0	0	0	0	0	0	0	0	0	0	0	0
d__Bacteria	k__norank_d__Bacteria	p__Chloroflexi	c__Anaerolineae	o__SBR1031	f__norank_o__SBR1031	g__norank_o__SBR1031	s__unclassified_g__norank_o__SBR1031	ASV60370	0	0	0	0	0	0	0	0	0	0	0	0	0	0	0	0	0	0	0	0	0	0	0	0	0	0	0	0	0	0	0	0	0	0	0	0	0	0	0	0	0
d__Bacteria	k__norank_d__Bacteria	p__unclassified_k__norank_d__Bacteria	c__unclassified_k__norank_d__Bacteria	o__unclassified_k__norank_d__Bacteria	f__unclassified_k__norank_d__Bacteria	g__unclassified_k__norank_d__Bacteria	s__unclassified_k__norank_d__Bacteria	ASV23946	0	0	0	0	0	0	0	0	0	0	0	0	0	0	0	0	0	1	0	0	0	0	0	0	0	0	0	0	0	0	0	0	0	0	0	0	0	0	0	0	0
d__Bacteria	k__norank_d__Bacteria	p__Armatimonadota	c__Armatimonadia	o__Armatimonadales	f__Armatimonadaceae	g__Armatimonas	s__uncultured_beta_proteobacterium_g__Armatimonas	ASV23906	0	0	0	0	0	0	0	0	0	0	0	0	0	0	0	0	3	2	0	0	0	0	0	0	0	0	0	0	0	0	0	0	0	0	0	0	0	0	0	0	0
d__Bacteria	k__norank_d__Bacteria	p__Proteobacteria	c__Gammaproteobacteria	o__unclassified_c__Gammaproteobacteria	f__unclassified_c__Gammaproteobacteria	g__unclassified_c__Gammaproteobacteria	s__unclassified_c__Gammaproteobacteria	ASV23754	0	0	0	0	0	0	0	0	0	0	0	0	0	0	0	0	0	2	0	0	0	0	0	0	0	0	0	0	0	0	0	0	0	0	0	0	0	0	0	0	0
d__Bacteria	k__norank_d__Bacteria	p__Proteobacteria	c__Gammaproteobacteria	o__unclassified_c__Gammaproteobacteria	f__unclassified_c__Gammaproteobacteria	g__unclassified_c__Gammaproteobacteria	s__unclassified_c__Gammaproteobacteria	ASV84467	0	0	0	0	0	0	0	0	0	0	0	0	0	0	0	0	0	0	0	0	0	0	0	0	0	0	0	0	0	0	2	0	0	0	0	0	0	0	0	0	0
d__Bacteria	k__norank_d__Bacteria	p__Chloroflexi	c__Anaerolineae	o__unclassified_c__Anaerolineae	f__unclassified_c__Anaerolineae	g__unclassified_c__Anaerolineae	s__unclassified_c__Anaerolineae	ASV52925	1	0	0	0	0	0	0	0	0	0	0	0	0	0	0	0	0	0	0	0	0	0	0	0	0	0	0	0	0	0	0	0	0	0	0	0	0	0	0	0	0
d__Bacteria	k__norank_d__Bacteria	p__unclassified_k__norank_d__Bacteria	c__unclassified_k__norank_d__Bacteria	o__unclassified_k__norank_d__Bacteria	f__unclassified_k__norank_d__Bacteria	g__unclassified_k__norank_d__Bacteria	s__unclassified_k__norank_d__Bacteria	ASV44690	0	0	0	0	0	0	2	0	0	0	0	0	0	0	0	0	0	0	0	0	0	0	0	0	0	0	0	0	0	0	0	0	0	0	0	0	0	0	0	0	0
d__Bacteria	k__norank_d__Bacteria	p__unclassified_k__norank_d__Bacteria	c__unclassified_k__norank_d__Bacteria	o__unclassified_k__norank_d__Bacteria	f__unclassified_k__norank_d__Bacteria	g__unclassified_k__norank_d__Bacteria	s__unclassified_k__norank_d__Bacteria	ASV6168	0	0	0	0	0	0	0	0	0	0	0	0	0	0	1	0	0	0	0	0	0	0	0	0	0	0	0	0	0	0	0	0	0	0	0	0	0	0	0	0	0
d__Bacteria	k__norank_d__Bacteria	p__Bacteroidota	c__Bacteroidia	o__Bacteroidales	f__Bacteroidetes_BD2-2	g__norank_f__Bacteroidetes_BD2-2	s__uncultured_Bacteroidetes_bacterium_f__Bacteroidetes_BD2-2	ASV74892	0	0	0	0	0	2	0	0	0	0	0	0	0	0	0	0	0	0	0	0	0	0	0	0	0	0	0	0	0	0	0	0	0	0	0	0	0	0	0	0	0
d__Bacteria	k__norank_d__Bacteria	p__Proteobacteria	c__Alphaproteobacteria	o__Rhodobacterales	f__Rhodobacteraceae	g__Roseivivax	s__Roseivivax_lentus	ASV16071	0	0	0	0	0	0	0	0	0	0	0	0	0	0	0	0	0	0	0	0	0	18	25	0	27	14	29	0	0	0	0	0	0	0	0	0	0	0	0	0	0
d__Bacteria	k__norank_d__Bacteria	p__Planctomycetota	c__OM190	o__norank_c__OM190	f__norank_c__OM190	g__norank_c__OM190	s__unidentified_marine_eubacterium_c__OM190	ASV55116	0	0	0	0	0	0	0	0	0	0	0	0	0	0	0	0	0	0	0	0	0	0	0	0	0	0	0	0	0	0	0	0	0	0	0	0	0	0	0	0	0
d__Bacteria	k__norank_d__Bacteria	p__unclassified_k__norank_d__Bacteria	c__unclassified_k__norank_d__Bacteria	o__unclassified_k__norank_d__Bacteria	f__unclassified_k__norank_d__Bacteria	g__unclassified_k__norank_d__Bacteria	s__unclassified_k__norank_d__Bacteria	ASV28516	0	0	0	0	0	0	0	0	0	0	0	0	0	0	0	0	0	0	0	0	0	0	0	0	0	0	0	0	0	0	0	0	0	1	0	0	0	0	0	0	0
d__Bacteria	k__norank_d__Bacteria	p__Acidobacteriota	c__Aminicenantia	o__Aminicenantales	f__norank_o__Aminicenantales	g__norank_o__Aminicenantales	s__uncultured_bacterium_o__Aminicenantales	ASV13791	0	0	0	0	0	0	0	0	0	0	0	0	2	0	0	0	0	0	0	0	0	0	0	0	0	0	0	0	0	0	0	0	0	0	0	0	0	0	0	0	0
d__Bacteria	k__norank_d__Bacteria	p__Firmicutes	c__Bacilli	o__Acholeplasmatales	f__Acholeplasmataceae	g__Acholeplasma	s__unclassified_g__Acholeplasma	ASV100348	0	0	0	0	0	0	0	0	0	0	0	0	0	0	0	0	1	0	0	0	0	0	0	0	0	0	0	0	0	0	0	0	0	0	0	0	0	0	0	0	0
d__Bacteria	k__norank_d__Bacteria	p__Spirochaetota	c__Spirochaetia	o__Spirochaetales	f__Spirochaetaceae	g__unclassified_f__Spirochaetaceae	s__unclassified_f__Spirochaetaceae	ASV56126	0	3	0	0	0	0	0	0	0	0	0	0	0	0	0	0	0	0	0	0	0	0	0	0	0	0	0	0	0	0	0	0	0	0	0	0	0	0	0	0	0
d__Bacteria	k__norank_d__Bacteria	p__Proteobacteria	c__Alphaproteobacteria	o__unclassified_c__Alphaproteobacteria	f__unclassified_c__Alphaproteobacteria	g__unclassified_c__Alphaproteobacteria	s__unclassified_c__Alphaproteobacteria	ASV56755	0	1	0	0	0	0	0	0	0	0	0	0	0	0	0	0	0	0	0	0	0	0	0	0	0	0	0	0	0	0	0	0	0	0	0	0	0	0	0	0	0
d__Bacteria	k__norank_d__Bacteria	p__Proteobacteria	c__Alphaproteobacteria	o__Rhodobacterales	f__Rhodobacteraceae	g__unclassified_f__Rhodobacteraceae	s__unclassified_f__Rhodobacteraceae	ASV36181	0	0	0	0	0	0	0	0	0	0	0	0	0	0	0	0	0	0	0	0	0	0	0	0	0	0	0	4	0	0	0	0	0	0	0	0	0	0	0	0	0
d__Bacteria	k__norank_d__Bacteria	p__Verrucomicrobiota	c__Kiritimatiellae	o__WCHB1-41	f__norank_o__WCHB1-41	g__norank_o__WCHB1-41	s__uncultured_organism_o__WCHB1-41	ASV12840	0	0	0	0	0	0	0	0	0	0	0	0	2	0	0	0	0	0	0	0	0	0	0	0	0	0	0	0	0	0	0	0	0	0	0	0	0	0	0	0	0
d__Bacteria	k__norank_d__Bacteria	p__Firmicutes	c__Bacilli	o__Alicyclobacillales	f__Alicyclobacillaceae	g__Tumebacillus	s__unclassified_g__Tumebacillus	ASV30009	0	0	0	0	0	0	0	0	0	0	0	0	0	0	0	0	0	0	0	0	0	0	3	0	0	0	0	0	0	0	0	0	0	0	0	0	0	0	0	0	0
d__Bacteria	k__norank_d__Bacteria	p__Acidobacteriota	c__Thermoanaerobaculia	o__Thermoanaerobaculales	f__Thermoanaerobaculaceae	g__Subgroup_23	s__uncultured_bacterium_g__Subgroup_23	ASV72941	0	0	0	0	0	0	0	0	0	0	0	0	0	0	0	0	0	0	0	0	0	0	0	0	0	5	0	0	0	0	0	0	0	0	0	0	0	0	0	0	0
d__Bacteria	k__norank_d__Bacteria	p__Bacteroidota	c__Bacteroidia	o__Bacteroidales	f__Bacteroidetes_BD2-2	g__norank_f__Bacteroidetes_BD2-2	s__unclassified_g__norank_f__Bacteroidetes_BD2-2	ASV86680	0	0	0	0	0	0	0	0	0	0	0	0	0	0	0	0	0	0	0	0	0	0	0	6	0	0	0	0	0	0	0	0	0	0	0	0	0	0	0	0	0
d__Bacteria	k__norank_d__Bacteria	p__Desulfobacterota	c__Desulfobacteria	o__Desulfobacterales	f__Desulfosarcinaceae	g__norank_f__Desulfosarcinaceae	s__unclassified_g__norank_f__Desulfosarcinaceae	ASV30100	0	0	0	0	0	0	0	0	0	0	0	0	0	0	0	0	0	0	0	0	0	0	2	0	0	0	0	0	0	0	0	0	0	0	0	0	0	0	0	0	0
d__Bacteria	k__norank_d__Bacteria	p__Proteobacteria	c__Gammaproteobacteria	o__Burkholderiales	f__Nitrosomonadaceae	g__MND1	s__unclassified_g__MND1	ASV92506	0	0	0	0	0	0	0	0	0	0	0	8	0	0	0	0	0	0	0	0	0	0	0	0	0	0	0	0	0	0	0	0	0	0	0	0	0	0	0	0	0
d__Bacteria	k__norank_d__Bacteria	p__Actinobacteriota	c__unclassified_p__Actinobacteriota	o__unclassified_p__Actinobacteriota	f__unclassified_p__Actinobacteriota	g__unclassified_p__Actinobacteriota	s__unclassified_p__Actinobacteriota	ASV81099	0	0	0	0	0	0	0	0	0	0	0	0	0	0	0	0	0	0	0	0	0	0	0	0	0	0	0	0	0	2	0	0	0	0	0	0	0	0	0	0	0
d__Bacteria	k__norank_d__Bacteria	p__unclassified_k__norank_d__Bacteria	c__unclassified_k__norank_d__Bacteria	o__unclassified_k__norank_d__Bacteria	f__unclassified_k__norank_d__Bacteria	g__unclassified_k__norank_d__Bacteria	s__unclassified_k__norank_d__Bacteria	ASV66404	0	0	2	0	0	0	0	0	0	0	0	0	0	0	0	0	0	0	0	0	0	0	0	0	0	0	0	0	0	0	0	0	0	0	0	0	0	0	0	0	0
d__Bacteria	k__norank_d__Bacteria	p__Nitrospirota	c__Thermodesulfovibrionia	o__norank_c__Thermodesulfovibrionia	f__norank_c__Thermodesulfovibrionia	g__norank_c__Thermodesulfovibrionia	s__unclassified_g__norank_c__Thermodesulfovibrionia	ASV62513	0	0	0	0	0	0	0	0	0	0	0	0	0	2	0	0	0	0	0	0	0	0	0	0	0	0	0	0	0	0	0	0	0	0	0	0	0	0	0	0	0
d__Bacteria	k__norank_d__Bacteria	p__Desulfobacterota	c__unclassified_p__Desulfobacterota	o__unclassified_p__Desulfobacterota	f__unclassified_p__Desulfobacterota	g__unclassified_p__Desulfobacterota	s__unclassified_p__Desulfobacterota	ASV24561	0	0	0	0	0	0	0	0	0	0	0	0	0	0	0	0	0	1	0	0	0	0	0	0	0	0	0	0	0	0	0	0	0	0	0	0	0	0	0	0	0
d__Bacteria	k__norank_d__Bacteria	p__Chloroflexi	c__Anaerolineae	o__SBR1031	f__norank_o__SBR1031	g__norank_o__SBR1031	s__unclassified_g__norank_o__SBR1031	ASV13864	35	27	38	76	213	35	110	91	78	0	0	13	0	0	0	17	0	6	0	0	0	0	0	12	0	0	0	0	0	0	0	0	0	0	0	0	0	0	0	0	0
d__Bacteria	k__norank_d__Bacteria	p__Modulibacteria	c__Moduliflexia	o__Moduliflexales	f__Moduliflexaceae	g__norank_f__Moduliflexaceae	s__uncultured_bacterium_f__Moduliflexaceae	ASV87568	0	0	0	0	0	0	0	0	0	0	0	0	0	0	0	0	0	0	0	0	0	0	0	2	0	0	0	0	0	0	0	0	0	0	0	0	0	0	0	0	0
d__Bacteria	k__norank_d__Bacteria	p__Acidobacteriota	c__Vicinamibacteria	o__Subgroup_17	f__norank_o__Subgroup_17	g__norank_o__Subgroup_17	s__uncultured_bacterium_o__Subgroup_17	ASV32443	0	0	0	0	0	0	0	0	0	0	0	0	0	0	0	0	0	0	0	0	0	0	0	0	0	0	0	0	0	0	0	0	0	0	0	0	0	0	0	0	0
d__Bacteria	k__norank_d__Bacteria	p__Firmicutes	c__Bacilli	o__Exiguobacterales	f__Exiguobacteraceae	g__Exiguobacterium	s__unclassified_g__Exiguobacterium	ASV13209	0	0	0	0	0	0	0	0	0	0	0	0	2	0	0	0	0	0	0	0	0	0	0	0	0	0	0	0	0	0	0	0	0	0	0	0	0	0	0	0	0
d__Bacteria	k__norank_d__Bacteria	p__Myxococcota	c__Polyangia	o__Polyangiales	f__Sandaracinaceae	g__norank_f__Sandaracinaceae	s__unclassified_g__norank_f__Sandaracinaceae	ASV83494	0	0	0	0	0	0	0	0	0	0	0	0	0	0	0	0	0	0	0	0	0	0	0	0	0	0	0	0	0	0	3	0	0	0	0	0	0	0	0	0	0
d__Bacteria	k__norank_d__Bacteria	p__unclassified_k__norank_d__Bacteria	c__unclassified_k__norank_d__Bacteria	o__unclassified_k__norank_d__Bacteria	f__unclassified_k__norank_d__Bacteria	g__unclassified_k__norank_d__Bacteria	s__unclassified_k__norank_d__Bacteria	ASV47945	0	0	0	0	0	0	0	0	2	0	0	0	0	0	0	0	0	0	0	0	0	0	0	0	0	0	0	0	0	0	0	0	0	0	0	0	0	0	0	0	0
d__Bacteria	k__norank_d__Bacteria	p__Proteobacteria	c__Alphaproteobacteria	o__unclassified_c__Alphaproteobacteria	f__unclassified_c__Alphaproteobacteria	g__unclassified_c__Alphaproteobacteria	s__unclassified_c__Alphaproteobacteria	ASV6700	0	0	0	0	0	0	0	0	0	0	0	0	0	0	2	0	0	0	0	0	0	0	0	0	0	0	0	0	0	0	0	0	0	0	0	0	0	0	0	0	0
d__Bacteria	k__norank_d__Bacteria	p__Cyanobacteria	c__Cyanobacteriia	o__Synechococcales	f__Cyanobiaceae	g__Synechococcus_CC9902	s__unclassified_g__Synechococcus_CC9902	ASV8064	0	0	0	0	0	0	0	0	0	0	0	0	0	0	0	0	0	0	0	0	0	0	0	0	0	7	0	8	9	18	0	0	0	0	0	0	21	8	21	0	0
d__Bacteria	k__norank_d__Bacteria	p__unclassified_k__norank_d__Bacteria	c__unclassified_k__norank_d__Bacteria	o__unclassified_k__norank_d__Bacteria	f__unclassified_k__norank_d__Bacteria	g__unclassified_k__norank_d__Bacteria	s__unclassified_k__norank_d__Bacteria	ASV9508	0	0	0	0	0	0	0	0	0	0	0	0	0	0	0	0	0	0	0	0	0	0	0	0	0	0	0	0	3	11	0	0	0	0	0	0	0	0	0	0	0
d__Bacteria	k__norank_d__Bacteria	p__unclassified_k__norank_d__Bacteria	c__unclassified_k__norank_d__Bacteria	o__unclassified_k__norank_d__Bacteria	f__unclassified_k__norank_d__Bacteria	g__unclassified_k__norank_d__Bacteria	s__unclassified_k__norank_d__Bacteria	ASV87888	0	0	0	0	0	0	0	0	0	0	0	0	0	0	0	0	0	0	0	0	0	0	0	2	0	0	0	0	0	0	0	0	0	0	0	0	0	0	0	0	0
d__Bacteria	k__norank_d__Bacteria	p__Firmicutes	c__Clostridia	o__Peptostreptococcales-Tissierellales	f__Thermotaleaceae	g__unclassified_f__Thermotaleaceae	s__unclassified_f__Thermotaleaceae	ASV86601	0	0	0	0	0	0	0	0	0	0	0	0	0	0	0	0	0	0	0	0	0	0	0	5	0	0	0	0	0	0	0	0	0	0	0	0	0	0	0	0	0
d__Bacteria	k__norank_d__Bacteria	p__Proteobacteria	c__unclassified_p__Proteobacteria	o__unclassified_p__Proteobacteria	f__unclassified_p__Proteobacteria	g__unclassified_p__Proteobacteria	s__unclassified_p__Proteobacteria	ASV67703	0	0	0	0	0	0	0	0	0	0	0	0	0	0	0	3	0	0	0	0	0	0	0	0	0	0	0	0	0	0	0	0	0	0	0	0	0	0	0	0	0
d__Bacteria	k__norank_d__Bacteria	p__Proteobacteria	c__Gammaproteobacteria	o__Burkholderiales	f__Comamonadaceae	g__unclassified_f__Comamonadaceae	s__unclassified_f__Comamonadaceae	ASV51400	0	0	0	0	1	0	0	0	0	0	0	0	0	0	0	0	0	0	0	0	0	0	0	0	0	0	0	0	0	0	0	0	0	0	0	0	0	0	0	0	0
d__Bacteria	k__norank_d__Bacteria	p__Actinobacteriota	c__Acidimicrobiia	o__Microtrichales	f__unclassified_o__Microtrichales	g__unclassified_o__Microtrichales	s__unclassified_o__Microtrichales	ASV83225	0	0	0	0	0	0	0	0	0	0	0	0	0	0	0	0	0	0	0	0	0	0	0	0	0	0	0	0	0	0	4	0	0	0	0	0	0	0	0	0	0
d__Bacteria	k__norank_d__Bacteria	p__unclassified_k__norank_d__Bacteria	c__unclassified_k__norank_d__Bacteria	o__unclassified_k__norank_d__Bacteria	f__unclassified_k__norank_d__Bacteria	g__unclassified_k__norank_d__Bacteria	s__unclassified_k__norank_d__Bacteria	ASV5030	0	0	0	0	0	0	0	0	0	0	0	0	0	0	3	0	0	0	0	0	0	0	0	0	0	0	0	0	0	0	0	0	0	0	0	0	0	0	0	0	0
d__Bacteria	k__norank_d__Bacteria	p__Acidobacteriota	c__Subgroup_21	o__norank_c__Subgroup_21	f__norank_c__Subgroup_21	g__norank_c__Subgroup_21	s__uncultured_bacterium_c__Subgroup_21	ASV101182	0	0	0	0	0	0	0	0	0	0	0	0	0	0	0	0	1	0	0	0	0	0	0	0	0	0	0	0	0	0	0	0	0	0	0	0	0	0	0	0	0
d__Bacteria	k__norank_d__Bacteria	p__Proteobacteria	c__Gammaproteobacteria	o__Gammaproteobacteria_Incertae_Sedis	f__unclassified_o__Gammaproteobacteria_Incertae_Sedis	g__Candidatus_Berkiella	s__uncultured_bacterium_g__Candidatus_Berkiella	ASV48654	0	0	0	0	0	0	0	0	2	2	2	0	0	0	0	0	0	0	0	0	0	0	0	0	0	0	0	0	0	0	0	0	0	0	0	0	0	0	0	0	0
d__Bacteria	k__norank_d__Bacteria	p__Chloroflexi	c__KD4-96	o__norank_c__KD4-96	f__norank_c__KD4-96	g__norank_c__KD4-96	s__unclassified_g__norank_c__KD4-96	ASV98907	0	0	0	0	0	0	0	0	0	0	0	0	0	0	0	0	4	0	0	0	0	0	0	0	0	0	0	0	0	0	0	0	0	0	0	0	0	0	0	0	0
d__Bacteria	k__norank_d__Bacteria	p__Proteobacteria	c__Gammaproteobacteria	o__Coxiellales	f__Coxiellaceae	g__Coxiella	s__unclassified_g__Coxiella	ASV15606	0	0	0	0	0	0	0	3	0	0	0	0	0	0	0	0	0	0	0	0	0	0	0	0	0	0	0	0	0	0	0	0	0	0	0	0	0	0	0	0	0
d__Bacteria	k__norank_d__Bacteria	p__Gemmatimonadota	c__Gemmatimonadetes	o__Gemmatimonadales	f__Gemmatimonadaceae	g__norank_f__Gemmatimonadaceae	s__unclassified_g__norank_f__Gemmatimonadaceae	ASV67587	0	0	0	0	0	0	0	0	0	0	0	0	0	0	0	4	3	0	0	0	0	0	0	0	0	0	0	0	0	0	0	0	0	0	0	0	0	0	0	0	0
d__Bacteria	k__norank_d__Bacteria	p__Chloroflexi	c__Anaerolineae	o__SBR1031	f__norank_o__SBR1031	g__norank_o__SBR1031	s__unclassified_g__norank_o__SBR1031	ASV61189	0	0	0	0	0	0	0	0	0	0	0	0	0	5	0	0	0	0	0	0	0	0	0	0	0	0	0	0	0	0	0	0	0	0	0	0	0	0	0	0	0
d__Bacteria	k__norank_d__Bacteria	p__Firmicutes	c__Clostridia	o__Peptostreptococcales-Tissierellales	f__norank_o__Peptostreptococcales-Tissierellales	g__Brassicibacter	s__uncultured_bacterium_g__Brassicibacter	ASV22767	0	0	0	0	0	0	0	0	0	0	0	0	0	0	0	0	0	4	0	0	0	0	0	0	0	0	0	0	0	0	0	0	0	0	0	0	0	0	0	0	0
d__Bacteria	k__norank_d__Bacteria	p__Firmicutes	c__Clostridia	o__Lachnospirales	f__Lachnospiraceae	g__norank_f__Lachnospiraceae	s__unclassified_g__norank_f__Lachnospiraceae	ASV45243	0	0	0	5	0	0	0	0	0	0	0	0	0	0	0	0	0	0	0	0	0	0	0	0	0	0	0	0	0	0	0	0	0	0	0	0	0	0	0	0	0
d__Bacteria	k__norank_d__Bacteria	p__Latescibacterota	c__norank_p__Latescibacterota	o__norank_p__Latescibacterota	f__norank_p__Latescibacterota	g__norank_p__Latescibacterota	s__uncultured_organism_p__Latescibacterota	ASV48943	0	0	0	0	0	0	0	0	0	8	0	12	0	0	0	0	0	0	0	0	0	0	0	0	0	0	0	0	0	0	0	0	0	0	0	0	0	0	0	0	0
d__Bacteria	k__norank_d__Bacteria	p__Proteobacteria	c__Gammaproteobacteria	o__EV818SWSAP88	f__norank_o__EV818SWSAP88	g__norank_o__EV818SWSAP88	s__uncultured_bacterium_o__EV818SWSAP88	ASV33720	0	0	0	0	0	0	0	0	0	0	0	0	0	0	0	0	0	0	0	0	0	0	0	0	0	0	0	0	0	0	0	0	0	0	0	0	0	0	0	0	0
d__Bacteria	k__norank_d__Bacteria	p__unclassified_k__norank_d__Bacteria	c__unclassified_k__norank_d__Bacteria	o__unclassified_k__norank_d__Bacteria	f__unclassified_k__norank_d__Bacteria	g__unclassified_k__norank_d__Bacteria	s__unclassified_k__norank_d__Bacteria	ASV68169	0	0	0	0	0	0	0	0	0	0	0	0	0	0	0	2	0	0	0	0	0	0	0	0	0	0	0	0	0	0	0	0	0	0	0	0	0	0	0	0	0
d__Bacteria	k__norank_d__Bacteria	p__Acidobacteriota	c__Thermoanaerobaculia	o__Thermoanaerobaculales	f__Thermoanaerobaculaceae	g__Subgroup_23	s__unclassified_g__Subgroup_23	ASV2709	0	0	0	0	0	0	0	0	0	0	0	0	0	0	0	0	0	0	0	0	0	0	0	0	0	0	0	0	0	0	0	0	0	0	0	0	0	0	0	0	0
d__Bacteria	k__norank_d__Bacteria	p__Myxococcota	c__Polyangia	o__Polyangiales	f__Eel-36e1D6	g__norank_f__Eel-36e1D6	s__unclassified_g__norank_f__Eel-36e1D6	ASV47518	0	0	0	0	0	0	0	0	9	0	0	0	0	0	0	0	0	0	0	0	0	0	0	0	0	0	0	0	0	0	0	0	0	0	0	0	0	0	0	0	0
d__Bacteria	k__norank_d__Bacteria	p__MBNT15	c__norank_p__MBNT15	o__norank_p__MBNT15	f__norank_p__MBNT15	g__norank_p__MBNT15	s__unclassified_g__norank_p__MBNT15	ASV40081	0	0	0	0	0	0	0	0	0	0	0	0	0	0	0	0	0	0	0	0	0	0	0	0	0	0	0	0	0	0	0	0	0	0	0	0	0	4	0	0	0
d__Bacteria	k__norank_d__Bacteria	p__Acidobacteriota	c__Vicinamibacteria	o__Vicinamibacterales	f__norank_o__Vicinamibacterales	g__norank_o__Vicinamibacterales	s__unclassified_g__norank_o__Vicinamibacterales	ASV48767	0	0	0	0	0	0	0	0	0	18	0	0	0	0	0	0	0	0	0	0	0	0	0	0	0	0	0	0	0	0	0	0	0	0	0	0	0	0	0	0	0
d__Bacteria	k__norank_d__Bacteria	p__Proteobacteria	c__Gammaproteobacteria	o__KI89A_clade	f__norank_o__KI89A_clade	g__norank_o__KI89A_clade	s__unclassified_g__norank_o__KI89A_clade	ASV45740	0	0	0	3	0	0	0	0	0	0	0	0	0	0	0	0	0	0	0	0	0	0	0	0	0	0	0	0	0	0	0	0	0	0	0	0	0	0	0	0	0
d__Bacteria	k__norank_d__Bacteria	p__Desulfobacterota	c__Desulfobacteria	o__Desulfobacterales	f__Desulfosarcinaceae	g__Desulfatitalea	s__uncultured_delta_proteobacterium_g__Desulfatitalea	ASV57542	0	0	0	0	0	0	0	0	0	0	0	0	0	0	0	0	0	0	0	0	0	0	0	0	0	0	0	0	0	0	0	0	5	0	0	0	0	0	0	0	0
d__Bacteria	k__norank_d__Bacteria	p__Proteobacteria	c__Gammaproteobacteria	o__Gammaproteobacteria_Incertae_Sedis	f__unclassified_o__Gammaproteobacteria_Incertae_Sedis	g__norank_f__unclassified_o__Gammaproteobacteria_Incertae_Sedis	s__uncultured_bacterium_f__unclassified_o__Gammaproteobacteria_Incertae_Sedis	ASV40217	0	0	0	0	0	0	0	0	0	0	0	0	0	0	0	0	0	0	0	0	0	0	0	0	0	0	0	0	0	0	0	0	0	0	0	0	0	4	0	0	0
d__Bacteria	k__norank_d__Bacteria	p__Proteobacteria	c__Gammaproteobacteria	o__Burkholderiales	f__Comamonadaceae	g__Ottowia	s__uncultured_bacterium_g__Ottowia	ASV64149	0	0	0	0	0	0	0	0	0	0	0	0	0	0	0	0	0	0	0	0	0	0	0	0	0	0	0	0	0	0	0	0	0	0	0	0	0	0	0	0	0
d__Bacteria	k__norank_d__Bacteria	p__Firmicutes	c__Clostridia	o__Peptostreptococcales-Tissierellales	f__Peptostreptococcaceae	g__unclassified_f__Peptostreptococcaceae	s__unclassified_f__Peptostreptococcaceae	ASV61836	0	0	0	0	0	0	0	0	0	0	0	0	0	2	0	0	0	0	0	0	0	0	0	0	0	0	0	0	0	0	0	0	0	0	0	0	0	0	0	0	0
d__Bacteria	k__norank_d__Bacteria	p__Patescibacteria	c__Parcubacteria	o__Candidatus_Kaiserbacteria	f__norank_o__Candidatus_Kaiserbacteria	g__norank_o__Candidatus_Kaiserbacteria	s__uncultured_organism_o__Candidatus_Kaiserbacteria	ASV18486	0	0	0	0	0	0	0	0	0	0	0	0	0	0	0	0	0	0	0	0	0	0	0	0	0	0	2	0	0	0	0	0	0	0	0	0	0	0	0	0	0
d__Bacteria	k__norank_d__Bacteria	p__Spirochaetota	c__Leptospirae	o__Leptospirales	f__Leptospiraceae	g__RBG-16-49-21	s__unclassified_g__RBG-16-49-21	ASV87803	0	0	0	0	0	0	0	0	0	0	0	0	0	0	0	0	0	0	0	0	0	0	0	2	0	0	0	0	0	0	0	0	0	0	0	0	0	0	0	0	0
d__Bacteria	k__norank_d__Bacteria	p__Bacteroidota	c__Bacteroidia	o__Bacteroidales	f__Prolixibacteraceae	g__norank_f__Prolixibacteraceae	s__uncultured_bacterium_f__Prolixibacteraceae	ASV76546	0	0	0	0	0	0	0	0	0	0	0	0	0	0	0	0	0	0	0	0	0	0	0	0	0	0	0	0	0	0	0	0	0	0	0	0	0	0	0	2	0
d__Bacteria	k__norank_d__Bacteria	p__Acidobacteriota	c__Subgroup_18	o__norank_c__Subgroup_18	f__norank_c__Subgroup_18	g__norank_c__Subgroup_18	s__unclassified_g__norank_c__Subgroup_18	ASV24140	0	0	0	0	0	0	0	0	0	0	0	0	0	0	0	0	0	1	0	0	0	0	0	0	0	0	0	0	0	0	0	0	0	0	0	0	0	0	0	0	0
d__Bacteria	k__norank_d__Bacteria	p__Proteobacteria	c__Gammaproteobacteria	o__Gammaproteobacteria_Incertae_Sedis	f__unclassified_o__Gammaproteobacteria_Incertae_Sedis	g__norank_f__unclassified_o__Gammaproteobacteria_Incertae_Sedis	s__unclassified_g__norank_f__unclassified_o__Gammaproteobacteria_Incertae_Sedis	ASV9066	0	0	0	0	0	0	0	0	0	0	0	0	0	0	0	0	0	0	0	0	0	0	0	0	0	0	0	0	3	0	0	0	0	0	0	0	0	0	0	0	0
d__Bacteria	k__norank_d__Bacteria	p__Desulfobacterota	c__Desulfuromonadia	o__Sva1033	f__norank_o__Sva1033	g__norank_o__Sva1033	s__unclassified_g__norank_o__Sva1033	ASV51594	9	0	0	0	0	0	0	0	0	0	0	0	0	0	0	0	0	0	0	0	0	0	0	0	0	0	0	0	0	0	0	0	0	0	0	0	0	0	0	0	0
d__Bacteria	k__norank_d__Bacteria	p__Proteobacteria	c__Alphaproteobacteria	o__unclassified_c__Alphaproteobacteria	f__unclassified_c__Alphaproteobacteria	g__unclassified_c__Alphaproteobacteria	s__unclassified_c__Alphaproteobacteria	ASV17759	0	0	0	0	0	0	0	0	0	0	0	0	0	0	0	0	0	0	0	0	0	0	0	0	0	0	3	0	0	0	0	0	0	0	0	0	0	0	0	0	0
d__Bacteria	k__norank_d__Bacteria	p__Proteobacteria	c__Gammaproteobacteria	o__KI89A_clade	f__norank_o__KI89A_clade	g__norank_o__KI89A_clade	s__unclassified_g__norank_o__KI89A_clade	ASV59910	0	0	0	0	0	0	0	0	0	0	0	0	0	0	0	0	0	0	0	0	0	0	0	0	0	0	0	0	0	0	0	0	0	0	0	0	0	0	0	0	0
d__Bacteria	k__norank_d__Bacteria	p__unclassified_k__norank_d__Bacteria	c__unclassified_k__norank_d__Bacteria	o__unclassified_k__norank_d__Bacteria	f__unclassified_k__norank_d__Bacteria	g__unclassified_k__norank_d__Bacteria	s__unclassified_k__norank_d__Bacteria	ASV83367	0	0	0	0	0	0	0	0	0	0	0	0	0	0	0	0	0	0	0	0	0	0	0	0	0	0	0	0	0	0	3	0	0	0	0	0	0	0	0	0	0
d__Bacteria	k__norank_d__Bacteria	p__Proteobacteria	c__Alphaproteobacteria	o__Rhodobacterales	f__Rhodobacteraceae	g__unclassified_f__Rhodobacteraceae	s__unclassified_f__Rhodobacteraceae	ASV75752	0	0	0	0	0	0	0	0	0	0	0	0	0	0	0	0	0	0	0	0	0	0	0	0	0	0	0	0	0	0	0	0	0	0	0	0	0	0	0	3	0
d__Bacteria	k__norank_d__Bacteria	p__Actinobacteriota	c__Actinobacteria	o__Pseudonocardiales	f__Pseudonocardiaceae	g__Pseudonocardia	s__unclassified_g__Pseudonocardia	ASV53672	0	0	0	0	0	0	0	0	0	0	0	0	0	0	0	0	0	0	0	0	0	0	0	0	0	0	0	0	0	0	0	0	0	0	0	0	0	0	0	0	0
d__Bacteria	k__norank_d__Bacteria	p__Proteobacteria	c__Gammaproteobacteria	o__unclassified_c__Gammaproteobacteria	f__unclassified_c__Gammaproteobacteria	g__unclassified_c__Gammaproteobacteria	s__unclassified_c__Gammaproteobacteria	ASV57677	0	0	0	0	0	0	0	0	0	0	0	0	0	0	0	0	0	0	0	0	0	0	0	0	0	0	0	0	0	0	0	0	4	0	0	0	0	0	0	0	0
d__Bacteria	k__norank_d__Bacteria	p__unclassified_k__norank_d__Bacteria	c__unclassified_k__norank_d__Bacteria	o__unclassified_k__norank_d__Bacteria	f__unclassified_k__norank_d__Bacteria	g__unclassified_k__norank_d__Bacteria	s__unclassified_k__norank_d__Bacteria	ASV21277	0	0	0	0	0	0	0	0	0	0	0	0	0	0	0	0	0	0	0	0	0	0	0	0	0	0	0	0	0	0	0	0	0	0	2	0	0	0	0	0	0
d__Bacteria	k__norank_d__Bacteria	p__Chloroflexi	c__Anaerolineae	o__SBR1031	f__norank_o__SBR1031	g__norank_o__SBR1031	s__unclassified_g__norank_o__SBR1031	ASV82842	0	0	0	0	0	0	0	0	0	0	0	0	0	0	0	0	0	0	0	0	0	0	0	0	0	0	0	0	0	0	0	0	0	0	0	0	0	0	2	0	0
d__Bacteria	k__norank_d__Bacteria	p__Myxococcota	c__Myxococcia	o__Myxococcales	f__Myxococcaceae	g__P3OB-42	s__uncultured_bacterium_g__P3OB-42	ASV100829	0	0	0	0	0	0	0	0	0	0	0	0	0	0	0	0	1	0	0	0	0	0	0	0	0	0	0	0	0	0	0	0	0	0	0	0	0	0	0	0	0
d__Bacteria	k__norank_d__Bacteria	p__Desulfobacterota	c__Desulfobulbia	o__Desulfobulbales	f__Desulfocapsaceae	g__unclassified_f__Desulfocapsaceae	s__unclassified_f__Desulfocapsaceae	ASV39314	0	0	0	0	0	0	0	0	0	0	0	0	0	0	0	0	0	0	2	0	0	0	0	0	0	0	0	0	0	0	0	0	0	0	0	0	0	0	0	0	0
d__Bacteria	k__norank_d__Bacteria	p__unclassified_k__norank_d__Bacteria	c__unclassified_k__norank_d__Bacteria	o__unclassified_k__norank_d__Bacteria	f__unclassified_k__norank_d__Bacteria	g__unclassified_k__norank_d__Bacteria	s__unclassified_k__norank_d__Bacteria	ASV35043	0	0	0	0	0	0	0	0	0	0	0	0	0	0	0	0	0	0	0	0	0	0	0	0	0	0	0	0	0	0	0	0	0	0	0	0	0	0	0	0	0
d__Bacteria	k__norank_d__Bacteria	p__Proteobacteria	c__Gammaproteobacteria	o__unclassified_c__Gammaproteobacteria	f__unclassified_c__Gammaproteobacteria	g__unclassified_c__Gammaproteobacteria	s__unclassified_c__Gammaproteobacteria	ASV12564	0	0	0	0	0	0	0	0	0	0	0	0	3	0	0	0	0	0	0	0	0	0	0	0	0	0	0	0	0	0	0	0	0	0	0	0	0	0	0	0	0
d__Bacteria	k__norank_d__Bacteria	p__Chloroflexi	c__Chloroflexia	o__Thermomicrobiales	f__JG30-KF-CM45	g__norank_f__JG30-KF-CM45	s__uncultured_bacterium_f__JG30-KF-CM45	ASV95947	0	0	0	0	0	0	0	0	0	0	0	0	0	0	0	0	0	0	0	0	0	0	0	0	0	0	0	0	0	0	0	0	0	0	0	0	0	0	0	0	1
d__Bacteria	k__norank_d__Bacteria	p__unclassified_k__norank_d__Bacteria	c__unclassified_k__norank_d__Bacteria	o__unclassified_k__norank_d__Bacteria	f__unclassified_k__norank_d__Bacteria	g__unclassified_k__norank_d__Bacteria	s__unclassified_k__norank_d__Bacteria	ASV83507	0	0	0	0	0	0	0	0	0	0	0	0	0	0	0	0	0	0	0	0	0	0	0	0	0	0	0	0	0	0	2	0	0	0	0	0	0	0	0	0	0
d__Bacteria	k__norank_d__Bacteria	p__Chloroflexi	c__Anaerolineae	o__unclassified_c__Anaerolineae	f__unclassified_c__Anaerolineae	g__unclassified_c__Anaerolineae	s__unclassified_c__Anaerolineae	ASV71681	0	0	0	0	0	0	0	0	0	0	2	0	0	0	0	0	0	0	0	0	0	0	0	0	0	0	0	0	0	0	0	0	0	0	0	0	0	0	0	0	0
d__Bacteria	k__norank_d__Bacteria	p__Myxococcota	c__Polyangia	o__Polyangiales	f__Sandaracinaceae	g__norank_f__Sandaracinaceae	s__unclassified_g__norank_f__Sandaracinaceae	ASV14594	12	24	9	20	5	30	19	10	10	0	0	0	0	0	0	0	0	0	0	0	0	0	0	0	0	0	0	0	0	0	0	0	0	0	0	0	0	0	0	0	0
d__Bacteria	k__norank_d__Bacteria	p__Proteobacteria	c__Gammaproteobacteria	o__unclassified_c__Gammaproteobacteria	f__unclassified_c__Gammaproteobacteria	g__unclassified_c__Gammaproteobacteria	s__unclassified_c__Gammaproteobacteria	ASV98751	0	0	0	0	0	0	0	0	0	0	0	0	0	0	0	0	6	0	0	0	0	0	0	0	0	0	0	0	0	0	0	0	0	0	0	0	0	0	0	0	0
d__Bacteria	k__norank_d__Bacteria	p__Proteobacteria	c__Alphaproteobacteria	o__Rhizobiales	f__Methyloligellaceae	g__Methyloceanibacter	s__Methyloceanibacter_superfactus	ASV62045	0	0	0	0	0	0	0	0	0	0	0	0	0	2	0	0	0	0	0	0	0	0	0	0	0	0	0	0	0	0	0	0	0	0	0	0	0	0	0	0	0
d__Bacteria	k__norank_d__Bacteria	p__Chloroflexi	c__Anaerolineae	o__RBG-13-54-9	f__norank_o__RBG-13-54-9	g__norank_o__RBG-13-54-9	s__unclassified_g__norank_o__RBG-13-54-9	ASV41961	0	0	0	0	0	0	0	0	0	0	0	0	0	0	0	0	0	0	0	3	0	0	0	0	0	0	0	0	0	0	0	0	0	0	0	0	0	0	0	0	0
d__Bacteria	k__norank_d__Bacteria	p__Verrucomicrobiota	c__Verrucomicrobiae	o__Verrucomicrobiales	f__DEV007	g__norank_f__DEV007	s__unclassified_g__norank_f__DEV007	ASV36387	0	0	0	0	0	0	0	0	0	0	0	0	0	0	0	0	0	0	0	0	0	0	0	0	0	0	0	2	0	0	0	0	0	0	0	0	0	0	0	0	0
d__Bacteria	k__norank_d__Bacteria	p__Firmicutes	c__Clostridia	o__Peptostreptococcales-Tissierellales	f__Dethiosulfatibacteraceae	g__Dethiosulfatibacter	s__uncultured_bacterium_g__Dethiosulfatibacter	ASV1869	0	0	0	0	0	0	0	0	0	0	0	0	0	0	0	0	0	0	0	0	0	0	0	0	0	0	0	0	0	0	0	0	0	0	0	0	0	0	0	0	0
d__Bacteria	k__norank_d__Bacteria	p__Proteobacteria	c__Alphaproteobacteria	o__Kiloniellales	f__Kiloniellaceae	g__norank_f__Kiloniellaceae	s__unclassified_g__norank_f__Kiloniellaceae	ASV64737	0	0	0	0	0	0	0	0	0	0	0	0	0	0	0	0	0	0	0	0	0	0	0	0	0	0	0	0	0	0	0	0	0	0	0	0	0	0	0	0	0
d__Bacteria	k__norank_d__Bacteria	p__Spirochaetota	c__unclassified_p__Spirochaetota	o__unclassified_p__Spirochaetota	f__unclassified_p__Spirochaetota	g__unclassified_p__Spirochaetota	s__unclassified_p__Spirochaetota	ASV81080	0	0	0	0	0	0	0	0	0	0	0	0	0	0	0	0	0	0	0	0	0	0	0	0	0	0	0	0	0	1	0	0	0	0	0	0	0	0	0	0	0
d__Bacteria	k__norank_d__Bacteria	p__Desulfobacterota	c__Desulfuromonadia	o__Bradymonadales	f__norank_o__Bradymonadales	g__norank_o__Bradymonadales	s__uncultured_bacterium_o__Bradymonadales	ASV32756	0	0	0	0	0	0	0	0	0	0	0	0	0	0	0	0	0	0	0	0	0	0	0	0	0	0	0	0	0	0	0	0	0	0	0	0	0	0	0	5	4
d__Bacteria	k__norank_d__Bacteria	p__Desulfobacterota	c__Desulfobacteria	o__Desulfobacterales	f__Desulfococcaceae	g__norank_f__Desulfococcaceae	s__uncultured_Desulfatibacillum_sp.	ASV4831	1	0	2	0	0	0	2	0	0	0	3	0	0	6	3	18	35	28	41	0	14	0	0	0	0	0	0	0	0	0	0	0	0	0	0	0	0	0	0	0	0
d__Bacteria	k__norank_d__Bacteria	p__Spirochaetota	c__Spirochaetia	o__Spirochaetales	f__Spirochaetaceae	g__Spirochaeta_2	s__Spirochaeta_sp._LUC14_002_19_P3	ASV40613	0	0	0	0	0	0	0	0	0	0	0	0	0	0	0	0	0	0	0	0	0	0	0	0	0	0	0	0	0	0	0	0	0	0	0	0	0	2	0	0	0
d__Bacteria	k__norank_d__Bacteria	p__Proteobacteria	c__Gammaproteobacteria	o__unclassified_c__Gammaproteobacteria	f__unclassified_c__Gammaproteobacteria	g__unclassified_c__Gammaproteobacteria	s__unclassified_c__Gammaproteobacteria	ASV85030	0	0	0	0	0	0	0	0	0	0	0	0	0	0	0	0	0	0	0	0	0	0	0	0	0	0	0	0	0	0	0	0	0	0	0	0	0	0	0	0	0
d__Bacteria	k__norank_d__Bacteria	p__Planctomycetota	c__Planctomycetes	o__Gemmatales	f__Gemmataceae	g__norank_f__Gemmataceae	s__uncultured_bacterium_f__Gemmataceae	ASV80390	0	0	0	0	0	0	0	0	0	0	0	0	0	0	0	0	0	0	0	0	0	0	0	0	0	0	0	0	0	4	0	0	0	0	0	0	0	0	0	0	0
d__Bacteria	k__norank_d__Bacteria	p__Proteobacteria	c__Alphaproteobacteria	o__Rhizobiales	f__Hyphomicrobiaceae	g__Filomicrobium	s__unclassified_g__Filomicrobium	ASV31092	0	0	0	0	0	0	0	0	0	0	0	0	0	0	0	0	0	0	0	0	0	0	0	0	0	0	0	0	0	0	0	0	0	0	0	0	17	0	32	0	0
d__Bacteria	k__norank_d__Bacteria	p__Chloroflexi	c__Anaerolineae	o__Caldilineales	f__Caldilineaceae	g__norank_f__Caldilineaceae	s__uncultured_bacterium_f__Caldilineaceae	ASV41194	0	0	0	0	0	0	0	0	0	0	0	0	0	0	0	0	0	0	0	10	0	0	0	0	0	0	0	0	0	0	0	0	0	0	0	0	0	0	0	0	0
d__Bacteria	k__norank_d__Bacteria	p__Myxococcota	c__Polyangia	o__Haliangiales	f__Haliangiaceae	g__Haliangium	s__unclassified_g__Haliangium	ASV49305	0	0	0	0	0	0	0	0	0	4	0	0	0	0	0	0	0	0	0	0	0	0	0	0	0	0	0	0	0	0	0	0	0	0	0	0	0	0	0	0	0
d__Bacteria	k__norank_d__Bacteria	p__Acidobacteriota	c__Vicinamibacteria	o__Subgroup_9	f__norank_o__Subgroup_9	g__norank_o__Subgroup_9	s__unclassified_g__norank_o__Subgroup_9	ASV72496	0	0	0	0	0	0	0	0	0	0	0	0	0	0	0	0	0	0	0	0	0	0	0	0	0	9	0	0	0	0	0	0	0	0	0	0	0	0	0	0	0
d__Bacteria	k__norank_d__Bacteria	p__Acidobacteriota	c__Vicinamibacteria	o__Subgroup_9	f__norank_o__Subgroup_9	g__norank_o__Subgroup_9	s__unclassified_g__norank_o__Subgroup_9	ASV99202	0	0	0	0	0	0	0	0	0	0	0	0	0	0	0	0	3	0	0	0	0	0	0	0	0	0	0	0	0	0	0	0	0	0	0	0	0	0	0	0	0
d__Bacteria	k__norank_d__Bacteria	p__Firmicutes	c__Bacilli	o__Bacillales	f__Bacillaceae	g__Bacillus	s__unclassified_g__Bacillus	ASV47160	0	0	0	2	0	0	0	0	0	0	0	0	0	0	0	0	0	0	0	0	0	0	0	0	0	0	0	0	0	0	0	0	0	0	0	0	0	0	0	0	0
d__Bacteria	k__norank_d__Bacteria	p__Actinobacteriota	c__Acidimicrobiia	o__Microtrichales	f__norank_o__Microtrichales	g__norank_o__Microtrichales	s__unclassified_g__norank_o__Microtrichales	ASV55042	0	0	0	0	0	0	0	0	0	0	0	0	0	0	0	0	0	0	0	0	0	0	0	0	0	0	0	0	0	0	0	0	0	0	0	0	0	0	0	0	0
d__Bacteria	k__norank_d__Bacteria	p__Proteobacteria	c__Gammaproteobacteria	o__Pseudomonadales	f__Moraxellaceae	g__Acinetobacter	s__unclassified_g__Acinetobacter	ASV89241	0	0	0	0	0	0	0	0	0	0	0	0	0	0	0	0	0	0	0	0	0	0	0	0	0	0	0	0	0	0	0	0	0	0	0	0	0	0	0	0	0
d__Bacteria	k__norank_d__Bacteria	p__Verrucomicrobiota	c__Chlamydiae	o__Chlamydiales	f__Simkaniaceae	g__unclassified_f__Simkaniaceae	s__unclassified_f__Simkaniaceae	ASV80110	0	0	0	0	0	0	0	0	0	0	0	0	0	0	0	0	0	0	0	0	0	0	0	0	0	0	0	0	0	3	0	0	0	0	0	0	0	0	0	0	0
d__Bacteria	k__norank_d__Bacteria	p__Proteobacteria	c__Gammaproteobacteria	o__Gammaproteobacteria_Incertae_Sedis	f__unclassified_o__Gammaproteobacteria_Incertae_Sedis	g__norank_f__unclassified_o__Gammaproteobacteria_Incertae_Sedis	s__unclassified_g__norank_f__unclassified_o__Gammaproteobacteria_Incertae_Sedis	ASV25397	0	0	0	0	0	0	0	0	0	0	0	0	0	0	0	0	0	0	0	0	0	6	0	7	0	0	0	0	0	30	0	0	0	0	0	0	0	0	0	0	0
d__Bacteria	k__norank_d__Bacteria	p__unclassified_k__norank_d__Bacteria	c__unclassified_k__norank_d__Bacteria	o__unclassified_k__norank_d__Bacteria	f__unclassified_k__norank_d__Bacteria	g__unclassified_k__norank_d__Bacteria	s__unclassified_k__norank_d__Bacteria	ASV27188	0	0	0	0	0	0	0	0	0	0	0	0	0	0	0	0	0	0	0	0	0	1	0	0	0	0	0	0	0	0	0	0	0	0	0	0	0	0	0	0	0
d__Bacteria	k__norank_d__Bacteria	p__unclassified_k__norank_d__Bacteria	c__unclassified_k__norank_d__Bacteria	o__unclassified_k__norank_d__Bacteria	f__unclassified_k__norank_d__Bacteria	g__unclassified_k__norank_d__Bacteria	s__unclassified_k__norank_d__Bacteria	ASV17802	0	0	0	0	0	0	0	0	0	0	0	0	0	0	0	0	0	0	0	0	0	0	0	0	0	0	4	0	0	0	0	0	0	0	0	0	0	0	0	0	0
d__Bacteria	k__norank_d__Bacteria	p__Myxococcota	c__unclassified_p__Myxococcota	o__unclassified_p__Myxococcota	f__unclassified_p__Myxococcota	g__unclassified_p__Myxococcota	s__unclassified_p__Myxococcota	ASV37945	0	0	0	0	0	0	0	0	0	0	0	0	0	0	0	0	0	0	3	3	0	0	0	0	0	0	0	0	0	0	0	0	0	0	0	0	0	0	0	0	0
d__Bacteria	k__norank_d__Bacteria	p__Actinobacteriota	c__Thermoleophilia	o__Gaiellales	f__norank_o__Gaiellales	g__norank_o__Gaiellales	s__uncultured_bacterium_o__Gaiellales	ASV66702	0	0	1	0	0	0	0	0	0	0	0	0	0	0	0	0	0	0	0	0	0	0	0	0	0	0	0	0	0	0	0	0	0	0	0	0	0	0	0	0	0
d__Bacteria	k__norank_d__Bacteria	p__Proteobacteria	c__Alphaproteobacteria	o__Rhodobacterales	f__Rhodobacteraceae	g__unclassified_f__Rhodobacteraceae	s__unclassified_f__Rhodobacteraceae	ASV5445	0	0	0	0	0	0	0	0	0	0	0	0	0	0	3	0	0	0	0	0	0	0	0	0	0	0	0	0	0	0	0	0	0	0	0	0	0	0	0	0	0
d__Bacteria	k__norank_d__Bacteria	p__unclassified_k__norank_d__Bacteria	c__unclassified_k__norank_d__Bacteria	o__unclassified_k__norank_d__Bacteria	f__unclassified_k__norank_d__Bacteria	g__unclassified_k__norank_d__Bacteria	s__unclassified_k__norank_d__Bacteria	ASV79332	0	0	0	0	0	0	0	0	0	0	0	0	0	0	0	0	0	0	0	0	0	0	0	0	0	0	0	0	0	0	0	2	0	0	0	0	0	0	0	0	0
d__Bacteria	k__norank_d__Bacteria	p__Myxococcota	c__Polyangia	o__Polyangiales	f__Sandaracinaceae	g__norank_f__Sandaracinaceae	s__unclassified_g__norank_f__Sandaracinaceae	ASV93786	0	0	0	0	0	0	0	0	0	0	0	0	0	0	0	0	0	0	0	0	0	0	0	0	0	0	0	0	0	0	0	0	0	0	0	0	0	0	0	0	0
d__Bacteria	k__norank_d__Bacteria	p__Proteobacteria	c__Alphaproteobacteria	o__Rhizobiales	f__Rhizobiales_Incertae_Sedis	g__norank_f__Rhizobiales_Incertae_Sedis	s__unclassified_g__norank_f__Rhizobiales_Incertae_Sedis	ASV813	0	0	0	0	0	0	0	0	0	0	0	0	0	0	0	0	0	0	0	0	0	0	0	0	0	0	0	0	0	0	0	0	0	0	0	0	0	0	0	19	22
d__Bacteria	k__norank_d__Bacteria	p__unclassified_k__norank_d__Bacteria	c__unclassified_k__norank_d__Bacteria	o__unclassified_k__norank_d__Bacteria	f__unclassified_k__norank_d__Bacteria	g__unclassified_k__norank_d__Bacteria	s__unclassified_k__norank_d__Bacteria	ASV87086	0	0	0	0	0	0	0	0	0	0	0	0	0	0	0	0	0	0	0	0	0	0	0	4	0	0	0	0	0	0	0	0	0	0	0	0	0	0	0	0	0
d__Bacteria	k__norank_d__Bacteria	p__Bacteroidota	c__Bacteroidia	o__Bacteroidales	f__unclassified_o__Bacteroidales	g__unclassified_o__Bacteroidales	s__unclassified_o__Bacteroidales	ASV91876	0	0	0	0	0	0	0	0	0	0	0	0	0	0	0	0	0	0	0	0	2	0	0	0	0	0	0	0	0	0	0	0	0	0	0	0	0	0	0	0	0
d__Bacteria	k__norank_d__Bacteria	p__Proteobacteria	c__Alphaproteobacteria	o__Rhodobacterales	f__Rhodobacteraceae	g__unclassified_f__Rhodobacteraceae	s__unclassified_f__Rhodobacteraceae	ASV19110	0	0	0	0	0	0	0	0	0	0	0	0	0	0	0	0	0	0	0	0	0	0	0	0	0	0	1	0	0	0	0	0	0	0	0	0	0	0	0	0	0
d__Bacteria	k__norank_d__Bacteria	p__Bacteroidota	c__Bacteroidia	o__Sphingobacteriales	f__AKYH767	g__norank_f__AKYH767	s__uncultured_bacterium_f__AKYH767	ASV76045	0	0	0	0	0	0	0	0	0	0	0	0	0	0	0	0	0	0	0	0	0	0	0	0	0	0	0	0	0	0	0	0	0	0	0	0	0	0	0	1	0
d__Bacteria	k__norank_d__Bacteria	p__unclassified_k__norank_d__Bacteria	c__unclassified_k__norank_d__Bacteria	o__unclassified_k__norank_d__Bacteria	f__unclassified_k__norank_d__Bacteria	g__unclassified_k__norank_d__Bacteria	s__unclassified_k__norank_d__Bacteria	ASV44379	0	0	0	0	0	0	2	0	0	0	0	0	0	0	0	0	0	0	0	0	0	0	0	0	0	0	0	0	0	0	0	0	0	0	0	0	0	0	0	0	0
d__Bacteria	k__norank_d__Bacteria	p__Chloroflexi	c__Anaerolineae	o__unclassified_c__Anaerolineae	f__unclassified_c__Anaerolineae	g__unclassified_c__Anaerolineae	s__unclassified_c__Anaerolineae	ASV12910	0	0	0	0	0	0	0	0	0	0	0	0	2	0	0	0	0	0	0	0	0	0	0	0	0	0	0	0	0	0	0	0	0	0	0	0	0	0	0	0	0
d__Bacteria	k__norank_d__Bacteria	p__unclassified_k__norank_d__Bacteria	c__unclassified_k__norank_d__Bacteria	o__unclassified_k__norank_d__Bacteria	f__unclassified_k__norank_d__Bacteria	g__unclassified_k__norank_d__Bacteria	s__unclassified_k__norank_d__Bacteria	ASV78309	0	0	0	0	0	0	0	0	0	0	0	0	0	0	0	0	0	0	0	0	0	0	0	0	0	0	0	0	0	0	0	4	0	0	0	0	0	0	0	0	0
d__Bacteria	k__norank_d__Bacteria	p__Firmicutes	c__Clostridia	o__Lachnospirales	f__Defluviitaleaceae	g__Defluviitaleaceae_UCG-011	s__uncultured_bacterium_g__Defluviitaleaceae_UCG-011	ASV56178	0	2	0	0	0	2	0	0	0	0	0	0	0	0	0	0	0	0	0	0	0	0	0	0	0	0	0	0	0	0	0	0	0	0	0	0	0	0	0	0	0
d__Bacteria	k__norank_d__Bacteria	p__unclassified_k__norank_d__Bacteria	c__unclassified_k__norank_d__Bacteria	o__unclassified_k__norank_d__Bacteria	f__unclassified_k__norank_d__Bacteria	g__unclassified_k__norank_d__Bacteria	s__unclassified_k__norank_d__Bacteria	ASV60302	0	0	0	0	0	0	0	0	0	0	0	0	0	0	0	0	0	0	0	0	0	0	0	0	0	0	0	0	0	0	0	0	0	0	0	0	0	0	0	0	0
d__Bacteria	k__norank_d__Bacteria	p__Desulfobacterota	c__Desulfobacteria	o__Desulfobacterales	f__Desulfosarcinaceae	g__Sva0081_sediment_group	s__unclassified_g__Sva0081_sediment_group	ASV14309	13	16	34	22	0	57	10	16	30	0	0	0	0	0	0	0	0	0	0	0	0	0	0	0	0	0	0	0	0	0	0	0	0	0	0	0	0	0	0	0	0
d__Bacteria	k__norank_d__Bacteria	p__Firmicutes	c__Clostridia	o__Oscillospirales	f__Ruminococcaceae	g__Caproiciproducens	s__uncultured_bacterium_g__Caproiciproducens	ASV57848	0	0	0	0	0	0	0	0	0	0	0	0	0	0	0	0	0	0	0	0	0	0	0	0	0	0	0	0	0	0	0	0	4	0	0	0	0	0	0	0	0
d__Bacteria	k__norank_d__Bacteria	p__unclassified_k__norank_d__Bacteria	c__unclassified_k__norank_d__Bacteria	o__unclassified_k__norank_d__Bacteria	f__unclassified_k__norank_d__Bacteria	g__unclassified_k__norank_d__Bacteria	s__unclassified_k__norank_d__Bacteria	ASV100438	0	0	0	0	0	0	0	0	0	0	0	0	0	0	0	0	2	0	0	0	0	0	0	0	0	0	0	0	0	0	0	0	0	0	0	0	0	0	0	0	0
d__Bacteria	k__norank_d__Bacteria	p__Bacteroidota	c__Bacteroidia	o__Flavobacteriales	f__Flavobacteriaceae	g__Robiginitalea	s__uncultured_Bacteroidetes_bacterium_g__Robiginitalea	ASV40967	0	0	0	0	0	0	0	0	0	0	0	0	0	0	0	0	0	0	0	0	0	0	0	0	0	0	0	0	0	0	0	0	0	0	0	0	0	1	0	0	0
d__Bacteria	k__norank_d__Bacteria	p__Myxococcota	c__Polyangia	o__Polyangiales	f__Eel-36e1D6	g__norank_f__Eel-36e1D6	s__unclassified_g__norank_f__Eel-36e1D6	ASV58244	0	0	0	0	0	0	0	0	0	0	0	0	0	0	0	0	0	0	0	0	0	0	0	0	0	0	0	0	0	0	0	0	1	0	0	0	0	0	0	0	0
d__Bacteria	k__norank_d__Bacteria	p__Proteobacteria	c__Gammaproteobacteria	o__Cellvibrionales	f__Cellvibrionaceae	g__unclassified_f__Cellvibrionaceae	s__unclassified_f__Cellvibrionaceae	ASV5628	0	0	0	0	0	0	0	0	0	0	0	0	0	0	3	0	0	0	0	0	0	0	0	0	0	0	0	0	0	0	0	0	0	0	0	0	0	0	0	0	0
d__Bacteria	k__norank_d__Bacteria	p__Campilobacterota	c__Campylobacteria	o__Campylobacterales	f__Sulfurovaceae	g__Sulfurovum	s__unclassified_g__Sulfurovum	ASV4638	0	0	0	0	0	0	0	0	0	0	0	0	0	0	3	0	0	0	0	0	0	0	0	0	0	0	0	0	0	0	0	0	0	0	0	0	0	0	0	0	0
d__Bacteria	k__norank_d__Bacteria	p__Proteobacteria	c__Gammaproteobacteria	o__unclassified_c__Gammaproteobacteria	f__unclassified_c__Gammaproteobacteria	g__unclassified_c__Gammaproteobacteria	s__unclassified_c__Gammaproteobacteria	ASV72416	0	0	0	0	0	0	0	0	0	0	0	0	0	0	0	0	0	0	0	0	0	0	0	0	0	11	0	0	0	0	0	0	0	0	0	0	0	0	0	0	0
d__Bacteria	k__norank_d__Bacteria	p__Chloroflexi	c__Anaerolineae	o__SBR1031	f__norank_o__SBR1031	g__norank_o__SBR1031	s__uncultured_bacterium_o__SBR1031	ASV14326	0	0	0	0	0	0	0	15	6	0	0	0	0	0	0	0	0	0	0	0	0	0	0	0	0	0	0	0	0	0	0	0	0	0	0	0	0	0	0	0	0
d__Bacteria	k__norank_d__Bacteria	p__Latescibacterota	c__norank_p__Latescibacterota	o__norank_p__Latescibacterota	f__norank_p__Latescibacterota	g__norank_p__Latescibacterota	s__uncultured_bacterium_p__Latescibacterota	ASV70532	0	0	0	0	0	0	0	0	0	0	2	0	0	0	0	0	0	0	0	0	0	0	0	0	0	0	0	0	0	0	0	0	0	0	0	0	0	0	0	0	0
d__Bacteria	k__norank_d__Bacteria	p__Desulfobacterota	c__Desulfobulbia	o__Desulfobulbales	f__Desulfocapsaceae	g__unclassified_f__Desulfocapsaceae	s__unclassified_f__Desulfocapsaceae	ASV7677	39	41	72	67	94	67	55	0	40	0	0	0	0	0	0	31	8	0	0	0	0	0	22	0	5	26	0	0	20	0	29	29	16	29	24	17	31	14	0	0	0
d__Bacteria	k__norank_d__Bacteria	p__Proteobacteria	c__Alphaproteobacteria	o__Rhizobiales	f__Xanthobacteraceae	g__Bradyrhizobium	s__unclassified_g__Bradyrhizobium	ASV85137	0	0	0	0	0	0	0	0	0	0	0	0	0	0	0	0	0	0	0	0	0	0	0	0	0	0	0	0	0	0	0	0	0	0	0	0	0	0	0	0	0
d__Bacteria	k__norank_d__Bacteria	p__Nitrospinota	c__P9X2b3D02	o__norank_c__P9X2b3D02	f__norank_c__P9X2b3D02	g__norank_c__P9X2b3D02	s__uncultured_prokaryote_c__P9X2b3D02	ASV69639	0	0	0	0	0	0	0	0	0	0	0	0	0	0	0	1	0	0	0	0	0	0	0	0	0	0	0	0	0	0	0	0	0	0	0	0	0	0	0	0	0
d__Bacteria	k__norank_d__Bacteria	p__Proteobacteria	c__Gammaproteobacteria	o__Burkholderiales	f__Rhodocyclaceae	g__unclassified_f__Rhodocyclaceae	s__unclassified_f__Rhodocyclaceae	ASV98563	0	0	0	0	0	0	0	0	0	0	0	0	0	0	0	0	10	0	0	0	0	0	0	0	0	0	0	0	0	0	0	0	0	0	0	0	0	0	0	0	0
d__Bacteria	k__norank_d__Bacteria	p__Desulfobacterota	c__Desulfobacteria	o__Desulfobacterales	f__Desulfosarcinaceae	g__unclassified_f__Desulfosarcinaceae	s__unclassified_f__Desulfosarcinaceae	ASV62742	0	0	0	0	0	0	0	0	0	0	0	0	0	2	0	0	0	0	0	0	0	0	0	0	0	0	0	0	0	0	0	0	0	0	0	0	0	0	0	0	0
d__Bacteria	k__norank_d__Bacteria	p__Patescibacteria	c__Parcubacteria	o__Candidatus_Kaiserbacteria	f__norank_o__Candidatus_Kaiserbacteria	g__norank_o__Candidatus_Kaiserbacteria	s__uncultured_organism_o__Candidatus_Kaiserbacteria	ASV97515	0	0	0	0	0	0	0	0	0	0	0	0	0	0	0	0	0	0	0	0	0	0	0	0	5	0	0	0	0	0	0	0	0	0	0	0	0	0	0	0	0
d__Bacteria	k__norank_d__Bacteria	p__Proteobacteria	c__Alphaproteobacteria	o__unclassified_c__Alphaproteobacteria	f__unclassified_c__Alphaproteobacteria	g__unclassified_c__Alphaproteobacteria	s__unclassified_c__Alphaproteobacteria	ASV23375	0	0	0	0	0	0	0	0	0	0	0	0	0	0	0	0	0	2	0	0	0	0	0	0	0	0	0	0	0	0	0	0	0	0	0	0	0	0	0	0	0
d__Bacteria	k__norank_d__Bacteria	p__Acidobacteriota	c__Thermoanaerobaculia	o__Thermoanaerobaculales	f__Thermoanaerobaculaceae	g__Subgroup_23	s__uncultured_bacterium_g__Subgroup_23	ASV21944	0	0	0	0	0	0	0	0	0	0	0	0	0	0	0	0	0	7	0	0	0	0	0	0	0	0	0	0	0	0	0	0	0	0	0	0	0	0	0	0	0
d__Bacteria	k__norank_d__Bacteria	p__Patescibacteria	c__Saccharimonadia	o__Saccharimonadales	f__Saccharimonadaceae	g__unclassified_f__Saccharimonadaceae	s__unclassified_f__Saccharimonadaceae	ASV1872	0	0	0	0	0	0	0	0	0	0	0	0	0	0	0	0	0	0	0	0	0	0	0	0	0	0	0	0	0	0	0	0	0	0	0	0	0	0	0	0	0
d__Bacteria	k__norank_d__Bacteria	p__Bacteroidota	c__Bacteroidia	o__Flavobacteriales	f__Flavobacteriaceae	g__norank_f__Flavobacteriaceae	s__Robertkochia_marina	ASV7655	0	0	0	0	0	0	0	0	0	0	0	0	0	0	0	0	0	0	0	0	0	0	0	0	10	0	0	0	17	0	0	0	0	0	0	0	5	14	0	0	0
d__Bacteria	k__norank_d__Bacteria	p__Bacteroidota	c__Bacteroidia	o__Flavobacteriales	f__Flavobacteriaceae	g__Robiginitalea	s__Robiginitalea_sp._ZH09	ASV89112	0	0	0	0	0	0	0	0	0	0	0	0	0	0	0	0	0	0	0	0	0	0	0	0	0	0	0	0	0	0	0	0	0	0	0	0	0	0	0	0	0
d__Bacteria	k__norank_d__Bacteria	p__Nitrospinota	c__P9X2b3D02	o__norank_c__P9X2b3D02	f__norank_c__P9X2b3D02	g__norank_c__P9X2b3D02	s__unclassified_g__norank_c__P9X2b3D02	ASV12134	0	0	0	0	0	0	0	0	0	0	0	0	3	0	0	0	0	0	0	0	0	0	0	0	0	0	0	0	0	0	0	0	0	0	0	0	0	0	0	0	0
d__Bacteria	k__norank_d__Bacteria	p__Bdellovibrionota	c__Oligoflexia	o__Oligoflexales	f__norank_o__Oligoflexales	g__norank_o__Oligoflexales	s__uncultured_bacterium_o__Oligoflexales	ASV82598	0	0	0	0	0	0	0	0	0	0	0	0	0	0	0	0	0	0	0	0	0	0	0	0	0	0	0	0	0	0	0	0	0	0	0	0	0	0	2	0	0
d__Bacteria	k__norank_d__Bacteria	p__unclassified_k__norank_d__Bacteria	c__unclassified_k__norank_d__Bacteria	o__unclassified_k__norank_d__Bacteria	f__unclassified_k__norank_d__Bacteria	g__unclassified_k__norank_d__Bacteria	s__unclassified_k__norank_d__Bacteria	ASV87715	0	0	0	0	0	0	0	0	0	0	0	0	0	0	0	0	0	0	0	0	0	0	0	2	0	0	0	0	0	0	0	0	0	0	0	0	0	0	0	0	0
d__Bacteria	k__norank_d__Bacteria	p__Desulfobacterota	c__Desulfobacteria	o__Desulfobacterales	f__Desulfosarcinaceae	g__Sva0081_sediment_group	s__unclassified_g__Sva0081_sediment_group	ASV25373	0	0	0	0	0	0	0	0	0	0	0	0	0	0	0	0	0	0	0	0	0	10	0	0	0	0	0	0	0	0	0	0	0	0	0	0	0	0	0	0	0
d__Bacteria	k__norank_d__Bacteria	p__Desulfobacterota	c__Desulfobacteria	o__Desulfobacterales	f__Desulfolunaceae	g__norank_f__Desulfolunaceae	s__uncultured_delta_proteobacterium_f__Desulfolunaceae	ASV39183	0	0	0	0	0	0	0	0	0	0	0	0	0	0	0	0	0	0	1	0	0	0	0	0	0	0	0	0	0	0	0	0	0	0	0	0	0	0	0	0	0
d__Bacteria	k__norank_d__Bacteria	p__unclassified_k__norank_d__Bacteria	c__unclassified_k__norank_d__Bacteria	o__unclassified_k__norank_d__Bacteria	f__unclassified_k__norank_d__Bacteria	g__unclassified_k__norank_d__Bacteria	s__unclassified_k__norank_d__Bacteria	ASV73293	0	0	0	0	0	0	0	0	0	0	0	0	0	0	0	0	0	0	0	0	0	0	0	0	0	3	0	0	0	0	0	0	0	0	0	0	0	0	0	0	0
d__Bacteria	k__norank_d__Bacteria	p__Firmicutes	c__Clostridia	o__Peptostreptococcales-Tissierellales	f__norank_o__Peptostreptococcales-Tissierellales	g__unclassified_f__norank_o__Peptostreptococcales-Tissierellales	s__unclassified_f__norank_o__Peptostreptococcales-Tissierellales	ASV78146	0	0	0	0	0	0	0	0	0	0	0	0	0	0	0	0	0	0	0	0	0	0	0	0	0	0	0	0	0	0	0	4	0	0	0	0	0	0	0	0	0
d__Bacteria	k__norank_d__Bacteria	p__Bacteroidota	c__Bacteroidia	o__Flavobacteriales	f__Crocinitomicaceae	g__Fluviicola	s__bacterium_SH1-3	ASV98553	0	0	0	0	0	0	0	0	0	0	0	0	0	0	0	0	13	0	0	0	0	0	0	0	0	0	0	0	0	0	0	0	0	0	0	0	0	0	0	0	0
d__Bacteria	k__norank_d__Bacteria	p__Actinobacteriota	c__Acidimicrobiia	o__Microtrichales	f__Ilumatobacteraceae	g__Ilumatobacter	s__unclassified_g__Ilumatobacter	ASV57375	0	0	0	0	0	0	0	0	0	0	0	0	0	0	0	0	0	0	0	0	0	0	0	0	0	0	0	0	0	0	28	0	22	0	0	0	0	0	0	0	0
d__Bacteria	k__norank_d__Bacteria	p__Firmicutes	c__Bacilli	o__Bacillales	f__Bacillaceae	g__unclassified_f__Bacillaceae	s__unclassified_f__Bacillaceae	ASV11145	0	0	0	0	0	0	0	0	0	0	0	0	7	0	0	0	0	0	0	0	0	0	0	0	0	0	0	0	0	0	0	0	0	0	0	0	0	0	0	0	0
d__Bacteria	k__norank_d__Bacteria	p__unclassified_k__norank_d__Bacteria	c__unclassified_k__norank_d__Bacteria	o__unclassified_k__norank_d__Bacteria	f__unclassified_k__norank_d__Bacteria	g__unclassified_k__norank_d__Bacteria	s__unclassified_k__norank_d__Bacteria	ASV30039	0	0	0	0	0	0	0	0	0	0	0	0	0	0	0	0	0	0	0	0	0	0	2	0	0	0	0	0	0	0	0	0	0	0	0	0	0	0	0	0	0
d__Bacteria	k__norank_d__Bacteria	p__Proteobacteria	c__Alphaproteobacteria	o__unclassified_c__Alphaproteobacteria	f__unclassified_c__Alphaproteobacteria	g__unclassified_c__Alphaproteobacteria	s__unclassified_c__Alphaproteobacteria	ASV68554	0	0	0	0	0	0	0	0	0	0	0	0	0	0	0	2	0	0	0	0	0	0	0	0	0	0	0	0	0	0	0	0	0	0	0	0	0	0	0	0	0
d__Bacteria	k__norank_d__Bacteria	p__Verrucomicrobiota	c__Verrucomicrobiae	o__Verrucomicrobiales	f__Rubritaleaceae	g__Luteolibacter	s__uncultured_bacterium_g__Luteolibacter	ASV53758	0	0	0	0	0	0	0	0	0	0	0	0	0	0	0	0	0	0	0	0	0	0	0	0	0	0	0	0	0	0	0	0	0	0	0	0	0	0	0	0	0
d__Bacteria	k__norank_d__Bacteria	p__Bacteroidota	c__Bacteroidia	o__Bacteroidales	f__Marinilabiliaceae	g__Labilibacter	s__uncultured_Bacteroidetes_bacterium_g__Labilibacter	ASV47566	0	0	5	0	0	0	0	0	8	0	0	0	0	0	0	0	0	0	0	0	0	0	0	0	0	0	0	0	0	0	0	0	0	0	0	0	0	0	0	0	0
d__Bacteria	k__norank_d__Bacteria	p__Bacteroidota	c__Rhodothermia	o__Rhodothermales	f__Rhodothermaceae	g__norank_f__Rhodothermaceae	s__uncultured_bacterium_f__Rhodothermaceae	ASV7942	0	0	0	0	0	0	0	0	0	0	0	0	0	0	0	0	0	0	0	0	0	0	0	0	0	0	0	20	11	0	0	0	0	0	0	0	0	5	3	0	0
d__Bacteria	k__norank_d__Bacteria	p__Proteobacteria	c__Gammaproteobacteria	o__Cellvibrionales	f__Halieaceae	g__unclassified_f__Halieaceae	s__unclassified_f__Halieaceae	ASV79504	0	0	0	0	0	0	0	0	0	0	0	0	0	0	0	0	0	0	0	0	0	0	0	0	0	0	0	0	0	0	0	2	0	0	0	0	0	0	0	0	0
d__Bacteria	k__norank_d__Bacteria	p__Dadabacteria	c__Dadabacteriia	o__Dadabacteriales	f__norank_o__Dadabacteriales	g__norank_o__Dadabacteriales	s__unclassified_g__norank_o__Dadabacteriales	ASV70280	0	0	0	0	0	0	0	0	0	0	5	0	0	0	0	0	0	0	0	0	0	0	0	0	0	0	0	0	0	0	0	0	0	0	0	0	0	0	0	0	0
d__Bacteria	k__norank_d__Bacteria	p__NB1-j	c__norank_p__NB1-j	o__norank_p__NB1-j	f__norank_p__NB1-j	g__norank_p__NB1-j	s__unclassified_g__norank_p__NB1-j	ASV22860	0	0	0	0	0	0	0	0	0	0	0	0	0	0	0	16	7	4	0	0	0	0	0	0	0	0	0	0	0	0	0	0	0	0	0	0	0	0	0	0	0
d__Bacteria	k__norank_d__Bacteria	p__Desulfobacterota	c__Desulfobulbia	o__Desulfobulbales	f__Desulfocapsaceae	g__unclassified_f__Desulfocapsaceae	s__unclassified_f__Desulfocapsaceae	ASV60933	0	0	0	0	0	0	0	0	0	0	0	0	0	7	0	0	0	0	0	0	0	0	0	0	0	0	0	0	0	0	0	0	0	0	0	0	0	0	0	0	0
d__Bacteria	k__norank_d__Bacteria	p__Chloroflexi	c__Anaerolineae	o__Caldilineales	f__Caldilineaceae	g__norank_f__Caldilineaceae	s__uncultured_bacterium_f__Caldilineaceae	ASV995	0	0	0	0	0	0	0	0	0	0	0	0	0	0	0	0	0	0	0	0	0	0	0	0	0	0	0	0	0	0	0	0	0	0	0	0	0	0	0	0	0
d__Bacteria	k__norank_d__Bacteria	p__Gemmatimonadota	c__BD2-11_terrestrial_group	o__norank_c__BD2-11_terrestrial_group	f__norank_c__BD2-11_terrestrial_group	g__norank_c__BD2-11_terrestrial_group	s__uncultured_bacterium_c__BD2-11_terrestrial_group	ASV56746	0	2	0	0	0	0	0	0	0	0	0	0	0	0	0	0	0	0	0	0	0	0	0	0	0	0	0	0	0	0	0	0	0	0	0	0	0	0	0	0	0
d__Bacteria	k__norank_d__Bacteria	p__Proteobacteria	c__Gammaproteobacteria	o__unclassified_c__Gammaproteobacteria	f__unclassified_c__Gammaproteobacteria	g__unclassified_c__Gammaproteobacteria	s__unclassified_c__Gammaproteobacteria	ASV60314	0	0	0	0	0	0	0	0	0	0	0	0	0	0	0	0	0	0	0	0	0	0	0	0	0	0	0	0	0	0	0	0	0	0	0	0	0	0	0	0	0
d__Bacteria	k__norank_d__Bacteria	p__Desulfobacterota	c__Desulfobulbia	o__Desulfobulbales	f__Desulfobulbaceae	g__norank_f__Desulfobulbaceae	s__uncultured_gamma_proteobacterium_f__Desulfobulbaceae	ASV23578	0	0	0	0	0	0	0	0	0	0	0	0	0	0	0	0	0	2	0	0	0	0	0	0	0	0	0	0	0	0	0	0	0	0	0	0	0	0	0	0	0
d__Bacteria	k__norank_d__Bacteria	p__Proteobacteria	c__Alphaproteobacteria	o__Rhodobacterales	f__Rhodobacteraceae	g__unclassified_f__Rhodobacteraceae	s__unclassified_f__Rhodobacteraceae	ASV65509	0	0	3	0	0	0	0	0	0	0	0	0	0	0	0	0	0	0	0	0	0	0	0	0	0	0	0	0	0	0	0	0	0	0	0	0	0	0	0	0	0
d__Bacteria	k__norank_d__Bacteria	p__Verrucomicrobiota	c__Chlamydiae	o__Chlamydiales	f__unclassified_o__Chlamydiales	g__unclassified_o__Chlamydiales	s__unclassified_o__Chlamydiales	ASV26884	0	0	0	0	0	0	0	0	0	0	0	0	0	0	0	0	0	0	0	0	0	2	0	0	0	0	0	0	0	0	0	0	0	0	0	0	0	0	0	0	0
d__Bacteria	k__norank_d__Bacteria	p__Proteobacteria	c__Alphaproteobacteria	o__Rhodobacterales	f__Rhodobacteraceae	g__unclassified_f__Rhodobacteraceae	s__unclassified_f__Rhodobacteraceae	ASV16654	0	0	0	0	0	0	0	0	0	0	0	0	0	0	0	0	0	0	0	0	0	0	0	0	0	0	8	0	0	0	0	0	0	0	0	0	0	0	0	0	0
d__Bacteria	k__norank_d__Bacteria	p__Desulfobacterota	c__Desulfuromonadia	o__Sva1033	f__norank_o__Sva1033	g__norank_o__Sva1033	s__unclassified_g__norank_o__Sva1033	ASV4467	0	0	0	0	0	0	0	0	0	0	0	0	0	0	5	0	0	0	0	0	0	0	0	0	0	0	0	0	0	0	0	0	0	0	0	0	0	0	0	0	0
d__Bacteria	k__norank_d__Bacteria	p__Proteobacteria	c__Alphaproteobacteria	o__Rhodobacterales	f__Rhodobacteraceae	g__unclassified_f__Rhodobacteraceae	s__unclassified_f__Rhodobacteraceae	ASV9029	0	0	0	0	0	0	0	0	0	0	0	0	0	0	0	0	0	0	0	0	0	0	0	0	0	0	0	0	2	0	0	0	0	0	0	0	0	0	0	0	0
d__Bacteria	k__norank_d__Bacteria	p__unclassified_k__norank_d__Bacteria	c__unclassified_k__norank_d__Bacteria	o__unclassified_k__norank_d__Bacteria	f__unclassified_k__norank_d__Bacteria	g__unclassified_k__norank_d__Bacteria	s__unclassified_k__norank_d__Bacteria	ASV34812	0	0	0	0	0	0	0	0	0	0	0	0	0	0	0	0	0	0	0	0	0	0	0	0	0	0	0	0	0	0	0	0	0	0	0	0	0	0	0	0	0
d__Bacteria	k__norank_d__Bacteria	p__Acidobacteriota	c__Thermoanaerobaculia	o__Thermoanaerobaculales	f__Thermoanaerobaculaceae	g__Subgroup_23	s__unclassified_g__Subgroup_23	ASV26688	0	0	0	0	0	0	0	0	0	0	0	0	0	0	0	0	0	0	0	0	0	3	0	0	0	0	0	0	0	0	0	0	0	0	0	0	0	0	0	0	0
d__Bacteria	k__norank_d__Bacteria	p__unclassified_k__norank_d__Bacteria	c__unclassified_k__norank_d__Bacteria	o__unclassified_k__norank_d__Bacteria	f__unclassified_k__norank_d__Bacteria	g__unclassified_k__norank_d__Bacteria	s__unclassified_k__norank_d__Bacteria	ASV24374	0	0	0	0	0	0	0	0	0	0	0	0	0	0	0	0	0	2	0	0	0	0	0	0	0	0	0	0	0	0	0	0	0	0	0	0	0	0	0	0	0
d__Bacteria	k__norank_d__Bacteria	p__Gemmatimonadota	c__BD2-11_terrestrial_group	o__norank_c__BD2-11_terrestrial_group	f__norank_c__BD2-11_terrestrial_group	g__norank_c__BD2-11_terrestrial_group	s__uncultured_bacterium_c__BD2-11_terrestrial_group	ASV9503	0	0	0	0	0	0	0	0	0	0	0	0	0	0	0	0	0	0	0	0	0	0	0	0	0	0	0	0	2	0	0	0	0	0	0	0	0	0	0	0	0
d__Bacteria	k__norank_d__Bacteria	p__Acidobacteriota	c__Thermoanaerobaculia	o__Thermoanaerobaculales	f__Thermoanaerobaculaceae	g__Subgroup_23	s__unclassified_g__Subgroup_23	ASV14762	11	0	0	0	0	0	0	8	0	0	0	0	0	0	0	0	0	0	0	29	0	0	0	0	0	0	0	0	0	0	0	0	0	0	0	0	0	0	0	0	0
d__Bacteria	k__norank_d__Bacteria	p__Chloroflexi	c__Anaerolineae	o__Caldilineales	f__Caldilineaceae	g__norank_f__Caldilineaceae	s__unclassified_g__norank_f__Caldilineaceae	ASV4316	0	0	0	0	0	0	0	0	0	6	0	7	0	0	3	0	0	0	0	0	0	0	0	0	0	0	0	0	0	0	0	0	0	0	0	0	0	0	0	0	0
d__Bacteria	k__norank_d__Bacteria	p__Proteobacteria	c__Gammaproteobacteria	o__norank_c__Gammaproteobacteria	f__norank_c__Gammaproteobacteria	g__norank_c__Gammaproteobacteria	s__bacterium_enrichment_culture_clone_362013	ASV3510	0	0	0	0	0	0	0	0	0	0	0	0	0	0	9	0	0	0	0	0	0	0	0	0	0	0	0	0	0	0	0	0	0	0	0	0	0	0	0	0	0
d__Bacteria	k__norank_d__Bacteria	p__Chloroflexi	c__Anaerolineae	o__Caldilineales	f__Caldilineaceae	g__norank_f__Caldilineaceae	s__unclassified_g__norank_f__Caldilineaceae	ASV89485	0	0	0	0	0	0	0	0	0	0	0	0	0	0	0	0	0	0	0	0	0	0	0	0	0	0	0	0	0	0	0	0	0	0	0	0	0	0	0	0	0
d__Bacteria	k__norank_d__Bacteria	p__Proteobacteria	c__Gammaproteobacteria	o__Oceanospirillales	f__Pseudohongiellaceae	g__Pseudohongiella	s__unclassified_g__Pseudohongiella	ASV42232	0	0	0	0	0	0	0	0	0	0	0	0	0	0	0	0	0	0	0	3	0	0	0	0	0	0	0	0	0	0	0	0	0	0	0	0	0	0	0	0	0
d__Bacteria	k__norank_d__Bacteria	p__Acidobacteriota	c__Vicinamibacteria	o__Subgroup_9	f__norank_o__Subgroup_9	g__norank_o__Subgroup_9	s__unclassified_g__norank_o__Subgroup_9	ASV44676	0	0	0	0	0	0	2	0	0	0	0	0	0	0	0	0	0	0	0	0	0	0	0	0	0	0	0	0	0	0	0	0	0	0	0	0	0	0	0	0	0
d__Bacteria	k__norank_d__Bacteria	p__Firmicutes	c__Clostridia	o__Peptostreptococcales-Tissierellales	f__Anaerovoracaceae	g__unclassified_f__Anaerovoracaceae	s__unclassified_f__Anaerovoracaceae	ASV95909	0	0	0	0	0	0	0	0	0	0	0	0	0	0	0	0	0	0	0	0	0	0	0	0	0	0	0	0	0	0	0	0	0	0	0	0	0	0	0	0	3
d__Bacteria	k__norank_d__Bacteria	p__Firmicutes	c__Clostridia	o__Clostridiales	f__Clostridiaceae	g__Clostridium_sensu_stricto_7	s__unclassified_g__Clostridium_sensu_stricto_7	ASV30114	0	0	0	0	0	0	0	0	0	0	0	0	0	0	0	0	0	0	0	0	0	0	2	0	0	0	0	0	0	0	0	0	0	0	0	0	0	0	0	0	0
d__Bacteria	k__norank_d__Bacteria	p__Gemmatimonadota	c__BD2-11_terrestrial_group	o__norank_c__BD2-11_terrestrial_group	f__norank_c__BD2-11_terrestrial_group	g__norank_c__BD2-11_terrestrial_group	s__unclassified_g__norank_c__BD2-11_terrestrial_group	ASV57513	0	0	0	0	0	0	0	0	0	0	0	0	0	0	0	0	0	0	0	0	0	0	0	0	0	0	0	0	0	0	0	0	6	0	0	0	0	0	0	0	0
d__Bacteria	k__norank_d__Bacteria	p__Acidobacteriota	c__Thermoanaerobaculia	o__Thermoanaerobaculales	f__Thermoanaerobaculaceae	g__Subgroup_10	s__unclassified_g__Subgroup_10	ASV1013	0	0	0	0	0	0	0	0	0	0	0	0	0	0	0	0	0	0	0	0	0	0	0	0	7	0	2	0	0	0	0	0	0	0	4	0	0	6	0	5	1
d__Bacteria	k__norank_d__Bacteria	p__Proteobacteria	c__Alphaproteobacteria	o__Rhizobiales	f__Rhizobiales_Incertae_Sedis	g__norank_f__Rhizobiales_Incertae_Sedis	s__unclassified_g__norank_f__Rhizobiales_Incertae_Sedis	ASV14336	0	0	0	0	3	0	27	15	28	0	0	0	0	0	0	0	0	0	0	0	0	0	0	0	0	0	0	0	0	0	0	0	0	0	0	0	0	0	0	0	0
d__Bacteria	k__norank_d__Bacteria	p__Bacteroidota	c__Bacteroidia	o__Bacteroidales	f__Bacteroidetes_BD2-2	g__norank_f__Bacteroidetes_BD2-2	s__unclassified_g__norank_f__Bacteroidetes_BD2-2	ASV3323	0	0	0	0	0	0	0	0	0	0	0	10	0	0	11	0	0	0	0	0	0	0	0	0	0	0	0	0	0	0	0	0	0	0	0	0	0	0	0	0	3
d__Bacteria	k__norank_d__Bacteria	p__Chloroflexi	c__Anaerolineae	o__norank_c__Anaerolineae	f__norank_c__Anaerolineae	g__norank_c__Anaerolineae	s__unclassified_g__norank_c__Anaerolineae	ASV27647	0	0	0	0	0	0	0	0	0	0	0	0	0	0	0	0	0	0	0	0	0	0	0	0	0	0	0	0	0	0	0	0	17	12	0	0	19	0	0	0	0
d__Bacteria	k__norank_d__Bacteria	p__Bacteroidota	c__Bacteroidia	o__Cytophagales	f__Cyclobacteriaceae	g__Ekhidna	s__unclassified_g__Ekhidna	ASV100363	0	0	0	0	0	0	0	0	0	0	0	0	0	0	0	0	2	0	0	0	0	0	0	0	0	0	0	0	0	0	0	0	0	0	0	0	0	0	0	0	0
d__Bacteria	k__norank_d__Bacteria	p__Proteobacteria	c__Gammaproteobacteria	o__Diplorickettsiales	f__Diplorickettsiaceae	g__Aquicella	s__uncultured_bacterium_g__Aquicella	ASV95549	0	0	0	0	0	0	0	0	0	0	0	0	0	0	0	0	0	0	0	0	0	0	0	0	0	0	0	0	0	0	0	0	0	0	0	0	0	0	0	0	0
d__Bacteria	k__norank_d__Bacteria	p__Acidobacteriota	c__Subgroup_22	o__norank_c__Subgroup_22	f__norank_c__Subgroup_22	g__norank_c__Subgroup_22	s__uncultured_bacterium_c__Subgroup_22	ASV90060	0	0	0	0	0	0	0	0	0	0	0	0	0	0	0	0	0	0	0	0	7	0	0	0	0	0	0	0	0	0	0	0	0	0	0	0	0	0	0	0	0
d__Bacteria	k__norank_d__Bacteria	p__Planctomycetota	c__Pla4_lineage	o__norank_c__Pla4_lineage	f__norank_c__Pla4_lineage	g__norank_c__Pla4_lineage	s__unclassified_g__norank_c__Pla4_lineage	ASV4630	0	0	0	0	0	0	0	0	0	0	0	0	0	0	3	0	0	0	0	0	0	0	0	0	0	0	0	0	0	0	0	0	0	0	0	0	0	0	0	0	0
d__Bacteria	k__norank_d__Bacteria	p__unclassified_k__norank_d__Bacteria	c__unclassified_k__norank_d__Bacteria	o__unclassified_k__norank_d__Bacteria	f__unclassified_k__norank_d__Bacteria	g__unclassified_k__norank_d__Bacteria	s__unclassified_k__norank_d__Bacteria	ASV44796	0	0	0	0	0	0	2	0	0	0	0	0	0	0	0	0	0	0	0	0	0	0	0	0	0	0	0	0	0	0	0	0	0	0	0	0	0	0	0	0	0
d__Bacteria	k__norank_d__Bacteria	p__unclassified_k__norank_d__Bacteria	c__unclassified_k__norank_d__Bacteria	o__unclassified_k__norank_d__Bacteria	f__unclassified_k__norank_d__Bacteria	g__unclassified_k__norank_d__Bacteria	s__unclassified_k__norank_d__Bacteria	ASV78434	0	0	0	0	0	0	0	0	0	0	0	0	0	0	0	0	0	0	0	0	0	0	0	0	0	0	0	0	0	0	0	3	0	0	0	0	0	0	0	0	0
d__Bacteria	k__norank_d__Bacteria	p__Bacteroidota	c__Bacteroidia	o__Bacteroidales	f__unclassified_o__Bacteroidales	g__unclassified_o__Bacteroidales	s__unclassified_o__Bacteroidales	ASV55238	0	0	0	0	0	0	0	0	0	0	0	0	0	0	0	0	0	0	0	0	0	0	0	0	0	0	0	0	0	0	0	0	0	0	0	0	0	0	0	0	0
d__Bacteria	k__norank_d__Bacteria	p__Firmicutes	c__Clostridia	o__Lachnospirales	f__Lachnospiraceae	g__unclassified_f__Lachnospiraceae	s__unclassified_f__Lachnospiraceae	ASV62580	0	0	0	0	0	0	0	0	0	0	0	0	0	1	0	0	0	0	0	0	0	0	0	0	0	0	0	0	0	0	0	0	0	0	0	0	0	0	0	0	0
d__Bacteria	k__norank_d__Bacteria	p__Proteobacteria	c__Gammaproteobacteria	o__Burkholderiales	f__SC-I-84	g__norank_f__SC-I-84	s__uncultured_bacterium_f__SC-I-84	ASV92414	0	0	0	0	0	0	0	0	0	0	0	7	0	0	0	0	0	0	0	0	0	0	0	0	0	0	0	0	0	0	0	0	0	0	0	0	0	0	0	0	0
d__Bacteria	k__norank_d__Bacteria	p__Bacteroidota	c__Bacteroidia	o__Cytophagales	f__Cyclobacteriaceae	g__Ekhidna	s__unclassified_g__Ekhidna	ASV23608	0	0	0	0	0	0	0	0	0	0	0	0	0	0	0	0	0	2	0	0	0	0	0	0	0	0	0	0	0	0	0	0	0	0	0	0	0	0	0	0	0
d__Bacteria	k__norank_d__Bacteria	p__SAR324_cladeMarine_group_B	c__norank_p__SAR324_cladeMarine_group_B	o__norank_p__SAR324_cladeMarine_group_B	f__norank_p__SAR324_cladeMarine_group_B	g__norank_p__SAR324_cladeMarine_group_B	s__uncultured_delta_proteobacterium_Sva0853	ASV12940	0	0	0	0	0	0	0	0	0	0	0	0	1	0	0	0	0	0	0	0	0	0	0	0	0	0	0	0	0	0	0	0	0	0	0	0	0	0	0	0	0
d__Bacteria	k__norank_d__Bacteria	p__Firmicutes	c__Clostridia	o__Clostridiales	f__Clostridiaceae	g__Clostridium_sensu_stricto_10	s__unclassified_g__Clostridium_sensu_stricto_10	ASV95718	0	0	0	0	0	0	0	0	0	0	0	0	0	0	0	0	0	0	0	0	0	0	0	0	0	0	0	0	0	0	0	0	0	0	0	0	0	0	0	0	11
d__Bacteria	k__norank_d__Bacteria	p__Chloroflexi	c__Anaerolineae	o__Caldilineales	f__Caldilineaceae	g__norank_f__Caldilineaceae	s__uncultured_Anaerolineaceae_bacterium_f__Caldilineaceae	ASV98989	0	0	0	0	0	0	0	0	0	0	0	0	0	0	0	0	3	0	0	0	0	0	0	0	0	0	0	0	0	0	0	0	0	0	0	0	0	0	0	0	0
d__Bacteria	k__norank_d__Bacteria	p__Firmicutes	c__unclassified_p__Firmicutes	o__unclassified_p__Firmicutes	f__unclassified_p__Firmicutes	g__unclassified_p__Firmicutes	s__unclassified_p__Firmicutes	ASV96833	0	0	0	0	0	0	0	0	0	0	0	0	0	0	0	0	0	0	0	0	0	0	0	0	0	0	0	0	0	0	0	0	0	0	0	0	0	0	0	0	1
d__Bacteria	k__norank_d__Bacteria	p__Desulfobacterota	c__Desulfobulbia	o__Desulfobulbales	f__Desulfobulbaceae	g__Desulfobulbus	s__unclassified_g__Desulfobulbus	ASV10693	0	0	4	0	0	0	0	0	0	0	0	0	15	0	0	0	0	0	0	0	0	0	0	0	0	0	0	0	0	0	0	0	0	0	0	0	0	0	0	0	0
d__Bacteria	k__norank_d__Bacteria	p__Bacteroidota	c__Bacteroidia	o__Flavobacteriales	f__Flavobacteriaceae	g__norank_f__Flavobacteriaceae	s__unclassified_g__norank_f__Flavobacteriaceae	ASV14787	0	0	0	0	0	0	0	7	0	0	0	0	0	0	0	0	0	0	0	0	0	0	0	0	0	0	0	0	0	0	0	0	0	0	0	0	0	0	0	0	0
d__Bacteria	k__norank_d__Bacteria	p__Actinobacteriota	c__unclassified_p__Actinobacteriota	o__unclassified_p__Actinobacteriota	f__unclassified_p__Actinobacteriota	g__unclassified_p__Actinobacteriota	s__unclassified_p__Actinobacteriota	ASV40649	0	0	0	0	0	0	0	0	0	0	0	0	0	0	0	0	0	0	0	0	0	0	0	0	0	0	0	0	0	0	0	0	0	0	0	0	0	2	0	0	0
d__Bacteria	k__norank_d__Bacteria	p__Proteobacteria	c__Alphaproteobacteria	o__Reyranellales	f__Reyranellaceae	g__Reyranella	s__Reyranella_massiliensis	ASV56365	0	3	0	0	0	0	0	0	0	0	0	0	0	0	0	0	0	0	0	0	0	0	0	0	0	0	0	0	0	0	0	0	0	0	0	0	0	0	0	0	0
d__Bacteria	k__norank_d__Bacteria	p__Proteobacteria	c__Gammaproteobacteria	o__Gammaproteobacteria_Incertae_Sedis	f__unclassified_o__Gammaproteobacteria_Incertae_Sedis	g__Wenzhouxiangella	s__unclassified_g__Wenzhouxiangella	ASV20071	0	0	0	0	0	0	0	0	0	0	0	0	0	0	0	0	0	0	0	0	0	0	0	0	19	0	0	0	0	0	0	0	0	0	4	0	0	0	0	0	0
d__Bacteria	k__norank_d__Bacteria	p__Desulfobacterota	c__Desulfobacteria	o__unclassified_c__Desulfobacteria	f__unclassified_c__Desulfobacteria	g__unclassified_c__Desulfobacteria	s__unclassified_c__Desulfobacteria	ASV63003	0	0	0	0	0	0	0	0	0	0	0	0	0	0	0	0	0	0	0	0	0	0	0	0	0	0	0	0	0	0	0	0	0	0	0	4	0	0	0	0	0
d__Bacteria	k__norank_d__Bacteria	p__Proteobacteria	c__Gammaproteobacteria	o__MBMPE27	f__norank_o__MBMPE27	g__norank_o__MBMPE27	s__uncultured_Thioalkalivibrio_sp._o__MBMPE27	ASV99570	0	0	0	0	0	0	0	0	0	0	0	0	0	0	0	0	3	0	0	0	0	0	0	0	0	0	0	0	0	0	0	0	0	0	0	0	0	0	0	0	0
d__Bacteria	k__norank_d__Bacteria	p__Proteobacteria	c__Alphaproteobacteria	o__Rhizobiales	f__Rhodomicrobiaceae	g__Rhodomicrobium	s__unclassified_g__Rhodomicrobium	ASV67507	0	0	0	0	0	0	0	0	0	0	0	0	0	0	0	5	0	0	0	0	0	0	0	0	0	0	0	0	0	0	0	0	0	0	0	0	0	0	0	0	0
d__Bacteria	k__norank_d__Bacteria	p__Bacteroidota	c__Bacteroidia	o__Flavobacteriales	f__Flavobacteriaceae	g__Flavobacterium	s__unclassified_g__Flavobacterium	ASV53288	1	0	0	0	0	0	0	0	0	0	0	0	0	0	0	0	0	0	0	0	0	0	0	0	0	0	0	0	0	0	0	0	0	0	0	0	0	0	0	0	0
d__Bacteria	k__norank_d__Bacteria	p__Planctomycetota	c__Phycisphaerae	o__Phycisphaerales	f__Phycisphaeraceae	g__Urania-1B-19_marine_sediment_group	s__unclassified_g__Urania-1B-19_marine_sediment_group	ASV36323	0	0	0	0	0	0	0	0	0	0	0	0	0	0	0	0	0	0	0	0	0	0	0	0	0	0	0	4	0	0	0	0	0	0	0	0	0	0	0	0	0
d__Bacteria	k__norank_d__Bacteria	p__Proteobacteria	c__Gammaproteobacteria	o__EC3	f__norank_o__EC3	g__norank_o__EC3	s__unclassified_g__norank_o__EC3	ASV85470	0	0	0	0	0	0	0	0	0	0	0	0	0	0	0	0	0	0	0	0	0	0	0	0	0	0	0	0	0	0	0	0	0	0	0	0	0	0	0	0	0
d__Bacteria	k__norank_d__Bacteria	p__Proteobacteria	c__Alphaproteobacteria	o__Rhodobacterales	f__Rhodobacteraceae	g__unclassified_f__Rhodobacteraceae	s__unclassified_f__Rhodobacteraceae	ASV81147	0	0	0	0	0	0	0	0	0	0	0	0	0	0	0	0	0	0	0	0	0	0	0	0	0	0	0	0	0	2	0	0	0	0	0	0	0	0	0	0	0
d__Bacteria	k__norank_d__Bacteria	p__Cyanobacteria	c__Vampirivibrionia	o__Gastranaerophilales	f__norank_o__Gastranaerophilales	g__norank_o__Gastranaerophilales	s__uncultured_organism_o__Gastranaerophilales	ASV11541	0	0	0	0	0	0	0	0	0	0	0	0	4	0	0	0	0	0	0	0	0	0	0	0	0	0	0	0	0	0	0	0	0	0	0	0	0	0	0	0	0
d__Bacteria	k__norank_d__Bacteria	p__Bacteroidota	c__Bacteroidia	o__Flavobacteriales	f__Flavobacteriaceae	g__Muricauda	s__unclassified_g__Muricauda	ASV98601	0	0	0	0	0	0	0	0	0	0	0	0	0	0	0	0	7	0	0	0	0	0	0	0	0	0	0	0	0	0	0	0	0	0	0	0	0	0	0	0	0
d__Bacteria	k__norank_d__Bacteria	p__Acidobacteriota	c__Holophagae	o__Subgroup_7	f__norank_o__Subgroup_7	g__norank_o__Subgroup_7	s__unclassified_g__norank_o__Subgroup_7	ASV77503	0	0	0	0	0	0	0	0	0	0	0	0	0	0	0	0	0	0	0	0	0	0	0	0	0	0	0	0	0	0	0	0	0	0	0	0	0	0	0	0	0
d__Bacteria	k__norank_d__Bacteria	p__Chloroflexi	c__Anaerolineae	o__unclassified_c__Anaerolineae	f__unclassified_c__Anaerolineae	g__unclassified_c__Anaerolineae	s__unclassified_c__Anaerolineae	ASV34231	0	0	0	0	0	0	0	0	0	0	0	0	0	0	0	0	0	0	0	0	0	0	0	0	0	0	0	0	0	0	0	0	0	0	0	0	0	0	0	0	0
d__Bacteria	k__norank_d__Bacteria	p__Bacteroidota	c__Bacteroidia	o__Flavobacteriales	f__Flavobacteriaceae	g__Ascidiimonas	s__Flavobacteriaceae_bacterium_PAORIC-7	ASV91456	0	0	0	0	0	0	0	0	0	0	0	0	0	0	0	0	0	0	0	0	2	0	0	0	0	0	0	0	0	0	0	0	0	0	0	0	0	0	0	0	0
d__Bacteria	k__norank_d__Bacteria	p__Acidobacteriota	c__Vicinamibacteria	o__Vicinamibacterales	f__Vicinamibacteraceae	g__norank_f__Vicinamibacteraceae	s__uncultured_Acidobacterium_sp._f__Vicinamibacteraceae	ASV22216	0	0	0	0	0	0	0	0	0	0	0	0	0	0	0	0	3	6	0	0	0	0	0	0	0	0	0	0	0	0	0	0	0	0	0	0	0	0	0	0	0
d__Bacteria	k__norank_d__Bacteria	p__Chloroflexi	c__Anaerolineae	o__Anaerolineales	f__Anaerolineaceae	g__norank_f__Anaerolineaceae	s__uncultured_organism_f__Anaerolineaceae	ASV96225	0	0	0	0	0	0	0	0	0	0	0	0	0	0	0	0	0	0	0	0	0	0	0	0	0	0	0	0	0	0	0	0	0	0	0	0	0	0	0	0	1
d__Bacteria	k__norank_d__Bacteria	p__Chloroflexi	c__Anaerolineae	o__unclassified_c__Anaerolineae	f__unclassified_c__Anaerolineae	g__unclassified_c__Anaerolineae	s__unclassified_c__Anaerolineae	ASV99037	0	0	0	0	0	0	0	0	0	0	0	0	0	0	0	0	4	0	0	0	0	0	0	0	0	0	0	0	0	0	0	0	0	0	0	0	0	0	0	0	0
d__Bacteria	k__norank_d__Bacteria	p__SAR324_cladeMarine_group_B	c__norank_p__SAR324_cladeMarine_group_B	o__norank_p__SAR324_cladeMarine_group_B	f__norank_p__SAR324_cladeMarine_group_B	g__norank_p__SAR324_cladeMarine_group_B	s__unclassified_g__norank_p__SAR324_cladeMarine_group_B	ASV28906	0	0	0	0	0	0	0	0	0	0	0	0	0	0	0	0	0	0	0	0	0	0	0	0	0	0	0	0	0	0	0	0	0	1	0	0	0	0	0	0	0
d__Bacteria	k__norank_d__Bacteria	p__Actinobacteriota	c__Acidimicrobiia	o__Microtrichales	f__Microtrichaceae	g__Sva0996_marine_group	s__unclassified_g__Sva0996_marine_group	ASV7777	0	0	0	0	0	0	0	0	0	0	0	0	0	0	0	0	0	0	0	0	0	4	0	0	0	0	0	12	14	8	0	0	0	0	0	0	7	5	14	0	0
d__Bacteria	k__norank_d__Bacteria	p__Desulfobacterota	c__Desulfobacteria	o__Desulfobacterales	f__Desulfosarcinaceae	g__unclassified_f__Desulfosarcinaceae	s__unclassified_f__Desulfosarcinaceae	ASV17542	0	0	0	0	0	0	0	0	0	0	0	0	0	0	0	0	0	0	0	0	0	9	12	0	0	0	4	0	0	0	21	0	0	0	0	0	0	9	0	0	0
d__Bacteria	k__norank_d__Bacteria	p__Acidobacteriota	c__Vicinamibacteria	o__Subgroup_9	f__norank_o__Subgroup_9	g__norank_o__Subgroup_9	s__uncultured_Acidobacteria_bacterium_o__Subgroup_9	ASV2017	0	0	0	0	0	0	0	0	0	0	0	0	0	0	0	0	0	0	0	0	0	0	0	0	0	0	0	0	0	0	0	0	0	0	0	0	0	0	0	0	0
d__Bacteria	k__norank_d__Bacteria	p__Bacteroidota	c__Bacteroidia	o__Bacteroidales	f__unclassified_o__Bacteroidales	g__unclassified_o__Bacteroidales	s__unclassified_o__Bacteroidales	ASV23045	0	0	0	0	0	0	0	0	0	0	0	0	0	0	0	0	0	3	0	0	5	0	0	0	0	0	0	0	0	0	0	0	0	0	0	0	0	0	0	0	0
d__Bacteria	k__norank_d__Bacteria	p__Sumerlaeota	c__Sumerlaeia	o__Sumerlaeales	f__Sumerlaeaceae	g__Sumerlaea	s__unclassified_g__Sumerlaea	ASV83666	0	0	0	0	0	0	0	0	0	0	0	0	0	0	0	0	0	0	0	0	0	0	0	0	0	0	0	0	0	0	2	0	0	0	0	0	0	0	0	0	0
d__Bacteria	k__norank_d__Bacteria	p__unclassified_k__norank_d__Bacteria	c__unclassified_k__norank_d__Bacteria	o__unclassified_k__norank_d__Bacteria	f__unclassified_k__norank_d__Bacteria	g__unclassified_k__norank_d__Bacteria	s__unclassified_k__norank_d__Bacteria	ASV100123	0	0	0	0	0	0	0	0	0	0	0	0	0	0	0	0	3	0	0	0	0	0	0	0	0	0	0	0	0	0	0	0	0	0	0	0	0	0	0	0	0
d__Bacteria	k__norank_d__Bacteria	p__Bdellovibrionota	c__Oligoflexia	o__0319-6G20	f__norank_o__0319-6G20	g__norank_o__0319-6G20	s__unclassified_g__norank_o__0319-6G20	ASV70861	0	0	0	0	0	0	0	0	0	0	2	0	0	0	0	0	0	0	0	0	0	0	0	0	0	0	0	0	0	0	0	0	0	0	0	0	0	0	0	0	0
d__Bacteria	k__norank_d__Bacteria	p__Proteobacteria	c__Alphaproteobacteria	o__Rhizobiales	f__Hyphomicrobiaceae	g__unclassified_f__Hyphomicrobiaceae	s__unclassified_f__Hyphomicrobiaceae	ASV23697	0	0	0	0	0	0	0	0	0	0	0	0	0	0	0	0	0	3	0	0	0	0	0	0	0	0	0	0	0	0	0	0	0	0	0	0	0	0	0	0	0
d__Bacteria	k__norank_d__Bacteria	p__Proteobacteria	c__Gammaproteobacteria	o__Oceanospirillales	f__Alcanivoracaceae	g__Ketobacter	s__uncultured_bacterium_g__Ketobacter	ASV55860	0	4	0	0	0	0	0	0	0	0	0	0	0	0	0	0	0	0	0	0	0	0	0	0	0	0	0	0	0	0	0	0	0	0	0	0	0	0	0	0	0
d__Bacteria	k__norank_d__Bacteria	p__Proteobacteria	c__Gammaproteobacteria	o__Oceanospirillales	f__Nitrincolaceae	g__Marinobacterium	s__Marinobacterium_zhoushanense	ASV17929	0	0	0	0	0	0	0	0	0	0	0	0	0	0	0	0	0	0	0	0	0	0	0	0	0	0	2	0	0	0	0	0	0	0	0	0	0	0	0	0	0
d__Bacteria	k__norank_d__Bacteria	p__Actinobacteriota	c__Actinobacteria	o__unclassified_c__Actinobacteria	f__unclassified_c__Actinobacteria	g__unclassified_c__Actinobacteria	s__unclassified_c__Actinobacteria	ASV63240	0	0	0	0	0	0	0	0	0	0	0	0	0	0	0	0	0	0	0	0	0	0	0	0	0	0	0	0	0	0	0	0	0	0	0	1	0	0	0	0	0
d__Bacteria	k__norank_d__Bacteria	p__Myxococcota	c__Polyangia	o__Polyangiales	f__Polyangiaceae	g__unclassified_f__Polyangiaceae	s__unclassified_f__Polyangiaceae	ASV52360	3	0	0	0	0	0	0	0	0	0	0	0	0	0	0	0	0	0	0	0	0	0	0	0	0	0	0	0	0	0	0	0	0	0	0	0	0	0	0	0	0
d__Bacteria	k__norank_d__Bacteria	p__Firmicutes	c__Clostridia	o__Peptostreptococcales-Tissierellales	f__Fusibacteraceae	g__Fusibacter	s__uncultured_bacterium_g__Fusibacter	ASV66825	0	0	2	0	0	0	0	0	0	0	0	0	0	0	0	0	0	0	0	0	0	0	0	0	0	0	0	0	0	0	0	0	0	0	0	0	0	0	0	0	0
d__Bacteria	k__norank_d__Bacteria	p__Chloroflexi	c__Anaerolineae	o__SBR1031	f__A4b	g__norank_f__A4b	s__uncultured_organism_f__A4b	ASV15308	0	9	4	0	0	0	8	4	0	0	0	0	0	0	0	0	0	0	0	0	2	0	0	0	0	0	0	0	0	0	0	0	0	0	0	0	0	0	0	0	0
d__Bacteria	k__norank_d__Bacteria	p__Actinobacteriota	c__Acidimicrobiia	o__Actinomarinales	f__norank_o__Actinomarinales	g__norank_o__Actinomarinales	s__unclassified_g__norank_o__Actinomarinales	ASV44636	0	0	0	0	0	0	2	0	0	0	0	0	0	0	0	0	0	0	0	0	0	0	0	0	0	0	0	0	0	0	0	0	0	0	0	0	0	0	0	0	0
d__Bacteria	k__norank_d__Bacteria	p__Proteobacteria	c__Gammaproteobacteria	o__unclassified_c__Gammaproteobacteria	f__unclassified_c__Gammaproteobacteria	g__unclassified_c__Gammaproteobacteria	s__unclassified_c__Gammaproteobacteria	ASV58825	0	0	0	0	0	0	0	0	0	0	0	0	0	0	0	0	0	0	0	0	0	0	0	0	0	0	0	0	0	0	0	0	1	0	0	0	0	0	0	0	0
d__Bacteria	k__norank_d__Bacteria	p__Proteobacteria	c__Gammaproteobacteria	o__Xanthomonadales	f__Xanthomonadaceae	g__Pseudoxanthomonas	s__metagenome_g__Pseudoxanthomonas	ASV77466	0	0	0	0	0	0	0	0	0	0	0	0	0	0	0	0	0	0	0	0	0	0	0	0	0	0	0	0	0	0	0	0	0	0	0	0	0	0	0	0	0
d__Bacteria	k__norank_d__Bacteria	p__MBNT15	c__norank_p__MBNT15	o__norank_p__MBNT15	f__norank_p__MBNT15	g__norank_p__MBNT15	s__unclassified_g__norank_p__MBNT15	ASV92054	0	0	0	0	0	0	0	0	0	0	0	0	0	0	0	0	0	0	0	0	2	0	0	0	0	0	0	0	0	0	0	0	0	0	0	0	0	0	0	0	0
d__Bacteria	k__norank_d__Bacteria	p__Proteobacteria	c__Gammaproteobacteria	o__unclassified_c__Gammaproteobacteria	f__unclassified_c__Gammaproteobacteria	g__unclassified_c__Gammaproteobacteria	s__unclassified_c__Gammaproteobacteria	ASV39141	0	0	0	0	0	0	0	0	0	0	0	0	0	0	0	0	0	0	1	0	0	0	0	0	0	0	0	0	0	0	0	0	0	0	0	0	0	0	0	0	0
d__Bacteria	k__norank_d__Bacteria	p__Chloroflexi	c__Anaerolineae	o__SBR1031	f__norank_o__SBR1031	g__norank_o__SBR1031	s__uncultured_bacterium_o__SBR1031	ASV65041	0	0	15	0	0	0	0	0	0	0	0	0	0	0	0	0	0	0	0	0	0	0	0	0	0	0	0	0	0	0	0	0	0	0	0	0	0	0	0	0	0
d__Bacteria	k__norank_d__Bacteria	p__Proteobacteria	c__Gammaproteobacteria	o__Steroidobacterales	f__Steroidobacteraceae	g__norank_f__Steroidobacteraceae	s__unclassified_g__norank_f__Steroidobacteraceae	ASV39607	0	0	0	0	0	0	0	0	0	0	0	0	0	0	0	0	0	0	1	0	0	0	0	0	0	0	0	0	0	0	0	0	0	0	0	0	0	0	0	0	0
d__Bacteria	k__norank_d__Bacteria	p__Gemmatimonadota	c__Gemmatimonadetes	o__Gemmatimonadales	f__Gemmatimonadaceae	g__norank_f__Gemmatimonadaceae	s__unclassified_g__norank_f__Gemmatimonadaceae	ASV15618	0	0	0	0	6	0	0	3	0	0	0	0	0	0	0	9	6	0	0	0	0	0	0	0	0	0	0	0	0	0	0	0	0	0	0	0	0	0	0	0	0
d__Bacteria	k__norank_d__Bacteria	p__Proteobacteria	c__Alphaproteobacteria	o__Rhizobiales	f__Devosiaceae	g__Maritalea	s__Maritalea_sp._ZJ6105	ASV35917	0	0	0	0	0	0	0	0	0	0	0	0	0	0	0	0	0	0	0	0	0	0	0	0	0	0	0	20	0	0	0	0	0	0	0	0	0	0	0	0	0
d__Bacteria	k__norank_d__Bacteria	p__Bacteroidota	c__Bacteroidia	o__Chitinophagales	f__Saprospiraceae	g__norank_f__Saprospiraceae	s__unclassified_g__norank_f__Saprospiraceae	ASV72793	0	0	0	0	0	0	0	0	0	0	0	0	0	0	0	0	0	0	0	0	0	0	0	9	4	4	0	0	0	0	0	0	0	0	0	0	0	0	0	0	0
d__Bacteria	k__norank_d__Bacteria	p__Proteobacteria	c__Alphaproteobacteria	o__Rhodobacterales	f__Rhodobacteraceae	g__unclassified_f__Rhodobacteraceae	s__unclassified_f__Rhodobacteraceae	ASV6711	0	0	0	0	0	0	0	0	0	0	0	0	0	0	1	0	0	0	0	0	0	0	0	0	0	0	0	0	0	0	0	0	0	0	0	0	0	0	0	0	0
d__Bacteria	k__norank_d__Bacteria	p__Planctomycetota	c__Phycisphaerae	o__Phycisphaerales	f__Phycisphaeraceae	g__CL500-3	s__unclassified_g__CL500-3	ASV60051	0	0	0	0	0	0	0	0	0	0	0	0	0	0	0	0	0	0	0	0	0	0	0	0	0	0	0	0	0	0	0	0	0	0	0	0	0	0	0	0	1
d__Bacteria	k__norank_d__Bacteria	p__Acidobacteriota	c__Thermoanaerobaculia	o__Thermoanaerobaculales	f__Thermoanaerobaculaceae	g__Subgroup_23	s__uncultured_bacterium_g__Subgroup_23	ASV73674	0	0	0	0	0	0	0	0	0	0	0	0	0	0	0	0	0	0	0	0	0	0	0	0	0	3	0	0	0	0	0	0	0	0	0	0	0	0	0	0	0
d__Bacteria	k__norank_d__Bacteria	p__Proteobacteria	c__Alphaproteobacteria	o__Rhodobacterales	f__Rhodobacteraceae	g__unclassified_f__Rhodobacteraceae	s__unclassified_f__Rhodobacteraceae	ASV5699	0	0	0	0	0	0	0	0	0	0	0	0	0	0	3	0	0	0	0	0	0	0	0	0	0	0	0	0	0	0	0	0	0	0	0	0	0	0	0	0	0
d__Bacteria	k__norank_d__Bacteria	p__Cyanobacteria	c__Cyanobacteriia	o__Cyanobacteriales	f__Microcystaceae	g__unclassified_f__Microcystaceae	s__unclassified_f__Microcystaceae	ASV76442	0	0	0	0	0	0	0	0	0	0	0	0	0	0	0	0	0	0	0	0	0	0	0	0	0	0	0	0	0	0	0	0	0	0	0	0	0	0	0	2	0
d__Bacteria	k__norank_d__Bacteria	p__Proteobacteria	c__Gammaproteobacteria	o__EPR3968-O8a-Bc78	f__norank_o__EPR3968-O8a-Bc78	g__norank_o__EPR3968-O8a-Bc78	s__uncultured_bacterium_o__EPR3968-O8a-Bc78	ASV67295	0	0	0	0	0	0	0	0	0	0	0	0	0	0	0	10	0	0	0	0	0	0	0	0	0	0	0	0	0	0	0	0	0	0	0	0	0	0	0	0	0
d__Bacteria	k__norank_d__Bacteria	p__Bacteroidota	c__Bacteroidia	o__Bacteroidales	f__Bacteroidetes_BD2-2	g__norank_f__Bacteroidetes_BD2-2	s__unclassified_g__norank_f__Bacteroidetes_BD2-2	ASV66476	0	0	2	0	0	0	0	0	0	0	0	0	0	0	0	0	0	0	0	0	0	0	0	0	0	0	0	0	0	0	0	0	0	0	0	0	0	0	0	0	0
d__Bacteria	k__norank_d__Bacteria	p__MBNT15	c__norank_p__MBNT15	o__norank_p__MBNT15	f__norank_p__MBNT15	g__norank_p__MBNT15	s__unclassified_g__norank_p__MBNT15	ASV58705	0	0	0	0	0	0	0	0	0	0	0	0	0	0	0	0	0	0	0	0	0	0	0	0	0	0	0	0	0	0	0	0	1	0	0	0	0	0	0	0	0
d__Bacteria	k__norank_d__Bacteria	p__Bacteroidota	c__Bacteroidia	o__Chitinophagales	f__Saprospiraceae	g__norank_f__Saprospiraceae	s__unclassified_g__norank_f__Saprospiraceae	ASV12500	0	0	0	0	0	0	0	0	0	0	0	0	3	0	0	0	8	7	25	65	2	0	0	0	0	0	0	0	0	0	0	0	0	0	0	0	0	0	0	1	0
d__Bacteria	k__norank_d__Bacteria	p__Chloroflexi	c__Anaerolineae	o__unclassified_c__Anaerolineae	f__unclassified_c__Anaerolineae	g__unclassified_c__Anaerolineae	s__unclassified_c__Anaerolineae	ASV63851	0	0	0	0	0	0	0	0	0	0	0	0	0	0	0	0	0	0	0	0	0	0	0	0	0	0	0	0	0	0	0	0	0	0	0	0	0	0	0	0	0
d__Bacteria	k__norank_d__Bacteria	p__Proteobacteria	c__Gammaproteobacteria	o__unclassified_c__Gammaproteobacteria	f__unclassified_c__Gammaproteobacteria	g__unclassified_c__Gammaproteobacteria	s__unclassified_c__Gammaproteobacteria	ASV35316	0	0	0	0	0	0	0	0	0	0	0	0	0	0	0	0	0	0	0	0	0	0	0	0	0	0	0	0	0	0	0	0	0	0	0	0	0	0	0	0	0
d__Bacteria	k__norank_d__Bacteria	p__Patescibacteria	c__Kazania	o__norank_c__Kazania	f__norank_c__Kazania	g__norank_c__Kazania	s__uncultured_bacterium_c__Kazania	ASV80375	0	0	0	0	0	0	0	0	0	0	0	0	0	0	0	0	0	0	0	0	0	0	0	0	0	0	0	0	0	3	0	0	0	0	0	0	0	0	0	0	0
d__Bacteria	k__norank_d__Bacteria	p__Proteobacteria	c__Gammaproteobacteria	o__Pseudomonadales	f__Moraxellaceae	g__Acinetobacter	s__unclassified_g__Acinetobacter	ASV97068	0	0	0	0	0	0	0	0	0	0	0	0	0	0	0	0	0	0	0	0	0	0	0	0	0	0	0	0	0	0	0	0	0	0	0	0	0	0	0	0	2
d__Bacteria	k__norank_d__Bacteria	p__Firmicutes	c__Clostridia	o__unclassified_c__Clostridia	f__unclassified_c__Clostridia	g__unclassified_c__Clostridia	s__unclassified_c__Clostridia	ASV97060	0	0	0	0	0	0	0	0	0	0	0	0	0	0	0	0	0	0	0	0	0	0	0	0	0	0	0	0	0	0	0	0	0	0	0	0	0	0	0	0	2
d__Bacteria	k__norank_d__Bacteria	p__unclassified_k__norank_d__Bacteria	c__unclassified_k__norank_d__Bacteria	o__unclassified_k__norank_d__Bacteria	f__unclassified_k__norank_d__Bacteria	g__unclassified_k__norank_d__Bacteria	s__unclassified_k__norank_d__Bacteria	ASV13534	0	0	0	0	0	0	0	0	0	0	0	0	2	0	0	0	0	0	0	0	0	0	0	0	0	0	0	0	0	0	0	0	0	0	0	0	0	0	0	0	0
d__Bacteria	k__norank_d__Bacteria	p__Proteobacteria	c__Gammaproteobacteria	o__Legionellales	f__Legionellaceae	g__Legionella	s__unclassified_g__Legionella	ASV77636	0	0	0	0	0	0	0	0	0	0	0	0	0	0	0	0	0	0	0	0	0	0	0	0	0	0	0	0	0	0	0	0	0	0	0	0	0	0	0	0	0
d__Bacteria	k__norank_d__Bacteria	p__Proteobacteria	c__Gammaproteobacteria	o__Cellvibrionales	f__Microbulbiferaceae	g__Microbulbifer	s__unclassified_g__Microbulbifer	ASV56383	0	2	0	0	0	0	0	0	0	0	0	0	0	0	0	0	0	0	0	0	0	0	0	0	0	0	0	0	0	0	0	0	0	0	0	0	0	0	0	0	0
d__Bacteria	k__norank_d__Bacteria	p__Proteobacteria	c__Gammaproteobacteria	o__unclassified_c__Gammaproteobacteria	f__unclassified_c__Gammaproteobacteria	g__unclassified_c__Gammaproteobacteria	s__unclassified_c__Gammaproteobacteria	ASV69156	0	0	0	0	0	0	0	0	0	0	0	0	0	0	0	1	0	0	0	0	0	0	0	0	0	0	0	0	0	0	0	0	0	0	0	0	0	0	0	0	0
d__Bacteria	k__norank_d__Bacteria	p__Verrucomicrobiota	c__Verrucomicrobiae	o__Pedosphaerales	f__Pedosphaeraceae	g__norank_f__Pedosphaeraceae	s__unclassified_g__norank_f__Pedosphaeraceae	ASV37166	0	0	0	0	0	0	0	0	0	0	0	0	0	0	0	0	0	0	19	0	0	0	0	0	0	0	0	0	0	0	0	0	0	0	0	0	0	0	0	0	0
d__Bacteria	k__norank_d__Bacteria	p__unclassified_k__norank_d__Bacteria	c__unclassified_k__norank_d__Bacteria	o__unclassified_k__norank_d__Bacteria	f__unclassified_k__norank_d__Bacteria	g__unclassified_k__norank_d__Bacteria	s__unclassified_k__norank_d__Bacteria	ASV58121	0	0	0	0	0	0	0	0	0	0	0	0	0	0	0	0	0	0	0	0	0	0	0	0	0	0	0	0	0	0	0	0	2	0	0	0	0	0	0	0	0
d__Bacteria	k__norank_d__Bacteria	p__Bacteroidota	c__Ignavibacteria	o__Ignavibacteriales	f__Melioribacteraceae	g__IheB3-7	s__uncultured_Chlorobi_bacterium_g__IheB3-7	ASV69989	0	0	0	0	0	0	0	0	0	0	8	0	0	0	0	0	0	0	0	0	0	0	0	0	0	0	0	0	0	0	0	0	0	0	0	0	0	0	0	0	0
d__Bacteria	k__norank_d__Bacteria	p__Planctomycetota	c__Phycisphaerae	o__Phycisphaerales	f__Phycisphaeraceae	g__norank_f__Phycisphaeraceae	s__uncultured_bacterium_f__Phycisphaeraceae	ASV6339	0	0	0	0	0	0	0	0	0	0	0	0	0	0	1	0	0	0	0	0	0	0	0	0	0	0	0	0	0	0	0	0	0	0	0	0	0	0	0	0	0
d__Bacteria	k__norank_d__Bacteria	p__Verrucomicrobiota	c__Verrucomicrobiae	o__Verrucomicrobiales	f__Rubritaleaceae	g__Luteolibacter	s__unclassified_g__Luteolibacter	ASV17460	0	0	0	0	0	0	0	0	0	0	0	0	0	0	0	0	0	0	0	0	0	0	0	0	0	0	3	0	0	0	0	0	0	0	0	0	0	0	0	0	0
d__Bacteria	k__norank_d__Bacteria	p__Actinobacteriota	c__Thermoleophilia	o__Gaiellales	f__norank_o__Gaiellales	g__norank_o__Gaiellales	s__unclassified_g__norank_o__Gaiellales	ASV69138	0	0	0	0	0	0	0	0	0	0	0	0	0	0	0	2	0	0	0	0	0	0	0	0	0	0	0	0	0	0	0	0	0	0	0	0	0	0	0	0	0
d__Bacteria	k__norank_d__Bacteria	p__Bdellovibrionota	c__Oligoflexia	o__Silvanigrellales	f__Silvanigrellaceae	g__unclassified_f__Silvanigrellaceae	s__unclassified_f__Silvanigrellaceae	ASV32050	0	0	0	0	0	0	0	0	0	0	0	0	0	0	0	0	0	0	0	0	0	0	0	0	5	0	0	0	0	0	0	0	0	0	0	0	0	0	0	0	0
d__Bacteria	k__norank_d__Bacteria	p__Chloroflexi	c__Anaerolineae	o__Caldilineales	f__Caldilineaceae	g__norank_f__Caldilineaceae	s__uncultured_bacterium_f__Caldilineaceae	ASV12743	0	0	0	0	0	0	0	0	0	0	0	0	2	0	0	0	0	0	0	0	0	0	0	0	0	0	0	0	0	0	0	0	0	0	0	0	0	0	0	0	0
d__Bacteria	k__norank_d__Bacteria	p__Chloroflexi	c__Anaerolineae	o__norank_c__Anaerolineae	f__norank_c__Anaerolineae	g__norank_c__Anaerolineae	s__uncultured_bacterium_c__Anaerolineae	ASV43490	0	2	0	0	17	3	8	0	0	0	0	0	0	0	0	0	0	0	0	0	0	0	0	0	0	0	0	0	0	0	0	0	0	0	0	0	0	0	0	0	0
d__Bacteria	k__norank_d__Bacteria	p__unclassified_k__norank_d__Bacteria	c__unclassified_k__norank_d__Bacteria	o__unclassified_k__norank_d__Bacteria	f__unclassified_k__norank_d__Bacteria	g__unclassified_k__norank_d__Bacteria	s__unclassified_k__norank_d__Bacteria	ASV26161	0	0	0	0	0	0	0	0	0	0	0	0	0	0	0	0	0	0	0	0	0	4	0	0	0	0	0	0	0	0	0	0	0	0	0	0	0	0	0	0	0
d__Bacteria	k__norank_d__Bacteria	p__Acidobacteriota	c__Vicinamibacteria	o__Subgroup_17	f__norank_o__Subgroup_17	g__norank_o__Subgroup_17	s__unclassified_g__norank_o__Subgroup_17	ASV3706	0	0	0	0	0	0	0	0	0	7	0	0	0	0	9	0	0	0	0	0	0	0	0	0	0	0	0	0	0	0	0	0	0	0	0	0	0	0	0	0	0
d__Bacteria	k__norank_d__Bacteria	p__Desulfobacterota	c__Desulfobulbia	o__Desulfobulbales	f__Desulfocapsaceae	g__unclassified_f__Desulfocapsaceae	s__unclassified_f__Desulfocapsaceae	ASV17617	0	0	0	0	0	0	0	0	0	0	0	0	0	0	0	0	0	0	0	0	0	0	0	0	0	0	3	0	0	0	0	0	0	0	0	0	0	0	0	0	0
d__Bacteria	k__norank_d__Bacteria	p__Proteobacteria	c__Alphaproteobacteria	o__Rhodospirillales	f__Magnetospiraceae	g__norank_f__Magnetospiraceae	s__unclassified_g__norank_f__Magnetospiraceae	ASV15661	0	0	0	0	0	0	0	3	0	0	0	0	0	0	0	0	0	0	0	0	0	0	0	0	0	0	0	0	0	0	0	0	0	0	0	0	0	0	0	0	0
d__Bacteria	k__norank_d__Bacteria	p__Actinobacteriota	c__Acidimicrobiia	o__IMCC26256	f__norank_o__IMCC26256	g__norank_o__IMCC26256	s__bacterium_enrichment_culture_clone_auto73_4W	ASV13185	0	0	0	0	0	0	0	0	0	0	0	0	1	0	0	0	0	0	0	0	0	0	0	0	0	0	0	0	0	0	0	0	0	0	0	0	0	0	0	0	0
d__Bacteria	k__norank_d__Bacteria	p__Actinobacteriota	c__Actinobacteria	o__Micrococcales	f__Micrococcaceae	g__unclassified_f__Micrococcaceae	s__unclassified_f__Micrococcaceae	ASV60457	0	0	0	0	0	0	0	0	0	0	0	0	0	0	0	0	0	0	0	0	0	0	0	0	0	0	0	0	0	0	0	0	0	0	0	0	0	0	0	0	0
d__Bacteria	k__norank_d__Bacteria	p__Verrucomicrobiota	c__Verrucomicrobiae	o__Verrucomicrobiales	f__Rubritaleaceae	g__Roseibacillus	s__unclassified_g__Roseibacillus	ASV8219	0	0	0	0	0	0	0	0	0	0	0	0	0	0	0	0	0	0	0	0	0	0	0	0	0	0	7	0	8	6	0	0	0	0	0	0	0	0	0	0	0
d__Bacteria	k__norank_d__Bacteria	p__Chloroflexi	c__Anaerolineae	o__Anaerolineales	f__Anaerolineaceae	g__norank_f__Anaerolineaceae	s__unclassified_g__norank_f__Anaerolineaceae	ASV70977	0	0	0	0	0	0	0	0	0	0	2	0	0	0	0	0	0	0	0	0	0	0	0	0	0	0	0	0	0	0	0	0	0	0	0	0	0	0	0	0	0
d__Bacteria	k__norank_d__Bacteria	p__unclassified_k__norank_d__Bacteria	c__unclassified_k__norank_d__Bacteria	o__unclassified_k__norank_d__Bacteria	f__unclassified_k__norank_d__Bacteria	g__unclassified_k__norank_d__Bacteria	s__unclassified_k__norank_d__Bacteria	ASV55048	0	0	0	0	0	0	0	0	0	0	0	0	0	0	0	0	0	0	0	0	0	0	0	0	0	0	0	0	0	0	0	0	0	0	0	0	0	0	0	0	0
d__Bacteria	k__norank_d__Bacteria	p__Bacteroidota	c__Bacteroidia	o__Flavobacteriales	f__Flavobacteriaceae	g__unclassified_f__Flavobacteriaceae	s__unclassified_f__Flavobacteriaceae	ASV13739	0	0	0	0	0	0	0	0	0	0	0	0	2	0	0	0	0	0	0	0	0	0	0	0	0	0	0	0	0	0	0	0	0	0	0	0	0	0	0	0	0
d__Bacteria	k__norank_d__Bacteria	p__Chloroflexi	c__Dehalococcoidia	o__GIF9	f__norank_o__GIF9	g__norank_o__GIF9	s__uncultured_bacterium_o__GIF9	ASV54842	0	0	0	0	0	0	0	0	0	0	0	0	0	0	0	0	0	0	0	0	0	0	0	0	0	0	0	0	0	0	0	0	0	0	0	0	0	0	0	0	0
d__Bacteria	k__norank_d__Bacteria	p__unclassified_k__norank_d__Bacteria	c__unclassified_k__norank_d__Bacteria	o__unclassified_k__norank_d__Bacteria	f__unclassified_k__norank_d__Bacteria	g__unclassified_k__norank_d__Bacteria	s__unclassified_k__norank_d__Bacteria	ASV2559	0	0	0	0	0	0	0	0	0	0	0	0	0	0	0	0	0	0	0	0	0	0	0	0	0	0	0	0	0	0	0	0	0	0	0	0	0	0	0	0	0
d__Bacteria	k__norank_d__Bacteria	p__Cyanobacteria	c__Cyanobacteriia	o__Synechococcales	f__Cyanobiaceae	g__Cyanobium_PCC-6307	s__unclassified_g__Cyanobium_PCC-6307	ASV33617	0	0	0	0	0	0	0	0	0	0	0	0	0	0	0	0	0	0	0	0	0	0	0	0	0	0	0	0	0	0	0	0	0	0	0	0	0	0	0	0	0
d__Bacteria	k__norank_d__Bacteria	p__Firmicutes	c__Clostridia	o__Peptostreptococcales-Tissierellales	f__norank_o__Peptostreptococcales-Tissierellales	g__Brassicibacter	s__uncultured_bacterium_g__Brassicibacter	ASV4351	0	0	0	0	0	0	0	0	0	0	0	0	0	0	3	0	0	0	0	0	0	0	0	0	0	0	0	0	0	0	0	0	0	0	0	0	0	0	0	0	0
d__Bacteria	k__norank_d__Bacteria	p__Proteobacteria	c__Alphaproteobacteria	o__Rhodobacterales	f__Rhodobacteraceae	g__unclassified_f__Rhodobacteraceae	s__unclassified_f__Rhodobacteraceae	ASV13337	0	0	0	0	0	0	0	0	0	0	0	0	2	0	0	0	0	0	0	0	0	0	0	0	0	0	0	0	0	0	0	0	0	0	0	0	0	0	0	0	0
d__Bacteria	k__norank_d__Bacteria	p__Bacteroidota	c__Bacteroidia	o__unclassified_c__Bacteroidia	f__unclassified_c__Bacteroidia	g__unclassified_c__Bacteroidia	s__unclassified_c__Bacteroidia	ASV17719	0	0	0	0	0	0	0	0	0	0	0	0	0	0	0	0	0	0	0	0	0	0	0	0	5	0	2	0	0	0	0	0	0	0	0	0	0	0	0	0	0
d__Bacteria	k__norank_d__Bacteria	p__Proteobacteria	c__Alphaproteobacteria	o__unclassified_c__Alphaproteobacteria	f__unclassified_c__Alphaproteobacteria	g__unclassified_c__Alphaproteobacteria	s__unclassified_c__Alphaproteobacteria	ASV53403	2	0	0	0	0	0	0	0	0	0	0	0	0	0	0	0	0	0	0	0	0	0	0	0	0	0	0	0	0	0	0	0	0	0	0	0	0	0	0	0	0
d__Bacteria	k__norank_d__Bacteria	p__Verrucomicrobiota	c__Kiritimatiellae	o__WCHB1-41	f__norank_o__WCHB1-41	g__norank_o__WCHB1-41	s__uncultured_Kiritimatiellaeota_bacterium	ASV39069	0	0	0	0	0	0	0	0	0	0	0	0	0	0	0	0	0	0	2	0	0	0	0	0	0	0	0	0	0	0	0	0	0	0	0	0	0	0	0	0	0
d__Bacteria	k__norank_d__Bacteria	p__Proteobacteria	c__Gammaproteobacteria	o__unclassified_c__Gammaproteobacteria	f__unclassified_c__Gammaproteobacteria	g__unclassified_c__Gammaproteobacteria	s__unclassified_c__Gammaproteobacteria	ASV84446	0	0	0	0	0	0	0	0	0	0	0	0	0	0	0	0	0	0	0	0	0	0	0	0	0	0	0	0	0	0	1	0	0	0	0	0	0	0	0	0	0
d__Bacteria	k__norank_d__Bacteria	p__Bacteroidota	c__Bacteroidia	o__Cytophagales	f__Cyclobacteriaceae	g__Shivajiella	s__Shivajiella_indica	ASV38391	0	0	0	0	0	0	0	0	0	0	0	0	0	0	0	0	0	0	3	0	0	0	0	0	0	0	0	0	0	0	0	0	0	0	0	0	0	0	0	0	0
d__Bacteria	k__norank_d__Bacteria	p__Methylomirabilota	c__Methylomirabilia	o__Rokubacteriales	f__norank_o__Rokubacteriales	g__norank_o__Rokubacteriales	s__uncultured_Firmicutes_bacterium_o__Rokubacteriales	ASV28216	0	0	0	0	0	0	0	0	0	0	0	0	0	0	0	0	0	0	0	0	0	0	0	0	0	0	0	0	0	0	0	0	0	2	0	0	0	0	0	0	0
d__Bacteria	k__norank_d__Bacteria	p__Desulfobacterota	c__Desulfobulbia	o__Desulfobulbales	f__Desulfobulbaceae	g__norank_f__Desulfobulbaceae	s__unclassified_g__norank_f__Desulfobulbaceae	ASV48402	0	0	0	0	0	0	0	0	2	0	0	0	0	0	0	0	0	0	0	0	0	0	0	0	0	0	0	0	0	0	0	0	0	0	0	0	0	0	0	0	0
d__Bacteria	k__norank_d__Bacteria	p__Bacteroidota	c__Bacteroidia	o__Chitinophagales	f__Saprospiraceae	g__norank_f__Saprospiraceae	s__unclassified_g__norank_f__Saprospiraceae	ASV28659	0	0	0	0	0	0	0	0	0	0	0	0	0	0	0	0	0	0	0	0	0	0	0	0	0	0	0	0	0	0	0	0	0	1	0	0	0	0	0	0	0
d__Bacteria	k__norank_d__Bacteria	p__Bacteroidota	c__Bacteroidia	o__unclassified_c__Bacteroidia	f__unclassified_c__Bacteroidia	g__unclassified_c__Bacteroidia	s__unclassified_c__Bacteroidia	ASV23579	0	0	0	0	0	0	0	0	0	0	0	0	0	0	0	0	0	3	0	0	0	0	0	0	0	0	0	0	0	0	0	0	0	0	0	0	0	0	0	0	0
d__Bacteria	k__norank_d__Bacteria	p__Actinobacteriota	c__Actinobacteria	o__Micrococcales	f__Intrasporangiaceae	g__unclassified_f__Intrasporangiaceae	s__unclassified_f__Intrasporangiaceae	ASV78448	0	0	0	0	0	0	0	0	0	0	0	0	0	0	0	0	0	0	0	0	0	0	0	0	0	0	0	0	0	0	0	3	0	0	0	0	0	0	0	0	0
d__Bacteria	k__norank_d__Bacteria	p__Acidobacteriota	c__Vicinamibacteria	o__Subgroup_17	f__norank_o__Subgroup_17	g__norank_o__Subgroup_17	s__uncultured_bacterium_o__Subgroup_17	ASV48910	0	0	0	0	0	0	0	0	0	11	0	0	0	0	0	0	0	0	0	0	0	0	0	0	0	0	0	0	0	0	0	0	0	0	0	0	0	0	0	0	0
d__Bacteria	k__norank_d__Bacteria	p__Actinobacteriota	c__Actinobacteria	o__Propionibacteriales	f__Propionibacteriaceae	g__unclassified_f__Propionibacteriaceae	s__unclassified_f__Propionibacteriaceae	ASV75867	0	0	0	0	0	0	0	0	0	0	0	0	0	0	0	0	0	0	0	0	0	0	0	0	0	0	0	0	0	0	0	0	0	0	0	0	0	0	0	2	0
d__Bacteria	k__norank_d__Bacteria	p__Desulfobacterota	c__Desulfobacteria	o__Desulfobacterales	f__Desulfosarcinaceae	g__Desulfatitalea	s__uncultured_delta_proteobacterium_g__Desulfatitalea	ASV47470	0	0	0	0	0	12	0	0	11	0	0	0	0	0	0	0	0	0	0	0	0	0	0	0	0	0	0	0	0	0	0	0	0	0	0	0	0	0	0	0	0
d__Bacteria	k__norank_d__Bacteria	p__Bacteroidota	c__Ignavibacteria	o__Ignavibacteriales	f__PHOS-HE36	g__norank_f__PHOS-HE36	s__unclassified_g__norank_f__PHOS-HE36	ASV90161	0	0	0	0	0	0	0	0	0	0	0	0	0	0	0	0	0	0	0	0	6	0	0	0	0	0	0	0	0	0	0	0	0	0	0	0	0	0	0	0	0
d__Bacteria	k__norank_d__Bacteria	p__Desulfobacterota	c__Desulfobacteria	o__Desulfatiglandales	f__Desulfatiglandaceae	g__Desulfatiglans	s__unclassified_g__Desulfatiglans	ASV60785	0	0	0	0	0	0	0	0	0	0	0	0	0	12	0	0	0	0	0	0	0	0	0	0	0	0	0	0	0	0	0	0	0	0	0	0	0	0	0	0	0
d__Bacteria	k__norank_d__Bacteria	p__unclassified_k__norank_d__Bacteria	c__unclassified_k__norank_d__Bacteria	o__unclassified_k__norank_d__Bacteria	f__unclassified_k__norank_d__Bacteria	g__unclassified_k__norank_d__Bacteria	s__unclassified_k__norank_d__Bacteria	ASV87785	0	0	0	0	0	0	0	0	0	0	0	0	0	0	0	0	0	0	0	0	0	0	0	2	0	0	0	0	0	0	0	0	0	0	0	0	0	0	0	0	0
d__Bacteria	k__norank_d__Bacteria	p__Proteobacteria	c__Alphaproteobacteria	o__Rhodobacterales	f__Rhodobacteraceae	g__unclassified_f__Rhodobacteraceae	s__unclassified_f__Rhodobacteraceae	ASV7860	0	0	0	0	0	0	0	0	0	0	0	0	0	0	0	0	0	0	0	0	0	0	0	0	0	0	0	0	11	0	0	0	0	0	0	0	0	0	0	0	0
d__Bacteria	k__norank_d__Bacteria	p__Proteobacteria	c__Gammaproteobacteria	o__unclassified_c__Gammaproteobacteria	f__unclassified_c__Gammaproteobacteria	g__unclassified_c__Gammaproteobacteria	s__unclassified_c__Gammaproteobacteria	ASV46439	0	0	0	2	0	0	0	0	0	0	0	0	0	0	0	0	0	0	0	0	0	0	0	0	0	0	0	0	0	0	0	0	0	0	0	0	0	0	0	0	0
d__Bacteria	k__norank_d__Bacteria	p__Desulfobacterota	c__Desulfobulbia	o__Desulfobulbales	f__Desulfobulbaceae	g__norank_f__Desulfobulbaceae	s__unclassified_g__norank_f__Desulfobulbaceae	ASV86862	0	0	0	0	0	0	0	0	0	0	0	0	0	0	0	0	0	0	0	0	0	0	0	4	0	0	0	0	0	0	0	0	0	0	0	0	0	0	0	0	0
d__Bacteria	k__norank_d__Bacteria	p__Chloroflexi	c__Anaerolineae	o__Anaerolineales	f__Anaerolineaceae	g__norank_f__Anaerolineaceae	s__unclassified_g__norank_f__Anaerolineaceae	ASV17416	0	0	0	0	0	0	0	0	0	0	0	0	0	0	0	0	0	0	0	0	0	0	0	0	0	0	6	0	0	0	0	0	0	0	0	0	0	0	0	0	0
d__Bacteria	k__norank_d__Bacteria	p__unclassified_k__norank_d__Bacteria	c__unclassified_k__norank_d__Bacteria	o__unclassified_k__norank_d__Bacteria	f__unclassified_k__norank_d__Bacteria	g__unclassified_k__norank_d__Bacteria	s__unclassified_k__norank_d__Bacteria	ASV71515	0	0	0	0	0	0	0	0	0	0	2	0	0	0	0	0	0	0	0	0	0	0	0	0	0	0	0	0	0	0	0	0	0	0	0	0	0	0	0	0	0
d__Bacteria	k__norank_d__Bacteria	p__Desulfobacterota	c__Desulfobulbia	o__Desulfobulbales	f__Desulfobulbaceae	g__unclassified_f__Desulfobulbaceae	s__unclassified_f__Desulfobulbaceae	ASV45045	0	0	0	8	0	0	0	0	0	0	0	0	0	0	0	0	0	0	0	0	0	0	0	0	0	0	0	0	0	0	0	0	0	0	0	0	0	0	0	0	0
d__Bacteria	k__norank_d__Bacteria	p__Bacteroidota	c__Bacteroidia	o__Chitinophagales	f__Saprospiraceae	g__unclassified_f__Saprospiraceae	s__unclassified_f__Saprospiraceae	ASV22049	0	0	0	0	0	0	0	0	0	0	0	0	0	0	0	7	0	7	0	0	0	0	0	0	0	0	0	0	0	0	0	0	0	0	0	0	0	0	0	0	0
d__Bacteria	k__norank_d__Bacteria	p__Spirochaetota	c__Spirochaetia	o__Spirochaetales	f__Spirochaetaceae	g__GWE2-31-10	s__uncultured_bacterium_g__GWE2-31-10	ASV48165	0	0	0	0	0	0	0	0	2	0	0	0	0	0	0	0	0	0	0	0	0	0	0	0	0	0	0	0	0	0	0	0	0	0	0	0	0	0	0	0	0
d__Bacteria	k__norank_d__Bacteria	p__Actinobacteriota	c__Acidimicrobiia	o__Microtrichales	f__Microtrichaceae	g__Sva0996_marine_group	s__unclassified_g__Sva0996_marine_group	ASV10417	0	0	0	0	0	0	0	0	0	0	0	0	0	0	0	0	0	0	0	0	0	0	0	0	0	0	0	0	1	0	0	0	0	0	0	0	0	0	0	0	0
d__Bacteria	k__norank_d__Bacteria	p__Proteobacteria	c__Alphaproteobacteria	o__Rhodobacterales	f__Rhodobacteraceae	g__unclassified_f__Rhodobacteraceae	s__unclassified_f__Rhodobacteraceae	ASV78042	0	0	0	0	0	0	0	0	0	0	0	0	0	0	0	0	0	0	0	0	0	0	0	0	0	0	0	0	0	0	0	8	0	0	0	0	0	0	0	0	0
d__Bacteria	k__norank_d__Bacteria	p__Chloroflexi	c__Ktedonobacteria	o__Ktedonobacterales	f__JG30-KF-AS9	g__norank_f__JG30-KF-AS9	s__uncultured_bacterium_f__JG30-KF-AS9	ASV975	0	0	0	0	0	0	0	0	0	0	0	0	0	0	0	0	0	0	0	0	0	0	0	0	0	0	0	0	0	0	0	0	0	0	0	0	0	0	0	0	0
d__Bacteria	k__norank_d__Bacteria	p__Chloroflexi	c__Anaerolineae	o__SBR1031	f__norank_o__SBR1031	g__norank_o__SBR1031	s__unclassified_g__norank_o__SBR1031	ASV84985	0	0	0	0	0	0	0	0	0	0	0	0	0	0	0	0	0	0	0	0	0	0	0	0	0	0	0	0	0	0	0	0	0	0	0	0	0	0	0	0	0
d__Bacteria	k__norank_d__Bacteria	p__Chloroflexi	c__KD4-96	o__norank_c__KD4-96	f__norank_c__KD4-96	g__norank_c__KD4-96	s__uncultured_Chloroflexi_bacterium_c__KD4-96	ASV32603	0	0	0	0	0	0	0	0	0	0	0	0	0	0	0	0	0	0	0	0	0	0	0	0	0	0	0	0	0	0	0	0	0	0	0	0	0	0	0	0	0
d__Bacteria	k__norank_d__Bacteria	p__Actinobacteriota	c__Actinobacteria	o__Streptosporangiales	f__Streptosporangiaceae	g__unclassified_f__Streptosporangiaceae	s__unclassified_f__Streptosporangiaceae	ASV23070	0	0	0	0	0	0	0	0	0	0	0	0	0	0	0	0	0	3	0	0	0	0	0	0	0	0	0	0	0	0	0	0	0	0	0	0	0	0	0	0	0
d__Bacteria	k__norank_d__Bacteria	p__Bacteroidota	c__Bacteroidia	o__Chitinophagales	f__Saprospiraceae	g__norank_f__Saprospiraceae	s__unclassified_g__norank_f__Saprospiraceae	ASV28750	0	0	0	0	0	0	0	0	0	0	0	0	0	0	0	0	0	0	0	0	0	0	0	0	0	0	0	0	0	0	0	0	0	1	0	0	0	0	0	0	0
d__Bacteria	k__norank_d__Bacteria	p__Proteobacteria	c__Alphaproteobacteria	o__Rhizobiales	f__unclassified_o__Rhizobiales	g__unclassified_o__Rhizobiales	s__unclassified_o__Rhizobiales	ASV96489	0	0	0	0	0	0	0	0	0	0	0	0	0	0	0	0	0	0	0	0	0	0	0	0	0	0	0	0	0	0	0	0	0	0	0	0	0	0	0	0	3
d__Bacteria	k__norank_d__Bacteria	p__Chloroflexi	c__Anaerolineae	o__SBR1031	f__norank_o__SBR1031	g__norank_o__SBR1031	s__uncultured_bacterium_o__SBR1031	ASV57892	0	0	0	0	0	0	0	0	0	0	0	0	0	0	0	0	0	0	0	0	0	0	0	0	0	0	0	0	0	0	0	0	2	0	0	0	0	0	0	0	0
d__Bacteria	k__norank_d__Bacteria	p__Proteobacteria	c__Gammaproteobacteria	o__Cellvibrionales	f__Porticoccaceae	g__unclassified_f__Porticoccaceae	s__unclassified_f__Porticoccaceae	ASV25574	0	0	0	0	0	0	0	0	0	0	0	0	0	0	0	0	0	0	0	0	0	5	7	19	0	0	0	0	0	0	0	0	0	0	0	0	0	0	0	0	0
d__Bacteria	k__norank_d__Bacteria	p__Proteobacteria	c__Gammaproteobacteria	o__Pseudomonadales	f__Moraxellaceae	g__Acinetobacter	s__unclassified_g__Acinetobacter	ASV64349	0	0	0	0	0	0	0	0	0	0	0	0	0	0	0	0	0	0	0	0	0	0	0	0	0	0	0	0	0	0	0	0	0	0	0	0	0	0	0	0	0
d__Bacteria	k__norank_d__Bacteria	p__Proteobacteria	c__Alphaproteobacteria	o__Rhizobiales	f__Hyphomicrobiaceae	g__unclassified_f__Hyphomicrobiaceae	s__unclassified_f__Hyphomicrobiaceae	ASV65957	0	0	3	0	0	0	0	0	0	0	0	0	0	0	0	0	0	0	0	0	0	0	0	0	0	0	0	0	0	0	0	0	0	0	0	0	0	0	0	0	0
d__Bacteria	k__norank_d__Bacteria	p__SAR324_cladeMarine_group_B	c__norank_p__SAR324_cladeMarine_group_B	o__norank_p__SAR324_cladeMarine_group_B	f__norank_p__SAR324_cladeMarine_group_B	g__norank_p__SAR324_cladeMarine_group_B	s__uncultured_bacterium_zdt-33i5	ASV2155	0	0	0	0	0	0	0	0	0	0	0	0	0	0	0	0	0	0	0	0	3	0	0	0	0	0	0	0	0	0	0	0	0	0	0	0	0	0	0	0	0
d__Bacteria	k__norank_d__Bacteria	p__Acidobacteriota	c__Vicinamibacteria	o__Vicinamibacterales	f__norank_o__Vicinamibacterales	g__norank_o__Vicinamibacterales	s__unclassified_g__norank_o__Vicinamibacterales	ASV25104	0	7	0	0	0	0	0	0	0	0	0	0	0	0	0	0	0	2	0	0	0	0	0	0	0	0	0	0	0	0	0	0	0	0	0	0	0	0	0	0	0
d__Bacteria	k__norank_d__Bacteria	p__Acidobacteriota	c__Subgroup_22	o__norank_c__Subgroup_22	f__norank_c__Subgroup_22	g__norank_c__Subgroup_22	s__uncultured_bacterium_c__Subgroup_22	ASV6965	0	0	0	0	0	0	0	0	0	0	0	0	0	0	1	0	0	0	0	0	0	0	0	0	0	0	0	0	0	0	0	0	0	0	0	0	0	0	0	0	0
d__Bacteria	k__norank_d__Bacteria	p__Firmicutes	c__Bacilli	o__Exiguobacterales	f__Exiguobacteraceae	g__Exiguobacterium	s__unclassified_g__Exiguobacterium	ASV89693	0	0	0	0	0	0	0	0	0	0	0	0	0	0	0	0	0	0	0	0	0	0	0	0	0	0	0	0	0	0	0	0	0	0	0	0	0	0	0	0	0
d__Bacteria	k__norank_d__Bacteria	p__unclassified_k__norank_d__Bacteria	c__unclassified_k__norank_d__Bacteria	o__unclassified_k__norank_d__Bacteria	f__unclassified_k__norank_d__Bacteria	g__unclassified_k__norank_d__Bacteria	s__unclassified_k__norank_d__Bacteria	ASV12699	0	0	0	0	0	0	0	0	0	0	0	0	2	0	0	0	0	0	0	0	0	0	0	0	0	0	0	0	0	0	0	0	0	0	0	0	0	0	0	0	0
d__Bacteria	k__norank_d__Bacteria	p__unclassified_k__norank_d__Bacteria	c__unclassified_k__norank_d__Bacteria	o__unclassified_k__norank_d__Bacteria	f__unclassified_k__norank_d__Bacteria	g__unclassified_k__norank_d__Bacteria	s__unclassified_k__norank_d__Bacteria	ASV27257	0	0	0	0	0	0	0	0	0	0	0	0	0	0	0	0	0	0	0	0	0	2	0	0	0	0	0	0	0	0	0	0	0	0	0	0	0	0	0	0	0
d__Bacteria	k__norank_d__Bacteria	p__Proteobacteria	c__Gammaproteobacteria	o__Gammaproteobacteria_Incertae_Sedis	f__unclassified_o__Gammaproteobacteria_Incertae_Sedis	g__norank_f__unclassified_o__Gammaproteobacteria_Incertae_Sedis	s__unclassified_g__norank_f__unclassified_o__Gammaproteobacteria_Incertae_Sedis	ASV67390	0	0	0	0	0	0	0	0	0	0	0	0	0	0	0	6	0	0	0	0	0	0	0	0	0	0	0	0	0	0	0	0	0	0	0	0	0	0	0	0	0
d__Bacteria	k__norank_d__Bacteria	p__Proteobacteria	c__Gammaproteobacteria	o__Cellvibrionales	f__Halieaceae	g__unclassified_f__Halieaceae	s__unclassified_f__Halieaceae	ASV72301	0	0	0	0	0	0	0	0	0	0	1	0	0	0	0	0	0	0	0	0	0	0	0	0	0	0	0	0	0	0	0	0	0	0	0	0	0	0	0	0	0
d__Bacteria	k__norank_d__Bacteria	p__Proteobacteria	c__Alphaproteobacteria	o__Kiloniellales	f__Kiloniellaceae	g__Pelagibius	s__unclassified_g__Pelagibius	ASV7521	0	0	0	0	0	0	0	0	0	0	0	3	0	0	0	0	0	0	0	0	0	0	0	0	0	0	0	0	26	24	0	0	0	0	0	0	0	0	0	0	0
d__Bacteria	k__norank_d__Bacteria	p__Firmicutes	c__Clostridia	o__Clostridiales	f__Clostridiaceae	g__Clostridium_sensu_stricto_1	s__unclassified_g__Clostridium_sensu_stricto_1	ASV27889	0	0	0	0	0	0	0	0	0	0	0	0	0	0	0	0	0	0	0	0	0	0	0	0	0	0	0	0	0	0	0	0	0	5	0	0	0	0	0	0	0
d__Bacteria	k__norank_d__Bacteria	p__Desulfobacterota	c__Desulfobacteria	o__Desulfobacterales	f__Desulfosarcinaceae	g__unclassified_f__Desulfosarcinaceae	s__unclassified_f__Desulfosarcinaceae	ASV43216	0	0	0	0	0	0	0	0	0	0	0	0	0	0	0	4	0	0	0	1	0	0	0	0	0	0	0	0	0	0	0	0	0	0	0	0	0	0	0	0	0
d__Bacteria	k__norank_d__Bacteria	p__Firmicutes	c__Bacilli	o__Alicyclobacillales	f__Alicyclobacillaceae	g__Tumebacillus	s__unclassified_g__Tumebacillus	ASV55422	0	0	0	0	0	0	0	0	0	0	0	0	0	0	0	0	0	0	0	0	0	0	0	0	0	0	0	0	0	0	0	0	0	0	0	0	0	0	0	0	0
d__Bacteria	k__norank_d__Bacteria	p__Patescibacteria	c__ABY1	o__Candidatus_Falkowbacteria	f__norank_o__Candidatus_Falkowbacteria	g__norank_o__Candidatus_Falkowbacteria	s__uncultured_bacterium_o__Candidatus_Falkowbacteria	ASV27834	0	0	0	0	0	0	0	0	0	0	0	0	0	0	0	0	0	0	0	0	0	0	0	0	0	0	0	0	0	0	0	0	0	5	0	0	0	0	0	0	0
d__Bacteria	k__norank_d__Bacteria	p__unclassified_k__norank_d__Bacteria	c__unclassified_k__norank_d__Bacteria	o__unclassified_k__norank_d__Bacteria	f__unclassified_k__norank_d__Bacteria	g__unclassified_k__norank_d__Bacteria	s__unclassified_k__norank_d__Bacteria	ASV88686	0	0	0	0	0	0	0	0	0	0	0	0	0	0	0	0	0	0	0	0	0	0	0	0	0	0	0	0	0	0	0	0	0	0	0	0	0	0	0	0	0
d__Bacteria	k__norank_d__Bacteria	p__Bacteroidota	c__Bacteroidia	o__Bacteroidales	f__Prolixibacteraceae	g__Mangrovibacterium	s__uncultured_bacterium_g__Mangrovibacterium	ASV43207	0	0	0	0	0	0	0	0	0	0	0	0	0	0	0	0	0	0	0	1	0	0	0	0	0	0	0	0	0	0	0	0	0	0	0	0	0	0	0	0	0
d__Bacteria	k__norank_d__Bacteria	p__Chloroflexi	c__KD4-96	o__norank_c__KD4-96	f__norank_c__KD4-96	g__norank_c__KD4-96	s__unclassified_g__norank_c__KD4-96	ASV2979	0	0	0	0	0	0	7	0	0	71	12	30	22	61	22	8	8	23	94	0	29	0	0	0	0	0	0	0	0	0	0	0	0	0	0	0	0	0	0	30	38
d__Bacteria	k__norank_d__Bacteria	p__Firmicutes	c__Bacilli	o__Exiguobacterales	f__Exiguobacteraceae	g__Exiguobacterium	s__unclassified_g__Exiguobacterium	ASV88719	0	0	0	0	0	0	0	0	0	0	0	0	0	0	0	0	0	0	0	0	0	0	0	0	0	0	0	0	0	0	0	0	0	0	0	0	0	0	0	0	0
d__Bacteria	k__norank_d__Bacteria	p__Proteobacteria	c__Gammaproteobacteria	o__Steroidobacterales	f__Woeseiaceae	g__Woeseia	s__unclassified_g__Woeseia	ASV67142	0	0	0	0	0	0	0	0	0	0	0	0	0	0	0	23	27	0	0	0	0	0	0	0	0	0	0	0	0	0	0	0	0	0	0	0	0	0	0	0	0
d__Bacteria	k__norank_d__Bacteria	p__Firmicutes	c__Clostridia	o__Clostridiales	f__Clostridiaceae	g__Clostridium_sensu_stricto_18	s__unclassified_g__Clostridium_sensu_stricto_18	ASV1219	0	0	0	23	0	0	0	0	0	11	0	10	0	0	0	0	0	0	0	0	0	0	0	0	0	0	0	0	0	0	0	0	0	0	0	0	0	0	0	12	0
d__Bacteria	k__norank_d__Bacteria	p__Proteobacteria	c__Gammaproteobacteria	o__Burkholderiales	f__unclassified_o__Burkholderiales	g__unclassified_o__Burkholderiales	s__unclassified_o__Burkholderiales	ASV39143	0	0	0	0	0	0	0	0	0	0	0	0	0	0	0	0	0	0	2	0	0	0	0	0	0	0	0	0	0	0	0	0	0	0	0	0	0	0	0	0	0
d__Bacteria	k__norank_d__Bacteria	p__Desulfobacterota	c__norank_p__Desulfobacterota	o__norank_p__Desulfobacterota	f__norank_p__Desulfobacterota	g__norank_p__Desulfobacterota	s__uncultured_Dongia_sp.	ASV5016	0	0	0	0	0	0	0	0	0	0	0	0	0	0	2	0	0	0	0	0	0	0	0	0	0	0	0	0	0	0	0	0	0	0	0	0	0	0	0	0	0
d__Bacteria	k__norank_d__Bacteria	p__Proteobacteria	c__Alphaproteobacteria	o__Rhodobacterales	f__Rhodobacteraceae	g__Silicimonas	s__unclassified_g__Silicimonas	ASV2929	0	0	0	0	0	0	0	0	0	34	18	10	6	0	22	0	0	0	0	0	0	0	0	0	0	0	0	0	0	0	0	0	0	0	0	0	0	0	0	0	0
d__Bacteria	k__norank_d__Bacteria	p__unclassified_k__norank_d__Bacteria	c__unclassified_k__norank_d__Bacteria	o__unclassified_k__norank_d__Bacteria	f__unclassified_k__norank_d__Bacteria	g__unclassified_k__norank_d__Bacteria	s__unclassified_k__norank_d__Bacteria	ASV94765	0	0	0	0	0	0	0	0	0	0	0	0	0	0	0	0	0	0	0	0	0	0	0	0	0	0	0	0	0	0	0	0	0	0	0	0	0	0	0	0	0
d__Bacteria	k__norank_d__Bacteria	p__Campilobacterota	c__Campylobacteria	o__Campylobacterales	f__Sulfurovaceae	g__Sulfurovum	s__unclassified_g__Sulfurovum	ASV47599	0	0	0	0	0	0	0	0	7	0	0	0	0	0	0	0	0	0	0	0	0	0	0	0	0	0	0	0	0	0	0	0	0	0	0	0	0	0	0	0	0
d__Bacteria	k__norank_d__Bacteria	p__unclassified_k__norank_d__Bacteria	c__unclassified_k__norank_d__Bacteria	o__unclassified_k__norank_d__Bacteria	f__unclassified_k__norank_d__Bacteria	g__unclassified_k__norank_d__Bacteria	s__unclassified_k__norank_d__Bacteria	ASV91560	0	0	0	0	0	0	0	0	0	0	0	0	0	0	0	0	0	0	0	0	2	0	0	0	0	0	0	0	0	0	0	0	0	0	0	0	0	0	0	0	0
d__Bacteria	k__norank_d__Bacteria	p__Desulfobacterota	c__Desulfobulbia	o__Desulfobulbales	f__Desulfocapsaceae	g__unclassified_f__Desulfocapsaceae	s__unclassified_f__Desulfocapsaceae	ASV94786	0	0	0	0	0	0	0	0	0	0	0	0	0	0	0	0	0	0	0	0	0	0	0	0	0	0	0	0	0	0	0	0	0	0	0	0	0	0	0	0	0
d__Bacteria	k__norank_d__Bacteria	p__Modulibacteria	c__Moduliflexia	o__Moduliflexales	f__Moduliflexaceae	g__norank_f__Moduliflexaceae	s__uncultured_bacterium_f__Moduliflexaceae	ASV88423	0	0	0	0	0	0	0	0	0	0	0	0	0	0	0	0	0	0	0	0	0	0	0	1	0	0	0	0	0	0	0	0	0	0	0	0	0	0	0	0	0
d__Bacteria	k__norank_d__Bacteria	p__Actinobacteriota	c__Actinobacteria	o__unclassified_c__Actinobacteria	f__unclassified_c__Actinobacteria	g__unclassified_c__Actinobacteria	s__unclassified_c__Actinobacteria	ASV59762	0	0	0	0	0	0	0	0	0	0	0	0	0	0	0	0	0	0	0	0	0	0	0	0	0	0	0	0	0	0	0	0	0	0	0	0	0	0	0	0	0
d__Bacteria	k__norank_d__Bacteria	p__Verrucomicrobiota	c__Verrucomicrobiae	o__Verrucomicrobiales	f__DEV007	g__norank_f__DEV007	s__Verrucomicrobia_bacterium_PAORIC-16	ASV82909	0	0	0	0	0	0	0	0	0	0	0	0	0	0	0	0	0	0	0	0	0	0	0	0	0	0	0	0	0	0	0	0	0	0	0	0	0	0	1	0	0
d__Bacteria	k__norank_d__Bacteria	p__unclassified_k__norank_d__Bacteria	c__unclassified_k__norank_d__Bacteria	o__unclassified_k__norank_d__Bacteria	f__unclassified_k__norank_d__Bacteria	g__unclassified_k__norank_d__Bacteria	s__unclassified_k__norank_d__Bacteria	ASV18686	0	0	0	0	0	0	0	0	0	0	0	0	0	0	0	0	0	0	0	0	0	0	0	0	0	0	2	0	0	0	0	0	0	0	0	0	0	0	0	0	0
d__Bacteria	k__norank_d__Bacteria	p__Proteobacteria	c__Gammaproteobacteria	o__Cellvibrionales	f__Porticoccaceae	g__C1-B045	s__unclassified_g__C1-B045	ASV75046	0	0	0	0	0	2	0	0	0	0	0	0	0	0	0	0	0	0	0	0	0	0	0	0	0	0	0	0	0	0	0	0	0	0	0	0	0	0	0	0	0
d__Bacteria	k__norank_d__Bacteria	p__Desulfobacterota	c__Desulfobulbia	o__Desulfobulbales	f__Desulfocapsaceae	g__norank_f__Desulfocapsaceae	s__unclassified_g__norank_f__Desulfocapsaceae	ASV29368	0	0	0	0	0	0	0	0	0	0	0	0	0	0	0	0	0	0	0	0	0	0	5	0	0	0	0	0	0	0	0	0	0	0	0	0	0	0	0	0	0
d__Bacteria	k__norank_d__Bacteria	p__Planctomycetota	c__Planctomycetes	o__Gemmatales	f__Gemmataceae	g__norank_f__Gemmataceae	s__uncultured_bacterium_f__Gemmataceae	ASV14160	3	0	0	0	0	0	4	21	14	0	0	0	0	0	0	4	2	5	0	0	0	0	0	0	0	0	0	0	0	0	0	0	0	0	0	0	0	0	0	0	0
d__Bacteria	k__norank_d__Bacteria	p__Proteobacteria	c__Alphaproteobacteria	o__Thalassobaculales	f__Oceanibaculaceae	g__Oceanibaculum	s__uncultured_deep-sea_bacterium_g__Oceanibaculum	ASV23096	0	0	0	0	0	0	0	0	0	0	0	0	0	0	0	0	0	2	0	0	0	0	0	0	0	0	0	0	0	0	0	0	0	0	0	0	0	0	0	0	0
d__Bacteria	k__norank_d__Bacteria	p__Proteobacteria	c__Gammaproteobacteria	o__UBA10353_marine_group	f__norank_o__UBA10353_marine_group	g__norank_o__UBA10353_marine_group	s__unclassified_g__norank_o__UBA10353_marine_group	ASV82103	0	0	0	0	0	0	0	0	0	0	0	0	0	0	0	0	0	0	0	0	0	0	0	0	0	0	0	0	0	0	0	0	0	0	0	0	0	0	5	0	0
d__Bacteria	k__norank_d__Bacteria	p__Proteobacteria	c__Gammaproteobacteria	o__unclassified_c__Gammaproteobacteria	f__unclassified_c__Gammaproteobacteria	g__unclassified_c__Gammaproteobacteria	s__unclassified_c__Gammaproteobacteria	ASV95683	0	0	0	0	0	0	0	0	0	0	0	0	0	0	0	0	0	0	0	0	0	0	0	0	0	0	0	0	0	0	0	0	0	0	0	0	0	0	0	0	0
d__Bacteria	k__norank_d__Bacteria	p__Planctomycetota	c__OM190	o__norank_c__OM190	f__norank_c__OM190	g__norank_c__OM190	s__unclassified_g__norank_c__OM190	ASV26005	0	0	0	0	0	0	0	0	0	0	0	0	0	0	0	0	0	0	0	0	0	4	0	0	0	0	0	0	0	0	0	0	0	0	0	0	0	0	0	0	0
d__Bacteria	k__norank_d__Bacteria	p__unclassified_k__norank_d__Bacteria	c__unclassified_k__norank_d__Bacteria	o__unclassified_k__norank_d__Bacteria	f__unclassified_k__norank_d__Bacteria	g__unclassified_k__norank_d__Bacteria	s__unclassified_k__norank_d__Bacteria	ASV80126	0	0	0	0	0	0	0	0	0	0	0	0	0	0	0	0	0	0	0	0	0	0	0	0	0	0	0	0	0	4	0	0	0	0	0	0	0	0	0	0	0
d__Bacteria	k__norank_d__Bacteria	p__Proteobacteria	c__Alphaproteobacteria	o__Rhodobacterales	f__Rhodobacteraceae	g__unclassified_f__Rhodobacteraceae	s__unclassified_f__Rhodobacteraceae	ASV86671	0	0	0	0	0	0	0	0	0	0	0	0	0	0	0	0	0	0	0	0	0	0	0	5	0	0	0	0	0	0	0	0	0	0	0	0	0	0	0	0	0
d__Bacteria	k__norank_d__Bacteria	p__Actinobacteriota	c__Actinobacteria	o__Micrococcales	f__Microbacteriaceae	g__unclassified_f__Microbacteriaceae	s__unclassified_f__Microbacteriaceae	ASV12978	0	0	0	0	0	0	0	0	0	0	0	0	2	0	0	0	0	0	0	0	0	0	0	0	0	0	0	0	0	0	0	0	0	0	0	0	0	0	0	0	0
d__Bacteria	k__norank_d__Bacteria	p__unclassified_k__norank_d__Bacteria	c__unclassified_k__norank_d__Bacteria	o__unclassified_k__norank_d__Bacteria	f__unclassified_k__norank_d__Bacteria	g__unclassified_k__norank_d__Bacteria	s__unclassified_k__norank_d__Bacteria	ASV87688	0	0	0	0	0	0	0	0	0	0	0	0	0	0	0	0	0	0	0	0	0	0	0	1	0	0	0	0	0	0	0	0	0	0	0	0	0	0	0	0	0
d__Bacteria	k__norank_d__Bacteria	p__Desulfobacterota	c__norank_p__Desulfobacterota	o__norank_p__Desulfobacterota	f__norank_p__Desulfobacterota	g__norank_p__Desulfobacterota	s__unclassified_g__norank_p__Desulfobacterota	ASV18195	0	0	0	0	0	0	0	0	0	0	0	0	0	0	0	0	0	0	0	0	0	0	0	0	0	0	1	0	0	0	0	0	0	0	0	0	0	0	0	0	0
d__Bacteria	k__norank_d__Bacteria	p__Proteobacteria	c__Gammaproteobacteria	o__unclassified_c__Gammaproteobacteria	f__unclassified_c__Gammaproteobacteria	g__unclassified_c__Gammaproteobacteria	s__unclassified_c__Gammaproteobacteria	ASV59165	0	0	0	0	0	0	0	0	0	0	0	0	0	0	0	0	0	0	0	0	0	0	0	0	0	0	0	0	0	0	0	0	1	0	0	0	0	0	0	0	0
d__Bacteria	k__norank_d__Bacteria	p__Proteobacteria	c__Alphaproteobacteria	o__Sphingomonadales	f__Sphingomonadaceae	g__unclassified_f__Sphingomonadaceae	s__unclassified_f__Sphingomonadaceae	ASV20525	0	0	0	0	0	0	0	0	0	0	0	0	0	0	0	0	0	0	0	0	0	0	0	0	0	0	0	0	0	0	0	0	0	0	3	0	0	0	0	0	0
d__Bacteria	k__norank_d__Bacteria	p__Latescibacterota	c__norank_p__Latescibacterota	o__norank_p__Latescibacterota	f__norank_p__Latescibacterota	g__norank_p__Latescibacterota	s__uncultured_Gemmatimonadetes_bacterium_p__Latescibacterota	ASV17731	0	0	0	0	0	0	0	0	0	0	0	0	0	0	0	0	0	0	0	0	0	3	4	5	2	0	2	0	0	0	0	0	0	0	0	0	0	0	0	0	0
d__Bacteria	k__norank_d__Bacteria	p__Chloroflexi	c__Anaerolineae	o__1-20	f__norank_o__1-20	g__norank_o__1-20	s__uncultured_bacterium_o__1-20	ASV3619	0	0	0	0	7	0	0	0	3	7	0	4	0	5	6	0	0	0	0	0	0	8	15	12	9	4	0	0	0	0	0	0	0	0	0	0	0	0	0	0	0
d__Bacteria	k__norank_d__Bacteria	p__Fusobacteriota	c__Fusobacteriia	o__Fusobacteriales	f__Fusobacteriaceae	g__Propionigenium	s__uncultured_bacterium_g__Propionigenium	ASV3799	0	0	0	0	0	0	0	0	0	0	0	0	0	0	6	0	0	0	0	0	0	0	0	0	0	0	0	0	0	0	0	0	0	0	0	0	0	0	0	0	0
d__Bacteria	k__norank_d__Bacteria	p__Proteobacteria	c__Gammaproteobacteria	o__unclassified_c__Gammaproteobacteria	f__unclassified_c__Gammaproteobacteria	g__unclassified_c__Gammaproteobacteria	s__unclassified_c__Gammaproteobacteria	ASV80309	0	0	0	0	0	0	0	0	0	0	0	0	0	0	0	0	0	0	0	0	0	0	0	0	0	0	0	0	0	2	0	0	0	0	0	0	0	0	0	0	0
d__Bacteria	k__norank_d__Bacteria	p__Proteobacteria	c__Alphaproteobacteria	o__Rhizobiales	f__Rhizobiales_Incertae_Sedis	g__norank_f__Rhizobiales_Incertae_Sedis	s__unclassified_g__norank_f__Rhizobiales_Incertae_Sedis	ASV34392	0	0	0	0	0	0	0	0	0	0	0	0	0	0	0	0	0	0	0	0	0	0	0	0	0	0	0	0	0	0	0	0	0	0	0	0	0	0	0	25	21
d__Bacteria	k__norank_d__Bacteria	p__Actinobacteriota	c__Actinobacteria	o__unclassified_c__Actinobacteria	f__unclassified_c__Actinobacteria	g__unclassified_c__Actinobacteria	s__unclassified_c__Actinobacteria	ASV59919	0	0	0	0	0	0	0	0	0	0	0	0	0	0	0	0	0	0	0	0	0	0	0	0	0	0	0	0	0	0	0	0	0	0	0	0	0	0	0	0	0
d__Bacteria	k__norank_d__Bacteria	p__Dadabacteria	c__Dadabacteriia	o__Dadabacteriales	f__norank_o__Dadabacteriales	g__norank_o__Dadabacteriales	s__uncultured_bacterium_o__Dadabacteriales	ASV21326	9	14	5	0	0	0	0	0	0	0	0	0	0	0	0	18	20	42	0	0	0	0	0	0	0	0	0	0	0	0	0	0	0	0	0	0	0	0	0	0	0
d__Bacteria	k__norank_d__Bacteria	p__Proteobacteria	c__Gammaproteobacteria	o__Cellvibrionales	f__Halieaceae	g__unclassified_f__Halieaceae	s__unclassified_f__Halieaceae	ASV56902	0	1	0	0	0	0	0	0	0	0	0	0	0	0	0	0	0	0	0	0	0	0	0	0	0	0	0	0	0	0	0	0	0	0	0	0	0	0	0	0	0
d__Bacteria	k__norank_d__Bacteria	p__Proteobacteria	c__Gammaproteobacteria	o__Pseudomonadales	f__Moraxellaceae	g__Acinetobacter	s__unclassified_g__Acinetobacter	ASV86119	0	0	0	0	0	0	0	0	0	0	0	0	0	0	0	0	0	0	0	0	0	0	0	0	0	0	0	0	0	0	0	0	0	0	0	0	0	0	0	0	0
d__Bacteria	k__norank_d__Bacteria	p__unclassified_k__norank_d__Bacteria	c__unclassified_k__norank_d__Bacteria	o__unclassified_k__norank_d__Bacteria	f__unclassified_k__norank_d__Bacteria	g__unclassified_k__norank_d__Bacteria	s__unclassified_k__norank_d__Bacteria	ASV76896	0	0	0	0	0	0	0	0	0	0	0	0	0	0	0	0	0	0	0	0	0	0	0	0	0	0	0	0	0	0	0	0	0	0	0	0	0	0	0	0	0
d__Bacteria	k__norank_d__Bacteria	p__SAR324_cladeMarine_group_B	c__norank_p__SAR324_cladeMarine_group_B	o__norank_p__SAR324_cladeMarine_group_B	f__norank_p__SAR324_cladeMarine_group_B	g__norank_p__SAR324_cladeMarine_group_B	s__uncultured_bacterium_p__SAR324_cladeMarine_group_B	ASV57842	0	0	0	0	0	0	0	0	0	0	0	0	0	0	0	0	0	0	0	0	0	0	0	0	0	0	0	0	0	0	0	0	4	0	0	0	0	0	0	0	0
d__Bacteria	k__norank_d__Bacteria	p__Proteobacteria	c__Gammaproteobacteria	o__Gammaproteobacteria_Incertae_Sedis	f__unclassified_o__Gammaproteobacteria_Incertae_Sedis	g__Candidatus_Berkiella	s__unclassified_g__Candidatus_Berkiella	ASV73492	0	0	0	0	0	0	0	0	0	0	0	0	0	0	0	0	0	0	0	0	0	0	0	0	0	2	0	0	0	0	0	0	0	0	0	0	0	0	0	0	0
d__Bacteria	k__norank_d__Bacteria	p__Proteobacteria	c__Gammaproteobacteria	o__unclassified_c__Gammaproteobacteria	f__unclassified_c__Gammaproteobacteria	g__unclassified_c__Gammaproteobacteria	s__unclassified_c__Gammaproteobacteria	ASV27939	0	0	0	0	0	0	0	0	0	0	0	0	0	0	0	0	0	0	0	0	0	0	0	0	0	0	0	0	0	0	0	0	0	6	0	0	0	0	0	0	0
d__Bacteria	k__norank_d__Bacteria	p__Chloroflexi	c__Anaerolineae	o__Anaerolineales	f__Anaerolineaceae	g__ADurb.Bin120	s__uncultured_Anaerolineaceae_bacterium_g__ADurb.Bin120	ASV21159	0	0	0	0	0	0	0	0	0	0	0	0	0	0	0	0	0	0	0	0	0	0	0	0	0	0	0	0	0	0	0	0	0	0	1	0	0	0	0	0	0
d__Bacteria	k__norank_d__Bacteria	p__unclassified_k__norank_d__Bacteria	c__unclassified_k__norank_d__Bacteria	o__unclassified_k__norank_d__Bacteria	f__unclassified_k__norank_d__Bacteria	g__unclassified_k__norank_d__Bacteria	s__unclassified_k__norank_d__Bacteria	ASV95166	0	0	0	0	0	0	0	0	0	0	0	0	0	0	0	0	0	0	0	0	0	0	0	0	0	0	0	0	0	0	0	0	0	0	0	0	0	0	0	0	0
d__Bacteria	k__norank_d__Bacteria	p__Firmicutes	c__Clostridia	o__Lachnospirales	f__Lachnospiraceae	g__Anaerostignum	s__unclassified_g__Anaerostignum	ASV48379	0	0	0	0	0	0	0	0	2	0	5	0	0	0	0	0	0	0	0	0	0	0	0	0	0	0	0	0	0	0	0	0	2	0	0	0	0	0	0	0	0
d__Bacteria	k__norank_d__Bacteria	p__Zixibacteria	c__norank_p__Zixibacteria	o__norank_p__Zixibacteria	f__norank_p__Zixibacteria	g__norank_p__Zixibacteria	s__uncultured_bacterium_p__Zixibacteria	ASV87635	0	0	0	0	0	0	0	0	0	0	0	0	0	0	0	0	0	0	0	0	0	0	0	2	0	0	0	0	0	0	0	0	0	0	0	0	0	0	0	0	0
d__Bacteria	k__norank_d__Bacteria	p__Cyanobacteria	c__Cyanobacteriia	o__Cyanobacteriales	f__Phormidiaceae	g__Arthrospira_PCC-7345	s__unclassified_g__Arthrospira_PCC-7345	ASV16704	0	0	0	0	0	0	0	0	0	0	0	0	0	0	0	0	0	0	0	0	0	0	0	0	0	0	6	0	0	0	0	0	0	0	0	0	0	0	0	0	0
d__Bacteria	k__norank_d__Bacteria	p__Proteobacteria	c__Alphaproteobacteria	o__unclassified_c__Alphaproteobacteria	f__unclassified_c__Alphaproteobacteria	g__unclassified_c__Alphaproteobacteria	s__unclassified_c__Alphaproteobacteria	ASV100089	0	0	0	0	0	0	0	0	0	0	0	0	0	0	0	0	2	0	0	0	0	0	0	0	0	0	0	0	0	0	0	0	0	0	0	0	0	0	0	0	0
d__Bacteria	k__norank_d__Bacteria	p__Proteobacteria	c__Gammaproteobacteria	o__unclassified_c__Gammaproteobacteria	f__unclassified_c__Gammaproteobacteria	g__unclassified_c__Gammaproteobacteria	s__unclassified_c__Gammaproteobacteria	ASV74141	0	0	0	0	0	0	0	0	0	0	0	0	0	0	0	0	0	0	0	0	0	0	0	0	0	1	0	0	0	0	0	0	0	0	0	0	0	0	0	0	0
d__Bacteria	k__norank_d__Bacteria	p__Nitrospirota	c__Nitrospiria	o__Nitrospirales	f__Nitrospiraceae	g__Nitrospira	s__unclassified_g__Nitrospira	ASV3517	0	0	0	0	0	0	0	0	0	3	25	0	6	0	12	0	0	13	0	0	0	0	0	0	0	0	0	0	0	0	0	0	0	0	0	0	0	0	0	0	0
d__Bacteria	k__norank_d__Bacteria	p__Proteobacteria	c__Gammaproteobacteria	o__unclassified_c__Gammaproteobacteria	f__unclassified_c__Gammaproteobacteria	g__unclassified_c__Gammaproteobacteria	s__unclassified_c__Gammaproteobacteria	ASV60508	0	0	0	0	0	0	0	0	0	0	0	0	0	0	0	0	0	0	0	0	0	0	0	0	0	0	0	0	0	0	0	0	0	0	0	0	0	0	0	0	0
d__Bacteria	k__norank_d__Bacteria	p__Myxococcota	c__Polyangia	o__Polyangiales	f__BIrii41	g__norank_f__BIrii41	s__uncultured_bacterium_f__BIrii41	ASV50505	0	0	0	0	0	0	0	0	0	2	0	0	0	0	0	0	0	0	0	0	0	0	0	0	0	0	0	0	0	0	0	0	0	0	0	0	0	0	0	0	0
d__Bacteria	k__norank_d__Bacteria	p__Chloroflexi	c__Anaerolineae	o__unclassified_c__Anaerolineae	f__unclassified_c__Anaerolineae	g__unclassified_c__Anaerolineae	s__unclassified_c__Anaerolineae	ASV94683	0	0	0	0	0	0	0	0	0	0	0	0	0	0	0	0	0	0	0	0	0	0	0	0	0	0	0	0	0	0	0	0	0	0	0	0	0	0	0	0	0
d__Bacteria	k__norank_d__Bacteria	p__Cyanobacteria	c__Cyanobacteriia	o__Cyanobacteriales	f__Microcystaceae	g__Synechocystis_PCC-6803	s__unclassified_g__Synechocystis_PCC-6803	ASV25718	0	0	0	0	0	0	0	0	0	0	0	0	0	0	0	0	0	0	0	0	0	5	0	0	0	0	0	0	0	0	0	0	0	0	0	0	0	0	0	0	0
d__Bacteria	k__norank_d__Bacteria	p__Bdellovibrionota	c__Bdellovibrionia	o__Bdellovibrionales	f__Bdellovibrionaceae	g__Bdellovibrio	s__unclassified_g__Bdellovibrio	ASV43950	0	0	0	0	0	0	3	0	0	0	0	0	0	0	0	0	0	0	0	0	0	0	0	0	0	0	0	0	0	0	0	0	0	0	0	0	0	0	0	0	0
d__Bacteria	k__norank_d__Bacteria	p__Bacteroidota	c__Bacteroidia	o__Bacteroidales	f__unclassified_o__Bacteroidales	g__unclassified_o__Bacteroidales	s__unclassified_o__Bacteroidales	ASV39370	0	0	0	0	0	0	0	0	0	0	0	0	0	0	0	0	0	0	2	0	0	0	0	0	0	0	0	0	0	0	0	0	0	0	0	0	0	0	0	0	0
d__Bacteria	k__norank_d__Bacteria	p__Firmicutes	c__Clostridia	o__Clostridiales	f__norank_o__Clostridiales	g__norank_o__Clostridiales	s__uncultured_bacterium_o__Clostridiales	ASV47924	0	0	0	0	0	0	0	0	3	0	0	0	0	0	0	0	0	0	0	0	0	0	0	0	0	0	0	0	0	0	0	0	0	0	0	0	0	0	0	0	0
d__Bacteria	k__norank_d__Bacteria	p__Acidobacteriota	c__Vicinamibacteria	o__Vicinamibacterales	f__norank_o__Vicinamibacterales	g__norank_o__Vicinamibacterales	s__unclassified_g__norank_o__Vicinamibacterales	ASV61549	0	0	0	0	0	0	0	0	0	0	0	0	0	3	0	0	0	0	0	0	0	0	0	0	0	0	0	0	0	0	0	0	0	0	0	0	0	0	0	0	0
d__Bacteria	k__norank_d__Bacteria	p__Bacteroidota	c__Bacteroidia	o__Flavobacteriales	f__Flavobacteriaceae	g__unclassified_f__Flavobacteriaceae	s__unclassified_f__Flavobacteriaceae	ASV41554	0	0	0	0	0	0	0	0	0	0	0	0	0	0	0	0	0	0	0	3	0	0	0	0	0	0	0	0	0	0	0	0	0	0	0	0	0	0	0	0	0
d__Bacteria	k__norank_d__Bacteria	p__Planctomycetota	c__OM190	o__norank_c__OM190	f__norank_c__OM190	g__norank_c__OM190	s__unclassified_g__norank_c__OM190	ASV30119	0	0	0	0	0	0	0	0	0	0	0	0	0	0	0	0	0	0	0	0	0	0	2	0	0	0	0	0	0	0	0	0	0	0	0	0	0	0	0	0	0
d__Bacteria	k__norank_d__Bacteria	p__Firmicutes	c__Bacilli	o__Bacillales	f__Bacillaceae	g__Bacillus	s__unclassified_g__Bacillus	ASV20258	0	0	0	0	0	0	0	0	0	0	0	0	0	0	0	0	0	0	0	0	0	0	0	0	0	0	0	0	0	0	0	0	0	0	4	0	0	0	0	0	0
d__Bacteria	k__norank_d__Bacteria	p__Proteobacteria	c__Gammaproteobacteria	o__unclassified_c__Gammaproteobacteria	f__unclassified_c__Gammaproteobacteria	g__unclassified_c__Gammaproteobacteria	s__unclassified_c__Gammaproteobacteria	ASV90919	0	0	0	0	0	0	0	0	0	0	0	0	0	0	0	0	0	0	0	0	3	0	0	0	0	0	0	0	0	0	0	0	0	0	0	0	0	0	0	0	0
d__Bacteria	k__norank_d__Bacteria	p__Chloroflexi	c__Anaerolineae	o__Ardenticatenales	f__norank_o__Ardenticatenales	g__norank_o__Ardenticatenales	s__unclassified_g__norank_o__Ardenticatenales	ASV34325	0	0	0	0	0	0	0	0	0	0	0	0	0	0	0	0	0	0	0	0	0	0	0	0	0	0	0	0	0	0	0	0	0	0	0	0	0	0	0	0	0
d__Bacteria	k__norank_d__Bacteria	p__Gemmatimonadota	c__BD2-11_terrestrial_group	o__norank_c__BD2-11_terrestrial_group	f__norank_c__BD2-11_terrestrial_group	g__norank_c__BD2-11_terrestrial_group	s__unclassified_g__norank_c__BD2-11_terrestrial_group	ASV81745	0	0	0	0	0	0	0	0	0	0	0	0	0	0	0	0	0	0	0	0	0	0	0	0	0	0	0	0	0	2	0	0	0	0	0	0	0	0	0	0	0
d__Bacteria	k__norank_d__Bacteria	p__Chloroflexi	c__Dehalococcoidia	o__Dehalococcoidales	f__norank_o__Dehalococcoidales	g__norank_o__Dehalococcoidales	s__uncultured_bacterium_o__Dehalococcoidales	ASV5735	0	0	0	0	0	0	0	0	0	0	0	0	0	0	3	0	0	0	0	0	0	0	0	0	0	0	0	0	0	0	0	0	0	0	0	0	0	0	0	0	0
d__Bacteria	k__norank_d__Bacteria	p__Proteobacteria	c__Alphaproteobacteria	o__Rhodobacterales	f__Rhodobacteraceae	g__unclassified_f__Rhodobacteraceae	s__unclassified_f__Rhodobacteraceae	ASV100207	0	0	0	0	0	0	0	0	0	0	0	0	0	0	0	0	3	0	0	0	0	0	0	0	0	0	0	0	0	0	0	0	0	0	0	0	0	0	0	0	0
d__Bacteria	k__norank_d__Bacteria	p__unclassified_k__norank_d__Bacteria	c__unclassified_k__norank_d__Bacteria	o__unclassified_k__norank_d__Bacteria	f__unclassified_k__norank_d__Bacteria	g__unclassified_k__norank_d__Bacteria	s__unclassified_k__norank_d__Bacteria	ASV33966	0	0	0	0	0	0	0	0	0	0	0	0	0	0	0	0	0	0	0	0	0	0	0	0	0	0	0	0	0	0	0	0	0	0	0	0	0	0	0	0	0
d__Bacteria	k__norank_d__Bacteria	p__Proteobacteria	c__Gammaproteobacteria	o__Diplorickettsiales	f__Diplorickettsiaceae	g__Aquicella	s__unclassified_g__Aquicella	ASV64689	0	0	0	0	0	0	0	0	0	0	0	0	0	0	0	0	0	0	0	0	0	0	0	0	0	0	0	0	0	0	0	0	0	0	0	0	0	0	0	0	0
d__Bacteria	k__norank_d__Bacteria	p__Proteobacteria	c__Gammaproteobacteria	o__Gammaproteobacteria_Incertae_Sedis	f__unclassified_o__Gammaproteobacteria_Incertae_Sedis	g__norank_f__unclassified_o__Gammaproteobacteria_Incertae_Sedis	s__unclassified_g__norank_f__unclassified_o__Gammaproteobacteria_Incertae_Sedis	ASV8352	0	0	0	0	0	0	0	0	0	0	0	0	0	0	0	0	0	0	0	0	0	0	0	0	0	0	0	0	7	0	0	0	0	0	0	0	0	0	0	0	0
d__Bacteria	k__norank_d__Bacteria	p__Chloroflexi	c__Anaerolineae	o__RBG-13-54-9	f__norank_o__RBG-13-54-9	g__norank_o__RBG-13-54-9	s__uncultured_soil_bacterium_o__RBG-13-54-9	ASV35061	0	0	0	0	0	0	0	0	0	0	0	0	0	0	0	0	0	0	0	0	0	0	0	0	0	0	0	0	0	0	0	0	0	0	0	0	0	0	0	0	0
d__Bacteria	k__norank_d__Bacteria	p__Acidobacteriota	c__AT-s3-28	o__norank_c__AT-s3-28	f__norank_c__AT-s3-28	g__norank_c__AT-s3-28	s__uncultured_bacterium_c__AT-s3-28	ASV80047	0	0	0	0	0	0	0	0	0	0	0	0	0	0	0	0	0	0	0	0	0	0	0	0	0	0	0	0	0	5	0	0	0	0	0	0	0	0	0	0	0
d__Bacteria	k__norank_d__Bacteria	p__Proteobacteria	c__Gammaproteobacteria	o__unclassified_c__Gammaproteobacteria	f__unclassified_c__Gammaproteobacteria	g__unclassified_c__Gammaproteobacteria	s__unclassified_c__Gammaproteobacteria	ASV32108	0	0	0	0	0	0	0	0	0	0	0	0	0	0	0	0	0	0	0	0	0	0	0	0	0	0	0	0	0	0	0	0	0	0	0	0	1	0	0	0	0
d__Bacteria	k__norank_d__Bacteria	p__Modulibacteria	c__Moduliflexia	o__Moduliflexales	f__Moduliflexaceae	g__norank_f__Moduliflexaceae	s__unclassified_g__norank_f__Moduliflexaceae	ASV63418	0	0	0	0	0	0	0	0	0	0	0	0	0	0	0	0	0	0	0	0	0	0	0	0	0	0	0	0	0	0	0	0	0	0	0	1	0	0	0	0	0
d__Bacteria	k__norank_d__Bacteria	p__Chloroflexi	c__Anaerolineae	o__Caldilineales	f__Caldilineaceae	g__norank_f__Caldilineaceae	s__unclassified_g__norank_f__Caldilineaceae	ASV33229	0	0	0	0	0	0	0	0	0	0	0	0	0	0	0	0	0	0	0	0	0	0	0	0	0	0	0	0	0	0	0	0	0	0	0	0	0	0	0	0	0
d__Bacteria	k__norank_d__Bacteria	p__Firmicutes	c__Clostridia	o__Peptostreptococcales-Tissierellales	f__Peptostreptococcaceae	g__Romboutsia	s__unclassified_g__Romboutsia	ASV23665	0	0	0	0	0	0	0	0	0	0	0	0	0	0	0	0	0	2	0	0	0	0	0	0	0	0	0	0	0	0	0	0	0	0	0	0	0	0	0	0	0
d__Bacteria	k__norank_d__Bacteria	p__Proteobacteria	c__Alphaproteobacteria	o__unclassified_c__Alphaproteobacteria	f__unclassified_c__Alphaproteobacteria	g__unclassified_c__Alphaproteobacteria	s__unclassified_c__Alphaproteobacteria	ASV67709	0	0	0	0	0	0	0	0	0	0	0	0	0	0	0	3	0	0	0	0	0	0	0	0	0	0	0	0	0	0	0	0	0	0	0	0	0	0	0	0	0
d__Bacteria	k__norank_d__Bacteria	p__unclassified_k__norank_d__Bacteria	c__unclassified_k__norank_d__Bacteria	o__unclassified_k__norank_d__Bacteria	f__unclassified_k__norank_d__Bacteria	g__unclassified_k__norank_d__Bacteria	s__unclassified_k__norank_d__Bacteria	ASV19365	0	0	0	0	0	0	0	0	0	0	0	0	0	0	0	0	0	0	0	0	0	0	0	0	0	0	2	0	0	0	0	0	0	0	0	0	0	0	0	0	0
d__Bacteria	k__norank_d__Bacteria	p__Desulfobacterota	c__Desulfuromonadia	o__norank_c__Desulfuromonadia	f__Geothermobacteraceae	g__Geothermobacter	s__bacterium_ROME215Asa	ASV44961	0	0	0	9	0	0	0	0	0	0	0	0	0	0	0	0	0	0	0	0	0	0	0	0	0	0	0	0	0	0	0	0	0	0	0	0	0	0	0	0	0
d__Bacteria	k__norank_d__Bacteria	p__Gemmatimonadota	c__BD2-11_terrestrial_group	o__norank_c__BD2-11_terrestrial_group	f__norank_c__BD2-11_terrestrial_group	g__norank_c__BD2-11_terrestrial_group	s__unclassified_g__norank_c__BD2-11_terrestrial_group	ASV30798	0	0	0	0	0	0	0	0	0	0	0	0	0	0	0	0	0	0	0	0	0	0	1	0	0	0	0	0	0	0	0	0	0	0	0	0	0	0	0	0	0
d__Bacteria	k__norank_d__Bacteria	p__Desulfobacterota	c__Desulfobacteria	o__Desulfobacterales	f__Desulfosarcinaceae	g__Desulfosarcina	s__unclassified_g__Desulfosarcina	ASV17307	0	0	0	0	0	0	0	0	0	0	0	0	0	0	0	0	0	0	0	0	0	0	4	7	5	0	3	0	0	0	0	0	0	0	0	0	0	0	0	0	0
d__Bacteria	k__norank_d__Bacteria	p__Chloroflexi	c__Anaerolineae	o__SJA-15	f__norank_o__SJA-15	g__norank_o__SJA-15	s__uncultured_bacterium_o__SJA-15	ASV10937	0	0	0	0	0	0	0	0	0	7	0	0	9	0	0	0	0	0	0	0	0	0	0	0	0	0	0	0	0	0	0	0	0	0	0	0	0	0	0	0	0
d__Bacteria	k__norank_d__Bacteria	p__Acidobacteriota	c__Holophagae	o__Acanthopleuribacterales	f__Acanthopleuribacteraceae	g__Thermotomaculum	s__uncultured_bacterium_g__Thermotomaculum	ASV78177	0	0	0	0	0	0	0	0	0	0	0	0	0	0	0	0	0	0	0	0	0	0	0	0	0	0	0	0	0	0	0	4	0	0	0	0	0	0	0	0	0
d__Bacteria	k__norank_d__Bacteria	p__Latescibacterota	c__norank_p__Latescibacterota	o__norank_p__Latescibacterota	f__norank_p__Latescibacterota	g__norank_p__Latescibacterota	s__uncultured_bacterium_p__Latescibacterota	ASV4759	0	0	0	0	0	0	0	0	0	0	0	0	0	0	3	0	0	0	0	0	0	0	0	0	0	0	0	0	0	0	0	0	0	0	0	0	0	0	0	0	0
d__Bacteria	k__norank_d__Bacteria	p__Desulfobacterota	c__Desulfobaccia	o__Desulfobaccales	f__Desulfobaccaceae	g__Desulfobacca	s__uncultured_delta_proteobacterium_g__Desulfobacca	ASV88333	0	0	0	0	0	0	0	0	0	0	0	0	0	0	0	0	0	0	0	0	0	0	0	1	0	0	0	0	0	0	0	0	0	0	0	0	0	0	0	0	0
d__Bacteria	k__norank_d__Bacteria	p__Chloroflexi	c__Anaerolineae	o__ADurb.Bin180	f__norank_o__ADurb.Bin180	g__norank_o__ADurb.Bin180	s__uncultured_bacterium_o__ADurb.Bin180	ASV92972	0	0	0	0	0	0	0	0	0	0	0	3	0	0	0	0	0	0	0	0	0	0	0	0	0	0	0	0	0	0	0	0	0	0	0	0	0	0	0	0	0
d__Bacteria	k__norank_d__Bacteria	p__Firmicutes	c__Bacilli	o__Exiguobacterales	f__Exiguobacteraceae	g__Exiguobacterium	s__unclassified_g__Exiguobacterium	ASV89091	0	0	0	0	0	0	0	0	0	0	0	0	0	0	0	0	0	0	0	0	0	0	0	0	0	0	0	0	0	0	0	0	0	0	0	0	0	0	0	0	0
d__Bacteria	k__norank_d__Bacteria	p__Proteobacteria	c__Alphaproteobacteria	o__Rickettsiales	f__Rickettsiaceae	g__unclassified_f__Rickettsiaceae	s__unclassified_f__Rickettsiaceae	ASV67749	0	0	0	0	0	0	0	0	0	0	0	0	0	0	0	3	0	0	0	0	0	0	0	0	0	0	0	0	0	0	0	0	0	0	0	0	0	0	0	0	0
d__Bacteria	k__norank_d__Bacteria	p__Latescibacterota	c__norank_p__Latescibacterota	o__norank_p__Latescibacterota	f__norank_p__Latescibacterota	g__norank_p__Latescibacterota	s__unclassified_g__norank_p__Latescibacterota	ASV17491	0	0	0	0	0	0	0	0	0	0	0	0	0	0	0	0	0	0	0	0	0	0	0	0	0	0	3	0	0	0	0	0	0	0	0	0	0	0	0	0	0
d__Bacteria	k__norank_d__Bacteria	p__Verrucomicrobiota	c__Verrucomicrobiae	o__Verrucomicrobiales	f__Rubritaleaceae	g__Persicirhabdus	s__uncultured_bacterium_g__Persicirhabdus	ASV92662	0	0	0	0	0	0	0	0	0	0	0	5	0	0	0	0	0	0	0	0	0	0	0	0	0	0	0	0	0	0	0	0	0	0	0	0	0	0	0	0	0
d__Bacteria	k__norank_d__Bacteria	p__Proteobacteria	c__Gammaproteobacteria	o__Gammaproteobacteria_Incertae_Sedis	f__unclassified_o__Gammaproteobacteria_Incertae_Sedis	g__norank_f__unclassified_o__Gammaproteobacteria_Incertae_Sedis	s__unidentified_marine_bacterioplankton_f__unclassified_o__Gammaproteobacteria_Incertae_Sedis	ASV19447	0	0	0	0	0	0	0	0	0	0	0	0	0	0	0	0	0	0	0	0	0	0	0	0	0	0	0	0	0	0	0	17	21	10	42	0	0	0	0	0	0
d__Bacteria	k__norank_d__Bacteria	p__Proteobacteria	c__Gammaproteobacteria	o__unclassified_c__Gammaproteobacteria	f__unclassified_c__Gammaproteobacteria	g__unclassified_c__Gammaproteobacteria	s__unclassified_c__Gammaproteobacteria	ASV97431	0	0	0	0	0	0	0	0	0	0	0	0	0	0	0	0	0	0	0	0	0	0	0	0	12	0	0	0	0	0	0	0	0	0	0	0	0	0	0	0	0
d__Bacteria	k__norank_d__Bacteria	p__Proteobacteria	c__Gammaproteobacteria	o__Gammaproteobacteria_Incertae_Sedis	f__unclassified_o__Gammaproteobacteria_Incertae_Sedis	g__Candidatus_Berkiella	s__uncultured_bacterium_g__Candidatus_Berkiella	ASV24828	0	0	0	0	0	0	0	0	0	0	0	0	0	0	0	0	0	2	0	0	0	0	0	0	0	0	0	0	0	0	0	0	0	0	0	0	0	0	0	0	0
d__Bacteria	k__norank_d__Bacteria	p__Actinobacteriota	c__Acidimicrobiia	o__Microtrichales	f__unclassified_o__Microtrichales	g__unclassified_o__Microtrichales	s__unclassified_o__Microtrichales	ASV29786	0	0	0	0	0	0	0	0	0	0	0	0	0	0	0	0	0	0	0	0	0	0	2	0	0	0	0	0	0	0	0	0	0	0	0	0	0	0	0	0	0
d__Bacteria	k__norank_d__Bacteria	p__unclassified_k__norank_d__Bacteria	c__unclassified_k__norank_d__Bacteria	o__unclassified_k__norank_d__Bacteria	f__unclassified_k__norank_d__Bacteria	g__unclassified_k__norank_d__Bacteria	s__unclassified_k__norank_d__Bacteria	ASV10268	0	0	0	0	0	0	0	0	0	0	0	0	0	0	0	0	0	0	0	0	0	0	0	0	0	0	0	0	2	0	0	0	0	0	0	0	0	0	0	0	0
d__Bacteria	k__norank_d__Bacteria	p__Firmicutes	c__Bacilli	o__Bacillales	f__Bacillaceae	g__unclassified_f__Bacillaceae	s__unclassified_f__Bacillaceae	ASV24160	0	0	0	0	0	0	0	0	0	0	0	0	0	0	0	0	0	2	0	0	0	0	0	0	0	0	0	0	0	0	0	0	0	0	0	0	0	0	0	0	0
d__Bacteria	k__norank_d__Bacteria	p__Actinobacteriota	c__Actinobacteria	o__unclassified_c__Actinobacteria	f__unclassified_c__Actinobacteria	g__unclassified_c__Actinobacteria	s__unclassified_c__Actinobacteria	ASV88100	0	0	0	0	0	0	0	0	0	0	0	0	0	0	0	0	0	0	0	0	0	0	0	2	0	0	0	0	0	0	0	0	0	0	0	0	0	0	0	0	0
d__Bacteria	k__norank_d__Bacteria	p__Bacteroidota	c__Bacteroidia	o__Chitinophagales	f__Saprospiraceae	g__norank_f__Saprospiraceae	s__unclassified_g__norank_f__Saprospiraceae	ASV27390	0	0	0	0	0	0	0	0	0	0	0	0	0	0	0	0	0	0	0	0	0	2	0	0	0	0	0	0	0	0	0	0	0	0	0	0	0	0	0	0	0
d__Bacteria	k__norank_d__Bacteria	p__Myxococcota	c__Myxococcia	o__Myxococcales	f__Myxococcaceae	g__P3OB-42	s__unclassified_g__P3OB-42	ASV24605	0	0	0	0	0	0	0	0	0	0	0	0	0	0	0	0	0	2	0	0	0	0	0	0	0	0	0	0	0	0	0	0	0	0	0	0	0	0	0	0	0
d__Bacteria	k__norank_d__Bacteria	p__Actinobacteriota	c__Thermoleophilia	o__Solirubrobacterales	f__unclassified_o__Solirubrobacterales	g__unclassified_o__Solirubrobacterales	s__unclassified_o__Solirubrobacterales	ASV73166	0	0	0	0	0	0	0	0	0	0	0	0	0	0	0	0	0	0	0	0	0	0	0	0	0	3	0	0	0	0	0	0	0	0	0	0	0	0	0	0	0
d__Bacteria	k__norank_d__Bacteria	p__Firmicutes	c__Clostridia	o__Peptostreptococcales-Tissierellales	f__Anaerovoracaceae	g__unclassified_f__Anaerovoracaceae	s__unclassified_f__Anaerovoracaceae	ASV76959	0	0	0	0	0	0	0	0	0	0	0	0	0	0	0	0	0	0	0	0	0	0	0	0	0	0	0	0	0	0	0	0	0	0	0	0	0	0	0	0	0
d__Bacteria	k__norank_d__Bacteria	p__Actinobacteriota	c__Thermoleophilia	o__Gaiellales	f__norank_o__Gaiellales	g__norank_o__Gaiellales	s__unclassified_g__norank_o__Gaiellales	ASV90443	0	0	0	0	0	0	0	0	0	0	0	0	0	0	0	0	0	0	0	0	4	0	0	0	0	0	0	0	0	0	0	0	0	0	0	0	0	0	0	0	0
d__Bacteria	k__norank_d__Bacteria	p__Calditrichota	c__Calditrichia	o__Calditrichales	f__Calditrichaceae	g__Calorithrix	s__uncultured_bacterium_g__Calorithrix	ASV29291	0	0	0	0	0	0	0	0	0	0	0	0	0	0	0	0	0	0	0	0	0	0	6	0	0	0	0	0	0	0	0	0	0	0	0	0	0	0	0	0	0
d__Bacteria	k__norank_d__Bacteria	p__Planctomycetota	c__ODP123	o__norank_c__ODP123	f__norank_c__ODP123	g__norank_c__ODP123	s__uncultured_organism_c__ODP123	ASV61896	0	0	0	0	0	0	0	0	0	0	0	0	0	2	0	0	0	0	0	0	0	0	0	0	0	0	0	0	0	0	0	0	0	0	0	0	0	0	0	0	0
d__Bacteria	k__norank_d__Bacteria	p__Firmicutes	c__Clostridia	o__Clostridiales	f__Clostridiaceae	g__unclassified_f__Clostridiaceae	s__unclassified_f__Clostridiaceae	ASV97215	0	0	0	0	0	0	0	0	0	0	0	0	0	0	0	0	0	0	0	0	0	0	0	0	0	0	0	0	0	0	0	0	0	0	0	0	0	0	0	0	2
d__Bacteria	k__norank_d__Bacteria	p__Nitrospirota	c__Nitrospiria	o__Nitrospirales	f__Nitrospiraceae	g__Nitrospira	s__unclassified_g__Nitrospira	ASV60736	0	0	0	0	0	0	0	0	0	0	0	22	0	17	0	0	0	0	0	0	0	0	0	0	0	0	0	0	0	0	0	0	0	0	0	0	0	0	0	0	0
d__Bacteria	k__norank_d__Bacteria	p__Myxococcota	c__Polyangia	o__unclassified_c__Polyangia	f__unclassified_c__Polyangia	g__unclassified_c__Polyangia	s__unclassified_c__Polyangia	ASV2297	0	0	0	0	0	0	0	0	0	0	0	0	0	0	0	0	0	0	0	0	0	0	0	0	0	0	0	0	0	0	0	0	0	0	0	0	0	0	0	0	0
d__Bacteria	k__norank_d__Bacteria	p__Actinobacteriota	c__Acidimicrobiia	o__IMCC26256	f__norank_o__IMCC26256	g__norank_o__IMCC26256	s__unclassified_g__norank_o__IMCC26256	ASV31920	0	0	0	0	0	0	0	0	0	0	0	0	0	0	0	0	0	0	0	0	0	0	0	0	0	0	0	0	0	0	0	0	0	0	0	0	2	0	0	0	0
d__Bacteria	k__norank_d__Bacteria	p__Proteobacteria	c__Alphaproteobacteria	o__Rhodobacterales	f__Rhodobacteraceae	g__unclassified_f__Rhodobacteraceae	s__unclassified_f__Rhodobacteraceae	ASV88121	0	0	0	0	0	0	0	0	0	0	0	0	0	0	0	0	0	0	0	0	0	0	0	2	0	0	0	0	0	0	0	0	0	0	0	0	0	0	0	0	0
d__Bacteria	k__norank_d__Bacteria	p__Poribacteria	c__norank_p__Poribacteria	o__norank_p__Poribacteria	f__norank_p__Poribacteria	g__norank_p__Poribacteria	s__uncultured_Firmicutes_bacterium_p__Poribacteria	ASV87584	0	0	0	0	0	0	0	0	0	0	0	0	0	0	0	0	0	0	0	0	0	0	0	1	0	0	0	0	0	0	0	0	0	0	0	0	0	0	0	0	0
d__Bacteria	k__norank_d__Bacteria	p__Bacteroidota	c__Bacteroidia	o__Flavobacteriales	f__Flavobacteriaceae	g__Flavobacterium	s__Flavobacterium_dongtanense	ASV57095	0	2	0	0	0	0	0	0	0	0	0	0	0	0	0	0	0	0	0	0	0	0	0	0	0	0	0	0	0	0	0	0	0	0	0	0	0	0	0	0	0
d__Bacteria	k__norank_d__Bacteria	p__Firmicutes	c__Clostridia	o__Oscillospirales	f__Oscillospiraceae	g__Intestinimonas	s__unclassified_g__Intestinimonas	ASV83480	0	0	0	0	0	0	0	0	0	0	0	0	0	0	0	0	0	0	0	0	0	0	0	0	0	0	0	0	0	0	2	0	0	0	0	0	0	0	0	0	0
d__Bacteria	k__norank_d__Bacteria	p__Proteobacteria	c__Gammaproteobacteria	o__unclassified_c__Gammaproteobacteria	f__unclassified_c__Gammaproteobacteria	g__unclassified_c__Gammaproteobacteria	s__unclassified_c__Gammaproteobacteria	ASV97199	0	0	0	0	0	0	0	0	0	0	0	0	0	0	0	0	0	0	0	0	0	0	0	0	0	0	0	0	0	0	0	0	0	0	0	0	0	0	0	0	1
d__Bacteria	k__norank_d__Bacteria	p__Campilobacterota	c__Campylobacteria	o__Campylobacterales	f__Sulfurovaceae	g__Sulfurovum	s__unclassified_g__Sulfurovum	ASV67914	0	0	0	0	0	0	0	0	0	0	0	0	0	0	0	3	0	0	0	0	0	0	0	0	0	0	0	0	0	0	0	0	0	0	0	0	0	0	0	0	0
d__Bacteria	k__norank_d__Bacteria	p__unclassified_k__norank_d__Bacteria	c__unclassified_k__norank_d__Bacteria	o__unclassified_k__norank_d__Bacteria	f__unclassified_k__norank_d__Bacteria	g__unclassified_k__norank_d__Bacteria	s__unclassified_k__norank_d__Bacteria	ASV84197	0	0	0	0	0	0	0	0	0	0	0	0	0	0	0	0	0	0	0	0	0	0	0	0	0	0	0	0	0	0	1	0	0	0	0	0	0	0	0	0	0
d__Bacteria	k__norank_d__Bacteria	p__Proteobacteria	c__Alphaproteobacteria	o__Rhodobacterales	f__Rhodobacteraceae	g__unclassified_f__Rhodobacteraceae	s__unclassified_f__Rhodobacteraceae	ASV30888	0	0	0	0	0	0	0	0	0	0	0	0	0	0	0	0	0	0	0	0	0	0	2	0	0	0	0	0	0	0	0	0	0	0	0	0	0	0	0	0	0
d__Bacteria	k__norank_d__Bacteria	p__unclassified_k__norank_d__Bacteria	c__unclassified_k__norank_d__Bacteria	o__unclassified_k__norank_d__Bacteria	f__unclassified_k__norank_d__Bacteria	g__unclassified_k__norank_d__Bacteria	s__unclassified_k__norank_d__Bacteria	ASV27136	0	0	0	0	0	0	0	0	0	0	0	0	0	0	0	0	0	0	0	0	0	1	0	0	0	0	0	0	0	0	0	0	0	0	0	0	0	0	0	0	0
d__Bacteria	k__norank_d__Bacteria	p__Planctomycetota	c__Planctomycetes	o__Gemmatales	f__Gemmataceae	g__norank_f__Gemmataceae	s__unclassified_g__norank_f__Gemmataceae	ASV51033	0	0	0	0	3	0	0	0	0	0	0	0	0	0	0	0	0	0	0	0	0	0	0	0	0	0	0	0	0	0	0	0	0	0	0	0	0	0	0	0	0
d__Bacteria	k__norank_d__Bacteria	p__MBNT15	c__norank_p__MBNT15	o__norank_p__MBNT15	f__norank_p__MBNT15	g__norank_p__MBNT15	s__unclassified_g__norank_p__MBNT15	ASV23531	0	0	0	0	0	0	0	0	0	0	0	0	0	0	0	0	0	1	0	0	0	0	0	0	0	0	0	0	0	0	0	0	0	0	0	0	0	0	0	0	0
d__Bacteria	k__norank_d__Bacteria	p__Firmicutes	c__unclassified_p__Firmicutes	o__unclassified_p__Firmicutes	f__unclassified_p__Firmicutes	g__unclassified_p__Firmicutes	s__unclassified_p__Firmicutes	ASV9280	0	0	0	0	0	0	0	0	0	0	0	0	0	0	0	0	0	0	0	0	0	0	0	0	0	0	0	0	2	0	0	0	0	0	0	0	0	0	0	0	0
d__Bacteria	k__norank_d__Bacteria	p__Chloroflexi	c__Dehalococcoidia	o__MSBL5	f__norank_o__MSBL5	g__norank_o__MSBL5	s__uncultured_Chloroflexi_bacterium_o__MSBL5	ASV96327	0	0	0	0	0	0	0	0	0	0	0	0	0	0	0	0	0	0	0	0	0	0	0	0	0	0	0	0	0	0	0	0	0	0	0	0	0	0	0	0	3
d__Bacteria	k__norank_d__Bacteria	p__Proteobacteria	c__Gammaproteobacteria	o__norank_c__Gammaproteobacteria	f__norank_c__Gammaproteobacteria	g__norank_c__Gammaproteobacteria	s__unclassified_g__norank_c__Gammaproteobacteria	ASV12214	0	0	0	0	0	0	0	0	0	0	0	0	3	0	0	0	0	0	0	0	0	0	0	0	0	0	0	0	0	0	0	0	0	0	0	0	0	0	0	0	0
d__Bacteria	k__norank_d__Bacteria	p__Halanaerobiaeota	c__Halanaerobiia	o__Halanaerobiales	f__Halobacteroidaceae	g__norank_f__Halobacteroidaceae	s__unclassified_g__norank_f__Halobacteroidaceae	ASV32842	0	0	0	0	0	0	0	0	0	0	0	0	0	0	0	0	0	0	0	0	0	0	0	0	0	0	0	0	0	0	0	0	0	0	0	0	0	0	0	0	0
d__Bacteria	k__norank_d__Bacteria	p__Planctomycetota	c__Phycisphaerae	o__Phycisphaerales	f__Phycisphaeraceae	g__Urania-1B-19_marine_sediment_group	s__uncultured_bacterium_g__Urania-1B-19_marine_sediment_group	ASV9544	0	0	0	0	0	0	0	0	0	0	0	0	0	0	0	0	0	0	0	0	0	0	0	0	0	0	0	0	0	3	0	0	0	0	0	0	0	0	0	0	0
d__Bacteria	k__norank_d__Bacteria	p__Acidobacteriota	c__Vicinamibacteria	o__Subgroup_9	f__norank_o__Subgroup_9	g__norank_o__Subgroup_9	s__unclassified_g__norank_o__Subgroup_9	ASV75926	0	0	0	0	0	0	0	0	0	0	0	0	0	0	0	0	0	0	0	0	0	0	0	0	0	0	0	0	0	0	0	0	0	0	0	0	0	0	0	2	0
d__Bacteria	k__norank_d__Bacteria	p__Bacteroidota	c__Bacteroidia	o__Bacteroidales	f__Bacteroidetes_BD2-2	g__norank_f__Bacteroidetes_BD2-2	s__unclassified_g__norank_f__Bacteroidetes_BD2-2	ASV56327	0	1	0	0	0	0	0	0	0	0	0	0	0	0	0	0	0	0	0	0	0	0	0	0	0	0	0	0	0	0	0	0	0	0	0	0	0	0	0	0	0
d__Bacteria	k__norank_d__Bacteria	p__unclassified_k__norank_d__Bacteria	c__unclassified_k__norank_d__Bacteria	o__unclassified_k__norank_d__Bacteria	f__unclassified_k__norank_d__Bacteria	g__unclassified_k__norank_d__Bacteria	s__unclassified_k__norank_d__Bacteria	ASV1761	0	0	0	0	0	0	0	0	0	0	0	0	0	0	0	0	0	0	0	0	0	0	0	0	0	0	0	0	0	0	0	0	0	0	0	0	0	0	0	0	0
d__Bacteria	k__norank_d__Bacteria	p__unclassified_k__norank_d__Bacteria	c__unclassified_k__norank_d__Bacteria	o__unclassified_k__norank_d__Bacteria	f__unclassified_k__norank_d__Bacteria	g__unclassified_k__norank_d__Bacteria	s__unclassified_k__norank_d__Bacteria	ASV83879	0	0	0	0	0	0	0	0	0	0	0	0	0	0	0	0	0	0	0	0	0	0	0	0	0	0	0	0	0	0	1	0	0	0	0	0	0	0	0	0	0
d__Bacteria	k__norank_d__Bacteria	p__Proteobacteria	c__Alphaproteobacteria	o__Rhizobiales	f__Hyphomicrobiaceae	g__Hyphomicrobium	s__uncultured_sludge_bacterium_A27b	ASV41323	0	0	0	0	0	0	0	0	0	0	0	0	0	0	0	0	0	0	0	7	0	0	0	0	0	0	0	0	0	0	0	0	0	0	0	0	0	0	0	0	0
d__Bacteria	k__norank_d__Bacteria	p__SAR324_cladeMarine_group_B	c__norank_p__SAR324_cladeMarine_group_B	o__norank_p__SAR324_cladeMarine_group_B	f__norank_p__SAR324_cladeMarine_group_B	g__norank_p__SAR324_cladeMarine_group_B	s__unclassified_g__norank_p__SAR324_cladeMarine_group_B	ASV23242	0	0	0	0	0	0	0	0	0	0	0	0	0	0	0	0	0	3	0	0	0	0	0	0	0	0	0	0	0	0	0	0	0	0	0	0	0	0	0	0	0
d__Bacteria	k__norank_d__Bacteria	p__Proteobacteria	c__Gammaproteobacteria	o__unclassified_c__Gammaproteobacteria	f__unclassified_c__Gammaproteobacteria	g__unclassified_c__Gammaproteobacteria	s__unclassified_c__Gammaproteobacteria	ASV88114	0	0	0	0	0	0	0	0	0	0	0	0	0	0	0	0	0	0	0	0	0	0	0	2	0	0	0	0	0	0	0	0	0	0	0	0	0	0	0	0	0
d__Bacteria	k__norank_d__Bacteria	p__unclassified_k__norank_d__Bacteria	c__unclassified_k__norank_d__Bacteria	o__unclassified_k__norank_d__Bacteria	f__unclassified_k__norank_d__Bacteria	g__unclassified_k__norank_d__Bacteria	s__unclassified_k__norank_d__Bacteria	ASV1756	0	0	0	0	0	0	0	0	0	0	0	0	0	0	0	0	0	0	0	0	0	0	0	0	0	0	0	0	0	0	0	0	0	0	0	0	0	0	0	0	0
d__Bacteria	k__norank_d__Bacteria	p__Calditrichota	c__Calditrichia	o__Calditrichales	f__Calditrichaceae	g__Calorithrix	s__unclassified_g__Calorithrix	ASV15117	0	0	0	0	0	0	0	5	0	0	0	0	0	0	0	12	0	0	0	0	0	0	0	0	0	0	0	0	0	0	0	0	0	0	0	0	0	0	0	0	0
d__Bacteria	k__norank_d__Bacteria	p__Actinobacteriota	c__Actinobacteria	o__Streptomycetales	f__Streptomycetaceae	g__Streptomyces	s__unclassified_g__Streptomyces	ASV78799	0	0	0	0	0	0	0	0	0	0	0	0	0	0	0	0	0	0	0	0	0	0	0	0	0	0	0	0	0	0	0	1	0	0	0	0	0	0	0	0	0
d__Bacteria	k__norank_d__Bacteria	p__Bacteroidota	c__Bacteroidia	o__Sphingobacteriales	f__unclassified_o__Sphingobacteriales	g__unclassified_o__Sphingobacteriales	s__unclassified_o__Sphingobacteriales	ASV46144	4	0	0	2	9	0	0	0	0	0	0	0	0	0	0	0	0	0	0	0	0	0	0	0	0	0	0	0	0	0	0	0	0	0	0	0	0	0	0	0	0
d__Bacteria	k__norank_d__Bacteria	p__Verrucomicrobiota	c__Verrucomicrobiae	o__Verrucomicrobiales	f__Rubritaleaceae	g__Luteolibacter	s__unclassified_g__Luteolibacter	ASV97158	0	0	0	0	0	0	0	0	0	0	0	0	0	0	0	0	0	0	0	0	0	0	0	0	0	0	0	0	0	0	0	0	0	0	0	0	0	0	0	0	2
d__Bacteria	k__norank_d__Bacteria	p__Chloroflexi	c__Gitt-GS-136	o__norank_c__Gitt-GS-136	f__norank_c__Gitt-GS-136	g__norank_c__Gitt-GS-136	s__uncultured_bacterium_c__Gitt-GS-136	ASV75763	0	0	0	0	0	0	0	0	0	0	0	0	0	0	0	0	0	0	0	0	0	0	0	0	0	0	0	0	0	0	0	0	0	0	0	0	0	0	0	1	0
d__Bacteria	k__norank_d__Bacteria	p__Bdellovibrionota	c__Bdellovibrionia	o__Bdellovibrionales	f__Bdellovibrionaceae	g__OM27_clade	s__uncultured_bacterium_g__OM27_clade	ASV1470	0	0	0	0	0	0	0	0	0	3	0	0	0	0	0	0	0	0	0	0	0	0	0	0	0	0	0	0	0	0	0	0	0	0	0	0	0	0	0	0	0
d__Bacteria	k__norank_d__Bacteria	p__Proteobacteria	c__Alphaproteobacteria	o__Rhodobacterales	f__Rhodobacteraceae	g__unclassified_f__Rhodobacteraceae	s__unclassified_f__Rhodobacteraceae	ASV43176	0	0	0	0	0	0	0	0	0	0	0	0	0	0	0	0	0	0	0	2	0	0	0	0	0	0	0	0	0	0	0	0	0	0	0	0	0	0	0	0	0
d__Bacteria	k__norank_d__Bacteria	p__Acidobacteriota	c__Vicinamibacteria	o__Subgroup_17	f__norank_o__Subgroup_17	g__norank_o__Subgroup_17	s__unclassified_g__norank_o__Subgroup_17	ASV93060	0	0	0	0	0	0	0	0	0	0	0	3	0	0	0	0	0	0	0	0	0	0	0	0	0	0	0	0	0	0	0	0	0	0	0	0	0	0	0	0	0
d__Bacteria	k__norank_d__Bacteria	p__Proteobacteria	c__Gammaproteobacteria	o__unclassified_c__Gammaproteobacteria	f__unclassified_c__Gammaproteobacteria	g__unclassified_c__Gammaproteobacteria	s__unclassified_c__Gammaproteobacteria	ASV16029	0	0	0	0	0	0	0	0	0	0	0	0	0	0	0	0	0	0	0	0	0	0	0	0	0	0	27	0	0	0	0	0	0	0	0	0	0	0	0	0	0
d__Bacteria	k__norank_d__Bacteria	p__Firmicutes	c__Clostridia	o__Peptostreptococcales-Tissierellales	f__Peptostreptococcaceae	g__unclassified_f__Peptostreptococcaceae	s__unclassified_f__Peptostreptococcaceae	ASV94734	0	0	0	0	0	0	0	0	0	0	0	0	0	0	0	0	0	0	0	0	0	0	0	0	0	0	0	0	0	0	0	0	0	0	0	0	0	0	0	0	0
d__Bacteria	k__norank_d__Bacteria	p__Proteobacteria	c__Gammaproteobacteria	o__Run-SP154	f__norank_o__Run-SP154	g__norank_o__Run-SP154	s__uncultured_gamma_proteobacterium_o__Run-SP154	ASV78727	0	0	0	0	0	0	0	0	0	0	0	0	0	0	0	0	0	0	0	0	0	0	0	0	0	0	0	0	0	0	0	3	0	0	0	0	0	0	0	0	0
d__Bacteria	k__norank_d__Bacteria	p__Desulfobacterota	c__Desulfuromonadia	o__norank_c__Desulfuromonadia	f__unclassified_o__norank_c__Desulfuromonadia	g__unclassified_o__norank_c__Desulfuromonadia	s__unclassified_o__norank_c__Desulfuromonadia	ASV3893	0	0	0	0	0	0	0	0	0	0	0	0	15	11	5	0	0	0	0	0	0	0	0	0	0	0	0	0	0	0	0	0	0	0	0	0	0	0	0	0	0
d__Bacteria	k__norank_d__Bacteria	p__Verrucomicrobiota	c__Verrucomicrobiae	o__Verrucomicrobiales	f__Rubritaleaceae	g__Persicirhabdus	s__uncultured_bacterium_g__Persicirhabdus	ASV81980	0	0	0	0	0	0	0	0	0	0	0	0	0	0	0	0	0	0	0	0	0	0	0	0	0	0	0	0	0	0	0	0	0	0	0	0	0	0	5	0	0
d__Bacteria	k__norank_d__Bacteria	p__Myxococcota	c__Polyangia	o__Polyangiales	f__Sandaracinaceae	g__norank_f__Sandaracinaceae	s__unclassified_g__norank_f__Sandaracinaceae	ASV71659	0	0	0	0	0	0	0	0	0	0	2	0	0	0	0	0	0	0	0	0	0	0	0	0	0	0	0	0	0	0	0	0	0	0	0	0	0	0	0	0	0
d__Bacteria	k__norank_d__Bacteria	p__Actinobacteriota	c__Thermoleophilia	o__Gaiellales	f__Gaiellaceae	g__Gaiella	s__unclassified_g__Gaiella	ASV74768	0	0	0	0	0	4	0	0	0	0	0	0	0	0	0	0	0	0	0	0	0	0	0	0	0	0	0	0	0	0	0	0	0	0	0	0	0	0	0	0	0
d__Bacteria	k__norank_d__Bacteria	p__Proteobacteria	c__Alphaproteobacteria	o__Rhizobiales	f__Rhizobiales_Incertae_Sedis	g__Bauldia	s__unclassified_g__Bauldia	ASV14892	26	0	0	0	0	0	0	5	0	0	0	0	0	0	0	0	0	0	0	0	0	0	0	0	0	0	0	0	0	0	0	0	0	0	0	0	0	0	0	0	0
d__Bacteria	k__norank_d__Bacteria	p__Latescibacterota	c__norank_p__Latescibacterota	o__norank_p__Latescibacterota	f__norank_p__Latescibacterota	g__norank_p__Latescibacterota	s__unclassified_g__norank_p__Latescibacterota	ASV26166	0	0	0	0	0	0	0	0	0	0	0	0	0	0	0	0	0	0	0	0	0	4	0	0	5	0	0	0	0	0	0	0	0	0	0	0	0	0	0	0	0
d__Bacteria	k__norank_d__Bacteria	p__Actinobacteriota	c__Thermoleophilia	o__Gaiellales	f__norank_o__Gaiellales	g__norank_o__Gaiellales	s__metagenome_o__Gaiellales	ASV17229	0	0	0	0	0	0	0	0	0	0	0	0	0	0	0	0	0	0	0	0	0	0	0	0	0	0	2	0	0	0	0	0	0	0	0	0	0	0	0	0	0
d__Bacteria	k__norank_d__Bacteria	p__Proteobacteria	c__Gammaproteobacteria	o__Methylococcales	f__Methylococcaceae	g__Methyloparacoccus	s__uncultured_bacterium_g__Methyloparacoccus	ASV34606	0	0	0	0	0	0	0	0	0	0	0	0	0	0	0	0	0	0	0	0	0	0	0	0	0	0	0	0	0	0	0	0	0	0	0	0	0	0	0	0	0
d__Bacteria	k__norank_d__Bacteria	p__Acidobacteriota	c__Vicinamibacteria	o__Subgroup_9	f__norank_o__Subgroup_9	g__norank_o__Subgroup_9	s__uncultured_Acidobacteria_bacterium_o__Subgroup_9	ASV27375	0	0	0	0	0	0	0	0	0	0	0	0	0	0	0	0	0	0	0	0	0	1	0	0	0	0	0	0	0	0	0	0	0	0	0	0	0	0	0	0	0
d__Bacteria	k__norank_d__Bacteria	p__Firmicutes	c__Bacilli	o__Erysipelotrichales	f__Erysipelotrichaceae	g__Turicibacter	s__uncultured_bacterium_g__Turicibacter	ASV53714	0	0	0	0	0	0	0	0	0	0	0	0	0	0	0	0	0	0	0	0	0	0	0	0	0	0	0	0	0	0	0	0	0	0	0	0	0	0	0	0	15
d__Bacteria	k__norank_d__Bacteria	p__TX1A-33	c__norank_p__TX1A-33	o__norank_p__TX1A-33	f__norank_p__TX1A-33	g__norank_p__TX1A-33	s__uncultured_bacterium_p__TX1A-33	ASV23897	0	0	0	0	0	0	0	0	0	0	0	0	0	0	0	0	0	2	0	0	0	0	0	0	0	0	0	0	0	0	0	0	0	0	0	0	0	0	0	0	0
d__Bacteria	k__norank_d__Bacteria	p__Proteobacteria	c__Gammaproteobacteria	o__Vibrionales	f__Vibrionaceae	g__Photobacterium	s__unclassified_g__Photobacterium	ASV21104	0	0	0	0	0	0	0	0	0	0	0	0	0	0	0	0	0	0	0	0	0	0	0	0	0	0	0	0	0	0	0	0	0	0	1	0	0	0	0	0	0
d__Bacteria	k__norank_d__Bacteria	p__Proteobacteria	c__Alphaproteobacteria	o__Alphaproteobacteria_Incertae_Sedis	f__unclassified_o__Alphaproteobacteria_Incertae_Sedis	g__norank_f__unclassified_o__Alphaproteobacteria_Incertae_Sedis	s__uncultured_Alphaproteobacteria_bacterium_f__unclassified_o__Alphaproteobacteria_Incertae_Sedis	ASV21567	13	9	3	0	0	0	0	0	0	0	0	0	0	0	0	27	15	14	0	0	0	5	3	0	0	0	0	0	0	0	0	0	0	0	0	0	0	0	0	0	0
d__Bacteria	k__norank_d__Bacteria	p__unclassified_k__norank_d__Bacteria	c__unclassified_k__norank_d__Bacteria	o__unclassified_k__norank_d__Bacteria	f__unclassified_k__norank_d__Bacteria	g__unclassified_k__norank_d__Bacteria	s__unclassified_k__norank_d__Bacteria	ASV76123	0	0	0	0	0	0	0	0	0	0	0	0	0	0	0	0	0	0	0	0	0	0	0	0	0	0	0	0	0	0	0	0	0	0	0	0	0	0	0	2	0
d__Bacteria	k__norank_d__Bacteria	p__Bacteroidota	c__Bacteroidia	o__Chitinophagales	f__Saprospiraceae	g__norank_f__Saprospiraceae	s__unclassified_g__norank_f__Saprospiraceae	ASV101668	0	0	0	0	0	0	0	0	0	0	0	0	0	0	0	0	2	0	0	0	0	0	0	0	0	0	0	0	0	0	0	0	0	0	0	0	0	0	0	0	0
d__Bacteria	k__norank_d__Bacteria	p__Myxococcota	c__Polyangia	o__Polyangiales	f__Sandaracinaceae	g__norank_f__Sandaracinaceae	s__uncultured_delta_proteobacterium_f__Sandaracinaceae	ASV13110	0	0	0	0	0	0	0	0	0	0	0	0	2	0	0	0	0	0	0	0	0	0	0	0	0	0	0	0	0	0	0	0	0	0	0	0	0	0	0	0	0
d__Bacteria	k__norank_d__Bacteria	p__Desulfobacterota	c__Desulfobacteria	o__Desulfatiglandales	f__Desulfatiglandaceae	g__Desulfatiglans	s__unclassified_g__Desulfatiglans	ASV23696	0	0	0	0	0	0	0	0	0	0	0	0	0	0	0	1	3	2	0	0	0	0	0	0	0	0	0	0	0	0	0	0	0	0	0	0	0	0	0	0	0
d__Bacteria	k__norank_d__Bacteria	p__Bacteroidota	c__Bacteroidia	o__Chitinophagales	f__Saprospiraceae	g__norank_f__Saprospiraceae	s__unclassified_g__norank_f__Saprospiraceae	ASV58067	0	0	0	0	0	0	0	0	0	0	0	0	0	0	0	0	0	0	0	0	0	0	0	0	0	0	0	0	0	0	0	0	2	0	0	0	0	0	0	0	0
d__Bacteria	k__norank_d__Bacteria	p__Proteobacteria	c__Gammaproteobacteria	o__B2M28	f__norank_o__B2M28	g__norank_o__B2M28	s__uncultured_gamma_proteobacterium_o__B2M28	ASV19573	0	0	0	0	0	0	0	0	0	0	0	0	0	0	0	0	0	0	0	0	0	0	0	0	0	0	0	0	0	0	76	57	58	11	16	15	0	0	0	0	0
d__Bacteria	k__norank_d__Bacteria	p__Actinobacteriota	c__Actinobacteria	o__Corynebacteriales	f__Mycobacteriaceae	g__Mycobacterium	s__unclassified_g__Mycobacterium	ASV72006	0	0	0	0	0	0	0	0	0	0	1	0	0	0	0	0	0	0	0	0	0	0	0	0	0	0	0	0	0	0	0	0	0	0	0	0	0	0	0	0	0
d__Bacteria	k__norank_d__Bacteria	p__Planctomycetota	c__OM190	o__norank_c__OM190	f__norank_c__OM190	g__norank_c__OM190	s__unclassified_g__norank_c__OM190	ASV36360	0	0	0	0	0	0	0	0	0	0	0	0	0	0	0	0	0	0	0	0	0	0	0	0	0	0	0	2	0	0	0	0	0	0	0	0	0	0	0	0	0
d__Bacteria	k__norank_d__Bacteria	p__Proteobacteria	c__Gammaproteobacteria	o__Oceanospirillales	f__Nitrincolaceae	g__Neptunomonas	s__Neptunomonas_japonica	ASV91936	0	0	0	0	0	0	0	0	0	0	0	0	0	0	0	0	0	0	0	0	2	0	0	0	0	0	0	0	0	0	0	0	0	0	0	0	0	0	0	0	0
d__Bacteria	k__norank_d__Bacteria	p__Actinobacteriota	c__Actinobacteria	o__unclassified_c__Actinobacteria	f__unclassified_c__Actinobacteria	g__unclassified_c__Actinobacteria	s__unclassified_c__Actinobacteria	ASV30907	0	0	0	0	0	0	0	0	0	0	0	0	0	0	0	0	0	0	0	0	0	0	2	0	0	0	0	0	0	0	0	0	0	0	0	0	0	0	0	0	0
d__Bacteria	k__norank_d__Bacteria	p__Proteobacteria	c__Gammaproteobacteria	o__Granulosicoccales	f__Granulosicoccaceae	g__Granulosicoccus	s__uncultured_bacterium_g__Granulosicoccus	ASV36639	0	0	0	0	0	0	0	0	0	0	0	0	0	0	0	0	0	0	0	0	0	0	0	0	0	0	0	2	0	0	0	0	0	0	0	0	0	0	0	0	0
d__Bacteria	k__norank_d__Bacteria	p__Planctomycetota	c__Phycisphaerae	o__Phycisphaerales	f__AKAU3564_sediment_group	g__norank_f__AKAU3564_sediment_group	s__uncultured_bacterium_f__AKAU3564_sediment_group	ASV68411	0	0	0	0	0	0	0	0	0	0	0	0	0	0	0	3	0	0	0	0	0	0	0	0	0	0	0	0	0	0	0	0	0	0	0	0	0	0	0	0	0
d__Bacteria	k__norank_d__Bacteria	p__Verrucomicrobiota	c__Chlamydiae	o__Chlamydiales	f__unclassified_o__Chlamydiales	g__unclassified_o__Chlamydiales	s__unclassified_o__Chlamydiales	ASV36846	0	0	0	0	0	0	0	0	0	0	0	0	0	0	0	0	0	0	0	0	0	0	0	0	0	0	0	1	0	0	0	0	0	0	0	0	0	0	0	0	0
d__Bacteria	k__norank_d__Bacteria	p__Chloroflexi	c__Anaerolineae	o__Anaerolineales	f__Anaerolineaceae	g__norank_f__Anaerolineaceae	s__unclassified_g__norank_f__Anaerolineaceae	ASV55705	0	10	0	0	0	0	0	0	0	0	0	0	0	0	0	0	0	0	0	0	0	0	0	0	0	0	0	0	0	0	0	0	0	0	0	0	0	0	0	0	0
d__Bacteria	k__norank_d__Bacteria	p__unclassified_k__norank_d__Bacteria	c__unclassified_k__norank_d__Bacteria	o__unclassified_k__norank_d__Bacteria	f__unclassified_k__norank_d__Bacteria	g__unclassified_k__norank_d__Bacteria	s__unclassified_k__norank_d__Bacteria	ASV77427	0	0	0	0	0	0	0	0	0	0	0	0	0	0	0	0	0	0	0	0	0	0	0	0	0	0	0	0	0	0	0	0	0	0	0	0	0	0	0	0	0
d__Bacteria	k__norank_d__Bacteria	p__Bacteroidota	c__Bacteroidia	o__Bacteroidales	f__unclassified_o__Bacteroidales	g__unclassified_o__Bacteroidales	s__unclassified_o__Bacteroidales	ASV39319	0	0	0	0	0	0	0	0	0	0	0	0	0	0	0	0	0	0	2	0	0	0	0	0	0	0	0	0	0	0	0	0	0	0	0	0	0	0	0	0	0
d__Bacteria	k__norank_d__Bacteria	p__Chloroflexi	c__Anaerolineae	o__unclassified_c__Anaerolineae	f__unclassified_c__Anaerolineae	g__unclassified_c__Anaerolineae	s__unclassified_c__Anaerolineae	ASV57883	0	0	0	0	0	0	0	0	0	0	0	0	0	0	0	0	0	0	0	0	0	0	0	0	0	0	0	0	0	0	0	4	4	0	0	0	0	0	0	0	0
d__Bacteria	k__norank_d__Bacteria	p__Proteobacteria	c__Gammaproteobacteria	o__EPR3968-O8a-Bc78	f__norank_o__EPR3968-O8a-Bc78	g__norank_o__EPR3968-O8a-Bc78	s__unclassified_g__norank_o__EPR3968-O8a-Bc78	ASV55945	0	3	0	0	0	0	0	0	0	0	0	0	0	0	0	0	0	0	0	0	0	0	0	0	0	0	0	0	0	0	0	0	0	0	0	0	0	0	0	0	0
d__Bacteria	k__norank_d__Bacteria	p__Verrucomicrobiota	c__Chlamydiae	o__Chlamydiales	f__Parachlamydiaceae	g__Neochlamydia	s__uncultured_bacterium_g__Neochlamydia	ASV14932	0	0	0	0	0	0	0	6	0	0	0	0	0	0	0	0	0	0	0	0	0	0	0	0	0	0	0	0	0	0	0	0	0	0	0	0	0	0	0	0	0
d__Bacteria	k__norank_d__Bacteria	p__unclassified_k__norank_d__Bacteria	c__unclassified_k__norank_d__Bacteria	o__unclassified_k__norank_d__Bacteria	f__unclassified_k__norank_d__Bacteria	g__unclassified_k__norank_d__Bacteria	s__unclassified_k__norank_d__Bacteria	ASV99552	0	0	0	0	0	0	0	0	0	0	0	0	0	0	0	0	3	0	0	0	0	0	0	0	0	0	0	0	0	0	0	0	0	0	0	0	0	0	0	0	0
d__Bacteria	k__norank_d__Bacteria	p__Patescibacteria	c__Kazania	o__norank_c__Kazania	f__norank_c__Kazania	g__norank_c__Kazania	s__uncultured_bacterium_c__Kazania	ASV56125	0	1	0	0	0	0	0	0	0	0	0	0	0	0	0	0	0	0	0	0	0	0	0	0	0	0	0	0	0	0	0	0	0	0	0	0	0	0	0	0	0
d__Bacteria	k__norank_d__Bacteria	p__Proteobacteria	c__Gammaproteobacteria	o__unclassified_c__Gammaproteobacteria	f__unclassified_c__Gammaproteobacteria	g__unclassified_c__Gammaproteobacteria	s__unclassified_c__Gammaproteobacteria	ASV13358	0	0	0	0	0	0	0	0	0	0	0	0	2	0	0	0	0	0	0	0	0	0	0	0	0	0	0	0	0	0	0	0	0	0	0	0	0	0	0	0	0
d__Bacteria	k__norank_d__Bacteria	p__Proteobacteria	c__Gammaproteobacteria	o__Methylococcales	f__Methylococcaceae	g__unclassified_f__Methylococcaceae	s__unclassified_f__Methylococcaceae	ASV6556	0	0	0	0	0	0	0	0	0	0	0	0	0	0	2	0	0	0	0	0	0	0	0	0	0	0	0	0	0	0	0	0	0	0	0	0	0	0	0	0	0
d__Bacteria	k__norank_d__Bacteria	p__unclassified_k__norank_d__Bacteria	c__unclassified_k__norank_d__Bacteria	o__unclassified_k__norank_d__Bacteria	f__unclassified_k__norank_d__Bacteria	g__unclassified_k__norank_d__Bacteria	s__unclassified_k__norank_d__Bacteria	ASV30334	0	0	0	0	0	0	0	0	0	0	0	0	0	0	0	0	0	0	0	0	0	0	1	0	0	0	0	0	0	0	0	0	0	0	0	0	0	0	0	0	0
d__Bacteria	k__norank_d__Bacteria	p__unclassified_k__norank_d__Bacteria	c__unclassified_k__norank_d__Bacteria	o__unclassified_k__norank_d__Bacteria	f__unclassified_k__norank_d__Bacteria	g__unclassified_k__norank_d__Bacteria	s__unclassified_k__norank_d__Bacteria	ASV69258	0	0	0	0	0	0	0	0	0	0	0	0	0	0	0	1	0	0	0	0	0	0	0	0	0	0	0	0	0	0	0	0	0	0	0	0	0	0	0	0	0
d__Bacteria	k__norank_d__Bacteria	p__Desulfobacterota	c__Desulfobacteria	o__Desulfatiglandales	f__Desulfatiglandaceae	g__Desulfatiglans	s__unclassified_g__Desulfatiglans	ASV47541	0	0	0	0	0	0	0	0	8	0	0	0	0	0	0	0	0	0	0	0	0	0	0	0	0	0	0	0	0	0	0	0	0	0	0	0	0	0	0	0	0
d__Bacteria	k__norank_d__Bacteria	p__Proteobacteria	c__Alphaproteobacteria	o__Rhizobiales	f__Rhizobiales_Incertae_Sedis	g__Bauldia	s__unclassified_g__Bauldia	ASV43344	0	0	0	0	0	0	16	0	0	0	0	0	0	0	0	0	0	0	0	0	0	0	0	0	0	0	0	0	0	0	0	0	0	0	0	0	0	0	0	0	0
d__Bacteria	k__norank_d__Bacteria	p__Proteobacteria	c__Gammaproteobacteria	o__Cellvibrionales	f__Porticoccaceae	g__C1-B045	s__unclassified_g__C1-B045	ASV52107	3	0	0	0	0	0	0	0	0	0	0	0	0	0	0	3	0	0	0	0	8	0	0	0	0	0	0	0	0	0	0	0	0	0	0	0	0	0	0	0	0
d__Bacteria	k__norank_d__Bacteria	p__Proteobacteria	c__Gammaproteobacteria	o__unclassified_c__Gammaproteobacteria	f__unclassified_c__Gammaproteobacteria	g__unclassified_c__Gammaproteobacteria	s__unclassified_c__Gammaproteobacteria	ASV89439	0	0	0	0	0	0	0	0	0	0	0	0	0	0	0	0	0	0	0	0	0	0	0	0	0	0	0	0	0	0	0	0	0	0	0	0	0	0	0	0	0
d__Bacteria	k__norank_d__Bacteria	p__Proteobacteria	c__Gammaproteobacteria	o__Steroidobacterales	f__Steroidobacteraceae	g__unclassified_f__Steroidobacteraceae	s__unclassified_f__Steroidobacteraceae	ASV6417	0	0	0	0	0	0	0	0	0	0	0	0	0	0	2	0	0	0	0	0	0	0	0	0	0	0	0	0	0	0	0	0	0	0	0	0	0	0	0	0	0
d__Bacteria	k__norank_d__Bacteria	p__Myxococcota	c__Myxococcia	o__Myxococcales	f__Myxococcaceae	g__P3OB-42	s__unclassified_g__P3OB-42	ASV58679	0	0	0	0	0	0	0	0	0	0	0	0	0	0	0	0	0	0	0	0	0	0	0	0	0	0	0	0	0	0	0	0	2	0	0	0	0	0	0	0	0
d__Bacteria	k__norank_d__Bacteria	p__Proteobacteria	c__Gammaproteobacteria	o__Steroidobacterales	f__Woeseiaceae	g__Woeseia	s__unclassified_g__Woeseia	ASV27615	0	0	0	0	0	0	0	0	0	0	0	0	0	0	0	0	0	0	0	0	0	0	0	0	0	0	0	0	0	0	15	0	0	13	0	0	0	0	0	0	0
d__Bacteria	k__norank_d__Bacteria	p__Acidobacteriota	c__Thermoanaerobaculia	o__Thermoanaerobaculales	f__Thermoanaerobaculaceae	g__Subgroup_10	s__uncultured_bacterium_g__Subgroup_10	ASV13548	0	0	0	0	0	0	0	0	0	0	0	0	2	0	0	0	0	0	0	0	0	0	0	0	0	0	0	0	0	0	0	0	0	0	0	0	0	0	0	0	0
d__Bacteria	k__norank_d__Bacteria	p__Desulfobacterota	c__Desulfobacteria	o__Desulfobacterales	f__unclassified_o__Desulfobacterales	g__unclassified_o__Desulfobacterales	s__unclassified_o__Desulfobacterales	ASV96995	0	0	0	0	0	0	0	0	0	0	0	0	0	0	0	0	0	0	0	0	0	0	0	0	0	0	0	0	0	0	0	0	0	0	0	0	0	0	0	0	1
d__Bacteria	k__norank_d__Bacteria	p__Proteobacteria	c__Alphaproteobacteria	o__Rhizobiales	f__Rhizobiales_Incertae_Sedis	g__norank_f__Rhizobiales_Incertae_Sedis	s__unclassified_g__norank_f__Rhizobiales_Incertae_Sedis	ASV2706	0	0	0	0	0	0	0	0	0	0	0	0	0	0	0	0	0	0	0	0	0	0	0	0	0	0	0	0	0	0	0	0	0	0	0	0	0	0	0	0	0
d__Bacteria	k__norank_d__Bacteria	p__Acidobacteriota	c__Acidobacteriae	o__Acidobacteriales	f__Acidobacteriaceae_Subgroup_1	g__Acidobacterium	s__uncultured_bacterium_g__Acidobacterium	ASV33106	0	0	0	0	0	0	0	0	0	0	0	0	0	0	0	0	0	0	0	0	0	0	0	0	0	0	0	0	0	0	0	0	0	0	0	0	0	0	0	0	0
d__Bacteria	k__norank_d__Bacteria	p__Proteobacteria	c__Gammaproteobacteria	o__Steroidobacterales	f__Woeseiaceae	g__Woeseia	s__unclassified_g__Woeseia	ASV90567	0	0	0	0	0	0	0	0	0	0	0	0	0	0	0	0	0	0	0	0	4	0	0	0	0	0	0	0	0	0	0	0	0	0	0	0	0	0	0	0	0
d__Bacteria	k__norank_d__Bacteria	p__Proteobacteria	c__Gammaproteobacteria	o__Burkholderiales	f__unclassified_o__Burkholderiales	g__unclassified_o__Burkholderiales	s__unclassified_o__Burkholderiales	ASV6787	0	0	0	0	0	0	0	0	0	0	0	0	0	0	2	0	0	0	0	0	0	0	0	0	0	0	0	0	0	0	0	0	0	0	0	0	0	0	0	0	0
d__Bacteria	k__norank_d__Bacteria	p__Nitrospinota	c__P9X2b3D02	o__norank_c__P9X2b3D02	f__norank_c__P9X2b3D02	g__norank_c__P9X2b3D02	s__uncultured_prokaryote_c__P9X2b3D02	ASV11101	0	0	0	0	0	0	0	0	0	0	10	0	7	0	0	0	0	0	0	0	0	0	0	0	0	0	0	0	0	0	0	0	0	0	0	0	0	0	0	0	0
d__Bacteria	k__norank_d__Bacteria	p__unclassified_k__norank_d__Bacteria	c__unclassified_k__norank_d__Bacteria	o__unclassified_k__norank_d__Bacteria	f__unclassified_k__norank_d__Bacteria	g__unclassified_k__norank_d__Bacteria	s__unclassified_k__norank_d__Bacteria	ASV33459	0	0	0	0	0	0	0	0	0	0	0	0	0	0	0	0	0	0	0	0	0	0	0	0	0	0	0	0	0	0	0	0	0	0	0	0	0	0	0	0	0
d__Bacteria	k__norank_d__Bacteria	p__Planctomycetota	c__Pla3_lineage	o__norank_c__Pla3_lineage	f__norank_c__Pla3_lineage	g__norank_c__Pla3_lineage	s__unidentified_marine_bacterioplankton_c__Pla3_lineage	ASV94837	0	0	0	0	0	0	0	0	0	0	0	0	0	0	0	0	0	0	0	0	0	0	0	0	0	0	0	0	0	0	0	0	0	0	0	0	0	0	0	0	0
d__Bacteria	k__norank_d__Bacteria	p__Firmicutes	c__Clostridia	o__unclassified_c__Clostridia	f__unclassified_c__Clostridia	g__unclassified_c__Clostridia	s__unclassified_c__Clostridia	ASV96506	0	0	0	0	0	0	0	0	0	0	0	0	0	0	0	0	0	0	0	0	0	0	0	0	0	0	0	0	0	0	0	0	0	0	0	0	0	0	0	0	1
d__Bacteria	k__norank_d__Bacteria	p__Proteobacteria	c__Gammaproteobacteria	o__unclassified_c__Gammaproteobacteria	f__unclassified_c__Gammaproteobacteria	g__unclassified_c__Gammaproteobacteria	s__unclassified_c__Gammaproteobacteria	ASV57627	0	0	0	0	0	0	0	0	0	0	0	0	0	0	0	0	0	0	0	0	0	0	0	0	0	0	0	0	0	0	0	0	4	0	0	0	0	0	0	0	0
d__Bacteria	k__norank_d__Bacteria	p__Desulfobacterota	c__Desulfobacteria	o__Desulfobacterales	f__Desulfosarcinaceae	g__norank_f__Desulfosarcinaceae	s__unclassified_g__norank_f__Desulfosarcinaceae	ASV33113	0	0	0	0	0	0	0	0	0	0	0	0	0	0	0	0	0	0	0	0	0	0	0	0	0	0	0	0	0	0	0	0	0	0	0	0	0	0	0	0	0
d__Bacteria	k__norank_d__Bacteria	p__Patescibacteria	c__Saccharimonadia	o__Saccharimonadales	f__unclassified_o__Saccharimonadales	g__unclassified_o__Saccharimonadales	s__unclassified_o__Saccharimonadales	ASV44612	0	0	0	0	0	0	2	0	0	0	0	0	0	0	0	0	0	0	0	0	0	0	0	0	0	0	0	0	0	0	0	0	0	0	0	0	0	0	0	0	0
d__Bacteria	k__norank_d__Bacteria	p__unclassified_k__norank_d__Bacteria	c__unclassified_k__norank_d__Bacteria	o__unclassified_k__norank_d__Bacteria	f__unclassified_k__norank_d__Bacteria	g__unclassified_k__norank_d__Bacteria	s__unclassified_k__norank_d__Bacteria	ASV77095	0	0	0	0	0	0	0	0	0	0	0	0	0	0	0	0	0	0	0	0	0	0	0	0	0	0	0	0	0	0	0	0	0	0	0	0	0	0	0	0	0
d__Bacteria	k__norank_d__Bacteria	p__Proteobacteria	c__Alphaproteobacteria	o__Rhizobiales	f__Hyphomicrobiaceae	g__unclassified_f__Hyphomicrobiaceae	s__unclassified_f__Hyphomicrobiaceae	ASV21348	0	0	40	0	47	0	0	0	0	0	0	0	0	0	0	0	0	36	35	0	0	0	0	0	0	0	0	0	0	0	0	0	0	0	0	0	0	0	0	0	0
d__Bacteria	k__norank_d__Bacteria	p__unclassified_k__norank_d__Bacteria	c__unclassified_k__norank_d__Bacteria	o__unclassified_k__norank_d__Bacteria	f__unclassified_k__norank_d__Bacteria	g__unclassified_k__norank_d__Bacteria	s__unclassified_k__norank_d__Bacteria	ASV18796	0	0	0	0	0	0	0	0	0	0	0	0	0	0	0	0	0	0	0	0	0	0	0	0	0	0	1	0	0	0	0	0	0	0	0	0	0	0	0	0	0
d__Bacteria	k__norank_d__Bacteria	p__Nitrospinota	c__P9X2b3D02	o__norank_c__P9X2b3D02	f__norank_c__P9X2b3D02	g__norank_c__P9X2b3D02	s__uncultured_prokaryote_c__P9X2b3D02	ASV986	0	0	0	0	0	0	10	0	0	0	0	0	0	0	0	0	0	0	0	0	0	0	0	0	0	0	0	0	0	0	0	0	0	0	0	0	0	0	0	0	0
d__Bacteria	k__norank_d__Bacteria	p__Patescibacteria	c__Parcubacteria	o__Candidatus_Yanofskybacteria	f__norank_o__Candidatus_Yanofskybacteria	g__norank_o__Candidatus_Yanofskybacteria	s__uncultured_deep-sea_bacterium_o__Candidatus_Yanofskybacteria	ASV82816	0	0	0	0	0	0	0	0	0	0	0	0	0	0	0	0	0	0	0	0	0	0	0	0	0	0	0	0	0	0	0	0	0	0	0	0	0	0	1	0	0
d__Bacteria	k__norank_d__Bacteria	p__Acidobacteriota	c__Vicinamibacteria	o__Subgroup_17	f__norank_o__Subgroup_17	g__norank_o__Subgroup_17	s__uncultured_bacterium_o__Subgroup_17	ASV79808	0	0	0	0	0	0	0	0	0	0	0	0	0	0	0	0	0	0	0	0	0	0	0	0	0	0	0	0	0	15	0	0	0	0	0	0	0	0	0	0	0
d__Bacteria	k__norank_d__Bacteria	p__Bacteroidota	c__Bacteroidia	o__Flavobacteriales	f__Flavobacteriaceae	g__Flavobacterium	s__unclassified_g__Flavobacterium	ASV10830	0	0	0	0	0	0	0	0	0	0	0	0	10	0	0	0	0	0	0	0	0	0	0	0	0	0	0	0	0	0	0	0	0	0	0	0	0	0	0	0	0
d__Bacteria	k__norank_d__Bacteria	p__Proteobacteria	c__Gammaproteobacteria	o__Methylococcales	f__Methylomonadaceae	g__unclassified_f__Methylomonadaceae	s__unclassified_f__Methylomonadaceae	ASV7165	0	0	0	0	0	0	0	0	0	0	0	0	0	0	1	0	0	0	0	0	0	0	0	0	0	0	0	0	0	0	0	0	0	0	0	0	0	0	0	0	0
d__Bacteria	k__norank_d__Bacteria	p__Acidobacteriota	c__Thermoanaerobaculia	o__Thermoanaerobaculales	f__Thermoanaerobaculaceae	g__Subgroup_10	s__uncultured_delta_proteobacterium_g__Subgroup_10	ASV82337	0	0	0	0	0	0	0	0	0	0	0	0	0	0	0	0	0	0	0	0	0	0	0	0	0	0	0	0	0	0	0	0	0	0	0	0	0	0	1	0	0
d__Bacteria	k__norank_d__Bacteria	p__Proteobacteria	c__Gammaproteobacteria	o__unclassified_c__Gammaproteobacteria	f__unclassified_c__Gammaproteobacteria	g__unclassified_c__Gammaproteobacteria	s__unclassified_c__Gammaproteobacteria	ASV12892	0	0	0	0	0	0	0	0	0	0	0	0	1	0	0	0	0	0	0	0	0	0	0	0	0	0	0	0	0	0	0	0	0	0	0	0	0	0	0	0	0
d__Bacteria	k__norank_d__Bacteria	p__Proteobacteria	c__Alphaproteobacteria	o__Kiloniellales	f__Kiloniellaceae	g__norank_f__Kiloniellaceae	s__unclassified_g__norank_f__Kiloniellaceae	ASV90025	0	0	0	0	0	0	0	0	0	0	0	0	0	0	0	0	0	0	0	0	8	0	0	0	0	0	0	0	0	0	0	0	0	0	0	0	0	0	0	0	0
d__Bacteria	k__norank_d__Bacteria	p__unclassified_k__norank_d__Bacteria	c__unclassified_k__norank_d__Bacteria	o__unclassified_k__norank_d__Bacteria	f__unclassified_k__norank_d__Bacteria	g__unclassified_k__norank_d__Bacteria	s__unclassified_k__norank_d__Bacteria	ASV66517	0	0	2	0	0	0	0	0	0	0	0	0	0	0	0	0	0	0	0	0	0	0	0	0	0	0	0	0	0	0	0	0	0	0	0	0	0	0	0	0	0
d__Bacteria	k__norank_d__Bacteria	p__Gemmatimonadota	c__BD2-11_terrestrial_group	o__norank_c__BD2-11_terrestrial_group	f__norank_c__BD2-11_terrestrial_group	g__norank_c__BD2-11_terrestrial_group	s__uncultured_bacterium_c__BD2-11_terrestrial_group	ASV28604	0	0	0	0	0	0	0	0	0	0	0	0	0	0	0	0	0	0	0	0	0	0	0	0	0	0	0	0	0	0	0	0	0	1	0	0	0	0	0	0	0
d__Bacteria	k__norank_d__Bacteria	p__Acidobacteriota	c__Subgroup_22	o__norank_c__Subgroup_22	f__norank_c__Subgroup_22	g__norank_c__Subgroup_22	s__unclassified_g__norank_c__Subgroup_22	ASV81545	0	0	0	0	0	0	0	0	0	0	0	0	0	0	0	0	0	0	0	0	0	0	0	0	0	0	0	0	0	2	0	0	0	0	0	0	0	0	0	0	0
d__Bacteria	k__norank_d__Bacteria	p__Gemmatimonadota	c__Gemmatimonadetes	o__Gemmatimonadales	f__Gemmatimonadaceae	g__norank_f__Gemmatimonadaceae	s__unclassified_g__norank_f__Gemmatimonadaceae	ASV23959	0	0	0	0	0	0	0	0	0	0	0	0	0	0	0	0	0	1	0	0	0	0	0	0	0	0	0	0	0	0	0	0	0	0	0	0	0	0	0	0	0
d__Bacteria	k__norank_d__Bacteria	p__Myxococcota	c__Polyangia	o__Blfdi19	f__norank_o__Blfdi19	g__norank_o__Blfdi19	s__uncultured_bacterium_o__Blfdi19	ASV67532	0	0	0	0	0	0	0	0	0	0	0	0	0	0	0	4	0	0	0	0	0	0	0	0	0	0	0	0	0	0	0	0	0	0	0	0	0	0	0	0	0
d__Bacteria	k__norank_d__Bacteria	p__Myxococcota	c__Polyangia	o__Haliangiales	f__Haliangiaceae	g__Haliangium	s__unclassified_g__Haliangium	ASV29261	0	0	0	0	0	0	0	0	0	0	0	0	0	0	0	0	0	0	0	0	0	0	7	0	0	0	0	0	0	0	0	0	0	0	0	0	0	0	0	0	0
d__Bacteria	k__norank_d__Bacteria	p__Firmicutes	c__Clostridia	o__Lachnospirales	f__Defluviitaleaceae	g__Defluviitaleaceae_UCG-011	s__uncultured_bacterium_g__Defluviitaleaceae_UCG-011	ASV66272	0	0	2	0	0	0	0	0	0	0	0	0	0	0	0	0	0	0	0	0	0	0	0	0	0	0	0	0	0	0	0	0	0	0	0	0	0	0	0	0	0
d__Bacteria	k__norank_d__Bacteria	p__Latescibacterota	c__norank_p__Latescibacterota	o__norank_p__Latescibacterota	f__norank_p__Latescibacterota	g__norank_p__Latescibacterota	s__unclassified_g__norank_p__Latescibacterota	ASV27251	0	0	0	0	0	0	0	0	0	0	0	0	0	0	0	0	0	0	0	0	0	1	0	0	0	0	0	0	0	0	0	0	0	0	0	0	0	0	0	0	0
d__Bacteria	k__norank_d__Bacteria	p__Actinobacteriota	c__Actinobacteria	o__Corynebacteriales	f__Mycobacteriaceae	g__Mycobacterium	s__unclassified_g__Mycobacterium	ASV10312	0	0	0	0	0	0	0	0	0	0	0	0	0	0	0	0	0	0	0	0	0	0	0	0	0	0	0	0	1	0	0	0	0	0	0	0	0	0	0	0	0
d__Bacteria	k__norank_d__Bacteria	p__Proteobacteria	c__Gammaproteobacteria	o__Cellvibrionales	f__Halieaceae	g__Pseudohaliea	s__unclassified_g__Pseudohaliea	ASV98321	0	0	0	0	0	0	0	0	0	0	0	0	0	0	0	0	0	0	0	0	0	0	0	0	2	0	0	0	0	0	0	0	0	0	0	0	0	0	0	0	0
d__Bacteria	k__norank_d__Bacteria	p__Acidobacteriota	c__Acidobacteriae	o__PAUC26f	f__norank_o__PAUC26f	g__norank_o__PAUC26f	s__uncultured_Acidobacteriales_bacterium_o__PAUC26f	ASV6643	0	0	0	0	0	0	0	0	0	0	0	0	0	0	1	0	0	0	0	0	0	0	0	0	0	0	0	0	0	0	0	0	0	0	0	0	0	0	0	0	0
d__Bacteria	k__norank_d__Bacteria	p__Bacteroidota	c__Bacteroidia	o__Chitinophagales	f__Saprospiraceae	g__norank_f__Saprospiraceae	s__unclassified_g__norank_f__Saprospiraceae	ASV67870	0	0	0	0	0	0	0	0	0	0	0	0	0	0	0	3	0	0	0	0	0	0	0	0	0	0	0	0	0	0	0	0	0	0	0	0	0	0	0	0	0
d__Bacteria	k__norank_d__Bacteria	p__Proteobacteria	c__Alphaproteobacteria	o__Rhodobacterales	f__Rhodobacteraceae	g__unclassified_f__Rhodobacteraceae	s__unclassified_f__Rhodobacteraceae	ASV71731	0	0	0	0	0	0	0	0	0	0	1	0	0	0	0	0	0	0	0	0	0	0	0	0	0	0	0	0	0	0	0	0	0	0	0	0	0	0	0	0	0
d__Bacteria	k__norank_d__Bacteria	p__Actinobacteriota	c__Acidimicrobiia	o__Microtrichales	f__Microtrichaceae	g__Sva0996_marine_group	s__unclassified_g__Sva0996_marine_group	ASV3043	0	0	0	0	0	0	0	0	0	11	22	0	0	0	21	0	0	0	0	0	0	0	0	0	0	0	0	0	0	0	0	0	0	0	0	0	0	0	0	0	0
d__Bacteria	k__norank_d__Bacteria	p__Acidobacteriota	c__AT-s3-28	o__norank_c__AT-s3-28	f__norank_c__AT-s3-28	g__norank_c__AT-s3-28	s__uncultured_bacterium_c__AT-s3-28	ASV3884	0	0	0	0	0	0	0	0	0	0	0	0	0	0	5	0	0	0	0	0	0	0	0	0	0	0	0	0	0	0	0	0	0	0	0	0	0	0	0	0	0
d__Bacteria	k__norank_d__Bacteria	p__Bacteroidota	c__Bacteroidia	o__Chitinophagales	f__Saprospiraceae	g__norank_f__Saprospiraceae	s__unclassified_g__norank_f__Saprospiraceae	ASV98672	0	0	0	0	0	0	0	0	0	0	0	0	0	0	0	0	7	0	0	0	0	0	0	0	0	0	0	0	0	0	0	0	0	0	0	0	0	0	0	0	0
d__Bacteria	k__norank_d__Bacteria	p__unclassified_k__norank_d__Bacteria	c__unclassified_k__norank_d__Bacteria	o__unclassified_k__norank_d__Bacteria	f__unclassified_k__norank_d__Bacteria	g__unclassified_k__norank_d__Bacteria	s__unclassified_k__norank_d__Bacteria	ASV26966	0	0	0	0	0	0	0	0	0	0	0	0	0	0	0	0	0	0	0	0	0	1	0	0	0	0	0	0	0	0	0	0	0	0	0	0	0	0	0	0	0
d__Bacteria	k__norank_d__Bacteria	p__Chloroflexi	c__Anaerolineae	o__SBR1031	f__norank_o__SBR1031	g__norank_o__SBR1031	s__unclassified_g__norank_o__SBR1031	ASV67395	0	0	0	0	0	0	0	0	0	0	0	0	0	0	0	8	0	0	0	0	0	0	0	0	0	0	0	0	0	0	0	0	0	0	0	0	0	0	0	0	0
d__Bacteria	k__norank_d__Bacteria	p__Bacteroidota	c__Bacteroidia	o__Flavobacteriales	f__Flavobacteriaceae	g__unclassified_f__Flavobacteriaceae	s__unclassified_f__Flavobacteriaceae	ASV8631	0	0	0	0	0	0	0	0	0	0	0	0	0	0	0	0	0	0	0	0	0	6	3	0	0	2	0	13	3	0	0	0	0	0	2	0	0	0	0	0	0
d__Bacteria	k__norank_d__Bacteria	p__Acidobacteriota	c__Acidobacteriae	o__unclassified_c__Acidobacteriae	f__unclassified_c__Acidobacteriae	g__unclassified_c__Acidobacteriae	s__unclassified_c__Acidobacteriae	ASV3892	0	0	0	0	0	0	0	0	0	0	0	3	0	0	8	0	0	0	0	0	0	0	0	0	0	0	0	0	0	0	0	0	0	0	0	0	0	0	0	0	0
d__Bacteria	k__norank_d__Bacteria	p__Bacteroidota	c__Bacteroidia	o__Cytophagales	f__Cyclobacteriaceae	g__norank_f__Cyclobacteriaceae	s__unclassified_g__norank_f__Cyclobacteriaceae	ASV100654	0	0	0	0	0	0	0	0	0	0	0	0	0	0	0	0	1	0	0	0	0	0	0	0	0	0	0	0	0	0	0	0	0	0	0	0	0	0	0	0	0
d__Bacteria	k__norank_d__Bacteria	p__Patescibacteria	c__unclassified_p__Patescibacteria	o__unclassified_p__Patescibacteria	f__unclassified_p__Patescibacteria	g__unclassified_p__Patescibacteria	s__unclassified_p__Patescibacteria	ASV25931	0	0	0	0	0	0	0	0	0	0	0	0	0	0	0	0	0	0	0	0	0	4	0	0	0	0	0	0	0	0	0	0	0	0	0	0	0	0	0	0	0
d__Bacteria	k__norank_d__Bacteria	p__Chloroflexi	c__Anaerolineae	o__Anaerolineales	f__Anaerolineaceae	g__unclassified_f__Anaerolineaceae	s__unclassified_f__Anaerolineaceae	ASV13887	8	0	0	62	31	16	16	68	44	0	0	0	0	0	0	15	0	0	0	0	0	0	0	0	0	0	0	0	0	0	0	0	0	0	0	0	0	0	0	0	0
d__Bacteria	k__norank_d__Bacteria	p__Elusimicrobiota	c__Lineage_IIb	o__norank_c__Lineage_IIb	f__norank_c__Lineage_IIb	g__norank_c__Lineage_IIb	s__uncultured_bacterium_c__Lineage_IIb	ASV45879	0	0	0	2	0	0	0	0	0	0	0	0	0	0	0	0	0	0	0	0	0	0	0	0	0	0	0	0	0	0	0	0	0	0	0	0	0	0	0	0	0
d__Bacteria	k__norank_d__Bacteria	p__Proteobacteria	c__Alphaproteobacteria	o__Rhodobacterales	f__Rhodobacteraceae	g__unclassified_f__Rhodobacteraceae	s__unclassified_f__Rhodobacteraceae	ASV41602	0	0	0	0	0	0	0	0	0	0	0	0	0	0	0	0	0	0	0	4	0	0	0	0	0	0	0	0	0	0	0	0	0	0	0	0	0	0	0	0	0
d__Bacteria	k__norank_d__Bacteria	p__Acidobacteriota	c__Acidobacteriae	o__PAUC26f	f__norank_o__PAUC26f	g__norank_o__PAUC26f	s__unclassified_g__norank_o__PAUC26f	ASV38150	0	0	0	0	0	0	0	0	0	0	0	0	0	0	0	0	0	0	4	0	0	0	0	0	0	0	0	0	0	0	0	0	0	0	0	0	0	0	0	0	0
d__Bacteria	k__norank_d__Bacteria	p__Proteobacteria	c__Alphaproteobacteria	o__unclassified_c__Alphaproteobacteria	f__unclassified_c__Alphaproteobacteria	g__unclassified_c__Alphaproteobacteria	s__unclassified_c__Alphaproteobacteria	ASV47959	0	0	0	0	0	0	0	0	3	0	0	0	0	0	0	0	0	0	0	0	0	0	0	0	0	0	0	0	0	0	0	0	0	0	0	0	0	0	0	0	0
d__Bacteria	k__norank_d__Bacteria	p__Cyanobacteria	c__Vampirivibrionia	o__Gastranaerophilales	f__norank_o__Gastranaerophilales	g__norank_o__Gastranaerophilales	s__uncultured_organism_o__Gastranaerophilales	ASV90546	0	0	0	0	0	0	0	0	0	0	0	0	0	0	0	0	0	0	0	0	4	0	0	0	0	0	0	0	0	0	0	0	0	0	0	0	0	0	0	0	0
d__Bacteria	k__norank_d__Bacteria	p__Myxococcota	c__Polyangia	o__VHS-B3-70	f__norank_o__VHS-B3-70	g__norank_o__VHS-B3-70	s__uncultured_bacterium_o__VHS-B3-70	ASV59753	0	0	0	0	0	0	0	0	0	0	0	0	0	0	0	0	0	0	0	0	0	0	0	0	0	0	0	0	0	0	0	0	0	0	0	0	0	0	0	0	0
d__Bacteria	k__norank_d__Bacteria	p__Proteobacteria	c__Gammaproteobacteria	o__Cellvibrionales	f__Microbulbiferaceae	g__Microbulbifer	s__unclassified_g__Microbulbifer	ASV1692	0	0	0	0	0	0	0	0	0	0	0	0	0	0	0	0	0	0	0	0	0	0	0	0	0	0	0	0	0	0	0	0	0	0	0	0	0	0	0	0	0
d__Bacteria	k__norank_d__Bacteria	p__Bacteroidota	c__Bacteroidia	o__Cytophagales	f__Cyclobacteriaceae	g__norank_f__Cyclobacteriaceae	s__unclassified_g__norank_f__Cyclobacteriaceae	ASV86795	0	0	0	0	0	0	0	0	0	0	0	0	0	0	0	0	0	0	0	0	0	0	0	5	0	0	0	0	0	0	0	0	0	0	0	0	0	0	0	0	0
d__Bacteria	k__norank_d__Bacteria	p__Actinobacteriota	c__Actinobacteria	o__Micrococcales	f__Microbacteriaceae	g__Agromyces	s__unclassified_g__Agromyces	ASV34629	0	0	0	0	0	0	0	0	0	0	0	0	0	0	0	0	0	0	0	0	0	0	0	0	0	0	0	0	0	0	0	0	0	0	0	0	0	0	0	0	0
d__Bacteria	k__norank_d__Bacteria	p__Proteobacteria	c__Alphaproteobacteria	o__unclassified_c__Alphaproteobacteria	f__unclassified_c__Alphaproteobacteria	g__unclassified_c__Alphaproteobacteria	s__unclassified_c__Alphaproteobacteria	ASV10311	0	0	0	0	0	0	0	0	0	0	0	0	0	0	0	0	0	0	0	0	0	0	0	0	0	0	0	0	2	0	0	0	0	0	0	0	0	0	0	0	0
d__Bacteria	k__norank_d__Bacteria	p__Myxococcota	c__Myxococcia	o__Myxococcales	f__Myxococcaceae	g__unclassified_f__Myxococcaceae	s__unclassified_f__Myxococcaceae	ASV43012	0	0	0	0	0	0	0	0	0	0	0	0	0	0	0	0	0	0	0	2	0	0	0	0	0	0	0	0	0	0	0	0	0	0	0	0	0	0	0	0	0
d__Bacteria	k__norank_d__Bacteria	p__Cyanobacteria	c__Cyanobacteriia	o__Thermosynechococcales	f__Thermosynechococcaceae	g__Synechococcus_IR11	s__Pseudanabaena_galeata_SP44	ASV16143	0	0	0	0	0	0	0	0	0	0	0	0	0	0	0	0	0	0	0	0	0	0	0	0	0	19	16	0	0	0	0	0	0	0	0	0	0	0	0	0	0
d__Bacteria	k__norank_d__Bacteria	p__Desulfobacterota	c__Desulfuromonadia	o__unclassified_c__Desulfuromonadia	f__unclassified_c__Desulfuromonadia	g__unclassified_c__Desulfuromonadia	s__unclassified_c__Desulfuromonadia	ASV24510	0	0	0	0	0	0	0	0	0	0	0	0	0	0	0	0	0	1	0	0	0	0	0	0	0	0	0	0	0	0	0	0	0	0	0	0	0	0	0	0	0
d__Bacteria	k__norank_d__Bacteria	p__Acidobacteriota	c__Thermoanaerobaculia	o__Thermoanaerobaculales	f__Thermoanaerobaculaceae	g__Subgroup_10	s__unclassified_g__Subgroup_10	ASV48366	0	0	0	0	0	0	0	0	2	0	0	0	0	0	0	0	0	0	0	0	0	0	0	0	0	0	0	0	0	0	0	0	0	0	0	0	0	0	0	0	0
d__Bacteria	k__norank_d__Bacteria	p__Bacteroidota	c__Bacteroidia	o__Flavobacteriales	f__Flavobacteriaceae	g__norank_f__Flavobacteriaceae	s__bacterium_DG945	ASV45098	0	0	30	5	8	18	0	0	5	0	0	0	0	0	0	0	0	0	0	0	26	0	0	0	0	0	0	0	0	0	0	0	0	0	0	0	0	0	0	0	0
d__Bacteria	k__norank_d__Bacteria	p__Myxococcota	c__bacteriap25	o__norank_c__bacteriap25	f__norank_c__bacteriap25	g__norank_c__bacteriap25	s__uncultured_deep-sea_bacterium_c__bacteriap25	ASV93460	0	0	0	0	0	0	0	0	0	0	0	2	0	0	0	0	0	0	0	0	0	0	0	0	0	0	0	0	0	0	0	0	0	0	0	0	0	0	0	0	0
d__Bacteria	k__norank_d__Bacteria	p__Gemmatimonadota	c__BD2-11_terrestrial_group	o__norank_c__BD2-11_terrestrial_group	f__norank_c__BD2-11_terrestrial_group	g__norank_c__BD2-11_terrestrial_group	s__uncultured_bacterium_c__BD2-11_terrestrial_group	ASV70594	0	0	0	0	0	0	0	0	0	0	4	0	0	0	0	0	0	0	0	0	0	0	0	0	0	0	0	0	0	0	0	0	0	0	0	0	0	0	0	0	0
d__Bacteria	k__norank_d__Bacteria	p__Nitrospinota	c__Nitrospinia	o__Nitrospinales	f__Nitrospinaceae	g__Nitrospina	s__uncultured_bacterium_g__Nitrospina	ASV99919	0	0	0	0	0	0	0	0	0	0	0	0	0	0	0	0	1	0	0	0	0	0	0	0	0	0	0	0	0	0	0	0	0	0	0	0	0	0	0	0	0
d__Bacteria	k__norank_d__Bacteria	p__Chloroflexi	c__Chloroflexia	o__Thermomicrobiales	f__AKYG1722	g__norank_f__AKYG1722	s__uncultured_soil_bacterium_f__AKYG1722	ASV12047	0	0	0	0	0	0	0	0	0	0	0	0	3	0	0	0	0	0	0	0	0	0	0	0	0	0	0	0	0	0	0	0	0	0	0	0	0	0	0	0	0
d__Bacteria	k__norank_d__Bacteria	p__Proteobacteria	c__Alphaproteobacteria	o__Rhizobiales	f__Rhizobiaceae	g__unclassified_f__Rhizobiaceae	s__unclassified_f__Rhizobiaceae	ASV88472	0	0	0	0	0	0	0	0	0	0	0	0	0	0	0	0	0	0	0	0	0	0	0	1	0	0	0	0	0	0	0	0	0	0	0	0	0	0	0	0	0
d__Bacteria	k__norank_d__Bacteria	p__Proteobacteria	c__Gammaproteobacteria	o__unclassified_c__Gammaproteobacteria	f__unclassified_c__Gammaproteobacteria	g__unclassified_c__Gammaproteobacteria	s__unclassified_c__Gammaproteobacteria	ASV57138	0	1	0	0	0	0	0	0	0	0	0	0	0	0	0	0	0	0	0	0	0	0	0	0	0	0	0	0	0	0	0	0	0	0	0	0	0	0	0	0	0
d__Bacteria	k__norank_d__Bacteria	p__Firmicutes	c__Clostridia	o__Lachnospirales	f__Lachnospiraceae	g__unclassified_f__Lachnospiraceae	s__unclassified_f__Lachnospiraceae	ASV56267	0	3	0	0	0	0	0	0	0	0	0	0	0	0	0	0	0	0	0	0	0	0	0	0	0	0	0	0	0	0	0	0	0	0	0	0	0	0	0	0	0
d__Bacteria	k__norank_d__Bacteria	p__Cyanobacteria	c__Cyanobacteriia	o__Cyanobacteriales	f__Microcystaceae	g__unclassified_f__Microcystaceae	s__unclassified_f__Microcystaceae	ASV85668	0	0	0	0	0	0	0	0	0	0	0	0	0	0	0	0	0	0	0	0	0	0	0	0	0	0	0	0	0	0	0	0	0	0	0	0	0	0	0	0	0
d__Bacteria	k__norank_d__Bacteria	p__unclassified_k__norank_d__Bacteria	c__unclassified_k__norank_d__Bacteria	o__unclassified_k__norank_d__Bacteria	f__unclassified_k__norank_d__Bacteria	g__unclassified_k__norank_d__Bacteria	s__unclassified_k__norank_d__Bacteria	ASV46688	0	0	0	2	0	0	0	0	0	0	0	0	0	0	0	0	0	0	0	0	0	0	0	0	0	0	0	0	0	0	0	0	0	0	0	0	0	0	0	0	0
d__Bacteria	k__norank_d__Bacteria	p__Proteobacteria	c__unclassified_p__Proteobacteria	o__unclassified_p__Proteobacteria	f__unclassified_p__Proteobacteria	g__unclassified_p__Proteobacteria	s__unclassified_p__Proteobacteria	ASV57986	0	0	0	0	0	0	0	0	0	0	0	0	0	0	0	0	0	0	0	0	0	0	0	0	0	0	0	0	0	0	0	0	2	0	0	0	0	0	0	0	0
d__Bacteria	k__norank_d__Bacteria	p__Proteobacteria	c__Gammaproteobacteria	o__Legionellales	f__Legionellaceae	g__Legionella	s__unclassified_g__Legionella	ASV88831	0	0	0	0	0	0	0	0	0	0	0	0	0	0	0	0	0	0	0	0	0	0	0	0	0	0	0	0	0	0	0	0	0	0	0	0	0	0	0	0	0
d__Bacteria	k__norank_d__Bacteria	p__Firmicutes	c__Bacilli	o__Alicyclobacillales	f__Alicyclobacillaceae	g__Tumebacillus	s__Tumebacillus_algifaecis	ASV53867	0	0	0	0	0	0	0	0	0	0	0	0	0	0	0	0	0	0	0	0	0	0	0	0	0	0	0	0	0	0	0	0	0	0	0	0	0	0	0	0	0
d__Bacteria	k__norank_d__Bacteria	p__Desulfobacterota	c__Desulfobacteria	o__Desulfatiglandales	f__Desulfatiglandaceae	g__Desulfatiglans	s__uncultured_organism_g__Desulfatiglans	ASV20101	0	0	0	0	0	0	0	0	0	0	0	0	0	0	0	0	0	0	0	0	0	0	0	0	0	0	0	0	0	0	0	0	0	0	6	0	0	0	0	0	0
d__Bacteria	k__norank_d__Bacteria	p__Acidobacteriota	c__Thermoanaerobaculia	o__Thermoanaerobaculales	f__Thermoanaerobaculaceae	g__Subgroup_10	s__unclassified_g__Subgroup_10	ASV16382	0	0	0	0	0	0	0	0	0	0	0	0	0	0	0	0	0	0	0	0	0	0	0	0	0	5	14	0	0	0	0	0	0	0	0	0	0	0	0	0	0
d__Bacteria	k__norank_d__Bacteria	p__Synergistota	c__Synergistia	o__Synergistales	f__Synergistaceae	g__EBM-39	s__uncultured_organism_g__EBM-39	ASV82559	0	0	0	0	0	0	0	0	0	0	0	0	0	0	0	0	0	0	0	0	0	0	0	0	0	0	0	0	0	0	0	0	0	0	0	0	0	0	1	0	0
d__Bacteria	k__norank_d__Bacteria	p__unclassified_k__norank_d__Bacteria	c__unclassified_k__norank_d__Bacteria	o__unclassified_k__norank_d__Bacteria	f__unclassified_k__norank_d__Bacteria	g__unclassified_k__norank_d__Bacteria	s__unclassified_k__norank_d__Bacteria	ASV94571	0	0	0	0	0	0	0	0	0	0	0	0	0	0	0	0	0	0	0	0	0	0	0	0	0	0	0	0	0	0	0	0	0	0	0	0	0	0	0	0	0
d__Bacteria	k__norank_d__Bacteria	p__Planctomycetota	c__unclassified_p__Planctomycetota	o__unclassified_p__Planctomycetota	f__unclassified_p__Planctomycetota	g__unclassified_p__Planctomycetota	s__unclassified_p__Planctomycetota	ASV18368	0	0	0	0	0	0	0	0	0	0	0	0	0	0	0	0	0	0	0	0	0	0	0	0	0	0	1	0	0	0	0	0	0	0	0	0	0	0	0	0	0
d__Bacteria	k__norank_d__Bacteria	p__Proteobacteria	c__Gammaproteobacteria	o__unclassified_c__Gammaproteobacteria	f__unclassified_c__Gammaproteobacteria	g__unclassified_c__Gammaproteobacteria	s__unclassified_c__Gammaproteobacteria	ASV39382	0	0	0	0	0	0	0	0	0	0	0	0	0	0	0	0	0	0	1	0	0	0	0	0	0	0	0	0	0	0	0	0	0	0	0	0	0	0	0	0	0
d__Bacteria	k__norank_d__Bacteria	p__unclassified_k__norank_d__Bacteria	c__unclassified_k__norank_d__Bacteria	o__unclassified_k__norank_d__Bacteria	f__unclassified_k__norank_d__Bacteria	g__unclassified_k__norank_d__Bacteria	s__unclassified_k__norank_d__Bacteria	ASV42148	0	0	0	0	0	0	0	0	0	0	0	0	0	0	0	0	0	0	0	2	0	0	0	0	0	0	0	0	0	0	0	0	0	0	0	0	0	0	0	0	0
d__Bacteria	k__norank_d__Bacteria	p__Firmicutes	c__unclassified_p__Firmicutes	o__unclassified_p__Firmicutes	f__unclassified_p__Firmicutes	g__unclassified_p__Firmicutes	s__unclassified_p__Firmicutes	ASV101449	0	0	0	0	0	0	0	0	0	0	0	0	0	0	0	0	2	0	0	0	0	0	0	0	0	0	0	0	0	0	0	0	0	0	0	0	0	0	0	0	0
d__Bacteria	k__norank_d__Bacteria	p__Proteobacteria	c__Gammaproteobacteria	o__Milano-WF1B-44	f__norank_o__Milano-WF1B-44	g__norank_o__Milano-WF1B-44	s__unclassified_g__norank_o__Milano-WF1B-44	ASV19512	0	0	0	0	0	0	0	0	0	0	0	0	0	0	0	0	0	0	0	0	0	0	0	0	0	0	0	0	0	0	150	151	178	26	24	25	0	0	0	0	0
d__Bacteria	k__norank_d__Bacteria	p__Bacteroidota	c__Ignavibacteria	o__Ignavibacteriales	f__Ignavibacteriaceae	g__Ignavibacterium	s__uncultured_Bacteroidetes_bacterium_g__Ignavibacterium	ASV21459	0	0	0	0	0	0	0	0	0	0	5	0	0	0	0	6	25	18	44	139	59	0	0	0	0	0	0	0	0	0	0	0	0	0	0	0	0	0	0	0	0
d__Bacteria	k__norank_d__Bacteria	p__Acidobacteriota	c__Aminicenantia	o__Aminicenantales	f__norank_o__Aminicenantales	g__norank_o__Aminicenantales	s__unclassified_g__norank_o__Aminicenantales	ASV93964	0	0	0	0	0	0	0	0	0	0	0	0	0	0	0	0	0	0	0	0	0	0	0	0	0	0	0	0	0	0	0	0	0	0	0	0	0	0	0	0	0
d__Bacteria	k__norank_d__Bacteria	p__Proteobacteria	c__Alphaproteobacteria	o__unclassified_c__Alphaproteobacteria	f__unclassified_c__Alphaproteobacteria	g__unclassified_c__Alphaproteobacteria	s__unclassified_c__Alphaproteobacteria	ASV44765	0	0	0	0	0	0	2	0	0	0	0	0	0	0	0	0	0	0	0	0	0	0	0	0	0	0	0	0	0	0	0	0	0	0	0	0	0	0	0	0	0
d__Bacteria	k__norank_d__Bacteria	p__Proteobacteria	c__Gammaproteobacteria	o__Vibrionales	f__Vibrionaceae	g__Photobacterium	s__unclassified_g__Photobacterium	ASV29130	0	0	0	0	0	0	0	0	0	0	0	0	0	0	0	0	0	0	0	0	0	0	7	0	0	0	0	0	0	0	0	4	0	0	0	0	0	5	0	0	0
d__Bacteria	k__norank_d__Bacteria	p__Planctomycetota	c__OM190	o__norank_c__OM190	f__norank_c__OM190	g__norank_c__OM190	s__unclassified_g__norank_c__OM190	ASV93031	0	0	0	0	0	0	0	0	0	0	0	4	0	0	0	0	0	0	0	0	0	0	0	0	0	0	0	0	0	0	0	0	0	0	0	0	0	0	0	0	0
d__Bacteria	k__norank_d__Bacteria	p__Proteobacteria	c__Alphaproteobacteria	o__Rhodobacterales	f__Rhodobacteraceae	g__unclassified_f__Rhodobacteraceae	s__unclassified_f__Rhodobacteraceae	ASV71230	0	0	0	0	0	0	0	0	0	0	3	0	0	0	0	0	0	0	0	0	0	0	0	0	0	0	0	0	0	0	0	0	0	0	0	0	0	0	0	0	0
d__Bacteria	k__norank_d__Bacteria	p__Bacteroidota	c__Bacteroidia	o__Flavobacteriales	f__NS9_marine_group	g__norank_f__NS9_marine_group	s__metagenome_f__NS9_marine_group	ASV76452	0	0	0	0	0	0	0	0	0	0	0	0	0	0	0	0	0	0	0	0	0	0	0	0	0	0	0	0	0	0	0	0	0	0	0	0	0	0	0	1	0
d__Bacteria	k__norank_d__Bacteria	p__Actinobacteriota	c__Actinobacteria	o__unclassified_c__Actinobacteria	f__unclassified_c__Actinobacteria	g__unclassified_c__Actinobacteria	s__unclassified_c__Actinobacteria	ASV35651	0	0	0	0	0	0	0	0	0	0	0	0	0	0	0	0	0	0	0	0	0	0	0	0	0	0	0	0	0	0	0	0	0	0	0	0	0	0	0	0	0
d__Bacteria	k__norank_d__Bacteria	p__Chloroflexi	c__Anaerolineae	o__Anaerolineales	f__Anaerolineaceae	g__norank_f__Anaerolineaceae	s__unclassified_g__norank_f__Anaerolineaceae	ASV38126	0	0	0	0	0	0	0	0	0	0	0	0	0	0	0	0	0	0	4	0	0	0	0	0	0	0	0	0	0	0	0	0	0	0	0	0	0	0	0	0	0
d__Bacteria	k__norank_d__Bacteria	p__Planctomycetota	c__OM190	o__norank_c__OM190	f__norank_c__OM190	g__norank_c__OM190	s__unclassified_g__norank_c__OM190	ASV61103	0	0	0	0	0	0	0	0	0	0	0	0	0	4	0	0	0	0	0	0	0	0	0	0	0	0	0	0	0	0	0	0	0	0	0	0	0	0	0	0	0
d__Bacteria	k__norank_d__Bacteria	p__Myxococcota	c__Polyangia	o__Polyangiales	f__Sandaracinaceae	g__norank_f__Sandaracinaceae	s__unclassified_g__norank_f__Sandaracinaceae	ASV56308	0	2	0	0	0	0	0	0	0	0	0	0	0	0	0	0	0	0	0	0	0	0	0	0	0	0	0	0	0	0	0	0	0	0	0	0	0	0	0	0	0
d__Bacteria	k__norank_d__Bacteria	p__Proteobacteria	c__unclassified_p__Proteobacteria	o__unclassified_p__Proteobacteria	f__unclassified_p__Proteobacteria	g__unclassified_p__Proteobacteria	s__unclassified_p__Proteobacteria	ASV25875	0	0	0	0	0	0	0	0	0	0	0	0	0	0	0	0	0	0	0	0	0	6	0	0	0	0	0	0	0	0	0	0	0	0	0	0	0	0	0	0	0
d__Bacteria	k__norank_d__Bacteria	p__unclassified_k__norank_d__Bacteria	c__unclassified_k__norank_d__Bacteria	o__unclassified_k__norank_d__Bacteria	f__unclassified_k__norank_d__Bacteria	g__unclassified_k__norank_d__Bacteria	s__unclassified_k__norank_d__Bacteria	ASV82880	0	0	0	0	0	0	0	0	0	0	0	0	0	0	0	0	0	0	0	0	0	0	0	0	0	0	0	0	0	0	0	0	0	0	0	0	0	0	2	0	0
d__Bacteria	k__norank_d__Bacteria	p__Chloroflexi	c__Anaerolineae	o__Anaerolineales	f__Anaerolineaceae	g__norank_f__Anaerolineaceae	s__unclassified_g__norank_f__Anaerolineaceae	ASV25897	0	0	0	0	0	0	0	0	0	0	0	0	0	0	0	0	0	0	0	0	0	6	0	0	0	0	0	0	0	0	0	0	0	0	0	0	0	0	0	0	0
d__Bacteria	k__norank_d__Bacteria	p__Myxococcota	c__Polyangia	o__Polyangiales	f__Sandaracinaceae	g__Sandaracinus	s__uncultured_soil_bacterium_g__Sandaracinus	ASV90945	0	0	0	0	0	0	0	0	0	0	0	0	0	0	0	0	0	0	0	0	3	0	0	0	0	0	0	0	0	0	0	0	0	0	0	0	0	0	0	0	0
d__Bacteria	k__norank_d__Bacteria	p__Firmicutes	c__Clostridia	o__Clostridiales	f__Clostridiaceae	g__Clostridium_sensu_stricto_1	s__uncultured_Eubacterium_sp._g__Clostridium_sensu_stricto_1	ASV31290	0	0	0	0	0	0	0	0	0	0	0	0	0	0	0	0	0	0	0	0	0	0	0	0	0	0	0	0	0	0	0	0	0	0	0	5	7	0	12	0	0
d__Bacteria	k__norank_d__Bacteria	p__unclassified_k__norank_d__Bacteria	c__unclassified_k__norank_d__Bacteria	o__unclassified_k__norank_d__Bacteria	f__unclassified_k__norank_d__Bacteria	g__unclassified_k__norank_d__Bacteria	s__unclassified_k__norank_d__Bacteria	ASV45748	0	0	0	3	0	0	0	0	0	0	0	0	0	0	0	0	0	0	0	0	0	0	0	0	0	0	0	0	0	0	0	0	0	0	0	0	0	0	0	0	0
d__Bacteria	k__norank_d__Bacteria	p__Actinobacteriota	c__Acidimicrobiia	o__Microtrichales	f__norank_o__Microtrichales	g__norank_o__Microtrichales	s__bacterium_YC-LK-LKJ22	ASV29207	0	0	0	0	0	0	0	0	0	0	0	0	0	0	0	0	0	0	0	0	0	0	9	0	0	0	0	0	0	0	0	0	0	0	0	0	0	0	4	0	0
d__Bacteria	k__norank_d__Bacteria	p__Proteobacteria	c__Alphaproteobacteria	o__norank_c__Alphaproteobacteria	f__norank_c__Alphaproteobacteria	g__norank_c__Alphaproteobacteria	s__uncultured_Acetobacteraceae_bacterium_c__Alphaproteobacteria	ASV93361	0	0	0	0	0	0	0	0	0	0	0	2	0	0	0	0	0	0	0	0	0	0	0	0	0	0	0	0	0	0	0	0	0	0	0	0	0	0	0	0	0
d__Bacteria	k__norank_d__Bacteria	p__Firmicutes	c__Clostridia	o__Clostridiales	f__Clostridiaceae	g__unclassified_f__Clostridiaceae	s__unclassified_f__Clostridiaceae	ASV79564	0	0	0	0	0	0	0	0	0	0	0	0	0	0	0	0	0	0	0	0	0	0	0	0	0	0	0	0	0	0	0	1	0	0	0	0	0	0	0	0	0
d__Bacteria	k__norank_d__Bacteria	p__Acidobacteriota	c__Thermoanaerobaculia	o__Thermoanaerobaculales	f__Thermoanaerobaculaceae	g__Subgroup_10	s__unclassified_g__Subgroup_10	ASV47609	0	0	0	0	0	0	0	0	6	0	0	0	0	0	0	0	0	0	0	0	0	0	0	0	0	0	0	0	0	0	0	0	0	0	0	0	0	0	0	0	0
d__Bacteria	k__norank_d__Bacteria	p__Bacteroidota	c__Bacteroidia	o__Flavobacteriales	f__Flavobacteriaceae	g__unclassified_f__Flavobacteriaceae	s__unclassified_f__Flavobacteriaceae	ASV41396	0	0	0	0	0	0	0	0	0	0	0	0	0	0	0	0	0	0	0	7	0	0	0	0	0	0	0	0	0	0	0	0	0	0	0	0	0	0	0	0	0
d__Bacteria	k__norank_d__Bacteria	p__Firmicutes	c__Clostridia	o__Clostridiales	f__Clostridiaceae	g__Clostridium_sensu_stricto_7	s__Clostridium_sp._r53	ASV86482	0	0	0	0	0	0	0	0	0	0	0	0	0	0	0	0	0	0	0	0	0	0	0	10	0	0	0	0	0	0	0	0	0	0	0	0	0	0	0	0	0
d__Bacteria	k__norank_d__Bacteria	p__Bacteroidota	c__Bacteroidia	o__Cytophagales	f__Cyclobacteriaceae	g__unclassified_f__Cyclobacteriaceae	s__unclassified_f__Cyclobacteriaceae	ASV17766	0	0	0	0	0	0	0	0	0	0	0	0	0	0	0	0	0	0	0	0	0	0	0	0	0	0	2	0	0	0	0	0	0	0	0	0	0	0	0	0	0
d__Bacteria	k__norank_d__Bacteria	p__Desulfobacterota	c__Desulfuromonadia	o__Sva1033	f__norank_o__Sva1033	g__norank_o__Sva1033	s__uncultured_bacterium_o__Sva1033	ASV34623	0	0	0	0	0	0	0	0	0	0	0	0	0	0	0	0	0	0	0	0	0	0	0	0	0	0	0	0	0	0	0	0	0	0	0	0	0	0	0	0	0
d__Bacteria	k__norank_d__Bacteria	p__Proteobacteria	c__Gammaproteobacteria	o__Coxiellales	f__Coxiellaceae	g__Coxiella	s__unclassified_g__Coxiella	ASV68547	0	0	0	0	0	0	0	0	0	0	0	0	0	0	0	2	0	0	0	0	0	0	0	0	0	0	0	0	0	0	0	0	0	0	0	0	0	0	0	0	0
d__Bacteria	k__norank_d__Bacteria	p__Chloroflexi	c__unclassified_p__Chloroflexi	o__unclassified_p__Chloroflexi	f__unclassified_p__Chloroflexi	g__unclassified_p__Chloroflexi	s__unclassified_p__Chloroflexi	ASV76105	0	0	0	0	0	0	0	0	0	0	0	0	0	0	0	0	0	0	0	0	0	0	0	0	0	0	0	0	0	0	0	0	0	0	0	0	0	0	0	2	0
d__Bacteria	k__norank_d__Bacteria	p__Planctomycetota	c__Phycisphaerae	o__Phycisphaerales	f__Phycisphaeraceae	g__SM1A02	s__unclassified_g__SM1A02	ASV38517	0	0	0	0	0	0	0	0	0	0	0	0	0	0	0	0	0	0	3	2	0	0	0	0	0	0	0	0	0	0	0	0	0	0	0	0	0	3	0	0	0
d__Bacteria	k__norank_d__Bacteria	p__Bacteroidota	c__Bacteroidia	o__Bacteroidales	f__Prolixibacteraceae	g__norank_f__Prolixibacteraceae	s__Bacteroidales_bacterium_6E	ASV91156	0	0	0	0	0	0	0	0	0	0	0	0	0	0	0	0	0	0	0	0	3	0	0	0	0	0	0	0	0	0	0	0	0	0	0	0	0	0	0	0	0
d__Bacteria	k__norank_d__Bacteria	p__Proteobacteria	c__Gammaproteobacteria	o__Cellvibrionales	f__Halieaceae	g__unclassified_f__Halieaceae	s__unclassified_f__Halieaceae	ASV28688	0	0	0	0	0	0	0	0	0	0	0	0	0	0	0	0	0	0	0	0	0	0	0	0	0	0	0	0	0	0	0	0	0	2	0	0	0	0	0	0	0
d__Bacteria	k__norank_d__Bacteria	p__Desulfobacterota	c__unclassified_p__Desulfobacterota	o__unclassified_p__Desulfobacterota	f__unclassified_p__Desulfobacterota	g__unclassified_p__Desulfobacterota	s__unclassified_p__Desulfobacterota	ASV95109	0	0	0	0	0	0	0	0	0	0	0	0	0	0	0	0	0	0	0	0	0	0	0	0	0	0	0	0	0	0	0	0	0	0	0	0	0	0	0	0	0
d__Bacteria	k__norank_d__Bacteria	p__Bacteroidota	c__Kryptonia	o__Kryptoniales	f__MSB-3C8	g__norank_f__MSB-3C8	s__unclassified_g__norank_f__MSB-3C8	ASV17717	0	0	0	0	0	0	0	0	0	0	0	0	0	0	0	0	0	0	0	0	0	0	0	0	0	0	2	0	0	0	0	0	0	0	0	0	0	0	0	0	0
d__Bacteria	k__norank_d__Bacteria	p__Acidobacteriota	c__Vicinamibacteria	o__Vicinamibacterales	f__Vicinamibacteraceae	g__norank_f__Vicinamibacteraceae	s__unclassified_g__norank_f__Vicinamibacteraceae	ASV98551	0	0	0	0	0	0	0	0	0	0	0	0	0	0	0	0	11	0	0	0	0	0	0	0	0	0	0	0	0	0	0	0	0	0	0	0	0	0	0	0	0
d__Bacteria	k__norank_d__Bacteria	p__Firmicutes	c__Clostridia	o__Clostridiales	f__unclassified_o__Clostridiales	g__unclassified_o__Clostridiales	s__unclassified_o__Clostridiales	ASV63530	0	0	0	0	0	0	0	0	0	0	0	0	0	0	0	0	0	0	0	0	0	0	0	0	0	0	0	0	0	0	0	0	0	0	0	1	0	0	0	0	0
d__Bacteria	k__norank_d__Bacteria	p__Chloroflexi	c__Anaerolineae	o__unclassified_c__Anaerolineae	f__unclassified_c__Anaerolineae	g__unclassified_c__Anaerolineae	s__unclassified_c__Anaerolineae	ASV62404	0	0	0	0	0	0	0	0	0	0	0	0	0	1	0	0	0	0	0	0	0	0	0	0	0	0	0	0	0	0	0	0	0	0	0	0	0	0	0	0	0
d__Bacteria	k__norank_d__Bacteria	p__Firmicutes	c__Clostridia	o__norank_c__Clostridia	f__Hungateiclostridiaceae	g__unclassified_f__Hungateiclostridiaceae	s__unclassified_f__Hungateiclostridiaceae	ASV96451	0	0	0	0	0	0	0	0	0	0	0	0	0	0	0	0	0	0	0	0	0	0	0	0	0	0	0	0	0	0	0	0	0	0	0	0	0	0	0	0	3
d__Bacteria	k__norank_d__Bacteria	p__Actinobacteriota	c__Acidimicrobiia	o__Microtrichales	f__Ilumatobacteraceae	g__Ilumatobacter	s__unclassified_g__Ilumatobacter	ASV36047	0	0	0	0	0	0	0	0	0	0	0	0	0	0	0	0	0	0	0	0	0	0	0	0	0	0	0	8	0	0	0	0	0	0	0	0	0	0	0	0	0
d__Bacteria	k__norank_d__Bacteria	p__Firmicutes	c__Bacilli	o__Bacillales	f__Bacillaceae	g__Bacillus	s__unclassified_g__Bacillus	ASV50417	0	0	0	0	0	0	0	0	0	2	0	0	0	0	0	0	0	0	0	0	0	0	0	0	0	0	0	0	0	0	0	0	0	0	0	0	0	0	0	0	0
d__Bacteria	k__norank_d__Bacteria	p__Firmicutes	c__Limnochordia	o__norank_c__Limnochordia	f__norank_c__Limnochordia	g__Hydrogenispora	s__unclassified_g__Hydrogenispora	ASV65374	0	0	2	0	0	0	0	0	0	0	0	0	0	0	0	0	0	0	0	0	0	0	0	0	0	0	0	0	0	0	0	0	0	0	0	0	0	0	0	0	0
d__Bacteria	k__norank_d__Bacteria	p__Desulfobacterota	c__Desulfobulbia	o__Desulfobulbales	f__Desulfobulbaceae	g__unclassified_f__Desulfobulbaceae	s__unclassified_f__Desulfobulbaceae	ASV30254	0	0	0	0	0	0	0	0	0	0	0	0	0	0	0	0	0	0	0	0	0	0	3	0	0	0	0	0	0	0	0	0	0	0	0	0	0	0	0	0	0
d__Bacteria	k__norank_d__Bacteria	p__Chloroflexi	c__Anaerolineae	o__unclassified_c__Anaerolineae	f__unclassified_c__Anaerolineae	g__unclassified_c__Anaerolineae	s__unclassified_c__Anaerolineae	ASV64856	0	0	0	0	0	0	0	0	0	0	0	0	0	0	0	0	0	0	0	0	0	0	0	0	0	0	0	0	0	0	0	0	0	0	0	0	0	0	0	0	0
d__Bacteria	k__norank_d__Bacteria	p__Patescibacteria	c__Saccharimonadia	o__Saccharimonadales	f__unclassified_o__Saccharimonadales	g__unclassified_o__Saccharimonadales	s__unclassified_o__Saccharimonadales	ASV46214	0	0	0	2	0	0	0	0	0	0	0	0	0	0	0	0	0	0	0	0	0	0	0	0	0	0	0	0	0	0	0	0	0	0	0	0	0	0	0	0	0
d__Bacteria	k__norank_d__Bacteria	p__Desulfobacterota	c__Desulfobulbia	o__Desulfobulbales	f__Desulfocapsaceae	g__norank_f__Desulfocapsaceae	s__unclassified_g__norank_f__Desulfocapsaceae	ASV1093	5	6	4	0	0	0	0	0	0	0	0	0	0	0	4	4	6	10	0	0	0	8	13	0	0	0	10	0	0	0	0	0	0	0	0	0	0	0	0	0	0
d__Bacteria	k__norank_d__Bacteria	p__unclassified_k__norank_d__Bacteria	c__unclassified_k__norank_d__Bacteria	o__unclassified_k__norank_d__Bacteria	f__unclassified_k__norank_d__Bacteria	g__unclassified_k__norank_d__Bacteria	s__unclassified_k__norank_d__Bacteria	ASV26594	0	0	0	0	0	0	0	0	0	0	0	0	0	0	0	0	0	0	0	0	0	3	0	0	0	0	0	0	0	0	1	0	0	0	0	0	0	0	0	0	0
d__Bacteria	k__norank_d__Bacteria	p__Proteobacteria	c__Gammaproteobacteria	o__Aeromonadales	f__Aeromonadaceae	g__Aeromonas	s__unclassified_g__Aeromonas	ASV65356	0	0	5	0	0	0	0	0	0	0	0	0	0	0	0	0	0	0	0	0	0	0	0	0	0	0	0	0	0	0	0	0	0	0	0	0	0	0	0	0	0
d__Bacteria	k__norank_d__Bacteria	p__unclassified_k__norank_d__Bacteria	c__unclassified_k__norank_d__Bacteria	o__unclassified_k__norank_d__Bacteria	f__unclassified_k__norank_d__Bacteria	g__unclassified_k__norank_d__Bacteria	s__unclassified_k__norank_d__Bacteria	ASV18898	0	0	0	0	0	0	0	0	0	0	0	0	0	0	0	0	0	0	0	0	0	0	0	0	0	0	2	0	0	0	0	0	0	0	0	0	0	0	0	0	0
d__Bacteria	k__norank_d__Bacteria	p__Acidobacteriota	c__Subgroup_22	o__norank_c__Subgroup_22	f__norank_c__Subgroup_22	g__norank_c__Subgroup_22	s__uncultured_bacterium_c__Subgroup_22	ASV16758	0	0	0	0	0	0	0	0	0	0	0	0	0	0	0	0	0	0	0	0	0	5	0	0	0	13	5	0	0	3	0	0	0	0	0	0	3	0	0	0	0
d__Bacteria	k__norank_d__Bacteria	p__Bacteroidota	c__Bacteroidia	o__Flavobacteriales	f__NS9_marine_group	g__norank_f__NS9_marine_group	s__uncultured_Flavobacterium_sp._f__NS9_marine_group	ASV97726	0	0	0	0	0	0	0	0	0	0	0	0	0	0	0	0	0	0	0	0	0	0	0	0	2	0	0	0	0	0	0	0	0	0	0	0	0	0	0	0	0
d__Bacteria	k__norank_d__Bacteria	p__Firmicutes	c__Limnochordia	o__norank_c__Limnochordia	f__norank_c__Limnochordia	g__Hydrogenispora	s__uncultured_bacterium_g__Hydrogenispora	ASV75463	0	0	0	0	0	0	0	0	0	0	0	0	0	0	0	0	0	0	0	0	0	0	0	0	0	0	0	0	0	0	0	0	0	0	0	0	0	0	0	3	0
d__Bacteria	k__norank_d__Bacteria	p__Proteobacteria	c__Gammaproteobacteria	o__unclassified_c__Gammaproteobacteria	f__unclassified_c__Gammaproteobacteria	g__unclassified_c__Gammaproteobacteria	s__unclassified_c__Gammaproteobacteria	ASV23986	0	0	0	0	0	0	0	0	0	0	0	0	0	0	0	0	0	2	0	0	0	0	0	0	0	0	0	0	0	0	0	0	0	0	0	0	0	0	0	0	0
d__Bacteria	k__norank_d__Bacteria	p__Proteobacteria	c__Alphaproteobacteria	o__Sphingomonadales	f__Sphingomonadaceae	g__unclassified_f__Sphingomonadaceae	s__unclassified_f__Sphingomonadaceae	ASV45550	0	0	0	3	0	0	0	0	0	0	0	0	0	0	0	0	0	0	0	0	0	0	0	0	0	0	0	0	0	0	0	0	0	0	0	0	0	0	0	0	0
d__Bacteria	k__norank_d__Bacteria	p__Proteobacteria	c__Alphaproteobacteria	o__Rhodobacterales	f__Rhodobacteraceae	g__unclassified_f__Rhodobacteraceae	s__unclassified_f__Rhodobacteraceae	ASV84626	0	0	0	0	0	0	0	0	0	0	0	0	0	0	0	0	0	0	0	0	0	0	0	0	0	0	0	0	0	0	0	0	0	0	0	0	0	0	0	0	0
d__Bacteria	k__norank_d__Bacteria	p__Chloroflexi	c__Chloroflexia	o__Chloroflexales	f__Roseiflexaceae	g__norank_f__Roseiflexaceae	s__uncultured_bacterium_f__Roseiflexaceae	ASV71459	0	0	0	0	0	0	0	0	0	0	2	0	0	0	0	0	0	0	0	0	0	0	0	0	0	0	0	0	0	0	0	0	0	0	0	0	0	0	0	0	0
d__Bacteria	k__norank_d__Bacteria	p__Proteobacteria	c__Alphaproteobacteria	o__Holosporales	f__Holosporaceae	g__norank_f__Holosporaceae	s__uncultured_bacterium_f__Holosporaceae	ASV13025	0	0	0	0	0	0	0	0	0	0	0	0	2	0	0	0	0	0	0	0	0	0	0	0	0	0	0	0	0	0	0	0	0	0	0	0	0	0	0	0	0
d__Bacteria	k__norank_d__Bacteria	p__Chloroflexi	c__Anaerolineae	o__norank_c__Anaerolineae	f__norank_c__Anaerolineae	g__norank_c__Anaerolineae	s__uncultured_bacterium_c__Anaerolineae	ASV19709	0	0	0	0	0	0	0	0	0	0	0	0	0	0	0	0	0	0	0	0	0	0	15	8	0	0	0	0	0	0	34	59	38	0	10	0	17	13	19	0	0
d__Bacteria	k__norank_d__Bacteria	p__Actinobacteriota	c__Thermoleophilia	o__Gaiellales	f__norank_o__Gaiellales	g__norank_o__Gaiellales	s__unclassified_g__norank_o__Gaiellales	ASV80727	0	0	0	0	0	0	0	0	0	0	0	0	0	0	0	0	0	0	0	0	0	0	0	0	0	0	0	0	0	3	0	0	0	0	0	0	0	0	0	0	0
d__Bacteria	k__norank_d__Bacteria	p__Armatimonadota	c__DG-56	o__norank_c__DG-56	f__norank_c__DG-56	g__norank_c__DG-56	s__uncultured_bacterium_c__DG-56	ASV92589	0	0	0	0	0	0	0	0	0	0	0	6	0	0	0	0	0	0	0	0	0	0	0	0	0	0	0	0	0	0	0	0	0	0	0	0	0	0	0	0	0
d__Bacteria	k__norank_d__Bacteria	p__Verrucomicrobiota	c__Chlamydiae	o__Chlamydiales	f__Chlamydiaceae	g__norank_f__Chlamydiaceae	s__uncultured_organism_f__Chlamydiaceae	ASV80846	0	0	0	0	0	0	0	0	0	0	0	0	0	0	0	0	0	0	0	0	0	0	0	0	0	0	0	0	0	2	0	0	0	0	0	0	0	0	0	0	0
d__Bacteria	k__norank_d__Bacteria	p__Desulfobacterota	c__Desulfobaccia	o__Desulfobaccales	f__Desulfobaccaceae	g__Desulfobacca	s__uncultured_archaeon_g__Desulfobacca	ASV5481	0	0	0	0	0	0	0	0	0	0	0	0	0	0	3	0	0	0	0	0	0	0	0	0	0	0	0	0	0	0	0	0	0	0	0	0	0	0	0	0	0
d__Bacteria	k__norank_d__Bacteria	p__Bacteroidota	c__Bacteroidia	o__Cytophagales	f__Microscillaceae	g__norank_f__Microscillaceae	s__unclassified_g__norank_f__Microscillaceae	ASV67617	0	0	0	0	0	0	0	0	0	0	0	0	0	0	0	5	0	0	0	0	0	0	0	0	0	0	0	0	0	0	0	0	0	0	0	0	0	0	0	0	0
d__Bacteria	k__norank_d__Bacteria	p__Bacteroidota	c__Bacteroidia	o__Flavobacteriales	f__Cryomorphaceae	g__Vicingus	s__uncultured_bacterium_g__Vicingus	ASV32091	0	0	0	0	0	0	0	0	0	0	0	0	0	0	0	0	0	0	0	0	0	0	0	0	7	0	0	0	0	0	0	0	0	0	0	0	1	0	0	0	0
d__Bacteria	k__norank_d__Bacteria	p__unclassified_k__norank_d__Bacteria	c__unclassified_k__norank_d__Bacteria	o__unclassified_k__norank_d__Bacteria	f__unclassified_k__norank_d__Bacteria	g__unclassified_k__norank_d__Bacteria	s__unclassified_k__norank_d__Bacteria	ASV83585	0	0	0	0	0	0	0	0	0	0	0	0	0	0	0	0	0	0	0	0	0	0	0	0	0	0	0	0	0	0	2	0	0	0	0	0	0	0	0	0	0
d__Bacteria	k__norank_d__Bacteria	p__Proteobacteria	c__Alphaproteobacteria	o__Rhodobacterales	f__Rhodobacteraceae	g__Paracoccus	s__unclassified_g__Paracoccus	ASV7709	0	0	0	0	0	0	0	0	0	0	0	0	0	0	0	0	0	0	0	0	0	0	0	0	0	0	0	7	19	7	0	0	16	0	0	0	0	0	0	0	0
d__Bacteria	k__norank_d__Bacteria	p__Proteobacteria	c__Alphaproteobacteria	o__Rhodobacterales	f__Rhodobacteraceae	g__Limibaculum	s__uncultured_Alphaproteobacteria_bacterium_g__Limibaculum	ASV25446	0	0	0	0	0	0	0	0	0	0	0	0	0	0	0	0	0	0	0	0	0	7	4	0	0	0	0	0	0	0	0	0	0	0	0	0	0	0	0	0	0
d__Bacteria	k__norank_d__Bacteria	p__Chloroflexi	c__Anaerolineae	o__Caldilineales	f__Caldilineaceae	g__norank_f__Caldilineaceae	s__unclassified_g__norank_f__Caldilineaceae	ASV24904	0	0	0	0	0	0	0	0	0	0	0	0	0	0	0	0	0	2	0	0	0	0	0	0	0	0	0	0	0	0	0	0	0	0	0	0	0	0	0	0	0
d__Bacteria	k__norank_d__Bacteria	p__Chloroflexi	c__Anaerolineae	o__unclassified_c__Anaerolineae	f__unclassified_c__Anaerolineae	g__unclassified_c__Anaerolineae	s__unclassified_c__Anaerolineae	ASV79323	0	0	0	0	0	0	0	0	0	0	0	0	0	0	0	0	0	0	0	0	0	0	0	0	0	0	0	0	0	0	0	2	0	0	0	0	0	0	0	0	0
d__Bacteria	k__norank_d__Bacteria	p__unclassified_k__norank_d__Bacteria	c__unclassified_k__norank_d__Bacteria	o__unclassified_k__norank_d__Bacteria	f__unclassified_k__norank_d__Bacteria	g__unclassified_k__norank_d__Bacteria	s__unclassified_k__norank_d__Bacteria	ASV54350	0	0	0	0	0	0	0	0	0	0	0	0	0	0	0	0	0	0	0	0	0	0	0	0	0	0	0	0	0	0	0	0	0	0	0	0	0	0	0	0	0
d__Bacteria	k__norank_d__Bacteria	p__unclassified_k__norank_d__Bacteria	c__unclassified_k__norank_d__Bacteria	o__unclassified_k__norank_d__Bacteria	f__unclassified_k__norank_d__Bacteria	g__unclassified_k__norank_d__Bacteria	s__unclassified_k__norank_d__Bacteria	ASV24402	0	0	0	0	0	0	0	0	0	0	0	0	0	0	0	0	0	2	0	0	0	0	0	0	0	0	0	0	0	0	0	0	0	0	0	0	0	0	0	0	0
d__Bacteria	k__norank_d__Bacteria	p__Actinobacteriota	c__Acidimicrobiia	o__Actinomarinales	f__norank_o__Actinomarinales	g__norank_o__Actinomarinales	s__unclassified_g__norank_o__Actinomarinales	ASV58814	0	0	0	0	0	0	0	0	0	0	0	0	0	0	0	0	0	0	0	0	0	0	0	0	0	0	0	0	0	0	0	0	1	0	0	0	0	0	0	0	0
d__Bacteria	k__norank_d__Bacteria	p__Proteobacteria	c__Gammaproteobacteria	o__Pseudomonadales	f__Moraxellaceae	g__Acinetobacter	s__unclassified_g__Acinetobacter	ASV64428	0	0	0	0	0	0	0	0	0	0	0	0	0	0	0	0	0	0	0	0	0	0	0	0	0	0	0	0	0	0	0	0	0	0	0	0	0	0	0	0	0
d__Bacteria	k__norank_d__Bacteria	p__Chloroflexi	c__Anaerolineae	o__Anaerolineales	f__Anaerolineaceae	g__RBG-16-58-14	s__Chloroflexi_bacterium_RBG_16_58_14	ASV22224	0	0	0	0	0	0	0	0	0	0	0	18	0	0	0	1	0	5	0	0	0	0	0	0	0	0	0	0	0	0	0	0	0	0	0	0	0	0	0	0	0
d__Bacteria	k__norank_d__Bacteria	p__Acidobacteriota	c__Thermoanaerobaculia	o__Thermoanaerobaculales	f__Thermoanaerobaculaceae	g__TPD-58	s__uncultured_bacterium_g__TPD-58	ASV29666	0	0	0	0	0	0	0	0	0	0	0	0	0	0	0	0	0	0	0	0	0	0	3	0	0	0	0	0	0	0	0	0	0	0	0	0	0	0	0	0	0
d__Bacteria	k__norank_d__Bacteria	p__Proteobacteria	c__Gammaproteobacteria	o__unclassified_c__Gammaproteobacteria	f__unclassified_c__Gammaproteobacteria	g__unclassified_c__Gammaproteobacteria	s__unclassified_c__Gammaproteobacteria	ASV60344	0	0	0	0	0	0	0	0	0	0	0	0	0	0	0	0	0	0	0	0	0	0	0	0	0	0	0	0	0	0	0	0	0	0	0	0	0	0	0	0	0
d__Bacteria	k__norank_d__Bacteria	p__Actinobacteriota	c__Acidimicrobiia	o__Microtrichales	f__norank_o__Microtrichales	g__norank_o__Microtrichales	s__unclassified_g__norank_o__Microtrichales	ASV1592	0	0	0	0	0	0	0	0	0	0	0	0	0	0	0	0	0	0	0	0	0	0	0	0	0	0	0	0	0	0	0	0	0	0	0	0	0	0	0	0	0
d__Bacteria	k__norank_d__Bacteria	p__Proteobacteria	c__Gammaproteobacteria	o__Steroidobacterales	f__Steroidobacteraceae	g__norank_f__Steroidobacteraceae	s__unclassified_g__norank_f__Steroidobacteraceae	ASV1577	0	0	0	0	0	0	0	0	0	0	0	0	0	0	0	0	0	0	0	0	0	0	0	0	0	0	0	0	0	0	0	0	0	0	0	0	0	0	0	0	0
d__Bacteria	k__norank_d__Bacteria	p__unclassified_k__norank_d__Bacteria	c__unclassified_k__norank_d__Bacteria	o__unclassified_k__norank_d__Bacteria	f__unclassified_k__norank_d__Bacteria	g__unclassified_k__norank_d__Bacteria	s__unclassified_k__norank_d__Bacteria	ASV13153	0	0	0	0	0	0	0	0	0	0	0	0	2	0	0	0	0	0	0	0	0	0	0	0	0	0	0	0	0	0	0	0	0	0	0	0	0	0	0	0	0
d__Bacteria	k__norank_d__Bacteria	p__Proteobacteria	c__Gammaproteobacteria	o__Steroidobacterales	f__Woeseiaceae	g__Woeseia	s__unclassified_g__Woeseia	ASV2771	0	0	0	0	0	4	0	0	0	32	75	17	69	71	59	0	0	8	0	0	0	0	0	0	0	0	0	0	0	0	0	0	0	0	0	0	0	0	0	0	0
d__Bacteria	k__norank_d__Bacteria	p__Proteobacteria	c__Gammaproteobacteria	o__Burkholderiales	f__Burkholderiaceae	g__Lautropia	s__uncultured_beta_proteobacterium_g__Lautropia	ASV34719	0	0	0	0	0	0	0	0	0	0	0	0	0	0	0	0	0	0	0	0	0	0	0	0	0	0	0	0	0	0	0	0	0	0	0	0	0	0	0	0	0
d__Bacteria	k__norank_d__Bacteria	p__Proteobacteria	c__Alphaproteobacteria	o__Sphingomonadales	f__Sphingomonadaceae	g__Sphingomonas	s__unclassified_g__Sphingomonas	ASV47737	0	0	0	0	0	0	0	0	4	0	0	0	0	0	0	0	0	0	0	0	0	0	0	0	0	0	0	0	0	0	0	0	0	0	0	0	0	0	0	0	0
d__Bacteria	k__norank_d__Bacteria	p__unclassified_k__norank_d__Bacteria	c__unclassified_k__norank_d__Bacteria	o__unclassified_k__norank_d__Bacteria	f__unclassified_k__norank_d__Bacteria	g__unclassified_k__norank_d__Bacteria	s__unclassified_k__norank_d__Bacteria	ASV71777	0	0	0	0	0	0	0	0	0	0	1	0	0	0	0	0	0	0	0	0	0	0	0	0	0	0	0	0	0	0	0	0	0	0	0	0	0	0	0	0	0
d__Bacteria	k__norank_d__Bacteria	p__Patescibacteria	c__ABY1	o__unclassified_c__ABY1	f__unclassified_c__ABY1	g__unclassified_c__ABY1	s__unclassified_c__ABY1	ASV26327	0	0	0	0	0	0	0	0	0	0	0	0	0	0	0	0	0	0	0	0	0	3	0	0	0	0	0	0	0	0	0	0	0	0	0	0	0	0	0	0	0
d__Bacteria	k__norank_d__Bacteria	p__Proteobacteria	c__Gammaproteobacteria	o__Chromatiales	f__Chromatiaceae	g__unclassified_f__Chromatiaceae	s__unclassified_f__Chromatiaceae	ASV26125	0	0	0	0	0	0	0	0	0	0	0	0	0	0	0	0	0	0	0	0	0	4	0	0	0	0	0	0	0	0	0	0	0	0	0	0	0	0	0	0	0
d__Bacteria	k__norank_d__Bacteria	p__Patescibacteria	c__ABY1	o__Candidatus_Kerfeldbacteria	f__norank_o__Candidatus_Kerfeldbacteria	g__norank_o__Candidatus_Kerfeldbacteria	s__uncultured_bacterium_o__Candidatus_Kerfeldbacteria	ASV58442	0	0	0	0	0	0	0	0	0	0	0	0	0	0	0	0	0	0	0	0	0	0	0	0	0	0	0	0	0	0	0	0	1	0	0	0	0	0	0	0	0
d__Bacteria	k__norank_d__Bacteria	p__Myxococcota	c__Myxococcia	o__Myxococcales	f__Myxococcaceae	g__P3OB-42	s__uncultured_bacterium_g__P3OB-42	ASV64545	0	0	0	0	0	0	0	0	0	0	0	0	0	0	0	0	0	0	0	0	0	0	0	0	0	0	0	0	0	0	0	0	0	0	0	0	0	0	0	0	0
d__Bacteria	k__norank_d__Bacteria	p__Planctomycetota	c__Planctomycetes	o__Gemmatales	f__Gemmataceae	g__norank_f__Gemmataceae	s__unclassified_g__norank_f__Gemmataceae	ASV17078	0	0	0	0	0	0	0	0	0	0	0	0	0	0	0	0	0	0	0	0	0	0	0	0	0	15	3	2	0	14	0	0	0	0	0	2	0	0	0	0	0
d__Bacteria	k__norank_d__Bacteria	p__Chloroflexi	c__unclassified_p__Chloroflexi	o__unclassified_p__Chloroflexi	f__unclassified_p__Chloroflexi	g__unclassified_p__Chloroflexi	s__unclassified_p__Chloroflexi	ASV46276	0	0	0	2	0	0	0	0	0	0	0	0	0	0	0	0	0	0	0	0	0	0	0	0	0	0	0	0	0	0	0	0	0	0	0	0	0	0	0	0	0
d__Bacteria	k__norank_d__Bacteria	p__Firmicutes	c__Clostridia	o__Peptostreptococcales-Tissierellales	f__Peptostreptococcaceae	g__unclassified_f__Peptostreptococcaceae	s__unclassified_f__Peptostreptococcaceae	ASV1932	0	0	0	0	0	0	0	0	0	0	0	0	0	0	0	0	0	0	0	0	0	0	0	0	0	0	0	0	0	0	0	0	0	0	0	0	0	0	0	0	0
d__Bacteria	k__norank_d__Bacteria	p__Proteobacteria	c__Gammaproteobacteria	o__Pseudomonadales	f__Moraxellaceae	g__Acinetobacter	s__unclassified_g__Acinetobacter	ASV83971	0	0	0	0	0	0	0	0	0	0	0	0	0	0	0	0	0	0	0	0	0	0	0	0	0	0	0	0	0	0	1	0	0	0	0	0	0	0	0	0	0
d__Bacteria	k__norank_d__Bacteria	p__unclassified_k__norank_d__Bacteria	c__unclassified_k__norank_d__Bacteria	o__unclassified_k__norank_d__Bacteria	f__unclassified_k__norank_d__Bacteria	g__unclassified_k__norank_d__Bacteria	s__unclassified_k__norank_d__Bacteria	ASV82990	0	0	0	0	0	0	0	0	0	0	0	0	0	0	0	0	0	0	0	0	0	0	0	0	0	0	0	0	0	0	5	0	0	0	0	0	0	0	0	0	0
d__Bacteria	k__norank_d__Bacteria	p__Patescibacteria	c__Parcubacteria	o__unclassified_c__Parcubacteria	f__unclassified_c__Parcubacteria	g__unclassified_c__Parcubacteria	s__unclassified_c__Parcubacteria	ASV33023	0	0	0	0	0	0	0	0	0	0	0	0	0	0	0	0	0	0	0	0	0	0	0	0	0	0	0	0	0	0	0	0	0	0	0	0	0	0	0	0	0
d__Bacteria	k__norank_d__Bacteria	p__Latescibacterota	c__norank_p__Latescibacterota	o__norank_p__Latescibacterota	f__norank_p__Latescibacterota	g__norank_p__Latescibacterota	s__uncultured_proteobacterium_p__Latescibacterota	ASV10779	0	0	0	0	0	0	0	0	0	0	0	13	12	0	0	0	0	0	0	0	0	0	0	0	0	0	0	0	0	0	0	0	0	0	0	0	0	0	0	0	0
d__Bacteria	k__norank_d__Bacteria	p__Myxococcota	c__Polyangia	o__Polyangiales	f__BIrii41	g__norank_f__BIrii41	s__unclassified_g__norank_f__BIrii41	ASV65622	0	0	3	0	0	0	0	0	0	0	0	0	0	0	0	0	0	0	0	0	0	0	0	0	0	0	0	0	0	0	0	0	0	0	0	0	0	0	0	0	0
d__Bacteria	k__norank_d__Bacteria	p__Proteobacteria	c__Gammaproteobacteria	o__unclassified_c__Gammaproteobacteria	f__unclassified_c__Gammaproteobacteria	g__unclassified_c__Gammaproteobacteria	s__unclassified_c__Gammaproteobacteria	ASV41902	0	0	0	0	0	0	0	0	0	0	0	0	0	0	0	0	0	0	0	3	0	0	0	0	0	0	0	0	0	0	0	0	0	0	0	0	0	0	0	0	0
d__Bacteria	k__norank_d__Bacteria	p__Hydrogenedentes	c__Hydrogenedentia	o__Hydrogenedentiales	f__Hydrogenedensaceae	g__norank_f__Hydrogenedensaceae	s__metagenome_f__Hydrogenedensaceae	ASV12140	0	0	0	0	0	0	0	0	0	0	0	0	3	0	0	0	0	4	9	20	10	0	0	0	0	0	0	0	0	0	0	0	0	0	0	0	0	0	0	0	0
d__Bacteria	k__norank_d__Bacteria	p__Bacteroidota	c__Bacteroidia	o__unclassified_c__Bacteroidia	f__unclassified_c__Bacteroidia	g__unclassified_c__Bacteroidia	s__unclassified_c__Bacteroidia	ASV40658	0	0	0	0	0	0	0	0	0	0	0	0	0	0	0	0	0	0	0	0	0	0	0	0	0	0	0	0	0	0	0	0	0	0	0	0	0	1	0	0	0
d__Bacteria	k__norank_d__Bacteria	p__Firmicutes	c__Clostridia	o__Lachnospirales	f__Defluviitaleaceae	g__Defluviitaleaceae_UCG-011	s__uncultured_bacterium_g__Defluviitaleaceae_UCG-011	ASV61460	0	0	0	0	0	0	0	0	0	0	0	0	0	1	0	0	0	0	0	0	0	0	0	0	0	0	0	0	0	0	0	0	0	0	0	0	0	0	0	0	0
d__Bacteria	k__norank_d__Bacteria	p__Myxococcota	c__Polyangia	o__Haliangiales	f__Haliangiaceae	g__Haliangium	s__unclassified_g__Haliangium	ASV14583	0	0	0	4	0	0	10	10	7	0	0	0	0	0	0	0	0	0	0	0	0	0	0	0	0	0	0	0	0	0	0	0	0	0	0	0	0	0	0	0	0
d__Bacteria	k__norank_d__Bacteria	p__Proteobacteria	c__Alphaproteobacteria	o__unclassified_c__Alphaproteobacteria	f__unclassified_c__Alphaproteobacteria	g__unclassified_c__Alphaproteobacteria	s__unclassified_c__Alphaproteobacteria	ASV56221	0	3	0	0	0	0	0	0	0	0	0	0	0	0	0	0	0	0	0	0	0	0	0	0	0	0	0	0	0	0	0	0	0	0	0	0	0	0	0	0	0
d__Bacteria	k__norank_d__Bacteria	p__Acidobacteriota	c__Thermoanaerobaculia	o__Thermoanaerobaculales	f__Thermoanaerobaculaceae	g__Subgroup_23	s__unclassified_g__Subgroup_23	ASV5130	0	0	0	0	0	0	0	0	0	0	0	0	0	0	1	0	0	0	0	0	0	0	0	0	0	0	0	0	0	0	0	0	0	0	0	0	0	0	0	0	0
d__Bacteria	k__norank_d__Bacteria	p__unclassified_k__norank_d__Bacteria	c__unclassified_k__norank_d__Bacteria	o__unclassified_k__norank_d__Bacteria	f__unclassified_k__norank_d__Bacteria	g__unclassified_k__norank_d__Bacteria	s__unclassified_k__norank_d__Bacteria	ASV64973	0	0	0	0	0	0	0	0	0	0	0	0	0	0	0	0	0	0	0	0	0	0	0	0	0	0	0	0	0	0	0	0	0	0	0	0	0	0	0	0	0
d__Bacteria	k__norank_d__Bacteria	p__Chloroflexi	c__Anaerolineae	o__unclassified_c__Anaerolineae	f__unclassified_c__Anaerolineae	g__unclassified_c__Anaerolineae	s__unclassified_c__Anaerolineae	ASV13061	0	0	0	0	0	0	0	0	0	0	0	0	2	0	0	0	0	0	0	0	0	0	0	0	0	0	0	0	0	0	0	0	0	0	0	0	0	0	0	0	0
d__Bacteria	k__norank_d__Bacteria	p__Actinobacteriota	c__WCHB1-81	o__norank_c__WCHB1-81	f__norank_c__WCHB1-81	g__norank_c__WCHB1-81	s__uncultured_bacterium_c__WCHB1-81	ASV4071	0	0	0	0	0	0	0	0	0	0	0	0	0	0	5	0	0	0	0	0	0	0	0	0	0	0	0	0	0	0	0	0	0	0	0	0	0	0	0	0	0
d__Bacteria	k__norank_d__Bacteria	p__Myxococcota	c__Polyangia	o__Haliangiales	f__Haliangiaceae	g__Haliangium	s__unclassified_g__Haliangium	ASV82091	0	0	0	0	0	0	0	0	0	0	0	0	0	0	0	0	0	0	0	0	0	0	0	0	0	0	0	0	0	0	0	0	0	0	0	0	0	0	5	0	0
d__Bacteria	k__norank_d__Bacteria	p__Chloroflexi	c__Chloroflexia	o__Thermomicrobiales	f__JG30-KF-CM45	g__norank_f__JG30-KF-CM45	s__uncultured_bacterium_f__JG30-KF-CM45	ASV12076	20	14	10	10	0	28	0	32	11	0	2	7	3	0	0	7	0	7	0	0	3	0	0	0	0	0	0	0	0	0	0	0	0	0	0	0	0	0	0	0	0
d__Bacteria	k__norank_d__Bacteria	p__unclassified_k__norank_d__Bacteria	c__unclassified_k__norank_d__Bacteria	o__unclassified_k__norank_d__Bacteria	f__unclassified_k__norank_d__Bacteria	g__unclassified_k__norank_d__Bacteria	s__unclassified_k__norank_d__Bacteria	ASV23000	0	0	0	0	0	0	0	0	0	0	0	0	0	0	0	0	0	2	0	0	0	0	0	0	0	0	0	0	0	0	0	0	0	0	0	0	0	0	0	0	0
d__Bacteria	k__norank_d__Bacteria	p__Proteobacteria	c__Gammaproteobacteria	o__Gammaproteobacteria_Incertae_Sedis	f__unclassified_o__Gammaproteobacteria_Incertae_Sedis	g__norank_f__unclassified_o__Gammaproteobacteria_Incertae_Sedis	s__unclassified_g__norank_f__unclassified_o__Gammaproteobacteria_Incertae_Sedis	ASV87478	0	0	0	0	0	0	0	0	0	0	0	0	0	0	0	0	0	0	0	0	0	0	0	2	0	0	0	0	0	0	0	0	0	0	0	0	0	0	0	0	0
d__Bacteria	k__norank_d__Bacteria	p__Proteobacteria	c__Alphaproteobacteria	o__Rhizobiales	f__Rhizobiaceae	g__unclassified_f__Rhizobiaceae	s__unclassified_f__Rhizobiaceae	ASV82879	0	0	0	0	0	0	0	0	0	0	0	0	0	0	0	0	0	0	0	0	0	0	0	0	0	0	0	0	0	0	0	0	0	0	0	0	0	0	1	0	0
d__Bacteria	k__norank_d__Bacteria	p__Gemmatimonadota	c__BD2-11_terrestrial_group	o__norank_c__BD2-11_terrestrial_group	f__norank_c__BD2-11_terrestrial_group	g__norank_c__BD2-11_terrestrial_group	s__uncultured_bacterium_c__BD2-11_terrestrial_group	ASV97826	0	0	0	0	0	0	0	0	0	0	0	0	0	0	0	0	0	0	0	0	0	0	0	0	3	0	0	0	0	0	0	0	0	0	0	0	0	0	0	0	0
d__Bacteria	k__norank_d__Bacteria	p__Chloroflexi	c__KD4-96	o__norank_c__KD4-96	f__norank_c__KD4-96	g__norank_c__KD4-96	s__unclassified_g__norank_c__KD4-96	ASV56000	0	3	0	0	0	0	0	0	0	0	0	0	0	0	0	0	0	0	0	0	0	0	0	0	0	0	0	0	0	0	0	0	0	0	0	0	0	0	0	0	0
d__Bacteria	k__norank_d__Bacteria	p__Patescibacteria	c__Gracilibacteria	o__Candidatus_Peregrinibacteria	f__norank_o__Candidatus_Peregrinibacteria	g__norank_o__Candidatus_Peregrinibacteria	s__uncultured_bacterium_o__Candidatus_Peregrinibacteria	ASV97895	0	0	0	0	0	0	0	0	0	0	0	0	0	0	0	0	0	0	0	0	0	0	0	0	3	0	0	0	0	0	0	0	0	0	0	0	0	0	0	0	0
d__Bacteria	k__norank_d__Bacteria	p__Acidobacteriota	c__Thermoanaerobaculia	o__Thermoanaerobaculales	f__Thermoanaerobaculaceae	g__Subgroup_10	s__uncultured_bacterium_g__Subgroup_10	ASV8754	0	0	0	0	0	0	0	0	0	0	0	0	0	0	0	0	0	0	0	0	0	0	0	0	0	0	6	0	4	22	0	0	0	0	0	0	0	0	0	0	0
d__Bacteria	k__norank_d__Bacteria	p__Nitrospirota	c__Nitrospiria	o__Nitrospirales	f__Nitrospiraceae	g__Nitrospira	s__unclassified_g__Nitrospira	ASV24919	0	0	0	0	0	0	0	0	0	0	0	0	0	0	0	0	0	2	0	0	0	0	0	0	0	0	0	0	0	0	0	0	0	0	0	0	0	0	0	0	0
d__Bacteria	k__norank_d__Bacteria	p__Proteobacteria	c__Gammaproteobacteria	o__Gammaproteobacteria_Incertae_Sedis	f__unclassified_o__Gammaproteobacteria_Incertae_Sedis	g__norank_f__unclassified_o__Gammaproteobacteria_Incertae_Sedis	s__unclassified_g__norank_f__unclassified_o__Gammaproteobacteria_Incertae_Sedis	ASV16934	0	0	0	0	0	0	0	0	0	0	0	0	0	0	0	0	0	0	0	0	0	29	22	0	21	0	6	0	0	0	0	0	0	0	0	0	0	0	0	0	0
d__Bacteria	k__norank_d__Bacteria	p__Bacteroidota	c__Bacteroidia	o__Flavobacteriales	f__Flavobacteriaceae	g__Robiginitalea	s__unclassified_g__Robiginitalea	ASV30983	0	0	0	0	0	0	0	0	0	0	0	0	0	0	0	0	0	0	0	0	0	0	2	0	0	0	0	0	0	0	0	0	0	0	0	0	0	0	0	0	0
d__Bacteria	k__norank_d__Bacteria	p__Bacteroidota	c__Bacteroidia	o__unclassified_c__Bacteroidia	f__unclassified_c__Bacteroidia	g__unclassified_c__Bacteroidia	s__unclassified_c__Bacteroidia	ASV87151	0	0	0	0	0	0	0	0	0	0	0	0	0	0	0	0	0	0	0	0	0	0	0	2	0	0	0	0	0	0	0	0	0	0	0	0	0	0	0	0	0
d__Bacteria	k__norank_d__Bacteria	p__Proteobacteria	c__Gammaproteobacteria	o__Burkholderiales	f__Nitrosomonadaceae	g__MND1	s__unclassified_g__MND1	ASV22285	0	0	0	7	0	0	18	0	0	0	0	0	0	0	0	33	10	6	0	0	8	0	0	0	0	0	0	0	0	0	0	0	0	0	0	0	0	0	0	0	0
d__Bacteria	k__norank_d__Bacteria	p__Proteobacteria	c__Alphaproteobacteria	o__Rhizobiales	f__unclassified_o__Rhizobiales	g__unclassified_o__Rhizobiales	s__unclassified_o__Rhizobiales	ASV46950	0	0	0	2	0	0	0	0	0	0	0	0	0	0	0	0	0	0	0	0	0	0	0	0	0	0	0	0	0	0	0	0	0	0	0	0	0	0	0	0	0
d__Bacteria	k__norank_d__Bacteria	p__Proteobacteria	c__Gammaproteobacteria	o__unclassified_c__Gammaproteobacteria	f__unclassified_c__Gammaproteobacteria	g__unclassified_c__Gammaproteobacteria	s__unclassified_c__Gammaproteobacteria	ASV9119	0	0	0	0	0	0	0	0	0	0	0	0	0	0	0	0	0	0	0	0	0	0	0	0	0	0	0	0	3	0	0	0	0	0	0	0	0	0	0	0	0
d__Bacteria	k__norank_d__Bacteria	p__Actinobacteriota	c__Actinobacteria	o__PeM15	f__norank_o__PeM15	g__norank_o__PeM15	s__uncultured_marine_bacterium_o__PeM15	ASV50450	0	0	0	0	0	0	0	0	0	2	0	0	0	0	0	0	0	0	0	0	0	0	0	0	0	0	0	0	0	0	0	0	0	0	0	0	0	0	0	0	0
d__Bacteria	k__norank_d__Bacteria	p__Spirochaetota	c__Spirochaetia	o__Spirochaetales	f__Spirochaetaceae	g__Spirochaeta_2	s__Spirochaeta_isovalerica	ASV26864	0	0	0	0	0	0	0	0	0	0	0	0	0	0	0	0	0	0	0	0	0	2	0	0	0	0	0	0	0	0	0	0	0	0	0	0	0	0	0	0	0
d__Bacteria	k__norank_d__Bacteria	p__Chloroflexi	c__Anaerolineae	o__SBR1031	f__A4b	g__norank_f__A4b	s__unclassified_g__norank_f__A4b	ASV74874	0	0	0	0	0	2	0	0	0	0	0	0	0	0	0	0	0	0	0	0	0	0	0	0	0	0	0	0	0	0	0	0	0	0	0	0	0	0	0	0	0
d__Bacteria	k__norank_d__Bacteria	p__Desulfobacterota	c__Desulfobulbia	o__Desulfobulbales	f__Desulfocapsaceae	g__unclassified_f__Desulfocapsaceae	s__unclassified_f__Desulfocapsaceae	ASV97470	0	0	0	0	0	0	0	0	0	0	0	0	0	0	0	0	0	0	0	0	0	0	0	0	7	0	0	0	0	0	0	0	0	0	0	0	0	0	0	0	0
d__Bacteria	k__norank_d__Bacteria	p__Proteobacteria	c__Gammaproteobacteria	o__Gammaproteobacteria_Incertae_Sedis	f__unclassified_o__Gammaproteobacteria_Incertae_Sedis	g__Candidatus_Berkiella	s__unclassified_g__Candidatus_Berkiella	ASV90068	0	0	0	0	0	0	0	0	0	0	0	0	0	0	0	0	0	0	0	0	7	0	0	0	0	0	0	0	0	0	0	0	0	0	0	0	0	0	0	0	0
d__Bacteria	k__norank_d__Bacteria	p__Proteobacteria	c__Alphaproteobacteria	o__Rhizobiales	f__Rhizobiaceae	g__Cohaesibacter	s__uncultured_Alphaproteobacteria_bacterium_g__Cohaesibacter	ASV7445	0	0	0	0	0	0	0	16	0	0	0	0	0	0	0	0	0	0	0	0	0	0	0	0	0	0	0	0	30	0	0	0	0	0	0	0	0	0	19	0	0
d__Bacteria	k__norank_d__Bacteria	p__NB1-j	c__norank_p__NB1-j	o__norank_p__NB1-j	f__norank_p__NB1-j	g__norank_p__NB1-j	s__unclassified_g__norank_p__NB1-j	ASV13332	0	0	0	0	0	0	0	0	0	0	0	0	2	0	0	0	0	0	0	0	0	0	0	0	0	0	0	0	0	0	0	0	0	0	0	0	0	0	0	0	0
d__Bacteria	k__norank_d__Bacteria	p__Nitrospirota	c__Thermodesulfovibrionia	o__norank_c__Thermodesulfovibrionia	f__norank_c__Thermodesulfovibrionia	g__norank_c__Thermodesulfovibrionia	s__unclassified_g__norank_c__Thermodesulfovibrionia	ASV49416	0	0	0	0	0	0	0	0	0	5	0	0	0	0	0	0	0	0	0	0	0	0	0	0	0	0	0	0	0	0	0	0	0	0	0	0	0	0	0	0	0
d__Bacteria	k__norank_d__Bacteria	p__Chloroflexi	c__Anaerolineae	o__SBR1031	f__norank_o__SBR1031	g__norank_o__SBR1031	s__unclassified_g__norank_o__SBR1031	ASV31159	0	0	0	0	0	0	0	0	0	0	0	0	0	0	0	0	0	0	0	0	0	0	0	0	0	0	0	0	0	0	0	0	0	0	0	0	9	0	0	0	0
d__Bacteria	k__norank_d__Bacteria	p__Myxococcota	c__Polyangia	o__Haliangiales	f__Haliangiaceae	g__Haliangium	s__unclassified_g__Haliangium	ASV70546	0	0	0	0	0	0	0	0	0	0	4	0	0	0	0	0	0	0	0	0	0	0	0	0	0	0	0	0	0	0	0	0	0	0	0	0	0	0	0	0	0
d__Bacteria	k__norank_d__Bacteria	p__Verrucomicrobiota	c__unclassified_p__Verrucomicrobiota	o__unclassified_p__Verrucomicrobiota	f__unclassified_p__Verrucomicrobiota	g__unclassified_p__Verrucomicrobiota	s__unclassified_p__Verrucomicrobiota	ASV71339	0	0	0	0	0	0	0	0	0	0	2	0	0	0	0	0	0	0	0	0	0	0	0	0	0	0	0	0	0	0	0	0	0	0	0	0	0	0	0	0	0
d__Bacteria	k__norank_d__Bacteria	p__Firmicutes	c__Bacilli	o__Bacillales	f__Bacillaceae	g__Bacillus	s__unclassified_g__Bacillus	ASV49665	0	0	0	0	0	0	0	0	0	4	0	0	0	0	0	0	0	0	0	0	0	0	0	0	0	0	0	0	0	0	0	0	0	0	0	0	0	0	0	0	0
d__Bacteria	k__norank_d__Bacteria	p__Bdellovibrionota	c__Oligoflexia	o__Oligoflexales	f__norank_o__Oligoflexales	g__norank_o__Oligoflexales	s__unclassified_g__norank_o__Oligoflexales	ASV50994	0	0	0	0	2	0	0	0	0	0	0	0	0	0	0	0	0	0	0	0	0	0	0	0	0	0	0	0	0	0	0	0	0	0	0	0	0	0	0	0	0
d__Bacteria	k__norank_d__Bacteria	p__Cyanobacteria	c__Cyanobacteriia	o__Cyanobacteriales	f__Nostocaceae	g__Nostoc_PCC-7524	s__unclassified_g__Nostoc_PCC-7524	ASV88641	0	0	0	0	0	0	0	0	0	0	0	0	0	0	0	0	0	0	0	0	0	0	0	0	0	0	0	0	0	0	0	0	0	0	0	0	0	0	0	0	0
d__Bacteria	k__norank_d__Bacteria	p__Proteobacteria	c__unclassified_p__Proteobacteria	o__unclassified_p__Proteobacteria	f__unclassified_p__Proteobacteria	g__unclassified_p__Proteobacteria	s__unclassified_p__Proteobacteria	ASV99326	0	0	0	0	0	0	0	0	0	0	0	0	0	0	0	0	4	0	0	0	0	0	0	0	0	0	0	0	0	0	0	0	0	0	0	0	0	0	0	0	0
d__Bacteria	k__norank_d__Bacteria	p__Chloroflexi	c__Anaerolineae	o__Anaerolineales	f__Anaerolineaceae	g__norank_f__Anaerolineaceae	s__unclassified_g__norank_f__Anaerolineaceae	ASV54659	0	0	0	0	0	0	0	0	0	0	0	0	0	0	0	0	0	0	0	0	0	0	0	0	0	0	0	0	0	0	0	0	0	0	0	0	0	0	0	0	0
d__Bacteria	k__norank_d__Bacteria	p__Myxococcota	c__Polyangia	o__Polyangiales	f__Phaselicystidaceae	g__Phaselicystis	s__uncultured_bacterium_g__Phaselicystis	ASV67254	0	0	0	0	0	0	0	0	0	0	0	0	0	0	0	11	0	0	0	0	0	0	0	0	0	0	0	0	0	0	0	0	0	0	0	0	0	0	0	0	0
d__Bacteria	k__norank_d__Bacteria	p__Verrucomicrobiota	c__Verrucomicrobiae	o__Verrucomicrobiales	f__Rubritaleaceae	g__Luteolibacter	s__unclassified_g__Luteolibacter	ASV5603	0	0	0	0	0	0	0	0	0	0	0	0	0	0	2	0	0	0	0	0	0	0	0	0	0	0	0	0	0	0	0	0	0	0	0	0	0	0	0	0	0
d__Bacteria	k__norank_d__Bacteria	p__Bacteroidota	c__Bacteroidia	o__Chitinophagales	f__Saprospiraceae	g__unclassified_f__Saprospiraceae	s__unclassified_f__Saprospiraceae	ASV98641	0	0	0	0	0	0	0	0	0	0	0	0	0	0	0	0	9	0	0	0	0	0	0	0	0	0	0	0	0	0	0	0	0	0	0	0	0	0	0	0	0
d__Bacteria	k__norank_d__Bacteria	p__Proteobacteria	c__Alphaproteobacteria	o__Rhodobacterales	f__Rhodobacteraceae	g__norank_f__Rhodobacteraceae	s__uncultured_Rhodobacterales_bacterium_f__Rhodobacteraceae	ASV14859	0	0	0	0	0	0	0	7	0	0	0	0	0	0	0	1	0	0	0	0	0	0	0	0	0	0	0	0	0	0	0	0	0	0	0	0	0	0	0	0	0
d__Bacteria	k__norank_d__Bacteria	p__Myxococcota	c__Myxococcia	o__Myxococcales	f__Myxococcaceae	g__P3OB-42	s__unclassified_g__P3OB-42	ASV63152	0	0	0	0	0	0	0	0	0	0	0	0	0	0	0	0	0	0	0	0	0	0	0	0	0	0	0	0	0	0	0	0	0	0	0	2	0	0	0	0	0
d__Bacteria	k__norank_d__Bacteria	p__unclassified_k__norank_d__Bacteria	c__unclassified_k__norank_d__Bacteria	o__unclassified_k__norank_d__Bacteria	f__unclassified_k__norank_d__Bacteria	g__unclassified_k__norank_d__Bacteria	s__unclassified_k__norank_d__Bacteria	ASV58789	0	0	0	0	0	0	0	0	0	0	0	0	0	0	0	0	0	0	0	0	0	0	0	0	0	0	0	0	0	0	0	0	1	0	0	0	0	0	0	0	0
d__Bacteria	k__norank_d__Bacteria	p__Acidobacteriota	c__Thermoanaerobaculia	o__Thermoanaerobaculales	f__Thermoanaerobaculaceae	g__Subgroup_10	s__uncultured_bacterium_g__Subgroup_10	ASV9355	0	0	0	0	0	0	0	0	0	0	0	0	0	0	0	0	0	0	0	0	0	0	0	0	0	0	0	0	2	0	0	0	0	0	0	0	0	0	0	0	0
d__Bacteria	k__norank_d__Bacteria	p__Fusobacteriota	c__Fusobacteriia	o__Fusobacteriales	f__Fusobacteriaceae	g__Cetobacterium	s__uncultured_bacterium_g__Cetobacterium	ASV53977	0	0	0	0	0	0	0	0	0	0	0	0	0	0	0	0	0	0	0	0	0	0	0	0	0	0	0	0	0	0	0	0	0	0	0	0	0	0	0	0	0
d__Bacteria	k__norank_d__Bacteria	p__Proteobacteria	c__Gammaproteobacteria	o__Burkholderiales	f__Comamonadaceae	g__unclassified_f__Comamonadaceae	s__unclassified_f__Comamonadaceae	ASV11776	0	0	0	0	0	0	0	0	0	0	0	0	4	0	0	0	0	0	0	0	0	0	0	0	0	0	0	0	0	0	0	0	0	0	0	0	0	0	0	0	0
d__Bacteria	k__norank_d__Bacteria	p__Firmicutes	c__Bacilli	o__Bacillales	f__Bacillaceae	g__Bacillus	s__unclassified_g__Bacillus	ASV75451	0	0	0	0	0	0	0	0	0	0	0	0	0	0	0	0	0	0	0	0	0	0	0	0	0	0	0	0	0	0	0	0	0	0	0	0	0	0	0	4	0
d__Bacteria	k__norank_d__Bacteria	p__Chloroflexi	c__Anaerolineae	o__unclassified_c__Anaerolineae	f__unclassified_c__Anaerolineae	g__unclassified_c__Anaerolineae	s__unclassified_c__Anaerolineae	ASV85480	0	0	0	0	0	0	0	0	0	0	0	0	0	0	0	0	0	0	0	0	0	0	0	0	0	0	0	0	0	0	0	0	0	0	0	0	0	0	0	0	0
d__Bacteria	k__norank_d__Bacteria	p__Proteobacteria	c__Alphaproteobacteria	o__Rhizobiales	f__unclassified_o__Rhizobiales	g__unclassified_o__Rhizobiales	s__unclassified_o__Rhizobiales	ASV43047	0	0	0	0	0	0	0	0	0	0	0	0	0	0	0	0	0	0	0	1	0	0	0	0	0	0	0	0	0	0	0	0	0	0	0	0	0	0	0	0	0
d__Bacteria	k__norank_d__Bacteria	p__Firmicutes	c__Clostridia	o__Peptostreptococcales-Tissierellales	f__Fusibacteraceae	g__Fusibacter	s__uncultured_bacterium_g__Fusibacter	ASV36538	0	0	0	0	0	0	0	0	0	0	0	0	0	0	0	0	0	0	0	0	0	0	0	0	6	1	0	0	0	2	0	0	0	0	0	0	0	0	0	0	0
d__Bacteria	k__norank_d__Bacteria	p__Desulfobacterota	c__Desulfobulbia	o__Desulfobulbales	f__Desulfocapsaceae	g__unclassified_f__Desulfocapsaceae	s__unclassified_f__Desulfocapsaceae	ASV39996	0	0	0	0	0	6	0	0	0	0	0	0	0	0	0	0	0	0	0	0	0	0	0	0	0	0	0	0	0	7	0	0	0	0	0	0	0	3	0	0	0
d__Bacteria	k__norank_d__Bacteria	p__Proteobacteria	c__Gammaproteobacteria	o__unclassified_c__Gammaproteobacteria	f__unclassified_c__Gammaproteobacteria	g__unclassified_c__Gammaproteobacteria	s__unclassified_c__Gammaproteobacteria	ASV79594	0	0	0	0	0	0	0	0	0	0	0	0	0	0	0	0	0	0	0	0	0	0	0	0	0	0	0	0	0	0	0	1	0	0	0	0	0	0	0	0	0
d__Bacteria	k__norank_d__Bacteria	p__Proteobacteria	c__Gammaproteobacteria	o__Alteromonadales	f__Marinobacteraceae	g__Marinobacter	s__unclassified_g__Marinobacter	ASV48792	0	0	0	0	0	0	0	0	0	11	0	0	0	0	0	0	0	0	0	0	0	0	0	0	0	0	0	0	0	0	0	0	0	0	0	0	0	0	0	0	0
d__Bacteria	k__norank_d__Bacteria	p__Chloroflexi	c__Anaerolineae	o__norank_c__Anaerolineae	f__norank_c__Anaerolineae	g__norank_c__Anaerolineae	s__unclassified_g__norank_c__Anaerolineae	ASV9925	0	0	0	0	0	0	0	0	0	0	0	0	0	0	0	0	0	0	0	0	0	0	0	0	0	0	0	0	2	0	0	0	0	0	0	0	0	0	0	0	0
d__Bacteria	k__norank_d__Bacteria	p__Proteobacteria	c__Gammaproteobacteria	o__Gammaproteobacteria_Incertae_Sedis	f__unclassified_o__Gammaproteobacteria_Incertae_Sedis	g__norank_f__unclassified_o__Gammaproteobacteria_Incertae_Sedis	s__unclassified_g__norank_f__unclassified_o__Gammaproteobacteria_Incertae_Sedis	ASV53131	2	0	0	0	0	0	0	0	0	0	0	0	0	0	0	0	0	0	0	0	0	0	0	0	0	0	0	0	0	0	0	0	0	0	0	0	0	0	0	0	0
d__Bacteria	k__norank_d__Bacteria	p__unclassified_k__norank_d__Bacteria	c__unclassified_k__norank_d__Bacteria	o__unclassified_k__norank_d__Bacteria	f__unclassified_k__norank_d__Bacteria	g__unclassified_k__norank_d__Bacteria	s__unclassified_k__norank_d__Bacteria	ASV39274	0	0	0	0	0	0	0	0	0	0	0	0	0	0	0	0	0	0	2	0	0	0	0	0	0	0	0	0	0	0	0	0	0	0	0	0	0	0	0	0	0
d__Bacteria	k__norank_d__Bacteria	p__Bacteroidota	c__Bacteroidia	o__Bacteroidales	f__SB-5	g__norank_f__SB-5	s__uncultured_bacterium_f__SB-5	ASV41801	0	0	0	0	0	0	0	0	0	0	0	0	0	0	0	0	0	0	0	3	0	0	0	0	0	0	0	0	0	0	0	0	0	0	0	0	0	0	0	0	0
d__Bacteria	k__norank_d__Bacteria	p__Proteobacteria	c__Gammaproteobacteria	o__Burkholderiales	f__Nitrosomonadaceae	g__Nitrosomonas	s__unclassified_g__Nitrosomonas	ASV5788	0	0	0	0	0	0	0	0	0	7	3	3	0	0	2	0	0	0	0	0	0	0	0	0	0	0	0	0	0	0	0	0	0	0	0	0	0	0	0	0	0
d__Bacteria	k__norank_d__Bacteria	p__Verrucomicrobiota	c__Chlamydiae	o__Chlamydiales	f__unclassified_o__Chlamydiales	g__unclassified_o__Chlamydiales	s__unclassified_o__Chlamydiales	ASV9727	0	0	0	0	0	0	0	0	0	0	0	0	0	0	0	0	0	0	0	0	0	0	0	0	0	0	0	0	2	0	0	0	0	0	0	0	0	0	0	0	0
d__Bacteria	k__norank_d__Bacteria	p__Proteobacteria	c__Gammaproteobacteria	o__unclassified_c__Gammaproteobacteria	f__unclassified_c__Gammaproteobacteria	g__unclassified_c__Gammaproteobacteria	s__unclassified_c__Gammaproteobacteria	ASV48818	0	0	0	0	0	0	0	0	0	13	0	3	0	0	0	0	0	0	0	0	0	0	0	0	0	0	0	0	0	0	0	0	0	0	0	0	0	0	0	0	0
d__Bacteria	k__norank_d__Bacteria	p__Acidobacteriota	c__Vicinamibacteria	o__Vicinamibacterales	f__norank_o__Vicinamibacterales	g__norank_o__Vicinamibacterales	s__unclassified_g__norank_o__Vicinamibacterales	ASV97015	0	0	0	0	0	0	0	0	0	0	0	0	0	0	0	0	0	0	0	0	0	0	0	0	0	0	0	0	0	0	0	0	0	0	0	0	0	0	0	0	2
d__Bacteria	k__norank_d__Bacteria	p__Proteobacteria	c__Gammaproteobacteria	o__unclassified_c__Gammaproteobacteria	f__unclassified_c__Gammaproteobacteria	g__unclassified_c__Gammaproteobacteria	s__unclassified_c__Gammaproteobacteria	ASV23293	0	0	0	0	0	0	0	0	0	0	0	0	0	0	0	0	0	3	0	0	0	0	0	0	0	0	0	0	0	0	0	0	0	0	0	0	0	0	0	0	0
d__Bacteria	k__norank_d__Bacteria	p__NB1-j	c__norank_p__NB1-j	o__norank_p__NB1-j	f__norank_p__NB1-j	g__norank_p__NB1-j	s__uncultured_bacterium_p__NB1-j	ASV3610	0	0	0	0	0	0	0	0	0	0	0	0	0	0	9	0	0	0	0	0	0	0	0	0	0	0	0	0	0	0	0	0	0	0	0	0	0	0	0	0	0
d__Bacteria	k__norank_d__Bacteria	p__Proteobacteria	c__Alphaproteobacteria	o__Sphingomonadales	f__Sphingomonadaceae	g__unclassified_f__Sphingomonadaceae	s__unclassified_f__Sphingomonadaceae	ASV39867	0	0	0	0	0	0	0	0	0	0	0	0	0	0	0	0	0	0	0	0	0	0	0	0	0	0	0	0	0	0	7	7	0	0	0	2	0	8	0	0	0
d__Bacteria	k__norank_d__Bacteria	p__Desulfobacterota	c__Desulfobacteria	o__Desulfobacterales	f__unclassified_o__Desulfobacterales	g__unclassified_o__Desulfobacterales	s__unclassified_o__Desulfobacterales	ASV20232	0	0	0	0	0	0	0	0	0	0	0	0	0	0	0	0	0	0	0	0	0	0	0	0	0	0	0	0	0	0	0	0	0	0	3	2	0	0	0	0	0
d__Bacteria	k__norank_d__Bacteria	p__Acidobacteriota	c__Vicinamibacteria	o__unclassified_c__Vicinamibacteria	f__unclassified_c__Vicinamibacteria	g__unclassified_c__Vicinamibacteria	s__unclassified_c__Vicinamibacteria	ASV56762	0	2	0	0	0	0	0	0	0	0	0	0	0	0	0	0	0	0	0	0	0	0	0	0	0	0	0	0	0	0	0	0	0	0	0	0	0	0	0	0	0
d__Bacteria	k__norank_d__Bacteria	p__Proteobacteria	c__Gammaproteobacteria	o__unclassified_c__Gammaproteobacteria	f__unclassified_c__Gammaproteobacteria	g__unclassified_c__Gammaproteobacteria	s__unclassified_c__Gammaproteobacteria	ASV84382	0	0	0	0	0	0	0	0	0	0	0	0	0	0	0	0	0	0	0	0	0	0	0	0	0	0	0	0	0	0	2	0	0	0	0	0	0	0	0	0	0
d__Bacteria	k__norank_d__Bacteria	p__Desulfobacterota	c__Syntrophobacteria	o__Syntrophobacterales	f__norank_o__Syntrophobacterales	g__norank_o__Syntrophobacterales	s__uncultured_bacterium_o__Syntrophobacterales	ASV26108	0	0	0	0	0	0	0	0	0	0	0	0	0	0	0	0	0	0	0	0	0	4	0	0	0	0	0	0	0	0	0	0	0	0	0	0	0	0	0	0	0
d__Bacteria	k__norank_d__Bacteria	p__Firmicutes	c__Clostridia	o__Peptostreptococcales-Tissierellales	f__Peptostreptococcaceae	g__Tepidibacter	s__unclassified_g__Tepidibacter	ASV47357	0	0	0	2	0	0	0	0	0	0	0	0	0	0	0	0	0	0	0	0	0	0	0	0	0	0	0	0	0	0	0	0	0	0	0	0	0	0	0	0	0
d__Bacteria	k__norank_d__Bacteria	p__Chloroflexi	c__KD4-96	o__norank_c__KD4-96	f__norank_c__KD4-96	g__norank_c__KD4-96	s__unclassified_g__norank_c__KD4-96	ASV67593	0	0	0	0	0	0	0	0	0	0	0	0	0	0	0	5	0	0	0	0	0	0	0	0	0	0	0	0	0	0	0	0	0	0	0	0	0	0	0	0	0
d__Bacteria	k__norank_d__Bacteria	p__Planctomycetota	c__OM190	o__norank_c__OM190	f__norank_c__OM190	g__norank_c__OM190	s__unclassified_g__norank_c__OM190	ASV98393	0	0	0	0	0	0	0	0	0	0	0	0	0	0	0	0	0	0	0	0	0	0	0	0	2	0	0	0	0	0	0	0	0	0	0	0	0	0	0	0	0
d__Bacteria	k__norank_d__Bacteria	p__Bacteroidota	c__Bacteroidia	o__Bacteroidales	f__Bacteroidetes_vadinHA17	g__norank_f__Bacteroidetes_vadinHA17	s__unclassified_g__norank_f__Bacteroidetes_vadinHA17	ASV3498	0	0	0	0	0	0	0	0	0	0	5	0	8	0	9	0	0	0	0	0	0	0	0	0	0	0	0	0	0	0	0	0	0	0	0	0	0	0	0	0	0
d__Bacteria	k__norank_d__Bacteria	p__Gemmatimonadota	c__BD2-11_terrestrial_group	o__norank_c__BD2-11_terrestrial_group	f__norank_c__BD2-11_terrestrial_group	g__norank_c__BD2-11_terrestrial_group	s__uncultured_bacterium_c__BD2-11_terrestrial_group	ASV67644	0	0	0	0	0	0	0	0	0	0	0	0	0	0	0	5	0	0	0	0	0	0	0	0	0	0	0	0	0	0	0	0	0	0	0	0	0	0	0	0	0
d__Bacteria	k__norank_d__Bacteria	p__Bacteroidota	c__Bacteroidia	o__Chitinophagales	f__Saprospiraceae	g__norank_f__Saprospiraceae	s__unclassified_g__norank_f__Saprospiraceae	ASV36242	0	0	0	0	0	0	0	0	0	0	0	0	0	0	0	0	0	0	0	0	0	0	0	0	0	0	0	6	0	0	0	0	0	0	0	0	0	0	0	0	0
d__Bacteria	k__norank_d__Bacteria	p__Bacteroidota	c__Bacteroidia	o__unclassified_c__Bacteroidia	f__unclassified_c__Bacteroidia	g__unclassified_c__Bacteroidia	s__unclassified_c__Bacteroidia	ASV46741	0	0	0	2	0	0	0	0	0	0	0	0	0	0	0	0	0	0	0	0	0	0	0	0	0	0	0	0	0	0	0	0	0	0	0	0	0	0	0	0	0
d__Bacteria	k__norank_d__Bacteria	p__Desulfobacterota	c__Desulfobacteria	o__Desulfobacterales	f__Desulfosarcinaceae	g__unclassified_f__Desulfosarcinaceae	s__unclassified_f__Desulfosarcinaceae	ASV13897	69	84	79	107	0	155	39	60	102	0	0	0	0	0	0	60	14	0	0	0	0	0	0	0	0	0	0	0	0	0	0	0	0	0	0	0	0	0	0	0	0
d__Bacteria	k__norank_d__Bacteria	p__Chloroflexi	c__Anaerolineae	o__SBR1031	f__norank_o__SBR1031	g__norank_o__SBR1031	s__unclassified_g__norank_o__SBR1031	ASV40216	0	0	0	0	0	0	0	0	0	0	0	0	0	0	0	0	0	0	0	0	0	0	0	0	0	0	0	0	0	0	0	0	0	0	0	0	0	2	0	0	0
d__Bacteria	k__norank_d__Bacteria	p__Proteobacteria	c__Alphaproteobacteria	o__unclassified_c__Alphaproteobacteria	f__unclassified_c__Alphaproteobacteria	g__unclassified_c__Alphaproteobacteria	s__unclassified_c__Alphaproteobacteria	ASV30244	0	0	0	0	0	0	0	0	0	0	0	0	0	0	0	0	0	0	0	0	0	0	2	0	0	0	0	0	0	0	0	0	0	0	0	0	0	0	0	0	0
d__Bacteria	k__norank_d__Bacteria	p__Desulfobacterota	c__Desulfuromonadia	o__Bradymonadales	f__norank_o__Bradymonadales	g__norank_o__Bradymonadales	s__unclassified_g__norank_o__Bradymonadales	ASV15428	0	0	0	0	0	0	0	3	0	0	0	0	0	0	0	0	0	0	0	0	0	0	0	0	0	0	0	0	0	0	0	0	0	0	0	0	0	0	0	0	0
d__Bacteria	k__norank_d__Bacteria	p__Desulfobacterota	c__Desulfomonilia	o__Desulfomonilales	f__Desulfomonilaceae	g__Desulfomonile	s__uncultured_bacterium_g__Desulfomonile	ASV34918	0	0	0	0	0	0	0	0	0	0	0	0	0	0	0	0	0	0	0	0	0	0	0	0	0	0	0	0	0	0	0	0	0	0	0	0	0	0	0	0	0
d__Bacteria	k__norank_d__Bacteria	p__Actinobacteriota	c__Acidimicrobiia	o__Actinomarinales	f__norank_o__Actinomarinales	g__norank_o__Actinomarinales	s__unclassified_g__norank_o__Actinomarinales	ASV16736	0	0	0	0	0	0	0	0	0	0	0	0	0	0	0	0	0	0	0	0	0	0	0	0	0	0	6	0	0	0	0	0	0	0	0	0	0	0	0	0	0
d__Bacteria	k__norank_d__Bacteria	p__Actinobacteriota	c__Acidimicrobiia	o__Microtrichales	f__Microtrichaceae	g__Sva0996_marine_group	s__unclassified_g__Sva0996_marine_group	ASV92718	0	0	0	0	0	0	0	0	0	0	0	5	0	0	0	0	0	0	0	0	0	0	0	0	0	0	0	0	0	0	0	0	0	0	0	0	0	0	0	0	0
d__Bacteria	k__norank_d__Bacteria	p__Patescibacteria	c__Dojkabacteria	o__norank_c__Dojkabacteria	f__norank_c__Dojkabacteria	g__norank_c__Dojkabacteria	s__uncultured_anaerobic_bacterium_c__Dojkabacteria	ASV94831	0	0	0	0	0	0	0	0	0	0	0	0	0	0	0	0	0	0	0	0	0	0	0	0	0	0	0	0	0	0	0	0	0	0	0	0	0	0	0	0	0
d__Bacteria	k__norank_d__Bacteria	p__Myxococcota	c__Polyangia	o__UASB-TL25	f__norank_o__UASB-TL25	g__norank_o__UASB-TL25	s__uncultured_bacterium_o__UASB-TL25	ASV33600	0	0	0	0	0	0	0	0	0	0	0	0	0	0	0	0	0	0	4	0	0	0	0	0	0	0	0	0	0	0	0	0	0	0	0	0	0	0	0	3	0
d__Bacteria	k__norank_d__Bacteria	p__Proteobacteria	c__Gammaproteobacteria	o__norank_c__Gammaproteobacteria	f__norank_c__Gammaproteobacteria	g__norank_c__Gammaproteobacteria	s__unclassified_g__norank_c__Gammaproteobacteria	ASV82901	0	0	0	0	0	0	0	0	0	0	0	0	0	0	0	0	0	0	0	0	0	0	0	0	0	0	0	0	0	0	0	0	0	0	0	0	0	0	1	0	0
d__Bacteria	k__norank_d__Bacteria	p__Actinobacteriota	c__Actinobacteria	o__Corynebacteriales	f__Mycobacteriaceae	g__Mycobacterium	s__unclassified_g__Mycobacterium	ASV95636	0	0	0	0	0	0	0	0	0	0	0	0	0	0	0	0	0	0	0	0	0	0	0	0	0	0	0	0	0	0	0	0	0	0	0	0	0	0	0	0	0
d__Bacteria	k__norank_d__Bacteria	p__unclassified_k__norank_d__Bacteria	c__unclassified_k__norank_d__Bacteria	o__unclassified_k__norank_d__Bacteria	f__unclassified_k__norank_d__Bacteria	g__unclassified_k__norank_d__Bacteria	s__unclassified_k__norank_d__Bacteria	ASV97280	0	0	0	0	0	0	0	0	0	0	0	0	0	0	0	0	0	0	0	0	0	0	0	0	0	0	0	0	0	0	0	0	0	0	0	0	0	0	0	0	2
d__Bacteria	k__norank_d__Bacteria	p__Proteobacteria	c__Gammaproteobacteria	o__Cellvibrionales	f__Halieaceae	g__unclassified_f__Halieaceae	s__unclassified_f__Halieaceae	ASV83667	0	0	0	0	0	0	0	0	0	0	0	0	0	0	0	0	0	0	0	0	0	0	0	0	0	0	0	0	0	0	1	0	0	0	0	0	0	0	0	0	0
d__Bacteria	k__norank_d__Bacteria	p__Chloroflexi	c__Anaerolineae	o__SBR1031	f__A4b	g__norank_f__A4b	s__unclassified_g__norank_f__A4b	ASV76428	0	0	0	0	0	0	0	0	0	0	0	0	0	0	0	0	0	0	0	0	0	0	0	0	0	0	0	0	0	0	0	0	0	0	0	0	0	0	0	1	0
d__Bacteria	k__norank_d__Bacteria	p__Acidobacteriota	c__Thermoanaerobaculia	o__Thermoanaerobaculales	f__Thermoanaerobaculaceae	g__Subgroup_10	s__uncultured_bacterium_g__Subgroup_10	ASV66483	0	0	1	0	0	2	0	0	0	0	0	0	0	0	0	0	0	0	0	0	0	0	0	0	0	0	0	0	0	0	0	0	0	0	0	0	0	0	0	0	0
d__Bacteria	k__norank_d__Bacteria	p__Desulfobacterota	c__Desulfobacteria	o__Desulfobacterales	f__Desulfosarcinaceae	g__Desulfosarcina	s__unclassified_g__Desulfosarcina	ASV98968	0	0	0	0	0	0	0	0	0	0	0	0	0	0	0	0	5	0	0	0	0	0	0	0	0	0	0	0	0	0	0	0	0	0	0	0	0	0	0	0	0
d__Bacteria	k__norank_d__Bacteria	p__Spirochaetota	c__Leptospirae	o__Leptospirales	f__Leptospiraceae	g__RBG-16-49-21	s__unclassified_g__RBG-16-49-21	ASV25454	0	0	0	0	0	0	0	0	0	0	0	0	0	0	0	0	0	0	0	0	0	5	0	0	11	0	0	0	0	0	0	0	0	0	0	0	0	0	0	0	0
d__Bacteria	k__norank_d__Bacteria	p__Verrucomicrobiota	c__Verrucomicrobiae	o__Pedosphaerales	f__Pedosphaeraceae	g__norank_f__Pedosphaeraceae	s__unclassified_g__norank_f__Pedosphaeraceae	ASV91525	0	0	0	0	0	0	0	0	0	0	0	0	0	0	0	0	0	0	0	0	2	0	0	0	0	0	0	0	0	0	0	0	0	0	0	0	0	0	0	0	0
d__Bacteria	k__norank_d__Bacteria	p__Proteobacteria	c__Gammaproteobacteria	o__unclassified_c__Gammaproteobacteria	f__unclassified_c__Gammaproteobacteria	g__unclassified_c__Gammaproteobacteria	s__unclassified_c__Gammaproteobacteria	ASV86258	0	0	0	0	0	0	0	0	0	0	0	0	0	0	0	0	0	0	0	0	0	0	0	0	0	0	0	0	0	0	0	0	0	0	0	0	0	0	0	0	0
d__Bacteria	k__norank_d__Bacteria	p__Methylomirabilota	c__Methylomirabilia	o__Rokubacteriales	f__WX65	g__norank_f__WX65	s__unclassified_g__norank_f__WX65	ASV45092	0	0	0	5	0	0	0	0	0	0	0	0	0	0	0	0	0	0	0	0	0	0	0	0	0	0	0	0	0	0	0	0	0	0	0	0	0	0	0	0	0
d__Bacteria	k__norank_d__Bacteria	p__unclassified_k__norank_d__Bacteria	c__unclassified_k__norank_d__Bacteria	o__unclassified_k__norank_d__Bacteria	f__unclassified_k__norank_d__Bacteria	g__unclassified_k__norank_d__Bacteria	s__unclassified_k__norank_d__Bacteria	ASV82643	0	0	0	0	0	0	0	0	0	0	0	0	0	0	0	0	0	0	0	0	0	0	0	0	0	0	0	0	0	0	0	0	0	0	0	0	0	0	2	0	0
d__Bacteria	k__norank_d__Bacteria	p__Firmicutes	c__Clostridia	o__Clostridiales	f__Clostridiaceae	g__Clostridium_sensu_stricto_8	s__unclassified_g__Clostridium_sensu_stricto_8	ASV50634	0	0	0	0	8	0	0	0	0	0	0	0	0	0	0	0	0	0	0	0	0	0	0	0	0	0	0	0	0	0	0	0	0	0	0	0	0	0	0	0	0
d__Bacteria	k__norank_d__Bacteria	p__Firmicutes	c__Clostridia	o__Clostridiales	f__Clostridiaceae	g__Clostridium_sensu_stricto_13	s__unclassified_g__Clostridium_sensu_stricto_13	ASV27655	0	0	0	0	0	0	0	0	0	0	0	0	0	0	0	0	0	0	0	0	0	0	0	0	0	0	0	0	0	0	0	0	0	10	0	0	0	0	0	0	0
d__Bacteria	k__norank_d__Bacteria	p__Acidobacteriota	c__Thermoanaerobaculia	o__Thermoanaerobaculales	f__Thermoanaerobaculaceae	g__Subgroup_10	s__unclassified_g__Subgroup_10	ASV23766	0	0	0	0	0	0	0	0	0	0	0	0	0	0	0	0	0	2	0	0	0	0	0	0	0	0	0	0	0	0	0	0	0	0	0	0	0	0	0	0	0
d__Bacteria	k__norank_d__Bacteria	p__Chloroflexi	c__Anaerolineae	o__unclassified_c__Anaerolineae	f__unclassified_c__Anaerolineae	g__unclassified_c__Anaerolineae	s__unclassified_c__Anaerolineae	ASV68215	0	0	0	0	0	0	0	0	0	0	0	0	0	0	0	3	0	0	0	0	0	0	0	0	0	0	0	0	0	0	0	0	0	0	0	0	0	0	0	0	0
d__Bacteria	k__norank_d__Bacteria	p__Patescibacteria	c__Saccharimonadia	o__Saccharimonadales	f__norank_o__Saccharimonadales	g__norank_o__Saccharimonadales	s__unclassified_g__norank_o__Saccharimonadales	ASV10821	0	0	0	0	0	0	0	0	0	0	0	0	11	0	0	0	0	0	0	0	0	0	0	0	0	0	0	0	0	0	0	0	0	0	0	0	0	0	0	0	0
d__Bacteria	k__norank_d__Bacteria	p__Proteobacteria	c__Gammaproteobacteria	o__Gammaproteobacteria_Incertae_Sedis	f__unclassified_o__Gammaproteobacteria_Incertae_Sedis	g__norank_f__unclassified_o__Gammaproteobacteria_Incertae_Sedis	s__unclassified_g__norank_f__unclassified_o__Gammaproteobacteria_Incertae_Sedis	ASV57691	0	0	0	0	0	0	0	0	0	0	0	0	0	0	0	0	0	0	0	0	0	0	0	0	0	0	0	0	0	0	0	0	4	0	0	0	0	0	0	0	0
d__Bacteria	k__norank_d__Bacteria	p__Desulfobacterota	c__Desulfomonilia	o__Desulfomonilales	f__Desulfomonilaceae	g__Desulfomonile	s__unclassified_g__Desulfomonile	ASV98056	0	0	0	0	0	0	0	0	0	0	0	0	0	0	0	0	0	0	0	0	0	0	0	0	2	0	0	0	0	0	0	0	0	0	0	0	0	0	0	0	0
d__Bacteria	k__norank_d__Bacteria	p__Chloroflexi	c__Anaerolineae	o__Anaerolineales	f__Anaerolineaceae	g__norank_f__Anaerolineaceae	s__unclassified_g__norank_f__Anaerolineaceae	ASV78806	0	0	0	0	0	0	0	0	0	0	0	0	0	0	0	0	0	0	0	0	0	0	0	0	0	0	0	0	0	0	0	3	0	0	0	0	0	0	0	0	0
d__Bacteria	k__norank_d__Bacteria	p__Proteobacteria	c__Gammaproteobacteria	o__Burkholderiales	f__Burkholderiaceae	g__unclassified_f__Burkholderiaceae	s__unclassified_f__Burkholderiaceae	ASV96082	0	0	0	0	0	0	0	0	0	0	0	0	0	0	0	0	0	0	0	0	0	0	0	0	0	0	0	0	0	0	0	0	0	0	0	0	0	0	0	0	3
d__Bacteria	k__norank_d__Bacteria	p__Firmicutes	c__Bacilli	o__Bacillales	f__Bacillaceae	g__Bacillus	s__Bacillus_sp._BAB-4326	ASV72921	0	0	0	0	0	0	0	0	0	0	0	0	0	0	0	0	0	0	0	0	0	0	0	0	0	4	0	0	0	0	0	0	0	0	0	0	0	0	0	0	0
d__Bacteria	k__norank_d__Bacteria	p__Bacteroidota	c__Bacteroidia	o__unclassified_c__Bacteroidia	f__unclassified_c__Bacteroidia	g__unclassified_c__Bacteroidia	s__unclassified_c__Bacteroidia	ASV11540	0	0	0	0	0	0	0	0	0	0	0	0	4	0	0	0	0	0	0	0	0	0	0	0	0	0	0	0	0	0	0	0	0	0	0	0	0	0	0	0	0
d__Bacteria	k__norank_d__Bacteria	p__Verrucomicrobiota	c__Kiritimatiellae	o__Kiritimatiellales	f__Kiritimatiellaceae	g__R76-B128	s__uncultured_organism_g__R76-B128	ASV98019	0	0	0	0	0	0	0	0	0	0	0	0	0	0	0	0	0	0	0	0	0	0	0	0	2	0	0	0	0	0	0	0	0	0	0	0	0	0	0	0	0
d__Bacteria	k__norank_d__Bacteria	p__unclassified_k__norank_d__Bacteria	c__unclassified_k__norank_d__Bacteria	o__unclassified_k__norank_d__Bacteria	f__unclassified_k__norank_d__Bacteria	g__unclassified_k__norank_d__Bacteria	s__unclassified_k__norank_d__Bacteria	ASV24744	0	0	0	0	0	0	0	0	0	0	0	0	0	0	0	0	0	2	0	0	0	0	0	0	0	0	0	0	0	0	0	0	0	0	0	0	0	0	0	0	0
d__Bacteria	k__norank_d__Bacteria	p__Proteobacteria	c__Gammaproteobacteria	o__unclassified_c__Gammaproteobacteria	f__unclassified_c__Gammaproteobacteria	g__unclassified_c__Gammaproteobacteria	s__unclassified_c__Gammaproteobacteria	ASV80666	0	0	0	0	0	0	0	0	0	0	0	0	0	0	0	0	0	0	0	0	0	0	0	0	0	0	0	0	0	2	0	0	0	0	0	0	0	0	0	0	0
d__Bacteria	k__norank_d__Bacteria	p__Deinococcota	c__Deinococci	o__Deinococcales	f__Trueperaceae	g__Truepera	s__uncultured_bacterium_g__Truepera	ASV45220	7	0	0	4	3	0	0	0	0	0	0	0	0	0	0	0	0	0	0	0	0	0	0	0	0	0	0	0	0	0	0	0	0	0	0	0	0	0	0	0	0
d__Bacteria	k__norank_d__Bacteria	p__Proteobacteria	c__Gammaproteobacteria	o__Alteromonadales	f__Shewanellaceae	g__Shewanella	s__unclassified_g__Shewanella	ASV11554	0	0	0	0	0	0	0	0	0	0	0	0	4	0	0	0	0	0	0	0	0	0	0	0	0	0	0	0	0	0	0	0	0	0	0	0	0	0	0	0	0
d__Bacteria	k__norank_d__Bacteria	p__Proteobacteria	c__Alphaproteobacteria	o__Rhodobacterales	f__Rhodobacteraceae	g__unclassified_f__Rhodobacteraceae	s__unclassified_f__Rhodobacteraceae	ASV87466	0	0	0	0	0	0	0	0	0	0	0	0	0	0	0	0	0	0	0	0	0	0	0	3	0	0	0	0	0	0	0	0	0	0	0	0	0	0	0	0	0
d__Bacteria	k__norank_d__Bacteria	p__Proteobacteria	c__Gammaproteobacteria	o__Gammaproteobacteria_Incertae_Sedis	f__unclassified_o__Gammaproteobacteria_Incertae_Sedis	g__norank_f__unclassified_o__Gammaproteobacteria_Incertae_Sedis	s__unclassified_g__norank_f__unclassified_o__Gammaproteobacteria_Incertae_Sedis	ASV31169	0	0	0	0	0	0	0	0	0	0	0	0	0	0	0	0	0	0	0	0	0	0	0	0	0	0	0	0	0	2	0	0	0	0	0	0	9	0	0	0	0
d__Bacteria	k__norank_d__Bacteria	p__unclassified_k__norank_d__Bacteria	c__unclassified_k__norank_d__Bacteria	o__unclassified_k__norank_d__Bacteria	f__unclassified_k__norank_d__Bacteria	g__unclassified_k__norank_d__Bacteria	s__unclassified_k__norank_d__Bacteria	ASV89348	0	0	0	0	0	0	0	0	0	0	0	0	0	0	0	0	0	0	0	0	0	0	0	0	0	0	0	0	0	0	0	0	0	0	0	0	0	0	0	0	0
d__Bacteria	k__norank_d__Bacteria	p__Firmicutes	c__Clostridia	o__norank_c__Clostridia	f__Hungateiclostridiaceae	g__UCG-012	s__uncultured_prokaryote_g__UCG-012	ASV27512	0	0	0	0	0	0	0	0	0	0	0	0	0	0	0	0	0	0	0	0	0	2	0	0	0	0	0	0	0	0	0	0	0	0	0	0	0	0	0	0	0
d__Bacteria	k__norank_d__Bacteria	p__unclassified_k__norank_d__Bacteria	c__unclassified_k__norank_d__Bacteria	o__unclassified_k__norank_d__Bacteria	f__unclassified_k__norank_d__Bacteria	g__unclassified_k__norank_d__Bacteria	s__unclassified_k__norank_d__Bacteria	ASV52879	2	0	0	0	0	0	0	0	0	0	0	0	0	0	0	0	0	0	0	0	0	0	0	0	0	0	0	0	0	0	0	0	0	0	0	0	0	0	0	0	0
d__Bacteria	k__norank_d__Bacteria	p__Chloroflexi	c__KD4-96	o__norank_c__KD4-96	f__norank_c__KD4-96	g__norank_c__KD4-96	s__uncultured_bacterium_c__KD4-96	ASV300	0	27	23	21	35	26	77	31	64	0	0	0	0	0	0	0	0	39	0	34	27	0	0	0	0	0	0	0	0	14	44	41	52	143	90	121	0	0	0	22	0
d__Bacteria	k__norank_d__Bacteria	p__Bacteroidota	c__Bacteroidia	o__Flavobacteriales	f__Flavobacteriaceae	g__Mangrovimonas	s__Mangrovimonas_sp._ST2L12	ASV61179	0	0	0	0	0	0	0	0	0	0	0	0	0	3	0	0	0	0	0	0	0	0	0	0	0	0	0	0	0	0	0	0	0	0	0	0	0	0	0	0	0
d__Bacteria	k__norank_d__Bacteria	p__unclassified_k__norank_d__Bacteria	c__unclassified_k__norank_d__Bacteria	o__unclassified_k__norank_d__Bacteria	f__unclassified_k__norank_d__Bacteria	g__unclassified_k__norank_d__Bacteria	s__unclassified_k__norank_d__Bacteria	ASV85649	0	0	0	0	0	0	0	0	0	0	0	0	0	0	0	0	0	0	0	0	0	0	0	0	0	0	0	0	0	0	0	0	0	0	0	0	0	0	0	0	0
d__Bacteria	k__norank_d__Bacteria	p__Proteobacteria	c__Gammaproteobacteria	o__unclassified_c__Gammaproteobacteria	f__unclassified_c__Gammaproteobacteria	g__unclassified_c__Gammaproteobacteria	s__unclassified_c__Gammaproteobacteria	ASV30410	0	0	0	0	0	0	0	0	0	0	0	0	0	0	0	0	0	0	0	0	0	0	1	0	0	0	0	0	0	0	0	0	0	0	0	0	0	0	0	0	0
d__Bacteria	k__norank_d__Bacteria	p__Firmicutes	c__Clostridia	o__unclassified_c__Clostridia	f__unclassified_c__Clostridia	g__unclassified_c__Clostridia	s__unclassified_c__Clostridia	ASV75446	0	0	0	0	0	0	0	0	0	0	0	0	0	0	0	0	0	0	0	0	0	0	0	0	0	0	0	0	0	0	0	0	0	0	0	0	0	0	0	2	0
d__Bacteria	k__norank_d__Bacteria	p__Proteobacteria	c__Alphaproteobacteria	o__Rhizobiales	f__unclassified_o__Rhizobiales	g__unclassified_o__Rhizobiales	s__unclassified_o__Rhizobiales	ASV22693	0	0	0	0	0	0	0	0	0	0	0	0	0	0	0	0	0	4	0	0	0	0	0	0	0	0	0	0	0	0	0	0	0	0	0	0	0	0	0	0	0
d__Bacteria	k__norank_d__Bacteria	p__Verrucomicrobiota	c__Omnitrophia	o__Omnitrophales	f__Omnitrophaceae	g__Candidatus_Omnitrophus	s__uncultured_bacterium_g__Candidatus_Omnitrophus	ASV26881	0	0	0	0	0	0	0	0	0	0	0	0	0	0	0	0	0	0	0	0	0	2	0	0	0	0	0	0	0	0	0	0	0	0	0	0	0	0	0	0	0
d__Bacteria	k__norank_d__Bacteria	p__Chloroflexi	c__Anaerolineae	o__SBR1031	f__norank_o__SBR1031	g__norank_o__SBR1031	s__uncultured_organism_o__SBR1031	ASV19646	0	0	0	0	0	0	0	0	0	0	0	0	0	0	0	0	0	0	0	0	0	0	0	0	0	0	0	0	0	0	8	0	4	12	12	5	0	0	0	0	0
d__Bacteria	k__norank_d__Bacteria	p__Chloroflexi	c__Anaerolineae	o__Caldilineales	f__Caldilineaceae	g__norank_f__Caldilineaceae	s__metagenome_f__Caldilineaceae	ASV38221	0	0	0	0	0	0	0	0	0	0	0	0	0	0	0	0	0	0	2	0	0	0	0	0	0	0	0	0	0	0	0	0	0	0	0	0	0	0	0	0	0
d__Bacteria	k__norank_d__Bacteria	p__Campilobacterota	c__Campylobacteria	o__Campylobacterales	f__Sulfurovaceae	g__Sulfurovum	s__unclassified_g__Sulfurovum	ASV84509	0	0	0	0	0	0	0	0	0	0	0	0	0	0	0	0	0	0	0	0	0	0	0	0	0	0	0	0	0	0	2	0	0	0	0	0	0	0	0	0	0
d__Bacteria	k__norank_d__Bacteria	p__unclassified_k__norank_d__Bacteria	c__unclassified_k__norank_d__Bacteria	o__unclassified_k__norank_d__Bacteria	f__unclassified_k__norank_d__Bacteria	g__unclassified_k__norank_d__Bacteria	s__unclassified_k__norank_d__Bacteria	ASV44318	0	0	0	0	0	0	2	0	0	0	0	0	0	0	0	0	0	0	0	0	0	0	0	0	0	0	0	0	0	0	0	0	0	0	0	0	0	0	0	0	0
d__Bacteria	k__norank_d__Bacteria	p__Bacteroidota	c__Bacteroidia	o__Chitinophagales	f__Chitinophagaceae	g__Aurantisolimonas	s__unclassified_g__Aurantisolimonas	ASV51958	4	0	0	0	0	0	0	0	0	0	0	0	0	0	0	0	0	0	0	0	0	0	0	0	0	0	0	0	0	0	0	0	0	0	0	0	0	0	0	0	0
d__Bacteria	k__norank_d__Bacteria	p__Chloroflexi	c__Anaerolineae	o__SBR1031	f__A4b	g__norank_f__A4b	s__unclassified_g__norank_f__A4b	ASV16571	0	0	0	0	0	0	0	0	0	0	0	0	0	0	0	0	0	0	0	0	0	0	0	0	0	0	10	0	0	2	0	0	0	0	0	0	13	0	31	0	0
d__Bacteria	k__norank_d__Bacteria	p__Myxococcota	c__Polyangia	o__unclassified_c__Polyangia	f__unclassified_c__Polyangia	g__unclassified_c__Polyangia	s__unclassified_c__Polyangia	ASV44200	0	0	0	0	0	0	3	0	0	0	0	0	0	0	0	0	0	0	0	0	0	0	0	0	0	0	0	0	0	0	0	0	0	0	0	0	0	0	0	0	0
d__Bacteria	k__norank_d__Bacteria	p__Chloroflexi	c__KD4-96	o__norank_c__KD4-96	f__norank_c__KD4-96	g__norank_c__KD4-96	s__unclassified_g__norank_c__KD4-96	ASV9563	0	0	0	0	0	0	0	0	0	0	0	0	0	0	0	0	0	0	0	0	0	0	0	0	0	0	0	0	2	0	0	0	0	0	0	0	0	0	0	0	0
d__Bacteria	k__norank_d__Bacteria	p__Bacteroidota	c__Bacteroidia	o__Cytophagales	f__unclassified_o__Cytophagales	g__unclassified_o__Cytophagales	s__unclassified_o__Cytophagales	ASV100642	0	0	0	0	0	0	0	0	0	0	0	0	0	0	0	0	2	0	0	0	0	0	0	0	0	0	0	0	0	0	0	0	0	0	0	0	0	0	0	0	0
d__Bacteria	k__norank_d__Bacteria	p__unclassified_k__norank_d__Bacteria	c__unclassified_k__norank_d__Bacteria	o__unclassified_k__norank_d__Bacteria	f__unclassified_k__norank_d__Bacteria	g__unclassified_k__norank_d__Bacteria	s__unclassified_k__norank_d__Bacteria	ASV46726	0	0	0	2	0	0	0	0	0	0	0	0	0	0	0	0	0	0	0	0	0	0	0	0	0	0	0	0	0	0	0	0	0	0	0	0	0	0	0	0	0
d__Bacteria	k__norank_d__Bacteria	p__Actinobacteriota	c__Acidimicrobiia	o__Actinomarinales	f__norank_o__Actinomarinales	g__norank_o__Actinomarinales	s__unclassified_g__norank_o__Actinomarinales	ASV31737	0	0	0	0	0	0	0	0	0	0	0	0	0	0	0	0	0	0	0	0	0	0	0	0	5	0	0	4	0	0	0	0	0	0	0	0	3	0	4	0	0
d__Bacteria	k__norank_d__Bacteria	p__Chloroflexi	c__Anaerolineae	o__SBR1031	f__norank_o__SBR1031	g__norank_o__SBR1031	s__unclassified_g__norank_o__SBR1031	ASV82731	0	0	0	0	0	0	0	0	0	0	0	0	0	0	0	0	0	0	0	0	0	0	0	0	0	0	0	0	0	0	0	0	0	0	0	0	0	0	2	0	0
d__Bacteria	k__norank_d__Bacteria	p__Desulfobacterota	c__Desulfobaccia	o__Desulfobaccales	f__Desulfobaccaceae	g__Desulfobacca	s__uncultured_bacterium_g__Desulfobacca	ASV71988	0	0	0	0	0	0	0	0	0	0	2	3	0	0	0	0	0	0	0	0	0	0	0	0	0	0	0	0	0	0	0	0	0	0	0	0	0	0	0	0	0
d__Bacteria	k__norank_d__Bacteria	p__Firmicutes	c__Bacilli	o__RsaHf231	f__norank_o__RsaHf231	g__norank_o__RsaHf231	s__uncultured_bacterium_o__RsaHf231	ASV18654	0	0	0	0	0	0	0	0	0	0	0	0	0	0	0	0	0	0	0	0	0	0	0	0	0	0	2	0	0	2	0	0	0	0	0	0	0	0	0	0	0
d__Bacteria	k__norank_d__Bacteria	p__Acidobacteriota	c__unclassified_p__Acidobacteriota	o__unclassified_p__Acidobacteriota	f__unclassified_p__Acidobacteriota	g__unclassified_p__Acidobacteriota	s__unclassified_p__Acidobacteriota	ASV10243	0	0	0	0	0	0	0	0	0	0	0	0	0	0	0	0	0	0	0	0	0	0	0	0	0	0	0	0	2	0	0	0	0	0	0	0	0	0	0	0	0
d__Bacteria	k__norank_d__Bacteria	p__Proteobacteria	c__Alphaproteobacteria	o__Rhodobacterales	f__Rhodobacteraceae	g__unclassified_f__Rhodobacteraceae	s__unclassified_f__Rhodobacteraceae	ASV83382	0	0	0	0	0	0	0	0	0	0	0	0	0	0	0	0	0	0	0	0	0	0	0	0	0	0	0	0	0	0	4	0	0	0	0	0	0	0	0	0	0
d__Bacteria	k__norank_d__Bacteria	p__Gemmatimonadota	c__BD2-11_terrestrial_group	o__norank_c__BD2-11_terrestrial_group	f__norank_c__BD2-11_terrestrial_group	g__norank_c__BD2-11_terrestrial_group	s__uncultured_bacterium_c__BD2-11_terrestrial_group	ASV82765	0	0	0	0	0	0	0	0	0	0	0	0	0	0	0	0	0	0	0	0	0	0	0	0	0	0	0	0	0	0	0	0	0	0	0	0	0	0	1	0	0
d__Bacteria	k__norank_d__Bacteria	p__Actinobacteriota	c__Actinobacteria	o__Streptosporangiales	f__Thermomonosporaceae	g__Actinoallomurus	s__unclassified_g__Actinoallomurus	ASV77640	0	0	0	0	0	0	0	0	0	0	0	0	0	0	0	0	0	0	0	0	0	0	0	0	0	0	0	0	0	0	0	0	0	0	0	0	0	0	0	0	0
d__Bacteria	k__norank_d__Bacteria	p__Firmicutes	c__Clostridia	o__norank_c__Clostridia	f__Hungateiclostridiaceae	g__unclassified_f__Hungateiclostridiaceae	s__unclassified_f__Hungateiclostridiaceae	ASV95807	0	0	0	0	0	0	0	0	0	0	0	0	0	0	0	0	0	0	0	0	0	0	0	0	0	0	0	0	0	0	0	0	0	0	0	0	0	0	0	0	7
d__Bacteria	k__norank_d__Bacteria	p__Proteobacteria	c__Gammaproteobacteria	o__Burkholderiales	f__Comamonadaceae	g__Aquabacterium	s__unclassified_g__Aquabacterium	ASV97120	0	0	0	0	0	0	0	0	0	0	0	0	0	0	0	0	0	0	0	0	0	0	0	0	0	0	0	0	0	0	0	0	0	0	0	0	0	0	0	0	2
d__Bacteria	k__norank_d__Bacteria	p__Planctomycetota	c__Phycisphaerae	o__Phycisphaerales	f__Phycisphaeraceae	g__Urania-1B-19_marine_sediment_group	s__uncultured_bacterium_g__Urania-1B-19_marine_sediment_group	ASV36057	0	0	0	0	0	0	0	0	0	0	0	0	0	0	0	0	0	0	0	0	0	0	0	0	0	0	0	7	0	0	0	0	0	0	0	0	0	0	0	0	0
d__Bacteria	k__norank_d__Bacteria	p__Bacteroidota	c__Bacteroidia	o__Cytophagales	f__Cyclobacteriaceae	g__norank_f__Cyclobacteriaceae	s__unclassified_g__norank_f__Cyclobacteriaceae	ASV3879	0	0	0	0	0	0	0	0	0	0	0	0	0	0	8	0	0	0	13	0	21	0	0	0	0	0	0	0	0	0	0	0	0	0	0	0	0	0	0	0	0
d__Bacteria	k__norank_d__Bacteria	p__Patescibacteria	c__Saccharimonadia	o__Saccharimonadales	f__LWQ8	g__norank_f__LWQ8	s__uncultured_bacterium_f__LWQ8	ASV17818	0	0	0	0	0	0	0	0	0	0	0	0	0	0	0	0	0	0	0	0	0	0	0	0	0	0	4	0	0	0	0	0	0	0	0	0	0	0	0	0	0
d__Bacteria	k__norank_d__Bacteria	p__Desulfobacterota	c__Desulfobacteria	o__Desulfobacterales	f__Desulfosarcinaceae	g__Desulfosarcina	s__unclassified_g__Desulfosarcina	ASV78232	0	0	0	0	0	0	0	0	0	0	0	0	0	0	0	0	0	0	0	0	0	0	0	0	0	0	0	0	0	0	0	5	0	0	0	0	0	0	0	0	0
d__Bacteria	k__norank_d__Bacteria	p__Acidobacteriota	c__Vicinamibacteria	o__Subgroup_17	f__norank_o__Subgroup_17	g__norank_o__Subgroup_17	s__unclassified_g__norank_o__Subgroup_17	ASV39539	0	0	0	0	0	0	0	0	0	0	0	0	0	0	0	0	0	0	1	0	0	0	0	0	0	0	0	0	0	0	0	0	0	0	0	0	0	0	0	0	0
d__Bacteria	k__norank_d__Bacteria	p__Patescibacteria	c__Gracilibacteria	o__Candidatus_Abawacabacteria	f__norank_o__Candidatus_Abawacabacteria	g__norank_o__Candidatus_Abawacabacteria	s__uncultured_bacterium_o__Candidatus_Abawacabacteria	ASV31491	0	0	0	0	0	0	0	0	0	0	0	0	0	0	0	0	0	0	0	0	0	0	0	0	0	0	0	0	0	0	0	0	0	0	0	0	3	0	0	0	0
d__Bacteria	k__norank_d__Bacteria	p__unclassified_k__norank_d__Bacteria	c__unclassified_k__norank_d__Bacteria	o__unclassified_k__norank_d__Bacteria	f__unclassified_k__norank_d__Bacteria	g__unclassified_k__norank_d__Bacteria	s__unclassified_k__norank_d__Bacteria	ASV85061	0	0	0	0	0	0	0	0	0	0	0	0	0	0	0	0	0	0	0	0	0	0	0	0	0	0	0	0	0	0	0	0	0	0	0	0	0	0	0	0	0
d__Bacteria	k__norank_d__Bacteria	p__Actinobacteriota	c__Actinobacteria	o__Propionibacteriales	f__Nocardioidaceae	g__Actinopolymorpha	s__unclassified_g__Actinopolymorpha	ASV54208	0	0	0	0	0	0	0	0	0	0	0	0	0	0	0	0	0	0	0	0	0	0	0	0	0	0	0	0	0	0	0	0	0	0	0	0	0	0	0	0	0
d__Bacteria	k__norank_d__Bacteria	p__unclassified_k__norank_d__Bacteria	c__unclassified_k__norank_d__Bacteria	o__unclassified_k__norank_d__Bacteria	f__unclassified_k__norank_d__Bacteria	g__unclassified_k__norank_d__Bacteria	s__unclassified_k__norank_d__Bacteria	ASV58167	0	0	0	0	0	0	0	0	0	0	0	0	0	0	0	0	0	0	0	0	0	0	0	0	0	0	0	0	0	0	0	0	3	0	0	0	0	0	0	0	0
d__Bacteria	k__norank_d__Bacteria	p__Myxococcota	c__Polyangia	o__Polyangiales	f__Sandaracinaceae	g__norank_f__Sandaracinaceae	s__metagenome_f__Sandaracinaceae	ASV96283	0	0	0	0	0	0	0	0	0	0	0	0	0	0	0	0	0	0	0	0	0	0	0	0	0	0	0	0	0	0	0	0	0	0	0	0	0	0	0	0	1
d__Bacteria	k__norank_d__Bacteria	p__Firmicutes	c__Bacilli	o__Exiguobacterales	f__Exiguobacteraceae	g__Exiguobacterium	s__unclassified_g__Exiguobacterium	ASV77059	0	0	0	0	0	0	0	0	0	0	0	0	0	0	0	0	0	0	0	0	0	0	0	0	0	0	0	0	0	0	0	0	0	0	0	0	0	0	0	0	0
d__Bacteria	k__norank_d__Bacteria	p__Actinobacteriota	c__Actinobacteria	o__Actinomycetales	f__Actinomycetaceae	g__Actinomyces	s__unclassified_g__Actinomyces	ASV1295	0	0	0	0	0	0	0	0	0	0	0	0	0	0	0	0	0	0	0	0	0	0	0	0	0	0	0	0	0	0	0	0	0	0	0	0	0	0	0	5	0
d__Bacteria	k__norank_d__Bacteria	p__SAR324_cladeMarine_group_B	c__norank_p__SAR324_cladeMarine_group_B	o__norank_p__SAR324_cladeMarine_group_B	f__norank_p__SAR324_cladeMarine_group_B	g__norank_p__SAR324_cladeMarine_group_B	s__uncultured_organism_p__SAR324_cladeMarine_group_B	ASV9331	0	0	0	0	0	0	0	0	0	0	0	0	0	0	0	0	0	0	0	0	0	0	0	0	0	0	0	0	1	0	0	0	0	0	0	0	0	0	0	0	0
d__Bacteria	k__norank_d__Bacteria	p__Myxococcota	c__Polyangia	o__MidBa8	f__norank_o__MidBa8	g__norank_o__MidBa8	s__unclassified_g__norank_o__MidBa8	ASV5087	0	0	0	0	0	0	0	0	0	0	0	0	0	0	2	0	0	0	0	0	0	0	0	0	0	0	0	0	0	0	0	0	0	0	0	0	0	0	0	0	0
d__Bacteria	k__norank_d__Bacteria	p__Proteobacteria	c__Gammaproteobacteria	o__unclassified_c__Gammaproteobacteria	f__unclassified_c__Gammaproteobacteria	g__unclassified_c__Gammaproteobacteria	s__unclassified_c__Gammaproteobacteria	ASV80764	0	0	0	0	0	0	0	0	0	0	0	0	0	0	0	0	0	0	0	0	0	0	0	0	0	0	0	0	0	3	0	0	0	0	0	0	0	0	0	0	0
d__Bacteria	k__norank_d__Bacteria	p__Sumerlaeota	c__Sumerlaeia	o__norank_c__Sumerlaeia	f__norank_c__Sumerlaeia	g__norank_c__Sumerlaeia	s__uncultured_bacterium_c__Sumerlaeia	ASV80817	0	0	0	0	0	0	0	0	0	0	0	0	0	0	0	0	0	0	0	0	0	0	0	0	0	0	0	0	0	2	0	0	0	0	0	0	0	0	0	0	0
d__Bacteria	k__norank_d__Bacteria	p__Proteobacteria	c__Gammaproteobacteria	o__Burkholderiales	f__TRA3-20	g__norank_f__TRA3-20	s__unclassified_g__norank_f__TRA3-20	ASV22766	0	0	0	0	0	0	0	0	0	0	0	0	0	0	0	0	0	3	0	0	0	0	0	0	0	0	0	0	0	0	0	0	0	0	0	0	0	0	0	0	0
d__Bacteria	k__norank_d__Bacteria	p__Chloroflexi	c__Anaerolineae	o__Ardenticatenales	f__norank_o__Ardenticatenales	g__norank_o__Ardenticatenales	s__uncultured_bacterium_o__Ardenticatenales	ASV44723	0	0	0	0	0	0	2	0	0	0	0	0	0	0	0	0	0	0	0	0	0	0	0	0	0	0	0	0	0	0	0	0	0	0	0	0	0	0	0	0	0
d__Bacteria	k__norank_d__Bacteria	p__Actinobacteriota	c__Acidimicrobiia	o__Microtrichales	f__Ilumatobacteraceae	g__Ilumatobacter	s__unclassified_g__Ilumatobacter	ASV16015	0	0	0	0	0	0	0	0	0	0	0	0	0	0	0	0	0	0	0	0	0	0	0	0	0	0	29	0	0	0	0	0	0	0	15	0	0	0	0	0	0
d__Bacteria	k__norank_d__Bacteria	p__Proteobacteria	c__Alphaproteobacteria	o__unclassified_c__Alphaproteobacteria	f__unclassified_c__Alphaproteobacteria	g__unclassified_c__Alphaproteobacteria	s__unclassified_c__Alphaproteobacteria	ASV44248	0	0	0	0	0	0	3	0	0	0	0	0	0	0	0	0	0	0	0	0	0	0	0	0	0	0	0	0	0	0	0	0	0	0	0	0	0	0	0	0	0
d__Bacteria	k__norank_d__Bacteria	p__Proteobacteria	c__Gammaproteobacteria	o__Legionellales	f__Legionellaceae	g__norank_f__Legionellaceae	s__unclassified_g__norank_f__Legionellaceae	ASV72977	0	0	0	0	0	0	0	0	0	0	0	0	0	0	0	0	0	0	0	0	0	0	0	0	0	3	0	0	0	0	0	0	0	0	0	0	0	0	0	0	0
d__Bacteria	k__norank_d__Bacteria	p__Acidobacteriota	c__Thermoanaerobaculia	o__Thermoanaerobaculales	f__Thermoanaerobaculaceae	g__Subgroup_23	s__unclassified_g__Subgroup_23	ASV83465	0	0	0	0	0	0	0	0	0	0	0	0	0	0	0	0	0	0	0	0	0	0	0	0	0	0	0	0	0	0	3	0	0	0	0	0	0	0	0	0	0
d__Bacteria	k__norank_d__Bacteria	p__unclassified_k__norank_d__Bacteria	c__unclassified_k__norank_d__Bacteria	o__unclassified_k__norank_d__Bacteria	f__unclassified_k__norank_d__Bacteria	g__unclassified_k__norank_d__Bacteria	s__unclassified_k__norank_d__Bacteria	ASV58886	0	0	0	0	0	0	0	0	0	0	0	0	0	0	0	0	0	0	0	0	0	0	0	0	0	0	0	0	0	0	0	0	2	0	0	0	0	0	0	0	0
d__Bacteria	k__norank_d__Bacteria	p__Verrucomicrobiota	c__Chlamydiae	o__Chlamydiales	f__Parachlamydiaceae	g__Neochlamydia	s__unclassified_g__Neochlamydia	ASV100275	0	0	0	0	0	0	0	0	0	0	0	0	0	0	0	0	2	0	0	0	0	0	0	0	0	0	0	0	0	0	0	0	0	0	0	0	0	0	0	0	0
d__Bacteria	k__norank_d__Bacteria	p__Bacteroidota	c__Rhodothermia	o__Rhodothermales	f__Rhodothermaceae	g__norank_f__Rhodothermaceae	s__unclassified_g__norank_f__Rhodothermaceae	ASV69786	0	0	0	0	0	0	0	0	0	0	0	0	0	0	0	2	0	0	0	0	0	0	0	0	0	0	0	0	0	0	0	0	0	0	0	0	0	0	0	0	0
d__Bacteria	k__norank_d__Bacteria	p__Desulfobacterota	c__Desulfobacteria	o__Desulfobacterales	f__Desulfosarcinaceae	g__norank_f__Desulfosarcinaceae	s__unclassified_g__norank_f__Desulfosarcinaceae	ASV12522	0	0	0	0	0	0	0	0	0	0	0	0	3	0	0	0	0	0	0	0	0	0	0	0	0	0	0	0	0	0	0	0	0	0	0	0	0	0	0	0	0
d__Bacteria	k__norank_d__Bacteria	p__Firmicutes	c__Clostridia	o__unclassified_c__Clostridia	f__unclassified_c__Clostridia	g__unclassified_c__Clostridia	s__unclassified_c__Clostridia	ASV35104	0	0	0	0	0	0	0	0	0	0	0	0	0	0	0	0	0	0	0	0	0	0	0	0	0	0	0	0	0	0	0	0	0	0	0	0	0	0	0	0	0
d__Bacteria	k__norank_d__Bacteria	p__Firmicutes	c__Clostridia	o__norank_c__Clostridia	f__Hungateiclostridiaceae	g__unclassified_f__Hungateiclostridiaceae	s__unclassified_f__Hungateiclostridiaceae	ASV32150	0	0	0	0	0	0	0	0	0	0	0	0	0	0	0	0	0	0	0	0	0	0	0	0	0	0	0	0	0	0	0	0	0	0	0	0	2	0	0	0	0
d__Bacteria	k__norank_d__Bacteria	p__Bacteroidota	c__Bacteroidia	o__Chitinophagales	f__Saprospiraceae	g__unclassified_f__Saprospiraceae	s__unclassified_f__Saprospiraceae	ASV80748	0	0	0	0	0	0	0	0	0	0	0	0	0	0	0	0	0	0	0	0	0	0	0	0	0	0	0	0	0	2	0	0	0	0	0	0	0	0	0	0	0
d__Bacteria	k__norank_d__Bacteria	p__Actinobacteriota	c__Acidimicrobiia	o__unclassified_c__Acidimicrobiia	f__unclassified_c__Acidimicrobiia	g__unclassified_c__Acidimicrobiia	s__unclassified_c__Acidimicrobiia	ASV1889	0	0	0	0	0	0	0	0	0	0	0	0	0	0	0	0	0	0	0	0	0	0	0	0	0	0	0	0	0	0	0	0	0	0	0	0	0	0	0	0	0
d__Bacteria	k__norank_d__Bacteria	p__Firmicutes	c__Clostridia	o__Clostridiales	f__Caloramatoraceae	g__Fervidicella	s__uncultured_bacterium_g__Fervidicella	ASV34186	0	0	0	0	0	0	0	0	0	0	0	0	0	0	0	0	0	0	0	0	0	0	0	0	0	0	0	0	0	0	0	0	0	0	0	0	0	0	0	0	0
d__Bacteria	k__norank_d__Bacteria	p__Proteobacteria	c__Alphaproteobacteria	o__Rhodobacterales	f__Rhodobacteraceae	g__unclassified_f__Rhodobacteraceae	s__unclassified_f__Rhodobacteraceae	ASV20961	0	0	0	0	0	0	0	0	0	0	0	0	0	0	0	0	0	0	0	0	0	0	0	0	0	0	0	0	0	0	0	0	0	0	1	0	0	0	0	0	0
d__Bacteria	k__norank_d__Bacteria	p__Planctomycetota	c__Planctomycetes	o__Gemmatales	f__Gemmataceae	g__norank_f__Gemmataceae	s__unclassified_g__norank_f__Gemmataceae	ASV72386	0	0	0	0	0	0	0	0	0	0	0	0	0	0	0	0	0	0	0	0	0	0	0	0	0	15	0	0	0	0	0	0	0	0	0	0	0	0	0	0	0
d__Bacteria	k__norank_d__Bacteria	p__Myxococcota	c__Polyangia	o__Haliangiales	f__Haliangiaceae	g__Haliangium	s__unclassified_g__Haliangium	ASV49251	0	0	0	0	0	0	0	0	0	6	0	0	0	0	0	0	0	0	0	0	0	0	0	0	0	0	0	0	0	0	0	0	0	0	0	0	0	0	0	0	0
d__Bacteria	k__norank_d__Bacteria	p__Myxococcota	c__Polyangia	o__Polyangiales	f__Sandaracinaceae	g__norank_f__Sandaracinaceae	s__uncultured_bacterium_f__Sandaracinaceae	ASV19181	0	0	0	0	0	0	0	0	0	0	0	0	0	0	0	0	0	0	0	0	0	0	0	0	0	0	1	0	0	0	0	0	0	0	0	0	0	0	0	0	0
d__Bacteria	k__norank_d__Bacteria	p__Firmicutes	c__Clostridia	o__Peptostreptococcales-Tissierellales	f__Caminicellaceae	g__Paramaledivibacter	s__unclassified_g__Paramaledivibacter	ASV33584	0	0	0	0	0	0	0	0	0	0	0	0	0	0	0	0	0	0	0	0	0	0	0	0	0	0	0	0	0	0	0	0	0	0	0	0	0	0	0	0	0
d__Bacteria	k__norank_d__Bacteria	p__Bacteroidota	c__Bacteroidia	o__unclassified_c__Bacteroidia	f__unclassified_c__Bacteroidia	g__unclassified_c__Bacteroidia	s__unclassified_c__Bacteroidia	ASV64585	0	0	0	0	0	0	0	0	0	0	0	0	0	0	0	0	0	0	0	0	0	0	0	0	0	0	0	0	0	0	0	0	0	0	0	0	0	0	0	0	0
d__Bacteria	k__norank_d__Bacteria	p__Campilobacterota	c__Campylobacteria	o__Campylobacterales	f__Sulfurovaceae	g__Sulfurovum	s__unclassified_g__Sulfurovum	ASV54271	0	0	0	0	0	0	0	0	0	0	0	0	0	0	0	0	0	0	0	0	0	0	0	0	0	0	0	0	0	0	0	0	0	0	0	0	0	0	0	0	0
d__Bacteria	k__norank_d__Bacteria	p__Myxococcota	c__Myxococcia	o__Myxococcales	f__Myxococcaceae	g__P3OB-42	s__unclassified_g__P3OB-42	ASV40853	0	0	0	0	0	0	0	0	0	0	0	0	0	0	0	0	0	0	0	0	0	0	0	0	0	0	0	0	0	0	0	0	0	0	0	0	0	1	0	0	0
d__Bacteria	k__norank_d__Bacteria	p__Gemmatimonadota	c__Gemmatimonadetes	o__Gemmatimonadales	f__Gemmatimonadaceae	g__norank_f__Gemmatimonadaceae	s__uncultured_bacterium_f__Gemmatimonadaceae	ASV48398	0	0	0	0	0	0	0	0	1	0	0	0	0	0	0	0	0	0	0	0	0	0	0	0	0	0	0	0	0	0	0	0	0	0	0	0	0	0	0	0	0
d__Bacteria	k__norank_d__Bacteria	p__Proteobacteria	c__Alphaproteobacteria	o__Rhizobiales	f__Devosiaceae	g__Devosia	s__unclassified_g__Devosia	ASV54775	0	0	0	0	0	0	0	0	0	0	0	0	0	0	0	0	0	0	0	0	0	0	0	0	0	0	0	0	0	0	0	0	0	0	0	0	0	0	0	0	0
d__Bacteria	k__norank_d__Bacteria	p__Desulfobacterota	c__Desulfobulbia	o__Desulfobulbales	f__Desulfocapsaceae	g__unclassified_f__Desulfocapsaceae	s__unclassified_f__Desulfocapsaceae	ASV87544	0	0	0	0	0	0	0	0	0	0	0	0	0	0	0	0	0	0	0	0	0	0	0	3	0	0	0	0	0	0	0	0	0	0	0	0	0	0	0	0	0
d__Bacteria	k__norank_d__Bacteria	p__Proteobacteria	c__Alphaproteobacteria	o__Sphingomonadales	f__Sphingomonadaceae	g__Erythrobacter	s__unclassified_g__Erythrobacter	ASV83114	0	0	0	0	0	0	0	0	0	0	0	0	0	0	0	0	0	0	0	0	0	0	0	0	0	0	0	0	0	0	5	0	0	0	0	0	0	0	0	0	0
d__Bacteria	k__norank_d__Bacteria	p__unclassified_k__norank_d__Bacteria	c__unclassified_k__norank_d__Bacteria	o__unclassified_k__norank_d__Bacteria	f__unclassified_k__norank_d__Bacteria	g__unclassified_k__norank_d__Bacteria	s__unclassified_k__norank_d__Bacteria	ASV68823	0	0	0	0	0	0	0	0	0	0	0	0	0	0	0	2	0	0	0	0	0	0	0	0	0	0	0	0	0	0	0	0	0	0	0	0	0	0	0	0	0
d__Bacteria	k__norank_d__Bacteria	p__Chloroflexi	c__Anaerolineae	o__Anaerolineales	f__Anaerolineaceae	g__norank_f__Anaerolineaceae	s__unclassified_g__norank_f__Anaerolineaceae	ASV10711	0	0	0	0	4	0	0	0	0	10	16	36	15	9	0	0	0	0	0	0	0	0	0	0	0	0	0	0	0	0	0	0	0	0	0	0	0	0	0	0	0
d__Bacteria	k__norank_d__Bacteria	p__Myxococcota	c__Polyangia	o__Haliangiales	f__Haliangiaceae	g__Haliangium	s__unclassified_g__Haliangium	ASV15392	0	0	0	0	0	0	0	4	0	0	0	0	0	0	0	0	0	0	0	0	0	0	0	0	0	0	0	0	0	0	0	0	0	0	0	0	0	0	0	0	0
d__Bacteria	k__norank_d__Bacteria	p__Chloroflexi	c__Anaerolineae	o__SBR1031	f__norank_o__SBR1031	g__norank_o__SBR1031	s__uncultured_Chlorobi_bacterium_o__SBR1031	ASV75128	0	0	0	0	0	0	0	0	0	0	0	0	0	0	0	0	0	0	0	0	0	0	0	0	0	0	0	0	0	0	0	0	0	0	0	0	0	0	0	10	0
d__Bacteria	k__norank_d__Bacteria	p__Verrucomicrobiota	c__Chlamydiae	o__Chlamydiales	f__Waddliaceae	g__Waddlia	s__uncultured_bacterium_g__Waddlia	ASV76081	0	0	0	0	0	0	0	0	0	0	0	0	0	0	0	0	0	0	0	0	0	0	0	0	0	0	0	0	0	4	0	1	0	0	0	0	0	0	0	1	0
d__Bacteria	k__norank_d__Bacteria	p__Proteobacteria	c__Alphaproteobacteria	o__Sphingomonadales	f__Sphingomonadaceae	g__Erythrobacter	s__Erythrobacter_sp._K10-17	ASV8250	0	0	0	0	0	0	0	0	0	0	0	0	0	0	0	0	0	0	0	0	0	0	0	0	10	0	0	0	8	0	0	0	0	0	0	0	0	0	0	0	0
d__Bacteria	k__norank_d__Bacteria	p__Proteobacteria	c__Gammaproteobacteria	o__Vibrionales	f__Vibrionaceae	g__Vibrio	s__unclassified_g__Vibrio	ASV2345	0	0	0	0	0	0	0	0	0	0	0	0	0	0	0	0	0	0	0	0	0	0	0	0	0	0	0	0	0	0	0	0	0	0	0	0	0	0	0	0	0
d__Bacteria	k__norank_d__Bacteria	p__Deinococcota	c__Deinococci	o__Deinococcales	f__Trueperaceae	g__Truepera	s__uncultured_Deinococcales_bacterium	ASV40122	0	0	0	0	0	0	0	0	0	0	0	0	0	0	0	0	0	0	0	0	0	0	0	0	0	0	0	0	0	0	0	0	0	0	0	0	0	2	0	0	0
d__Bacteria	k__norank_d__Bacteria	p__Acidobacteriota	c__Acidobacteriae	o__Bryobacterales	f__Bryobacteraceae	g__Bryobacter	s__unclassified_g__Bryobacter	ASV20134	0	0	0	0	0	0	0	0	0	0	0	0	0	0	0	0	0	0	0	0	0	0	0	0	0	0	0	0	0	0	0	0	0	0	3	0	0	0	0	0	0
d__Bacteria	k__norank_d__Bacteria	p__Chloroflexi	c__JG30-KF-CM66	o__norank_c__JG30-KF-CM66	f__norank_c__JG30-KF-CM66	g__norank_c__JG30-KF-CM66	s__unclassified_g__norank_c__JG30-KF-CM66	ASV9554	0	0	0	0	0	0	0	0	0	0	2	0	0	0	0	0	0	0	0	0	0	0	0	0	0	0	0	0	2	0	0	0	0	0	0	0	0	0	0	0	0
d__Bacteria	k__norank_d__Bacteria	p__Acidobacteriota	c__Subgroup_21	o__norank_c__Subgroup_21	f__norank_c__Subgroup_21	g__norank_c__Subgroup_21	s__uncultured_bacterium_c__Subgroup_21	ASV4294	0	0	0	0	0	0	0	0	0	0	0	0	0	0	4	0	0	0	0	0	0	0	0	0	0	0	0	0	0	0	0	0	0	0	0	0	0	0	0	0	0
d__Bacteria	k__norank_d__Bacteria	p__Planctomycetota	c__Phycisphaerae	o__Phycisphaerales	f__Phycisphaeraceae	g__norank_f__Phycisphaeraceae	s__uncultured_bacterium_f__Phycisphaeraceae	ASV93165	0	0	0	0	0	0	0	0	0	0	0	3	0	0	0	0	0	0	0	0	0	0	0	0	0	0	0	0	0	0	0	0	0	0	0	0	0	0	0	0	0
d__Bacteria	k__norank_d__Bacteria	p__Proteobacteria	c__Gammaproteobacteria	o__Cellvibrionales	f__Cellvibrionaceae	g__Cellvibrio	s__unclassified_g__Cellvibrio	ASV7045	0	0	0	0	0	0	0	0	0	0	0	0	0	0	2	0	0	0	0	0	0	0	0	0	0	0	0	0	0	0	0	0	0	0	0	0	0	0	0	0	0
d__Bacteria	k__norank_d__Bacteria	p__Bacteroidota	c__Bacteroidia	o__unclassified_c__Bacteroidia	f__unclassified_c__Bacteroidia	g__unclassified_c__Bacteroidia	s__unclassified_c__Bacteroidia	ASV85226	0	0	0	0	0	0	0	0	0	0	0	0	0	0	0	0	0	0	0	0	0	0	0	0	0	0	0	0	0	0	0	0	0	0	0	0	0	0	0	0	0
d__Bacteria	k__norank_d__Bacteria	p__Sumerlaeota	c__Sumerlaeia	o__norank_c__Sumerlaeia	f__norank_c__Sumerlaeia	g__norank_c__Sumerlaeia	s__uncultured_organism_c__Sumerlaeia	ASV63316	0	0	0	0	0	0	0	0	0	0	0	0	0	0	0	0	0	0	0	0	0	0	0	0	0	0	0	0	0	0	0	0	0	0	0	1	0	0	0	0	0
d__Bacteria	k__norank_d__Bacteria	p__Cyanobacteria	c__Cyanobacteriia	o__Cyanobacteriales	f__Xenococcaceae	g__Xenococcus_CRM	s__unclassified_g__Xenococcus_CRM	ASV7271	0	0	0	0	0	0	0	0	0	0	0	0	0	0	0	0	0	0	0	0	0	0	0	0	0	3	2	933	172	148	0	0	0	0	0	0	0	0	1	0	0
d__Bacteria	k__norank_d__Bacteria	p__Spirochaetota	c__Spirochaetia	o__Spirochaetales	f__Spirochaetaceae	g__Sediminispirochaeta	s__uncultured_organism_g__Sediminispirochaeta	ASV32328	0	0	0	0	0	0	0	0	0	0	0	0	0	0	0	0	0	0	0	0	0	0	0	0	0	0	0	0	0	0	0	0	0	0	0	0	1	0	0	0	0
d__Bacteria	k__norank_d__Bacteria	p__unclassified_k__norank_d__Bacteria	c__unclassified_k__norank_d__Bacteria	o__unclassified_k__norank_d__Bacteria	f__unclassified_k__norank_d__Bacteria	g__unclassified_k__norank_d__Bacteria	s__unclassified_k__norank_d__Bacteria	ASV84296	0	0	0	0	0	0	0	0	0	0	0	0	0	0	0	0	0	0	0	0	0	0	0	0	0	0	0	0	0	0	1	0	0	0	0	0	0	0	0	0	0
d__Bacteria	k__norank_d__Bacteria	p__Proteobacteria	c__Alphaproteobacteria	o__Caulobacterales	f__Parvularculaceae	g__unclassified_f__Parvularculaceae	s__unclassified_f__Parvularculaceae	ASV8798	0	0	0	0	0	0	0	0	0	0	0	0	0	0	0	0	0	0	0	0	0	0	0	0	0	0	0	17	3	6	0	0	0	0	0	0	0	3	0	0	0
d__Bacteria	k__norank_d__Bacteria	p__Acidobacteriota	c__Vicinamibacteria	o__Subgroup_17	f__norank_o__Subgroup_17	g__norank_o__Subgroup_17	s__metagenome_o__Subgroup_17	ASV15511	0	0	0	0	0	0	0	3	0	0	0	0	0	0	0	0	0	0	0	0	0	0	0	0	0	0	0	0	0	0	0	0	0	0	0	0	0	0	0	0	0
d__Bacteria	k__norank_d__Bacteria	p__Proteobacteria	c__Gammaproteobacteria	o__unclassified_c__Gammaproteobacteria	f__unclassified_c__Gammaproteobacteria	g__unclassified_c__Gammaproteobacteria	s__unclassified_c__Gammaproteobacteria	ASV101575	0	0	0	0	0	0	0	0	0	0	0	0	0	0	0	0	2	0	0	0	0	0	0	0	0	0	0	0	0	0	0	0	0	0	0	0	0	0	0	0	0
d__Bacteria	k__norank_d__Bacteria	p__Chloroflexi	c__Anaerolineae	o__SBR1031	f__norank_o__SBR1031	g__norank_o__SBR1031	s__unclassified_g__norank_o__SBR1031	ASV28946	0	0	0	0	0	0	0	0	0	0	0	0	0	0	0	0	0	0	0	0	0	0	0	0	0	0	0	0	0	0	0	0	0	1	0	0	0	0	0	0	0
d__Bacteria	k__norank_d__Bacteria	p__Acidobacteriota	c__Thermoanaerobaculia	o__Thermoanaerobaculales	f__Thermoanaerobaculaceae	g__Subgroup_10	s__unclassified_g__Subgroup_10	ASV51547	12	0	0	0	0	0	0	0	0	0	0	0	0	0	0	0	0	0	0	0	0	0	0	0	0	0	0	0	0	0	0	0	0	0	0	0	0	0	0	0	0
d__Bacteria	k__norank_d__Bacteria	p__unclassified_k__norank_d__Bacteria	c__unclassified_k__norank_d__Bacteria	o__unclassified_k__norank_d__Bacteria	f__unclassified_k__norank_d__Bacteria	g__unclassified_k__norank_d__Bacteria	s__unclassified_k__norank_d__Bacteria	ASV96830	0	0	0	0	0	0	0	0	0	0	0	0	0	0	0	0	0	0	0	0	0	0	0	0	0	0	0	0	0	0	0	0	0	0	0	0	0	0	0	0	2
d__Bacteria	k__norank_d__Bacteria	p__Bacteroidota	c__Bacteroidia	o__Cytophagales	f__Cyclobacteriaceae	g__Fulvivirga	s__unclassified_g__Fulvivirga	ASV20373	0	0	0	0	0	0	0	0	0	0	0	0	0	0	0	0	0	0	0	0	0	0	12	0	30	10	0	0	0	0	0	0	0	0	4	0	0	0	0	0	0
d__Bacteria	k__norank_d__Bacteria	p__Desulfobacterota	c__Desulfobacteria	o__Desulfatiglandales	f__Desulfatiglandaceae	g__Desulfatiglans	s__unclassified_g__Desulfatiglans	ASV50735	0	4	0	0	5	8	0	0	0	0	0	0	0	0	0	0	0	0	0	0	0	0	0	0	0	0	0	0	0	0	0	0	0	0	0	0	0	0	0	0	0
d__Bacteria	k__norank_d__Bacteria	p__Actinobacteriota	c__Thermoleophilia	o__Solirubrobacterales	f__67-14	g__norank_f__67-14	s__unclassified_g__norank_f__67-14	ASV62291	0	0	0	0	0	0	0	0	0	0	0	0	0	2	0	0	0	0	0	0	0	0	0	0	0	0	0	0	0	0	0	0	0	0	0	0	0	0	0	0	0
d__Bacteria	k__norank_d__Bacteria	p__Planctomycetota	c__OM190	o__norank_c__OM190	f__norank_c__OM190	g__norank_c__OM190	s__unclassified_g__norank_c__OM190	ASV92935	0	0	0	0	0	0	0	0	0	0	0	4	0	0	0	0	0	0	0	0	0	0	0	0	0	0	0	0	0	0	0	0	0	0	0	0	0	0	0	0	0
d__Bacteria	k__norank_d__Bacteria	p__Proteobacteria	c__Gammaproteobacteria	o__Arenicellales	f__Arenicellaceae	g__unclassified_f__Arenicellaceae	s__unclassified_f__Arenicellaceae	ASV26308	0	0	0	0	0	0	0	0	0	0	0	0	0	0	0	0	0	0	0	0	0	2	0	0	0	0	0	0	0	0	0	0	0	0	0	0	1	0	0	0	0
d__Bacteria	k__norank_d__Bacteria	p__Firmicutes	c__Clostridia	o__Lachnospirales	f__Defluviitaleaceae	g__Defluviitaleaceae_UCG-011	s__uncultured_bacterium_g__Defluviitaleaceae_UCG-011	ASV52330	3	0	0	0	0	0	0	0	0	0	0	0	0	0	0	0	0	0	0	0	0	0	0	0	0	0	0	0	0	0	0	0	0	0	0	0	0	0	0	0	0
d__Bacteria	k__norank_d__Bacteria	p__Firmicutes	c__Clostridia	o__Peptostreptococcales-Tissierellales	f__norank_o__Peptostreptococcales-Tissierellales	g__unclassified_f__norank_o__Peptostreptococcales-Tissierellales	s__unclassified_f__norank_o__Peptostreptococcales-Tissierellales	ASV63518	0	0	0	0	0	0	0	0	0	0	0	0	0	0	0	0	0	0	0	0	0	0	0	0	0	0	0	0	0	0	0	0	0	0	0	1	0	0	0	0	0
d__Bacteria	k__norank_d__Bacteria	p__Acidobacteriota	c__Vicinamibacteria	o__Vicinamibacterales	f__norank_o__Vicinamibacterales	g__norank_o__Vicinamibacterales	s__unclassified_g__norank_o__Vicinamibacterales	ASV14968	0	0	0	0	0	16	0	6	0	0	0	0	0	0	0	0	0	0	0	0	0	0	0	0	0	0	0	0	0	0	0	0	0	0	0	0	0	0	0	0	0
d__Bacteria	k__norank_d__Bacteria	p__Actinobacteriota	c__Actinobacteria	o__Propionibacteriales	f__Nocardioidaceae	g__Nocardioides	s__unclassified_g__Nocardioides	ASV59341	0	0	0	0	0	0	0	0	0	0	0	0	0	0	0	0	0	0	0	0	0	0	0	0	0	0	0	0	0	0	0	0	0	0	0	0	0	0	0	0	0
d__Bacteria	k__norank_d__Bacteria	p__Bacteroidota	c__Rhodothermia	o__Rhodothermales	f__Rhodothermaceae	g__norank_f__Rhodothermaceae	s__uncultured_bacterium_f__Rhodothermaceae	ASV97576	0	0	0	0	0	0	0	0	0	0	0	0	0	0	0	0	0	0	0	0	0	0	0	0	4	0	0	0	0	0	0	0	0	0	0	0	0	0	0	0	0
d__Bacteria	k__norank_d__Bacteria	p__Proteobacteria	c__Gammaproteobacteria	o__Steroidobacterales	f__Steroidobacteraceae	g__norank_f__Steroidobacteraceae	s__unclassified_g__norank_f__Steroidobacteraceae	ASV69952	0	0	0	0	0	0	0	0	0	0	10	0	0	0	0	0	0	0	0	0	0	0	0	0	0	0	0	0	0	0	0	0	0	0	0	0	0	0	0	0	0
d__Bacteria	k__norank_d__Bacteria	p__Bdellovibrionota	c__Oligoflexia	o__0319-6G20	f__norank_o__0319-6G20	g__norank_o__0319-6G20	s__uncultured_organism_o__0319-6G20	ASV23844	0	0	0	0	0	0	0	0	0	0	0	0	0	0	0	0	0	2	0	0	0	0	0	0	0	0	0	0	0	0	0	0	0	0	0	0	0	0	0	0	0
d__Bacteria	k__norank_d__Bacteria	p__SAR324_cladeMarine_group_B	c__norank_p__SAR324_cladeMarine_group_B	o__norank_p__SAR324_cladeMarine_group_B	f__norank_p__SAR324_cladeMarine_group_B	g__norank_p__SAR324_cladeMarine_group_B	s__unclassified_g__norank_p__SAR324_cladeMarine_group_B	ASV66305	0	0	2	0	0	0	0	0	0	0	0	0	0	0	0	0	0	0	0	0	0	0	0	0	0	0	0	0	0	0	0	0	0	0	0	0	0	0	0	0	0
d__Bacteria	k__norank_d__Bacteria	p__Proteobacteria	c__Alphaproteobacteria	o__Caulobacterales	f__Hyphomonadaceae	g__Hirschia	s__unclassified_g__Hirschia	ASV20532	0	0	0	0	0	0	0	0	0	0	0	0	0	0	0	0	0	0	0	0	0	0	0	0	0	0	0	0	0	0	0	0	0	0	2	0	0	0	0	0	0
d__Bacteria	k__norank_d__Bacteria	p__Verrucomicrobiota	c__Omnitrophia	o__Omnitrophales	f__Omnitrophaceae	g__Candidatus_Omnitrophus	s__uncultured_bacterium_g__Candidatus_Omnitrophus	ASV4315	0	0	0	0	0	0	0	0	0	0	0	0	0	0	4	0	0	0	0	0	0	0	0	0	0	0	0	0	0	0	0	0	0	0	0	0	0	0	0	0	0
d__Bacteria	k__norank_d__Bacteria	p__Chloroflexi	c__KD4-96	o__norank_c__KD4-96	f__norank_c__KD4-96	g__norank_c__KD4-96	s__unclassified_g__norank_c__KD4-96	ASV94043	0	0	0	0	0	0	0	0	0	0	0	0	0	0	0	0	0	0	0	0	0	0	0	0	0	0	0	0	0	0	0	0	0	0	0	0	0	0	0	0	0
d__Bacteria	k__norank_d__Bacteria	p__Chloroflexi	c__Anaerolineae	o__SBR1031	f__A4b	g__norank_f__A4b	s__unclassified_g__norank_f__A4b	ASV18004	0	0	0	0	0	0	0	0	0	0	0	0	0	0	0	0	0	0	0	0	0	0	0	0	0	0	2	0	0	0	0	0	0	0	0	0	0	0	0	0	0
d__Bacteria	k__norank_d__Bacteria	p__Actinobacteriota	c__Actinobacteria	o__Frankiales	f__Acidothermaceae	g__Acidothermus	s__uncultured_actinobacterium_g__Acidothermus	ASV95883	0	0	0	0	0	0	0	0	0	0	0	0	0	0	0	0	0	0	0	0	0	0	0	0	0	0	0	0	0	0	0	0	0	0	0	0	0	0	0	0	6
d__Bacteria	k__norank_d__Bacteria	p__Proteobacteria	c__Alphaproteobacteria	o__Parvibaculales	f__PS1_clade	g__norank_f__PS1_clade	s__uncultured_bacterium_f__PS1_clade	ASV7747	0	0	0	0	0	0	0	0	0	0	0	0	0	0	0	0	0	0	0	0	0	0	0	0	0	0	7	0	11	43	0	0	0	0	0	0	2	0	0	0	0
d__Bacteria	k__norank_d__Bacteria	p__Actinobacteriota	c__WCHB1-81	o__norank_c__WCHB1-81	f__norank_c__WCHB1-81	g__norank_c__WCHB1-81	s__uncultured_bacterium_c__WCHB1-81	ASV96290	0	0	0	0	0	0	0	0	0	0	0	0	0	0	0	0	0	0	0	0	0	0	0	0	0	0	0	0	0	0	0	0	0	0	0	0	0	0	0	0	3
d__Bacteria	k__norank_d__Bacteria	p__Proteobacteria	c__Gammaproteobacteria	o__KI89A_clade	f__norank_o__KI89A_clade	g__norank_o__KI89A_clade	s__unclassified_g__norank_o__KI89A_clade	ASV36037	0	0	0	0	0	0	0	0	0	0	0	0	0	0	0	0	0	0	0	0	0	0	0	0	0	0	0	6	0	0	0	0	0	0	0	0	0	0	0	0	0
d__Bacteria	k__norank_d__Bacteria	p__Bacteroidota	c__Bacteroidia	o__Flavobacteriales	f__NS9_marine_group	g__norank_f__NS9_marine_group	s__unclassified_g__norank_f__NS9_marine_group	ASV38190	0	0	0	0	0	0	0	0	0	0	0	0	0	0	0	0	0	0	3	0	0	0	0	0	0	0	0	0	0	0	0	0	0	0	0	0	0	0	0	0	0
d__Bacteria	k__norank_d__Bacteria	p__Firmicutes	c__Bacilli	o__Erysipelotrichales	f__Erysipelotrichaceae	g__Erysipelothrix	s__unclassified_g__Erysipelothrix	ASV42722	0	0	0	0	0	0	0	0	0	0	0	0	0	0	0	0	0	0	0	1	0	0	0	0	0	0	0	0	0	0	0	0	0	0	0	0	0	0	0	0	0
d__Bacteria	k__norank_d__Bacteria	p__Proteobacteria	c__Alphaproteobacteria	o__Rhodobacterales	f__Rhodobacteraceae	g__unclassified_f__Rhodobacteraceae	s__unclassified_f__Rhodobacteraceae	ASV20477	0	0	0	0	0	0	0	0	0	0	0	0	0	0	0	0	0	0	0	0	0	0	0	0	0	0	0	0	0	0	0	0	0	0	2	0	0	0	0	0	0
d__Bacteria	k__norank_d__Bacteria	p__Myxococcota	c__Polyangia	o__UASB-TL25	f__norank_o__UASB-TL25	g__norank_o__UASB-TL25	s__uncultured_bacterium_o__UASB-TL25	ASV10394	0	0	0	0	0	0	0	0	0	0	0	0	0	0	0	0	0	0	0	0	0	0	0	0	0	0	0	0	2	0	0	0	0	0	0	0	0	0	0	0	0
d__Bacteria	k__norank_d__Bacteria	p__Proteobacteria	c__Gammaproteobacteria	o__unclassified_c__Gammaproteobacteria	f__unclassified_c__Gammaproteobacteria	g__unclassified_c__Gammaproteobacteria	s__unclassified_c__Gammaproteobacteria	ASV24877	0	0	0	0	0	0	0	0	0	0	0	0	0	0	0	0	0	2	0	0	0	0	0	0	0	0	0	0	0	0	0	0	0	0	0	0	0	0	0	0	0
d__Bacteria	k__norank_d__Bacteria	p__Chloroflexi	c__Dehalococcoidia	o__S085	f__norank_o__S085	g__norank_o__S085	s__uncultured_bacterium_o__S085	ASV79126	0	0	0	0	0	0	0	0	0	0	0	0	0	0	0	0	0	0	0	0	0	0	0	0	0	0	0	0	0	0	0	2	0	0	0	0	0	0	0	0	0
d__Bacteria	k__norank_d__Bacteria	p__Planctomycetota	c__Phycisphaerae	o__Phycisphaerales	f__Phycisphaeraceae	g__Urania-1B-19_marine_sediment_group	s__unclassified_g__Urania-1B-19_marine_sediment_group	ASV78244	0	0	0	0	0	0	0	0	0	0	0	0	0	0	0	0	0	0	0	0	0	0	0	0	0	0	0	0	0	3	0	5	0	0	0	0	0	0	0	0	0
d__Bacteria	k__norank_d__Bacteria	p__Actinobacteriota	c__Actinobacteria	o__unclassified_c__Actinobacteria	f__unclassified_c__Actinobacteria	g__unclassified_c__Actinobacteria	s__unclassified_c__Actinobacteria	ASV30176	0	0	0	0	0	0	0	0	0	0	0	0	0	0	0	0	0	0	0	0	0	0	2	0	0	0	0	0	0	0	0	0	0	0	0	0	0	0	0	0	0
d__Bacteria	k__norank_d__Bacteria	p__Proteobacteria	c__Alphaproteobacteria	o__Kiloniellales	f__Kiloniellaceae	g__norank_f__Kiloniellaceae	s__unclassified_g__norank_f__Kiloniellaceae	ASV47277	0	0	0	1	0	0	0	0	0	0	0	0	0	0	0	0	0	0	0	0	0	0	0	0	0	0	0	0	0	0	0	0	0	0	0	0	0	0	0	0	0
d__Bacteria	k__norank_d__Bacteria	p__Proteobacteria	c__Gammaproteobacteria	o__unclassified_c__Gammaproteobacteria	f__unclassified_c__Gammaproteobacteria	g__unclassified_c__Gammaproteobacteria	s__unclassified_c__Gammaproteobacteria	ASV3321	0	0	0	0	0	0	0	0	0	0	0	0	0	17	15	0	0	0	0	0	0	0	0	0	0	0	0	0	0	0	0	0	0	0	0	0	0	0	0	0	0
d__Bacteria	k__norank_d__Bacteria	p__Myxococcota	c__Polyangia	o__Polyangiales	f__Sandaracinaceae	g__norank_f__Sandaracinaceae	s__unclassified_g__norank_f__Sandaracinaceae	ASV101094	0	0	0	0	0	0	0	0	0	0	0	0	0	0	0	0	2	0	0	0	0	0	0	0	0	0	0	0	0	0	0	0	0	0	0	0	0	0	0	0	0
d__Bacteria	k__norank_d__Bacteria	p__Campilobacterota	c__Campylobacteria	o__Campylobacterales	f__Sulfurimonadaceae	g__Sulfurimonas	s__unclassified_g__Sulfurimonas	ASV39315	0	0	0	0	0	0	0	0	0	0	0	0	0	0	0	0	0	0	1	0	0	0	0	0	0	0	0	0	0	0	0	0	0	0	0	0	0	0	0	0	0
d__Bacteria	k__norank_d__Bacteria	p__SAR324_cladeMarine_group_B	c__norank_p__SAR324_cladeMarine_group_B	o__norank_p__SAR324_cladeMarine_group_B	f__norank_p__SAR324_cladeMarine_group_B	g__norank_p__SAR324_cladeMarine_group_B	s__unclassified_g__norank_p__SAR324_cladeMarine_group_B	ASV31890	0	0	0	0	0	0	0	0	0	0	0	0	0	0	0	0	0	0	0	0	0	0	0	0	0	0	0	0	0	0	0	0	0	0	0	0	3	0	0	0	0
d__Bacteria	k__norank_d__Bacteria	p__Firmicutes	c__Clostridia	o__Clostridiales	f__Clostridiaceae	g__Clostridium_sensu_stricto_13	s__unclassified_g__Clostridium_sensu_stricto_13	ASV43252	30	14	12	11	45	8	41	0	16	0	0	0	0	0	0	0	0	0	0	0	0	0	0	0	0	0	0	0	0	0	0	0	0	0	0	0	0	0	0	11	0
d__Bacteria	k__norank_d__Bacteria	p__Proteobacteria	c__Gammaproteobacteria	o__Gammaproteobacteria_Incertae_Sedis	f__unclassified_o__Gammaproteobacteria_Incertae_Sedis	g__Candidatus_Berkiella	s__uncultured_bacterium_g__Candidatus_Berkiella	ASV31754	0	0	0	0	0	0	0	0	0	0	0	0	0	0	0	0	0	0	0	0	0	0	0	0	0	0	0	0	0	0	0	0	0	0	0	0	2	0	0	0	0
d__Bacteria	k__norank_d__Bacteria	p__Proteobacteria	c__Gammaproteobacteria	o__norank_c__Gammaproteobacteria	f__norank_c__Gammaproteobacteria	g__norank_c__Gammaproteobacteria	s__uncultured_bacterium_c__Gammaproteobacteria	ASV24481	0	0	0	0	0	0	0	0	0	0	0	0	0	0	0	0	0	2	0	0	0	0	0	0	0	0	0	0	0	0	0	0	0	0	0	0	0	0	0	0	0
d__Bacteria	k__norank_d__Bacteria	p__Actinobacteriota	c__Actinobacteria	o__unclassified_c__Actinobacteria	f__unclassified_c__Actinobacteria	g__unclassified_c__Actinobacteria	s__unclassified_c__Actinobacteria	ASV34776	0	0	0	0	0	0	0	0	0	0	0	0	0	0	0	0	0	0	0	0	0	0	0	0	0	0	0	0	0	0	0	0	0	0	0	0	0	0	0	0	0
d__Bacteria	k__norank_d__Bacteria	p__Chloroflexi	c__KD4-96	o__norank_c__KD4-96	f__norank_c__KD4-96	g__norank_c__KD4-96	s__uncultured_bacterium_c__KD4-96	ASV341	0	0	0	19	0	0	0	0	0	0	0	0	0	0	0	0	0	0	0	0	0	0	0	0	0	0	0	0	0	0	0	0	0	0	0	0	0	0	0	24	21
d__Bacteria	k__norank_d__Bacteria	p__Desulfobacterota	c__Desulfobacteria	o__Desulfobacterales	f__Desulfosarcinaceae	g__norank_f__Desulfosarcinaceae	s__unclassified_g__norank_f__Desulfosarcinaceae	ASV34088	0	0	0	0	0	0	0	0	0	0	0	0	0	0	0	0	0	0	0	0	0	0	0	0	0	0	0	0	0	0	0	0	0	0	0	0	0	0	0	0	0
d__Bacteria	k__norank_d__Bacteria	p__Proteobacteria	c__Alphaproteobacteria	o__unclassified_c__Alphaproteobacteria	f__unclassified_c__Alphaproteobacteria	g__unclassified_c__Alphaproteobacteria	s__unclassified_c__Alphaproteobacteria	ASV20249	0	0	0	0	0	0	0	0	0	0	0	0	0	0	0	0	0	0	0	0	0	0	0	0	0	0	0	0	0	0	0	0	0	0	2	0	0	0	0	0	0
d__Bacteria	k__norank_d__Bacteria	p__Proteobacteria	c__Gammaproteobacteria	o__KI89A_clade	f__norank_o__KI89A_clade	g__norank_o__KI89A_clade	s__unclassified_g__norank_o__KI89A_clade	ASV89787	0	0	0	0	0	0	0	0	0	0	0	0	0	0	0	0	0	0	0	0	79	0	0	0	0	0	0	0	0	0	0	0	0	0	0	0	0	0	0	0	0
d__Bacteria	k__norank_d__Bacteria	p__Firmicutes	c__Syntrophomonadia	o__Syntrophomonadales	f__Syntrophomonadaceae	g__unclassified_f__Syntrophomonadaceae	s__unclassified_f__Syntrophomonadaceae	ASV30570	0	0	0	0	0	0	0	0	0	0	0	0	0	0	0	0	0	0	0	0	0	0	1	0	0	0	0	0	0	0	0	0	0	0	0	0	0	0	0	0	0
d__Bacteria	k__norank_d__Bacteria	p__Patescibacteria	c__ABY1	o__Candidatus_Falkowbacteria	f__norank_o__Candidatus_Falkowbacteria	g__norank_o__Candidatus_Falkowbacteria	s__uncultured_bacterium_o__Candidatus_Falkowbacteria	ASV5065	0	0	0	0	0	0	0	0	0	0	0	0	0	0	2	0	0	0	0	0	0	0	0	0	0	0	0	0	0	0	0	0	0	0	0	0	0	0	0	0	0
d__Bacteria	k__norank_d__Bacteria	p__Myxococcota	c__Polyangia	o__VHS-B3-70	f__norank_o__VHS-B3-70	g__norank_o__VHS-B3-70	s__unclassified_g__norank_o__VHS-B3-70	ASV77505	0	0	0	0	0	0	0	0	0	0	0	0	0	0	0	0	0	0	0	0	0	0	0	0	0	0	0	0	0	0	0	0	0	0	0	0	0	0	0	0	0
d__Bacteria	k__norank_d__Bacteria	p__Proteobacteria	c__Gammaproteobacteria	o__unclassified_c__Gammaproteobacteria	f__unclassified_c__Gammaproteobacteria	g__unclassified_c__Gammaproteobacteria	s__unclassified_c__Gammaproteobacteria	ASV58366	0	0	0	0	0	0	0	0	0	0	0	0	0	0	0	0	0	0	0	0	0	0	0	0	0	0	0	0	0	0	0	0	3	0	0	0	0	0	0	0	0
d__Bacteria	k__norank_d__Bacteria	p__Gemmatimonadota	c__PAUC43f_marine_benthic_group	o__norank_c__PAUC43f_marine_benthic_group	f__norank_c__PAUC43f_marine_benthic_group	g__norank_c__PAUC43f_marine_benthic_group	s__uncultured_Gemmatimonadetes_bacterium_c__PAUC43f_marine_benthic_group	ASV37953	0	0	0	0	0	0	0	0	0	0	0	0	0	0	0	0	0	0	4	0	0	0	0	0	0	0	0	0	0	0	0	0	0	0	0	0	0	0	0	0	0
d__Bacteria	k__norank_d__Bacteria	p__Chloroflexi	c__Anaerolineae	o__norank_c__Anaerolineae	f__norank_c__Anaerolineae	g__norank_c__Anaerolineae	s__unclassified_g__norank_c__Anaerolineae	ASV64438	0	0	0	0	0	0	0	0	0	0	0	0	0	0	0	0	0	0	0	0	0	0	0	0	0	0	0	0	0	0	0	0	0	0	0	0	0	0	0	0	0
d__Bacteria	k__norank_d__Bacteria	p__Planctomycetota	c__OM190	o__norank_c__OM190	f__norank_c__OM190	g__norank_c__OM190	s__unclassified_g__norank_c__OM190	ASV50163	0	0	0	0	0	0	0	0	0	2	0	0	0	0	0	0	0	0	0	0	0	0	0	0	0	0	0	0	0	0	0	0	0	0	0	0	0	0	0	0	0
d__Bacteria	k__norank_d__Bacteria	p__MBNT15	c__norank_p__MBNT15	o__norank_p__MBNT15	f__norank_p__MBNT15	g__norank_p__MBNT15	s__uncultured_soil_bacterium_p__MBNT15	ASV17396	4	0	0	0	0	0	0	0	0	0	0	0	0	0	0	0	0	0	0	0	0	0	0	0	0	0	2	0	0	0	0	0	0	0	0	0	0	0	0	0	0
[truncated: 97,102 more rows]
[truncated: 19 more columns]
