# Supplementary material for: Divergent microbial community and functional dynamics in mangrove sediments along a polycyclic aromatic hydrocarbons (PAHs) gradient in China
Source: Research Square preprint supplement (doi:10.21203/rs.3.rs-7178259/v1), 2025-09-17
Supplement: Supplementary file 3 [file 1b9b18384d3e7e3b6699a44e.xlsx]

## Sheet: PAH_degrading_KOs
Gene ID	Location	Genome	Taxonomy	Start	End	Length (bp)	KO ID	KEGG Name	KO Description	Pathway level3
MAG1_gene1299	M1_2_2_k97_754493_ORF1285	MAG1	d__Bacteria;p__Actinomycetota;c__Acidimicrobiia;o__UBA5794;f__ZC4RG35;g__SZUA-217;s__Unclassified	15399	14539	861	K00001	adh	alcohol dehydrogenase [EC:1.1.1.1]	Metabolism of xenobiotics by cytochrome P450;Naphthalene degradation;Metabolic pathways;Degradation of aromatic compounds;Microbial metabolism in diverse environments;Fatty acid degradation;Chloroalkane and chloroalkene degradation;Tyrosine metabolism;Pyruvate metabolism;Drug metabolism - cytochrome P450;Glycolysis / Gluconeogenesis;Biosynthesis of secondary metabolites;Retinol metabolism
MAG1_gene1708	M1_2_2_k97_310682_ORF1690	MAG1	d__Bacteria;p__Actinomycetota;c__Acidimicrobiia;o__UBA5794;f__ZC4RG35;g__SZUA-217;s__Unclassified	7660	6578	1083	K00001	adh	alcohol dehydrogenase [EC:1.1.1.1]	Metabolism of xenobiotics by cytochrome P450;Naphthalene degradation;Metabolic pathways;Degradation of aromatic compounds;Microbial metabolism in diverse environments;Fatty acid degradation;Chloroalkane and chloroalkene degradation;Tyrosine metabolism;Pyruvate metabolism;Drug metabolism - cytochrome P450;Glycolysis / Gluconeogenesis;Biosynthesis of secondary metabolites;Retinol metabolism
MAG1_gene1964	M1_2_2_k97_767065_ORF1943	MAG1	d__Bacteria;p__Actinomycetota;c__Acidimicrobiia;o__UBA5794;f__ZC4RG35;g__SZUA-217;s__Unclassified	3393	4367	975	K00001	adh	alcohol dehydrogenase [EC:1.1.1.1]	Metabolism of xenobiotics by cytochrome P450;Naphthalene degradation;Metabolic pathways;Degradation of aromatic compounds;Microbial metabolism in diverse environments;Fatty acid degradation;Chloroalkane and chloroalkene degradation;Tyrosine metabolism;Pyruvate metabolism;Drug metabolism - cytochrome P450;Glycolysis / Gluconeogenesis;Biosynthesis of secondary metabolites;Retinol metabolism
MAG1_gene2218	M1_2_2_k97_747400_ORF2197	MAG1	d__Bacteria;p__Actinomycetota;c__Acidimicrobiia;o__UBA5794;f__ZC4RG35;g__SZUA-217;s__Unclassified	3159	2113	1047	K00001	adh	alcohol dehydrogenase [EC:1.1.1.1]	Metabolism of xenobiotics by cytochrome P450;Naphthalene degradation;Metabolic pathways;Degradation of aromatic compounds;Microbial metabolism in diverse environments;Fatty acid degradation;Chloroalkane and chloroalkene degradation;Tyrosine metabolism;Pyruvate metabolism;Drug metabolism - cytochrome P450;Glycolysis / Gluconeogenesis;Biosynthesis of secondary metabolites;Retinol metabolism
MAG10_gene0286	M2_2_1_k97_39567_ORF276	MAG10	d__Bacteria;p__Bacillota_A;c__Clostridia;o__DUPQ01;f__DUPQ01;g__JAFGQE01;s__Unclassified	2606	1500	1107	K00001	adh	alcohol dehydrogenase [EC:1.1.1.1]	Metabolism of xenobiotics by cytochrome P450;Naphthalene degradation;Metabolic pathways;Degradation of aromatic compounds;Microbial metabolism in diverse environments;Fatty acid degradation;Chloroalkane and chloroalkene degradation;Tyrosine metabolism;Pyruvate metabolism;Drug metabolism - cytochrome P450;Glycolysis / Gluconeogenesis;Biosynthesis of secondary metabolites;Retinol metabolism
MAG10_gene0648	M2_2_1_k97_558399_ORF637	MAG10	d__Bacteria;p__Bacillota_A;c__Clostridia;o__DUPQ01;f__DUPQ01;g__JAFGQE01;s__Unclassified	1345	182	1164	K00001	adh	alcohol dehydrogenase [EC:1.1.1.1]	Metabolism of xenobiotics by cytochrome P450;Naphthalene degradation;Metabolic pathways;Degradation of aromatic compounds;Microbial metabolism in diverse environments;Fatty acid degradation;Chloroalkane and chloroalkene degradation;Tyrosine metabolism;Pyruvate metabolism;Drug metabolism - cytochrome P450;Glycolysis / Gluconeogenesis;Biosynthesis of secondary metabolites;Retinol metabolism
MAG100_gene3075	DY_1_k97_298918_ORF3051	MAG100	d__Bacteria;p__Acidobacteriota;c__Vicinamibacteria;o__Vicinamibacterales;f__Unclassified;g__Unclassified;s__Unclassified	1390	167	1224	K00001	adh	alcohol dehydrogenase [EC:1.1.1.1]	Metabolism of xenobiotics by cytochrome P450;Naphthalene degradation;Metabolic pathways;Degradation of aromatic compounds;Microbial metabolism in diverse environments;Fatty acid degradation;Chloroalkane and chloroalkene degradation;Tyrosine metabolism;Pyruvate metabolism;Drug metabolism - cytochrome P450;Glycolysis / Gluconeogenesis;Biosynthesis of secondary metabolites;Retinol metabolism
MAG102_gene0372	M2_2_2_k97_1290585_ORF370	MAG102	d__Bacteria;p__Bacteroidota;c__Bacteroidia;o__Bacteroidales;f__Prolixibacteraceae;g__Draconibacterium;s__Unclassified	1787	774	1014	K00001	adh	alcohol dehydrogenase [EC:1.1.1.1]	Metabolism of xenobiotics by cytochrome P450;Naphthalene degradation;Metabolic pathways;Degradation of aromatic compounds;Microbial metabolism in diverse environments;Fatty acid degradation;Chloroalkane and chloroalkene degradation;Tyrosine metabolism;Pyruvate metabolism;Drug metabolism - cytochrome P450;Glycolysis / Gluconeogenesis;Biosynthesis of secondary metabolites;Retinol metabolism
MAG102_gene2779	M2_2_2_k97_506466_ORF2766	MAG102	d__Bacteria;p__Bacteroidota;c__Bacteroidia;o__Bacteroidales;f__Prolixibacteraceae;g__Draconibacterium;s__Unclassified	897	1397	501	K00001	adh	alcohol dehydrogenase [EC:1.1.1.1]	Metabolism of xenobiotics by cytochrome P450;Naphthalene degradation;Metabolic pathways;Degradation of aromatic compounds;Microbial metabolism in diverse environments;Fatty acid degradation;Chloroalkane and chloroalkene degradation;Tyrosine metabolism;Pyruvate metabolism;Drug metabolism - cytochrome P450;Glycolysis / Gluconeogenesis;Biosynthesis of secondary metabolites;Retinol metabolism
MAG102_gene2801	M2_2_2_k97_911948_ORF2788	MAG102	d__Bacteria;p__Bacteroidota;c__Bacteroidia;o__Bacteroidales;f__Prolixibacteraceae;g__Draconibacterium;s__Unclassified	1389	847	543	K00001	adh	alcohol dehydrogenase [EC:1.1.1.1]	Metabolism of xenobiotics by cytochrome P450;Naphthalene degradation;Metabolic pathways;Degradation of aromatic compounds;Microbial metabolism in diverse environments;Fatty acid degradation;Chloroalkane and chloroalkene degradation;Tyrosine metabolism;Pyruvate metabolism;Drug metabolism - cytochrome P450;Glycolysis / Gluconeogenesis;Biosynthesis of secondary metabolites;Retinol metabolism
MAG103_gene2047	FG_WR_2_k97_11091_ORF2029	MAG103	d__Bacteria;p__Bacteroidota;c__Bacteroidia;o__Bacteroidales;f__GCA-2748055;g__Unclassified;s__Unclassified	1618	449	1170	K00001	adh	alcohol dehydrogenase [EC:1.1.1.1]	Metabolism of xenobiotics by cytochrome P450;Naphthalene degradation;Metabolic pathways;Degradation of aromatic compounds;Microbial metabolism in diverse environments;Fatty acid degradation;Chloroalkane and chloroalkene degradation;Tyrosine metabolism;Pyruvate metabolism;Drug metabolism - cytochrome P450;Glycolysis / Gluconeogenesis;Biosynthesis of secondary metabolites;Retinol metabolism
MAG103_gene3342	FG_WR_2_k97_1156545_ORF3320	MAG103	d__Bacteria;p__Bacteroidota;c__Bacteroidia;o__Bacteroidales;f__GCA-2748055;g__Unclassified;s__Unclassified	1467	478	990	K00001	adh	alcohol dehydrogenase [EC:1.1.1.1]	Metabolism of xenobiotics by cytochrome P450;Naphthalene degradation;Metabolic pathways;Degradation of aromatic compounds;Microbial metabolism in diverse environments;Fatty acid degradation;Chloroalkane and chloroalkene degradation;Tyrosine metabolism;Pyruvate metabolism;Drug metabolism - cytochrome P450;Glycolysis / Gluconeogenesis;Biosynthesis of secondary metabolites;Retinol metabolism
MAG103_gene3580	FG_WR_2_k97_176639_ORF3556	MAG103	d__Bacteria;p__Bacteroidota;c__Bacteroidia;o__Bacteroidales;f__GCA-2748055;g__Unclassified;s__Unclassified	3	956	954	K00001	adh	alcohol dehydrogenase [EC:1.1.1.1]	Metabolism of xenobiotics by cytochrome P450;Naphthalene degradation;Metabolic pathways;Degradation of aromatic compounds;Microbial metabolism in diverse environments;Fatty acid degradation;Chloroalkane and chloroalkene degradation;Tyrosine metabolism;Pyruvate metabolism;Drug metabolism - cytochrome P450;Glycolysis / Gluconeogenesis;Biosynthesis of secondary metabolites;Retinol metabolism
MAG104_gene0729	M2_1_3_k97_1757607_ORF722	MAG104	d__Bacteria;p__Pseudomonadota;c__Gammaproteobacteria;o__Chromatiales;f__Sedimenticolaceae;g__Sva-25;s__Unclassified	1643	447	1197	K00001	adh	alcohol dehydrogenase [EC:1.1.1.1]	Metabolism of xenobiotics by cytochrome P450;Naphthalene degradation;Metabolic pathways;Degradation of aromatic compounds;Microbial metabolism in diverse environments;Fatty acid degradation;Chloroalkane and chloroalkene degradation;Tyrosine metabolism;Pyruvate metabolism;Drug metabolism - cytochrome P450;Glycolysis / Gluconeogenesis;Biosynthesis of secondary metabolites;Retinol metabolism
MAG106_gene2242	FG_SC_2_k97_999704_ORF2226	MAG106	d__Bacteria;p__Pseudomonadota;c__Gammaproteobacteria;o__Steroidobacterales;f__Steroidobacteraceae;g__SG8-30;s__Unclassified	644	1723	1080	K00001	adh	alcohol dehydrogenase [EC:1.1.1.1]	Metabolism of xenobiotics by cytochrome P450;Naphthalene degradation;Metabolic pathways;Degradation of aromatic compounds;Microbial metabolism in diverse environments;Fatty acid degradation;Chloroalkane and chloroalkene degradation;Tyrosine metabolism;Pyruvate metabolism;Drug metabolism - cytochrome P450;Glycolysis / Gluconeogenesis;Biosynthesis of secondary metabolites;Retinol metabolism
MAG107_gene2559	M2_1_1_k97_817563_ORF2544	MAG107	d__Bacteria;p__Desulfobacterota;c__Desulfobacteria;o__Desulfobacterales;f__B30-G6;g__Unclassified;s__Unclassified	2883	1876	1008	K00001	adh	alcohol dehydrogenase [EC:1.1.1.1]	Metabolism of xenobiotics by cytochrome P450;Naphthalene degradation;Metabolic pathways;Degradation of aromatic compounds;Microbial metabolism in diverse environments;Fatty acid degradation;Chloroalkane and chloroalkene degradation;Tyrosine metabolism;Pyruvate metabolism;Drug metabolism - cytochrome P450;Glycolysis / Gluconeogenesis;Biosynthesis of secondary metabolites;Retinol metabolism
MAG108_gene2092	M1_1_1_k97_823150_ORF2063	MAG108	d__Bacteria;p__Pseudomonadota;c__Alphaproteobacteria;o__Rhizobiales;f__Methyloligellaceae;g__Methyloceanibacter;s__Unclassified	3614	3048	567	K00001	adh	alcohol dehydrogenase [EC:1.1.1.1]	Metabolism of xenobiotics by cytochrome P450;Naphthalene degradation;Metabolic pathways;Degradation of aromatic compounds;Microbial metabolism in diverse environments;Fatty acid degradation;Chloroalkane and chloroalkene degradation;Tyrosine metabolism;Pyruvate metabolism;Drug metabolism - cytochrome P450;Glycolysis / Gluconeogenesis;Biosynthesis of secondary metabolites;Retinol metabolism
MAG109_gene1273	CPT_LW_1_k97_897185_ORF1269	MAG109	d__Bacteria;p__Chloroflexota;c__Anaerolineae;o__Anaerolineales;f__UBA4823;g__PFL25;s__Unclassified	3640	4644	1005	K00001	adh	alcohol dehydrogenase [EC:1.1.1.1]	Metabolism of xenobiotics by cytochrome P450;Naphthalene degradation;Metabolic pathways;Degradation of aromatic compounds;Microbial metabolism in diverse environments;Fatty acid degradation;Chloroalkane and chloroalkene degradation;Tyrosine metabolism;Pyruvate metabolism;Drug metabolism - cytochrome P450;Glycolysis / Gluconeogenesis;Biosynthesis of secondary metabolites;Retinol metabolism
MAG109_gene1797	CPT_LW_1_k97_811503_ORF1789	MAG109	d__Bacteria;p__Chloroflexota;c__Anaerolineae;o__Anaerolineales;f__UBA4823;g__PFL25;s__Unclassified	156	1196	1041	K00001	adh	alcohol dehydrogenase [EC:1.1.1.1]	Metabolism of xenobiotics by cytochrome P450;Naphthalene degradation;Metabolic pathways;Degradation of aromatic compounds;Microbial metabolism in diverse environments;Fatty acid degradation;Chloroalkane and chloroalkene degradation;Tyrosine metabolism;Pyruvate metabolism;Drug metabolism - cytochrome P450;Glycolysis / Gluconeogenesis;Biosynthesis of secondary metabolites;Retinol metabolism
MAG109_gene2877	CPT_LW_1_k97_891347_ORF2863	MAG109	d__Bacteria;p__Chloroflexota;c__Anaerolineae;o__Anaerolineales;f__UBA4823;g__PFL25;s__Unclassified	2427	1777	651	K00001	adh	alcohol dehydrogenase [EC:1.1.1.1]	Metabolism of xenobiotics by cytochrome P450;Naphthalene degradation;Metabolic pathways;Degradation of aromatic compounds;Microbial metabolism in diverse environments;Fatty acid degradation;Chloroalkane and chloroalkene degradation;Tyrosine metabolism;Pyruvate metabolism;Drug metabolism - cytochrome P450;Glycolysis / Gluconeogenesis;Biosynthesis of secondary metabolites;Retinol metabolism
MAG109_gene3658	CPT_LW_1_k97_703619_ORF3636	MAG109	d__Bacteria;p__Chloroflexota;c__Anaerolineae;o__Anaerolineales;f__UBA4823;g__PFL25;s__Unclassified	3	686	684	K00001	adh	alcohol dehydrogenase [EC:1.1.1.1]	Metabolism of xenobiotics by cytochrome P450;Naphthalene degradation;Metabolic pathways;Degradation of aromatic compounds;Microbial metabolism in diverse environments;Fatty acid degradation;Chloroalkane and chloroalkene degradation;Tyrosine metabolism;Pyruvate metabolism;Drug metabolism - cytochrome P450;Glycolysis / Gluconeogenesis;Biosynthesis of secondary metabolites;Retinol metabolism
MAG11_gene1816	M2_2_1_k97_330885_ORF1807	MAG11	d__Bacteria;p__Pseudomonadota;c__Gammaproteobacteria;o__Woeseiales;f__Woeseiaceae;g__UBA1847;s__Unclassified	2881	2141	741	K00001	adh	alcohol dehydrogenase [EC:1.1.1.1]	Metabolism of xenobiotics by cytochrome P450;Naphthalene degradation;Metabolic pathways;Degradation of aromatic compounds;Microbial metabolism in diverse environments;Fatty acid degradation;Chloroalkane and chloroalkene degradation;Tyrosine metabolism;Pyruvate metabolism;Drug metabolism - cytochrome P450;Glycolysis / Gluconeogenesis;Biosynthesis of secondary metabolites;Retinol metabolism
MAG110_gene5385	M2_2_1_k97_848037_ORF5373	MAG110	d__Bacteria;p__Myxococcota;c__Polyangia;o__GCA-2747355;f__Unclassified;g__Unclassified;s__Unclassified	771	1	771	K00001	adh	alcohol dehydrogenase [EC:1.1.1.1]	Metabolism of xenobiotics by cytochrome P450;Naphthalene degradation;Metabolic pathways;Degradation of aromatic compounds;Microbial metabolism in diverse environments;Fatty acid degradation;Chloroalkane and chloroalkene degradation;Tyrosine metabolism;Pyruvate metabolism;Drug metabolism - cytochrome P450;Glycolysis / Gluconeogenesis;Biosynthesis of secondary metabolites;Retinol metabolism
MAG111_gene0687	CPT_SW_2_k97_61662_ORF683	MAG111	d__Bacteria;p__Chloroflexota;c__Anaerolineae;o__Anaerolineales;f__UBA4823;g__PFL25;s__Unclassified	3	929	927	K00001	adh	alcohol dehydrogenase [EC:1.1.1.1]	Metabolism of xenobiotics by cytochrome P450;Naphthalene degradation;Metabolic pathways;Degradation of aromatic compounds;Microbial metabolism in diverse environments;Fatty acid degradation;Chloroalkane and chloroalkene degradation;Tyrosine metabolism;Pyruvate metabolism;Drug metabolism - cytochrome P450;Glycolysis / Gluconeogenesis;Biosynthesis of secondary metabolites;Retinol metabolism
MAG111_gene0864	CPT_SW_2_k97_962006_ORF859	MAG111	d__Bacteria;p__Chloroflexota;c__Anaerolineae;o__Anaerolineales;f__UBA4823;g__PFL25;s__Unclassified	1461	532	930	K00001	adh	alcohol dehydrogenase [EC:1.1.1.1]	Metabolism of xenobiotics by cytochrome P450;Naphthalene degradation;Metabolic pathways;Degradation of aromatic compounds;Microbial metabolism in diverse environments;Fatty acid degradation;Chloroalkane and chloroalkene degradation;Tyrosine metabolism;Pyruvate metabolism;Drug metabolism - cytochrome P450;Glycolysis / Gluconeogenesis;Biosynthesis of secondary metabolites;Retinol metabolism
MAG111_gene2482	CPT_SW_2_k97_240885_ORF2465	MAG111	d__Bacteria;p__Chloroflexota;c__Anaerolineae;o__Anaerolineales;f__UBA4823;g__PFL25;s__Unclassified	671	3	669	K00001	adh	alcohol dehydrogenase [EC:1.1.1.1]	Metabolism of xenobiotics by cytochrome P450;Naphthalene degradation;Metabolic pathways;Degradation of aromatic compounds;Microbial metabolism in diverse environments;Fatty acid degradation;Chloroalkane and chloroalkene degradation;Tyrosine metabolism;Pyruvate metabolism;Drug metabolism - cytochrome P450;Glycolysis / Gluconeogenesis;Biosynthesis of secondary metabolites;Retinol metabolism
MAG111_gene2483	CPT_SW_2_k97_240885_ORF2466	MAG111	d__Bacteria;p__Chloroflexota;c__Anaerolineae;o__Anaerolineales;f__UBA4823;g__PFL25;s__Unclassified	1722	718	1005	K00001	adh	alcohol dehydrogenase [EC:1.1.1.1]	Metabolism of xenobiotics by cytochrome P450;Naphthalene degradation;Metabolic pathways;Degradation of aromatic compounds;Microbial metabolism in diverse environments;Fatty acid degradation;Chloroalkane and chloroalkene degradation;Tyrosine metabolism;Pyruvate metabolism;Drug metabolism - cytochrome P450;Glycolysis / Gluconeogenesis;Biosynthesis of secondary metabolites;Retinol metabolism
MAG111_gene2522	CPT_SW_2_k97_903303_ORF2505	MAG111	d__Bacteria;p__Chloroflexota;c__Anaerolineae;o__Anaerolineales;f__UBA4823;g__PFL25;s__Unclassified	2443	1793	651	K00001	adh	alcohol dehydrogenase [EC:1.1.1.1]	Metabolism of xenobiotics by cytochrome P450;Naphthalene degradation;Metabolic pathways;Degradation of aromatic compounds;Microbial metabolism in diverse environments;Fatty acid degradation;Chloroalkane and chloroalkene degradation;Tyrosine metabolism;Pyruvate metabolism;Drug metabolism - cytochrome P450;Glycolysis / Gluconeogenesis;Biosynthesis of secondary metabolites;Retinol metabolism
MAG112_gene1416	M2_2_3_k97_1762119_ORF1402	MAG112	d__Bacteria;p__Bacteroidota;c__Bacteroidia;o__Bacteroidales;f__GCA-2748055;g__GCA-2748055;s__Unclassified	2220	2807	588	K00001	adh	alcohol dehydrogenase [EC:1.1.1.1]	Metabolism of xenobiotics by cytochrome P450;Naphthalene degradation;Metabolic pathways;Degradation of aromatic compounds;Microbial metabolism in diverse environments;Fatty acid degradation;Chloroalkane and chloroalkene degradation;Tyrosine metabolism;Pyruvate metabolism;Drug metabolism - cytochrome P450;Glycolysis / Gluconeogenesis;Biosynthesis of secondary metabolites;Retinol metabolism
MAG113_gene1014	M2_1_1_k97_559966_ORF1011	MAG113	d__Bacteria;p__Pseudomonadota;c__Alphaproteobacteria;o__Rhizobiales;f__Rhizobiaceae;g__Salaquimonas;s__Unclassified	481	1551	1071	K00001	adh	alcohol dehydrogenase [EC:1.1.1.1]	Metabolism of xenobiotics by cytochrome P450;Naphthalene degradation;Metabolic pathways;Degradation of aromatic compounds;Microbial metabolism in diverse environments;Fatty acid degradation;Chloroalkane and chloroalkene degradation;Tyrosine metabolism;Pyruvate metabolism;Drug metabolism - cytochrome P450;Glycolysis / Gluconeogenesis;Biosynthesis of secondary metabolites;Retinol metabolism
MAG113_gene1498	M2_1_1_k97_966914_ORF1491	MAG113	d__Bacteria;p__Pseudomonadota;c__Alphaproteobacteria;o__Rhizobiales;f__Rhizobiaceae;g__Salaquimonas;s__Unclassified	6115	4970	1146	K00001	adh	alcohol dehydrogenase [EC:1.1.1.1]	Metabolism of xenobiotics by cytochrome P450;Naphthalene degradation;Metabolic pathways;Degradation of aromatic compounds;Microbial metabolism in diverse environments;Fatty acid degradation;Chloroalkane and chloroalkene degradation;Tyrosine metabolism;Pyruvate metabolism;Drug metabolism - cytochrome P450;Glycolysis / Gluconeogenesis;Biosynthesis of secondary metabolites;Retinol metabolism
MAG113_gene1620	M2_1_1_k97_108757_ORF1612	MAG113	d__Bacteria;p__Pseudomonadota;c__Alphaproteobacteria;o__Rhizobiales;f__Rhizobiaceae;g__Salaquimonas;s__Unclassified	5479	4442	1038	K00001	adh	alcohol dehydrogenase [EC:1.1.1.1]	Metabolism of xenobiotics by cytochrome P450;Naphthalene degradation;Metabolic pathways;Degradation of aromatic compounds;Microbial metabolism in diverse environments;Fatty acid degradation;Chloroalkane and chloroalkene degradation;Tyrosine metabolism;Pyruvate metabolism;Drug metabolism - cytochrome P450;Glycolysis / Gluconeogenesis;Biosynthesis of secondary metabolites;Retinol metabolism
MAG113_gene1822	M2_1_1_k97_1316418_ORF1810	MAG113	d__Bacteria;p__Pseudomonadota;c__Alphaproteobacteria;o__Rhizobiales;f__Rhizobiaceae;g__Salaquimonas;s__Unclassified	852	1883	1032	K00001	adh	alcohol dehydrogenase [EC:1.1.1.1]	Metabolism of xenobiotics by cytochrome P450;Naphthalene degradation;Metabolic pathways;Degradation of aromatic compounds;Microbial metabolism in diverse environments;Fatty acid degradation;Chloroalkane and chloroalkene degradation;Tyrosine metabolism;Pyruvate metabolism;Drug metabolism - cytochrome P450;Glycolysis / Gluconeogenesis;Biosynthesis of secondary metabolites;Retinol metabolism
MAG114_gene1822	CPT_SW_3_k97_141613_ORF1813	MAG114	d__Bacteria;p__Chloroflexota;c__Anaerolineae;o__Anaerolineales;f__UBA4823;g__PFL25;s__Unclassified	1544	528	1017	K00001	adh	alcohol dehydrogenase [EC:1.1.1.1]	Metabolism of xenobiotics by cytochrome P450;Naphthalene degradation;Metabolic pathways;Degradation of aromatic compounds;Microbial metabolism in diverse environments;Fatty acid degradation;Chloroalkane and chloroalkene degradation;Tyrosine metabolism;Pyruvate metabolism;Drug metabolism - cytochrome P450;Glycolysis / Gluconeogenesis;Biosynthesis of secondary metabolites;Retinol metabolism
MAG114_gene1823	CPT_SW_3_k97_141613_ORF1814	MAG114	d__Bacteria;p__Chloroflexota;c__Anaerolineae;o__Anaerolineales;f__UBA4823;g__PFL25;s__Unclassified	2595	1591	1005	K00001	adh	alcohol dehydrogenase [EC:1.1.1.1]	Metabolism of xenobiotics by cytochrome P450;Naphthalene degradation;Metabolic pathways;Degradation of aromatic compounds;Microbial metabolism in diverse environments;Fatty acid degradation;Chloroalkane and chloroalkene degradation;Tyrosine metabolism;Pyruvate metabolism;Drug metabolism - cytochrome P450;Glycolysis / Gluconeogenesis;Biosynthesis of secondary metabolites;Retinol metabolism
MAG114_gene2211	CPT_SW_3_k97_115600_ORF2197	MAG114	d__Bacteria;p__Chloroflexota;c__Anaerolineae;o__Anaerolineales;f__UBA4823;g__PFL25;s__Unclassified	2	532	531	K00001	adh	alcohol dehydrogenase [EC:1.1.1.1]	Metabolism of xenobiotics by cytochrome P450;Naphthalene degradation;Metabolic pathways;Degradation of aromatic compounds;Microbial metabolism in diverse environments;Fatty acid degradation;Chloroalkane and chloroalkene degradation;Tyrosine metabolism;Pyruvate metabolism;Drug metabolism - cytochrome P450;Glycolysis / Gluconeogenesis;Biosynthesis of secondary metabolites;Retinol metabolism
MAG114_gene2750	CPT_SW_3_k97_590364_ORF2730	MAG114	d__Bacteria;p__Chloroflexota;c__Anaerolineae;o__Anaerolineales;f__UBA4823;g__PFL25;s__Unclassified	1970	948	1023	K00001	adh	alcohol dehydrogenase [EC:1.1.1.1]	Metabolism of xenobiotics by cytochrome P450;Naphthalene degradation;Metabolic pathways;Degradation of aromatic compounds;Microbial metabolism in diverse environments;Fatty acid degradation;Chloroalkane and chloroalkene degradation;Tyrosine metabolism;Pyruvate metabolism;Drug metabolism - cytochrome P450;Glycolysis / Gluconeogenesis;Biosynthesis of secondary metabolites;Retinol metabolism
MAG115_gene0730	M3_1_3_k97_146178_ORF724	MAG115	d__Bacteria;p__Pseudomonadota;c__Gammaproteobacteria;o__UBA9214;f__UBA9214;g__Unclassified;s__Unclassified	2386	3579	1194	K00001	adh	alcohol dehydrogenase [EC:1.1.1.1]	Metabolism of xenobiotics by cytochrome P450;Naphthalene degradation;Metabolic pathways;Degradation of aromatic compounds;Microbial metabolism in diverse environments;Fatty acid degradation;Chloroalkane and chloroalkene degradation;Tyrosine metabolism;Pyruvate metabolism;Drug metabolism - cytochrome P450;Glycolysis / Gluconeogenesis;Biosynthesis of secondary metabolites;Retinol metabolism
MAG116_gene1607	CPT_SW_3_k97_230847_ORF1602	MAG116	d__Bacteria;p__Pseudomonadota;c__Alphaproteobacteria;o__Rhizobiales;f__Rhizobiaceae;g__BOKV01;s__Unclassified	2739	1594	1146	K00001	adh	alcohol dehydrogenase [EC:1.1.1.1]	Metabolism of xenobiotics by cytochrome P450;Naphthalene degradation;Metabolic pathways;Degradation of aromatic compounds;Microbial metabolism in diverse environments;Fatty acid degradation;Chloroalkane and chloroalkene degradation;Tyrosine metabolism;Pyruvate metabolism;Drug metabolism - cytochrome P450;Glycolysis / Gluconeogenesis;Biosynthesis of secondary metabolites;Retinol metabolism
MAG116_gene2686	CPT_SW_3_k97_236083_ORF2676	MAG116	d__Bacteria;p__Pseudomonadota;c__Alphaproteobacteria;o__Rhizobiales;f__Rhizobiaceae;g__BOKV01;s__Unclassified	1036	2073	1038	K00001	adh	alcohol dehydrogenase [EC:1.1.1.1]	Metabolism of xenobiotics by cytochrome P450;Naphthalene degradation;Metabolic pathways;Degradation of aromatic compounds;Microbial metabolism in diverse environments;Fatty acid degradation;Chloroalkane and chloroalkene degradation;Tyrosine metabolism;Pyruvate metabolism;Drug metabolism - cytochrome P450;Glycolysis / Gluconeogenesis;Biosynthesis of secondary metabolites;Retinol metabolism
MAG116_gene3134	CPT_SW_3_k97_901443_ORF3118	MAG116	d__Bacteria;p__Pseudomonadota;c__Alphaproteobacteria;o__Rhizobiales;f__Rhizobiaceae;g__BOKV01;s__Unclassified	2342	1185	1158	K00001	adh	alcohol dehydrogenase [EC:1.1.1.1]	Metabolism of xenobiotics by cytochrome P450;Naphthalene degradation;Metabolic pathways;Degradation of aromatic compounds;Microbial metabolism in diverse environments;Fatty acid degradation;Chloroalkane and chloroalkene degradation;Tyrosine metabolism;Pyruvate metabolism;Drug metabolism - cytochrome P450;Glycolysis / Gluconeogenesis;Biosynthesis of secondary metabolites;Retinol metabolism
MAG117_gene0573	DY_2_k97_788064_ORF565	MAG117	d__Bacteria;p__Actinomycetota;c__Actinomycetia;o__Nanopelagicales;f__CAIYMF01;g__Unclassified;s__Unclassified	2240	1221	1020	K00001	adh	alcohol dehydrogenase [EC:1.1.1.1]	Metabolism of xenobiotics by cytochrome P450;Naphthalene degradation;Metabolic pathways;Degradation of aromatic compounds;Microbial metabolism in diverse environments;Fatty acid degradation;Chloroalkane and chloroalkene degradation;Tyrosine metabolism;Pyruvate metabolism;Drug metabolism - cytochrome P450;Glycolysis / Gluconeogenesis;Biosynthesis of secondary metabolites;Retinol metabolism
MAG117_gene1699	DY_2_k97_455580_ORF1674	MAG117	d__Bacteria;p__Actinomycetota;c__Actinomycetia;o__Nanopelagicales;f__CAIYMF01;g__Unclassified;s__Unclassified	4249	3854	396	K00001	adh	alcohol dehydrogenase [EC:1.1.1.1]	Metabolism of xenobiotics by cytochrome P450;Naphthalene degradation;Metabolic pathways;Degradation of aromatic compounds;Microbial metabolism in diverse environments;Fatty acid degradation;Chloroalkane and chloroalkene degradation;Tyrosine metabolism;Pyruvate metabolism;Drug metabolism - cytochrome P450;Glycolysis / Gluconeogenesis;Biosynthesis of secondary metabolites;Retinol metabolism
MAG117_gene1880	DY_2_k97_444803_ORF1853	MAG117	d__Bacteria;p__Actinomycetota;c__Actinomycetia;o__Nanopelagicales;f__CAIYMF01;g__Unclassified;s__Unclassified	995	6	990	K00001	adh	alcohol dehydrogenase [EC:1.1.1.1]	Metabolism of xenobiotics by cytochrome P450;Naphthalene degradation;Metabolic pathways;Degradation of aromatic compounds;Microbial metabolism in diverse environments;Fatty acid degradation;Chloroalkane and chloroalkene degradation;Tyrosine metabolism;Pyruvate metabolism;Drug metabolism - cytochrome P450;Glycolysis / Gluconeogenesis;Biosynthesis of secondary metabolites;Retinol metabolism
MAG117_gene2008	DY_2_k97_450337_ORF1980	MAG117	d__Bacteria;p__Actinomycetota;c__Actinomycetia;o__Nanopelagicales;f__CAIYMF01;g__Unclassified;s__Unclassified	1225	2190	966	K00001	adh	alcohol dehydrogenase [EC:1.1.1.1]	Metabolism of xenobiotics by cytochrome P450;Naphthalene degradation;Metabolic pathways;Degradation of aromatic compounds;Microbial metabolism in diverse environments;Fatty acid degradation;Chloroalkane and chloroalkene degradation;Tyrosine metabolism;Pyruvate metabolism;Drug metabolism - cytochrome P450;Glycolysis / Gluconeogenesis;Biosynthesis of secondary metabolites;Retinol metabolism
MAG118_gene0415	M1_1_3_k97_91276_ORF411	MAG118	d__Bacteria;p__Pseudomonadota;c__Alphaproteobacteria;o__Rhizobiales;f__Aestuariivirgaceae;g__Anderseniella;s__Unclassified	509	1654	1146	K00001	adh	alcohol dehydrogenase [EC:1.1.1.1]	Metabolism of xenobiotics by cytochrome P450;Naphthalene degradation;Metabolic pathways;Degradation of aromatic compounds;Microbial metabolism in diverse environments;Fatty acid degradation;Chloroalkane and chloroalkene degradation;Tyrosine metabolism;Pyruvate metabolism;Drug metabolism - cytochrome P450;Glycolysis / Gluconeogenesis;Biosynthesis of secondary metabolites;Retinol metabolism
MAG118_gene1193	M1_1_3_k97_837996_ORF1182	MAG118	d__Bacteria;p__Pseudomonadota;c__Alphaproteobacteria;o__Rhizobiales;f__Aestuariivirgaceae;g__Anderseniella;s__Unclassified	3479	2499	981	K00001	adh	alcohol dehydrogenase [EC:1.1.1.1]	Metabolism of xenobiotics by cytochrome P450;Naphthalene degradation;Metabolic pathways;Degradation of aromatic compounds;Microbial metabolism in diverse environments;Fatty acid degradation;Chloroalkane and chloroalkene degradation;Tyrosine metabolism;Pyruvate metabolism;Drug metabolism - cytochrome P450;Glycolysis / Gluconeogenesis;Biosynthesis of secondary metabolites;Retinol metabolism
MAG118_gene1267	M1_1_3_k97_809856_ORF1255	MAG118	d__Bacteria;p__Pseudomonadota;c__Alphaproteobacteria;o__Rhizobiales;f__Aestuariivirgaceae;g__Anderseniella;s__Unclassified	2433	1345	1089	K00001	adh	alcohol dehydrogenase [EC:1.1.1.1]	Metabolism of xenobiotics by cytochrome P450;Naphthalene degradation;Metabolic pathways;Degradation of aromatic compounds;Microbial metabolism in diverse environments;Fatty acid degradation;Chloroalkane and chloroalkene degradation;Tyrosine metabolism;Pyruvate metabolism;Drug metabolism - cytochrome P450;Glycolysis / Gluconeogenesis;Biosynthesis of secondary metabolites;Retinol metabolism
MAG119_gene2190	M3_2_1_k97_658715_ORF2167	MAG119	d__Bacteria;p__Bacteroidota;c__Bacteroidia;o__Flavobacteriales;f__Flavobacteriaceae;g__Lutimonas;s__Unclassified	3	557	555	K00001	adh	alcohol dehydrogenase [EC:1.1.1.1]	Metabolism of xenobiotics by cytochrome P450;Naphthalene degradation;Metabolic pathways;Degradation of aromatic compounds;Microbial metabolism in diverse environments;Fatty acid degradation;Chloroalkane and chloroalkene degradation;Tyrosine metabolism;Pyruvate metabolism;Drug metabolism - cytochrome P450;Glycolysis / Gluconeogenesis;Biosynthesis of secondary metabolites;Retinol metabolism
MAG12_gene1491	DY_3_k97_186895_ORF1483	MAG12	d__Bacteria;p__Actinomycetota;c__Acidimicrobiia;o__UBA5794;f__ZC4RG35;g__Unclassified;s__Unclassified	2901	1813	1089	K00001	adh	alcohol dehydrogenase [EC:1.1.1.1]	Metabolism of xenobiotics by cytochrome P450;Naphthalene degradation;Metabolic pathways;Degradation of aromatic compounds;Microbial metabolism in diverse environments;Fatty acid degradation;Chloroalkane and chloroalkene degradation;Tyrosine metabolism;Pyruvate metabolism;Drug metabolism - cytochrome P450;Glycolysis / Gluconeogenesis;Biosynthesis of secondary metabolites;Retinol metabolism
MAG12_gene1589	DY_3_k97_183515_ORF1581	MAG12	d__Bacteria;p__Actinomycetota;c__Acidimicrobiia;o__UBA5794;f__ZC4RG35;g__Unclassified;s__Unclassified	3445	2417	1029	K00001	adh	alcohol dehydrogenase [EC:1.1.1.1]	Metabolism of xenobiotics by cytochrome P450;Naphthalene degradation;Metabolic pathways;Degradation of aromatic compounds;Microbial metabolism in diverse environments;Fatty acid degradation;Chloroalkane and chloroalkene degradation;Tyrosine metabolism;Pyruvate metabolism;Drug metabolism - cytochrome P450;Glycolysis / Gluconeogenesis;Biosynthesis of secondary metabolites;Retinol metabolism
MAG12_gene2245	DY_3_k97_850087_ORF2231	MAG12	d__Bacteria;p__Actinomycetota;c__Acidimicrobiia;o__UBA5794;f__ZC4RG35;g__Unclassified;s__Unclassified	2	634	633	K00001	adh	alcohol dehydrogenase [EC:1.1.1.1]	Metabolism of xenobiotics by cytochrome P450;Naphthalene degradation;Metabolic pathways;Degradation of aromatic compounds;Microbial metabolism in diverse environments;Fatty acid degradation;Chloroalkane and chloroalkene degradation;Tyrosine metabolism;Pyruvate metabolism;Drug metabolism - cytochrome P450;Glycolysis / Gluconeogenesis;Biosynthesis of secondary metabolites;Retinol metabolism
MAG120_gene0399	M1_1_3_k97_603842_ORF394	MAG120	d__Bacteria;p__Pseudomonadota;c__Alphaproteobacteria;o__Rhizobiales;f__Methyloligellaceae;g__Methyloceanibacter;s__Unclassified	3	479	477	K00001	adh	alcohol dehydrogenase [EC:1.1.1.1]	Metabolism of xenobiotics by cytochrome P450;Naphthalene degradation;Metabolic pathways;Degradation of aromatic compounds;Microbial metabolism in diverse environments;Fatty acid degradation;Chloroalkane and chloroalkene degradation;Tyrosine metabolism;Pyruvate metabolism;Drug metabolism - cytochrome P450;Glycolysis / Gluconeogenesis;Biosynthesis of secondary metabolites;Retinol metabolism
MAG120_gene3411	M1_1_3_k97_73152_ORF3363	MAG120	d__Bacteria;p__Pseudomonadota;c__Alphaproteobacteria;o__Rhizobiales;f__Methyloligellaceae;g__Methyloceanibacter;s__Unclassified	1953	952	1002	K00001	adh	alcohol dehydrogenase [EC:1.1.1.1]	Metabolism of xenobiotics by cytochrome P450;Naphthalene degradation;Metabolic pathways;Degradation of aromatic compounds;Microbial metabolism in diverse environments;Fatty acid degradation;Chloroalkane and chloroalkene degradation;Tyrosine metabolism;Pyruvate metabolism;Drug metabolism - cytochrome P450;Glycolysis / Gluconeogenesis;Biosynthesis of secondary metabolites;Retinol metabolism
MAG122_gene0290	M2_1_1_k97_1699607_ORF286	MAG122	d__Bacteria;p__Actinomycetota;c__Actinomycetia;o__Actinomycetales;f__Dermatophilaceae;g__Phycicoccus;s__Unclassified	6079	7140	1062	K00001	adh	alcohol dehydrogenase [EC:1.1.1.1]	Metabolism of xenobiotics by cytochrome P450;Naphthalene degradation;Metabolic pathways;Degradation of aromatic compounds;Microbial metabolism in diverse environments;Fatty acid degradation;Chloroalkane and chloroalkene degradation;Tyrosine metabolism;Pyruvate metabolism;Drug metabolism - cytochrome P450;Glycolysis / Gluconeogenesis;Biosynthesis of secondary metabolites;Retinol metabolism
MAG122_gene1921	M2_1_1_k97_1228064_ORF1908	MAG122	d__Bacteria;p__Actinomycetota;c__Actinomycetia;o__Actinomycetales;f__Dermatophilaceae;g__Phycicoccus;s__Unclassified	158	3	156	K00001	adh	alcohol dehydrogenase [EC:1.1.1.1]	Metabolism of xenobiotics by cytochrome P450;Naphthalene degradation;Metabolic pathways;Degradation of aromatic compounds;Microbial metabolism in diverse environments;Fatty acid degradation;Chloroalkane and chloroalkene degradation;Tyrosine metabolism;Pyruvate metabolism;Drug metabolism - cytochrome P450;Glycolysis / Gluconeogenesis;Biosynthesis of secondary metabolites;Retinol metabolism
MAG123_gene2240	FG_SC_1_k97_354129_ORF2213	MAG123	d__Bacteria;p__Actinomycetota;c__Acidimicrobiia;o__UBA5794;f__ZC4RG35;g__SZUA-217;s__Unclassified	1595	585	1011	K00001	adh	alcohol dehydrogenase [EC:1.1.1.1]	Metabolism of xenobiotics by cytochrome P450;Naphthalene degradation;Metabolic pathways;Degradation of aromatic compounds;Microbial metabolism in diverse environments;Fatty acid degradation;Chloroalkane and chloroalkene degradation;Tyrosine metabolism;Pyruvate metabolism;Drug metabolism - cytochrome P450;Glycolysis / Gluconeogenesis;Biosynthesis of secondary metabolites;Retinol metabolism
MAG124_gene0875	DY_1_k97_284004_ORF871	MAG124	d__Bacteria;p__Chloroflexota;c__Anaerolineae;o__Anaerolineales;f__UBA4823;g__PFL25;s__PFL25 sp020349245	4106	3156	951	K00001	adh	alcohol dehydrogenase [EC:1.1.1.1]	Metabolism of xenobiotics by cytochrome P450;Naphthalene degradation;Metabolic pathways;Degradation of aromatic compounds;Microbial metabolism in diverse environments;Fatty acid degradation;Chloroalkane and chloroalkene degradation;Tyrosine metabolism;Pyruvate metabolism;Drug metabolism - cytochrome P450;Glycolysis / Gluconeogenesis;Biosynthesis of secondary metabolites;Retinol metabolism
MAG124_gene0959	DY_1_k97_244000_ORF955	MAG124	d__Bacteria;p__Chloroflexota;c__Anaerolineae;o__Anaerolineales;f__UBA4823;g__PFL25;s__PFL25 sp020349245	1574	2596	1023	K00001	adh	alcohol dehydrogenase [EC:1.1.1.1]	Metabolism of xenobiotics by cytochrome P450;Naphthalene degradation;Metabolic pathways;Degradation of aromatic compounds;Microbial metabolism in diverse environments;Fatty acid degradation;Chloroalkane and chloroalkene degradation;Tyrosine metabolism;Pyruvate metabolism;Drug metabolism - cytochrome P450;Glycolysis / Gluconeogenesis;Biosynthesis of secondary metabolites;Retinol metabolism
MAG124_gene1085	DY_1_k97_754302_ORF1079	MAG124	d__Bacteria;p__Chloroflexota;c__Anaerolineae;o__Anaerolineales;f__UBA4823;g__PFL25;s__PFL25 sp020349245	3610	2618	993	K00001	adh	alcohol dehydrogenase [EC:1.1.1.1]	Metabolism of xenobiotics by cytochrome P450;Naphthalene degradation;Metabolic pathways;Degradation of aromatic compounds;Microbial metabolism in diverse environments;Fatty acid degradation;Chloroalkane and chloroalkene degradation;Tyrosine metabolism;Pyruvate metabolism;Drug metabolism - cytochrome P450;Glycolysis / Gluconeogenesis;Biosynthesis of secondary metabolites;Retinol metabolism
MAG124_gene1906	DY_1_k97_917833_ORF1892	MAG124	d__Bacteria;p__Chloroflexota;c__Anaerolineae;o__Anaerolineales;f__UBA4823;g__PFL25;s__PFL25 sp020349245	1508	534	975	K00001	adh	alcohol dehydrogenase [EC:1.1.1.1]	Metabolism of xenobiotics by cytochrome P450;Naphthalene degradation;Metabolic pathways;Degradation of aromatic compounds;Microbial metabolism in diverse environments;Fatty acid degradation;Chloroalkane and chloroalkene degradation;Tyrosine metabolism;Pyruvate metabolism;Drug metabolism - cytochrome P450;Glycolysis / Gluconeogenesis;Biosynthesis of secondary metabolites;Retinol metabolism
MAG124_gene2492	DY_1_k97_639830_ORF2473	MAG124	d__Bacteria;p__Chloroflexota;c__Anaerolineae;o__Anaerolineales;f__UBA4823;g__PFL25;s__PFL25 sp020349245	3253	2285	969	K00001	adh	alcohol dehydrogenase [EC:1.1.1.1]	Metabolism of xenobiotics by cytochrome P450;Naphthalene degradation;Metabolic pathways;Degradation of aromatic compounds;Microbial metabolism in diverse environments;Fatty acid degradation;Chloroalkane and chloroalkene degradation;Tyrosine metabolism;Pyruvate metabolism;Drug metabolism - cytochrome P450;Glycolysis / Gluconeogenesis;Biosynthesis of secondary metabolites;Retinol metabolism
MAG124_gene2709	DY_1_k97_801965_ORF2689	MAG124	d__Bacteria;p__Chloroflexota;c__Anaerolineae;o__Anaerolineales;f__UBA4823;g__PFL25;s__PFL25 sp020349245	3203	2751	453	K00001	adh	alcohol dehydrogenase [EC:1.1.1.1]	Metabolism of xenobiotics by cytochrome P450;Naphthalene degradation;Metabolic pathways;Degradation of aromatic compounds;Microbial metabolism in diverse environments;Fatty acid degradation;Chloroalkane and chloroalkene degradation;Tyrosine metabolism;Pyruvate metabolism;Drug metabolism - cytochrome P450;Glycolysis / Gluconeogenesis;Biosynthesis of secondary metabolites;Retinol metabolism
MAG124_gene2930	DY_1_k97_1039207_ORF2907	MAG124	d__Bacteria;p__Chloroflexota;c__Anaerolineae;o__Anaerolineales;f__UBA4823;g__PFL25;s__PFL25 sp020349245	1672	668	1005	K00001	adh	alcohol dehydrogenase [EC:1.1.1.1]	Metabolism of xenobiotics by cytochrome P450;Naphthalene degradation;Metabolic pathways;Degradation of aromatic compounds;Microbial metabolism in diverse environments;Fatty acid degradation;Chloroalkane and chloroalkene degradation;Tyrosine metabolism;Pyruvate metabolism;Drug metabolism - cytochrome P450;Glycolysis / Gluconeogenesis;Biosynthesis of secondary metabolites;Retinol metabolism
MAG124_gene3082	DY_1_k97_579272_ORF3058	MAG124	d__Bacteria;p__Chloroflexota;c__Anaerolineae;o__Anaerolineales;f__UBA4823;g__PFL25;s__PFL25 sp020349245	1336	2304	969	K00001	adh	alcohol dehydrogenase [EC:1.1.1.1]	Metabolism of xenobiotics by cytochrome P450;Naphthalene degradation;Metabolic pathways;Degradation of aromatic compounds;Microbial metabolism in diverse environments;Fatty acid degradation;Chloroalkane and chloroalkene degradation;Tyrosine metabolism;Pyruvate metabolism;Drug metabolism - cytochrome P450;Glycolysis / Gluconeogenesis;Biosynthesis of secondary metabolites;Retinol metabolism
MAG125_gene2045	M2_1_2_k97_266837_ORF2035	MAG125	d__Bacteria;p__Pseudomonadota;c__Gammaproteobacteria;o__Woeseiales;f__Woeseiaceae;g__UBA1847;s__Unclassified	1	561	561	K00001	adh	alcohol dehydrogenase [EC:1.1.1.1]	Metabolism of xenobiotics by cytochrome P450;Naphthalene degradation;Metabolic pathways;Degradation of aromatic compounds;Microbial metabolism in diverse environments;Fatty acid degradation;Chloroalkane and chloroalkene degradation;Tyrosine metabolism;Pyruvate metabolism;Drug metabolism - cytochrome P450;Glycolysis / Gluconeogenesis;Biosynthesis of secondary metabolites;Retinol metabolism
MAG126_gene0812	M2_1_2_k97_1612929_ORF803	MAG126	d__Bacteria;p__Pseudomonadota;c__Alphaproteobacteria;o__Rhizobiales;f__Aestuariivirgaceae;g__Anderseniella;s__Unclassified	2103	916	1188	K00001	adh	alcohol dehydrogenase [EC:1.1.1.1]	Metabolism of xenobiotics by cytochrome P450;Naphthalene degradation;Metabolic pathways;Degradation of aromatic compounds;Microbial metabolism in diverse environments;Fatty acid degradation;Chloroalkane and chloroalkene degradation;Tyrosine metabolism;Pyruvate metabolism;Drug metabolism - cytochrome P450;Glycolysis / Gluconeogenesis;Biosynthesis of secondary metabolites;Retinol metabolism
MAG126_gene1761	M2_1_2_k97_224837_ORF1745	MAG126	d__Bacteria;p__Pseudomonadota;c__Alphaproteobacteria;o__Rhizobiales;f__Aestuariivirgaceae;g__Anderseniella;s__Unclassified	2	967	966	K00001	adh	alcohol dehydrogenase [EC:1.1.1.1]	Metabolism of xenobiotics by cytochrome P450;Naphthalene degradation;Metabolic pathways;Degradation of aromatic compounds;Microbial metabolism in diverse environments;Fatty acid degradation;Chloroalkane and chloroalkene degradation;Tyrosine metabolism;Pyruvate metabolism;Drug metabolism - cytochrome P450;Glycolysis / Gluconeogenesis;Biosynthesis of secondary metabolites;Retinol metabolism
MAG126_gene2207	M2_1_2_k97_1353360_ORF2190	MAG126	d__Bacteria;p__Pseudomonadota;c__Alphaproteobacteria;o__Rhizobiales;f__Aestuariivirgaceae;g__Anderseniella;s__Unclassified	125	3	123	K00001	adh	alcohol dehydrogenase [EC:1.1.1.1]	Metabolism of xenobiotics by cytochrome P450;Naphthalene degradation;Metabolic pathways;Degradation of aromatic compounds;Microbial metabolism in diverse environments;Fatty acid degradation;Chloroalkane and chloroalkene degradation;Tyrosine metabolism;Pyruvate metabolism;Drug metabolism - cytochrome P450;Glycolysis / Gluconeogenesis;Biosynthesis of secondary metabolites;Retinol metabolism
MAG127_gene0434	M3_2_3_k97_472054_ORF426	MAG127	d__Bacteria;p__Pseudomonadota;c__Gammaproteobacteria;o__Steroidobacterales;f__Steroidobacteraceae;g__Unclassified;s__Unclassified	3	323	321	K00001	adh	alcohol dehydrogenase [EC:1.1.1.1]	Metabolism of xenobiotics by cytochrome P450;Naphthalene degradation;Metabolic pathways;Degradation of aromatic compounds;Microbial metabolism in diverse environments;Fatty acid degradation;Chloroalkane and chloroalkene degradation;Tyrosine metabolism;Pyruvate metabolism;Drug metabolism - cytochrome P450;Glycolysis / Gluconeogenesis;Biosynthesis of secondary metabolites;Retinol metabolism
MAG127_gene2591	M3_2_3_k97_1331181_ORF2562	MAG127	d__Bacteria;p__Pseudomonadota;c__Gammaproteobacteria;o__Steroidobacterales;f__Steroidobacteraceae;g__Unclassified;s__Unclassified	731	1669	939	K00001	adh	alcohol dehydrogenase [EC:1.1.1.1]	Metabolism of xenobiotics by cytochrome P450;Naphthalene degradation;Metabolic pathways;Degradation of aromatic compounds;Microbial metabolism in diverse environments;Fatty acid degradation;Chloroalkane and chloroalkene degradation;Tyrosine metabolism;Pyruvate metabolism;Drug metabolism - cytochrome P450;Glycolysis / Gluconeogenesis;Biosynthesis of secondary metabolites;Retinol metabolism
MAG128_gene1094	FG_WR_2_k97_325988_ORF1083	MAG128	d__Bacteria;p__Bacteroidota;c__Bacteroidia;o__Bacteroidales;f__VadinHA17;g__SR-FBR-E99;s__SR-FBR-E99 sp006227095	2090	882	1209	K00001	adh	alcohol dehydrogenase [EC:1.1.1.1]	Metabolism of xenobiotics by cytochrome P450;Naphthalene degradation;Metabolic pathways;Degradation of aromatic compounds;Microbial metabolism in diverse environments;Fatty acid degradation;Chloroalkane and chloroalkene degradation;Tyrosine metabolism;Pyruvate metabolism;Drug metabolism - cytochrome P450;Glycolysis / Gluconeogenesis;Biosynthesis of secondary metabolites;Retinol metabolism
MAG128_gene2490	FG_WR_2_k97_950749_ORF2469	MAG128	d__Bacteria;p__Bacteroidota;c__Bacteroidia;o__Bacteroidales;f__VadinHA17;g__SR-FBR-E99;s__SR-FBR-E99 sp006227095	1440	823	618	K00001	adh	alcohol dehydrogenase [EC:1.1.1.1]	Metabolism of xenobiotics by cytochrome P450;Naphthalene degradation;Metabolic pathways;Degradation of aromatic compounds;Microbial metabolism in diverse environments;Fatty acid degradation;Chloroalkane and chloroalkene degradation;Tyrosine metabolism;Pyruvate metabolism;Drug metabolism - cytochrome P450;Glycolysis / Gluconeogenesis;Biosynthesis of secondary metabolites;Retinol metabolism
MAG13_gene3046	DY_1_k97_634838_ORF3013	MAG13	d__Bacteria;p__Pseudomonadota;c__Gammaproteobacteria;o__Burkholderiales;f__Burkholderiaceae_B;g__G020354665;s__G020354665 sp020354665	1060	32	1029	K00001	adh	alcohol dehydrogenase [EC:1.1.1.1]	Metabolism of xenobiotics by cytochrome P450;Naphthalene degradation;Metabolic pathways;Degradation of aromatic compounds;Microbial metabolism in diverse environments;Fatty acid degradation;Chloroalkane and chloroalkene degradation;Tyrosine metabolism;Pyruvate metabolism;Drug metabolism - cytochrome P450;Glycolysis / Gluconeogenesis;Biosynthesis of secondary metabolites;Retinol metabolism
MAG13_gene3442	DY_1_k97_812299_ORF3407	MAG13	d__Bacteria;p__Pseudomonadota;c__Gammaproteobacteria;o__Burkholderiales;f__Burkholderiaceae_B;g__G020354665;s__G020354665 sp020354665	3	542	540	K00001	adh	alcohol dehydrogenase [EC:1.1.1.1]	Metabolism of xenobiotics by cytochrome P450;Naphthalene degradation;Metabolic pathways;Degradation of aromatic compounds;Microbial metabolism in diverse environments;Fatty acid degradation;Chloroalkane and chloroalkene degradation;Tyrosine metabolism;Pyruvate metabolism;Drug metabolism - cytochrome P450;Glycolysis / Gluconeogenesis;Biosynthesis of secondary metabolites;Retinol metabolism
MAG130_gene4275	FG_SC_1_k97_434648_ORF4254	MAG130	d__Bacteria;p__Planctomycetota;c__Planctomycetia;o__Pirellulales;f__Pirellulaceae;g__JAGQPK01;s__Unclassified	439	1443	1005	K00001	adh	alcohol dehydrogenase [EC:1.1.1.1]	Metabolism of xenobiotics by cytochrome P450;Naphthalene degradation;Metabolic pathways;Degradation of aromatic compounds;Microbial metabolism in diverse environments;Fatty acid degradation;Chloroalkane and chloroalkene degradation;Tyrosine metabolism;Pyruvate metabolism;Drug metabolism - cytochrome P450;Glycolysis / Gluconeogenesis;Biosynthesis of secondary metabolites;Retinol metabolism
MAG131_gene1287	FG_SC_1_k97_258406_ORF1285	MAG131	d__Bacteria;p__Bacteroidota;c__Bacteroidia;o__Flavobacteriales;f__Flavobacteriaceae;g__Robiginitalea;s__Unclassified	891	1	891	K00001	adh	alcohol dehydrogenase [EC:1.1.1.1]	Metabolism of xenobiotics by cytochrome P450;Naphthalene degradation;Metabolic pathways;Degradation of aromatic compounds;Microbial metabolism in diverse environments;Fatty acid degradation;Chloroalkane and chloroalkene degradation;Tyrosine metabolism;Pyruvate metabolism;Drug metabolism - cytochrome P450;Glycolysis / Gluconeogenesis;Biosynthesis of secondary metabolites;Retinol metabolism
MAG132_gene1787	CPT_MZ_2_k97_26501_ORF1775	MAG132	d__Bacteria;p__Chloroflexota;c__Anaerolineae;o__Anaerolineales;f__UBA4823;g__DSOS01;s__Unclassified	2226	1186	1041	K00001	adh	alcohol dehydrogenase [EC:1.1.1.1]	Metabolism of xenobiotics by cytochrome P450;Naphthalene degradation;Metabolic pathways;Degradation of aromatic compounds;Microbial metabolism in diverse environments;Fatty acid degradation;Chloroalkane and chloroalkene degradation;Tyrosine metabolism;Pyruvate metabolism;Drug metabolism - cytochrome P450;Glycolysis / Gluconeogenesis;Biosynthesis of secondary metabolites;Retinol metabolism
MAG132_gene3018	CPT_MZ_2_k97_187757_ORF3002	MAG132	d__Bacteria;p__Chloroflexota;c__Anaerolineae;o__Anaerolineales;f__UBA4823;g__DSOS01;s__Unclassified	17	418	402	K00001	adh	alcohol dehydrogenase [EC:1.1.1.1]	Metabolism of xenobiotics by cytochrome P450;Naphthalene degradation;Metabolic pathways;Degradation of aromatic compounds;Microbial metabolism in diverse environments;Fatty acid degradation;Chloroalkane and chloroalkene degradation;Tyrosine metabolism;Pyruvate metabolism;Drug metabolism - cytochrome P450;Glycolysis / Gluconeogenesis;Biosynthesis of secondary metabolites;Retinol metabolism
MAG132_gene4724	CPT_MZ_2_k97_1136726_ORF4688	MAG132	d__Bacteria;p__Chloroflexota;c__Anaerolineae;o__Anaerolineales;f__UBA4823;g__DSOS01;s__Unclassified	2093	1167	927	K00001	adh	alcohol dehydrogenase [EC:1.1.1.1]	Metabolism of xenobiotics by cytochrome P450;Naphthalene degradation;Metabolic pathways;Degradation of aromatic compounds;Microbial metabolism in diverse environments;Fatty acid degradation;Chloroalkane and chloroalkene degradation;Tyrosine metabolism;Pyruvate metabolism;Drug metabolism - cytochrome P450;Glycolysis / Gluconeogenesis;Biosynthesis of secondary metabolites;Retinol metabolism
MAG133_gene0829	M2_2_2_k97_845025_ORF821	MAG133	d__Bacteria;p__Pseudomonadota;c__Alphaproteobacteria;o__Rhizobiales;f__Aestuariivirgaceae;g__Anderseniella;s__Unclassified	160	1347	1188	K00001	adh	alcohol dehydrogenase [EC:1.1.1.1]	Metabolism of xenobiotics by cytochrome P450;Naphthalene degradation;Metabolic pathways;Degradation of aromatic compounds;Microbial metabolism in diverse environments;Fatty acid degradation;Chloroalkane and chloroalkene degradation;Tyrosine metabolism;Pyruvate metabolism;Drug metabolism - cytochrome P450;Glycolysis / Gluconeogenesis;Biosynthesis of secondary metabolites;Retinol metabolism
MAG134_gene0419	CPT_LW_1_k97_706404_ORF414	MAG134	d__Bacteria;p__Actinomycetota;c__Actinomycetia;o__Mycobacteriales;f__Mycobacteriaceae;g__Mycobacterium;s__Unclassified	3046	2009	1038	K00001	adh	alcohol dehydrogenase [EC:1.1.1.1]	Metabolism of xenobiotics by cytochrome P450;Naphthalene degradation;Metabolic pathways;Degradation of aromatic compounds;Microbial metabolism in diverse environments;Fatty acid degradation;Chloroalkane and chloroalkene degradation;Tyrosine metabolism;Pyruvate metabolism;Drug metabolism - cytochrome P450;Glycolysis / Gluconeogenesis;Biosynthesis of secondary metabolites;Retinol metabolism
MAG134_gene1381	CPT_LW_1_k97_434589_ORF1367	MAG134	d__Bacteria;p__Actinomycetota;c__Actinomycetia;o__Mycobacteriales;f__Mycobacteriaceae;g__Mycobacterium;s__Unclassified	1099	2043	945	K00001	adh	alcohol dehydrogenase [EC:1.1.1.1]	Metabolism of xenobiotics by cytochrome P450;Naphthalene degradation;Metabolic pathways;Degradation of aromatic compounds;Microbial metabolism in diverse environments;Fatty acid degradation;Chloroalkane and chloroalkene degradation;Tyrosine metabolism;Pyruvate metabolism;Drug metabolism - cytochrome P450;Glycolysis / Gluconeogenesis;Biosynthesis of secondary metabolites;Retinol metabolism
MAG136_gene1104	FG_SC_2_k97_607027_ORF1099	MAG136	d__Bacteria;p__Actinomycetota;c__Acidimicrobiia;o__Acidimicrobiales;f__Ilumatobacteraceae;g__Ilumatobacter;s__Unclassified	4215	4472	258	K00001	adh	alcohol dehydrogenase [EC:1.1.1.1]	Metabolism of xenobiotics by cytochrome P450;Naphthalene degradation;Metabolic pathways;Degradation of aromatic compounds;Microbial metabolism in diverse environments;Fatty acid degradation;Chloroalkane and chloroalkene degradation;Tyrosine metabolism;Pyruvate metabolism;Drug metabolism - cytochrome P450;Glycolysis / Gluconeogenesis;Biosynthesis of secondary metabolites;Retinol metabolism
MAG136_gene1914	FG_SC_2_k97_790529_ORF1904	MAG136	d__Bacteria;p__Actinomycetota;c__Acidimicrobiia;o__Acidimicrobiales;f__Ilumatobacteraceae;g__Ilumatobacter;s__Unclassified	1394	2362	969	K00001	adh	alcohol dehydrogenase [EC:1.1.1.1]	Metabolism of xenobiotics by cytochrome P450;Naphthalene degradation;Metabolic pathways;Degradation of aromatic compounds;Microbial metabolism in diverse environments;Fatty acid degradation;Chloroalkane and chloroalkene degradation;Tyrosine metabolism;Pyruvate metabolism;Drug metabolism - cytochrome P450;Glycolysis / Gluconeogenesis;Biosynthesis of secondary metabolites;Retinol metabolism
MAG137_gene1881	M2_1_3_k97_713295_ORF1873	MAG137	d__Bacteria;p__Pseudomonadota;c__Gammaproteobacteria;o__Woeseiales;f__Woeseiaceae;g__UBA1847;s__Unclassified	2361	1861	501	K00001	adh	alcohol dehydrogenase [EC:1.1.1.1]	Metabolism of xenobiotics by cytochrome P450;Naphthalene degradation;Metabolic pathways;Degradation of aromatic compounds;Microbial metabolism in diverse environments;Fatty acid degradation;Chloroalkane and chloroalkene degradation;Tyrosine metabolism;Pyruvate metabolism;Drug metabolism - cytochrome P450;Glycolysis / Gluconeogenesis;Biosynthesis of secondary metabolites;Retinol metabolism
MAG14_gene2049	M3_1_2_k97_34261_ORF2032	MAG14	d__Bacteria;p__Pseudomonadota;c__Gammaproteobacteria;o__Steroidobacterales;f__Steroidobacteraceae;g__Unclassified;s__Unclassified	104	3	102	K00001	adh	alcohol dehydrogenase [EC:1.1.1.1]	Metabolism of xenobiotics by cytochrome P450;Naphthalene degradation;Metabolic pathways;Degradation of aromatic compounds;Microbial metabolism in diverse environments;Fatty acid degradation;Chloroalkane and chloroalkene degradation;Tyrosine metabolism;Pyruvate metabolism;Drug metabolism - cytochrome P450;Glycolysis / Gluconeogenesis;Biosynthesis of secondary metabolites;Retinol metabolism
MAG140_gene0209	DY_3_k97_459517_ORF208	MAG140	d__Bacteria;p__Chloroflexota;c__Anaerolineae;o__Anaerolineales;f__UBA4823;g__PFL25;s__Unclassified	11695	12714	1020	K00001	adh	alcohol dehydrogenase [EC:1.1.1.1]	Metabolism of xenobiotics by cytochrome P450;Naphthalene degradation;Metabolic pathways;Degradation of aromatic compounds;Microbial metabolism in diverse environments;Fatty acid degradation;Chloroalkane and chloroalkene degradation;Tyrosine metabolism;Pyruvate metabolism;Drug metabolism - cytochrome P450;Glycolysis / Gluconeogenesis;Biosynthesis of secondary metabolites;Retinol metabolism
MAG140_gene0341	DY_3_k97_63525_ORF339	MAG140	d__Bacteria;p__Chloroflexota;c__Anaerolineae;o__Anaerolineales;f__UBA4823;g__PFL25;s__Unclassified	660	1715	1056	K00001	adh	alcohol dehydrogenase [EC:1.1.1.1]	Metabolism of xenobiotics by cytochrome P450;Naphthalene degradation;Metabolic pathways;Degradation of aromatic compounds;Microbial metabolism in diverse environments;Fatty acid degradation;Chloroalkane and chloroalkene degradation;Tyrosine metabolism;Pyruvate metabolism;Drug metabolism - cytochrome P450;Glycolysis / Gluconeogenesis;Biosynthesis of secondary metabolites;Retinol metabolism
MAG140_gene1831	DY_3_k97_600885_ORF1815	MAG140	d__Bacteria;p__Chloroflexota;c__Anaerolineae;o__Anaerolineales;f__UBA4823;g__PFL25;s__Unclassified	4211	5155	945	K00001	adh	alcohol dehydrogenase [EC:1.1.1.1]	Metabolism of xenobiotics by cytochrome P450;Naphthalene degradation;Metabolic pathways;Degradation of aromatic compounds;Microbial metabolism in diverse environments;Fatty acid degradation;Chloroalkane and chloroalkene degradation;Tyrosine metabolism;Pyruvate metabolism;Drug metabolism - cytochrome P450;Glycolysis / Gluconeogenesis;Biosynthesis of secondary metabolites;Retinol metabolism
MAG140_gene2176	DY_3_k97_18382_ORF2159	MAG140	d__Bacteria;p__Chloroflexota;c__Anaerolineae;o__Anaerolineales;f__UBA4823;g__PFL25;s__Unclassified	2199	1210	990	K00001	adh	alcohol dehydrogenase [EC:1.1.1.1]	Metabolism of xenobiotics by cytochrome P450;Naphthalene degradation;Metabolic pathways;Degradation of aromatic compounds;Microbial metabolism in diverse environments;Fatty acid degradation;Chloroalkane and chloroalkene degradation;Tyrosine metabolism;Pyruvate metabolism;Drug metabolism - cytochrome P450;Glycolysis / Gluconeogenesis;Biosynthesis of secondary metabolites;Retinol metabolism
MAG140_gene2505	DY_3_k97_401401_ORF2485	MAG140	d__Bacteria;p__Chloroflexota;c__Anaerolineae;o__Anaerolineales;f__UBA4823;g__PFL25;s__Unclassified	890	3	888	K00001	adh	alcohol dehydrogenase [EC:1.1.1.1]	Metabolism of xenobiotics by cytochrome P450;Naphthalene degradation;Metabolic pathways;Degradation of aromatic compounds;Microbial metabolism in diverse environments;Fatty acid degradation;Chloroalkane and chloroalkene degradation;Tyrosine metabolism;Pyruvate metabolism;Drug metabolism - cytochrome P450;Glycolysis / Gluconeogenesis;Biosynthesis of secondary metabolites;Retinol metabolism
MAG140_gene2937	DY_3_k97_481830_ORF2910	MAG140	d__Bacteria;p__Chloroflexota;c__Anaerolineae;o__Anaerolineales;f__UBA4823;g__PFL25;s__Unclassified	2528	1488	1041	K00001	adh	alcohol dehydrogenase [EC:1.1.1.1]	Metabolism of xenobiotics by cytochrome P450;Naphthalene degradation;Metabolic pathways;Degradation of aromatic compounds;Microbial metabolism in diverse environments;Fatty acid degradation;Chloroalkane and chloroalkene degradation;Tyrosine metabolism;Pyruvate metabolism;Drug metabolism - cytochrome P450;Glycolysis / Gluconeogenesis;Biosynthesis of secondary metabolites;Retinol metabolism
MAG140_gene3266	DY_3_k97_510545_ORF3238	MAG140	d__Bacteria;p__Chloroflexota;c__Anaerolineae;o__Anaerolineales;f__UBA4823;g__PFL25;s__Unclassified	745	2	744	K00001	adh	alcohol dehydrogenase [EC:1.1.1.1]	Metabolism of xenobiotics by cytochrome P450;Naphthalene degradation;Metabolic pathways;Degradation of aromatic compounds;Microbial metabolism in diverse environments;Fatty acid degradation;Chloroalkane and chloroalkene degradation;Tyrosine metabolism;Pyruvate metabolism;Drug metabolism - cytochrome P450;Glycolysis / Gluconeogenesis;Biosynthesis of secondary metabolites;Retinol metabolism
MAG140_gene3499	DY_3_k97_254097_ORF3468	MAG140	d__Bacteria;p__Chloroflexota;c__Anaerolineae;o__Anaerolineales;f__UBA4823;g__PFL25;s__Unclassified	1547	2176	630	K00001	adh	alcohol dehydrogenase [EC:1.1.1.1]	Metabolism of xenobiotics by cytochrome P450;Naphthalene degradation;Metabolic pathways;Degradation of aromatic compounds;Microbial metabolism in diverse environments;Fatty acid degradation;Chloroalkane and chloroalkene degradation;Tyrosine metabolism;Pyruvate metabolism;Drug metabolism - cytochrome P450;Glycolysis / Gluconeogenesis;Biosynthesis of secondary metabolites;Retinol metabolism
MAG141_gene0486	DY_1_k97_287266_ORF479	MAG141	d__Bacteria;p__Actinomycetota;c__Acidimicrobiia;o__UBA5794;f__ZC4RG35;g__Unclassified;s__Unclassified	1189	2217	1029	K00001	adh	alcohol dehydrogenase [EC:1.1.1.1]	Metabolism of xenobiotics by cytochrome P450;Naphthalene degradation;Metabolic pathways;Degradation of aromatic compounds;Microbial metabolism in diverse environments;Fatty acid degradation;Chloroalkane and chloroalkene degradation;Tyrosine metabolism;Pyruvate metabolism;Drug metabolism - cytochrome P450;Glycolysis / Gluconeogenesis;Biosynthesis of secondary metabolites;Retinol metabolism
MAG141_gene1526	DY_1_k97_575850_ORF1511	MAG141	d__Bacteria;p__Actinomycetota;c__Acidimicrobiia;o__UBA5794;f__ZC4RG35;g__Unclassified;s__Unclassified	3	557	555	K00001	adh	alcohol dehydrogenase [EC:1.1.1.1]	Metabolism of xenobiotics by cytochrome P450;Naphthalene degradation;Metabolic pathways;Degradation of aromatic compounds;Microbial metabolism in diverse environments;Fatty acid degradation;Chloroalkane and chloroalkene degradation;Tyrosine metabolism;Pyruvate metabolism;Drug metabolism - cytochrome P450;Glycolysis / Gluconeogenesis;Biosynthesis of secondary metabolites;Retinol metabolism
MAG141_gene2132	DY_1_k97_56178_ORF2114	MAG141	d__Bacteria;p__Actinomycetota;c__Acidimicrobiia;o__UBA5794;f__ZC4RG35;g__Unclassified;s__Unclassified	2766	1990	777	K00001	adh	alcohol dehydrogenase [EC:1.1.1.1]	Metabolism of xenobiotics by cytochrome P450;Naphthalene degradation;Metabolic pathways;Degradation of aromatic compounds;Microbial metabolism in diverse environments;Fatty acid degradation;Chloroalkane and chloroalkene degradation;Tyrosine metabolism;Pyruvate metabolism;Drug metabolism - cytochrome P450;Glycolysis / Gluconeogenesis;Biosynthesis of secondary metabolites;Retinol metabolism
MAG142_gene0479	CPT_SW_2_k97_1085735_ORF473	MAG142	d__Bacteria;p__Pseudomonadota;c__Alphaproteobacteria;o__Rhizobiales;f__Methyloligellaceae;g__Methyloceanibacter;s__Unclassified	1416	2591	1176	K00001	adh	alcohol dehydrogenase [EC:1.1.1.1]	Metabolism of xenobiotics by cytochrome P450;Naphthalene degradation;Metabolic pathways;Degradation of aromatic compounds;Microbial metabolism in diverse environments;Fatty acid degradation;Chloroalkane and chloroalkene degradation;Tyrosine metabolism;Pyruvate metabolism;Drug metabolism - cytochrome P450;Glycolysis / Gluconeogenesis;Biosynthesis of secondary metabolites;Retinol metabolism
MAG143_gene0264	CPT_MZ_2_k97_316196_ORF262	MAG143	d__Archaea;p__Thermoproteota;c__Nitrososphaeria;o__Nitrososphaerales;f__Nitrosopumilaceae;g__JACEMX01;s__Unclassified	1352	273	1080	K00001	adh	alcohol dehydrogenase [EC:1.1.1.1]	Metabolism of xenobiotics by cytochrome P450;Naphthalene degradation;Metabolic pathways;Degradation of aromatic compounds;Microbial metabolism in diverse environments;Fatty acid degradation;Chloroalkane and chloroalkene degradation;Tyrosine metabolism;Pyruvate metabolism;Drug metabolism - cytochrome P450;Glycolysis / Gluconeogenesis;Biosynthesis of secondary metabolites;Retinol metabolism
MAG143_gene0385	CPT_MZ_2_k97_494255_ORF381	MAG143	d__Archaea;p__Thermoproteota;c__Nitrososphaeria;o__Nitrososphaerales;f__Nitrosopumilaceae;g__JACEMX01;s__Unclassified	2191	1778	414	K00001	adh	alcohol dehydrogenase [EC:1.1.1.1]	Metabolism of xenobiotics by cytochrome P450;Naphthalene degradation;Metabolic pathways;Degradation of aromatic compounds;Microbial metabolism in diverse environments;Fatty acid degradation;Chloroalkane and chloroalkene degradation;Tyrosine metabolism;Pyruvate metabolism;Drug metabolism - cytochrome P450;Glycolysis / Gluconeogenesis;Biosynthesis of secondary metabolites;Retinol metabolism
MAG143_gene1840	CPT_MZ_2_k97_888718_ORF1822	MAG143	d__Archaea;p__Thermoproteota;c__Nitrososphaeria;o__Nitrososphaerales;f__Nitrosopumilaceae;g__JACEMX01;s__Unclassified	2	253	252	K00001	adh	alcohol dehydrogenase [EC:1.1.1.1]	Metabolism of xenobiotics by cytochrome P450;Naphthalene degradation;Metabolic pathways;Degradation of aromatic compounds;Microbial metabolism in diverse environments;Fatty acid degradation;Chloroalkane and chloroalkene degradation;Tyrosine metabolism;Pyruvate metabolism;Drug metabolism - cytochrome P450;Glycolysis / Gluconeogenesis;Biosynthesis of secondary metabolites;Retinol metabolism
MAG144_gene1336	M3_2_2_k97_807011_ORF1328	MAG144	d__Bacteria;p__Actinomycetota;c__Acidimicrobiia;o__Acidimicrobiales;f__Microtrichaceae;g__JAAEPF01;s__Unclassified	4099	3059	1041	K00001	adh	alcohol dehydrogenase [EC:1.1.1.1]	Metabolism of xenobiotics by cytochrome P450;Naphthalene degradation;Metabolic pathways;Degradation of aromatic compounds;Microbial metabolism in diverse environments;Fatty acid degradation;Chloroalkane and chloroalkene degradation;Tyrosine metabolism;Pyruvate metabolism;Drug metabolism - cytochrome P450;Glycolysis / Gluconeogenesis;Biosynthesis of secondary metabolites;Retinol metabolism
MAG147_gene3056	FG_SC_3_k97_952769_ORF3033	MAG147	d__Bacteria;p__Pseudomonadota;c__Gammaproteobacteria;o__Burkholderiales;f__Burkholderiaceae_A;g__JADJWR01;s__Unclassified	1	777	777	K00001	adh	alcohol dehydrogenase [EC:1.1.1.1]	Metabolism of xenobiotics by cytochrome P450;Naphthalene degradation;Metabolic pathways;Degradation of aromatic compounds;Microbial metabolism in diverse environments;Fatty acid degradation;Chloroalkane and chloroalkene degradation;Tyrosine metabolism;Pyruvate metabolism;Drug metabolism - cytochrome P450;Glycolysis / Gluconeogenesis;Biosynthesis of secondary metabolites;Retinol metabolism
MAG148_gene3003	CPT_SW_3_k97_1222344_ORF2982	MAG148	d__Bacteria;p__Chloroflexota;c__Anaerolineae;o__Anaerolineales;f__UBA4823;g__DSOS01;s__Unclassified	626	1666	1041	K00001	adh	alcohol dehydrogenase [EC:1.1.1.1]	Metabolism of xenobiotics by cytochrome P450;Naphthalene degradation;Metabolic pathways;Degradation of aromatic compounds;Microbial metabolism in diverse environments;Fatty acid degradation;Chloroalkane and chloroalkene degradation;Tyrosine metabolism;Pyruvate metabolism;Drug metabolism - cytochrome P450;Glycolysis / Gluconeogenesis;Biosynthesis of secondary metabolites;Retinol metabolism
MAG148_gene3179	CPT_SW_3_k97_265782_ORF3155	MAG148	d__Bacteria;p__Chloroflexota;c__Anaerolineae;o__Anaerolineales;f__UBA4823;g__DSOS01;s__Unclassified	3	686	684	K00001	adh	alcohol dehydrogenase [EC:1.1.1.1]	Metabolism of xenobiotics by cytochrome P450;Naphthalene degradation;Metabolic pathways;Degradation of aromatic compounds;Microbial metabolism in diverse environments;Fatty acid degradation;Chloroalkane and chloroalkene degradation;Tyrosine metabolism;Pyruvate metabolism;Drug metabolism - cytochrome P450;Glycolysis / Gluconeogenesis;Biosynthesis of secondary metabolites;Retinol metabolism
MAG149_gene2570	M1_1_1_k97_356433_ORF2547	MAG149	d__Bacteria;p__Bacteroidota;c__Bacteroidia;o__Flavobacteriales;f__Flavobacteriaceae;g__Robiginitalea;s__Unclassified	965	3	963	K00001	adh	alcohol dehydrogenase [EC:1.1.1.1]	Metabolism of xenobiotics by cytochrome P450;Naphthalene degradation;Metabolic pathways;Degradation of aromatic compounds;Microbial metabolism in diverse environments;Fatty acid degradation;Chloroalkane and chloroalkene degradation;Tyrosine metabolism;Pyruvate metabolism;Drug metabolism - cytochrome P450;Glycolysis / Gluconeogenesis;Biosynthesis of secondary metabolites;Retinol metabolism
MAG15_gene0547	M2_2_1_k97_491002_ORF545	MAG15	d__Bacteria;p__Bacteroidota;c__Bacteroidia;o__Bacteroidales;f__VadinHA17;g__LD21;s__Unclassified	24908	23730	1179	K00001	adh	alcohol dehydrogenase [EC:1.1.1.1]	Metabolism of xenobiotics by cytochrome P450;Naphthalene degradation;Metabolic pathways;Degradation of aromatic compounds;Microbial metabolism in diverse environments;Fatty acid degradation;Chloroalkane and chloroalkene degradation;Tyrosine metabolism;Pyruvate metabolism;Drug metabolism - cytochrome P450;Glycolysis / Gluconeogenesis;Biosynthesis of secondary metabolites;Retinol metabolism
MAG150_gene1011	DY_2_k97_320424_ORF1004	MAG150	d__Bacteria;p__Actinomycetota;c__Acidimicrobiia;o__UBA5794;f__ZC4RG35;g__Unclassified;s__Unclassified	4804	3821	984	K00001	adh	alcohol dehydrogenase [EC:1.1.1.1]	Metabolism of xenobiotics by cytochrome P450;Naphthalene degradation;Metabolic pathways;Degradation of aromatic compounds;Microbial metabolism in diverse environments;Fatty acid degradation;Chloroalkane and chloroalkene degradation;Tyrosine metabolism;Pyruvate metabolism;Drug metabolism - cytochrome P450;Glycolysis / Gluconeogenesis;Biosynthesis of secondary metabolites;Retinol metabolism
MAG150_gene1155	DY_2_k97_548215_ORF1148	MAG150	d__Bacteria;p__Actinomycetota;c__Acidimicrobiia;o__UBA5794;f__ZC4RG35;g__Unclassified;s__Unclassified	5649	4621	1029	K00001	adh	alcohol dehydrogenase [EC:1.1.1.1]	Metabolism of xenobiotics by cytochrome P450;Naphthalene degradation;Metabolic pathways;Degradation of aromatic compounds;Microbial metabolism in diverse environments;Fatty acid degradation;Chloroalkane and chloroalkene degradation;Tyrosine metabolism;Pyruvate metabolism;Drug metabolism - cytochrome P450;Glycolysis / Gluconeogenesis;Biosynthesis of secondary metabolites;Retinol metabolism
MAG150_gene1304	DY_2_k97_12948_ORF1295	MAG150	d__Bacteria;p__Actinomycetota;c__Acidimicrobiia;o__UBA5794;f__ZC4RG35;g__Unclassified;s__Unclassified	2548	3621	1074	K00001	adh	alcohol dehydrogenase [EC:1.1.1.1]	Metabolism of xenobiotics by cytochrome P450;Naphthalene degradation;Metabolic pathways;Degradation of aromatic compounds;Microbial metabolism in diverse environments;Fatty acid degradation;Chloroalkane and chloroalkene degradation;Tyrosine metabolism;Pyruvate metabolism;Drug metabolism - cytochrome P450;Glycolysis / Gluconeogenesis;Biosynthesis of secondary metabolites;Retinol metabolism
MAG152_gene2420	DY_3_k97_101785_ORF2395	MAG152	d__Bacteria;p__Bacteroidota;c__Bacteroidia;o__Flavobacteriales;f__Flavobacteriaceae;g__Robiginitalea;s__Unclassified	5552	4500	1053	K00001	adh	alcohol dehydrogenase [EC:1.1.1.1]	Metabolism of xenobiotics by cytochrome P450;Naphthalene degradation;Metabolic pathways;Degradation of aromatic compounds;Microbial metabolism in diverse environments;Fatty acid degradation;Chloroalkane and chloroalkene degradation;Tyrosine metabolism;Pyruvate metabolism;Drug metabolism - cytochrome P450;Glycolysis / Gluconeogenesis;Biosynthesis of secondary metabolites;Retinol metabolism
MAG153_gene0615	M2_2_3_k97_1891759_ORF611	MAG153	d__Bacteria;p__Pseudomonadota;c__Gammaproteobacteria;o__Chromatiales;f__Sedimenticolaceae;g__Unclassified;s__Unclassified	6432	7613	1182	K00001	adh	alcohol dehydrogenase [EC:1.1.1.1]	Metabolism of xenobiotics by cytochrome P450;Naphthalene degradation;Metabolic pathways;Degradation of aromatic compounds;Microbial metabolism in diverse environments;Fatty acid degradation;Chloroalkane and chloroalkene degradation;Tyrosine metabolism;Pyruvate metabolism;Drug metabolism - cytochrome P450;Glycolysis / Gluconeogenesis;Biosynthesis of secondary metabolites;Retinol metabolism
MAG154_gene0353	M1_2_3_k97_701051_ORF353	MAG154	d__Bacteria;p__Desulfobacterota;c__Desulfobulbia;o__Desulfobulbales;f__Desulfocapsaceae;g__JABDQA01;s__Unclassified	3268	3915	648	K00001	adh	alcohol dehydrogenase [EC:1.1.1.1]	Metabolism of xenobiotics by cytochrome P450;Naphthalene degradation;Metabolic pathways;Degradation of aromatic compounds;Microbial metabolism in diverse environments;Fatty acid degradation;Chloroalkane and chloroalkene degradation;Tyrosine metabolism;Pyruvate metabolism;Drug metabolism - cytochrome P450;Glycolysis / Gluconeogenesis;Biosynthesis of secondary metabolites;Retinol metabolism
MAG154_gene0407	M1_2_3_k97_819595_ORF406	MAG154	d__Bacteria;p__Desulfobacterota;c__Desulfobulbia;o__Desulfobulbales;f__Desulfocapsaceae;g__JABDQA01;s__Unclassified	3762	2980	783	K00001	adh	alcohol dehydrogenase [EC:1.1.1.1]	Metabolism of xenobiotics by cytochrome P450;Naphthalene degradation;Metabolic pathways;Degradation of aromatic compounds;Microbial metabolism in diverse environments;Fatty acid degradation;Chloroalkane and chloroalkene degradation;Tyrosine metabolism;Pyruvate metabolism;Drug metabolism - cytochrome P450;Glycolysis / Gluconeogenesis;Biosynthesis of secondary metabolites;Retinol metabolism
MAG154_gene2047	M1_2_3_k97_517581_ORF2034	MAG154	d__Bacteria;p__Desulfobacterota;c__Desulfobulbia;o__Desulfobulbales;f__Desulfocapsaceae;g__JABDQA01;s__Unclassified	364	2	363	K00001	adh	alcohol dehydrogenase [EC:1.1.1.1]	Metabolism of xenobiotics by cytochrome P450;Naphthalene degradation;Metabolic pathways;Degradation of aromatic compounds;Microbial metabolism in diverse environments;Fatty acid degradation;Chloroalkane and chloroalkene degradation;Tyrosine metabolism;Pyruvate metabolism;Drug metabolism - cytochrome P450;Glycolysis / Gluconeogenesis;Biosynthesis of secondary metabolites;Retinol metabolism
MAG155_gene0615	CPT_SW_1_k97_1185430_ORF611	MAG155	d__Archaea;p__Thermoproteota;c__Nitrososphaeria;o__Nitrososphaerales;f__Nitrososphaeraceae;g__TH1177;s__Unclassified	2676	1627	1050	K00001	adh	alcohol dehydrogenase [EC:1.1.1.1]	Metabolism of xenobiotics by cytochrome P450;Naphthalene degradation;Metabolic pathways;Degradation of aromatic compounds;Microbial metabolism in diverse environments;Fatty acid degradation;Chloroalkane and chloroalkene degradation;Tyrosine metabolism;Pyruvate metabolism;Drug metabolism - cytochrome P450;Glycolysis / Gluconeogenesis;Biosynthesis of secondary metabolites;Retinol metabolism
MAG155_gene0652	CPT_SW_1_k97_1353376_ORF647	MAG155	d__Archaea;p__Thermoproteota;c__Nitrososphaeria;o__Nitrososphaerales;f__Nitrososphaeraceae;g__TH1177;s__Unclassified	130	636	507	K00001	adh	alcohol dehydrogenase [EC:1.1.1.1]	Metabolism of xenobiotics by cytochrome P450;Naphthalene degradation;Metabolic pathways;Degradation of aromatic compounds;Microbial metabolism in diverse environments;Fatty acid degradation;Chloroalkane and chloroalkene degradation;Tyrosine metabolism;Pyruvate metabolism;Drug metabolism - cytochrome P450;Glycolysis / Gluconeogenesis;Biosynthesis of secondary metabolites;Retinol metabolism
MAG155_gene1238	CPT_SW_1_k97_151094_ORF1232	MAG155	d__Archaea;p__Thermoproteota;c__Nitrososphaeria;o__Nitrososphaerales;f__Nitrososphaeraceae;g__TH1177;s__Unclassified	3	992	990	K00001	adh	alcohol dehydrogenase [EC:1.1.1.1]	Metabolism of xenobiotics by cytochrome P450;Naphthalene degradation;Metabolic pathways;Degradation of aromatic compounds;Microbial metabolism in diverse environments;Fatty acid degradation;Chloroalkane and chloroalkene degradation;Tyrosine metabolism;Pyruvate metabolism;Drug metabolism - cytochrome P450;Glycolysis / Gluconeogenesis;Biosynthesis of secondary metabolites;Retinol metabolism
MAG155_gene1322	CPT_SW_1_k97_1288262_ORF1316	MAG155	d__Archaea;p__Thermoproteota;c__Nitrososphaeria;o__Nitrososphaerales;f__Nitrososphaeraceae;g__TH1177;s__Unclassified	346	47	300	K00001	adh	alcohol dehydrogenase [EC:1.1.1.1]	Metabolism of xenobiotics by cytochrome P450;Naphthalene degradation;Metabolic pathways;Degradation of aromatic compounds;Microbial metabolism in diverse environments;Fatty acid degradation;Chloroalkane and chloroalkene degradation;Tyrosine metabolism;Pyruvate metabolism;Drug metabolism - cytochrome P450;Glycolysis / Gluconeogenesis;Biosynthesis of secondary metabolites;Retinol metabolism
MAG155_gene1576	CPT_SW_1_k97_1243110_ORF1568	MAG155	d__Archaea;p__Thermoproteota;c__Nitrososphaeria;o__Nitrososphaerales;f__Nitrososphaeraceae;g__TH1177;s__Unclassified	904	2	903	K00001	adh	alcohol dehydrogenase [EC:1.1.1.1]	Metabolism of xenobiotics by cytochrome P450;Naphthalene degradation;Metabolic pathways;Degradation of aromatic compounds;Microbial metabolism in diverse environments;Fatty acid degradation;Chloroalkane and chloroalkene degradation;Tyrosine metabolism;Pyruvate metabolism;Drug metabolism - cytochrome P450;Glycolysis / Gluconeogenesis;Biosynthesis of secondary metabolites;Retinol metabolism
MAG156_gene1433	FG_SC_1_k97_1292038_ORF1419	MAG156	d__Bacteria;p__Actinomycetota;c__Acidimicrobiia;o__UBA5794;f__ZC4RG35;g__Unclassified;s__Unclassified	5323	6378	1056	K00001	adh	alcohol dehydrogenase [EC:1.1.1.1]	Metabolism of xenobiotics by cytochrome P450;Naphthalene degradation;Metabolic pathways;Degradation of aromatic compounds;Microbial metabolism in diverse environments;Fatty acid degradation;Chloroalkane and chloroalkene degradation;Tyrosine metabolism;Pyruvate metabolism;Drug metabolism - cytochrome P450;Glycolysis / Gluconeogenesis;Biosynthesis of secondary metabolites;Retinol metabolism
MAG156_gene2071	FG_SC_1_k97_1157593_ORF2054	MAG156	d__Bacteria;p__Actinomycetota;c__Acidimicrobiia;o__UBA5794;f__ZC4RG35;g__Unclassified;s__Unclassified	2924	3946	1023	K00001	adh	alcohol dehydrogenase [EC:1.1.1.1]	Metabolism of xenobiotics by cytochrome P450;Naphthalene degradation;Metabolic pathways;Degradation of aromatic compounds;Microbial metabolism in diverse environments;Fatty acid degradation;Chloroalkane and chloroalkene degradation;Tyrosine metabolism;Pyruvate metabolism;Drug metabolism - cytochrome P450;Glycolysis / Gluconeogenesis;Biosynthesis of secondary metabolites;Retinol metabolism
MAG156_gene2430	FG_SC_1_k97_762786_ORF2406	MAG156	d__Bacteria;p__Actinomycetota;c__Acidimicrobiia;o__UBA5794;f__ZC4RG35;g__Unclassified;s__Unclassified	1831	779	1053	K00001	adh	alcohol dehydrogenase [EC:1.1.1.1]	Metabolism of xenobiotics by cytochrome P450;Naphthalene degradation;Metabolic pathways;Degradation of aromatic compounds;Microbial metabolism in diverse environments;Fatty acid degradation;Chloroalkane and chloroalkene degradation;Tyrosine metabolism;Pyruvate metabolism;Drug metabolism - cytochrome P450;Glycolysis / Gluconeogenesis;Biosynthesis of secondary metabolites;Retinol metabolism
MAG157_gene0469	M2_1_1_k97_1639197_ORF464	MAG157	d__Bacteria;p__Actinomycetota;c__Actinomycetia;o__Jiangellales;f__Unclassified;g__Unclassified;s__Unclassified	4821	5852	1032	K00001	adh	alcohol dehydrogenase [EC:1.1.1.1]	Metabolism of xenobiotics by cytochrome P450;Naphthalene degradation;Metabolic pathways;Degradation of aromatic compounds;Microbial metabolism in diverse environments;Fatty acid degradation;Chloroalkane and chloroalkene degradation;Tyrosine metabolism;Pyruvate metabolism;Drug metabolism - cytochrome P450;Glycolysis / Gluconeogenesis;Biosynthesis of secondary metabolites;Retinol metabolism
MAG157_gene1190	M2_1_1_k97_383503_ORF1171	MAG157	d__Bacteria;p__Actinomycetota;c__Actinomycetia;o__Jiangellales;f__Unclassified;g__Unclassified;s__Unclassified	6377	5340	1038	K00001	adh	alcohol dehydrogenase [EC:1.1.1.1]	Metabolism of xenobiotics by cytochrome P450;Naphthalene degradation;Metabolic pathways;Degradation of aromatic compounds;Microbial metabolism in diverse environments;Fatty acid degradation;Chloroalkane and chloroalkene degradation;Tyrosine metabolism;Pyruvate metabolism;Drug metabolism - cytochrome P450;Glycolysis / Gluconeogenesis;Biosynthesis of secondary metabolites;Retinol metabolism
MAG157_gene2287	M2_1_1_k97_888191_ORF2255	MAG157	d__Bacteria;p__Actinomycetota;c__Actinomycetia;o__Jiangellales;f__Unclassified;g__Unclassified;s__Unclassified	1153	164	990	K00001	adh	alcohol dehydrogenase [EC:1.1.1.1]	Metabolism of xenobiotics by cytochrome P450;Naphthalene degradation;Metabolic pathways;Degradation of aromatic compounds;Microbial metabolism in diverse environments;Fatty acid degradation;Chloroalkane and chloroalkene degradation;Tyrosine metabolism;Pyruvate metabolism;Drug metabolism - cytochrome P450;Glycolysis / Gluconeogenesis;Biosynthesis of secondary metabolites;Retinol metabolism
MAG159_gene0971	M3_2_3_k97_22531_ORF963	MAG159	d__Bacteria;p__Actinomycetota;c__Actinomycetia;o__Nanopelagicales;f__CAIYMF01;g__Unclassified;s__Unclassified	17024	18049	1026	K00001	adh	alcohol dehydrogenase [EC:1.1.1.1]	Metabolism of xenobiotics by cytochrome P450;Naphthalene degradation;Metabolic pathways;Degradation of aromatic compounds;Microbial metabolism in diverse environments;Fatty acid degradation;Chloroalkane and chloroalkene degradation;Tyrosine metabolism;Pyruvate metabolism;Drug metabolism - cytochrome P450;Glycolysis / Gluconeogenesis;Biosynthesis of secondary metabolites;Retinol metabolism
MAG159_gene1315	M3_2_3_k97_1347775_ORF1302	MAG159	d__Bacteria;p__Actinomycetota;c__Actinomycetia;o__Nanopelagicales;f__CAIYMF01;g__Unclassified;s__Unclassified	8231	7197	1035	K00001	adh	alcohol dehydrogenase [EC:1.1.1.1]	Metabolism of xenobiotics by cytochrome P450;Naphthalene degradation;Metabolic pathways;Degradation of aromatic compounds;Microbial metabolism in diverse environments;Fatty acid degradation;Chloroalkane and chloroalkene degradation;Tyrosine metabolism;Pyruvate metabolism;Drug metabolism - cytochrome P450;Glycolysis / Gluconeogenesis;Biosynthesis of secondary metabolites;Retinol metabolism
MAG160_gene0801	M2_1_1_k97_1315331_ORF789	MAG160	d__Bacteria;p__Actinomycetota;c__Acidimicrobiia;o__Acidimicrobiales;f__UBA8139;g__Rhabdothermincola_A;s__Unclassified	379	2	378	K00001	adh	alcohol dehydrogenase [EC:1.1.1.1]	Metabolism of xenobiotics by cytochrome P450;Naphthalene degradation;Metabolic pathways;Degradation of aromatic compounds;Microbial metabolism in diverse environments;Fatty acid degradation;Chloroalkane and chloroalkene degradation;Tyrosine metabolism;Pyruvate metabolism;Drug metabolism - cytochrome P450;Glycolysis / Gluconeogenesis;Biosynthesis of secondary metabolites;Retinol metabolism
MAG160_gene2882	M2_1_1_k97_240737_ORF2859	MAG160	d__Bacteria;p__Actinomycetota;c__Acidimicrobiia;o__Acidimicrobiales;f__UBA8139;g__Rhabdothermincola_A;s__Unclassified	631	1686	1056	K00001	adh	alcohol dehydrogenase [EC:1.1.1.1]	Metabolism of xenobiotics by cytochrome P450;Naphthalene degradation;Metabolic pathways;Degradation of aromatic compounds;Microbial metabolism in diverse environments;Fatty acid degradation;Chloroalkane and chloroalkene degradation;Tyrosine metabolism;Pyruvate metabolism;Drug metabolism - cytochrome P450;Glycolysis / Gluconeogenesis;Biosynthesis of secondary metabolites;Retinol metabolism
MAG162_gene0006	M3_1_1_k97_284812_ORF06	MAG162	d__Bacteria;p__Actinomycetota;c__Acidimicrobiia;o__Acidimicrobiales;f__Ilumatobacteraceae;g__Ilumatobacter;s__Unclassified	6153	5056	1098	K00001	adh	alcohol dehydrogenase [EC:1.1.1.1]	Metabolism of xenobiotics by cytochrome P450;Naphthalene degradation;Metabolic pathways;Degradation of aromatic compounds;Microbial metabolism in diverse environments;Fatty acid degradation;Chloroalkane and chloroalkene degradation;Tyrosine metabolism;Pyruvate metabolism;Drug metabolism - cytochrome P450;Glycolysis / Gluconeogenesis;Biosynthesis of secondary metabolites;Retinol metabolism
MAG162_gene0068	M3_1_1_k97_1503185_ORF67	MAG162	d__Bacteria;p__Actinomycetota;c__Acidimicrobiia;o__Acidimicrobiales;f__Ilumatobacteraceae;g__Ilumatobacter;s__Unclassified	13825	14922	1098	K00001	adh	alcohol dehydrogenase [EC:1.1.1.1]	Metabolism of xenobiotics by cytochrome P450;Naphthalene degradation;Metabolic pathways;Degradation of aromatic compounds;Microbial metabolism in diverse environments;Fatty acid degradation;Chloroalkane and chloroalkene degradation;Tyrosine metabolism;Pyruvate metabolism;Drug metabolism - cytochrome P450;Glycolysis / Gluconeogenesis;Biosynthesis of secondary metabolites;Retinol metabolism
MAG162_gene0363	M3_1_1_k97_1008228_ORF362	MAG162	d__Bacteria;p__Actinomycetota;c__Acidimicrobiia;o__Acidimicrobiales;f__Ilumatobacteraceae;g__Ilumatobacter;s__Unclassified	6762	7838	1077	K00001	adh	alcohol dehydrogenase [EC:1.1.1.1]	Metabolism of xenobiotics by cytochrome P450;Naphthalene degradation;Metabolic pathways;Degradation of aromatic compounds;Microbial metabolism in diverse environments;Fatty acid degradation;Chloroalkane and chloroalkene degradation;Tyrosine metabolism;Pyruvate metabolism;Drug metabolism - cytochrome P450;Glycolysis / Gluconeogenesis;Biosynthesis of secondary metabolites;Retinol metabolism
MAG162_gene1394	M3_1_1_k97_549878_ORF1386	MAG162	d__Bacteria;p__Actinomycetota;c__Acidimicrobiia;o__Acidimicrobiales;f__Ilumatobacteraceae;g__Ilumatobacter;s__Unclassified	3678	4868	1191	K00001	adh	alcohol dehydrogenase [EC:1.1.1.1]	Metabolism of xenobiotics by cytochrome P450;Naphthalene degradation;Metabolic pathways;Degradation of aromatic compounds;Microbial metabolism in diverse environments;Fatty acid degradation;Chloroalkane and chloroalkene degradation;Tyrosine metabolism;Pyruvate metabolism;Drug metabolism - cytochrome P450;Glycolysis / Gluconeogenesis;Biosynthesis of secondary metabolites;Retinol metabolism
MAG162_gene1935	M3_1_1_k97_1409748_ORF1921	MAG162	d__Bacteria;p__Actinomycetota;c__Acidimicrobiia;o__Acidimicrobiales;f__Ilumatobacteraceae;g__Ilumatobacter;s__Unclassified	1282	317	966	K00001	adh	alcohol dehydrogenase [EC:1.1.1.1]	Metabolism of xenobiotics by cytochrome P450;Naphthalene degradation;Metabolic pathways;Degradation of aromatic compounds;Microbial metabolism in diverse environments;Fatty acid degradation;Chloroalkane and chloroalkene degradation;Tyrosine metabolism;Pyruvate metabolism;Drug metabolism - cytochrome P450;Glycolysis / Gluconeogenesis;Biosynthesis of secondary metabolites;Retinol metabolism
MAG163_gene1083	CPT_MZ_1_k97_1265871_ORF1075	MAG163	d__Bacteria;p__Chloroflexota;c__Anaerolineae;o__Anaerolineales;f__UBA4823;g__DSOS01;s__Unclassified	2	934	933	K00001	adh	alcohol dehydrogenase [EC:1.1.1.1]	Metabolism of xenobiotics by cytochrome P450;Naphthalene degradation;Metabolic pathways;Degradation of aromatic compounds;Microbial metabolism in diverse environments;Fatty acid degradation;Chloroalkane and chloroalkene degradation;Tyrosine metabolism;Pyruvate metabolism;Drug metabolism - cytochrome P450;Glycolysis / Gluconeogenesis;Biosynthesis of secondary metabolites;Retinol metabolism
MAG163_gene3529	CPT_MZ_1_k97_1383735_ORF3507	MAG163	d__Bacteria;p__Chloroflexota;c__Anaerolineae;o__Anaerolineales;f__UBA4823;g__DSOS01;s__Unclassified	1890	916	975	K00001	adh	alcohol dehydrogenase [EC:1.1.1.1]	Metabolism of xenobiotics by cytochrome P450;Naphthalene degradation;Metabolic pathways;Degradation of aromatic compounds;Microbial metabolism in diverse environments;Fatty acid degradation;Chloroalkane and chloroalkene degradation;Tyrosine metabolism;Pyruvate metabolism;Drug metabolism - cytochrome P450;Glycolysis / Gluconeogenesis;Biosynthesis of secondary metabolites;Retinol metabolism
MAG163_gene5016	CPT_MZ_1_k97_1085437_ORF4981	MAG163	d__Bacteria;p__Chloroflexota;c__Anaerolineae;o__Anaerolineales;f__UBA4823;g__DSOS01;s__Unclassified	1380	379	1002	K00001	adh	alcohol dehydrogenase [EC:1.1.1.1]	Metabolism of xenobiotics by cytochrome P450;Naphthalene degradation;Metabolic pathways;Degradation of aromatic compounds;Microbial metabolism in diverse environments;Fatty acid degradation;Chloroalkane and chloroalkene degradation;Tyrosine metabolism;Pyruvate metabolism;Drug metabolism - cytochrome P450;Glycolysis / Gluconeogenesis;Biosynthesis of secondary metabolites;Retinol metabolism
MAG163_gene5035	CPT_MZ_1_k97_796040_ORF5000	MAG163	d__Bacteria;p__Chloroflexota;c__Anaerolineae;o__Anaerolineales;f__UBA4823;g__DSOS01;s__Unclassified	1651	1761	111	K00001	adh	alcohol dehydrogenase [EC:1.1.1.1]	Metabolism of xenobiotics by cytochrome P450;Naphthalene degradation;Metabolic pathways;Degradation of aromatic compounds;Microbial metabolism in diverse environments;Fatty acid degradation;Chloroalkane and chloroalkene degradation;Tyrosine metabolism;Pyruvate metabolism;Drug metabolism - cytochrome P450;Glycolysis / Gluconeogenesis;Biosynthesis of secondary metabolites;Retinol metabolism
MAG164_gene0198	DY_3_k97_80419_ORF194	MAG164	d__Bacteria;p__Chloroflexota;c__Anaerolineae;o__Anaerolineales;f__UBA4823;g__PFL25;s__PFL25 sp020349245	1028	2050	1023	K00001	adh	alcohol dehydrogenase [EC:1.1.1.1]	Metabolism of xenobiotics by cytochrome P450;Naphthalene degradation;Metabolic pathways;Degradation of aromatic compounds;Microbial metabolism in diverse environments;Fatty acid degradation;Chloroalkane and chloroalkene degradation;Tyrosine metabolism;Pyruvate metabolism;Drug metabolism - cytochrome P450;Glycolysis / Gluconeogenesis;Biosynthesis of secondary metabolites;Retinol metabolism
MAG164_gene0257	DY_3_k97_610221_ORF253	MAG164	d__Bacteria;p__Chloroflexota;c__Anaerolineae;o__Anaerolineales;f__UBA4823;g__PFL25;s__PFL25 sp020349245	5225	4863	363	K00001	adh	alcohol dehydrogenase [EC:1.1.1.1]	Metabolism of xenobiotics by cytochrome P450;Naphthalene degradation;Metabolic pathways;Degradation of aromatic compounds;Microbial metabolism in diverse environments;Fatty acid degradation;Chloroalkane and chloroalkene degradation;Tyrosine metabolism;Pyruvate metabolism;Drug metabolism - cytochrome P450;Glycolysis / Gluconeogenesis;Biosynthesis of secondary metabolites;Retinol metabolism
MAG164_gene0289	DY_3_k97_702988_ORF284	MAG164	d__Bacteria;p__Chloroflexota;c__Anaerolineae;o__Anaerolineales;f__UBA4823;g__PFL25;s__PFL25 sp020349245	4659	3709	951	K00001	adh	alcohol dehydrogenase [EC:1.1.1.1]	Metabolism of xenobiotics by cytochrome P450;Naphthalene degradation;Metabolic pathways;Degradation of aromatic compounds;Microbial metabolism in diverse environments;Fatty acid degradation;Chloroalkane and chloroalkene degradation;Tyrosine metabolism;Pyruvate metabolism;Drug metabolism - cytochrome P450;Glycolysis / Gluconeogenesis;Biosynthesis of secondary metabolites;Retinol metabolism
MAG164_gene2249	DY_3_k97_857551_ORF2227	MAG164	d__Bacteria;p__Chloroflexota;c__Anaerolineae;o__Anaerolineales;f__UBA4823;g__PFL25;s__PFL25 sp020349245	1324	287	1038	K00001	adh	alcohol dehydrogenase [EC:1.1.1.1]	Metabolism of xenobiotics by cytochrome P450;Naphthalene degradation;Metabolic pathways;Degradation of aromatic compounds;Microbial metabolism in diverse environments;Fatty acid degradation;Chloroalkane and chloroalkene degradation;Tyrosine metabolism;Pyruvate metabolism;Drug metabolism - cytochrome P450;Glycolysis / Gluconeogenesis;Biosynthesis of secondary metabolites;Retinol metabolism
MAG164_gene2394	DY_3_k97_177619_ORF2372	MAG164	d__Bacteria;p__Chloroflexota;c__Anaerolineae;o__Anaerolineales;f__UBA4823;g__PFL25;s__PFL25 sp020349245	986	21	966	K00001	adh	alcohol dehydrogenase [EC:1.1.1.1]	Metabolism of xenobiotics by cytochrome P450;Naphthalene degradation;Metabolic pathways;Degradation of aromatic compounds;Microbial metabolism in diverse environments;Fatty acid degradation;Chloroalkane and chloroalkene degradation;Tyrosine metabolism;Pyruvate metabolism;Drug metabolism - cytochrome P450;Glycolysis / Gluconeogenesis;Biosynthesis of secondary metabolites;Retinol metabolism
MAG165_gene1813	M1_1_3_k97_245848_ORF1788	MAG165	d__Bacteria;p__Pseudomonadota;c__Alphaproteobacteria;o__Rhizobiales;f__Methyloligellaceae;g__Methyloceanibacter;s__Unclassified	151	2	150	K00001	adh	alcohol dehydrogenase [EC:1.1.1.1]	Metabolism of xenobiotics by cytochrome P450;Naphthalene degradation;Metabolic pathways;Degradation of aromatic compounds;Microbial metabolism in diverse environments;Fatty acid degradation;Chloroalkane and chloroalkene degradation;Tyrosine metabolism;Pyruvate metabolism;Drug metabolism - cytochrome P450;Glycolysis / Gluconeogenesis;Biosynthesis of secondary metabolites;Retinol metabolism
MAG166_gene1576	FG_SC_1_k97_1356542_ORF1560	MAG166	d__Bacteria;p__Chloroflexota;c__Anaerolineae;o__Anaerolineales;f__DRKV01;g__JAGUYX01;s__Unclassified	873	1	873	K00001	adh	alcohol dehydrogenase [EC:1.1.1.1]	Metabolism of xenobiotics by cytochrome P450;Naphthalene degradation;Metabolic pathways;Degradation of aromatic compounds;Microbial metabolism in diverse environments;Fatty acid degradation;Chloroalkane and chloroalkene degradation;Tyrosine metabolism;Pyruvate metabolism;Drug metabolism - cytochrome P450;Glycolysis / Gluconeogenesis;Biosynthesis of secondary metabolites;Retinol metabolism
MAG166_gene2247	FG_SC_1_k97_748354_ORF2225	MAG166	d__Bacteria;p__Chloroflexota;c__Anaerolineae;o__Anaerolineales;f__DRKV01;g__JAGUYX01;s__Unclassified	195	1226	1032	K00001	adh	alcohol dehydrogenase [EC:1.1.1.1]	Metabolism of xenobiotics by cytochrome P450;Naphthalene degradation;Metabolic pathways;Degradation of aromatic compounds;Microbial metabolism in diverse environments;Fatty acid degradation;Chloroalkane and chloroalkene degradation;Tyrosine metabolism;Pyruvate metabolism;Drug metabolism - cytochrome P450;Glycolysis / Gluconeogenesis;Biosynthesis of secondary metabolites;Retinol metabolism
MAG166_gene2298	FG_SC_1_k97_1352286_ORF2275	MAG166	d__Bacteria;p__Chloroflexota;c__Anaerolineae;o__Anaerolineales;f__DRKV01;g__JAGUYX01;s__Unclassified	1774	2418	645	K00001	adh	alcohol dehydrogenase [EC:1.1.1.1]	Metabolism of xenobiotics by cytochrome P450;Naphthalene degradation;Metabolic pathways;Degradation of aromatic compounds;Microbial metabolism in diverse environments;Fatty acid degradation;Chloroalkane and chloroalkene degradation;Tyrosine metabolism;Pyruvate metabolism;Drug metabolism - cytochrome P450;Glycolysis / Gluconeogenesis;Biosynthesis of secondary metabolites;Retinol metabolism
MAG167_gene2482	M3_1_1_k97_936429_ORF2456	MAG167	d__Bacteria;p__Bacteroidota;c__Bacteroidia;o__Flavobacteriales;f__Flavobacteriaceae;g__Robiginitalea;s__Unclassified	4027	2987	1041	K00001	adh	alcohol dehydrogenase [EC:1.1.1.1]	Metabolism of xenobiotics by cytochrome P450;Naphthalene degradation;Metabolic pathways;Degradation of aromatic compounds;Microbial metabolism in diverse environments;Fatty acid degradation;Chloroalkane and chloroalkene degradation;Tyrosine metabolism;Pyruvate metabolism;Drug metabolism - cytochrome P450;Glycolysis / Gluconeogenesis;Biosynthesis of secondary metabolites;Retinol metabolism
MAG168_gene1705	M2_2_3_k97_1613869_ORF1697	MAG168	d__Bacteria;p__Pseudomonadota;c__Alphaproteobacteria;o__Rhizobiales;f__Rhizobiaceae;g__Salaquimonas;s__Unclassified	2570	3715	1146	K00001	adh	alcohol dehydrogenase [EC:1.1.1.1]	Metabolism of xenobiotics by cytochrome P450;Naphthalene degradation;Metabolic pathways;Degradation of aromatic compounds;Microbial metabolism in diverse environments;Fatty acid degradation;Chloroalkane and chloroalkene degradation;Tyrosine metabolism;Pyruvate metabolism;Drug metabolism - cytochrome P450;Glycolysis / Gluconeogenesis;Biosynthesis of secondary metabolites;Retinol metabolism
MAG168_gene2132	M2_2_3_k97_1568519_ORF2118	MAG168	d__Bacteria;p__Pseudomonadota;c__Alphaproteobacteria;o__Rhizobiales;f__Rhizobiaceae;g__Salaquimonas;s__Unclassified	1102	2169	1068	K00001	adh	alcohol dehydrogenase [EC:1.1.1.1]	Metabolism of xenobiotics by cytochrome P450;Naphthalene degradation;Metabolic pathways;Degradation of aromatic compounds;Microbial metabolism in diverse environments;Fatty acid degradation;Chloroalkane and chloroalkene degradation;Tyrosine metabolism;Pyruvate metabolism;Drug metabolism - cytochrome P450;Glycolysis / Gluconeogenesis;Biosynthesis of secondary metabolites;Retinol metabolism
MAG168_gene2195	M2_2_3_k97_1609176_ORF2179	MAG168	d__Bacteria;p__Pseudomonadota;c__Alphaproteobacteria;o__Rhizobiales;f__Rhizobiaceae;g__Salaquimonas;s__Unclassified	1	903	903	K00001	adh	alcohol dehydrogenase [EC:1.1.1.1]	Metabolism of xenobiotics by cytochrome P450;Naphthalene degradation;Metabolic pathways;Degradation of aromatic compounds;Microbial metabolism in diverse environments;Fatty acid degradation;Chloroalkane and chloroalkene degradation;Tyrosine metabolism;Pyruvate metabolism;Drug metabolism - cytochrome P450;Glycolysis / Gluconeogenesis;Biosynthesis of secondary metabolites;Retinol metabolism
MAG168_gene2526	M2_2_3_k97_1235585_ORF2508	MAG168	d__Bacteria;p__Pseudomonadota;c__Alphaproteobacteria;o__Rhizobiales;f__Rhizobiaceae;g__Salaquimonas;s__Unclassified	786	1817	1032	K00001	adh	alcohol dehydrogenase [EC:1.1.1.1]	Metabolism of xenobiotics by cytochrome P450;Naphthalene degradation;Metabolic pathways;Degradation of aromatic compounds;Microbial metabolism in diverse environments;Fatty acid degradation;Chloroalkane and chloroalkene degradation;Tyrosine metabolism;Pyruvate metabolism;Drug metabolism - cytochrome P450;Glycolysis / Gluconeogenesis;Biosynthesis of secondary metabolites;Retinol metabolism
MAG168_gene2781	M2_2_3_k97_207919_ORF2762	MAG168	d__Bacteria;p__Pseudomonadota;c__Alphaproteobacteria;o__Rhizobiales;f__Rhizobiaceae;g__Salaquimonas;s__Unclassified	419	1486	1068	K00001	adh	alcohol dehydrogenase [EC:1.1.1.1]	Metabolism of xenobiotics by cytochrome P450;Naphthalene degradation;Metabolic pathways;Degradation of aromatic compounds;Microbial metabolism in diverse environments;Fatty acid degradation;Chloroalkane and chloroalkene degradation;Tyrosine metabolism;Pyruvate metabolism;Drug metabolism - cytochrome P450;Glycolysis / Gluconeogenesis;Biosynthesis of secondary metabolites;Retinol metabolism
MAG169_gene0736	M2_2_3_k97_1140074_ORF730	MAG169	d__Bacteria;p__Pseudomonadota;c__Alphaproteobacteria;o__Rhizobiales;f__Aestuariivirgaceae;g__Anderseniella;s__Unclassified	2528	1341	1188	K00001	adh	alcohol dehydrogenase [EC:1.1.1.1]	Metabolism of xenobiotics by cytochrome P450;Naphthalene degradation;Metabolic pathways;Degradation of aromatic compounds;Microbial metabolism in diverse environments;Fatty acid degradation;Chloroalkane and chloroalkene degradation;Tyrosine metabolism;Pyruvate metabolism;Drug metabolism - cytochrome P450;Glycolysis / Gluconeogenesis;Biosynthesis of secondary metabolites;Retinol metabolism
MAG169_gene1178	M2_2_3_k97_2145512_ORF1167	MAG169	d__Bacteria;p__Pseudomonadota;c__Alphaproteobacteria;o__Rhizobiales;f__Aestuariivirgaceae;g__Anderseniella;s__Unclassified	1427	2515	1089	K00001	adh	alcohol dehydrogenase [EC:1.1.1.1]	Metabolism of xenobiotics by cytochrome P450;Naphthalene degradation;Metabolic pathways;Degradation of aromatic compounds;Microbial metabolism in diverse environments;Fatty acid degradation;Chloroalkane and chloroalkene degradation;Tyrosine metabolism;Pyruvate metabolism;Drug metabolism - cytochrome P450;Glycolysis / Gluconeogenesis;Biosynthesis of secondary metabolites;Retinol metabolism
MAG169_gene1677	M2_2_3_k97_1776467_ORF1662	MAG169	d__Bacteria;p__Pseudomonadota;c__Alphaproteobacteria;o__Rhizobiales;f__Aestuariivirgaceae;g__Anderseniella;s__Unclassified	1739	2329	591	K00001	adh	alcohol dehydrogenase [EC:1.1.1.1]	Metabolism of xenobiotics by cytochrome P450;Naphthalene degradation;Metabolic pathways;Degradation of aromatic compounds;Microbial metabolism in diverse environments;Fatty acid degradation;Chloroalkane and chloroalkene degradation;Tyrosine metabolism;Pyruvate metabolism;Drug metabolism - cytochrome P450;Glycolysis / Gluconeogenesis;Biosynthesis of secondary metabolites;Retinol metabolism
MAG170_gene2413	M1_1_2_k97_561556_ORF2384	MAG170	d__Bacteria;p__Pseudomonadota;c__Alphaproteobacteria;o__Rhizobiales;f__Methyloligellaceae;g__Methyloceanibacter;s__Unclassified	1360	338	1023	K00001	adh	alcohol dehydrogenase [EC:1.1.1.1]	Metabolism of xenobiotics by cytochrome P450;Naphthalene degradation;Metabolic pathways;Degradation of aromatic compounds;Microbial metabolism in diverse environments;Fatty acid degradation;Chloroalkane and chloroalkene degradation;Tyrosine metabolism;Pyruvate metabolism;Drug metabolism - cytochrome P450;Glycolysis / Gluconeogenesis;Biosynthesis of secondary metabolites;Retinol metabolism
MAG171_gene0383	FG_WR_1_k97_586716_ORF380	MAG171	d__Bacteria;p__Chloroflexota;c__Anaerolineae;o__Promineofilales;f__Promineofilaceae;g__JAKEFB01;s__Unclassified	759	1712	954	K00001	adh	alcohol dehydrogenase [EC:1.1.1.1]	Metabolism of xenobiotics by cytochrome P450;Naphthalene degradation;Metabolic pathways;Degradation of aromatic compounds;Microbial metabolism in diverse environments;Fatty acid degradation;Chloroalkane and chloroalkene degradation;Tyrosine metabolism;Pyruvate metabolism;Drug metabolism - cytochrome P450;Glycolysis / Gluconeogenesis;Biosynthesis of secondary metabolites;Retinol metabolism
MAG173_gene0344	M2_2_2_k97_1252081_ORF341	MAG173	d__Bacteria;p__Actinomycetota;c__Actinomycetia;o__Actinomycetales;f__Dermatophilaceae;g__Phycicoccus;s__Unclassified	2953	3921	969	K00001	adh	alcohol dehydrogenase [EC:1.1.1.1]	Metabolism of xenobiotics by cytochrome P450;Naphthalene degradation;Metabolic pathways;Degradation of aromatic compounds;Microbial metabolism in diverse environments;Fatty acid degradation;Chloroalkane and chloroalkene degradation;Tyrosine metabolism;Pyruvate metabolism;Drug metabolism - cytochrome P450;Glycolysis / Gluconeogenesis;Biosynthesis of secondary metabolites;Retinol metabolism
MAG173_gene0456	M2_2_2_k97_1419953_ORF453	MAG173	d__Bacteria;p__Actinomycetota;c__Actinomycetia;o__Actinomycetales;f__Dermatophilaceae;g__Phycicoccus;s__Unclassified	2	952	951	K00001	adh	alcohol dehydrogenase [EC:1.1.1.1]	Metabolism of xenobiotics by cytochrome P450;Naphthalene degradation;Metabolic pathways;Degradation of aromatic compounds;Microbial metabolism in diverse environments;Fatty acid degradation;Chloroalkane and chloroalkene degradation;Tyrosine metabolism;Pyruvate metabolism;Drug metabolism - cytochrome P450;Glycolysis / Gluconeogenesis;Biosynthesis of secondary metabolites;Retinol metabolism
MAG173_gene1168	M2_2_2_k97_36683_ORF1159	MAG173	d__Bacteria;p__Actinomycetota;c__Actinomycetia;o__Actinomycetales;f__Dermatophilaceae;g__Phycicoccus;s__Unclassified	1651	617	1035	K00001	adh	alcohol dehydrogenase [EC:1.1.1.1]	Metabolism of xenobiotics by cytochrome P450;Naphthalene degradation;Metabolic pathways;Degradation of aromatic compounds;Microbial metabolism in diverse environments;Fatty acid degradation;Chloroalkane and chloroalkene degradation;Tyrosine metabolism;Pyruvate metabolism;Drug metabolism - cytochrome P450;Glycolysis / Gluconeogenesis;Biosynthesis of secondary metabolites;Retinol metabolism
MAG173_gene1306	M2_2_2_k97_1134558_ORF1296	MAG173	d__Bacteria;p__Actinomycetota;c__Actinomycetia;o__Actinomycetales;f__Dermatophilaceae;g__Phycicoccus;s__Unclassified	4720	3683	1038	K00001	adh	alcohol dehydrogenase [EC:1.1.1.1]	Metabolism of xenobiotics by cytochrome P450;Naphthalene degradation;Metabolic pathways;Degradation of aromatic compounds;Microbial metabolism in diverse environments;Fatty acid degradation;Chloroalkane and chloroalkene degradation;Tyrosine metabolism;Pyruvate metabolism;Drug metabolism - cytochrome P450;Glycolysis / Gluconeogenesis;Biosynthesis of secondary metabolites;Retinol metabolism
MAG173_gene1429	M2_2_2_k97_1272938_ORF1415	MAG173	d__Bacteria;p__Actinomycetota;c__Actinomycetia;o__Actinomycetales;f__Dermatophilaceae;g__Phycicoccus;s__Unclassified	2163	3140	978	K00001	adh	alcohol dehydrogenase [EC:1.1.1.1]	Metabolism of xenobiotics by cytochrome P450;Naphthalene degradation;Metabolic pathways;Degradation of aromatic compounds;Microbial metabolism in diverse environments;Fatty acid degradation;Chloroalkane and chloroalkene degradation;Tyrosine metabolism;Pyruvate metabolism;Drug metabolism - cytochrome P450;Glycolysis / Gluconeogenesis;Biosynthesis of secondary metabolites;Retinol metabolism
MAG174_gene1938	M2_2_1_k97_652299_ORF1922	MAG174	d__Bacteria;p__Fermentibacterota;c__Fermentibacteria;o__Fermentibacterales;f__Fermentibacteraceae;g__Aegiribacteria;s__Unclassified	972	1946	975	K00001	adh	alcohol dehydrogenase [EC:1.1.1.1]	Metabolism of xenobiotics by cytochrome P450;Naphthalene degradation;Metabolic pathways;Degradation of aromatic compounds;Microbial metabolism in diverse environments;Fatty acid degradation;Chloroalkane and chloroalkene degradation;Tyrosine metabolism;Pyruvate metabolism;Drug metabolism - cytochrome P450;Glycolysis / Gluconeogenesis;Biosynthesis of secondary metabolites;Retinol metabolism
MAG174_gene2261	M2_2_1_k97_1056005_ORF2240	MAG174	d__Bacteria;p__Fermentibacterota;c__Fermentibacteria;o__Fermentibacterales;f__Fermentibacteraceae;g__Aegiribacteria;s__Unclassified	1617	643	975	K00001	adh	alcohol dehydrogenase [EC:1.1.1.1]	Metabolism of xenobiotics by cytochrome P450;Naphthalene degradation;Metabolic pathways;Degradation of aromatic compounds;Microbial metabolism in diverse environments;Fatty acid degradation;Chloroalkane and chloroalkene degradation;Tyrosine metabolism;Pyruvate metabolism;Drug metabolism - cytochrome P450;Glycolysis / Gluconeogenesis;Biosynthesis of secondary metabolites;Retinol metabolism
MAG176_gene0707	CPT_SW_2_k97_624995_ORF703	MAG176	d__Archaea;p__Thermoproteota;c__Nitrososphaeria;o__Nitrososphaerales;f__Nitrososphaeraceae;g__TH1177;s__Unclassified	4719	3670	1050	K00001	adh	alcohol dehydrogenase [EC:1.1.1.1]	Metabolism of xenobiotics by cytochrome P450;Naphthalene degradation;Metabolic pathways;Degradation of aromatic compounds;Microbial metabolism in diverse environments;Fatty acid degradation;Chloroalkane and chloroalkene degradation;Tyrosine metabolism;Pyruvate metabolism;Drug metabolism - cytochrome P450;Glycolysis / Gluconeogenesis;Biosynthesis of secondary metabolites;Retinol metabolism
MAG176_gene0748	CPT_SW_2_k97_370614_ORF743	MAG176	d__Archaea;p__Thermoproteota;c__Nitrososphaeria;o__Nitrososphaerales;f__Nitrososphaeraceae;g__TH1177;s__Unclassified	4204	4788	585	K00001	adh	alcohol dehydrogenase [EC:1.1.1.1]	Metabolism of xenobiotics by cytochrome P450;Naphthalene degradation;Metabolic pathways;Degradation of aromatic compounds;Microbial metabolism in diverse environments;Fatty acid degradation;Chloroalkane and chloroalkene degradation;Tyrosine metabolism;Pyruvate metabolism;Drug metabolism - cytochrome P450;Glycolysis / Gluconeogenesis;Biosynthesis of secondary metabolites;Retinol metabolism
MAG176_gene0941	CPT_SW_2_k97_1403427_ORF936	MAG176	d__Archaea;p__Thermoproteota;c__Nitrososphaeria;o__Nitrososphaerales;f__Nitrososphaeraceae;g__TH1177;s__Unclassified	3909	4208	300	K00001	adh	alcohol dehydrogenase [EC:1.1.1.1]	Metabolism of xenobiotics by cytochrome P450;Naphthalene degradation;Metabolic pathways;Degradation of aromatic compounds;Microbial metabolism in diverse environments;Fatty acid degradation;Chloroalkane and chloroalkene degradation;Tyrosine metabolism;Pyruvate metabolism;Drug metabolism - cytochrome P450;Glycolysis / Gluconeogenesis;Biosynthesis of secondary metabolites;Retinol metabolism
MAG176_gene1968	CPT_SW_2_k97_1340776_ORF1953	MAG176	d__Archaea;p__Thermoproteota;c__Nitrososphaeria;o__Nitrososphaerales;f__Nitrososphaeraceae;g__TH1177;s__Unclassified	2197	1595	603	K00001	adh	alcohol dehydrogenase [EC:1.1.1.1]	Metabolism of xenobiotics by cytochrome P450;Naphthalene degradation;Metabolic pathways;Degradation of aromatic compounds;Microbial metabolism in diverse environments;Fatty acid degradation;Chloroalkane and chloroalkene degradation;Tyrosine metabolism;Pyruvate metabolism;Drug metabolism - cytochrome P450;Glycolysis / Gluconeogenesis;Biosynthesis of secondary metabolites;Retinol metabolism
MAG18_gene2133	FG_SC_1_k97_571402_ORF2114	MAG18	d__Bacteria;p__Chloroflexota;c__Anaerolineae;o__Promineofilales;f__Promineofilaceae;g__JAKEFB01;s__Unclassified	2257	2862	606	K00001	adh	alcohol dehydrogenase [EC:1.1.1.1]	Metabolism of xenobiotics by cytochrome P450;Naphthalene degradation;Metabolic pathways;Degradation of aromatic compounds;Microbial metabolism in diverse environments;Fatty acid degradation;Chloroalkane and chloroalkene degradation;Tyrosine metabolism;Pyruvate metabolism;Drug metabolism - cytochrome P450;Glycolysis / Gluconeogenesis;Biosynthesis of secondary metabolites;Retinol metabolism
MAG18_gene2346	FG_SC_1_k97_1160369_ORF2324	MAG18	d__Bacteria;p__Chloroflexota;c__Anaerolineae;o__Promineofilales;f__Promineofilaceae;g__JAKEFB01;s__Unclassified	275	1243	969	K00001	adh	alcohol dehydrogenase [EC:1.1.1.1]	Metabolism of xenobiotics by cytochrome P450;Naphthalene degradation;Metabolic pathways;Degradation of aromatic compounds;Microbial metabolism in diverse environments;Fatty acid degradation;Chloroalkane and chloroalkene degradation;Tyrosine metabolism;Pyruvate metabolism;Drug metabolism - cytochrome P450;Glycolysis / Gluconeogenesis;Biosynthesis of secondary metabolites;Retinol metabolism
MAG182_gene1826	M3_1_3_k97_391653_ORF1812	MAG182	d__Bacteria;p__Actinomycetota;c__Actinomycetia;o__Nanopelagicales;f__GCA-2699445;g__Unclassified;s__Unclassified	762	1	762	K00001	adh	alcohol dehydrogenase [EC:1.1.1.1]	Metabolism of xenobiotics by cytochrome P450;Naphthalene degradation;Metabolic pathways;Degradation of aromatic compounds;Microbial metabolism in diverse environments;Fatty acid degradation;Chloroalkane and chloroalkene degradation;Tyrosine metabolism;Pyruvate metabolism;Drug metabolism - cytochrome P450;Glycolysis / Gluconeogenesis;Biosynthesis of secondary metabolites;Retinol metabolism
MAG184_gene1446	M2_2_1_k97_1674705_ORF1420	MAG184	d__Bacteria;p__Bacteroidota;c__Bacteroidia;o__Bacteroidales;f__VadinHA17;g__SR-FBR-E99;s__Unclassified	11017	9845	1173	K00001	adh	alcohol dehydrogenase [EC:1.1.1.1]	Metabolism of xenobiotics by cytochrome P450;Naphthalene degradation;Metabolic pathways;Degradation of aromatic compounds;Microbial metabolism in diverse environments;Fatty acid degradation;Chloroalkane and chloroalkene degradation;Tyrosine metabolism;Pyruvate metabolism;Drug metabolism - cytochrome P450;Glycolysis / Gluconeogenesis;Biosynthesis of secondary metabolites;Retinol metabolism
MAG185_gene1376	M1_2_3_k97_856974_ORF1370	MAG185	d__Bacteria;p__Pseudomonadota;c__Alphaproteobacteria;o__Kiloniellales;f__JAKSDN01;g__Unclassified;s__Unclassified	35	1096	1062	K00001	adh	alcohol dehydrogenase [EC:1.1.1.1]	Metabolism of xenobiotics by cytochrome P450;Naphthalene degradation;Metabolic pathways;Degradation of aromatic compounds;Microbial metabolism in diverse environments;Fatty acid degradation;Chloroalkane and chloroalkene degradation;Tyrosine metabolism;Pyruvate metabolism;Drug metabolism - cytochrome P450;Glycolysis / Gluconeogenesis;Biosynthesis of secondary metabolites;Retinol metabolism
MAG185_gene1576	M1_2_3_k97_21430_ORF1570	MAG185	d__Bacteria;p__Pseudomonadota;c__Alphaproteobacteria;o__Kiloniellales;f__JAKSDN01;g__Unclassified;s__Unclassified	383	1555	1173	K00001	adh	alcohol dehydrogenase [EC:1.1.1.1]	Metabolism of xenobiotics by cytochrome P450;Naphthalene degradation;Metabolic pathways;Degradation of aromatic compounds;Microbial metabolism in diverse environments;Fatty acid degradation;Chloroalkane and chloroalkene degradation;Tyrosine metabolism;Pyruvate metabolism;Drug metabolism - cytochrome P450;Glycolysis / Gluconeogenesis;Biosynthesis of secondary metabolites;Retinol metabolism
MAG185_gene1722	M1_2_3_k97_775931_ORF1715	MAG185	d__Bacteria;p__Pseudomonadota;c__Alphaproteobacteria;o__Kiloniellales;f__JAKSDN01;g__Unclassified;s__Unclassified	2	127	126	K00001	adh	alcohol dehydrogenase [EC:1.1.1.1]	Metabolism of xenobiotics by cytochrome P450;Naphthalene degradation;Metabolic pathways;Degradation of aromatic compounds;Microbial metabolism in diverse environments;Fatty acid degradation;Chloroalkane and chloroalkene degradation;Tyrosine metabolism;Pyruvate metabolism;Drug metabolism - cytochrome P450;Glycolysis / Gluconeogenesis;Biosynthesis of secondary metabolites;Retinol metabolism
MAG185_gene1880	M1_2_3_k97_818173_ORF1873	MAG185	d__Bacteria;p__Pseudomonadota;c__Alphaproteobacteria;o__Kiloniellales;f__JAKSDN01;g__Unclassified;s__Unclassified	2042	2620	579	K00001	adh	alcohol dehydrogenase [EC:1.1.1.1]	Metabolism of xenobiotics by cytochrome P450;Naphthalene degradation;Metabolic pathways;Degradation of aromatic compounds;Microbial metabolism in diverse environments;Fatty acid degradation;Chloroalkane and chloroalkene degradation;Tyrosine metabolism;Pyruvate metabolism;Drug metabolism - cytochrome P450;Glycolysis / Gluconeogenesis;Biosynthesis of secondary metabolites;Retinol metabolism
MAG186_gene0795	M2_1_3_k97_689384_ORF793	MAG186	d__Bacteria;p__Pseudomonadota;c__Alphaproteobacteria;o__Rhizobiales;f__Rhizobiaceae;g__Salaquimonas;s__Unclassified	478	1548	1071	K00001	adh	alcohol dehydrogenase [EC:1.1.1.1]	Metabolism of xenobiotics by cytochrome P450;Naphthalene degradation;Metabolic pathways;Degradation of aromatic compounds;Microbial metabolism in diverse environments;Fatty acid degradation;Chloroalkane and chloroalkene degradation;Tyrosine metabolism;Pyruvate metabolism;Drug metabolism - cytochrome P450;Glycolysis / Gluconeogenesis;Biosynthesis of secondary metabolites;Retinol metabolism
MAG186_gene1272	M2_1_3_k97_1423900_ORF1266	MAG186	d__Bacteria;p__Pseudomonadota;c__Alphaproteobacteria;o__Rhizobiales;f__Rhizobiaceae;g__Salaquimonas;s__Unclassified	2226	3263	1038	K00001	adh	alcohol dehydrogenase [EC:1.1.1.1]	Metabolism of xenobiotics by cytochrome P450;Naphthalene degradation;Metabolic pathways;Degradation of aromatic compounds;Microbial metabolism in diverse environments;Fatty acid degradation;Chloroalkane and chloroalkene degradation;Tyrosine metabolism;Pyruvate metabolism;Drug metabolism - cytochrome P450;Glycolysis / Gluconeogenesis;Biosynthesis of secondary metabolites;Retinol metabolism
MAG186_gene2227	M2_1_3_k97_36869_ORF2213	MAG186	d__Bacteria;p__Pseudomonadota;c__Alphaproteobacteria;o__Rhizobiales;f__Rhizobiaceae;g__Salaquimonas;s__Unclassified	2348	1317	1032	K00001	adh	alcohol dehydrogenase [EC:1.1.1.1]	Metabolism of xenobiotics by cytochrome P450;Naphthalene degradation;Metabolic pathways;Degradation of aromatic compounds;Microbial metabolism in diverse environments;Fatty acid degradation;Chloroalkane and chloroalkene degradation;Tyrosine metabolism;Pyruvate metabolism;Drug metabolism - cytochrome P450;Glycolysis / Gluconeogenesis;Biosynthesis of secondary metabolites;Retinol metabolism
MAG186_gene2418	M2_1_3_k97_1612700_ORF2401	MAG186	d__Bacteria;p__Pseudomonadota;c__Alphaproteobacteria;o__Rhizobiales;f__Rhizobiaceae;g__Salaquimonas;s__Unclassified	393	1	393	K00001	adh	alcohol dehydrogenase [EC:1.1.1.1]	Metabolism of xenobiotics by cytochrome P450;Naphthalene degradation;Metabolic pathways;Degradation of aromatic compounds;Microbial metabolism in diverse environments;Fatty acid degradation;Chloroalkane and chloroalkene degradation;Tyrosine metabolism;Pyruvate metabolism;Drug metabolism - cytochrome P450;Glycolysis / Gluconeogenesis;Biosynthesis of secondary metabolites;Retinol metabolism
MAG186_gene2701	M2_1_3_k97_890263_ORF2679	MAG186	d__Bacteria;p__Pseudomonadota;c__Alphaproteobacteria;o__Rhizobiales;f__Rhizobiaceae;g__Salaquimonas;s__Unclassified	2178	1504	675	K00001	adh	alcohol dehydrogenase [EC:1.1.1.1]	Metabolism of xenobiotics by cytochrome P450;Naphthalene degradation;Metabolic pathways;Degradation of aromatic compounds;Microbial metabolism in diverse environments;Fatty acid degradation;Chloroalkane and chloroalkene degradation;Tyrosine metabolism;Pyruvate metabolism;Drug metabolism - cytochrome P450;Glycolysis / Gluconeogenesis;Biosynthesis of secondary metabolites;Retinol metabolism
MAG187_gene2298	M3_2_3_k97_530700_ORF2287	MAG187	d__Bacteria;p__Planctomycetota;c__Planctomycetia;o__Pirellulales;f__Pirellulaceae;g__GCA-2723275;s__Unclassified	1495	455	1041	K00001	adh	alcohol dehydrogenase [EC:1.1.1.1]	Metabolism of xenobiotics by cytochrome P450;Naphthalene degradation;Metabolic pathways;Degradation of aromatic compounds;Microbial metabolism in diverse environments;Fatty acid degradation;Chloroalkane and chloroalkene degradation;Tyrosine metabolism;Pyruvate metabolism;Drug metabolism - cytochrome P450;Glycolysis / Gluconeogenesis;Biosynthesis of secondary metabolites;Retinol metabolism
MAG189_gene2754	CPT_SW_1_k97_1269255_ORF2734	MAG189	d__Bacteria;p__Chloroflexota;c__Anaerolineae;o__Anaerolineales;f__UBA4823;g__DSOS01;s__Unclassified	108	1061	954	K00001	adh	alcohol dehydrogenase [EC:1.1.1.1]	Metabolism of xenobiotics by cytochrome P450;Naphthalene degradation;Metabolic pathways;Degradation of aromatic compounds;Microbial metabolism in diverse environments;Fatty acid degradation;Chloroalkane and chloroalkene degradation;Tyrosine metabolism;Pyruvate metabolism;Drug metabolism - cytochrome P450;Glycolysis / Gluconeogenesis;Biosynthesis of secondary metabolites;Retinol metabolism
MAG189_gene3467	CPT_SW_1_k97_443836_ORF3444	MAG189	d__Bacteria;p__Chloroflexota;c__Anaerolineae;o__Anaerolineales;f__UBA4823;g__DSOS01;s__Unclassified	1	240	240	K00001	adh	alcohol dehydrogenase [EC:1.1.1.1]	Metabolism of xenobiotics by cytochrome P450;Naphthalene degradation;Metabolic pathways;Degradation of aromatic compounds;Microbial metabolism in diverse environments;Fatty acid degradation;Chloroalkane and chloroalkene degradation;Tyrosine metabolism;Pyruvate metabolism;Drug metabolism - cytochrome P450;Glycolysis / Gluconeogenesis;Biosynthesis of secondary metabolites;Retinol metabolism
MAG19_gene0188	M2_1_2_k97_980680_ORF186	MAG19	d__Bacteria;p__Pseudomonadota;c__Alphaproteobacteria;o__Rhizobiales;f__Rhizobiaceae;g__Salaquimonas;s__Unclassified	2677	3708	1032	K00001	adh	alcohol dehydrogenase [EC:1.1.1.1]	Metabolism of xenobiotics by cytochrome P450;Naphthalene degradation;Metabolic pathways;Degradation of aromatic compounds;Microbial metabolism in diverse environments;Fatty acid degradation;Chloroalkane and chloroalkene degradation;Tyrosine metabolism;Pyruvate metabolism;Drug metabolism - cytochrome P450;Glycolysis / Gluconeogenesis;Biosynthesis of secondary metabolites;Retinol metabolism
MAG19_gene1230	M2_1_2_k97_459309_ORF1224	MAG19	d__Bacteria;p__Pseudomonadota;c__Alphaproteobacteria;o__Rhizobiales;f__Rhizobiaceae;g__Salaquimonas;s__Unclassified	8070	7024	1047	K00001	adh	alcohol dehydrogenase [EC:1.1.1.1]	Metabolism of xenobiotics by cytochrome P450;Naphthalene degradation;Metabolic pathways;Degradation of aromatic compounds;Microbial metabolism in diverse environments;Fatty acid degradation;Chloroalkane and chloroalkene degradation;Tyrosine metabolism;Pyruvate metabolism;Drug metabolism - cytochrome P450;Glycolysis / Gluconeogenesis;Biosynthesis of secondary metabolites;Retinol metabolism
MAG19_gene2236	M2_1_2_k97_254539_ORF2223	MAG19	d__Bacteria;p__Pseudomonadota;c__Alphaproteobacteria;o__Rhizobiales;f__Rhizobiaceae;g__Salaquimonas;s__Unclassified	2905	1868	1038	K00001	adh	alcohol dehydrogenase [EC:1.1.1.1]	Metabolism of xenobiotics by cytochrome P450;Naphthalene degradation;Metabolic pathways;Degradation of aromatic compounds;Microbial metabolism in diverse environments;Fatty acid degradation;Chloroalkane and chloroalkene degradation;Tyrosine metabolism;Pyruvate metabolism;Drug metabolism - cytochrome P450;Glycolysis / Gluconeogenesis;Biosynthesis of secondary metabolites;Retinol metabolism
MAG191_gene0427	M2_2_1_k97_204311_ORF423	MAG191	d__Bacteria;p__Chloroflexota;c__Anaerolineae;o__Anaerolineales;f__UBA11858;g__B10-G9;s__Unclassified	5609	6601	993	K00001	adh	alcohol dehydrogenase [EC:1.1.1.1]	Metabolism of xenobiotics by cytochrome P450;Naphthalene degradation;Metabolic pathways;Degradation of aromatic compounds;Microbial metabolism in diverse environments;Fatty acid degradation;Chloroalkane and chloroalkene degradation;Tyrosine metabolism;Pyruvate metabolism;Drug metabolism - cytochrome P450;Glycolysis / Gluconeogenesis;Biosynthesis of secondary metabolites;Retinol metabolism
MAG191_gene2138	M2_2_1_k97_72111_ORF2117	MAG191	d__Bacteria;p__Chloroflexota;c__Anaerolineae;o__Anaerolineales;f__UBA11858;g__B10-G9;s__Unclassified	849	1	849	K00001	adh	alcohol dehydrogenase [EC:1.1.1.1]	Metabolism of xenobiotics by cytochrome P450;Naphthalene degradation;Metabolic pathways;Degradation of aromatic compounds;Microbial metabolism in diverse environments;Fatty acid degradation;Chloroalkane and chloroalkene degradation;Tyrosine metabolism;Pyruvate metabolism;Drug metabolism - cytochrome P450;Glycolysis / Gluconeogenesis;Biosynthesis of secondary metabolites;Retinol metabolism
MAG192_gene2539	M1_1_2_k97_432185_ORF2529	MAG192	d__Bacteria;p__Bacteroidota;c__Bacteroidia;o__Flavobacteriales;f__Flavobacteriaceae;g__Robiginitalea;s__Unclassified	784	1764	981	K00001	adh	alcohol dehydrogenase [EC:1.1.1.1]	Metabolism of xenobiotics by cytochrome P450;Naphthalene degradation;Metabolic pathways;Degradation of aromatic compounds;Microbial metabolism in diverse environments;Fatty acid degradation;Chloroalkane and chloroalkene degradation;Tyrosine metabolism;Pyruvate metabolism;Drug metabolism - cytochrome P450;Glycolysis / Gluconeogenesis;Biosynthesis of secondary metabolites;Retinol metabolism
MAG194_gene1721	M2_1_1_k97_45566_ORF1709	MAG194	d__Bacteria;p__Desulfobacterota;c__Desulfobulbia;o__Desulfobulbales;f__Desulfocapsaceae;g__JABDQA01;s__Unclassified	819	1859	1041	K00001	adh	alcohol dehydrogenase [EC:1.1.1.1]	Metabolism of xenobiotics by cytochrome P450;Naphthalene degradation;Metabolic pathways;Degradation of aromatic compounds;Microbial metabolism in diverse environments;Fatty acid degradation;Chloroalkane and chloroalkene degradation;Tyrosine metabolism;Pyruvate metabolism;Drug metabolism - cytochrome P450;Glycolysis / Gluconeogenesis;Biosynthesis of secondary metabolites;Retinol metabolism
MAG194_gene1796	M2_1_1_k97_1851908_ORF1784	MAG194	d__Bacteria;p__Desulfobacterota;c__Desulfobulbia;o__Desulfobulbales;f__Desulfocapsaceae;g__JABDQA01;s__Unclassified	1904	1191	714	K00001	adh	alcohol dehydrogenase [EC:1.1.1.1]	Metabolism of xenobiotics by cytochrome P450;Naphthalene degradation;Metabolic pathways;Degradation of aromatic compounds;Microbial metabolism in diverse environments;Fatty acid degradation;Chloroalkane and chloroalkene degradation;Tyrosine metabolism;Pyruvate metabolism;Drug metabolism - cytochrome P450;Glycolysis / Gluconeogenesis;Biosynthesis of secondary metabolites;Retinol metabolism
MAG195_gene1467	M2_2_2_k97_289284_ORF1460	MAG195	d__Bacteria;p__Desulfobacterota;c__Desulfobacteria;o__Desulfobacterales;f__B30-G6;g__Unclassified;s__Unclassified	1278	265	1014	K00001	adh	alcohol dehydrogenase [EC:1.1.1.1]	Metabolism of xenobiotics by cytochrome P450;Naphthalene degradation;Metabolic pathways;Degradation of aromatic compounds;Microbial metabolism in diverse environments;Fatty acid degradation;Chloroalkane and chloroalkene degradation;Tyrosine metabolism;Pyruvate metabolism;Drug metabolism - cytochrome P450;Glycolysis / Gluconeogenesis;Biosynthesis of secondary metabolites;Retinol metabolism
MAG195_gene2725	M2_2_2_k97_1799745_ORF2705	MAG195	d__Bacteria;p__Desulfobacterota;c__Desulfobacteria;o__Desulfobacterales;f__B30-G6;g__Unclassified;s__Unclassified	4271	5269	999	K00001	adh	alcohol dehydrogenase [EC:1.1.1.1]	Metabolism of xenobiotics by cytochrome P450;Naphthalene degradation;Metabolic pathways;Degradation of aromatic compounds;Microbial metabolism in diverse environments;Fatty acid degradation;Chloroalkane and chloroalkene degradation;Tyrosine metabolism;Pyruvate metabolism;Drug metabolism - cytochrome P450;Glycolysis / Gluconeogenesis;Biosynthesis of secondary metabolites;Retinol metabolism
MAG195_gene2808	M2_2_2_k97_1126506_ORF2787	MAG195	d__Bacteria;p__Desulfobacterota;c__Desulfobacteria;o__Desulfobacterales;f__B30-G6;g__Unclassified;s__Unclassified	4031	2985	1047	K00001	adh	alcohol dehydrogenase [EC:1.1.1.1]	Metabolism of xenobiotics by cytochrome P450;Naphthalene degradation;Metabolic pathways;Degradation of aromatic compounds;Microbial metabolism in diverse environments;Fatty acid degradation;Chloroalkane and chloroalkene degradation;Tyrosine metabolism;Pyruvate metabolism;Drug metabolism - cytochrome P450;Glycolysis / Gluconeogenesis;Biosynthesis of secondary metabolites;Retinol metabolism
MAG195_gene2834	M2_2_2_k97_445510_ORF2813	MAG195	d__Bacteria;p__Desulfobacterota;c__Desulfobacteria;o__Desulfobacterales;f__B30-G6;g__Unclassified;s__Unclassified	465	1592	1128	K00001	adh	alcohol dehydrogenase [EC:1.1.1.1]	Metabolism of xenobiotics by cytochrome P450;Naphthalene degradation;Metabolic pathways;Degradation of aromatic compounds;Microbial metabolism in diverse environments;Fatty acid degradation;Chloroalkane and chloroalkene degradation;Tyrosine metabolism;Pyruvate metabolism;Drug metabolism - cytochrome P450;Glycolysis / Gluconeogenesis;Biosynthesis of secondary metabolites;Retinol metabolism
MAG195_gene4105	M2_2_2_k97_386704_ORF4076	MAG195	d__Bacteria;p__Desulfobacterota;c__Desulfobacteria;o__Desulfobacterales;f__B30-G6;g__Unclassified;s__Unclassified	291	1298	1008	K00001	adh	alcohol dehydrogenase [EC:1.1.1.1]	Metabolism of xenobiotics by cytochrome P450;Naphthalene degradation;Metabolic pathways;Degradation of aromatic compounds;Microbial metabolism in diverse environments;Fatty acid degradation;Chloroalkane and chloroalkene degradation;Tyrosine metabolism;Pyruvate metabolism;Drug metabolism - cytochrome P450;Glycolysis / Gluconeogenesis;Biosynthesis of secondary metabolites;Retinol metabolism
MAG196_gene0099	CPT_SW_2_k97_1270815_ORF99	MAG196	d__Bacteria;p__Pseudomonadota;c__Alphaproteobacteria;o__Rhizobiales;f__Rhizobiaceae;g__Unclassified;s__Unclassified	8854	9891	1038	K00001	adh	alcohol dehydrogenase [EC:1.1.1.1]	Metabolism of xenobiotics by cytochrome P450;Naphthalene degradation;Metabolic pathways;Degradation of aromatic compounds;Microbial metabolism in diverse environments;Fatty acid degradation;Chloroalkane and chloroalkene degradation;Tyrosine metabolism;Pyruvate metabolism;Drug metabolism - cytochrome P450;Glycolysis / Gluconeogenesis;Biosynthesis of secondary metabolites;Retinol metabolism
MAG196_gene1034	CPT_SW_2_k97_539290_ORF1030	MAG196	d__Bacteria;p__Pseudomonadota;c__Alphaproteobacteria;o__Rhizobiales;f__Rhizobiaceae;g__Unclassified;s__Unclassified	3356	2199	1158	K00001	adh	alcohol dehydrogenase [EC:1.1.1.1]	Metabolism of xenobiotics by cytochrome P450;Naphthalene degradation;Metabolic pathways;Degradation of aromatic compounds;Microbial metabolism in diverse environments;Fatty acid degradation;Chloroalkane and chloroalkene degradation;Tyrosine metabolism;Pyruvate metabolism;Drug metabolism - cytochrome P450;Glycolysis / Gluconeogenesis;Biosynthesis of secondary metabolites;Retinol metabolism
MAG196_gene2939	CPT_SW_2_k97_913089_ORF2922	MAG196	d__Bacteria;p__Pseudomonadota;c__Alphaproteobacteria;o__Rhizobiales;f__Rhizobiaceae;g__Unclassified;s__Unclassified	2605	2369	237	K00001	adh	alcohol dehydrogenase [EC:1.1.1.1]	Metabolism of xenobiotics by cytochrome P450;Naphthalene degradation;Metabolic pathways;Degradation of aromatic compounds;Microbial metabolism in diverse environments;Fatty acid degradation;Chloroalkane and chloroalkene degradation;Tyrosine metabolism;Pyruvate metabolism;Drug metabolism - cytochrome P450;Glycolysis / Gluconeogenesis;Biosynthesis of secondary metabolites;Retinol metabolism
MAG196_gene3579	CPT_SW_2_k97_29336_ORF3559	MAG196	d__Bacteria;p__Pseudomonadota;c__Alphaproteobacteria;o__Rhizobiales;f__Rhizobiaceae;g__Unclassified;s__Unclassified	1157	1717	561	K00001	adh	alcohol dehydrogenase [EC:1.1.1.1]	Metabolism of xenobiotics by cytochrome P450;Naphthalene degradation;Metabolic pathways;Degradation of aromatic compounds;Microbial metabolism in diverse environments;Fatty acid degradation;Chloroalkane and chloroalkene degradation;Tyrosine metabolism;Pyruvate metabolism;Drug metabolism - cytochrome P450;Glycolysis / Gluconeogenesis;Biosynthesis of secondary metabolites;Retinol metabolism
MAG196_gene3645	CPT_SW_2_k97_584415_ORF3625	MAG196	d__Bacteria;p__Pseudomonadota;c__Alphaproteobacteria;o__Rhizobiales;f__Rhizobiaceae;g__Unclassified;s__Unclassified	1502	348	1155	K00001	adh	alcohol dehydrogenase [EC:1.1.1.1]	Metabolism of xenobiotics by cytochrome P450;Naphthalene degradation;Metabolic pathways;Degradation of aromatic compounds;Microbial metabolism in diverse environments;Fatty acid degradation;Chloroalkane and chloroalkene degradation;Tyrosine metabolism;Pyruvate metabolism;Drug metabolism - cytochrome P450;Glycolysis / Gluconeogenesis;Biosynthesis of secondary metabolites;Retinol metabolism
MAG197_gene0936	M2_2_3_k97_258087_ORF925	MAG197	d__Bacteria;p__Bacteroidota;c__Bacteroidia;o__Flavobacteriales;f__Flavobacteriaceae;g__Robiginitalea;s__Unclassified	4647	4805	159	K00001	adh	alcohol dehydrogenase [EC:1.1.1.1]	Metabolism of xenobiotics by cytochrome P450;Naphthalene degradation;Metabolic pathways;Degradation of aromatic compounds;Microbial metabolism in diverse environments;Fatty acid degradation;Chloroalkane and chloroalkene degradation;Tyrosine metabolism;Pyruvate metabolism;Drug metabolism - cytochrome P450;Glycolysis / Gluconeogenesis;Biosynthesis of secondary metabolites;Retinol metabolism
MAG199_gene0577	FG_SC_2_k97_530364_ORF575	MAG199	d__Bacteria;p__Chloroflexota;c__Anaerolineae;o__Promineofilales;f__Promineofilaceae;g__JAKEFB01;s__Unclassified	2393	1440	954	K00001	adh	alcohol dehydrogenase [EC:1.1.1.1]	Metabolism of xenobiotics by cytochrome P450;Naphthalene degradation;Metabolic pathways;Degradation of aromatic compounds;Microbial metabolism in diverse environments;Fatty acid degradation;Chloroalkane and chloroalkene degradation;Tyrosine metabolism;Pyruvate metabolism;Drug metabolism - cytochrome P450;Glycolysis / Gluconeogenesis;Biosynthesis of secondary metabolites;Retinol metabolism
MAG199_gene3864	FG_SC_2_k97_1152420_ORF3842	MAG199	d__Bacteria;p__Chloroflexota;c__Anaerolineae;o__Promineofilales;f__Promineofilaceae;g__JAKEFB01;s__Unclassified	742	1743	1002	K00001	adh	alcohol dehydrogenase [EC:1.1.1.1]	Metabolism of xenobiotics by cytochrome P450;Naphthalene degradation;Metabolic pathways;Degradation of aromatic compounds;Microbial metabolism in diverse environments;Fatty acid degradation;Chloroalkane and chloroalkene degradation;Tyrosine metabolism;Pyruvate metabolism;Drug metabolism - cytochrome P450;Glycolysis / Gluconeogenesis;Biosynthesis of secondary metabolites;Retinol metabolism
MAG2_gene0842	FG_SC_1_k97_772994_ORF835	MAG2	d__Bacteria;p__Chloroflexota;c__Anaerolineae;o__Promineofilales;f__Promineofilaceae;g__Unclassified;s__Unclassified	621	1577	957	K00001	adh	alcohol dehydrogenase [EC:1.1.1.1]	Metabolism of xenobiotics by cytochrome P450;Naphthalene degradation;Metabolic pathways;Degradation of aromatic compounds;Microbial metabolism in diverse environments;Fatty acid degradation;Chloroalkane and chloroalkene degradation;Tyrosine metabolism;Pyruvate metabolism;Drug metabolism - cytochrome P450;Glycolysis / Gluconeogenesis;Biosynthesis of secondary metabolites;Retinol metabolism
MAG202_gene1051	M2_2_2_k97_965190_ORF1049	MAG202	d__Bacteria;p__Pseudomonadota;c__Alphaproteobacteria;o__Rhizobiales;f__Rhizobiaceae;g__Salaquimonas;s__Unclassified	23	1093	1071	K00001	adh	alcohol dehydrogenase [EC:1.1.1.1]	Metabolism of xenobiotics by cytochrome P450;Naphthalene degradation;Metabolic pathways;Degradation of aromatic compounds;Microbial metabolism in diverse environments;Fatty acid degradation;Chloroalkane and chloroalkene degradation;Tyrosine metabolism;Pyruvate metabolism;Drug metabolism - cytochrome P450;Glycolysis / Gluconeogenesis;Biosynthesis of secondary metabolites;Retinol metabolism
MAG202_gene1755	M2_2_2_k97_38080_ORF1746	MAG202	d__Bacteria;p__Pseudomonadota;c__Alphaproteobacteria;o__Rhizobiales;f__Rhizobiaceae;g__Salaquimonas;s__Unclassified	4142	2997	1146	K00001	adh	alcohol dehydrogenase [EC:1.1.1.1]	Metabolism of xenobiotics by cytochrome P450;Naphthalene degradation;Metabolic pathways;Degradation of aromatic compounds;Microbial metabolism in diverse environments;Fatty acid degradation;Chloroalkane and chloroalkene degradation;Tyrosine metabolism;Pyruvate metabolism;Drug metabolism - cytochrome P450;Glycolysis / Gluconeogenesis;Biosynthesis of secondary metabolites;Retinol metabolism
MAG202_gene1918	M2_2_2_k97_586206_ORF1908	MAG202	d__Bacteria;p__Pseudomonadota;c__Alphaproteobacteria;o__Rhizobiales;f__Rhizobiaceae;g__Salaquimonas;s__Unclassified	2851	1775	1077	K00001	adh	alcohol dehydrogenase [EC:1.1.1.1]	Metabolism of xenobiotics by cytochrome P450;Naphthalene degradation;Metabolic pathways;Degradation of aromatic compounds;Microbial metabolism in diverse environments;Fatty acid degradation;Chloroalkane and chloroalkene degradation;Tyrosine metabolism;Pyruvate metabolism;Drug metabolism - cytochrome P450;Glycolysis / Gluconeogenesis;Biosynthesis of secondary metabolites;Retinol metabolism
MAG202_gene2003	M2_2_2_k97_246483_ORF1992	MAG202	d__Bacteria;p__Pseudomonadota;c__Alphaproteobacteria;o__Rhizobiales;f__Rhizobiaceae;g__Salaquimonas;s__Unclassified	2708	3739	1032	K00001	adh	alcohol dehydrogenase [EC:1.1.1.1]	Metabolism of xenobiotics by cytochrome P450;Naphthalene degradation;Metabolic pathways;Degradation of aromatic compounds;Microbial metabolism in diverse environments;Fatty acid degradation;Chloroalkane and chloroalkene degradation;Tyrosine metabolism;Pyruvate metabolism;Drug metabolism - cytochrome P450;Glycolysis / Gluconeogenesis;Biosynthesis of secondary metabolites;Retinol metabolism
MAG203_gene2333	CPT_SW_1_k97_972632_ORF2317	MAG203	d__Bacteria;p__Pseudomonadota;c__Alphaproteobacteria;o__Rhizobiales;f__Rhizobiaceae;g__Unclassified;s__Unclassified	637	1674	1038	K00001	adh	alcohol dehydrogenase [EC:1.1.1.1]	Metabolism of xenobiotics by cytochrome P450;Naphthalene degradation;Metabolic pathways;Degradation of aromatic compounds;Microbial metabolism in diverse environments;Fatty acid degradation;Chloroalkane and chloroalkene degradation;Tyrosine metabolism;Pyruvate metabolism;Drug metabolism - cytochrome P450;Glycolysis / Gluconeogenesis;Biosynthesis of secondary metabolites;Retinol metabolism
MAG203_gene3121	CPT_SW_1_k97_1188570_ORF3101	MAG203	d__Bacteria;p__Pseudomonadota;c__Alphaproteobacteria;o__Rhizobiales;f__Rhizobiaceae;g__Unclassified;s__Unclassified	1729	572	1158	K00001	adh	alcohol dehydrogenase [EC:1.1.1.1]	Metabolism of xenobiotics by cytochrome P450;Naphthalene degradation;Metabolic pathways;Degradation of aromatic compounds;Microbial metabolism in diverse environments;Fatty acid degradation;Chloroalkane and chloroalkene degradation;Tyrosine metabolism;Pyruvate metabolism;Drug metabolism - cytochrome P450;Glycolysis / Gluconeogenesis;Biosynthesis of secondary metabolites;Retinol metabolism
MAG203_gene4089	CPT_SW_1_k97_1064618_ORF4069	MAG203	d__Bacteria;p__Pseudomonadota;c__Alphaproteobacteria;o__Rhizobiales;f__Rhizobiaceae;g__Unclassified;s__Unclassified	713	3	711	K00001	adh	alcohol dehydrogenase [EC:1.1.1.1]	Metabolism of xenobiotics by cytochrome P450;Naphthalene degradation;Metabolic pathways;Degradation of aromatic compounds;Microbial metabolism in diverse environments;Fatty acid degradation;Chloroalkane and chloroalkene degradation;Tyrosine metabolism;Pyruvate metabolism;Drug metabolism - cytochrome P450;Glycolysis / Gluconeogenesis;Biosynthesis of secondary metabolites;Retinol metabolism
MAG203_gene4113	CPT_SW_1_k97_1295723_ORF4093	MAG203	d__Bacteria;p__Pseudomonadota;c__Alphaproteobacteria;o__Rhizobiales;f__Rhizobiaceae;g__Unclassified;s__Unclassified	3	557	555	K00001	adh	alcohol dehydrogenase [EC:1.1.1.1]	Metabolism of xenobiotics by cytochrome P450;Naphthalene degradation;Metabolic pathways;Degradation of aromatic compounds;Microbial metabolism in diverse environments;Fatty acid degradation;Chloroalkane and chloroalkene degradation;Tyrosine metabolism;Pyruvate metabolism;Drug metabolism - cytochrome P450;Glycolysis / Gluconeogenesis;Biosynthesis of secondary metabolites;Retinol metabolism
MAG203_gene4153	CPT_SW_1_k97_1134430_ORF4133	MAG203	d__Bacteria;p__Pseudomonadota;c__Alphaproteobacteria;o__Rhizobiales;f__Rhizobiaceae;g__Unclassified;s__Unclassified	1013	3	1011	K00001	adh	alcohol dehydrogenase [EC:1.1.1.1]	Metabolism of xenobiotics by cytochrome P450;Naphthalene degradation;Metabolic pathways;Degradation of aromatic compounds;Microbial metabolism in diverse environments;Fatty acid degradation;Chloroalkane and chloroalkene degradation;Tyrosine metabolism;Pyruvate metabolism;Drug metabolism - cytochrome P450;Glycolysis / Gluconeogenesis;Biosynthesis of secondary metabolites;Retinol metabolism
MAG203_gene4261	CPT_SW_1_k97_298665_ORF4240	MAG203	d__Bacteria;p__Pseudomonadota;c__Alphaproteobacteria;o__Rhizobiales;f__Rhizobiaceae;g__Unclassified;s__Unclassified	1005	769	237	K00001	adh	alcohol dehydrogenase [EC:1.1.1.1]	Metabolism of xenobiotics by cytochrome P450;Naphthalene degradation;Metabolic pathways;Degradation of aromatic compounds;Microbial metabolism in diverse environments;Fatty acid degradation;Chloroalkane and chloroalkene degradation;Tyrosine metabolism;Pyruvate metabolism;Drug metabolism - cytochrome P450;Glycolysis / Gluconeogenesis;Biosynthesis of secondary metabolites;Retinol metabolism
MAG204_gene3004	CPT_SW_2_k97_956873_ORF2987	MAG204	d__Bacteria;p__Chloroflexota;c__Anaerolineae;o__Anaerolineales;f__UBA4823;g__DSOS01;s__Unclassified	4283	3753	531	K00001	adh	alcohol dehydrogenase [EC:1.1.1.1]	Metabolism of xenobiotics by cytochrome P450;Naphthalene degradation;Metabolic pathways;Degradation of aromatic compounds;Microbial metabolism in diverse environments;Fatty acid degradation;Chloroalkane and chloroalkene degradation;Tyrosine metabolism;Pyruvate metabolism;Drug metabolism - cytochrome P450;Glycolysis / Gluconeogenesis;Biosynthesis of secondary metabolites;Retinol metabolism
MAG204_gene3478	CPT_SW_2_k97_10155_ORF3459	MAG204	d__Bacteria;p__Chloroflexota;c__Anaerolineae;o__Anaerolineales;f__UBA4823;g__DSOS01;s__Unclassified	2660	3460	801	K00001	adh	alcohol dehydrogenase [EC:1.1.1.1]	Metabolism of xenobiotics by cytochrome P450;Naphthalene degradation;Metabolic pathways;Degradation of aromatic compounds;Microbial metabolism in diverse environments;Fatty acid degradation;Chloroalkane and chloroalkene degradation;Tyrosine metabolism;Pyruvate metabolism;Drug metabolism - cytochrome P450;Glycolysis / Gluconeogenesis;Biosynthesis of secondary metabolites;Retinol metabolism
MAG206_gene0524	DY_2_k97_506147_ORF514	MAG206	d__Bacteria;p__Bacteroidota;c__Bacteroidia;o__Bacteroidales;f__UBA5342;g__Unclassified;s__Unclassified	1233	2204	972	K00001	adh	alcohol dehydrogenase [EC:1.1.1.1]	Metabolism of xenobiotics by cytochrome P450;Naphthalene degradation;Metabolic pathways;Degradation of aromatic compounds;Microbial metabolism in diverse environments;Fatty acid degradation;Chloroalkane and chloroalkene degradation;Tyrosine metabolism;Pyruvate metabolism;Drug metabolism - cytochrome P450;Glycolysis / Gluconeogenesis;Biosynthesis of secondary metabolites;Retinol metabolism
MAG206_gene1653	DY_2_k97_113274_ORF1634	MAG206	d__Bacteria;p__Bacteroidota;c__Bacteroidia;o__Bacteroidales;f__UBA5342;g__Unclassified;s__Unclassified	1097	2080	984	K00001	adh	alcohol dehydrogenase [EC:1.1.1.1]	Metabolism of xenobiotics by cytochrome P450;Naphthalene degradation;Metabolic pathways;Degradation of aromatic compounds;Microbial metabolism in diverse environments;Fatty acid degradation;Chloroalkane and chloroalkene degradation;Tyrosine metabolism;Pyruvate metabolism;Drug metabolism - cytochrome P450;Glycolysis / Gluconeogenesis;Biosynthesis of secondary metabolites;Retinol metabolism
MAG207_gene2962	CPT_SW_1_k97_389976_ORF2944	MAG207	d__Bacteria;p__Pseudomonadota;c__Alphaproteobacteria;o__Rhizobiales;f__Xanthobacteraceae;g__Pseudolabrys;s__Unclassified	532	1554	1023	K00001	adh	alcohol dehydrogenase [EC:1.1.1.1]	Metabolism of xenobiotics by cytochrome P450;Naphthalene degradation;Metabolic pathways;Degradation of aromatic compounds;Microbial metabolism in diverse environments;Fatty acid degradation;Chloroalkane and chloroalkene degradation;Tyrosine metabolism;Pyruvate metabolism;Drug metabolism - cytochrome P450;Glycolysis / Gluconeogenesis;Biosynthesis of secondary metabolites;Retinol metabolism
MAG208_gene0840	M2_2_1_k97_228260_ORF838	MAG208	d__Bacteria;p__Bacteroidota;c__Ignavibacteria;o__Ignavibacteriales;f__Ignavibacteriaceae;g__Unclassified;s__Unclassified	1328	2305	978	K00001	adh	alcohol dehydrogenase [EC:1.1.1.1]	Metabolism of xenobiotics by cytochrome P450;Naphthalene degradation;Metabolic pathways;Degradation of aromatic compounds;Microbial metabolism in diverse environments;Fatty acid degradation;Chloroalkane and chloroalkene degradation;Tyrosine metabolism;Pyruvate metabolism;Drug metabolism - cytochrome P450;Glycolysis / Gluconeogenesis;Biosynthesis of secondary metabolites;Retinol metabolism
MAG208_gene2068	M2_2_1_k97_330918_ORF2061	MAG208	d__Bacteria;p__Bacteroidota;c__Ignavibacteria;o__Ignavibacteriales;f__Ignavibacteriaceae;g__Unclassified;s__Unclassified	1412	468	945	K00001	adh	alcohol dehydrogenase [EC:1.1.1.1]	Metabolism of xenobiotics by cytochrome P450;Naphthalene degradation;Metabolic pathways;Degradation of aromatic compounds;Microbial metabolism in diverse environments;Fatty acid degradation;Chloroalkane and chloroalkene degradation;Tyrosine metabolism;Pyruvate metabolism;Drug metabolism - cytochrome P450;Glycolysis / Gluconeogenesis;Biosynthesis of secondary metabolites;Retinol metabolism
MAG208_gene2912	M2_2_1_k97_927888_ORF2900	MAG208	d__Bacteria;p__Bacteroidota;c__Ignavibacteria;o__Ignavibacteriales;f__Ignavibacteriaceae;g__Unclassified;s__Unclassified	1192	344	849	K00001	adh	alcohol dehydrogenase [EC:1.1.1.1]	Metabolism of xenobiotics by cytochrome P450;Naphthalene degradation;Metabolic pathways;Degradation of aromatic compounds;Microbial metabolism in diverse environments;Fatty acid degradation;Chloroalkane and chloroalkene degradation;Tyrosine metabolism;Pyruvate metabolism;Drug metabolism - cytochrome P450;Glycolysis / Gluconeogenesis;Biosynthesis of secondary metabolites;Retinol metabolism
MAG209_gene1946	M2_2_1_k97_1148005_ORF1935	MAG209	d__Bacteria;p__Gemmatimonadota;c__Gemmatimonadetes;o__Longimicrobiales;f__UBA6960;g__Unclassified;s__Unclassified	6894	5842	1053	K00001	adh	alcohol dehydrogenase [EC:1.1.1.1]	Metabolism of xenobiotics by cytochrome P450;Naphthalene degradation;Metabolic pathways;Degradation of aromatic compounds;Microbial metabolism in diverse environments;Fatty acid degradation;Chloroalkane and chloroalkene degradation;Tyrosine metabolism;Pyruvate metabolism;Drug metabolism - cytochrome P450;Glycolysis / Gluconeogenesis;Biosynthesis of secondary metabolites;Retinol metabolism
MAG210_gene0788	M3_1_3_k97_675572_ORF783	MAG210	d__Bacteria;p__Pseudomonadota;c__Gammaproteobacteria;o__XN24;f__XN24;g__Unclassified;s__Unclassified	569	3	567	K00001	adh	alcohol dehydrogenase [EC:1.1.1.1]	Metabolism of xenobiotics by cytochrome P450;Naphthalene degradation;Metabolic pathways;Degradation of aromatic compounds;Microbial metabolism in diverse environments;Fatty acid degradation;Chloroalkane and chloroalkene degradation;Tyrosine metabolism;Pyruvate metabolism;Drug metabolism - cytochrome P450;Glycolysis / Gluconeogenesis;Biosynthesis of secondary metabolites;Retinol metabolism
MAG210_gene2251	M3_1_3_k97_1088268_ORF2234	MAG210	d__Bacteria;p__Pseudomonadota;c__Gammaproteobacteria;o__XN24;f__XN24;g__Unclassified;s__Unclassified	3	1133	1131	K00001	adh	alcohol dehydrogenase [EC:1.1.1.1]	Metabolism of xenobiotics by cytochrome P450;Naphthalene degradation;Metabolic pathways;Degradation of aromatic compounds;Microbial metabolism in diverse environments;Fatty acid degradation;Chloroalkane and chloroalkene degradation;Tyrosine metabolism;Pyruvate metabolism;Drug metabolism - cytochrome P450;Glycolysis / Gluconeogenesis;Biosynthesis of secondary metabolites;Retinol metabolism
MAG212_gene0768	M2_2_1_k97_1722993_ORF757	MAG212	d__Bacteria;p__Actinomycetota;c__Actinomycetia;o__Jiangellales;f__Unclassified;g__Unclassified;s__Unclassified	3	779	777	K00001	adh	alcohol dehydrogenase [EC:1.1.1.1]	Metabolism of xenobiotics by cytochrome P450;Naphthalene degradation;Metabolic pathways;Degradation of aromatic compounds;Microbial metabolism in diverse environments;Fatty acid degradation;Chloroalkane and chloroalkene degradation;Tyrosine metabolism;Pyruvate metabolism;Drug metabolism - cytochrome P450;Glycolysis / Gluconeogenesis;Biosynthesis of secondary metabolites;Retinol metabolism
MAG212_gene1759	M2_2_1_k97_1279010_ORF1735	MAG212	d__Bacteria;p__Actinomycetota;c__Actinomycetia;o__Jiangellales;f__Unclassified;g__Unclassified;s__Unclassified	3486	2449	1038	K00001	adh	alcohol dehydrogenase [EC:1.1.1.1]	Metabolism of xenobiotics by cytochrome P450;Naphthalene degradation;Metabolic pathways;Degradation of aromatic compounds;Microbial metabolism in diverse environments;Fatty acid degradation;Chloroalkane and chloroalkene degradation;Tyrosine metabolism;Pyruvate metabolism;Drug metabolism - cytochrome P450;Glycolysis / Gluconeogenesis;Biosynthesis of secondary metabolites;Retinol metabolism
MAG212_gene2511	M2_2_1_k97_1448033_ORF2480	MAG212	d__Bacteria;p__Actinomycetota;c__Actinomycetia;o__Jiangellales;f__Unclassified;g__Unclassified;s__Unclassified	350	3	348	K00001	adh	alcohol dehydrogenase [EC:1.1.1.1]	Metabolism of xenobiotics by cytochrome P450;Naphthalene degradation;Metabolic pathways;Degradation of aromatic compounds;Microbial metabolism in diverse environments;Fatty acid degradation;Chloroalkane and chloroalkene degradation;Tyrosine metabolism;Pyruvate metabolism;Drug metabolism - cytochrome P450;Glycolysis / Gluconeogenesis;Biosynthesis of secondary metabolites;Retinol metabolism
MAG214_gene2209	M2_1_3_k97_39696_ORF2197	MAG214	d__Bacteria;p__Chloroflexota;c__Anaerolineae;o__Promineofilales;f__Promineofilaceae;g__JAACFF01;s__Unclassified	57	1049	993	K00001	adh	alcohol dehydrogenase [EC:1.1.1.1]	Metabolism of xenobiotics by cytochrome P450;Naphthalene degradation;Metabolic pathways;Degradation of aromatic compounds;Microbial metabolism in diverse environments;Fatty acid degradation;Chloroalkane and chloroalkene degradation;Tyrosine metabolism;Pyruvate metabolism;Drug metabolism - cytochrome P450;Glycolysis / Gluconeogenesis;Biosynthesis of secondary metabolites;Retinol metabolism
MAG214_gene2779	M2_1_3_k97_1842747_ORF2761	MAG214	d__Bacteria;p__Chloroflexota;c__Anaerolineae;o__Promineofilales;f__Promineofilaceae;g__JAACFF01;s__Unclassified	1430	381	1050	K00001	adh	alcohol dehydrogenase [EC:1.1.1.1]	Metabolism of xenobiotics by cytochrome P450;Naphthalene degradation;Metabolic pathways;Degradation of aromatic compounds;Microbial metabolism in diverse environments;Fatty acid degradation;Chloroalkane and chloroalkene degradation;Tyrosine metabolism;Pyruvate metabolism;Drug metabolism - cytochrome P450;Glycolysis / Gluconeogenesis;Biosynthesis of secondary metabolites;Retinol metabolism
MAG215_gene0515	FG_WR_3_k97_55410_ORF509	MAG215	d__Bacteria;p__Bacteroidota;c__Bacteroidia;o__Chitinophagales;f__Saprospiraceae;g__Unclassified;s__Unclassified	1128	2102	975	K00001	adh	alcohol dehydrogenase [EC:1.1.1.1]	Metabolism of xenobiotics by cytochrome P450;Naphthalene degradation;Metabolic pathways;Degradation of aromatic compounds;Microbial metabolism in diverse environments;Fatty acid degradation;Chloroalkane and chloroalkene degradation;Tyrosine metabolism;Pyruvate metabolism;Drug metabolism - cytochrome P450;Glycolysis / Gluconeogenesis;Biosynthesis of secondary metabolites;Retinol metabolism
MAG216_gene0505	CPT_SW_1_k97_1122381_ORF500	MAG216	d__Bacteria;p__Nitrospirota;c__Nitrospiria;o__Nitrospirales;f__UBA8639;g__UBA8639;s__Unclassified	1945	2277	333	K00001	adh	alcohol dehydrogenase [EC:1.1.1.1]	Metabolism of xenobiotics by cytochrome P450;Naphthalene degradation;Metabolic pathways;Degradation of aromatic compounds;Microbial metabolism in diverse environments;Fatty acid degradation;Chloroalkane and chloroalkene degradation;Tyrosine metabolism;Pyruvate metabolism;Drug metabolism - cytochrome P450;Glycolysis / Gluconeogenesis;Biosynthesis of secondary metabolites;Retinol metabolism
MAG217_gene1036	CPT_LW_2_k97_428012_ORF1028	MAG217	d__Bacteria;p__Chloroflexota;c__Anaerolineae;o__Anaerolineales;f__UBA4823;g__PFL25;s__Unclassified	1446	517	930	K00001	adh	alcohol dehydrogenase [EC:1.1.1.1]	Metabolism of xenobiotics by cytochrome P450;Naphthalene degradation;Metabolic pathways;Degradation of aromatic compounds;Microbial metabolism in diverse environments;Fatty acid degradation;Chloroalkane and chloroalkene degradation;Tyrosine metabolism;Pyruvate metabolism;Drug metabolism - cytochrome P450;Glycolysis / Gluconeogenesis;Biosynthesis of secondary metabolites;Retinol metabolism
MAG217_gene1340	CPT_LW_2_k97_444178_ORF1332	MAG217	d__Bacteria;p__Chloroflexota;c__Anaerolineae;o__Anaerolineales;f__UBA4823;g__PFL25;s__Unclassified	3558	2557	1002	K00001	adh	alcohol dehydrogenase [EC:1.1.1.1]	Metabolism of xenobiotics by cytochrome P450;Naphthalene degradation;Metabolic pathways;Degradation of aromatic compounds;Microbial metabolism in diverse environments;Fatty acid degradation;Chloroalkane and chloroalkene degradation;Tyrosine metabolism;Pyruvate metabolism;Drug metabolism - cytochrome P450;Glycolysis / Gluconeogenesis;Biosynthesis of secondary metabolites;Retinol metabolism
MAG217_gene3087	CPT_LW_2_k97_743655_ORF3070	MAG217	d__Bacteria;p__Chloroflexota;c__Anaerolineae;o__Anaerolineales;f__UBA4823;g__PFL25;s__Unclassified	1	1008	1008	K00001	adh	alcohol dehydrogenase [EC:1.1.1.1]	Metabolism of xenobiotics by cytochrome P450;Naphthalene degradation;Metabolic pathways;Degradation of aromatic compounds;Microbial metabolism in diverse environments;Fatty acid degradation;Chloroalkane and chloroalkene degradation;Tyrosine metabolism;Pyruvate metabolism;Drug metabolism - cytochrome P450;Glycolysis / Gluconeogenesis;Biosynthesis of secondary metabolites;Retinol metabolism
MAG217_gene3764	CPT_LW_2_k97_530410_ORF3741	MAG217	d__Bacteria;p__Chloroflexota;c__Anaerolineae;o__Anaerolineales;f__UBA4823;g__PFL25;s__Unclassified	1241	258	984	K00001	adh	alcohol dehydrogenase [EC:1.1.1.1]	Metabolism of xenobiotics by cytochrome P450;Naphthalene degradation;Metabolic pathways;Degradation of aromatic compounds;Microbial metabolism in diverse environments;Fatty acid degradation;Chloroalkane and chloroalkene degradation;Tyrosine metabolism;Pyruvate metabolism;Drug metabolism - cytochrome P450;Glycolysis / Gluconeogenesis;Biosynthesis of secondary metabolites;Retinol metabolism
MAG22_gene0865	M3_2_3_k97_856469_ORF857	MAG22	d__Bacteria;p__Pseudomonadota;c__Gammaproteobacteria;o__XN24;f__XN24;g__Unclassified;s__Unclassified	1389	2537	1149	K00001	adh	alcohol dehydrogenase [EC:1.1.1.1]	Metabolism of xenobiotics by cytochrome P450;Naphthalene degradation;Metabolic pathways;Degradation of aromatic compounds;Microbial metabolism in diverse environments;Fatty acid degradation;Chloroalkane and chloroalkene degradation;Tyrosine metabolism;Pyruvate metabolism;Drug metabolism - cytochrome P450;Glycolysis / Gluconeogenesis;Biosynthesis of secondary metabolites;Retinol metabolism
MAG22_gene0947	M3_2_3_k97_922814_ORF939	MAG22	d__Bacteria;p__Pseudomonadota;c__Gammaproteobacteria;o__XN24;f__XN24;g__Unclassified;s__Unclassified	541	1650	1110	K00001	adh	alcohol dehydrogenase [EC:1.1.1.1]	Metabolism of xenobiotics by cytochrome P450;Naphthalene degradation;Metabolic pathways;Degradation of aromatic compounds;Microbial metabolism in diverse environments;Fatty acid degradation;Chloroalkane and chloroalkene degradation;Tyrosine metabolism;Pyruvate metabolism;Drug metabolism - cytochrome P450;Glycolysis / Gluconeogenesis;Biosynthesis of secondary metabolites;Retinol metabolism
MAG22_gene1360	M3_2_3_k97_725343_ORF1350	MAG22	d__Bacteria;p__Pseudomonadota;c__Gammaproteobacteria;o__XN24;f__XN24;g__Unclassified;s__Unclassified	2105	1002	1104	K00001	adh	alcohol dehydrogenase [EC:1.1.1.1]	Metabolism of xenobiotics by cytochrome P450;Naphthalene degradation;Metabolic pathways;Degradation of aromatic compounds;Microbial metabolism in diverse environments;Fatty acid degradation;Chloroalkane and chloroalkene degradation;Tyrosine metabolism;Pyruvate metabolism;Drug metabolism - cytochrome P450;Glycolysis / Gluconeogenesis;Biosynthesis of secondary metabolites;Retinol metabolism
MAG222_gene1537	M2_2_2_k97_1484473_ORF1521	MAG222	d__Bacteria;p__Bacteroidota;c__Bacteroidia;o__Bacteroidales;f__VadinHA17;g__SR-FBR-E99;s__Unclassified	2353	1181	1173	K00001	adh	alcohol dehydrogenase [EC:1.1.1.1]	Metabolism of xenobiotics by cytochrome P450;Naphthalene degradation;Metabolic pathways;Degradation of aromatic compounds;Microbial metabolism in diverse environments;Fatty acid degradation;Chloroalkane and chloroalkene degradation;Tyrosine metabolism;Pyruvate metabolism;Drug metabolism - cytochrome P450;Glycolysis / Gluconeogenesis;Biosynthesis of secondary metabolites;Retinol metabolism
MAG222_gene2080	M2_2_2_k97_842608_ORF2062	MAG222	d__Bacteria;p__Bacteroidota;c__Bacteroidia;o__Bacteroidales;f__VadinHA17;g__SR-FBR-E99;s__Unclassified	1343	399	945	K00001	adh	alcohol dehydrogenase [EC:1.1.1.1]	Metabolism of xenobiotics by cytochrome P450;Naphthalene degradation;Metabolic pathways;Degradation of aromatic compounds;Microbial metabolism in diverse environments;Fatty acid degradation;Chloroalkane and chloroalkene degradation;Tyrosine metabolism;Pyruvate metabolism;Drug metabolism - cytochrome P450;Glycolysis / Gluconeogenesis;Biosynthesis of secondary metabolites;Retinol metabolism
MAG223_gene0803	CPT_MZ_2_k97_173728_ORF795	MAG223	d__Archaea;p__Thermoproteota;c__Nitrososphaeria;o__Nitrososphaerales;f__Nitrososphaeraceae;g__TH1177;s__Unclassified	11290	11724	435	K00001	adh	alcohol dehydrogenase [EC:1.1.1.1]	Metabolism of xenobiotics by cytochrome P450;Naphthalene degradation;Metabolic pathways;Degradation of aromatic compounds;Microbial metabolism in diverse environments;Fatty acid degradation;Chloroalkane and chloroalkene degradation;Tyrosine metabolism;Pyruvate metabolism;Drug metabolism - cytochrome P450;Glycolysis / Gluconeogenesis;Biosynthesis of secondary metabolites;Retinol metabolism
MAG223_gene1444	CPT_MZ_2_k97_1224102_ORF1432	MAG223	d__Archaea;p__Thermoproteota;c__Nitrososphaeria;o__Nitrososphaerales;f__Nitrososphaeraceae;g__TH1177;s__Unclassified	6923	6723	201	K00001	adh	alcohol dehydrogenase [EC:1.1.1.1]	Metabolism of xenobiotics by cytochrome P450;Naphthalene degradation;Metabolic pathways;Degradation of aromatic compounds;Microbial metabolism in diverse environments;Fatty acid degradation;Chloroalkane and chloroalkene degradation;Tyrosine metabolism;Pyruvate metabolism;Drug metabolism - cytochrome P450;Glycolysis / Gluconeogenesis;Biosynthesis of secondary metabolites;Retinol metabolism
MAG223_gene1568	CPT_MZ_2_k97_7782_ORF1556	MAG223	d__Archaea;p__Thermoproteota;c__Nitrososphaeria;o__Nitrososphaerales;f__Nitrososphaeraceae;g__TH1177;s__Unclassified	6315	5587	729	K00001	adh	alcohol dehydrogenase [EC:1.1.1.1]	Metabolism of xenobiotics by cytochrome P450;Naphthalene degradation;Metabolic pathways;Degradation of aromatic compounds;Microbial metabolism in diverse environments;Fatty acid degradation;Chloroalkane and chloroalkene degradation;Tyrosine metabolism;Pyruvate metabolism;Drug metabolism - cytochrome P450;Glycolysis / Gluconeogenesis;Biosynthesis of secondary metabolites;Retinol metabolism
MAG223_gene2602	CPT_MZ_2_k97_1585211_ORF2586	MAG223	d__Archaea;p__Thermoproteota;c__Nitrososphaeria;o__Nitrososphaerales;f__Nitrososphaeraceae;g__TH1177;s__Unclassified	1232	2281	1050	K00001	adh	alcohol dehydrogenase [EC:1.1.1.1]	Metabolism of xenobiotics by cytochrome P450;Naphthalene degradation;Metabolic pathways;Degradation of aromatic compounds;Microbial metabolism in diverse environments;Fatty acid degradation;Chloroalkane and chloroalkene degradation;Tyrosine metabolism;Pyruvate metabolism;Drug metabolism - cytochrome P450;Glycolysis / Gluconeogenesis;Biosynthesis of secondary metabolites;Retinol metabolism
MAG226_gene1860	M1_2_1_k97_509153_ORF1856	MAG226	d__Bacteria;p__Planctomycetota;c__Planctomycetia;o__Pirellulales;f__Pirellulaceae;g__Rubripirellula;s__Unclassified	256	1296	1041	K00001	adh	alcohol dehydrogenase [EC:1.1.1.1]	Metabolism of xenobiotics by cytochrome P450;Naphthalene degradation;Metabolic pathways;Degradation of aromatic compounds;Microbial metabolism in diverse environments;Fatty acid degradation;Chloroalkane and chloroalkene degradation;Tyrosine metabolism;Pyruvate metabolism;Drug metabolism - cytochrome P450;Glycolysis / Gluconeogenesis;Biosynthesis of secondary metabolites;Retinol metabolism
MAG226_gene3797	M1_2_1_k97_631971_ORF3781	MAG226	d__Bacteria;p__Planctomycetota;c__Planctomycetia;o__Pirellulales;f__Pirellulaceae;g__Rubripirellula;s__Unclassified	169	2	168	K00001	adh	alcohol dehydrogenase [EC:1.1.1.1]	Metabolism of xenobiotics by cytochrome P450;Naphthalene degradation;Metabolic pathways;Degradation of aromatic compounds;Microbial metabolism in diverse environments;Fatty acid degradation;Chloroalkane and chloroalkene degradation;Tyrosine metabolism;Pyruvate metabolism;Drug metabolism - cytochrome P450;Glycolysis / Gluconeogenesis;Biosynthesis of secondary metabolites;Retinol metabolism
MAG227_gene0379	FG_WR_3_k97_465419_ORF379	MAG227	d__Bacteria;p__Actinomycetota;c__Actinomycetia;o__Actinomycetales;f__Dermatophilaceae;g__Phycicoccus;s__Unclassified	5898	5392	507	K00001	adh	alcohol dehydrogenase [EC:1.1.1.1]	Metabolism of xenobiotics by cytochrome P450;Naphthalene degradation;Metabolic pathways;Degradation of aromatic compounds;Microbial metabolism in diverse environments;Fatty acid degradation;Chloroalkane and chloroalkene degradation;Tyrosine metabolism;Pyruvate metabolism;Drug metabolism - cytochrome P450;Glycolysis / Gluconeogenesis;Biosynthesis of secondary metabolites;Retinol metabolism
MAG227_gene1225	FG_WR_3_k97_904089_ORF1220	MAG227	d__Bacteria;p__Actinomycetota;c__Actinomycetia;o__Actinomycetales;f__Dermatophilaceae;g__Phycicoccus;s__Unclassified	3248	2481	768	K00001	adh	alcohol dehydrogenase [EC:1.1.1.1]	Metabolism of xenobiotics by cytochrome P450;Naphthalene degradation;Metabolic pathways;Degradation of aromatic compounds;Microbial metabolism in diverse environments;Fatty acid degradation;Chloroalkane and chloroalkene degradation;Tyrosine metabolism;Pyruvate metabolism;Drug metabolism - cytochrome P450;Glycolysis / Gluconeogenesis;Biosynthesis of secondary metabolites;Retinol metabolism
MAG227_gene1826	FG_WR_3_k97_124533_ORF1818	MAG227	d__Bacteria;p__Actinomycetota;c__Actinomycetia;o__Actinomycetales;f__Dermatophilaceae;g__Phycicoccus;s__Unclassified	1225	257	969	K00001	adh	alcohol dehydrogenase [EC:1.1.1.1]	Metabolism of xenobiotics by cytochrome P450;Naphthalene degradation;Metabolic pathways;Degradation of aromatic compounds;Microbial metabolism in diverse environments;Fatty acid degradation;Chloroalkane and chloroalkene degradation;Tyrosine metabolism;Pyruvate metabolism;Drug metabolism - cytochrome P450;Glycolysis / Gluconeogenesis;Biosynthesis of secondary metabolites;Retinol metabolism
MAG227_gene2812	FG_WR_3_k97_1013079_ORF2799	MAG227	d__Bacteria;p__Actinomycetota;c__Actinomycetia;o__Actinomycetales;f__Dermatophilaceae;g__Phycicoccus;s__Unclassified	3	947	945	K00001	adh	alcohol dehydrogenase [EC:1.1.1.1]	Metabolism of xenobiotics by cytochrome P450;Naphthalene degradation;Metabolic pathways;Degradation of aromatic compounds;Microbial metabolism in diverse environments;Fatty acid degradation;Chloroalkane and chloroalkene degradation;Tyrosine metabolism;Pyruvate metabolism;Drug metabolism - cytochrome P450;Glycolysis / Gluconeogenesis;Biosynthesis of secondary metabolites;Retinol metabolism
MAG227_gene2837	FG_WR_3_k97_983555_ORF2824	MAG227	d__Bacteria;p__Actinomycetota;c__Actinomycetia;o__Actinomycetales;f__Dermatophilaceae;g__Phycicoccus;s__Unclassified	1056	40	1017	K00001	adh	alcohol dehydrogenase [EC:1.1.1.1]	Metabolism of xenobiotics by cytochrome P450;Naphthalene degradation;Metabolic pathways;Degradation of aromatic compounds;Microbial metabolism in diverse environments;Fatty acid degradation;Chloroalkane and chloroalkene degradation;Tyrosine metabolism;Pyruvate metabolism;Drug metabolism - cytochrome P450;Glycolysis / Gluconeogenesis;Biosynthesis of secondary metabolites;Retinol metabolism
MAG227_gene3103	FG_WR_3_k97_405424_ORF3088	MAG227	d__Bacteria;p__Actinomycetota;c__Actinomycetia;o__Actinomycetales;f__Dermatophilaceae;g__Phycicoccus;s__Unclassified	239	1279	1041	K00001	adh	alcohol dehydrogenase [EC:1.1.1.1]	Metabolism of xenobiotics by cytochrome P450;Naphthalene degradation;Metabolic pathways;Degradation of aromatic compounds;Microbial metabolism in diverse environments;Fatty acid degradation;Chloroalkane and chloroalkene degradation;Tyrosine metabolism;Pyruvate metabolism;Drug metabolism - cytochrome P450;Glycolysis / Gluconeogenesis;Biosynthesis of secondary metabolites;Retinol metabolism
MAG228_gene0431	M3_1_2_k97_187260_ORF428	MAG228	d__Bacteria;p__Pseudomonadota;c__Gammaproteobacteria;o__Pseudomonadales;f__Halieaceae;g__Halioglobus;s__Unclassified	1	480	480	K00001	adh	alcohol dehydrogenase [EC:1.1.1.1]	Metabolism of xenobiotics by cytochrome P450;Naphthalene degradation;Metabolic pathways;Degradation of aromatic compounds;Microbial metabolism in diverse environments;Fatty acid degradation;Chloroalkane and chloroalkene degradation;Tyrosine metabolism;Pyruvate metabolism;Drug metabolism - cytochrome P450;Glycolysis / Gluconeogenesis;Biosynthesis of secondary metabolites;Retinol metabolism
MAG228_gene0694	M3_1_2_k97_1234278_ORF688	MAG228	d__Bacteria;p__Pseudomonadota;c__Gammaproteobacteria;o__Pseudomonadales;f__Halieaceae;g__Halioglobus;s__Unclassified	2	157	156	K00001	adh	alcohol dehydrogenase [EC:1.1.1.1]	Metabolism of xenobiotics by cytochrome P450;Naphthalene degradation;Metabolic pathways;Degradation of aromatic compounds;Microbial metabolism in diverse environments;Fatty acid degradation;Chloroalkane and chloroalkene degradation;Tyrosine metabolism;Pyruvate metabolism;Drug metabolism - cytochrome P450;Glycolysis / Gluconeogenesis;Biosynthesis of secondary metabolites;Retinol metabolism
MAG228_gene2147	M3_1_2_k97_941563_ORF2126	MAG228	d__Bacteria;p__Pseudomonadota;c__Gammaproteobacteria;o__Pseudomonadales;f__Halieaceae;g__Halioglobus;s__Unclassified	413	1417	1005	K00001	adh	alcohol dehydrogenase [EC:1.1.1.1]	Metabolism of xenobiotics by cytochrome P450;Naphthalene degradation;Metabolic pathways;Degradation of aromatic compounds;Microbial metabolism in diverse environments;Fatty acid degradation;Chloroalkane and chloroalkene degradation;Tyrosine metabolism;Pyruvate metabolism;Drug metabolism - cytochrome P450;Glycolysis / Gluconeogenesis;Biosynthesis of secondary metabolites;Retinol metabolism
MAG229_gene3256	M2_2_1_k97_113610_ORF3222	MAG229	d__Bacteria;p__Bacteroidota;c__Ignavibacteria;o__Ignavibacteriales;f__Melioribacteraceae;g__GCA-2746605;s__Unclassified	1	639	639	K00001	adh	alcohol dehydrogenase [EC:1.1.1.1]	Metabolism of xenobiotics by cytochrome P450;Naphthalene degradation;Metabolic pathways;Degradation of aromatic compounds;Microbial metabolism in diverse environments;Fatty acid degradation;Chloroalkane and chloroalkene degradation;Tyrosine metabolism;Pyruvate metabolism;Drug metabolism - cytochrome P450;Glycolysis / Gluconeogenesis;Biosynthesis of secondary metabolites;Retinol metabolism
MAG229_gene3257	M2_2_1_k97_113610_ORF3223	MAG229	d__Bacteria;p__Bacteroidota;c__Ignavibacteria;o__Ignavibacteriales;f__Melioribacteraceae;g__GCA-2746605;s__Unclassified	660	1628	969	K00001	adh	alcohol dehydrogenase [EC:1.1.1.1]	Metabolism of xenobiotics by cytochrome P450;Naphthalene degradation;Metabolic pathways;Degradation of aromatic compounds;Microbial metabolism in diverse environments;Fatty acid degradation;Chloroalkane and chloroalkene degradation;Tyrosine metabolism;Pyruvate metabolism;Drug metabolism - cytochrome P450;Glycolysis / Gluconeogenesis;Biosynthesis of secondary metabolites;Retinol metabolism
MAG229_gene3485	M2_2_1_k97_1814523_ORF3451	MAG229	d__Bacteria;p__Bacteroidota;c__Ignavibacteria;o__Ignavibacteriales;f__Melioribacteraceae;g__GCA-2746605;s__Unclassified	1380	406	975	K00001	adh	alcohol dehydrogenase [EC:1.1.1.1]	Metabolism of xenobiotics by cytochrome P450;Naphthalene degradation;Metabolic pathways;Degradation of aromatic compounds;Microbial metabolism in diverse environments;Fatty acid degradation;Chloroalkane and chloroalkene degradation;Tyrosine metabolism;Pyruvate metabolism;Drug metabolism - cytochrome P450;Glycolysis / Gluconeogenesis;Biosynthesis of secondary metabolites;Retinol metabolism
MAG23_gene0115	M2_2_3_k97_2339079_ORF114	MAG23	d__Bacteria;p__Actinomycetota;c__Actinomycetia;o__Actinomycetales;f__Dermatophilaceae;g__Phycicoccus;s__Unclassified	16003	15473	531	K00001	adh	alcohol dehydrogenase [EC:1.1.1.1]	Metabolism of xenobiotics by cytochrome P450;Naphthalene degradation;Metabolic pathways;Degradation of aromatic compounds;Microbial metabolism in diverse environments;Fatty acid degradation;Chloroalkane and chloroalkene degradation;Tyrosine metabolism;Pyruvate metabolism;Drug metabolism - cytochrome P450;Glycolysis / Gluconeogenesis;Biosynthesis of secondary metabolites;Retinol metabolism
MAG23_gene1056	M2_2_3_k97_262317_ORF1051	MAG23	d__Bacteria;p__Actinomycetota;c__Actinomycetia;o__Actinomycetales;f__Dermatophilaceae;g__Phycicoccus;s__Unclassified	1096	2082	987	K00001	adh	alcohol dehydrogenase [EC:1.1.1.1]	Metabolism of xenobiotics by cytochrome P450;Naphthalene degradation;Metabolic pathways;Degradation of aromatic compounds;Microbial metabolism in diverse environments;Fatty acid degradation;Chloroalkane and chloroalkene degradation;Tyrosine metabolism;Pyruvate metabolism;Drug metabolism - cytochrome P450;Glycolysis / Gluconeogenesis;Biosynthesis of secondary metabolites;Retinol metabolism
MAG23_gene1309	M2_2_3_k97_1735492_ORF1300	MAG23	d__Bacteria;p__Actinomycetota;c__Actinomycetia;o__Actinomycetales;f__Dermatophilaceae;g__Phycicoccus;s__Unclassified	4322	5356	1035	K00001	adh	alcohol dehydrogenase [EC:1.1.1.1]	Metabolism of xenobiotics by cytochrome P450;Naphthalene degradation;Metabolic pathways;Degradation of aromatic compounds;Microbial metabolism in diverse environments;Fatty acid degradation;Chloroalkane and chloroalkene degradation;Tyrosine metabolism;Pyruvate metabolism;Drug metabolism - cytochrome P450;Glycolysis / Gluconeogenesis;Biosynthesis of secondary metabolites;Retinol metabolism
MAG23_gene1833	M2_2_3_k97_1117018_ORF1818	MAG23	d__Bacteria;p__Actinomycetota;c__Actinomycetia;o__Actinomycetales;f__Dermatophilaceae;g__Phycicoccus;s__Unclassified	2475	1507	969	K00001	adh	alcohol dehydrogenase [EC:1.1.1.1]	Metabolism of xenobiotics by cytochrome P450;Naphthalene degradation;Metabolic pathways;Degradation of aromatic compounds;Microbial metabolism in diverse environments;Fatty acid degradation;Chloroalkane and chloroalkene degradation;Tyrosine metabolism;Pyruvate metabolism;Drug metabolism - cytochrome P450;Glycolysis / Gluconeogenesis;Biosynthesis of secondary metabolites;Retinol metabolism
MAG23_gene2009	M2_2_3_k97_1976408_ORF1990	MAG23	d__Bacteria;p__Actinomycetota;c__Actinomycetia;o__Actinomycetales;f__Dermatophilaceae;g__Phycicoccus;s__Unclassified	3450	2779	672	K00001	adh	alcohol dehydrogenase [EC:1.1.1.1]	Metabolism of xenobiotics by cytochrome P450;Naphthalene degradation;Metabolic pathways;Degradation of aromatic compounds;Microbial metabolism in diverse environments;Fatty acid degradation;Chloroalkane and chloroalkene degradation;Tyrosine metabolism;Pyruvate metabolism;Drug metabolism - cytochrome P450;Glycolysis / Gluconeogenesis;Biosynthesis of secondary metabolites;Retinol metabolism
MAG23_gene2427	M2_2_3_k97_991733_ORF2405	MAG23	d__Bacteria;p__Actinomycetota;c__Actinomycetia;o__Actinomycetales;f__Dermatophilaceae;g__Phycicoccus;s__Unclassified	1744	2466	723	K00001	adh	alcohol dehydrogenase [EC:1.1.1.1]	Metabolism of xenobiotics by cytochrome P450;Naphthalene degradation;Metabolic pathways;Degradation of aromatic compounds;Microbial metabolism in diverse environments;Fatty acid degradation;Chloroalkane and chloroalkene degradation;Tyrosine metabolism;Pyruvate metabolism;Drug metabolism - cytochrome P450;Glycolysis / Gluconeogenesis;Biosynthesis of secondary metabolites;Retinol metabolism
MAG232_gene1079	M1_1_3_k97_279744_ORF1071	MAG232	d__Bacteria;p__Desulfobacterota;c__Syntrophobacteria;o__BM002;f__BM002;g__BM002;s__Unclassified	3090	2017	1074	K00001	adh	alcohol dehydrogenase [EC:1.1.1.1]	Metabolism of xenobiotics by cytochrome P450;Naphthalene degradation;Metabolic pathways;Degradation of aromatic compounds;Microbial metabolism in diverse environments;Fatty acid degradation;Chloroalkane and chloroalkene degradation;Tyrosine metabolism;Pyruvate metabolism;Drug metabolism - cytochrome P450;Glycolysis / Gluconeogenesis;Biosynthesis of secondary metabolites;Retinol metabolism
MAG233_gene0564	M2_2_3_k97_997043_ORF562	MAG233	d__Bacteria;p__Bacteroidota;c__Ignavibacteria;o__Ignavibacteriales;f__Ignavibacteriaceae;g__Unclassified;s__Unclassified	2861	2055	807	K00001	adh	alcohol dehydrogenase [EC:1.1.1.1]	Metabolism of xenobiotics by cytochrome P450;Naphthalene degradation;Metabolic pathways;Degradation of aromatic compounds;Microbial metabolism in diverse environments;Fatty acid degradation;Chloroalkane and chloroalkene degradation;Tyrosine metabolism;Pyruvate metabolism;Drug metabolism - cytochrome P450;Glycolysis / Gluconeogenesis;Biosynthesis of secondary metabolites;Retinol metabolism
MAG233_gene0677	M2_2_3_k97_2230145_ORF674	MAG233	d__Bacteria;p__Bacteroidota;c__Ignavibacteria;o__Ignavibacteriales;f__Ignavibacteriaceae;g__Unclassified;s__Unclassified	1149	2129	981	K00001	adh	alcohol dehydrogenase [EC:1.1.1.1]	Metabolism of xenobiotics by cytochrome P450;Naphthalene degradation;Metabolic pathways;Degradation of aromatic compounds;Microbial metabolism in diverse environments;Fatty acid degradation;Chloroalkane and chloroalkene degradation;Tyrosine metabolism;Pyruvate metabolism;Drug metabolism - cytochrome P450;Glycolysis / Gluconeogenesis;Biosynthesis of secondary metabolites;Retinol metabolism
MAG234_gene1008	CPT_SW_3_k97_212422_ORF1002	MAG234	d__Archaea;p__Thermoproteota;c__Nitrososphaeria;o__Nitrososphaerales;f__Nitrososphaeraceae;g__TH1177;s__Unclassified	4724	3675	1050	K00001	adh	alcohol dehydrogenase [EC:1.1.1.1]	Metabolism of xenobiotics by cytochrome P450;Naphthalene degradation;Metabolic pathways;Degradation of aromatic compounds;Microbial metabolism in diverse environments;Fatty acid degradation;Chloroalkane and chloroalkene degradation;Tyrosine metabolism;Pyruvate metabolism;Drug metabolism - cytochrome P450;Glycolysis / Gluconeogenesis;Biosynthesis of secondary metabolites;Retinol metabolism
MAG234_gene1270	CPT_SW_3_k97_291025_ORF1261	MAG234	d__Archaea;p__Thermoproteota;c__Nitrososphaeria;o__Nitrososphaerales;f__Nitrososphaeraceae;g__TH1177;s__Unclassified	3517	2468	1050	K00001	adh	alcohol dehydrogenase [EC:1.1.1.1]	Metabolism of xenobiotics by cytochrome P450;Naphthalene degradation;Metabolic pathways;Degradation of aromatic compounds;Microbial metabolism in diverse environments;Fatty acid degradation;Chloroalkane and chloroalkene degradation;Tyrosine metabolism;Pyruvate metabolism;Drug metabolism - cytochrome P450;Glycolysis / Gluconeogenesis;Biosynthesis of secondary metabolites;Retinol metabolism
MAG235_gene2238	CPT_MZ_1_k97_581515_ORF2227	MAG235	d__Bacteria;p__Chloroflexota;c__Anaerolineae;o__Promineofilales;f__Promineofilaceae;g__UBA11865;s__Unclassified	997	2	996	K00001	adh	alcohol dehydrogenase [EC:1.1.1.1]	Metabolism of xenobiotics by cytochrome P450;Naphthalene degradation;Metabolic pathways;Degradation of aromatic compounds;Microbial metabolism in diverse environments;Fatty acid degradation;Chloroalkane and chloroalkene degradation;Tyrosine metabolism;Pyruvate metabolism;Drug metabolism - cytochrome P450;Glycolysis / Gluconeogenesis;Biosynthesis of secondary metabolites;Retinol metabolism
MAG235_gene3663	CPT_MZ_1_k97_558687_ORF3647	MAG235	d__Bacteria;p__Chloroflexota;c__Anaerolineae;o__Promineofilales;f__Promineofilaceae;g__UBA11865;s__Unclassified	1074	52	1023	K00001	adh	alcohol dehydrogenase [EC:1.1.1.1]	Metabolism of xenobiotics by cytochrome P450;Naphthalene degradation;Metabolic pathways;Degradation of aromatic compounds;Microbial metabolism in diverse environments;Fatty acid degradation;Chloroalkane and chloroalkene degradation;Tyrosine metabolism;Pyruvate metabolism;Drug metabolism - cytochrome P450;Glycolysis / Gluconeogenesis;Biosynthesis of secondary metabolites;Retinol metabolism
MAG235_gene4311	CPT_MZ_1_k97_1092691_ORF4291	MAG235	d__Bacteria;p__Chloroflexota;c__Anaerolineae;o__Promineofilales;f__Promineofilaceae;g__UBA11865;s__Unclassified	188	1210	1023	K00001	adh	alcohol dehydrogenase [EC:1.1.1.1]	Metabolism of xenobiotics by cytochrome P450;Naphthalene degradation;Metabolic pathways;Degradation of aromatic compounds;Microbial metabolism in diverse environments;Fatty acid degradation;Chloroalkane and chloroalkene degradation;Tyrosine metabolism;Pyruvate metabolism;Drug metabolism - cytochrome P450;Glycolysis / Gluconeogenesis;Biosynthesis of secondary metabolites;Retinol metabolism
MAG236_gene0809	FG_WR_2_k97_592289_ORF793	MAG236	d__Bacteria;p__Bacteroidota;c__Bacteroidia;o__Bacteroidales;f__F082;g__UBA4459;s__Unclassified	5223	6197	975	K00001	adh	alcohol dehydrogenase [EC:1.1.1.1]	Metabolism of xenobiotics by cytochrome P450;Naphthalene degradation;Metabolic pathways;Degradation of aromatic compounds;Microbial metabolism in diverse environments;Fatty acid degradation;Chloroalkane and chloroalkene degradation;Tyrosine metabolism;Pyruvate metabolism;Drug metabolism - cytochrome P450;Glycolysis / Gluconeogenesis;Biosynthesis of secondary metabolites;Retinol metabolism
MAG237_gene1811	DY_3_k97_585795_ORF1794	MAG237	d__Bacteria;p__Actinomycetota;c__Acidimicrobiia;o__UBA5794;f__JAHEDJ01;g__JAHEDJ01;s__Unclassified	9630	8659	972	K00001	adh	alcohol dehydrogenase [EC:1.1.1.1]	Metabolism of xenobiotics by cytochrome P450;Naphthalene degradation;Metabolic pathways;Degradation of aromatic compounds;Microbial metabolism in diverse environments;Fatty acid degradation;Chloroalkane and chloroalkene degradation;Tyrosine metabolism;Pyruvate metabolism;Drug metabolism - cytochrome P450;Glycolysis / Gluconeogenesis;Biosynthesis of secondary metabolites;Retinol metabolism
MAG238_gene1865	M2_2_3_k97_1619021_ORF1855	MAG238	d__Bacteria;p__Bacteroidota;c__Ignavibacteria;o__Ignavibacteriales;f__Melioribacteraceae;g__GCA-2746605;s__Unclassified	1268	294	975	K00001	adh	alcohol dehydrogenase [EC:1.1.1.1]	Metabolism of xenobiotics by cytochrome P450;Naphthalene degradation;Metabolic pathways;Degradation of aromatic compounds;Microbial metabolism in diverse environments;Fatty acid degradation;Chloroalkane and chloroalkene degradation;Tyrosine metabolism;Pyruvate metabolism;Drug metabolism - cytochrome P450;Glycolysis / Gluconeogenesis;Biosynthesis of secondary metabolites;Retinol metabolism
MAG238_gene1870	M2_2_3_k97_1619021_ORF1860	MAG238	d__Bacteria;p__Bacteroidota;c__Ignavibacteria;o__Ignavibacteriales;f__Melioribacteraceae;g__GCA-2746605;s__Unclassified	4111	3143	969	K00001	adh	alcohol dehydrogenase [EC:1.1.1.1]	Metabolism of xenobiotics by cytochrome P450;Naphthalene degradation;Metabolic pathways;Degradation of aromatic compounds;Microbial metabolism in diverse environments;Fatty acid degradation;Chloroalkane and chloroalkene degradation;Tyrosine metabolism;Pyruvate metabolism;Drug metabolism - cytochrome P450;Glycolysis / Gluconeogenesis;Biosynthesis of secondary metabolites;Retinol metabolism
MAG238_gene1871	M2_2_3_k97_1619021_ORF1861	MAG238	d__Bacteria;p__Bacteroidota;c__Ignavibacteria;o__Ignavibacteriales;f__Melioribacteraceae;g__GCA-2746605;s__Unclassified	4770	4132	639	K00001	adh	alcohol dehydrogenase [EC:1.1.1.1]	Metabolism of xenobiotics by cytochrome P450;Naphthalene degradation;Metabolic pathways;Degradation of aromatic compounds;Microbial metabolism in diverse environments;Fatty acid degradation;Chloroalkane and chloroalkene degradation;Tyrosine metabolism;Pyruvate metabolism;Drug metabolism - cytochrome P450;Glycolysis / Gluconeogenesis;Biosynthesis of secondary metabolites;Retinol metabolism
MAG239_gene0682	FG_SC_3_k97_904016_ORF682	MAG239	d__Bacteria;p__Myxococcota;c__Polyangia;o__Haliangiales;f__Haliangiaceae;g__Unclassified;s__Unclassified	7067	6066	1002	K00001	adh	alcohol dehydrogenase [EC:1.1.1.1]	Metabolism of xenobiotics by cytochrome P450;Naphthalene degradation;Metabolic pathways;Degradation of aromatic compounds;Microbial metabolism in diverse environments;Fatty acid degradation;Chloroalkane and chloroalkene degradation;Tyrosine metabolism;Pyruvate metabolism;Drug metabolism - cytochrome P450;Glycolysis / Gluconeogenesis;Biosynthesis of secondary metabolites;Retinol metabolism
MAG239_gene1607	FG_SC_3_k97_587874_ORF1601	MAG239	d__Bacteria;p__Myxococcota;c__Polyangia;o__Haliangiales;f__Haliangiaceae;g__Unclassified;s__Unclassified	2603	1644	960	K00001	adh	alcohol dehydrogenase [EC:1.1.1.1]	Metabolism of xenobiotics by cytochrome P450;Naphthalene degradation;Metabolic pathways;Degradation of aromatic compounds;Microbial metabolism in diverse environments;Fatty acid degradation;Chloroalkane and chloroalkene degradation;Tyrosine metabolism;Pyruvate metabolism;Drug metabolism - cytochrome P450;Glycolysis / Gluconeogenesis;Biosynthesis of secondary metabolites;Retinol metabolism
MAG239_gene2138	FG_SC_3_k97_895444_ORF2130	MAG239	d__Bacteria;p__Myxococcota;c__Polyangia;o__Haliangiales;f__Haliangiaceae;g__Unclassified;s__Unclassified	258	1274	1017	K00001	adh	alcohol dehydrogenase [EC:1.1.1.1]	Metabolism of xenobiotics by cytochrome P450;Naphthalene degradation;Metabolic pathways;Degradation of aromatic compounds;Microbial metabolism in diverse environments;Fatty acid degradation;Chloroalkane and chloroalkene degradation;Tyrosine metabolism;Pyruvate metabolism;Drug metabolism - cytochrome P450;Glycolysis / Gluconeogenesis;Biosynthesis of secondary metabolites;Retinol metabolism
MAG239_gene3144	FG_SC_3_k97_656143_ORF3126	MAG239	d__Bacteria;p__Myxococcota;c__Polyangia;o__Haliangiales;f__Haliangiaceae;g__Unclassified;s__Unclassified	1663	707	957	K00001	adh	alcohol dehydrogenase [EC:1.1.1.1]	Metabolism of xenobiotics by cytochrome P450;Naphthalene degradation;Metabolic pathways;Degradation of aromatic compounds;Microbial metabolism in diverse environments;Fatty acid degradation;Chloroalkane and chloroalkene degradation;Tyrosine metabolism;Pyruvate metabolism;Drug metabolism - cytochrome P450;Glycolysis / Gluconeogenesis;Biosynthesis of secondary metabolites;Retinol metabolism
MAG24_gene0572	CPT_MZ_1_k97_905901_ORF566	MAG24	d__Archaea;p__Thermoproteota;c__Nitrososphaeria;o__Nitrososphaerales;f__Nitrososphaeraceae;g__TH1177;s__Unclassified	1059	1217	159	K00001	adh	alcohol dehydrogenase [EC:1.1.1.1]	Metabolism of xenobiotics by cytochrome P450;Naphthalene degradation;Metabolic pathways;Degradation of aromatic compounds;Microbial metabolism in diverse environments;Fatty acid degradation;Chloroalkane and chloroalkene degradation;Tyrosine metabolism;Pyruvate metabolism;Drug metabolism - cytochrome P450;Glycolysis / Gluconeogenesis;Biosynthesis of secondary metabolites;Retinol metabolism
MAG24_gene0573	CPT_MZ_1_k97_905901_ORF567	MAG24	d__Archaea;p__Thermoproteota;c__Nitrososphaeria;o__Nitrososphaerales;f__Nitrososphaeraceae;g__TH1177;s__Unclassified	1296	1802	507	K00001	adh	alcohol dehydrogenase [EC:1.1.1.1]	Metabolism of xenobiotics by cytochrome P450;Naphthalene degradation;Metabolic pathways;Degradation of aromatic compounds;Microbial metabolism in diverse environments;Fatty acid degradation;Chloroalkane and chloroalkene degradation;Tyrosine metabolism;Pyruvate metabolism;Drug metabolism - cytochrome P450;Glycolysis / Gluconeogenesis;Biosynthesis of secondary metabolites;Retinol metabolism
MAG24_gene1327	CPT_MZ_1_k97_246308_ORF1315	MAG24	d__Archaea;p__Thermoproteota;c__Nitrososphaeria;o__Nitrososphaerales;f__Nitrososphaeraceae;g__TH1177;s__Unclassified	4162	5232	1071	K00001	adh	alcohol dehydrogenase [EC:1.1.1.1]	Metabolism of xenobiotics by cytochrome P450;Naphthalene degradation;Metabolic pathways;Degradation of aromatic compounds;Microbial metabolism in diverse environments;Fatty acid degradation;Chloroalkane and chloroalkene degradation;Tyrosine metabolism;Pyruvate metabolism;Drug metabolism - cytochrome P450;Glycolysis / Gluconeogenesis;Biosynthesis of secondary metabolites;Retinol metabolism
MAG24_gene1895	CPT_MZ_1_k97_388607_ORF1871	MAG24	d__Archaea;p__Thermoproteota;c__Nitrososphaeria;o__Nitrososphaerales;f__Nitrososphaeraceae;g__TH1177;s__Unclassified	1172	2221	1050	K00001	adh	alcohol dehydrogenase [EC:1.1.1.1]	Metabolism of xenobiotics by cytochrome P450;Naphthalene degradation;Metabolic pathways;Degradation of aromatic compounds;Microbial metabolism in diverse environments;Fatty acid degradation;Chloroalkane and chloroalkene degradation;Tyrosine metabolism;Pyruvate metabolism;Drug metabolism - cytochrome P450;Glycolysis / Gluconeogenesis;Biosynthesis of secondary metabolites;Retinol metabolism
MAG240_gene0487	FG_WR_1_k97_1193823_ORF479	MAG240	d__Bacteria;p__Actinomycetota;c__Actinomycetia;o__Actinomycetales;f__Dermatophilaceae;g__Phycicoccus;s__Unclassified	125	1255	1131	K00001	adh	alcohol dehydrogenase [EC:1.1.1.1]	Metabolism of xenobiotics by cytochrome P450;Naphthalene degradation;Metabolic pathways;Degradation of aromatic compounds;Microbial metabolism in diverse environments;Fatty acid degradation;Chloroalkane and chloroalkene degradation;Tyrosine metabolism;Pyruvate metabolism;Drug metabolism - cytochrome P450;Glycolysis / Gluconeogenesis;Biosynthesis of secondary metabolites;Retinol metabolism
MAG240_gene1324	FG_WR_1_k97_566325_ORF1309	MAG240	d__Bacteria;p__Actinomycetota;c__Actinomycetia;o__Actinomycetales;f__Dermatophilaceae;g__Phycicoccus;s__Unclassified	1610	2578	969	K00001	adh	alcohol dehydrogenase [EC:1.1.1.1]	Metabolism of xenobiotics by cytochrome P450;Naphthalene degradation;Metabolic pathways;Degradation of aromatic compounds;Microbial metabolism in diverse environments;Fatty acid degradation;Chloroalkane and chloroalkene degradation;Tyrosine metabolism;Pyruvate metabolism;Drug metabolism - cytochrome P450;Glycolysis / Gluconeogenesis;Biosynthesis of secondary metabolites;Retinol metabolism
MAG240_gene2625	FG_WR_1_k97_611884_ORF2602	MAG240	d__Bacteria;p__Actinomycetota;c__Actinomycetia;o__Actinomycetales;f__Dermatophilaceae;g__Phycicoccus;s__Unclassified	1844	2461	618	K00001	adh	alcohol dehydrogenase [EC:1.1.1.1]	Metabolism of xenobiotics by cytochrome P450;Naphthalene degradation;Metabolic pathways;Degradation of aromatic compounds;Microbial metabolism in diverse environments;Fatty acid degradation;Chloroalkane and chloroalkene degradation;Tyrosine metabolism;Pyruvate metabolism;Drug metabolism - cytochrome P450;Glycolysis / Gluconeogenesis;Biosynthesis of secondary metabolites;Retinol metabolism
MAG240_gene2653	FG_WR_1_k97_939645_ORF2630	MAG240	d__Bacteria;p__Actinomycetota;c__Actinomycetia;o__Actinomycetales;f__Dermatophilaceae;g__Phycicoccus;s__Unclassified	1615	638	978	K00001	adh	alcohol dehydrogenase [EC:1.1.1.1]	Metabolism of xenobiotics by cytochrome P450;Naphthalene degradation;Metabolic pathways;Degradation of aromatic compounds;Microbial metabolism in diverse environments;Fatty acid degradation;Chloroalkane and chloroalkene degradation;Tyrosine metabolism;Pyruvate metabolism;Drug metabolism - cytochrome P450;Glycolysis / Gluconeogenesis;Biosynthesis of secondary metabolites;Retinol metabolism
MAG240_gene2662	FG_WR_1_k97_1074235_ORF2639	MAG240	d__Bacteria;p__Actinomycetota;c__Actinomycetia;o__Actinomycetales;f__Dermatophilaceae;g__Phycicoccus;s__Unclassified	1024	2	1023	K00001	adh	alcohol dehydrogenase [EC:1.1.1.1]	Metabolism of xenobiotics by cytochrome P450;Naphthalene degradation;Metabolic pathways;Degradation of aromatic compounds;Microbial metabolism in diverse environments;Fatty acid degradation;Chloroalkane and chloroalkene degradation;Tyrosine metabolism;Pyruvate metabolism;Drug metabolism - cytochrome P450;Glycolysis / Gluconeogenesis;Biosynthesis of secondary metabolites;Retinol metabolism
MAG240_gene2769	FG_WR_1_k97_170650_ORF2745	MAG240	d__Bacteria;p__Actinomycetota;c__Actinomycetia;o__Actinomycetales;f__Dermatophilaceae;g__Phycicoccus;s__Unclassified	3	953	951	K00001	adh	alcohol dehydrogenase [EC:1.1.1.1]	Metabolism of xenobiotics by cytochrome P450;Naphthalene degradation;Metabolic pathways;Degradation of aromatic compounds;Microbial metabolism in diverse environments;Fatty acid degradation;Chloroalkane and chloroalkene degradation;Tyrosine metabolism;Pyruvate metabolism;Drug metabolism - cytochrome P450;Glycolysis / Gluconeogenesis;Biosynthesis of secondary metabolites;Retinol metabolism
MAG241_gene0620	M1_2_2_k97_623508_ORF616	MAG241	d__Bacteria;p__Pseudomonadota;c__Gammaproteobacteria;o__XN24;f__XN24;g__JAHEFR01;s__Unclassified	830	3	828	K00001	adh	alcohol dehydrogenase [EC:1.1.1.1]	Metabolism of xenobiotics by cytochrome P450;Naphthalene degradation;Metabolic pathways;Degradation of aromatic compounds;Microbial metabolism in diverse environments;Fatty acid degradation;Chloroalkane and chloroalkene degradation;Tyrosine metabolism;Pyruvate metabolism;Drug metabolism - cytochrome P450;Glycolysis / Gluconeogenesis;Biosynthesis of secondary metabolites;Retinol metabolism
MAG241_gene0934	M1_2_2_k97_921882_ORF925	MAG241	d__Bacteria;p__Pseudomonadota;c__Gammaproteobacteria;o__XN24;f__XN24;g__JAHEFR01;s__Unclassified	3	398	396	K00001	adh	alcohol dehydrogenase [EC:1.1.1.1]	Metabolism of xenobiotics by cytochrome P450;Naphthalene degradation;Metabolic pathways;Degradation of aromatic compounds;Microbial metabolism in diverse environments;Fatty acid degradation;Chloroalkane and chloroalkene degradation;Tyrosine metabolism;Pyruvate metabolism;Drug metabolism - cytochrome P450;Glycolysis / Gluconeogenesis;Biosynthesis of secondary metabolites;Retinol metabolism
MAG241_gene1941	M1_2_2_k97_52730_ORF1926	MAG241	d__Bacteria;p__Pseudomonadota;c__Gammaproteobacteria;o__XN24;f__XN24;g__JAHEFR01;s__Unclassified	728	3	726	K00001	adh	alcohol dehydrogenase [EC:1.1.1.1]	Metabolism of xenobiotics by cytochrome P450;Naphthalene degradation;Metabolic pathways;Degradation of aromatic compounds;Microbial metabolism in diverse environments;Fatty acid degradation;Chloroalkane and chloroalkene degradation;Tyrosine metabolism;Pyruvate metabolism;Drug metabolism - cytochrome P450;Glycolysis / Gluconeogenesis;Biosynthesis of secondary metabolites;Retinol metabolism
MAG242_gene0278	M2_1_3_k97_1079739_ORF276	MAG242	d__Bacteria;p__Pseudomonadota;c__Alphaproteobacteria;o__Rhizobiales;f__Aestuariivirgaceae;g__Anderseniella;s__Unclassified	2960	1773	1188	K00001	adh	alcohol dehydrogenase [EC:1.1.1.1]	Metabolism of xenobiotics by cytochrome P450;Naphthalene degradation;Metabolic pathways;Degradation of aromatic compounds;Microbial metabolism in diverse environments;Fatty acid degradation;Chloroalkane and chloroalkene degradation;Tyrosine metabolism;Pyruvate metabolism;Drug metabolism - cytochrome P450;Glycolysis / Gluconeogenesis;Biosynthesis of secondary metabolites;Retinol metabolism
MAG242_gene2072	M2_1_3_k97_612462_ORF2059	MAG242	d__Bacteria;p__Pseudomonadota;c__Alphaproteobacteria;o__Rhizobiales;f__Aestuariivirgaceae;g__Anderseniella;s__Unclassified	2	535	534	K00001	adh	alcohol dehydrogenase [EC:1.1.1.1]	Metabolism of xenobiotics by cytochrome P450;Naphthalene degradation;Metabolic pathways;Degradation of aromatic compounds;Microbial metabolism in diverse environments;Fatty acid degradation;Chloroalkane and chloroalkene degradation;Tyrosine metabolism;Pyruvate metabolism;Drug metabolism - cytochrome P450;Glycolysis / Gluconeogenesis;Biosynthesis of secondary metabolites;Retinol metabolism
MAG243_gene2192	M2_1_1_k97_1859140_ORF2174	MAG243	d__Bacteria;p__Bacteroidota;c__Bacteroidia;o__Bacteroidales;f__VadinHA17;g__SR-FBR-E99;s__Unclassified	1628	525	1104	K00001	adh	alcohol dehydrogenase [EC:1.1.1.1]	Metabolism of xenobiotics by cytochrome P450;Naphthalene degradation;Metabolic pathways;Degradation of aromatic compounds;Microbial metabolism in diverse environments;Fatty acid degradation;Chloroalkane and chloroalkene degradation;Tyrosine metabolism;Pyruvate metabolism;Drug metabolism - cytochrome P450;Glycolysis / Gluconeogenesis;Biosynthesis of secondary metabolites;Retinol metabolism
MAG244_gene0808	M2_2_3_k97_1417534_ORF791	MAG244	d__Bacteria;p__Myxococcota;c__Polyangia;o__GCA-2747355;f__Unclassified;g__Unclassified;s__Unclassified	1228	2328	1101	K00001	adh	alcohol dehydrogenase [EC:1.1.1.1]	Metabolism of xenobiotics by cytochrome P450;Naphthalene degradation;Metabolic pathways;Degradation of aromatic compounds;Microbial metabolism in diverse environments;Fatty acid degradation;Chloroalkane and chloroalkene degradation;Tyrosine metabolism;Pyruvate metabolism;Drug metabolism - cytochrome P450;Glycolysis / Gluconeogenesis;Biosynthesis of secondary metabolites;Retinol metabolism
MAG246_gene0358	M2_1_1_k97_277420_ORF352	MAG246	d__Bacteria;p__Pseudomonadota;c__Gammaproteobacteria;o__Chromatiales;f__Sedimenticolaceae;g__Sva-25;s__Unclassified	3190	4386	1197	K00001	adh	alcohol dehydrogenase [EC:1.1.1.1]	Metabolism of xenobiotics by cytochrome P450;Naphthalene degradation;Metabolic pathways;Degradation of aromatic compounds;Microbial metabolism in diverse environments;Fatty acid degradation;Chloroalkane and chloroalkene degradation;Tyrosine metabolism;Pyruvate metabolism;Drug metabolism - cytochrome P450;Glycolysis / Gluconeogenesis;Biosynthesis of secondary metabolites;Retinol metabolism
MAG247_gene1625	M2_2_1_k97_95341_ORF1616	MAG247	d__Bacteria;p__Desulfobacterota;c__Desulfobacteria;o__Desulfobacterales;f__B30-G6;g__Unclassified;s__Unclassified	4031	2985	1047	K00001	adh	alcohol dehydrogenase [EC:1.1.1.1]	Metabolism of xenobiotics by cytochrome P450;Naphthalene degradation;Metabolic pathways;Degradation of aromatic compounds;Microbial metabolism in diverse environments;Fatty acid degradation;Chloroalkane and chloroalkene degradation;Tyrosine metabolism;Pyruvate metabolism;Drug metabolism - cytochrome P450;Glycolysis / Gluconeogenesis;Biosynthesis of secondary metabolites;Retinol metabolism
MAG247_gene1767	M2_2_1_k97_1658639_ORF1758	MAG247	d__Bacteria;p__Desulfobacterota;c__Desulfobacteria;o__Desulfobacterales;f__B30-G6;g__Unclassified;s__Unclassified	2624	3631	1008	K00001	adh	alcohol dehydrogenase [EC:1.1.1.1]	Metabolism of xenobiotics by cytochrome P450;Naphthalene degradation;Metabolic pathways;Degradation of aromatic compounds;Microbial metabolism in diverse environments;Fatty acid degradation;Chloroalkane and chloroalkene degradation;Tyrosine metabolism;Pyruvate metabolism;Drug metabolism - cytochrome P450;Glycolysis / Gluconeogenesis;Biosynthesis of secondary metabolites;Retinol metabolism
MAG248_gene0769	M3_1_1_k97_992587_ORF767	MAG248	d__Bacteria;p__Planctomycetota;c__Planctomycetia;o__Pirellulales;f__Pirellulaceae;g__JAGQPK01;s__Unclassified	457	2	456	K00001	adh	alcohol dehydrogenase [EC:1.1.1.1]	Metabolism of xenobiotics by cytochrome P450;Naphthalene degradation;Metabolic pathways;Degradation of aromatic compounds;Microbial metabolism in diverse environments;Fatty acid degradation;Chloroalkane and chloroalkene degradation;Tyrosine metabolism;Pyruvate metabolism;Drug metabolism - cytochrome P450;Glycolysis / Gluconeogenesis;Biosynthesis of secondary metabolites;Retinol metabolism
MAG249_gene0799	M1_2_1_k97_228232_ORF787	MAG249	d__Bacteria;p__Pseudomonadota;c__Alphaproteobacteria;o__Rhizobiales;f__Methyloligellaceae;g__Methyloceanibacter;s__Unclassified	3041	2019	1023	K00001	adh	alcohol dehydrogenase [EC:1.1.1.1]	Metabolism of xenobiotics by cytochrome P450;Naphthalene degradation;Metabolic pathways;Degradation of aromatic compounds;Microbial metabolism in diverse environments;Fatty acid degradation;Chloroalkane and chloroalkene degradation;Tyrosine metabolism;Pyruvate metabolism;Drug metabolism - cytochrome P450;Glycolysis / Gluconeogenesis;Biosynthesis of secondary metabolites;Retinol metabolism
MAG25_gene0636	M3_2_1_k97_1145814_ORF631	MAG25	d__Bacteria;p__Actinomycetota;c__Actinomycetia;o__Jiangellales;f__Unclassified;g__Unclassified;s__Unclassified	2241	3233	993	K00001	adh	alcohol dehydrogenase [EC:1.1.1.1]	Metabolism of xenobiotics by cytochrome P450;Naphthalene degradation;Metabolic pathways;Degradation of aromatic compounds;Microbial metabolism in diverse environments;Fatty acid degradation;Chloroalkane and chloroalkene degradation;Tyrosine metabolism;Pyruvate metabolism;Drug metabolism - cytochrome P450;Glycolysis / Gluconeogenesis;Biosynthesis of secondary metabolites;Retinol metabolism
MAG25_gene0817	M3_2_1_k97_646101_ORF810	MAG25	d__Bacteria;p__Actinomycetota;c__Actinomycetia;o__Jiangellales;f__Unclassified;g__Unclassified;s__Unclassified	1604	585	1020	K00001	adh	alcohol dehydrogenase [EC:1.1.1.1]	Metabolism of xenobiotics by cytochrome P450;Naphthalene degradation;Metabolic pathways;Degradation of aromatic compounds;Microbial metabolism in diverse environments;Fatty acid degradation;Chloroalkane and chloroalkene degradation;Tyrosine metabolism;Pyruvate metabolism;Drug metabolism - cytochrome P450;Glycolysis / Gluconeogenesis;Biosynthesis of secondary metabolites;Retinol metabolism
MAG250_gene0979	CPT_MZ_3_k97_74042_ORF973	MAG250	d__Archaea;p__Thermoproteota;c__Nitrososphaeria;o__Nitrososphaerales;f__Nitrososphaeraceae;g__TH1177;s__Unclassified	1	444	444	K00001	adh	alcohol dehydrogenase [EC:1.1.1.1]	Metabolism of xenobiotics by cytochrome P450;Naphthalene degradation;Metabolic pathways;Degradation of aromatic compounds;Microbial metabolism in diverse environments;Fatty acid degradation;Chloroalkane and chloroalkene degradation;Tyrosine metabolism;Pyruvate metabolism;Drug metabolism - cytochrome P450;Glycolysis / Gluconeogenesis;Biosynthesis of secondary metabolites;Retinol metabolism
MAG250_gene1103	CPT_MZ_3_k97_81461_ORF1096	MAG250	d__Archaea;p__Thermoproteota;c__Nitrososphaeria;o__Nitrososphaerales;f__Nitrososphaeraceae;g__TH1177;s__Unclassified	159	1208	1050	K00001	adh	alcohol dehydrogenase [EC:1.1.1.1]	Metabolism of xenobiotics by cytochrome P450;Naphthalene degradation;Metabolic pathways;Degradation of aromatic compounds;Microbial metabolism in diverse environments;Fatty acid degradation;Chloroalkane and chloroalkene degradation;Tyrosine metabolism;Pyruvate metabolism;Drug metabolism - cytochrome P450;Glycolysis / Gluconeogenesis;Biosynthesis of secondary metabolites;Retinol metabolism
MAG250_gene3310	CPT_MZ_3_k97_863018_ORF3285	MAG250	d__Archaea;p__Thermoproteota;c__Nitrososphaeria;o__Nitrososphaerales;f__Nitrososphaeraceae;g__TH1177;s__Unclassified	533	1021	489	K00001	adh	alcohol dehydrogenase [EC:1.1.1.1]	Metabolism of xenobiotics by cytochrome P450;Naphthalene degradation;Metabolic pathways;Degradation of aromatic compounds;Microbial metabolism in diverse environments;Fatty acid degradation;Chloroalkane and chloroalkene degradation;Tyrosine metabolism;Pyruvate metabolism;Drug metabolism - cytochrome P450;Glycolysis / Gluconeogenesis;Biosynthesis of secondary metabolites;Retinol metabolism
MAG254_gene1381	CPT_LW_1_k97_157039_ORF1379	MAG254	d__Bacteria;p__Chloroflexota;c__Anaerolineae;o__Promineofilales;f__Promineofilaceae;g__UBA11865;s__Unclassified	2479	1511	969	K00001	adh	alcohol dehydrogenase [EC:1.1.1.1]	Metabolism of xenobiotics by cytochrome P450;Naphthalene degradation;Metabolic pathways;Degradation of aromatic compounds;Microbial metabolism in diverse environments;Fatty acid degradation;Chloroalkane and chloroalkene degradation;Tyrosine metabolism;Pyruvate metabolism;Drug metabolism - cytochrome P450;Glycolysis / Gluconeogenesis;Biosynthesis of secondary metabolites;Retinol metabolism
MAG254_gene2249	CPT_LW_1_k97_103857_ORF2236	MAG254	d__Bacteria;p__Chloroflexota;c__Anaerolineae;o__Promineofilales;f__Promineofilaceae;g__UBA11865;s__Unclassified	2075	1617	459	K00001	adh	alcohol dehydrogenase [EC:1.1.1.1]	Metabolism of xenobiotics by cytochrome P450;Naphthalene degradation;Metabolic pathways;Degradation of aromatic compounds;Microbial metabolism in diverse environments;Fatty acid degradation;Chloroalkane and chloroalkene degradation;Tyrosine metabolism;Pyruvate metabolism;Drug metabolism - cytochrome P450;Glycolysis / Gluconeogenesis;Biosynthesis of secondary metabolites;Retinol metabolism
MAG255_gene0578	M3_2_1_k97_259889_ORF574	MAG255	d__Bacteria;p__Actinomycetota;c__Acidimicrobiia;o__Acidimicrobiales;f__Ilumatobacteraceae;g__Ilumatobacter;s__Unclassified	4600	5799	1200	K00001	adh	alcohol dehydrogenase [EC:1.1.1.1]	Metabolism of xenobiotics by cytochrome P450;Naphthalene degradation;Metabolic pathways;Degradation of aromatic compounds;Microbial metabolism in diverse environments;Fatty acid degradation;Chloroalkane and chloroalkene degradation;Tyrosine metabolism;Pyruvate metabolism;Drug metabolism - cytochrome P450;Glycolysis / Gluconeogenesis;Biosynthesis of secondary metabolites;Retinol metabolism
MAG255_gene1285	M3_2_1_k97_499767_ORF1278	MAG255	d__Bacteria;p__Actinomycetota;c__Acidimicrobiia;o__Acidimicrobiales;f__Ilumatobacteraceae;g__Ilumatobacter;s__Unclassified	2901	1825	1077	K00001	adh	alcohol dehydrogenase [EC:1.1.1.1]	Metabolism of xenobiotics by cytochrome P450;Naphthalene degradation;Metabolic pathways;Degradation of aromatic compounds;Microbial metabolism in diverse environments;Fatty acid degradation;Chloroalkane and chloroalkene degradation;Tyrosine metabolism;Pyruvate metabolism;Drug metabolism - cytochrome P450;Glycolysis / Gluconeogenesis;Biosynthesis of secondary metabolites;Retinol metabolism
MAG256_gene0634	M3_1_2_k97_1295355_ORF626	MAG256	d__Bacteria;p__Pseudomonadota;c__Gammaproteobacteria;o__XN24;f__XN24;g__Unclassified;s__Unclassified	1846	698	1149	K00001	adh	alcohol dehydrogenase [EC:1.1.1.1]	Metabolism of xenobiotics by cytochrome P450;Naphthalene degradation;Metabolic pathways;Degradation of aromatic compounds;Microbial metabolism in diverse environments;Fatty acid degradation;Chloroalkane and chloroalkene degradation;Tyrosine metabolism;Pyruvate metabolism;Drug metabolism - cytochrome P450;Glycolysis / Gluconeogenesis;Biosynthesis of secondary metabolites;Retinol metabolism
MAG256_gene1204	M3_1_2_k97_736200_ORF1194	MAG256	d__Bacteria;p__Pseudomonadota;c__Gammaproteobacteria;o__XN24;f__XN24;g__Unclassified;s__Unclassified	1357	2259	903	K00001	adh	alcohol dehydrogenase [EC:1.1.1.1]	Metabolism of xenobiotics by cytochrome P450;Naphthalene degradation;Metabolic pathways;Degradation of aromatic compounds;Microbial metabolism in diverse environments;Fatty acid degradation;Chloroalkane and chloroalkene degradation;Tyrosine metabolism;Pyruvate metabolism;Drug metabolism - cytochrome P450;Glycolysis / Gluconeogenesis;Biosynthesis of secondary metabolites;Retinol metabolism
MAG256_gene1856	M3_1_2_k97_364732_ORF1841	MAG256	d__Bacteria;p__Pseudomonadota;c__Gammaproteobacteria;o__XN24;f__XN24;g__Unclassified;s__Unclassified	1798	611	1188	K00001	adh	alcohol dehydrogenase [EC:1.1.1.1]	Metabolism of xenobiotics by cytochrome P450;Naphthalene degradation;Metabolic pathways;Degradation of aromatic compounds;Microbial metabolism in diverse environments;Fatty acid degradation;Chloroalkane and chloroalkene degradation;Tyrosine metabolism;Pyruvate metabolism;Drug metabolism - cytochrome P450;Glycolysis / Gluconeogenesis;Biosynthesis of secondary metabolites;Retinol metabolism
MAG257_gene1599	M3_2_2_k97_709390_ORF1578	MAG257	d__Bacteria;p__Actinomycetota;c__Actinomycetia;o__Jiangellales;f__Unclassified;g__Unclassified;s__Unclassified	740	3	738	K00001	adh	alcohol dehydrogenase [EC:1.1.1.1]	Metabolism of xenobiotics by cytochrome P450;Naphthalene degradation;Metabolic pathways;Degradation of aromatic compounds;Microbial metabolism in diverse environments;Fatty acid degradation;Chloroalkane and chloroalkene degradation;Tyrosine metabolism;Pyruvate metabolism;Drug metabolism - cytochrome P450;Glycolysis / Gluconeogenesis;Biosynthesis of secondary metabolites;Retinol metabolism
MAG257_gene2144	M3_2_2_k97_160414_ORF2113	MAG257	d__Bacteria;p__Actinomycetota;c__Actinomycetia;o__Jiangellales;f__Unclassified;g__Unclassified;s__Unclassified	1815	1441	375	K00001	adh	alcohol dehydrogenase [EC:1.1.1.1]	Metabolism of xenobiotics by cytochrome P450;Naphthalene degradation;Metabolic pathways;Degradation of aromatic compounds;Microbial metabolism in diverse environments;Fatty acid degradation;Chloroalkane and chloroalkene degradation;Tyrosine metabolism;Pyruvate metabolism;Drug metabolism - cytochrome P450;Glycolysis / Gluconeogenesis;Biosynthesis of secondary metabolites;Retinol metabolism
MAG258_gene0425	M1_2_1_k97_46026_ORF423	MAG258	d__Bacteria;p__Desulfobacterota;c__Desulfobulbia;o__Desulfobulbales;f__Desulfocapsaceae;g__JABDQA01;s__Unclassified	7103	8284	1182	K00001	adh	alcohol dehydrogenase [EC:1.1.1.1]	Metabolism of xenobiotics by cytochrome P450;Naphthalene degradation;Metabolic pathways;Degradation of aromatic compounds;Microbial metabolism in diverse environments;Fatty acid degradation;Chloroalkane and chloroalkene degradation;Tyrosine metabolism;Pyruvate metabolism;Drug metabolism - cytochrome P450;Glycolysis / Gluconeogenesis;Biosynthesis of secondary metabolites;Retinol metabolism
MAG258_gene1035	M1_2_1_k97_33895_ORF1024	MAG258	d__Bacteria;p__Desulfobacterota;c__Desulfobulbia;o__Desulfobulbales;f__Desulfocapsaceae;g__JABDQA01;s__Unclassified	3534	4574	1041	K00001	adh	alcohol dehydrogenase [EC:1.1.1.1]	Metabolism of xenobiotics by cytochrome P450;Naphthalene degradation;Metabolic pathways;Degradation of aromatic compounds;Microbial metabolism in diverse environments;Fatty acid degradation;Chloroalkane and chloroalkene degradation;Tyrosine metabolism;Pyruvate metabolism;Drug metabolism - cytochrome P450;Glycolysis / Gluconeogenesis;Biosynthesis of secondary metabolites;Retinol metabolism
MAG259_gene0818	M2_1_1_k97_1748434_ORF809	MAG259	d__Bacteria;p__Pseudomonadota;c__Alphaproteobacteria;o__Rhizobiales;f__Methyloligellaceae;g__Methyloceanibacter;s__Unclassified	1249	215	1035	K00001	adh	alcohol dehydrogenase [EC:1.1.1.1]	Metabolism of xenobiotics by cytochrome P450;Naphthalene degradation;Metabolic pathways;Degradation of aromatic compounds;Microbial metabolism in diverse environments;Fatty acid degradation;Chloroalkane and chloroalkene degradation;Tyrosine metabolism;Pyruvate metabolism;Drug metabolism - cytochrome P450;Glycolysis / Gluconeogenesis;Biosynthesis of secondary metabolites;Retinol metabolism
MAG26_gene0835	M3_2_3_k97_667203_ORF825	MAG26	d__Bacteria;p__Bacteroidota;c__Bacteroidia;o__Flavobacteriales;f__Flavobacteriaceae;g__Lutimonas;s__Unclassified	3	494	492	K00001	adh	alcohol dehydrogenase [EC:1.1.1.1]	Metabolism of xenobiotics by cytochrome P450;Naphthalene degradation;Metabolic pathways;Degradation of aromatic compounds;Microbial metabolism in diverse environments;Fatty acid degradation;Chloroalkane and chloroalkene degradation;Tyrosine metabolism;Pyruvate metabolism;Drug metabolism - cytochrome P450;Glycolysis / Gluconeogenesis;Biosynthesis of secondary metabolites;Retinol metabolism
MAG26_gene2234	M3_2_3_k97_471729_ORF2213	MAG26	d__Bacteria;p__Bacteroidota;c__Bacteroidia;o__Flavobacteriales;f__Flavobacteriaceae;g__Lutimonas;s__Unclassified	2362	3027	666	K00001	adh	alcohol dehydrogenase [EC:1.1.1.1]	Metabolism of xenobiotics by cytochrome P450;Naphthalene degradation;Metabolic pathways;Degradation of aromatic compounds;Microbial metabolism in diverse environments;Fatty acid degradation;Chloroalkane and chloroalkene degradation;Tyrosine metabolism;Pyruvate metabolism;Drug metabolism - cytochrome P450;Glycolysis / Gluconeogenesis;Biosynthesis of secondary metabolites;Retinol metabolism
MAG262_gene0040	FG_SC_2_k97_1260177_ORF36	MAG262	d__Bacteria;p__Actinomycetota;c__Acidimicrobiia;o__UBA5794;f__ZC4RG35;g__Unclassified;s__Unclassified	11905	10853	1053	K00001	adh	alcohol dehydrogenase [EC:1.1.1.1]	Metabolism of xenobiotics by cytochrome P450;Naphthalene degradation;Metabolic pathways;Degradation of aromatic compounds;Microbial metabolism in diverse environments;Fatty acid degradation;Chloroalkane and chloroalkene degradation;Tyrosine metabolism;Pyruvate metabolism;Drug metabolism - cytochrome P450;Glycolysis / Gluconeogenesis;Biosynthesis of secondary metabolites;Retinol metabolism
MAG262_gene0509	FG_SC_2_k97_301299_ORF502	MAG262	d__Bacteria;p__Actinomycetota;c__Acidimicrobiia;o__UBA5794;f__ZC4RG35;g__Unclassified;s__Unclassified	1	732	732	K00001	adh	alcohol dehydrogenase [EC:1.1.1.1]	Metabolism of xenobiotics by cytochrome P450;Naphthalene degradation;Metabolic pathways;Degradation of aromatic compounds;Microbial metabolism in diverse environments;Fatty acid degradation;Chloroalkane and chloroalkene degradation;Tyrosine metabolism;Pyruvate metabolism;Drug metabolism - cytochrome P450;Glycolysis / Gluconeogenesis;Biosynthesis of secondary metabolites;Retinol metabolism
MAG262_gene1200	FG_SC_2_k97_878460_ORF1186	MAG262	d__Bacteria;p__Actinomycetota;c__Acidimicrobiia;o__UBA5794;f__ZC4RG35;g__Unclassified;s__Unclassified	5335	4445	891	K00001	adh	alcohol dehydrogenase [EC:1.1.1.1]	Metabolism of xenobiotics by cytochrome P450;Naphthalene degradation;Metabolic pathways;Degradation of aromatic compounds;Microbial metabolism in diverse environments;Fatty acid degradation;Chloroalkane and chloroalkene degradation;Tyrosine metabolism;Pyruvate metabolism;Drug metabolism - cytochrome P450;Glycolysis / Gluconeogenesis;Biosynthesis of secondary metabolites;Retinol metabolism
MAG262_gene1234	FG_SC_2_k97_57041_ORF1220	MAG262	d__Bacteria;p__Actinomycetota;c__Acidimicrobiia;o__UBA5794;f__ZC4RG35;g__Unclassified;s__Unclassified	4220	5242	1023	K00001	adh	alcohol dehydrogenase [EC:1.1.1.1]	Metabolism of xenobiotics by cytochrome P450;Naphthalene degradation;Metabolic pathways;Degradation of aromatic compounds;Microbial metabolism in diverse environments;Fatty acid degradation;Chloroalkane and chloroalkene degradation;Tyrosine metabolism;Pyruvate metabolism;Drug metabolism - cytochrome P450;Glycolysis / Gluconeogenesis;Biosynthesis of secondary metabolites;Retinol metabolism
MAG263_gene1593	FG_SC_3_k97_1070631_ORF1580	MAG263	d__Bacteria;p__Chloroflexota;c__Anaerolineae;o__Promineofilales;f__Promineofilaceae;g__Unclassified;s__Unclassified	2781	1741	1041	K00001	adh	alcohol dehydrogenase [EC:1.1.1.1]	Metabolism of xenobiotics by cytochrome P450;Naphthalene degradation;Metabolic pathways;Degradation of aromatic compounds;Microbial metabolism in diverse environments;Fatty acid degradation;Chloroalkane and chloroalkene degradation;Tyrosine metabolism;Pyruvate metabolism;Drug metabolism - cytochrome P450;Glycolysis / Gluconeogenesis;Biosynthesis of secondary metabolites;Retinol metabolism
MAG263_gene1700	FG_SC_3_k97_346729_ORF1686	MAG263	d__Bacteria;p__Chloroflexota;c__Anaerolineae;o__Promineofilales;f__Promineofilaceae;g__Unclassified;s__Unclassified	1341	2369	1029	K00001	adh	alcohol dehydrogenase [EC:1.1.1.1]	Metabolism of xenobiotics by cytochrome P450;Naphthalene degradation;Metabolic pathways;Degradation of aromatic compounds;Microbial metabolism in diverse environments;Fatty acid degradation;Chloroalkane and chloroalkene degradation;Tyrosine metabolism;Pyruvate metabolism;Drug metabolism - cytochrome P450;Glycolysis / Gluconeogenesis;Biosynthesis of secondary metabolites;Retinol metabolism
MAG263_gene2213	FG_SC_3_k97_80059_ORF2195	MAG263	d__Bacteria;p__Chloroflexota;c__Anaerolineae;o__Promineofilales;f__Promineofilaceae;g__Unclassified;s__Unclassified	2587	1565	1023	K00001	adh	alcohol dehydrogenase [EC:1.1.1.1]	Metabolism of xenobiotics by cytochrome P450;Naphthalene degradation;Metabolic pathways;Degradation of aromatic compounds;Microbial metabolism in diverse environments;Fatty acid degradation;Chloroalkane and chloroalkene degradation;Tyrosine metabolism;Pyruvate metabolism;Drug metabolism - cytochrome P450;Glycolysis / Gluconeogenesis;Biosynthesis of secondary metabolites;Retinol metabolism
MAG263_gene2843	FG_SC_3_k97_760434_ORF2821	MAG263	d__Bacteria;p__Chloroflexota;c__Anaerolineae;o__Promineofilales;f__Promineofilaceae;g__Unclassified;s__Unclassified	2703	1870	834	K00001	adh	alcohol dehydrogenase [EC:1.1.1.1]	Metabolism of xenobiotics by cytochrome P450;Naphthalene degradation;Metabolic pathways;Degradation of aromatic compounds;Microbial metabolism in diverse environments;Fatty acid degradation;Chloroalkane and chloroalkene degradation;Tyrosine metabolism;Pyruvate metabolism;Drug metabolism - cytochrome P450;Glycolysis / Gluconeogenesis;Biosynthesis of secondary metabolites;Retinol metabolism
MAG263_gene2880	FG_SC_3_k97_774368_ORF2858	MAG263	d__Bacteria;p__Chloroflexota;c__Anaerolineae;o__Promineofilales;f__Promineofilaceae;g__Unclassified;s__Unclassified	1960	869	1092	K00001	adh	alcohol dehydrogenase [EC:1.1.1.1]	Metabolism of xenobiotics by cytochrome P450;Naphthalene degradation;Metabolic pathways;Degradation of aromatic compounds;Microbial metabolism in diverse environments;Fatty acid degradation;Chloroalkane and chloroalkene degradation;Tyrosine metabolism;Pyruvate metabolism;Drug metabolism - cytochrome P450;Glycolysis / Gluconeogenesis;Biosynthesis of secondary metabolites;Retinol metabolism
MAG263_gene3361	FG_SC_3_k97_58328_ORF3336	MAG263	d__Bacteria;p__Chloroflexota;c__Anaerolineae;o__Promineofilales;f__Promineofilaceae;g__Unclassified;s__Unclassified	1	492	492	K00001	adh	alcohol dehydrogenase [EC:1.1.1.1]	Metabolism of xenobiotics by cytochrome P450;Naphthalene degradation;Metabolic pathways;Degradation of aromatic compounds;Microbial metabolism in diverse environments;Fatty acid degradation;Chloroalkane and chloroalkene degradation;Tyrosine metabolism;Pyruvate metabolism;Drug metabolism - cytochrome P450;Glycolysis / Gluconeogenesis;Biosynthesis of secondary metabolites;Retinol metabolism
MAG263_gene3722	FG_SC_3_k97_242706_ORF3694	MAG263	d__Bacteria;p__Chloroflexota;c__Anaerolineae;o__Promineofilales;f__Promineofilaceae;g__Unclassified;s__Unclassified	1597	2088	492	K00001	adh	alcohol dehydrogenase [EC:1.1.1.1]	Metabolism of xenobiotics by cytochrome P450;Naphthalene degradation;Metabolic pathways;Degradation of aromatic compounds;Microbial metabolism in diverse environments;Fatty acid degradation;Chloroalkane and chloroalkene degradation;Tyrosine metabolism;Pyruvate metabolism;Drug metabolism - cytochrome P450;Glycolysis / Gluconeogenesis;Biosynthesis of secondary metabolites;Retinol metabolism
MAG263_gene3961	FG_SC_3_k97_916625_ORF3933	MAG263	d__Bacteria;p__Chloroflexota;c__Anaerolineae;o__Promineofilales;f__Promineofilaceae;g__Unclassified;s__Unclassified	1084	1923	840	K00001	adh	alcohol dehydrogenase [EC:1.1.1.1]	Metabolism of xenobiotics by cytochrome P450;Naphthalene degradation;Metabolic pathways;Degradation of aromatic compounds;Microbial metabolism in diverse environments;Fatty acid degradation;Chloroalkane and chloroalkene degradation;Tyrosine metabolism;Pyruvate metabolism;Drug metabolism - cytochrome P450;Glycolysis / Gluconeogenesis;Biosynthesis of secondary metabolites;Retinol metabolism
MAG263_gene4558	FG_SC_3_k97_410007_ORF4525	MAG263	d__Bacteria;p__Chloroflexota;c__Anaerolineae;o__Promineofilales;f__Promineofilaceae;g__Unclassified;s__Unclassified	313	2	312	K00001	adh	alcohol dehydrogenase [EC:1.1.1.1]	Metabolism of xenobiotics by cytochrome P450;Naphthalene degradation;Metabolic pathways;Degradation of aromatic compounds;Microbial metabolism in diverse environments;Fatty acid degradation;Chloroalkane and chloroalkene degradation;Tyrosine metabolism;Pyruvate metabolism;Drug metabolism - cytochrome P450;Glycolysis / Gluconeogenesis;Biosynthesis of secondary metabolites;Retinol metabolism
MAG264_gene1386	CPT_SW_1_k97_63067_ORF1383	MAG264	d__Bacteria;p__Desulfobacterota_B;c__Binatia;o__DP-6;f__DP-6;g__Unclassified;s__Unclassified	2494	3597	1104	K00001	adh	alcohol dehydrogenase [EC:1.1.1.1]	Metabolism of xenobiotics by cytochrome P450;Naphthalene degradation;Metabolic pathways;Degradation of aromatic compounds;Microbial metabolism in diverse environments;Fatty acid degradation;Chloroalkane and chloroalkene degradation;Tyrosine metabolism;Pyruvate metabolism;Drug metabolism - cytochrome P450;Glycolysis / Gluconeogenesis;Biosynthesis of secondary metabolites;Retinol metabolism
MAG265_gene4382	M1_2_1_k97_712017_ORF4357	MAG265	d__Bacteria;p__Cyanobacteriota;c__Cyanobacteriia;o__Cyanobacteriales;f__Xenococcaceae;g__Waterburya;s__Unclassified	2092	1139	954	K00001	adh	alcohol dehydrogenase [EC:1.1.1.1]	Metabolism of xenobiotics by cytochrome P450;Naphthalene degradation;Metabolic pathways;Degradation of aromatic compounds;Microbial metabolism in diverse environments;Fatty acid degradation;Chloroalkane and chloroalkene degradation;Tyrosine metabolism;Pyruvate metabolism;Drug metabolism - cytochrome P450;Glycolysis / Gluconeogenesis;Biosynthesis of secondary metabolites;Retinol metabolism
MAG267_gene2881	M2_2_3_k97_1398345_ORF2847	MAG267	d__Bacteria;p__Desulfobacterota;c__Desulfobacteria;o__Desulfobacterales;f__UBA11574;g__UBA11574;s__Unclassified	2836	2348	489	K00001	adh	alcohol dehydrogenase [EC:1.1.1.1]	Metabolism of xenobiotics by cytochrome P450;Naphthalene degradation;Metabolic pathways;Degradation of aromatic compounds;Microbial metabolism in diverse environments;Fatty acid degradation;Chloroalkane and chloroalkene degradation;Tyrosine metabolism;Pyruvate metabolism;Drug metabolism - cytochrome P450;Glycolysis / Gluconeogenesis;Biosynthesis of secondary metabolites;Retinol metabolism
MAG268_gene1415	M3_1_2_k97_917_ORF1407	MAG268	d__Bacteria;p__Pseudomonadota;c__Gammaproteobacteria;o__UBA9214;f__UBA9214;g__UBA9214;s__Unclassified	4540	3347	1194	K00001	adh	alcohol dehydrogenase [EC:1.1.1.1]	Metabolism of xenobiotics by cytochrome P450;Naphthalene degradation;Metabolic pathways;Degradation of aromatic compounds;Microbial metabolism in diverse environments;Fatty acid degradation;Chloroalkane and chloroalkene degradation;Tyrosine metabolism;Pyruvate metabolism;Drug metabolism - cytochrome P450;Glycolysis / Gluconeogenesis;Biosynthesis of secondary metabolites;Retinol metabolism
MAG269_gene1054	M2_2_1_k97_891303_ORF1047	MAG269	d__Bacteria;p__Acidobacteriota;c__Thermoanaerobaculia;o__Thermoanaerobaculales;f__Sulfomarinibacteraceae;g__JANTFG01;s__Unclassified	2694	1681	1014	K00001	adh	alcohol dehydrogenase [EC:1.1.1.1]	Metabolism of xenobiotics by cytochrome P450;Naphthalene degradation;Metabolic pathways;Degradation of aromatic compounds;Microbial metabolism in diverse environments;Fatty acid degradation;Chloroalkane and chloroalkene degradation;Tyrosine metabolism;Pyruvate metabolism;Drug metabolism - cytochrome P450;Glycolysis / Gluconeogenesis;Biosynthesis of secondary metabolites;Retinol metabolism
MAG27_gene1311	CPT_MZ_1_k97_498066_ORF1301	MAG27	d__Bacteria;p__Chloroflexota;c__Anaerolineae;o__Anaerolineales;f__UBA4823;g__PFL25;s__Unclassified	1391	2413	1023	K00001	adh	alcohol dehydrogenase [EC:1.1.1.1]	Metabolism of xenobiotics by cytochrome P450;Naphthalene degradation;Metabolic pathways;Degradation of aromatic compounds;Microbial metabolism in diverse environments;Fatty acid degradation;Chloroalkane and chloroalkene degradation;Tyrosine metabolism;Pyruvate metabolism;Drug metabolism - cytochrome P450;Glycolysis / Gluconeogenesis;Biosynthesis of secondary metabolites;Retinol metabolism
MAG27_gene2386	CPT_MZ_1_k97_161727_ORF2371	MAG27	d__Bacteria;p__Chloroflexota;c__Anaerolineae;o__Anaerolineales;f__UBA4823;g__PFL25;s__Unclassified	1584	580	1005	K00001	adh	alcohol dehydrogenase [EC:1.1.1.1]	Metabolism of xenobiotics by cytochrome P450;Naphthalene degradation;Metabolic pathways;Degradation of aromatic compounds;Microbial metabolism in diverse environments;Fatty acid degradation;Chloroalkane and chloroalkene degradation;Tyrosine metabolism;Pyruvate metabolism;Drug metabolism - cytochrome P450;Glycolysis / Gluconeogenesis;Biosynthesis of secondary metabolites;Retinol metabolism
MAG270_gene2620	M1_2_1_k97_621772_ORF2609	MAG270	d__Bacteria;p__Pseudomonadota;c__Gammaproteobacteria;o__Competibacterales;f__Competibacteraceae;g__Unclassified;s__Unclassified	197	3	195	K00001	adh	alcohol dehydrogenase [EC:1.1.1.1]	Metabolism of xenobiotics by cytochrome P450;Naphthalene degradation;Metabolic pathways;Degradation of aromatic compounds;Microbial metabolism in diverse environments;Fatty acid degradation;Chloroalkane and chloroalkene degradation;Tyrosine metabolism;Pyruvate metabolism;Drug metabolism - cytochrome P450;Glycolysis / Gluconeogenesis;Biosynthesis of secondary metabolites;Retinol metabolism
MAG270_gene2787	M1_2_1_k97_781327_ORF2774	MAG270	d__Bacteria;p__Pseudomonadota;c__Gammaproteobacteria;o__Competibacterales;f__Competibacteraceae;g__Unclassified;s__Unclassified	1633	614	1020	K00001	adh	alcohol dehydrogenase [EC:1.1.1.1]	Metabolism of xenobiotics by cytochrome P450;Naphthalene degradation;Metabolic pathways;Degradation of aromatic compounds;Microbial metabolism in diverse environments;Fatty acid degradation;Chloroalkane and chloroalkene degradation;Tyrosine metabolism;Pyruvate metabolism;Drug metabolism - cytochrome P450;Glycolysis / Gluconeogenesis;Biosynthesis of secondary metabolites;Retinol metabolism
MAG270_gene4079	M1_2_1_k97_106076_ORF4059	MAG270	d__Bacteria;p__Pseudomonadota;c__Gammaproteobacteria;o__Competibacterales;f__Competibacteraceae;g__Unclassified;s__Unclassified	1372	866	507	K00001	adh	alcohol dehydrogenase [EC:1.1.1.1]	Metabolism of xenobiotics by cytochrome P450;Naphthalene degradation;Metabolic pathways;Degradation of aromatic compounds;Microbial metabolism in diverse environments;Fatty acid degradation;Chloroalkane and chloroalkene degradation;Tyrosine metabolism;Pyruvate metabolism;Drug metabolism - cytochrome P450;Glycolysis / Gluconeogenesis;Biosynthesis of secondary metabolites;Retinol metabolism
MAG270_gene4376	M1_2_1_k97_271344_ORF4356	MAG270	d__Bacteria;p__Pseudomonadota;c__Gammaproteobacteria;o__Competibacterales;f__Competibacteraceae;g__Unclassified;s__Unclassified	798	1	798	K00001	adh	alcohol dehydrogenase [EC:1.1.1.1]	Metabolism of xenobiotics by cytochrome P450;Naphthalene degradation;Metabolic pathways;Degradation of aromatic compounds;Microbial metabolism in diverse environments;Fatty acid degradation;Chloroalkane and chloroalkene degradation;Tyrosine metabolism;Pyruvate metabolism;Drug metabolism - cytochrome P450;Glycolysis / Gluconeogenesis;Biosynthesis of secondary metabolites;Retinol metabolism
MAG270_gene4761	M1_2_1_k97_639898_ORF4741	MAG270	d__Bacteria;p__Pseudomonadota;c__Gammaproteobacteria;o__Competibacterales;f__Competibacteraceae;g__Unclassified;s__Unclassified	918	1	918	K00001	adh	alcohol dehydrogenase [EC:1.1.1.1]	Metabolism of xenobiotics by cytochrome P450;Naphthalene degradation;Metabolic pathways;Degradation of aromatic compounds;Microbial metabolism in diverse environments;Fatty acid degradation;Chloroalkane and chloroalkene degradation;Tyrosine metabolism;Pyruvate metabolism;Drug metabolism - cytochrome P450;Glycolysis / Gluconeogenesis;Biosynthesis of secondary metabolites;Retinol metabolism
MAG271_gene1475	DY_3_k97_543851_ORF1459	MAG271	d__Bacteria;p__Pseudomonadota;c__Gammaproteobacteria;o__UBA9214;f__UBA9214;g__UBA9214;s__Unclassified	2	448	447	K00001	adh	alcohol dehydrogenase [EC:1.1.1.1]	Metabolism of xenobiotics by cytochrome P450;Naphthalene degradation;Metabolic pathways;Degradation of aromatic compounds;Microbial metabolism in diverse environments;Fatty acid degradation;Chloroalkane and chloroalkene degradation;Tyrosine metabolism;Pyruvate metabolism;Drug metabolism - cytochrome P450;Glycolysis / Gluconeogenesis;Biosynthesis of secondary metabolites;Retinol metabolism
MAG273_gene2148	M3_2_3_k97_722724_ORF2130	MAG273	d__Bacteria;p__Pseudomonadota;c__Gammaproteobacteria;o__UBA9214;f__UBA9214;g__Unclassified;s__Unclassified	1973	780	1194	K00001	adh	alcohol dehydrogenase [EC:1.1.1.1]	Metabolism of xenobiotics by cytochrome P450;Naphthalene degradation;Metabolic pathways;Degradation of aromatic compounds;Microbial metabolism in diverse environments;Fatty acid degradation;Chloroalkane and chloroalkene degradation;Tyrosine metabolism;Pyruvate metabolism;Drug metabolism - cytochrome P450;Glycolysis / Gluconeogenesis;Biosynthesis of secondary metabolites;Retinol metabolism
MAG274_gene0255	FG_SC_3_k97_364259_ORF253	MAG274	d__Bacteria;p__Actinomycetota;c__Acidimicrobiia;o__UBA5794;f__ZC4RG35;g__Unclassified;s__Unclassified	4370	5422	1053	K00001	adh	alcohol dehydrogenase [EC:1.1.1.1]	Metabolism of xenobiotics by cytochrome P450;Naphthalene degradation;Metabolic pathways;Degradation of aromatic compounds;Microbial metabolism in diverse environments;Fatty acid degradation;Chloroalkane and chloroalkene degradation;Tyrosine metabolism;Pyruvate metabolism;Drug metabolism - cytochrome P450;Glycolysis / Gluconeogenesis;Biosynthesis of secondary metabolites;Retinol metabolism
MAG274_gene0894	FG_SC_3_k97_114609_ORF883	MAG274	d__Bacteria;p__Actinomycetota;c__Acidimicrobiia;o__UBA5794;f__ZC4RG35;g__Unclassified;s__Unclassified	5920	6942	1023	K00001	adh	alcohol dehydrogenase [EC:1.1.1.1]	Metabolism of xenobiotics by cytochrome P450;Naphthalene degradation;Metabolic pathways;Degradation of aromatic compounds;Microbial metabolism in diverse environments;Fatty acid degradation;Chloroalkane and chloroalkene degradation;Tyrosine metabolism;Pyruvate metabolism;Drug metabolism - cytochrome P450;Glycolysis / Gluconeogenesis;Biosynthesis of secondary metabolites;Retinol metabolism
MAG274_gene2378	FG_SC_3_k97_358693_ORF2349	MAG274	d__Bacteria;p__Actinomycetota;c__Acidimicrobiia;o__UBA5794;f__ZC4RG35;g__Unclassified;s__Unclassified	2	691	690	K00001	adh	alcohol dehydrogenase [EC:1.1.1.1]	Metabolism of xenobiotics by cytochrome P450;Naphthalene degradation;Metabolic pathways;Degradation of aromatic compounds;Microbial metabolism in diverse environments;Fatty acid degradation;Chloroalkane and chloroalkene degradation;Tyrosine metabolism;Pyruvate metabolism;Drug metabolism - cytochrome P450;Glycolysis / Gluconeogenesis;Biosynthesis of secondary metabolites;Retinol metabolism
MAG276_gene2266	M3_1_3_k97_788285_ORF2247	MAG276	d__Bacteria;p__Pseudomonadota;c__Gammaproteobacteria;o__Steroidobacterales;f__Steroidobacteraceae;g__Unclassified;s__Unclassified	1301	129	1173	K00001	adh	alcohol dehydrogenase [EC:1.1.1.1]	Metabolism of xenobiotics by cytochrome P450;Naphthalene degradation;Metabolic pathways;Degradation of aromatic compounds;Microbial metabolism in diverse environments;Fatty acid degradation;Chloroalkane and chloroalkene degradation;Tyrosine metabolism;Pyruvate metabolism;Drug metabolism - cytochrome P450;Glycolysis / Gluconeogenesis;Biosynthesis of secondary metabolites;Retinol metabolism
MAG277_gene0518	M1_1_1_k97_445860_ORF514	MAG277	d__Bacteria;p__Desulfobacterota;c__Desulfobulbia;o__Desulfobulbales;f__Desulfocapsaceae;g__JABDQA01;s__Unclassified	2276	3457	1182	K00001	adh	alcohol dehydrogenase [EC:1.1.1.1]	Metabolism of xenobiotics by cytochrome P450;Naphthalene degradation;Metabolic pathways;Degradation of aromatic compounds;Microbial metabolism in diverse environments;Fatty acid degradation;Chloroalkane and chloroalkene degradation;Tyrosine metabolism;Pyruvate metabolism;Drug metabolism - cytochrome P450;Glycolysis / Gluconeogenesis;Biosynthesis of secondary metabolites;Retinol metabolism
MAG277_gene3248	M1_1_1_k97_973764_ORF3230	MAG277	d__Bacteria;p__Desulfobacterota;c__Desulfobulbia;o__Desulfobulbales;f__Desulfocapsaceae;g__JABDQA01;s__Unclassified	1646	633	1014	K00001	adh	alcohol dehydrogenase [EC:1.1.1.1]	Metabolism of xenobiotics by cytochrome P450;Naphthalene degradation;Metabolic pathways;Degradation of aromatic compounds;Microbial metabolism in diverse environments;Fatty acid degradation;Chloroalkane and chloroalkene degradation;Tyrosine metabolism;Pyruvate metabolism;Drug metabolism - cytochrome P450;Glycolysis / Gluconeogenesis;Biosynthesis of secondary metabolites;Retinol metabolism
MAG278_gene2004	CPT_MZ_3_k97_924586_ORF1989	MAG278	d__Bacteria;p__Chloroflexota;c__Anaerolineae;o__Anaerolineales;f__UBA4823;g__PFL25;s__Unclassified	809	1813	1005	K00001	adh	alcohol dehydrogenase [EC:1.1.1.1]	Metabolism of xenobiotics by cytochrome P450;Naphthalene degradation;Metabolic pathways;Degradation of aromatic compounds;Microbial metabolism in diverse environments;Fatty acid degradation;Chloroalkane and chloroalkene degradation;Tyrosine metabolism;Pyruvate metabolism;Drug metabolism - cytochrome P450;Glycolysis / Gluconeogenesis;Biosynthesis of secondary metabolites;Retinol metabolism
MAG278_gene2005	CPT_MZ_3_k97_924586_ORF1990	MAG278	d__Bacteria;p__Chloroflexota;c__Anaerolineae;o__Anaerolineales;f__UBA4823;g__PFL25;s__Unclassified	1860	2522	663	K00001	adh	alcohol dehydrogenase [EC:1.1.1.1]	Metabolism of xenobiotics by cytochrome P450;Naphthalene degradation;Metabolic pathways;Degradation of aromatic compounds;Microbial metabolism in diverse environments;Fatty acid degradation;Chloroalkane and chloroalkene degradation;Tyrosine metabolism;Pyruvate metabolism;Drug metabolism - cytochrome P450;Glycolysis / Gluconeogenesis;Biosynthesis of secondary metabolites;Retinol metabolism
MAG278_gene2504	CPT_MZ_3_k97_296343_ORF2485	MAG278	d__Bacteria;p__Chloroflexota;c__Anaerolineae;o__Anaerolineales;f__UBA4823;g__PFL25;s__Unclassified	2	514	513	K00001	adh	alcohol dehydrogenase [EC:1.1.1.1]	Metabolism of xenobiotics by cytochrome P450;Naphthalene degradation;Metabolic pathways;Degradation of aromatic compounds;Microbial metabolism in diverse environments;Fatty acid degradation;Chloroalkane and chloroalkene degradation;Tyrosine metabolism;Pyruvate metabolism;Drug metabolism - cytochrome P450;Glycolysis / Gluconeogenesis;Biosynthesis of secondary metabolites;Retinol metabolism
MAG278_gene2864	CPT_MZ_3_k97_896827_ORF2844	MAG278	d__Bacteria;p__Chloroflexota;c__Anaerolineae;o__Anaerolineales;f__UBA4823;g__PFL25;s__Unclassified	1542	622	921	K00001	adh	alcohol dehydrogenase [EC:1.1.1.1]	Metabolism of xenobiotics by cytochrome P450;Naphthalene degradation;Metabolic pathways;Degradation of aromatic compounds;Microbial metabolism in diverse environments;Fatty acid degradation;Chloroalkane and chloroalkene degradation;Tyrosine metabolism;Pyruvate metabolism;Drug metabolism - cytochrome P450;Glycolysis / Gluconeogenesis;Biosynthesis of secondary metabolites;Retinol metabolism
MAG279_gene1540	FG_WR_2_k97_1163171_ORF1530	MAG279	d__Bacteria;p__Pseudomonadota;c__Gammaproteobacteria;o__Burkholderiales;f__Nitrosomonadaceae;g__Nitrosomonas;s__Nitrosomonas sp024235735	1405	206	1200	K00001	adh	alcohol dehydrogenase [EC:1.1.1.1]	Metabolism of xenobiotics by cytochrome P450;Naphthalene degradation;Metabolic pathways;Degradation of aromatic compounds;Microbial metabolism in diverse environments;Fatty acid degradation;Chloroalkane and chloroalkene degradation;Tyrosine metabolism;Pyruvate metabolism;Drug metabolism - cytochrome P450;Glycolysis / Gluconeogenesis;Biosynthesis of secondary metabolites;Retinol metabolism
MAG28_gene0774	M2_1_2_k97_704777_ORF768	MAG28	d__Bacteria;p__Pseudomonadota;c__Gammaproteobacteria;o__Chromatiales;f__Sedimenticolaceae;g__Sva-25;s__Unclassified	655	2	654	K00001	adh	alcohol dehydrogenase [EC:1.1.1.1]	Metabolism of xenobiotics by cytochrome P450;Naphthalene degradation;Metabolic pathways;Degradation of aromatic compounds;Microbial metabolism in diverse environments;Fatty acid degradation;Chloroalkane and chloroalkene degradation;Tyrosine metabolism;Pyruvate metabolism;Drug metabolism - cytochrome P450;Glycolysis / Gluconeogenesis;Biosynthesis of secondary metabolites;Retinol metabolism
MAG280_gene0512	M1_1_2_k97_756900_ORF509	MAG280	d__Bacteria;p__Desulfobacterota;c__Desulfobulbia;o__Desulfobulbales;f__Desulfocapsaceae;g__JABDQA01;s__Unclassified	3397	2357	1041	K00001	adh	alcohol dehydrogenase [EC:1.1.1.1]	Metabolism of xenobiotics by cytochrome P450;Naphthalene degradation;Metabolic pathways;Degradation of aromatic compounds;Microbial metabolism in diverse environments;Fatty acid degradation;Chloroalkane and chloroalkene degradation;Tyrosine metabolism;Pyruvate metabolism;Drug metabolism - cytochrome P450;Glycolysis / Gluconeogenesis;Biosynthesis of secondary metabolites;Retinol metabolism
MAG281_gene1936	M2_2_3_k97_1139012_ORF1914	MAG281	d__Bacteria;p__Chloroflexota;c__Anaerolineae;o__Anaerolineales;f__UBA11858;g__B10-G9;s__Unclassified	1065	2057	993	K00001	adh	alcohol dehydrogenase [EC:1.1.1.1]	Metabolism of xenobiotics by cytochrome P450;Naphthalene degradation;Metabolic pathways;Degradation of aromatic compounds;Microbial metabolism in diverse environments;Fatty acid degradation;Chloroalkane and chloroalkene degradation;Tyrosine metabolism;Pyruvate metabolism;Drug metabolism - cytochrome P450;Glycolysis / Gluconeogenesis;Biosynthesis of secondary metabolites;Retinol metabolism
MAG281_gene2240	M2_2_3_k97_1033838_ORF2214	MAG281	d__Bacteria;p__Chloroflexota;c__Anaerolineae;o__Anaerolineales;f__UBA11858;g__B10-G9;s__Unclassified	1408	221	1188	K00001	adh	alcohol dehydrogenase [EC:1.1.1.1]	Metabolism of xenobiotics by cytochrome P450;Naphthalene degradation;Metabolic pathways;Degradation of aromatic compounds;Microbial metabolism in diverse environments;Fatty acid degradation;Chloroalkane and chloroalkene degradation;Tyrosine metabolism;Pyruvate metabolism;Drug metabolism - cytochrome P450;Glycolysis / Gluconeogenesis;Biosynthesis of secondary metabolites;Retinol metabolism
MAG282_gene1394	M2_1_3_k97_673594_ORF1374	MAG282	d__Bacteria;p__Actinomycetota;c__Actinomycetia;o__Actinomycetales;f__Dermatophilaceae;g__Phycicoccus;s__Unclassified	4756	3722	1035	K00001	adh	alcohol dehydrogenase [EC:1.1.1.1]	Metabolism of xenobiotics by cytochrome P450;Naphthalene degradation;Metabolic pathways;Degradation of aromatic compounds;Microbial metabolism in diverse environments;Fatty acid degradation;Chloroalkane and chloroalkene degradation;Tyrosine metabolism;Pyruvate metabolism;Drug metabolism - cytochrome P450;Glycolysis / Gluconeogenesis;Biosynthesis of secondary metabolites;Retinol metabolism
MAG282_gene1976	M2_1_3_k97_420518_ORF1952	MAG282	d__Bacteria;p__Actinomycetota;c__Actinomycetia;o__Actinomycetales;f__Dermatophilaceae;g__Phycicoccus;s__Unclassified	1074	106	969	K00001	adh	alcohol dehydrogenase [EC:1.1.1.1]	Metabolism of xenobiotics by cytochrome P450;Naphthalene degradation;Metabolic pathways;Degradation of aromatic compounds;Microbial metabolism in diverse environments;Fatty acid degradation;Chloroalkane and chloroalkene degradation;Tyrosine metabolism;Pyruvate metabolism;Drug metabolism - cytochrome P450;Glycolysis / Gluconeogenesis;Biosynthesis of secondary metabolites;Retinol metabolism
MAG282_gene2259	M2_1_3_k97_1576158_ORF2232	MAG282	d__Bacteria;p__Actinomycetota;c__Actinomycetia;o__Actinomycetales;f__Dermatophilaceae;g__Phycicoccus;s__Unclassified	1837	2754	918	K00001	adh	alcohol dehydrogenase [EC:1.1.1.1]	Metabolism of xenobiotics by cytochrome P450;Naphthalene degradation;Metabolic pathways;Degradation of aromatic compounds;Microbial metabolism in diverse environments;Fatty acid degradation;Chloroalkane and chloroalkene degradation;Tyrosine metabolism;Pyruvate metabolism;Drug metabolism - cytochrome P450;Glycolysis / Gluconeogenesis;Biosynthesis of secondary metabolites;Retinol metabolism
MAG282_gene2589	M2_1_3_k97_863460_ORF2561	MAG282	d__Bacteria;p__Actinomycetota;c__Actinomycetia;o__Actinomycetales;f__Dermatophilaceae;g__Phycicoccus;s__Unclassified	1135	158	978	K00001	adh	alcohol dehydrogenase [EC:1.1.1.1]	Metabolism of xenobiotics by cytochrome P450;Naphthalene degradation;Metabolic pathways;Degradation of aromatic compounds;Microbial metabolism in diverse environments;Fatty acid degradation;Chloroalkane and chloroalkene degradation;Tyrosine metabolism;Pyruvate metabolism;Drug metabolism - cytochrome P450;Glycolysis / Gluconeogenesis;Biosynthesis of secondary metabolites;Retinol metabolism
MAG282_gene2878	M2_1_3_k97_1381713_ORF2848	MAG282	d__Bacteria;p__Actinomycetota;c__Actinomycetia;o__Actinomycetales;f__Dermatophilaceae;g__Phycicoccus;s__Unclassified	534	1520	987	K00001	adh	alcohol dehydrogenase [EC:1.1.1.1]	Metabolism of xenobiotics by cytochrome P450;Naphthalene degradation;Metabolic pathways;Degradation of aromatic compounds;Microbial metabolism in diverse environments;Fatty acid degradation;Chloroalkane and chloroalkene degradation;Tyrosine metabolism;Pyruvate metabolism;Drug metabolism - cytochrome P450;Glycolysis / Gluconeogenesis;Biosynthesis of secondary metabolites;Retinol metabolism
MAG283_gene0678	CPT_SW_1_k97_762563_ORF673	MAG283	d__Bacteria;p__Actinomycetota;c__Acidimicrobiia;o__UBA5794;f__ZC4RG35;g__SZUA-217;s__Unclassified	4739	3723	1017	K00001	adh	alcohol dehydrogenase [EC:1.1.1.1]	Metabolism of xenobiotics by cytochrome P450;Naphthalene degradation;Metabolic pathways;Degradation of aromatic compounds;Microbial metabolism in diverse environments;Fatty acid degradation;Chloroalkane and chloroalkene degradation;Tyrosine metabolism;Pyruvate metabolism;Drug metabolism - cytochrome P450;Glycolysis / Gluconeogenesis;Biosynthesis of secondary metabolites;Retinol metabolism
MAG283_gene0938	CPT_SW_1_k97_529985_ORF930	MAG283	d__Bacteria;p__Actinomycetota;c__Acidimicrobiia;o__UBA5794;f__ZC4RG35;g__SZUA-217;s__Unclassified	3206	2130	1077	K00001	adh	alcohol dehydrogenase [EC:1.1.1.1]	Metabolism of xenobiotics by cytochrome P450;Naphthalene degradation;Metabolic pathways;Degradation of aromatic compounds;Microbial metabolism in diverse environments;Fatty acid degradation;Chloroalkane and chloroalkene degradation;Tyrosine metabolism;Pyruvate metabolism;Drug metabolism - cytochrome P450;Glycolysis / Gluconeogenesis;Biosynthesis of secondary metabolites;Retinol metabolism
MAG29_gene1326	M2_2_2_k97_1751643_ORF1311	MAG29	d__Bacteria;p__Desulfobacterota;c__Desulfobulbia;o__Desulfobulbales;f__Desulfocapsaceae;g__JABDQA01;s__Unclassified	4127	3078	1050	K00001	adh	alcohol dehydrogenase [EC:1.1.1.1]	Metabolism of xenobiotics by cytochrome P450;Naphthalene degradation;Metabolic pathways;Degradation of aromatic compounds;Microbial metabolism in diverse environments;Fatty acid degradation;Chloroalkane and chloroalkene degradation;Tyrosine metabolism;Pyruvate metabolism;Drug metabolism - cytochrome P450;Glycolysis / Gluconeogenesis;Biosynthesis of secondary metabolites;Retinol metabolism
MAG3_gene0890	FG_SC_3_k97_514864_ORF886	MAG3	d__Bacteria;p__Chloroflexota;c__Anaerolineae;o__Promineofilales;f__Promineofilaceae;g__JAKEFB01;s__Unclassified	1611	658	954	K00001	adh	alcohol dehydrogenase [EC:1.1.1.1]	Metabolism of xenobiotics by cytochrome P450;Naphthalene degradation;Metabolic pathways;Degradation of aromatic compounds;Microbial metabolism in diverse environments;Fatty acid degradation;Chloroalkane and chloroalkene degradation;Tyrosine metabolism;Pyruvate metabolism;Drug metabolism - cytochrome P450;Glycolysis / Gluconeogenesis;Biosynthesis of secondary metabolites;Retinol metabolism
MAG30_gene2081	CPT_LW_2_k97_900059_ORF2070	MAG30	d__Bacteria;p__Chloroflexota;c__Anaerolineae;o__Anaerolineales;f__UBA4823;g__DSOS01;s__Unclassified	1089	139	951	K00001	adh	alcohol dehydrogenase [EC:1.1.1.1]	Metabolism of xenobiotics by cytochrome P450;Naphthalene degradation;Metabolic pathways;Degradation of aromatic compounds;Microbial metabolism in diverse environments;Fatty acid degradation;Chloroalkane and chloroalkene degradation;Tyrosine metabolism;Pyruvate metabolism;Drug metabolism - cytochrome P450;Glycolysis / Gluconeogenesis;Biosynthesis of secondary metabolites;Retinol metabolism
MAG30_gene3277	CPT_LW_2_k97_677006_ORF3260	MAG30	d__Bacteria;p__Chloroflexota;c__Anaerolineae;o__Anaerolineales;f__UBA4823;g__DSOS01;s__Unclassified	430	2	429	K00001	adh	alcohol dehydrogenase [EC:1.1.1.1]	Metabolism of xenobiotics by cytochrome P450;Naphthalene degradation;Metabolic pathways;Degradation of aromatic compounds;Microbial metabolism in diverse environments;Fatty acid degradation;Chloroalkane and chloroalkene degradation;Tyrosine metabolism;Pyruvate metabolism;Drug metabolism - cytochrome P450;Glycolysis / Gluconeogenesis;Biosynthesis of secondary metabolites;Retinol metabolism
MAG31_gene1285	FG_WR_1_k97_460563_ORF1279	MAG31	d__Bacteria;p__Bacteroidota;c__Bacteroidia;o__Chitinophagales;f__Saprospiraceae;g__Unclassified;s__Unclassified	3956	3525	432	K00001	adh	alcohol dehydrogenase [EC:1.1.1.1]	Metabolism of xenobiotics by cytochrome P450;Naphthalene degradation;Metabolic pathways;Degradation of aromatic compounds;Microbial metabolism in diverse environments;Fatty acid degradation;Chloroalkane and chloroalkene degradation;Tyrosine metabolism;Pyruvate metabolism;Drug metabolism - cytochrome P450;Glycolysis / Gluconeogenesis;Biosynthesis of secondary metabolites;Retinol metabolism
MAG32_gene0206	M2_2_3_k97_401475_ORF206	MAG32	d__Bacteria;p__Pseudomonadota;c__Gammaproteobacteria;o__Chromatiales;f__Chromatiaceae;g__Thiohalocapsa;s__Unclassified	487	1569	1083	K00001	adh	alcohol dehydrogenase [EC:1.1.1.1]	Metabolism of xenobiotics by cytochrome P450;Naphthalene degradation;Metabolic pathways;Degradation of aromatic compounds;Microbial metabolism in diverse environments;Fatty acid degradation;Chloroalkane and chloroalkene degradation;Tyrosine metabolism;Pyruvate metabolism;Drug metabolism - cytochrome P450;Glycolysis / Gluconeogenesis;Biosynthesis of secondary metabolites;Retinol metabolism
MAG33_gene0470	M2_2_2_k97_570107_ORF465	MAG33	d__Bacteria;p__Actinomycetota;c__Actinomycetia;o__Jiangellales;f__Unclassified;g__Unclassified;s__Unclassified	954	1	954	K00001	adh	alcohol dehydrogenase [EC:1.1.1.1]	Metabolism of xenobiotics by cytochrome P450;Naphthalene degradation;Metabolic pathways;Degradation of aromatic compounds;Microbial metabolism in diverse environments;Fatty acid degradation;Chloroalkane and chloroalkene degradation;Tyrosine metabolism;Pyruvate metabolism;Drug metabolism - cytochrome P450;Glycolysis / Gluconeogenesis;Biosynthesis of secondary metabolites;Retinol metabolism
MAG33_gene2316	M2_2_2_k97_1721529_ORF2290	MAG33	d__Bacteria;p__Actinomycetota;c__Actinomycetia;o__Jiangellales;f__Unclassified;g__Unclassified;s__Unclassified	3	347	345	K00001	adh	alcohol dehydrogenase [EC:1.1.1.1]	Metabolism of xenobiotics by cytochrome P450;Naphthalene degradation;Metabolic pathways;Degradation of aromatic compounds;Microbial metabolism in diverse environments;Fatty acid degradation;Chloroalkane and chloroalkene degradation;Tyrosine metabolism;Pyruvate metabolism;Drug metabolism - cytochrome P450;Glycolysis / Gluconeogenesis;Biosynthesis of secondary metabolites;Retinol metabolism
MAG33_gene2881	M2_2_2_k97_951320_ORF2847	MAG33	d__Bacteria;p__Actinomycetota;c__Actinomycetia;o__Jiangellales;f__Unclassified;g__Unclassified;s__Unclassified	307	1086	780	K00001	adh	alcohol dehydrogenase [EC:1.1.1.1]	Metabolism of xenobiotics by cytochrome P450;Naphthalene degradation;Metabolic pathways;Degradation of aromatic compounds;Microbial metabolism in diverse environments;Fatty acid degradation;Chloroalkane and chloroalkene degradation;Tyrosine metabolism;Pyruvate metabolism;Drug metabolism - cytochrome P450;Glycolysis / Gluconeogenesis;Biosynthesis of secondary metabolites;Retinol metabolism
MAG34_gene0022	M3_2_3_k97_990188_ORF22	MAG34	d__Bacteria;p__Actinomycetota;c__Acidimicrobiia;o__Acidimicrobiales;f__Ilumatobacteraceae;g__Ilumatobacter;s__Unclassified	3285	2095	1191	K00001	adh	alcohol dehydrogenase [EC:1.1.1.1]	Metabolism of xenobiotics by cytochrome P450;Naphthalene degradation;Metabolic pathways;Degradation of aromatic compounds;Microbial metabolism in diverse environments;Fatty acid degradation;Chloroalkane and chloroalkene degradation;Tyrosine metabolism;Pyruvate metabolism;Drug metabolism - cytochrome P450;Glycolysis / Gluconeogenesis;Biosynthesis of secondary metabolites;Retinol metabolism
MAG34_gene0744	M3_2_3_k97_1125644_ORF738	MAG34	d__Bacteria;p__Actinomycetota;c__Acidimicrobiia;o__Acidimicrobiales;f__Ilumatobacteraceae;g__Ilumatobacter;s__Unclassified	5916	4819	1098	K00001	adh	alcohol dehydrogenase [EC:1.1.1.1]	Metabolism of xenobiotics by cytochrome P450;Naphthalene degradation;Metabolic pathways;Degradation of aromatic compounds;Microbial metabolism in diverse environments;Fatty acid degradation;Chloroalkane and chloroalkene degradation;Tyrosine metabolism;Pyruvate metabolism;Drug metabolism - cytochrome P450;Glycolysis / Gluconeogenesis;Biosynthesis of secondary metabolites;Retinol metabolism
MAG34_gene1846	M3_2_3_k97_1233236_ORF1838	MAG34	d__Bacteria;p__Actinomycetota;c__Acidimicrobiia;o__Acidimicrobiales;f__Ilumatobacteraceae;g__Ilumatobacter;s__Unclassified	109	1095	987	K00001	adh	alcohol dehydrogenase [EC:1.1.1.1]	Metabolism of xenobiotics by cytochrome P450;Naphthalene degradation;Metabolic pathways;Degradation of aromatic compounds;Microbial metabolism in diverse environments;Fatty acid degradation;Chloroalkane and chloroalkene degradation;Tyrosine metabolism;Pyruvate metabolism;Drug metabolism - cytochrome P450;Glycolysis / Gluconeogenesis;Biosynthesis of secondary metabolites;Retinol metabolism
MAG34_gene3241	M3_2_3_k97_1213556_ORF3226	MAG34	d__Bacteria;p__Actinomycetota;c__Acidimicrobiia;o__Acidimicrobiales;f__Ilumatobacteraceae;g__Ilumatobacter;s__Unclassified	1797	700	1098	K00001	adh	alcohol dehydrogenase [EC:1.1.1.1]	Metabolism of xenobiotics by cytochrome P450;Naphthalene degradation;Metabolic pathways;Degradation of aromatic compounds;Microbial metabolism in diverse environments;Fatty acid degradation;Chloroalkane and chloroalkene degradation;Tyrosine metabolism;Pyruvate metabolism;Drug metabolism - cytochrome P450;Glycolysis / Gluconeogenesis;Biosynthesis of secondary metabolites;Retinol metabolism
MAG34_gene3760	M3_2_3_k97_1499005_ORF3742	MAG34	d__Bacteria;p__Actinomycetota;c__Acidimicrobiia;o__Acidimicrobiales;f__Ilumatobacteraceae;g__Ilumatobacter;s__Unclassified	218	1282	1065	K00001	adh	alcohol dehydrogenase [EC:1.1.1.1]	Metabolism of xenobiotics by cytochrome P450;Naphthalene degradation;Metabolic pathways;Degradation of aromatic compounds;Microbial metabolism in diverse environments;Fatty acid degradation;Chloroalkane and chloroalkene degradation;Tyrosine metabolism;Pyruvate metabolism;Drug metabolism - cytochrome P450;Glycolysis / Gluconeogenesis;Biosynthesis of secondary metabolites;Retinol metabolism
MAG37_gene0539	M2_2_2_k97_1556253_ORF533	MAG37	d__Bacteria;p__Bacteroidota;c__Bacteroidia;o__Flavobacteriales;f__Flavobacteriaceae;g__Robiginitalea;s__Unclassified	3190	4230	1041	K00001	adh	alcohol dehydrogenase [EC:1.1.1.1]	Metabolism of xenobiotics by cytochrome P450;Naphthalene degradation;Metabolic pathways;Degradation of aromatic compounds;Microbial metabolism in diverse environments;Fatty acid degradation;Chloroalkane and chloroalkene degradation;Tyrosine metabolism;Pyruvate metabolism;Drug metabolism - cytochrome P450;Glycolysis / Gluconeogenesis;Biosynthesis of secondary metabolites;Retinol metabolism
MAG38_gene1011	M3_1_1_k97_1020861_ORF1007	MAG38	d__Bacteria;p__Bacteroidota;c__Bacteroidia;o__Flavobacteriales;f__Flavobacteriaceae;g__Lutimonas;s__Unclassified	1994	3034	1041	K00001	adh	alcohol dehydrogenase [EC:1.1.1.1]	Metabolism of xenobiotics by cytochrome P450;Naphthalene degradation;Metabolic pathways;Degradation of aromatic compounds;Microbial metabolism in diverse environments;Fatty acid degradation;Chloroalkane and chloroalkene degradation;Tyrosine metabolism;Pyruvate metabolism;Drug metabolism - cytochrome P450;Glycolysis / Gluconeogenesis;Biosynthesis of secondary metabolites;Retinol metabolism
MAG39_gene1472	CPT_LW_1_k97_759301_ORF1458	MAG39	d__Archaea;p__Thermoproteota;c__Nitrososphaeria;o__Nitrososphaerales;f__Nitrososphaeraceae;g__TH5896;s__Unclassified	3853	2759	1095	K00001	adh	alcohol dehydrogenase [EC:1.1.1.1]	Metabolism of xenobiotics by cytochrome P450;Naphthalene degradation;Metabolic pathways;Degradation of aromatic compounds;Microbial metabolism in diverse environments;Fatty acid degradation;Chloroalkane and chloroalkene degradation;Tyrosine metabolism;Pyruvate metabolism;Drug metabolism - cytochrome P450;Glycolysis / Gluconeogenesis;Biosynthesis of secondary metabolites;Retinol metabolism
MAG41_gene2662	M3_2_1_k97_1108884_ORF2647	MAG41	d__Bacteria;p__Pseudomonadota;c__Gammaproteobacteria;o__UBA9214;f__UBA9214;g__Unclassified;s__Unclassified	622	1308	687	K00001	adh	alcohol dehydrogenase [EC:1.1.1.1]	Metabolism of xenobiotics by cytochrome P450;Naphthalene degradation;Metabolic pathways;Degradation of aromatic compounds;Microbial metabolism in diverse environments;Fatty acid degradation;Chloroalkane and chloroalkene degradation;Tyrosine metabolism;Pyruvate metabolism;Drug metabolism - cytochrome P450;Glycolysis / Gluconeogenesis;Biosynthesis of secondary metabolites;Retinol metabolism
MAG42_gene2117	DY_3_k97_359088_ORF2101	MAG42	d__Bacteria;p__Pseudomonadota;c__Gammaproteobacteria;o__Burkholderiales;f__Burkholderiaceae_A;g__JADJWR01;s__JADJWR01 sp020355165	3656	4669	1014	K00001	adh	alcohol dehydrogenase [EC:1.1.1.1]	Metabolism of xenobiotics by cytochrome P450;Naphthalene degradation;Metabolic pathways;Degradation of aromatic compounds;Microbial metabolism in diverse environments;Fatty acid degradation;Chloroalkane and chloroalkene degradation;Tyrosine metabolism;Pyruvate metabolism;Drug metabolism - cytochrome P450;Glycolysis / Gluconeogenesis;Biosynthesis of secondary metabolites;Retinol metabolism
MAG42_gene2199	DY_3_k97_578183_ORF2182	MAG42	d__Bacteria;p__Pseudomonadota;c__Gammaproteobacteria;o__Burkholderiales;f__Burkholderiaceae_A;g__JADJWR01;s__JADJWR01 sp020355165	4587	3640	948	K00001	adh	alcohol dehydrogenase [EC:1.1.1.1]	Metabolism of xenobiotics by cytochrome P450;Naphthalene degradation;Metabolic pathways;Degradation of aromatic compounds;Microbial metabolism in diverse environments;Fatty acid degradation;Chloroalkane and chloroalkene degradation;Tyrosine metabolism;Pyruvate metabolism;Drug metabolism - cytochrome P450;Glycolysis / Gluconeogenesis;Biosynthesis of secondary metabolites;Retinol metabolism
MAG45_gene1234	M2_1_1_k97_892225_ORF1221	MAG45	d__Bacteria;p__Bacteroidota;c__Bacteroidia;o__Flavobacteriales;f__Flavobacteriaceae;g__Robiginitalea;s__Unclassified	1653	706	948	K00001	adh	alcohol dehydrogenase [EC:1.1.1.1]	Metabolism of xenobiotics by cytochrome P450;Naphthalene degradation;Metabolic pathways;Degradation of aromatic compounds;Microbial metabolism in diverse environments;Fatty acid degradation;Chloroalkane and chloroalkene degradation;Tyrosine metabolism;Pyruvate metabolism;Drug metabolism - cytochrome P450;Glycolysis / Gluconeogenesis;Biosynthesis of secondary metabolites;Retinol metabolism
MAG46_gene2034	M3_1_3_k97_436895_ORF2019	MAG46	d__Bacteria;p__Pseudomonadota;c__Gammaproteobacteria;o__Pseudomonadales;f__Halieaceae;g__Halioglobus;s__Unclassified	2052	1048	1005	K00001	adh	alcohol dehydrogenase [EC:1.1.1.1]	Metabolism of xenobiotics by cytochrome P450;Naphthalene degradation;Metabolic pathways;Degradation of aromatic compounds;Microbial metabolism in diverse environments;Fatty acid degradation;Chloroalkane and chloroalkene degradation;Tyrosine metabolism;Pyruvate metabolism;Drug metabolism - cytochrome P450;Glycolysis / Gluconeogenesis;Biosynthesis of secondary metabolites;Retinol metabolism
MAG46_gene2222	M3_1_3_k97_609189_ORF2206	MAG46	d__Bacteria;p__Pseudomonadota;c__Gammaproteobacteria;o__Pseudomonadales;f__Halieaceae;g__Halioglobus;s__Unclassified	791	3	789	K00001	adh	alcohol dehydrogenase [EC:1.1.1.1]	Metabolism of xenobiotics by cytochrome P450;Naphthalene degradation;Metabolic pathways;Degradation of aromatic compounds;Microbial metabolism in diverse environments;Fatty acid degradation;Chloroalkane and chloroalkene degradation;Tyrosine metabolism;Pyruvate metabolism;Drug metabolism - cytochrome P450;Glycolysis / Gluconeogenesis;Biosynthesis of secondary metabolites;Retinol metabolism
MAG47_gene1550	M3_2_2_k97_609166_ORF1534	MAG47	d__Bacteria;p__Pseudomonadota;c__Gammaproteobacteria;o__Steroidobacterales;f__Steroidobacteraceae;g__Unclassified;s__Unclassified	1197	94	1104	K00001	adh	alcohol dehydrogenase [EC:1.1.1.1]	Metabolism of xenobiotics by cytochrome P450;Naphthalene degradation;Metabolic pathways;Degradation of aromatic compounds;Microbial metabolism in diverse environments;Fatty acid degradation;Chloroalkane and chloroalkene degradation;Tyrosine metabolism;Pyruvate metabolism;Drug metabolism - cytochrome P450;Glycolysis / Gluconeogenesis;Biosynthesis of secondary metabolites;Retinol metabolism
MAG48_gene1114	M2_2_1_k97_975213_ORF1104	MAG48	d__Bacteria;p__Bacteroidota;c__Bacteroidia;o__Flavobacteriales;f__Flavobacteriaceae;g__Robiginitalea;s__Unclassified	2872	3414	543	K00001	adh	alcohol dehydrogenase [EC:1.1.1.1]	Metabolism of xenobiotics by cytochrome P450;Naphthalene degradation;Metabolic pathways;Degradation of aromatic compounds;Microbial metabolism in diverse environments;Fatty acid degradation;Chloroalkane and chloroalkene degradation;Tyrosine metabolism;Pyruvate metabolism;Drug metabolism - cytochrome P450;Glycolysis / Gluconeogenesis;Biosynthesis of secondary metabolites;Retinol metabolism
MAG49_gene1397	M2_2_1_k97_780102_ORF1382	MAG49	d__Bacteria;p__Pseudomonadota;c__Gammaproteobacteria;o__Chromatiales;f__Sedimenticolaceae;g__Unclassified;s__Unclassified	2	580	579	K00001	adh	alcohol dehydrogenase [EC:1.1.1.1]	Metabolism of xenobiotics by cytochrome P450;Naphthalene degradation;Metabolic pathways;Degradation of aromatic compounds;Microbial metabolism in diverse environments;Fatty acid degradation;Chloroalkane and chloroalkene degradation;Tyrosine metabolism;Pyruvate metabolism;Drug metabolism - cytochrome P450;Glycolysis / Gluconeogenesis;Biosynthesis of secondary metabolites;Retinol metabolism
MAG49_gene1753	M2_2_1_k97_1695346_ORF1736	MAG49	d__Bacteria;p__Pseudomonadota;c__Gammaproteobacteria;o__Chromatiales;f__Sedimenticolaceae;g__Unclassified;s__Unclassified	2067	961	1107	K00001	adh	alcohol dehydrogenase [EC:1.1.1.1]	Metabolism of xenobiotics by cytochrome P450;Naphthalene degradation;Metabolic pathways;Degradation of aromatic compounds;Microbial metabolism in diverse environments;Fatty acid degradation;Chloroalkane and chloroalkene degradation;Tyrosine metabolism;Pyruvate metabolism;Drug metabolism - cytochrome P450;Glycolysis / Gluconeogenesis;Biosynthesis of secondary metabolites;Retinol metabolism
MAG5_gene0882	M2_2_3_k97_1099406_ORF878	MAG5	d__Bacteria;p__Gemmatimonadota;c__Gemmatimonadetes;o__Longimicrobiales;f__UBA6960;g__Unclassified;s__Unclassified	2775	3161	387	K00001	adh	alcohol dehydrogenase [EC:1.1.1.1]	Metabolism of xenobiotics by cytochrome P450;Naphthalene degradation;Metabolic pathways;Degradation of aromatic compounds;Microbial metabolism in diverse environments;Fatty acid degradation;Chloroalkane and chloroalkene degradation;Tyrosine metabolism;Pyruvate metabolism;Drug metabolism - cytochrome P450;Glycolysis / Gluconeogenesis;Biosynthesis of secondary metabolites;Retinol metabolism
MAG5_gene0883	M2_2_3_k97_1099406_ORF879	MAG5	d__Bacteria;p__Gemmatimonadota;c__Gemmatimonadetes;o__Longimicrobiales;f__UBA6960;g__Unclassified;s__Unclassified	3119	3826	708	K00001	adh	alcohol dehydrogenase [EC:1.1.1.1]	Metabolism of xenobiotics by cytochrome P450;Naphthalene degradation;Metabolic pathways;Degradation of aromatic compounds;Microbial metabolism in diverse environments;Fatty acid degradation;Chloroalkane and chloroalkene degradation;Tyrosine metabolism;Pyruvate metabolism;Drug metabolism - cytochrome P450;Glycolysis / Gluconeogenesis;Biosynthesis of secondary metabolites;Retinol metabolism
MAG50_gene0638	CPT_LW_2_k97_1073262_ORF635	MAG50	d__Archaea;p__Thermoproteota;c__Nitrososphaeria;o__Nitrososphaerales;f__Nitrososphaeraceae;g__TH5896;s__Unclassified	2	223	222	K00001	adh	alcohol dehydrogenase [EC:1.1.1.1]	Metabolism of xenobiotics by cytochrome P450;Naphthalene degradation;Metabolic pathways;Degradation of aromatic compounds;Microbial metabolism in diverse environments;Fatty acid degradation;Chloroalkane and chloroalkene degradation;Tyrosine metabolism;Pyruvate metabolism;Drug metabolism - cytochrome P450;Glycolysis / Gluconeogenesis;Biosynthesis of secondary metabolites;Retinol metabolism
MAG50_gene0916	CPT_LW_2_k97_1079952_ORF911	MAG50	d__Archaea;p__Thermoproteota;c__Nitrososphaeria;o__Nitrososphaerales;f__Nitrososphaeraceae;g__TH5896;s__Unclassified	699	1	699	K00001	adh	alcohol dehydrogenase [EC:1.1.1.1]	Metabolism of xenobiotics by cytochrome P450;Naphthalene degradation;Metabolic pathways;Degradation of aromatic compounds;Microbial metabolism in diverse environments;Fatty acid degradation;Chloroalkane and chloroalkene degradation;Tyrosine metabolism;Pyruvate metabolism;Drug metabolism - cytochrome P450;Glycolysis / Gluconeogenesis;Biosynthesis of secondary metabolites;Retinol metabolism
MAG51_gene0592	M3_1_1_k97_1494001_ORF591	MAG51	d__Bacteria;p__Pseudomonadota;c__Gammaproteobacteria;o__XN24;f__XN24;g__Unclassified;s__Unclassified	1756	569	1188	K00001	adh	alcohol dehydrogenase [EC:1.1.1.1]	Metabolism of xenobiotics by cytochrome P450;Naphthalene degradation;Metabolic pathways;Degradation of aromatic compounds;Microbial metabolism in diverse environments;Fatty acid degradation;Chloroalkane and chloroalkene degradation;Tyrosine metabolism;Pyruvate metabolism;Drug metabolism - cytochrome P450;Glycolysis / Gluconeogenesis;Biosynthesis of secondary metabolites;Retinol metabolism
MAG51_gene1120	M3_1_1_k97_593793_ORF1110	MAG51	d__Bacteria;p__Pseudomonadota;c__Gammaproteobacteria;o__XN24;f__XN24;g__Unclassified;s__Unclassified	1902	793	1110	K00001	adh	alcohol dehydrogenase [EC:1.1.1.1]	Metabolism of xenobiotics by cytochrome P450;Naphthalene degradation;Metabolic pathways;Degradation of aromatic compounds;Microbial metabolism in diverse environments;Fatty acid degradation;Chloroalkane and chloroalkene degradation;Tyrosine metabolism;Pyruvate metabolism;Drug metabolism - cytochrome P450;Glycolysis / Gluconeogenesis;Biosynthesis of secondary metabolites;Retinol metabolism
MAG51_gene1307	M3_1_1_k97_850946_ORF1296	MAG51	d__Bacteria;p__Pseudomonadota;c__Gammaproteobacteria;o__XN24;f__XN24;g__Unclassified;s__Unclassified	2909	1761	1149	K00001	adh	alcohol dehydrogenase [EC:1.1.1.1]	Metabolism of xenobiotics by cytochrome P450;Naphthalene degradation;Metabolic pathways;Degradation of aromatic compounds;Microbial metabolism in diverse environments;Fatty acid degradation;Chloroalkane and chloroalkene degradation;Tyrosine metabolism;Pyruvate metabolism;Drug metabolism - cytochrome P450;Glycolysis / Gluconeogenesis;Biosynthesis of secondary metabolites;Retinol metabolism
MAG52_gene0607	M1_2_1_k97_1125562_ORF607	MAG52	d__Bacteria;p__Bacteroidota;c__Bacteroidia;o__Flavobacteriales;f__Flavobacteriaceae;g__Robiginitalea;s__Unclassified	2330	3370	1041	K00001	adh	alcohol dehydrogenase [EC:1.1.1.1]	Metabolism of xenobiotics by cytochrome P450;Naphthalene degradation;Metabolic pathways;Degradation of aromatic compounds;Microbial metabolism in diverse environments;Fatty acid degradation;Chloroalkane and chloroalkene degradation;Tyrosine metabolism;Pyruvate metabolism;Drug metabolism - cytochrome P450;Glycolysis / Gluconeogenesis;Biosynthesis of secondary metabolites;Retinol metabolism
MAG53_gene0828	M3_1_3_k97_590881_ORF821	MAG53	d__Bacteria;p__Bacteroidota;c__Bacteroidia;o__Flavobacteriales;f__Flavobacteriaceae;g__Lutimonas;s__Unclassified	5633	4593	1041	K00001	adh	alcohol dehydrogenase [EC:1.1.1.1]	Metabolism of xenobiotics by cytochrome P450;Naphthalene degradation;Metabolic pathways;Degradation of aromatic compounds;Microbial metabolism in diverse environments;Fatty acid degradation;Chloroalkane and chloroalkene degradation;Tyrosine metabolism;Pyruvate metabolism;Drug metabolism - cytochrome P450;Glycolysis / Gluconeogenesis;Biosynthesis of secondary metabolites;Retinol metabolism
MAG54_gene2026	M3_2_1_k97_1291105_ORF2007	MAG54	d__Bacteria;p__Actinomycetota;c__Acidimicrobiia;o__Acidimicrobiales;f__Microtrichaceae;g__JAAEPF01;s__Unclassified	644	1381	738	K00001	adh	alcohol dehydrogenase [EC:1.1.1.1]	Metabolism of xenobiotics by cytochrome P450;Naphthalene degradation;Metabolic pathways;Degradation of aromatic compounds;Microbial metabolism in diverse environments;Fatty acid degradation;Chloroalkane and chloroalkene degradation;Tyrosine metabolism;Pyruvate metabolism;Drug metabolism - cytochrome P450;Glycolysis / Gluconeogenesis;Biosynthesis of secondary metabolites;Retinol metabolism
MAG54_gene2027	M3_2_1_k97_1291105_ORF2008	MAG54	d__Bacteria;p__Actinomycetota;c__Acidimicrobiia;o__Acidimicrobiales;f__Microtrichaceae;g__JAAEPF01;s__Unclassified	1415	1684	270	K00001	adh	alcohol dehydrogenase [EC:1.1.1.1]	Metabolism of xenobiotics by cytochrome P450;Naphthalene degradation;Metabolic pathways;Degradation of aromatic compounds;Microbial metabolism in diverse environments;Fatty acid degradation;Chloroalkane and chloroalkene degradation;Tyrosine metabolism;Pyruvate metabolism;Drug metabolism - cytochrome P450;Glycolysis / Gluconeogenesis;Biosynthesis of secondary metabolites;Retinol metabolism
MAG55_gene1200	M1_1_2_k97_54076_ORF1195	MAG55	d__Bacteria;p__Desulfobacterota;c__Syntrophobacteria;o__BM002;f__BM002;g__BM002;s__Unclassified	3360	4343	984	K00001	adh	alcohol dehydrogenase [EC:1.1.1.1]	Metabolism of xenobiotics by cytochrome P450;Naphthalene degradation;Metabolic pathways;Degradation of aromatic compounds;Microbial metabolism in diverse environments;Fatty acid degradation;Chloroalkane and chloroalkene degradation;Tyrosine metabolism;Pyruvate metabolism;Drug metabolism - cytochrome P450;Glycolysis / Gluconeogenesis;Biosynthesis of secondary metabolites;Retinol metabolism
MAG56_gene0689	M3_2_2_k97_940809_ORF686	MAG56	d__Bacteria;p__Planctomycetota;c__Planctomycetia;o__Pirellulales;f__Pirellulaceae;g__JAGQPK01;s__Unclassified	645	1742	1098	K00001	adh	alcohol dehydrogenase [EC:1.1.1.1]	Metabolism of xenobiotics by cytochrome P450;Naphthalene degradation;Metabolic pathways;Degradation of aromatic compounds;Microbial metabolism in diverse environments;Fatty acid degradation;Chloroalkane and chloroalkene degradation;Tyrosine metabolism;Pyruvate metabolism;Drug metabolism - cytochrome P450;Glycolysis / Gluconeogenesis;Biosynthesis of secondary metabolites;Retinol metabolism
MAG57_gene1607	M3_1_2_k97_724719_ORF1594	MAG57	d__Bacteria;p__Bacteroidota;c__Bacteroidia;o__Flavobacteriales;f__Flavobacteriaceae;g__Lutimonas;s__Unclassified	3249	4289	1041	K00001	adh	alcohol dehydrogenase [EC:1.1.1.1]	Metabolism of xenobiotics by cytochrome P450;Naphthalene degradation;Metabolic pathways;Degradation of aromatic compounds;Microbial metabolism in diverse environments;Fatty acid degradation;Chloroalkane and chloroalkene degradation;Tyrosine metabolism;Pyruvate metabolism;Drug metabolism - cytochrome P450;Glycolysis / Gluconeogenesis;Biosynthesis of secondary metabolites;Retinol metabolism
MAG6_gene2378	CPT_SW_1_k97_720923_ORF2366	MAG6	d__Bacteria;p__Chloroflexota;c__Anaerolineae;o__Anaerolineales;f__UBA4823;g__PFL25;s__Unclassified	665	3	663	K00001	adh	alcohol dehydrogenase [EC:1.1.1.1]	Metabolism of xenobiotics by cytochrome P450;Naphthalene degradation;Metabolic pathways;Degradation of aromatic compounds;Microbial metabolism in diverse environments;Fatty acid degradation;Chloroalkane and chloroalkene degradation;Tyrosine metabolism;Pyruvate metabolism;Drug metabolism - cytochrome P450;Glycolysis / Gluconeogenesis;Biosynthesis of secondary metabolites;Retinol metabolism
MAG6_gene2670	CPT_SW_1_k97_112751_ORF2653	MAG6	d__Bacteria;p__Chloroflexota;c__Anaerolineae;o__Anaerolineales;f__UBA4823;g__PFL25;s__Unclassified	831	1	831	K00001	adh	alcohol dehydrogenase [EC:1.1.1.1]	Metabolism of xenobiotics by cytochrome P450;Naphthalene degradation;Metabolic pathways;Degradation of aromatic compounds;Microbial metabolism in diverse environments;Fatty acid degradation;Chloroalkane and chloroalkene degradation;Tyrosine metabolism;Pyruvate metabolism;Drug metabolism - cytochrome P450;Glycolysis / Gluconeogenesis;Biosynthesis of secondary metabolites;Retinol metabolism
MAG6_gene2671	CPT_SW_1_k97_112751_ORF2654	MAG6	d__Bacteria;p__Chloroflexota;c__Anaerolineae;o__Anaerolineales;f__UBA4823;g__PFL25;s__Unclassified	1882	878	1005	K00001	adh	alcohol dehydrogenase [EC:1.1.1.1]	Metabolism of xenobiotics by cytochrome P450;Naphthalene degradation;Metabolic pathways;Degradation of aromatic compounds;Microbial metabolism in diverse environments;Fatty acid degradation;Chloroalkane and chloroalkene degradation;Tyrosine metabolism;Pyruvate metabolism;Drug metabolism - cytochrome P450;Glycolysis / Gluconeogenesis;Biosynthesis of secondary metabolites;Retinol metabolism
MAG6_gene2846	CPT_SW_1_k97_1118940_ORF2829	MAG6	d__Bacteria;p__Chloroflexota;c__Anaerolineae;o__Anaerolineales;f__UBA4823;g__PFL25;s__Unclassified	1333	2316	984	K00001	adh	alcohol dehydrogenase [EC:1.1.1.1]	Metabolism of xenobiotics by cytochrome P450;Naphthalene degradation;Metabolic pathways;Degradation of aromatic compounds;Microbial metabolism in diverse environments;Fatty acid degradation;Chloroalkane and chloroalkene degradation;Tyrosine metabolism;Pyruvate metabolism;Drug metabolism - cytochrome P450;Glycolysis / Gluconeogenesis;Biosynthesis of secondary metabolites;Retinol metabolism
MAG6_gene3323	CPT_SW_1_k97_1123674_ORF3305	MAG6	d__Bacteria;p__Chloroflexota;c__Anaerolineae;o__Anaerolineales;f__UBA4823;g__PFL25;s__Unclassified	1760	1350	411	K00001	adh	alcohol dehydrogenase [EC:1.1.1.1]	Metabolism of xenobiotics by cytochrome P450;Naphthalene degradation;Metabolic pathways;Degradation of aromatic compounds;Microbial metabolism in diverse environments;Fatty acid degradation;Chloroalkane and chloroalkene degradation;Tyrosine metabolism;Pyruvate metabolism;Drug metabolism - cytochrome P450;Glycolysis / Gluconeogenesis;Biosynthesis of secondary metabolites;Retinol metabolism
MAG60_gene1414	M1_1_3_k97_284933_ORF1403	MAG60	d__Bacteria;p__Desulfobacterota;c__Desulfobulbia;o__Desulfobulbales;f__Desulfocapsaceae;g__JABDQA01;s__Unclassified	1841	1500	342	K00001	adh	alcohol dehydrogenase [EC:1.1.1.1]	Metabolism of xenobiotics by cytochrome P450;Naphthalene degradation;Metabolic pathways;Degradation of aromatic compounds;Microbial metabolism in diverse environments;Fatty acid degradation;Chloroalkane and chloroalkene degradation;Tyrosine metabolism;Pyruvate metabolism;Drug metabolism - cytochrome P450;Glycolysis / Gluconeogenesis;Biosynthesis of secondary metabolites;Retinol metabolism
MAG60_gene1652	M1_1_3_k97_504108_ORF1640	MAG60	d__Bacteria;p__Desulfobacterota;c__Desulfobulbia;o__Desulfobulbales;f__Desulfocapsaceae;g__JABDQA01;s__Unclassified	1	1161	1161	K00001	adh	alcohol dehydrogenase [EC:1.1.1.1]	Metabolism of xenobiotics by cytochrome P450;Naphthalene degradation;Metabolic pathways;Degradation of aromatic compounds;Microbial metabolism in diverse environments;Fatty acid degradation;Chloroalkane and chloroalkene degradation;Tyrosine metabolism;Pyruvate metabolism;Drug metabolism - cytochrome P450;Glycolysis / Gluconeogenesis;Biosynthesis of secondary metabolites;Retinol metabolism
MAG60_gene2248	M1_1_3_k97_1076410_ORF2233	MAG60	d__Bacteria;p__Desulfobacterota;c__Desulfobulbia;o__Desulfobulbales;f__Desulfocapsaceae;g__JABDQA01;s__Unclassified	78	1139	1062	K00001	adh	alcohol dehydrogenase [EC:1.1.1.1]	Metabolism of xenobiotics by cytochrome P450;Naphthalene degradation;Metabolic pathways;Degradation of aromatic compounds;Microbial metabolism in diverse environments;Fatty acid degradation;Chloroalkane and chloroalkene degradation;Tyrosine metabolism;Pyruvate metabolism;Drug metabolism - cytochrome P450;Glycolysis / Gluconeogenesis;Biosynthesis of secondary metabolites;Retinol metabolism
MAG61_gene0028	FG_WR_1_k97_1065793_ORF28	MAG61	d__Bacteria;p__Pseudomonadota;c__Gammaproteobacteria;o__Woeseiales;f__Woeseiaceae;g__JAACFE01;s__Unclassified	24688	23585	1104	K00001	adh	alcohol dehydrogenase [EC:1.1.1.1]	Metabolism of xenobiotics by cytochrome P450;Naphthalene degradation;Metabolic pathways;Degradation of aromatic compounds;Microbial metabolism in diverse environments;Fatty acid degradation;Chloroalkane and chloroalkene degradation;Tyrosine metabolism;Pyruvate metabolism;Drug metabolism - cytochrome P450;Glycolysis / Gluconeogenesis;Biosynthesis of secondary metabolites;Retinol metabolism
MAG61_gene1050	FG_WR_1_k97_1298633_ORF1041	MAG61	d__Bacteria;p__Pseudomonadota;c__Gammaproteobacteria;o__Woeseiales;f__Woeseiaceae;g__JAACFE01;s__Unclassified	6614	7558	945	K00001	adh	alcohol dehydrogenase [EC:1.1.1.1]	Metabolism of xenobiotics by cytochrome P450;Naphthalene degradation;Metabolic pathways;Degradation of aromatic compounds;Microbial metabolism in diverse environments;Fatty acid degradation;Chloroalkane and chloroalkene degradation;Tyrosine metabolism;Pyruvate metabolism;Drug metabolism - cytochrome P450;Glycolysis / Gluconeogenesis;Biosynthesis of secondary metabolites;Retinol metabolism
MAG61_gene1741	FG_WR_1_k97_150681_ORF1725	MAG61	d__Bacteria;p__Pseudomonadota;c__Gammaproteobacteria;o__Woeseiales;f__Woeseiaceae;g__JAACFE01;s__Unclassified	4133	3093	1041	K00001	adh	alcohol dehydrogenase [EC:1.1.1.1]	Metabolism of xenobiotics by cytochrome P450;Naphthalene degradation;Metabolic pathways;Degradation of aromatic compounds;Microbial metabolism in diverse environments;Fatty acid degradation;Chloroalkane and chloroalkene degradation;Tyrosine metabolism;Pyruvate metabolism;Drug metabolism - cytochrome P450;Glycolysis / Gluconeogenesis;Biosynthesis of secondary metabolites;Retinol metabolism
MAG62_gene0767	CPT_MZ_2_k97_1799_ORF764	MAG62	d__Bacteria;p__Chloroflexota;c__Anaerolineae;o__Anaerolineales;f__UBA4823;g__PFL25;s__Unclassified	3937	4866	930	K00001	adh	alcohol dehydrogenase [EC:1.1.1.1]	Metabolism of xenobiotics by cytochrome P450;Naphthalene degradation;Metabolic pathways;Degradation of aromatic compounds;Microbial metabolism in diverse environments;Fatty acid degradation;Chloroalkane and chloroalkene degradation;Tyrosine metabolism;Pyruvate metabolism;Drug metabolism - cytochrome P450;Glycolysis / Gluconeogenesis;Biosynthesis of secondary metabolites;Retinol metabolism
MAG62_gene1087	CPT_MZ_2_k97_249363_ORF1081	MAG62	d__Bacteria;p__Chloroflexota;c__Anaerolineae;o__Anaerolineales;f__UBA4823;g__PFL25;s__Unclassified	1641	625	1017	K00001	adh	alcohol dehydrogenase [EC:1.1.1.1]	Metabolism of xenobiotics by cytochrome P450;Naphthalene degradation;Metabolic pathways;Degradation of aromatic compounds;Microbial metabolism in diverse environments;Fatty acid degradation;Chloroalkane and chloroalkene degradation;Tyrosine metabolism;Pyruvate metabolism;Drug metabolism - cytochrome P450;Glycolysis / Gluconeogenesis;Biosynthesis of secondary metabolites;Retinol metabolism
MAG62_gene1088	CPT_MZ_2_k97_249363_ORF1082	MAG62	d__Bacteria;p__Chloroflexota;c__Anaerolineae;o__Anaerolineales;f__UBA4823;g__PFL25;s__Unclassified	2692	1688	1005	K00001	adh	alcohol dehydrogenase [EC:1.1.1.1]	Metabolism of xenobiotics by cytochrome P450;Naphthalene degradation;Metabolic pathways;Degradation of aromatic compounds;Microbial metabolism in diverse environments;Fatty acid degradation;Chloroalkane and chloroalkene degradation;Tyrosine metabolism;Pyruvate metabolism;Drug metabolism - cytochrome P450;Glycolysis / Gluconeogenesis;Biosynthesis of secondary metabolites;Retinol metabolism
MAG62_gene2041	CPT_MZ_2_k97_1149306_ORF2027	MAG62	d__Bacteria;p__Chloroflexota;c__Anaerolineae;o__Anaerolineales;f__UBA4823;g__PFL25;s__Unclassified	2195	1350	846	K00001	adh	alcohol dehydrogenase [EC:1.1.1.1]	Metabolism of xenobiotics by cytochrome P450;Naphthalene degradation;Metabolic pathways;Degradation of aromatic compounds;Microbial metabolism in diverse environments;Fatty acid degradation;Chloroalkane and chloroalkene degradation;Tyrosine metabolism;Pyruvate metabolism;Drug metabolism - cytochrome P450;Glycolysis / Gluconeogenesis;Biosynthesis of secondary metabolites;Retinol metabolism
MAG63_gene1127	M2_2_3_k97_1345351_ORF1116	MAG63	d__Bacteria;p__Desulfobacterota;c__Desulfobulbia;o__Desulfobulbales;f__Desulfocapsaceae;g__JABDQA01;s__Unclassified	966	1	966	K00001	adh	alcohol dehydrogenase [EC:1.1.1.1]	Metabolism of xenobiotics by cytochrome P450;Naphthalene degradation;Metabolic pathways;Degradation of aromatic compounds;Microbial metabolism in diverse environments;Fatty acid degradation;Chloroalkane and chloroalkene degradation;Tyrosine metabolism;Pyruvate metabolism;Drug metabolism - cytochrome P450;Glycolysis / Gluconeogenesis;Biosynthesis of secondary metabolites;Retinol metabolism
MAG63_gene3290	M2_2_3_k97_1729454_ORF3267	MAG63	d__Bacteria;p__Desulfobacterota;c__Desulfobulbia;o__Desulfobulbales;f__Desulfocapsaceae;g__JABDQA01;s__Unclassified	1808	1335	474	K00001	adh	alcohol dehydrogenase [EC:1.1.1.1]	Metabolism of xenobiotics by cytochrome P450;Naphthalene degradation;Metabolic pathways;Degradation of aromatic compounds;Microbial metabolism in diverse environments;Fatty acid degradation;Chloroalkane and chloroalkene degradation;Tyrosine metabolism;Pyruvate metabolism;Drug metabolism - cytochrome P450;Glycolysis / Gluconeogenesis;Biosynthesis of secondary metabolites;Retinol metabolism
MAG64_gene0394	FG_WR_1_k97_934860_ORF392	MAG64	d__Bacteria;p__Bacteroidota;c__Bacteroidia;o__Bacteroidales;f__VadinHA17;g__SR-FBR-E99;s__SR-FBR-E99 sp006227095	401	1609	1209	K00001	adh	alcohol dehydrogenase [EC:1.1.1.1]	Metabolism of xenobiotics by cytochrome P450;Naphthalene degradation;Metabolic pathways;Degradation of aromatic compounds;Microbial metabolism in diverse environments;Fatty acid degradation;Chloroalkane and chloroalkene degradation;Tyrosine metabolism;Pyruvate metabolism;Drug metabolism - cytochrome P450;Glycolysis / Gluconeogenesis;Biosynthesis of secondary metabolites;Retinol metabolism
MAG65_gene0694	M2_2_3_k97_877038_ORF694	MAG65	d__Bacteria;p__Bacteroidota;c__Bacteroidia;o__Bacteroidales;f__Prolixibacteraceae;g__Draconibacterium;s__Unclassified	1	903	903	K00001	adh	alcohol dehydrogenase [EC:1.1.1.1]	Metabolism of xenobiotics by cytochrome P450;Naphthalene degradation;Metabolic pathways;Degradation of aromatic compounds;Microbial metabolism in diverse environments;Fatty acid degradation;Chloroalkane and chloroalkene degradation;Tyrosine metabolism;Pyruvate metabolism;Drug metabolism - cytochrome P450;Glycolysis / Gluconeogenesis;Biosynthesis of secondary metabolites;Retinol metabolism
MAG66_gene1076	FG_WR_1_k97_428367_ORF1069	MAG66	d__Bacteria;p__Planctomycetota;c__Planctomycetia;o__Pirellulales;f__Pirellulaceae;g__Rubripirellula;s__Unclassified	6087	5128	960	K00001	adh	alcohol dehydrogenase [EC:1.1.1.1]	Metabolism of xenobiotics by cytochrome P450;Naphthalene degradation;Metabolic pathways;Degradation of aromatic compounds;Microbial metabolism in diverse environments;Fatty acid degradation;Chloroalkane and chloroalkene degradation;Tyrosine metabolism;Pyruvate metabolism;Drug metabolism - cytochrome P450;Glycolysis / Gluconeogenesis;Biosynthesis of secondary metabolites;Retinol metabolism
MAG66_gene2524	FG_WR_1_k97_968192_ORF2512	MAG66	d__Bacteria;p__Planctomycetota;c__Planctomycetia;o__Pirellulales;f__Pirellulaceae;g__Rubripirellula;s__Unclassified	2740	3759	1020	K00001	adh	alcohol dehydrogenase [EC:1.1.1.1]	Metabolism of xenobiotics by cytochrome P450;Naphthalene degradation;Metabolic pathways;Degradation of aromatic compounds;Microbial metabolism in diverse environments;Fatty acid degradation;Chloroalkane and chloroalkene degradation;Tyrosine metabolism;Pyruvate metabolism;Drug metabolism - cytochrome P450;Glycolysis / Gluconeogenesis;Biosynthesis of secondary metabolites;Retinol metabolism
MAG67_gene2338	FG_SC_3_k97_455659_ORF2314	MAG67	d__Bacteria;p__Pseudomonadota;c__Gammaproteobacteria;o__Steroidobacterales;f__Steroidobacteraceae;g__SG8-30;s__Unclassified	1736	675	1062	K00001	adh	alcohol dehydrogenase [EC:1.1.1.1]	Metabolism of xenobiotics by cytochrome P450;Naphthalene degradation;Metabolic pathways;Degradation of aromatic compounds;Microbial metabolism in diverse environments;Fatty acid degradation;Chloroalkane and chloroalkene degradation;Tyrosine metabolism;Pyruvate metabolism;Drug metabolism - cytochrome P450;Glycolysis / Gluconeogenesis;Biosynthesis of secondary metabolites;Retinol metabolism
MAG68_gene1531	FG_WR_2_k97_1457158_ORF1517	MAG68	d__Bacteria;p__Bacteroidota;c__Bacteroidia;o__Chitinophagales;f__Saprospiraceae;g__Unclassified;s__Unclassified	5150	4119	1032	K00001	adh	alcohol dehydrogenase [EC:1.1.1.1]	Metabolism of xenobiotics by cytochrome P450;Naphthalene degradation;Metabolic pathways;Degradation of aromatic compounds;Microbial metabolism in diverse environments;Fatty acid degradation;Chloroalkane and chloroalkene degradation;Tyrosine metabolism;Pyruvate metabolism;Drug metabolism - cytochrome P450;Glycolysis / Gluconeogenesis;Biosynthesis of secondary metabolites;Retinol metabolism
MAG69_gene0721	CPT_SW_2_k97_1078311_ORF720	MAG69	d__Bacteria;p__Chloroflexota;c__Anaerolineae;o__Anaerolineales;f__EnvOPS12;g__JAABUE01;s__Unclassified	4983	3964	1020	K00001	adh	alcohol dehydrogenase [EC:1.1.1.1]	Metabolism of xenobiotics by cytochrome P450;Naphthalene degradation;Metabolic pathways;Degradation of aromatic compounds;Microbial metabolism in diverse environments;Fatty acid degradation;Chloroalkane and chloroalkene degradation;Tyrosine metabolism;Pyruvate metabolism;Drug metabolism - cytochrome P450;Glycolysis / Gluconeogenesis;Biosynthesis of secondary metabolites;Retinol metabolism
MAG69_gene1251	CPT_SW_2_k97_747227_ORF1244	MAG69	d__Bacteria;p__Chloroflexota;c__Anaerolineae;o__Anaerolineales;f__EnvOPS12;g__JAABUE01;s__Unclassified	1	924	924	K00001	adh	alcohol dehydrogenase [EC:1.1.1.1]	Metabolism of xenobiotics by cytochrome P450;Naphthalene degradation;Metabolic pathways;Degradation of aromatic compounds;Microbial metabolism in diverse environments;Fatty acid degradation;Chloroalkane and chloroalkene degradation;Tyrosine metabolism;Pyruvate metabolism;Drug metabolism - cytochrome P450;Glycolysis / Gluconeogenesis;Biosynthesis of secondary metabolites;Retinol metabolism
MAG69_gene1252	CPT_SW_2_k97_747227_ORF1245	MAG69	d__Bacteria;p__Chloroflexota;c__Anaerolineae;o__Anaerolineales;f__EnvOPS12;g__JAABUE01;s__Unclassified	939	1913	975	K00001	adh	alcohol dehydrogenase [EC:1.1.1.1]	Metabolism of xenobiotics by cytochrome P450;Naphthalene degradation;Metabolic pathways;Degradation of aromatic compounds;Microbial metabolism in diverse environments;Fatty acid degradation;Chloroalkane and chloroalkene degradation;Tyrosine metabolism;Pyruvate metabolism;Drug metabolism - cytochrome P450;Glycolysis / Gluconeogenesis;Biosynthesis of secondary metabolites;Retinol metabolism
MAG69_gene2180	CPT_SW_2_k97_389769_ORF2165	MAG69	d__Bacteria;p__Chloroflexota;c__Anaerolineae;o__Anaerolineales;f__EnvOPS12;g__JAABUE01;s__Unclassified	200	1333	1134	K00001	adh	alcohol dehydrogenase [EC:1.1.1.1]	Metabolism of xenobiotics by cytochrome P450;Naphthalene degradation;Metabolic pathways;Degradation of aromatic compounds;Microbial metabolism in diverse environments;Fatty acid degradation;Chloroalkane and chloroalkene degradation;Tyrosine metabolism;Pyruvate metabolism;Drug metabolism - cytochrome P450;Glycolysis / Gluconeogenesis;Biosynthesis of secondary metabolites;Retinol metabolism
MAG7_gene0816	M1_1_3_k97_300260_ORF806	MAG7	d__Bacteria;p__Actinomycetota;c__Actinomycetia;o__Jiangellales;f__Unclassified;g__Unclassified;s__Unclassified	7799	8836	1038	K00001	adh	alcohol dehydrogenase [EC:1.1.1.1]	Metabolism of xenobiotics by cytochrome P450;Naphthalene degradation;Metabolic pathways;Degradation of aromatic compounds;Microbial metabolism in diverse environments;Fatty acid degradation;Chloroalkane and chloroalkene degradation;Tyrosine metabolism;Pyruvate metabolism;Drug metabolism - cytochrome P450;Glycolysis / Gluconeogenesis;Biosynthesis of secondary metabolites;Retinol metabolism
MAG7_gene2020	M1_1_3_k97_265070_ORF1994	MAG7	d__Bacteria;p__Actinomycetota;c__Actinomycetia;o__Jiangellales;f__Unclassified;g__Unclassified;s__Unclassified	3685	3413	273	K00001	adh	alcohol dehydrogenase [EC:1.1.1.1]	Metabolism of xenobiotics by cytochrome P450;Naphthalene degradation;Metabolic pathways;Degradation of aromatic compounds;Microbial metabolism in diverse environments;Fatty acid degradation;Chloroalkane and chloroalkene degradation;Tyrosine metabolism;Pyruvate metabolism;Drug metabolism - cytochrome P450;Glycolysis / Gluconeogenesis;Biosynthesis of secondary metabolites;Retinol metabolism
MAG70_gene1898	DY_1_k97_336558_ORF1888	MAG70	d__Bacteria;p__Pseudomonadota;c__Gammaproteobacteria;o__Burkholderiales;f__Burkholderiaceae_A;g__JADJWR01;s__JADJWR01 sp020355165	4059	3112	948	K00001	adh	alcohol dehydrogenase [EC:1.1.1.1]	Metabolism of xenobiotics by cytochrome P450;Naphthalene degradation;Metabolic pathways;Degradation of aromatic compounds;Microbial metabolism in diverse environments;Fatty acid degradation;Chloroalkane and chloroalkene degradation;Tyrosine metabolism;Pyruvate metabolism;Drug metabolism - cytochrome P450;Glycolysis / Gluconeogenesis;Biosynthesis of secondary metabolites;Retinol metabolism
MAG70_gene2189	DY_1_k97_514878_ORF2177	MAG70	d__Bacteria;p__Pseudomonadota;c__Gammaproteobacteria;o__Burkholderiales;f__Burkholderiaceae_A;g__JADJWR01;s__JADJWR01 sp020355165	2265	3278	1014	K00001	adh	alcohol dehydrogenase [EC:1.1.1.1]	Metabolism of xenobiotics by cytochrome P450;Naphthalene degradation;Metabolic pathways;Degradation of aromatic compounds;Microbial metabolism in diverse environments;Fatty acid degradation;Chloroalkane and chloroalkene degradation;Tyrosine metabolism;Pyruvate metabolism;Drug metabolism - cytochrome P450;Glycolysis / Gluconeogenesis;Biosynthesis of secondary metabolites;Retinol metabolism
MAG71_gene2393	CPT_MZ_2_k97_451675_ORF2377	MAG71	d__Bacteria;p__Chloroflexota;c__Anaerolineae;o__Promineofilales;f__Promineofilaceae;g__UBA11865;s__Unclassified	2708	2112	597	K00001	adh	alcohol dehydrogenase [EC:1.1.1.1]	Metabolism of xenobiotics by cytochrome P450;Naphthalene degradation;Metabolic pathways;Degradation of aromatic compounds;Microbial metabolism in diverse environments;Fatty acid degradation;Chloroalkane and chloroalkene degradation;Tyrosine metabolism;Pyruvate metabolism;Drug metabolism - cytochrome P450;Glycolysis / Gluconeogenesis;Biosynthesis of secondary metabolites;Retinol metabolism
MAG71_gene2655	CPT_MZ_2_k97_349457_ORF2637	MAG71	d__Bacteria;p__Chloroflexota;c__Anaerolineae;o__Promineofilales;f__Promineofilaceae;g__UBA11865;s__Unclassified	1274	2305	1032	K00001	adh	alcohol dehydrogenase [EC:1.1.1.1]	Metabolism of xenobiotics by cytochrome P450;Naphthalene degradation;Metabolic pathways;Degradation of aromatic compounds;Microbial metabolism in diverse environments;Fatty acid degradation;Chloroalkane and chloroalkene degradation;Tyrosine metabolism;Pyruvate metabolism;Drug metabolism - cytochrome P450;Glycolysis / Gluconeogenesis;Biosynthesis of secondary metabolites;Retinol metabolism
MAG71_gene2731	CPT_MZ_2_k97_725703_ORF2713	MAG71	d__Bacteria;p__Chloroflexota;c__Anaerolineae;o__Promineofilales;f__Promineofilaceae;g__UBA11865;s__Unclassified	1942	2466	525	K00001	adh	alcohol dehydrogenase [EC:1.1.1.1]	Metabolism of xenobiotics by cytochrome P450;Naphthalene degradation;Metabolic pathways;Degradation of aromatic compounds;Microbial metabolism in diverse environments;Fatty acid degradation;Chloroalkane and chloroalkene degradation;Tyrosine metabolism;Pyruvate metabolism;Drug metabolism - cytochrome P450;Glycolysis / Gluconeogenesis;Biosynthesis of secondary metabolites;Retinol metabolism
MAG73_gene0237	M2_1_2_k97_1510513_ORF237	MAG73	d__Bacteria;p__Actinomycetota;c__Actinomycetia;o__Actinomycetales;f__Dermatophilaceae;g__Phycicoccus;s__Unclassified	11086	10118	969	K00001	adh	alcohol dehydrogenase [EC:1.1.1.1]	Metabolism of xenobiotics by cytochrome P450;Naphthalene degradation;Metabolic pathways;Degradation of aromatic compounds;Microbial metabolism in diverse environments;Fatty acid degradation;Chloroalkane and chloroalkene degradation;Tyrosine metabolism;Pyruvate metabolism;Drug metabolism - cytochrome P450;Glycolysis / Gluconeogenesis;Biosynthesis of secondary metabolites;Retinol metabolism
MAG73_gene1462	M2_1_2_k97_303639_ORF1448	MAG73	d__Bacteria;p__Actinomycetota;c__Actinomycetia;o__Actinomycetales;f__Dermatophilaceae;g__Phycicoccus;s__Unclassified	1343	309	1035	K00001	adh	alcohol dehydrogenase [EC:1.1.1.1]	Metabolism of xenobiotics by cytochrome P450;Naphthalene degradation;Metabolic pathways;Degradation of aromatic compounds;Microbial metabolism in diverse environments;Fatty acid degradation;Chloroalkane and chloroalkene degradation;Tyrosine metabolism;Pyruvate metabolism;Drug metabolism - cytochrome P450;Glycolysis / Gluconeogenesis;Biosynthesis of secondary metabolites;Retinol metabolism
MAG73_gene1933	M2_1_2_k97_1319019_ORF1912	MAG73	d__Bacteria;p__Actinomycetota;c__Actinomycetia;o__Actinomycetales;f__Dermatophilaceae;g__Phycicoccus;s__Unclassified	3	224	222	K00001	adh	alcohol dehydrogenase [EC:1.1.1.1]	Metabolism of xenobiotics by cytochrome P450;Naphthalene degradation;Metabolic pathways;Degradation of aromatic compounds;Microbial metabolism in diverse environments;Fatty acid degradation;Chloroalkane and chloroalkene degradation;Tyrosine metabolism;Pyruvate metabolism;Drug metabolism - cytochrome P450;Glycolysis / Gluconeogenesis;Biosynthesis of secondary metabolites;Retinol metabolism
MAG73_gene2916	M2_1_2_k97_1610139_ORF2889	MAG73	d__Bacteria;p__Actinomycetota;c__Actinomycetia;o__Actinomycetales;f__Dermatophilaceae;g__Phycicoccus;s__Unclassified	473	1510	1038	K00001	adh	alcohol dehydrogenase [EC:1.1.1.1]	Metabolism of xenobiotics by cytochrome P450;Naphthalene degradation;Metabolic pathways;Degradation of aromatic compounds;Microbial metabolism in diverse environments;Fatty acid degradation;Chloroalkane and chloroalkene degradation;Tyrosine metabolism;Pyruvate metabolism;Drug metabolism - cytochrome P450;Glycolysis / Gluconeogenesis;Biosynthesis of secondary metabolites;Retinol metabolism
MAG75_gene0780	DY_1_k97_59364_ORF778	MAG75	d__Bacteria;p__Chloroflexota;c__Anaerolineae;o__Anaerolineales;f__UBA4823;g__PFL25;s__Unclassified	10116	9061	1056	K00001	adh	alcohol dehydrogenase [EC:1.1.1.1]	Metabolism of xenobiotics by cytochrome P450;Naphthalene degradation;Metabolic pathways;Degradation of aromatic compounds;Microbial metabolism in diverse environments;Fatty acid degradation;Chloroalkane and chloroalkene degradation;Tyrosine metabolism;Pyruvate metabolism;Drug metabolism - cytochrome P450;Glycolysis / Gluconeogenesis;Biosynthesis of secondary metabolites;Retinol metabolism
MAG75_gene1184	DY_1_k97_757735_ORF1178	MAG75	d__Bacteria;p__Chloroflexota;c__Anaerolineae;o__Anaerolineales;f__UBA4823;g__PFL25;s__Unclassified	3565	2600	966	K00001	adh	alcohol dehydrogenase [EC:1.1.1.1]	Metabolism of xenobiotics by cytochrome P450;Naphthalene degradation;Metabolic pathways;Degradation of aromatic compounds;Microbial metabolism in diverse environments;Fatty acid degradation;Chloroalkane and chloroalkene degradation;Tyrosine metabolism;Pyruvate metabolism;Drug metabolism - cytochrome P450;Glycolysis / Gluconeogenesis;Biosynthesis of secondary metabolites;Retinol metabolism
MAG75_gene1185	DY_1_k97_757735_ORF1179	MAG75	d__Bacteria;p__Chloroflexota;c__Anaerolineae;o__Anaerolineales;f__UBA4823;g__PFL25;s__Unclassified	4590	3601	990	K00001	adh	alcohol dehydrogenase [EC:1.1.1.1]	Metabolism of xenobiotics by cytochrome P450;Naphthalene degradation;Metabolic pathways;Degradation of aromatic compounds;Microbial metabolism in diverse environments;Fatty acid degradation;Chloroalkane and chloroalkene degradation;Tyrosine metabolism;Pyruvate metabolism;Drug metabolism - cytochrome P450;Glycolysis / Gluconeogenesis;Biosynthesis of secondary metabolites;Retinol metabolism
MAG75_gene2289	DY_1_k97_878708_ORF2269	MAG75	d__Bacteria;p__Chloroflexota;c__Anaerolineae;o__Anaerolineales;f__UBA4823;g__PFL25;s__Unclassified	3836	4798	963	K00001	adh	alcohol dehydrogenase [EC:1.1.1.1]	Metabolism of xenobiotics by cytochrome P450;Naphthalene degradation;Metabolic pathways;Degradation of aromatic compounds;Microbial metabolism in diverse environments;Fatty acid degradation;Chloroalkane and chloroalkene degradation;Tyrosine metabolism;Pyruvate metabolism;Drug metabolism - cytochrome P450;Glycolysis / Gluconeogenesis;Biosynthesis of secondary metabolites;Retinol metabolism
MAG75_gene3058	DY_1_k97_347812_ORF3036	MAG75	d__Bacteria;p__Chloroflexota;c__Anaerolineae;o__Anaerolineales;f__UBA4823;g__PFL25;s__Unclassified	2238	1267	972	K00001	adh	alcohol dehydrogenase [EC:1.1.1.1]	Metabolism of xenobiotics by cytochrome P450;Naphthalene degradation;Metabolic pathways;Degradation of aromatic compounds;Microbial metabolism in diverse environments;Fatty acid degradation;Chloroalkane and chloroalkene degradation;Tyrosine metabolism;Pyruvate metabolism;Drug metabolism - cytochrome P450;Glycolysis / Gluconeogenesis;Biosynthesis of secondary metabolites;Retinol metabolism
MAG75_gene3198	DY_1_k97_59170_ORF3175	MAG75	d__Bacteria;p__Chloroflexota;c__Anaerolineae;o__Anaerolineales;f__UBA4823;g__PFL25;s__Unclassified	593	3	591	K00001	adh	alcohol dehydrogenase [EC:1.1.1.1]	Metabolism of xenobiotics by cytochrome P450;Naphthalene degradation;Metabolic pathways;Degradation of aromatic compounds;Microbial metabolism in diverse environments;Fatty acid degradation;Chloroalkane and chloroalkene degradation;Tyrosine metabolism;Pyruvate metabolism;Drug metabolism - cytochrome P450;Glycolysis / Gluconeogenesis;Biosynthesis of secondary metabolites;Retinol metabolism
MAG75_gene3395	DY_1_k97_7081_ORF3372	MAG75	d__Bacteria;p__Chloroflexota;c__Anaerolineae;o__Anaerolineales;f__UBA4823;g__PFL25;s__Unclassified	3	680	678	K00001	adh	alcohol dehydrogenase [EC:1.1.1.1]	Metabolism of xenobiotics by cytochrome P450;Naphthalene degradation;Metabolic pathways;Degradation of aromatic compounds;Microbial metabolism in diverse environments;Fatty acid degradation;Chloroalkane and chloroalkene degradation;Tyrosine metabolism;Pyruvate metabolism;Drug metabolism - cytochrome P450;Glycolysis / Gluconeogenesis;Biosynthesis of secondary metabolites;Retinol metabolism
MAG75_gene3787	DY_1_k97_869391_ORF3760	MAG75	d__Bacteria;p__Chloroflexota;c__Anaerolineae;o__Anaerolineales;f__UBA4823;g__PFL25;s__Unclassified	2	748	747	K00001	adh	alcohol dehydrogenase [EC:1.1.1.1]	Metabolism of xenobiotics by cytochrome P450;Naphthalene degradation;Metabolic pathways;Degradation of aromatic compounds;Microbial metabolism in diverse environments;Fatty acid degradation;Chloroalkane and chloroalkene degradation;Tyrosine metabolism;Pyruvate metabolism;Drug metabolism - cytochrome P450;Glycolysis / Gluconeogenesis;Biosynthesis of secondary metabolites;Retinol metabolism
MAG76_gene1969	DY_1_k97_713984_ORF1934	MAG76	d__Bacteria;p__Gemmatimonadota;c__Gemmatimonadetes;o__KS3-K002;f__JABDQB01;g__Unclassified;s__Unclassified	2280	1228	1053	K00001	adh	alcohol dehydrogenase [EC:1.1.1.1]	Metabolism of xenobiotics by cytochrome P450;Naphthalene degradation;Metabolic pathways;Degradation of aromatic compounds;Microbial metabolism in diverse environments;Fatty acid degradation;Chloroalkane and chloroalkene degradation;Tyrosine metabolism;Pyruvate metabolism;Drug metabolism - cytochrome P450;Glycolysis / Gluconeogenesis;Biosynthesis of secondary metabolites;Retinol metabolism
MAG77_gene0595	FG_SC_2_k97_234233_ORF593	MAG77	d__Bacteria;p__Chloroflexota;c__Anaerolineae;o__Anaerolineales;f__DRKV01;g__JAGUYX01;s__Unclassified	2352	3383	1032	K00001	adh	alcohol dehydrogenase [EC:1.1.1.1]	Metabolism of xenobiotics by cytochrome P450;Naphthalene degradation;Metabolic pathways;Degradation of aromatic compounds;Microbial metabolism in diverse environments;Fatty acid degradation;Chloroalkane and chloroalkene degradation;Tyrosine metabolism;Pyruvate metabolism;Drug metabolism - cytochrome P450;Glycolysis / Gluconeogenesis;Biosynthesis of secondary metabolites;Retinol metabolism
MAG77_gene0819	FG_SC_2_k97_517909_ORF816	MAG77	d__Bacteria;p__Chloroflexota;c__Anaerolineae;o__Anaerolineales;f__DRKV01;g__JAGUYX01;s__Unclassified	3700	2711	990	K00001	adh	alcohol dehydrogenase [EC:1.1.1.1]	Metabolism of xenobiotics by cytochrome P450;Naphthalene degradation;Metabolic pathways;Degradation of aromatic compounds;Microbial metabolism in diverse environments;Fatty acid degradation;Chloroalkane and chloroalkene degradation;Tyrosine metabolism;Pyruvate metabolism;Drug metabolism - cytochrome P450;Glycolysis / Gluconeogenesis;Biosynthesis of secondary metabolites;Retinol metabolism
MAG78_gene2510	M3_2_2_k97_1699196_ORF2484	MAG78	d__Bacteria;p__Bacteroidota;c__Bacteroidia;o__Flavobacteriales;f__Flavobacteriaceae;g__Lutimonas;s__Unclassified	2362	1847	516	K00001	adh	alcohol dehydrogenase [EC:1.1.1.1]	Metabolism of xenobiotics by cytochrome P450;Naphthalene degradation;Metabolic pathways;Degradation of aromatic compounds;Microbial metabolism in diverse environments;Fatty acid degradation;Chloroalkane and chloroalkene degradation;Tyrosine metabolism;Pyruvate metabolism;Drug metabolism - cytochrome P450;Glycolysis / Gluconeogenesis;Biosynthesis of secondary metabolites;Retinol metabolism
MAG79_gene1577	M2_1_3_k97_197991_ORF1556	MAG79	d__Bacteria;p__Actinomycetota;c__Actinomycetia;o__Jiangellales;f__Unclassified;g__Unclassified;s__Unclassified	3645	2608	1038	K00001	adh	alcohol dehydrogenase [EC:1.1.1.1]	Metabolism of xenobiotics by cytochrome P450;Naphthalene degradation;Metabolic pathways;Degradation of aromatic compounds;Microbial metabolism in diverse environments;Fatty acid degradation;Chloroalkane and chloroalkene degradation;Tyrosine metabolism;Pyruvate metabolism;Drug metabolism - cytochrome P450;Glycolysis / Gluconeogenesis;Biosynthesis of secondary metabolites;Retinol metabolism
MAG79_gene1662	M2_1_3_k97_502518_ORF1640	MAG79	d__Bacteria;p__Actinomycetota;c__Actinomycetia;o__Jiangellales;f__Unclassified;g__Unclassified;s__Unclassified	3	347	345	K00001	adh	alcohol dehydrogenase [EC:1.1.1.1]	Metabolism of xenobiotics by cytochrome P450;Naphthalene degradation;Metabolic pathways;Degradation of aromatic compounds;Microbial metabolism in diverse environments;Fatty acid degradation;Chloroalkane and chloroalkene degradation;Tyrosine metabolism;Pyruvate metabolism;Drug metabolism - cytochrome P450;Glycolysis / Gluconeogenesis;Biosynthesis of secondary metabolites;Retinol metabolism
MAG79_gene1967	M2_1_3_k97_475829_ORF1945	MAG79	d__Bacteria;p__Actinomycetota;c__Actinomycetia;o__Jiangellales;f__Unclassified;g__Unclassified;s__Unclassified	2372	3151	780	K00001	adh	alcohol dehydrogenase [EC:1.1.1.1]	Metabolism of xenobiotics by cytochrome P450;Naphthalene degradation;Metabolic pathways;Degradation of aromatic compounds;Microbial metabolism in diverse environments;Fatty acid degradation;Chloroalkane and chloroalkene degradation;Tyrosine metabolism;Pyruvate metabolism;Drug metabolism - cytochrome P450;Glycolysis / Gluconeogenesis;Biosynthesis of secondary metabolites;Retinol metabolism
MAG79_gene2208	M2_1_3_k97_960479_ORF2183	MAG79	d__Bacteria;p__Actinomycetota;c__Actinomycetia;o__Jiangellales;f__Unclassified;g__Unclassified;s__Unclassified	1334	2323	990	K00001	adh	alcohol dehydrogenase [EC:1.1.1.1]	Metabolism of xenobiotics by cytochrome P450;Naphthalene degradation;Metabolic pathways;Degradation of aromatic compounds;Microbial metabolism in diverse environments;Fatty acid degradation;Chloroalkane and chloroalkene degradation;Tyrosine metabolism;Pyruvate metabolism;Drug metabolism - cytochrome P450;Glycolysis / Gluconeogenesis;Biosynthesis of secondary metabolites;Retinol metabolism
MAG79_gene2287	M2_1_3_k97_1336368_ORF2260	MAG79	d__Bacteria;p__Actinomycetota;c__Actinomycetia;o__Jiangellales;f__Unclassified;g__Unclassified;s__Unclassified	670	2	669	K00001	adh	alcohol dehydrogenase [EC:1.1.1.1]	Metabolism of xenobiotics by cytochrome P450;Naphthalene degradation;Metabolic pathways;Degradation of aromatic compounds;Microbial metabolism in diverse environments;Fatty acid degradation;Chloroalkane and chloroalkene degradation;Tyrosine metabolism;Pyruvate metabolism;Drug metabolism - cytochrome P450;Glycolysis / Gluconeogenesis;Biosynthesis of secondary metabolites;Retinol metabolism
MAG79_gene2359	M2_1_3_k97_1560241_ORF2331	MAG79	d__Bacteria;p__Actinomycetota;c__Actinomycetia;o__Jiangellales;f__Unclassified;g__Unclassified;s__Unclassified	2186	1302	885	K00001	adh	alcohol dehydrogenase [EC:1.1.1.1]	Metabolism of xenobiotics by cytochrome P450;Naphthalene degradation;Metabolic pathways;Degradation of aromatic compounds;Microbial metabolism in diverse environments;Fatty acid degradation;Chloroalkane and chloroalkene degradation;Tyrosine metabolism;Pyruvate metabolism;Drug metabolism - cytochrome P450;Glycolysis / Gluconeogenesis;Biosynthesis of secondary metabolites;Retinol metabolism
MAG80_gene2822	M1_2_2_k97_130387_ORF2786	MAG80	d__Bacteria;p__Pseudomonadota;c__Alphaproteobacteria;o__Rhizobiales;f__Methyloligellaceae;g__Methyloceanibacter;s__Unclassified	380	3	378	K00001	adh	alcohol dehydrogenase [EC:1.1.1.1]	Metabolism of xenobiotics by cytochrome P450;Naphthalene degradation;Metabolic pathways;Degradation of aromatic compounds;Microbial metabolism in diverse environments;Fatty acid degradation;Chloroalkane and chloroalkene degradation;Tyrosine metabolism;Pyruvate metabolism;Drug metabolism - cytochrome P450;Glycolysis / Gluconeogenesis;Biosynthesis of secondary metabolites;Retinol metabolism
MAG83_gene1694	M1_2_3_k97_371410_ORF1684	MAG83	d__Bacteria;p__Pseudomonadota;c__Gammaproteobacteria;o__Arenicellales;f__JAANXG01;g__JAHEKE01;s__Unclassified	483	1472	990	K00001	adh	alcohol dehydrogenase [EC:1.1.1.1]	Metabolism of xenobiotics by cytochrome P450;Naphthalene degradation;Metabolic pathways;Degradation of aromatic compounds;Microbial metabolism in diverse environments;Fatty acid degradation;Chloroalkane and chloroalkene degradation;Tyrosine metabolism;Pyruvate metabolism;Drug metabolism - cytochrome P450;Glycolysis / Gluconeogenesis;Biosynthesis of secondary metabolites;Retinol metabolism
MAG83_gene1695	M1_2_3_k97_371410_ORF1685	MAG83	d__Bacteria;p__Pseudomonadota;c__Gammaproteobacteria;o__Arenicellales;f__JAANXG01;g__JAHEKE01;s__Unclassified	1492	2058	567	K00001	adh	alcohol dehydrogenase [EC:1.1.1.1]	Metabolism of xenobiotics by cytochrome P450;Naphthalene degradation;Metabolic pathways;Degradation of aromatic compounds;Microbial metabolism in diverse environments;Fatty acid degradation;Chloroalkane and chloroalkene degradation;Tyrosine metabolism;Pyruvate metabolism;Drug metabolism - cytochrome P450;Glycolysis / Gluconeogenesis;Biosynthesis of secondary metabolites;Retinol metabolism
MAG83_gene2464	M1_2_3_k97_89584_ORF2446	MAG83	d__Bacteria;p__Pseudomonadota;c__Gammaproteobacteria;o__Arenicellales;f__JAANXG01;g__JAHEKE01;s__Unclassified	151	2	150	K00001	adh	alcohol dehydrogenase [EC:1.1.1.1]	Metabolism of xenobiotics by cytochrome P450;Naphthalene degradation;Metabolic pathways;Degradation of aromatic compounds;Microbial metabolism in diverse environments;Fatty acid degradation;Chloroalkane and chloroalkene degradation;Tyrosine metabolism;Pyruvate metabolism;Drug metabolism - cytochrome P450;Glycolysis / Gluconeogenesis;Biosynthesis of secondary metabolites;Retinol metabolism
MAG83_gene2578	M1_2_3_k97_12686_ORF2558	MAG83	d__Bacteria;p__Pseudomonadota;c__Gammaproteobacteria;o__Arenicellales;f__JAANXG01;g__JAHEKE01;s__Unclassified	3	992	990	K00001	adh	alcohol dehydrogenase [EC:1.1.1.1]	Metabolism of xenobiotics by cytochrome P450;Naphthalene degradation;Metabolic pathways;Degradation of aromatic compounds;Microbial metabolism in diverse environments;Fatty acid degradation;Chloroalkane and chloroalkene degradation;Tyrosine metabolism;Pyruvate metabolism;Drug metabolism - cytochrome P450;Glycolysis / Gluconeogenesis;Biosynthesis of secondary metabolites;Retinol metabolism
MAG83_gene2679	M1_2_3_k97_242046_ORF2658	MAG83	d__Bacteria;p__Pseudomonadota;c__Gammaproteobacteria;o__Arenicellales;f__JAANXG01;g__JAHEKE01;s__Unclassified	2	316	315	K00001	adh	alcohol dehydrogenase [EC:1.1.1.1]	Metabolism of xenobiotics by cytochrome P450;Naphthalene degradation;Metabolic pathways;Degradation of aromatic compounds;Microbial metabolism in diverse environments;Fatty acid degradation;Chloroalkane and chloroalkene degradation;Tyrosine metabolism;Pyruvate metabolism;Drug metabolism - cytochrome P450;Glycolysis / Gluconeogenesis;Biosynthesis of secondary metabolites;Retinol metabolism
MAG83_gene2943	M1_2_3_k97_180887_ORF2921	MAG83	d__Bacteria;p__Pseudomonadota;c__Gammaproteobacteria;o__Arenicellales;f__JAANXG01;g__JAHEKE01;s__Unclassified	523	2	522	K00001	adh	alcohol dehydrogenase [EC:1.1.1.1]	Metabolism of xenobiotics by cytochrome P450;Naphthalene degradation;Metabolic pathways;Degradation of aromatic compounds;Microbial metabolism in diverse environments;Fatty acid degradation;Chloroalkane and chloroalkene degradation;Tyrosine metabolism;Pyruvate metabolism;Drug metabolism - cytochrome P450;Glycolysis / Gluconeogenesis;Biosynthesis of secondary metabolites;Retinol metabolism
MAG83_gene3389	M1_2_3_k97_313403_ORF3364	MAG83	d__Bacteria;p__Pseudomonadota;c__Gammaproteobacteria;o__Arenicellales;f__JAANXG01;g__JAHEKE01;s__Unclassified	2	370	369	K00001	adh	alcohol dehydrogenase [EC:1.1.1.1]	Metabolism of xenobiotics by cytochrome P450;Naphthalene degradation;Metabolic pathways;Degradation of aromatic compounds;Microbial metabolism in diverse environments;Fatty acid degradation;Chloroalkane and chloroalkene degradation;Tyrosine metabolism;Pyruvate metabolism;Drug metabolism - cytochrome P450;Glycolysis / Gluconeogenesis;Biosynthesis of secondary metabolites;Retinol metabolism
MAG83_gene4169	M1_2_3_k97_530331_ORF4140	MAG83	d__Bacteria;p__Pseudomonadota;c__Gammaproteobacteria;o__Arenicellales;f__JAANXG01;g__JAHEKE01;s__Unclassified	44	1090	1047	K00001	adh	alcohol dehydrogenase [EC:1.1.1.1]	Metabolism of xenobiotics by cytochrome P450;Naphthalene degradation;Metabolic pathways;Degradation of aromatic compounds;Microbial metabolism in diverse environments;Fatty acid degradation;Chloroalkane and chloroalkene degradation;Tyrosine metabolism;Pyruvate metabolism;Drug metabolism - cytochrome P450;Glycolysis / Gluconeogenesis;Biosynthesis of secondary metabolites;Retinol metabolism
MAG84_gene0986	CPT_LW_3_k97_383277_ORF981	MAG84	d__Bacteria;p__Chloroflexota;c__Anaerolineae;o__Anaerolineales;f__UBA4823;g__DSOS01;s__Unclassified	4459	5433	975	K00001	adh	alcohol dehydrogenase [EC:1.1.1.1]	Metabolism of xenobiotics by cytochrome P450;Naphthalene degradation;Metabolic pathways;Degradation of aromatic compounds;Microbial metabolism in diverse environments;Fatty acid degradation;Chloroalkane and chloroalkene degradation;Tyrosine metabolism;Pyruvate metabolism;Drug metabolism - cytochrome P450;Glycolysis / Gluconeogenesis;Biosynthesis of secondary metabolites;Retinol metabolism
MAG84_gene2339	CPT_LW_3_k97_878465_ORF2325	MAG84	d__Bacteria;p__Chloroflexota;c__Anaerolineae;o__Anaerolineales;f__UBA4823;g__DSOS01;s__Unclassified	4219	3269	951	K00001	adh	alcohol dehydrogenase [EC:1.1.1.1]	Metabolism of xenobiotics by cytochrome P450;Naphthalene degradation;Metabolic pathways;Degradation of aromatic compounds;Microbial metabolism in diverse environments;Fatty acid degradation;Chloroalkane and chloroalkene degradation;Tyrosine metabolism;Pyruvate metabolism;Drug metabolism - cytochrome P450;Glycolysis / Gluconeogenesis;Biosynthesis of secondary metabolites;Retinol metabolism
MAG84_gene4030	CPT_LW_3_k97_52304_ORF4005	MAG84	d__Bacteria;p__Chloroflexota;c__Anaerolineae;o__Anaerolineales;f__UBA4823;g__DSOS01;s__Unclassified	91	381	291	K00001	adh	alcohol dehydrogenase [EC:1.1.1.1]	Metabolism of xenobiotics by cytochrome P450;Naphthalene degradation;Metabolic pathways;Degradation of aromatic compounds;Microbial metabolism in diverse environments;Fatty acid degradation;Chloroalkane and chloroalkene degradation;Tyrosine metabolism;Pyruvate metabolism;Drug metabolism - cytochrome P450;Glycolysis / Gluconeogenesis;Biosynthesis of secondary metabolites;Retinol metabolism
MAG85_gene0080	M2_2_3_k97_248659_ORF79	MAG85	d__Bacteria;p__Desulfobacterota;c__Desulfobacteria;o__Desulfobacterales;f__SG8-13;g__Unclassified;s__Unclassified	19987	20985	999	K00001	adh	alcohol dehydrogenase [EC:1.1.1.1]	Metabolism of xenobiotics by cytochrome P450;Naphthalene degradation;Metabolic pathways;Degradation of aromatic compounds;Microbial metabolism in diverse environments;Fatty acid degradation;Chloroalkane and chloroalkene degradation;Tyrosine metabolism;Pyruvate metabolism;Drug metabolism - cytochrome P450;Glycolysis / Gluconeogenesis;Biosynthesis of secondary metabolites;Retinol metabolism
MAG85_gene1249	M2_2_3_k97_747511_ORF1242	MAG85	d__Bacteria;p__Desulfobacterota;c__Desulfobacteria;o__Desulfobacterales;f__SG8-13;g__Unclassified;s__Unclassified	5216	6256	1041	K00001	adh	alcohol dehydrogenase [EC:1.1.1.1]	Metabolism of xenobiotics by cytochrome P450;Naphthalene degradation;Metabolic pathways;Degradation of aromatic compounds;Microbial metabolism in diverse environments;Fatty acid degradation;Chloroalkane and chloroalkene degradation;Tyrosine metabolism;Pyruvate metabolism;Drug metabolism - cytochrome P450;Glycolysis / Gluconeogenesis;Biosynthesis of secondary metabolites;Retinol metabolism
MAG85_gene1912	M2_2_3_k97_2374829_ORF1900	MAG85	d__Bacteria;p__Desulfobacterota;c__Desulfobacteria;o__Desulfobacterales;f__SG8-13;g__Unclassified;s__Unclassified	4031	2985	1047	K00001	adh	alcohol dehydrogenase [EC:1.1.1.1]	Metabolism of xenobiotics by cytochrome P450;Naphthalene degradation;Metabolic pathways;Degradation of aromatic compounds;Microbial metabolism in diverse environments;Fatty acid degradation;Chloroalkane and chloroalkene degradation;Tyrosine metabolism;Pyruvate metabolism;Drug metabolism - cytochrome P450;Glycolysis / Gluconeogenesis;Biosynthesis of secondary metabolites;Retinol metabolism
MAG86_gene1418	M2_1_2_k97_536974_ORF1405	MAG86	d__Bacteria;p__Pseudomonadota;c__Gammaproteobacteria;o__Chromatiales;f__Sedimenticolaceae;g__Unclassified;s__Unclassified	1508	2476	969	K00001	adh	alcohol dehydrogenase [EC:1.1.1.1]	Metabolism of xenobiotics by cytochrome P450;Naphthalene degradation;Metabolic pathways;Degradation of aromatic compounds;Microbial metabolism in diverse environments;Fatty acid degradation;Chloroalkane and chloroalkene degradation;Tyrosine metabolism;Pyruvate metabolism;Drug metabolism - cytochrome P450;Glycolysis / Gluconeogenesis;Biosynthesis of secondary metabolites;Retinol metabolism
MAG89_gene0838	M2_2_1_k97_877195_ORF835	MAG89	d__Bacteria;p__Pseudomonadota;c__Alphaproteobacteria;o__Rhizobiales;f__Rhizobiaceae;g__Salaquimonas;s__Unclassified	4014	3502	513	K00001	adh	alcohol dehydrogenase [EC:1.1.1.1]	Metabolism of xenobiotics by cytochrome P450;Naphthalene degradation;Metabolic pathways;Degradation of aromatic compounds;Microbial metabolism in diverse environments;Fatty acid degradation;Chloroalkane and chloroalkene degradation;Tyrosine metabolism;Pyruvate metabolism;Drug metabolism - cytochrome P450;Glycolysis / Gluconeogenesis;Biosynthesis of secondary metabolites;Retinol metabolism
MAG89_gene1591	M2_2_1_k97_798874_ORF1586	MAG89	d__Bacteria;p__Pseudomonadota;c__Alphaproteobacteria;o__Rhizobiales;f__Rhizobiaceae;g__Salaquimonas;s__Unclassified	2568	1516	1053	K00001	adh	alcohol dehydrogenase [EC:1.1.1.1]	Metabolism of xenobiotics by cytochrome P450;Naphthalene degradation;Metabolic pathways;Degradation of aromatic compounds;Microbial metabolism in diverse environments;Fatty acid degradation;Chloroalkane and chloroalkene degradation;Tyrosine metabolism;Pyruvate metabolism;Drug metabolism - cytochrome P450;Glycolysis / Gluconeogenesis;Biosynthesis of secondary metabolites;Retinol metabolism
MAG90_gene0657	DY_1_k97_639940_ORF655	MAG90	d__Bacteria;p__Pseudomonadota;c__Gammaproteobacteria;o__Woeseiales;f__Woeseiaceae;g__JAACFE01;s__Unclassified	151	2	150	K00001	adh	alcohol dehydrogenase [EC:1.1.1.1]	Metabolism of xenobiotics by cytochrome P450;Naphthalene degradation;Metabolic pathways;Degradation of aromatic compounds;Microbial metabolism in diverse environments;Fatty acid degradation;Chloroalkane and chloroalkene degradation;Tyrosine metabolism;Pyruvate metabolism;Drug metabolism - cytochrome P450;Glycolysis / Gluconeogenesis;Biosynthesis of secondary metabolites;Retinol metabolism
MAG90_gene0683	DY_1_k97_910761_ORF681	MAG90	d__Bacteria;p__Pseudomonadota;c__Gammaproteobacteria;o__Woeseiales;f__Woeseiaceae;g__JAACFE01;s__Unclassified	3041	2055	987	K00001	adh	alcohol dehydrogenase [EC:1.1.1.1]	Metabolism of xenobiotics by cytochrome P450;Naphthalene degradation;Metabolic pathways;Degradation of aromatic compounds;Microbial metabolism in diverse environments;Fatty acid degradation;Chloroalkane and chloroalkene degradation;Tyrosine metabolism;Pyruvate metabolism;Drug metabolism - cytochrome P450;Glycolysis / Gluconeogenesis;Biosynthesis of secondary metabolites;Retinol metabolism
MAG91_gene2980	M1_2_1_k97_517661_ORF2955	MAG91	d__Bacteria;p__Pseudomonadota;c__Alphaproteobacteria;o__Rhodobacterales;f__Rhodobacteraceae;g__Unclassified;s__Unclassified	1	1095	1095	K00001	adh	alcohol dehydrogenase [EC:1.1.1.1]	Metabolism of xenobiotics by cytochrome P450;Naphthalene degradation;Metabolic pathways;Degradation of aromatic compounds;Microbial metabolism in diverse environments;Fatty acid degradation;Chloroalkane and chloroalkene degradation;Tyrosine metabolism;Pyruvate metabolism;Drug metabolism - cytochrome P450;Glycolysis / Gluconeogenesis;Biosynthesis of secondary metabolites;Retinol metabolism
MAG91_gene3052	M1_2_1_k97_428966_ORF3025	MAG91	d__Bacteria;p__Pseudomonadota;c__Alphaproteobacteria;o__Rhodobacterales;f__Rhodobacteraceae;g__Unclassified;s__Unclassified	1	966	966	K00001	adh	alcohol dehydrogenase [EC:1.1.1.1]	Metabolism of xenobiotics by cytochrome P450;Naphthalene degradation;Metabolic pathways;Degradation of aromatic compounds;Microbial metabolism in diverse environments;Fatty acid degradation;Chloroalkane and chloroalkene degradation;Tyrosine metabolism;Pyruvate metabolism;Drug metabolism - cytochrome P450;Glycolysis / Gluconeogenesis;Biosynthesis of secondary metabolites;Retinol metabolism
MAG92_gene1380	DY_1_k97_135190_ORF1373	MAG92	d__Bacteria;p__Bacteroidota;c__Bacteroidia;o__Flavobacteriales;f__Flavobacteriaceae;g__Robiginitalea;s__Robiginitalea sp006227965	2	1024	1023	K00001	adh	alcohol dehydrogenase [EC:1.1.1.1]	Metabolism of xenobiotics by cytochrome P450;Naphthalene degradation;Metabolic pathways;Degradation of aromatic compounds;Microbial metabolism in diverse environments;Fatty acid degradation;Chloroalkane and chloroalkene degradation;Tyrosine metabolism;Pyruvate metabolism;Drug metabolism - cytochrome P450;Glycolysis / Gluconeogenesis;Biosynthesis of secondary metabolites;Retinol metabolism
MAG92_gene1581	DY_1_k97_797496_ORF1574	MAG92	d__Bacteria;p__Bacteroidota;c__Bacteroidia;o__Flavobacteriales;f__Flavobacteriaceae;g__Robiginitalea;s__Robiginitalea sp006227965	603	1	603	K00001	adh	alcohol dehydrogenase [EC:1.1.1.1]	Metabolism of xenobiotics by cytochrome P450;Naphthalene degradation;Metabolic pathways;Degradation of aromatic compounds;Microbial metabolism in diverse environments;Fatty acid degradation;Chloroalkane and chloroalkene degradation;Tyrosine metabolism;Pyruvate metabolism;Drug metabolism - cytochrome P450;Glycolysis / Gluconeogenesis;Biosynthesis of secondary metabolites;Retinol metabolism
MAG93_gene0727	CPT_SW_2_k97_1179748_ORF719	MAG93	d__Bacteria;p__Pseudomonadota;c__Gammaproteobacteria;o__Acidiferrobacterales;f__SPGG2;g__SZUA-472;s__SZUA-472 sp003251795	2037	3209	1173	K00001	adh	alcohol dehydrogenase [EC:1.1.1.1]	Metabolism of xenobiotics by cytochrome P450;Naphthalene degradation;Metabolic pathways;Degradation of aromatic compounds;Microbial metabolism in diverse environments;Fatty acid degradation;Chloroalkane and chloroalkene degradation;Tyrosine metabolism;Pyruvate metabolism;Drug metabolism - cytochrome P450;Glycolysis / Gluconeogenesis;Biosynthesis of secondary metabolites;Retinol metabolism
MAG93_gene0879	CPT_SW_2_k97_226737_ORF870	MAG93	d__Bacteria;p__Pseudomonadota;c__Gammaproteobacteria;o__Acidiferrobacterales;f__SPGG2;g__SZUA-472;s__SZUA-472 sp003251795	2446	3171	726	K00001	adh	alcohol dehydrogenase [EC:1.1.1.1]	Metabolism of xenobiotics by cytochrome P450;Naphthalene degradation;Metabolic pathways;Degradation of aromatic compounds;Microbial metabolism in diverse environments;Fatty acid degradation;Chloroalkane and chloroalkene degradation;Tyrosine metabolism;Pyruvate metabolism;Drug metabolism - cytochrome P450;Glycolysis / Gluconeogenesis;Biosynthesis of secondary metabolites;Retinol metabolism
MAG94_gene1992	M1_1_1_k97_717423_ORF1970	MAG94	d__Bacteria;p__Pseudomonadota;c__Alphaproteobacteria;o__Rhizobiales;f__Methyloligellaceae;g__Methyloceanibacter;s__Unclassified	3281	4303	1023	K00001	adh	alcohol dehydrogenase [EC:1.1.1.1]	Metabolism of xenobiotics by cytochrome P450;Naphthalene degradation;Metabolic pathways;Degradation of aromatic compounds;Microbial metabolism in diverse environments;Fatty acid degradation;Chloroalkane and chloroalkene degradation;Tyrosine metabolism;Pyruvate metabolism;Drug metabolism - cytochrome P450;Glycolysis / Gluconeogenesis;Biosynthesis of secondary metabolites;Retinol metabolism
MAG94_gene3425	M1_1_1_k97_481613_ORF3388	MAG94	d__Bacteria;p__Pseudomonadota;c__Alphaproteobacteria;o__Rhizobiales;f__Methyloligellaceae;g__Methyloceanibacter;s__Unclassified	1275	274	1002	K00001	adh	alcohol dehydrogenase [EC:1.1.1.1]	Metabolism of xenobiotics by cytochrome P450;Naphthalene degradation;Metabolic pathways;Degradation of aromatic compounds;Microbial metabolism in diverse environments;Fatty acid degradation;Chloroalkane and chloroalkene degradation;Tyrosine metabolism;Pyruvate metabolism;Drug metabolism - cytochrome P450;Glycolysis / Gluconeogenesis;Biosynthesis of secondary metabolites;Retinol metabolism
MAG95_gene0560	FG_SC_1_k97_1159269_ORF553	MAG95	d__Bacteria;p__Chloroflexota;c__Anaerolineae;o__Promineofilales;f__Promineofilaceae;g__Unclassified;s__Unclassified	1485	2513	1029	K00001	adh	alcohol dehydrogenase [EC:1.1.1.1]	Metabolism of xenobiotics by cytochrome P450;Naphthalene degradation;Metabolic pathways;Degradation of aromatic compounds;Microbial metabolism in diverse environments;Fatty acid degradation;Chloroalkane and chloroalkene degradation;Tyrosine metabolism;Pyruvate metabolism;Drug metabolism - cytochrome P450;Glycolysis / Gluconeogenesis;Biosynthesis of secondary metabolites;Retinol metabolism
MAG95_gene2244	FG_SC_1_k97_1525623_ORF2233	MAG95	d__Bacteria;p__Chloroflexota;c__Anaerolineae;o__Promineofilales;f__Promineofilaceae;g__Unclassified;s__Unclassified	1549	380	1170	K00001	adh	alcohol dehydrogenase [EC:1.1.1.1]	Metabolism of xenobiotics by cytochrome P450;Naphthalene degradation;Metabolic pathways;Degradation of aromatic compounds;Microbial metabolism in diverse environments;Fatty acid degradation;Chloroalkane and chloroalkene degradation;Tyrosine metabolism;Pyruvate metabolism;Drug metabolism - cytochrome P450;Glycolysis / Gluconeogenesis;Biosynthesis of secondary metabolites;Retinol metabolism
MAG95_gene2940	FG_SC_1_k97_974573_ORF2920	MAG95	d__Bacteria;p__Chloroflexota;c__Anaerolineae;o__Promineofilales;f__Promineofilaceae;g__Unclassified;s__Unclassified	1116	2156	1041	K00001	adh	alcohol dehydrogenase [EC:1.1.1.1]	Metabolism of xenobiotics by cytochrome P450;Naphthalene degradation;Metabolic pathways;Degradation of aromatic compounds;Microbial metabolism in diverse environments;Fatty acid degradation;Chloroalkane and chloroalkene degradation;Tyrosine metabolism;Pyruvate metabolism;Drug metabolism - cytochrome P450;Glycolysis / Gluconeogenesis;Biosynthesis of secondary metabolites;Retinol metabolism
MAG95_gene2946	FG_SC_1_k97_1625598_ORF2926	MAG95	d__Bacteria;p__Chloroflexota;c__Anaerolineae;o__Promineofilales;f__Promineofilaceae;g__Unclassified;s__Unclassified	229	1251	1023	K00001	adh	alcohol dehydrogenase [EC:1.1.1.1]	Metabolism of xenobiotics by cytochrome P450;Naphthalene degradation;Metabolic pathways;Degradation of aromatic compounds;Microbial metabolism in diverse environments;Fatty acid degradation;Chloroalkane and chloroalkene degradation;Tyrosine metabolism;Pyruvate metabolism;Drug metabolism - cytochrome P450;Glycolysis / Gluconeogenesis;Biosynthesis of secondary metabolites;Retinol metabolism
MAG95_gene4847	FG_SC_1_k97_1086040_ORF4810	MAG95	d__Bacteria;p__Chloroflexota;c__Anaerolineae;o__Promineofilales;f__Promineofilaceae;g__Unclassified;s__Unclassified	71	1087	1017	K00001	adh	alcohol dehydrogenase [EC:1.1.1.1]	Metabolism of xenobiotics by cytochrome P450;Naphthalene degradation;Metabolic pathways;Degradation of aromatic compounds;Microbial metabolism in diverse environments;Fatty acid degradation;Chloroalkane and chloroalkene degradation;Tyrosine metabolism;Pyruvate metabolism;Drug metabolism - cytochrome P450;Glycolysis / Gluconeogenesis;Biosynthesis of secondary metabolites;Retinol metabolism
MAG95_gene5053	FG_SC_1_k97_806137_ORF5016	MAG95	d__Bacteria;p__Chloroflexota;c__Anaerolineae;o__Promineofilales;f__Promineofilaceae;g__Unclassified;s__Unclassified	1189	1692	504	K00001	adh	alcohol dehydrogenase [EC:1.1.1.1]	Metabolism of xenobiotics by cytochrome P450;Naphthalene degradation;Metabolic pathways;Degradation of aromatic compounds;Microbial metabolism in diverse environments;Fatty acid degradation;Chloroalkane and chloroalkene degradation;Tyrosine metabolism;Pyruvate metabolism;Drug metabolism - cytochrome P450;Glycolysis / Gluconeogenesis;Biosynthesis of secondary metabolites;Retinol metabolism
MAG96_gene0418	M2_2_2_k97_502262_ORF415	MAG96	d__Bacteria;p__Gemmatimonadota;c__Gemmatimonadetes;o__Longimicrobiales;f__UBA6960;g__JABDNZ01;s__Unclassified	7136	6084	1053	K00001	adh	alcohol dehydrogenase [EC:1.1.1.1]	Metabolism of xenobiotics by cytochrome P450;Naphthalene degradation;Metabolic pathways;Degradation of aromatic compounds;Microbial metabolism in diverse environments;Fatty acid degradation;Chloroalkane and chloroalkene degradation;Tyrosine metabolism;Pyruvate metabolism;Drug metabolism - cytochrome P450;Glycolysis / Gluconeogenesis;Biosynthesis of secondary metabolites;Retinol metabolism
MAG97_gene3530	M2_2_3_k97_1218795_ORF3509	MAG97	d__Bacteria;p__Desulfobacterota;c__Desulfobacteria;o__Desulfobacterales;f__B30-G6;g__Unclassified;s__Unclassified	1239	1877	639	K00001	adh	alcohol dehydrogenase [EC:1.1.1.1]	Metabolism of xenobiotics by cytochrome P450;Naphthalene degradation;Metabolic pathways;Degradation of aromatic compounds;Microbial metabolism in diverse environments;Fatty acid degradation;Chloroalkane and chloroalkene degradation;Tyrosine metabolism;Pyruvate metabolism;Drug metabolism - cytochrome P450;Glycolysis / Gluconeogenesis;Biosynthesis of secondary metabolites;Retinol metabolism
MAG98_gene0536	M2_2_1_k97_1784335_ORF528	MAG98	d__Bacteria;p__Pseudomonadota;c__Alphaproteobacteria;o__Rhizobiales;f__Methyloligellaceae;g__Methyloceanibacter;s__Unclassified	1311	847	465	K00001	adh	alcohol dehydrogenase [EC:1.1.1.1]	Metabolism of xenobiotics by cytochrome P450;Naphthalene degradation;Metabolic pathways;Degradation of aromatic compounds;Microbial metabolism in diverse environments;Fatty acid degradation;Chloroalkane and chloroalkene degradation;Tyrosine metabolism;Pyruvate metabolism;Drug metabolism - cytochrome P450;Glycolysis / Gluconeogenesis;Biosynthesis of secondary metabolites;Retinol metabolism
MAG98_gene0772	M2_2_1_k97_654428_ORF762	MAG98	d__Bacteria;p__Pseudomonadota;c__Alphaproteobacteria;o__Rhizobiales;f__Methyloligellaceae;g__Methyloceanibacter;s__Unclassified	1200	2210	1011	K00001	adh	alcohol dehydrogenase [EC:1.1.1.1]	Metabolism of xenobiotics by cytochrome P450;Naphthalene degradation;Metabolic pathways;Degradation of aromatic compounds;Microbial metabolism in diverse environments;Fatty acid degradation;Chloroalkane and chloroalkene degradation;Tyrosine metabolism;Pyruvate metabolism;Drug metabolism - cytochrome P450;Glycolysis / Gluconeogenesis;Biosynthesis of secondary metabolites;Retinol metabolism
MAG98_gene3590	M2_2_1_k97_625775_ORF3554	MAG98	d__Bacteria;p__Pseudomonadota;c__Alphaproteobacteria;o__Rhizobiales;f__Methyloligellaceae;g__Methyloceanibacter;s__Unclassified	1467	445	1023	K00001	adh	alcohol dehydrogenase [EC:1.1.1.1]	Metabolism of xenobiotics by cytochrome P450;Naphthalene degradation;Metabolic pathways;Degradation of aromatic compounds;Microbial metabolism in diverse environments;Fatty acid degradation;Chloroalkane and chloroalkene degradation;Tyrosine metabolism;Pyruvate metabolism;Drug metabolism - cytochrome P450;Glycolysis / Gluconeogenesis;Biosynthesis of secondary metabolites;Retinol metabolism
MAG99_gene2320	CPT_LW_3_k97_1008702_ORF2306	MAG99	d__Bacteria;p__Chloroflexota;c__Anaerolineae;o__Anaerolineales;f__UBA4823;g__PFL25;s__Unclassified	687	1	687	K00001	adh	alcohol dehydrogenase [EC:1.1.1.1]	Metabolism of xenobiotics by cytochrome P450;Naphthalene degradation;Metabolic pathways;Degradation of aromatic compounds;Microbial metabolism in diverse environments;Fatty acid degradation;Chloroalkane and chloroalkene degradation;Tyrosine metabolism;Pyruvate metabolism;Drug metabolism - cytochrome P450;Glycolysis / Gluconeogenesis;Biosynthesis of secondary metabolites;Retinol metabolism
MAG99_gene2321	CPT_LW_3_k97_1008702_ORF2307	MAG99	d__Bacteria;p__Chloroflexota;c__Anaerolineae;o__Anaerolineales;f__UBA4823;g__PFL25;s__Unclassified	1738	734	1005	K00001	adh	alcohol dehydrogenase [EC:1.1.1.1]	Metabolism of xenobiotics by cytochrome P450;Naphthalene degradation;Metabolic pathways;Degradation of aromatic compounds;Microbial metabolism in diverse environments;Fatty acid degradation;Chloroalkane and chloroalkene degradation;Tyrosine metabolism;Pyruvate metabolism;Drug metabolism - cytochrome P450;Glycolysis / Gluconeogenesis;Biosynthesis of secondary metabolites;Retinol metabolism
MAG99_gene2533	CPT_LW_3_k97_582185_ORF2515	MAG99	d__Bacteria;p__Chloroflexota;c__Anaerolineae;o__Anaerolineales;f__UBA4823;g__PFL25;s__Unclassified	1970	948	1023	K00001	adh	alcohol dehydrogenase [EC:1.1.1.1]	Metabolism of xenobiotics by cytochrome P450;Naphthalene degradation;Metabolic pathways;Degradation of aromatic compounds;Microbial metabolism in diverse environments;Fatty acid degradation;Chloroalkane and chloroalkene degradation;Tyrosine metabolism;Pyruvate metabolism;Drug metabolism - cytochrome P450;Glycolysis / Gluconeogenesis;Biosynthesis of secondary metabolites;Retinol metabolism
MAG103_gene0526	FG_WR_2_k97_580960_ORF525	MAG103	d__Bacteria;p__Bacteroidota;c__Bacteroidia;o__Bacteroidales;f__GCA-2748055;g__Unclassified;s__Unclassified	3333	2308	1026	K00002	adh	alcohol dehydrogenase (NADP+) [EC:1.1.1.2]	Pentose and glucuronate interconversions;Pyruvate metabolism;Chemical carcinogenesis - reactive oxygen species;Glycolysis / Gluconeogenesis;Ascorbate and aldarate metabolism;Biosynthesis of secondary metabolites;Metabolic pathways;Degradation of aromatic compounds;Caprolactam degradation;Microbial metabolism in diverse environments;Biosynthesis of cofactors;Glycerolipid metabolism
MAG103_gene3169	FG_WR_2_k97_586575_ORF3147	MAG103	d__Bacteria;p__Bacteroidota;c__Bacteroidia;o__Bacteroidales;f__GCA-2748055;g__Unclassified;s__Unclassified	1688	504	1185	K00002	adh	alcohol dehydrogenase (NADP+) [EC:1.1.1.2]	Pentose and glucuronate interconversions;Pyruvate metabolism;Chemical carcinogenesis - reactive oxygen species;Glycolysis / Gluconeogenesis;Ascorbate and aldarate metabolism;Biosynthesis of secondary metabolites;Metabolic pathways;Degradation of aromatic compounds;Caprolactam degradation;Microbial metabolism in diverse environments;Biosynthesis of cofactors;Glycerolipid metabolism
MAG119_gene2328	M3_2_1_k97_772119_ORF2303	MAG119	d__Bacteria;p__Bacteroidota;c__Bacteroidia;o__Flavobacteriales;f__Flavobacteriaceae;g__Lutimonas;s__Unclassified	1767	2393	627	K00002	adh	alcohol dehydrogenase (NADP+) [EC:1.1.1.2]	Pentose and glucuronate interconversions;Pyruvate metabolism;Chemical carcinogenesis - reactive oxygen species;Glycolysis / Gluconeogenesis;Ascorbate and aldarate metabolism;Biosynthesis of secondary metabolites;Metabolic pathways;Degradation of aromatic compounds;Caprolactam degradation;Microbial metabolism in diverse environments;Biosynthesis of cofactors;Glycerolipid metabolism
MAG146_gene0070	M2_1_3_k97_1787414_ORF70	MAG146	d__Bacteria;p__Bacteroidota;c__Bacteroidia;o__Flavobacteriales;f__Flavobacteriaceae;g__Lutimonas;s__Unclassified	3	890	888	K00002	adh	alcohol dehydrogenase (NADP+) [EC:1.1.1.2]	Pentose and glucuronate interconversions;Pyruvate metabolism;Chemical carcinogenesis - reactive oxygen species;Glycolysis / Gluconeogenesis;Ascorbate and aldarate metabolism;Biosynthesis of secondary metabolites;Metabolic pathways;Degradation of aromatic compounds;Caprolactam degradation;Microbial metabolism in diverse environments;Biosynthesis of cofactors;Glycerolipid metabolism
MAG210_gene0021	M3_1_3_k97_314648_ORF21	MAG210	d__Bacteria;p__Pseudomonadota;c__Gammaproteobacteria;o__XN24;f__XN24;g__Unclassified;s__Unclassified	3955	3005	951	K00002	adh	alcohol dehydrogenase (NADP+) [EC:1.1.1.2]	Pentose and glucuronate interconversions;Pyruvate metabolism;Chemical carcinogenesis - reactive oxygen species;Glycolysis / Gluconeogenesis;Ascorbate and aldarate metabolism;Biosynthesis of secondary metabolites;Metabolic pathways;Degradation of aromatic compounds;Caprolactam degradation;Microbial metabolism in diverse environments;Biosynthesis of cofactors;Glycerolipid metabolism
MAG239_gene5454	FG_SC_3_k97_516721_ORF5416	MAG239	d__Bacteria;p__Myxococcota;c__Polyangia;o__Haliangiales;f__Haliangiaceae;g__Unclassified;s__Unclassified	3377	2520	858	K00002	adh	alcohol dehydrogenase (NADP+) [EC:1.1.1.2]	Pentose and glucuronate interconversions;Pyruvate metabolism;Chemical carcinogenesis - reactive oxygen species;Glycolysis / Gluconeogenesis;Ascorbate and aldarate metabolism;Biosynthesis of secondary metabolites;Metabolic pathways;Degradation of aromatic compounds;Caprolactam degradation;Microbial metabolism in diverse environments;Biosynthesis of cofactors;Glycerolipid metabolism
MAG256_gene2572	M3_1_2_k97_1033032_ORF2553	MAG256	d__Bacteria;p__Pseudomonadota;c__Gammaproteobacteria;o__XN24;f__XN24;g__Unclassified;s__Unclassified	59	403	345	K00002	adh	alcohol dehydrogenase (NADP+) [EC:1.1.1.2]	Pentose and glucuronate interconversions;Pyruvate metabolism;Chemical carcinogenesis - reactive oxygen species;Glycolysis / Gluconeogenesis;Ascorbate and aldarate metabolism;Biosynthesis of secondary metabolites;Metabolic pathways;Degradation of aromatic compounds;Caprolactam degradation;Microbial metabolism in diverse environments;Biosynthesis of cofactors;Glycerolipid metabolism
MAG26_gene2495	M3_2_3_k97_92468_ORF2473	MAG26	d__Bacteria;p__Bacteroidota;c__Bacteroidia;o__Flavobacteriales;f__Flavobacteriaceae;g__Lutimonas;s__Unclassified	1115	165	951	K00002	adh	alcohol dehydrogenase (NADP+) [EC:1.1.1.2]	Pentose and glucuronate interconversions;Pyruvate metabolism;Chemical carcinogenesis - reactive oxygen species;Glycolysis / Gluconeogenesis;Ascorbate and aldarate metabolism;Biosynthesis of secondary metabolites;Metabolic pathways;Degradation of aromatic compounds;Caprolactam degradation;Microbial metabolism in diverse environments;Biosynthesis of cofactors;Glycerolipid metabolism
MAG26_gene2565	M3_2_3_k97_549448_ORF2541	MAG26	d__Bacteria;p__Bacteroidota;c__Bacteroidia;o__Flavobacteriales;f__Flavobacteriaceae;g__Lutimonas;s__Unclassified	1	270	270	K00002	adh	alcohol dehydrogenase (NADP+) [EC:1.1.1.2]	Pentose and glucuronate interconversions;Pyruvate metabolism;Chemical carcinogenesis - reactive oxygen species;Glycolysis / Gluconeogenesis;Ascorbate and aldarate metabolism;Biosynthesis of secondary metabolites;Metabolic pathways;Degradation of aromatic compounds;Caprolactam degradation;Microbial metabolism in diverse environments;Biosynthesis of cofactors;Glycerolipid metabolism
MAG38_gene1703	M3_1_1_k97_782808_ORF1687	MAG38	d__Bacteria;p__Bacteroidota;c__Bacteroidia;o__Flavobacteriales;f__Flavobacteriaceae;g__Lutimonas;s__Unclassified	3243	4193	951	K00002	adh	alcohol dehydrogenase (NADP+) [EC:1.1.1.2]	Pentose and glucuronate interconversions;Pyruvate metabolism;Chemical carcinogenesis - reactive oxygen species;Glycolysis / Gluconeogenesis;Ascorbate and aldarate metabolism;Biosynthesis of secondary metabolites;Metabolic pathways;Degradation of aromatic compounds;Caprolactam degradation;Microbial metabolism in diverse environments;Biosynthesis of cofactors;Glycerolipid metabolism
MAG51_gene0690	M3_1_1_k97_1022156_ORF688	MAG51	d__Bacteria;p__Pseudomonadota;c__Gammaproteobacteria;o__XN24;f__XN24;g__Unclassified;s__Unclassified	4842	5792	951	K00002	adh	alcohol dehydrogenase (NADP+) [EC:1.1.1.2]	Pentose and glucuronate interconversions;Pyruvate metabolism;Chemical carcinogenesis - reactive oxygen species;Glycolysis / Gluconeogenesis;Ascorbate and aldarate metabolism;Biosynthesis of secondary metabolites;Metabolic pathways;Degradation of aromatic compounds;Caprolactam degradation;Microbial metabolism in diverse environments;Biosynthesis of cofactors;Glycerolipid metabolism
MAG53_gene1285	M3_1_3_k97_724559_ORF1275	MAG53	d__Bacteria;p__Bacteroidota;c__Bacteroidia;o__Flavobacteriales;f__Flavobacteriaceae;g__Lutimonas;s__Unclassified	4921	5838	918	K00002	adh	alcohol dehydrogenase (NADP+) [EC:1.1.1.2]	Pentose and glucuronate interconversions;Pyruvate metabolism;Chemical carcinogenesis - reactive oxygen species;Glycolysis / Gluconeogenesis;Ascorbate and aldarate metabolism;Biosynthesis of secondary metabolites;Metabolic pathways;Degradation of aromatic compounds;Caprolactam degradation;Microbial metabolism in diverse environments;Biosynthesis of cofactors;Glycerolipid metabolism
MAG78_gene2623	M3_2_2_k97_1186466_ORF2597	MAG78	d__Bacteria;p__Bacteroidota;c__Bacteroidia;o__Flavobacteriales;f__Flavobacteriaceae;g__Lutimonas;s__Unclassified	1083	133	951	K00002	adh	alcohol dehydrogenase (NADP+) [EC:1.1.1.2]	Pentose and glucuronate interconversions;Pyruvate metabolism;Chemical carcinogenesis - reactive oxygen species;Glycolysis / Gluconeogenesis;Ascorbate and aldarate metabolism;Biosynthesis of secondary metabolites;Metabolic pathways;Degradation of aromatic compounds;Caprolactam degradation;Microbial metabolism in diverse environments;Biosynthesis of cofactors;Glycerolipid metabolism
MAG10_gene1698	M2_2_1_k97_79598_ORF1677	MAG10	d__Bacteria;p__Bacillota_A;c__Clostridia;o__DUPQ01;f__DUPQ01;g__JAFGQE01;s__Unclassified	158	3	156	K00018	hprA	glycerate dehydrogenase [EC:1.1.1.29]	Microbial metabolism in diverse environments;Methane metabolism;Biosynthesis of secondary metabolites;Glycine, serine and threonine metabolism;Carbon metabolism;Metabolic pathways;Glyoxylate and dicarboxylate metabolism
MAG102_gene2991	M2_2_2_k97_1308814_ORF2978	MAG102	d__Bacteria;p__Bacteroidota;c__Bacteroidia;o__Bacteroidales;f__Prolixibacteraceae;g__Draconibacterium;s__Unclassified	1326	1114	213	K00018	hprA	glycerate dehydrogenase [EC:1.1.1.29]	Microbial metabolism in diverse environments;Methane metabolism;Biosynthesis of secondary metabolites;Glycine, serine and threonine metabolism;Carbon metabolism;Metabolic pathways;Glyoxylate and dicarboxylate metabolism
MAG102_gene3598	M2_2_2_k97_249134_ORF3582	MAG102	d__Bacteria;p__Bacteroidota;c__Bacteroidia;o__Bacteroidales;f__Prolixibacteraceae;g__Draconibacterium;s__Unclassified	445	2	444	K00018	hprA	glycerate dehydrogenase [EC:1.1.1.29]	Microbial metabolism in diverse environments;Methane metabolism;Biosynthesis of secondary metabolites;Glycine, serine and threonine metabolism;Carbon metabolism;Metabolic pathways;Glyoxylate and dicarboxylate metabolism
MAG103_gene1232	FG_WR_2_k97_533513_ORF1226	MAG103	d__Bacteria;p__Bacteroidota;c__Bacteroidia;o__Bacteroidales;f__GCA-2748055;g__Unclassified;s__Unclassified	5076	6026	951	K00018	hprA	glycerate dehydrogenase [EC:1.1.1.29]	Microbial metabolism in diverse environments;Methane metabolism;Biosynthesis of secondary metabolites;Glycine, serine and threonine metabolism;Carbon metabolism;Metabolic pathways;Glyoxylate and dicarboxylate metabolism
MAG106_gene0961	FG_SC_2_k97_351323_ORF958	MAG106	d__Bacteria;p__Pseudomonadota;c__Gammaproteobacteria;o__Steroidobacterales;f__Steroidobacteraceae;g__SG8-30;s__Unclassified	2154	1201	954	K00018	hprA	glycerate dehydrogenase [EC:1.1.1.29]	Microbial metabolism in diverse environments;Methane metabolism;Biosynthesis of secondary metabolites;Glycine, serine and threonine metabolism;Carbon metabolism;Metabolic pathways;Glyoxylate and dicarboxylate metabolism
MAG108_gene1624	M1_1_1_k97_1073482_ORF1602	MAG108	d__Bacteria;p__Pseudomonadota;c__Alphaproteobacteria;o__Rhizobiales;f__Methyloligellaceae;g__Methyloceanibacter;s__Unclassified	4563	5366	804	K00018	hprA	glycerate dehydrogenase [EC:1.1.1.29]	Microbial metabolism in diverse environments;Methane metabolism;Biosynthesis of secondary metabolites;Glycine, serine and threonine metabolism;Carbon metabolism;Metabolic pathways;Glyoxylate and dicarboxylate metabolism
MAG112_gene2476	M2_2_3_k97_1342028_ORF2453	MAG112	d__Bacteria;p__Bacteroidota;c__Bacteroidia;o__Bacteroidales;f__GCA-2748055;g__GCA-2748055;s__Unclassified	1964	1002	963	K00018	hprA	glycerate dehydrogenase [EC:1.1.1.29]	Microbial metabolism in diverse environments;Methane metabolism;Biosynthesis of secondary metabolites;Glycine, serine and threonine metabolism;Carbon metabolism;Metabolic pathways;Glyoxylate and dicarboxylate metabolism
MAG115_gene0982	M3_1_3_k97_303302_ORF976	MAG115	d__Bacteria;p__Pseudomonadota;c__Gammaproteobacteria;o__UBA9214;f__UBA9214;g__Unclassified;s__Unclassified	8285	7332	954	K00018	hprA	glycerate dehydrogenase [EC:1.1.1.29]	Microbial metabolism in diverse environments;Methane metabolism;Biosynthesis of secondary metabolites;Glycine, serine and threonine metabolism;Carbon metabolism;Metabolic pathways;Glyoxylate and dicarboxylate metabolism
MAG118_gene1227	M1_1_3_k97_1038345_ORF1215	MAG118	d__Bacteria;p__Pseudomonadota;c__Alphaproteobacteria;o__Rhizobiales;f__Aestuariivirgaceae;g__Anderseniella;s__Unclassified	700	1656	957	K00018	hprA	glycerate dehydrogenase [EC:1.1.1.29]	Microbial metabolism in diverse environments;Methane metabolism;Biosynthesis of secondary metabolites;Glycine, serine and threonine metabolism;Carbon metabolism;Metabolic pathways;Glyoxylate and dicarboxylate metabolism
MAG120_gene3365	M1_1_3_k97_801812_ORF3317	MAG120	d__Bacteria;p__Pseudomonadota;c__Alphaproteobacteria;o__Rhizobiales;f__Methyloligellaceae;g__Methyloceanibacter;s__Unclassified	1954	1013	942	K00018	hprA	glycerate dehydrogenase [EC:1.1.1.29]	Microbial metabolism in diverse environments;Methane metabolism;Biosynthesis of secondary metabolites;Glycine, serine and threonine metabolism;Carbon metabolism;Metabolic pathways;Glyoxylate and dicarboxylate metabolism
MAG126_gene2025	M2_1_2_k97_276638_ORF2009	MAG126	d__Bacteria;p__Pseudomonadota;c__Alphaproteobacteria;o__Rhizobiales;f__Aestuariivirgaceae;g__Anderseniella;s__Unclassified	681	1	681	K00018	hprA	glycerate dehydrogenase [EC:1.1.1.29]	Microbial metabolism in diverse environments;Methane metabolism;Biosynthesis of secondary metabolites;Glycine, serine and threonine metabolism;Carbon metabolism;Metabolic pathways;Glyoxylate and dicarboxylate metabolism
MAG126_gene2480	M2_1_2_k97_1349685_ORF2462	MAG126	d__Bacteria;p__Pseudomonadota;c__Alphaproteobacteria;o__Rhizobiales;f__Aestuariivirgaceae;g__Anderseniella;s__Unclassified	306	1262	957	K00018	hprA	glycerate dehydrogenase [EC:1.1.1.29]	Microbial metabolism in diverse environments;Methane metabolism;Biosynthesis of secondary metabolites;Glycine, serine and threonine metabolism;Carbon metabolism;Metabolic pathways;Glyoxylate and dicarboxylate metabolism
MAG127_gene2012	M3_2_3_k97_380873_ORF1990	MAG127	d__Bacteria;p__Pseudomonadota;c__Gammaproteobacteria;o__Steroidobacterales;f__Steroidobacteraceae;g__Unclassified;s__Unclassified	1198	242	957	K00018	hprA	glycerate dehydrogenase [EC:1.1.1.29]	Microbial metabolism in diverse environments;Methane metabolism;Biosynthesis of secondary metabolites;Glycine, serine and threonine metabolism;Carbon metabolism;Metabolic pathways;Glyoxylate and dicarboxylate metabolism
MAG129_gene2020	M2_2_3_k97_2281062_ORF2010	MAG129	d__Bacteria;p__Pseudomonadota;c__Gammaproteobacteria;o__Woeseiales;f__Woeseiaceae;g__UBA1847;s__Unclassified	1598	1789	192	K00018	hprA	glycerate dehydrogenase [EC:1.1.1.29]	Microbial metabolism in diverse environments;Methane metabolism;Biosynthesis of secondary metabolites;Glycine, serine and threonine metabolism;Carbon metabolism;Metabolic pathways;Glyoxylate and dicarboxylate metabolism
MAG130_gene1649	FG_SC_1_k97_1112653_ORF1639	MAG130	d__Bacteria;p__Planctomycetota;c__Planctomycetia;o__Pirellulales;f__Pirellulaceae;g__JAGQPK01;s__Unclassified	4439	4074	366	K00018	hprA	glycerate dehydrogenase [EC:1.1.1.29]	Microbial metabolism in diverse environments;Methane metabolism;Biosynthesis of secondary metabolites;Glycine, serine and threonine metabolism;Carbon metabolism;Metabolic pathways;Glyoxylate and dicarboxylate metabolism
MAG130_gene2288	FG_SC_1_k97_1632818_ORF2274	MAG130	d__Bacteria;p__Planctomycetota;c__Planctomycetia;o__Pirellulales;f__Pirellulaceae;g__JAGQPK01;s__Unclassified	596	3	594	K00018	hprA	glycerate dehydrogenase [EC:1.1.1.29]	Microbial metabolism in diverse environments;Methane metabolism;Biosynthesis of secondary metabolites;Glycine, serine and threonine metabolism;Carbon metabolism;Metabolic pathways;Glyoxylate and dicarboxylate metabolism
MAG138_gene0556	M2_1_2_k97_128645_ORF548	MAG138	d__Bacteria;p__Pseudomonadota;c__Gammaproteobacteria;o__Arenicellales;f__BMS3Bbin11;g__BMS3Bbin11;s__Unclassified	2	406	405	K00018	hprA	glycerate dehydrogenase [EC:1.1.1.29]	Microbial metabolism in diverse environments;Methane metabolism;Biosynthesis of secondary metabolites;Glycine, serine and threonine metabolism;Carbon metabolism;Metabolic pathways;Glyoxylate and dicarboxylate metabolism
MAG14_gene0935	M3_1_2_k97_1245168_ORF929	MAG14	d__Bacteria;p__Pseudomonadota;c__Gammaproteobacteria;o__Steroidobacterales;f__Steroidobacteraceae;g__Unclassified;s__Unclassified	3192	2236	957	K00018	hprA	glycerate dehydrogenase [EC:1.1.1.29]	Microbial metabolism in diverse environments;Methane metabolism;Biosynthesis of secondary metabolites;Glycine, serine and threonine metabolism;Carbon metabolism;Metabolic pathways;Glyoxylate and dicarboxylate metabolism
MAG14_gene3012	M3_1_2_k97_1118796_ORF2989	MAG14	d__Bacteria;p__Pseudomonadota;c__Gammaproteobacteria;o__Steroidobacterales;f__Steroidobacteraceae;g__Unclassified;s__Unclassified	167	3	165	K00018	hprA	glycerate dehydrogenase [EC:1.1.1.29]	Microbial metabolism in diverse environments;Methane metabolism;Biosynthesis of secondary metabolites;Glycine, serine and threonine metabolism;Carbon metabolism;Metabolic pathways;Glyoxylate and dicarboxylate metabolism
MAG142_gene0996	CPT_SW_2_k97_36393_ORF989	MAG142	d__Bacteria;p__Pseudomonadota;c__Alphaproteobacteria;o__Rhizobiales;f__Methyloligellaceae;g__Methyloceanibacter;s__Unclassified	1830	892	939	K00018	hprA	glycerate dehydrogenase [EC:1.1.1.29]	Microbial metabolism in diverse environments;Methane metabolism;Biosynthesis of secondary metabolites;Glycine, serine and threonine metabolism;Carbon metabolism;Metabolic pathways;Glyoxylate and dicarboxylate metabolism
MAG151_gene1772	FG_WR_2_k97_507343_ORF1755	MAG151	d__Bacteria;p__Desulfobacterota_F;c__Desulfuromonadia;o__Desulfuromonadales;f__BM103;g__JAFDBW01;s__Unclassified	1597	644	954	K00018	hprA	glycerate dehydrogenase [EC:1.1.1.29]	Microbial metabolism in diverse environments;Methane metabolism;Biosynthesis of secondary metabolites;Glycine, serine and threonine metabolism;Carbon metabolism;Metabolic pathways;Glyoxylate and dicarboxylate metabolism
MAG153_gene2013	M2_2_3_k97_494038_ORF1996	MAG153	d__Bacteria;p__Pseudomonadota;c__Gammaproteobacteria;o__Chromatiales;f__Sedimenticolaceae;g__Unclassified;s__Unclassified	2031	1567	465	K00018	hprA	glycerate dehydrogenase [EC:1.1.1.29]	Microbial metabolism in diverse environments;Methane metabolism;Biosynthesis of secondary metabolites;Glycine, serine and threonine metabolism;Carbon metabolism;Metabolic pathways;Glyoxylate and dicarboxylate metabolism
MAG154_gene1433	M1_2_3_k97_245893_ORF1424	MAG154	d__Bacteria;p__Desulfobacterota;c__Desulfobulbia;o__Desulfobulbales;f__Desulfocapsaceae;g__JABDQA01;s__Unclassified	1146	2123	978	K00018	hprA	glycerate dehydrogenase [EC:1.1.1.29]	Microbial metabolism in diverse environments;Methane metabolism;Biosynthesis of secondary metabolites;Glycine, serine and threonine metabolism;Carbon metabolism;Metabolic pathways;Glyoxylate and dicarboxylate metabolism
MAG16_gene0258	CPT_SW_1_k97_141748_ORF249	MAG16	d__Bacteria;p__Pseudomonadota;c__Alphaproteobacteria;o__Rhizobiales;f__Methyloligellaceae;g__Methyloceanibacter;s__Unclassified	7253	6807	447	K00018	hprA	glycerate dehydrogenase [EC:1.1.1.29]	Microbial metabolism in diverse environments;Methane metabolism;Biosynthesis of secondary metabolites;Glycine, serine and threonine metabolism;Carbon metabolism;Metabolic pathways;Glyoxylate and dicarboxylate metabolism
MAG16_gene0823	CPT_SW_1_k97_732292_ORF807	MAG16	d__Bacteria;p__Pseudomonadota;c__Alphaproteobacteria;o__Rhizobiales;f__Methyloligellaceae;g__Methyloceanibacter;s__Unclassified	3681	4265	585	K00018	hprA	glycerate dehydrogenase [EC:1.1.1.29]	Microbial metabolism in diverse environments;Methane metabolism;Biosynthesis of secondary metabolites;Glycine, serine and threonine metabolism;Carbon metabolism;Metabolic pathways;Glyoxylate and dicarboxylate metabolism
MAG165_gene0449	M1_1_3_k97_474926_ORF445	MAG165	d__Bacteria;p__Pseudomonadota;c__Alphaproteobacteria;o__Rhizobiales;f__Methyloligellaceae;g__Methyloceanibacter;s__Unclassified	4074	5015	942	K00018	hprA	glycerate dehydrogenase [EC:1.1.1.29]	Microbial metabolism in diverse environments;Methane metabolism;Biosynthesis of secondary metabolites;Glycine, serine and threonine metabolism;Carbon metabolism;Metabolic pathways;Glyoxylate and dicarboxylate metabolism
MAG169_gene0900	M2_2_3_k97_1723753_ORF893	MAG169	d__Bacteria;p__Pseudomonadota;c__Alphaproteobacteria;o__Rhizobiales;f__Aestuariivirgaceae;g__Anderseniella;s__Unclassified	3260	2304	957	K00018	hprA	glycerate dehydrogenase [EC:1.1.1.29]	Microbial metabolism in diverse environments;Methane metabolism;Biosynthesis of secondary metabolites;Glycine, serine and threonine metabolism;Carbon metabolism;Metabolic pathways;Glyoxylate and dicarboxylate metabolism
MAG170_gene1370	M1_1_2_k97_443136_ORF1350	MAG170	d__Bacteria;p__Pseudomonadota;c__Alphaproteobacteria;o__Rhizobiales;f__Methyloligellaceae;g__Methyloceanibacter;s__Unclassified	1003	62	942	K00018	hprA	glycerate dehydrogenase [EC:1.1.1.29]	Microbial metabolism in diverse environments;Methane metabolism;Biosynthesis of secondary metabolites;Glycine, serine and threonine metabolism;Carbon metabolism;Metabolic pathways;Glyoxylate and dicarboxylate metabolism
MAG210_gene0262	M3_1_3_k97_539545_ORF259	MAG210	d__Bacteria;p__Pseudomonadota;c__Gammaproteobacteria;o__XN24;f__XN24;g__Unclassified;s__Unclassified	5369	6346	978	K00018	hprA	glycerate dehydrogenase [EC:1.1.1.29]	Microbial metabolism in diverse environments;Methane metabolism;Biosynthesis of secondary metabolites;Glycine, serine and threonine metabolism;Carbon metabolism;Metabolic pathways;Glyoxylate and dicarboxylate metabolism
MAG213_gene0035	DY_3_k97_493469_ORF35	MAG213	d__Bacteria;p__Pseudomonadota;c__Gammaproteobacteria;o__Woeseiales;f__Woeseiaceae;g__JAACFE01;s__Unclassified	2408	3361	954	K00018	hprA	glycerate dehydrogenase [EC:1.1.1.29]	Microbial metabolism in diverse environments;Methane metabolism;Biosynthesis of secondary metabolites;Glycine, serine and threonine metabolism;Carbon metabolism;Metabolic pathways;Glyoxylate and dicarboxylate metabolism
MAG215_gene0998	FG_WR_3_k97_685647_ORF991	MAG215	d__Bacteria;p__Bacteroidota;c__Bacteroidia;o__Chitinophagales;f__Saprospiraceae;g__Unclassified;s__Unclassified	2666	3622	957	K00018	hprA	glycerate dehydrogenase [EC:1.1.1.29]	Microbial metabolism in diverse environments;Methane metabolism;Biosynthesis of secondary metabolites;Glycine, serine and threonine metabolism;Carbon metabolism;Metabolic pathways;Glyoxylate and dicarboxylate metabolism
MAG22_gene0147	M3_2_3_k97_1282945_ORF147	MAG22	d__Bacteria;p__Pseudomonadota;c__Gammaproteobacteria;o__XN24;f__XN24;g__Unclassified;s__Unclassified	4307	4669	363	K00018	hprA	glycerate dehydrogenase [EC:1.1.1.29]	Microbial metabolism in diverse environments;Methane metabolism;Biosynthesis of secondary metabolites;Glycine, serine and threonine metabolism;Carbon metabolism;Metabolic pathways;Glyoxylate and dicarboxylate metabolism
MAG22_gene0148	M3_2_3_k97_1282945_ORF148	MAG22	d__Bacteria;p__Pseudomonadota;c__Gammaproteobacteria;o__XN24;f__XN24;g__Unclassified;s__Unclassified	4676	5284	609	K00018	hprA	glycerate dehydrogenase [EC:1.1.1.29]	Microbial metabolism in diverse environments;Methane metabolism;Biosynthesis of secondary metabolites;Glycine, serine and threonine metabolism;Carbon metabolism;Metabolic pathways;Glyoxylate and dicarboxylate metabolism
MAG220_gene0991	M2_1_1_k97_903447_ORF988	MAG220	d__Bacteria;p__Pseudomonadota;c__Gammaproteobacteria;o__Arenicellales;f__BMS3Bbin11;g__BMS3Bbin11;s__Unclassified	498	1460	963	K00018	hprA	glycerate dehydrogenase [EC:1.1.1.29]	Microbial metabolism in diverse environments;Methane metabolism;Biosynthesis of secondary metabolites;Glycine, serine and threonine metabolism;Carbon metabolism;Metabolic pathways;Glyoxylate and dicarboxylate metabolism
MAG221_gene2717	M2_1_2_k97_770383_ORF2708	MAG221	d__Bacteria;p__Desulfobacterota;c__Desulfobacteria;o__Desulfobacterales;f__B30-G6;g__Unclassified;s__Unclassified	822	1	822	K00018	hprA	glycerate dehydrogenase [EC:1.1.1.29]	Microbial metabolism in diverse environments;Methane metabolism;Biosynthesis of secondary metabolites;Glycine, serine and threonine metabolism;Carbon metabolism;Metabolic pathways;Glyoxylate and dicarboxylate metabolism
MAG230_gene1850	M3_1_1_k97_1151283_ORF1827	MAG230	d__Bacteria;p__Pseudomonadota;c__Gammaproteobacteria;o__Steroidobacterales;f__Steroidobacteraceae;g__Unclassified;s__Unclassified	3	266	264	K00018	hprA	glycerate dehydrogenase [EC:1.1.1.29]	Microbial metabolism in diverse environments;Methane metabolism;Biosynthesis of secondary metabolites;Glycine, serine and threonine metabolism;Carbon metabolism;Metabolic pathways;Glyoxylate and dicarboxylate metabolism
MAG241_gene0520	M1_2_2_k97_23668_ORF517	MAG241	d__Bacteria;p__Pseudomonadota;c__Gammaproteobacteria;o__XN24;f__XN24;g__JAHEFR01;s__Unclassified	832	2	831	K00018	hprA	glycerate dehydrogenase [EC:1.1.1.29]	Microbial metabolism in diverse environments;Methane metabolism;Biosynthesis of secondary metabolites;Glycine, serine and threonine metabolism;Carbon metabolism;Metabolic pathways;Glyoxylate and dicarboxylate metabolism
MAG241_gene1394	M1_2_2_k97_205064_ORF1380	MAG241	d__Bacteria;p__Pseudomonadota;c__Gammaproteobacteria;o__XN24;f__XN24;g__JAHEFR01;s__Unclassified	1668	712	957	K00018	hprA	glycerate dehydrogenase [EC:1.1.1.29]	Microbial metabolism in diverse environments;Methane metabolism;Biosynthesis of secondary metabolites;Glycine, serine and threonine metabolism;Carbon metabolism;Metabolic pathways;Glyoxylate and dicarboxylate metabolism
MAG249_gene1578	M1_2_1_k97_141251_ORF1553	MAG249	d__Bacteria;p__Pseudomonadota;c__Alphaproteobacteria;o__Rhizobiales;f__Methyloligellaceae;g__Methyloceanibacter;s__Unclassified	2687	1746	942	K00018	hprA	glycerate dehydrogenase [EC:1.1.1.29]	Microbial metabolism in diverse environments;Methane metabolism;Biosynthesis of secondary metabolites;Glycine, serine and threonine metabolism;Carbon metabolism;Metabolic pathways;Glyoxylate and dicarboxylate metabolism
MAG252_gene1816	M1_2_3_k97_473655_ORF1806	MAG252	d__Bacteria;p__Pseudomonadota;c__Gammaproteobacteria;o__Woeseiales;f__Woeseiaceae;g__UBA1847;s__Unclassified	777	1718	942	K00018	hprA	glycerate dehydrogenase [EC:1.1.1.29]	Microbial metabolism in diverse environments;Methane metabolism;Biosynthesis of secondary metabolites;Glycine, serine and threonine metabolism;Carbon metabolism;Metabolic pathways;Glyoxylate and dicarboxylate metabolism
MAG256_gene2752	M3_1_2_k97_1355121_ORF2732	MAG256	d__Bacteria;p__Pseudomonadota;c__Gammaproteobacteria;o__XN24;f__XN24;g__Unclassified;s__Unclassified	1144	320	825	K00018	hprA	glycerate dehydrogenase [EC:1.1.1.29]	Microbial metabolism in diverse environments;Methane metabolism;Biosynthesis of secondary metabolites;Glycine, serine and threonine metabolism;Carbon metabolism;Metabolic pathways;Glyoxylate and dicarboxylate metabolism
MAG259_gene0423	M2_1_1_k97_1719380_ORF416	MAG259	d__Bacteria;p__Pseudomonadota;c__Alphaproteobacteria;o__Rhizobiales;f__Methyloligellaceae;g__Methyloceanibacter;s__Unclassified	2713	1772	942	K00018	hprA	glycerate dehydrogenase [EC:1.1.1.29]	Microbial metabolism in diverse environments;Methane metabolism;Biosynthesis of secondary metabolites;Glycine, serine and threonine metabolism;Carbon metabolism;Metabolic pathways;Glyoxylate and dicarboxylate metabolism
MAG260_gene0380	M1_1_2_k97_318967_ORF379	MAG260	d__Bacteria;p__Pseudomonadota;c__Alphaproteobacteria;o__Rhizobiales;f__Methyloligellaceae;g__Methyloceanibacter;s__Unclassified	7787	8728	942	K00018	hprA	glycerate dehydrogenase [EC:1.1.1.29]	Microbial metabolism in diverse environments;Methane metabolism;Biosynthesis of secondary metabolites;Glycine, serine and threonine metabolism;Carbon metabolism;Metabolic pathways;Glyoxylate and dicarboxylate metabolism
MAG266_gene1163	M3_2_1_k97_765286_ORF1149	MAG266	d__Bacteria;p__Pseudomonadota;c__Gammaproteobacteria;o__Steroidobacterales;f__Steroidobacteraceae;g__Unclassified;s__Unclassified	3672	3526	147	K00018	hprA	glycerate dehydrogenase [EC:1.1.1.29]	Microbial metabolism in diverse environments;Methane metabolism;Biosynthesis of secondary metabolites;Glycine, serine and threonine metabolism;Carbon metabolism;Metabolic pathways;Glyoxylate and dicarboxylate metabolism
MAG266_gene1725	M3_2_1_k97_717412_ORF1709	MAG266	d__Bacteria;p__Pseudomonadota;c__Gammaproteobacteria;o__Steroidobacterales;f__Steroidobacteraceae;g__Unclassified;s__Unclassified	1	144	144	K00018	hprA	glycerate dehydrogenase [EC:1.1.1.29]	Microbial metabolism in diverse environments;Methane metabolism;Biosynthesis of secondary metabolites;Glycine, serine and threonine metabolism;Carbon metabolism;Metabolic pathways;Glyoxylate and dicarboxylate metabolism
MAG268_gene1700	M3_1_2_k97_723251_ORF1690	MAG268	d__Bacteria;p__Pseudomonadota;c__Gammaproteobacteria;o__UBA9214;f__UBA9214;g__UBA9214;s__Unclassified	1492	2445	954	K00018	hprA	glycerate dehydrogenase [EC:1.1.1.29]	Microbial metabolism in diverse environments;Methane metabolism;Biosynthesis of secondary metabolites;Glycine, serine and threonine metabolism;Carbon metabolism;Metabolic pathways;Glyoxylate and dicarboxylate metabolism
MAG270_gene1099	M1_2_1_k97_928738_ORF1092	MAG270	d__Bacteria;p__Pseudomonadota;c__Gammaproteobacteria;o__Competibacterales;f__Competibacteraceae;g__Unclassified;s__Unclassified	201	1217	1017	K00018	hprA	glycerate dehydrogenase [EC:1.1.1.29]	Microbial metabolism in diverse environments;Methane metabolism;Biosynthesis of secondary metabolites;Glycine, serine and threonine metabolism;Carbon metabolism;Metabolic pathways;Glyoxylate and dicarboxylate metabolism
MAG271_gene0543	DY_3_k97_193488_ORF536	MAG271	d__Bacteria;p__Pseudomonadota;c__Gammaproteobacteria;o__UBA9214;f__UBA9214;g__UBA9214;s__Unclassified	2760	3716	957	K00018	hprA	glycerate dehydrogenase [EC:1.1.1.29]	Microbial metabolism in diverse environments;Methane metabolism;Biosynthesis of secondary metabolites;Glycine, serine and threonine metabolism;Carbon metabolism;Metabolic pathways;Glyoxylate and dicarboxylate metabolism
MAG271_gene2239	DY_3_k97_400167_ORF2218	MAG271	d__Bacteria;p__Pseudomonadota;c__Gammaproteobacteria;o__UBA9214;f__UBA9214;g__UBA9214;s__Unclassified	1203	1838	636	K00018	hprA	glycerate dehydrogenase [EC:1.1.1.29]	Microbial metabolism in diverse environments;Methane metabolism;Biosynthesis of secondary metabolites;Glycine, serine and threonine metabolism;Carbon metabolism;Metabolic pathways;Glyoxylate and dicarboxylate metabolism
MAG273_gene2589	M3_2_3_k97_149748_ORF2562	MAG273	d__Bacteria;p__Pseudomonadota;c__Gammaproteobacteria;o__UBA9214;f__UBA9214;g__Unclassified;s__Unclassified	1460	2413	954	K00018	hprA	glycerate dehydrogenase [EC:1.1.1.29]	Microbial metabolism in diverse environments;Methane metabolism;Biosynthesis of secondary metabolites;Glycine, serine and threonine metabolism;Carbon metabolism;Metabolic pathways;Glyoxylate and dicarboxylate metabolism
MAG276_gene2835	M3_1_3_k97_701664_ORF2811	MAG276	d__Bacteria;p__Pseudomonadota;c__Gammaproteobacteria;o__Steroidobacterales;f__Steroidobacteraceae;g__Unclassified;s__Unclassified	1	942	942	K00018	hprA	glycerate dehydrogenase [EC:1.1.1.29]	Microbial metabolism in diverse environments;Methane metabolism;Biosynthesis of secondary metabolites;Glycine, serine and threonine metabolism;Carbon metabolism;Metabolic pathways;Glyoxylate and dicarboxylate metabolism
MAG279_gene1264	FG_WR_2_k97_115984_ORF1255	MAG279	d__Bacteria;p__Pseudomonadota;c__Gammaproteobacteria;o__Burkholderiales;f__Nitrosomonadaceae;g__Nitrosomonas;s__Nitrosomonas sp024235735	2109	2333	225	K00018	hprA	glycerate dehydrogenase [EC:1.1.1.29]	Microbial metabolism in diverse environments;Methane metabolism;Biosynthesis of secondary metabolites;Glycine, serine and threonine metabolism;Carbon metabolism;Metabolic pathways;Glyoxylate and dicarboxylate metabolism
MAG279_gene1419	FG_WR_2_k97_1092076_ORF1410	MAG279	d__Bacteria;p__Pseudomonadota;c__Gammaproteobacteria;o__Burkholderiales;f__Nitrosomonadaceae;g__Nitrosomonas;s__Nitrosomonas sp024235735	3	827	825	K00018	hprA	glycerate dehydrogenase [EC:1.1.1.29]	Microbial metabolism in diverse environments;Methane metabolism;Biosynthesis of secondary metabolites;Glycine, serine and threonine metabolism;Carbon metabolism;Metabolic pathways;Glyoxylate and dicarboxylate metabolism
MAG31_gene1264	FG_WR_1_k97_440671_ORF1258	MAG31	d__Bacteria;p__Bacteroidota;c__Bacteroidia;o__Chitinophagales;f__Saprospiraceae;g__Unclassified;s__Unclassified	1567	611	957	K00018	hprA	glycerate dehydrogenase [EC:1.1.1.29]	Microbial metabolism in diverse environments;Methane metabolism;Biosynthesis of secondary metabolites;Glycine, serine and threonine metabolism;Carbon metabolism;Metabolic pathways;Glyoxylate and dicarboxylate metabolism
MAG40_gene1180	M2_2_2_k97_1061917_ORF1168	MAG40	d__Bacteria;p__Pseudomonadota;c__Gammaproteobacteria;o__Woeseiales;f__Woeseiaceae;g__UBA1847;s__Unclassified	296	3	294	K00018	hprA	glycerate dehydrogenase [EC:1.1.1.29]	Microbial metabolism in diverse environments;Methane metabolism;Biosynthesis of secondary metabolites;Glycine, serine and threonine metabolism;Carbon metabolism;Metabolic pathways;Glyoxylate and dicarboxylate metabolism
MAG41_gene2150	M3_2_1_k97_682797_ORF2139	MAG41	d__Bacteria;p__Pseudomonadota;c__Gammaproteobacteria;o__UBA9214;f__UBA9214;g__Unclassified;s__Unclassified	3	422	420	K00018	hprA	glycerate dehydrogenase [EC:1.1.1.29]	Microbial metabolism in diverse environments;Methane metabolism;Biosynthesis of secondary metabolites;Glycine, serine and threonine metabolism;Carbon metabolism;Metabolic pathways;Glyoxylate and dicarboxylate metabolism
MAG49_gene0378	M2_2_1_k97_1768947_ORF372	MAG49	d__Bacteria;p__Pseudomonadota;c__Gammaproteobacteria;o__Chromatiales;f__Sedimenticolaceae;g__Unclassified;s__Unclassified	6788	7741	954	K00018	hprA	glycerate dehydrogenase [EC:1.1.1.29]	Microbial metabolism in diverse environments;Methane metabolism;Biosynthesis of secondary metabolites;Glycine, serine and threonine metabolism;Carbon metabolism;Metabolic pathways;Glyoxylate and dicarboxylate metabolism
MAG51_gene1784	M3_1_1_k97_707833_ORF1770	MAG51	d__Bacteria;p__Pseudomonadota;c__Gammaproteobacteria;o__XN24;f__XN24;g__Unclassified;s__Unclassified	1750	773	978	K00018	hprA	glycerate dehydrogenase [EC:1.1.1.29]	Microbial metabolism in diverse environments;Methane metabolism;Biosynthesis of secondary metabolites;Glycine, serine and threonine metabolism;Carbon metabolism;Metabolic pathways;Glyoxylate and dicarboxylate metabolism
MAG56_gene3455	M3_2_2_k97_783832_ORF3436	MAG56	d__Bacteria;p__Planctomycetota;c__Planctomycetia;o__Pirellulales;f__Pirellulaceae;g__JAGQPK01;s__Unclassified	2	1567	1566	K00018	hprA	glycerate dehydrogenase [EC:1.1.1.29]	Microbial metabolism in diverse environments;Methane metabolism;Biosynthesis of secondary metabolites;Glycine, serine and threonine metabolism;Carbon metabolism;Metabolic pathways;Glyoxylate and dicarboxylate metabolism
MAG61_gene1181	FG_WR_1_k97_851963_ORF1169	MAG61	d__Bacteria;p__Pseudomonadota;c__Gammaproteobacteria;o__Woeseiales;f__Woeseiaceae;g__JAACFE01;s__Unclassified	14136	14630	495	K00018	hprA	glycerate dehydrogenase [EC:1.1.1.29]	Microbial metabolism in diverse environments;Methane metabolism;Biosynthesis of secondary metabolites;Glycine, serine and threonine metabolism;Carbon metabolism;Metabolic pathways;Glyoxylate and dicarboxylate metabolism
MAG61_gene1362	FG_WR_1_k97_258416_ORF1349	MAG61	d__Bacteria;p__Pseudomonadota;c__Gammaproteobacteria;o__Woeseiales;f__Woeseiaceae;g__JAACFE01;s__Unclassified	13483	13070	414	K00018	hprA	glycerate dehydrogenase [EC:1.1.1.29]	Microbial metabolism in diverse environments;Methane metabolism;Biosynthesis of secondary metabolites;Glycine, serine and threonine metabolism;Carbon metabolism;Metabolic pathways;Glyoxylate and dicarboxylate metabolism
MAG65_gene0609	M2_2_3_k97_108637_ORF609	MAG65	d__Bacteria;p__Bacteroidota;c__Bacteroidia;o__Bacteroidales;f__Prolixibacteraceae;g__Draconibacterium;s__Unclassified	2137	1988	150	K00018	hprA	glycerate dehydrogenase [EC:1.1.1.29]	Microbial metabolism in diverse environments;Methane metabolism;Biosynthesis of secondary metabolites;Glycine, serine and threonine metabolism;Carbon metabolism;Metabolic pathways;Glyoxylate and dicarboxylate metabolism
MAG68_gene0169	FG_WR_2_k97_1544218_ORF168	MAG68	d__Bacteria;p__Bacteroidota;c__Bacteroidia;o__Chitinophagales;f__Saprospiraceae;g__Unclassified;s__Unclassified	14718	13762	957	K00018	hprA	glycerate dehydrogenase [EC:1.1.1.29]	Microbial metabolism in diverse environments;Methane metabolism;Biosynthesis of secondary metabolites;Glycine, serine and threonine metabolism;Carbon metabolism;Metabolic pathways;Glyoxylate and dicarboxylate metabolism
MAG80_gene2827	M1_2_2_k97_689570_ORF2791	MAG80	d__Bacteria;p__Pseudomonadota;c__Alphaproteobacteria;o__Rhizobiales;f__Methyloligellaceae;g__Methyloceanibacter;s__Unclassified	673	1614	942	K00018	hprA	glycerate dehydrogenase [EC:1.1.1.29]	Microbial metabolism in diverse environments;Methane metabolism;Biosynthesis of secondary metabolites;Glycine, serine and threonine metabolism;Carbon metabolism;Metabolic pathways;Glyoxylate and dicarboxylate metabolism
MAG90_gene0139	DY_1_k97_518840_ORF139	MAG90	d__Bacteria;p__Pseudomonadota;c__Gammaproteobacteria;o__Woeseiales;f__Woeseiaceae;g__JAACFE01;s__Unclassified	5675	4959	717	K00018	hprA	glycerate dehydrogenase [EC:1.1.1.29]	Microbial metabolism in diverse environments;Methane metabolism;Biosynthesis of secondary metabolites;Glycine, serine and threonine metabolism;Carbon metabolism;Metabolic pathways;Glyoxylate and dicarboxylate metabolism
MAG93_gene0718	CPT_SW_2_k97_250842_ORF710	MAG93	d__Bacteria;p__Pseudomonadota;c__Gammaproteobacteria;o__Acidiferrobacterales;f__SPGG2;g__SZUA-472;s__SZUA-472 sp003251795	1006	1980	975	K00018	hprA	glycerate dehydrogenase [EC:1.1.1.29]	Microbial metabolism in diverse environments;Methane metabolism;Biosynthesis of secondary metabolites;Glycine, serine and threonine metabolism;Carbon metabolism;Metabolic pathways;Glyoxylate and dicarboxylate metabolism
MAG94_gene2906	M1_1_1_k97_839428_ORF2872	MAG94	d__Bacteria;p__Pseudomonadota;c__Alphaproteobacteria;o__Rhizobiales;f__Methyloligellaceae;g__Methyloceanibacter;s__Unclassified	2	910	909	K00018	hprA	glycerate dehydrogenase [EC:1.1.1.29]	Microbial metabolism in diverse environments;Methane metabolism;Biosynthesis of secondary metabolites;Glycine, serine and threonine metabolism;Carbon metabolism;Metabolic pathways;Glyoxylate and dicarboxylate metabolism
MAG134_gene1077	CPT_LW_1_k97_1221082_ORF1063	MAG134	d__Bacteria;p__Actinomycetota;c__Actinomycetia;o__Mycobacteriales;f__Mycobacteriaceae;g__Mycobacterium;s__Unclassified	819	1682	864	K00022	-	3-hydroxyacyl-CoA dehydrogenase [EC:1.1.1.35]	Fatty acid metabolism;Microbial metabolism in diverse environments;Pinene, camphor and geraniol degradation;Fatty acid degradation;Metabolic pathways;Caprolactam degradation;Fatty acid elongation;Biosynthesis of secondary metabolites;Lysine degradation;Tryptophan metabolism;Butanoate metabolism;Valine, leucine and isoleucine degradation
MAG22_gene2758	M3_2_3_k97_1106517_ORF2736	MAG22	d__Bacteria;p__Pseudomonadota;c__Gammaproteobacteria;o__XN24;f__XN24;g__Unclassified;s__Unclassified	1082	180	903	K00022	-	3-hydroxyacyl-CoA dehydrogenase [EC:1.1.1.35]	Fatty acid metabolism;Microbial metabolism in diverse environments;Pinene, camphor and geraniol degradation;Fatty acid degradation;Metabolic pathways;Caprolactam degradation;Fatty acid elongation;Biosynthesis of secondary metabolites;Lysine degradation;Tryptophan metabolism;Butanoate metabolism;Valine, leucine and isoleucine degradation
MAG1_gene2525	M1_2_2_k97_166431_ORF2503	MAG1	d__Bacteria;p__Actinomycetota;c__Acidimicrobiia;o__UBA5794;f__ZC4RG35;g__SZUA-217;s__Unclassified	3494	4480	987	K00024	mdh	malate dehydrogenase [EC:1.1.1.37]	Carbon fixation in photosynthetic organisms;Biosynthesis of secondary metabolites;Carbon metabolism;Pyruvate metabolism;Methane metabolism;Microbial metabolism in diverse environments;Cysteine and methionine metabolism;Carbon fixation pathways in prokaryotes;Glyoxylate and dicarboxylate metabolism;Metabolic pathways;Citrate cycle (TCA cycle)
MAG100_gene0460	DY_1_k97_232508_ORF459	MAG100	d__Bacteria;p__Acidobacteriota;c__Vicinamibacteria;o__Vicinamibacterales;f__Unclassified;g__Unclassified;s__Unclassified	7616	8557	942	K00024	mdh	malate dehydrogenase [EC:1.1.1.37]	Carbon fixation in photosynthetic organisms;Biosynthesis of secondary metabolites;Carbon metabolism;Pyruvate metabolism;Methane metabolism;Microbial metabolism in diverse environments;Cysteine and methionine metabolism;Carbon fixation pathways in prokaryotes;Glyoxylate and dicarboxylate metabolism;Metabolic pathways;Citrate cycle (TCA cycle)
MAG101_gene2014	M2_2_1_k97_1427258_ORF1988	MAG101	d__Bacteria;p__Bacteroidota;c__Bacteroidia;o__Bacteroidales;f__VadinHA17;g__JAADHC01;s__Unclassified	6324	7259	936	K00024	mdh	malate dehydrogenase [EC:1.1.1.37]	Carbon fixation in photosynthetic organisms;Biosynthesis of secondary metabolites;Carbon metabolism;Pyruvate metabolism;Methane metabolism;Microbial metabolism in diverse environments;Cysteine and methionine metabolism;Carbon fixation pathways in prokaryotes;Glyoxylate and dicarboxylate metabolism;Metabolic pathways;Citrate cycle (TCA cycle)
MAG102_gene1856	M2_2_2_k97_944085_ORF1848	MAG102	d__Bacteria;p__Bacteroidota;c__Bacteroidia;o__Bacteroidales;f__Prolixibacteraceae;g__Draconibacterium;s__Unclassified	1889	1224	666	K00024	mdh	malate dehydrogenase [EC:1.1.1.37]	Carbon fixation in photosynthetic organisms;Biosynthesis of secondary metabolites;Carbon metabolism;Pyruvate metabolism;Methane metabolism;Microbial metabolism in diverse environments;Cysteine and methionine metabolism;Carbon fixation pathways in prokaryotes;Glyoxylate and dicarboxylate metabolism;Metabolic pathways;Citrate cycle (TCA cycle)
MAG102_gene2117	M2_2_2_k97_212280_ORF2109	MAG102	d__Bacteria;p__Bacteroidota;c__Bacteroidia;o__Bacteroidales;f__Prolixibacteraceae;g__Draconibacterium;s__Unclassified	274	2	273	K00024	mdh	malate dehydrogenase [EC:1.1.1.37]	Carbon fixation in photosynthetic organisms;Biosynthesis of secondary metabolites;Carbon metabolism;Pyruvate metabolism;Methane metabolism;Microbial metabolism in diverse environments;Cysteine and methionine metabolism;Carbon fixation pathways in prokaryotes;Glyoxylate and dicarboxylate metabolism;Metabolic pathways;Citrate cycle (TCA cycle)
MAG103_gene0599	FG_WR_2_k97_766267_ORF596	MAG103	d__Bacteria;p__Bacteroidota;c__Bacteroidia;o__Bacteroidales;f__GCA-2748055;g__Unclassified;s__Unclassified	9142	10077	936	K00024	mdh	malate dehydrogenase [EC:1.1.1.37]	Carbon fixation in photosynthetic organisms;Biosynthesis of secondary metabolites;Carbon metabolism;Pyruvate metabolism;Methane metabolism;Microbial metabolism in diverse environments;Cysteine and methionine metabolism;Carbon fixation pathways in prokaryotes;Glyoxylate and dicarboxylate metabolism;Metabolic pathways;Citrate cycle (TCA cycle)
MAG103_gene3276	FG_WR_2_k97_19871_ORF3254	MAG103	d__Bacteria;p__Bacteroidota;c__Bacteroidia;o__Bacteroidales;f__GCA-2748055;g__Unclassified;s__Unclassified	570	1	570	K00024	mdh	malate dehydrogenase [EC:1.1.1.37]	Carbon fixation in photosynthetic organisms;Biosynthesis of secondary metabolites;Carbon metabolism;Pyruvate metabolism;Methane metabolism;Microbial metabolism in diverse environments;Cysteine and methionine metabolism;Carbon fixation pathways in prokaryotes;Glyoxylate and dicarboxylate metabolism;Metabolic pathways;Citrate cycle (TCA cycle)
MAG105_gene1250	CPT_SW_3_k97_94048_ORF1241	MAG105	d__Bacteria;p__Actinomycetota;c__Acidimicrobiia;o__UBA5794;f__ZC4RG35;g__SZUA-217;s__Unclassified	1	669	669	K00024	mdh	malate dehydrogenase [EC:1.1.1.37]	Carbon fixation in photosynthetic organisms;Biosynthesis of secondary metabolites;Carbon metabolism;Pyruvate metabolism;Methane metabolism;Microbial metabolism in diverse environments;Cysteine and methionine metabolism;Carbon fixation pathways in prokaryotes;Glyoxylate and dicarboxylate metabolism;Metabolic pathways;Citrate cycle (TCA cycle)
MAG106_gene0162	FG_SC_2_k97_295271_ORF162	MAG106	d__Bacteria;p__Pseudomonadota;c__Gammaproteobacteria;o__Steroidobacterales;f__Steroidobacteraceae;g__SG8-30;s__Unclassified	6129	7106	978	K00024	mdh	malate dehydrogenase [EC:1.1.1.37]	Carbon fixation in photosynthetic organisms;Biosynthesis of secondary metabolites;Carbon metabolism;Pyruvate metabolism;Methane metabolism;Microbial metabolism in diverse environments;Cysteine and methionine metabolism;Carbon fixation pathways in prokaryotes;Glyoxylate and dicarboxylate metabolism;Metabolic pathways;Citrate cycle (TCA cycle)
MAG107_gene0668	M2_1_1_k97_188001_ORF666	MAG107	d__Bacteria;p__Desulfobacterota;c__Desulfobacteria;o__Desulfobacterales;f__B30-G6;g__Unclassified;s__Unclassified	1978	2910	933	K00024	mdh	malate dehydrogenase [EC:1.1.1.37]	Carbon fixation in photosynthetic organisms;Biosynthesis of secondary metabolites;Carbon metabolism;Pyruvate metabolism;Methane metabolism;Microbial metabolism in diverse environments;Cysteine and methionine metabolism;Carbon fixation pathways in prokaryotes;Glyoxylate and dicarboxylate metabolism;Metabolic pathways;Citrate cycle (TCA cycle)
MAG108_gene1522	M1_1_1_k97_768458_ORF1502	MAG108	d__Bacteria;p__Pseudomonadota;c__Alphaproteobacteria;o__Rhizobiales;f__Methyloligellaceae;g__Methyloceanibacter;s__Unclassified	1971	2939	969	K00024	mdh	malate dehydrogenase [EC:1.1.1.37]	Carbon fixation in photosynthetic organisms;Biosynthesis of secondary metabolites;Carbon metabolism;Pyruvate metabolism;Methane metabolism;Microbial metabolism in diverse environments;Cysteine and methionine metabolism;Carbon fixation pathways in prokaryotes;Glyoxylate and dicarboxylate metabolism;Metabolic pathways;Citrate cycle (TCA cycle)
MAG109_gene0213	CPT_LW_1_k97_364254_ORF212	MAG109	d__Bacteria;p__Chloroflexota;c__Anaerolineae;o__Anaerolineales;f__UBA4823;g__PFL25;s__Unclassified	209	3	207	K00024	mdh	malate dehydrogenase [EC:1.1.1.37]	Carbon fixation in photosynthetic organisms;Biosynthesis of secondary metabolites;Carbon metabolism;Pyruvate metabolism;Methane metabolism;Microbial metabolism in diverse environments;Cysteine and methionine metabolism;Carbon fixation pathways in prokaryotes;Glyoxylate and dicarboxylate metabolism;Metabolic pathways;Citrate cycle (TCA cycle)
MAG109_gene1809	CPT_LW_1_k97_1101799_ORF1801	MAG109	d__Bacteria;p__Chloroflexota;c__Anaerolineae;o__Anaerolineales;f__UBA4823;g__PFL25;s__Unclassified	4016	3393	624	K00024	mdh	malate dehydrogenase [EC:1.1.1.37]	Carbon fixation in photosynthetic organisms;Biosynthesis of secondary metabolites;Carbon metabolism;Pyruvate metabolism;Methane metabolism;Microbial metabolism in diverse environments;Cysteine and methionine metabolism;Carbon fixation pathways in prokaryotes;Glyoxylate and dicarboxylate metabolism;Metabolic pathways;Citrate cycle (TCA cycle)
MAG110_gene3258	M2_2_1_k97_459178_ORF3254	MAG110	d__Bacteria;p__Myxococcota;c__Polyangia;o__GCA-2747355;f__Unclassified;g__Unclassified;s__Unclassified	2055	1414	642	K00024	mdh	malate dehydrogenase [EC:1.1.1.37]	Carbon fixation in photosynthetic organisms;Biosynthesis of secondary metabolites;Carbon metabolism;Pyruvate metabolism;Methane metabolism;Microbial metabolism in diverse environments;Cysteine and methionine metabolism;Carbon fixation pathways in prokaryotes;Glyoxylate and dicarboxylate metabolism;Metabolic pathways;Citrate cycle (TCA cycle)
MAG111_gene0252	CPT_SW_2_k97_532181_ORF250	MAG111	d__Bacteria;p__Chloroflexota;c__Anaerolineae;o__Anaerolineales;f__UBA4823;g__PFL25;s__Unclassified	6032	6970	939	K00024	mdh	malate dehydrogenase [EC:1.1.1.37]	Carbon fixation in photosynthetic organisms;Biosynthesis of secondary metabolites;Carbon metabolism;Pyruvate metabolism;Methane metabolism;Microbial metabolism in diverse environments;Cysteine and methionine metabolism;Carbon fixation pathways in prokaryotes;Glyoxylate and dicarboxylate metabolism;Metabolic pathways;Citrate cycle (TCA cycle)
MAG112_gene0784	M2_2_3_k97_1724761_ORF777	MAG112	d__Bacteria;p__Bacteroidota;c__Bacteroidia;o__Bacteroidales;f__GCA-2748055;g__GCA-2748055;s__Unclassified	1693	2631	939	K00024	mdh	malate dehydrogenase [EC:1.1.1.37]	Carbon fixation in photosynthetic organisms;Biosynthesis of secondary metabolites;Carbon metabolism;Pyruvate metabolism;Methane metabolism;Microbial metabolism in diverse environments;Cysteine and methionine metabolism;Carbon fixation pathways in prokaryotes;Glyoxylate and dicarboxylate metabolism;Metabolic pathways;Citrate cycle (TCA cycle)
MAG113_gene0088	M2_1_1_k97_1048742_ORF88	MAG113	d__Bacteria;p__Pseudomonadota;c__Alphaproteobacteria;o__Rhizobiales;f__Rhizobiaceae;g__Salaquimonas;s__Unclassified	16997	17962	966	K00024	mdh	malate dehydrogenase [EC:1.1.1.37]	Carbon fixation in photosynthetic organisms;Biosynthesis of secondary metabolites;Carbon metabolism;Pyruvate metabolism;Methane metabolism;Microbial metabolism in diverse environments;Cysteine and methionine metabolism;Carbon fixation pathways in prokaryotes;Glyoxylate and dicarboxylate metabolism;Metabolic pathways;Citrate cycle (TCA cycle)
MAG115_gene2092	M3_1_3_k97_1250315_ORF2074	MAG115	d__Bacteria;p__Pseudomonadota;c__Gammaproteobacteria;o__UBA9214;f__UBA9214;g__Unclassified;s__Unclassified	373	2	372	K00024	mdh	malate dehydrogenase [EC:1.1.1.37]	Carbon fixation in photosynthetic organisms;Biosynthesis of secondary metabolites;Carbon metabolism;Pyruvate metabolism;Methane metabolism;Microbial metabolism in diverse environments;Cysteine and methionine metabolism;Carbon fixation pathways in prokaryotes;Glyoxylate and dicarboxylate metabolism;Metabolic pathways;Citrate cycle (TCA cycle)
MAG115_gene2341	M3_1_3_k97_1134805_ORF2323	MAG115	d__Bacteria;p__Pseudomonadota;c__Gammaproteobacteria;o__UBA9214;f__UBA9214;g__Unclassified;s__Unclassified	3	581	579	K00024	mdh	malate dehydrogenase [EC:1.1.1.37]	Carbon fixation in photosynthetic organisms;Biosynthesis of secondary metabolites;Carbon metabolism;Pyruvate metabolism;Methane metabolism;Microbial metabolism in diverse environments;Cysteine and methionine metabolism;Carbon fixation pathways in prokaryotes;Glyoxylate and dicarboxylate metabolism;Metabolic pathways;Citrate cycle (TCA cycle)
MAG116_gene2971	CPT_SW_3_k97_624733_ORF2956	MAG116	d__Bacteria;p__Pseudomonadota;c__Alphaproteobacteria;o__Rhizobiales;f__Rhizobiaceae;g__BOKV01;s__Unclassified	2640	2005	636	K00024	mdh	malate dehydrogenase [EC:1.1.1.37]	Carbon fixation in photosynthetic organisms;Biosynthesis of secondary metabolites;Carbon metabolism;Pyruvate metabolism;Methane metabolism;Microbial metabolism in diverse environments;Cysteine and methionine metabolism;Carbon fixation pathways in prokaryotes;Glyoxylate and dicarboxylate metabolism;Metabolic pathways;Citrate cycle (TCA cycle)
MAG118_gene0244	M1_1_3_k97_460063_ORF240	MAG118	d__Bacteria;p__Pseudomonadota;c__Alphaproteobacteria;o__Rhizobiales;f__Aestuariivirgaceae;g__Anderseniella;s__Unclassified	2984	2022	963	K00024	mdh	malate dehydrogenase [EC:1.1.1.37]	Carbon fixation in photosynthetic organisms;Biosynthesis of secondary metabolites;Carbon metabolism;Pyruvate metabolism;Methane metabolism;Microbial metabolism in diverse environments;Cysteine and methionine metabolism;Carbon fixation pathways in prokaryotes;Glyoxylate and dicarboxylate metabolism;Metabolic pathways;Citrate cycle (TCA cycle)
MAG119_gene2645	M3_2_1_k97_84135_ORF2619	MAG119	d__Bacteria;p__Bacteroidota;c__Bacteroidia;o__Flavobacteriales;f__Flavobacteriaceae;g__Lutimonas;s__Unclassified	1734	799	936	K00024	mdh	malate dehydrogenase [EC:1.1.1.37]	Carbon fixation in photosynthetic organisms;Biosynthesis of secondary metabolites;Carbon metabolism;Pyruvate metabolism;Methane metabolism;Microbial metabolism in diverse environments;Cysteine and methionine metabolism;Carbon fixation pathways in prokaryotes;Glyoxylate and dicarboxylate metabolism;Metabolic pathways;Citrate cycle (TCA cycle)
MAG12_gene2593	DY_3_k97_539791_ORF2568	MAG12	d__Bacteria;p__Actinomycetota;c__Acidimicrobiia;o__UBA5794;f__ZC4RG35;g__Unclassified;s__Unclassified	1159	2133	975	K00024	mdh	malate dehydrogenase [EC:1.1.1.37]	Carbon fixation in photosynthetic organisms;Biosynthesis of secondary metabolites;Carbon metabolism;Pyruvate metabolism;Methane metabolism;Microbial metabolism in diverse environments;Cysteine and methionine metabolism;Carbon fixation pathways in prokaryotes;Glyoxylate and dicarboxylate metabolism;Metabolic pathways;Citrate cycle (TCA cycle)
MAG120_gene1865	M1_1_3_k97_964391_ORF1836	MAG120	d__Bacteria;p__Pseudomonadota;c__Alphaproteobacteria;o__Rhizobiales;f__Methyloligellaceae;g__Methyloceanibacter;s__Unclassified	1218	250	969	K00024	mdh	malate dehydrogenase [EC:1.1.1.37]	Carbon fixation in photosynthetic organisms;Biosynthesis of secondary metabolites;Carbon metabolism;Pyruvate metabolism;Methane metabolism;Microbial metabolism in diverse environments;Cysteine and methionine metabolism;Carbon fixation pathways in prokaryotes;Glyoxylate and dicarboxylate metabolism;Metabolic pathways;Citrate cycle (TCA cycle)
MAG120_gene2914	M1_1_3_k97_1124998_ORF2871	MAG120	d__Bacteria;p__Pseudomonadota;c__Alphaproteobacteria;o__Rhizobiales;f__Methyloligellaceae;g__Methyloceanibacter;s__Unclassified	89	3	87	K00024	mdh	malate dehydrogenase [EC:1.1.1.37]	Carbon fixation in photosynthetic organisms;Biosynthesis of secondary metabolites;Carbon metabolism;Pyruvate metabolism;Methane metabolism;Microbial metabolism in diverse environments;Cysteine and methionine metabolism;Carbon fixation pathways in prokaryotes;Glyoxylate and dicarboxylate metabolism;Metabolic pathways;Citrate cycle (TCA cycle)
MAG121_gene3152	CPT_LW_3_k97_569603_ORF3141	MAG121	d__Bacteria;p__Chloroflexota;c__Anaerolineae;o__Promineofilales;f__Promineofilaceae;g__UBA11865;s__Unclassified	2	508	507	K00024	mdh	malate dehydrogenase [EC:1.1.1.37]	Carbon fixation in photosynthetic organisms;Biosynthesis of secondary metabolites;Carbon metabolism;Pyruvate metabolism;Methane metabolism;Microbial metabolism in diverse environments;Cysteine and methionine metabolism;Carbon fixation pathways in prokaryotes;Glyoxylate and dicarboxylate metabolism;Metabolic pathways;Citrate cycle (TCA cycle)
MAG122_gene0724	M2_1_1_k97_1848699_ORF718	MAG122	d__Bacteria;p__Actinomycetota;c__Actinomycetia;o__Actinomycetales;f__Dermatophilaceae;g__Phycicoccus;s__Unclassified	3234	2245	990	K00024	mdh	malate dehydrogenase [EC:1.1.1.37]	Carbon fixation in photosynthetic organisms;Biosynthesis of secondary metabolites;Carbon metabolism;Pyruvate metabolism;Methane metabolism;Microbial metabolism in diverse environments;Cysteine and methionine metabolism;Carbon fixation pathways in prokaryotes;Glyoxylate and dicarboxylate metabolism;Metabolic pathways;Citrate cycle (TCA cycle)
MAG124_gene3065	DY_1_k97_168063_ORF3041	MAG124	d__Bacteria;p__Chloroflexota;c__Anaerolineae;o__Anaerolineales;f__UBA4823;g__PFL25;s__PFL25 sp020349245	1728	2666	939	K00024	mdh	malate dehydrogenase [EC:1.1.1.37]	Carbon fixation in photosynthetic organisms;Biosynthesis of secondary metabolites;Carbon metabolism;Pyruvate metabolism;Methane metabolism;Microbial metabolism in diverse environments;Cysteine and methionine metabolism;Carbon fixation pathways in prokaryotes;Glyoxylate and dicarboxylate metabolism;Metabolic pathways;Citrate cycle (TCA cycle)
MAG126_gene0736	M2_1_2_k97_972236_ORF728	MAG126	d__Bacteria;p__Pseudomonadota;c__Alphaproteobacteria;o__Rhizobiales;f__Aestuariivirgaceae;g__Anderseniella;s__Unclassified	781	2	780	K00024	mdh	malate dehydrogenase [EC:1.1.1.37]	Carbon fixation in photosynthetic organisms;Biosynthesis of secondary metabolites;Carbon metabolism;Pyruvate metabolism;Methane metabolism;Microbial metabolism in diverse environments;Cysteine and methionine metabolism;Carbon fixation pathways in prokaryotes;Glyoxylate and dicarboxylate metabolism;Metabolic pathways;Citrate cycle (TCA cycle)
MAG126_gene2085	M2_1_2_k97_1585673_ORF2068	MAG126	d__Bacteria;p__Pseudomonadota;c__Alphaproteobacteria;o__Rhizobiales;f__Aestuariivirgaceae;g__Anderseniella;s__Unclassified	1	117	117	K00024	mdh	malate dehydrogenase [EC:1.1.1.37]	Carbon fixation in photosynthetic organisms;Biosynthesis of secondary metabolites;Carbon metabolism;Pyruvate metabolism;Methane metabolism;Microbial metabolism in diverse environments;Cysteine and methionine metabolism;Carbon fixation pathways in prokaryotes;Glyoxylate and dicarboxylate metabolism;Metabolic pathways;Citrate cycle (TCA cycle)
MAG126_gene2608	M2_1_2_k97_1334486_ORF2590	MAG126	d__Bacteria;p__Pseudomonadota;c__Alphaproteobacteria;o__Rhizobiales;f__Aestuariivirgaceae;g__Anderseniella;s__Unclassified	3	131	129	K00024	mdh	malate dehydrogenase [EC:1.1.1.37]	Carbon fixation in photosynthetic organisms;Biosynthesis of secondary metabolites;Carbon metabolism;Pyruvate metabolism;Methane metabolism;Microbial metabolism in diverse environments;Cysteine and methionine metabolism;Carbon fixation pathways in prokaryotes;Glyoxylate and dicarboxylate metabolism;Metabolic pathways;Citrate cycle (TCA cycle)
MAG127_gene1429	M3_2_3_k97_344453_ORF1415	MAG127	d__Bacteria;p__Pseudomonadota;c__Gammaproteobacteria;o__Steroidobacterales;f__Steroidobacteraceae;g__Unclassified;s__Unclassified	493	1470	978	K00024	mdh	malate dehydrogenase [EC:1.1.1.37]	Carbon fixation in photosynthetic organisms;Biosynthesis of secondary metabolites;Carbon metabolism;Pyruvate metabolism;Methane metabolism;Microbial metabolism in diverse environments;Cysteine and methionine metabolism;Carbon fixation pathways in prokaryotes;Glyoxylate and dicarboxylate metabolism;Metabolic pathways;Citrate cycle (TCA cycle)
MAG13_gene1032	DY_1_k97_14615_ORF1025	MAG13	d__Bacteria;p__Pseudomonadota;c__Gammaproteobacteria;o__Burkholderiales;f__Burkholderiaceae_B;g__G020354665;s__G020354665 sp020354665	13034	14020	987	K00024	mdh	malate dehydrogenase [EC:1.1.1.37]	Carbon fixation in photosynthetic organisms;Biosynthesis of secondary metabolites;Carbon metabolism;Pyruvate metabolism;Methane metabolism;Microbial metabolism in diverse environments;Cysteine and methionine metabolism;Carbon fixation pathways in prokaryotes;Glyoxylate and dicarboxylate metabolism;Metabolic pathways;Citrate cycle (TCA cycle)
MAG130_gene5031	FG_SC_1_k97_1345318_ORF5006	MAG130	d__Bacteria;p__Planctomycetota;c__Planctomycetia;o__Pirellulales;f__Pirellulaceae;g__JAGQPK01;s__Unclassified	1236	235	1002	K00024	mdh	malate dehydrogenase [EC:1.1.1.37]	Carbon fixation in photosynthetic organisms;Biosynthesis of secondary metabolites;Carbon metabolism;Pyruvate metabolism;Methane metabolism;Microbial metabolism in diverse environments;Cysteine and methionine metabolism;Carbon fixation pathways in prokaryotes;Glyoxylate and dicarboxylate metabolism;Metabolic pathways;Citrate cycle (TCA cycle)
MAG132_gene3402	CPT_MZ_2_k97_1169324_ORF3383	MAG132	d__Bacteria;p__Chloroflexota;c__Anaerolineae;o__Anaerolineales;f__UBA4823;g__DSOS01;s__Unclassified	3	470	468	K00024	mdh	malate dehydrogenase [EC:1.1.1.37]	Carbon fixation in photosynthetic organisms;Biosynthesis of secondary metabolites;Carbon metabolism;Pyruvate metabolism;Methane metabolism;Microbial metabolism in diverse environments;Cysteine and methionine metabolism;Carbon fixation pathways in prokaryotes;Glyoxylate and dicarboxylate metabolism;Metabolic pathways;Citrate cycle (TCA cycle)
MAG133_gene0802	M2_2_2_k97_571242_ORF795	MAG133	d__Bacteria;p__Pseudomonadota;c__Alphaproteobacteria;o__Rhizobiales;f__Aestuariivirgaceae;g__Anderseniella;s__Unclassified	2081	1119	963	K00024	mdh	malate dehydrogenase [EC:1.1.1.37]	Carbon fixation in photosynthetic organisms;Biosynthesis of secondary metabolites;Carbon metabolism;Pyruvate metabolism;Methane metabolism;Microbial metabolism in diverse environments;Cysteine and methionine metabolism;Carbon fixation pathways in prokaryotes;Glyoxylate and dicarboxylate metabolism;Metabolic pathways;Citrate cycle (TCA cycle)
MAG134_gene3616	CPT_LW_1_k97_1225633_ORF3597	MAG134	d__Bacteria;p__Actinomycetota;c__Actinomycetia;o__Mycobacteriales;f__Mycobacteriaceae;g__Mycobacterium;s__Unclassified	1193	753	441	K00024	mdh	malate dehydrogenase [EC:1.1.1.37]	Carbon fixation in photosynthetic organisms;Biosynthesis of secondary metabolites;Carbon metabolism;Pyruvate metabolism;Methane metabolism;Microbial metabolism in diverse environments;Cysteine and methionine metabolism;Carbon fixation pathways in prokaryotes;Glyoxylate and dicarboxylate metabolism;Metabolic pathways;Citrate cycle (TCA cycle)
MAG135_gene1247	CPT_LW_1_k97_835579_ORF1219	MAG135	d__Bacteria;p__Actinomycetota;c__Thermoleophilia;o__Solirubrobacterales;f__70-9;g__JAJKHV01;s__Unclassified	45	1031	987	K00024	mdh	malate dehydrogenase [EC:1.1.1.37]	Carbon fixation in photosynthetic organisms;Biosynthesis of secondary metabolites;Carbon metabolism;Pyruvate metabolism;Methane metabolism;Microbial metabolism in diverse environments;Cysteine and methionine metabolism;Carbon fixation pathways in prokaryotes;Glyoxylate and dicarboxylate metabolism;Metabolic pathways;Citrate cycle (TCA cycle)
MAG136_gene1401	FG_SC_2_k97_225563_ORF1395	MAG136	d__Bacteria;p__Actinomycetota;c__Acidimicrobiia;o__Acidimicrobiales;f__Ilumatobacteraceae;g__Ilumatobacter;s__Unclassified	1	657	657	K00024	mdh	malate dehydrogenase [EC:1.1.1.37]	Carbon fixation in photosynthetic organisms;Biosynthesis of secondary metabolites;Carbon metabolism;Pyruvate metabolism;Methane metabolism;Microbial metabolism in diverse environments;Cysteine and methionine metabolism;Carbon fixation pathways in prokaryotes;Glyoxylate and dicarboxylate metabolism;Metabolic pathways;Citrate cycle (TCA cycle)
MAG136_gene2533	FG_SC_2_k97_1022900_ORF2520	MAG136	d__Bacteria;p__Actinomycetota;c__Acidimicrobiia;o__Acidimicrobiales;f__Ilumatobacteraceae;g__Ilumatobacter;s__Unclassified	575	33	543	K00024	mdh	malate dehydrogenase [EC:1.1.1.37]	Carbon fixation in photosynthetic organisms;Biosynthesis of secondary metabolites;Carbon metabolism;Pyruvate metabolism;Methane metabolism;Microbial metabolism in diverse environments;Cysteine and methionine metabolism;Carbon fixation pathways in prokaryotes;Glyoxylate and dicarboxylate metabolism;Metabolic pathways;Citrate cycle (TCA cycle)
MAG139_gene0392	DY_3_k97_781959_ORF390	MAG139	d__Bacteria;p__Desulfobacterota;c__Desulfobacteria;o__Desulfobacterales;f__UBA11574;g__UBA11574;s__UBA11574 sp003486165	3800	4732	933	K00024	mdh	malate dehydrogenase [EC:1.1.1.37]	Carbon fixation in photosynthetic organisms;Biosynthesis of secondary metabolites;Carbon metabolism;Pyruvate metabolism;Methane metabolism;Microbial metabolism in diverse environments;Cysteine and methionine metabolism;Carbon fixation pathways in prokaryotes;Glyoxylate and dicarboxylate metabolism;Metabolic pathways;Citrate cycle (TCA cycle)
MAG14_gene0762	M3_1_2_k97_10286_ORF759	MAG14	d__Bacteria;p__Pseudomonadota;c__Gammaproteobacteria;o__Steroidobacterales;f__Steroidobacteraceae;g__Unclassified;s__Unclassified	880	1857	978	K00024	mdh	malate dehydrogenase [EC:1.1.1.37]	Carbon fixation in photosynthetic organisms;Biosynthesis of secondary metabolites;Carbon metabolism;Pyruvate metabolism;Methane metabolism;Microbial metabolism in diverse environments;Cysteine and methionine metabolism;Carbon fixation pathways in prokaryotes;Glyoxylate and dicarboxylate metabolism;Metabolic pathways;Citrate cycle (TCA cycle)
MAG14_gene1981	M3_1_2_k97_1154635_ORF1964	MAG14	d__Bacteria;p__Pseudomonadota;c__Gammaproteobacteria;o__Steroidobacterales;f__Steroidobacteraceae;g__Unclassified;s__Unclassified	1172	2149	978	K00024	mdh	malate dehydrogenase [EC:1.1.1.37]	Carbon fixation in photosynthetic organisms;Biosynthesis of secondary metabolites;Carbon metabolism;Pyruvate metabolism;Methane metabolism;Microbial metabolism in diverse environments;Cysteine and methionine metabolism;Carbon fixation pathways in prokaryotes;Glyoxylate and dicarboxylate metabolism;Metabolic pathways;Citrate cycle (TCA cycle)
MAG140_gene1036	DY_3_k97_294138_ORF1028	MAG140	d__Bacteria;p__Chloroflexota;c__Anaerolineae;o__Anaerolineales;f__UBA4823;g__PFL25;s__Unclassified	4218	5156	939	K00024	mdh	malate dehydrogenase [EC:1.1.1.37]	Carbon fixation in photosynthetic organisms;Biosynthesis of secondary metabolites;Carbon metabolism;Pyruvate metabolism;Methane metabolism;Microbial metabolism in diverse environments;Cysteine and methionine metabolism;Carbon fixation pathways in prokaryotes;Glyoxylate and dicarboxylate metabolism;Metabolic pathways;Citrate cycle (TCA cycle)
MAG141_gene2861	DY_1_k97_114464_ORF2836	MAG141	d__Bacteria;p__Actinomycetota;c__Acidimicrobiia;o__UBA5794;f__ZC4RG35;g__Unclassified;s__Unclassified	524	3	522	K00024	mdh	malate dehydrogenase [EC:1.1.1.37]	Carbon fixation in photosynthetic organisms;Biosynthesis of secondary metabolites;Carbon metabolism;Pyruvate metabolism;Methane metabolism;Microbial metabolism in diverse environments;Cysteine and methionine metabolism;Carbon fixation pathways in prokaryotes;Glyoxylate and dicarboxylate metabolism;Metabolic pathways;Citrate cycle (TCA cycle)
MAG142_gene0458	CPT_SW_2_k97_444312_ORF452	MAG142	d__Bacteria;p__Pseudomonadota;c__Alphaproteobacteria;o__Rhizobiales;f__Methyloligellaceae;g__Methyloceanibacter;s__Unclassified	2174	1206	969	K00024	mdh	malate dehydrogenase [EC:1.1.1.37]	Carbon fixation in photosynthetic organisms;Biosynthesis of secondary metabolites;Carbon metabolism;Pyruvate metabolism;Methane metabolism;Microbial metabolism in diverse environments;Cysteine and methionine metabolism;Carbon fixation pathways in prokaryotes;Glyoxylate and dicarboxylate metabolism;Metabolic pathways;Citrate cycle (TCA cycle)
MAG143_gene1325	CPT_MZ_2_k97_797744_ORF1314	MAG143	d__Archaea;p__Thermoproteota;c__Nitrososphaeria;o__Nitrososphaerales;f__Nitrosopumilaceae;g__JACEMX01;s__Unclassified	1	585	585	K00024	mdh	malate dehydrogenase [EC:1.1.1.37]	Carbon fixation in photosynthetic organisms;Biosynthesis of secondary metabolites;Carbon metabolism;Pyruvate metabolism;Methane metabolism;Microbial metabolism in diverse environments;Cysteine and methionine metabolism;Carbon fixation pathways in prokaryotes;Glyoxylate and dicarboxylate metabolism;Metabolic pathways;Citrate cycle (TCA cycle)
MAG146_gene0114	M2_1_3_k97_1076401_ORF114	MAG146	d__Bacteria;p__Bacteroidota;c__Bacteroidia;o__Flavobacteriales;f__Flavobacteriaceae;g__Lutimonas;s__Unclassified	3	161	159	K00024	mdh	malate dehydrogenase [EC:1.1.1.37]	Carbon fixation in photosynthetic organisms;Biosynthesis of secondary metabolites;Carbon metabolism;Pyruvate metabolism;Methane metabolism;Microbial metabolism in diverse environments;Cysteine and methionine metabolism;Carbon fixation pathways in prokaryotes;Glyoxylate and dicarboxylate metabolism;Metabolic pathways;Citrate cycle (TCA cycle)
MAG147_gene0205	FG_SC_3_k97_872906_ORF203	MAG147	d__Bacteria;p__Pseudomonadota;c__Gammaproteobacteria;o__Burkholderiales;f__Burkholderiaceae_A;g__JADJWR01;s__Unclassified	2798	1809	990	K00024	mdh	malate dehydrogenase [EC:1.1.1.37]	Carbon fixation in photosynthetic organisms;Biosynthesis of secondary metabolites;Carbon metabolism;Pyruvate metabolism;Methane metabolism;Microbial metabolism in diverse environments;Cysteine and methionine metabolism;Carbon fixation pathways in prokaryotes;Glyoxylate and dicarboxylate metabolism;Metabolic pathways;Citrate cycle (TCA cycle)
MAG148_gene3881	CPT_SW_3_k97_576327_ORF3853	MAG148	d__Bacteria;p__Chloroflexota;c__Anaerolineae;o__Anaerolineales;f__UBA4823;g__DSOS01;s__Unclassified	401	3	399	K00024	mdh	malate dehydrogenase [EC:1.1.1.37]	Carbon fixation in photosynthetic organisms;Biosynthesis of secondary metabolites;Carbon metabolism;Pyruvate metabolism;Methane metabolism;Microbial metabolism in diverse environments;Cysteine and methionine metabolism;Carbon fixation pathways in prokaryotes;Glyoxylate and dicarboxylate metabolism;Metabolic pathways;Citrate cycle (TCA cycle)
MAG149_gene0309	M1_1_1_k97_664718_ORF305	MAG149	d__Bacteria;p__Bacteroidota;c__Bacteroidia;o__Flavobacteriales;f__Flavobacteriaceae;g__Robiginitalea;s__Unclassified	7715	6789	927	K00024	mdh	malate dehydrogenase [EC:1.1.1.37]	Carbon fixation in photosynthetic organisms;Biosynthesis of secondary metabolites;Carbon metabolism;Pyruvate metabolism;Methane metabolism;Microbial metabolism in diverse environments;Cysteine and methionine metabolism;Carbon fixation pathways in prokaryotes;Glyoxylate and dicarboxylate metabolism;Metabolic pathways;Citrate cycle (TCA cycle)
MAG150_gene0765	DY_2_k97_589665_ORF760	MAG150	d__Bacteria;p__Actinomycetota;c__Acidimicrobiia;o__UBA5794;f__ZC4RG35;g__Unclassified;s__Unclassified	5557	6531	975	K00024	mdh	malate dehydrogenase [EC:1.1.1.37]	Carbon fixation in photosynthetic organisms;Biosynthesis of secondary metabolites;Carbon metabolism;Pyruvate metabolism;Methane metabolism;Microbial metabolism in diverse environments;Cysteine and methionine metabolism;Carbon fixation pathways in prokaryotes;Glyoxylate and dicarboxylate metabolism;Metabolic pathways;Citrate cycle (TCA cycle)
MAG151_gene0923	FG_WR_2_k97_603496_ORF910	MAG151	d__Bacteria;p__Desulfobacterota_F;c__Desulfuromonadia;o__Desulfuromonadales;f__BM103;g__JAFDBW01;s__Unclassified	295	1263	969	K00024	mdh	malate dehydrogenase [EC:1.1.1.37]	Carbon fixation in photosynthetic organisms;Biosynthesis of secondary metabolites;Carbon metabolism;Pyruvate metabolism;Methane metabolism;Microbial metabolism in diverse environments;Cysteine and methionine metabolism;Carbon fixation pathways in prokaryotes;Glyoxylate and dicarboxylate metabolism;Metabolic pathways;Citrate cycle (TCA cycle)
MAG152_gene1616	DY_3_k97_719215_ORF1603	MAG152	d__Bacteria;p__Bacteroidota;c__Bacteroidia;o__Flavobacteriales;f__Flavobacteriaceae;g__Robiginitalea;s__Unclassified	14228	15154	927	K00024	mdh	malate dehydrogenase [EC:1.1.1.37]	Carbon fixation in photosynthetic organisms;Biosynthesis of secondary metabolites;Carbon metabolism;Pyruvate metabolism;Methane metabolism;Microbial metabolism in diverse environments;Cysteine and methionine metabolism;Carbon fixation pathways in prokaryotes;Glyoxylate and dicarboxylate metabolism;Metabolic pathways;Citrate cycle (TCA cycle)
MAG153_gene1627	M2_2_3_k97_1782953_ORF1616	MAG153	d__Bacteria;p__Pseudomonadota;c__Gammaproteobacteria;o__Chromatiales;f__Sedimenticolaceae;g__Unclassified;s__Unclassified	822	1808	987	K00024	mdh	malate dehydrogenase [EC:1.1.1.37]	Carbon fixation in photosynthetic organisms;Biosynthesis of secondary metabolites;Carbon metabolism;Pyruvate metabolism;Methane metabolism;Microbial metabolism in diverse environments;Cysteine and methionine metabolism;Carbon fixation pathways in prokaryotes;Glyoxylate and dicarboxylate metabolism;Metabolic pathways;Citrate cycle (TCA cycle)
MAG154_gene0328	M1_2_3_k97_386008_ORF328	MAG154	d__Bacteria;p__Desulfobacterota;c__Desulfobulbia;o__Desulfobulbales;f__Desulfocapsaceae;g__JABDQA01;s__Unclassified	4017	3727	291	K00024	mdh	malate dehydrogenase [EC:1.1.1.37]	Carbon fixation in photosynthetic organisms;Biosynthesis of secondary metabolites;Carbon metabolism;Pyruvate metabolism;Methane metabolism;Microbial metabolism in diverse environments;Cysteine and methionine metabolism;Carbon fixation pathways in prokaryotes;Glyoxylate and dicarboxylate metabolism;Metabolic pathways;Citrate cycle (TCA cycle)
MAG155_gene0660	CPT_SW_1_k97_325992_ORF655	MAG155	d__Archaea;p__Thermoproteota;c__Nitrososphaeria;o__Nitrososphaerales;f__Nitrososphaeraceae;g__TH1177;s__Unclassified	2160	1210	951	K00024	mdh	malate dehydrogenase [EC:1.1.1.37]	Carbon fixation in photosynthetic organisms;Biosynthesis of secondary metabolites;Carbon metabolism;Pyruvate metabolism;Methane metabolism;Microbial metabolism in diverse environments;Cysteine and methionine metabolism;Carbon fixation pathways in prokaryotes;Glyoxylate and dicarboxylate metabolism;Metabolic pathways;Citrate cycle (TCA cycle)
MAG157_gene1097	M2_1_1_k97_669709_ORF1082	MAG157	d__Bacteria;p__Actinomycetota;c__Actinomycetia;o__Jiangellales;f__Unclassified;g__Unclassified;s__Unclassified	1691	732	960	K00024	mdh	malate dehydrogenase [EC:1.1.1.37]	Carbon fixation in photosynthetic organisms;Biosynthesis of secondary metabolites;Carbon metabolism;Pyruvate metabolism;Methane metabolism;Microbial metabolism in diverse environments;Cysteine and methionine metabolism;Carbon fixation pathways in prokaryotes;Glyoxylate and dicarboxylate metabolism;Metabolic pathways;Citrate cycle (TCA cycle)
MAG158_gene0459	FG_WR_1_k97_1325939_ORF452	MAG158	d__Archaea;p__Halobacteriota;c__Methanosarcinia;o__Methanosarcinales;f__Methanosarcinaceae;g__Methanosarcina;s__Unclassified	6240	6356	117	K00024	mdh	malate dehydrogenase [EC:1.1.1.37]	Carbon fixation in photosynthetic organisms;Biosynthesis of secondary metabolites;Carbon metabolism;Pyruvate metabolism;Methane metabolism;Microbial metabolism in diverse environments;Cysteine and methionine metabolism;Carbon fixation pathways in prokaryotes;Glyoxylate and dicarboxylate metabolism;Metabolic pathways;Citrate cycle (TCA cycle)
MAG158_gene1495	FG_WR_1_k97_352394_ORF1480	MAG158	d__Archaea;p__Halobacteriota;c__Methanosarcinia;o__Methanosarcinales;f__Methanosarcinaceae;g__Methanosarcina;s__Unclassified	2852	2106	747	K00024	mdh	malate dehydrogenase [EC:1.1.1.37]	Carbon fixation in photosynthetic organisms;Biosynthesis of secondary metabolites;Carbon metabolism;Pyruvate metabolism;Methane metabolism;Microbial metabolism in diverse environments;Cysteine and methionine metabolism;Carbon fixation pathways in prokaryotes;Glyoxylate and dicarboxylate metabolism;Metabolic pathways;Citrate cycle (TCA cycle)
MAG159_gene0081	M3_2_3_k97_496345_ORF81	MAG159	d__Bacteria;p__Actinomycetota;c__Actinomycetia;o__Nanopelagicales;f__CAIYMF01;g__Unclassified;s__Unclassified	31988	32947	960	K00024	mdh	malate dehydrogenase [EC:1.1.1.37]	Carbon fixation in photosynthetic organisms;Biosynthesis of secondary metabolites;Carbon metabolism;Pyruvate metabolism;Methane metabolism;Microbial metabolism in diverse environments;Cysteine and methionine metabolism;Carbon fixation pathways in prokaryotes;Glyoxylate and dicarboxylate metabolism;Metabolic pathways;Citrate cycle (TCA cycle)
MAG16_gene1810	CPT_SW_1_k97_454697_ORF1786	MAG16	d__Bacteria;p__Pseudomonadota;c__Alphaproteobacteria;o__Rhizobiales;f__Methyloligellaceae;g__Methyloceanibacter;s__Unclassified	1787	819	969	K00024	mdh	malate dehydrogenase [EC:1.1.1.37]	Carbon fixation in photosynthetic organisms;Biosynthesis of secondary metabolites;Carbon metabolism;Pyruvate metabolism;Methane metabolism;Microbial metabolism in diverse environments;Cysteine and methionine metabolism;Carbon fixation pathways in prokaryotes;Glyoxylate and dicarboxylate metabolism;Metabolic pathways;Citrate cycle (TCA cycle)
MAG162_gene0744	M3_1_1_k97_844645_ORF737	MAG162	d__Bacteria;p__Actinomycetota;c__Acidimicrobiia;o__Acidimicrobiales;f__Ilumatobacteraceae;g__Ilumatobacter;s__Unclassified	1981	2967	987	K00024	mdh	malate dehydrogenase [EC:1.1.1.37]	Carbon fixation in photosynthetic organisms;Biosynthesis of secondary metabolites;Carbon metabolism;Pyruvate metabolism;Methane metabolism;Microbial metabolism in diverse environments;Cysteine and methionine metabolism;Carbon fixation pathways in prokaryotes;Glyoxylate and dicarboxylate metabolism;Metabolic pathways;Citrate cycle (TCA cycle)
MAG163_gene1186	CPT_MZ_1_k97_250119_ORF1178	MAG163	d__Bacteria;p__Chloroflexota;c__Anaerolineae;o__Anaerolineales;f__UBA4823;g__DSOS01;s__Unclassified	3837	2911	927	K00024	mdh	malate dehydrogenase [EC:1.1.1.37]	Carbon fixation in photosynthetic organisms;Biosynthesis of secondary metabolites;Carbon metabolism;Pyruvate metabolism;Methane metabolism;Microbial metabolism in diverse environments;Cysteine and methionine metabolism;Carbon fixation pathways in prokaryotes;Glyoxylate and dicarboxylate metabolism;Metabolic pathways;Citrate cycle (TCA cycle)
MAG164_gene1030	DY_3_k97_641596_ORF1015	MAG164	d__Bacteria;p__Chloroflexota;c__Anaerolineae;o__Anaerolineales;f__UBA4823;g__PFL25;s__PFL25 sp020349245	1516	578	939	K00024	mdh	malate dehydrogenase [EC:1.1.1.37]	Carbon fixation in photosynthetic organisms;Biosynthesis of secondary metabolites;Carbon metabolism;Pyruvate metabolism;Methane metabolism;Microbial metabolism in diverse environments;Cysteine and methionine metabolism;Carbon fixation pathways in prokaryotes;Glyoxylate and dicarboxylate metabolism;Metabolic pathways;Citrate cycle (TCA cycle)
MAG165_gene1855	M1_1_3_k97_94536_ORF1829	MAG165	d__Bacteria;p__Pseudomonadota;c__Alphaproteobacteria;o__Rhizobiales;f__Methyloligellaceae;g__Methyloceanibacter;s__Unclassified	3342	2374	969	K00024	mdh	malate dehydrogenase [EC:1.1.1.37]	Carbon fixation in photosynthetic organisms;Biosynthesis of secondary metabolites;Carbon metabolism;Pyruvate metabolism;Methane metabolism;Microbial metabolism in diverse environments;Cysteine and methionine metabolism;Carbon fixation pathways in prokaryotes;Glyoxylate and dicarboxylate metabolism;Metabolic pathways;Citrate cycle (TCA cycle)
MAG166_gene1394	FG_SC_1_k97_822754_ORF1379	MAG166	d__Bacteria;p__Chloroflexota;c__Anaerolineae;o__Anaerolineales;f__DRKV01;g__JAGUYX01;s__Unclassified	3356	2436	921	K00024	mdh	malate dehydrogenase [EC:1.1.1.37]	Carbon fixation in photosynthetic organisms;Biosynthesis of secondary metabolites;Carbon metabolism;Pyruvate metabolism;Methane metabolism;Microbial metabolism in diverse environments;Cysteine and methionine metabolism;Carbon fixation pathways in prokaryotes;Glyoxylate and dicarboxylate metabolism;Metabolic pathways;Citrate cycle (TCA cycle)
MAG167_gene0683	M3_1_1_k97_1011467_ORF679	MAG167	d__Bacteria;p__Bacteroidota;c__Bacteroidia;o__Flavobacteriales;f__Flavobacteriaceae;g__Robiginitalea;s__Unclassified	4075	3149	927	K00024	mdh	malate dehydrogenase [EC:1.1.1.37]	Carbon fixation in photosynthetic organisms;Biosynthesis of secondary metabolites;Carbon metabolism;Pyruvate metabolism;Methane metabolism;Microbial metabolism in diverse environments;Cysteine and methionine metabolism;Carbon fixation pathways in prokaryotes;Glyoxylate and dicarboxylate metabolism;Metabolic pathways;Citrate cycle (TCA cycle)
MAG168_gene0096	M2_2_3_k97_276380_ORF96	MAG168	d__Bacteria;p__Pseudomonadota;c__Alphaproteobacteria;o__Rhizobiales;f__Rhizobiaceae;g__Salaquimonas;s__Unclassified	7648	8613	966	K00024	mdh	malate dehydrogenase [EC:1.1.1.37]	Carbon fixation in photosynthetic organisms;Biosynthesis of secondary metabolites;Carbon metabolism;Pyruvate metabolism;Methane metabolism;Microbial metabolism in diverse environments;Cysteine and methionine metabolism;Carbon fixation pathways in prokaryotes;Glyoxylate and dicarboxylate metabolism;Metabolic pathways;Citrate cycle (TCA cycle)
MAG169_gene1509	M2_2_3_k97_1842676_ORF1495	MAG169	d__Bacteria;p__Pseudomonadota;c__Alphaproteobacteria;o__Rhizobiales;f__Aestuariivirgaceae;g__Anderseniella;s__Unclassified	166	1128	963	K00024	mdh	malate dehydrogenase [EC:1.1.1.37]	Carbon fixation in photosynthetic organisms;Biosynthesis of secondary metabolites;Carbon metabolism;Pyruvate metabolism;Methane metabolism;Microbial metabolism in diverse environments;Cysteine and methionine metabolism;Carbon fixation pathways in prokaryotes;Glyoxylate and dicarboxylate metabolism;Metabolic pathways;Citrate cycle (TCA cycle)
MAG170_gene1380	M1_1_2_k97_825445_ORF1360	MAG170	d__Bacteria;p__Pseudomonadota;c__Alphaproteobacteria;o__Rhizobiales;f__Methyloligellaceae;g__Methyloceanibacter;s__Unclassified	2681	3649	969	K00024	mdh	malate dehydrogenase [EC:1.1.1.37]	Carbon fixation in photosynthetic organisms;Biosynthesis of secondary metabolites;Carbon metabolism;Pyruvate metabolism;Methane metabolism;Microbial metabolism in diverse environments;Cysteine and methionine metabolism;Carbon fixation pathways in prokaryotes;Glyoxylate and dicarboxylate metabolism;Metabolic pathways;Citrate cycle (TCA cycle)
MAG172_gene1053	M2_2_2_k97_1503802_ORF1050	MAG172	d__Bacteria;p__Desulfobacterota;c__DSM-4660;o__Desulfatiglandales;f__Desulfatiglandaceae;g__B46-G9;s__Unclassified	2084	1146	939	K00024	mdh	malate dehydrogenase [EC:1.1.1.37]	Carbon fixation in photosynthetic organisms;Biosynthesis of secondary metabolites;Carbon metabolism;Pyruvate metabolism;Methane metabolism;Microbial metabolism in diverse environments;Cysteine and methionine metabolism;Carbon fixation pathways in prokaryotes;Glyoxylate and dicarboxylate metabolism;Metabolic pathways;Citrate cycle (TCA cycle)
[truncated: 25,236 more rows]
