# Supplementary material for: Divergent microbial community and functional dynamics in mangrove sediments along a polycyclic aromatic hydrocarbons (PAHs) gradient in China
Source: Research Square preprint supplement (doi:10.21203/rs.3.rs-7178259/v1), 2025-09-17
Supplement: Supplementary file 4 [file 4c9f884035ec191c5470e419.xlsx]

## Sheet: KW test P<0.05
Name	CPT-Mean(%)	CPT-Sd(%)	DY-Mean(%)	DY-Sd(%)	FG-Mean(%)	FG-Sd(%)	M1-Mean(%)	M1-Sd(%)	M2-Mean(%)	M2-Sd(%)	M3-Mean(%)	M3-Sd(%)	Pvalue	Corrected pvalue
2.7.7.50	0	0	0.000207115	9.16835e-05	0	0	0	0	0	0	0	0	1.56e-06	0.0001652
2.7.8.11	0	0	0	0	0	0	0.000472153	0.000655861	0	0	0	0	1.787e-06	0.0001652
1.3.7.3	0	0	0	0	0	0	0.000479112	0.000509947	0	0	0	0	1.787e-06	0.0001652
1.14.11.48	0	0	0	0	0	0	0.000189854	0.000275642	0	0	0	0	1.787e-06	0.0001652
2.1.1.347	0	0	0	0	0	0	0	0	7.65426e-05	7.51621e-05	0	0	1.787e-06	0.0001652
1.14.14.15	7.44295e-05	6.01318e-05	0	0	0	0	0	0	0	0	0	0	2.311e-06	0.0001652
2.7.1.173	0	0	0	0	0	0	9.96462e-05	5.97664e-05	0.000264347	0.000177589	0	0	2.503e-06	0.0001652
4.2.1.131	0.00104669	0.000262689	0.00264666	0.000314059	0.00419576	0.000668339	0.0103788	0.00213668	0.00764553	0.000888554	0.00551129	0.000156483	2.597e-06	0.0001652
1.3.7.7	0.00469714	0.000767565	0.00878117	0.00163087	0.0164459	0.00307141	0.0497944	0.00829942	0.0329554	0.00396507	0.0226732	0.000722196	2.725e-06	0.0001652
2.5.1.62	0.0012465	0.000190895	0.00276182	4.95061e-05	0.00382111	0.000452856	0.0148387	0.00320362	0.0105389	0.00121673	0.00643204	0.000524455	2.725e-06	0.0001652
2.5.1.133	0.0012465	0.000190895	0.00276182	4.95061e-05	0.00382111	0.000452856	0.0148387	0.00320362	0.0105389	0.00121673	0.00643204	0.000524455	2.725e-06	0.0001652
1.3.7.15	0.00445184	0.000858616	0.0092257	0.00077645	0.0139336	0.00190178	0.0489134	0.00931818	0.0349055	0.00450843	0.0200693	0.00125611	2.975e-06	0.0001652
1.3.7.14	0.00445184	0.000858616	0.0092257	0.00077645	0.0139336	0.00190178	0.0489134	0.00931818	0.0349055	0.00450843	0.0200693	0.00125611	2.975e-06	0.0001652
4.1.99.3	0.0728759	0.00214756	0.0857182	0.00466871	0.0872295	0.00477591	0.128009	0.0134768	0.110927	0.00419502	0.0998611	0.00199764	3.044e-06	0.0001652
1.3.7.13	3.92205e-05	3.12484e-05	0.000247226	8.70086e-05	0.00017746	9.48416e-05	0.00267673	0.000721796	0.00143543	0.000362464	0.000744754	0.00015577	3.194e-06	0.0001652
1.3.1.75	0.00160242	0.000453466	0.00303449	1.62248e-05	0.00445001	0.000740415	0.0117905	0.00151561	0.0134062	0.000970463	0.00599721	0.000208764	3.326e-06	0.0001652
4.2.1.165	0.0010903	0.000302023	0.00194243	0.000579902	0.00343023	0.000629071	0.0102372	0.00216498	0.00841435	0.00121201	0.00487113	0.000227749	3.444e-06	0.0001652
6.4.1.9	0.00011428	6.26372e-05	0.000259887	2.72302e-05	0.00234977	0.00141746	0	0	0	0	0.000555639	0.000256149	3.574e-06	0.0001652
2.3.1.5	0.000423744	9.05013e-05	2.04758e-05	1.79696e-05	0.000112636	8.58814e-05	0	0	0	0	0	0	3.587e-06	0.0001652
1.11.1.21	0.115348	0.0039757	0.153555	0.00516904	0.132829	0.00296334	0.170085	0.0103749	0.126278	0.00490369	0.142312	0.00368098	3.615e-06	0.0001652
1.14.13.81	0.0018026	0.000447916	0.00468518	3.37563e-05	0.00606815	0.001384	0.0201417	0.0039312	0.0107159	0.00141469	0.00725257	0.000652175	3.74e-06	0.0001652
2.1.1.210	0.00227165	0.000478767	0.00293383	0.000336717	0.00458873	0.000551422	0.012208	0.00240966	0.0101588	0.00146885	0.0061483	0.00030412	3.795e-06	0.0001652
2.8.4.1	0.000506418	9.93737e-05	0.00325288	0.000423274	0.00820439	0.00465076	0.000198928	7.12802e-05	9.48377e-05	9.66032e-05	0.00299684	0.00032027	3.802e-06	0.0001652
6.3.3.7	0.000124193	7.26216e-05	0.00048666	9.18101e-05	0.00231734	0.00126885	0	0	1.34142e-05	2.82125e-05	0.000635562	0.000150747	3.847e-06	0.0001652
3.2.1.55	0.0750103	0.00651011	0.0364904	0.00412432	0.0478753	0.00395373	0.0259944	0.00379894	0.0618048	0.0065589	0.0302697	0.0014957	3.992e-06	0.0001652
6.1.1.27	0.000166518	8.90379e-05	0.000414039	0.000207615	0.00225217	0.00135913	6.56425e-06	1.60791e-05	1.11767e-05	1.24374e-05	0.000749647	0.000188993	3.992e-06	0.0001652
6.6.1.1	0.0562111	0.00167571	0.0442199	0.0029571	0.0638542	0.00417615	0.124267	0.0108667	0.079519	0.00810617	0.0723624	0.0025545	4.01e-06	0.0001652
1.3.99.27	0.00228184	0.00033084	0.00287383	0.000539085	0.00539221	0.00101386	0.0145786	0.00284598	0.0111995	0.00188115	0.00832656	0.000370311	4.047e-06	0.0001652
2.1.1.344	0.000530331	0.000199929	2.39042e-05	2.17094e-05	0.000192155	8.95572e-05	0	0	0	0	0	0	4.098e-06	0.0001652
7.2.2.14	0.00392175	0.000822041	0.0107323	0.00144859	0.00624336	0.00070122	0.00153762	0.000423332	0.00130955	0.000340998	0.0122818	0.000362504	4.252e-06	0.0001652
1.7.2.2	0.00462444	0.000636615	0.0265483	0.000456709	0.0239931	0.00553679	0.00622671	0.00135354	0.00234844	0.000310493	0.0144898	0.00103427	4.342e-06	0.0001652
2.4.1.332	0.000431567	0.000264578	0.000898636	0.000454498	0.00143137	0.000609884	0.0089345	0.00104998	0.00548064	0.00100406	0.00413052	0.000556272	4.393e-06	0.0001652
4.2.1.48	0.00609993	0.000988078	0.00414228	0.000103323	0.00371816	0.000301335	0.0101881	0.00111189	0.00814138	0.000767793	0.00464786	0.000496534	4.542e-06	0.0001652
2.6.1.114	5.74979e-05	3.09525e-05	0.000109211	1.04122e-05	0.000955269	0.000539278	1.01383e-05	2.48337e-05	0	0	0.000164275	7.22324e-05	4.606e-06	0.0001652
2.5.1.73	4.45865e-05	4.08712e-05	0.000236531	3.96229e-05	0.00150855	0.00103202	2.44203e-06	5.98172e-06	0	0	0.000333642	0.000114994	4.721e-06	0.0001652
1.1.1.105	0.0065826	0.000494087	0.0107687	0.00119449	0.00876795	0.000868186	0.014721	0.00276074	0.0135589	0.00174983	0.0205982	0.000802734	4.841e-06	0.0001652
4.5.1.3	2.20017e-06	6.6005e-06	7.01768e-05	1.6776e-05	0.000213144	0.000105668	0	0	0	0	0	0	5.001e-06	0.0001652
4.2.1.117	0.000996538	0.000328632	0.0060835	0.0011401	0.0115713	0.00244212	0.00338961	0.000793102	0.00397857	0.000455965	0.00767989	0.0022982	5.037e-06	0.0001652
1.12.98.3	0.000276256	0.000114563	0.000346987	0.00013366	0.00450124	0.00293273	1.1844e-05	2.90117e-05	8.49522e-07	2.08089e-06	6.17852e-05	4.5813e-05	5.174e-06	0.0001652
2.5.1.130	0	0	8.8642e-06	1.53532e-05	5.20872e-05	5.06337e-05	0.00246363	0.000664723	0.000329756	0.000204159	0.000169769	5.39136e-05	5.215e-06	0.0001652
4.4.1.23	0.00036762	0.000191427	6.4648e-05	5.72843e-05	0.000153967	7.58273e-05	0	0	4.24169e-06	1.039e-05	0.000825729	0.000128099	5.266e-06	0.0001652
3.2.1.99	0.0271367	0.00448262	0.00503124	0.00112999	0.0126085	0.0020368	0.0048427	0.00110171	0.0162914	0.000806677	0.00608121	0.000454872	5.296e-06	0.0001652
2.3.1.273	0.00110269	0.000233573	0.000459271	0.000132382	0.000540599	0.000140863	0.00405908	0.00138537	0.00331812	0.000343098	0.00613397	0.000405603	5.37e-06	0.0001652
1.1.1.298	4.19214e-05	2.9304e-05	7.24692e-05	4.01553e-05	0.000683468	0.000497452	0.00352757	0.00164751	0.00152315	0.000503782	0.000177205	5.80439e-05	5.377e-06	0.0001652
1.7.2.5	0.0192971	0.0017491	0.0196546	0.000108958	0.0391575	0.00774877	0.0142094	0.00221665	0.00585316	0.000731883	0.0232374	0.00196341	5.41e-06	0.0001652
2.7.1.4	0.0609882	0.00273439	0.055312	0.000625303	0.0643788	0.00101565	0.0766937	0.00635204	0.0905148	0.00312038	0.0692123	0.00158765	5.454e-06	0.0001652
1.11.2.3	1.96702e-06	5.90106e-06	0.000108573	7.27721e-05	0.000411415	0.000223405	0	0	0	0	0	0	5.557e-06	0.0001652
1.1.1.29	0.0121026	0.000716357	0.0186592	0.00170613	0.0155367	0.00108601	0.021542	0.000856049	0.0220741	0.00219124	0.0176338	0.000933089	5.567e-06	0.0001652
2.7.1.209	0	0	2.30083e-05	2.10664e-05	0	0	0	0	0	0	0.000326686	9.05318e-05	5.567e-06	0.0001652
2.5.1.44	0.0104756	0.00120434	0.0146408	0.00146965	0.0183987	0.00316444	0.00481405	0.00119822	0.00379691	0.000769607	0.0147526	0.000638919	5.59e-06	0.0001652
4.3.2.5	0.0311074	0.00462926	0.0171353	0.00199679	0.0138352	0.0022579	0.0122001	0.0038604	0.0064302	0.000645176	0.00716178	0.000204796	5.714e-06	0.0001652
1.2.1.75	7.96994e-06	1.43754e-05	7.24692e-05	4.01553e-05	0.000675174	0.000506213	0.00344563	0.0017162	0.00138208	0.000527781	5.91498e-05	3.87827e-05	5.764e-06	0.0001652
7.1.2.1	0.0522647	0.00285531	0.0110876	0.00093039	0.024111	0.00506157	0.0350903	0.00567273	0.0638704	0.00411801	0.0299002	0.00194002	5.86e-06	0.0001652
5.4.99.18	0.0287701	0.00130018	0.0324709	0.000328568	0.0344488	0.00151259	0.0313425	0.00115293	0.0371889	0.00159039	0.0386072	0.00268633	5.941e-06	0.0001652
1.17.2.1	0.0597455	0.00412132	0.0425753	0.00455039	0.0300058	0.00531415	0.031041	0.00130233	0.0350142	0.00103604	0.0208933	0.00135981	5.966e-06	0.0001652
1.14.99.57	0.00362606	0.000691958	0.00165732	0.000610041	0.00416532	0.00110376	0.00734174	0.00138214	0.0152893	0.00192766	0.0100538	0.00100636	5.982e-06	0.0001652
1.14.11.75	9.25987e-05	3.79627e-05	0	0	2.72224e-06	6.66809e-06	0	0	0	0	0	0	6.109e-06	0.0001652
1.2.1.92	8.11454e-05	5.49578e-05	0	0	2.53557e-06	6.21084e-06	0	0	0	0	0	0	6.109e-06	0.0001652
2.7.1.179	4.85832e-05	3.81552e-05	0	0	3.59928e-06	8.81639e-06	0	0	0	0	0	0	6.109e-06	0.0001652
3.2.1.172	0.0218515	0.00350588	0.0119056	0.00271623	0.0159984	0.00414312	0.0106883	0.00172097	0.0311208	0.00471928	0.00740839	0.000773379	6.129e-06	0.0001652
4.1.1.52	0.010605	0.0016455	0.00324009	0.000316329	0.00363023	0.000881457	0.00211709	0.000372747	0.00688225	0.0012924	0.00263317	0.000230823	6.141e-06	0.0001652
4.1.99.13	0.0366599	0.0032658	0.0519889	0.00121841	0.0520685	0.0051982	0.0825124	0.00682492	0.0704196	0.00508904	0.0713041	0.00242601	6.207e-06	0.0001652
4.3.99.5	0.000259201	0.000100766	0	0	2.38997e-05	2.71722e-05	0	0	0	0	8.68516e-05	5.54559e-05	6.226e-06	0.0001652
5.1.3.5	0.00578212	0.000673051	0.00175872	0.000618439	0.00235711	0.00020433	0.00365405	0.000635247	0.00324773	0.000266282	0.00198793	0.000225227	6.237e-06	0.0001652
1.3.1.111	0.00407289	0.000497632	0.00378731	0.000403022	0.00567205	0.00091972	0.0166382	0.0028035	0.0125019	0.00150409	0.00652433	0.000565787	6.241e-06	0.0001652
1.3.1.83	0.00407289	0.000497632	0.00378731	0.000403022	0.00567205	0.00091972	0.0166382	0.0028035	0.0125019	0.00150409	0.00652433	0.000565787	6.241e-06	0.0001652
3.4.21.62	0.0378052	0.00140447	0.0325847	0.00196798	0.0450701	0.00187892	0.0307666	0.00234152	0.0310895	0.00162846	0.0259579	0.000821914	6.293e-06	0.0001652
3.4.21.69	0	0	0	0	0	0	4.12206e-05	4.95482e-05	0.000226072	0.000143025	0.000273248	5.08407e-05	6.474e-06	0.0001652
3.1.1.86	0.0024558	0.00047956	0.000306591	5.7237e-05	0.000599435	0.000283552	6.89075e-05	9.04118e-05	0.000811765	0.000248963	2.90426e-05	1.85849e-05	6.481e-06	0.0001652
1.1.1.396	0.00188698	0.000353231	0.00219256	0.000497369	0.00479733	0.000810567	0.012285	0.0024805	0.00939582	0.00116045	0.00489699	0.000557646	6.485e-06	0.0001652
3.6.1.26	0.00079582	0.000184969	1.25814e-05	2.17917e-05	0.000117998	9.48921e-05	0	0	0	0	0.000883019	0.000217126	6.489e-06	0.0001652
1.14.19.45	0.0341276	0.00233791	0.0390038	0.000329789	0.0282278	0.00121142	0.0326006	0.00274031	0.0246758	0.00195895	0.0200458	0.00119709	6.527e-06	0.0001652
1.14.19.23	0.0341276	0.00233791	0.0390038	0.000329789	0.0282278	0.00121142	0.0326006	0.00274031	0.0246758	0.00195895	0.0200458	0.00119709	6.527e-06	0.0001652
1.7.5.1	0.0974984	0.00894377	0.126666	0.00345632	0.0928454	0.00748281	0.0540133	0.0120959	0.0399266	0.00244051	0.149665	0.00626616	6.662e-06	0.0001652
1.4.3.20	0.00134789	0.000248926	0.00033982	0.000150056	0.000855976	0.000307895	6.8749e-05	4.92692e-05	0.000282769	8.62667e-05	0.000204824	5.37106e-05	6.749e-06	0.0001652
5.4.4.3	0.00163796	0.000272254	0.00720935	0.00129332	0.00347696	0.0010924	0.000543013	0.000322415	0.00021492	7.74509e-05	0.0021489	0.00048531	6.782e-06	0.0001652
3.4.13.23	0.0527151	0.00128888	0.0549278	0.00260343	0.0556128	0.00244358	0.0455189	0.00170586	0.0395337	0.002151	0.0623773	0.00207907	6.847e-06	0.0001652
3.1.4.58	0.0312852	0.00126613	0.0349084	0.00106058	0.034441	0.0019201	0.0366903	0.000855234	0.0426511	0.00113823	0.0393309	0.00126446	6.85e-06	0.0001652
2.4.2.47	0.00389466	0.00042578	0.00171332	0.000192748	0.00243398	0.000223952	0.000850313	0.000478327	0.000719993	0.000142057	0.00155455	0.00021478	6.888e-06	0.0001652
1.1.5.13	0.0250134	0.000670428	0.0218396	0.000398157	0.0188587	0.000993545	0.0235275	0.00104417	0.0267393	0.00118431	0.0192711	0.000751239	6.96e-06	0.0001652
2.4.2.46	0.00118134	0.000303133	0.000449921	0.000156341	0.00066545	0.000140518	0.000266803	0.000102251	0.000124824	5.2533e-05	0.00142117	0.000153702	6.998e-06	0.0001652
2.1.1.266	0.00638865	0.0009803	0.0115326	0.000620635	0.0119104	0.00172983	0.00318014	0.000388737	0.00309155	0.000297942	0.013698	0.00136382	7.002e-06	0.0001652
6.2.1.36	0.000284265	0.000112772	0.000104517	7.02276e-05	0.00133879	0.000641045	0.00524662	0.00228499	0.00170339	0.000567081	6.66378e-05	4.94824e-05	7.022e-06	0.0001652
5.5.1.24	0.00349662	0.000674551	0.00710611	0.000754714	0.0108387	0.00178058	0.0134518	0.00406149	0.0160494	0.000791981	0.0222535	0.00119445	7.084e-06	0.0001652
3.5.2.5	0.043311	0.00238432	0.0305038	0.000945731	0.0338071	0.00427472	0.0341368	0.00494094	0.0209075	0.00130363	0.0248273	0.00118307	7.114e-06	0.0001652
4.2.1.49	0.0418656	0.00174196	0.0729514	0.000985663	0.06605	0.00651313	0.0510942	0.00486574	0.0487943	0.00327362	0.0625681	0.000979188	7.122e-06	0.0001652
1.13.11.49	0.000357248	8.68643e-05	0.000121982	5.7935e-05	0.00112137	0.000459733	4.91634e-05	6.87893e-05	0	0	0.000102271	8.33396e-05	7.159e-06	0.0001652
1.3.7.5	2.9048e-06	5.76452e-06	0	0	9.28739e-05	9.40307e-05	0.00266806	0.0013002	0.000297651	0.000127392	0.000332508	7.67625e-05	7.19e-06	0.0001652
4.2.2.2	0.0224442	0.00382906	0.00882257	0.00108448	0.0112159	0.00292166	0.00847753	0.000695779	0.0168425	0.00490426	0.00649688	0.000802742	7.201e-06	0.0001652
2.3.1.293	0.00132048	0.000275424	0.00034298	0.000112683	0.000805093	0.000447463	0.000159669	5.41428e-05	0.000102494	4.70021e-05	0.00188149	0.00022716	7.217e-06	0.0001652
2.3.1.294	0.00132048	0.000275424	0.00034298	0.000112683	0.000805093	0.000447463	0.000159669	5.41428e-05	0.000102494	4.70021e-05	0.00188149	0.00022716	7.217e-06	0.0001652
4.3.1.28	0.000570528	0.000195613	0.000335008	1.18251e-05	0.00138426	0.000262443	0.00452386	0.0013396	0.00423055	0.00097176	0.00292313	0.000250913	7.355e-06	0.0001652
6.2.1.49	0.00322436	0.000676165	0.000190432	0.000137475	0.00046319	0.000147652	4.30698e-05	5.23814e-05	3.08274e-05	3.98551e-05	0.000573119	0.00017621	7.381e-06	0.0001652
1.3.99.23	0.0461801	0.0020311	0.0566066	0.00193837	0.0438531	0.00341386	0.0742846	0.00572025	0.06278	0.00233256	0.0599854	0.00143276	7.407e-06	0.0001652
3.5.3.11	0.0370116	0.00230966	0.0426855	0.00157385	0.0345874	0.00129371	0.065252	0.00288909	0.0469488	0.00132877	0.0407026	0.00183727	7.422e-06	0.0001652
4.2.2.9	0.00179768	0.000449463	0.000187027	7.81746e-05	0.000672693	0.000368767	0.000152011	0.000148422	0.000815333	0.00017469	3.06053e-05	1.8548e-05	7.468e-06	0.0001652
1.14.17.3	0.00348357	0.000782402	0.00204217	0.000698888	0.00121208	0.000272035	0.000850588	0.000382116	0.000408771	8.08044e-05	0.000271659	0.000102954	7.483e-06	0.0001652
3.4.17.22	0.00374949	0.000572073	0.00693674	0.00107872	0.0117964	0.0043787	0.00475487	0.00067085	0.0119851	0.00407712	0.00586993	0.000364799	7.487e-06	0.0001652
3.2.1.40	0.117743	0.0115132	0.068273	0.00936983	0.105625	0.00443696	0.0655833	0.00945899	0.157041	0.00497541	0.0735266	0.00333649	7.514e-06	0.0001652
2.3.1.8	0.0350609	0.00308077	0.0344205	0.000854944	0.0388388	0.0017954	0.0506784	0.00372637	0.060148	0.00176596	0.0562107	0.00122279	7.514e-06	0.0001652
3.2.1.59	0	0	0	0	5.62041e-06	1.37671e-05	0.000178797	0.000105163	3.71654e-05	3.14988e-05	0.00061741	7.8446e-05	7.545e-06	0.0001652
3.2.1.199	0.00241197	0.000295204	0.00384527	0.000574457	0.00462827	0.00127052	0.00588766	0.00113887	0.00773422	0.000822334	0.00794602	0.000771945	7.574e-06	0.0001652
6.3.1.1	0.00672098	0.000705175	0.009804	0.00155741	0.00730977	0.000890885	0.0128035	0.000930733	0.0174304	0.00126292	0.00979408	0.000883075	7.585e-06	0.0001652
2.4.1.7	0.010701	0.00159161	0.00804882	0.00152146	0.00809044	0.000893342	0.0222877	0.00383244	0.0293978	0.00625842	0.0180036	0.00121997	7.621e-06	0.0001652
3.2.2.24	0.00864106	0.00107486	0.0122973	0.000415455	0.0148634	0.000735602	0.00825856	0.0016919	0.0136766	0.00109952	0.0174488	0.000483345	7.68e-06	0.0001652
2.7.4.34	0.0664455	0.00242392	0.0768642	0.0036337	0.0754957	0.00567671	0.0936559	0.007828	0.0974352	0.0121552	0.118307	0.00385407	7.717e-06	0.0001652
3.5.1.126	0.00607953	0.000544856	0.00263943	0.00101417	0.00367676	0.000361106	0.00340901	0.00103542	0.00115923	0.000195444	0.00219954	0.000192678	7.726e-06	0.0001652
3.1.4.12	0.00122994	0.000200987	0.00135451	0.000132531	0.0022078	0.000499425	0.000888359	0.000208571	0.000335656	0.000167107	0.000414549	0.000130823	7.94e-06	0.0001652
2.3.2.3	0.0230149	0.0028648	0.0145577	0.00205022	0.0114282	0.00233902	0.00828498	0.00177877	0.0164044	0.00145065	0.013423	0.00119622	7.956e-06	0.0001652
3.1.4.3	0.0160136	0.00193042	0.0138508	0.000917654	0.0107545	0.00240303	0.00567716	0.000916316	0.00519407	0.000320846	0.00884541	0.000277834	8.132e-06	0.0001652
1.8.7.1	0.0276018	0.00139473	0.0118226	0.00175178	0.0197913	0.00273934	0.0173601	0.00354381	0.0144487	0.00214527	0.0310283	0.00176733	8.212e-06	0.0001652
1.4.1.11	0.000725593	0.000224943	0.00179699	0.000385861	0.00233938	0.000683887	0.000881473	0.000251892	0.0029852	0.000518519	0.00718361	0.00037161	8.212e-06	0.0001652
1.2.1.67	0.00865865	0.000752992	0.00547087	0.00130218	0.00365831	0.000680192	0.00331185	0.000368799	0.00133899	9.46781e-05	0.00231717	0.000835093	8.335e-06	0.0001652
2.7.7.69	1.41551e-05	1.9762e-05	0.000360241	9.816e-05	0.000203272	0.000128653	0.000116367	8.83186e-05	0.000374438	6.75847e-05	0.00142935	0.00016055	8.339e-06	0.0001652
5.4.4.2	0.018912	0.00118377	0.0210452	0.000327769	0.0242134	0.00175554	0.0286419	0.00408673	0.0315957	0.00344707	0.0352567	0.00189262	8.341e-06	0.0001652
2.3.1.15	0.0385803	0.00184793	0.0632773	0.00144226	0.0402399	0.00406171	0.0684286	0.0050908	0.0497719	0.00377449	0.0613561	0.00345587	8.348e-06	0.0001652
2.3.1.280	0.0026717	0.000368624	0.00350407	0.000434027	0.00356543	0.00042266	0.00143095	0.000417826	0.00131221	0.000607239	0.00414661	0.000451126	8.369e-06	0.0001652
3.1.1.3	0.0594822	0.00367321	0.0594285	0.00156718	0.0686243	0.00356568	0.0912028	0.0121001	0.0914074	0.00731803	0.109615	0.00387112	8.434e-06	0.0001652
2.3.1.303	0	0	0	0	0	0	0.000310883	0.000102997	0.000260295	0.000195206	1.33205e-05	2.25153e-05	8.455e-06	0.0001652
5.4.99.13	0.0468181	0.00281339	0.0884654	0.00126987	0.0664614	0.00522514	0.0857298	0.007628	0.0702513	0.0039206	0.0914962	0.00313352	8.531e-06	0.0001652
4.3.1.7	0.0123557	0.000901174	0.00747761	0.00254317	0.00789863	0.000857403	0.00281144	0.000716933	0.00397978	0.00108787	0.00774722	0.0011738	8.572e-06	0.0001652
4.6.1.2	0.000820311	0.000165839	0.00335604	0.000465437	0.00155002	0.000283224	0.0023441	0.00087339	0.00112963	0.000228911	0.00340318	0.000274454	8.577e-06	0.0001652
3.1.1.56	9.57229e-05	5.91866e-05	0	0	0.00028251	7.78596e-05	1.58709e-05	1.76578e-05	6.56777e-06	1.60877e-05	0	0	8.588e-06	0.0001652
3.1.1.84	9.57229e-05	5.91866e-05	0	0	0.00028251	7.78596e-05	1.58709e-05	1.76578e-05	6.56777e-06	1.60877e-05	0	0	8.588e-06	0.0001652
3.1.3.105	0.00846462	0.000697698	0.0167216	0.00166527	0.0139681	0.00148324	0.0122154	0.000686365	0.0137888	0.00124035	0.0175745	0.000756714	8.613e-06	0.0001652
2.3.1.284	0.000716356	0.000122403	0.000227269	0.000169815	0.000417764	0.000174208	0.000105291	8.68686e-05	7.09338e-05	6.67025e-05	0.00345271	0.000675991	8.681e-06	0.0001652
1.1.1.60	0.0342705	0.00156223	0.0306594	0.00230552	0.0206674	0.00293743	0.0260656	0.00150726	0.024764	0.00261786	0.0183309	0.00195605	8.731e-06	0.0001652
4.1.1.44	0.115262	0.00279241	0.0601905	0.00368019	0.0581092	0.00958979	0.0691255	0.00437851	0.123851	0.00577367	0.0529219	0.00106386	8.751e-06	0.0001652
1.1.99.39	0.00564544	0.000637737	0.00813062	0.000359871	0.00804371	0.00115552	0.0118187	0.00125483	0.0072846	0.00112215	0.0157182	0.00120054	8.757e-06	0.0001652
3.4.24.81	7.32441e-07	2.19732e-06	0.000546199	0.000210754	0	0	0.000245132	0.000211574	6.84501e-05	2.71027e-05	3.66529e-06	5.95641e-06	8.791e-06	0.0001652
3.4.13.9	0.126652	0.00378783	0.117083	0.00411542	0.110595	0.0041316	0.126343	0.0132517	0.104583	0.00427383	0.091081	0.0029085	8.799e-06	0.0001652
3.5.3.8	0.00379369	0.000944178	0.0131817	0.000943311	0.0118192	0.00237119	0.00589939	0.0023715	0.00675011	0.000830509	0.0161245	0.000868737	8.817e-06	0.0001652
1.1.99.42	0.00863017	0.000895232	0.00711843	0.00078395	0.00514491	0.000538069	0.00476623	0.000771637	0.00288173	0.000507167	0.00563822	0.000495091	8.839e-06	0.0001652
5.5.1.19	0.0136453	0.00174331	0.0146629	0.000294808	0.0198191	0.00178665	0.0258792	0.00552271	0.0235009	0.00117382	0.0360711	0.00126144	8.847e-06	0.0001652
3.6.1.63	0.00550175	0.00036597	0.00221402	0.000839863	0.00553117	0.000339543	0.00763209	0.00221646	0.00374227	0.000382935	0.00441554	0.000498038	8.993e-06	0.0001652
1.14.13.211	0.00326581	0.000572314	0.000411778	6.33703e-05	0.00147384	0.000488047	0.00106696	0.00028607	0.000796266	0.000287675	0.00033176	0.00011228	9.022e-06	0.0001652
3.4.24.28	0.024625	0.00177725	0.0210893	0.00159456	0.0273737	0.00397828	0.0141276	0.00159514	0.0190492	0.000950664	0.0152658	0.000759339	9.03e-06	0.0001652
2.7.7.67	0.00132909	0.000246938	0.0023476	0.000413442	0.00374846	0.000582519	0.000826086	0.000201848	0.00143709	0.000237428	0.00216564	0.000340807	9.034e-06	0.0001652
4.2.1.141	0.0126058	0.000717912	0.0104246	0.00112536	0.00929201	0.00130234	0.00559289	0.0012099	0.00696158	0.000443899	0.00640111	0.000490824	9.061e-06	0.0001652
2.1.1.21	0.0636853	0.00489867	0.0477058	0.000798042	0.04748	0.00530008	0.0859411	0.0137074	0.0560397	0.00366032	0.0516147	0.0027778	9.065e-06	0.0001652
5.4.99.17	0.035452	0.00411897	0.0186838	0.00105541	0.0229064	0.00342698	0.0252368	0.00535192	0.0149512	0.00177753	0.0170465	0.000944239	9.098e-06	0.0001652
4.2.1.129	0.035452	0.00411897	0.0186838	0.00105541	0.0229064	0.00342698	0.0252368	0.00535192	0.0149512	0.00177753	0.0170465	0.000944239	9.098e-06	0.0001652
2.4.1.64	0.0373295	0.00315595	0.013362	0.00304212	0.0210559	0.00522255	0.0300015	0.00305825	0.0287028	0.00318953	0.0202788	0.000761712	9.111e-06	0.0001652
1.2.1.83	0.000180942	8.89876e-05	0.000291619	7.52011e-05	0.000827049	0.000388289	1.79427e-05	2.05062e-05	0.000424531	0.000156787	2.92395e-05	2.50431e-05	9.138e-06	0.0001652
7.1.1.2	1.22139	0.0266147	1.52771	0.00977654	1.42123	0.0545774	1.31401	0.0271315	1.25226	0.0433627	1.45728	0.0173426	9.161e-06	0.0001652
2.4.1.230	0.00259487	0.000361545	0.00268154	0.000816043	0.00712785	0.000701813	0.00504586	0.000872077	0.007292	0.00043125	0.00602917	0.000457292	9.184e-06	0.0001652
5.3.1.23	0.0485576	0.00212556	0.0604363	0.000186918	0.0528235	0.0013523	0.0552342	0.00275234	0.0604571	0.00226931	0.0463806	0.00160266	9.202e-06	0.0001652
1.4.1.9	0.0192918	0.00174169	0.0239564	0.0015949	0.0153004	0.00124537	0.0227421	0.00444115	0.0125918	0.00134887	0.009675	0.000396674	9.247e-06	0.0001652
3.7.1.12	0.00939932	0.000647325	0.00554139	0.000485698	0.00669921	0.000933389	0.0113494	0.00175783	0.00495454	0.000532917	0.00489113	0.000582506	9.261e-06	0.0001652
1.14.13.244	0.00240082	0.000481633	0.0032379	0.000808521	0.00712926	0.00197366	0.00526456	0.00113445	0.00415538	0.000561421	0.0101687	0.000910414	9.293e-06	0.0001652
4.2.1.42	0.00898112	0.00153674	0.00455273	0.000167509	0.00618272	0.00147941	0.00234776	0.000344026	0.00499068	0.000969821	0.00317292	0.00058041	9.293e-06	0.0001652
1.14.13.243	0.00240082	0.000481633	0.0032379	0.000808521	0.00712926	0.00197366	0.00526456	0.00113445	0.00415538	0.000561421	0.0101687	0.000910414	9.293e-06	0.0001652
2.7.8.24	0.00892769	0.00122008	0.00743475	0.000896255	0.00751067	0.00120594	0.00444569	0.00105289	0.00231496	0.000371014	0.00545953	0.000421266	9.31e-06	0.0001652
2.3.1.269	0.0887186	0.0021556	0.085466	0.000689984	0.0768041	0.0036187	0.08177	0.00197343	0.0787472	0.00177313	0.0722668	0.00224911	9.363e-06	0.0001652
1.1.1.65	0.0555319	0.0024813	0.038307	0.000642915	0.0352544	0.00496736	0.0438712	0.00188534	0.0555733	0.00299218	0.0496097	0.00186916	9.401e-06	0.0001652
1.10.3.9	0.00155803	0.000331137	0.0045118	0.000795304	0.00732747	0.00229132	0.0273338	0.00425277	0.00513259	0.00246687	0.00821997	0.00109827	9.419e-06	0.0001652
4.6.1.1	1.75989	0.07803	1.21414	0.0677875	0.95859	0.174076	1.45459	0.184936	1.27248	0.0750185	0.957118	0.0640218	9.483e-06	0.0001652
1.1.98.5	0.000139833	4.89845e-05	3.33548e-05	3.65267e-06	0.000234456	0.000146569	3.25766e-06	7.97961e-06	0	0	5.73123e-06	1.40386e-05	9.53e-06	0.0001652
1.16.3.3	0.131003	0.006186	0.165723	0.01118	0.133439	0.0134512	0.0875804	0.00573502	0.0869306	0.0128204	0.103369	0.0029888	9.537e-06	0.0001652
3.1.1.11	0.0268187	0.00324893	0.0126623	0.00171888	0.0164497	0.00161814	0.0113896	0.00123138	0.0268174	0.00383464	0.0100938	0.000814918	9.544e-06	0.0001652
1.13.11.92	0.00749109	0.000953673	0.00161461	0.000388232	0.00343211	0.000679326	0.0047925	0.00035975	0.00825482	0.00196119	0.00426352	0.000220856	9.57e-06	0.0001652
6.1.1.4	0.160191	0.0050821	0.181487	0.00206728	0.176322	0.00253246	0.167085	0.00720665	0.147739	0.00319612	0.182631	0.00352009	9.609e-06	0.0001652
2.8.2.40	0.0323608	0.00136615	0.0199923	0.000826082	0.0265952	0.00229021	0.0285926	0.00272694	0.0367616	0.00150256	0.0240691	0.00193276	9.629e-06	0.0001652
1.1.3.20	0.0104858	0.000485237	0.00553577	0.00081852	0.00827148	0.000843584	0.004253	0.00148047	0.00701961	0.0011675	0.00490997	0.000419264	9.646e-06	0.0001652
2.7.2.16	0.00632908	0.000947097	0.00783145	0.00119045	0.00397032	0.000686303	0.0100174	0.000697408	0.0130229	0.00329487	0.014395	0.00103111	9.659e-06	0.0001652
5.4.3.8	0.108599	0.00324731	0.122842	0.00793286	0.119839	0.00337801	0.110763	0.00539563	0.0973232	0.00271227	0.131353	0.00180225	9.662e-06	0.0001652
2.5.1.88	0.000554514	0.000175642	0.000359468	0.000219652	0.000823329	0.00023119	0.00245587	0.00115347	0.00280453	0.000446307	0.00739657	0.000647213	9.675e-06	0.0001652
2.8.4.4	0.0495172	0.00189891	0.0616214	0.000533909	0.0687805	0.00428213	0.0556471	0.00370212	0.0644475	0.00243766	0.0679159	0.00147249	9.774e-06	0.0001652
2.5.1.86	0.000665905	0.000131604	0.000142853	0.000176789	0.000300055	8.39286e-05	6.84562e-05	3.63783e-05	5.3543e-05	3.514e-05	0.00102117	0.000218457	9.774e-06	0.0001652
5.1.99.3	0.0127096	0.000665584	0.00897963	0.0012921	0.0102323	0.00100455	0.0111108	0.00104249	0.00607872	0.000496202	0.00649064	0.000507123	9.808e-06	0.0001652
3.1.1.107	2.77755e-06	8.33266e-06	0	0	0	0	0	0	0	0	0.000502576	0.000650318	9.82e-06	0.0001652
3.5.1.38	1.07192e-06	3.21575e-06	0	0	0	0	0	0	0	0	0.000129888	0.000182201	9.82e-06	0.0001652
3.2.1.156	0.00230309	0.000488787	0.00123384	0.000439136	0.0016227	0.000593556	0.000551618	0.000214825	0.0032852	0.000357808	0.000563524	0.000159163	9.821e-06	0.0001652
6.3.2.39	0.000373787	0.000234213	0	0	0.000115008	0.000150814	0	0	0	0	0	0	9.841e-06	0.0001652
2.5.1.124	0.000104999	4.92622e-05	0	0	0	0	0	0	6.25437e-06	9.6901e-06	0	0	9.844e-06	0.0001652
2.5.1.125	0.000104999	4.92622e-05	0	0	0	0	0	0	6.25437e-06	9.6901e-06	0	0	9.844e-06	0.0001652
3.6.1.22	0.0230609	0.00194725	0.0244594	0.00105585	0.0254127	0.00156445	0.0300581	0.00142706	0.031942	0.00212274	0.0369163	0.0018666	9.929e-06	0.0001652
1.1.99.21	0.00348515	0.000496177	0.00193245	0.000599295	0.00380893	0.000356766	0.00175625	0.000331819	0.00110655	9.12775e-05	0.00228713	0.000389024	9.929e-06	0.0001652
1.7.2.4	0.0258674	0.00195008	0.0386613	0.000960211	0.0301738	0.00587137	0.0164739	0.00473386	0.00660433	0.00131144	0.0232322	0.00130518	9.981e-06	0.0001652
3.5.1.102	0	0	2.68983e-05	4.65892e-05	0	0	0	0	0	0	0.000122861	8.9258e-05	9.99e-06	0.0001652
2.7.7.87	0.0453208	0.00219707	0.0601452	0.00504221	0.0603456	0.00761826	0.0626333	0.00614234	0.0748799	0.00332528	0.0800986	0.00206926	1.001e-05	0.0001652
1.2.7.1	0.201077	0.00948228	0.288114	0.0151283	0.219916	0.010503	0.271133	0.0149844	0.253168	0.00412679	0.280892	0.0133269	1.006e-05	0.0001652
7.1.1.12	0.00748356	0.000960299	0.0294367	0.00176638	0.0194249	0.00401907	0.0188146	0.000829576	0.0116257	0.00170106	0.0228016	0.00218192	1.006e-05	0.0001652
1.6.5.9	0.0750749	0.00352172	0.0408634	0.00233684	0.0607445	0.00327266	0.0618855	0.00487377	0.0495357	0.000854599	0.0690325	0.00519037	1.007e-05	0.0001652
7.2.2.6	0.000276784	0.000130598	0.00232945	0.00114601	0.000523682	0.000261834	6.81764e-05	8.30499e-05	5.5736e-05	4.23642e-05	0.0110062	0.0025695	1.008e-05	0.0001652
1.8.1.5	0.000379226	0.000156261	8.35021e-05	0.000108033	0.000106335	8.07071e-05	1.22541e-05	2.4375e-05	8.27534e-06	7.35084e-06	0.00086065	0.000263605	1.011e-05	0.0001652
6.3.1.5	0.0266307	0.00130034	0.0323773	0.00155227	0.0337276	0.00428774	0.0240367	0.00175021	0.019282	0.00339322	0.0201429	0.000788338	1.013e-05	0.0001652
1.14.11.27	6.25415e-05	3.6536e-05	0.000116265	2.22639e-05	0.00151862	0.000998662	0.000337355	0.000196965	0.000665777	0.000130526	0.000182213	0.000104291	1.013e-05	0.0001652
5.4.3.3	0.00255717	0.000460441	0.0039479	0.001681	0.00602335	0.00140271	0.0014171	0.000652887	0.00526072	0.000723153	0.018352	0.00181776	1.019e-05	0.0001652
1.7.7.1	0.0120895	0.00117115	0.00451198	0.000514453	0.00558215	0.00158724	0.00710028	0.000949786	0.00274939	0.000467548	0.00437492	0.000516812	1.029e-05	0.0001652
3.4.19.3	0.00805436	0.000865393	0.00322762	0.000735803	0.00594914	0.000371221	0.00582541	0.000622336	0.00780108	0.000689156	0.00370174	0.000364686	1.03e-05	0.0001652
5.1.2.3	0.0600713	0.00298159	0.0787349	0.00180644	0.0713952	0.0029873	0.0800401	0.00803759	0.0638617	0.00425527	0.0939262	0.00392648	1.031e-05	0.0001652
5.1.3.38	0.000443647	0.000131504	0.000862579	0.00034065	0.00125287	0.00033455	8.70362e-05	7.98472e-05	7.74105e-05	4.02631e-05	0.000630272	0.00017532	1.038e-05	0.0001652
3.4.13.18	0.0117748	0.000719602	0.0128926	0.000732114	0.0134606	0.000817363	0.0100563	0.000900203	0.0085831	0.000924198	0.00774051	0.000731639	1.048e-05	0.0001652
2.1.1.144	0.0290104	0.00172197	0.0175694	0.00185449	0.0205288	0.00213833	0.0205089	0.00165133	0.0247693	0.000976529	0.0246611	0.000644071	1.05e-05	0.0001652
4.6.1.24	0.000994833	0.000127909	0.00385502	0.000878541	0.00398378	0.000966721	0.00280904	0.00116672	0.0047268	0.000463728	0.0106467	0.000932231	1.05e-05	0.0001652
4.2.1.44	0.0313621	0.00252049	0.0298235	0.00118705	0.0349752	0.00275379	0.0217391	0.0032018	0.0280883	0.000787856	0.0251884	0.00121964	1.053e-05	0.0001652
3.2.1.8	0.0431669	0.00249664	0.0330984	0.00256221	0.0399088	0.0020878	0.0314088	0.00426689	0.057859	0.00543676	0.0338054	0.00259098	1.054e-05	0.0001652
4.2.1.104	0.00520308	0.000679825	0.00155001	0.00045418	0.00254986	0.000724523	0.00342363	0.000598283	0.00182725	0.000281452	0.00152123	0.000128205	1.055e-05	0.0001652
2.3.1.122	0.00719817	0.000669347	0.00222093	0.000490636	0.00263047	0.00116716	0.00293144	0.000393954	0.00527704	0.000642685	0.00821675	0.000967947	1.056e-05	0.0001652
7.3.2.3	0.0020362	0.000393932	0.00326862	0.00049109	0.00603702	0.000697175	0.000887858	0.000470139	0.00117316	0.00042024	0.00586792	0.000956161	1.063e-05	0.0001652
2.7.1.121	0.0235459	0.00200379	0.0142822	0.00165234	0.0275895	0.00220325	0.0181193	0.00321753	0.0332318	0.00431567	0.0218119	0.00113219	1.067e-05	0.0001652
4.2.2.23	0.0221128	0.00198958	0.00934097	0.000661817	0.0141211	0.000627897	0.0118966	0.00220703	0.026102	0.004141	0.00915699	0.00075881	1.071e-05	0.0001652
6.1.1.9	0.145625	0.00255821	0.175557	0.00526993	0.161702	0.00553743	0.168444	0.00451066	0.150479	0.0031713	0.170492	0.00170114	1.073e-05	0.0001652
4.99.1.3	0.0142739	0.000832463	0.0100895	0.00148948	0.0130408	0.000773292	0.017055	0.00158318	0.0102994	0.00146593	0.0154659	0.000582922	1.081e-05	0.0001652
4.1.2.45	0.00255306	0.000423327	0.000182155	0.000100676	0.000511915	0.000283527	0.000111905	9.81246e-05	0.000679987	0.000334117	2.11664e-05	2.67747e-05	1.083e-05	0.0001652
4.2.2.21	0.000205083	0.000122836	0.000891459	0.000271818	0.00101409	0.000434142	0.00196034	0.000401785	0.00268474	0.000530794	0.000884672	0.000242882	1.086e-05	0.0001652
4.2.2.20	0.000205083	0.000122836	0.000891459	0.000271818	0.00101409	0.000434142	0.00196034	0.000401785	0.00268474	0.000530794	0.000884672	0.000242882	1.086e-05	0.0001652
3.5.3.17	0.00841605	0.000585317	0.0061608	5.26801e-05	0.00589905	0.000797628	0.0102585	0.00251175	0.0042356	0.000720431	0.0067577	0.000683105	1.087e-05	0.0001652
1.7.3.3	0.00407718	0.000633811	0.000883314	0.000235482	0.00140666	0.000598867	0.00100095	0.00084396	0.000116041	7.41537e-05	0.000341537	0.000211585	1.088e-05	0.0001652
3.5.1.88	0.0501948	0.00253158	0.0651518	0.00026864	0.0566608	0.00333321	0.0596145	0.00416036	0.0604927	0.00274066	0.0709	0.00227835	1.091e-05	0.0001652
1.1.2.8	0.0433976	0.00640443	0.0221867	6.42683e-05	0.0227268	0.00331191	0.0201336	0.0089852	0.010371	0.00121034	0.0111984	0.000887093	1.094e-05	0.0001652
6.1.1.26	0.000158252	4.69077e-05	0.000264138	9.35443e-05	0.000707131	0.000452454	0	0	1.88944e-05	1.49044e-05	0.000165577	0.0001022	1.095e-05	0.0001652
3.13.2.3	0.0239731	0.00121009	0.0294403	0.000360317	0.0257051	0.00175003	0.0267582	0.00132131	0.0316244	0.00262171	0.0216201	0.00104478	1.102e-05	0.0001652
6.3.2.14	0.0192284	0.00116735	0.00962205	0.000345475	0.0109994	0.00197051	0.0185655	0.0011586	0.0159499	0.000898889	0.0122774	0.0013218	1.103e-05	0.0001652
2.6.1.51	0.0748304	0.00366355	0.0712459	0.00160992	0.0662761	0.00241241	0.0702899	0.00223795	0.057571	0.00289496	0.0518536	0.0035038	1.105e-05	0.0001652
5.1.2.2	0.012634	0.0017857	0.00864545	0.000929669	0.00597316	0.0013618	0.00494597	0.00112242	0.00218701	0.000287506	0.00443358	0.000265261	1.107e-05	0.0001652
1.14.15.9	0.000638745	0.000153594	0.00196607	0.00109081	0.00329472	0.000527121	0.00520668	0.00260904	0.00445403	0.000654529	0.0094657	0.000862611	1.118e-05	0.0001652
7.2.2.1	0.24571	0.00745352	0.319246	0.00438021	0.303756	0.00600127	0.324867	0.0293996	0.261418	0.00622131	0.326229	0.00276556	1.12e-05	0.0001652
1.1.1.401	0.0210794	0.00120654	0.0155078	0.000659627	0.0205885	0.00164749	0.0146044	0.00128397	0.0115907	0.00171475	0.0183091	0.00122166	1.122e-05	0.0001652
3.5.3.9	0.00928493	0.000943774	0.00364937	0.000308526	0.00507952	0.00118577	0.0041002	0.00131781	0.00181626	0.000355135	0.00247627	0.000307859	1.124e-05	0.0001652
2.8.3.24	0.0081252	0.000867097	0.00235674	0.000331044	0.00269488	0.00110754	0.00404005	0.000676304	0.00749352	0.00149977	0.00457901	0.000431032	1.134e-05	0.0001652
1.8.5.7	0.0196346	0.00163656	0.0156388	0.000691747	0.0164842	0.000846106	0.027545	0.0048857	0.0157015	0.00199042	0.0129695	0.000631666	1.14e-05	0.0001652
2.1.1.343	8.57294e-05	4.55655e-05	0	0	1.15552e-05	2.83044e-05	0	0	0	0	0	0	1.141e-05	0.0001652
1.13.11.27	0.0172412	0.00119773	0.0299848	0.00352247	0.0273145	0.00262927	0.0241884	0.00489983	0.0138661	0.00148293	0.0203408	0.000921307	1.146e-05	0.0001652
5.3.3.23	0.00147825	0.000299053	0.00333628	0.00072223	0.00331833	0.000538934	0.00390654	0.000738351	0.00502715	0.00109545	0.00226918	0.000450169	1.149e-05	0.0001652
7.2.2.10	0.19173	0.00708526	0.237808	0.0104874	0.278922	0.0106752	0.238523	0.0257742	0.211889	0.0183859	0.301694	0.00535344	1.155e-05	0.0001652
2.1.1.72	0.0961934	0.00610732	0.105776	0.00730133	0.159517	0.0334142	0.101061	0.00384925	0.130661	0.00667821	0.164434	0.0101472	1.155e-05	0.0001652
4.2.1.119	0.0495674	0.00242122	0.0319137	0.00185702	0.032798	0.00598125	0.0433942	0.00235587	0.0421881	0.00297028	0.0328711	0.00143079	1.156e-05	0.0001652
3.5.4.33	0.0387184	0.00197148	0.0423534	0.00171607	0.0365539	0.0014559	0.0426307	0.00290068	0.0495368	0.00191883	0.0465342	0.0013544	1.16e-05	0.0001652
6.2.1.32	0.00922491	0.00102292	0.00871033	0.000728299	0.00642834	0.000739787	0.00564569	0.00168289	0.00147516	0.000353441	0.00497548	0.000429456	1.162e-05	0.0001652
3.2.1.170	0.00685766	0.000962767	0.00269887	0.000756153	0.00570059	0.000865552	0.00433373	0.000510808	0.00239633	0.000464593	0.00261063	0.00040139	1.165e-05	0.0001652
2.1.1.131	0.00914914	0.000920869	0.00503366	0.000585473	0.00692498	0.000989476	0.010625	0.00151127	0.00456699	0.0004752	0.00537516	0.000448375	1.173e-05	0.0001652
2.3.3.20	0.00592936	0.00108932	0.00580735	0.00121474	0.00950519	0.00145173	0.010093	0.000967973	0.0133819	0.00142542	0.0084637	0.000793146	1.175e-05	0.0001652
4.2.3.209	0.000120399	5.8648e-05	0	0	1.36286e-05	2.4513e-05	0	0	0	0	0	0	1.175e-05	0.0001652
2.7.8.26	0.0126633	0.00097546	0.00908849	0.00132385	0.0118379	0.00171017	0.0147731	0.0008101	0.0104087	0.00068498	0.0192603	0.0019159	1.178e-05	0.0001652
3.5.4.26	0.0488186	0.00220721	0.0472529	0.00110946	0.0459915	0.00226904	0.0553419	0.00261286	0.0558232	0.00149222	0.0611267	0.00303327	1.18e-05	0.0001652
1.1.1.193	0.0488186	0.00220721	0.0472529	0.00110946	0.0459915	0.00226904	0.0553419	0.00261286	0.0558232	0.00149222	0.0611267	0.00303327	1.18e-05	0.0001652
2.1.1.272	0.00915785	0.000877592	0.00488733	0.000604136	0.00638642	0.000865648	0.0105027	0.00154034	0.00433683	0.000479398	0.00479709	0.0004666	1.183e-05	0.0001652
7.1.2.2	0.246774	0.00758105	0.319708	0.00434108	0.304549	0.0059726	0.32589	0.0298556	0.26178	0.00618716	0.326615	0.00263939	1.184e-05	0.0001652
7.1.1.11	0.0608816	0.00512513	0.107941	0.00709502	0.0837011	0.0185969	0.111188	0.0116449	0.1376	0.00846076	0.0937856	0.00849392	1.184e-05	0.0001652
7.2.1.2	0.0608816	0.00512513	0.107941	0.00709502	0.0837011	0.0185969	0.111188	0.0116449	0.1376	0.00846076	0.0937856	0.00849392	1.184e-05	0.0001652
2.4.1.333	0.00304921	0.000478231	0.00237903	0.000283568	0.00105042	0.000210251	0.00116421	0.000419222	0.00698905	0.000795212	0.00293542	0.000182107	1.185e-05	0.0001652
4.1.3.40	0.0040935	0.000572346	0.00880116	0.000278911	0.0081318	0.000928831	0.00945642	0.000590709	0.0115242	0.00156576	0.0116098	0.000736124	1.186e-05	0.0001652
1.2.1.80	0.00718898	0.000883888	0.00895192	0.00101837	0.0158368	0.00121358	0.0166537	0.00397349	0.0140592	0.000913961	0.0229656	0.000469798	1.189e-05	0.0001652
1.1.1.56	0.00362074	0.000430449	0.00252816	0.000810498	0.00232842	0.0003833	0.00316836	0.000365375	0.00466988	0.000451407	0.00168776	0.000149331	1.197e-05	0.0001652
1.1.3.44	0.00212445	0.000592959	0.000859855	0.000226857	0.000429058	0.000133948	0.000723756	0.000207875	0.000268357	0.000111308	0.000237218	0.000104208	1.197e-05	0.0001652
2.7.7.7	0.868577	0.0101724	1.00077	0.0130256	0.968302	0.0399577	0.977038	0.0258845	0.913293	0.0121809	1.01878	0.0127761	1.2e-05	0.0001652
1.14.19.56	0.00528114	0.000619261	0.00333134	0.000868442	0.00439934	0.000675992	0.00220554	0.000226307	0.00105722	0.000176843	0.00341912	0.000688419	1.202e-05	0.0001652
5.3.1.17	0.0051159	0.000792751	0.00259716	0.000572342	0.00349829	0.000649224	0.00306676	0.000674683	0.00683505	0.000719289	0.00181437	0.000462992	1.204e-05	0.0001652
1.1.1.308	0.0141981	0.00123421	0.012152	0.000698417	0.00896386	0.00114136	0.016576	0.00353707	0.0100283	0.000757915	0.00757398	0.000385802	1.205e-05	0.0001652
1.14.11.73	0.000515152	0.000241531	0.00303614	0.000853716	0.00226209	0.000552204	0.00158104	0.000457731	0.000798785	0.000225658	0.00145541	0.000104191	1.206e-05	0.0001652
2.4.1.302	0.000375842	8.13547e-05	0.000131363	8.13935e-05	0.000122132	6.68799e-05	1.27855e-05	1.17393e-05	0.000194573	8.4618e-05	0	0	1.206e-05	0.0001652
1.6.5.12	6.46769e-05	6.04595e-05	9.90127e-05	8.02565e-05	0.000176526	0.00011114	0.00344017	0.000722079	0.000601727	0.000257727	0.000499509	4.69965e-05	1.207e-05	0.0001652
1.18.1.3	0.047884	0.00141832	0.0405927	0.00165172	0.0453118	0.00371725	0.0387278	0.00375164	0.0334707	0.00263974	0.0541953	0.00268853	1.209e-05	0.0001652
3.1.1.24	0.191091	0.00483094	0.134381	0.00759814	0.148856	0.0190538	0.15378	0.0144634	0.168068	0.00568634	0.179226	0.00574406	1.214e-05	0.0001652
2.4.1.232	0.000784384	0.000173098	1.39295e-05	2.41265e-05	0.000152323	6.20819e-05	0.000309077	0.000134936	0.000965439	0.000262373	0.000317738	8.28067e-05	1.217e-05	0.0001652
2.6.1.86	0.00134467	0.000429194	0.000229481	7.70539e-05	0.00124257	0.00116929	3.26393e-05	2.68002e-05	0.000165274	9.26762e-05	0.000453699	9.9219e-05	1.222e-05	0.0001652
2.3.1.193	0.00126411	0.00036471	0.000483074	0.000202717	0.00189313	0.000808507	0.00275902	0.000432264	0.00679338	0.00220081	0.00334944	0.000513822	1.223e-05	0.0001652
3.1.26.4	0.0942137	0.00266566	0.10329	0.00481492	0.104086	0.00309174	0.0999984	0.00430521	0.110633	0.00348	0.116531	0.00523133	1.224e-05	0.0001652
3.1.3.64	0.00204811	0.000619837	0.00147365	0.000170812	0.00152688	0.000822813	0.000185348	0.000139041	0.000615535	9.99047e-05	0.00322762	0.000209429	1.23e-05	0.0001652
7.6.2.14	0.0170313	0.00114027	0.0119284	0.00152783	0.0135647	0.00123474	0.00815884	0.00336025	0.00440983	0.000464963	0.0104954	0.00223627	1.233e-05	0.0001652
2.3.1.51	0.156806	0.00565638	0.19959	0.0058582	0.175587	0.00545365	0.196481	0.0225553	0.20779	0.00506652	0.230663	0.00461982	1.236e-05	0.0001652
3.7.1.22	0.0222484	0.00170194	0.0200336	0.00107647	0.0193945	0.00227447	0.0129715	0.00313294	0.0101377	0.00118701	0.013934	0.000818757	1.236e-05	0.0001652
3.4.11.14	0.0196845	0.000732071	0.0222872	0.000830711	0.0133007	0.00277259	0.0174404	0.00134668	0.0176225	0.0018906	0.0115612	0.000675564	1.236e-05	0.0001652
3.1.1.27	0.00240616	0.000410402	0.00162789	0.000219581	0.000818282	0.0002974	0.000762147	0.00016635	0.00129099	0.000201588	0.00109692	0.000145548	1.236e-05	0.0001652
6.3.4.2	0.0901821	0.00314848	0.11702	0.00225557	0.106755	0.002185	0.10313	0.00749763	0.0860459	0.0026166	0.110688	0.00189997	1.238e-05	0.0001652
1.2.3.3	0.0119159	0.00104941	0.00577106	0.000207377	0.00657548	0.00119366	0.0211089	0.00567199	0.0114722	0.00114847	0.00627059	0.000446362	1.244e-05	0.0001652
5.1.3.17	0.00231375	0.000441752	0.00102138	8.76364e-05	0.000947431	0.000275193	0.000671112	0.000292413	0.00205156	0.000422099	0.000288396	0.000110092	1.249e-05	0.0001652
3.2.1.58	0.00541714	0.00060312	0.0130668	0.000355965	0.0204526	0.00535471	0.014607	0.00493048	0.00941622	0.000934632	0.0136792	0.00160897	1.253e-05	0.0001652
2.8.2.22	0.00839732	0.000926703	0.0036707	0.00026796	0.00588421	0.000403603	0.00722684	0.00137218	0.0117352	0.00125312	0.00539373	0.000450618	1.256e-05	0.0001652
1.14.13.24	0.0128801	0.00121328	0.00909031	0.00117111	0.00959213	0.000856423	0.00734148	0.000988443	0.00493084	0.000516424	0.00841852	0.00124138	1.261e-05	0.0001652
2.4.1.310	0.00317723	0.000342537	0.000675422	0.000182279	0.00175147	0.000594641	0.000674845	0.00035557	0.00330304	0.000186507	0.000935042	0.000128369	1.261e-05	0.0001652
1.2.1.28	0.00452829	0.000792924	0.00268758	0.000580707	0.00247881	0.000823615	0.000731967	0.000282498	0.00243794	0.000592733	0.00139386	0.000258715	1.264e-05	0.0001652
1.1.1.373	0.0011233	0.000205058	0.00142493	7.30843e-05	0.00181752	0.000203861	0.00319464	0.000575606	0.00210847	0.000432387	0.00258727	0.000360673	1.264e-05	0.0001652
1.1.3.43	0.00221405	0.000591944	0.00092978	0.000178555	0.000486746	0.00014996	0.000729436	0.000217319	0.000276514	0.000102653	0.000278017	0.000104565	1.27e-05	0.0001652
4.1.1.6	0.0276037	0.00354952	0.008736	0.000230722	0.00880259	0.00299129	0.0139199	0.00117468	0.0119897	0.00165976	0.00837477	0.000910932	1.271e-05	0.0001652
1.14.14.1	0.00518636	0.000557107	0.00226041	0.000574283	0.00364323	0.000656262	0.00408421	0.00052915	0.00206269	0.000705881	0.00292565	0.000384289	1.271e-05	0.0001652
3.2.1.24	0.0305202	0.00282428	0.0413708	0.00542089	0.061404	0.00798579	0.0441135	0.00891116	0.0622232	0.00661623	0.052735	0.0022713	1.273e-05	0.0001652
1.14.16.1	0.0080598	0.000948561	0.0121572	0.00123128	0.0165323	0.00381399	0.0109887	0.00153049	0.00985289	0.000508988	0.0126379	0.00125503	1.273e-05	0.0001652
1.3.1.33	0.0186882	0.00147618	0.00920532	0.000721649	0.0163469	0.00119686	0.0313708	0.00795061	0.0331784	0.00471681	0.0372092	0.00124881	1.278e-05	0.0001652
4.4.1.11	0.0209509	0.00176595	0.0437076	0.00589988	0.0357888	0.00470927	0.0265073	0.00257893	0.0305399	0.00313069	0.0282174	0.0013324	1.279e-05	0.0001652
1.7.1.17	0.0058635	0.000851509	0.0100237	0.000483671	0.0088513	0.00122182	0.0137801	0.00163523	0.0100192	0.00194368	0.0138741	0.00397711	1.281e-05	0.0001652
5.6.2.3	0.162886	0.00414919	0.185164	0.00435698	0.202899	0.0219959	0.192139	0.00229744	0.180872	0.0058928	0.204314	0.0022545	1.284e-05	0.0001652
2.2.1.9	0.0221545	0.00202727	0.0235558	0.000468504	0.0291694	0.00283729	0.0336992	0.0067653	0.0373983	0.00367739	0.0454912	0.0022096	1.287e-05	0.0001652
1.1.5.2	0.0923994	0.00963113	0.060927	0.00210167	0.0687142	0.0104178	0.0582894	0.0101677	0.046267	0.00475233	0.0431556	0.00244168	1.288e-05	0.0001652
2.1.1.349	0.00714591	0.000773413	0.00269063	0.000511912	0.00494972	0.000878194	0.00298719	0.00100159	0.00479586	0.000970126	0.0019522	0.000279291	1.288e-05	0.0001652
3.1.4.59	0.000102152	5.93653e-05	0.000935816	0.000132043	0.000356021	0.000202759	3.09104e-05	3.96276e-05	0.000435656	0.000272151	0.00219543	0.00097654	1.289e-05	0.0001652
3.6.4.6	0.00838223	0.000754157	0.0130124	0.000711054	0.0104335	0.00135964	0.0169936	0.00355327	0.0120989	0.000539748	0.0131439	0.000403668	1.292e-05	0.0001652
7.2.2.21	0.0489712	0.00247438	0.033931	0.00656099	0.0603915	0.0061577	0.0336073	0.00686006	0.038748	0.00393719	0.0471289	0.0021737	1.307e-05	0.0001652
7.2.2.12	0.0489712	0.00247438	0.033931	0.00656099	0.0603915	0.0061577	0.0336073	0.00686006	0.038748	0.00393719	0.0471289	0.0021737	1.307e-05	0.0001652
4.3.1.16	0.00902199	0.00106855	0.0141586	0.00197883	0.00717358	0.00105127	0.0114628	0.00129532	0.011768	0.000733778	0.0063675	0.000688144	1.307e-05	0.0001652
3.1.12.1	0.010919	0.000772127	0.00669772	0.0010099	0.0118614	0.000444019	0.00734816	0.000808286	0.00889657	0.000617213	0.00765941	0.000592943	1.314e-05	0.0001652
1.13.11.75	0.00580076	0.000453598	0.00323244	0.000793316	0.0053672	0.000883373	0.0119388	0.00161099	0.0080295	0.00145764	0.0073089	0.000383198	1.315e-05	0.0001652
3.4.11.5	0.0732899	0.00202712	0.0825959	0.00665495	0.0791598	0.00471199	0.0647436	0.002599	0.0689637	0.00100751	0.0766557	0.00137156	1.317e-05	0.0001652
2.4.99.16	0.0633689	0.00186345	0.0413424	0.00275103	0.0507849	0.00501706	0.05427	0.00301407	0.0554634	0.00214373	0.0604888	0.00108661	1.319e-05	0.0001652
1.2.7.10	0.00295997	0.00150174	0.000616816	0.000263976	0.000432959	0.000549285	5.9785e-05	9.33953e-05	1.53088e-06	3.74986e-06	6.16164e-06	1.01591e-05	1.321e-05	0.0001652
1.7.1.15	0.0236014	0.00338698	0.00179791	0.000283919	0.00797017	0.00479311	0.00180891	0.0010627	0.00112236	0.000291827	0.00497315	0.00327743	1.322e-05	0.0001652
2.5.1.101	0.0106926	0.000372448	0.00759733	0.000593352	0.00729778	0.000748998	0.00580672	0.00138925	0.00475579	0.000799577	0.00431269	0.00021315	1.323e-05	0.0001652
1.7.7.2	0.0169992	0.00122798	0.00897989	0.000459925	0.00876226	0.0019057	0.0116535	0.00403895	0.00474683	0.000466239	0.00601295	0.000484919	1.325e-05	0.0001652
2.3.1.180	0.0904343	0.00370628	0.115094	0.00523933	0.111938	0.00488651	0.0956664	0.00367915	0.0968421	0.0045299	0.0709536	0.00429739	1.327e-05	0.0001652
1.18.1.7	0.00159772	0.000229489	0.000610947	9.0591e-05	0.00171568	0.000369519	0.000639052	0.000318885	0.000152357	9.32416e-05	0.00089181	0.000169189	1.327e-05	0.0001652
3.4.21.94	0.000114008	7.16319e-05	0.000645265	0.000149377	0.000352605	7.0373e-05	8.90405e-05	0.000103299	3.91362e-06	9.58638e-06	0.000507653	8.84478e-05	1.332e-05	0.0001652
3.4.11.2	0.108635	0.00338795	0.132186	0.00130866	0.117638	0.0109629	0.134485	0.0046318	0.141998	0.00647048	0.151245	0.0033289	1.333e-05	0.0001652
3.1.1.74	0.00337933	0.00038686	0.000546038	0.000316451	0.00157048	0.000770846	0.000661594	0.000271666	0.000576266	0.000132963	0.00407193	0.000499777	1.337e-05	0.0001652
1.3.1.89	0.00155842	0.00032601	0.0013196	0.000353078	0.000639245	0.000272735	0.000151413	9.00709e-05	0.000349289	9.53308e-05	0.000253392	6.86034e-05	1.338e-05	0.0001652
4.1.99.2	0.0242333	0.0025012	0.0601672	0.00150475	0.0461341	0.00355166	0.0389879	0.00375906	0.0358332	0.00185738	0.0386146	0.00253441	1.341e-05	0.0001652
3.1.11.1	0.00383633	0.000502609	0.00624591	0.000914005	0.00533318	0.00110265	0.0093538	0.00157016	0.0125086	0.00246482	0.00987833	0.00153357	1.345e-05	0.0001652
4.2.99.18	0.137762	0.00223571	0.13889	0.00500234	0.14665	0.00443452	0.16172	0.00676122	0.168683	0.00405084	0.172502	0.00359909	1.346e-05	0.0001652
1.8.1.8	0.0130963	0.000965971	0.016119	0.00142324	0.0182889	0.001048	0.0178191	0.0039741	0.0262928	0.000442983	0.0318656	0.00286063	1.347e-05	0.0001652
1.3.5.6	0.000824399	0.000131293	0.000670867	0.00013258	0.000982076	0.000150343	0.00364214	0.000627043	0.00148784	0.000365116	0.00122667	0.000120849	1.355e-05	0.0001652
3.2.1.3	0.0203117	0.000809001	0.0142195	0.00119107	0.0198699	0.00309583	0.0106307	0.00147413	0.0144994	0.000974601	0.0129392	0.000740601	1.357e-05	0.0001652
2.7.2.3	0.0571199	0.00121057	0.06812	0.00160817	0.0678075	0.00281243	0.0627091	0.00187689	0.0617859	0.00229641	0.0641941	0.000813973	1.36e-05	0.0001652
2.1.1.200	0.00422754	0.00055893	0.00719243	0.000263058	0.00512299	0.000865268	0.00940114	0.00131418	0.011032	0.00167696	0.00891548	0.00113959	1.369e-05	0.0001652
1.3.1.24	0.00679862	0.000599073	0.00438129	0.000279195	0.00736367	0.000671794	0.0121066	0.00183084	0.0103226	0.000847245	0.0100649	0.000626216	1.379e-05	0.0001652
2.1.1.184	0.00109049	0.000205524	0.000586597	0.000291411	0.00130257	0.000237794	0.000231797	0.000237047	0.000280116	0.000108652	0.00162737	0.000178121	1.392e-05	0.0001652
2.1.1.161	2.90141e-05	3.01017e-05	0	0	2.64233e-06	6.47235e-06	0.000604739	0.000138399	0.000137615	0.000112909	6.01734e-05	1.71341e-05	1.402e-05	0.0001652
1.12.98.1	0.0154187	0.00060354	0.0190604	0.00059554	0.0184716	0.000866545	0.0221428	0.00145632	0.0185642	0.000771053	0.0198073	0.0007281	1.408e-05	0.0001652
4.4.1.19	0.00554026	0.00100403	0.00314044	0.000456562	0.00347902	0.00047834	0.00233643	0.000590701	0.00385027	0.000548773	0.00240281	0.000384834	1.409e-05	0.0001652
4.1.1.5	0.00616399	0.000538683	0.00229171	0.000322723	0.00481394	0.000537815	0.00317126	0.000542957	0.0048714	0.000807892	0.00308799	0.000522994	1.418e-05	0.0001652
3.5.1.54	0.0141553	0.00159145	0.00533151	0.00103951	0.00834103	0.00133736	0.00466623	0.00102691	0.00494835	0.00100795	0.0108377	0.00248401	1.419e-05	0.0001652
1.1.1.291	0.00342833	0.000259085	0.000604283	6.82561e-05	0.000920259	0.000318575	0.00090197	0.000312938	0.00195805	0.000950079	0.000323391	0.000139626	1.422e-05	0.0001652
2.3.1.179	0.143986	0.00319061	0.117264	0.00266033	0.133264	0.00476295	0.121647	0.0109831	0.115975	0.00268218	0.101427	0.00322154	1.423e-05	0.0001652
1.14.15.36	0.00585417	0.000747428	0.00311156	0.000333551	0.0078693	0.000869169	0.00474036	0.000820127	0.00329815	0.000596886	0.00690671	0.000528733	1.426e-05	0.0001652
1.14.14.154	0.00585417	0.000747428	0.00311156	0.000333551	0.0078693	0.000869169	0.00474036	0.000820127	0.00329815	0.000596886	0.00690671	0.000528733	1.426e-05	0.0001652
4.2.1.79	0.0324248	0.00252372	0.0256951	0.00234859	0.0209308	0.00196966	0.0218971	0.0028203	0.0189992	0.00126817	0.0163403	0.00150331	1.429e-05	0.0001652
3.4.22.37	0.00165036	0.000193043	0.00121942	0.000300284	0.00374377	0.00242215	0.000986649	0.000177786	0.00438693	0.00241861	0.00111334	0.000173219	1.429e-05	0.0001652
3.1.3.78	0.000139565	6.82896e-05	1.17307e-05	1.28463e-06	6.06744e-05	6.50342e-05	0	0	0	0	1.27309e-06	3.11843e-06	1.429e-05	0.0001652
3.2.1.41	0.0392904	0.0047561	0.0348051	0.00363114	0.0675949	0.00801155	0.0629868	0.00877832	0.0631547	0.00460794	0.0784609	0.00126594	1.437e-05	0.0001652
3.2.1.37	0.0354616	0.00297086	0.0228049	0.0016779	0.0348131	0.00409264	0.0235259	0.0046212	0.0491118	0.00353805	0.0252466	0.0017787	1.439e-05	0.0001652
4.2.3.2	0.0162257	0.000903259	0.0232954	0.00195509	0.0178264	0.0017148	0.0258485	0.00207803	0.0192274	0.000913289	0.0235651	0.000928612	1.443e-05	0.0001652
5.1.3.15	0.011319	0.00100972	0.00944825	0.00248797	0.0136073	0.00059888	0.0158698	0.00272867	0.0201681	0.00372219	0.0236706	0.00183403	1.448e-05	0.0001652
2.3.1.261	0.00229228	0.000443012	0.000334907	0.000129378	0.00179851	0.000466286	0.00097608	6.67955e-05	0.000616362	0.000208236	0.000712244	0.000106351	1.451e-05	0.0001652
4.1.1.45	0.0583094	0.00668295	0.0237729	0.00336475	0.0231465	0.00582803	0.0159036	0.00464631	0.0115314	0.00129851	0.0124489	0.000766354	1.452e-05	0.0001652
2.1.2.1	0.0869491	0.00208759	0.0992106	0.00175234	0.0995775	0.00348767	0.0926678	0.00339674	0.0851981	0.00261221	0.101569	0.00191265	1.454e-05	0.0001652
5.6.2.4	1.00633	0.0118707	1.00133	0.0104163	1.11239	0.0335055	1.09897	0.0285786	1.08401	0.0226777	1.18177	0.0151682	1.455e-05	0.0001652
3.6.1.62	0.0095872	0.000570364	0.00711248	0.00125477	0.00841066	0.00109753	0.0129751	0.00194712	0.0151127	0.00154998	0.0130173	0.00127458	1.456e-05	0.0001652
6.2.1.8	0.0210056	0.00201358	0.0171687	0.00245617	0.0126579	0.00242982	0.0126976	0.00211837	0.00891972	0.000868024	0.0102396	0.000900759	1.46e-05	0.0001652
1.14.13.113	0.00892479	0.00103728	0.00300538	0.000309087	0.00429947	0.00140364	0.00505209	0.00172103	0.00321499	0.00028954	0.00214893	0.000266149	1.462e-05	0.0001652
2.6.1.44	0.069424	0.00323471	0.0673031	0.00244265	0.0615458	0.00258221	0.0667972	0.00337294	0.0567136	0.00226175	0.0477262	0.00320388	1.463e-05	0.0001652
4.1.1.79	0.0174136	0.0024445	0.010181	0.000395957	0.0101694	0.00129065	0.0109797	0.00252628	0.00699471	0.000746356	0.00887201	0.000282721	1.463e-05	0.0001652
3.1.1.117	0.0558216	0.00468884	0.0430232	0.00834004	0.0541047	0.0035163	0.0345233	0.00492228	0.0780158	0.0104255	0.0321846	0.00318448	1.464e-05	0.0001652
1.5.1.7	0.025253	0.00188219	0.0461813	0.00405392	0.0426544	0.00771768	0.0303554	0.00307282	0.036932	0.00334324	0.0485258	0.00144317	1.467e-05	0.0001652
4.1.1.15	0.0258062	0.00162116	0.0100328	0.00449486	0.0157003	0.00199439	0.0289124	0.00411175	0.0334715	0.00236877	0.0359768	0.00184558	1.468e-05	0.0001652
3.5.4.16	0.0657906	0.00231436	0.0881955	0.00370957	0.0831633	0.00862839	0.0679822	0.00352751	0.0737594	0.00186516	0.08236	0.00194689	1.469e-05	0.0001652
2.7.4.8	0.0406842	0.00182334	0.0521905	0.00186168	0.0463763	0.00303795	0.0454012	0.00310939	0.0510299	0.00187319	0.0566269	0.00182268	1.473e-05	0.0001652
1.1.1.195	0.024897	0.00164867	0.0158202	0.000732789	0.0168888	0.00197501	0.0167268	0.00237454	0.0196724	0.00234328	0.0124521	0.000648358	1.48e-05	0.0001652
1.4.99.6	0.00920298	0.000498908	0.0170441	0.00196598	0.0131461	0.00172294	0.010887	0.00164944	0.00829504	0.00141559	0.0214364	0.00115888	1.48e-05	0.0001652
3.1.26.12	0.0601019	0.00277532	0.0720323	0.00224905	0.0669249	0.0039888	0.0715361	0.00537384	0.0598604	0.0035008	0.0846314	0.00183025	1.481e-05	0.0001652
3.1.1.41	0.0095191	0.00108981	0.00355079	0.00077286	0.00852994	0.000957826	0.00543245	0.00141793	0.0112135	0.00120189	0.0071477	0.0008682	1.482e-05	0.0001652
1.2.1.107	0.00373052	0.00051813	0.00533499	0.00240966	0.00656027	0.000567163	0.011202	0.00151729	0.0128673	0.00294	0.00619153	0.000455404	1.482e-05	0.0001652
2.3.1.231	0.00069015	0.000158213	0.00355614	0.00033183	0.00202873	0.000332545	0.00208188	0.000576445	0.00160928	0.000214769	0.00080042	0.000148728	1.484e-05	0.0001652
2.1.1.290	0.00069015	0.000158213	0.00355614	0.00033183	0.00202873	0.000332545	0.00208188	0.000576445	0.00160928	0.000214769	0.00080042	0.000148728	1.484e-05	0.0001652
4.3.1.12	0.00190814	0.000489526	0.00528516	0.00125607	0.0073718	0.000971143	0.00256138	0.0015511	0.00100609	0.000362103	0.00588842	0.000540847	1.485e-05	0.0001652
1.3.1.9	0.0675848	0.00277701	0.0620478	0.00122169	0.0647255	0.00373911	0.0583001	0.002213	0.0542412	0.00145699	0.0571764	0.00197648	1.488e-05	0.0001652
2.6.1.123	0.00472065	0.000493978	0.010623	0.00130381	0.00805122	0.000806238	0.0097794	0.00130593	0.00612451	0.00106068	0.00792744	0.000384344	1.49e-05	0.0001652
2.1.1.71	0.0488069	0.00212875	0.0371971	0.00125633	0.0380684	0.00203863	0.0350324	0.00233177	0.0326881	0.000851394	0.0394255	0.00161709	1.498e-05	0.0001652
1.21.1.1	0.0192965	0.00114178	0.0254042	0.000153303	0.0242117	0.00100973	0.0236009	0.00274508	0.0276151	0.00163442	0.0203804	0.000850692	1.498e-05	0.0001652
7.5.2.9	0.011895	0.00181314	0.00303821	0.000907526	0.00666074	0.00122746	0.00486133	0.00130276	0.0108178	0.0011826	0.00491426	0.000238681	1.499e-05	0.0001652
6.1.1.14	0.130218	0.00156831	0.170368	0.00277966	0.15277	0.00781867	0.154771	0.00652468	0.136538	0.00253741	0.152633	0.00411064	1.504e-05	0.0001652
2.7.1.194	0.000144582	8.0707e-05	0.000888881	0.000103196	0.00155064	0.000436147	0.00139921	0.000369376	0.00170414	0.000460934	0.0079075	0.00103194	1.507e-05	0.0001652
2.4.1.18	0.117547	0.0017083	0.106835	0.000770687	0.118969	0.00547615	0.133653	0.00768334	0.130348	0.00528464	0.143069	0.00329704	1.508e-05	0.0001652
1.1.1.275	0.0108482	0.00117029	0.000418266	0.000109459	0.0030163	0.00135303	0.00214043	0.000445305	0.00437957	0.000768254	0.00400456	0.000353342	1.511e-05	0.0001652
1.14.15.17	5.30103e-05	6.05125e-05	0	0	4.44003e-05	4.46782e-05	0.00277964	0.00122494	0.000346114	0.000165001	0.00020291	8.97943e-05	1.514e-05	0.0001652
1.2.1.26	0.0126005	0.00133356	0.0162827	0.00218096	0.0127014	0.00139767	0.00895465	0.00152797	0.00887819	0.000426823	0.00719447	0.00062694	1.516e-05	0.0001652
2.1.1.196	0.0128544	0.000863365	0.00820073	0.000886933	0.0107112	0.00123106	0.0145761	0.00177466	0.00767211	0.000795235	0.00740548	0.000483776	1.519e-05	0.0001652
1.3.2.3	0	0	0.000139959	8.85109e-05	4.79481e-06	1.17448e-05	5.65007e-06	8.80163e-06	8.53698e-05	3.17591e-05	7.57092e-05	3.31944e-05	1.529e-05	0.0001652
2.5.1.153	0.00107092	0.000321391	0.000708221	0.000149203	0.00136348	0.000292617	0.00022179	0.000142112	0.000196222	0.00012241	0.000610331	0.00011949	1.531e-05	0.0001652
1.13.99.1	0.00322255	0.000583415	0.000875008	0.00049847	0.00228672	0.000404719	0.00147542	0.000215176	0.00106529	0.00016131	0.00106343	0.000245671	1.537e-05	0.0001652
2.3.1.7	0.00391463	0.000390836	0.000909746	0.000278644	0.00116703	0.000478794	0.00283798	0.000718056	0.00303948	0.000287457	0.000962691	0.000263617	1.543e-05	0.0001652
5.3.99.11	0.00919696	0.00071897	0.00767981	0.000377471	0.00794218	0.00135538	0.0043747	0.00107558	0.00601713	0.000668491	0.00517888	0.00021762	1.544e-05	0.0001652
7.1.1.1	0.117688	0.00521363	0.162062	0.00739502	0.129954	0.00482196	0.144088	0.0140081	0.112781	0.00513384	0.15301	0.00422148	1.545e-05	0.0001652
2.3.1.42	0.00578472	0.000506438	0.00486284	0.00080405	0.00461764	0.000571693	0.00968277	0.0013749	0.010634	0.00114867	0.00868869	0.000573431	1.547e-05	0.0001652
1.8.1.4	0.148289	0.00316905	0.158405	0.00159791	0.166015	0.00566079	0.172556	0.00774188	0.164675	0.003253	0.156653	0.00400085	1.553e-05	0.0001652
1.14.13.114	0.00511585	0.000415176	0.00137182	0.000311584	0.00246635	0.000626446	0.00242631	0.000233585	0.00188293	0.000419564	0.00121888	0.000203111	1.562e-05	0.0001652
2.7.7.6	0.557179	0.0193492	0.751468	0.0183468	0.662286	0.0192181	0.710033	0.0923018	0.522043	0.0165447	0.689897	0.00602096	1.563e-05	0.0001652
1.14.14.22	0.00251678	0.000498329	0.000439398	0.000123187	0.000968439	0.000278002	0.00151722	0.000279569	0.00141759	0.000333152	0.000939244	0.000168252	1.563e-05	0.0001652
2.1.1.17	0.0487164	0.00208536	0.0371971	0.00125633	0.0380035	0.00222096	0.0348229	0.00237037	0.0325695	0.000877432	0.0394255	0.00161709	1.574e-05	0.0001652
3.4.21.50	0.009026	0.00120458	0.0120262	0.00131526	0.022013	0.0041443	0.00971963	0.000775606	0.0223405	0.00412714	0.0116353	0.000943175	1.579e-05	0.0001652
1.1.1.408	0.00769826	0.000716855	0.0066768	0.000479277	0.00701259	0.00064286	0.00485936	0.00104362	0.00929058	0.000864141	0.00477476	0.000575576	1.581e-05	0.0001652
1.1.1.409	0.00769826	0.000716855	0.0066768	0.000479277	0.00701259	0.00064286	0.00485936	0.00104362	0.00929058	0.000864141	0.00477476	0.000575576	1.581e-05	0.0001652
4.3.2.10	0.0750657	0.00209823	0.0840811	0.00105467	0.0839668	0.00335349	0.0829582	0.00361411	0.0790426	0.00126249	0.0910036	0.00143464	1.584e-05	0.0001652
1.1.1.283	0.00939921	0.0013824	0.00458088	0.000369257	0.00790926	0.000590475	0.00957649	0.00108873	0.0230802	0.00298555	0.00575711	0.00106442	1.586e-05	0.0001652
3.5.1.97	0.0229011	0.00164798	0.0366386	0.00155888	0.0279983	0.00147194	0.0359832	0.00291832	0.0266139	0.00372219	0.0214751	0.00167875	1.597e-05	0.0001652
3.4.11.19	0.0412832	0.00202413	0.0553576	0.00254714	0.0458649	0.0038352	0.0346418	0.00280786	0.0367503	0.000737095	0.0445571	0.00117613	1.6e-05	0.0001652
6.3.4.6	0.0109446	0.00176376	0.00642132	0.00116012	0.0089891	0.00161793	0.00477412	0.000814101	0.00705087	0.000995146	0.0130264	0.0016953	1.6e-05	0.0001652
2.1.1.298	0.00574084	0.000306227	0.0157382	0.00137151	0.00903001	0.00115243	0.0106244	0.00123747	0.0120068	0.0021767	0.0125232	0.000463489	1.604e-05	0.0001652
2.5.1.18	0.19651	0.0173997	0.165663	0.0162682	0.150027	0.00730352	0.163232	0.0260119	0.107722	0.0132148	0.124198	0.00649866	1.607e-05	0.0001652
2.4.1.25	0.0846344	0.00129845	0.0765547	0.00240768	0.0792134	0.00338767	0.07764	0.00390658	0.0867837	0.00300812	0.094827	0.00366014	1.618e-05	0.0001652
2.1.1.33	0.0256121	0.0024079	0.0341979	0.00100282	0.0343003	0.0044438	0.0332174	0.00399989	0.038457	0.00125143	0.0443808	0.000719563	1.619e-05	0.0001652
2.7.4.2	0.00220301	0.0003816	0.00446418	0.000279829	0.00337545	0.00123621	0.00734181	0.00194931	0.00382236	0.000575294	0.00172645	0.000349349	1.621e-05	0.0001652
3.13.1.1	0.00550932	0.000377693	0.00437385	0.000607364	0.00430787	0.000366262	0.00865426	0.00132623	0.00660538	0.00158241	0.00417223	0.000627588	1.624e-05	0.0001652
3.5.3.18	0.0133915	0.000892071	0.0220708	0.002153	0.0196026	0.00100622	0.014264	0.00165915	0.0170821	0.000744015	0.0171499	0.00134713	1.638e-05	0.0001652
2.1.1.350	0.00323181	0.000640212	0.0108181	0.00129627	0.0110162	0.00198605	0.00865444	0.0012965	0.00890304	0.000654829	0.0149177	0.000896514	1.643e-05	0.0001652
1.4.4.2	0.14048	0.00152915	0.164857	0.00495906	0.159737	0.00489275	0.167202	0.00545051	0.149796	0.001616	0.160585	0.0042506	1.644e-05	0.0001652
3.1.7.2	0.119281	0.00288002	0.142689	0.00207398	0.13421	0.00431408	0.135762	0.00288203	0.129915	0.00307673	0.138831	0.00238686	1.65e-05	0.0001652
2.6.1.16	0.127235	0.00312333	0.135372	0.00288724	0.141849	0.00395598	0.124539	0.0032157	0.121958	0.00292183	0.135221	0.00273802	1.65e-05	0.0001652
2.3.1.288	0.000145109	9.46503e-05	0	0	1.58626e-05	2.67048e-05	0	0	0	0	0	0	1.654e-05	0.0001652
1.14.13.127	0.0357157	0.00291606	0.01922	0.00104625	0.021644	0.00260244	0.0171548	0.00244913	0.0137541	0.00196968	0.0186988	0.00213398	1.667e-05	0.0001652
6.2.1.71	0.00798362	0.000455187	0.00403301	0.000186255	0.00213122	0.000855665	0.00492936	0.00171351	0.00428597	0.000369896	0.00240696	0.000256895	1.667e-05	0.0001652
6.1.1.3	0.10637	0.00266085	0.123801	0.00384215	0.115735	0.00261565	0.116605	0.00710259	0.100987	0.0024565	0.125268	0.00235898	1.67e-05	0.0001652
1.1.1.88	0.0148339	0.000785026	0.0257378	0.00208153	0.0232701	0.00407392	0.0218025	0.0028169	0.0189501	0.00113896	0.0131358	0.000980849	1.67e-05	0.0001652
1.3.99.41	0.06203	0.00383613	0.08148	0.00532531	0.0725126	0.0017501	0.0772379	0.00636316	0.0571458	0.00270634	0.0824436	0.00357197	1.682e-05	0.0001652
5.4.99.26	0.00227327	0.000311455	0.00314532	0.000780874	0.00644622	0.000911754	0.00354364	0.000912046	0.00713567	0.000760507	0.0064924	0.000584637	1.682e-05	0.0001652
1.1.5.5	0.0169586	0.00112433	0.0158997	0.00131923	0.0183271	0.00177516	0.0112179	0.00136154	0.00992204	0.000788602	0.0120724	0.000905978	1.691e-05	0.0001652
4.1.1.4	0.00326474	0.000527701	0.00413519	0.000135371	0.00204441	0.000596993	0.00400903	0.000671554	0.00553951	0.000827646	0.00529161	0.000484643	1.695e-05	0.0001652
4.1.1.32	0.0497078	0.00191946	0.0548814	0.00284579	0.0520802	0.00244552	0.0615618	0.00378803	0.0598826	0.00409947	0.0777982	0.00242943	1.698e-05	0.0001652
1.13.11.2	0.057553	0.00208307	0.0269974	0.00267195	0.0364756	0.00488781	0.0221429	0.00113885	0.031068	0.00536357	0.0302202	0.00099264	1.698e-05	0.0001652
7.2.2.17	0.0026932	0.0005835	0.000704772	7.86657e-05	0.00188266	0.000841619	0.000450255	0.000259949	0.000732733	0.000151557	0.00129142	0.000306506	1.7e-05	0.0001652
2.1.1.276	0.00196181	0.000365941	0.000636503	0.000462134	0.00037695	0.000245636	0.000925052	0.000281797	0.00137055	0.000186156	0.000328472	0.000133335	1.705e-05	0.0001652
2.7.1.64	0.00361202	0.000293759	0.002136	0.00032998	0.00395688	0.000503868	0.0018568	0.000632179	0.00214087	0.000402029	0.00280489	0.000210202	1.718e-05	0.0001652
6.2.1.26	0.0166474	0.00144221	0.0219848	0.00114316	0.0226057	0.00261045	0.0237261	0.00493088	0.0272201	0.00208996	0.03513	0.000987619	1.722e-05	0.0001652
3.4.11.1	0.0774291	0.00154671	0.0854967	0.00260397	0.0850461	0.00266101	0.0945993	0.00617042	0.0771447	0.00611764	0.0944689	0.0023917	1.726e-05	0.0001652
1.14.11.57	0.00588168	0.00110899	0.00208004	0.000134436	0.00290744	0.000613128	0.00516727	0.00249338	0.00162448	0.000324856	0.00210852	0.000299026	1.729e-05	0.0001652
6.3.4.3	0.0532464	0.00173349	0.0782422	0.00150344	0.0623761	0.00180653	0.0661011	0.007536	0.0558212	0.00182553	0.0603811	0.00154589	1.731e-05	0.0001652
1.14.15.20	0.00130446	0.000275384	0.000417002	0.000316184	0.000619882	0.000140886	0.00402402	0.0011535	0.00184226	0.000339619	0.0014264	0.000256648	1.74e-05	0.0001652
2.1.1.143	0.000398663	0.000122531	3.14384e-05	4.03314e-05	0.000176182	6.06715e-05	0.000138334	7.74744e-05	0.000373297	0.000105496	3.71456e-05	2.74665e-05	1.743e-05	0.0001652
2.3.1.275	0.0429106	0.00149429	0.0563192	0.00163611	0.0536291	0.00396428	0.0512043	0.00612457	0.0593333	0.00211627	0.0609139	0.00171659	1.752e-05	0.0001652
2.3.1.176	0.00726518	0.000844119	0.00666413	0.000435437	0.00531603	0.00120789	0.00331082	0.00114229	0.00261304	0.000403523	0.00212508	0.000274021	1.753e-05	0.0001652
1.4.3.13	0.00108917	0.000220184	9.34648e-05	3.41095e-05	0.000442532	0.000167871	0.000164101	0.000118569	5.50007e-05	5.71868e-05	0.000229069	6.4527e-05	1.757e-05	0.0001652
6.2.1.34	0.0146831	0.00132215	0.0087464	0.000130103	0.00722779	0.00113535	0.00366071	0.00153086	0.00531066	0.00122846	0.00489558	0.000734553	1.759e-05	0.0001652
6.3.5.12	0.00010958	9.55801e-05	0.000181315	2.47872e-05	0.0019006	0.00111423	1.42115e-05	3.48109e-05	2.64659e-06	6.48279e-06	0.000207942	0.000113736	1.762e-05	0.0001652
1.5.1.50	3.59106e-05	2.97069e-05	0.000126328	6.17168e-05	0.000115695	0.000112375	0.00120585	0.000399038	0.000656185	0.000299465	0.000489032	0.000188573	1.765e-05	0.0001652
1.3.1.85	0.0205304	0.00129306	0.017442	0.000620015	0.0149535	0.00152448	0.0198675	0.00198368	0.0121889	0.00101952	0.0187707	0.000461324	1.768e-05	0.0001652
2.7.7.8	0.111638	0.00195318	0.137372	0.00196787	0.127657	0.00461731	0.127597	0.00937638	0.104772	0.0028752	0.132054	0.00227015	1.77e-05	0.0001652
2.1.1.274	0.00299295	0.000548781	0.000353003	9.56717e-05	0.000613458	0.000258501	0.00104693	0.000104104	0.00107919	0.000164051	0.000914235	9.83193e-05	1.776e-05	0.0001652
3.1.21.3	0.0386414	0.00453955	0.0493572	0.0122906	0.0936829	0.0288826	0.0449002	0.00684347	0.087095	0.0098361	0.120199	0.0120955	1.779e-05	0.0001652
2.7.1.119	0.00114612	0.000245697	0.00101652	8.31291e-05	0.00223768	0.000717436	0.00183486	0.000514795	0.00389359	0.000533067	0.002921	0.000487461	1.781e-05	0.0001652
1.17.1.8	0.0575737	0.00284383	0.0463559	0.00200883	0.0440951	0.00263071	0.0498873	0.00108677	0.053916	0.00241256	0.0534874	0.00140887	1.787e-05	0.0001652
1.14.11.56	0.000119269	7.36e-05	0	0	8.59004e-05	9.74517e-05	0	0	0	0	0	0	1.787e-05	0.0001652
4.2.2.10	0.00127129	0.000453845	0	0	0.00013199	0.0001567	0	0	0.000167087	0.000182475	0	0	1.792e-05	0.0001652
2.2.1.7	0.0612318	0.00161928	0.067699	0.0041927	0.0725902	0.00415938	0.0741616	0.00387166	0.0683279	0.00346492	0.0846309	0.00227612	1.8e-05	0.0001652
4.2.1.107	0.0453403	0.00258934	0.0289511	0.00159861	0.0299375	0.00518314	0.0400845	0.00209353	0.0399576	0.00286767	0.0306222	0.00133615	1.804e-05	0.0001652
3.1.1.96	0.026868	0.00183555	0.035683	0.00113652	0.0343264	0.0025073	0.0314183	0.00274622	0.0393599	0.00133062	0.0388431	0.0015319	1.805e-05	0.0001652
2.4.2.12	0.00323993	0.000321416	0.00116804	0.000575566	0.00185495	0.00056887	0.000994349	0.000820073	0.000132964	4.51703e-05	0.000935348	0.000340239	1.808e-05	0.0001652
3.4.15.5	0.0285002	0.00202925	0.0540362	0.00224972	0.0498081	0.00602675	0.0370946	0.00418722	0.0382857	0.00422883	0.0362319	0.00191999	1.812e-05	0.0001652
2.1.1.322	0.000215734	0.000108265	8.59086e-06	1.48798e-05	6.09426e-05	6.2684e-05	1.52328e-05	1.98667e-05	0	0	0	0	1.818e-05	0.0001652
3.6.1.52	0.00170998	0.000135411	0.000508676	0.00031707	0.000629795	0.000245124	0.00121034	0.000330082	0.00115446	0.000168817	0.000521691	0.000161173	1.819e-05	0.0001652
1.14.14.17	0.0015012	0.000353002	0.000342256	0.000121118	0.000963397	0.000392933	0.00186825	0.000259496	0.0022121	0.000258244	0.000506749	0.000135754	1.82e-05	0.0001652
1.3.99.33	0.00756444	0.00119559	0.00273395	0.000355439	0.00457966	0.00102763	0.00455191	0.00045207	0.00599306	0.00120352	0.00296371	0.000409552	1.821e-05	0.0001652
3.5.5.1	0.025565	0.00122723	0.0314842	0.00313898	0.0187491	0.00214451	0.030839	0.00379412	0.0299471	0.00242609	0.020917	0.00178882	1.825e-05	0.0001652
1.1.1.69	0.0324569	0.00171527	0.0244899	0.000414906	0.0241804	0.00278925	0.0229538	0.00102985	0.025664	0.0015349	0.0193376	0.000212062	1.828e-05	0.0001652
3.1.1.73	0.0184974	0.00179213	0.0462186	0.00449741	0.00721505	0.00179833	0.00762036	0.00187828	0.0114818	0.00120584	0.00693983	0.00070872	1.828e-05	0.0001652
3.5.3.6	0.0179871	0.00185179	0.0297214	0.00110098	0.0318809	0.00297397	0.0261214	0.00450219	0.0306847	0.00106278	0.0472435	0.00253475	1.83e-05	0.0001652
1.1.1.413	0.010074	0.000170309	0.00515303	0.00040967	0.00699404	0.000719384	0.00803812	0.00133533	0.0105306	0.0012394	0.00616988	0.000345439	1.848e-05	0.0001652
1.14.19.9	0.0155201	0.00241969	0.0336204	0.00171717	0.0220856	0.00354303	0.036298	0.00821184	0.0262654	0.00410492	0.0143272	0.00196152	1.851e-05	0.0001652
6.3.5.13	0.0106818	0.00147724	0.00606028	0.000312163	0.00859815	0.00176473	0.0139469	0.00360179	0.0137073	0.00138717	0.0319697	0.00204572	1.855e-05	0.0001652
2.3.1.252	0.000683673	0.000175502	0.000130874	9.32636e-05	9.77475e-05	0.000101103	3.47265e-05	5.26169e-05	0.000141687	8.27331e-05	0.00180315	0.000298026	1.855e-05	0.0001652
3.4.21.106	0	0	0	0	7.6809e-05	6.743e-05	0	0	0	0	5.27736e-05	2.93027e-05	1.859e-05	0.0001652
1.1.1.95	0.168054	0.00261255	0.165588	0.00138053	0.160926	0.0034066	0.146587	0.00366057	0.142983	0.00266293	0.145868	0.00535156	1.865e-05	0.0001652
1.1.1.399	0.168054	0.00261255	0.165588	0.00138053	0.160926	0.0034066	0.146587	0.00366057	0.142983	0.00266293	0.145868	0.00535156	1.865e-05	0.0001652
2.7.1.20	0.0152668	0.0013107	0.0244648	0.000303437	0.0223513	0.00146617	0.0184524	0.00300729	0.0173297	0.00151682	0.02675	0.00166363	1.865e-05	0.0001652
4.2.1.56	0.027054	0.0016491	0.0186195	0.00119291	0.020118	0.00185268	0.0214527	0.00305697	0.0150351	0.00156603	0.0262828	0.000597902	1.866e-05	0.0001652
3.1.2.25	0.00634298	0.000965834	0.00751904	0.000664278	0.00390817	0.000649577	0.00245116	0.0015143	0.00116754	0.000152135	0.00147126	0.000533394	1.875e-05	0.0001652
1.17.5.1	0.00634298	0.000965834	0.00751904	0.000664278	0.00390817	0.000649577	0.00245116	0.0015143	0.00116754	0.000152135	0.00147126	0.000533394	1.875e-05	0.0001652
1.7.1.4	0.0296609	0.00164126	0.0194793	0.00222354	0.0235498	0.00291382	0.0151814	0.00149887	0.020881	0.00238051	0.0196108	0.00162069	1.886e-05	0.0001652
3.1.1.115	0.00744571	0.000422204	0.00413806	0.000464516	0.00742222	0.00153597	0.00314733	0.000612964	0.0037789	0.000646697	0.00455084	0.000161112	1.889e-05	0.0001652
2.4.1.359	0.00031526	0.000184325	0.00031129	0.000217043	0.000343873	0.00028454	0	0	4.23689e-06	1.03782e-05	0	0	1.893e-05	0.0001652
3.4.14.1	0.000721261	0.000228896	0.000717755	9.93323e-05	0.00181026	0.000572598	0.00174828	0.000635999	0.00346771	0.000366672	0.00148486	0.000179246	1.898e-05	0.0001652
2.7.2.7	0.000528477	0.000437471	0.00294554	0.000164999	0.00421845	0.0033578	0.00187371	0.000661693	0.00804493	0.00236437	0.00310389	0.000336449	1.9e-05	0.0001652
2.7.1.51	0.00410521	0.000850391	0.00574816	0.000815862	0.00355635	0.000819788	0.00208877	0.000321771	0.00657469	0.00048433	0.00252745	0.000400525	1.901e-05	0.0001652
4.2.3.154	0	0	0	0	0	0	0.00110085	0.000870135	8.08406e-06	9.01741e-06	0	0	1.901e-05	0.0001652
2.1.1.208	0.000445628	0.00012482	0.000670022	0.000238619	0.00062542	0.000105253	0.000807228	0.000187928	0.00165569	0.000192385	0.00248459	0.000291354	1.902e-05	0.0001652
2.4.1.319	0.00583157	0.000654198	0.00277497	0.000763134	0.00466214	0.000354941	0.00347265	0.00124252	0.00771296	0.00135355	0.00373095	0.000159944	1.904e-05	0.0001652
4.2.1.81	0.00781056	0.000920189	0.00286444	0.000341517	0.00448601	0.000671687	0.00367588	0.000608955	0.003044	0.000289844	0.00264708	0.000555478	1.904e-05	0.0001652
2.4.1.320	0.00583157	0.000654198	0.00277497	0.000763134	0.00466214	0.000354941	0.00347265	0.00124252	0.00771296	0.00135355	0.00373095	0.000159944	1.904e-05	0.0001652
2.5.1.29	0.0504983	0.00230115	0.0464092	0.00448074	0.053092	0.00353512	0.0601802	0.00302611	0.0654916	0.000924282	0.0569304	0.00117919	1.907e-05	0.0001652
3.5.1.46	0.0394154	0.00159876	0.0217559	0.000110906	0.0251101	0.00291955	0.0348239	0.00219036	0.0343254	0.00347796	0.0320964	0.000962993	1.911e-05	0.0001652
1.6.3.5	0.0102964	0.000925549	0.0164196	0.00131281	0.0192762	0.00344761	0.0296359	0.00639972	0.0263321	0.00345214	0.026636	0.000876292	1.915e-05	0.0001652
1.4.3.21	0.0141916	0.00119605	0.00537277	7.05075e-05	0.00670817	0.00301488	0.0065651	0.0013073	0.00460458	0.000649104	0.00886665	0.000414941	1.919e-05	0.0001652
3.2.1.89	0.0116683	0.00102136	0.00614384	0.000504174	0.00940021	0.00272319	0.0062365	0.000771214	0.009228	0.00137232	0.00426679	0.00067299	1.924e-05	0.0001652
1.13.11.80	0.00149894	0.000298007	0.000737219	0.00034527	0.000596792	0.000359568	0.000292288	0.000378891	2.11263e-06	5.17486e-06	6.15602e-05	5.13395e-05	1.924e-05	0.0001652
5.3.2.1	0.00204332	0.000694771	0.000570502	0.000198146	0.000629282	0.000254077	0.00270952	0.000714024	0.00408993	0.0012599	0.00116878	0.000244495	1.933e-05	0.0001652
3.1.21.4	0.00265228	0.000325102	0.00168664	0.000331242	0.00288352	0.000914596	0.00166757	0.000388771	0.00227236	0.000160015	0.0074957	0.000497789	1.937e-05	0.0001652
2.1.1.177	0.0142843	0.00109628	0.0231427	0.00110294	0.0198326	0.00219981	0.0182255	0.00162803	0.0233494	0.00154594	0.0181248	0.00171603	1.94e-05	0.0001652
1.5.1.30	0.00675591	0.000606792	0.00434859	0.00025329	0.00727487	0.000658775	0.0111966	0.00144832	0.010301	0.00083334	0.0100649	0.000626216	1.94e-05	0.0001652
3.5.3.3	0.00271417	0.000266236	0.00523048	0.000521574	0.00372672	0.000327319	0.00529067	0.00260027	0.00180086	0.000249533	0.00345625	0.000423544	1.94e-05	0.0001652
2.5.1.152	8.63948e-05	7.05157e-05	0	0	0	0	0	0	0	0	0	0	1.946e-05	0.0001652
4.4.1.22	0.00149733	0.000270878	0.000301211	0.000204949	0.000744334	0.000164326	0.000537969	0.000428948	0.000105068	5.35865e-05	0.000106731	5.16956e-05	1.953e-05	0.0001652
2.7.2.1	0.03701	0.001991	0.0308805	0.00273843	0.0441963	0.00334325	0.040546	0.00457066	0.0518758	0.00209985	0.046127	0.00129114	1.963e-05	0.0001652
2.1.1.107	0.0688219	0.00144177	0.0545337	0.00477714	0.0590481	0.00358016	0.0563192	0.00302595	0.0540372	0.000896716	0.0731679	0.00390454	1.965e-05	0.0001652
1.7.99.1	0.0291301	0.00263102	0.0470604	0.00190702	0.0469653	0.00913099	0.0350984	0.00618765	0.0239779	0.00177829	0.0362332	0.00292914	1.965e-05	0.0001652
1.11.1.7	0.0203028	0.00358906	0.0073535	0.000780858	0.0136859	0.00123013	0.0164262	0.00687997	0.00885995	0.0010287	0.00944352	0.000578608	1.968e-05	0.0001652
2.7.1.225	0.00544241	0.000796328	0.00351472	0.000285802	0.00311217	0.000961294	0.00179216	0.000631288	0.00128142	0.000354439	0.00191998	0.000269564	1.981e-05	0.0001652
6.2.1.1	0.186936	0.00708034	0.206459	0.00289453	0.208732	0.00462605	0.200186	0.0135032	0.163481	0.00541419	0.244821	0.0064879	1.983e-05	0.0001652
7.4.2.8	0.372147	0.0096963	0.417608	0.00927141	0.401169	0.00920314	0.400967	0.0295707	0.327318	0.00936338	0.437108	0.00555747	1.985e-05	0.0001652
2.7.7.62	0.0132466	0.000671863	0.00929156	0.00114932	0.0125884	0.0015727	0.0139683	0.00062024	0.010168	0.000579596	0.0201324	0.00164822	1.987e-05	0.0001652
4.2.1.20	0.1279	0.00421779	0.141033	0.00357967	0.143132	0.00203173	0.140013	0.00494325	0.145298	0.00252637	0.167442	0.00400334	1.989e-05	0.0001652
3.2.1.139	0.00677248	0.000486886	0.00562517	0.000105557	0.00353686	0.0011274	0.00272935	0.000793848	0.00828127	0.00112584	0.0034309	0.000457927	1.993e-05	0.0001652
2.7.1.172	0.0150159	0.00131477	0.023363	0.00140742	0.0224146	0.00208381	0.0301617	0.00399555	0.0295554	0.00250082	0.0286214	0.00122136	1.994e-05	0.0001652
6.3.2.3	0.0264194	0.0012894	0.0322406	0.00096259	0.0270486	0.00189263	0.0367313	0.00353989	0.0303068	0.00224602	0.0244831	0.000938373	1.996e-05	0.0001652
3.6.1.12	0.00649426	0.000778344	0.0086751	0.000102959	0.00986397	0.0016146	0.00737321	0.00121307	0.0123107	0.00165208	0.0124018	0.000863904	1.996e-05	0.0001652
1.13.12.4	0.00639775	0.000926875	0.00205637	0.000227712	0.00400702	0.000782466	0.00275623	0.000748709	0.00235233	0.000384888	0.0039053	0.000426594	1.998e-05	0.0001652
3.6.5.5	0.000281787	0.000161373	0.000525684	0.000212962	0.00142071	0.000613606	0.00239003	0.000512254	0.00180575	0.000270772	0.00131862	0.00016678	1.998e-05	0.0001652
3.5.1.49	0.0262703	0.00171655	0.0182601	0.000740028	0.0157166	0.00374622	0.0291916	0.00194295	0.0156989	0.00263622	0.0138515	0.000952626	2.002e-05	0.0001652
2.6.1.48	0.020984	0.00120367	0.0274048	0.000644235	0.0239	0.000976808	0.0271006	0.00229043	0.0225892	0.0018941	0.0314385	0.000984758	2.009e-05	0.0001652
4.1.2.20	0.00768823	0.00083014	0.00502179	0.00118552	0.00502186	0.0010256	0.00737032	0.00061588	0.00608073	0.000262509	0.00400214	0.000318125	2.014e-05	0.0001652
2.3.1.135	8.26696e-06	1.24261e-05	0	0	9.57001e-05	5.82469e-05	0.000517801	0.000154445	0.000172422	5.02486e-05	0.000150138	7.25735e-05	2.017e-05	0.0001652
1.3.7.1	0.00327042	0.000443798	0.00635841	0.00127101	0.00658108	0.00101433	0.00463191	0.000472624	0.00327219	0.000925203	0.00719227	0.000758644	2.018e-05	0.0001652
5.4.99.1	0.00291543	0.000492665	0.000419281	0.000243279	0.00105651	0.000239581	0.0012357	0.000945591	0.0022926	0.000382475	0.00033507	8.76505e-05	2.018e-05	0.0001652
1.4.1.28	0.000464913	0.000124157	0.000934292	0.000367409	0.000546153	0.000326434	0.00144482	0.000183044	0.00160434	0.000266122	0.00188249	0.000227808	2.025e-05	0.0001652
2.1.1.1	0.000291436	9.45124e-05	0	0	0.000182673	0.000155142	0	0	5.25249e-06	1.28659e-05	2.62077e-05	4.07443e-05	2.026e-05	0.0001652
1.1.1.94	0.0486888	0.00109806	0.0503458	0.000837535	0.0515196	0.00220736	0.0641738	0.00571081	0.0607334	0.0024527	0.0624899	0.000878256	2.027e-05	0.0001652
1.14.13.227	0.00100671	0.000249242	0.00101821	0.000675891	0.000222472	0.000125245	6.0037e-05	6.63179e-05	8.90191e-05	5.45787e-05	0.000264662	9.35682e-05	2.03e-05	0.0001652
2.1.1.45	0.0315814	0.00113898	0.0447283	0.00280021	0.0413404	0.00461393	0.0333658	0.00275201	0.0367563	0.00146823	0.0333875	0.000569145	2.036e-05	0.0001652
2.8.4.3	0.0711176	0.00146531	0.0814718	0.00075492	0.0806342	0.0031838	0.079789	0.00176161	0.0770377	0.00155439	0.0847916	0.00186007	2.037e-05	0.0001652
3.3.2.6	0.00590792	0.000589235	0.0152378	0.00171583	0.00852539	0.00210122	0.00855033	0.00202655	0.00544132	0.00101925	0.00352153	0.000291358	2.04e-05	0.0001652
3.1.1.17	0.112797	0.00813081	0.0644459	0.00392213	0.0700361	0.00943195	0.0655707	0.00758595	0.0738349	0.00377063	0.0537891	0.00151625	2.045e-05	0.0001652
3.1.21.5	0.00553449	0.000739913	0.00582691	0.000977801	0.0135134	0.00431242	0.00699347	0.00125564	0.0113342	0.000576625	0.0171857	0.000990756	2.05e-05	0.0001652
2.4.1.14	0.0170153	0.00193659	0.0130244	0.00037843	0.0157243	0.00286585	0.0269501	0.00356198	0.0354923	0.00110902	0.0187732	0.00151333	2.058e-05	0.0001652
2.1.3.1	0.0166658	0.00119539	0.00832141	0.00244319	0.0137681	0.00113685	0.0154748	0.00122954	0.0122186	0.00238942	0.02184	0.00109936	2.062e-05	0.0001652
6.3.5.10	0.0236423	0.00241297	0.0116176	0.00214491	0.0172304	0.00231381	0.0202446	0.00294497	0.0139634	0.00114744	0.0125306	0.000728963	2.065e-05	0.0001652
3.2.1.208	0.00159063	0.000325074	0.000579955	0.000265217	0.000871159	0.000216675	0.000316586	8.90169e-05	0.000319433	5.03239e-05	0.00133392	0.000281447	2.077e-05	0.0001652
4.2.1.156	0.00575817	0.000792125	0.00323706	0.00014137	0.00487517	0.00145327	0.00151045	0.00037175	0.00239177	0.000449734	0.0020524	0.000303267	2.079e-05	0.0001652
3.5.1.87	0.0390892	0.0021837	0.0285509	0.00201977	0.0277402	0.00432207	0.0379975	0.00447616	0.0247229	0.00244328	0.0212915	0.000804849	2.085e-05	0.0001652
3.13.2.1	0.101827	0.00268219	0.124649	0.00455533	0.113997	0.00344532	0.11822	0.0133801	0.0973817	0.00269334	0.121356	0.00246573	2.088e-05	0.0001652
2.1.1.273	0.000206069	6.60119e-05	1.61813e-05	2.80268e-05	4.89946e-05	4.32729e-05	0	0	1.21924e-05	2.98652e-05	0	0	2.091e-05	0.0001652
2.7.1.199	0.0016059	0.000357319	0.0019955	0.0014577	0.00159275	0.0004095	0.00515196	0.00165416	0.00671075	0.00142387	0.0162046	0.00359797	2.098e-05	0.0001652
1.14.12.7	0.0199876	0.00255408	0.0078138	0.0012246	0.00761023	0.00224493	0.00554604	0.00259315	0.00327692	0.000470272	0.0055311	0.000384286	2.1e-05	0.0001652
2.7.7.5	0.0024433	0.000323358	0.00163925	0.000431662	0.00255315	0.00026574	0.00449504	0.000487987	0.00349691	0.000638988	0.00409078	0.000431526	2.101e-05	0.0001652
1.1.1.421	0.00285992	0.000302256	0.00195396	0.000544155	0.00356695	0.000402575	0.00101973	0.000325777	0.00171548	0.000400691	0.00260551	0.000547016	2.106e-05	0.0001652
1.3.1.34	0.023115	0.00168872	0.0341198	0.00265676	0.0333445	0.00233755	0.0308837	0.00243813	0.0345191	0.00333699	0.0495655	0.00544242	2.107e-05	0.0001652
4.2.1.25	0.0280822	0.00232211	0.02479	0.00200577	0.0170523	0.00365679	0.0142083	0.00258212	0.0106994	0.00158921	0.0131488	0.000726893	2.111e-05	0.0001652
2.1.1.22	4.8141e-05	4.50544e-05	0.000335877	2.20399e-05	9.95237e-05	8.76973e-05	0.000878518	0.000448804	9.41271e-06	1.09225e-05	0.000232865	4.98609e-05	2.113e-05	0.0001652
4.1.3.45	0.00232107	0.000499893	0.00448664	0.0007458	0.00325499	0.000558521	0.00280623	0.000302331	0.00527774	0.000534626	0.00398281	0.00041056	2.114e-05	0.0001652
1.14.20.4	0.000248742	0.000126185	0.000588592	0.000287997	0.000246458	0.000152562	0	0	6.16539e-06	9.5514e-06	2.5481e-05	2.41896e-05	2.122e-05	0.0001652
2.6.1.57	0.00461165	0.000568679	0.00830212	0.00122888	0.00582341	0.000614562	0.00258226	0.000568932	0.00218969	0.000494566	0.0044891	0.00170347	2.129e-05	0.0001652
2.7.1.147	0.000123352	7.52892e-05	0.000165168	7.6644e-05	0.00198194	0.00118839	0.000272745	0.000115467	0.000381055	0.000120495	0.000462782	4.95561e-05	2.132e-05	0.0001652
2.7.1.146	0.000123352	7.52892e-05	0.000165168	7.6644e-05	0.00198194	0.00118839	0.000272745	0.000115467	0.000381055	0.000120495	0.000462782	4.95561e-05	2.132e-05	0.0001652
1.2.1.5	0.00878159	0.000947432	0.0109535	0.00152174	0.00854611	0.00170317	0.0169796	0.00324159	0.0114965	0.00153931	0.0322114	0.00103226	2.135e-05	0.0001652
4.1.1.97	0.00688625	0.000834271	0.00360908	0.000217822	0.0031952	0.000964463	0.00434192	0.00199231	0.00145636	0.000335751	0.00196275	0.000342819	2.135e-05	0.0001652
3.4.21.10	4.85523e-05	3.29275e-05	0.000136703	0.000130394	0.00016544	7.69594e-05	0.000454017	0.000110866	0.000350747	8.49182e-05	0.000157635	5.86583e-05	2.135e-05	0.0001652
3.2.1.26	0.0141857	0.00152821	0.0104311	0.00198257	0.018406	0.00227581	0.0148886	0.00211126	0.0231041	0.000849153	0.0226434	0.00178446	2.136e-05	0.0001652
1.14.19.77	0.000886359	0.000210028	0.000297195	0.000120715	0.000621716	0.000308973	9.85165e-05	0.00011748	5.74935e-05	4.66052e-05	0.000177871	4.57097e-05	2.137e-05	0.0001652
1.21.98.1	0.0169465	0.00191517	0.0160027	0.00128162	0.014358	0.00116254	0.0113265	0.0021226	0.0107407	0.00248377	0.00756747	0.000355723	2.142e-05	0.0001652
2.7.8.5	0.0567654	0.00116482	0.0654548	0.00204922	0.0564692	0.00334255	0.063954	0.00526304	0.0714222	0.00136884	0.0796913	0.0022413	2.143e-05	0.0001652
2.8.3.13	0.0258166	0.0022746	0.0168226	0.00077033	0.0148442	0.00274081	0.011158	0.00207242	0.00964529	0.00101623	0.0133126	0.000810374	2.152e-05	0.0001652
5.1.1.12	0.0044326	0.000606444	0.00738999	0.00153442	0.00687618	0.00192107	0.00704573	0.00100195	0.0110205	0.00264531	0.00502692	0.000586877	2.158e-05	0.0001652
1.13.11.52	0.00236936	0.00036066	0.000921296	0.000441219	0.00143635	0.000433188	0.00138328	0.000866328	0.000295081	8.36989e-05	0.000476433	0.000160572	2.167e-05	0.0001652
2.4.1.246	0.00699313	0.000750723	0.0019005	5.45613e-05	0.00487913	0.00117307	0.00360896	0.000774312	0.00273982	0.000824733	0.00299152	0.000478124	2.17e-05	0.0001652
2.7.4.23	0.00263156	0.000431196	0.00108588	0.000377219	0.00174281	7.55268e-05	0.0021216	0.000433483	0.00140928	0.000260307	0.00126409	0.000277723	2.172e-05	0.0001652
1.14.19.59	0.00168577	0.000438802	0.000966327	0.000169937	0.000764413	0.000312617	0.00315059	0.00121719	0.00125493	0.000291408	0.000196853	8.99233e-05	2.172e-05	0.0001652
3.1.1.13	0.00478674	0.000992343	0.00919573	0.000655913	0.00558411	0.00159741	0.0110739	0.00150609	0.0119293	0.00137878	0.00760699	0.00152468	2.176e-05	0.0001652
1.3.99.8	0.0114383	0.00202853	0.00527232	0.000352297	0.00413703	0.00190167	0.00331689	0.00165528	0.000906057	0.000248959	0.00262965	0.000461097	2.176e-05	0.0001652
6.1.1.13	0.0115819	0.00102309	0.0079191	0.000242103	0.00845426	0.000607844	0.00831839	0.000734153	0.00740416	0.000808601	0.00641416	0.000452999	2.183e-05	0.0001652
1.14.15.11	0.00484491	0.000433699	0.00151083	0.000589798	0.00133072	0.000539947	0.000750971	0.000183775	0.000979648	0.000245667	0.00210376	0.0001576	2.183e-05	0.0001652
1.10.3.11	0.000414192	0.000192557	0.00159621	0.000519125	0.00197404	0.000649025	0.00280922	0.00114903	0.000868083	0.000288335	0.00125872	0.000289168	2.185e-05	0.0001652
2.7.4.16	0.0315387	0.00137539	0.0326722	0.000468935	0.0295652	0.00232731	0.0369928	0.00192036	0.0386785	0.00135454	0.0364554	0.000895457	2.188e-05	0.0001652
2.8.4.2	0.00013063	9.11977e-05	1.00006e-05	1.73216e-05	5.74573e-05	4.35117e-05	4.69035e-06	1.1489e-05	0	0	0.000216667	4.17634e-05	2.188e-05	0.0001652
1.14.99.44	0.00703578	0.000638157	0.0102737	0.000352551	0.0133797	0.00236963	0.0139036	0.00294666	0.0144741	0.000723624	0.019477	0.00155983	2.189e-05	0.0001652
3.7.1.8	0.000596423	9.59935e-05	0.00101537	0.000125682	0.000422064	0.000158164	0.00082184	0.000205608	0.00219216	0.000551017	0.000721591	7.2245e-05	2.19e-05	0.0001652
3.4.21.92	0.067039	0.00360946	0.0768782	0.00145837	0.0804327	0.00534201	0.0790305	0.00375326	0.0666233	0.00401942	0.0921297	0.00233183	2.198e-05	0.0001652
1.14.13.166	0.00107264	0.000246232	0.000659947	0.000438196	0.000193299	0.000140851	8.97152e-05	6.78658e-05	9.03278e-05	8.67324e-05	0.000443069	0.00012213	2.198e-05	0.0001652
3.1.3.104	0.0234999	0.00189998	0.0278074	0.00407592	0.0295606	0.00346848	0.0291336	0.00453222	0.0357985	0.000986748	0.0481977	0.00282382	2.199e-05	0.0001652
4.1.1.123	0.00500418	0.000876824	0.00483165	0.00020918	0.00310831	0.000417167	0.00175868	0.000742106	0.00323863	0.00113769	0.00139452	0.000398893	2.203e-05	0.0001652
3.1.31.1	0.0542128	0.00182652	0.0422363	0.00372585	0.0491683	0.00330581	0.0514048	0.00531758	0.0593947	0.00313773	0.066459	0.00131173	2.207e-05	0.0001652
1.14.19.57	0.000781589	0.00025282	0.000359527	0.000235662	0.000738657	0.000215057	0.000233913	0.000137016	8.13727e-05	3.12444e-05	3.59714e-05	4.30247e-05	2.209e-05	0.0001652
6.1.1.1	0.0958424	0.00211508	0.130919	0.00524666	0.115989	0.00488784	0.112758	0.00735317	0.0928636	0.00346963	0.110283	0.0147936	2.219e-05	0.0001652
1.14.13.242	0.000664633	0.000121689	7.20537e-05	1.91325e-05	0.000194864	0.000158712	0.000433135	8.98085e-05	0.000450641	7.52219e-05	0.000101976	5.92148e-05	2.222e-05	0.0001652
3.5.3.1	0.0262652	0.0017254	0.0267523	0.00264886	0.0255342	0.00180966	0.0192266	0.00158207	0.0166427	0.000967372	0.0182947	0.000519118	2.224e-05	0.0001652
2.7.1.92	0.0199768	0.00139898	0.0150448	0.00093515	0.0152348	0.00352731	0.00875083	0.00241977	0.00746835	0.00144999	0.00932523	0.0010912	2.225e-05	0.0001652
1.5.1.44	7.59448e-05	7.14571e-05	0.00020094	3.3691e-05	0.000844658	0.000369548	0.00102423	0.000327576	0.000216622	8.99157e-05	0.000426704	0.000186954	2.225e-05	0.0001652
4.1.99.14	0.00192177	0.000422274	0.00225515	0.000160346	0.00139639	0.000203932	0.00386774	0.000923977	0.00552073	0.0012796	0.00215092	0.000364787	2.227e-05	0.0001652
4.3.2.9	0.00964801	0.000715158	0.012203	0.00245415	0.00698804	0.001559	0.0124831	0.00122195	0.0120353	0.00159459	0.0151415	0.0011093	2.228e-05	0.0001652
2.3.2.13	0.0714003	0.00164929	0.069302	0.00587239	0.0751621	0.00394732	0.0855325	0.00365461	0.0939978	0.00516121	0.0861668	0.00243318	2.231e-05	0.0001652
2.3.1.255	0.00243472	0.000338044	0.00310432	0.000130445	0.00310127	0.000834349	0.000853981	0.000487943	0.0012512	0.000367772	0.00132378	0.000201084	2.231e-05	0.0001652
1.14.13.236	0.000408529	0.000203312	0.000187601	0.000243511	6.32532e-05	7.97871e-05	5.58221e-05	7.01888e-05	4.1711e-06	1.02171e-05	0.00170806	0.000526768	2.242e-05	0.0001652
5.4.2.12	0.0710411	0.00413404	0.069481	0.00342718	0.0827958	0.00675015	0.0816087	0.00671306	0.0968349	0.00565949	0.0643572	0.00178012	2.243e-05	0.0001652
2.7.1.193	0.00237218	0.000376127	0.00277583	0.0016545	0.00341571	0.000648737	0.00592323	0.00256669	0.00770409	0.00141689	0.015575	0.00244869	2.248e-05	0.0001652
5.1.1.10	0.0082534	0.000941451	0.0130107	0.00172082	0.0110033	0.00121047	0.0153946	0.00297716	0.0190428	0.00119731	0.0113498	0.000805723	2.251e-05	0.0001652
1.1.1.346	0.0319713	0.00139968	0.0220385	0.000652644	0.0226786	0.00483246	0.0235751	0.00253664	0.0385225	0.00253445	0.0260374	0.00223961	2.256e-05	0.0001652
1.1.1.101	0.00417472	0.000276185	0.00593031	7.83416e-05	0.00702288	0.000955121	0.00478477	0.000431869	0.00394939	0.00045366	0.00629128	0.000654805	2.259e-05	0.0001652
3.7.1.19	0.00308523	0.000318231	0.00444314	0.000883943	0.00131654	0.000700628	0.0014616	0.000879882	0.000326114	0.000243351	0.000646037	0.000139874	2.26e-05	0.0001652
1.14.19.21	0.0047257	0.000721021	0.0023655	0.000641501	0.00192751	0.000854955	0.00411701	0.00104005	0.00328309	0.000419236	0.00200472	0.000329819	2.264e-05	0.0001652
4.1.1.25	0.00507199	0.000790153	0.0107598	0.000283715	0.00649152	0.00140796	0.0107262	0.00138929	0.0097554	0.000290673	0.00688639	0.000924235	2.274e-05	0.0001652
1.14.19.27	0.00489075	0.000986678	0.00117567	0.0002248	0.00278825	0.000580559	0.00227692	0.000811738	0.00106383	0.000270703	0.00147393	0.000418512	2.28e-05	0.0001652
3.2.1.1	0.123324	0.00206859	0.0970676	0.00328658	0.135776	0.00649352	0.119786	0.00870635	0.126648	0.00262066	0.149743	0.00229493	2.282e-05	0.0001652
2.1.1.207	0.0165325	0.000826172	0.0238069	0.00103718	0.0189612	0.00221646	0.0204967	0.00180057	0.0202973	0.000763131	0.0272925	0.000830762	2.282e-05	0.0001652
3.3.2.2	0.00887988	0.00104109	0.00926413	0.000412918	0.0121005	0.00146574	0.0105316	0.00200192	0.0144165	0.000845476	0.0174668	0.000843396	2.282e-05	0.0001652
3.1.1.98	0.002739	0.000291229	0.00217335	0.000250609	0.00467558	0.000633777	0.0033802	0.000411047	0.00365532	0.000653904	0.00232626	0.00010274	2.282e-05	0.0001652
1.3.1.76	0.0327684	0.00146253	0.0222042	0.000478536	0.0258789	0.00215456	0.0252286	0.00288251	0.0296292	0.00168333	0.0339952	0.00341036	2.283e-05	0.0001652
2.7.1.218	0.000906016	0.000188967	0.00156713	0.000317251	0.002556	0.000753677	0.000847076	0.000232933	0.000483907	9.05869e-05	0.000628655	9.3445e-05	2.283e-05	0.0001652
3.4.21.102	0.140065	0.00421549	0.173735	0.0012141	0.172924	0.0144761	0.159771	0.00821127	0.166158	0.00749167	0.132243	0.00656273	2.294e-05	0.0001652
2.7.1.16	0.032472	0.00424434	0.0181132	0.000712635	0.024733	0.00179454	0.0192611	0.00590058	0.033129	0.00216682	0.0211451	0.000383691	2.297e-05	0.0001652
2.1.1.170	0.0384839	0.00161161	0.0469494	0.00130556	0.0439141	0.00320119	0.0430254	0.0022674	0.0488045	0.00105773	0.0511616	0.00202295	2.298e-05	0.0001652
3.2.1.80	0.0117131	0.000745367	0.0130184	0.00197757	0.0147111	0.00219313	0.0112019	0.00125273	0.0188328	0.00146139	0.00927815	0.000370967	2.298e-05	0.0001652
7.2.2.5	0.00888927	0.000571735	0.00841332	0.00159389	0.0141167	0.00155938	0.0147489	0.00197333	0.0148668	0.0012727	0.0112758	0.000833876	2.303e-05	0.0001652
2.4.2.14	0.0678408	0.00181286	0.0838996	0.00220915	0.0803141	0.00692463	0.0783972	0.00314703	0.0709123	0.0017128	0.0823286	0.000938102	2.306e-05	0.0001652
3.5.1.6	0.0627131	0.00214972	0.0552641	0.00234523	0.0482146	0.00719273	0.0604568	0.00751711	0.0489037	0.00375939	0.0355142	0.000800596	2.307e-05	0.0001652
4.1.1.77	0.00858651	0.000543474	0.00407865	0.000364965	0.00479783	0.000865389	0.00212779	0.000982326	0.0033201	0.000847196	0.00439152	0.00037631	2.311e-05	0.0001652
1.16.3.2	0.00903676	0.000530494	0.0177011	0.00122401	0.0139767	0.00359933	0.0152773	0.00140491	0.0210619	0.0047094	0.0104355	0.00120469	2.322e-05	0.0001652
2.7.7.49	0.138132	0.0123395	0.112467	0.0249093	0.108263	0.00917518	0.191987	0.0140259	0.181702	0.0235119	0.125946	0.00750454	2.326e-05	0.0001652
1.5.99.6	0.0109776	0.000958883	0.0144153	0.0016626	0.00512503	0.000707641	0.0150043	0.00736455	0.00438798	0.00110886	0.00366849	0.000923942	2.326e-05	0.0001652
1.1.1.62	0.00760574	0.000343007	0.00533231	0.000934577	0.00773603	0.00034205	0.00588051	0.000625405	0.00467145	0.000507148	0.00473693	0.000294052	2.326e-05	0.0001652
4.1.1.112	0.00274574	0.000403361	0.000539841	0.000182767	0.00118489	0.000293417	0.00111408	0.000371575	0.000724985	0.00019169	0.00155802	0.000176331	2.33e-05	0.0001652
2.6.1.22	0.0209091	0.00119115	0.0267429	0.000441686	0.0230354	0.000784628	0.0270786	0.0023326	0.0224824	0.00185616	0.0310108	0.00101584	2.338e-05	0.0001652
5.1.99.8	0.0179621	0.00109048	0.0300762	0.00227354	0.0242978	0.00322869	0.0235047	0.00300658	0.0262798	0.00115811	0.031314	0.0020336	2.342e-05	0.0001652
1.13.11.81	0.0179621	0.00109048	0.0300762	0.00227354	0.0242978	0.00322869	0.0235047	0.00300658	0.0262798	0.00115811	0.031314	0.0020336	2.342e-05	0.0001652
1.14.13.247	0.00180808	0.000226581	0.00244549	0.000111922	0.00185972	0.000570995	0.000824699	0.000403587	0.000554704	0.000244885	0.00103197	7.06234e-05	2.346e-05	0.0001652
2.7.1.166	0.00262813	0.000330461	0.00675928	0.000790978	0.004723	0.000866008	0.00707863	0.00140558	0.0050728	0.000517189	0.00453228	0.000628766	2.347e-05	0.0001652
4.2.1.77	0.00333513	0.000533011	0.0083806	0.00106378	0.00480692	0.000484249	0.00709122	0.00177716	0.00333403	0.000600053	0.00404525	0.000231034	2.347e-05	0.0001652
2.4.1.83	0.151685	0.00164514	0.125824	0.00448	0.147058	0.00661536	0.11971	0.00497973	0.15363	0.00687493	0.131242	0.0040138	2.351e-05	0.0001652
3.5.4.13	0.0337275	0.00238587	0.0397536	0.00210936	0.0387749	0.00117857	0.0382983	0.00324869	0.0286597	0.00254922	0.0435876	0.00190089	2.354e-05	0.0001652
1.2.1.8	0.02833	0.00127373	0.0266072	0.00134665	0.0262777	0.003277	0.019332	0.00226285	0.0196492	0.00205993	0.0478977	0.00310757	2.354e-05	0.0001652
1.5.1.6	0.000242728	0.000152464	0.000249444	4.23446e-05	2.11987e-05	2.08656e-05	8.14971e-05	5.11209e-05	6.46355e-05	3.03955e-05	3.89065e-06	9.5301e-06	2.358e-05	0.0001652
3.1.2.23	0.00864439	0.00117551	0.00610657	0.000396072	0.00464662	0.000529132	0.0036174	0.00155181	0.00253886	0.000342417	0.00313492	0.000443605	2.37e-05	0.0001658
1.2.5.3	0.406245	0.0238911	0.225924	0.00612878	0.242565	0.0502833	0.227892	0.0235886	0.195934	0.0109242	0.172277	0.00207584	2.376e-05	0.0001658
2.4.1.161	0.00279856	0.000328262	0.00418007	0.00158894	0.00623507	0.00276058	0.0101473	0.00131476	0.00552111	0.0010145	0.00426805	0.000263691	2.386e-05	0.0001658
1.14.99.63	0.000301323	0.00010468	0.00104237	0.000278682	0.00252809	0.00178533	0.00375161	0.00147456	0.0024898	0.000258231	0.00180132	0.00025844	2.402e-05	0.0001658
1.14.99.64	0.000301323	0.00010468	0.00104237	0.000278682	0.00252809	0.00178533	0.00375161	0.00147456	0.0024898	0.000258231	0.00180132	0.00025844	2.402e-05	0.0001658
4.4.1.1	0.0191725	0.001354	0.0242714	0.00204732	0.0186134	0.00148562	0.0243978	0.00525952	0.0160035	0.00169405	0.0126165	0.00134469	2.412e-05	0.0001658
3.5.1.104	0.0823834	0.00473866	0.0803513	0.00488521	0.0867697	0.00219816	0.0651411	0.00241913	0.0778514	0.00199032	0.0938677	0.0023688	2.414e-05	0.0001658
1.11.1.29	0.012843	0.000703635	0.0135713	0.000463866	0.00841957	0.00151192	0.0143621	0.00256267	0.0104082	0.000445426	0.0161556	0.000800755	2.414e-05	0.0001658
2.3.1.264	0.000842981	0.000711145	0.00108222	0.000294018	0.00384861	0.00199216	0.00220023	0.000650847	0.00713277	0.00288424	0.00166646	0.000225184	2.414e-05	0.0001658
1.4.3.25	0.000381619	0.000155045	3.21248e-06	5.56417e-06	6.42164e-05	5.776e-05	0	0	0	0	1.3408e-06	3.28428e-06	2.417e-05	0.0001658
1.3.8.6	0.0324403	0.00233522	0.0464673	0.00274022	0.0390945	0.00140334	0.0419732	0.00983954	0.0269505	0.00118724	0.0421718	0.00151816	2.419e-05	0.0001658
2.1.3.6	0.00013883	8.41708e-05	0.000755461	0.000172401	0.000815725	0.000154621	6.49438e-05	8.7692e-05	0.000180904	7.8701e-05	0.00221791	0.000267355	2.422e-05	0.0001658
1.5.3.19	0.00718226	0.000457599	0.0151516	0.00138874	0.00899706	0.00153625	0.00849774	0.000969574	0.00626937	0.000375847	0.0124344	0.000806673	2.424e-05	0.0001658
6.1.1.10	0.0957343	0.00230488	0.119075	0.00350478	0.113852	0.00656152	0.111855	0.00187054	0.102873	0.00407637	0.109694	0.0014097	2.431e-05	0.0001658
6.1.1.19	0.0893449	0.00199882	0.104512	0.0011045	0.0980125	0.00338415	0.0953437	0.00328065	0.0884592	0.00339005	0.0987926	0.00248605	2.431e-05	0.0001658
1.1.1.141	0.00206926	0.000339523	0.000863551	0.000218675	0.00145572	0.000400982	0.00125634	9.61271e-05	0.00111782	0.000278459	0.00268754	0.000234051	2.436e-05	0.0001658
1.1.1.91	0.0139722	0.0013014	0.00683806	0.000844947	0.00898773	0.00178611	0.00676667	0.00073048	0.00964347	0.000549703	0.00593829	0.00029615	2.445e-05	0.0001658
2.4.1.356	0.014786	0.000948931	0.00932805	0.000685891	0.0122814	0.00108169	0.00941385	0.00116751	0.0151819	0.00185343	0.00934856	0.000644677	2.454e-05	0.0001658
5.6.2.1	0.127652	0.00462496	0.152383	0.00223843	0.152264	0.00833143	0.142256	0.00837179	0.121612	0.00397223	0.14483	0.00395022	2.455e-05	0.0001658
2.7.1.150	7.46796e-06	1.18933e-05	0.000191237	9.4051e-05	0.000184161	0.000242799	0	0	0	0	0	0	2.457e-05	0.0001658
2.5.1.103	0.00690996	0.000622767	0.00410212	0.000245185	0.00268484	0.000998507	0.00449005	0.00106203	0.00275084	0.000802466	0.00402095	0.000288188	2.463e-05	0.0001658
3.6.1.55	0.157889	0.00528427	0.150856	0.0039463	0.181136	0.00391288	0.166632	0.0214401	0.194465	0.0063739	0.213703	0.00687769	2.485e-05	0.0001658
2.1.1.296	1.55319e-06	4.65957e-06	0.000959449	0.00051838	0.000160272	0.000175795	0	0	0	0	1.19415e-05	1.85218e-05	2.493e-05	0.0001658
1.5.3.17	0.00280343	0.000486896	0.00505072	0.000671399	0.00581504	0.00101367	0.00312795	0.000258419	0.00258091	0.00039908	0.00776525	0.000658049	2.494e-05	0.0001658
2.6.1.84	0.0019463	0.000437532	0.00522764	0.000600046	0.00504998	0.000622239	0.00378112	0.00129809	0.00256913	0.000366671	0.00364025	0.000338891	2.501e-05	0.0001658
3.7.1.5	0.0285583	0.00233663	0.0220487	0.000369192	0.022438	0.00138318	0.0214976	0.00158595	0.0237358	0.00136967	0.0177286	0.00213029	2.505e-05	0.0001658
2.7.8.46	0.000550583	0.000195484	0.000408868	0.00014316	0.00027631	0.000132086	0	0	4.64865e-05	5.86539e-05	8.51962e-05	0.000102222	2.506e-05	0.0001658
2.5.1.6	0.0746524	0.00166509	0.0913063	0.00150309	0.0911963	0.0031041	0.0882696	0.00434355	0.0791799	0.00104047	0.08739	0.00283795	2.514e-05	0.0001658
2.4.1.144	0.00134671	0.000408137	0.000111315	7.23068e-05	0.000658181	0.000278617	0.000124728	0.000160167	3.96303e-05	3.7702e-05	2.63991e-05	3.7952e-05	2.519e-05	0.0001658
3.2.1.132	0.0013039	0.000220853	0.000985783	8.21536e-05	0.00133001	0.000259551	0.000513185	0.000245583	0.00066447	0.000290394	0.00217469	0.000402834	2.521e-05	0.0001658
1.6.2.4	0.00254019	0.000441211	0.000912016	5.71488e-05	0.00209293	0.000396956	0.00184066	0.000329728	0.000978995	0.000299154	0.00144518	0.000266846	2.528e-05	0.0001658
3.4.11.22	0	0	4.6844e-05	1.79238e-05	0	0	5.81912e-06	1.42539e-05	8.53155e-06	9.46626e-06	0.000147516	7.55435e-05	2.53e-05	0.0001658
2.6.1.45	0.0631721	0.00302124	0.061631	0.00293301	0.0567525	0.00242891	0.0613605	0.0025699	0.0516983	0.00262165	0.0446546	0.00303426	2.531e-05	0.0001658
3.5.2.14	0.259129	0.016589	0.165073	0.00699324	0.179682	0.0268694	0.193066	0.0191851	0.146741	0.00543432	0.143038	0.00433122	2.548e-05	0.0001658
2.7.1.130	0.0265641	0.0011807	0.0348603	0.0006457	0.0310064	0.00449433	0.0296934	0.00148038	0.0330683	0.00252912	0.0259037	0.0012815	2.553e-05	0.0001658
1.17.1.4	0.158277	0.00515819	0.136377	0.00473656	0.123865	0.0125549	0.127621	0.0161934	0.117144	0.00453368	0.0910206	0.00318058	2.555e-05	0.0001658
2.1.1.379	0.000366698	0.000121762	0.000443388	6.72913e-05	0.00184306	0.00110896	0.000209351	7.89211e-05	0.000239401	7.0482e-05	0.000726842	0.000175222	2.555e-05	0.0001658
1.14.13.39	1.05429e-05	1.3332e-05	2.67483e-05	2.92919e-06	0.000170163	0.000123364	0	0	0	0	0	0	2.558e-05	0.0001658
1.1.1.58	0.00194812	0.000499167	0.00119736	0.000281617	0.00173001	0.000382118	0.000754389	0.000154937	0.00117591	0.000269617	0.000599896	8.8094e-05	2.561e-05	0.0001658
1.14.13.209	0	0	0	0	0	0	7.47075e-05	8.44536e-05	0.000208419	0.000124547	0	0	2.561e-05	0.0001658
1.1.1.136	0.0587618	0.00146719	0.0688615	0.00106386	0.069241	0.00480169	0.0632625	0.00266459	0.0623626	0.00135996	0.0660297	0.0018345	2.568e-05	0.0001658
3.2.2.31	0.0500329	0.00137669	0.0574526	0.00101074	0.0568331	0.00278456	0.0614084	0.0045188	0.0641608	0.00259688	0.0621316	0.00177473	2.569e-05	0.0001658
1.1.1.426	0.0135979	0.000723788	0.0112985	0.000660353	0.00922359	0.0012044	0.0126361	0.000829264	0.0144381	0.000257547	0.0123476	0.00104678	2.569e-05	0.0001658
3.2.1.196	0.0020509	0.000444775	0.00300843	0.000183959	0.00297646	0.000777986	0.000750149	0.0004002	0.000397381	0.000218684	0.00233012	0.000287484	2.569e-05	0.0001658
1.8.1.16	2.48956e-05	3.51874e-05	0.000243171	0.000179557	0	0	0.000513014	0.000156315	0.000629319	0.000470892	0.000205243	0.000114643	2.569e-05	0.0001658
3.13.1.9	0.000169419	4.94721e-05	0.000367366	6.37028e-05	0.000801123	0.000556991	0	0	5.30028e-06	1.2983e-05	0.000418661	0.000226723	2.572e-05	0.0001658
4.3.1.24	0.00185782	0.000390377	0.000332169	0.000124452	0.00114605	0.000323017	0.0016716	0.00076954	0.000468334	0.000229526	0.000713039	0.000216233	2.576e-05	0.0001658
1.1.1.77	0.00243591	0.000494064	0.000477631	0.00027233	0.0017149	0.000405745	0.000695443	0.000210725	0.00178627	0.000177767	0.000731204	0.000239828	2.585e-05	0.0001658
1.1.1.310	0.00583395	0.00060504	0.00647935	0.000590109	0.00531995	0.00106668	0.00255323	0.000558243	0.00439354	0.000498695	0.003684	0.000234606	2.587e-05	0.0001658
1.14.12.18	0.000749391	0.000315729	1.09673e-05	1.89959e-05	9.65679e-05	6.4651e-05	0.000247787	0.000125605	0.000699776	0.000176444	9.55341e-05	6.75873e-05	2.587e-05	0.0001658
2.3.1.9	0.289694	0.00578009	0.236219	0.00325967	0.246968	0.0151555	0.259932	0.00689742	0.247176	0.00676726	0.265799	0.00344774	2.588e-05	0.0001658
2.3.1.48	0.00146301	0.000307615	0.000702363	0.000112299	0.00207535	0.000347896	0.000968282	0.000337377	0.00146721	0.000241544	0.0062593	0.00110724	2.588e-05	0.0001658
2.1.1.334	0.0402892	0.0024109	0.0317616	0.000891142	0.0356883	0.00486325	0.0260796	0.00271556	0.0344954	0.00192865	0.0268492	0.00132085	2.592e-05	0.0001658
7.2.3.1	0.115092	0.00348923	0.139631	0.00628631	0.136734	0.00159225	0.118897	0.00646222	0.111074	0.00147733	0.138656	0.00371611	2.596e-05	0.0001658
1.8.1.2	0.0424859	0.00397796	0.027211	0.00110748	0.0359932	0.00210897	0.0271393	0.00860516	0.0159587	0.00219966	0.0250818	0.00514974	2.603e-05	0.0001658
1.13.11.79	0.0229611	0.00122713	0.0193937	0.00105716	0.0191176	0.0023485	0.0207038	0.00198899	0.0287381	0.00229521	0.016759	0.000740874	2.609e-05	0.0001658
3.5.1.84	0.0367111	0.00228492	0.0218196	0.00234717	0.0239386	0.00201901	0.0217892	0.00473643	0.0210405	0.0020202	0.0148641	0.00102304	2.611e-05	0.0001658
2.3.1.292	0.00979698	0.000746335	0.00546741	0.000907133	0.0126665	0.00234238	0.00879702	0.00046255	0.00684509	0.000771147	0.0120977	0.000786088	2.611e-05	0.0001658
1.14.13.167	0.00105796	0.000235376	0.000659947	0.000438196	0.000185703	0.00014909	8.97152e-05	6.78658e-05	9.03278e-05	8.67324e-05	0.000443069	0.00012213	2.611e-05	0.0001658
5.3.1.14	0.024612	0.00265113	0.0143947	0.000378165	0.0173816	0.00190191	0.0145059	0.00236522	0.0253063	0.00151036	0.0142528	0.000688272	2.614e-05	0.0001658
2.1.1.64	0.0691311	0.00203108	0.0748148	0.00288342	0.0796313	0.00431259	0.0767736	0.00263708	0.09588	0.00437374	0.0791916	0.00168955	2.62e-05	0.0001658
4.1.99.1	0.00491051	0.00081205	0.00969933	0.000789281	0.00774002	0.000912959	0.00533368	0.00122416	0.00960661	0.00151394	0.0103573	0.000436301	2.627e-05	0.0001658
4.2.1.130	0.00238577	0.000232596	0.00248588	0.000119872	0.00477204	0.000595478	0.00547362	0.00239824	0.00345484	0.000675102	0.00570207	0.00100689	2.638e-05	0.0001658
7.2.2.22	0.000225501	8.33525e-05	0.000336987	0.00014352	0.000101331	8.03992e-05	0.00109768	0.000595989	0.000925013	0.000224208	0.00045779	0.000125227	2.643e-05	0.0001658
3.5.2.20	0.00985671	0.000829007	0.00671511	0.000578099	0.00782579	0.000508716	0.00629671	0.00184035	0.00456295	0.000671332	0.00625866	0.000384237	2.646e-05	0.0001658
1.5.1.54	0.106659	0.00520163	0.117226	0.00306788	0.100252	0.00323545	0.106471	0.00591648	0.117137	0.00536549	0.0923829	0.00176398	2.654e-05	0.0001658
2.4.1.355	0.00315455	0.000544757	0.00153812	0.000133421	0.0034729	0.000556481	0.00221449	0.000340572	0.00260155	0.000356226	0.00532377	0.000617349	2.654e-05	0.0001658
2.5.1.116	0.00199141	0.000403961	0.000614797	5.85867e-05	0.00241347	0.000429809	0.00263119	0.0004492	0.000438406	0.000260908	0.00113542	0.00025269	2.656e-05	0.0001658
2.5.1.115	0.00199141	0.000403961	0.000614797	5.85867e-05	0.00241347	0.000429809	0.00263119	0.0004492	0.000438406	0.000260908	0.00113542	0.00025269	2.656e-05	0.0001658
1.2.1.59	0.00294794	0.000312712	0.00386846	0.00015403	0.00592465	0.00176124	0.00589486	0.000650685	0.00239398	0.000414944	0.00287033	0.000201269	2.657e-05	0.0001658
6.1.1.17	0.0873629	0.00304537	0.0956525	0.00119996	0.103209	0.00623641	0.0950475	0.00312304	0.0890299	0.00360631	0.0957151	0.00172671	2.661e-05	0.0001658
1.14.13.160	0.0100053	0.0014274	0.00341762	0.000315922	0.00333828	0.0011663	0.00559458	0.000738111	0.005974	0.00145284	0.00343446	0.000460453	2.663e-05	0.0001658
2.4.1.315	0.00515535	0.0005756	0.00493483	0.00071334	0.00774455	0.000784847	0.00300638	0.000739779	0.00274809	0.000570686	0.00492481	0.000578292	2.663e-05	0.0001658
1.5.7.3	0.00809232	0.000625118	0.00696233	0.00088231	0.00826439	0.00151756	0.0105942	0.000877429	0.0121309	0.000924643	0.011059	0.000767555	2.664e-05	0.0001658
1.14.13.22	0.0643054	0.00573583	0.0373058	0.00186152	0.0421715	0.00692491	0.0487389	0.00337686	0.046507	0.00818151	0.0582078	0.00170078	2.669e-05	0.0001658
4.2.1.151	0.0113022	0.0012671	0.00981687	0.000267209	0.00832196	0.000554793	0.00671465	0.00120464	0.0084627	0.00132764	0.00463659	0.000579615	2.669e-05	0.0001658
4.1.1.102	0.00160425	0.000518924	0.00301321	0.000436078	0.000759964	0.000522557	0.00481088	0.00148107	0.00239042	0.000584624	0.00261128	0.000519916	2.669e-05	0.0001658
4.1.2.9	0.0339716	0.00238617	0.0177804	0.000936058	0.0267298	0.00484976	0.0192754	0.00246371	0.0232193	0.00156495	0.0319092	0.00176538	2.676e-05	0.0001658
4.1.2.22	0.0339716	0.00238617	0.0177804	0.000936058	0.0267298	0.00484976	0.0192754	0.00246371	0.0232193	0.00156495	0.0319092	0.00176538	2.676e-05	0.0001658
1.21.3.7	0.0014243	0.000286712	0.00137493	0.000327935	0.000653877	0.000263858	0.000550423	0.000365992	0.000382071	0.000108644	0.000175356	4.97198e-05	2.685e-05	0.0001661
1.14.15.35	0.00129708	0.00030195	0.000479763	5.02985e-05	0.000886852	0.000357268	0.000368028	4.503e-05	0.000361647	9.96435e-05	0.000464231	6.36643e-05	2.689e-05	0.0001661
1.8.3.1	0.0347058	0.00159571	0.0274587	0.00120592	0.0305967	0.00386531	0.0305818	0.00150273	0.0270761	0.003196	0.0192731	0.00154816	2.698e-05	0.0001663
3.1.6.1	0.0838053	0.00292639	0.055725	0.000762667	0.0707319	0.00539221	0.0672879	0.00760223	0.0815028	0.0096589	0.0540728	0.00334413	2.701e-05	0.0001663
2.7.7.82	0.0136876	0.00134955	0.0113731	0.000188146	0.013659	0.00101677	0.00887135	0.00247108	0.00676535	0.00135267	0.00886035	0.000547126	2.703e-05	0.0001663
1.1.1.103	0.034919	0.00134965	0.0550077	0.0011343	0.0483043	0.00310962	0.0402208	0.00402553	0.037613	0.00319013	0.0415861	0.00191552	2.712e-05	0.0001664
3.1.11.5	0.097309	0.00933877	0.0715722	0.00597054	0.104049	0.00970485	0.12509	0.0161614	0.14259	0.00317198	0.149743	0.0117679	2.714e-05	0.0001664
5.5.1.1	0.0107139	0.0014682	0.00823901	0.000769725	0.00736217	0.000854618	0.00628773	0.000681546	0.00445369	0.000813338	0.00713918	0.00143983	2.716e-05	0.0001664
6.1.1.5	0.161581	0.00326956	0.18667	0.00260289	0.179715	0.00600032	0.178883	0.008475	0.152234	0.00388521	0.179349	0.00379432	2.727e-05	0.0001665
2.4.2.29	0.0558374	0.00161985	0.0659491	0.00135317	0.0646989	0.00417358	0.0606823	0.00151461	0.0607629	0.00143731	0.0649783	0.00170347	2.73e-05	0.0001665
2.8.3.12	0.0743626	0.00565234	0.0592405	0.00162075	0.0540806	0.00803166	0.0358947	0.00828261	0.0402653	0.0039008	0.0386456	0.00247673	2.73e-05	0.0001665
2.7.3.9	0.0997533	0.00452099	0.0790827	0.00427826	0.0835286	0.00402244	0.0991951	0.0072517	0.11264	0.00937041	0.088312	0.00244408	2.736e-05	0.0001667
6.3.2.60	0.00036257	0.000106495	2.5031e-05	3.33628e-05	0.000318668	0.000224018	9.62765e-06	1.54381e-05	7.41308e-05	3.35741e-05	4.75265e-05	1.87091e-05	2.741e-05	0.0001667
3.2.1.141	0.0363784	0.00190364	0.0155173	0.00362953	0.0285597	0.00347484	0.0260624	0.0024422	0.0326263	0.0007156	0.0312943	0.00151557	2.745e-05	0.0001667
1.1.1.237	0.0117323	0.00186258	0.0109689	0.000806841	0.00812299	0.00121392	0.00755551	0.00139464	0.00577236	0.000570513	0.00643768	0.000419639	2.749e-05	0.0001667
5.3.1.4	0.0233303	0.00277845	0.014116	0.00284905	0.0193845	0.00147339	0.0135327	0.00366388	0.0223871	0.000973886	0.0130112	0.000837592	2.753e-05	0.0001667
6.4.1.8	0.00290034	0.000651658	0.00154859	7.93929e-05	0.000465444	0.000301745	0.00151146	0.000759384	0.00124923	0.000242367	0.000760371	0.000228574	2.766e-05	0.0001671
1.1.1.3	0.0761152	0.00240311	0.0873813	0.00216466	0.0936469	0.00711805	0.0859885	0.00430084	0.0795203	0.00253014	0.0826903	0.00174512	2.771e-05	0.0001671
4.2.1.12	0.0104707	0.00172151	0.0196988	9.60529e-05	0.0146275	0.000973509	0.0158234	0.00324831	0.0080329	0.00147844	0.0089957	0.00069304	2.774e-05	0.0001671
4.99.1.2	0.00610227	0.000589321	0.00315685	0.000367981	0.00215422	0.00102222	0.00161461	0.00073451	0.000558871	0.000322834	0.00117479	0.000350846	2.786e-05	0.0001671
1.1.1.83	0.0164125	0.00203154	0.0145698	0.00154575	0.012817	0.00126167	0.0136127	0.00183575	0.010539	0.000765132	0.00923493	0.000757878	2.789e-05	0.0001671
1.1.1.93	0.0164125	0.00203154	0.0145698	0.00154575	0.012817	0.00126167	0.0136127	0.00183575	0.010539	0.000765132	0.00923493	0.000757878	2.789e-05	0.0001671
4.1.1.73	0.0164125	0.00203154	0.0145698	0.00154575	0.012817	0.00126167	0.0136127	0.00183575	0.010539	0.000765132	0.00923493	0.000757878	2.789e-05	0.0001671
3.5.1.124	0.0237231	0.00163215	0.0205236	0.00127298	0.0331125	0.00303671	0.027676	0.00269671	0.0355175	0.00196961	0.0314933	0.00489677	2.794e-05	0.0001671
3.2.1.82	0.00148037	0.000293876	0.00101819	4.76754e-05	0.0007376	0.000316873	0.000696634	0.000197876	0.00256301	0.000953407	0.000712266	0.000291097	2.803e-05	0.0001671
3.2.1.135	0.0357398	0.00397532	0.0469204	0.000622649	0.064353	0.0106499	0.0441065	0.00665789	0.053272	0.00570581	0.0512756	0.0012015	2.815e-05	0.0001671
3.2.1.23	0.177125	0.0203928	0.147413	0.0143682	0.184428	0.0248468	0.125085	0.0198579	0.224472	0.0280572	0.127755	0.00577456	2.817e-05	0.0001671
3.5.4.25	0.0711613	0.00268801	0.0807106	0.00138217	0.0727626	0.0025936	0.0812614	0.00389429	0.06915	0.00153793	0.0780435	0.00185155	2.822e-05	0.0001671
2.1.1.178	0.00143707	0.000296173	0.00231802	0.000144446	0.00591405	0.00282859	0.0037599	0.00101655	0.00610334	0.000648584	0.00458177	0.00035511	2.826e-05	0.0001671
1.14.99.1	0.000581288	0.000208909	1.41313e-05	2.44762e-05	0.000255066	0.000204414	0.000364943	0.000190967	1.47406e-05	2.42798e-05	0	0	2.829e-05	0.0001671
3.1.4.50	0.00153652	0.00020233	0.00100276	0.000126886	0.00159115	0.000421798	0.00096842	0.000317852	0.000749227	9.10602e-05	0.00265692	0.000444913	2.834e-05	0.0001671
2.1.3.9	0.0162769	0.00117357	0.0234821	0.000519778	0.0184137	0.00124989	0.022431	0.000666056	0.0214946	0.00160346	0.0169292	0.00166005	2.836e-05	0.0001671
2.4.1.21	0.0573797	0.00332836	0.0739521	0.000123606	0.0633358	0.00459543	0.0686582	0.00433557	0.0750103	0.00342847	0.0570289	0.0034578	2.84e-05	0.0001671
5.3.2.6	0.0115992	0.00108747	0.00733542	0.000353928	0.0095425	0.00116787	0.00927469	0.00064872	0.0131694	0.00112655	0.00830949	0.000937907	2.84e-05	0.0001671
2.7.1.231	0.00642613	0.000887133	0.00163546	7.09193e-05	0.00499508	0.00111997	0.00285369	0.000543992	0.00284684	0.000666308	0.00240819	0.00035082	2.84e-05	0.0001671
3.2.1.164	0.000605656	0.00028533	4.23265e-05	5.17499e-05	0.000270897	0.000210486	0	0	0.000193153	0.000143303	0	0	2.84e-05	0.0001671
2.7.1.211	5.84854e-05	6.13777e-05	0.00058468	0.000328573	0.000140708	0.000127321	0.000132795	6.83602e-05	0.000526559	0.000206852	0.00284496	0.00206292	2.842e-05	0.0001671
2.1.1.289	0.0126759	0.00106641	0.00703683	0.000857246	0.00994237	0.00140869	0.0129831	0.00217502	0.007181	0.000840437	0.00692633	0.000346172	2.846e-05	0.0001671
2.7.2.4	0.0886026	0.00233951	0.11437	0.00381912	0.1096	0.0116938	0.105591	0.00507264	0.0938421	0.00505722	0.0976368	0.00300835	2.853e-05	0.0001672
2.7.1.35	0.0124529	0.000986149	0.00492923	0.000335052	0.00928148	0.00173332	0.00782144	0.00131639	0.00671312	0.000731847	0.00862385	0.000917955	2.856e-05	0.0001672
1.14.15.21	0.00042906	6.74008e-05	4.56362e-05	1.79324e-05	0.000479396	0.000169338	6.61401e-05	5.34595e-05	3.01965e-05	5.94842e-05	0.000210716	9.82198e-05	2.862e-05	0.0001673
3.4.21.107	0.27406	0.00779818	0.219994	0.00525763	0.250835	0.0153891	0.231096	0.0150901	0.234115	0.0084905	0.208651	0.00457515	2.871e-05	0.0001675
1.2.1.54	0.00301201	0.000412798	0.00606165	0.000588385	0.00588328	0.000886714	0.00350168	0.000760937	0.00239213	0.000293049	0.00588603	0.000555176	2.872e-05	0.0001675
2.4.1.173	0.0209162	0.00225992	0.0186245	0.00125996	0.0303126	0.00177752	0.0154965	0.00372996	0.0145792	0.00184376	0.0163922	0.00118029	2.876e-05	0.0001675
1.16.9.1	0.000876381	0.000195695	0.000616489	8.6032e-05	0.000194122	0.000149311	0.000267654	0.000197154	0.000362013	0.000172198	0.00110906	0.000175687	2.889e-05	0.0001679
4.1.1.68	0.019009	0.000891784	0.0127434	0.000995557	0.0137764	0.0028676	0.0129429	0.00106875	0.0128152	0.00119165	0.0231299	0.00097521	2.892e-05	0.0001679
3.5.2.6	0.0583731	0.00183682	0.0759412	0.00636304	0.0788685	0.00629426	0.062479	0.00309036	0.0723348	0.0020923	0.0783882	0.00361935	2.897e-05	0.000168
1.3.7.8	0.0407275	0.00605959	0.0636436	0.0058699	0.0245098	0.00185952	0.0239099	0.0113326	0.0178723	0.00384327	0.013059	0.00122688	2.916e-05	0.0001683
3.1.6.2	0.00857822	0.00069112	0.00702741	0.000521553	0.00474749	0.000987722	0.00867801	0.0016007	0.0137849	0.00272795	0.00728971	0.000421051	2.924e-05	0.0001683
1.3.1.54	0.00497501	0.000640492	0.00233571	0.00031769	0.00289955	0.000581107	0.0054162	0.000932267	0.00283967	0.000469758	0.0035438	0.000489288	2.924e-05	0.0001683
1.3.1.106	0.00497501	0.000640492	0.00233571	0.00031769	0.00289955	0.000581107	0.0054162	0.000932267	0.00283967	0.000469758	0.0035438	0.000489288	2.924e-05	0.0001683
4.2.1.136	0.0587929	0.0015042	0.0612279	0.00120203	0.0649288	0.00435462	0.0670256	0.0040422	0.0727329	0.00298142	0.0734692	0.00213318	2.926e-05	0.0001683
4.2.1.159	0.00147039	0.000319365	0.000279932	0.00013898	0.000782587	0.000192134	0.001502	0.000270146	0.00108506	0.000201322	0.000690956	0.000158862	2.926e-05	0.0001683
3.1.3.100	0.0446707	0.00263989	0.0634638	0.00109742	0.0673113	0.010584	0.0525969	0.00394114	0.0667581	0.00385234	0.066961	0.00091976	2.942e-05	0.0001684
2.1.1.132	0.0113428	0.00085736	0.00673959	0.000830522	0.00858508	0.000990153	0.0114159	0.000960332	0.00700056	0.000856918	0.00642364	0.000500063	2.946e-05	0.0001684
4.99.1.4	0.0261419	0.00101756	0.018287	0.000671512	0.0182813	0.00218994	0.0192316	0.0022195	0.0211701	0.00290422	0.0311651	0.00362748	2.947e-05	0.0001684
2.4.1.291	0.00320344	0.000300927	0.00396417	0.000503006	0.00278011	0.000473861	0.00275295	0.000468555	0.00651597	0.000975708	0.0056201	0.000969706	2.952e-05	0.0001684
1.3.1.98	0.0454206	0.00218769	0.0510227	0.000491484	0.0514934	0.0028652	0.0513372	0.00297025	0.0548755	0.00114579	0.0568351	0.00140771	2.953e-05	0.0001684
3.2.1.46	0.000470002	0.000107654	3.82616e-05	4.30487e-05	0.00122469	0.000363352	0.000156183	9.48447e-05	0.000255388	0.000131787	0.000214845	9.86509e-05	2.955e-05	0.0001684
1.11.1.26	0.00593605	0.000861974	0.00736208	0.000873609	0.0128301	0.00274808	0.00496824	0.000956948	0.0119481	0.00307581	0.0115391	0.00278525	2.956e-05	0.0001684
3.2.2.9	0.0194755	0.000871158	0.0114699	0.00105859	0.0125256	0.00116109	0.0139938	0.00181229	0.0133258	0.000863658	0.0199032	0.00286549	2.96e-05	0.0001684
2.1.4.1	0.00411801	0.000382505	0.00630767	0.00127127	0.0028247	0.000452216	0.00661688	0.00176666	0.00528335	0.00034331	0.00422193	0.000354027	2.973e-05	0.0001688
2.5.1.48	0.0426981	0.00165542	0.0463572	0.00436855	0.0520141	0.00341598	0.0560237	0.00303452	0.0443466	0.00289993	0.0563949	0.00158415	2.982e-05	0.0001688
2.8.2.29	0.00140012	0.000338768	0.000703483	0.000258219	0.00138829	0.000389167	0.00269698	0.000447752	0.00354956	0.000728501	0.000983868	0.000218952	2.984e-05	0.0001688
1.1.1.42	0.1031	0.00280729	0.144555	0.00526661	0.137087	0.00441573	0.129293	0.0133142	0.0992664	0.00612697	0.137218	0.00195171	2.988e-05	0.0001688
7.2.1.1	0.0939414	0.00604802	0.154502	0.00453473	0.135524	0.0266276	0.135453	0.0189897	0.115558	0.0132471	0.0837996	0.0094333	2.996e-05	0.0001688
1.1.99.40	0.00162251	0.000330944	0.00271049	0.000250148	0.00297934	0.000483187	0.00393131	0.000836763	0.00317214	0.00049519	0.00439611	0.000597669	2.996e-05	0.0001688
6.1.1.6	0.0926506	0.00242622	0.102927	0.00233346	0.101551	0.00457822	0.0976992	0.00150618	0.0937306	0.00379865	0.118055	0.00183444	2.998e-05	0.0001688
1.14.18.10	2.09496e-05	2.29798e-05	0.00210412	0.000784573	0.000250701	0.000187737	0.000106197	4.62456e-05	0.000125189	6.67123e-05	0.000332937	6.07056e-05	2.998e-05	0.0001688
2.4.99.17	0.0491147	0.00153654	0.0478274	0.00199542	0.0532222	0.00298422	0.0507523	0.00175887	0.0551604	0.00309242	0.0417303	0.000798725	3.006e-05	0.0001688
3.1.4.4	0.0483422	0.00224915	0.0181502	0.0010305	0.0398188	0.00250707	0.0507312	0.0039671	0.0495667	0.00224407	0.0331009	0.0023641	3.006e-05	0.0001688
3.3.2.12	0.00633002	0.000513352	0.0163398	0.00181876	0.010615	0.00270847	0.0122555	0.00216828	0.0108863	0.000739837	0.00798362	0.00100372	3.022e-05	0.0001689
1.2.1.91	0.00633002	0.000513352	0.0163398	0.00181876	0.010615	0.00270847	0.0122555	0.00216828	0.0108863	0.000739837	0.00798362	0.00100372	3.022e-05	0.0001689
1.3.1.72	0.00614382	0.000528509	0.00525337	0.000595386	0.00614622	0.00146284	0.00799152	0.00150755	0.00840026	0.00041646	0.0130109	0.00081657	3.022e-05	0.0001689
1.14.19.3	0.004831	0.000536141	0.00864487	0.00198921	0.00815357	0.0015323	0.00382718	0.000632581	0.00368657	0.000354622	0.00356318	0.000396311	3.025e-05	0.0001689
3.2.1.76	2.2903e-06	6.87091e-06	0.000107724	5.6571e-05	0.000578662	0.000570175	2.20516e-05	2.83292e-05	0.000478986	0.000221295	1.2659e-05	1.667e-05	3.032e-05	0.000169
2.4.1.280	0.0025959	0.000502484	0.0036449	0.00128641	0.00521996	0.000776367	0.00394159	0.00189416	0.00851203	0.00166487	0.0108596	0.000849175	3.039e-05	0.000169
2.7.1.197	0.00570441	0.00157098	0.00396993	0.00321689	0.00740871	0.00173389	0.00206514	0.00040551	0.0021532	0.000559432	0.0134729	0.00185156	3.05e-05	0.000169
1.14.12.10	0.00421396	0.00083627	0.00295031	0.000219984	0.00349126	0.000490946	0.00205772	0.000646316	0.00186202	0.000462253	0.0060018	0.00200969	3.051e-05	0.000169
1.3.7.12	3.13035e-05	2.61481e-05	2.85367e-05	3.30551e-05	0.000103601	0.000109329	0.000500316	0.00015874	0.000478226	0.000100745	0.000780022	0.000208758	3.054e-05	0.000169
3.6.1.27	0.0848264	0.00211179	0.0820766	0.00163492	0.0899759	0.00599903	0.0803613	0.00736372	0.0998299	0.00163442	0.114664	0.00726143	3.059e-05	0.000169
2.3.1.35	0.0455007	0.00111669	0.0391465	0.00172378	0.0416326	0.00196834	0.0439445	0.00119365	0.0466268	0.00263753	0.0536324	0.00217813	3.06e-05	0.000169
4.1.1.55	0.0229057	0.0026445	0.0134403	0.00153447	0.00784903	0.00338674	0.00806961	0.00135058	0.00843644	0.00174237	0.00447007	0.000649609	3.065e-05	0.000169
3.5.1.2	0.0599568	0.0037391	0.0441909	0.00117806	0.0520468	0.00232376	0.0621638	0.00158159	0.060146	0.00295018	0.0691241	0.00100115	3.07e-05	0.000169
2.4.1.346	0.0434928	0.00154384	0.0316346	0.0017555	0.0400695	0.00444008	0.0471116	0.00371854	0.0515238	0.00280946	0.0557425	0.00199908	3.072e-05	0.000169
3.1.1.106	0.0315662	0.00140425	0.0237659	0.00139943	0.0254874	0.0016348	0.028658	0.002374	0.0359473	0.0048164	0.0274616	0.00135856	3.072e-05	0.000169
3.1.3.10	0.0125119	0.00161883	0.0129356	0.00187591	0.0188202	0.00292632	0.0088983	0.00129731	0.0141116	0.000401573	0.0107642	0.000905383	3.074e-05	0.000169
2.5.1.3	0.0410984	0.002519	0.0305086	0.00104093	0.0327642	0.00186534	0.0346196	0.00424728	0.0362373	0.00241921	0.027016	0.00161762	3.087e-05	0.0001695
1.14.19.55	0.000959373	0.000212667	0.00176624	0.00068909	0.00120501	0.000422328	0.00055995	0.000260847	5.52198e-05	4.5484e-05	9.00558e-05	7.32303e-05	3.095e-05	0.0001696
1.14.13.9	0.0035571	0.000703091	0.00711329	0.00136615	0.00572507	0.00203217	0.0118401	0.00304817	0.00733663	0.0017495	0.00422397	0.00104174	3.099e-05	0.0001696
4.3.2.2	0.0762676	0.00178123	0.0854934	0.00267572	0.0832245	0.00250848	0.0797754	0.0035887	0.0790132	0.00181033	0.089595	0.00159388	3.101e-05	0.0001696
2.7.11.1	2.9659	0.146844	1.99673	0.0433647	2.33532	0.395266	2.05393	0.209953	2.07674	0.16417	1.62834	0.0614575	3.123e-05	0.0001704
4.1.3.34	0.0459243	0.00211541	0.0392716	0.00123447	0.0348373	0.0033273	0.0395423	0.00289373	0.0420928	0.00125209	0.0464568	0.00187202	3.123e-05	0.0001704
1.1.1.127	0.045061	0.00129881	0.0386923	0.00164367	0.035098	0.00488112	0.0351353	0.00172166	0.0422652	0.00207588	0.033302	0.00155654	3.128e-05	0.0001704
4.1.2.48	0.0480291	0.00219137	0.0525023	0.00115675	0.0530329	0.00136608	0.0458577	0.00393589	0.055433	0.00244223	0.0498887	0.00121205	3.142e-05	0.000171
1.2.1.10	0.0205141	0.0015682	0.0119564	0.00173586	0.0150736	0.0031865	0.0112637	0.000704708	0.0119283	0.000832107	0.0192934	0.00374943	3.169e-05	0.000171
2.5.1.17	0.0505934	0.00138467	0.0581158	0.00332938	0.05033	0.00230068	0.0585185	0.00296393	0.0580021	0.00187773	0.0545802	0.000907165	3.171e-05	0.000171
3.4.19.5	0.0135452	0.00154014	0.020267	0.0016281	0.0241182	0.00584385	0.0214488	0.00152043	0.0235184	0.00139108	0.0183884	0.00167225	3.172e-05	0.000171
1.3.1.62	0.0109059	0.000992836	0.00887915	0.000871283	0.00769557	0.000965444	0.00806008	0.0005383	0.00676711	0.00122109	0.00967145	0.000187892	3.178e-05	0.000171
1.5.1.21	0.00110271	0.000260063	0.00186397	0.000578484	0.00192217	0.000561048	0.00303228	0.000774097	0.00259078	0.000482589	0.00116432	0.000216485	3.178e-05	0.000171
1.11.2.4	0.0021396	0.000212207	0.000397754	0.00010486	0.00204458	0.000521248	0.00099356	0.000259332	0.00110248	0.000167466	0.00089884	0.000418231	3.179e-05	0.000171
1.5.3.25	0.000622306	0.000113389	0.000846462	0.000114986	0.00100403	0.000161036	0.00147083	0.000177594	0.0011507	0.000370134	0.00163771	0.000267881	3.179e-05	0.000171
1.5.3.24	0.0596709	0.00521444	0.0565209	0.0034411	0.0510331	0.0048158	0.070329	0.0221336	0.0444769	0.00130069	0.0377051	0.00279992	3.184e-05	0.000171
3.1.1.4	0.0109325	0.00213872	0.0182933	0.000884589	0.0177206	0.00242622	0.0199575	0.00257679	0.0235432	0.00122493	0.0174937	0.0015339	3.184e-05	0.000171
2.8.1.13	0.0565597	0.00260281	0.0653801	0.0036753	0.0618946	0.00286477	0.0672843	0.00361283	0.0717096	0.00224588	0.062965	0.00228083	3.186e-05	0.000171
2.1.3.16	0.000734992	0.000217679	0.000145684	0.00010289	0.000724791	0.000233236	0.000176243	0.000144798	3.07999e-05	2.85758e-05	0.000142422	6.19047e-05	3.187e-05	0.000171
2.6.1.88	0.00581822	0.00104702	0.0192784	0.00168629	0.0124093	0.0028286	0.0112646	0.000956401	0.00973401	0.000876589	0.00999985	0.000652164	3.192e-05	0.000171
5.4.99.64	0.00126944	0.000567825	0.00225733	0.000523605	0.000849512	0.000649331	0.000207102	0.000164017	2.09018e-05	2.51042e-05	8.92818e-05	3.67993e-05	3.2e-05	0.000171
2.1.1.104	0.0332118	0.00157954	0.0267717	0.00296813	0.024419	0.00164898	0.0250589	0.00161071	0.0280041	0.00214701	0.0216638	0.00235731	3.202e-05	0.000171
2.9.1.3	0.00402812	0.000898262	0.0101473	0.00163865	0.0075937	0.00250399	0.00843078	0.00134522	0.010883	0.00126539	0.00555172	0.000800059	3.203e-05	0.000171
1.16.1.1	0.0232417	0.000445494	0.0166005	0.00185244	0.019566	0.00168941	0.0224545	0.00138754	0.019261	0.000979135	0.0211156	0.00102944	3.214e-05	0.0001711
1.13.11.39	0.00360983	0.000450486	0.000543308	0.000196517	0.00132026	0.000291827	0.000877852	0.000159161	0.000838801	0.000270972	0.000756484	0.000147559	3.214e-05	0.0001711
2.4.1.52	0.00405321	0.000722574	0.00188135	8.44602e-05	0.00317091	0.000289346	0.00235634	0.000496807	0.00278491	0.000435054	0.00467752	0.000676537	3.219e-05	0.0001711
1.13.11.91	0.00771794	0.00111119	0.00479442	0.000606938	0.00322384	0.00096033	0.00569893	0.000891955	0.00436916	0.000375657	0.00436301	0.000581254	3.232e-05	0.0001711
3.5.2.2	0.0556599	0.00154233	0.0548958	0.00101224	0.0506712	0.00457825	0.0513574	0.00510746	0.0413895	0.00174112	0.0350733	0.0015726	3.236e-05	0.0001711
3.4.13.4	0.0122462	0.00150825	0.00970724	0.000473145	0.00795923	0.00215257	0.0072038	0.00094646	0.00764534	0.000545632	0.00653852	0.000214524	3.236e-05	0.0001711
2.7.1.46	0.00382996	0.000489661	0.00241746	0.000476188	0.00255697	0.000582076	0.00389665	0.000990053	0.00636381	0.000376774	0.00215234	0.000415306	3.237e-05	0.0001711
3.1.6.13	0.0528713	0.00345087	0.0408391	0.00791444	0.0587624	0.00524772	0.0656486	0.008368	0.0731361	0.0129159	0.0440075	0.00247649	3.24e-05	0.0001711
3.1.4.55	0.0187484	0.00119237	0.0202697	0.000945544	0.0206483	0.00293471	0.0143341	0.00101219	0.0153112	0.00176879	0.0128231	0.000857255	3.24e-05	0.0001711
1.14.11.30	0.00117898	0.000251128	0.00410559	0.000359193	0.00178477	0.000295472	0.00222974	0.000710124	0.00186246	0.000250275	0.000665207	0.000183578	3.251e-05	0.0001714
4.2.1.180	0.0263373	0.00224546	0.0077383	0.000831431	0.0101972	0.00443692	0.0102593	0.000801108	0.0131014	0.00143128	0.011839	0.000532605	3.258e-05	0.0001716
2.1.1.222	0.0669012	0.00204456	0.0709952	0.0027197	0.0757589	0.00423703	0.0751221	0.00241579	0.094313	0.00431281	0.0769891	0.00149974	3.267e-05	0.0001716
5.1.3.18	0.006399	0.000932093	0.00369835	0.00096629	0.00446965	0.000398737	0.00543541	0.000850838	0.00679562	0.000414153	0.00363061	0.000354428	3.272e-05	0.0001716
5.4.1.3	0.0040977	0.000464082	0.00203616	0.00026829	0.0029062	0.000458692	0.00597354	0.00093311	0.00466391	0.000853508	0.0051314	0.000528845	3.272e-05	0.0001716
5.5.1.16	0.00122406	0.000419407	0.00101633	0.000112293	0.00183342	0.000390132	0.00041942	0.000255724	0.000319959	0.000158244	0.000341166	0.000123325	3.284e-05	0.0001721
2.4.1.66	9.31554e-06	2.01999e-05	0	0	0	0	0	0	0.000134115	8.62354e-05	0	0	3.306e-05	0.0001728
1.14.99.56	0.000287849	0.000169603	1.32186e-05	2.28952e-05	5.94251e-05	8.64014e-05	0	0	0	0	0	0	3.311e-05	0.0001728
4.2.1.82	0.018784	0.000699051	0.0115578	0.000169844	0.0163374	0.00207802	0.0127023	0.000389346	0.0137449	0.00142013	0.011802	0.000978506	3.314e-05	0.0001728
3.2.1.10	0.00722759	0.00155923	0.00667037	0.000909283	0.00760274	0.00075396	0.0109699	0.00232564	0.010397	0.00114969	0.0175356	0.00228154	3.325e-05	0.0001728
1.8.2.2	0.0132841	0.000975931	0.0153777	0.00171304	0.0107535	0.000781808	0.0123862	0.000664383	0.0191687	0.00391666	0.0110781	0.000980538	3.33e-05	0.0001728
2.7.1.25	0.0652929	0.0026364	0.0626343	0.00136698	0.0738678	0.00537297	0.0551138	0.00408171	0.0593791	0.00335946	0.0655342	0.00211728	3.334e-05	0.0001728
2.3.1.312	0.0153401	0.00092985	0.0172403	0.000493072	0.0142631	0.00151074	0.0251082	0.00199202	0.0188037	0.00136272	0.0151411	0.00093352	3.341e-05	0.0001728
5.4.99.8	0.000533618	0.000108507	0.000108816	0.00010662	0.000337066	0.000253726	0.000775032	0.000144913	0.000990157	0.000121597	0.000218037	4.14377e-05	3.343e-05	0.0001728
3.5.1.24	0.0268329	0.00175213	0.0090813	0.00125224	0.0161655	0.00333606	0.0248605	0.00369932	0.0479689	0.00591086	0.0261616	0.000651465	3.349e-05	0.0001728
2.8.2.33	0.00227654	0.000305084	0.000769276	2.71451e-05	0.00130933	0.000500171	0.00313355	0.000775265	0.00301074	0.000493826	0.0018836	0.000216576	3.35e-05	0.0001728
3.1.1.120	0.0308246	0.00170018	0.0177615	0.000801828	0.0202107	0.00333761	0.0207672	0.00136504	0.0213762	0.0017791	0.0148921	0.000841958	3.356e-05	0.0001728
2.1.1.4	0.00400847	0.000470973	0.00135143	7.80709e-05	0.00143973	0.000763929	0.00132819	0.000343307	0.00173821	0.000398966	0.000536138	0.000124167	3.372e-05	0.0001728
1.8.1.18	0.017725	0.00252681	0.0135473	0.00215974	0.0166972	0.00237994	0.0253543	0.00609752	0.0359996	0.00554721	0.0324547	0.00142489	3.375e-05	0.0001728
2.1.1.302	0.0137949	0.000717613	0.00894237	0.000801116	0.00716482	0.00157069	0.0104731	0.00247544	0.0134728	0.00154764	0.00662861	0.00045428	3.375e-05	0.0001728
1.7.2.9	0.000564081	0.000302066	0.000206466	0.000119611	0.000156323	9.85271e-05	6.74917e-05	8.34466e-05	0.000185263	1.89072e-05	3.61523e-06	5.62866e-06	3.379e-05	0.0001728
4.6.1.12	0.0275669	0.000897543	0.0326962	0.00180018	0.0276835	0.00255112	0.0286835	0.00218299	0.0339269	0.000808819	0.0372921	0.00140374	3.38e-05	0.0001728
1.5.1.10	0.00233076	0.000673018	0.00873933	0.00136465	0.00826159	0.00444499	0.00563628	0.00134063	0.011299	0.00286779	0.0056655	0.000674661	3.381e-05	0.0001728
2.1.1.377	0.00390299	0.000803409	0.00353652	0.000676154	0.00708841	0.0024574	0.00653108	0.00258532	0.0114404	0.00156291	0.00300995	0.000322925	3.384e-05	0.0001728
2.1.1.246	0.00390299	0.000803409	0.00353652	0.000676154	0.00708841	0.0024574	0.00653108	0.00258532	0.0114404	0.00156291	0.00300995	0.000322925	3.384e-05	0.0001728
4.2.1.161	0.0018073	0.000340177	0.00244434	0.00046503	0.0042054	0.000868107	0.00551319	0.00151951	0.00550586	0.000484809	0.00614011	0.000488095	3.384e-05	0.0001728
2.6.1.1	0.130837	0.00346063	0.154742	0.00424722	0.149179	0.00500715	0.133868	0.00185715	0.139468	0.00769771	0.127409	0.00222819	3.39e-05	0.0001728
1.1.1.35	0.157854	0.00426067	0.192284	0.000478468	0.162292	0.00458427	0.180736	0.0117336	0.155993	0.00603686	0.173207	0.0038163	3.396e-05	0.0001728
3.2.1.197	0.0019009	0.000145254	0.00829956	0.00167392	0.00607843	0.00165227	0.00354581	0.00120394	0.00549109	0.0013126	0.00431854	0.000371279	3.404e-05	0.0001728
3.4.21.88	0.046808	0.00145952	0.0529108	0.00378084	0.0482223	0.00207991	0.0509458	0.00194641	0.0577982	0.00256069	0.0572908	0.00259684	3.405e-05	0.0001728
6.3.1.20	0.018775	0.000902469	0.016091	0.0010212	0.0244155	0.00409157	0.0163351	0.00145094	0.0261093	0.00218021	0.0171774	0.000899037	3.405e-05	0.0001728
3.5.1.122	4.5221e-05	5.0468e-05	0.000133311	9.5747e-05	0.000315191	0.000206044	0.000344628	0.000215894	0.000991146	0.000363729	0.000935607	0.000136284	3.407e-05	0.0001728
6.3.4.4	0.0621049	0.00142171	0.0689304	0.000791363	0.0697797	0.00387321	0.0672704	0.00239432	0.0643161	0.00147453	0.0741765	0.0013484	3.414e-05	0.0001728
3.1.1.85	0.0136025	0.000719343	0.0111398	0.00164965	0.0136214	0.00105557	0.0180849	0.00209999	0.0208301	0.00163155	0.0193546	0.00207265	3.426e-05	0.0001728
3.6.1.58	0.00794866	0.000905613	0.00855236	0.00129516	0.0116175	0.0017098	0.0120155	0.00266608	0.012632	0.00158167	0.0200031	0.00149987	3.426e-05	0.0001728
1.17.8.1	0.0098685	0.00146881	0.00757717	0.000858618	0.00842958	0.000716286	0.00450141	0.00176111	0.00488025	0.000413176	0.00539742	0.000415566	3.43e-05	0.0001728
6.2.1.17	0.0375389	0.00214506	0.04521	0.000722238	0.0429473	0.0016113	0.0469922	0.00677305	0.0363402	0.00322203	0.0515016	0.00215896	3.433e-05	0.0001728
1.14.12.24	0.00106383	0.000251675	7.63013e-05	6.43928e-05	0.000204181	0.000179987	7.93494e-05	8.82959e-05	0.000513577	0.000181711	0.000264553	5.68035e-05	3.439e-05	0.0001728
1.14.12.23	0.00106383	0.000251675	7.63013e-05	6.43928e-05	0.000204181	0.000179987	7.93494e-05	8.82959e-05	0.000513577	0.000181711	0.000264553	5.68035e-05	3.439e-05	0.0001728
1.14.12.12	0.00106383	0.000251675	7.63013e-05	6.43928e-05	0.000204181	0.000179987	7.93494e-05	8.82959e-05	0.000513577	0.000181711	0.000264553	5.68035e-05	3.439e-05	0.0001728
2.1.1.163	0.184668	0.00348405	0.139057	0.0063458	0.146195	0.00974676	0.149765	0.0108043	0.166594	0.00624351	0.149834	0.00270298	3.446e-05	0.0001728
2.3.1.1	0.088636	0.00250153	0.0827906	0.00280344	0.0863836	0.00198953	0.0893982	0.00336443	0.100194	0.0057424	0.114783	0.0020443	3.449e-05	0.0001728
2.7.4.31	0.00437298	0.000325651	0.0021899	0.000344412	0.00495983	0.000894819	0.00274885	0.000163259	0.00490654	0.000733177	0.00307887	0.000502629	3.454e-05	0.0001728
2.1.1.201	0.185126	0.00345477	0.139145	0.00636486	0.146657	0.00996589	0.14988	0.0108105	0.166722	0.00622093	0.149956	0.00268729	3.455e-05	0.0001728
5.4.99.61	0.00709966	0.000669248	0.00426121	0.000630498	0.006462	0.0006568	0.010621	0.00170893	0.00582871	0.000900502	0.00550575	0.000315546	3.463e-05	0.0001728
5.4.99.60	0.00709966	0.000669248	0.00426121	0.000630498	0.006462	0.0006568	0.010621	0.00170893	0.00582871	0.000900502	0.00550575	0.000315546	3.463e-05	0.0001728
2.7.8.20	0.00495868	0.00079841	0.00784628	0.00087001	0.00986819	0.00201877	0.0093939	0.00246216	0.0157672	0.00102807	0.00904461	0.00206698	3.465e-05	0.0001728
1.13.11.58	0.0182549	0.0011072	0.0204506	0.00133029	0.0191459	0.00148083	0.0245927	0.0024971	0.0258703	0.00175486	0.021435	0.00135836	3.469e-05	0.0001728
3.1.1.32	0.00913274	0.00148196	0.0141971	0.00221664	0.0164357	0.001726	0.0115756	0.00176596	0.0148599	0.000659535	0.0131983	0.000706918	3.476e-05	0.000173
3.2.1.123	0.00467595	0.000543407	0.00286579	0.000601749	0.00531893	0.000868434	0.00228964	0.00049338	0.00223203	0.000882316	0.0054729	0.000406891	3.483e-05	0.000173
1.11.1.6	0.0122147	0.00174282	0.00550161	0.00113763	0.0138871	0.00202418	0.00367046	0.0010673	0.00464328	0.00138481	0.010725	0.00378428	3.49e-05	0.000173
1.8.2.1	0.0104665	0.000559129	0.00785182	0.000482403	0.00675848	0.00181054	0.00657776	0.000863326	0.00775372	0.000873587	0.00516437	0.000217946	3.498e-05	0.000173
3.7.1.3	0.0308259	0.000985543	0.0511019	0.00406254	0.0413323	0.00335056	0.0411468	0.00475813	0.0331793	0.00277717	0.0329331	0.00149436	3.503e-05	0.000173
3.6.4.13	0.371795	0.00896773	0.368981	0.0171723	0.407527	0.0106651	0.428177	0.0253237	0.40866	0.0261442	0.488392	0.00950162	3.505e-05	0.000173
1.5.1.24	0.000503257	0.000202837	0.000729956	4.56796e-05	0.00130775	0.000459663	0.00158875	0.000239764	0.00242394	0.00061801	0.000822082	0.000222344	3.505e-05	0.000173
1.14.13.232	0.00597899	0.000754207	0.00137811	0.000513989	0.0033174	0.00126878	0.00255489	0.000601128	0.00116306	0.000347466	0.00120113	0.000221776	3.51e-05	0.000173
1.8.98.2	0.00220185	0.000544289	0.00149616	0.000349441	0.00101037	0.000413718	0.0017413	0.000521925	0.000526797	0.000255525	0.000512709	0.000111555	3.51e-05	0.000173
2.3.1.308	0	0	0.000107109	3.14296e-05	1.01551e-05	2.48748e-05	0	0	0	0	0	0	3.517e-05	0.0001731
3.2.1.11	0.00200524	0.000417541	0.0006837	0.000205068	0.00169253	0.000638346	0.000492774	0.000306804	0.000825042	0.000223798	0.000512193	6.09198e-05	3.54e-05	0.0001741
1.13.11.93	0.000813381	0.000218782	9.04529e-05	0.000142221	0.00068732	0.000178182	6.62614e-05	0.000112173	5.80851e-05	5.8107e-05	0.000292909	0.000172355	3.545e-05	0.0001741
2.8.3.15	0.0258007	0.00313001	0.0119955	0.0016129	0.00773745	0.0041421	0.00799401	0.00156427	0.0103225	0.00219859	0.00534781	0.000378863	3.569e-05	0.0001744
3.5.1.11	0.0918639	0.00270082	0.100075	0.00351654	0.107686	0.00464868	0.11166	0.00611272	0.106625	0.00285934	0.0909507	0.00370174	3.575e-05	0.0001744
3.5.1.9	0.0804671	0.00139436	0.0701023	0.00519504	0.0730127	0.00599107	0.0645218	0.00380438	0.0573871	0.00283044	0.0672008	0.00361441	3.575e-05	0.0001744
4.2.1.118	0.013011	0.0010639	0.0105106	0.000115373	0.00803743	0.0014484	0.00659896	0.00152809	0.00807917	0.00131148	0.00597942	0.00072723	3.581e-05	0.0001744
7.2.4.1	0.0127429	0.00150599	0.0177811	0.0030469	0.019088	0.00431905	0.0137287	0.000942589	0.0195517	0.0023682	0.0111978	0.00104805	3.584e-05	0.0001744
1.1.1.349	0.000218556	7.46792e-05	0.000736152	0.000106664	0.000703658	0.000353517	0.00053098	8.31193e-05	0.00118073	0.000149906	0.000774718	0.00015382	3.587e-05	0.0001744
3.5.1.92	0	0	0	0	0	0	0	0	0.000126406	0.000130998	0	0	3.599e-05	0.0001744
2.5.1.66	0	0	0	0	0.000109414	0.000149928	0	0	0	0	0	0	3.599e-05	0.0001744
2.7.1.164	0	0	0	0	0	0	0	0	7.43782e-05	0.000115481	0	0	3.599e-05	0.0001744
3.4.21.76	0	0	0	0	0	0	0	0	0	0	6.19109e-05	5.99979e-05	3.599e-05	0.0001744
4.2.1.105	0	0	0	0	0	0	0	0	3.92518e-05	2.74491e-05	0	0	3.599e-05	0.0001744
1.14.15.29	0.0550909	0.0051425	0.0170831	0.000271713	0.0222503	0.00708988	0.0231154	0.00255451	0.0218457	0.00418981	0.0292348	0.000822785	3.601e-05	0.0001744
4.1.1.59	0.00342293	0.00043759	0.0025584	0.000336771	0.000990506	0.000469094	0.00112974	0.000892626	0.00134645	0.000344105	0.000430888	0.000111118	3.616e-05	0.0001745
2.7.1.23	0.0552258	0.00189872	0.0636171	0.00256291	0.0577194	0.00296386	0.0682998	0.00363004	0.0625008	0.00140448	0.0572833	0.000954924	3.62e-05	0.0001745
2.1.1.56	0.00607844	0.00086015	0.00972664	0.000742162	0.00763653	0.00108944	0.0133845	0.00161562	0.0099258	0.00161832	0.00941373	0.00101924	3.62e-05	0.0001745
2.1.1.151	0.00766436	0.000714422	0.00378334	0.000410788	0.00510259	0.000548472	0.00789852	0.00202287	0.00472452	0.000808428	0.00450192	0.000471416	3.624e-05	0.0001745
1.13.11.63	0.000140031	8.77429e-05	0.000355938	0.000110656	0.000447226	0.000234855	0.00125857	0.000617592	0.000411995	8.43259e-05	0.000576399	0.000113758	3.641e-05	0.0001745
4.1.1.46	0.00685294	0.000910122	0.00110675	0.000137778	0.00161369	0.000912598	0.000808104	0.00038891	0.000399315	0.000223098	0.00177348	0.000236217	3.642e-05	0.0001745
3.4.11.21	0.010524	0.000814627	0.00423961	0.000783621	0.00751957	0.00157297	0.00972245	0.00112922	0.0117337	0.00131854	0.00720218	0.000569063	3.645e-05	0.0001745
4.1.1.47	0.00432412	0.000657491	0.00401906	0.000509721	0.00165257	0.000375805	0.00221994	0.000609241	0.00222218	0.000163037	0.00160462	0.000317322	3.653e-05	0.0001745
2.3.1.53	0.010417	0.000935001	0.00646955	0.00148271	0.0124543	0.00255943	0.00735862	0.00124584	0.00877937	0.000989216	0.014113	0.00077571	3.657e-05	0.0001745
3.1.1.61	0.15221	0.00853914	0.100904	0.0184421	0.165313	0.0165398	0.127627	0.0206896	0.106037	0.00869783	0.0981378	0.00236981	3.658e-05	0.0001745
6.2.1.44	0.0793292	0.00604792	0.0632505	0.00321755	0.0591539	0.00583048	0.0683911	0.0181365	0.0393547	0.00485515	0.0506694	0.000815525	3.658e-05	0.0001745
3.13.1.4	0.00665669	0.000895219	0.00259704	0.000178832	0.00405071	0.000596931	0.00399719	0.00247571	0.00172339	0.000196122	0.00218689	0.000328801	3.658e-05	0.0001745
2.7.1.48	0.0296045	0.00294363	0.044162	0.00142454	0.046271	0.00527541	0.032537	0.00671753	0.0451535	0.00604674	0.0376308	0.00130454	3.66e-05	0.0001745
2.7.1.40	0.0904736	0.00203437	0.0958137	0.00330572	0.10201	0.00571094	0.111833	0.00435219	0.104821	0.00411362	0.109429	0.00360163	3.662e-05	0.0001745
4.2.1.75	0.052608	0.00188314	0.04313	0.0047264	0.0504269	0.0030562	0.0453302	0.0019556	0.0501476	0.00125144	0.0576652	0.00234746	3.665e-05	0.0001745
2.7.6.3	0.0439923	0.00146569	0.0499608	0.00184013	0.0468088	0.00425681	0.0471966	0.0020676	0.0559063	0.000996775	0.0555151	0.00136312	3.667e-05	0.0001745
2.4.1.288	0.0028728	0.000670035	0.000872383	0.000126764	0.00268057	0.000972435	0.00378137	0.00121593	0.00522528	0.00053594	0.00746538	0.000673233	3.672e-05	0.0001745
2.3.3.13	0.138565	0.00268996	0.130768	0.00690923	0.132732	0.00933257	0.144297	0.00495312	0.122394	0.00576389	0.158344	0.00510033	3.7e-05	0.0001753
1.13.11.9	0.00331302	0.000211768	0.00119512	0.000229168	0.00220931	0.000667728	0.00265158	0.000890014	0.000963433	0.000119024	0.00186057	0.000326679	3.703e-05	0.0001753
3.5.2.15	0.000724479	0.000428351	0.000417053	0.000206068	0.000474405	0.00016547	0.000130314	0.000133067	1.65568e-06	4.05556e-06	9.1188e-05	0.00010941	3.709e-05	0.0001753
2.1.1.187	0.00208462	0.000292728	0.00124198	0.000335578	0.00211543	0.000330494	0.00100996	0.000376745	0.00171447	0.000242812	0.0038835	0.00225759	3.715e-05	0.0001753
2.3.1.57	0.0456224	0.00364909	0.0646062	0.00645913	0.0654343	0.00408426	0.0461052	0.00810323	0.0517945	0.00265132	0.0683778	0.00263261	3.718e-05	0.0001753
1.14.16.5	0.01498	0.00147955	0.0269454	0.00346726	0.0200614	0.00301688	0.0177147	0.00321453	0.0121276	0.00207059	0.0189331	0.000613504	3.719e-05	0.0001753
4.2.2.5	0.00253171	0.00040936	0.00090992	0.00014671	0.00315849	0.000983254	0.00152405	0.000579136	0.00393705	0.000972268	0.000860952	0.000181868	3.733e-05	0.0001753
2.4.1.213	0.00127309	0.000141041	0.00176361	7.91938e-05	0.00214505	0.00033572	0.00536498	0.00198931	0.00163724	0.000386453	0.00148061	0.000186374	3.735e-05	0.0001753
1.12.5.1	0.00115465	0.000403278	0.002749	0.000793091	0.0024352	0.000479208	0.000699774	0.000496307	0.000326195	0.000175327	0.000301725	8.68699e-05	3.74e-05	0.0001753
1.12.1.2	0.0297205	0.00389868	0.0662335	0.00215852	0.0737333	0.0140616	0.0502157	0.0123843	0.0754762	0.0051714	0.0726409	0.00406187	3.743e-05	0.0001753
5.4.99.27	0.00883711	0.000986341	0.0154376	0.00120413	0.0140512	0.00167748	0.016275	0.00115465	0.017832	0.00181404	0.0140337	0.00139108	3.752e-05	0.0001753
5.4.2.7	0.0130441	0.000881642	0.0227288	0.00277722	0.0147237	0.00183178	0.0145231	0.00304846	0.0109222	0.000775764	0.00943079	0.000351489	3.752e-05	0.0001753
5.1.3.4	0.0170541	0.00193634	0.0104296	0.00120666	0.0125127	0.000994995	0.0103116	0.00318566	0.0169726	0.00108155	0.0105209	0.000429673	3.752e-05	0.0001753
3.5.1.112	0.0013098	0.000121398	0.000755829	0.000280102	0.00122557	0.000207642	0.000320822	0.000196017	0.000898711	0.00027328	0.000300213	9.17739e-05	3.753e-05	0.0001753
3.5.1.113	0.0013098	0.000121398	0.000755829	0.000280102	0.00122557	0.000207642	0.000320822	0.000196017	0.000898711	0.00027328	0.000300213	9.17739e-05	3.753e-05	0.0001753
1.14.19.30	2.04331e-06	6.12993e-06	5.59376e-05	3.12139e-05	0	0	0.000110318	6.51163e-05	9.54085e-05	6.98346e-05	2.30904e-05	2.35945e-05	3.756e-05	0.0001753
2.4.1.305	0.000242439	0.000134049	0.00024155	0.000139302	3.25913e-05	4.56374e-05	0	0	0	0	5.16377e-05	3.94328e-05	3.759e-05	0.0001753
2.3.1.277	0.0002781	0.000101696	0	0	4.70924e-05	6.55255e-05	0	0	3.7152e-05	7.0537e-05	6.41064e-05	1.56809e-05	3.765e-05	0.0001753
3.6.5.4	0.0686117	0.00243834	0.0758379	0.00195441	0.0740709	0.00354121	0.0772528	0.00526416	0.065865	0.00291313	0.0818563	0.00225308	3.77e-05	0.0001753
2.6.1.76	0.0235645	0.00225465	0.0167748	0.00143215	0.0201552	0.00222444	0.0219031	0.00703207	0.0132001	0.00115125	0.0112527	0.00186752	3.771e-05	0.0001753
5.5.1.4	0.0462902	0.00122061	0.0440536	0.0015818	0.0399556	0.00453705	0.0447683	0.0018596	0.0415177	0.00155886	0.0575133	0.0025259	3.778e-05	0.0001754
4.1.3.25	0.0231742	0.00166753	0.0149033	0.00313627	0.0181149	0.00257517	0.0245555	0.00242939	0.0216448	0.00208291	0.0320233	0.00124539	3.785e-05	0.0001756
2.4.1.187	0.0204692	0.00132321	0.0174214	0.00116914	0.0197697	0.00178502	0.0285444	0.0100479	0.0284794	0.00238773	0.0240311	0.00106601	3.796e-05	0.0001758
7.1.1.3	0.0194044	0.00188208	0.00395724	0.00165293	0.0069284	0.00292787	0.00903041	0.000974961	0.0177593	0.00106599	0.0117149	0.00412377	3.798e-05	0.0001758
1.4.3.5	0.0309211	0.00124398	0.0418754	0.00436096	0.034026	0.00299461	0.0471376	0.0052694	0.0421663	0.00283312	0.0425252	0.00137927	3.822e-05	0.0001766
1.6.5.10	0.000482836	0.00020804	0.000734426	0.000345811	0.000823403	0.000434576	0.00249439	0.000638987	0.00304571	0.000786014	0.00283506	0.00170971	3.824e-05	0.0001766
3.4.24.16	0.000213983	6.27698e-05	0.000286475	0.000166459	0.000236388	0.000131143	6.32704e-05	6.59579e-05	0	0	0	0	3.828e-05	0.0001766
2.1.1.195	0.00784069	0.000829201	0.00478958	0.000920728	0.00511883	0.000503958	0.0103924	0.00340435	0.00471731	0.000463636	0.00434826	0.000577798	3.838e-05	0.0001768
4.1.1.8	0.0100893	0.00113586	0.00664625	0.000702773	0.0051882	0.00125309	0.00675936	0.00093529	0.00444892	0.00066249	0.00674244	0.000584275	3.861e-05	0.0001776
3.4.19.1	0.0674292	0.0036736	0.0970208	0.00513107	0.0858861	0.00536657	0.0839598	0.00841273	0.080971	0.0103107	0.0625419	0.00295121	3.865e-05	0.0001776
4.2.1.112	0.00343101	0.00053503	0.00278569	0.000323649	0.00145849	0.00026205	0.00397431	0.00119599	0.00470788	0.000487104	0.00178474	0.000409083	3.866e-05	0.0001776
5.1.3.10	0.0135639	0.00142539	0.00865386	0.000272812	0.0165087	0.00219948	0.0094401	0.00218683	0.0118812	0.00109859	0.00917394	0.000340438	3.877e-05	0.0001778
2.7.1.5	0.028038	0.00209995	0.0145232	0.00229913	0.019783	0.00263223	0.016118	0.00377169	0.0276565	0.00205877	0.0171594	0.00064984	3.879e-05	0.0001778
1.3.5.5	0.00228306	0.000505277	0.00208041	0.000214045	0.00386007	0.000624014	0.00423333	0.00135927	0.00140861	0.000277846	0.00177251	0.00023939	3.885e-05	0.0001778
2.1.1.44	0.029079	0.00287442	0.0211403	0.00164385	0.0220625	0.00181703	0.0311745	0.00352395	0.0264294	0.0019398	0.0204728	0.00103216	3.889e-05	0.0001778
7.1.1.6	0.0428718	0.00278822	0.039601	0.00320157	0.0364633	0.00298952	0.0301249	0.00288116	0.0333334	0.00173189	0.0309613	0.00148879	3.898e-05	0.000178
2.3.1.263	0.00199634	0.000491073	0.00344656	0.000765604	0.00422849	0.000778089	0.002736	0.000756604	0.00535326	0.000964721	0.00482965	0.000617018	3.9e-05	0.000178
2.7.6.1	0.0752895	0.00215347	0.084846	0.00312584	0.0847218	0.00151247	0.0772334	0.00465152	0.0717531	0.0016631	0.0810958	0.00156572	3.908e-05	0.000178
1.6.5.2	0.0769676	0.00367669	0.067415	0.00148294	0.0794716	0.00351648	0.0867258	0.00995582	0.0902072	0.00393159	0.100823	0.0043523	3.908e-05	0.000178
5.1.1.17	0.0210818	0.000653139	0.0264586	0.00340872	0.0257647	0.00237099	0.0187862	0.00100868	0.0195446	0.00152791	0.0189273	0.00109272	3.919e-05	0.0001781
1.1.1.146	0.00187385	0.00022263	0.00177194	0.000364506	0.0022547	0.00037415	0.000967298	0.000367645	0.00100512	0.00015781	0.00112401	9.26994e-05	3.919e-05	0.0001781
2.5.1.105	0.0304677	0.00115744	0.0254817	0.000410285	0.0273917	0.00191225	0.03066	0.00504382	0.0495321	0.00607727	0.0232532	0.00145366	3.93e-05	0.0001783
1.2.1.12	0.070308	0.00292233	0.0951382	0.00615795	0.0900808	0.00678784	0.0808004	0.00396079	0.0783859	0.00559547	0.0857747	0.00343052	3.934e-05	0.0001784
4.3.1.14	0.000706442	0.000205924	0.00161375	0.000276414	0.00116235	0.000452074	0.000641813	0.000401927	0.00172031	0.000304817	0.00438998	0.000442742	3.94e-05	0.0001784
4.3.2.11	0.000119902	0.000106214	0	0	0.000123661	0.000106615	0	0	0	0	4.69454e-06	1.14992e-05	3.948e-05	0.0001786
4.1.1.49	0.0549836	0.00142285	0.0648032	0.00500612	0.0605398	0.00306	0.0601826	0.00955997	0.0416596	0.00385452	0.0399495	0.00114439	3.961e-05	0.0001788
2.3.1.36	0.00112943	0.000249228	0.0027899	0.000586772	0.00253295	0.000547847	0.00252563	0.000233321	0.00178943	0.000273961	0.00332527	0.000962389	3.962e-05	0.0001788
3.6.1.18	0.00881529	0.000818333	0.0151194	0.00053679	0.0101382	0.000833564	0.0153995	0.0010332	0.0151232	0.00166121	0.0142327	0.000782238	3.97e-05	0.0001789
3.10.1.1	0.0655888	0.00494481	0.0561302	0.00858314	0.0731784	0.00596973	0.0780129	0.008927	0.0878052	0.0084419	0.0561235	0.00309336	3.975e-05	0.0001789
2.7.1.148	0.0347191	0.00172041	0.0357636	0.00116441	0.034003	0.00189933	0.0370867	0.00170549	0.0424048	0.00191579	0.0453267	0.0018381	3.975e-05	0.0001789
1.7.1.7	0.00595626	0.00082561	0.0114978	0.00123334	0.00880932	0.00128736	0.00695406	0.00096634	0.00668242	0.000892943	0.0160725	0.00157715	3.988e-05	0.0001792
1.6.5.5	0.270937	0.00696113	0.233639	0.00566165	0.20981	0.0211085	0.22309	0.0125259	0.207545	0.0179872	0.233895	0.00502829	3.996e-05	0.0001792
3.4.14.11	0.00179076	0.000345047	0.00484569	0.000697304	0.00562728	0.00117057	0.00544969	0.000702475	0.00537176	0.00127996	0.00361402	0.000181059	3.998e-05	0.0001792
2.4.2.3	0.0125269	0.000899894	0.0163093	0.00083329	0.0172305	0.00251049	0.013333	0.00252075	0.0194602	0.00111285	0.0185452	0.000609365	4.005e-05	0.0001792
2.6.1.122	0.0121757	0.00132933	0.00874194	0.000775197	0.0104275	0.000577324	0.0122123	0.00139277	0.0138344	0.000832274	0.00956483	0.00057566	4.007e-05	0.0001792
4.99.1.11	2.50933e-05	2.12799e-05	0.000198333	3.09849e-05	0.00102238	0.000673382	3.33182e-05	3.81931e-05	4.92198e-05	2.76632e-05	0.000320361	0.000175969	4.012e-05	0.0001792
4.1.1.86	0.0128601	0.000845941	0.0132771	0.00237986	0.0151008	0.00132708	0.02054	0.00554319	0.0187036	0.00136025	0.0234386	0.000769178	4.015e-05	0.0001792
4.4.1.15	0.00998337	0.000537408	0.0140605	0.000961441	0.00919899	0.000992878	0.0174433	0.002434	0.0153358	0.001152	0.0101893	0.000394806	4.021e-05	0.0001792
1.14.13.251	0.0146707	0.00121712	0.0154106	0.00277647	0.0113929	0.00102053	0.0150301	0.00257762	0.0107965	0.0010642	0.00935905	0.000730902	4.029e-05	0.0001792
4.2.1.2	0.119175	0.00403848	0.127307	0.00164836	0.125848	0.00340078	0.119161	0.00540287	0.113088	0.00393685	0.133352	0.00334883	4.032e-05	0.0001792
1.2.1.68	0.00823857	0.000550545	0.0136426	0.00128602	0.0113724	0.00216668	0.0107873	0.00122193	0.0141145	0.00212131	0.0162072	0.00386121	4.034e-05	0.0001792
6.3.5.2	0.12874	0.00319863	0.147737	0.00161658	0.135691	0.00447062	0.141791	0.0101914	0.128357	0.0021872	0.154363	0.00484762	4.037e-05	0.0001792
1.11.1.19	0.00241304	0.000621181	0.00124519	0.00119959	0.00304038	0.000658164	0.0048634	0.00208764	0.00601908	0.000729629	0.0135747	0.00121988	4.037e-05	0.0001792
1.2.1.19	0.00989525	0.00107018	0.0127662	0.00039334	0.00933942	0.000928892	0.00461933	0.000881091	0.00344591	0.000506026	0.0104614	0.00118328	4.045e-05	0.0001794
3.7.1.9	0.0167058	0.00103275	0.0117798	0.000624553	0.0157446	0.00144519	0.0180753	0.00180135	0.0211273	0.00187249	0.0215994	0.00107239	4.051e-05	0.0001794
2.4.1.379	0.0105864	0.000693097	0.00694031	0.000678576	0.00882968	0.000480018	0.00737859	0.000621065	0.00758331	0.00139791	0.00671536	0.000403986	4.055e-05	0.0001794
3.4.14.5	0.0842853	0.00220061	0.109192	0.00316849	0.10604	0.0117784	0.10739	0.00696575	0.12216	0.0172706	0.0791288	0.00453172	4.064e-05	0.0001794
7.3.2.4	0.0133458	0.00187868	0.00621575	0.00166499	0.00830334	0.0012395	0.00585804	0.00130072	0.00476704	0.00114379	0.00498676	0.000420599	4.069e-05	0.0001794
2.1.1.41	0.00626893	0.00066009	0.00966042	0.0015528	0.00465739	0.00066558	0.00650488	0.000892238	0.00516629	0.000744274	0.00438255	0.000441408	4.073e-05	0.0001794
7.1.1.7	0.104647	0.00367847	0.0729449	0.003308	0.0984884	0.00534538	0.0958495	0.00757573	0.115995	0.00621286	0.112324	0.00684622	4.075e-05	0.0001794
3.5.1.52	0.00338634	0.000465858	0.00145041	0.000377286	0.0016118	0.000361971	0.00284847	0.000433123	0.00346997	0.000614283	0.001887	0.000164944	4.08e-05	0.0001794
2.7.1.201	1.98878e-05	1.7458e-05	0.000289612	0.00013192	0.000219243	0.000159236	4.42776e-06	1.08458e-05	1.0784e-05	1.67083e-05	0.000927988	0.00112728	4.094e-05	0.0001794
1.14.14.151	0	0	0	0	2.67091e-05	6.54236e-05	0	0	0	0	2.12169e-05	1.56702e-06	4.099e-05	0.0001794
2.3.1.78	0.0111156	0.00109397	0.0237034	0.00195083	0.0131323	0.0019907	0.00956459	0.000564395	0.0161546	0.00295976	0.0104744	0.00104794	4.103e-05	0.0001794
3.1.1.57	0.0179763	0.00181784	0.00845235	0.000571652	0.00663179	0.00177669	0.00428105	0.00187248	0.00534908	0.000994363	0.00383322	0.000432037	4.105e-05	0.0001794
1.3.1.10	0.0470278	0.00264586	0.0467313	0.00182081	0.0460391	0.00263162	0.040098	0.00327531	0.0353007	0.00232588	0.0399828	0.00101016	4.106e-05	0.0001794
3.2.1.157	4.56053e-06	1.36816e-05	2.04202e-05	3.53687e-05	0	0	0.000116972	5.61522e-05	0.000238114	9.9042e-05	5.30464e-05	6.28728e-05	4.107e-05	0.0001794
2.4.1.245	0.0313909	0.00383504	0.0169913	0.00117425	0.0171552	0.00345849	0.021965	0.00148307	0.0187644	0.00182032	0.0174365	0.0010539	4.108e-05	0.0001794
1.5.1.1	0.000561123	0.000136905	0.00111305	0.000174261	0.000667833	0.000351678	0.00148769	0.000389149	0.00189518	0.000295614	0.00157881	0.00028143	4.114e-05	0.0001794
3.2.1.4	0.0816736	0.0030298	0.0782937	0.00783827	0.0867443	0.0149578	0.063993	0.00985534	0.123621	0.0146629	0.0666015	0.00404075	4.122e-05	0.0001794
3.5.3.4	0.00407949	0.000747897	0.00593992	0.00163923	0.00262639	0.00079287	0.00502856	0.00222277	0.00142743	0.000174538	0.00128277	0.000865014	4.123e-05	0.0001794
2.7.8.37	0.0099525	0.00107727	0.00398168	0.00103647	0.00748538	0.00105926	0.0104249	0.00261923	0.00588471	0.00109128	0.00761873	0.000488987	4.125e-05	0.0001794
2.6.1.87	0.00737183	0.00133463	0.00454634	0.0002692	0.00431085	0.000594796	0.00349608	0.000650868	0.00483487	0.000580959	0.00360214	0.000275467	4.125e-05	0.0001794
5.3.1.32	0.00982442	0.000913096	0.00758635	0.00116777	0.00921532	0.000973986	0.0111459	0.0019032	0.0130564	0.00103262	0.0166593	0.000722036	4.136e-05	0.0001796
3.3.2.9	0.0033094	0.000420235	0.00188558	0.000200645	0.00122366	0.000331911	0.0019971	0.000916379	0.00085777	0.000221858	0.00158349	0.000164272	4.139e-05	0.0001796
3.5.1.110	0.0256155	0.0020269	0.0102366	0.000800333	0.0130863	0.00224478	0.0117962	0.00146706	0.0102018	0.000679669	0.00912058	0.00100575	4.152e-05	0.0001798
3.1.3.27	0.0183927	0.0011673	0.0229757	0.000778382	0.020705	0.000978522	0.0224558	0.00131971	0.0261716	0.00170615	0.0216898	0.00222833	4.153e-05	0.0001798
3.2.1.155	0.0165162	0.00135346	0.0238329	0.00311411	0.018743	0.00232798	0.017241	0.00106652	0.0242055	0.00375585	0.0138784	0.000770323	4.156e-05	0.0001798
1.17.4.1	0.217327	0.0105518	0.297443	0.00349982	0.257487	0.00518002	0.255507	0.0363688	0.200373	0.0105767	0.262081	0.00377015	4.178e-05	0.0001804
1.8.3.4	0.0294878	0.0021023	0.0159916	0.00052422	0.0191121	0.00362421	0.0186484	0.00670297	0.0110188	0.00105877	0.014114	0.00118745	4.179e-05	0.0001804
1.2.1.50	0.00099578	0.000297254	0.000779416	0.000397586	0.0003044	0.000183719	0.000284973	0.000111746	0.00131452	0.000271064	0.000661235	0.000157304	4.193e-05	0.0001805
2.8.2.21	0.000793425	0.000224827	0.000264016	2.40586e-05	0.000165213	0.000142773	0.000398223	0.0002026	0.000130234	7.6402e-05	6.30742e-05	4.89917e-05	4.204e-05	0.0001805
6.2.1.51	0.00016556	7.61494e-05	0.00011219	0.000129943	1.51375e-05	2.6226e-05	0	0	0	0	0	0	4.204e-05	0.0001805
5.1.3.26	0.00525596	0.000742765	0.00367059	0.000653659	0.0029328	0.000519038	0.00411144	0.00086189	0.00464485	0.000451802	0.0020815	0.000331569	4.209e-05	0.0001805
3.5.4.27	0.00586856	0.00069424	0.00405672	0.000494301	0.00710113	0.00130832	0.00346546	0.000475256	0.00492767	0.000551786	0.00433553	0.000527337	4.214e-05	0.0001805
1.3.3.15	0.0428687	0.00180459	0.0371968	0.00221771	0.0471936	0.00283278	0.0432818	0.00832075	0.0512065	0.00125208	0.058306	0.00146741	4.223e-05	0.0001805
1.3.3.4	0.0428687	0.00180459	0.0371968	0.00221771	0.0471936	0.00283278	0.0432818	0.00832075	0.0512065	0.00125208	0.058306	0.00146741	4.223e-05	0.0001805
6.4.1.6	0.008598	0.00262859	0.00217131	0.000341193	0.00122287	0.00117224	0.000614498	0.000324335	0.000268508	0.000115139	0.000524553	0.000159339	4.226e-05	0.0001805
3.1.3.102	0.0144679	0.000856451	0.0200862	0.00302148	0.0186177	0.00246063	0.0162308	0.00253894	0.0218245	0.00207887	0.0245651	0.00163838	4.23e-05	0.0001805
2.4.1.269	0.000980643	0.000146452	0.00305669	0.000892467	0.000487138	0.000244601	0.000416038	0.000219186	0.000163436	7.37524e-05	0.000475518	6.65305e-05	4.232e-05	0.0001805
3.2.2.4	0.0103617	0.00087968	0.0148137	0.000806222	0.0122771	0.00176127	0.0108867	0.00138126	0.00763111	0.00116248	0.00669845	0.000771591	4.235e-05	0.0001805
3.5.1.118	0.00435153	0.000674746	0.00234517	0.000112504	0.00147364	0.000740828	0.00260035	0.00045306	0.002633	0.000883073	0.00331349	0.000231314	4.237e-05	0.0001805
4.1.2.43	0.00539568	0.000635258	0.00617073	0.000852582	0.00855687	0.00169155	0.00344727	0.000963189	0.0040962	0.000759493	0.00518806	0.000555309	4.24e-05	0.0001805
1.2.1.39	0.0104334	0.000610317	0.00467501	0.00172734	0.0063926	0.00156703	0.00678674	0.00126534	0.00366539	0.000473547	0.00439453	0.000596618	4.249e-05	0.0001805
3.2.1.78	0.027543	0.00159266	0.0178955	0.00219108	0.0246362	0.00215933	0.0206	0.00387612	0.0309278	0.00214344	0.0239274	0.00164491	4.253e-05	0.0001805
1.1.7.1	0.023186	0.00314627	0.0274841	0.00230322	0.0137634	0.00306704	0.0153705	0.00604985	0.0118385	0.00217399	0.00791714	0.000781942	4.253e-05	0.0001805
1.14.19.20	0.00869662	0.000420459	0.00871746	0.00114716	0.0104574	0.000728199	0.00815458	0.00271385	0.00347125	0.000756136	0.00538428	0.000620692	4.254e-05	0.0001805
2.4.1.142	0.00082251	0.000302464	7.52709e-05	0.00010262	0.00024236	0.000130369	7.06508e-05	5.81129e-05	0.000242992	0.000105401	0.000333153	0.000112479	4.257e-05	0.0001805
1.1.98.3	0.0242428	0.0012048	0.0165344	0.00097774	0.0177428	0.00189053	0.0201256	0.00143619	0.0202943	0.00162826	0.0177262	0.00082409	4.269e-05	0.0001806
3.2.1.177	0.0268752	0.00287662	0.0200536	0.00238517	0.0301101	0.00297961	0.0215898	0.00506984	0.0378199	0.00456073	0.0221927	0.00105398	4.27e-05	0.0001806
1.2.1.11	0.0608968	0.00163008	0.0692533	0.0014217	0.0656087	0.00338169	0.0602471	0.00342502	0.0546386	0.00116895	0.0668858	0.00121794	4.273e-05	0.0001806
5.1.99.4	0.0680384	0.004299	0.0508341	0.0023982	0.0513471	0.00569432	0.0596312	0.00406754	0.054905	0.00668658	0.0654712	0.00211526	4.28e-05	0.0001807
4.1.1.98	0.0378333	0.00316822	0.0365906	0.00104725	0.0308506	0.0021301	0.0306682	0.00558777	0.0245319	0.000986249	0.0260016	0.00283059	4.284e-05	0.0001807
2.4.1.19	0.00135183	0.000371792	0.00119665	0.000607469	0.00363454	0.00175024	0.00544941	0.000615309	0.00338038	0.000565013	0.00249394	0.00021311	4.305e-05	0.0001813
2.1.1.79	0.133478	0.00373787	0.11737	0.00222881	0.10583	0.0032065	0.123103	0.0100561	0.124037	0.00772401	0.107951	0.00282171	4.307e-05	0.0001813
1.4.1.23	0.00189106	0.000335155	0.00145776	0.0004501	0.00204632	0.000451583	0.00364309	0.000644999	0.00370925	0.000585271	0.00406719	0.000617026	4.327e-05	0.0001819
1.8.4.15	0.00763487	0.000899249	0.0180312	0.000699833	0.0106215	0.00133679	0.0132524	0.00080814	0.0133292	0.0026409	0.012049	0.000884901	4.331e-05	0.0001819
4.1.2.60	0.000435193	0.00014507	0.000478721	0.000224416	0.000123853	9.49693e-05	0	0	4.59244e-05	7.15304e-05	1.64451e-05	1.83358e-05	4.345e-05	0.0001824
2.7.7.78	0.000153177	0.00013673	0.000181892	5.23854e-05	0.000340084	9.74272e-05	0.000399327	0.000241294	0.00175823	0.000597209	0.000809624	0.000111808	4.353e-05	0.0001825
2.3.1.189	0.0410774	0.00344857	0.0458948	0.00132865	0.0599507	0.00440393	0.044689	0.0119272	0.0524286	0.00512286	0.078268	0.00306885	4.362e-05	0.0001827
4.1.1.74	0.00630644	0.000666415	0.0067983	0.000363424	0.0082641	0.00149509	0.00375331	0.000708965	0.00377619	0.000257587	0.00673023	0.000580529	4.371e-05	0.0001828
3.6.1.45	0.0311709	0.00320275	0.0606149	0.00242228	0.0514972	0.00332637	0.05156	0.0066015	0.0453258	0.00452635	0.0440068	0.0010115	4.374e-05	0.0001828
1.3.1.28	0.00446005	0.000586318	0.00236817	0.000134311	0.00296112	0.000658037	0.00269145	0.000536842	0.00320746	0.000513151	0.00203067	0.00024246	4.381e-05	0.000183
1.3.3.13	0.00391202	0.00050761	0.00257563	0.000335883	0.00424466	0.00109231	0.00198124	0.000471288	0.00305228	0.000595993	0.00181017	0.000254393	4.393e-05	0.000183
2.3.1.271	0.000395285	0.000132229	0.000220252	0.000155362	8.93012e-05	7.47837e-05	0.000300165	0.000163783	0.00118959	0.000194133	7.33182e-05	2.83459e-05	4.393e-05	0.000183
4.3.2.3	0.0129978	0.00111424	0.0127625	0.00140577	0.00936183	0.00140917	0.0118008	0.00304792	0.00617295	0.000737826	0.00619752	0.000778336	4.4e-05	0.000183
1.1.1.404	0.00153999	0.000366222	0.000251745	0.000108715	0.000745121	0.000337209	0.000169619	0.000133571	0.0010975	0.000595835	0.00195215	0.00035694	4.412e-05	0.000183
4.3.2.1	0.0697526	0.00168147	0.0790025	0.00138591	0.0746074	0.0024013	0.0804335	0.00362097	0.0753496	0.00324188	0.0810086	0.00270436	4.419e-05	0.000183
3.1.3.85	0.00967498	0.000947408	0.00932056	0.00094578	0.00798601	0.00163064	0.01275	0.00174956	0.0112516	0.00125056	0.0202343	0.00104036	4.437e-05	0.000183
2.8.2.14	2.91528e-05	4.36392e-05	5.55327e-05	5.82883e-05	0.000560938	0.00020205	0.000408127	0.000214947	0.000650758	0.000214006	0.000171514	0.000116348	4.437e-05	0.000183
3.7.1.28	0.00434383	0.000443087	0.00253433	0.000455395	0.00350292	0.000954498	0.0016088	0.000348322	0.00155068	0.000371536	0.00220951	0.000273604	4.442e-05	0.000183
4.6.1.19	0.00747757	0.000843853	0.00532785	0.000514934	0.00597541	0.000398893	0.00605467	0.000897907	0.00407602	0.000814747	0.0084716	0.00258655	4.449e-05	0.000183
4.2.1.22	0.027003	0.00208705	0.0327062	0.00131869	0.0318709	0.00164495	0.0321355	0.00657052	0.0197071	0.00337531	0.022018	0.00107416	4.451e-05	0.000183
4.1.2.52	0.0454634	0.00371643	0.028838	0.00266025	0.0307724	0.00390842	0.0299443	0.0019565	0.0296914	0.00230206	0.0238445	0.000480648	4.457e-05	0.000183
4.1.2.63	0.00693936	0.000807185	0.00556769	0.00166197	0.00337583	0.00110307	0.00319246	0.000799587	0.00174117	0.000237254	0.0028413	0.000287327	4.458e-05	0.000183
1.5.1.47	0.00228931	0.00046169	0.000779803	0.000604376	0.00120757	0.000390722	0.000456882	0.000174638	0.00097513	0.000130073	0.000607234	9.43807e-05	4.458e-05	0.000183
2.7.7.56	0.0359811	0.00198709	0.0380731	0.00116128	0.0346874	0.00167517	0.0401742	0.00172043	0.039785	0.00287985	0.0480708	0.00165015	4.476e-05	0.000183
3.1.4.43	1.99684e-06	5.99052e-06	0	0	9.22611e-05	0.000118409	0	0	0.000363039	0.000190036	0	0	4.479e-05	0.000183
4.1.1.65	0.0329813	0.00111906	0.0444614	0.00127465	0.0339099	0.00385522	0.0390831	0.0023263	0.0450657	0.000590391	0.0347416	0.0013266	4.482e-05	0.000183
2.3.1.118	0.0151934	0.00113732	0.0109446	0.00147688	0.010097	0.00119929	0.0078813	0.000614033	0.00938127	0.00139542	0.00847089	0.000771836	4.484e-05	0.000183
6.3.2.29	0.0306669	0.00197849	0.0375522	0.00276375	0.0387154	0.00391314	0.0465218	0.00851683	0.0367859	0.00380926	0.0543312	0.00391176	4.485e-05	0.000183
6.3.2.30	0.0306669	0.00197849	0.0375522	0.00276375	0.0387154	0.00391314	0.0465218	0.00851683	0.0367859	0.00380926	0.0543312	0.00391176	4.485e-05	0.000183
2.5.1.149	0.00138651	0.000634907	0.00065974	6.8013e-05	0.000956489	0.000397722	0.000179352	0.000119262	0.000182553	4.34077e-05	0.000199206	9.48297e-05	4.49e-05	0.000183
2.6.1.34	0.000384725	0.000125499	0.000350345	0.000250169	0.000304026	0.00010751	0.00101737	0.000308129	0.000960718	0.000195834	0.00119405	0.000176262	4.491e-05	0.000183
1.1.1.403	0.00289435	0.000366635	0.00172899	0.000350395	0.00166708	0.000273904	0.00180446	0.000149536	0.00113853	0.000350854	0.00193017	0.000190867	4.493e-05	0.000183
3.4.23.51	0.00120375	0.000339699	0.0032102	0.000661778	0.00483408	0.00173216	0.00116003	0.000548781	0.00196899	0.000763026	0.00229726	0.000320641	4.498e-05	0.000183
2.8.2.20	0.0153951	0.000923267	0.0104009	0.000223147	0.0143874	0.00159971	0.0148053	0.00142714	0.0209706	0.0029701	0.0194233	0.00107787	4.5e-05	0.000183
1.1.1.57	0.00717437	0.000665874	0.00417524	0.00123793	0.00492285	0.00131774	0.00200369	0.000441782	0.0042034	0.000827651	0.00455127	0.000348371	4.501e-05	0.000183
1.14.99.15	0.00676142	0.000654734	0.00151159	0.000196313	0.00206882	0.00103175	0.00224665	0.000415366	0.00668438	0.00259596	0.00179258	0.00024004	4.51e-05	0.000183
4.2.1.135	0.0446708	0.000916409	0.0523424	0.000476546	0.0508775	0.00536431	0.0465608	0.00268912	0.0550314	0.00199466	0.057534	0.00448319	4.515e-05	0.000183
2.3.1.279	0.00184643	0.000281469	0.000741085	0.000697833	0.00186266	0.000697914	0.000416183	0.000185714	0.000593498	7.16856e-05	0.00116843	0.000190568	4.518e-05	0.000183
2.3.1.278	0.00184643	0.000281469	0.000741085	0.000697833	0.00186266	0.000697914	0.000416183	0.000185714	0.000593498	7.16856e-05	0.00116843	0.000190568	4.518e-05	0.000183
3.5.1.4	0.170314	0.00896691	0.122271	0.00557157	0.13476	0.0117565	0.158988	0.00491243	0.149866	0.00816544	0.158191	0.00294824	4.522e-05	0.000183
2.1.1.341	0.0134935	0.000922976	0.00568909	0.00144401	0.00489872	0.00214504	0.00375394	0.00107518	0.00455599	0.00129517	0.00156581	0.000233872	4.527e-05	0.000183
3.2.1.28	0.102359	0.00790298	0.0457477	0.00475503	0.0694949	0.00960182	0.0710409	0.00411422	0.0649567	0.00418434	0.072544	0.00196506	4.53e-05	0.000183
2.4.99.21	0.00165857	0.000253868	0.00133009	0.000271552	0.00593772	0.0035196	0.000989363	0.000309113	0.00110244	0.00030326	0.00202454	0.000368666	4.542e-05	0.000183
3.2.1.54	0.0281362	0.00290458	0.0308635	0.000946478	0.0472477	0.00714447	0.0304012	0.00466276	0.0390089	0.00426844	0.0417652	0.00188332	4.543e-05	0.000183
3.2.1.133	0.0281362	0.00290458	0.0308635	0.000946478	0.0472477	0.00714447	0.0304012	0.00466276	0.0390089	0.00426844	0.0417652	0.00188332	4.543e-05	0.000183
6.3.2.20	0.000102474	3.86011e-05	0	0	1.64023e-05	1.40005e-05	2.57062e-06	6.29671e-06	4.20827e-06	4.69073e-06	0	0	4.543e-05	0.000183
3.4.17.21	0.0176898	0.00211559	0.016667	0.00304358	0.00796763	0.00192242	0.00918463	0.00311823	0.00948424	0.000394377	0.0058455	0.000631364	4.546e-05	0.000183
1.14.11.47	0.00464701	0.000865806	0.00589785	0.00074663	0.00562807	0.000963309	0.00757756	0.00087716	0.00932735	0.00182033	0.00830245	0.000482398	4.549e-05	0.000183
1.12.99.6	0.0600976	0.003697	0.115646	0.00505621	0.093785	0.00563204	0.102016	0.00465636	0.101391	0.00581228	0.103584	0.00602816	4.555e-05	0.000183
2.1.1.74	0.0313421	0.0011862	0.0281942	0.00208769	0.0292451	0.00158089	0.0271868	0.00301966	0.0223022	0.00077044	0.0225391	0.000790362	4.556e-05	0.000183
4.2.1.145	0.00317135	0.00036885	0.00385749	0.000925579	0.00207863	0.000407495	0.00227899	0.00041872	0.00435633	0.000434439	0.00267419	0.000292585	4.562e-05	0.0001831
5.3.1.24	0.0479282	0.00126843	0.046031	0.00338467	0.0442737	0.00215205	0.0497417	0.00395812	0.0573428	0.00108211	0.0539769	0.00247566	4.573e-05	0.0001833
2.7.4.25	0.0432448	0.00260214	0.0453242	0.00276291	0.0450964	0.00322131	0.0514455	0.00153065	0.0584568	0.00207576	0.0494383	0.00207007	4.574e-05	0.0001833
4.1.2.13	0.0952972	0.00405218	0.111779	0.00488582	0.108695	0.0049444	0.109127	0.00547341	0.108765	0.00548904	0.134984	0.0063029	4.583e-05	0.0001835
2.4.2.19	0.0329006	0.00118881	0.0298884	0.00108362	0.0330815	0.00292223	0.0391123	0.003666	0.0434277	0.00223852	0.0401888	0.00221082	4.611e-05	0.0001844
3.4.21.111	0.00372242	0.000671195	0.00367262	0.000713093	0.00504917	0.000870083	0.00204036	0.000703015	0.00287202	0.000314642	0.00485554	0.000355659	4.626e-05	0.0001848
2.1.1.5	0.00395317	0.000643359	0.000581851	8.85177e-05	0.00180189	0.000927175	0.00272903	0.00111962	0.0041299	0.000556249	0.00076139	0.000227347	4.633e-05	0.0001849
2.1.1.173	0.0159264	0.00129555	0.0240149	0.00211339	0.0276181	0.00439812	0.0172965	0.00189031	0.0243264	0.00237149	0.0172567	0.00102449	4.655e-05	0.0001851
2.1.1.156	0.013436	0.00102691	0.00980833	0.00124055	0.0097263	0.00133506	0.00878801	0.00112525	0.00865576	0.00112863	0.00703107	0.000584848	4.663e-05	0.0001851
4.1.1.76	0.000688482	0.000199979	0.000153717	9.18134e-05	0.000159904	0.000129882	0.000694164	0.000617895	0.000200167	0.000113157	5.9973e-06	9.42385e-06	4.663e-05	0.0001851
1.1.1.86	0.0633134	0.00185299	0.0672958	0.00198599	0.0661096	0.00289681	0.0658435	0.00334782	0.0549142	0.00277936	0.0771348	0.00104485	4.664e-05	0.0001851
2.7.1.144	0.00380144	0.000887194	0.0023337	0.000425256	0.00290582	0.000417709	0.00199732	0.00038321	0.00436171	0.000682998	0.00210242	0.000346706	4.671e-05	0.0001851
2.1.1.278	0.00213974	0.000315779	0.00089288	3.50478e-05	0.00118356	0.0001578	0.00255103	0.000721979	0.00152908	0.000452894	0.00132832	0.000151262	4.671e-05	0.0001851
2.3.1.310	0.00121367	0.000272548	0.000681	0.000291144	0.000681044	0.000270774	0.00043714	0.000118119	0.000332403	0.000109265	0.000897606	6.024e-05	4.673e-05	0.0001851
1.14.11.52	0.00164849	0.00032213	0.000480866	0.000119688	0.000744212	0.000278069	0.00153686	0.000202045	0.0011756	0.000246295	0.00106938	8.80189e-05	4.674e-05	0.0001851
1.8.99.2	0.0393966	0.00280229	0.0641108	0.0032157	0.0300415	0.00188832	0.0473777	0.0090447	0.0525439	0.00464067	0.0359477	0.00313881	4.682e-05	0.0001851
4.99.1.9	0.043505	0.00162913	0.052432	0.00143548	0.0491469	0.00224444	0.0523435	0.00718261	0.0442279	0.00319224	0.0529928	0.00150846	4.686e-05	0.0001851
4.98.1.1	0.043505	0.00162913	0.052432	0.00143548	0.0491469	0.00224444	0.0523435	0.00718261	0.0442279	0.00319224	0.0529928	0.00150846	4.686e-05	0.0001851
3.7.1.26	0.0530652	0.00335161	0.0407478	0.00192932	0.0392022	0.00533651	0.0315411	0.00488194	0.0320728	0.00213343	0.029989	0.00141473	4.731e-05	0.0001867
3.1.3.12	0.0588993	0.0021467	0.0443814	0.00259869	0.0534999	0.00400387	0.0586875	0.00534405	0.0622872	0.000944024	0.0503805	0.000696547	4.74e-05	0.0001869
5.2.1.12	0.00120058	0.000206839	0.000549389	0.00010922	0.00137303	0.000217442	0.00302718	0.000729235	0.00116186	0.00028646	0.00079569	0.000133196	4.756e-05	0.0001871
1.13.12.19	0.000301599	6.91269e-05	7.89524e-06	1.3675e-05	5.06779e-05	4.89121e-05	0.000239181	0.000259473	0.000134648	5.21707e-05	4.49958e-05	1.38619e-05	4.765e-05	0.0001871
1.14.20.7	0.000301599	6.91269e-05	7.89524e-06	1.3675e-05	5.06779e-05	4.89121e-05	0.000239181	0.000259473	0.000134648	5.21707e-05	4.49958e-05	1.38619e-05	4.765e-05	0.0001871
2.7.1.3	0.00114366	0.000234153	0.00172707	0.000125971	0.000894589	0.000296188	0.00177612	0.000888029	0.00453568	0.00145914	0.00377015	0.0006447	4.768e-05	0.0001871
1.1.1.47	0.0520738	0.00275774	0.0319826	0.000931283	0.0359965	0.00483213	0.0379579	0.000909327	0.03446	0.00268435	0.0318737	0.000939463	4.775e-05	0.0001871
1.1.1.388	0.00186007	0.000182719	0.00232746	0.000148055	0.00293501	0.00095295	0.00299712	0.000191886	0.0060943	0.000801096	0.00243558	0.000151586	4.775e-05	0.0001871
3.4.17.24	0.00117545	0.000330835	0.0047309	0.00144183	0.00485162	0.00155117	0.00394803	0.000705813	0.00397574	0.00115803	0.00275788	0.000408386	4.784e-05	0.0001871
4.3.3.7	0.0999002	0.00290454	0.0955149	0.00286661	0.0841016	0.00432083	0.0874893	0.00514284	0.0822297	0.00207216	0.0813284	0.00133577	4.785e-05	0.0001871
3.5.1.15	0.00120534	0.00035759	0.000811141	0.000260449	0.000758352	0.000218587	0.00227104	0.000470832	0.00112077	0.000173951	0.00038905	8.30366e-05	4.785e-05	0.0001871
1.1.1.335	0.0723358	0.0030276	0.0660756	0.0017995	0.0795146	0.00290538	0.0641375	0.0101568	0.086271	0.00620967	0.0647327	0.00291529	4.802e-05	0.0001875
6.2.1.25	0.0183761	0.00230803	0.014253	0.000525106	0.0118582	0.00173511	0.0135618	0.00393487	0.00942597	0.00118466	0.00854512	0.000615036	4.805e-05	0.0001875
3.1.3.18	0.0740109	0.00257336	0.0883871	0.00290383	0.0762666	0.00289845	0.085936	0.00204397	0.0892068	0.00530062	0.0859825	0.00514039	4.81e-05	0.0001876
2.8.3.16	0.0844539	0.00599455	0.046562	0.000310553	0.0436762	0.00980305	0.0480083	0.00690647	0.0392275	0.00450884	0.0356163	0.00148979	4.833e-05	0.0001883
3.1.6.4	0.0309588	0.00242614	0.0290846	0.00204052	0.0248503	0.00283486	0.0364368	0.00352124	0.0400507	0.00439651	0.029704	0.00298077	4.859e-05	0.0001891
4.1.1.9	0.0162383	0.00187098	0.0117695	0.000416353	0.0115446	0.000928415	0.0141547	0.00299501	0.0106653	0.000775524	0.00966698	0.000764594	4.864e-05	0.0001891
1.3.1.115	0	0	3.19067e-05	1.90963e-05	4.23561e-05	7.68632e-05	0	0	0.000209803	0.000158535	0.00012219	8.08031e-05	4.866e-05	0.0001891
5.3.99.6	0.000680253	0.000225155	5.28298e-05	1.92069e-05	0.000139423	0.000135125	1.62094e-05	1.78526e-05	3.35128e-05	2.00183e-05	0.000202766	9.74756e-05	4.876e-05	0.0001892
1.16.3.1	0.0799471	0.00319921	0.0579137	0.000981048	0.0753221	0.00452999	0.0672136	0.00219425	0.0667515	0.00334038	0.0795563	0.00656694	4.893e-05	0.0001892
6.1.1.2	0.0602986	0.0012017	0.0705361	0.00167827	0.0687486	0.0036033	0.0661417	0.00289952	0.0593717	0.00177046	0.0689552	0.0016646	4.895e-05	0.0001892
3.4.15.6	0.0125719	0.000974825	0.0187653	0.000574119	0.0238443	0.00267586	0.0193935	0.0028077	0.0208089	0.00253172	0.024345	0.00108695	4.902e-05	0.0001892
4.4.1.43	0.00390885	0.00059734	0.00661345	0.000595297	0.00442634	0.000574017	0.00595923	0.00150774	0.00199164	0.00054144	0.00304956	0.000360147	4.902e-05	0.0001892
3.4.24.7	0.000468556	0.000160919	1.9213e-05	3.3278e-05	0.000169627	6.21279e-05	1.31806e-05	1.10716e-05	0.000103293	0.000117076	0.000192948	7.74005e-05	4.906e-05	0.0001892
3.2.1.106	0.00373335	0.000171711	0.00205323	0.00049848	0.00338508	0.000669592	0.00205668	0.000782905	0.00155376	0.000264202	0.00401433	0.000239196	4.912e-05	0.0001892
1.5.1.25	0.00765103	0.000992392	0.00733094	0.000989579	0.00603182	0.00117981	0.00542405	0.00123386	0.00326655	0.000584508	0.00447185	0.000504912	4.916e-05	0.0001892
3.1.1.81	0.0561203	0.00146622	0.0380391	0.00111105	0.0397185	0.00504464	0.0502061	0.00690325	0.0514901	0.00177227	0.0414841	0.00185639	4.926e-05	0.0001892
2.1.1.185	0.0459206	0.00137701	0.0536716	0.00318346	0.0588402	0.00547581	0.0561201	0.00717212	0.0661335	0.00172327	0.0633935	0.00137291	4.928e-05	0.0001892
4.2.1.57	0.00157742	0.000292308	0.00145132	0.000129967	0.00353047	0.000356454	0.00293751	0.00088144	0.0027352	0.000388631	0.00245401	0.000342939	4.93e-05	0.0001892
6.5.1.7	0.0197268	0.00106794	0.0108552	0.00188887	0.0187573	0.00181678	0.0262507	0.00431863	0.0197232	0.00196195	0.0157084	0.000549557	4.933e-05	0.0001892
6.5.1.6	0.0197268	0.00106794	0.0108552	0.00188887	0.0187573	0.00181678	0.0262507	0.00431863	0.0197232	0.00196195	0.0157084	0.000549557	4.933e-05	0.0001892
1.1.1.312	0.0100707	0.000820325	0.00704387	0.00033242	0.00611593	0.00105293	0.00460344	0.00179039	0.00660192	0.00139727	0.00372423	0.000306154	4.942e-05	0.0001892
1.18.1.1	0.0031692	0.00046802	0.00544302	0.00120049	0.00454696	0.000920637	0.00489942	0.00102482	0.00657526	0.00126918	0.0076682	0.00179858	4.943e-05	0.0001892
1.2.1.44	0.00443794	0.000534525	0.00267307	0.000316611	0.00401007	0.000272621	0.00605271	0.0011786	0.00597904	0.000286697	0.0063487	0.0011104	4.943e-05	0.0001892
3.1.1.76	0.00132494	0.000260762	0.000868995	0.000129944	0.00100816	0.000252735	0.00228598	0.000594405	0.001651	0.000510395	0.00329163	0.000473388	4.946e-05	0.0001892
2.6.1.108	0.0192756	0.000817928	0.0243226	0.000560283	0.0196275	0.00220656	0.0239625	0.00197882	0.0229347	0.00226821	0.0275149	0.00118185	4.956e-05	0.0001893
2.1.1.264	0.00991364	0.00153355	0.0114497	0.00110589	0.0147861	0.00141608	0.0106487	0.00132578	0.0154045	0.00129093	0.0147433	0.00112293	4.97e-05	0.0001893
2.7.1.190	0.00402249	0.000533182	0.00204448	0.00101705	0.00411959	0.000382671	0.00329987	0.000916288	0.00627521	0.00105085	0.00599489	0.000544954	4.97e-05	0.0001893
1.14.13.240	0.00682015	0.000678493	0.0154999	0.00130775	0.00985712	0.000768553	0.0141181	0.00173235	0.0136274	0.00283537	0.0133732	0.000868008	4.972e-05	0.0001893
1.1.1.4	0.0351801	0.00180309	0.0192236	0.0016862	0.0200721	0.00305031	0.0216121	0.00345418	0.0298529	0.00369466	0.0193816	0.00128508	4.975e-05	0.0001893
1.1.1.303	0.0351801	0.00180309	0.0192236	0.0016862	0.0200721	0.00305031	0.0216121	0.00345418	0.0298529	0.00369466	0.0193816	0.00128508	4.975e-05	0.0001893
1.1.1.371	0.0154421	0.00167828	0.0148802	0.000977612	0.0165379	0.000907144	0.0212075	0.00389564	0.0265185	0.00115417	0.0247089	0.000808715	4.98e-05	0.0001893
4.2.1.176	0.00261372	0.000375418	0.0012954	0.000461503	0.0016227	0.000480346	0.000774499	0.000376164	0.000608765	0.000356734	0.000661066	0.000133343	5.007e-05	0.0001902
2.1.1.14	0.101127	0.00816658	0.0382867	0.00353787	0.0402611	0.0111973	0.0364624	0.0148767	0.02767	0.00471469	0.02177	0.00183779	5.032e-05	0.0001906
2.1.1.130	0.00827366	0.00071081	0.00395835	0.00045363	0.00566273	0.000703056	0.0080431	0.00203189	0.00496365	0.000911621	0.00509145	0.000538278	5.032e-05	0.0001906
1.2.5.1	0.00904683	0.00110534	0.00154223	0.000558566	0.00920471	0.00243655	0.0036433	0.00224862	0.00417132	0.00044151	0.00476224	0.000637713	5.032e-05	0.0001906
3.6.1.69	0.0205911	0.000901629	0.0201749	0.000369913	0.017991	0.00116741	0.0215069	0.00323629	0.0242515	0.00136135	0.0313758	0.00151741	5.037e-05	0.0001906
5.1.3.31	0.0285996	0.00131488	0.0171277	0.000830943	0.0289017	0.00410921	0.0195286	0.00352063	0.0214903	0.00226571	0.020167	0.00116146	5.049e-05	0.0001906
5.1.3.30	0.0285996	0.00131488	0.0171277	0.000830943	0.0289017	0.00410921	0.0195286	0.00352063	0.0214903	0.00226571	0.020167	0.00116146	5.049e-05	0.0001906
6.3.2.45	0.0239154	0.0014531	0.0331313	0.00230897	0.0256031	0.00391947	0.0307789	0.00285789	0.0339262	0.00171788	0.0218544	0.00103737	5.051e-05	0.0001906
1.1.1.407	0.000689084	0.000130118	0.000809598	0.000337085	0.000795238	0.000137201	0.000151606	0.00012584	0.000304646	0.000114408	0.000394968	0.000125474	5.056e-05	0.0001907
1.1.5.8	0.0176086	0.00291799	0.00619535	0.000876102	0.00580216	0.00220045	0.00816553	0.00516611	0.00316148	0.000779065	0.00296878	0.00118471	5.061e-05	0.0001907
1.1.1.276	0.00153299	0.000357174	0.000788892	0.000220854	0.00146745	0.000407284	0.00229732	0.000411886	0.00393145	0.000380847	0.001076	0.000283293	5.067e-05	0.0001907
2.1.1.365	0.00748942	0.000478363	0.00548877	0.000599757	0.00721273	0.000751785	0.00836025	0.00161577	0.0130762	0.00148146	0.00980776	0.000470132	5.087e-05	0.0001912
4.2.1.177	0.00531403	0.00111854	0.00269846	0.000565817	0.00307607	0.00107937	0.00318815	0.000863532	0.01187	0.00138057	0.0040555	0.000264514	5.088e-05	0.0001912
6.4.1.3	0.150044	0.00472346	0.163198	0.00493793	0.139478	0.011543	0.155012	0.0131107	0.134122	0.00592335	0.193946	0.00470075	5.095e-05	0.0001913
1.14.13.83	0.00340809	0.000453936	0.00133416	0.000177154	0.00178206	0.000451092	0.00224821	0.000371869	0.00215343	0.000199111	0.00157732	0.000324595	5.115e-05	0.0001919
5.3.3.8	0.0257937	0.00130089	0.0303917	0.00109754	0.0274987	0.00152241	0.0297431	0.00139751	0.029396	0.0019595	0.0342672	0.00197272	5.123e-05	0.0001919
2.6.1.99	0	0	0	0	0	0	0.000547041	0.00120121	0	0	0.000102503	5.88897e-05	5.124e-05	0.0001919
1.17.99.10	0.0244505	0.00829552	0.0472296	0.00415843	0.00851303	0.00700197	0.0181039	0.00774703	0.00565148	0.00199792	0.00490444	0.00045201	5.13e-05	0.0001919
3.1.3.15	0.0483388	0.00209435	0.0675469	0.00111165	0.0624939	0.00629231	0.0627048	0.00472103	0.0701128	0.00376056	0.0603505	0.00234134	5.147e-05	0.0001919
2.3.1.82	0.0164794	0.00162212	0.0154851	0.00108533	0.0192206	0.00108581	0.0141477	0.00223155	0.0139934	0.00132736	0.0238194	0.000823206	5.147e-05	0.0001919
4.1.1.114	0.0132474	0.000959239	0.012513	0.00199283	0.0171756	0.00242173	0.01969	0.00245152	0.0210706	0.00135361	0.0210837	0.000950509	5.15e-05	0.0001919
1.1.3.8	0.00543341	0.000783106	0.00296945	0.000385048	0.00177154	0.000436958	0.0050262	0.000883541	0.00516573	0.000469299	0.00177672	0.000191351	5.15e-05	0.0001919
1.1.1.272	0.0160991	0.00074867	0.0126345	0.00161103	0.014592	0.00118071	0.0147238	0.00120957	0.0172917	0.000505456	0.0122172	0.000860801	5.153e-05	0.0001919
4.2.3.5	0.059309	0.00159568	0.0588487	0.00120547	0.0684925	0.00185177	0.062082	0.00202378	0.0612929	0.00138333	0.0678328	0.00250786	5.16e-05	0.0001919
6.1.3.1	0.0127556	0.00144113	0.0118046	0.00288266	0.0155857	0.00279227	0.0164512	0.00316002	0.0219538	0.00147711	0.0190051	0.000488913	5.161e-05	0.0001919
1.4.1.4	0.0299487	0.00176557	0.046239	0.00157634	0.0423166	0.00997478	0.0437582	0.00631168	0.047839	0.00859203	0.0340401	0.00122794	5.164e-05	0.0001919
5.1.3.23	0.00501375	0.000348748	0.00668106	0.000588601	0.0072575	0.00262886	0.00473442	0.00076393	0.00677639	0.00134162	0.0039406	0.000403572	5.171e-05	0.0001919
2.3.1.257	0.000142819	7.02402e-05	4.25833e-05	7.37565e-05	9.60045e-05	0.000107226	0.000493474	0.000233605	0.000538932	0.000183018	0.000314306	7.82872e-05	5.19e-05	0.0001921
2.1.1.114	0.00222986	0.000257525	0.00381957	0.00020342	0.00387245	0.00126107	0.00165148	0.000364134	0.00156705	0.000272708	0.00220253	0.000284557	5.196e-05	0.0001921
2.1.1.193	0.0414438	0.00209912	0.0475007	0.00248303	0.0436224	0.00360524	0.0481183	0.00548744	0.0534927	0.000519884	0.0516215	0.0025888	5.199e-05	0.0001921
2.4.1.289	0.0779222	0.00374015	0.0704312	0.00165002	0.0886816	0.00783466	0.0724633	0.0145576	0.104908	0.00819737	0.0933363	0.00355639	5.205e-05	0.0001921
2.7.1.22	0.00265302	0.000397219	0.00648773	0.00106856	0.00656127	0.00208165	0.00363161	0.000898538	0.00522865	0.000699023	0.00616077	0.000287982	5.206e-05	0.0001921
1.8.4.14	0.00607226	0.000629966	0.0178535	0.0014628	0.0136062	0.00344795	0.0101008	0.00143295	0.00998189	0.00263041	0.00934386	0.000920889	5.208e-05	0.0001921
2.1.2.14	0.00012496	7.61415e-05	0.000136534	5.55595e-05	1.18217e-05	1.86021e-05	0	0	0	0	4.88994e-05	4.91236e-05	5.208e-05	0.0001921
3.5.4.31	0.146536	0.00353884	0.133891	0.00491213	0.131688	0.00505342	0.152107	0.0145742	0.1303	0.00472817	0.0982813	0.00437089	5.217e-05	0.0001921
3.5.4.28	0.146536	0.00353884	0.133891	0.00491213	0.131688	0.00505342	0.152107	0.0145742	0.1303	0.00472817	0.0982813	0.00437089	5.217e-05	0.0001921
3.4.11.3	0.000996597	0.000143622	0.00126173	0.000174153	0.000400176	0.000176136	0.000645004	0.000242907	0.000464936	0.00019284	0.000237074	8.20922e-05	5.223e-05	0.0001922
3.1.26.5	0.0320587	0.00161961	0.0384919	0.00231625	0.0409064	0.00586654	0.0338857	0.00109539	0.0395513	0.00251591	0.0422716	0.00245807	5.231e-05	0.0001923
3.1.1.75	0.0215246	0.00197999	0.0180515	0.000988948	0.0158009	0.00121905	0.0161372	0.00238695	0.0127384	0.00131403	0.0160373	0.000866417	5.24e-05	0.0001923
2.1.1.11	0.00481008	0.000425263	0.00366432	0.000214353	0.00479175	0.000754508	0.0114915	0.00156634	0.0106389	0.000598328	0.00509383	0.000529042	5.241e-05	0.0001923
1.14.11.17	0.0396831	0.00430966	0.0190146	0.00289745	0.0193463	0.0048107	0.0264604	0.00399664	0.0199069	0.00348912	0.0224663	0.00159367	5.244e-05	0.0001923
2.7.7.38	0.025557	0.000817357	0.0301083	0.000662352	0.0271257	0.00317649	0.0269484	0.00128715	0.0311197	0.00222508	0.021334	0.00137585	5.255e-05	0.0001925
4.1.2.27	0.0244779	0.0021995	0.022122	0.00250855	0.028667	0.00320609	0.0375957	0.00993261	0.0320067	0.00304236	0.0510378	0.00153067	5.27e-05	0.0001928
2.6.1.59	0.0107845	0.000972597	0.00933775	0.000525051	0.0100873	0.000952436	0.00733578	0.00143101	0.0078139	0.000587092	0.00760429	0.000616247	5.273e-05	0.0001928
2.3.1.61	0.0801603	0.00419453	0.0876119	0.001387	0.0919226	0.00508357	0.0925645	0.00464051	0.086576	0.00563288	0.118504	0.00373363	5.287e-05	0.0001928
4.1.1.51	0.00538738	0.00102703	0.00345975	0.000794831	0.0010608	0.00058756	0.00052757	0.000347903	0.000389194	0.000121403	0.000378502	7.24994e-05	5.295e-05	0.0001928
6.2.1.62	0	0	0	0	0	0	7.81018e-05	5.45678e-05	6.46549e-06	1.58371e-05	5.78047e-05	4.15789e-05	5.302e-05	0.0001928
1.8.2.3	0.0082256	0.000927733	0.0186381	0.000780375	0.013703	0.0024381	0.0128109	0.00143382	0.0130468	0.00308151	0.0161548	0.00131056	5.305e-05	0.0001928
2.1.1.181	0.000222499	0.000109107	0.000570059	0.000384586	0.000359107	0.000241572	3.31242e-06	8.11374e-06	0	0	0.00112674	0.00127667	5.307e-05	0.0001928
2.1.1.233	1.10408e-05	9.0168e-06	0.000383727	0.000166838	1.98841e-06	4.87059e-06	4.25183e-05	2.74274e-05	0.000165274	3.39683e-05	4.91885e-06	7.63858e-06	5.307e-05	0.0001928
2.8.2.4	0.00556289	0.000703675	0.00286208	0.000496865	0.00284547	0.000604059	0.00491129	0.000651871	0.00671999	0.00104049	0.00444204	0.000851404	5.308e-05	0.0001928
3.4.22.40	0.00225516	0.000462344	0.00363188	0.00079786	0.00694459	0.00435893	0.00226671	0.00106273	0.013177	0.00767541	0.00305878	0.000453097	5.309e-05	0.0001928
2.4.2.15	0.000409276	0.000177639	0.000857069	0.000308044	0.000863578	0.00033927	0.00200258	0.00127939	0.00252979	0.000584185	0.000616043	0.000177475	5.312e-05	0.0001928
1.5.98.1	6.055e-05	6.92325e-05	0.000780255	0.000259971	0.00147902	0.000948904	7.7066e-05	8.51999e-05	5.92604e-05	6.94134e-05	0.000378058	0.000143994	5.332e-05	0.0001933
2.5.1.39	0.0311796	0.00167624	0.0368774	0.00222852	0.0302321	0.00213897	0.0313269	0.00194154	0.0264146	0.00143644	0.0263867	0.000774095	5.34e-05	0.0001933
2.8.2.35	0.00104144	0.000216374	0.00016797	0.000205944	0.00028872	0.000154415	0.000830771	0.000279591	0.00111154	0.000347698	0.000221157	0.000100601	5.341e-05	0.0001933
5.1.3.6	0.0580218	0.0018507	0.0641105	0.00205758	0.0554724	0.00180113	0.053827	0.00204527	0.0545191	0.00156621	0.0439561	0.00201758	5.345e-05	0.0001933
2.4.1.82	0.000321785	0.000155319	0.000183404	9.74387e-05	0.000737384	0.00027609	4.93903e-05	3.64573e-05	0.000215162	0.000160323	2.83593e-05	2.13737e-05	5.36e-05	0.0001935
1.1.2.3	0.0349246	0.00263363	0.0274052	0.00124832	0.0241342	0.0014589	0.0356649	0.00637717	0.0280926	0.00493953	0.0201921	0.00170205	5.369e-05	0.0001935
3.5.1.131	0.00309385	0.000540253	0.00134749	7.87371e-05	0.00135167	0.000557997	0.00132484	0.000742715	0.000486386	0.000151587	0.000822095	0.000114415	5.374e-05	0.0001935
1.20.9.1	0.00954337	0.00110769	0.00970656	0.00115603	0.0071952	0.000831094	0.009202	0.00253115	0.00413915	0.000476992	0.00633782	0.000399904	5.377e-05	0.0001935
1.20.2.1	0.00954337	0.00110769	0.00970656	0.00115603	0.0071952	0.000831094	0.009202	0.00253115	0.00413915	0.000476992	0.00633782	0.000399904	5.377e-05	0.0001935
4.2.1.147	0.00607552	0.000738483	0.00436348	0.000598077	0.00678264	0.000757118	0.00376297	0.000390618	0.00423709	0.000811124	0.00515388	0.000629211	5.377e-05	0.0001935
4.1.1.1	0.00525585	0.000929564	0.00060499	7.28346e-05	0.0018819	0.000798781	0.0018192	0.000494615	0.00130338	0.000231142	0.00197561	0.000395776	5.383e-05	0.0001935
1.14.14.9	0.0157499	0.00241922	0.00692249	0.000289264	0.00767688	0.00167976	0.00619894	0.00292618	0.00369391	0.00103642	0.0077031	0.000584622	5.387e-05	0.0001935
3.1.1.31	0.06142	0.00238561	0.0468504	0.00168353	0.0519286	0.00379079	0.0518631	0.00283369	0.0593289	0.00325174	0.05518	0.00191325	5.392e-05	0.0001935
3.2.2.8	0.00521873	0.000457624	0.00434598	4.80249e-05	0.00439865	0.000884705	0.00368441	0.000462611	0.00299938	0.000288085	0.00291046	0.00019365	5.394e-05	0.0001935
5.2.1.1	0.0178862	0.00265096	0.00968221	0.00109229	0.0114436	0.00220562	0.0148429	0.00509016	0.00830324	0.00131411	0.0108663	0.000327709	5.403e-05	0.0001936
3.2.2.3	0.0154762	0.000588357	0.0131074	0.00109072	0.0152612	0.00173658	0.0143305	0.00166567	0.0108857	0.000735938	0.00954778	0.000238382	5.417e-05	0.0001939
1.3.99.37	0.00158721	0.00053418	0.00075641	0.00024928	0.00144312	0.000537179	0.000290008	0.000232196	0.000669299	0.000202454	0.000717501	0.000253441	5.42e-05	0.0001939
7.3.2.7	0.03914	0.00133525	0.0346491	0.00138063	0.0420532	0.00268668	0.0427681	0.00714031	0.0491514	0.00103145	0.0561723	0.00220333	5.427e-05	0.0001939
1.14.18.6	0.002986	0.000509721	0.00419008	0.000806718	0.00494694	0.00032629	0.00330474	0.000579595	0.00383282	0.00045649	0.00529752	0.00036725	5.432e-05	0.0001939
3.2.1.113	0.00455907	0.000618655	0.00388537	0.000694154	0.00672664	0.00112701	0.00493732	0.000422308	0.00535769	0.000537931	0.00270874	0.000394397	5.434e-05	0.0001939
2.7.1.156	0.0117226	0.000626048	0.00726452	0.00102174	0.0101627	0.00138019	0.0123093	0.00156743	0.00993031	0.000628394	0.019321	0.00167284	5.45e-05	0.0001943
1.3.8.7	0.398991	0.0201322	0.296656	0.00976546	0.300589	0.0354441	0.337694	0.0152863	0.321313	0.0331672	0.345813	0.00849981	5.456e-05	0.0001943
6.1.1.12	0.0899462	0.00234321	0.110344	0.00253462	0.102828	0.00370287	0.100506	0.00563857	0.0989193	0.00332401	0.1055	0.00171529	5.475e-05	0.0001943
2.1.1.309	0.000290656	0.000121032	0	0	9.95049e-05	0.00011877	0.000723787	0.000245617	0.00028705	0.000107889	5.72747e-05	4.88028e-05	5.485e-05	0.0001943
7.2.2.8	0.173117	0.00507873	0.177039	0.00568991	0.192351	0.0226595	0.143474	0.00169197	0.137868	0.00239655	0.17138	0.00486197	5.487e-05	0.0001943
2.6.1.82	0.0125171	0.00114424	0.0198472	0.00137064	0.0148631	0.00141981	0.0125954	0.00303433	0.0162732	0.0019073	0.0218695	0.000700275	5.493e-05	0.0001943
6.5.1.2	0.0950402	0.00261755	0.103122	0.00173935	0.0934501	0.0030369	0.100485	0.00361904	0.0995689	0.00357433	0.10943	0.00213608	5.505e-05	0.0001943
3.1.1.14	0.000564643	0.000284652	0.000710812	0.000218201	0.000853391	0.000187041	0.000961048	0.000226355	0.00141118	0.000203229	0.00282797	0.000201894	5.505e-05	0.0001943
2.4.1.376	0.000541724	0.000123786	5.05377e-05	3.3032e-05	0.000235692	0.000135066	1.86087e-05	2.88669e-05	0.000173847	0.000270912	5.53832e-06	1.35661e-05	5.511e-05	0.0001943
2.4.2.63	0.000541724	0.000123786	5.05377e-05	3.3032e-05	0.000235692	0.000135066	1.86087e-05	2.88669e-05	0.000173847	0.000270912	5.53832e-06	1.35661e-05	5.511e-05	0.0001943
4.3.1.17	0.0164803	0.00170165	0.0378809	0.00150957	0.0360584	0.0065877	0.0306757	0.00139871	0.0301609	0.00128045	0.0294298	0.00186367	5.515e-05	0.0001943
6.3.2.52	0.000950235	0.000220198	0.00175749	0.000181557	0.00268779	0.000785356	0.00181284	0.000581341	0.00170025	0.00019254	0.00115102	0.000241815	5.517e-05	0.0001943
1.3.98.5	0.013358	0.0012401	0.00650327	0.00234382	0.00989002	0.00186098	0.0120132	0.00162051	0.0111545	0.00193488	0.0203591	0.0012504	5.52e-05	0.0001943
2.4.2.54	0.00558383	0.000778088	0.004037	0.000812155	0.00870597	0.00178522	0.00392314	0.000440266	0.00471441	0.000365487	0.00404029	0.000550827	5.52e-05	0.0001943
1.1.1.18	0.153811	0.00686531	0.148074	0.0129786	0.170721	0.011761	0.123198	0.0166403	0.134776	0.0068821	0.126535	0.0068454	5.524e-05	0.0001943
1.1.1.369	0.153811	0.00686531	0.148074	0.0129786	0.170721	0.011761	0.123198	0.0166403	0.134776	0.0068821	0.126535	0.0068454	5.524e-05	0.0001943
3.4.21.26	0.0708626	0.0025262	0.114216	0.00794367	0.0976092	0.00789736	0.0843665	0.0107977	0.0705079	0.0090664	0.0653392	0.00382883	5.524e-05	0.0001943
4.1.1.33	0.00855896	0.00141426	0.0160131	0.000608497	0.0147538	0.00382699	0.0146334	0.00207225	0.0125269	0.00144027	0.00835874	0.000585433	5.532e-05	0.0001943
4.7.1.1	0.00336402	0.000724756	0.000981293	0.000400634	0.00250071	0.000438004	0.00296934	0.000808478	0.00156598	0.000358683	0.00154997	0.000166351	5.532e-05	0.0001943
2.7.7.64	0.000363056	0.000168872	0.000603074	0.000350182	0.00181697	0.00136171	0.00730528	0.00913198	0.000164443	0.000139077	0.0014121	0.000369914	5.539e-05	0.0001943
4.3.1.29	0.00647823	0.000487753	0.00659273	0.00143394	0.00614219	0.00111066	0.00364144	0.000993324	0.00336296	0.000311678	0.00398146	0.000395078	5.543e-05	0.0001943
1.14.11.55	0.00529323	0.000911709	0.00185577	0.00026787	0.00502326	0.00115184	0.00246744	0.00109369	0.00287977	0.000264531	0.0025861	0.000311115	5.545e-05	0.0001943
1.1.1.261	0.00697017	0.00102188	0.00828422	0.00126893	0.0162884	0.00132541	0.00913067	0.00236839	0.00847051	0.000964613	0.0164077	0.000659127	5.575e-05	0.0001947
1.1.1.398	0.00352605	0.000381733	0.00868718	0.000704115	0.00664983	0.00152071	0.00932059	0.00162885	0.00764374	0.00124002	0.00623368	0.000842	5.575e-05	0.0001947
2.1.3.7	0.000395775	0.000116414	0.000339867	8.92684e-05	0.000221123	0.000172937	7.48691e-05	5.99255e-05	0.000166519	7.32141e-05	7.77277e-06	1.23685e-05	5.579e-05	0.0001947
3.1.3.68	0.0101683	0.000795478	0.00867777	0.00135509	0.00829022	0.000720034	0.0083978	0.000771791	0.0109255	0.00115259	0.00653347	0.000554708	5.58e-05	0.0001947
1.13.11.50	4.23683e-05	4.16451e-05	1.08964e-05	1.88731e-05	1.00949e-05	1.56397e-05	0.000432968	0.000255997	0.000345015	9.68566e-05	8.10396e-05	5.21942e-05	5.58e-05	0.0001947
2.8.1.8	0.0528735	0.00183281	0.0574563	0.00200062	0.0565395	0.00232653	0.0593407	0.00343796	0.0593034	0.00100978	0.0637843	0.00276491	5.59e-05	0.0001949
4.4.1.5	0.0994813	0.00513364	0.0821151	0.00240547	0.0834759	0.0041147	0.0767892	0.0074786	0.0717624	0.00483451	0.075522	0.00109614	5.599e-05	0.000195
3.4.14.4	0.0079326	0.000806989	0.0179935	0.0011093	0.0105514	0.00245457	0.0108063	0.00263622	0.0109624	0.00265182	0.00523091	0.000780205	5.607e-05	0.000195
2.5.1.32	0.0410568	0.00187827	0.0395824	0.000614434	0.0469842	0.00270384	0.0469701	0.00651524	0.052287	0.00289108	0.0564363	0.00136183	5.625e-05	0.000195
1.13.11.11	0.0108538	0.000855626	0.0168549	0.00161029	0.0157729	0.00273377	0.0151257	0.00545073	0.00781038	0.00136639	0.00787973	0.000632208	5.625e-05	0.000195
7.2.4.2	0.00951072	0.000805693	0.0087818	0.000687944	0.00819555	0.00173956	0.010214	0.00103707	0.0138521	0.00221639	0.00638026	0.000491005	5.637e-05	0.000195
2.5.1.145	0.0776263	0.00248746	0.0892245	0.003487	0.0844585	0.0026024	0.0749023	0.00596317	0.0862557	0.00256446	0.0745583	0.0017466	5.641e-05	0.000195
1.8.5.3	0.0310004	0.00219118	0.018062	0.00175994	0.0253208	0.00278725	0.0197315	0.00315356	0.0227288	0.00195757	0.0215224	0.000690106	5.643e-05	0.000195
3.5.1.96	0.00413271	0.000521952	0.00997569	0.00186272	0.00661985	0.0015124	0.0081265	0.00148561	0.0104623	0.00261077	0.0072292	0.000470866	5.643e-05	0.000195
5.4.99.21	0.00230325	0.000564753	0.00876557	0.000187775	0.00851124	0.00214509	0.00240376	0.000354694	0.00224037	0.00034831	0.0039472	0.00082376	5.644e-05	0.000195
3.1.1.23	0.0221072	0.00208193	0.0240894	0.00146798	0.0279547	0.00106804	0.0277622	0.00433393	0.0317029	0.00157569	0.0320341	0.00115853	5.651e-05	0.000195
5.1.1.18	0.000992085	0.000295432	0.000539603	0.000144397	0.000904518	0.000255573	0.000281649	4.99419e-05	0.000342352	0.000134861	0.000466795	0.000155064	5.655e-05	0.000195
7.2.2.13	0.0123012	0.00131645	0.0105757	0.00362934	0.0125533	0.00255178	0.00959365	0.000690084	0.00744016	0.00114974	0.0163892	0.000787761	5.656e-05	0.000195
2.4.2.45	0.0250638	0.00146807	0.0204432	0.00168738	0.0223051	0.000770395	0.0198461	0.0013648	0.0227232	0.00276455	0.0178863	0.0016239	5.675e-05	0.000195
2.3.2.2	0.175916	0.00936618	0.178917	0.00685647	0.166856	0.00445793	0.206447	0.0187529	0.167822	0.0084351	0.150054	0.00806776	5.681e-05	0.000195
3.4.19.13	0.175916	0.00936618	0.178917	0.00685647	0.166856	0.00445793	0.206447	0.0187529	0.167822	0.0084351	0.150054	0.00806776	5.681e-05	0.000195
2.4.1.4	0.0260143	0.00322311	0.0204064	0.00114332	0.0309386	0.00170652	0.0336598	0.00403608	0.0418551	0.00651671	0.0343629	0.00165406	5.681e-05	0.000195
1.3.1.1	0.0177635	0.00141933	0.033034	0.00131716	0.0208864	0.000826156	0.0224606	0.0057024	0.0139659	0.0040426	0.0103459	0.000766576	5.681e-05	0.000195
1.3.1.87	0.000454688	0.000187974	0	0	0.000184835	0.00016984	6.9539e-05	7.78284e-05	1.59292e-05	2.6565e-05	0.00170326	0.00181787	5.682e-05	0.000195
2.7.1.113	0.01232	0.00128376	0.0239425	0.00172414	0.0180476	0.00349492	0.0128961	0.000854386	0.0171899	0.00289432	0.0135492	0.00118561	5.685e-05	0.000195
3.1.13.5	0.0530864	0.00157198	0.0499539	0.00240771	0.053535	0.00326604	0.0588617	0.00205247	0.0557298	0.000784573	0.0617502	0.00422969	5.69e-05	0.000195
1.13.11.19	0.00020513	8.54542e-05	0.000188121	4.56163e-05	7.91082e-05	6.58858e-05	2.44692e-05	5.99371e-05	2.87046e-06	7.03116e-06	8.93087e-06	2.18761e-05	5.697e-05	0.000195
5.4.99.15	0.0540273	0.00310225	0.028375	0.00140097	0.0392618	0.00653298	0.0366968	0.00375348	0.0430002	0.0030851	0.0381911	0.000775008	5.704e-05	0.000195
4.2.1.106	0.000437845	0.00012037	0.0005328	0.000258757	6.34955e-05	4.75647e-05	8.32835e-05	0.000116393	7.58605e-06	1.21392e-05	0.000109678	3.72208e-05	5.706e-05	0.000195
2.4.1.10	0.000592151	0.000164371	3.91272e-05	4.54926e-05	0.00108466	0.000526784	0.000202383	0.000177605	0.000366015	0.000142729	0.000136962	0.000117693	5.731e-05	0.000195
1.2.4.1	0.192181	0.00548161	0.200066	0.00506961	0.211691	0.00850834	0.20344	0.0201368	0.172872	0.0101912	0.227991	0.00483501	5.732e-05	0.000195
2.5.1.96	0.00146342	0.000297134	0.000904844	0.000343425	0.00138555	0.00061848	0.00389005	0.000842554	0.00273946	0.00015059	0.00151796	0.000159673	5.736e-05	0.000195
4.2.1.24	0.0475552	0.00201341	0.0502705	0.00147231	0.0525818	0.00257562	0.0541538	0.00173611	0.0488511	0.00189034	0.0564216	0.0019458	5.748e-05	0.000195
1.1.1.302	0.00669847	0.000474465	0.00384774	0.000243521	0.0101315	0.00183315	0.00904112	0.00179511	0.0078569	0.000793104	0.010782	0.000462525	5.748e-05	0.000195
1.14.19.28	0.00319572	0.000485952	0.00211177	0.000176374	0.00280359	0.000637517	0.00545999	0.00128976	0.00177682	0.000843591	0.00174028	0.000313954	5.748e-05	0.000195
1.3.1.114	0.00174025	0.000317554	0.00500816	0.00100432	0.00398799	0.00134178	0.00340963	0.000844413	0.00260061	0.000458283	0.00282388	0.00040005	5.752e-05	0.000195
4.1.2.25	0.0207854	0.0011791	0.0331467	0.00164063	0.0283892	0.00429939	0.0261368	0.00330526	0.0304444	0.00118689	0.0332685	0.00205177	5.754e-05	0.000195
3.8.1.3	0.0242002	0.00206012	0.0153135	0.000735855	0.0177645	0.00294984	0.021136	0.00139023	0.0164878	0.000948634	0.0151203	0.00124577	5.76e-05	0.000195
1.14.14.155	0.00117893	0.000277136	0.00117396	0.000266527	0.000325418	0.000232233	0.00237709	0.00029313	0.00168067	0.000346163	0.00124306	0.000194416	5.763e-05	0.000195
1.8.4.2	0.000205253	0.000127575	0.000587178	0.000191223	0.000403806	0.000318945	0	0	2.43669e-05	3.70751e-05	0.000318328	0.000186101	5.764e-05	0.000195
2.7.2.8	0.0428399	0.000694003	0.0477748	0.00135317	0.047549	0.00183611	0.0492122	0.0024232	0.0452559	0.00203063	0.0510311	0.00121286	5.766e-05	0.000195
1.3.3.11	0.0105729	0.00150293	0.00458596	0.000246661	0.0063305	0.000654727	0.00682964	0.00424774	0.00310473	0.000554002	0.00404184	0.000601302	5.766e-05	0.000195
5.4.2.2	0.0795839	0.0032572	0.0727711	0.00147042	0.0838253	0.007326	0.0856947	0.00294134	0.096944	0.00332815	0.0920286	0.00156834	5.775e-05	0.000195
6.1.1.15	0.0932679	0.00198338	0.101617	0.00309232	0.103289	0.00537754	0.101874	0.00556671	0.0900328	0.00148557	0.102825	0.00153573	5.778e-05	0.000195
1.5.1.8	0.000978791	0.000279278	0.00315751	0.000503361	0.00296763	0.00133609	0.00321243	0.000582498	0.00484923	0.000878675	0.00291128	0.000408983	5.778e-05	0.000195
1.5.1.9	0.000978791	0.000279278	0.00315751	0.000503361	0.00296763	0.00133609	0.00321243	0.000582498	0.00484923	0.000878675	0.00291128	0.000408983	5.778e-05	0.000195
1.17.9.1	0.00445015	0.000523872	0.00207597	0.00077238	0.00146702	0.000608561	0.00190181	0.000361526	0.00280113	0.000815361	0.00257549	0.000324327	5.785e-05	0.0001951
3.1.21.10	0.0335637	0.00108032	0.0408773	0.00187571	0.0387006	0.00306487	0.0369626	0.0028081	0.0428004	0.00167858	0.0399793	0.00100382	5.791e-05	0.0001951
1.3.5.1	0.203317	0.00576148	0.241595	0.00592977	0.21707	0.00989007	0.226597	0.0201907	0.197779	0.00729597	0.236017	0.00470738	5.798e-05	0.0001952
1.17.4.2	0.00360024	0.000729297	0.00966908	0.00122549	0.00904498	0.00563256	0.00830627	0.00144769	0.00676389	0.00114453	0.00561503	0.000780233	5.809e-05	0.0001952
2.3.1.16	0.0852421	0.00300667	0.0826223	0.000407655	0.0725542	0.00803087	0.0733266	0.00282203	0.0673075	0.00235315	0.0724	0.00182311	5.81e-05	0.0001952
2.1.3.11	0.000722426	0.000393398	0.00463803	0.000253808	0.00319128	0.00131014	0.00226253	0.00118965	0.00198402	0.000501274	0.00166526	0.000194306	5.81e-05	0.0001952
3.6.1.9	0.0257641	0.00159703	0.0274646	0.00163406	0.022456	0.0013993	0.0291302	0.00238084	0.0257192	0.00176793	0.0337958	0.00159566	5.836e-05	0.0001959
4.4.1.14	0.000538012	0.000154292	0.00167799	0.000676881	0.00250513	0.000481073	0.00128863	0.000446541	0.00151278	0.00025864	0.00181015	0.000158885	5.84e-05	0.0001959
2.1.1.171	0.0330491	0.00112105	0.0401213	0.0030445	0.0367543	0.00320463	0.0359088	0.00284261	0.043673	0.00229337	0.0433906	0.00141209	5.877e-05	0.0001969
1.8.98.3	0.000118296	7.88234e-05	8.08818e-05	5.34095e-05	0.000450641	0.000189446	0.000387845	0.000205154	0.000789757	0.000216434	0.00050532	0.000100835	5.88e-05	0.0001969
3.5.4.40	0.0148707	0.00130289	0.0126163	0.00204897	0.0153307	0.00127211	0.0106028	0.00141923	0.0130793	0.000706089	0.0102792	0.000992087	5.909e-05	0.0001976
1.7.1.16	0.00181216	0.000441078	0.00160981	0.000560916	0.0023495	0.000525073	0.00347095	0.00101539	0.00389026	0.000473	0.00256289	0.000338349	5.911e-05	0.0001976
2.4.1.32	0.0158719	0.00102632	0.0124478	0.000935688	0.0119109	0.00129869	0.0120075	0.00124195	0.0107349	0.00042709	0.0102409	0.00113094	5.917e-05	0.0001976
1.14.18.1	0.0073864	0.000544281	0.00167128	0.000188108	0.00410376	0.0010786	0.00257442	0.000828007	0.00244959	0.000376866	0.0024967	0.0003139	5.931e-05	0.000198
2.6.1.42	0.1092	0.00218494	0.122393	0.0068866	0.115005	0.00316416	0.11782	0.00533492	0.101555	0.00279112	0.114981	0.00209302	5.957e-05	0.0001987
4.1.1.75	0.00114514	0.000202642	0.00250242	0.000297037	0.00272463	0.000996111	0.00242392	0.00118115	0.00121561	0.000182817	0.00305738	0.000458116	5.988e-05	0.0001995
2.4.1.339	0.0153659	0.00130677	0.0159377	0.00246446	0.0135148	0.000809684	0.0110046	0.00329926	0.0179778	0.00158374	0.00926541	0.000817571	6.001e-05	0.0001995
2.4.1.340	0.0153659	0.00130677	0.0159377	0.00246446	0.0135148	0.000809684	0.0110046	0.00329926	0.0179778	0.00158374	0.00926541	0.000817571	6.001e-05	0.0001995
3.1.4.1	0.00439807	0.000394236	0.0030489	0.00029756	0.00261701	0.000476981	0.00437012	0.000763351	0.00390314	0.000394792	0.00268795	0.000248541	6.001e-05	0.0001995
3.1.2.2	0.062301	0.00259544	0.0659695	0.00178178	0.053033	0.00342749	0.0541827	0.00290906	0.0621179	0.00100512	0.058441	0.00134319	6.012e-05	0.0001997
5.6.1.7	0.202481	0.00730024	0.232639	0.0109984	0.203934	0.0117507	0.22746	0.024452	0.160693	0.00866892	0.216223	0.00441221	6.016e-05	0.0001997
6.2.1.19	0.000143074	9.91552e-05	0.000437449	8.60729e-05	0.000946206	0.000324321	0.000230939	0.000113906	0.000462328	0.000122481	0.000163182	6.69648e-05	6.028e-05	0.0001999
3.1.3.45	0.0148444	0.00150274	0.0232629	0.00199417	0.0199512	0.0034605	0.0166006	0.00143393	0.0233472	0.00292144	0.0160869	0.000876113	6.033e-05	0.0002
2.6.1.19	0.0636797	0.00321231	0.0815091	0.000420959	0.07189	0.0058369	0.0604044	0.00309937	0.0575613	0.000879943	0.0662392	0.000811358	6.04e-05	0.0002
1.2.4.2	0.119025	0.00612791	0.125873	0.00318556	0.134452	0.00507234	0.133224	0.0124182	0.110676	0.00793508	0.149963	0.0030839	6.044e-05	0.0002
3.4.11.9	0.103994	0.00500436	0.110393	0.00179186	0.0987616	0.00431374	0.0931836	0.00259458	0.0982905	0.00328202	0.0906576	0.00223275	6.062e-05	0.0002003
2.4.1.347	0.039965	0.00169564	0.0322652	0.00113679	0.0373297	0.00426795	0.0370811	0.00311194	0.0303576	0.00325272	0.0444505	0.00141833	6.062e-05	0.0002003
2.8.2.23	0.00643458	0.000382829	0.00336808	0.000372178	0.00431882	0.000845912	0.00528039	0.00144305	0.00787178	0.000643975	0.00417379	0.000353661	6.082e-05	0.0002006
1.5.1.28	0.00728627	0.00104323	0.0153098	0.001162	0.00945056	0.00196179	0.0160094	0.00480409	0.0157691	0.00158807	0.013695	0.00103291	6.103e-05	0.0002006
5.1.1.8	0.00611102	0.000645218	0.00967071	0.000803978	0.0063299	0.0012193	0.00680709	0.00125138	0.00463833	0.000740901	0.00340933	0.000472097	6.103e-05	0.0002006
1.17.99.8	0.00429353	0.000569329	0.00380233	0.000355506	0.00132792	0.000671149	0.00202354	0.00101282	0.00153916	0.000346361	0.000892293	0.000135891	6.103e-05	0.0002006
5.1.1.22	0.00123455	0.000279046	0.000392801	8.59152e-05	0.000255208	0.000197175	0.000474418	0.000479615	0.000477271	9.56341e-05	1.91998e-05	2.33941e-05	6.109e-05	0.0002006
2.5.1.49	0.0552353	0.00240887	0.063879	0.0023329	0.0639235	0.00373528	0.0642585	0.00577984	0.0558132	0.00556044	0.0749328	0.00168002	6.111e-05	0.0002006
2.4.1.241	0	0	0	0	3.34089e-05	5.29367e-05	0.000187192	0.000101522	5.46838e-05	3.13024e-05	3.57679e-06	8.76131e-06	6.111e-05	0.0002006
2.7.1.74	0.0127564	0.00170031	0.0228597	0.000994757	0.0231608	0.00535284	0.0131609	0.00299879	0.0171368	0.00159792	0.0138022	0.000949636	6.114e-05	0.0002006
2.7.1.76	0.0127564	0.00170031	0.0228597	0.000994757	0.0231608	0.00535284	0.0131609	0.00299879	0.0171368	0.00159792	0.0138022	0.000949636	6.114e-05	0.0002006
6.3.5.3	0.1672	0.00372426	0.179204	0.0021699	0.178464	0.00578987	0.17668	0.00752491	0.166906	0.00339735	0.199578	0.00315404	6.126e-05	0.0002008
3.6.1.70	7.18302e-05	3.4985e-05	0	0	6.62755e-05	4.14618e-05	7.25887e-06	1.77805e-05	0	0	0	0	6.148e-05	0.0002011
3.6.1.72	7.18302e-05	3.4985e-05	0	0	6.62755e-05	4.14618e-05	7.25887e-06	1.77805e-05	0	0	0	0	6.148e-05	0.0002011
3.6.1.71	7.18302e-05	3.4985e-05	0	0	6.62755e-05	4.14618e-05	7.25887e-06	1.77805e-05	0	0	0	0	6.148e-05	0.0002011
2.8.2.11	0.000347912	0.000143438	0.00013084	8.49092e-05	0.000736272	0.000247606	0.000866161	0.000203619	0.00067088	0.000195501	0.00102228	4.81837e-05	6.176e-05	0.0002018
2.7.2.18	0.0285376	0.00220539	0.0395988	0.00154218	0.0404002	0.00438566	0.0343372	0.00458755	0.0397043	0.000867226	0.0423392	0.00121642	6.206e-05	0.0002027
3.5.4.12	0.00962685	0.00112494	0.0149781	0.00072567	0.0165484	0.0059833	0.0110306	0.00113175	0.0173939	0.0051655	0.0135299	0.00053221	6.215e-05	0.0002028
3.6.1.61	0.000133958	8.95438e-05	0.00220136	0.000579037	0.000759607	0.000186958	0.000719816	0.000203463	0.00054795	0.000112493	0.000647238	0.000116514	6.226e-05	0.000203
2.7.4.3	0.0476171	0.000816465	0.0583396	0.00134628	0.0554704	0.00358668	0.0528729	0.0040731	0.0584192	0.000775899	0.0523628	0.00174126	6.236e-05	0.0002031
2.5.1.42	0.00755938	0.000481913	0.00947225	0.00207892	0.013851	0.0051634	0.00521531	0.0018315	0.00900671	0.00133344	0.00581299	0.000647761	6.238e-05	0.0002031
6.2.1.7	0.0110666	0.00113774	0.00267666	0.000687326	0.00485678	0.00132793	0.00263434	0.000904799	0.00428461	0.00108949	0.00353119	0.000401472	6.264e-05	0.0002035
3.5.1.111	0.000389039	0.000127167	0.000760726	0.000680895	0.000740397	0.000203909	0.000461983	0.000320363	0.00157183	0.000354024	0.00510784	0.000489157	6.265e-05	0.0002035
3.4.22.70	0.0291194	0.00163745	0.0304492	0.000719798	0.0307817	0.00285192	0.0364444	0.00549605	0.0408775	0.00380922	0.0497542	0.00324831	6.269e-05	0.0002035
3.2.1.6	0.00340241	0.000556228	0.0139427	0.00205628	0.00745108	0.00188555	0.00537151	0.00144113	0.00385723	0.0008927	0.00704581	0.00105096	6.269e-05	0.0002035
4.4.1.2	0.00159837	0.000337734	0.0020421	0.000258055	0.0014457	0.000514358	0.00371397	0.000665718	0.00377446	0.000240117	0.00191281	0.000251605	6.273e-05	0.0002035
2.6.1.14	5.74674e-05	3.96948e-05	3.53451e-05	2.63962e-05	0.000267917	0.000130754	9.90701e-06	1.56494e-05	0.000114913	5.96109e-05	0.000183053	5.43356e-05	6.278e-05	0.0002035
3.5.1.68	0.0160497	0.0011653	0.0201591	0.00315303	0.0151152	0.00063278	0.0168858	0.0032764	0.0106857	0.00132041	0.010152	0.000782144	6.299e-05	0.0002037
4.2.1.167	0.000665727	0.000193065	0.00199976	0.000567232	0.00109035	0.000483337	0.000748944	0.000265009	0.00140263	0.000278373	0.00200698	0.00029877	6.299e-05	0.0002037
2.3.1.39	0.0679666	0.00176887	0.0675097	0.00554206	0.0694059	0.00336437	0.0756704	0.00502884	0.0800045	0.00190939	0.0827222	0.00165055	6.303e-05	0.0002037
3.4.21.89	0.0780004	0.00243519	0.0870545	0.00526374	0.0848684	0.00555822	0.0829353	0.00400722	0.0918261	0.00510763	0.0975971	0.00233611	6.306e-05	0.0002037
2.3.1.183	0.00542859	0.000518125	0.00290703	0.000376054	0.00384969	0.000555366	0.00567486	0.000894231	0.00450432	0.000614689	0.00329704	0.000484166	6.312e-05	0.0002038
5.2.1.8	0.359215	0.00462721	0.447371	0.0148206	0.393323	0.0357714	0.35985	0.00900385	0.408335	0.00636539	0.352957	0.00611072	6.337e-05	0.0002044
2.1.1.229	0.0104922	0.000914252	0.00911353	0.000296785	0.0119862	0.000676489	0.00718035	0.0017052	0.0102985	0.000878724	0.00926786	0.000783621	6.341e-05	0.0002044
2.7.8.17	0.00058471	0.000148649	0.000794216	0.000138566	0.0016441	0.00118401	0.000303727	0.0001886	0.00190472	0.000508227	0.000976417	0.000298285	6.35e-05	0.0002045
1.6.3.4	0.0154685	0.00119827	0.00760945	0.00160716	0.0104417	0.000691452	0.0124608	0.00223939	0.0127293	0.00121348	0.00834256	0.00244071	6.354e-05	0.0002045
2.1.1.191	0.04153	0.00264774	0.0448075	0.00494433	0.0577595	0.00621529	0.0308033	0.00386119	0.0433663	0.00216501	0.0409067	0.00176191	6.376e-05	0.0002049
2.7.1.213	0.00909802	0.00080695	0.0102027	0.000433984	0.0103627	0.00240975	0.00596696	0.00118355	0.00602541	0.000644009	0.00598203	0.000320092	6.378e-05	0.0002049
2.4.1.371	0.00278528	0.000306371	0.00199229	0.000353194	0.00322717	0.000976087	0.0021122	0.000416525	0.00432449	0.000801954	0.00492507	0.000588026	6.38e-05	0.0002049
1.3.5.2	0.0246741	0.0015338	0.0250631	0.00122208	0.0276366	0.00215596	0.0211072	0.00224806	0.0201307	0.00136221	0.0193249	0.00155541	6.396e-05	0.0002052
1.5.1.42	0.000206944	8.95949e-05	4.3961e-05	4.00981e-05	6.26314e-05	6.9329e-05	6.06888e-05	3.74151e-05	9.61556e-06	1.60944e-05	0.000299298	8.32171e-05	6.4e-05	0.0002052
5.4.99.67	0.00037264	0.000135871	0	0	5.97599e-05	4.85576e-05	8.93435e-06	2.18846e-05	5.80336e-06	1.42153e-05	1.77225e-05	2.79725e-05	6.419e-05	0.0002057
1.1.99.1	0.0826363	0.00574846	0.0656439	0.00573466	0.0608036	0.00461859	0.0650444	0.0108514	0.0456881	0.00561478	0.0628782	0.00226071	6.44e-05	0.0002061
5.3.1.16	0.0459084	0.00149564	0.0539902	0.00122073	0.0505217	0.00171866	0.0505548	0.00203116	0.0512257	0.00182441	0.0542282	0.00133447	6.449e-05	0.0002061
2.1.1.303	0.0051336	0.000721539	0.00177811	0.000669602	0.00158763	0.000771272	0.00204326	0.000490413	0.00225839	0.000316045	0.000829292	0.000250169	6.452e-05	0.0002061
2.5.1.120	0.0164473	0.00162077	0.0133044	0.00121847	0.0132689	0.0013235	0.0124459	0.00339685	0.0107575	0.00144673	0.00819789	0.000845542	6.453e-05	0.0002061
1.2.1.81	0.0135748	0.000497373	0.00796345	0.000594214	0.00735273	0.000479496	0.00732455	0.00316425	0.00614805	0.000611283	0.00552343	0.000532248	6.46e-05	0.0002062
5.5.1.2	0.0201855	0.000977805	0.00682953	0.000484975	0.00870569	0.00200189	0.00833764	0.00214672	0.005251	0.0008924	0.00754609	0.00143237	6.469e-05	0.0002063
1.13.11.71	0.00156315	0.000277893	0.000806852	0.000473663	0.00357222	0.000678404	0.0030425	0.00143804	0.00216583	0.000353764	0.00596815	0.000498055	6.487e-05	0.0002066
1.14.13.149	0.0224586	0.00112679	0.0358268	0.00211797	0.0302864	0.00190572	0.0259273	0.00620469	0.0168555	0.00244499	0.0207888	0.00123316	6.488e-05	0.0002066
2.3.1.30	0.0497334	0.00219559	0.0552021	0.00269786	0.0545469	0.00449474	0.0442224	0.00367094	0.0471802	0.00130001	0.0559483	0.00164497	6.491e-05	0.0002066
3.2.1.35	0.022352	0.00258336	0.00959522	0.00289023	0.0102741	0.00257149	0.0114267	0.00464791	0.00774174	0.00117894	0.0140077	0.000576471	6.5e-05	0.0002067
2.7.4.33	0.0582816	0.00209977	0.0648707	0.00183338	0.0548224	0.00137534	0.0625531	0.00281945	0.0646667	0.00596631	0.0794291	0.00147439	6.53e-05	0.0002074
2.5.1.140	0.00154549	0.000323362	0.00166714	0.000678235	0.000242374	0.000176641	0.00208671	0.00110934	0.00103561	0.000235932	0.000636472	0.000306758	6.53e-05	0.0002074
1.1.3.50	0.00257133	0.000334461	0.000167575	1.82033e-05	0.00046377	0.000340982	0.000244945	0.000146463	0.000463155	3.61415e-05	0.0001151	3.89837e-05	6.539e-05	0.0002075
6.3.4.18	0.0302184	0.00176008	0.0385783	0.000831821	0.0375281	0.00437146	0.0439301	0.00616044	0.0380429	0.00430332	0.0479587	0.0024125	6.549e-05	0.0002076
1.3.1.32	0.00995694	0.00116365	0.00340377	0.00107417	0.00618113	0.00101734	0.00699887	0.000744567	0.00731233	0.00182536	0.00500841	0.000426515	6.552e-05	0.0002076
4.2.1.92	1.66398e-05	3.73064e-05	0	0	0	0	0.000523732	0.0007503	0	0	0	0	6.567e-05	0.0002078
2.4.1.338	0.000669302	0.000258639	0.000430418	0.000167035	0.00094744	0.000272873	0.000255136	0.000125502	0.000274518	6.25827e-05	0.000248134	8.90815e-05	6.57e-05	0.0002078
2.8.2.39	0.0015915	0.000349416	0.000248844	0.000111487	0.000505636	0.000312477	0.00124441	0.000266269	0.00152916	0.000363384	0.000877862	0.000186296	6.576e-05	0.0002079
2.3.1.89	0.00151495	0.000373255	0.000452644	0.000278751	0.000847137	0.000216105	0.000259096	0.000218756	0.000439761	0.000246821	0.000675195	0.000302433	6.589e-05	0.0002081
1.3.1.22	0.00236169	0.000434539	0.00537198	0.000520569	0.00461338	0.00166982	0.00447238	0.000687133	0.00719983	0.00141687	0.00460832	0.000868708	6.594e-05	0.0002081
1.1.1.107	0.00247887	0.000701581	0.000731992	0.000545198	0.00150915	0.000521717	0.000807036	0.000224952	0.000824234	0.000130867	0.0011728	0.000182396	6.597e-05	0.0002081
2.3.1.235	0.000850539	0.000291795	0.000160041	0.000103769	0.000290681	0.000186495	2.82301e-05	3.47381e-05	0.000274941	0.000133617	7.9594e-05	8.57432e-05	6.604e-05	0.0002081
1.14.13.248	0.000966806	0.000260099	6.69838e-05	3.26684e-05	0.00102731	0.000439693	0.000180224	0.000145815	0.00100487	0.000263385	0.00029055	0.000125197	6.619e-05	0.0002084
1.1.1.169	0.0916351	0.00298995	0.0701845	0.000877728	0.0661429	0.00564679	0.0679814	0.00482903	0.0718143	0.00359055	0.0635581	0.00109605	6.623e-05	0.0002084
1.14.99.60	0.00956571	0.000806387	0.0158551	0.000644395	0.0128608	0.00173024	0.0167497	0.00313491	0.0182305	0.00292987	0.0176851	0.00093443	6.647e-05	0.000209
2.1.1.145	0.0124704	0.000586179	0.0106861	0.000692353	0.0115675	0.00123635	0.00771923	0.00095048	0.00694683	0.00121848	0.0127122	0.00177323	6.656e-05	0.0002092
1.3.8.2	0.000677287	0.000157566	0.00175979	0.000366504	0.000514786	0.000129017	0.00104933	0.00028981	0.00183733	0.000645609	0.000666811	0.00022262	6.669e-05	0.0002094
4.2.3.152	0.000120643	6.30693e-05	0.000164489	0.00019045	0.000492722	0.000125465	0.000298408	0.000337294	2.75747e-05	4.64784e-05	0	0	6.683e-05	0.0002097
1.1.1.252	6.32254e-05	2.70572e-05	0	0	1.5481e-05	2.43502e-05	0	0	4.76007e-06	1.16597e-05	0	0	6.702e-05	0.0002098
1.3.99.28	0.0450552	0.00289137	0.0534811	0.00184424	0.0613656	0.00401912	0.0610568	0.00773176	0.0613567	0.00425292	0.0690142	0.00221807	6.719e-05	0.0002098
1.3.99.31	0.0450552	0.00289137	0.0534811	0.00184424	0.0613656	0.00401912	0.0610568	0.00773176	0.0613567	0.00425292	0.0690142	0.00221807	6.719e-05	0.0002098
1.3.99.29	0.0450552	0.00289137	0.0534811	0.00184424	0.0613656	0.00401912	0.0610568	0.00773176	0.0613567	0.00425292	0.0690142	0.00221807	6.719e-05	0.0002098
1.3.99.26	0.0450552	0.00289137	0.0534811	0.00184424	0.0613656	0.00401912	0.0610568	0.00773176	0.0613567	0.00425292	0.0690142	0.00221807	6.719e-05	0.0002098
1.1.1.28	0.0122361	0.000640208	0.00977864	0.000483649	0.0131027	0.00132332	0.0152448	0.00436074	0.0159798	0.000516846	0.0169949	0.000996743	6.722e-05	0.0002098
1.5.99.15	0.000661334	0.000215324	0.00165792	0.000385426	0.00175098	0.00100682	0.000349453	0.000164455	0.000628189	0.000173128	0.00139119	0.000198196	6.731e-05	0.0002098
1.1.1.400	0.0110114	0.0013234	0.0110602	0.00154058	0.00863427	0.0014092	0.00739374	0.0025792	0.00522801	0.000525016	0.00542605	0.000458869	6.732e-05	0.0002098
2.3.1.282	8.10686e-05	0.000165223	0.00135878	0.000556103	0.000422635	0.000210086	4.51063e-05	4.01572e-05	4.88364e-05	3.64404e-05	0.00107721	6.82907e-05	6.734e-05	0.0002098
2.7.8.13	0.0507795	0.00129101	0.062891	0.00105117	0.0607901	0.0024353	0.0544678	0.00362619	0.0524437	0.00279093	0.0590732	0.00194657	6.74e-05	0.0002098
5.4.3.2	0.0413806	0.00493274	0.0531564	0.00497386	0.0648199	0.00996546	0.0383547	0.00268019	0.0621351	0.00967832	0.0574503	0.00362457	6.74e-05	0.0002098
1.4.7.1	0.0287091	0.000848903	0.0203183	0.00380441	0.0240833	0.0035309	0.0280077	0.00428341	0.0162454	0.00140016	0.0216184	0.00100643	6.751e-05	0.0002098
2.1.1.80	0.158173	0.00979398	0.111169	0.0193478	0.165269	0.0158773	0.13617	0.0185867	0.111183	0.00888792	0.112518	0.0024524	6.754e-05	0.0002098
1.14.15.3	0.00885762	0.000810899	0.017365	0.00184036	0.0147731	0.00410246	0.0177052	0.00395949	0.00950959	0.00156767	0.0191712	0.00170377	6.755e-05	0.0002098
1.8.3.7	0.0352582	0.00176343	0.0398617	0.0013004	0.048923	0.00460578	0.0341727	0.00174242	0.040586	0.00648104	0.0293293	0.00200775	6.773e-05	0.0002099
3.4.11.18	0.056174	0.00198803	0.061628	0.00118775	0.06359	0.00427376	0.0615779	0.00307997	0.0624337	0.0013043	0.0795195	0.00316374	6.785e-05	0.0002099
1.1.1.38	0.0540419	0.00214673	0.0444653	0.00304452	0.0531518	0.00581021	0.0509162	0.00211063	0.0456379	0.00245386	0.0588671	0.00202186	6.785e-05	0.0002099
4.4.1.24	0.0123822	0.000945246	0.0201317	0.00303669	0.0124849	0.00224098	0.0144035	0.00269557	0.00918441	0.000957106	0.00727098	0.00070092	6.787e-05	0.0002099
2.1.1.373	0.00879414	0.000885398	0.0068351	0.00106176	0.00494726	0.00133354	0.00654525	0.00137802	0.00501268	0.000573259	0.00413549	0.000659811	6.787e-05	0.0002099
1.1.1.26	0.0490081	0.00201968	0.0371494	0.00168693	0.0392606	0.00381229	0.0368724	0.0061818	0.0346185	0.00144549	0.0321895	0.0010988	6.792e-05	0.0002099
3.1.4.17	0.00909956	0.00120011	0.00988376	0.000869581	0.00640171	0.00171409	0.00821673	0.000596372	0.00695653	0.000732867	0.00389617	0.000367274	6.804e-05	0.0002099
1.14.14.28	0.00526142	0.000652991	0.00256765	0.000624127	0.00237072	0.00135254	0.00149384	0.00024465	0.00123332	0.000371385	0.00517253	0.0039708	6.805e-05	0.0002099
5.6.2.2	0.393612	0.0122594	0.461725	0.00638535	0.448452	0.0196635	0.443981	0.0457299	0.370805	0.0143806	0.474189	0.00837063	6.81e-05	0.0002099
6.2.2.1	0.00186837	0.000398251	0.000817543	0.000590119	0.00293432	0.000846871	0.00106525	0.000413483	0.000676609	0.000209265	0.000830965	0.000102273	6.81e-05	0.0002099
1.3.99.4	0.0415705	0.00287624	0.0175785	0.00153915	0.0218399	0.00434623	0.0167867	0.000711463	0.0210488	0.00343481	0.0214501	0.00103698	6.822e-05	0.00021
2.7.1.87	3.78171e-05	4.38436e-05	0	0	0	0	0	0	0	0	0.000208696	0.000207366	6.823e-05	0.00021
1.3.1.104	0.0142047	0.00101001	0.0124457	0.000525555	0.0152545	0.00101211	0.014725	0.00203778	0.0187719	0.00122772	0.0187793	0.00033366	6.833e-05	0.00021
3.2.1.165	0.0105957	0.00073005	0.0128005	0.000957765	0.0068196	0.00194694	0.00629101	0.00101059	0.0109877	0.00100691	0.00613208	0.000808164	6.833e-05	0.00021
5.4.2.9	0.00676268	0.000846444	0.00498022	0.00147015	0.00533174	0.000847588	0.00439579	0.00142179	0.0031061	0.000632367	0.00217219	0.000502977	6.837e-05	0.00021
4.4.1.34	0.00147475	0.000434407	0.000134504	0.000115327	0.000560565	0.000332363	0.00084509	6.3256e-05	0.000534858	0.000164873	0.000647359	0.000188397	6.851e-05	0.0002103
3.2.1.181	0.000207702	0.000137964	0	0	7.94184e-05	7.44871e-05	0	0	3.42018e-05	3.73953e-05	0	0	6.855e-05	0.0002103
2.7.7.104	0.000786294	0.000218611	0.000892599	0.00086464	0.00052048	0.000268935	0.000224986	0.000154384	0.000214842	6.78103e-05	6.56578e-06	1.10957e-05	6.87e-05	0.0002105
5.1.3.32	0.0120276	0.00120668	0.00961444	0.00116297	0.0107865	0.00265138	0.0059893	0.000907497	0.01229	0.00052573	0.0075638	0.000678844	6.873e-05	0.0002105
2.4.1.11	0.0715885	0.00160555	0.0562294	0.00313368	0.0705539	0.00253774	0.0681809	0.0100672	0.0860068	0.00154379	0.0815375	0.0024116	6.887e-05	0.0002108
2.7.1.89	0.00417877	0.000314259	0.0078259	3.23582e-05	0.00721622	0.00126944	0.00449846	0.0014786	0.00538856	0.000559087	0.00788277	0.000308719	6.916e-05	0.0002115
1.1.1.370	0.00508757	0.000476225	0.0065404	0.00111157	0.00782945	0.000833093	0.00428612	0.000553508	0.0059255	0.000488123	0.00518174	0.000685869	6.921e-05	0.0002115
4.2.1.84	0.0267485	0.00285845	0.013904	0.00171805	0.0154424	0.00328284	0.0183597	0.0035306	0.0133829	0.00207374	0.0121857	0.000700014	6.935e-05	0.0002118
2.3.1.267	0.0323204	0.00180078	0.0253428	0.00352907	0.0379178	0.00245468	0.0296999	0.00181883	0.0346998	0.00147414	0.036109	0.00224724	6.949e-05	0.000212
4.3.3.6	0.038225	0.00187299	0.0341341	0.00118423	0.0410577	0.00365066	0.0441602	0.00336442	0.0426304	0.00158281	0.056352	0.00128678	6.952e-05	0.000212
3.4.13.21	0.0107441	0.000622666	0.0101107	0.000901477	0.0134188	0.00263272	0.00839467	0.00193007	0.0162697	0.00141947	0.0134177	0.000632545	6.958e-05	0.000212
3.2.1.218	0.0144288	0.00107523	0.0248192	0.00365884	0.0197076	0.00305691	0.0152106	0.002113	0.025707	0.00345695	0.0148507	0.00100691	6.963e-05	0.000212
3.1.1.108	0.00614596	0.000679283	0.00374798	0.00070138	0.00546722	0.00192956	0.00343753	0.000351782	0.00204257	0.000430276	0.00715871	0.000776292	6.981e-05	0.0002123
1.14.15.28	0.0305628	0.0022953	0.0110079	0.000586007	0.015746	0.00396977	0.0172343	0.00261686	0.0196396	0.00336202	0.0195517	0.000798345	6.984e-05	0.0002123
1.13.11.24	0.0851388	0.00274944	0.0962341	0.00203759	0.0875133	0.00283813	0.0982698	0.00765367	0.0860071	0.00521687	0.106457	0.00466936	6.986e-05	0.0002123
1.1.1.183	0.00418253	0.000528831	0.00552322	0.000952303	0.00459685	0.000681494	0.00769651	0.00189628	0.00712174	0.000499777	0.00769928	0.00201466	6.991e-05	0.0002123
2.4.2.17	0.0427401	0.00135113	0.0478996	0.00217355	0.0481101	0.00282231	0.0481912	0.00189905	0.0484466	0.00101088	0.0528638	0.00139517	7e-05	0.0002124
4.2.1.144	0.00104657	0.000217127	0.00215001	0.000431485	0.00190023	0.000551661	0.00096155	0.000353216	0.000819137	0.000134919	0.00159495	0.000190708	7.009e-05	0.0002125
4.2.1.116	0.0136234	0.00128897	0.00654383	0.000567479	0.0119062	0.00259665	0.0190928	0.0020318	0.0180885	0.0020271	0.0136793	0.000606339	7.028e-05	0.0002126
1.3.1.31	0.0182633	0.00374028	0.0139952	0.00127489	0.00958045	0.0014945	0.0131572	0.00361397	0.0223475	0.00206456	0.0117164	0.000610006	7.033e-05	0.0002126
3.1.3.48	0.0655	0.00370755	0.0650783	0.0028548	0.0724849	0.00361868	0.0741526	0.00869913	0.0837775	0.00629049	0.100766	0.00323484	7.038e-05	0.0002126
2.7.8.31	0.0256344	0.00135322	0.0219712	0.0023498	0.0239379	0.00152356	0.0193274	0.00109569	0.0261169	0.00251719	0.0201932	0.0009632	7.038e-05	0.0002126
2.7.8.44	0.000117611	5.81123e-05	0.000407756	0.000316672	0.00032764	9.99475e-05	0.000289573	0.000142296	0.000431056	4.91722e-05	0.00329836	0.000384664	7.038e-05	0.0002126
1.1.5.4	0.0086486	0.000725765	0.0106262	0.000234117	0.0108195	0.000977103	0.0130751	0.00158432	0.0101622	0.000969061	0.0123303	0.0017698	7.041e-05	0.0002126
3.5.3.13	0.0120091	0.000974848	0.0150053	0.00178752	0.0135164	0.000972197	0.0127542	0.00387087	0.00705923	0.00134121	0.00837552	0.000490209	7.061e-05	0.000213
4.1.3.32	0.0183146	0.00123575	0.00800524	0.00028748	0.00952479	0.00289389	0.0123065	0.00214052	0.00854785	0.00141283	0.00902427	0.000597865	7.065e-05	0.000213
2.6.99.2	0.0238128	0.00187013	0.0302158	0.000592985	0.02624	0.00289592	0.0295629	0.00248764	0.0272777	0.00161583	0.0214268	0.00101449	7.069e-05	0.000213
1.1.1.402	0.00507584	0.000751179	0.00226482	0.000162613	0.0033286	0.000507799	0.00250063	0.00113585	0.00195243	0.000218276	0.00264916	0.000271654	7.084e-05	0.000213
3.1.1.45	0.114583	0.00471161	0.0972666	0.00787079	0.0888644	0.00856715	0.0937758	0.0100367	0.0846436	0.00940343	0.0768219	0.00173303	7.085e-05	0.000213
3.1.3.6	0.0676807	0.00322191	0.0801088	0.00298508	0.0889046	0.00974343	0.0721501	0.00622043	0.0828076	0.00805638	0.0656018	0.00268386	7.085e-05	0.000213
6.3.5.5	0.236898	0.00647097	0.281121	0.0043364	0.260262	0.0103167	0.256285	0.0267315	0.217501	0.00762554	0.28296	0.00352851	7.109e-05	0.0002134
5.1.1.13	0.0101939	0.00121006	0.0131968	0.00122525	0.0130993	0.00180518	0.0143385	0.00141171	0.0160537	0.00145703	0.0107483	0.000660598	7.109e-05	0.0002134
4.1.3.24	0.0213668	0.00141294	0.0143841	0.00309836	0.0172632	0.00228066	0.0230497	0.00207905	0.0205462	0.00191283	0.0303337	0.00107796	7.133e-05	0.0002138
1.11.1.9	0.0155522	0.000842615	0.0307578	0.0022097	0.0283404	0.00535976	0.0253136	0.00259627	0.0320668	0.00200947	0.0330517	0.00167464	7.141e-05	0.0002138
5.3.2.8	0.0135838	0.00170972	0.00523509	0.000225208	0.00568209	0.00143751	0.00616084	0.00219852	0.00488181	0.00122938	0.0032842	0.000286796	7.141e-05	0.0002138
3.4.22.8	0.000571656	0.00018868	0.000777323	0.00017551	0.00228433	0.000454324	0.00147937	0.000609276	0.00259628	0.000678549	0.00221883	0.000366827	7.141e-05	0.0002138
1.13.11.57	0.00546696	0.00090705	0.000922601	0.000294623	0.00128345	0.000771682	0.00111977	0.000392784	0.00200282	0.00042267	0.000878684	0.00026978	7.165e-05	0.0002142
3.2.1.205	0.00189268	0.000457564	0.000892751	0.000362705	0.00219913	0.000635245	0.000779703	0.000544769	0.000962771	0.000220859	0.000500981	8.61124e-05	7.165e-05	0.0002142
1.1.1.175	0.0067353	0.000909793	0.00597677	0.000922666	0.00553913	0.00114018	0.00446073	0.00113554	0.00285803	0.000499687	0.00349658	0.00020388	7.184e-05	0.0002146
2.7.9.5	0.000645636	0.000157824	0.000103649	7.33742e-05	0.00018274	0.000227362	2.59754e-05	4.90081e-05	0.000578981	0.000282766	0.00015693	5.32736e-05	7.197e-05	0.0002148
1.1.3.15	0.00268674	0.000482477	0.00220542	0.000582723	0.0018503	0.000480425	0.0017691	0.000239652	0.000946412	0.000243404	0.0013168	0.000411332	7.22e-05	0.0002154
1.14.13.168	0.00446238	0.000679671	0.00145837	0.000261363	0.00177453	0.000623291	0.000994958	0.00044931	0.00103492	0.000194762	0.00124182	0.000224706	7.238e-05	0.0002158
1.14.11.54	0.0031584	0.000911741	0.00299852	0.000201775	0.00583069	0.000890669	0.00859226	0.00572249	0.00554475	0.00105465	0.00776226	0.000417373	7.262e-05	0.0002163
4.1.3.17	0.0424207	0.00103497	0.0275316	0.00178904	0.0279012	0.00497603	0.0267958	0.00158758	0.0280458	0.00251689	0.0225517	0.00123991	7.277e-05	0.0002166
4.3.1.3	0.0405172	0.00105399	0.057308	0.00339535	0.0568651	0.00486109	0.0411491	0.00413961	0.046314	0.00639195	0.0521333	0.00183259	7.283e-05	0.0002166
2.1.1.202	5.3442e-05	4.38254e-05	0	0	0.000373114	0.000162804	6.17435e-05	7.56341e-05	0	0	5.18018e-06	1.26888e-05	7.292e-05	0.0002166
3.4.21.61	0.000936078	0.000176061	0.000707308	0.000243595	0.00111059	0.000121112	0.000490897	0.000109468	0.000448349	0.000117275	0.000587109	9.64466e-05	7.293e-05	0.0002166
2.1.1.380	0.0015877	0.000326142	0.000527893	0.000136051	0.000339151	0.000234867	0.000346155	0.000364851	0.000194149	0.000134133	3.20076e-05	2.94127e-05	7.334e-05	0.0002177
2.4.1.229	0.00219631	0.000401076	0.000772267	0.000321973	0.000760498	0.000323209	0.000391783	0.000528604	0.000170266	9.37992e-05	0.0002113	6.37777e-05	7.36e-05	0.0002183
2.4.1.13	0.0104956	0.00207197	0.00755118	0.000956818	0.0103702	0.00229101	0.0153528	0.0031471	0.021434	0.00129225	0.0130052	0.00105312	7.382e-05	0.0002187
6.3.2.33	0.00600398	0.000811386	0.00444292	0.000390755	0.00606279	0.00079911	0.0048317	0.000472168	0.00725633	0.00122812	0.00394527	0.000296569	7.382e-05	0.0002187
2.8.3.5	0.0221811	0.00224475	0.0263729	0.00133188	0.02366	0.00299377	0.0149229	0.00324851	0.0112158	0.00108808	0.0203979	0.00475814	7.39e-05	0.0002187
4.3.1.32	0.0312439	0.00310848	0.0198266	0.00115584	0.0210167	0.00441899	0.0293095	0.00291051	0.0225089	0.00380208	0.0317196	0.00115607	7.395e-05	0.0002187
2.3.1.178	0.00416603	0.000299848	0.00181392	0.000222438	0.00432866	0.00119352	0.00223065	0.000751059	0.00262705	0.000435234	0.00217057	0.000365279	7.4e-05	0.0002187
1.5.1.2	0.0431597	0.00124794	0.0471398	0.00213212	0.0466651	0.00209196	0.0488263	0.00304351	0.0500077	0.00184217	0.0526293	0.0013982	7.416e-05	0.0002191
1.1.2.7	0.000584863	0.000234922	0.000263942	0.000106267	0.000214882	0.000386206	1.09293e-05	2.67712e-05	1.54209e-05	1.84345e-05	0.000107434	7.45942e-05	7.426e-05	0.0002192
1.3.99.16	0.0913935	0.00500716	0.134499	0.00778142	0.0913559	0.00366094	0.129233	0.0104204	0.13501	0.00938932	0.0942858	0.00696265	7.456e-05	0.00022
4.2.1.8	0.0242433	0.00204162	0.0310833	0.00156286	0.0320027	0.00241659	0.0232019	0.00347298	0.0322977	0.00110307	0.025658	0.000995626	7.476e-05	0.0002202
5.4.3.9	0.000256839	0.000111439	0.000703306	0.000216412	0.000633153	0.000104554	0.00193626	0.000892287	0.000983457	0.000437882	0.000627579	0.000340459	7.481e-05	0.0002202
6.3.2.38	0.000542708	0.000383495	0	0	0.000190839	0.000400455	0	0	0	0	0.00017467	0.000211182	7.487e-05	0.0002202
1.1.1.157	0.0776714	0.00296265	0.0800381	0.00505864	0.069988	0.00389833	0.0680707	0.00372919	0.0689501	0.0034607	0.0834744	0.00383693	7.497e-05	0.0002202
1.14.99.69	0.00561897	0.000776953	0.00878659	0.00124488	0.00953207	0.00156369	0.0112821	0.00178719	0.00767804	0.000992785	0.00920657	0.000729652	7.497e-05	0.0002202
3.4.24.27	0.000319909	0.000127931	5.22509e-05	4.54786e-05	9.58338e-05	8.67002e-05	3.44437e-05	2.45804e-05	1.96842e-05	2.84286e-05	0.000172791	7.33634e-05	7.5e-05	0.0002202
5.3.3.10	0.00460185	0.000614158	0.00109252	0.000289001	0.00205335	0.000592835	0.0013221	0.000627073	0.00271056	0.000218259	0.00258569	0.00097721	7.502e-05	0.0002202
2.3.1.37	0.014786	0.00138984	0.0158247	0.000791318	0.0142865	0.000816294	0.0199699	0.00441371	0.0100474	0.00167676	0.018073	0.00127697	7.507e-05	0.0002202
3.1.1.2	0.0542886	0.00272722	0.0592153	0.00188948	0.0471057	0.00409836	0.0468143	0.00282698	0.0526722	0.00110387	0.0442084	0.00190071	7.535e-05	0.0002207
3.1.3.73	0.0274532	0.00150989	0.0225546	0.000755564	0.0269717	0.00243152	0.0304257	0.0060173	0.0368325	0.00482844	0.0465395	0.00253091	7.542e-05	0.0002207
4.2.1.103	0.0175416	0.00199821	0.00844145	0.000678677	0.0118	0.00218501	0.0179008	0.00325786	0.0146765	0.00153004	0.0124382	0.00120265	7.542e-05	0.0002207
3.1.3.2	0.0214086	0.00128166	0.0162402	0.000612606	0.016517	0.0024099	0.0138899	0.00182473	0.0135632	0.00212127	0.0123904	0.00107085	7.545e-05	0.0002207
3.7.1.14	0.0462526	0.00125745	0.0286597	0.00101929	0.0358093	0.00201665	0.0361914	0.00518188	0.0381126	0.00344142	0.039018	0.00139944	7.576e-05	0.0002212
6.1.1.7	0.13377	0.00379654	0.151583	0.00385384	0.149374	0.00537008	0.147554	0.00726782	0.132703	0.00358195	0.15067	0.00165283	7.583e-05	0.0002212
1.4.1.21	0.006671	0.00152855	0.00408759	0.000607414	0.00467667	0.000335516	0.00598729	0.00230769	0.00375997	0.000696154	0.00239538	0.000176731	7.583e-05	0.0002212
4.2.1.55	0.041791	0.00109979	0.0305271	0.0018988	0.0313706	0.00532873	0.0285698	0.00327018	0.03205	0.00227219	0.0262249	0.00120983	7.586e-05	0.0002212
6.3.1.10	0.0130448	0.00106547	0.0106228	0.000448319	0.0121826	0.00148037	0.0114944	0.00201496	0.00782577	0.000853225	0.00837533	0.000428899	7.588e-05	0.0002212
1.12.98.4	0.0163434	0.00152785	0.0218765	0.00214823	0.0258667	0.00198745	0.0212681	0.00508671	0.0245417	0.00199119	0.0313234	0.00101484	7.608e-05	0.0002217
2.7.6.5	0.129773	0.00453497	0.163779	0.00151534	0.151037	0.00571084	0.158023	0.00431168	0.15157	0.00574859	0.15587	0.00229263	7.622e-05	0.0002218
2.7.1.187	0.0049106	0.00101654	0.00371332	0.000835284	0.00878504	0.000978695	0.00899186	0.00386153	0.00995094	0.0015268	0.017181	0.000753685	7.624e-05	0.0002218
4.3.1.30	0.000182158	6.27721e-05	1.61167e-05	2.7915e-05	2.38872e-05	3.17542e-05	0	0	0	0	5.8497e-06	1.43288e-05	7.632e-05	0.0002219
6.3.1.19	0.0158595	0.000917864	0.0127446	0.00176233	0.0129765	0.00326097	0.0189667	0.00280042	0.0157724	0.00241398	0.0311041	0.00105735	7.644e-05	0.0002221
1.5.98.3	0.00174145	0.000525495	0.00240331	0.000661717	0.0115634	0.00737702	0.000552285	0.000178048	0.00163668	0.000735113	0.0016742	0.000495209	7.654e-05	0.0002222
1.14.99.61	0.00424021	0.000423379	0.00136098	0.00017796	0.00344464	0.00106005	0.00252048	0.000786924	0.00200713	0.000274977	0.0033062	0.000400279	7.658e-05	0.0002222
4.1.1.81	0.00448933	0.000539523	0.00360554	0.000753782	0.00437963	0.000986828	0.00648913	0.00153453	0.0023727	0.000301137	0.00327621	0.0005767	7.67e-05	0.0002224
1.4.5.1	0.0214571	0.00134674	0.0309685	0.00202897	0.0261097	0.00275654	0.0253665	0.00325376	0.0172337	0.00118022	0.0252006	0.00321936	7.678e-05	0.0002225
1.13.11.8	0.0184361	0.000752464	0.0101669	0.000779572	0.00890466	0.00168445	0.00645527	0.00343406	0.0127563	0.00399937	0.00705641	0.000568962	7.696e-05	0.0002228
3.2.1.31	0.0146337	0.00144364	0.0122782	0.00145613	0.0109362	0.00170206	0.0104086	0.00165099	0.0217362	0.00142341	0.0112812	0.00112168	7.706e-05	0.000223
5.3.3.12	0.000133377	7.07735e-05	0.000209319	0.000147523	0.000370995	0.00012927	4.26858e-05	4.89227e-05	4.59709e-05	3.8661e-05	0.00035607	0.000131193	7.73e-05	0.0002234
3.1.6.6	0.162612	0.0080539	0.123502	0.0121929	0.141237	0.00651405	0.14801	0.0120603	0.16108	0.0126596	0.103859	0.0030984	7.732e-05	0.0002234
3.5.4.5	0.0167254	0.000718051	0.0239577	0.00298685	0.0263894	0.00206226	0.0226108	0.0042354	0.0244803	0.000878084	0.0277332	0.00123232	7.735e-05	0.0002234
7.6.2.12	0.0016315	0.000444061	0.0053721	0.00078466	0.00389666	0.000894968	0.00348097	0.00182021	0.00150139	0.00048163	0.00271294	0.000440264	7.74e-05	0.0002234
3.1.4.46	0.116395	0.00462534	0.113861	0.00415245	0.122982	0.00873846	0.130893	0.0101179	0.147627	0.00878408	0.141557	0.00385323	7.751e-05	0.0002235
3.2.1.184	0.0030669	0.000534983	0.000937108	0.000208	0.00292208	0.000838169	0.00148642	0.000653189	0.000931188	0.000346157	0.000749102	0.000148444	7.789e-05	0.0002245
1.5.98.2	0.114032	0.00462633	0.0586549	0.00468026	0.0758539	0.0137311	0.0783041	0.00721311	0.0854036	0.0126363	0.0717838	0.0028002	7.808e-05	0.0002248
2.3.1.79	0.0197178	0.00182615	0.0192692	0.0011724	0.0174975	0.0013109	0.0202069	0.0042801	0.0272429	0.00264363	0.0338247	0.00357917	7.81e-05	0.0002248
7.3.2.2	0.0205763	0.00109727	0.0162742	0.000638403	0.0192296	0.00163488	0.0191323	0.00245086	0.0165089	0.000848266	0.0130422	0.000454989	7.821e-05	0.0002248
6.2.1.72	0.00980911	0.000772694	0.00496822	0.000277217	0.00715091	0.00149769	0.0107341	0.00165523	0.00925221	0.000938924	0.00651196	0.000415978	7.821e-05	0.0002248
3.4.13.22	0.0152589	0.00150387	0.00940975	0.00034727	0.00863129	0.00107938	0.0111032	0.00107057	0.0100824	0.00125902	0.00975698	0.000747044	7.852e-05	0.0002254
5.1.3.20	0.00682446	0.000859155	0.013196	0.000979859	0.00850478	0.00266208	0.00983692	0.0012193	0.0113527	0.000769868	0.00588595	0.00153129	7.852e-05	0.0002254
4.1.1.111	0.0223825	0.00153393	0.0225343	0.00147646	0.0203063	0.00250442	0.0167327	0.00433647	0.013956	0.00178805	0.0243532	0.00114206	7.868e-05	0.0002257
1.14.14.27	0.00197641	0.000339922	0.000215187	0.000217802	0.000388171	0.000246584	0.000135881	0.000161783	6.85644e-05	8.59626e-05	0.000317869	6.64643e-05	7.919e-05	0.0002262
1.8.4.12	0.0547785	0.0017348	0.0614579	0.00584859	0.0534059	0.00446397	0.0597767	0.00230574	0.069357	0.00102184	0.060712	0.00149845	7.924e-05	0.0002262
6.2.1.31	0.00187967	0.000417623	0.00127142	0.000295617	0.000861591	0.000355724	0.000930206	0.000491042	0.000299405	0.000103216	0.000656637	0.000199922	7.924e-05	0.0002262
3.4.19.11	0.00262507	0.00035258	0.00143962	0.000543188	0.00250759	0.000361213	0.00170946	0.000298431	0.00243885	0.000557564	0.0010047	0.000296613	7.937e-05	0.0002262
1.1.1.311	0.00149727	0.000339891	0.000155836	7.88788e-05	0.000269515	0.00021995	0.000279318	0.000442933	1.2829e-05	1.77547e-05	0.0001364	5.99379e-05	7.937e-05	0.0002262
1.11.1.20	0	0	0.000100432	9.60441e-05	0.000395124	0.000214351	0.000168389	8.90235e-05	0.00014018	9.61141e-05	3.73893e-05	5.79351e-05	7.939e-05	0.0002262
3.6.1.31	0.0214943	0.000518503	0.0276652	0.000786767	0.0286398	0.00300199	0.0240631	0.00373914	0.0255351	0.00136481	0.0313831	0.00111495	7.942e-05	0.0002262
2.7.7.42	0.071041	0.00309863	0.0764294	0.00010749	0.0667516	0.0030828	0.0673528	0.00659651	0.0632883	0.0028239	0.0795028	0.00170467	7.946e-05	0.0002262
2.7.7.89	0.071041	0.00309863	0.0764294	0.00010749	0.0667516	0.0030828	0.0673528	0.00659651	0.0632883	0.0028239	0.0795028	0.00170467	7.946e-05	0.0002262
5.1.1.7	0.0401147	0.000918416	0.0488217	0.00180368	0.0428592	0.0027753	0.0474444	0.00260148	0.0480737	0.00173978	0.049443	0.000665502	7.946e-05	0.0002262
2.4.99.25	0.0133253	0.00168349	0.00948025	0.00213314	0.0107556	0.00145352	0.00680653	0.00155362	0.0105625	0.00252693	0.00726372	0.000571003	7.946e-05	0.0002262
1.14.13.233	0.00452304	0.000591653	0.000641081	0.00021561	0.00195276	0.000922977	0.000945255	0.000275647	0.000775982	0.000251871	0.000446403	8.91342e-05	7.951e-05	0.0002262
3.2.1.166	0.00144842	0.000314424	0.000413768	0.000152481	0.00125816	0.000502473	0.00175813	0.000285377	0.00553722	0.00121747	0.000999276	0.000135597	7.978e-05	0.0002268
2.7.8.38	0.000129876	0.000103506	0.000112902	0.000102468	0.000734686	0.000567591	4.94798e-06	1.212e-05	4.01234e-05	5.21311e-05	0.000303427	0.000119834	7.985e-05	0.0002269
1.1.1.27	0.012627	0.00135594	0.00872652	0.000835432	0.0149951	0.00109799	0.0142382	0.00365269	0.0105456	0.000923259	0.0189194	0.00053185	7.99e-05	0.0002269
2.7.7.71	0.000997397	0.000211426	0.00185208	0.000465763	0.00207244	0.000328086	0.000925241	0.000437367	0.00178621	0.000314185	0.000853366	9.14261e-05	8.001e-05	0.0002269
1.1.1.424	0.0017646	0.000146133	0.00146932	0.000262002	0.00129496	0.000276273	0.000684651	0.00015448	0.00110616	0.00026984	0.00162049	0.000230786	8.001e-05	0.0002269
3.1.2.14	0.000836299	0.000253881	0.00162184	0.000263157	0.00279669	0.00131535	0.00177931	0.000831696	0.0046721	0.00163726	0.00156339	0.000468191	8.015e-05	0.0002271
3.8.1.2	0.0566001	0.00440139	0.0513661	0.00163222	0.0418254	0.0041369	0.0483682	0.00407384	0.0417833	0.00351945	0.0421042	0.00124426	8.033e-05	0.0002271
2.3.1.228	0.000467234	0.000123448	3.12104e-05	3.2579e-05	0.00025492	0.000197005	8.98477e-05	8.70738e-05	0	0	9.54339e-05	4.6586e-05	8.034e-05	0.0002271
2.3.1.229	0.000467234	0.000123448	3.12104e-05	3.2579e-05	0.00025492	0.000197005	8.98477e-05	8.70738e-05	0	0	9.54339e-05	4.6586e-05	8.034e-05	0.0002271
2.7.1.45	0.0311681	0.00243623	0.0271426	0.00188301	0.0327851	0.00344444	0.0233616	0.00351277	0.0320288	0.0016065	0.0238575	0.00101635	8.044e-05	0.0002271
1.3.1.88	0	0	9.83037e-05	7.34145e-05	0	0	1.4165e-05	3.46969e-05	0	0	0	0	8.048e-05	0.0002271
1.2.3.14	0	0	8.26625e-05	4.69933e-05	0	0	0	0	0	0	1.84893e-05	4.52892e-05	8.048e-05	0.0002271
2.6.1.9	0.0846566	0.00185132	0.0968674	0.00451857	0.0888555	0.00332324	0.0946926	0.00413362	0.0869327	0.00303391	0.0957741	0.00233715	8.075e-05	0.0002277
2.4.1.186	0.000732259	0.000130983	0.000161197	0.000100324	0.000422388	0.000174691	0.000231461	0.000131432	0.000366609	9.78867e-05	0.000178419	0.000104254	8.087e-05	0.0002279
1.1.1.333	0.00838687	0.000746943	0.00525462	0.000645166	0.00671539	0.000195973	0.00733416	0.00127552	0.0086236	0.00108559	0.00992849	0.00038048	8.093e-05	0.0002279
6.3.1.21	0.00470557	0.000728403	0.00719078	0.000740671	0.00929007	0.00122357	0.00642807	0.000749868	0.00592633	0.000847448	0.00737818	0.00146484	8.12e-05	0.0002286
6.1.1.18	0.0620636	0.00127379	0.0716869	0.00385099	0.0660832	0.00430069	0.0684797	0.00276465	0.0689858	0.00322805	0.0529291	0.00185026	8.131e-05	0.0002287
1.8.5.2	0.0175427	0.000537844	0.0165299	0.00197731	0.0171713	0.00199826	0.00978187	0.0007531	0.0182516	0.00110763	0.0135668	0.000526414	8.164e-05	0.0002294
6.2.1.59	0.00153976	0.000301071	0.000633609	0.0003059	0.00155398	0.000255383	0.000965913	0.00014455	0.000646462	0.00012095	0.00153144	0.000173424	8.169e-05	0.0002294
4.1.2.29	0	0	0.000128308	6.69218e-05	4.32386e-05	5.52476e-05	0	0	1.3995e-05	2.7108e-05	0.000570364	0.000925355	8.17e-05	0.0002294
2.3.1.165	0.00147647	0.000301988	0.000466328	0.000216037	0.000753716	0.000250294	0.000441855	0.000100098	0.000420356	0.0001071	0.000649345	0.000185234	8.18e-05	0.0002295
4.1.1.87	0.000455219	0.000161324	0.00021435	0.000121204	0.000111427	0.00012932	9.99045e-05	0.000117875	3.15746e-05	4.0134e-05	0.00100907	0.00070298	8.197e-05	0.0002298
1.14.13.7	0.0108352	0.00151218	0.00422567	0.000284301	0.00516406	0.00189382	0.00415928	0.00157869	0.0061398	0.00202282	0.00280276	0.000340384	8.208e-05	0.00023
1.7.2.3	0.0218871	0.00648341	0.0137981	0.00170041	0.0142836	0.00437209	0.00513234	0.00105642	0.0174139	0.0039478	0.0106259	0.000471094	8.219e-05	0.0002301
6.3.4.21	0.0484009	0.00178209	0.0451222	0.0028585	0.0498343	0.00197358	0.04322	0.00282722	0.037632	0.00203562	0.0456984	0.00221979	8.235e-05	0.0002303
1.12.1.4	0.000475049	0.000197689	0.000776443	0.000323507	0.00196102	0.000823653	0.00080276	0.000377092	0.00204191	0.000643226	0.000996537	0.000135685	8.235e-05	0.0002303
1.14.14.21	0.000397986	0.000127258	4.57435e-05	7.923e-05	0.000173271	0.000137649	0.000174576	9.20838e-05	7.43963e-05	6.73667e-05	0.00131827	0.00122167	8.253e-05	0.0002305
2.7.1.21	0.0166683	0.000805118	0.028368	0.00221687	0.0234878	0.00276436	0.0239502	0.00412147	0.0237441	0.001542	0.0207766	0.000791474	8.256e-05	0.0002305
1.1.1.262	0.030852	0.00152136	0.0387555	0.00189006	0.0323421	0.00303128	0.0362192	0.00317612	0.0334376	0.00194814	0.0261946	0.00158744	8.267e-05	0.0002307
3.2.1.169	0.00143791	0.000324042	0.000622738	0.000165743	0.00171181	0.000375625	0.000836919	0.000458158	0.00146721	0.000241544	0.00610765	0.00105574	8.278e-05	0.0002309
7.5.2.4	0.00429617	0.000610292	0.00164221	0.000381349	0.00490509	0.00101801	0.00548605	0.000763882	0.00436525	0.000530128	0.00862354	0.00119708	8.296e-05	0.0002309
2.6.1.97	9.45438e-05	4.93985e-05	0.00043544	0.000104308	0.00334552	0.00211233	6.73562e-05	0.000132674	0.000149322	0.0002189	0.000379542	0.000152453	8.302e-05	0.0002309
1.6.1.1	0.0168244	0.00150394	0.0102819	0.00111078	0.0110911	0.0019929	0.00849956	0.00215856	0.00994314	0.00121076	0.0125998	0.00128077	8.307e-05	0.0002309
6.6.1.2	0.0544132	0.00622247	0.0432476	0.00369478	0.0505906	0.00592597	0.0540967	0.0130011	0.030816	0.00410601	0.0398292	0.00185976	8.313e-05	0.0002309
2.5.1.30	0.00603418	0.00043258	0.00597934	0.000673828	0.00482568	0.00119622	0.00777985	0.00109312	0.00646337	0.000838671	0.0119768	0.0013134	8.313e-05	0.0002309
3.2.1.83	0.000129571	6.13302e-05	9.25788e-05	0.000129804	0.000368564	0.000194202	0.000383961	0.000132789	0.000952855	0.000374178	0.000114728	6.74175e-05	8.313e-05	0.0002309
2.1.1.265	0.0275769	0.000966463	0.0292663	0.00297489	0.0317716	0.00120029	0.0240412	0.00252137	0.0298402	0.00163913	0.0312568	0.00141791	8.33e-05	0.0002312
1.5.3.1	0.0815362	0.00571781	0.0725519	0.00262857	0.0741222	0.00957702	0.0877758	0.0234841	0.0571376	0.00225349	0.0547157	0.00274089	8.347e-05	0.0002316
6.2.1.12	0.0138033	0.00107877	0.00914945	0.00136627	0.00834979	0.00252405	0.00883757	0.00306996	0.00484158	0.00126746	0.00615191	0.000431284	8.386e-05	0.0002324
1.1.5.9	0.0335493	0.00344769	0.0179293	0.00134738	0.0165721	0.00292356	0.0197117	0.00419976	0.0191246	0.00305313	0.0137888	0.00152482	8.39e-05	0.0002324
1.1.1.34	0.0140632	0.000984076	0.0148532	0.00182511	0.0180652	0.00254003	0.0209999	0.00246063	0.0213142	0.000995423	0.0190241	0.00131654	8.397e-05	0.0002325
2.4.1.345	0.0280486	0.00155289	0.0194417	0.00140246	0.0256194	0.00345809	0.020383	0.0035489	0.0235376	0.00259321	0.0302517	0.000772105	8.423e-05	0.000233
2.5.1.82	6.97757e-05	4.39537e-05	2.56486e-05	2.22136e-05	9.26384e-06	1.47656e-05	0	0	0	0	4.78218e-06	1.17139e-05	8.425e-05	0.000233
1.14.11.4	0.000414349	0.000182398	0.000179257	0.000214942	0.000668451	0.000204232	7.42786e-05	5.44383e-05	0.000252636	0.000107935	7.73184e-05	5.65323e-05	8.448e-05	0.0002334
1.1.1.281	0.0141997	0.000856929	0.0104951	0.000348672	0.0115657	0.00175115	0.00931507	0.000882232	0.0136638	0.00136299	0.0101276	0.000648893	8.457e-05	0.0002336
1.1.2.6	0.0249535	0.00226582	0.0100765	0.00087759	0.0135819	0.00288064	0.0130671	0.0024952	0.013994	0.0027996	0.00963188	0.0005228	8.497e-05	0.0002345
1.14.13.235	0.0203405	0.00203583	0.01005	0.000495944	0.0104102	0.00301874	0.0130161	0.00160148	0.0126913	0.00294466	0.00911507	0.00130273	8.532e-05	0.0002353
1.10.3.17	0.013564	0.000839113	0.0173358	0.00092907	0.0169394	0.00186886	0.011609	0.00257342	0.0116474	0.0028273	0.0170075	0.000867453	8.539e-05	0.0002354
2.8.3.22	0.0154191	0.00128998	0.00849757	0.000299475	0.00904158	0.00137231	0.0100442	0.0026704	0.00737699	0.001136	0.0101498	0.000719676	8.545e-05	0.0002354
2.3.3.8	0.00251305	0.000306533	0.00267046	0.000698964	0.00343397	0.000592163	0.00161229	0.000516621	0.00372253	0.000693856	0.00176431	0.000493653	8.554e-05	0.0002354
4.2.1.100	0.00629846	0.000779527	0.00674075	0.000775924	0.00279428	0.000405755	0.00391643	0.00181771	0.00521859	0.00147065	0.00179079	0.000255493	8.556e-05	0.0002354
1.8.4.16	0.0205717	0.000785292	0.0383136	0.0016196	0.0311137	0.00587608	0.0337024	0.00361442	0.0341454	0.00106717	0.0312325	0.00136853	8.566e-05	0.0002355
5.4.99.63	0.0307844	0.00238973	0.0233898	0.00305299	0.0287364	0.00349649	0.0373989	0.00380146	0.0298672	0.00411919	0.0539484	0.00246226	8.585e-05	0.0002357
3.1.1.15	0.0132389	0.00111317	0.00822286	0.000470356	0.0102728	0.00201867	0.00775348	0.00106214	0.00806924	0.000871861	0.0070072	0.000396328	8.595e-05	0.0002357
3.1.2.6	0.184481	0.00354353	0.180971	0.00776367	0.204411	0.00728665	0.196892	0.0182757	0.221661	0.00889554	0.215631	0.00298092	8.602e-05	0.0002357
1.8.3.6	7.99743e-06	2.39923e-05	0.000178073	0.000147334	9.54691e-05	6.64269e-05	2.81087e-05	3.34172e-05	0.000246845	0.000113312	4.74001e-06	1.16106e-05	8.604e-05	0.0002357
1.8.3.5	7.99743e-06	2.39923e-05	0.000178073	0.000147334	9.54691e-05	6.64269e-05	2.81087e-05	3.34172e-05	0.000246845	0.000113312	4.74001e-06	1.16106e-05	8.604e-05	0.0002357
2.3.3.5	0.00568382	0.000719251	0.0100772	0.00106287	0.0109397	0.00210835	0.00894056	0.00219283	0.00701288	0.000835234	0.0101619	0.00162833	8.608e-05	0.0002357
3.1.3.39	0.000100842	4.45728e-05	3.76022e-05	6.51289e-05	1.86729e-05	3.15524e-05	0	0	0	0	0	0	8.636e-05	0.0002363
3.5.1.1	0.0473583	0.00178302	0.0729346	0.00194249	0.0738623	0.00978851	0.0653375	0.00477456	0.070729	0.00233147	0.0662095	0.00209596	8.664e-05	0.0002367
2.5.1.147	0.0323325	0.00308232	0.0205496	0.00144689	0.0230975	0.00374093	0.0307713	0.00284471	0.0228224	0.00384862	0.0322267	0.00121549	8.67e-05	0.0002367
3.1.2.12	0.00836279	0.000795745	0.0120141	0.000535606	0.0105793	0.00145048	0.0158198	0.00279086	0.00968963	0.00125759	0.0103635	0.00120623	8.672e-05	0.0002367
4.2.1.36	0.00151921	0.000231275	0.00208481	0.000560489	0.00334075	0.00132528	0.00245653	0.000943308	0.00618901	0.00237648	0.00216119	0.00019686	8.672e-05	0.0002367
1.1.1.432	0.00519743	0.00119942	0.00914919	0.000872936	0.0102856	0.00206594	0.0108137	0.00327508	0.00657951	0.00117767	0.00845967	0.000908077	8.676e-05	0.0002367
1.21.98.5	0.0196818	0.00180772	0.0163332	0.000764441	0.0119399	0.00274907	0.0129413	0.00412466	0.00983789	0.00243089	0.00842345	0.000305538	8.682e-05	0.0002367
3.5.2.18	0.00229368	0.000269603	0.00427976	0.000553589	0.00356299	0.000471434	0.00288906	0.000738323	0.00225576	0.000662287	0.00436983	0.000244049	8.701e-05	0.000237
3.1.3.5	0.15836	0.00791107	0.18803	0.00849351	0.20258	0.00654478	0.174346	0.0178204	0.191431	0.00883381	0.174079	0.00271959	8.719e-05	0.0002374
1.1.2.10	0.0126673	0.00170604	0.00681744	0.00144055	0.00692362	0.00210956	0.00587243	0.00252741	0.00401093	0.000434248	0.00722709	0.000566516	8.73e-05	0.0002375
2.7.1.31	0.00272599	0.00043986	0.00750508	0.000627138	0.00273089	0.000732614	0.00655913	0.00165218	0.00411104	0.00076011	0.00240802	0.000481983	8.736e-05	0.0002375
2.4.1.341	0.000271571	9.48752e-05	0.000903545	0.000553886	0.000490939	0.000139808	0.000273668	0.000122861	0.000529571	9.26648e-05	0.000125925	4.72471e-05	8.787e-05	0.0002388
4.2.1.28	0.00853589	0.00113504	0.00342652	0.000871199	0.00592342	0.00110881	0.00539705	0.00105668	0.00574749	0.000640905	0.00676557	0.000617819	8.813e-05	0.000239
3.5.99.10	0.103674	0.00591049	0.103007	0.00979093	0.0838986	0.00695803	0.0765443	0.00356314	0.0768198	0.00339448	0.0777688	0.00366094	8.817e-05	0.000239
4.3.3.8	0.000449485	0.00019179	8.27935e-05	9.71509e-05	0.00025963	0.000204468	2.95047e-06	7.22713e-06	0.000103635	6.54249e-05	8.11828e-06	1.98856e-05	8.821e-05	0.000239
2.4.3.4	0	0	0	0	2.641e-05	4.09142e-05	1.51321e-05	2.63997e-05	0	0	0.000206211	5.13224e-05	8.823e-05	0.000239
2.4.3.2	0	0	0	0	2.641e-05	4.09142e-05	1.51321e-05	2.63997e-05	0	0	0.000206211	5.13224e-05	8.823e-05	0.000239
1.5.8.4	0.0499689	0.00431351	0.0727573	0.00372115	0.0545318	0.00538255	0.0762853	0.0283935	0.0315555	0.00268597	0.0510126	0.000934057	8.83e-05	0.000239
1.14.11.58	0.00915917	0.000737663	0.00649967	0.000742679	0.00603917	0.00095291	0.00820506	0.00116621	0.00506559	0.000695962	0.00624877	0.000902998	8.846e-05	0.0002393
2.1.1.116	9.04892e-05	8.02998e-05	0	0	6.77151e-05	4.99213e-05	0	0	0	0	0	0	8.873e-05	0.0002399
3.1.1.5	0.0709293	0.00286979	0.072007	0.00220391	0.0618745	0.00408082	0.0611605	0.00425804	0.0715066	0.000879955	0.0592231	0.00226177	8.884e-05	0.00024
1.3.1.58	0.000154525	8.82416e-05	1.50329e-05	1.31929e-05	2.51344e-05	4.16635e-05	3.76852e-06	9.23095e-06	5.79045e-06	8.98015e-06	0.000100266	5.56758e-05	8.91e-05	0.0002406
2.1.1.137	0.167672	0.00580982	0.167017	0.00350034	0.13714	0.00730844	0.141649	0.00937733	0.153432	0.00971741	0.146942	0.0048568	8.92e-05	0.0002407
1.4.1.16	0.000232203	0.000157045	0.000324514	0.000114058	0.00119013	0.000677742	0.000124284	0.000203261	0	0	0.000193637	8.84696e-05	8.957e-05	0.0002415
2.4.2.7	0.031222	0.00152645	0.0314833	0.00146831	0.031862	0.00123276	0.0268122	0.00200589	0.0249497	0.00108089	0.0342914	0.00283388	8.972e-05	0.0002415
4.1.1.38	0.00946771	0.0010308	0.00922957	0.00261505	0.00912386	0.000833164	0.00653727	0.001376	0.0113896	0.00241792	0.0269265	0.00133567	8.978e-05	0.0002415
3.6.1.75	0.00135313	0.000184235	0.000877053	0.000113655	0.00280413	0.000580462	0.00155599	0.000498296	0.00238339	0.000556106	0.00111116	0.000329166	8.984e-05	0.0002415
1.3.8.15	1.85315e-05	2.97615e-05	0.000106593	0.000147911	1.01219e-05	2.47935e-05	0.000260893	0.000193102	9.77332e-05	5.52602e-05	0.000398916	9.11675e-05	8.986e-05	0.0002415
1.1.1.49	0.0931567	0.00330169	0.0653623	0.00190857	0.0774852	0.00664769	0.0786149	0.00292742	0.0854684	0.00627172	0.0816749	0.00208908	8.99e-05	0.0002415
1.1.1.363	0.0931567	0.00330169	0.0653623	0.00190857	0.0774852	0.00664769	0.0786149	0.00292742	0.0854684	0.00627172	0.0816749	0.00208908	8.99e-05	0.0002415
3.1.4.53	0.0529429	0.00169242	0.0561831	0.00183645	0.0541709	0.00392147	0.0567523	0.00171575	0.06337	0.00362039	0.0611539	0.00178479	9.002e-05	0.0002416
1.3.3.6	0.00788406	0.00156566	0.00358182	0.00059549	0.00844725	0.00281102	0.00532529	0.000934599	0.00507446	0.000831606	0.00598525	0.000354575	9.004e-05	0.0002416
4.2.3.19	0.000115379	5.25636e-05	1.65401e-05	2.86484e-05	4.14222e-05	0.000101463	0	0	0	0	0	0	9.014e-05	0.0002417
4.3.1.27	0.00186645	0.000267497	0.00347333	0.00114672	0.00127732	0.000392834	0.00177147	0.00083545	0.00278122	0.000264378	0.000774951	0.000180418	9.02e-05	0.0002417
2.4.1.342	0.0429406	0.00211254	0.0321488	0.000922194	0.0400039	0.00205817	0.0380243	0.00461497	0.0424343	0.00182966	0.0504927	0.000945059	9.058e-05	0.0002426
2.1.1.329	0.0038937	0.000500208	0.00241903	0.000349661	0.00194093	0.000486876	0.00435134	0.000965163	0.0027462	0.00063747	0.00235597	0.000281902	9.068e-05	0.0002427
5.3.4.1	0.00954899	0.00121239	0.0197475	0.00200842	0.0122756	0.00240117	0.0138616	0.00251584	0.0162855	0.00270039	0.0165773	0.00205314	9.076e-05	0.0002427
2.7.1.137	3.99646e-05	7.94608e-05	0.000327179	0.000238615	0.000154876	0.000203606	0	0	0	0	0	0	9.135e-05	0.0002438
6.3.4.11	6.68859e-05	5.32756e-05	7.52944e-06	1.30414e-05	0.000303918	0.000233955	0	0	6.54601e-05	2.39608e-05	2.60646e-05	1.92411e-05	9.139e-05	0.0002438
6.3.4.9	6.68859e-05	5.32756e-05	7.52944e-06	1.30414e-05	0.000303918	0.000233955	0	0	6.54601e-05	2.39608e-05	2.60646e-05	1.92411e-05	9.139e-05	0.0002438
6.3.4.10	6.68859e-05	5.32756e-05	7.52944e-06	1.30414e-05	0.000303918	0.000233955	0	0	6.54601e-05	2.39608e-05	2.60646e-05	1.92411e-05	9.139e-05	0.0002438
2.8.3.20	0.0118594	0.00135726	0.00379258	0.000172617	0.00517777	0.00129201	0.00602179	0.000562151	0.00563303	0.000991287	0.00488606	0.000524519	9.148e-05	0.0002439
2.2.1.6	0.334926	0.0131256	0.265665	0.00913341	0.261269	0.0182928	0.275769	0.0240027	0.241481	0.013571	0.25828	0.0022229	9.156e-05	0.0002439
2.3.1.109	0.00295263	0.000511733	0.00229265	0.000336296	0.00557624	0.000334039	0.0028433	0.000983646	0.00167519	0.000174853	0.00389272	0.00108509	9.166e-05	0.000244
3.6.1.25	0.0198706	0.00164379	0.0151333	0.000532708	0.015784	0.000697722	0.0176479	0.00176422	0.0217619	0.00236422	0.0233214	0.00378465	9.168e-05	0.000244
2.4.1.8	0.00216794	0.000733673	0.00571076	0.000722157	0.00636897	0.0023205	0.00542975	0.00253427	0.00609074	0.000994743	0.0039886	0.000640372	9.185e-05	0.0002443
2.7.9.1	0.135481	0.00383976	0.151147	0.00437465	0.154567	0.00446681	0.15364	0.00620949	0.152701	0.00638456	0.165254	0.0052257	9.203e-05	0.0002443
2.1.1.179	0.00232994	0.00052595	0.00177813	0.000717143	0.0071219	0.0017038	0.00341476	0.00160105	0.00720115	0.00198955	0.00484105	0.000402457	9.205e-05	0.0002443
5.3.99.2	0.00408435	0.000639181	0.00451872	0.000552383	0.00297814	0.000457399	0.00318124	0.000638353	0.00311855	0.000344226	0.000744907	0.00019855	9.205e-05	0.0002443
3.5.1.3	0.0219767	0.00177122	0.0275241	0.00211497	0.0328232	0.00694633	0.0309875	0.00416074	0.0394353	0.00289228	0.0291523	0.00194377	9.24e-05	0.0002451
5.4.99.5	0.0429493	0.000846001	0.0466188	0.00201928	0.0530382	0.00584569	0.0533979	0.00219331	0.0560389	0.00331707	0.0521878	0.00219031	9.246e-05	0.0002451
3.4.24.56	0.00242304	0.000433831	0.00534636	0.000574244	0.00574344	0.00215651	0.00640988	0.00239182	0.00592071	0.00146341	0.00347767	0.000537992	9.317e-05	0.0002467
1.1.1.305	0.00648274	0.00130993	0.00442004	0.00023476	0.00283589	0.000576536	0.0021053	0.000904419	0.00324291	0.00087848	0.00248296	0.000224257	9.323e-05	0.0002467
2.1.2.13	0.00648274	0.00130993	0.00442004	0.00023476	0.00283589	0.000576536	0.0021053	0.000904419	0.00324291	0.00087848	0.00248296	0.000224257	9.323e-05	0.0002467
7.6.2.16	0.00882394	0.000669506	0.0145277	0.00127556	0.0155064	0.00213241	0.009807	0.0026448	0.00781898	0.00124096	0.0139736	0.000710814	9.334e-05	0.0002468
1.3.1.43	0.0118853	0.00116917	0.00840794	0.000937762	0.0100745	0.000714512	0.0104728	0.00145635	0.00641318	0.000892343	0.009592	0.00127678	9.405e-05	0.0002485
3.4.25.1	0.0209033	0.00156923	0.0192263	0.000808113	0.0180581	0.00315127	0.0251036	0.00356276	0.0207737	0.00221211	0.0410142	0.00170857	9.415e-05	0.0002487
1.14.11.36	0.000654769	0.000222504	0.000361374	7.87519e-05	0.000205745	0.000105017	6.31985e-05	5.56642e-05	0.000142405	0.000120395	0.000380732	0.000188609	9.436e-05	0.0002491
2.4.2.18	0.0474284	0.00142559	0.0513832	0.00347273	0.0494609	0.00142713	0.0548271	0.00262764	0.0534176	0.00213825	0.0534024	0.00147594	9.449e-05	0.0002492
2.7.7.60	0.0331992	0.00149153	0.0344965	0.000707206	0.0316267	0.00194389	0.0339558	0.00284709	0.0402125	0.00252625	0.042378	0.00141727	9.479e-05	0.0002499
2.3.1.22	0.000928309	0.000167353	0.00069444	0.000119129	0.000851027	9.91913e-05	0.00120639	0.000239596	0.00175938	0.000235572	0.000670414	0.000120896	9.487e-05	0.0002499
1.14.14.46	0.0192191	0.00117249	0.00983372	0.000538364	0.0160391	0.00285907	0.0133785	0.00102537	0.0139283	0.00259661	0.0179008	0.00100347	9.519e-05	0.0002506
1.97.1.9	0.0181306	0.0023783	0.024076	0.00149171	0.0199304	0.00223813	0.0291899	0.00551704	0.0300912	0.00271447	0.018558	0.000791675	9.525e-05	0.0002506
3.2.1.51	0.087009	0.00885984	0.110172	0.018848	0.124453	0.0217321	0.0816319	0.0169166	0.136657	0.0229044	0.0815414	0.00634809	9.536e-05	0.0002506
1.1.1.17	0.00326055	0.00066334	0.00394998	0.000782434	0.00479415	0.000901161	0.00326397	0.00110247	0.00707936	0.00117492	0.00515602	0.000614144	9.538e-05	0.0002506
1.14.99.46	0.0057375	0.000683923	0.00191801	0.000345308	0.0038432	0.00107304	0.00273091	0.000611474	0.00300362	0.00065246	0.00401231	0.00080514	9.542e-05	0.0002506
6.2.1.30	0.0745403	0.00375719	0.0767072	0.00135057	0.0692855	0.00490538	0.0628814	0.00772581	0.0556209	0.00890741	0.0581641	0.000998909	9.561e-05	0.000251
4.1.1.69	0.000508487	0.000134597	0.000132924	4.28202e-05	0.000121561	6.20739e-05	7.26895e-05	7.96127e-05	0.000572756	0.000305832	0.000192361	0.000128608	9.582e-05	0.0002513
1.1.1.87	0.00213123	0.000224998	0.000995454	0.000181468	0.00371136	0.00125343	0.00191503	0.000586101	0.00389479	0.000681876	0.00225744	0.000371337	9.609e-05	0.0002519
2.1.1.115	0.000151357	6.51306e-05	0.000157976	0.000177033	5.76181e-05	7.34024e-05	0	0	0	0	0	0	9.621e-05	0.0002519
2.1.1.140	0.000151357	6.51306e-05	0.000157976	0.000177033	5.76181e-05	7.34024e-05	0	0	0	0	0	0	9.621e-05	0.0002519
4.1.2.62	6.05025e-05	5.42103e-05	0.000110306	0.000105249	0.000587042	0.00014613	0.000171203	0.000104152	0.000262262	8.43126e-05	0.000258391	0.000126965	9.626e-05	0.0002519
2.8.3.26	0.00256788	0.000321522	0.000523371	0.000447854	0.000894754	0.000235655	0.00115012	0.000266875	0.00116775	0.000388701	0.000658268	0.000249219	9.645e-05	0.0002522
2.7.8.36	0.00872935	0.000667154	0.00781133	0.000543248	0.0101067	0.000961754	0.00953974	0.00185157	0.0129547	0.000787366	0.013808	0.00298436	9.654e-05	0.0002523
2.8.3.17	0.00324166	0.000517992	0.00122982	0.000282871	0.00130247	0.000585513	0.00137748	0.000322558	0.00300601	0.000535672	0.00116768	0.000349745	9.673e-05	0.0002526
2.3.1.209	0.000225604	0.000113667	0.000627435	0.000307652	0.000243697	7.04649e-05	0.00020205	3.99091e-05	0.00128017	0.00021141	0.000525379	0.000166904	9.68e-05	0.0002527
4.3.1.1	0.00921951	0.00122197	0.0112422	0.000325166	0.0162314	0.00243956	0.00912861	0.00141693	0.0140907	0.00371816	0.0131045	0.00258278	9.697e-05	0.0002528
3.6.1.29	0.00134732	0.000220017	0.000900714	0.000378706	0.000948346	0.000148424	0.00190833	0.000582085	0.00241887	0.000574567	0.0013647	0.000286982	9.697e-05	0.0002528
6.3.2.11	0.000193588	9.09059e-05	0.00113048	0.000560386	0.000602029	0.000209545	0.000863947	0.000308265	0.000298175	0.000144219	0.000731047	0.00015489	9.703e-05	0.0002528
5.1.3.1	0.0465445	0.00165573	0.0543577	0.00480479	0.0484208	0.0023554	0.0472142	0.00253429	0.0554109	0.00222252	0.0539685	0.0018753	9.738e-05	0.0002536
4.2.1.90	0.018442	0.000778439	0.0115448	0.000731683	0.0182675	0.00196843	0.0155598	0.00194679	0.0172825	0.000912161	0.0131362	0.00134339	9.764e-05	0.000254
3.2.1.202	0.0043938	0.000690364	0.00827343	0.00298191	0.011189	0.00491271	0.00388821	0.000530253	0.0098716	0.00577711	0.00382425	0.000913891	9.775e-05	0.000254
1.14.99.50	0.0297711	0.00212819	0.0207691	0.002249	0.0242829	0.00171325	0.0312995	0.00449854	0.0305375	0.00232153	0.0242767	0.00100913	9.777e-05	0.000254
2.7.1.198	0.000398858	0.00014109	0.00285176	0.000768685	0.000422747	0.000289106	0.00124892	0.000955064	0.000256228	0.000129461	0.00171023	0.000215028	9.784e-05	0.000254
2.4.1.180	0.000312633	0.000141711	0.000201642	8.6777e-05	0.000790881	0.000378664	0.000100381	0.000164346	1.39943e-05	2.32753e-05	0.000420991	0.000160113	9.784e-05	0.000254
4.2.3.153	0.00451893	0.000469812	0.00278513	0.000367468	0.00453836	0.000582482	0.00308011	0.000503942	0.00453506	0.000305445	0.00296519	0.000227674	9.81e-05	0.0002545
4.4.1.21	0.000435299	0.000145611	0.000473017	0.000103426	0.000671108	0.000228272	5.91027e-05	4.30939e-05	3.02125e-05	3.00183e-05	0.000586068	0.00021571	9.824e-05	0.0002547
6.3.1.9	5.13906e-05	4.30156e-05	0	0	6.07138e-06	1.48718e-05	0	0	0	0	0	0	9.831e-05	0.0002547
2.6.1.110	0.000288946	0.000112556	0	0	0.000272475	0.000176474	0.000108464	5.42479e-05	0.000124912	8.77683e-05	9.14501e-06	1.41741e-05	9.845e-05	0.0002549
2.8.1.16	0.00617978	0.00187771	0.00866737	0.00190792	0.010407	0.00223898	0.0125861	0.00465432	0.0139211	0.00156115	0.00672909	0.000486095	9.854e-05	0.000255
1.5.1.3	0.0243013	0.00171574	0.0325386	0.00223765	0.0284919	0.00347945	0.0259358	0.00165305	0.0322867	0.00214941	0.0267299	0.00129447	9.87e-05	0.0002552
3.1.1.93	0.00139911	0.000290698	0.000836475	0.000110622	0.0010407	0.000279228	0.00231409	0.000538054	0.00208723	0.00031798	0.00151236	0.000269356	9.874e-05	0.0002552
5.4.3.5	0.00264616	0.000348669	0.00533717	0.000160885	0.0053926	0.000555993	0.00462276	0.000624995	0.00615127	0.00126034	0.00697	0.00109223	9.887e-05	0.0002554
1.2.1.4	0.00123124	0.000521606	0.000663105	0.000132122	0.00162048	0.00108654	0.0002865	0.000173589	6.22857e-05	3.25243e-05	0.000346005	0.000135412	9.9e-05	0.0002554
2.1.1.183	0.000426718	8.01569e-05	4.5049e-05	3.94951e-05	0.000156742	0.000131481	4.53849e-05	2.91979e-05	7.61003e-05	6.14228e-05	0.000161604	5.13144e-05	9.9e-05	0.0002554
1.1.3.6	0.0562738	0.00309957	0.0552359	0.00292956	0.0641622	0.00197546	0.0595807	0.00784181	0.0645007	0.0021721	0.0914281	0.00195125	9.914e-05	0.0002556
2.4.99.19	0.000131122	8.92257e-05	0.000567361	0.000349701	0.000322981	7.9678e-05	4.32796e-05	5.16095e-05	1.42816e-05	2.41982e-05	1.53327e-05	1.7999e-05	9.942e-05	0.0002562
3.2.1.94	2.50486e-06	7.51457e-06	9.92081e-05	8.52652e-05	0	0	8.21784e-06	2.01295e-05	1.82096e-05	2.29571e-05	0.00012027	5.21052e-05	9.964e-05	0.0002566
2.4.1.336	0.00424684	0.000382932	0.00583986	0.00119146	0.00401437	0.000756452	0.00813611	0.00162534	0.00473901	0.000624924	0.00635763	0.000344834	9.989e-05	0.0002571
2.1.1.77	0.0952806	0.00356808	0.0939263	0.00205283	0.0873708	0.00233233	0.0922618	0.00414259	0.100194	0.00532059	0.0780226	0.00377872	9.996e-05	0.0002571
2.8.2.8	0.0034586	0.000613787	0.00204443	0.000293638	0.00196141	0.000274089	0.00335827	0.000954798	0.00516083	0.00104844	0.0033493	0.00044492	0.0001	0.0002571
2.1.1.182	0.0442469	0.00114753	0.0533828	0.00299952	0.048392	0.00450475	0.0506249	0.00131622	0.0547434	0.00290313	0.0546235	0.000838266	0.0001001	0.0002571
2.1.1.254	0.000245269	8.25738e-05	0.00114995	0.00021074	0.000213151	0.000145299	0.000804687	0.000431835	0.00121466	0.000217413	0.000226965	4.96947e-05	0.0001004	0.0002578
1.14.11.78	0.000359447	0.000190028	0.000116578	7.62354e-05	0.000157861	7.61447e-05	5.53972e-05	7.84513e-05	5.9812e-06	1.46509e-05	1.8435e-05	2.98799e-05	0.0001005	0.0002579
3.7.1.24	0.000763155	0.000259398	8.26912e-05	7.75618e-05	0.000165309	0.000197133	0.000225194	0.000108091	0.000130708	7.75626e-05	0.00041224	0.000128465	0.0001011	0.0002593
6.2.1.48	0.0427561	0.00148514	0.0264183	0.0032313	0.022487	0.00336811	0.0223835	0.0022678	0.0224534	0.00231364	0.0194789	0.000888293	0.0001014	0.0002598
3.2.1.114	0.000395864	0.000195082	7.81945e-05	5.29608e-05	0.000381115	0.000199336	0.000138356	9.40227e-05	1.56267e-05	1.59253e-05	0.000223079	6.38687e-05	0.0001018	0.0002607
2.4.1.255	0.0617587	0.0066956	0.0579939	0.00324528	0.0497974	0.00750099	0.0742394	0.0070165	0.0465677	0.0054701	0.0466632	0.00530926	0.0001021	0.0002613
3.6.1.1	0.0572271	0.00178278	0.0629457	0.00142942	0.0654048	0.0038162	0.06255	0.00326359	0.0633695	0.00220856	0.0693941	0.00267545	0.0001021	0.0002612
1.1.1.337	0.0200808	0.0019987	0.0136363	0.00100124	0.0144088	0.00094294	0.018638	0.00397559	0.0166167	0.00157164	0.00987868	0.000980423	0.0001029	0.000263
1.3.1.86	0.00787463	0.000750476	0.0068066	0.00249519	0.00961722	0.00193189	0.011934	0.00334688	0.0120457	0.00214803	0.027371	0.000958628	0.0001029	0.000263
3.4.24.15	0.00555074	0.000558776	0.0139715	0.00180783	0.00885135	0.002319	0.0104869	0.00160877	0.00922999	0.00097791	0.00963039	0.000798462	0.0001032	0.0002635
2.7.7.83	0.0192539	0.00119626	0.0180407	0.000249266	0.0270245	0.00414236	0.0162593	0.00212456	0.0210638	0.00433722	0.0140694	0.00114553	0.0001034	0.0002639
1.11.1.10	0.0699124	0.0032634	0.0399988	0.00237095	0.0515804	0.00666473	0.0516566	0.00400501	0.0536967	0.00322019	0.0568306	0.00352995	0.0001035	0.0002639
2.3.2.5	0.0232252	0.00126714	0.020431	0.00126404	0.0235073	0.00264196	0.018135	0.00246276	0.0235731	0.00138022	0.0182794	0.000714097	0.0001035	0.0002639
6.3.4.19	0.05023	0.00157001	0.0547379	0.000977871	0.0526093	0.0036424	0.0541796	0.00306489	0.0598937	0.00336113	0.0623321	0.00306762	0.0001037	0.0002641
5.5.1.29	0.000662853	0.000261104	0.000489432	0.000473227	0.00070921	0.000291924	3.65881e-05	4.46087e-05	0.000223739	0.000109891	0.000352352	0.000101409	0.0001038	0.0002643
1.1.99.31	0.00545549	0.00111045	0.0047193	0.000894875	0.00411136	0.000909661	0.00258069	0.00110757	0.000959869	0.000287455	0.00396664	0.000315556	0.0001041	0.0002648
5.1.3.40	0.000945918	0.000264052	0.00116418	0.000161304	0.0016637	0.000581081	0.000386452	0.000136524	0.000658711	0.000266729	0.000801587	0.000114026	0.0001041	0.0002648
2.1.1.297	0.0682455	0.00191996	0.0721706	0.00196063	0.0740201	0.00427873	0.0620123	0.00521054	0.066542	0.00296422	0.0791632	0.00439922	0.0001045	0.0002655
1.3.1.102	0.000482238	0.000156674	4.41501e-05	4.04978e-05	0.000226745	0.000147587	0.00034029	7.27319e-05	0.000551554	0.000125404	0.000127545	8.16357e-05	0.0001046	0.0002656
3.5.4.22	0.00823472	0.000714739	0.012024	0.000265895	0.00885144	0.000933342	0.00880874	0.00103925	0.00620391	0.000705273	0.00669593	0.000833732	0.0001048	0.000266
2.7.8.12	0.0115922	0.000822064	0.0117918	0.00191076	0.0126864	0.00123403	0.0122375	0.00145893	0.0198051	0.00143914	0.033847	0.00284247	0.0001049	0.000266
3.4.21.83	0.0368206	0.00171748	0.0565919	0.000411648	0.0469453	0.00242297	0.0377805	0.00528252	0.0338902	0.00312029	0.0401917	0.000697147	0.0001051	0.0002661
2.6.1.52	0.0440526	0.00197736	0.0529667	0.000687129	0.0523881	0.00384848	0.0520958	0.00451337	0.0550521	0.00237096	0.0584393	0.00204096	0.0001052	0.0002661
3.5.4.1	0.0292205	0.00189233	0.0285328	0.00174918	0.0300087	0.0017098	0.0315535	0.00251813	0.0235489	0.0023578	0.0225731	0.000998902	0.0001052	0.0002661
3.5.4.21	0.0292205	0.00189233	0.0285328	0.00174918	0.0300087	0.0017098	0.0315535	0.00251813	0.0235489	0.0023578	0.0225731	0.000998902	0.0001052	0.0002661
2.4.1.391	0	0	0.000156746	9.86511e-05	0.000246984	0.00023426	3.98717e-06	9.76654e-06	0.000352105	0.000248922	0.000185099	0.00014221	0.0001052	0.0002661
1.3.99.38	0.0342897	0.00179154	0.0204742	0.000560797	0.0268673	0.00380421	0.0344517	0.00331057	0.0371706	0.0044562	0.0392117	0.0014416	0.0001055	0.0002666
2.4.1.293	0.000866937	0.000163347	0.000407325	3.60439e-05	0.000375478	0.000246792	0.000648358	0.000235214	0.00117078	0.000103574	0.00113236	0.000225915	0.0001055	0.0002666
2.4.1.46	0.00195341	0.000321197	0.00233458	0.000173864	0.00462216	0.000796359	0.00210908	0.000625824	0.00233144	0.000201025	0.00290523	0.000293676	0.0001058	0.0002671
2.8.3.19	0.0871403	0.00548785	0.052369	0.00394475	0.0489192	0.0106419	0.0519339	0.00303063	0.051012	0.00665458	0.039795	0.00187442	0.0001059	0.0002672
2.7.1.170	0.017958	0.000724826	0.0267943	0.00236901	0.0201026	0.00268906	0.0245281	0.00398929	0.0204515	0.00195619	0.0170715	0.00165653	0.000106	0.0002672
5.3.1.34	0.00027501	0.000100377	0.000391578	0.000199004	0.000353057	0.000137649	3.90061e-05	4.45691e-05	6.73519e-05	5.868e-05	0.000165033	8.37691e-05	0.000106	0.0002672
3.2.2.2	0.00944703	0.000586759	0.00931621	0.00100493	0.0104888	0.000972201	0.00953461	0.00124719	0.00687308	0.000706209	0.00626973	0.000121502	0.0001061	0.0002672
4.1.2.10	0.00324001	0.000382566	0.00133697	0.000110889	0.00214135	0.000670986	0.00233356	0.000424693	0.00274945	0.000234888	0.00173343	0.000185154	0.0001064	0.0002678
1.1.1.159	0.0239879	0.00204019	0.0128118	0.0010109	0.0191547	0.00191519	0.0176228	0.00320168	0.0187946	0.00292925	0.0222536	0.00103051	0.0001065	0.0002678
1.2.4.4	0.120612	0.00527078	0.137	0.00488204	0.131813	0.00407623	0.113576	0.0105651	0.103096	0.00780209	0.117201	0.00255063	0.0001069	0.0002685
3.2.1.25	0.0292779	0.0024463	0.027006	0.00168523	0.0411909	0.00359053	0.0322682	0.00760623	0.0445698	0.000607474	0.032601	0.00191505	0.0001069	0.0002685
4.1.2.19	0.00315787	0.00072709	0.00125942	0.000224238	0.0032287	0.000379532	0.00201009	0.00077911	0.00391949	0.000611448	0.00154019	0.000238144	0.0001071	0.0002685
4.4.1.36	0.000798867	0.00014417	0.000249871	0.000154836	0.000616713	0.000179831	0.00129459	0.000329154	0.000927069	0.000261541	0.00119534	9.96628e-05	0.0001072	0.0002685
2.4.99.14	0.0409968	0.00140632	0.0492298	0.00244061	0.0398853	0.00499599	0.0448061	0.00218117	0.0514172	0.0063001	0.0372772	0.00263247	0.0001073	0.0002685
2.4.99.13	0.0409968	0.00140632	0.0492298	0.00244061	0.0398853	0.00499599	0.0448061	0.00218117	0.0514172	0.0063001	0.0372772	0.00263247	0.0001073	0.0002685
2.4.99.12	0.0409968	0.00140632	0.0492298	0.00244061	0.0398853	0.00499599	0.0448061	0.00218117	0.0514172	0.0063001	0.0372772	0.00263247	0.0001073	0.0002685
2.4.99.15	0.0409968	0.00140632	0.0492298	0.00244061	0.0398853	0.00499599	0.0448061	0.00218117	0.0514172	0.0063001	0.0372772	0.00263247	0.0001073	0.0002685
3.4.21.70	0.000380912	0.000110927	0	0	0.000128302	0.00013908	0.000520511	0.000244875	0.000584755	0.000193926	0.000150092	7.38904e-05	0.0001073	0.0002685
1.1.1.284	0.0672624	0.00528926	0.0446621	0.00144813	0.0520766	0.00843569	0.05336	0.0100389	0.0399228	0.00477127	0.0444984	0.00176285	0.0001076	0.0002692
2.3.1.276	0.0152898	0.00130968	0.0165055	0.000789926	0.022831	0.00429376	0.0134363	0.0019984	0.0174783	0.00352302	0.011324	0.000814312	0.000108	0.0002698
2.4.2.22	0.00934563	0.000970096	0.0130812	0.00143905	0.0131418	0.00119923	0.0107295	0.00125553	0.0100173	0.000578004	0.0141939	0.00267163	0.0001082	0.0002704
1.13.11.3	0.0399618	0.00152181	0.0218561	0.00285811	0.0253861	0.00305705	0.0225306	0.00219948	0.0208185	0.0035538	0.0197113	0.00105503	0.0001087	0.0002713
1.14.13.8	0.0192177	0.00194494	0.0101121	0.000536669	0.0192535	0.00189918	0.0237343	0.00301978	0.0184832	0.00184245	0.0386097	0.00189919	0.0001088	0.0002715
3.5.3.12	0.025068	0.00143011	0.0277962	0.00287659	0.0311165	0.00287615	0.0216789	0.0026433	0.0280116	0.00172784	0.0292589	0.00130003	0.0001089	0.0002716
1.3.3.8	0.000171808	5.07591e-05	2.22756e-05	3.02436e-05	0.00013464	8.83686e-05	0.000409627	0.000165827	0.000838719	0.000130825	0.00023278	0.00010082	0.000109	0.0002716
2.7.6.2	0.0134217	0.00131651	0.0171523	0.00220512	0.0189586	0.00211486	0.0125512	0.00167703	0.0173746	0.00138733	0.0135039	0.00138162	0.0001091	0.0002717
3.5.1.59	0.00066174	0.000279431	0.000246236	0.000125772	0.000112106	0.000151046	0.000189206	0.000153995	2.29806e-05	3.69822e-05	5.81823e-05	4.1325e-05	0.0001095	0.0002726
2.1.1.331	0.00449284	0.000553915	0.00613804	0.000102479	0.00496532	0.000423912	0.00459701	0.000792057	0.00682247	0.000878199	0.00560091	0.000557626	0.0001096	0.0002726
4.4.1.32	0.000776263	0.00024574	0.000129029	1.68196e-05	0.000361962	0.000194856	0.00402385	0.00116479	0.000554659	0.000192862	0.000514666	0.000228431	0.0001096	0.0002726
1.1.3.10	0.000525833	0.00011001	0	0	3.07298e-05	5.19956e-05	7.62182e-06	1.86696e-05	3.47877e-05	4.66273e-05	5.89845e-06	1.44482e-05	0.0001101	0.0002735
3.5.3.26	0.00498216	0.000783108	0.00442819	0.000702148	0.00516342	0.000512802	0.0037522	0.00122478	0.00192624	0.000519518	0.00311928	0.000373591	0.0001104	0.0002741
3.8.1.5	0.0466189	0.00239087	0.0500207	0.00266503	0.0452694	0.00708692	0.0620162	0.00942882	0.0532057	0.0055408	0.0620338	0.00251861	0.0001105	0.0002741
1.1.1.239	0.00216488	0.000289191	0.00310987	0.000851267	0.00370046	0.000611833	0.00187564	0.000225553	0.00160764	0.000337916	0.0021407	0.000324202	0.0001105	0.0002741
4.1.1.39	0.016293	0.00123781	0.0391858	0.00292595	0.0350504	0.00372011	0.0331176	0.00730208	0.028173	0.0045619	0.0318529	0.00221952	0.0001115	0.0002762
3.1.4.52	0.0683211	0.00562347	0.0570047	0.00290625	0.0519334	0.00696326	0.0648421	0.00658312	0.0541249	0.00200389	0.0514716	0.00223674	0.0001116	0.0002762
2.8.4.5	0.0388517	0.00247298	0.0394823	0.00205763	0.0430411	0.00336017	0.0404397	0.00471787	0.0498432	0.00555511	0.0334203	0.00170526	0.0001116	0.0002762
3.5.99.5	0.00124539	0.000235345	0.0021502	0.000541164	0.00255098	0.00110879	0.00248465	0.000378847	0.00139504	0.00022627	0.0011732	0.000255991	0.0001116	0.0002762
2.3.3.10	0.0248405	0.00154045	0.0244941	0.00136946	0.0248234	0.00151529	0.0328732	0.0012952	0.0294284	0.00143334	0.0237029	0.000513778	0.0001119	0.0002762
1.12.2.1	0.00334179	0.000683993	0.0024728	0.000378632	0.00444285	0.00183172	0.00962209	0.00432281	0.0107845	0.00234494	0.00550758	0.000897505	0.0001119	0.0002762
5.3.1.12	0.0180216	0.00197678	0.0158272	0.00322599	0.0166019	0.00100317	0.0140086	0.00183086	0.0242407	0.00156724	0.0151274	0.000893931	0.0001121	0.0002762
1.3.7.2	1.8953e-05	2.682e-05	0.000153791	5.61353e-05	7.0079e-06	1.71658e-05	0.000836339	0.000664998	0.000106152	6.17531e-05	6.00903e-05	6.94458e-05	0.0001121	0.0002762
1.14.13.182	0.000387514	0.000147004	7.74906e-05	5.12603e-05	0.000215183	5.69383e-05	5.87989e-05	7.40548e-05	1.89026e-05	3.83661e-05	0.000183655	0.000118016	0.0001122	0.0002762
2.1.1.141	0.000221781	7.91528e-05	0	0	1.47975e-05	2.29243e-05	4.61007e-06	1.12923e-05	5.38781e-06	8.44837e-06	5.16258e-05	4.90911e-05	0.0001122	0.0002762
2.3.1.65	0.000140684	6.12856e-05	5.30646e-05	9.19106e-05	6.63712e-05	9.29627e-05	0	0	0	0	0	0	0.0001122	0.0002762
2.5.1.10	0.063151	0.00175735	0.0598271	0.0050602	0.0657179	0.00431742	0.070497	0.00261243	0.0750051	0.00127658	0.069575	0.00153855	0.0001124	0.0002762
2.5.1.1	0.0632017	0.00173849	0.0598271	0.0050602	0.0657179	0.00431742	0.070497	0.00261243	0.0750051	0.00127658	0.069575	0.00153855	0.0001124	0.0002762
2.1.2.11	0.0541206	0.00138748	0.060431	0.00236872	0.0550693	0.00208071	0.0519596	0.00199552	0.051051	0.00151196	0.0569212	0.00065843	0.0001124	0.0002762
2.7.1.58	0.00547408	0.000688227	0.00589965	0.000403	0.00603571	0.000783719	0.00501489	0.000679889	0.00311221	0.000775074	0.0034601	0.000352375	0.0001124	0.0002762
1.14.13.25	3.14856e-05	4.3771e-05	0	0	0.000174956	0.00011515	0.000161396	9.79472e-05	0.000153459	7.46147e-05	0.000638823	0.000149421	0.0001124	0.0002762
3.4.17.14	0.0197957	0.0014478	0.023001	0.00102544	0.0224838	0.00182691	0.0231827	0.00262723	0.0261536	0.00317442	0.0170404	0.000459397	0.0001128	0.0002768
3.4.21.100	0.000105446	4.31606e-05	2.20013e-05	3.81074e-05	4.96023e-05	2.90219e-05	4.2876e-06	4.86713e-06	1.44916e-06	3.5497e-06	3.22104e-05	5.24884e-05	0.0001128	0.0002768
2.1.1.374	0.00484999	0.000468529	0.00292728	0.000445816	0.00268695	0.000774605	0.0024769	0.000256321	0.00193968	0.00031995	0.00260972	0.000156372	0.0001129	0.0002769
2.7.1.56	0.00763177	0.000713378	0.00429185	0.00208772	0.00814144	0.000948797	0.0104938	0.00381869	0.0124439	0.000448019	0.0191041	0.00138431	0.000113	0.000277
3.1.6.14	0.0335396	0.00142118	0.0256243	0.00472054	0.0285538	0.00214134	0.0293194	0.00316685	0.0348108	0.00189389	0.029806	0.00158641	0.0001131	0.000277
3.4.21.4	0.00292428	0.000256742	0.00346807	0.000139672	0.00402741	0.000466948	0.00235949	0.000574926	0.00420487	0.00186515	0.00713454	0.000546102	0.0001132	0.0002772
2.1.1.192	0.0645051	0.0019951	0.0705062	0.00287609	0.0717867	0.00194771	0.0639306	0.00307005	0.0666803	0.00182415	0.0699593	0.0017172	0.0001133	0.0002772
3.4.19.15	0.00224705	0.000369839	0.00197926	0.000311486	0.00119197	0.000182474	0.00129727	0.000351164	0.00177745	0.000319915	0.00110068	0.000342141	0.0001133	0.0002772
1.10.3.4	0.000119501	7.23749e-05	8.52805e-05	2.75189e-05	0.000153404	0.000110083	0	0	0	0	4.16087e-05	6.4314e-05	0.0001134	0.0002773
3.1.5.1	0.0510808	0.00258968	0.0592919	0.00215178	0.0577609	0.00262752	0.0562058	0.00196671	0.0511774	0.00137741	0.0556501	0.00126246	0.000114	0.0002786
2.7.1.184	0.0121483	0.000819003	0.0166467	0.000720174	0.017892	0.00289522	0.0155543	0.00317254	0.0122498	0.000890487	0.0217681	0.00109117	0.0001144	0.0002792
1.13.12.22	0.000859384	0.000118608	4.62903e-05	4.08413e-05	0.000286088	0.00021239	0.000172907	0.00010299	0.00014787	6.7344e-05	6.41943e-05	5.64401e-05	0.0001144	0.0002792
1.8.4.8	0.0335031	0.00245167	0.0266486	0.000190716	0.0320323	0.00539763	0.0232399	0.00430622	0.0190315	0.00094956	0.0347417	0.00319147	0.0001146	0.0002792
1.8.4.10	0.0335031	0.00245167	0.0266486	0.000190716	0.0320323	0.00539763	0.0232399	0.00430622	0.0190315	0.00094956	0.0347417	0.00319147	0.0001146	0.0002792
1.1.1.315	0.00162518	0.000316394	0.00136868	0.000174509	0.00179528	0.000237885	0.00248872	0.000471444	0.00285197	0.000770381	0.00334712	0.000415624	0.0001152	0.0002806
6.3.5.6	0.26705	0.00778187	0.25327	0.00175526	0.246073	0.00892318	0.245382	0.0105659	0.203278	0.00770311	0.251688	0.00275121	0.0001153	0.0002807
3.4.21.1	0.000714858	0.00021573	0.000252921	0.000171421	0.00125853	0.00029883	0.000372962	0.000181817	0.000765086	0.000399702	0.000201755	9.40122e-05	0.0001154	0.0002807
3.1.3.79	0.000938436	0.000344682	0.000247408	0.000181744	0.00128627	0.000454056	0.000219052	0.000231621	0.000175406	7.20971e-05	0.000743735	0.000225959	0.0001156	0.0002808
2.5.1.9	0.0315017	0.00160879	0.0392922	0.00178611	0.0319299	0.00261126	0.0396951	0.00237688	0.0376729	0.00188307	0.0387633	0.00130046	0.0001157	0.0002808
2.3.1.210	0.00382202	0.000416282	0.00267473	0.000306788	0.00582332	0.000913778	0.00433116	0.00136269	0.00740322	0.0012994	0.004931	0.000378052	0.0001157	0.0002808
1.7.3.1	0.000398497	0.000111494	0.00016945	1.06835e-05	9.94785e-05	0.000101414	4.51723e-05	7.49347e-05	5.04055e-05	9.44958e-05	5.65615e-06	1.38547e-05	0.0001157	0.0002808
2.3.2.33	4.63679e-05	3.8133e-05	0.000241306	0.000310112	0.000330514	0.000223472	0	0	0	0	3.23247e-05	5.18451e-05	0.0001157	0.0002808
2.4.2.6	0.000187136	7.16895e-05	0.000126839	8.51689e-05	0.000771874	0.000450215	0.000134221	8.47128e-05	0.000501859	9.94963e-05	0.000198065	3.68104e-05	0.0001163	0.0002821
2.3.2.21	5.1242e-05	4.04049e-05	0	0	6.32032e-05	6.45086e-05	0	0	4.19872e-06	1.02847e-05	0.000282982	8.29547e-05	0.0001164	0.0002822
5.1.3.8	0.00373581	0.000894245	0.0042928	0.000968551	0.00633024	0.000821271	0.00667797	0.00239745	0.00878393	0.000728248	0.00796878	0.000524597	0.0001166	0.0002825
4.2.99.20	0.0162845	0.00151806	0.0159713	0.00127557	0.0182376	0.00169629	0.0164486	0.00310979	0.0246297	0.00194126	0.0200942	0.00104169	0.0001173	0.0002839
2.1.1.38	0.000924191	0.000187822	0.000203898	9.21969e-05	0.00022707	0.000156737	5.95124e-05	8.40805e-05	0.000172578	8.41962e-05	7.43741e-05	4.50927e-05	0.0001177	0.0002847
1.14.14.108	0.000433988	0.000199921	0.000557867	7.48337e-05	0.000104441	7.42539e-05	0.000111745	7.49448e-05	0.0001253	7.2688e-05	0.00017633	2.81796e-05	0.0001181	0.0002855
1.8.1.14	0.00468915	0.000681933	0.00281892	0.00147176	0.00510759	0.000772276	0.00633193	0.00233237	0.00826468	0.000636146	0.0111381	0.000797353	0.0001184	0.0002857
6.2.1.75	0.000885395	0.000183256	0.000999333	0.000226583	0.000361279	0.000296385	0.000295048	0.000198207	0.000125595	0.000114292	0.000610835	0.000146739	0.0001184	0.0002857
2.1.1.243	3.67839e-06	1.10352e-05	0	0	0.000163489	0.000138761	2.74633e-05	6.72712e-05	0	0	0	0	0.0001184	0.0002857
3.1.2.30	0.000975057	0.000336494	0.00244477	0.000486604	0.00229069	0.000485066	0.00162744	0.000817633	0.000490584	0.000202755	0.00125869	0.00030396	0.0001185	0.0002857
5.1.3.33	0.00137294	0.000322935	0.000572396	0.000110678	0.000569783	0.000265289	0.000551755	0.000164946	0.00097561	0.000155747	0.000598807	0.000146663	0.0001185	0.0002857
2.7.11.25	0.000611694	0.000162447	0.000152839	0.0001196	0.000747525	0.000489661	0.000443636	0.000164421	0.000286059	0.000105673	2.42233e-05	3.81676e-05	0.0001185	0.0002857
1.1.1.288	0.00145632	0.000238315	0.000474091	0.000238119	0.00125447	0.000461835	0.00210782	0.000448576	0.00242791	0.000545737	0.00109581	0.00026328	0.0001188	0.0002861
1.2.1.70	0.0479238	0.00147223	0.053402	0.00130468	0.0495622	0.00270109	0.0546705	0.00266217	0.0500649	0.000813878	0.0535938	0.000582858	0.0001189	0.0002861
3.1.2.29	0.0176623	0.000936936	0.0179455	0.0016604	0.0133372	0.00103217	0.0209421	0.00367317	0.0191636	0.000724123	0.022866	0.00137136	0.000119	0.0002863
5.1.1.20	0.042332	0.00112288	0.0425902	0.00297501	0.0416058	0.00120408	0.0464286	0.00509806	0.050829	0.00287924	0.0343062	0.00113744	0.0001192	0.0002866
2.4.1.182	0.033259	0.00199274	0.0407174	0.00201675	0.0349559	0.00372774	0.0356648	0.0027689	0.0402713	0.00477956	0.0267205	0.00150733	0.0001193	0.0002866
1.14.15.30	0.0230403	0.00133674	0.00997787	0.00159944	0.0122945	0.00288339	0.0126159	0.00254318	0.0111971	0.00200887	0.0141922	0.000609498	0.0001194	0.0002868
3.1.13.1	0.0772863	0.00172396	0.0852921	0.00234347	0.0855547	0.00626538	0.0910736	0.00375833	0.0813991	0.00380765	0.0757015	0.003264	0.0001198	0.0002875
3.2.1.152	0.000872815	0.000222351	0.00361049	0.000344331	0.00165592	0.000918554	0.000837549	0.000324005	0.00426897	0.00128245	0.0011332	0.000225335	0.0001199	0.0002876
1.14.99.62	0.00370128	0.000717106	0.00229599	0.000887427	0.00370468	0.000391795	0.00503582	0.000883768	0.0031746	0.000468983	0.00507879	0.00016762	0.0001202	0.0002883
2.7.1.30	0.0726443	0.00247843	0.0719241	0.00112127	0.0830608	0.00355735	0.0812022	0.00415357	0.0829986	0.00229601	0.084553	0.000768901	0.0001205	0.0002886
6.1.1.16	0.0938054	0.00137961	0.0989274	0.001581	0.0993661	0.00395176	0.105696	0.00378807	0.103999	0.00620987	0.104358	0.002145	0.0001207	0.000289
1.8.99.5	0.0180614	0.00265564	0.0354309	0.000319905	0.0261384	0.00361902	0.0283958	0.00761369	0.0359031	0.00420254	0.0256185	0.00231904	0.0001209	0.0002892
1.3.1.64	0.00439447	0.000577135	0.0019022	0.000134962	0.0029915	0.000620274	0.00242259	0.000420659	0.00284917	0.000320307	0.00254948	0.000254189	0.0001209	0.0002892
1.14.14.137	0.000457061	0.000123737	0.000237853	0.000157269	0.000225904	9.77962e-05	0.000142316	0.000114439	1.99416e-05	1.01519e-05	0.000184062	6.03157e-05	0.0001212	0.0002897
1.17.99.11	0.00443966	0.000332017	0.00539761	0.000305643	0.00239372	0.000964939	0.00195519	0.000485098	0.00177416	0.000673913	0.00183921	0.000442171	0.0001213	0.0002897
6.5.1.8	0.0514464	0.0029459	0.0632616	0.00127097	0.0541507	0.0043876	0.0494013	0.0043843	0.0453984	0.00375899	0.0373084	0.0018273	0.0001214	0.0002898
3.6.1.76	1.18182e-05	2.21455e-05	2.98818e-05	2.80364e-05	0.000252423	0.000224554	0	0	0	0	0	0	0.0001214	0.0002898
3.1.11.2	0.059903	0.00209625	0.0713896	0.00426522	0.0681708	0.0059675	0.0714799	0.00691659	0.0694865	0.002487	0.0835094	0.00109079	0.0001218	0.0002906
2.3.1.245	0.00469827	0.000547468	0.00534238	0.00103989	0.00326275	0.000727715	0.0041834	0.00140386	0.00255758	0.000652758	0.00165173	0.000319804	0.000122	0.0002908
2.3.1.194	0.000216866	0.000119056	1.47275e-05	2.55088e-05	8.42759e-05	8.14212e-05	0	0	7.77756e-06	1.36482e-05	3.13998e-05	5.20011e-05	0.000122	0.0002908
3.4.24.75	0.000498489	0.000158259	4.45721e-05	8.6561e-06	0.000443363	0.000231968	0.000738915	0.000192186	9.31851e-05	5.55278e-05	0.000328182	0.000132466	0.0001221	0.0002908
2.1.1.199	0.0484131	0.0011011	0.0567047	0.00101407	0.0545202	0.00314168	0.0532823	0.00248465	0.0582932	0.00286656	0.0571821	0.00167243	0.0001225	0.0002916
2.1.1.148	0.0134439	0.000925836	0.0183037	0.00283933	0.01781	0.00418403	0.0195606	0.00153431	0.0162502	0.00310425	0.023699	0.000598504	0.0001226	0.0002916
2.4.1.337	0.0352848	0.00220044	0.0227557	0.000710164	0.0363835	0.00117218	0.0262327	0.0043743	0.0361546	0.00523084	0.0261908	0.00101337	0.0001227	0.0002916
2.4.2.8	0.0553629	0.00218678	0.0633724	0.00201604	0.0555481	0.00180715	0.0498924	0.00478588	0.0590967	0.00315248	0.0619299	0.00236668	0.0001228	0.0002917
3.5.4.19	0.0329097	0.00125069	0.0380815	0.000286277	0.0368804	0.00259963	0.0371311	0.00382441	0.0388334	0.0011544	0.0416927	0.00113853	0.0001228	0.0002917
1.13.11.5	0.018336	0.000956913	0.0228579	0.00213499	0.0251401	0.00156685	0.0188128	0.00433252	0.012511	0.00139317	0.0179632	0.00128212	0.0001229	0.0002917
4.1.3.42	0.0196359	0.00184346	0.0271771	0.00102984	0.0243533	0.00081559	0.0224488	0.00312199	0.0229154	0.00097393	0.0181224	0.000889083	0.0001232	0.0002919
4.1.1.2	0.00150415	0.000365457	0.000499891	0.000292052	0.000924082	0.000391622	0.000700585	0.000108521	0.00108713	0.000116775	0.00158189	0.000322929	0.0001232	0.0002919
1.5.7.2	3.44208e-05	2.69958e-05	0.000109622	0.000114329	0.000597384	0.000473663	1.16935e-05	2.86431e-05	0.000149421	7.87984e-05	9.62044e-06	1.14154e-05	0.0001233	0.0002919
1.4.1.3	0.0751874	0.00215102	0.0711684	0.00466547	0.0655513	0.0046441	0.0702588	0.00516313	0.0606963	0.00662954	0.0570639	0.00267766	0.0001234	0.0002919
2.7.3.13	0.000707741	0.000282912	5.37397e-05	1.88946e-05	0.000563731	0.000263966	0.000637066	0.000481199	0.000177641	9.45662e-05	9.55902e-05	6.41575e-05	0.0001234	0.0002919
2.1.1.295	0.013474	0.000879458	0.0154181	0.00168151	0.0109549	0.00105855	0.0103555	0.00166273	0.00999538	0.000818636	0.00954165	0.000653946	0.0001235	0.0002919
1.17.4.4	0.000899427	0.00023735	0.00100493	0.000111821	0.00183685	0.000283093	0.000403307	8.32446e-05	0.000865933	0.000213183	0.000833877	0.000190449	0.0001235	0.0002919
1.1.1.48	0.00379069	0.000322825	0.00455718	0.00080004	0.00397633	0.000818059	0.00329555	0.00148834	0.0014386	0.000337216	0.00241566	0.000265746	0.0001236	0.0002921
6.3.2.5	0.0578588	0.00148081	0.0626449	0.00101261	0.0604677	0.0023763	0.0632944	0.00362463	0.0606655	0.00209019	0.0655367	0.000761347	0.0001245	0.0002938
1.10.3.3	0.00650759	0.000768099	0.00263024	0.000251953	0.00368808	0.00122545	0.00305584	0.000804953	0.00208713	0.000413343	0.00259576	0.00116877	0.0001245	0.0002938
2.7.1.191	0.0143711	0.00117094	0.0150476	0.00274827	0.0117264	0.000894019	0.00977031	0.00137978	0.0140472	0.00150643	0.0115982	0.00116844	0.0001246	0.0002938
2.1.1.100	0.013449	0.000776534	0.00756559	0.000263905	0.0114525	0.00117517	0.00725118	0.0019291	0.0119414	0.003439	0.00879304	0.000702714	0.0001246	0.0002938
2.2.1.5	0.0392582	0.00316936	0.030478	0.00188162	0.0359017	0.00519985	0.0451681	0.00608656	0.0420961	0.0048432	0.0771211	0.00415628	0.0001247	0.0002938
4.1.1.71	0.0392582	0.00316936	0.030478	0.00188162	0.0359017	0.00519985	0.0451681	0.00608656	0.0420961	0.0048432	0.0771211	0.00415628	0.0001247	0.0002938
6.1.1.20	0.161754	0.00278255	0.177514	0.00213445	0.174741	0.00902324	0.170585	0.00426987	0.161067	0.0044087	0.172829	0.00146337	0.0001252	0.0002945
1.1.1.385	0.0126987	0.000965095	0.0104316	0.00102771	0.00976218	0.00177977	0.00737102	0.00247074	0.00734278	0.000759937	0.00861856	0.000557924	0.0001252	0.0002945
2.1.1.190	0.0455354	0.00188598	0.0556182	0.000705493	0.0581017	0.00367767	0.0542705	0.00318101	0.0579411	0.00252126	0.0580775	0.00101529	0.0001254	0.0002945
3.7.1.2	0.0241989	0.00109954	0.0309094	0.00355876	0.028456	0.0041565	0.022886	0.00424431	0.0165789	0.00203741	0.0209232	0.000847578	0.0001254	0.0002945
2.1.1.90	0.00101724	0.000281607	0.0014596	0.000248992	0.00311329	0.00139764	0.000756786	0.000388826	0.00192088	0.0004087	0.00128445	0.000326027	0.0001254	0.0002945
2.7.7.108	0.0405343	0.00323448	0.0465405	0.00836061	0.0626749	0.0109841	0.0557296	0.00687759	0.0647389	0.00317539	0.056741	0.00467947	0.0001256	0.0002949
1.1.1.412	0.0197242	0.00130071	0.0151446	0.000433169	0.0199814	0.00122087	0.0208617	0.00292193	0.0262526	0.00162393	0.022113	0.000698273	0.0001261	0.0002958
4.2.3.3	0.00833163	0.00141176	0.0040834	0.000690494	0.0091826	0.000928916	0.00587673	0.00127973	0.00852107	0.000936687	0.00598337	0.000469174	0.0001268	0.0002972
1.1.3.29	0.00115324	0.000234175	0.000621617	0.000205193	0.000711679	0.000140447	0.000507043	0.00020862	0.000633974	0.000151946	0.0011013	0.000201589	0.0001268	0.0002972
2.3.1.80	0.00133002	0.000254045	0.000848466	0.000324675	0.00114211	0.000394078	0.000887904	0.000373407	0.00213623	0.000524743	0.000497333	0.000108912	0.0001271	0.0002976
4.1.3.39	0.00775179	0.000858177	0.00648013	0.00118869	0.0083957	0.000827058	0.0054962	0.00128511	0.00983054	0.00140115	0.0102821	0.0015509	0.0001273	0.0002979
3.4.24.77	2.19311e-06	6.57934e-06	0	0	6.22177e-05	6.84351e-05	0	0	0.000222099	0.000179037	2.76017e-05	2.72873e-05	0.0001275	0.0002982
4.1.1.64	0.00337803	0.00064825	0.0029017	0.000139773	0.00199774	0.000772774	0.00305831	0.00106165	0.00161104	0.00033853	0.00115675	0.000210236	0.0001277	0.0002985
1.13.11.82	0.00180251	0.000466992	0.00303852	0.000739876	0.00191041	0.000541874	0.00372206	0.000861065	0.00234155	0.000547481	0.00428022	0.0011122	0.0001279	0.0002988
1.2.7.6	0.00122107	0.000290568	0.00120119	0.000140523	0.00200748	0.000994218	0.000780397	0.000353857	0.00275499	0.00125266	0.000633104	7.26482e-05	0.0001281	0.000299
4.1.1.36	0.0582614	0.00145661	0.0635314	0.00166208	0.0613145	0.00277145	0.0636214	0.00357119	0.0616678	0.0022283	0.0659538	0.000701311	0.0001282	0.000299
3.5.4.44	0.0119405	0.00100706	0.00987606	0.00102127	0.00951464	0.0010627	0.0128025	0.00371137	0.00916379	0.0007239	0.00801201	0.000503779	0.0001282	0.000299
3.4.17.25	0.00339405	0.000376338	0.00260481	0.00056136	0.00212289	0.000558846	0.00247072	0.000639057	0.00104181	0.000228103	0.00260928	0.000355749	0.0001283	0.0002991
3.1.2.28	0.0179377	0.000704971	0.0160641	0.000628966	0.0190004	0.00103461	0.01685	0.00209049	0.0166428	0.00102357	0.0226969	0.00097319	0.0001284	0.0002992
5.4.99.25	0.0447195	0.00151064	0.0533008	0.000238255	0.0503511	0.00455465	0.0498032	0.00231154	0.0529017	0.00182232	0.0504457	0.00133918	0.0001285	0.0002992
1.3.99.5	0.00917247	0.00104449	0.00646003	0.000715376	0.00612696	0.00103436	0.0078885	0.000841872	0.00597352	0.00125552	0.00767714	0.000703631	0.0001285	0.0002992
2.5.1.56	0.00783445	0.000691775	0.00805079	0.00146401	0.00958526	0.00113867	0.00653391	0.00162827	0.00509753	0.00107345	0.00555037	0.000782319	0.0001286	0.0002993
2.3.1.191	0.0349692	0.00234114	0.0465784	0.000479788	0.0367429	0.00595992	0.0368613	0.002041	0.0414904	0.00249755	0.0315708	0.00114503	0.0001289	0.0002995
1.13.11.90	0.0015259	0.000266492	0.00273879	0.000233365	0.00223994	0.000734018	0.00318578	0.000714094	0.0018746	0.000361336	0.00330766	0.000190131	0.0001289	0.0002995
4.2.1.109	0.00194554	0.000199242	0.00137963	0.000208822	0.00265691	0.000514169	0.0023867	0.000596276	0.00115553	0.000245134	0.00191328	0.000371899	0.0001291	0.0002999
1.8.4.11	0.0765207	0.00186519	0.0785496	0.00310729	0.0693873	0.00456822	0.079916	0.00252366	0.0846076	0.00213554	0.0762812	0.00177213	0.0001294	0.0003003
3.1.4.37	7.89602e-05	4.30963e-05	0.000243788	8.04629e-05	0.000204541	0.000170817	7.18412e-06	1.75974e-05	0.000174742	0.000128618	1.12257e-05	2.12751e-05	0.0001297	0.0003009
6.1.1.22	0.0327248	0.0020602	0.0394603	0.00164142	0.0378067	0.00371008	0.0393686	0.00384353	0.0405548	0.00513175	0.0269938	0.00234127	0.0001299	0.0003013
2.7.1.19	0.0108165	0.00113948	0.0214764	0.0009709	0.0165902	0.00106198	0.0152262	0.00266639	0.0163604	0.00240562	0.0174136	0.00181127	0.00013	0.0003013
2.1.1.8	0.000188214	5.54096e-05	0	0	0	0	4.12304e-05	0.000100993	6.00788e-05	6.8023e-05	0	0	0.0001301	0.0003014
6.3.2.56	0	0	0.000320712	0.000516468	0	0	9.19257e-06	2.25171e-05	8.15924e-06	1.9986e-05	0.000282438	0.000296799	0.0001305	0.0003021
2.1.1.37	0.00817894	0.00142113	0.0103907	0.00179814	0.0150217	0.00771986	0.0113871	0.00268272	0.0133173	0.000921324	0.0195546	0.00172053	0.0001309	0.0003028
5.5.1.25	0.00212489	0.000390207	0.00203044	0.000649117	0.001583	0.000475313	0.00428887	0.0013716	0.00354259	0.00123158	0.00159713	0.000132139	0.0001313	0.0003037
2.3.1.295	0.000737033	0.000130164	0.000200963	0.000121972	0.000721678	0.000286588	0.000370853	9.13723e-05	0.000373306	0.000159051	0.000323919	9.23023e-05	0.0001316	0.0003041
1.1.1.411	0.00709344	0.000931887	0.00667053	0.000113999	0.00437619	0.000864715	0.00414843	0.000799348	0.00360415	0.000748235	0.00364148	0.000460486	0.0001317	0.0003043
1.14.12.1	0.00392412	0.000520233	0.000992571	0.000117753	0.0015304	0.000648991	0.00165087	0.00026351	0.00261745	0.00067956	0.00226261	0.00123419	0.0001321	0.0003049
1.5.3.5	9.4925e-05	8.42979e-05	3.3805e-05	4.67405e-05	0.000242149	8.97612e-05	7.34576e-05	5.59872e-05	2.22005e-05	9.37875e-06	0.000563171	7.33906e-05	0.0001321	0.0003049
1.3.5.3	0.0235138	0.00130346	0.0305744	0.00145595	0.0355752	0.00251897	0.0264164	0.00483953	0.0298723	0.00250671	0.0287674	0.00113152	0.0001322	0.0003049
2.7.11.17	0.000814211	0.000250048	0.000578177	0.00023679	0.00143655	0.000467559	0.0013507	0.000140667	0.00167199	0.000286656	0.000978148	0.00025624	0.0001323	0.0003049
1.4.3.4	0.0315407	0.00251969	0.0195387	0.000630383	0.0273114	0.00453011	0.0250326	0.00340455	0.0206098	0.00229375	0.0296244	0.00190748	0.0001324	0.000305
2.7.1.180	0.0746906	0.00263134	0.0737317	0.00135805	0.0711651	0.00506314	0.0645464	0.00272806	0.0852374	0.00703597	0.0774865	0.00216406	0.0001326	0.0003054
5.1.99.6	0.0668739	0.00152185	0.0689163	0.00219457	0.0720267	0.00374346	0.0751098	0.00532462	0.0789469	0.00172807	0.0790146	0.00189217	0.0001331	0.0003062
2.3.2.6	0.0335737	0.00167283	0.0335623	0.00105098	0.0318559	0.00238493	0.0376466	0.0050655	0.0399929	0.00248363	0.0402263	0.000802318	0.0001332	0.0003062
1.21.4.1	0.0193931	0.00133008	0.0172057	0.00179942	0.0133609	0.00160621	0.0201278	0.00452847	0.0228348	0.00194429	0.0148137	0.00155308	0.0001332	0.0003062
4.2.1.51	0.0590333	0.0018855	0.0536321	0.000940798	0.0543744	0.00329391	0.0578944	0.00288498	0.0574979	0.00196475	0.0640385	0.00139162	0.0001335	0.0003068
3.4.23.36	0.0433591	0.00115558	0.0502175	0.00222511	0.0515075	0.00446426	0.0447528	0.00474561	0.0528285	0.00205527	0.0528527	0.00127326	0.000134	0.0003076
1.20.4.1	0.0196301	0.00111738	0.0320784	0.00112988	0.0235651	0.00447426	0.0280815	0.00358455	0.0308272	0.00246353	0.0278844	0.00287945	0.0001343	0.0003083
1.1.1.31	0.112642	0.00630691	0.0815364	0.00475076	0.0724567	0.0114242	0.0867695	0.0117265	0.0743618	0.00823192	0.0711379	0.00246299	0.0001352	0.0003102
3.1.3.46	0.000728	0.000280746	0.000318203	0.000149158	0.000817113	0.000406425	6.70401e-05	0.000137482	0.00128125	0.00121896	7.67964e-05	5.63417e-05	0.0001356	0.0003109
3.1.2.22	0.000746651	0.000265246	0.000501441	0.000322353	0.000971681	0.000328815	0.000761019	0.000221169	0.00160175	0.000304733	0.000284222	0.00013106	0.0001359	0.0003113
1.3.99.32	0.0132709	0.000886817	0.0128928	0.00108992	0.0118494	0.000603083	0.00874848	0.00228151	0.0101228	0.00208792	0.0083376	0.000982223	0.0001361	0.0003116
1.14.12.19	0.00494167	0.000856962	0.000691041	0.000575275	0.00137957	0.000592056	0.00204231	0.000410939	0.00302029	0.000662072	0.00471908	0.00442948	0.0001361	0.0003116
2.7.7.101	0.0804819	0.00379666	0.0891079	0.0023557	0.0906711	0.00945804	0.0904058	0.00188626	0.0953086	0.00648282	0.10773	0.00344983	0.0001366	0.0003124
1.6.99.1	0.0234819	0.00211855	0.0283848	0.000917053	0.0291128	0.000948326	0.028712	0.00740541	0.0374363	0.00338003	0.0365455	0.00230278	0.0001367	0.0003124
1.1.2.11	0.0212311	0.00234339	0.025366	0.00489229	0.0187319	0.00169808	0.0186238	0.00324292	0.0126864	0.00344087	0.0116442	0.00105555	0.0001367	0.0003124
2.1.1.386	0.0020001	0.000470773	0.000732006	0.000238657	0.00118004	0.000216133	0.0021446	0.000702938	0.00136232	0.000396073	0.000972024	0.000148051	0.0001368	0.0003124
2.2.1.2	0.0986514	0.00242541	0.0821977	0.00198823	0.0928547	0.00763779	0.0815506	0.0052586	0.0966509	0.00578229	0.082141	0.00220265	0.0001369	0.0003124
6.2.1.5	0.135077	0.00452547	0.149997	0.00293389	0.140234	0.005426	0.147756	0.0172911	0.120359	0.00343033	0.146686	0.001856	0.0001371	0.0003127
7.3.2.1	0.0799128	0.00242986	0.0866482	0.00195392	0.087449	0.00371558	0.0844819	0.00277541	0.0840139	0.00299013	0.0933904	0.00264253	0.0001374	0.0003134
1.4.9.1	0.0086521	0.0006608	0.00861021	0.00105091	0.00790616	0.00130289	0.00526609	0.00186445	0.00504502	0.000664016	0.00498102	0.000909488	0.0001378	0.000314
1.1.1.410	0.00832686	0.000669551	0.0072396	0.000520075	0.00677728	0.00166294	0.00545849	0.00132634	0.00324657	0.000317883	0.00682884	0.000528985	0.0001381	0.0003146
3.2.1.81	0.000968414	0.000203272	0.000879868	0.000187527	0.00162878	0.000592195	0.00161587	0.000408691	0.00251671	0.000457461	0.00137862	0.000270816	0.0001382	0.0003147
1.3.8.5	0.0173387	0.00157818	0.0121048	0.00117817	0.0128135	0.00202698	0.0160263	0.00294212	0.0177075	0.000730888	0.0223807	0.000847089	0.0001384	0.0003149
2.7.7.53	0.0242914	0.00147052	0.0240125	0.00138291	0.025067	0.00233429	0.0277066	0.00414273	0.0321726	0.00212628	0.0367322	0.00223553	0.0001389	0.0003158
1.3.98.3	0.0732781	0.00274329	0.0984596	0.000175907	0.0880129	0.00828943	0.0935453	0.00680559	0.0979125	0.00303275	0.0917467	0.00263958	0.0001391	0.0003162
4.1.2.14	0.0196359	0.00184346	0.0272058	0.00100465	0.0243533	0.00081559	0.0224488	0.00312199	0.0229154	0.00097393	0.0181523	0.000936518	0.0001392	0.0003162
1.1.1.2	0.0200246	0.00145623	0.0163635	0.00243719	0.0182268	0.00207141	0.0237198	0.00268852	0.0308083	0.00241533	0.0200889	0.00116364	0.0001394	0.0003163
1.1.1.327	0.000599442	0.000168231	0.000961659	0.000336782	0.00030528	0.000155041	0.000976878	0.000346072	0.00148337	0.000397174	0.000422343	0.000118094	0.0001394	0.0003163
3.1.26.11	0.134565	0.00397279	0.14553	0.00190693	0.116471	0.00557722	0.142727	0.0213198	0.163245	0.00899931	0.146533	0.00405441	0.0001395	0.0003163
2.7.7.19	0.0563242	0.00277413	0.0645802	0.0025263	0.0638112	0.00381426	0.0655796	0.0059405	0.0666881	0.00163836	0.0722437	0.00214543	0.0001396	0.0003166
5.4.99.22	0.0407089	0.00103485	0.0472165	0.00229617	0.0472509	0.00248463	0.040635	0.00229331	0.0463906	0.00229187	0.0467615	0.000429909	0.00014	0.0003172
1.14.15.32	0.000418246	0.000131648	0.000165191	3.86393e-05	0.000479207	0.000286462	0.000125674	8.29618e-05	0.000151201	7.08375e-05	0.000418255	7.60429e-05	0.0001402	0.0003174
1.1.3.47	0.00735718	0.00107213	0.00257901	0.000570432	0.00436206	0.00108267	0.00385332	0.00055148	0.00377472	0.000629533	0.00354861	0.00021128	0.0001403	0.0003175
2.4.1.266	0.0286404	0.00214716	0.0234906	0.00118274	0.0211872	0.00123279	0.0271993	0.00382161	0.0299753	0.0015432	0.0232156	0.00115927	0.0001404	0.0003176
3.6.1.67	0.00344012	0.000475698	0.00621498	0.00087923	0.00384932	0.000870239	0.00486715	0.000713914	0.00584742	0.00124591	0.00619677	0.000439392	0.0001412	0.0003193
3.4.17.19	0.0311497	0.00193609	0.0312289	0.00126487	0.0363179	0.00304551	0.0276588	0.00364781	0.0259316	0.00224348	0.0265421	0.00120961	0.0001415	0.0003198
2.5.1.55	0.025316	0.00115046	0.0299945	0.00119061	0.0284168	0.00420381	0.0302272	0.00278234	0.0297652	0.00316778	0.0218584	0.00137444	0.0001417	0.00032
4.2.1.114	0.00279138	0.000422394	0.00163406	0.000373084	0.00506234	0.0021873	0.00217563	0.000384132	0.00360361	0.000559633	0.00234645	0.000224014	0.0001418	0.00032
1.14.11.39	0.000443849	0.000200875	0.000585097	0.000332877	0.00104019	0.000458937	0.00162302	0.000775094	0.00155242	0.000265172	0.0022701	0.000556779	0.0001423	0.000321
6.2.1.16	0.0513488	0.00375314	0.0523618	0.00547376	0.0457931	0.00516318	0.0618287	0.00485395	0.0560459	0.00471722	0.0617243	0.00267898	0.0001428	0.000322
1.14.11.16	0.00157624	0.000233473	0.00365826	0.000465384	0.0029525	0.000664672	0.00238535	0.000771735	0.00152079	0.000165428	0.0037074	0.000616711	0.000143	0.0003223
2.4.2.52	0.00630713	0.000734164	0.00383629	0.000430836	0.00618963	0.00185823	0.00373664	0.000702468	0.00706953	0.00113648	0.00416183	0.000649888	0.0001438	0.0003238
3.5.1.125	0.00523652	0.00102247	0.0048539	0.000768432	0.00426741	0.000835161	0.00476104	0.00214397	0.00178383	0.000241333	0.00196911	0.000291783	0.0001442	0.0003246
3.4.21.19	0.00373078	0.000534966	0.00210931	0.000241697	0.00395022	0.000606352	0.0028176	0.000654276	0.00462405	0.000546336	0.00275411	0.000378525	0.0001443	0.0003246
5.1.3.11	0.00574887	0.000646806	0.00707974	0.000840747	0.0062872	0.000631792	0.00549794	0.000925294	0.0117397	0.000852706	0.00477468	0.000763985	0.000145	0.000326
1.17.1.10	0.0994034	0.00695478	0.115141	0.00182425	0.088417	0.00384677	0.100928	0.0124139	0.0873883	0.00350996	0.0800006	0.00627011	0.0001451	0.000326
3.2.1.20	0.0790903	0.0078954	0.0685957	0.0010404	0.095066	0.00495532	0.0890178	0.0177959	0.100211	0.00284687	0.104604	0.0034633	0.0001453	0.0003263
3.5.4.39	0.00227848	0.000226748	0.00194521	0.000234828	0.0023787	0.000414184	0.00167846	0.000417576	0.00310742	0.000510488	0.00293585	0.000233435	0.0001458	0.0003274
3.2.1.45	0.0253711	0.00196287	0.0372049	0.000830065	0.0373617	0.00482835	0.0267843	0.00517202	0.0374316	0.00594098	0.0400563	0.00150147	0.0001469	0.0003295
1.1.3.9	0.00582336	0.000607248	0.00141862	0.000334059	0.0050045	0.00168197	0.0039875	0.00127812	0.00374277	0.000820972	0.00243873	0.000340398	0.0001469	0.0003295
2.4.1.92	0.000362272	0.000112366	0.000130483	8.6199e-05	0.000650922	0.00022673	0.000259769	0.000154611	0.00023	5.18601e-05	5.53586e-05	4.74594e-05	0.0001477	0.000331
2.7.1.168	0.0180391	0.00134202	0.0153729	0.00228429	0.0177388	0.00144422	0.0125908	0.00320005	0.0194449	0.00281747	0.012716	0.0014543	0.0001492	0.0003342
1.16.99.1	0.00787327	0.00146748	0.00995314	0.000750203	0.0108652	0.000926815	0.00813077	0.00165638	0.0141636	0.00167864	0.00752305	0.00027779	0.0001492	0.0003342
3.4.21.53	0.229342	0.0070866	0.283487	0.00529063	0.256078	0.0116325	0.249691	0.0292563	0.221749	0.0126408	0.205142	0.00519539	0.0001498	0.0003352
5.4.99.12	0.0422069	0.000725209	0.0506857	0.00227749	0.0474581	0.00446671	0.0452146	0.00296821	0.0493834	0.00317162	0.052126	0.000366845	0.0001504	0.0003364
2.3.1.260	0.000599511	0.000228081	0.000160041	0.000103769	0.000149801	0.000164471	1.68467e-05	2.61814e-05	0.000189379	8.30958e-05	6.65396e-05	8.80715e-05	0.0001504	0.0003364
1.14.12.17	0.0088389	0.000728045	0.00683828	0.000980546	0.00600863	0.00107647	0.00582149	0.00143372	0.00322988	0.00043405	0.00676882	0.00353489	0.0001507	0.0003367
1.1.99.6	2.18405e-06	6.55214e-06	0.000161114	3.42515e-05	2.23757e-05	2.5882e-05	0	0	0	0	0	0	0.0001507	0.0003367
5.1.1.1	0.0557559	0.00138269	0.0654007	0.00145987	0.0621465	0.0067347	0.0615133	0.00251687	0.0691108	0.00539616	0.0629107	0.00232496	0.0001512	0.0003375
1.14.13.246	0.000521019	0.000153391	8.02475e-05	2.419e-05	0.000911936	0.000557838	0.000315594	0.00018902	6.74684e-05	4.24551e-05	6.27128e-05	5.61116e-05	0.0001517	0.0003384
1.4.1.2	0.0891219	0.00392626	0.100984	0.00403765	0.0892986	0.00311737	0.113187	0.0180592	0.0876696	0.00682676	0.103981	0.00347022	0.0001519	0.0003386
3.1.21.2	0.0265769	0.000968295	0.0246898	0.000457426	0.0260861	0.0024245	0.0212166	0.0023238	0.0235651	0.0025663	0.0197608	0.000659783	0.0001522	0.0003389
7.1.1.4	0.000123033	9.29733e-05	1.52353e-05	2.63884e-05	2.58422e-05	3.23023e-05	1.42909e-05	3.50054e-05	0	0	0	0	0.0001522	0.0003389
5.1.1.4	0.0135258	0.00103981	0.0107254	0.000706713	0.012326	0.00135238	0.0141433	0.00272256	0.0182758	0.000671502	0.010784	0.000717124	0.0001525	0.0003395
4.1.1.90	0.00679377	0.000722607	0.0050703	0.000349667	0.00770356	0.000778524	0.00619678	0.00146493	0.00476642	0.000975917	0.004581	0.000734351	0.0001533	0.0003412
3.4.22.47	5.49897e-06	1.10036e-05	3.17269e-05	5.49526e-05	0.000325104	0.000425973	4.29593e-05	4.51432e-05	0.000998019	0.000479183	5.2744e-05	5.1052e-05	0.0001535	0.0003413
3.1.6.20	0.0157634	0.00097466	0.0314006	0.00209497	0.020993	0.00139434	0.0261084	0.00312762	0.0228613	0.00625822	0.0202258	0.00220577	0.0001536	0.0003415
4.2.3.156	0.00543518	0.00109651	0.00503778	0.000923937	0.00463471	0.000468814	0.00381733	0.000995185	0.00289322	0.000422296	0.00337593	0.000160342	0.0001541	0.0003423
1.1.3.41	0.00360228	0.000829857	0.00188687	0.000449838	0.0019269	0.000948617	0.00112267	0.000175636	0.00174635	0.00051524	0.00191697	0.000185149	0.0001541	0.0003423
1.14.20.5	5.60143e-06	1.1165e-05	2.16071e-05	1.89952e-05	6.1368e-05	3.14816e-05	0	0	0	0	4.05471e-06	9.93197e-06	0.0001545	0.0003428
3.2.1.91	0.0143835	0.00133921	0.0177582	0.00144293	0.0151722	0.00213534	0.0113959	0.00162491	0.0125475	0.00125022	0.011193	0.000938442	0.0001548	0.0003434
3.5.2.7	0.0635591	0.00135745	0.0791528	0.00555914	0.0661658	0.00259353	0.0623245	0.00423386	0.0701485	0.00117865	0.0614422	0.00158987	0.0001559	0.0003454
2.3.1.54	0.0070008	0.00220363	0.00373823	0.00169607	0.00489769	0.00113301	0.0105003	0.00485184	0.00876229	0.000772489	0.0259397	0.00163642	0.0001559	0.0003454
2.4.1.20	0.0237936	0.00324421	0.0298257	0.00442972	0.0313278	0.00451754	0.029196	0.0112742	0.0393886	0.00278431	0.0466985	0.00166227	0.0001562	0.000346
3.6.1.11	0.0729674	0.00392443	0.0641681	0.00113925	0.0670578	0.00314024	0.0741127	0.00466589	0.0657032	0.00228506	0.0786917	0.00144831	0.0001566	0.0003463
3.6.1.40	0.0729674	0.00392443	0.0641681	0.00113925	0.0670185	0.00314723	0.0741127	0.00466589	0.0656729	0.00230703	0.0786917	0.00144831	0.0001566	0.0003463
1.1.99.36	0.00546468	0.000880971	0.00164052	0.000534138	0.0035639	0.0010269	0.00329234	0.000500344	0.00502754	0.00110256	0.00316453	0.000173379	0.0001566	0.0003463
3.6.1.16	0.00268167	0.000288882	0.0034057	0.000548421	0.0022365	0.000458641	0.00180303	0.000428403	0.00289884	0.000390941	0.00178085	0.000122145	0.0001573	0.0003475
3.6.1.53	0.00268167	0.000288882	0.0034057	0.000548421	0.0022365	0.000458641	0.00180303	0.000428403	0.00289884	0.000390941	0.00178085	0.000122145	0.0001573	0.0003475
1.1.1.79	0.0277972	0.00223012	0.0259717	0.0035875	0.0229213	0.00161286	0.0225427	0.00288194	0.0186319	0.00179563	0.0214307	0.00205466	0.0001576	0.0003479
3.1.4.14	0.00341186	0.000719648	0.00656273	0.000453338	0.00578213	0.00281536	0.00606468	0.00113089	0.00955684	0.000432557	0.00455059	0.00088581	0.0001577	0.0003479
3.2.2.10	0.00737755	0.000677152	0.015592	0.00157661	0.0117473	0.00194239	0.0130608	0.00331204	0.0115229	0.00123823	0.0102521	0.00124447	0.0001583	0.0003491
1.14.19.47	0.00151298	0.000410303	0.000773873	0.000314264	0.000928746	0.000595536	0.000250477	0.000169954	0.000526912	0.000181964	0.000274077	8.46414e-05	0.0001586	0.0003495
1.14.19.38	0.00151298	0.000410303	0.000773873	0.000314264	0.000928746	0.000595536	0.000250477	0.000169954	0.000526912	0.000181964	0.000274077	8.46414e-05	0.0001586	0.0003495
2.5.1.47	0.113544	0.00236136	0.136664	0.00165617	0.109692	0.00416417	0.118275	0.012459	0.100003	0.00222829	0.10832	0.00170224	0.000159	0.0003502
3.6.1.73	0.00332808	0.000399303	0.00467867	0.000937378	0.00482468	0.000660396	0.00316632	0.0004572	0.00524094	0.000960676	0.00317682	0.000349937	0.0001591	0.0003503
1.20.4.4	0.0589023	0.00240687	0.0551205	0.0030146	0.0624936	0.00300113	0.0612926	0.00618443	0.066697	0.00364303	0.0900808	0.00374443	0.0001609	0.0003535
1.4.3.3	0.0108556	0.00103798	0.00735206	0.000735159	0.00644315	0.0013735	0.010811	0.00192344	0.00805748	0.00140922	0.00706536	0.000729748	0.0001609	0.0003535
3.1.1.72	0.000861531	0.000284091	0.000981142	0.000362599	0.000480317	0.000208608	0.00133278	0.000457038	0.00263255	0.000831267	0.000878429	0.000125624	0.0001609	0.0003535
1.3.1.3	0.0051064	0.000650193	0.00196749	0.00038325	0.00219317	0.000410009	0.00220941	0.000578648	0.00181875	0.000397924	0.00261483	0.000373577	0.000161	0.0003537
5.1.3.37	0.00153509	0.00050429	0.00151666	0.00072263	0.000824153	0.000499829	0.00135498	0.00103552	0.000355403	0.000217006	0.000166401	7.18614e-05	0.0001627	0.0003571
3.1.4.56	0.00025061	0.000129345	0.000311738	0.000124948	0.000546716	0.000112231	0.000406424	0.000124601	0.00230959	0.00106102	0.000290211	0.00013317	0.000163	0.0003576
1.14.15.27	0.00297294	0.000401227	0.000832345	7.96288e-05	0.00138387	0.000639671	0.00093358	0.000166216	0.00139209	0.000346868	0.00125945	0.000204283	0.0001637	0.0003589
2.1.1.256	0.00167996	0.000493949	0.00127719	0.000232495	0.0035753	0.000791414	0.0028971	0.00106662	0.00495443	0.0012482	0.00342197	0.000403113	0.0001642	0.0003599
1.1.1.205	0.0822153	0.00183843	0.0830912	0.00209706	0.0833938	0.00282049	0.0837973	0.00331956	0.0745753	0.0013065	0.0914441	0.00145061	0.0001653	0.0003621
3.5.1.119	0.0178952	0.00150004	0.0114123	0.00149205	0.0141911	0.0035656	0.0181794	0.00167391	0.0163986	0.00278899	0.0237895	0.000720426	0.0001658	0.0003629
1.1.1.100	0.587284	0.013933	0.442039	0.0230806	0.4681	0.027691	0.46701	0.0110247	0.487455	0.0230569	0.460822	0.00360403	0.0001659	0.0003631
6.5.1.9	0.00148983	0.000406925	0.00251244	0.000528656	0.000925227	0.000475311	0.000630557	0.000271227	0.000496936	0.000100081	0.000961826	0.000120361	0.0001663	0.0003637
4.2.1.19	0.0377423	0.00142076	0.0455608	0.00194295	0.0416201	0.00168075	0.0445757	0.00322153	0.0429826	0.00083487	0.0417858	0.00158977	0.0001673	0.0003656
4.2.1.3	0.163814	0.0042071	0.173308	0.00541831	0.180209	0.00809099	0.172976	0.0167904	0.142985	0.00544273	0.177053	0.00280312	0.0001674	0.0003656
2.4.1.303	0	0	0	0	0	0	8.73497e-05	7.92823e-05	0.000121906	7.1286e-05	1.21131e-05	1.87745e-05	0.0001674	0.0003656
3.2.2.27	0.0855376	0.00182176	0.0874533	0.0017764	0.0876821	0.00229708	0.0840548	0.00554125	0.0940781	0.00244811	0.0958163	0.00256068	0.000168	0.0003664
2.4.1.259	0.000273623	8.06003e-05	0.000425686	0.000135749	0.000788112	0.000303037	0.00111261	0.000243294	0.00101603	0.000351494	0.00114226	0.000136918	0.0001681	0.0003664
2.4.1.261	0.000273623	8.06003e-05	0.000425686	0.000135749	0.000788112	0.000303037	0.00111261	0.000243294	0.00101603	0.000351494	0.00114226	0.000136918	0.0001681	0.0003664
1.14.11.15	0.00047973	0.000142179	0.000180615	2.71883e-05	0.000524235	0.000234764	0.000949949	0.000397538	0.000885548	0.000241536	0.000341329	0.000117703	0.0001685	0.0003673
3.4.17.20	0.000626116	0.00020319	0.000361068	0.000171187	0.000772473	0.000153664	0.000272304	0.000218864	0.000180435	9.70867e-05	0.000373457	6.71756e-05	0.0001686	0.0003674
2.3.1.117	0.0294706	0.00192107	0.035695	0.00156901	0.0319414	0.00239757	0.0340645	0.00262333	0.0309786	0.00370531	0.041182	0.00192327	0.0001689	0.0003677
2.4.1.224	0.00529869	0.000456005	0.00453602	0.00037981	0.00467867	0.000429495	0.00488681	0.00144836	0.00279205	0.000316941	0.00350411	0.000485321	0.0001691	0.0003677
2.4.1.225	0.00529869	0.000456005	0.00453602	0.00037981	0.00464732	0.000467137	0.00488681	0.00144836	0.00279205	0.000316941	0.00350411	0.000485321	0.0001691	0.0003677
3.1.3.97	0.0263897	0.00309298	0.0384705	0.00140594	0.0384642	0.00748217	0.0331778	0.00584395	0.0443141	0.0050237	0.0332283	0.00129792	0.00017	0.0003696
3.1.3.57	0.000702033	0.000201804	0.000624646	0.000106799	0.00135825	0.00045859	0.000541069	0.000176698	0.00146907	0.000336767	0.000515079	0.000142508	0.0001701	0.0003696
2.1.1.172	0.00994163	0.00141074	0.00895267	0.000280618	0.0117518	0.00108652	0.0117327	0.00330713	0.0159951	0.00189374	0.0163119	0.00271279	0.0001708	0.0003708
2.7.1.105	0.000752021	0.000274018	0.000495648	0.000192343	0.000899127	0.000337294	2.91754e-05	4.87396e-05	0.00127534	0.00123806	4.67816e-05	4.45734e-05	0.000171	0.0003712
2.5.1.25	0.000880907	0.000462922	0.000691483	0.000217926	0.00105295	0.000443913	8.8548e-05	9.36412e-05	0.000578094	0.000272824	0.00012344	0.000104183	0.0001718	0.0003726
3.4.11.6	0.0509599	0.00220049	0.072443	0.00256585	0.0581908	0.00333267	0.0578231	0.00692493	0.0598868	0.0043958	0.0499921	0.0014949	0.0001719	0.0003726
2.1.1.285	0.00023963	9.41246e-05	3.87649e-05	4.29644e-05	0.000150382	0.000105322	6.49183e-05	3.97686e-05	7.08475e-06	1.7354e-05	2.6468e-05	3.22728e-05	0.0001719	0.0003726
2.1.2.2	0.0431564	0.00167999	0.0471924	0.00407111	0.0444869	0.00286931	0.0453308	0.00244766	0.0500416	0.000560696	0.0519045	0.0013426	0.0001726	0.0003739
1.5.99.4	0.000363125	0.000144851	0.000190981	0.000127215	2.94462e-05	3.97167e-05	6.68775e-05	7.77321e-05	8.64287e-05	7.84151e-05	0.000226635	7.52678e-05	0.0001727	0.0003739
2.3.1.20	0.144406	0.00314065	0.134271	0.00530915	0.130031	0.0137159	0.158978	0.0326114	0.181241	0.0252958	0.257163	0.00813112	0.0001729	0.000374
2.7.1.210	0.00164311	0.000490634	0.00124151	0.000308752	0.00152667	0.0004908	0.000631431	0.000201286	0.0013678	0.000202439	0.000811352	8.27844e-05	0.0001732	0.0003744
2.8.2.5	0.00551079	0.000668697	0.00580031	0.000687092	0.00576516	0.000904477	0.0059506	0.00112452	0.0101678	0.000490834	0.0114265	0.000387897	0.0001733	0.0003744
1.14.15.16	0.000144901	5.53301e-05	0	0	2.87684e-05	2.78242e-05	9.03827e-05	8.35112e-05	0	0	3.46968e-06	8.49894e-06	0.0001733	0.0003744
1.14.15.31	0.00989774	0.000861359	0.00543525	0.00156739	0.0056972	0.00140845	0.00424008	0.000621899	0.00411693	0.000921563	0.00452485	0.000348617	0.0001736	0.0003749
1.8.7.2	0.00242559	0.000493134	0.00266748	0.000787904	0.00470792	0.00203163	0.00546925	0.00145679	0.00437785	0.00103517	0.00218123	0.000481958	0.0001738	0.0003751
3.1.30.1	0.00532513	0.000525973	0.00715661	0.0015835	0.00364106	0.000749719	0.00646399	0.00141351	0.00515159	0.00111474	0.00433507	0.000517923	0.0001739	0.0003751
4.3.2.7	0.0184287	0.00185949	0.0194712	0.00329421	0.0146584	0.00249175	0.0157761	0.00371139	0.0099925	0.00121599	0.0124084	0.00138908	0.0001741	0.0003754
2.3.1.201	0.038259	0.00275244	0.0334388	0.00129526	0.0369972	0.00415458	0.0379415	0.0031745	0.0468664	0.00828994	0.0303429	0.00138459	0.0001745	0.000376
2.8.3.27	0.00200567	0.00035622	0.000858919	0.000608471	0.000802629	0.000372857	0.000360687	0.000224677	0.000965246	0.000375843	0.000918686	0.0001721	0.000175	0.000377
6.2.1.22	0.000315148	0.00012242	2.65364e-05	2.31266e-05	0.000473986	0.000258408	0.000152903	9.79874e-05	9.43691e-05	4.29816e-05	6.86176e-05	7.25315e-05	0.0001754	0.0003777
2.4.2.53	0.0187549	0.00141807	0.0203355	0.00122038	0.0174991	0.00280998	0.0179654	0.00135413	0.0221947	0.0016827	0.0142464	0.00107966	0.0001757	0.0003781
1.11.1.17	0.000136482	7.63837e-05	0.00034929	6.05541e-05	4.54944e-05	4.38173e-05	0.000617413	0.000408783	0.000574591	0.000403823	0.000405064	7.45602e-05	0.0001759	0.0003782
5.3.1.30	0.0116724	0.00105374	0.0114844	0.000677168	0.0129967	0.00165191	0.00857711	0.00200639	0.00792086	0.00113695	0.00813664	0.000993326	0.000176	0.0003782
1.14.19.58	2.42666e-05	4.03886e-05	0	0	0	0	5.19779e-05	2.87722e-05	7.01826e-05	5.73114e-05	0	0	0.0001761	0.0003784
4.4.1.3	0.002164	0.000416669	0.00148357	0.000257373	0.0013262	0.000278194	0.0022258	0.000762984	0.00209411	0.000277632	0.000449428	0.000210768	0.0001762	0.0003784
6.3.2.13	0.0675534	0.00132109	0.0719817	0.00121161	0.0710994	0.00451402	0.0739692	0.00309221	0.0783038	0.00238125	0.0733258	0.0025431	0.0001771	0.0003802
1.7.1.14	0.000234972	0.000126543	0	0	2.20064e-05	2.56653e-05	4.88539e-05	5.87134e-05	3.16629e-05	3.97043e-05	0.000224851	4.17653e-05	0.0001779	0.0003816
1.14.15.22	0.000519752	0.000177623	0.000479868	0.000236244	0.000194765	0.000132932	6.8957e-05	0.000122632	0.000106351	8.42296e-05	0.000274675	8.4828e-05	0.0001782	0.0003821
2.4.1.380	0.011768	0.00111353	0.00791058	0.000670122	0.010779	0.00131953	0.00970411	0.0022459	0.0153469	0.000921113	0.00941805	0.00099702	0.0001783	0.0003821
3.1.6.21	0.0667725	0.00340758	0.0748507	0.00339409	0.0995595	0.0143789	0.0811763	0.0111438	0.0810861	0.0121782	0.0990581	0.00330301	0.0001788	0.0003829
2.7.1.206	0.00130451	0.000582847	0.000815001	0.000710936	0.000590901	0.000438047	0.00022935	0.000169169	9.01039e-05	9.74344e-05	8.9963e-05	6.40739e-05	0.0001788	0.0003829
2.5.1.76	0.000292286	0.000170495	0.000470585	0.000363591	0.0026805	0.00128557	0.00020485	0.000378148	0.0012313	0.000723415	0.000303721	8.85227e-05	0.0001789	0.0003829
1.3.1.121	0.000530485	0.000128518	1.87512e-05	3.2478e-05	0.000136645	9.08471e-05	0.000105317	7.68498e-05	3.60988e-05	2.55674e-05	5.51169e-05	5.12503e-05	0.000179	0.0003829
3.4.21.21	0.000612683	0.000206952	0.000990912	0.000879934	0.00124217	0.000286285	0.00146028	0.000244943	0.00198937	0.000314446	0.0017655	0.000324858	0.0001793	0.0003832
3.4.24.29	0.000862444	0.000279926	0.000452367	0.00010904	0.000174167	0.000137482	0.000267534	0.000176009	0.000232715	5.90443e-05	0.000142493	0.000111566	0.0001797	0.000384
1.1.1.122	0.0163372	0.00134715	0.0116452	0.000981929	0.0129085	0.00311432	0.01329	0.00151091	0.0123444	0.000872876	0.00903743	0.000457791	0.000181	0.0003859
6.4.1.5	0.00880471	0.000416277	0.00898853	0.000979363	0.0135392	0.000976228	0.0102856	0.00219519	0.0103133	0.000865328	0.0122387	0.00133859	0.000181	0.0003859
1.3.2.4	0.00356042	0.000746156	0.00264743	0.000296599	0.00244594	0.000442775	0.00205197	0.000192888	0.00227444	0.000227244	0.00302472	0.000427811	0.000181	0.0003859
5.1.1.24	0	0	0	0	0.000110669	9.14826e-05	0	0	0	0	4.3069e-06	1.05497e-05	0.000181	0.0003859
3.2.1.207	4.08662e-06	1.22599e-05	0	0	0.000229898	0.00021477	0.00016571	0.000237086	8.74682e-05	3.09705e-05	0.000480681	4.98952e-05	0.0001812	0.0003861
1.5.3.22	0.000447817	0.000118772	0.000559117	0.000130209	0.00080876	0.000284002	0.000725767	0.000413784	0.00229988	0.000446913	0.00124925	0.000214131	0.0001813	0.0003863
4.1.1.11	0.0143333	0.000869487	0.0177767	0.000889916	0.0173671	0.00271459	0.0181531	0.00185137	0.0213039	0.00178863	0.0159851	0.00121299	0.000182	0.0003874
3.1.26.8	2.33669e-05	3.2653e-05	0.000219529	0.000123352	8.12862e-05	7.48793e-05	0	0	7.71835e-05	9.73035e-05	0.000423309	0.000316214	0.0001826	0.0003885
1.14.13.218	0.011662	0.000951933	0.00486406	0.000213508	0.00440294	0.00130109	0.00403032	0.000580405	0.00379158	0.000810687	0.00459112	0.000317833	0.0001828	0.0003887
2.1.1.176	0.0500548	0.00130187	0.0591045	0.00107844	0.0531859	0.0031596	0.0554816	0.00410064	0.053255	0.00276374	0.0629462	0.00172761	0.0001834	0.0003898
2.3.1.203	0.000420537	0.000134736	0.00395259	0.00102899	0.00154576	0.000819439	0.000915972	0.000300965	0.000991036	0.000316331	0.00108261	0.000172572	0.0001839	0.0003905
3.4.24.70	0.0234115	0.00162871	0.0361827	0.000868849	0.0263423	0.0015578	0.0350704	0.00597502	0.02628	0.00299557	0.0248253	0.00139587	0.000184	0.0003905
4.2.1.83	0.0188542	0.001707	0.00834494	0.00064337	0.00847323	0.002346	0.00629069	0.00227108	0.00610362	0.00112097	0.00526811	0.000348453	0.000184	0.0003905
2.7.7.39	0.00135846	0.000432271	0.00247384	0.000154653	0.00158052	0.000722112	0.00223081	0.000238265	0.00234046	0.000457019	0.00584744	0.000313829	0.0001844	0.0003912
1.14.11.18	0.0302975	0.00388968	0.0274626	0.0029273	0.0274632	0.00225968	0.0374352	0.00727362	0.0231138	0.00353212	0.0238389	0.000935969	0.0001848	0.0003918
[truncated: 1,917 more rows]
