# Supplementary material for: Divergent microbial community and functional dynamics in mangrove sediments along a polycyclic aromatic hydrocarbons (PAHs) gradient in China
Source: Research Square preprint supplement (doi:10.21203/rs.3.rs-7178259/v1), 2025-09-17
Supplement: Supplementary file 5 [file 5170be54d0cf67a1365cfb3e.xlsx]

## Sheet: M5enzyme
Enzyme biomarkers	DY AVE	DY SD	CPT AVE	CPT SD	FG AVE	FG SD	M1 AVE	M1 SD	M2 AVE	M2 SD	M3 AVE	M3 SD	TOTAL	Description
1.1.3.6	4260.67	721.871	6232	475.717	6609.67	1029.47	4502.67	1234.83	8952	820.841	10694.3	976.989	253422	Oxidoreductases;Acting on the CH-OH group of donors;With oxygen as acceptor;cholesterol:oxygen oxidoreductase
1.1.5.3	7233.33	839.62	10480.2	935.846	9880	1925.12	8079.33	1826.18	14279.3	1715.76	13586.7	1358.11	390974	Oxidoreductases;Acting on the CH-OH group of donors;With a quinone or similar compound as acceptor;sn-glycerol 3-phosphate:quinone oxidoreductase
1.12.1.3	6315.33	707.803	7210.67	857.298	8917	1410.68	6212.67	1596.29	12107.3	2201.74	10868.3	702.425	312474	Oxidoreductases;Acting on hydrogen as donor;With NAD+ or NADP+ as acceptor;hydrogen:NADP+ oxidoreductase
1.12.1.5	2483.33	473.968	3649.56	311.369	3902.67	933.392	3157.67	882.806	4944	464.469	7199	586.257	155516	Oxidoreductases;Acting on hydrogen as donor;With NAD+ or NADP+ as acceptor;hydrogen:NAD(P)+ oxidoreductase
1.13.11.24	6711.33	1074.9	7954.22	683.706	7487.33	1357.69	6371	1218.88	9458.33	862.966	10668	1316.33	295630	Oxidoreductases;Acting on single donors with incorporation of molecular oxygen (oxygenases);With incorporation of two atoms of oxygen;quercetin:oxygen 2,3-oxidoreductase (ring-opening)
1.14.13.8	737.333	101.12	2062.22	184.839	1831.33	320.396	2087	574.137	2766	278.326	4560.33	462.604	88240	Oxidoreductases;Acting on paired donors, with incorporation or reduction of molecular oxygen;With NADH or NADPH as one donor, and incorporation of one atom of oxygen into the other donor;N,N-dimethylaniline,NADPH:oxygen oxidoreductase (N-oxide-forming)
1.18.1.3	2982	502.287	5203.11	439.498	4277	945.667	2812.33	631.946	4067.33	472.315	5959	826.333	158468	Oxidoreductases;Acting on iron-sulfur proteins as donors;With NAD+ or NADP+ as acceptor;ferredoxin:NAD+ oxidoreductase
1.2.1.16	8292	1553.88	12049.1	850.208	10393.3	1944.11	7929.33	1556.49	11525.7	1219.29	14440.7	1631.57	399052	Oxidoreductases;Acting on the aldehyde or oxo group of donors;With NAD+ or NADP+ as acceptor;succinate-semialdehyde:NAD(P)+ oxidoreductase
1.2.1.20	8198	1524.72	11878.2	834.688	10245	1902.9	7858.67	1532.77	11485	1209.88	14234.7	1630	394438	Oxidoreductases;Acting on the aldehyde or oxo group of donors;With NAD+ or NADP+ as acceptor;glutarate-semialdehyde:NADP+ oxidoreductase
1.2.1.5	1068	265.277	1055.56	125.785	917	223.434	1602.33	574.486	1864	253.273	5161.33	362.577	69972	Oxidoreductases;Acting on the aldehyde or oxo group of donors;With NAD+ or NADP+ as acceptor;aldehyde:NAD(P)+ oxidoreductase
1.2.1.79	8198	1524.72	11878.2	834.688	10245	1902.9	7858.67	1532.77	11485	1209.88	14234.7	1630	394438	Oxidoreductases;Acting on the aldehyde or oxo group of donors;With NAD+ or NADP+ as acceptor;succinate-semialdehyde:NADP+ oxidoreductase
1.2.1.8	2032	229.007	3072.67	299.112	2584.67	672.939	1527.33	397.095	2608.33	271.318	5561.33	730.783	107440	Oxidoreductases;Acting on the aldehyde or oxo group of donors;With NAD+ or NADP+ as acceptor;betaine-aldehyde:NAD+ oxidoreductase
1.2.1.80	799.333	65.9191	803.333	114.197	1951.33	428.786	1635.33	550.948	2208.67	225.788	3415	265.965	64890	Oxidoreductases;Acting on the aldehyde or oxo group of donors;With NAD+ or NADP+ as acceptor;long-chain-aldehyde:NAD(P)+ oxidoreductase (acyl-[acyl-carrier protein]-forming)
1.2.4.1	14870.7	1952.64	19673.1	1539.8	19596.7	3538.19	14522	2409.14	21632.3	2314.43	24434.7	1756.13	702784	Oxidoreductases;Acting on the aldehyde or oxo group of donors;With a disulfide as acceptor;pyruvate:[dihydrolipoyllysine-residue acetyltransferase]-lipoyllysine 2-oxidoreductase (decarboxylating, acceptor-acetylating)
1.2.4.2	10027.3	1164.93	13016.9	934.111	13059.7	2008.17	10337.3	1620.09	15494	1529.06	17673.3	1629.87	486620	Oxidoreductases;Acting on the aldehyde or oxo group of donors;With a disulfide as acceptor;2-oxoglutarate:[dihydrolipoyllysine-residue succinyltransferase]-lipoyllysine 2-oxidoreductase (decarboxylating, acceptor-succinylating)
1.2.7.1	21902.7	2176.51	21178.2	2240.43	21277.3	2859.97	20202.7	2951.39	33092.7	3453.34	32582.7	1553.84	899244	Oxidoreductases;Acting on the aldehyde or oxo group of donors;With an iron-sulfur protein as acceptor;pyruvate:ferredoxin 2-oxidoreductase (CoA-acetylating)
1.20.4.4	2863.33	448.662	4511.33	472.834	4264.33	787.733	3538.33	860.036	6243	963.212	7392.67	879.654	177822	Oxidoreductases;Acting on phosphorus or arsenic in donors;With disulfide as acceptor;arsenate:thioredoxin oxidoreductase
1.3.1.33	678	73.0205	1947.33	176.142	1601	336.917	2333	853.498	4185.67	581.607	4230.67	453.579	93662	Oxidoreductases;Acting on the CH-CH group of donors;With NAD+ or NADP+ as acceptor;chlorophyllide-a:NADP+ 7,8-oxidoreductase
1.3.1.34	2332	481.614	2078	221.025	3003.67	611.15	2205	396.478	4177.33	839.514	5537.67	1251.81	115240	Oxidoreductases;Acting on the CH-CH group of donors;With NAD+ or NADP+ as acceptor;(2E)-2-enoyl-CoA:NADP+ 4-oxidoreductase
1.3.3.15	2843.33	337.339	4126.89	425.392	4535.33	737.545	3428	1046.53	6974.67	701.513	7614.33	667.793	180986	Oxidoreductases;Acting on the CH-CH group of donors;With oxygen as acceptor;coproporphyrinogen-III:oxygen oxidoreductase (coproporphyrin-forming)
1.3.3.4	2843.33	337.339	4126.89	425.392	4535.33	737.545	3428	1046.53	6974.67	701.513	7614.33	667.793	180986	Oxidoreductases;Acting on the CH-CH group of donors;With oxygen as acceptor;protoporphyrinogen-IX:oxygen oxidoreductase
1.3.99.26	4072	412.233	4814.44	534.355	6314.33	1225.52	4609	1129.04	8213	771.2	8104.67	776.686	218992	Oxidoreductases;Acting on the CH-CH group of donors;With unknown physiological acceptors;all-trans-zeta-carotene:acceptor oxidoreductase
1.3.99.28	4072	412.233	4814.44	534.355	6314.33	1225.52	4609	1129.04	8213	771.2	8104.67	776.686	218992	Oxidoreductases;Acting on the CH-CH group of donors;With unknown physiological acceptors;15-cis-phytoene:acceptor oxidoreductase (neurosporene-forming)
1.3.99.29	4072	412.233	4814.44	534.355	6314.33	1225.52	4609	1129.04	8213	771.2	8104.67	776.686	218992	Oxidoreductases;Acting on the CH-CH group of donors;With unknown physiological acceptors;15-cis-phytoene:acceptor oxidoreductase (zeta-carotene-forming)
1.3.99.31	4072	412.233	4814.44	534.355	6314.33	1225.52	4609	1129.04	8213	771.2	8104.67	776.686	218992	Oxidoreductases;Acting on the CH-CH group of donors;With unknown physiological acceptors;15-cis-phytoene:acceptor oxidoreductase (lycopene-forming)
1.4.1.13	25540.7	3079.86	31522.4	2374.04	28160	5347.05	23234.3	3499.61	39816.3	3395.7	41202.3	3306.32	1154802	Oxidoreductases;Acting on the CH-NH2 group of donors;With NAD+ or NADP+ as acceptor;L-glutamate:NADP+ oxidoreductase (transaminating)
1.4.1.2	8635.33	1204.95	10111.8	787.618	9478.33	1489.56	8965.33	1500.64	12101.3	1312.6	14036.7	1032.63	384402	Oxidoreductases;Acting on the CH-NH2 group of donors;With NAD+ or NADP+ as acceptor;L-glutamate:NAD+ oxidoreductase (deaminating)
1.5.1.7	3667.33	347.254	2719.78	368.461	3920	762.483	2395	588.153	4898.33	920.664	5389.67	382.347	135098	Oxidoreductases;Acting on the CH-NH group of donors;With NAD+ or NADP+ as acceptor;N6-(L-1,3-dicarboxypropyl)-L-lysine:NAD+ oxidoreductase (L-lysine-forming)
1.5.8.1	2076	502.581	1974	167.994	1763	480.518	1329.33	562.576	1132.67	167.373	3428	413.328	69912	Oxidoreductases;Acting on the CH-NH group of donors;With a flavin or flavoprotein as acceptor;dimethylamine:electron-transfer flavoprotein oxidoreductase
1.5.8.2	2076	502.581	1974	167.994	1763	480.518	1329.33	562.576	1132.67	167.373	3428	413.328	69912	Oxidoreductases;Acting on the CH-NH group of donors;With a flavin or flavoprotein as acceptor;trimethylamine:electron-transfer flavoprotein oxidoreductase (demethylating)
1.6.5.2	4398.67	630.068	6962.22	631.091	6529	1023.67	5655	1493.28	9629.33	898.218	10231.7	1249.87	268126	Oxidoreductases;Acting on NADH or NADPH;With a quinone or similar compound as acceptor;NAD(P)H:quinone oxidoreductase
1.7.5.1	10437.3	1351.17	10953.8	1612.89	8843.33	1462.45	3753.67	538.804	5019	858.46	16318	1412.18	333500	Oxidoreductases;Acting on other nitrogenous compounds as donors;With a quinone or similar compound as acceptor;nitrite:quinone oxidoreductase
1.8.1.18	1130	132.605	2031.33	360.798	1653.67	261.226	2420	756.897	5580	1272.91	5045.33	620.731	109866	Oxidoreductases;Acting on a sulfur group of donors;With NAD+ or NADP+ as acceptor;hydrogen sulfide:NAD(P)+ oxidoreductase (CoA-dependent)
2.1.1.107	3907.33	346.758	6703.56	536.701	5184.33	719.533	4094	617.38	6838.67	693.298	8370.33	1139.66	218978	Transferases;Transferring one-carbon groups;Methyltransferases;S-adenosyl-L-methionine:uroporphyrinogen-III C-methyltransferase
2.1.1.72	6967.33	566.471	9054.44	739.557	13271.3	2913.82	6399.33	831.713	14442	1265.01	16077.7	2246.5	403534	Transferases;Transferring one-carbon groups;Methyltransferases;S-adenosyl-L-methionine:adenine in DNA N6-methyltransferase
2.2.1.5	2296	183.989	4307.33	347.089	3502	732.153	3761.33	1047.96	5858	788.39	9398	1061.06	180770	Transferases;Transferring aldehyde or ketonic groups;Transketolases and transaldolases;2-oxoglutarate:glyoxylate succinaldehydetransferase (decarboxylating)
2.2.1.7	5559.33	520.409	6543.78	485.923	6828.33	1388.51	5752	952.046	9333.67	717.553	9711.67	924.755	265326	Transferases;Transferring aldehyde or ketonic groups;Transketolases and transaldolases;pyruvate:D-glyceraldehyde-3-phosphate acetaldehydetransferase (decarboxylating)
2.2.1.9	2050	342.859	2114.22	145.947	2986	672.904	2586.33	851.263	4828	492.978	5557.33	634.385	120924	Transferases;Transferring aldehyde or ketonic groups;Transketolases and transaldolases;isochorismate:2-oxoglutarate 4-oxopentanoatetransferase (decarboxylating)
2.3.1.1	5650.67	812.459	8194.44	668.355	7061	1039.02	5902.67	1037.09	11325.3	1065.74	11219	1100.57	303750	Transferases;Acyltransferases;Transferring groups other than aminoacyl groups;acetyl-CoA:L-glutamate N-acetyltransferase
2.3.1.12	10102.7	1555.56	14613.1	1461.94	14176.7	2717.09	9625.67	1870.58	17456	1970.41	18172.3	2018.45	518410	Transferases;Acyltransferases;Transferring groups other than aminoacyl groups;acetyl-CoA:enzyme N6-(dihydrolipoyl)lysine S-acetyltransferase
2.3.1.189	3526.67	437.357	4342.89	491.45	5713.33	1234.98	3336	1113.51	6412	743.454	8753	928.004	194952	Transferases;Acyltransferases;Transferring groups other than aminoacyl groups;acetyl-CoA:desacetylmycothiol O-acetyltransferase
2.3.1.20	10919.3	1810.62	13804.9	1026.35	13327.3	3364.16	13316	4519.77	25133	2805.84	33247.7	2873.45	667146	Transferases;Acyltransferases;Transferring groups other than aminoacyl groups;acyl-CoA:1,2-diacyl-sn-glycerol O-acyltransferase
2.3.1.51	14721.3	2401.62	15346.7	1485.08	15896	2422.57	13973.3	3561.64	24411	2356.34	24997	2472.62	657948	Transferases;Acyltransferases;Transferring groups other than aminoacyl groups;acyl-CoA:1-acyl-sn-glycerol-3-phosphate 2-O-acyltransferase
2.3.1.54	269.333	136.299	778.444	220.22	431.667	153.438	971	506.034	1213.67	151.802	3379	463.713	43786	Transferases;Acyltransferases;Transferring groups other than aminoacyl groups;acetyl-CoA:formate C-acetyltransferase
2.3.1.61	6624	953.165	8349.56	612.397	8553	1275.61	7105.33	1294.54	11348.7	1148.41	13642	1366.61	338912	Transferases;Acyltransferases;Transferring groups other than aminoacyl groups;succinyl-CoA:enzyme-N6-(dihydrolipoyl)lysine S-succinyltransferase
2.3.1.75	10763.3	1811.6	13002.2	969.318	13054.7	3384.17	13012.3	4445.69	24401.3	2763.97	32259	2722.4	645674	Transferases;Acyltransferases;Transferring groups other than aminoacyl groups;acyl-CoA:long-chain-alcohol O-acyltransferase
2.3.1.8	2774.67	399.932	3639.33	481.757	3807.33	726.556	3872.33	786.959	8130.67	836.461	7133.67	853.134	178742	Transferases;Acyltransferases;Transferring groups other than aminoacyl groups;acetyl-CoA:phosphate acetyltransferase
2.3.3.13	9815.33	997.866	14935.1	1234.03	12258	2290.81	10670.7	1525.73	15650	1712.99	16660.3	1428.56	495296	Transferases;Acyltransferases;Acyl groups converted into alkyl groups on transfer;acetyl-CoA:3-methyl-2-oxobutanoate C-acetyltransferase (thioester-hydrolysing, carboxymethyl-forming)
2.4.1.109	790	97.1391	1610.89	257.362	1197	296.037	973.333	393.46	1988.67	192.352	3388	440.694	62150	Transferases;Glycosyltransferases;Hexosyltransferases;dolichyl beta-D-mannosyl-phosphate:L-threonyl/L-seryl-[protein] O-D-mannosyltransferase (configuration-inverting)
2.4.1.129	19290	2274.95	29005.6	2519.02	24039.7	3316.63	19163.3	2801.36	34173.7	3645.62	30971.3	3525.07	969008	Transferases;Glycosyltransferases;Hexosyltransferases;[poly-N-acetyl-D-glucosaminyl-(1->4)-(N-acetyl-D-muramoylpentapeptide)]-diphosphoundecaprenol:[N-acetyl-D-glucosaminyl-(1->4)-N-acetyl-D-muramoylpentapeptide]-diphosphoundecaprenol disaccharidetransferase
2.4.1.18	8557.33	1223.95	12448.7	1060.56	11194.3	1833.42	10186.3	2060.61	17451	1341.8	16204.3	1105.23	467926	Transferases;Glycosyltransferases;Hexosyltransferases;(1->4)-alpha-D-glucan:(1->4)-alpha-D-glucan 6-alpha-D-[(1->4)-alpha-D-glucano]-transferase
2.4.1.20	2200.67	259.633	2644	367.992	2926.67	454.763	2245	942.269	5167	632.712	5462.67	435.112	125206	Transferases;Glycosyltransferases;Hexosyltransferases;cellobiose:phosphate alpha-D-glucosyltransferase
2.4.1.25	6081.33	960.144	8684.89	872.927	7302.67	1206.66	5859.33	1131.03	11406.3	1176.2	10837	830.362	308840	Transferases;Glycosyltransferases;Hexosyltransferases;(1->4)-alpha-D-glucan:(1->4)-alpha-D-glucan 4-alpha-D-glycosyltransferase
2.4.1.250	3672	616.114	6377.56	662.169	6009.33	1164.31	4620	1382.39	9080	986.747	7899	685.155	234064	Transferases;Glycosyltransferases;Hexosyltransferases;UDP-N-acetyl-alpha-D-glucosamine:1D-myo-inositol 3-phosphate alpha-D-glycosyltransferase (configuration-retaining)
2.4.1.342	2406.67	313.594	4814.44	533.115	3978.33	725.266	2837.33	744.296	5163	559.332	5610	504.555	156082	Transferases;Glycosyltransferases;Hexosyltransferases;ADP-alpha-D-glucose:alpha-D-glucose-1-phosphate 4-alpha-D-glucosyltransferase (configuration-retaining)
2.4.1.346	2381.33	421.029	4317.33	397.746	3713.33	862.955	3381	707.395	6258.33	678.571	6515.67	533.781	165210	Transferases;Glycosyltransferases;Hexosyltransferases;GDP-alpha-D-mannose:2-O-alpha-D-mannosyl-1-phosphatidyl-1D-myo-inositol 6-alpha-D-mannosyltransferase (configuration-retaining)
2.5.1.26	1807.33	272.979	3298.22	239.936	3354	642.531	2189.33	686.496	4301.67	713.573	5027.67	382.475	124342	Transferases;Transferring alkyl or aryl groups, other than methyl groups;Transferring alkyl or aryl groups, other than methyl groups (only sub-subclass identified to date);1-acyl-glycerone-3-phosphate:long-chain-alcohol O-3-phospho-2-oxopropanyltransferase
2.6.1.17	6834.67	1099.42	8232.44	632.243	8251	1317.71	6324	1278.14	10188	1017.17	10926.7	1055.31	308734	Transferases;Transferring nitrogenous groups;Transaminases;N-succinyl-L-2,6-diaminoheptanedioate:2-oxoglutarate aminotransferase
2.6.1.85	2794	312.864	4836	375.105	4231.67	636.808	3043.67	766.662	5610	550.823	7380.67	997.612	173502	Transferases;Transferring nitrogenous groups;Transaminases;chorismate:L-glutamine aminotransferase
2.7.1.107	6970.67	858.895	10890.2	828.897	9649.67	1905.55	7931	1947.55	14388	1909.63	13793	1464.43	393494	Transferases;Transferring phosphorus-containing groups;Phosphotransferases with an alcohol group as acceptor;ATP:1,2-diacyl-sn-glycerol 3-phosphotransferase
2.7.1.63	1492.67	110.46	2018.89	112.748	2076	447.816	1844.67	673.8	2866.33	360.722	4271	368.46	88996	Transferases;Transferring phosphorus-containing groups;Phosphotransferases with an alcohol group as acceptor;polyphosphate:D-glucose 6-phosphotransferase
2.7.4.1	7873.33	1048.65	10811.8	789.968	10888	2260.22	8327.33	1525.65	13384.7	1323.62	13598.7	1727.24	398118	Transferases;Transferring phosphorus-containing groups;Phosphotransferases with a phosphate group as acceptor;ATP:polyphosphate phosphotransferase
2.7.4.33	4982.67	825.071	6108.67	638.938	5226	964.66	4675.33	853.512	8200.67	986.75	9309.67	991.647	234396	Transferases;Transferring phosphorus-containing groups;Phosphotransferases with a phosphate group as acceptor;ADP:polyphosphate phosphotransferase
2.7.4.34	5328	821.338	6569.56	526.152	6667.33	1465.78	6427	1359.93	11175.3	1440.43	11774	920.568	291372	Transferases;Transferring phosphorus-containing groups;Phosphotransferases with a phosphate group as acceptor;GTP:polyphosphate phosphotransferase
2.7.7.101	7026.67	871.838	8830.44	838.069	8881.67	1489.94	6822.67	1105.44	12945.3	2024.05	12393.3	1386.29	346812	Transferases;Transferring phosphorus-containing groups;Nucleotidyltransferases;nucleotide 5'-triphosphate:single-stranded DNA nucleotidyltransferase (DNA-RNA hybrid synthesizing)
2.7.7.42	6156	784.727	7966.22	697.46	6483.67	1132.92	5533	819.881	9063.33	918.755	10002.7	920.625	276660	Transferases;Transferring phosphorus-containing groups;Nucleotidyltransferases;ATP:[glutamine synthetase]-L-tyrosine adenylyltransferase
2.7.7.65	25223.3	2407.53	37371.1	3678.91	30739.7	4465.17	25856.7	4962.14	38051.3	4064.36	41363	7059.83	1228074	Transferases;Transferring phosphorus-containing groups;Nucleotidyltransferases;GTP:GTP guanylyltransferase (cyclizing)
2.7.7.7	77567.3	10498.9	92725.6	7107.17	93027.7	14943.3	73382	11470.6	119768	12338.6	117334	9883.08	3488306	Transferases;Transferring phosphorus-containing groups;Nucleotidyltransferases;2'-deoxyribonucleoside-5'-triphosphate:DNA deoxynucleotidyltransferase (DNA-directed)
2.7.7.87	3692	623.23	4030	405.111	5001.67	978.597	4000.67	921.327	7758.33	1010.77	7745.33	833.67	194382	Transferases;Transferring phosphorus-containing groups;Nucleotidyltransferases;ATP:L-threonyl,HCO3- adenylyltransferase
2.7.7.89	6156	784.727	7966.22	697.46	6483.67	1132.92	5533	819.881	9063.33	918.755	10002.7	920.625	276660	Transferases;Transferring phosphorus-containing groups;Nucleotidyltransferases;[glutamine synthetase]-O4-(5'-adenylyl)-L-tyrosine:phosphate adenylyltransferase
2.7.8.12	793.333	151.054	960.444	105.085	1072.33	163.543	801.333	214.116	2352.33	273.444	4827.33	671.813	65344	Transferases;Transferring phosphorus-containing groups;Transferases for other substituted phosphate groups;CDP-glycerol:4-O-[(2R)-glycerophospho]-N-acetyl-beta-D-mannosaminyl-(1->4)-N-acetyl-alpha-D-glucosaminyl-diphospho-ditrans,octacis-undecaprenol glycerophosphotransferase
2.7.8.5	4012	578.457	5063.33	366.137	4368.33	913.553	4039	820.448	7438.33	798.654	7366.33	762.03	196878	Transferases;Transferring phosphorus-containing groups;Transferases for other substituted phosphate groups;CDP-diacylglycerol:sn-glycerol-3-phosphate 1-(3-sn-phosphatidyl)transferase
2.8.4.4	4372	580.383	4860.44	528.3	6151.33	1036.46	3987	818.624	7996.33	990.073	7233	607.397	209066	Transferases;Transferring sulfur-containing groups;Transferring alkylthio groups;[ribosomal protein S12]-L-aspartate89:sulfur-(sulfur carrier),S-adenosyl-L-methionine C3-(methylsulfanyl)transferase
3.1.1.24	9682	1709.13	18537.8	1643.06	13442.3	3351.56	10897	2438.84	20355.7	2339.81	19621.3	2240.46	581784	Hydrolases;Acting on ester bonds;Carboxylic-ester hydrolases;4-carboxymethylbut-3-en-4-olide enol-lactonohydrolase
3.1.1.3	4712.67	728.462	5996.44	561.79	6862	1361.05	7026.33	1826.96	11865.3	1015.55	13523.3	1647.78	303768	Hydrolases;Acting on ester bonds;Carboxylic-ester hydrolases;triacylglycerol acylhydrolase
3.1.11.2	4965.33	795.579	5760	475.666	5807.67	1110.76	4751	1031.61	7757	900.579	8308	657.44	226478	Hydrolases;Acting on ester bonds;Exodeoxyribonucleases producing 5'-phosphomonoesters;exodeoxyribonuclease III
3.1.11.5	5365.33	405.272	10748	1335.34	9852.67	868.87	9471.67	1750.52	18836	2334.07	17540.7	2972.65	447034	Hydrolases;Acting on ester bonds;Exodeoxyribonucleases producing 5'-phosphomonoesters;exodeoxyribonuclease V
3.1.21.3	3014.67	579.228	3264.67	427.706	7279	2389.82	2815	736.498	8981.33	674.654	11806.7	2447.83	223718	Hydrolases;Acting on ester bonds;Endodeoxyribonucleases producing 5'-phosphomonoesters;type I site-specific deoxyribonuclease
3.1.26.12	6178	967.578	7008.67	479.823	6712.67	1393.5	6108	1067.41	8722.33	933.257	10999.3	1327.77	276866	Hydrolases;Acting on ester bonds;Endoribonucleases producing 5'-phosphomonoesters;ribonuclease E
3.1.26.4	6073.33	867.293	7812.44	709.44	7763.33	1387.22	5912.33	1094.96	10969.3	1342.01	10554.7	1393.1	299730	Hydrolases;Acting on ester bonds;Endoribonucleases producing 5'-phosphomonoesters;ribonuclease H
3.1.3.100	4520.67	735.677	4272.22	448.605	5843	1262.48	3607.33	763.746	7944	1082.02	7254	660.287	199902	Hydrolases;Acting on ester bonds;Phosphoric-monoester hydrolases;thiamine phosphate phosphohydrolase
3.1.3.104	1815.33	277.808	2232.89	266.966	2506.33	620.363	2091.67	583.489	4123.33	476.503	5049	638.381	108164	Hydrolases;Acting on ester bonds;Phosphoric-monoester hydrolases;5-amino-6-(5-phospho-D-ribitylamino)uracil phosphohydrolase
3.1.3.21	1178	158.758	1906.89	153.229	1602	436.116	1569	535.467	2577.67	304.981	4553.33	519.358	82508	Hydrolases;Acting on ester bonds;Phosphoric-monoester hydrolases;glycerol-1-phosphate phosphohydrolase
3.1.3.48	3838	568.398	5492.22	378.149	5466.67	1017.19	4378	1018.35	8150.33	984.009	8901.33	970.786	222322	Hydrolases;Acting on ester bonds;Phosphoric-monoester hydrolases;protein-tyrosine-phosphate phosphohydrolase
3.1.3.73	1423.33	215.131	2383.56	219.697	2132.33	500.133	1991	652.932	3963	425.407	4716.67	560.673	102540	Hydrolases;Acting on ester bonds;Phosphoric-monoester hydrolases;adenosylcobalamin/alpha-ribazole-5'-phosphate phosphohydrolase
3.1.31.1	2593.33	488.034	4763.78	481.932	3989.67	842.736	3130.33	696.164	5985.67	726.166	6580.67	592.875	168772	Hydrolases;Acting on ester bonds;Endoribonucleases that are active with either ribo- or deoxyribonucleic acids and produce 3'-phosphomonoesters;micrococcal nuclease
3.1.6.12	4522.67	576.251	7158.22	697.338	7825	2017.28	5249	1275.58	9706	955.14	9210.67	549.888	269936	Hydrolases;Acting on ester bonds;Sulfuric-ester hydrolases;N-acetyl-D-galactosamine-4-sulfate 4-sulfohydrolase
3.2.1.1	7577.33	799.836	13848	1286.88	13808	2020.07	9446.67	2107.92	16706	2097.33	18796.7	1743.23	499908	Hydrolases;Glycosylases;Glycosidases, i.e. enzymes that hydrolyse O- and S-glycosyl compounds;4-alpha-D-glucan glucanohydrolase
3.2.1.20	5199.33	639.429	7802	998.383	9451.67	1960.28	6744	2248.91	13301	1377.92	12598.7	1360.52	338388	Hydrolases;Glycosylases;Glycosidases, i.e. enzymes that hydrolyse O- and S-glycosyl compounds;alpha-D-glucoside glucohydrolase
3.2.1.41	2548	391.648	4442	586.124	7416.67	1831.23	5070.67	1315.37	8423	706.524	9761.67	806.297	231654	Hydrolases;Glycosylases;Glycosidases, i.e. enzymes that hydrolyse O- and S-glycosyl compounds;pullulan 6-alpha-glucanohydrolase
3.2.1.68	7244.67	850.516	11866.7	1050.29	10217.3	2190.9	9168.33	2255.96	15659	1507.95	19696	1671.39	456978	Hydrolases;Glycosylases;Glycosidases, i.e. enzymes that hydrolyse O- and S-glycosyl compounds;glycogen 6-alpha-D-glucanohydrolase
3.4.11.1	6898.67	856.575	8378.22	771.582	8521.33	1674.13	7175.67	961.262	10619.3	1084.63	11404	724.705	322422	Hydrolases;Acting on peptide bonds (peptidases);Aminopeptidases;leucyl aminopeptidase
3.4.11.18	4239.33	575.64	5241.11	280.965	5244.67	812.174	4158.33	748.571	7038	817.473	7730.33	929.143	204916	Hydrolases;Acting on peptide bonds (peptidases);Aminopeptidases;methionyl aminopeptidase
3.4.11.2	10651.3	1507.34	12422	1252.13	12479	1813.72	10640	1458.27	20602.7	1672.31	18820.3	1495.09	519004	Hydrolases;Acting on peptide bonds (peptidases);Aminopeptidases;membrane alanyl aminopeptidase
3.4.13.23	4946	966.865	5998.89	510.551	5673	1077.97	3669.67	628.865	5500.67	771.192	7515	595.02	202978	Hydrolases;Acting on peptide bonds (peptidases);Dipeptidases;cysteinylglycine-S-conjugate dipeptide hydrolase
3.4.16.4	53949.3	7826.71	73904.2	6243.56	68391.3	11600.5	51929.3	9478.9	97460	9388.32	84459.7	7710.49	2640428	Hydrolases;Acting on peptide bonds (peptidases);Serine-type carboxypeptidases;serine-type D-Ala-D-Ala carboxypeptidase
3.4.24.40	5300	914	7088.44	840.538	8050.33	1826.4	5595.67	2230.14	6929.67	597.104	9822.33	817.98	262084	Hydrolases;Acting on peptide bonds (peptidases);Metalloendopeptidases;serralysin
3.4.25.1	1322.67	208.714	1940.22	171.667	1455.33	324.088	1678.33	396.627	2140.67	287.618	3966	361.506	76872	Hydrolases;Acting on peptide bonds (peptidases);Threonine endopeptidases;proteasome endopeptidase complex
3.5.1.104	5969.33	1018.75	8315.11	1047.16	8126.33	1615.97	4380.33	597.321	9214	1127.45	10175.7	1048.14	284122	Hydrolases;Acting on carbon-nitrogen bonds, other than peptide bonds;In linear amides;peptidoglycan-N-acetylglucosamine amidohydrolase
3.5.1.2	3020	469.438	5726	543.823	4423.33	876.765	4554.67	754.684	7446.33	805.943	7420.33	619.509	203662	Hydrolases;Acting on carbon-nitrogen bonds, other than peptide bonds;In linear amides;L-glutamine amidohydrolase
3.5.1.4	8710	1461.49	15935.6	1370.63	12090.7	2549.52	11310.3	1984.6	19128.7	1703.24	18234.3	1728.48	534134	Hydrolases;Acting on carbon-nitrogen bonds, other than peptide bonds;In linear amides;acylamide amidohydrolase
3.5.1.81	17293.3	3015.69	21419.1	1959	19843.3	4123.35	19922	3181.39	31886.3	2938.72	32475.7	908.37	869416	Hydrolases;Acting on carbon-nitrogen bonds, other than peptide bonds;In linear amides;N-acyl-D-amino acid amidohydrolase
3.5.3.6	2412	411.14	1805.56	183.937	2978.33	568.762	1869	547.201	3900	364.725	5015.33	600.209	106062	Hydrolases;Acting on carbon-nitrogen bonds, other than peptide bonds;In linear amidines;L-arginine iminohydrolase
3.6.1.27	5514.67	619.226	8152.89	798.427	7680.33	1251.41	5350.67	1203.39	11075	1168.53	11400.3	1634.48	302958	Hydrolases;Acting on acid anhydrides;In phosphorus-containing anhydrides;ditrans,octacis-undecaprenyl-diphosphate phosphohydrolase
3.6.1.55	8410.67	862.323	12605.6	1232.96	12990.3	2103.12	9431	2181.97	18043.7	1985.6	17866	2020.95	488668	Hydrolases;Acting on acid anhydrides;In phosphorus-containing anhydrides;8-oxo-dGTP diphosphohydrolase
3.6.4.13	29469.3	3747.56	39831.8	3233.73	39038.7	6414.02	33060.3	6352.23	55077.7	5206.6	56872.3	5095.26	1551188	Hydrolases;Acting on acid anhydrides;Acting on acid anhydrides to facilitate cellular and subcellular movement;ATP phosphohydrolase (RNA helix unwinding)
4.1.1.15	738	292.554	2598.67	164.384	1461	295.274	2204	453.114	4307	446.855	4041.67	223.533	97684	Lyases;Carbon-carbon lyases;Carboxy-lyases;L-glutamate 1-carboxy-lyase (4-aminobutanoate-forming)
4.1.1.31	6624	888.547	8303.11	727.232	8974.67	1650.09	7455.67	1564.58	11615.7	1108.51	11943.3	983.105	334536	Lyases;Carbon-carbon lyases;Carboxy-lyases;phosphate:oxaloacetate carboxy-lyase (adding phosphate, phosphoenolpyruvate-forming)
4.1.1.32	4020	644.183	5313.33	514.551	4675	857.112	4437.67	867.479	7328.33	671.795	8026.67	962.413	206686	Lyases;Carbon-carbon lyases;Carboxy-lyases;GTP:oxaloacetate carboxy-lyase (adding GTP; phosphoenolpyruvate-forming)
4.1.1.38	772.667	220.457	1032	175.168	822	139.393	574.667	182.484	1618.33	348.72	3181.67	311.657	48786	Lyases;Carbon-carbon lyases;Carboxy-lyases;diphosphate:oxaloacetate carboxy-lyase (transphosphorylating; phosphoenolpyruvate-forming)
4.1.1.71	2296	183.989	4307.33	347.089	3502	732.153	3761.33	1047.96	5858	788.39	9398	1061.06	180770	Lyases;Carbon-carbon lyases;Carboxy-lyases;2-oxoglutarate carboxy-lyase (succinate-semialdehyde-forming)
4.1.2.13	8008.67	912.742	9901.78	1096.08	9711.67	1489.83	7414	1146.91	12884.3	1401.8	13330	1190.95	373182	Lyases;Carbon-carbon lyases;Aldehyde-lyases;D-fructose-1,6-bisphosphate D-glyceraldehyde-3-phosphate-lyase (glycerone-phosphate-forming)
4.1.2.27	1714	190	2469.78	292.483	2799.33	528.268	3000	1080.16	4452	418.062	6219.33	533.879	126194	Lyases;Carbon-carbon lyases;Aldehyde-lyases;sphinganine-1-phosphate palmitaldehyde-lyase (phosphoethanolamine-forming)
4.2.1.17	16480	2356.9	25207.3	2069.32	19109.7	3185.5	18237	2588.72	29551.7	3623.15	28037.7	3084.35	845922	Lyases;Carbon-oxygen lyases;Hydro-lyases;(3S)-3-hydroxyacyl-CoA hydro-lyase
4.2.1.20	9902	1234.78	12752.4	1155.79	12666	2009.05	9621.67	1503.04	18053.3	2449.01	17064	1872.86	488908	Lyases;Carbon-oxygen lyases;Hydro-lyases;L-serine hydro-lyase [adding 1-C-(indol-3-yl)glycerol 3-phosphate, L-tryptophan and D-glyceraldehyde-3-phosphate-forming]
4.2.99.18	9344	1600.59	12609.1	979.005	11990	2177.89	10662	1976.03	18453	2092.14	17047.7	1741.63	490430	Lyases;Carbon-oxygen lyases;Other carbon-oxygen lyases;DNA-(apurinic or apyrimidinic site) 5'-phosphomonoester-lyase
5.1.2.3	6180	787.429	6234.44	622.987	7026	1237.1	6282	1144.27	8352.67	903.674	11150.7	1270.99	271518	Isomerases;Racemases and epimerases;Acting on hydroxy acids and derivatives;3-hydroxybutanoyl-CoA 3-epimerase
5.4.2.8	7890	846.255	11028.9	869.112	9885.33	1535.53	8198.67	1542.12	14980	1082.98	16207.7	1769.99	418560	Isomerases;Intramolecular transferases;Phosphotransferases (phosphomutases);alpha-D-mannose 1,6-phosphomutase
5.4.3.8	9310	1083.01	10873.1	955.295	11022.7	1971.52	7591.67	1077.53	11763.3	1233.89	14205.7	1175.22	393288	Isomerases;Intramolecular transferases;Transferring amino groups;(S)-4-amino-5-oxopentanoate 4,5-aminomutase
5.4.4.2	1643.33	196.554	1858	143.217	2434	586.072	2273.67	634.67	4152	425.52	4310	495.529	100670	Isomerases;Intramolecular transferases;Transferring hydroxy groups;isochorismate hydroxymutase
5.4.99.63	1661.33	266.386	3262.67	281.645	2536.67	494.505	2769.33	569.663	3777	523.534	6009.67	692.024	124904	Isomerases;Intramolecular transferases;Transferring other groups;(2R)-ethylmalonyl-CoA CoA-carbonylmutase
5.5.1.24	497.333	29.1433	328.444	64.4731	993	188.683	1026.33	417.921	1925.67	265.771	2672.67	328.216	44154	Isomerases;Intramolecular lyases;Intramolecular lyases (only sub-subclass identified to date);delta/gamma-tocopherol lyase (ring-opening)
5.6.2.2	35511.3	4554.68	42968.4	3236.21	43323.3	6495.17	32995.3	4450.84	48881.3	5238.84	52715.7	5147.42	1560744	Isomerases;Isomerases altering macromolecular conformation;Enzymes altering nucleic acid conformation;DNA topoisomerase (ATP-hydrolysing)
5.6.2.3	14364.7	1790.62	17215.6	1341.41	19624.7	3428.77	14626.7	2252.55	24079	2313.41	24101	2102.32	692622	Isomerases;Isomerases altering macromolecular conformation;Enzymes altering nucleic acid conformation;DNA 5'-3' helicase (ATP-hydrolysing)
5.6.2.4	78071.3	10230.6	106798	8280.99	107535	17071.3	83283.7	14261	145158	16818.3	137146	11792.1	4034132	Isomerases;Isomerases altering macromolecular conformation;Enzymes altering nucleic acid conformation;DNA 3'-5' helicase (ATP-hydrolysing)
6.1.1.6	7822.67	951.767	9665.56	884.224	9372.33	1484.1	7296.33	1102.26	12035.3	1403.66	13114.7	1360.79	361370	Ligases;Forming carbon-oxygen bonds;Ligases forming aminoacyl-tRNA and related compounds;L-lysine:tRNALys ligase (AMP-forming)
6.2.1.1	15818.7	2280.12	20016	1603.21	19634.3	3395.65	14452	2339.26	20678.3	2282.95	26219	2709.75	713502	Ligases;Forming carbon-sulfur bonds;Acid-thiol ligases;acetate:CoA ligase (AMP-forming)
6.2.1.26	1938	352.641	1577.78	106.36	2318	595.018	1870.33	628.083	3597.33	333.49	4352	466.323	92840	Ligases;Forming carbon-sulfur bonds;Acid-thiol ligases;2-succinylbenzoate:CoA ligase (AMP-forming)
6.3.1.13	480.667	162.004	1420.89	105.585	1154	347.241	1043.67	387.301	1642.33	225.358	2836.33	341.679	54288	Ligases;Forming carbon-nitrogen bonds;Acid-D-ammonia (or amine) ligases (amide synthases);L-cysteine:1-O-(2-amino-2-deoxy-alpha-D-glucopyranosyl)-1D-myo-inositol ligase (AMP-forming)
6.3.2.2	11275.3	1816.07	16028	1365.59	13559.7	3096.49	12336	2344.02	19963.3	2040	19245.7	1610.71	568706	Ligases;Forming carbon-nitrogen bonds;Acid-D-amino-acid ligases (peptide synthases);L-glutamate:L-cysteine gamma-ligase (ADP-forming)
6.3.2.29	3073.33	453.508	3741.33	391.724	4170	862.571	3650.33	908.528	5225	554.452	6550	404.627	160464	Ligases;Forming carbon-nitrogen bonds;Acid-D-amino-acid ligases (peptide synthases);cyanophycin:L-aspartate ligase (ADP-forming)
6.3.2.30	3073.33	453.508	3741.33	391.724	4170	862.571	3650.33	908.528	5225	554.452	6550	404.627	160464	Ligases;Forming carbon-nitrogen bonds;Acid-D-amino-acid ligases (peptide synthases);cyanophycin:L-arginine ligase (ADP-forming)
6.3.4.14	7667.33	1109.17	10643.1	1021.09	9719.33	1419.04	7467.67	1265.17	12816	1572.68	14011.7	1462.91	382878	Ligases;Forming carbon-nitrogen bonds;Other carbon-nitrogen ligases;[biotin carboxyl-carrier protein]-biotin-N6-L-lysine:hydrogencarbonate ligase (ADP-forming)
6.3.4.18	2919.33	459.027	3020.22	250.57	3606	854.29	3181	776.745	4815.67	543.39	5324	615.162	137500	Ligases;Forming carbon-nitrogen bonds;Other carbon-nitrogen ligases;5-amino-1-(5-phospho-D-ribosyl)imidazole:carbon-dioxide ligase (ADP-forming)
6.3.5.13	394.667	49.1664	988.889	139	740.333	180.499	1080	450.207	1537.67	216.194	3655.67	506.397	52166	Ligases;Forming carbon-nitrogen bonds;Carbon-nitrogen ligases with glutamine as amido-N-donor;beta-D-GlcNAc-(1->4)-Mur2Ac(oyl-L-Ala-gamma-D-Glu-L-Lys-D-Ala-D-Ala)-diphospho-ditrans,octacis-undecaprenol:L-glutamine amidoligase (ADP-forming)
6.3.5.2	10755.3	1314.89	13082.9	1025.22	12162.7	1991.2	9943.33	1029.22	15561	1696.38	15856	1815.13	471150	Ligases;Forming carbon-nitrogen bonds;Carbon-nitrogen ligases with glutamine as amido-N-donor;xanthosine-5'-phosphate:L-glutamine amido-ligase (AMP-forming)
6.3.5.3	12883.3	1471.91	16062.9	1291.81	15987.7	2450.23	12409	1756.17	21381.7	2314.47	19999.3	1977.41	601882	Ligases;Forming carbon-nitrogen bonds;Carbon-nitrogen ligases with glutamine as amido-N-donor;N2-formyl-N1-(5-phospho-D-ribosyl)glycinamide:L-glutamine amido-ligase (ADP-forming)
6.4.1.2	12964.7	1791.62	17180.7	1794.28	15526	2416.37	12383	2021.8	19971.7	2370.57	20145	2031.63	601674	Ligases;Forming carbon-carbon bonds;Ligases that form carbon-carbon bonds (only sub-subclass identified to date);acetyl-CoA:hydrogencarbonate ligase (ADP-forming)
6.4.1.3	12796	1687.99	15792.2	1113.17	13152.3	2492.83	11950.7	2200.14	17492.3	1746.98	22465.3	1982.39	570882	Ligases;Forming carbon-carbon bonds;Ligases that form carbon-carbon bonds (only sub-subclass identified to date);propanoyl-CoA:carbon-dioxide ligase (ADP-forming)
6.5.1.1	5660.67	691.209	14437.8	1418.96	11427.7	2241.88	9433	1898.75	15689.3	1816.08	15407.7	1314.9	458668	Ligases;Forming phosphoric-ester bonds;Ligases that form phosphoric-ester bonds (only sub-subclass identified to date);poly(deoxyribonucleotide)-3'-hydroxyl:5'-phospho-poly(deoxyribonucleotide) ligase (ATP)
7.2.2.10	19212	2233.82	21286.9	1690.86	28946.3	5614.88	19393	4706.19	30273	3035.3	37658	3002.21	946840	Translocases;Catalysing the translocation of inorganic cations;Linked to the hydrolysis of a nucleoside triphosphate;ATP phosphohydrolase (P-type, Ca2+-transporting)
7.3.2.7	2791.33	475.539	4054.67	255.045	4093	940.195	3484	1134.2	6532.33	786.446	6818.67	771.451	170434	Translocases;Catalysing the translocation of inorganic anions and their chelates;Linked to the hydrolysis of a nucleoside triphosphate;ATP phosphohydrolase (arsenite-exporting)
7.4.2.8	31142	3388.51	38626.7	2900.15	37324	5910.82	28692.3	3640.22	40982	4716.5	47660.3	4391.15	1369018	Translocases;Catalysing the translocation of amino acids and peptides;Linked to the hydrolysis of a nucleoside triphosphate;ATP phosphohydrolase (protein-secreting)
7.6.2.11	4265.33	932.121	5030.22	342.16	5056	1279.31	3633	558	4923	612.907	6552.33	659.147	179054	Translocases;Catalysing the translocation of other compounds;Linked to the hydrolysis of a nucleoside triphosphate;ATP phosphohydrolase (ABC-type, polyamine-importing)
