# Supplementary material for: Divergent microbial community and functional dynamics in mangrove sediments along a polycyclic aromatic hydrocarbons (PAHs) gradient in China
Source: Research Square preprint supplement (doi:10.21203/rs.3.rs-7178259/v1), 2025-09-17
Supplement: Supplementary file 6 [file 5c269769c74b11a5e83a8f70.xlsx]

## Sheet: cazy_class
#Class	Description	Total	DY_1	DY_2	DY_3	CPT_LW_1	CPT_LW_2	CPT_LW_3	CPT_MZ_1	CPT_MZ_2	CPT_MZ_3	CPT_SW_1	CPT_SW_2	CPT_SW_3	FG_SC_1	FG_SC_2	FG_SC_3	FG_WR_1	FG_WR_2	FG_WR_3	M1_1_1	M1_1_2	M1_1_3	M1_2_1	M1_2_2	M1_2_3	M2_1_1	M2_1_2	M2_1_3	M2_2_1	M2_2_2	M2_2_3	M3_1_1	M3_1_2	M3_1_3	M3_2_1	M3_2_2	M3_2_3	DY	CPT	FG	M1	M2	M3	DY	CPT	FG	M1	M2
GT	Glycosyl Transferases	12134814	270582	203594	215094	342504	293174	358402	372440	413040	369088	379038	407124	369120	420120	333898	266914	301834	320664	265440	255408	219342	269316	285670	213012	175486	456188	425866	432564	480152	419552	583054	340638	315546	316134	348366	367662	328788	229757	367103	318145	236372	466229	336189	0.357837	0.374809	0.350683	0.369753	0.355433
GH	Glycoside Hydrolases	12106280	252856	217666	206988	290536	255986	326830	327180	362504	346774	334496	354072	349104	434418	327456	272224	330220	366910	276338	227138	206138	258262	292766	186546	154134	460248	439030	449826	534876	485476	616654	368344	337530	339284	375750	394934	346786	225837	327498	334594	220831	497685	360438	0.351732	0.334373	0.368814	0.345441	0.379414
CE	Carbohydrate Esterases	4446516	106326	83216	82978	120282	103554	125486	127852	144360	123952	130960	138150	128874	159672	121246	98212	115622	116184	99102	85822	75194	94782	109574	79754	66724	164526	155568	159708	170182	166284	209882	132690	121022	121766	134618	147390	125002	90840	127052	118340	85308.3	171025	130415	0.14148	0.129719	0.130443	0.133446	0.130382
AA	Auxiliary Activities	2831810	67080	49820	51578	85030	74730	88518	88992	101848	83878	92494	97034	91054	96888	75072	62582	72736	67250	65250	56268	48262	62008	67866	55342	47566	91934	88968	92286	89574	90846	112868	86810	78630	80636	89932	99582	80598	56159.3	89286.4	73296.3	56218.7	94412.7	86031.3	0.0874661	0.0911607	0.0807926	0.0879418	0.0719762
CBM	Carbohydrate-Binding Modules	1290856	23528	21496	19172	34700	30644	38494	38796	42666	39754	36818	39508	38536	49372	38726	31624	34786	37736	29252	25556	23780	29738	32044	22126	18852	48562	44986	45004	54524	50744	64344	34850	31766	32420	34980	37002	33970	21398.7	37768.4	36916	25349.3	51360.7	34164.7	0.0333276	0.0385612	0.0406915	0.0396535	0.0391552
PL	Polysaccharide Lyases	863068	20450	16682	16852	28928	24672	29638	29632	34882	29194	32784	33900	31124	31522	25816	20526	25478	28226	23064	14660	13380	17508	17000	15558	12160	27052	23778	24140	37652	30650	41678	17278	16696	16702	17678	18336	17792	17994.7	30528.2	25772	15044.3	30825	17413.7	0.028026	0.031169	0.0284078	0.0235336	0.0234997
SLH	Cellulosome Modules	5376	88	92	72	222	152	226	242	226	274	142	176	174	208	128	98	174	172	136	100	88	84	222	176	216	144	146	166	186	180	280	58	72	48	70	84	54	84	203.778	152.667	147.667	183.667	64.3333	0.000130827	0.000208055	0.00016828	0.000230992	0.00014002
[truncated: 1 more columns]
