# Supplementary material for: Divergent microbial community and functional dynamics in mangrove sediments along a polycyclic aromatic hydrocarbons (PAHs) gradient in China
Source: Research Square preprint supplement (doi:10.21203/rs.3.rs-7178259/v1), 2025-09-17
Supplement: Supplementary file 7 [file 5d0bfdcef12bad3f8cac48da.xlsx]

## Sheet: enzyme_origin
#Enzyme	DY_1	DY_2	DY_3	CPT_LW_1	CPT_LW_2	CPT_LW_3	CPT_MZ_1	CPT_MZ_2	CPT_MZ_3	CPT_SW_1	CPT_SW_2	CPT_SW_3	FG_SC_1	FG_SC_2	FG_SC_3	FG_WR_1	FG_WR_2	FG_WR_3	M1_1_1	M1_1_2	M1_1_3	M1_2_1	M1_2_2	M1_2_3	M2_1_1	M2_1_2	M2_1_3	M2_2_1	M2_2_2	M2_2_3	M3_1_1	M3_1_2	M3_1_3	M3_2_1	M3_2_2	M3_2_3	Total	DY AVE	DY SD	CPT AVE	CPT SD	FG AVE	FG SD	M1 AVE	M1 SD	M2 AVE	M2 SD	M3 AVE	M3 SD
2.7.13.3	227716	187878	192442	280906	251792	313734	320678	347192	340768	310182	342740	315488	335802	276674	231350	269260	284066	249382	216514	181712	207708	213864	177328	143306	338846	314118	319208	400034	324860	460850	256838	241334	240614	267824	287650	253792	9924450	202679	21802.7	313720	30963.7	274422	35705.5	190072	28268.8	359653	58692.7	258009	17746.7
2.7.11.1	172138	138268	136506	293882	245146	290384	301052	347072	284016	333174	349116	305692	302380	273620	229360	197870	171118	206180	144948	129094	170204	163588	155188	128214	266202	244510	243398	308798	267978	366546	189464	178502	179866	194008	204502	190092	8302076	148971	20082.8	305504	33324	230088	49414.1	148539	17573.6	282905	47335.1	189406	9585.93
4.6.1.1	120212	83836	94726	204800	171594	201590	206208	235294	189392	205244	212388	192032	155324	118956	90794	86066	72308	88086	124912	102020	129944	110616	119848	104958	184570	179846	181212	163532	175922	220324	123974	114318	116566	117952	122018	118980	5240362	99591.3	18669.7	202060	17448	101922	30284	115383	11249.3	184234	19124.1	118968	3543.64
7.1.1.2	119948	97422	97692	110896	98916	117020	119128	130196	119410	124684	133266	124156	169340	127998	107528	121988	112964	106084	91588	80434	94974	104472	86128	72726	144196	138106	142774	138074	135828	172364	144408	133358	134102	153116	162400	137032	4404716	105021	12928.2	119741	10343.9	124317	23618.8	88387	11189.1	145224	13665.4	144069	11675.4
5.6.2.4	89876	72560	71778	102398	89528	106932	105900	119870	104532	109504	113136	109378	137538	104914	90336	107664	112408	92352	85474	72864	90648	106320	78232	66164	137872	131958	135846	142922	144116	178236	141084	127222	127456	143084	156240	127790	4034132	78071.3	10230.6	106798	8280.99	107535	17071.3	83283.7	14261	145158	16818.3	137146	11792.1
2.7.7.7	89632	70506	72564	88808	77716	93194	92390	102524	90576	94350	100182	94790	118518	90740	76780	93300	98670	80158	74198	63898	79532	91950	70642	60072	116168	110464	113850	116452	117226	144450	119952	108246	110496	121852	133836	109624	3488306	77567.3	10498.9	92725.6	7107.17	93027.7	14943.3	73382	11470.6	119768	12338.6	117334	9883.08
3.4.16.4	62844	48116	50888	69010	60428	74160	73954	81458	73446	75870	79916	76896	90018	69466	57858	67302	66756	58948	54160	47226	58802	65172	47794	38422	95228	91264	92986	95294	93612	116376	84870	78268	78808	88488	97732	78592	2640428	53949.3	7826.71	73904.2	6243.56	68391.3	11600.5	51929.3	9478.9	97460	9388.32	84459.7	7710.49
2.7.7.6	62376	51612	52382	59188	53476	61548	58638	66650	56322	61664	63062	63164	79524	59552	53032	61270	62308	55568	50602	42008	48380	55808	54778	50324	61902	58314	60376	63924	66080	79266	71864	66104	67674	75500	83190	68084	2205514	55456.7	6004.67	60412.4	3966.23	61875.7	9331.82	50316.7	4958.31	64977	7503.62	72069.3	6422.9
6.2.1.3	38274	30332	30380	47496	41330	50080	48594	54632	49060	48868	50920	49168	55706	42308	36206	39358	39130	36694	38354	32922	41024	42070	32264	26464	60860	58506	60614	63482	62244	78814	55014	50486	50676	56958	59116	50414	1708818	32995.3	4571.52	48905.3	3496.37	41567	7263.13	35516.3	6009.83	64086.7	7406.35	53777.3	3792.37
5.6.2.2	40752	32508	33274	41988	37174	42938	42044	49038	40646	43660	44978	44250	54862	40946	36356	43690	45220	38866	32316	27684	32892	40486	34874	29720	47032	43730	46336	47496	49924	58770	53306	47684	49216	55396	61410	49282	1560744	35511.3	4554.68	42968.4	3236.21	43323.3	6495.17	32995.3	4450.84	48881.3	5238.84	52715.7	5147.42
3.6.4.13	33658	28316	26434	38152	33374	41038	39070	45200	38376	40152	41376	41748	51434	38268	33822	37748	38658	34302	32598	28512	35566	44304	30924	26458	53378	52150	54670	49000	57082	64186	58066	52394	52944	60146	64942	52742	1551188	29469.3	3747.56	39831.8	3233.73	39038.7	6414.02	33060.3	6352.23	55077.7	5206.6	56872.3	5095.26
1.1.1.100	34764	24866	26688	51728	44874	53270	53260	59518	49962	55240	55444	52766	53160	38944	32848	36784	32968	34032	30384	26926	32294	37974	28548	24438	52294	51004	51408	48508	52130	64336	43398	39996	39908	44668	49024	41724	1550078	28772.7	5268.01	52895.8	4038.13	38122.7	7742.28	30094	4720.91	53280	5585.45	43119.7	3445.46
3.1.3.3	33138	28336	27850	38652	33638	43270	44284	46714	48212	43030	47864	43570	49808	42622	33880	39604	41506	35760	37266	31210	36232	31364	26384	21034	57396	53514	55088	62050	51590	75920	41898	38936	38546	43020	46870	41304	1511360	29774.7	2922.85	43248.2	4645.73	40530	5643.46	30581.7	6105.6	59259.7	8922.61	41762.3	3040.77
3.1.6.8	27510	26736	22444	41078	33018	40100	41562	52288	40184	40456	42868	40034	50464	37106	29430	32368	32832	26358	31680	30104	38236	38570	27800	22992	59528	57762	58722	56722	63240	72906	37294	34464	34872	36936	38748	36938	1434350	25563.3	2729	41287.6	4961.14	34759.7	8491.89	31563.7	6056.26	61480	6025.45	36542	1603.18
7.1.1.9	43236	32222	33724	46824	40354	45270	44974	52542	41172	48242	49496	46534	57224	41944	35084	42194	39332	36348	25592	21738	26506	32772	32798	29502	37450	34932	38366	30986	37876	42256	39054	36476	36978	39862	42514	37548	1399922	36394	5972.75	46156.4	3833.45	42021	7983.77	28151.3	4362.44	36977.7	3765.72	38738.7	2247.3
7.4.2.8	35046	29416	28964	36978	33170	38550	37604	42846	36878	39826	41656	40132	48358	36468	31460	37820	36652	33186	28864	23964	29742	34536	29240	25808	38546	36636	38252	41282	41320	49856	47650	44026	43938	50254	55108	44986	1369018	31142	3388.51	38626.7	2900.15	37324	5910.82	28692.3	3640.22	40982	4716.5	47660.3	4391.15
1.8.98.6	31958	27176	29146	24418	23466	32954	36382	34526	43396	32024	38034	32192	35670	35376	26200	25912	22810	27254	43098	34384	38462	20406	21586	14188	59562	53080	54088	79588	51864	89500	31008	30826	28790	33998	32686	32440	1308448	29426.7	2403.32	33043.6	6258.22	28870.3	5362.49	28687.3	11531.7	64613.7	15971.5	31624.7	1815.35
2.7.7.65	27902	24528	23240	33780	30868	37602	36794	41644	34716	39352	40974	40610	39016	29198	26172	30244	31680	28128	25302	20688	25068	35164	26030	22888	36360	34658	35958	39336	36264	45732	39902	36014	37182	42150	55076	37854	1228074	25223.3	2407.53	37371.1	3678.91	30739.7	4465.17	25856.7	4962.14	38051.3	4064.36	41363	7059.83
1.3.8.7	26424	19578	20154	39906	35702	41500	39648	44544	35814	40976	41060	39200	38384	29520	25286	26402	21420	25864	24758	22078	28226	31664	24244	21098	40740	40104	42368	35004	44518	47372	39652	36024	37294	40348	43538	35522	1225934	22052	3797.2	39816.7	2771.28	27812.7	5791.47	25344.7	3962.25	41684.3	4215.75	38729.7	3041.73
5.2.1.8	35924	26990	28210	31960	27812	33598	33984	38978	34242	35142	37336	35338	42268	31214	26980	34754	39806	28858	24294	20124	24534	27830	23252	18870	45108	42670	43588	46330	44306	56374	34066	31336	32438	34292	38930	32830	1224566	30374.7	4844.42	34265.6	3182.81	33980	6101.11	23150.7	3243.83	46396	5046.98	33982	2657
1.8.98.5	29336	25676	26908	21472	20942	29470	32658	30850	39370	29160	35410	29364	33956	33372	24712	24034	21216	24934	37600	30252	34484	18266	18610	12406	53078	47460	48128	70880	45484	78618	29432	29510	27390	32360	31206	30814	1188818	27306.7	1862.28	29855.1	5924.83	27037.3	5305.38	25269.7	10204.3	57274.7	13980.4	30118.7	1730.72
1.4.1.13	29060	24224	23338	29618	26614	31364	30872	34120	31132	33118	33734	33130	38592	27830	24200	27832	26068	24438	23130	19408	25168	28916	22766	20018	39764	39310	40270	35050	38890	45614	42272	38572	38920	43046	46444	37960	1154802	25540.7	3079.86	31522.4	2374.04	28160	5347.05	23234.3	3499.61	39816.3	3395.7	41202.3	3306.32
1.8.7.3	25406	22110	23314	18168	17718	24846	27718	26074	33108	24368	29554	24696	28450	28504	20854	20452	17964	21412	32802	26128	29546	15400	16368	10664	44698	40314	40982	58860	38130	65560	24722	24622	23000	27194	26070	25796	1005572	23610	1667.82	25138.9	4937.93	22939.3	4448.71	21818	8879.77	48090.7	11339.2	25234	1448.02
1.8.98.4	25354	22028	23250	18136	17678	24796	27654	26040	33032	24324	29520	24656	28204	28280	20756	19820	17280	20958	32714	26072	29478	15370	16336	10646	44648	40266	40936	58816	38078	65478	24638	24482	22908	27064	25914	25694	1001304	23544	1682.38	25092.9	4928.67	22549.7	4599.55	21769.3	8853.51	48037	11330.1	25116.7	1433.27
7.1.2.2	26164	21722	21280	25258	22476	25994	25520	28660	24152	26408	27558	27108	35944	26948	24038	27040	27474	24138	22712	19028	22292	26512	24224	20936	31024	30056	30972	30642	31960	38430	33700	31210	31402	35078	38336	31514	997910	23055.3	2701.24	25903.8	1851.64	27597	4360.05	22617.3	2591.32	32180.7	3123.57	33540	2810.6
7.2.2.1	26138	21698	21266	25168	22396	25892	25456	28558	24102	26326	27476	27030	35860	26886	23984	27004	27436	24080	22686	18986	22262	26460	24148	20862	31000	30034	30944	30610	31932	38376	33676	31182	31370	35068	38316	31474	996142	23034	2696.81	25822.7	1843.81	27541.7	4348.91	22567.3	2588.16	32149.3	3112.45	33514.3	2817.69
2.4.1.129	21908	17794	18168	27012	23676	29424	29288	32036	27862	30332	30896	30524	30344	23496	20602	23698	23778	22320	20088	17420	21714	22456	18290	15012	32852	31874	32048	34114	32716	41438	30380	28156	28624	33000	37152	28516	969008	19290	2274.95	29005.6	2519.02	24039.7	3316.63	19163.3	2801.36	34173.7	3645.62	30971.3	3525.07
2.2.1.6	22832	18572	17920	33498	29024	33654	34620	38334	30624	36004	37088	33302	31792	25090	20576	22638	20338	21508	18694	16054	19710	23448	19350	18492	29358	27986	30104	26548	29780	35306	27066	25022	25154	27830	29326	25114	961756	19774.7	2667.72	34016.4	2952.42	23657	4345.03	19291.3	2405.52	29847	2981.85	26585.3	1786
7.2.2.10	21702	18550	17384	19776	17576	21440	21466	23162	22770	21404	22124	21864	39028	30326	25494	28742	27460	22628	20414	18218	22304	26342	16032	13048	30990	29946	31834	25564	28734	34570	38236	35050	35036	40232	42034	35360	946840	19212	2233.82	21286.9	1690.86	28946.3	5614.88	19393	4706.19	30273	3035.3	37658	3002.21
2.3.1.9	19902	15994	15644	27720	24444	29194	29036	31930	28156	30378	30662	29340	29490	23000	19178	21722	19790	21248	19688	16186	21088	22630	17570	15734	30210	28886	29958	29722	29972	37158	28296	26562	25976	29100	32252	26636	914452	17180	2363.81	28984.4	2136.18	22404.7	3731.17	18816	2772.62	30984.3	3059.03	28137	2336.21
1.2.7.3	28598	21250	22922	22532	20116	24492	26044	27074	26340	27770	29720	25316	32222	25590	21166	25134	26028	21402	20942	17050	21238	18696	16666	15620	29992	27692	28670	36486	30820	41856	25854	24012	24890	26186	26558	24448	911392	24256.7	3851.53	25489.3	2856.7	25257	4020.67	18368.7	2330.47	32586	5482.28	25324.7	1022.13
1.1.1.1	21124	16830	16850	27406	23978	28526	29326	31282	27894	29678	30046	28206	31026	24384	20312	21174	17868	20128	18918	15838	20470	22194	17124	15908	30978	29060	30426	27460	28736	36276	27426	25156	25076	28300	32240	26532	904156	18268	2473.39	28482.4	2070.52	22482	4687.59	18408.7	2582.61	30489.3	3099.11	27455	2661.13
1.2.7.1	24276	21432	20000	19534	16524	20442	20936	22294	21636	22692	24428	22118	25942	21180	17862	21102	22654	18924	21152	18380	23534	23160	19048	15942	31536	30278	31162	33382	32398	39800	33670	31826	31098	34380	33790	30732	899244	21902.7	2176.51	21178.2	2240.43	21277.3	2859.97	20202.7	2951.39	33092.7	3453.34	32582.7	1553.84
3.4.21.53	24936	19878	20564	24830	20862	25116	26184	28284	26164	27004	29664	26014	31124	26288	22268	25080	26166	22568	21502	17618	20364	18388	19066	17074	29194	27104	27350	32676	27878	38904	23114	21756	21872	23846	24966	22886	888552	21792.7	2743.73	26013.6	2456.07	25582.3	3220.93	19002	1680.4	30517.7	4591.21	23073.3	1216.1
3.2.1.21	18368	16086	15040	18344	17222	23680	21912	22312	25180	21102	22666	24036	30922	22160	19126	23416	23980	20324	16258	15078	19096	23880	12738	11152	38714	38130	38730	40754	38964	47552	26278	24754	24234	27340	28936	25350	883814	16498	1701.82	21828.2	2606.85	23321.3	4150.82	16367	4602.87	40474	3580.23	26148.7	1758.08
6.3.5.5	23486	19322	19156	24022	21218	23860	24474	27732	22960	25022	26666	25128	29740	23238	21244	23556	24740	20642	18528	15456	18296	22196	20172	17060	25892	24980	25442	27682	27952	34264	29894	26808	27126	30472	33578	27674	879678	20654.7	2453.41	24564.7	1921.86	23860	3256.6	18618	2356.03	27702	3432.66	29258.7	2592.21
3.4.21.107	18942	14812	15678	28140	24178	28306	29932	34652	28424	30012	31712	28868	33154	25736	19944	22798	21298	19926	17612	15656	18628	19084	16828	12944	28932	26656	27330	30940	27974	37968	22680	20640	21018	23550	24946	22410	872308	16477.3	2177.94	29358.2	2847.37	23809.3	5067.26	16792	2253.68	29966.7	4193.39	22540.7	1598.24
2.1.1.13	22188	18910	17740	23976	21476	25790	25872	28256	25574	26774	28030	25742	31446	23852	20340	23864	24386	21076	17284	14906	18644	20898	17126	16402	29078	26544	28108	29690	28984	36900	25492	23802	23784	26116	27546	24362	870958	19612.7	2305.75	25721.1	2060.98	24160.7	3935.04	17543.3	2047.67	29884	3606.42	25183.7	1489.17
3.5.1.81	20674	14880	16326	21150	17938	21012	21614	24800	19574	22456	22960	21268	26644	22600	19168	18104	17314	15230	21668	19340	23936	21400	18434	14754	32380	30960	32466	26796	33014	35702	33350	31708	31698	32446	33806	31846	869416	17293.3	3015.69	21419.1	1959	19843.3	4123.35	19922	3181.39	31886.3	2938.72	32475.7	908.37
1.17.4.1	26462	20744	21210	23374	21266	23960	23236	26700	21438	24294	24874	24516	31500	23718	20994	24460	25034	21502	17798	14708	17580	21836	20968	17830	24606	23180	24302	23498	26052	29652	28026	25764	26524	29140	32508	26302	859556	22805.3	3175.33	23739.8	1688.67	24534.7	3772.83	18453.3	2583.57	25215	2395.05	28044	2516.83
1.2.5.3	18632	14138	14324	39748	34494	38766	39752	45038	34126	44114	43992	39776	31968	24560	18954	18448	12784	20294	13974	11854	14786	18764	15528	13940	21336	20576	21660	18676	21868	25206	16544	15578	15374	17070	18420	15948	851010	15698	2542.62	39978.4	3948.99	21168	6503.86	14807.7	2295.38	21553.7	2132.31	16489	1134.48
4.2.1.17	19164	14748	15528	25114	21760	25126	25176	28396	22900	26238	27542	24614	25256	19386	16784	18682	16746	17804	18442	16014	19934	22254	17546	15232	28656	26996	28352	26962	29712	36632	27784	25352	26204	29098	33696	26092	845922	16480	2356.9	25207.3	2069.32	19109.7	3185.5	18237	2588.72	29551.7	3623.15	28037.7	3084.35
6.3.5.7	21630	17138	17166	26814	23268	27240	27510	31066	25338	29476	30612	27788	29520	22988	18844	22768	21440	20544	17374	14662	18444	20232	17932	15358	23662	22964	23494	24494	25220	30958	25266	22684	23506	25898	28298	23372	844968	18644.7	2585.41	27679.1	2480.48	22684	3679.76	17333.7	2051.04	25132	2963.15	24837.3	2090.05
1.2.7.11	26782	19754	21244	21036	18708	22646	24020	25144	23954	25672	27318	23302	29848	23610	19496	23268	23678	19616	19212	15516	19662	17874	15824	14950	27206	25424	26244	32238	28334	37204	24280	22458	23386	24526	25024	23052	841510	22593.3	3703.2	23533.3	2556.05	23252.7	3772.14	17173	2017.48	29441.7	4486.98	23787.7	978.428
2.8.1.7	21620	16220	17350	21312	18292	22286	22282	25058	21620	23546	24942	23176	29388	22260	19224	23238	23470	19968	17830	15436	18902	21466	16954	14226	28240	25832	26722	30826	29538	37742	26866	24156	24430	27134	29292	24918	835762	18396.7	2848.09	22501.6	2062.89	22924.7	3606.91	17469	2571.97	29816.7	4285.97	26132.7	1990.15
6.3.5.6	20702	16476	16392	25654	22420	26332	26720	30132	24630	28400	29602	26876	28398	21644	17908	20948	18682	19080	16860	14244	17938	19876	16914	14190	22532	22130	22702	21346	23348	28206	24720	22152	22938	25338	27754	22860	807044	17856.7	2464.49	26751.8	2422.04	21110	3839.15	16670.3	2191.7	23377.3	2456.41	24293.7	2084.53
1.6.5.5	19550	14670	14912	24302	21372	25480	25230	29010	23792	27848	27716	26630	25274	18872	16150	17176	14282	16262	14566	12794	16588	20100	13716	12144	24374	23852	24132	20736	23542	27894	24626	22512	22174	24888	27870	22206	767242	16377.3	2750.27	25708.9	2374.19	18002.7	3863.08	14984.7	2945.86	24088.3	2287.32	24046	2232.11
6.3.1.2	19950	15744	15786	23258	19864	22698	22266	25762	20182	22822	23420	22804	27986	20172	17244	20166	19442	17990	14814	12260	15640	18208	16648	15748	20150	18830	19676	21188	22586	26456	24556	22784	23440	25796	27908	22942	747186	17160	2416.3	22564	1754.87	20500	3854.36	15553	1984.12	21481	2760.97	24571	1988.09
1.3.5.1	20624	16686	16254	20310	17700	20508	20824	22876	19278	21194	22412	21222	26670	19686	17038	19004	17702	16868	15960	13360	16060	17698	15454	14650	23056	21954	22630	22484	23284	28202	23542	21836	22398	24894	25918	22312	732548	17854.7	2408.02	20702.7	1557.59	19494.7	3685.4	15530.3	1459.8	23601.7	2300.86	23483.3	1623.87
6.2.1.1	18448	14386	14622	19584	16984	19672	20208	22300	18354	21074	21150	20818	26202	19472	16968	19416	18628	17120	14304	11830	14554	18650	14598	12776	19228	18892	20016	19970	20836	25128	26210	23542	24464	28146	30606	24346	713502	15818.7	2280.12	20016	1603.21	19634.3	3395.65	14452	2339.26	20678.3	2282.95	26219	2709.75
1.2.4.1	17108	13510	13994	18880	16774	19848	19374	22042	18404	20286	20764	20686	26376	20080	17124	19092	18106	16802	13534	11692	14958	18754	14984	13210	21156	20280	21716	18892	21984	25766	25006	22830	22944	25940	26882	23006	702784	14870.7	1952.64	19673.1	1539.8	19596.7	3538.19	14522	2409.14	21632.3	2314.43	24434.7	1756.13
5.1.3.2	15432	11898	12270	18234	16198	20336	19802	22476	19536	20988	22304	20620	24954	19172	15380	18936	17706	16718	14088	12802	15724	17896	11420	9824	25640	24046	25272	25002	24176	31652	22304	19896	20224	22956	25142	20840	701864	13200	1941.9	20054.9	1959.39	18811	3324.33	13625.7	2927.41	25964.7	2854.41	21893.7	1986.82
1.17.1.9	22358	18086	17976	20384	17550	20974	21156	23380	19568	21178	22154	21036	24636	18620	15878	20588	18628	17424	15134	11992	15060	15508	16052	13920	19966	18764	19700	17846	19804	23502	22036	20686	20882	22480	22812	20750	698468	19473.3	2498.8	20820	1623.85	19295.7	3042.21	14611	1462.39	19930.3	1925.19	21607.7	949.369
5.6.2.3	16420	13142	13532	15942	14452	17964	17204	18752	17372	16948	18578	17728	24070	18540	15748	19804	23164	16422	14970	12780	15770	18260	13984	11996	22876	22390	22490	24640	23596	28482	24442	22238	22608	24744	27842	22732	692622	14364.7	1790.62	17215.6	1341.41	19624.7	3428.77	14626.7	2252.55	24079	2313.41	24101	2102.32
5.6.1.7	18206	15914	15052	20454	17740	20496	20810	23172	19118	21628	21676	20586	23480	18624	15710	16616	15592	16018	14908	12890	15974	16810	16126	15008	17868	16594	17684	17056	19308	22836	21582	19332	19906	22518	24458	19600	671350	16390.7	1630.13	20631.1	1552.15	17673.3	3055.02	15286	1375.68	18557.7	2289.85	21232.7	2010.72
2.3.1.20	12984	10172	9602	13470	11710	14040	13794	15692	13438	13928	14054	14118	19392	14822	11982	12310	11512	9946	12400	11396	17186	20300	10234	8380	25412	25440	26768	19608	26268	27302	34960	30958	31378	35118	37138	29934	667146	10919.3	1810.62	13804.9	1026.35	13327.3	3364.16	13316	4519.77	25133	2805.84	33247.7	2873.45
3.1.2.6	15458	11574	11666	17276	15058	17716	17730	19580	17934	18110	19300	17430	25120	18562	15298	18382	17276	15418	14274	12344	15102	17058	11658	9506	23640	22806	23198	25828	22854	31424	21370	20072	19692	22090	23976	20434	666214	12899.3	2216.35	17792.7	1297.79	18342.7	3603.98	13323.7	2695.17	24958.3	3360.32	21272.3	1589.28
3.5.2.14	14528	11022	10926	26126	22850	25896	26770	30318	22914	30214	29712	26028	23444	18172	13772	14924	11896	14828	14492	12364	14404	15800	14286	12968	19090	17916	18724	18276	18418	23344	14870	13986	13784	15414	15632	14532	662640	12158.7	2052.46	26758.7	2851.93	16172.7	4105.85	14052.3	1220.83	19294.7	2023.44	14703	746.236
2.3.1.51	17494	13290	13380	13606	12324	15656	15516	17026	15902	15588	16766	15736	20154	15442	13480	16404	16196	13700	14042	12206	16198	19770	11750	9874	23772	22460	23188	23466	24572	29008	25488	22900	23270	26092	29218	23014	657948	14721.3	2401.62	15346.7	1485.08	15896	2422.57	13973.3	3561.64	24411	2356.34	24997	2472.62
2.3.1.75	12832	9998	9460	12714	10960	13284	13142	14736	12736	13028	13204	13216	19152	14504	11754	12068	11288	9562	12080	11110	16878	19854	9968	8184	24782	24786	25988	18918	25510	26424	34000	30152	30420	33982	35900	29100	645674	10763.3	1811.6	13002.2	969.318	13054.7	3384.17	13012.3	4445.69	24401.3	2763.97	32259	2722.4
6.1.1.5	16262	13300	13450	17346	14654	17666	17234	19770	17334	18464	19038	18444	21904	16836	14576	17664	17158	15782	13596	11614	14116	16352	13324	11712	19072	18402	19056	19832	20128	24452	20072	18162	18766	21252	23258	19002	629050	14337.3	1668.5	17772.2	1454.35	17320	2501.47	13452.3	1748.93	20157	2191.94	20085.3	1899.5
2.3.2.2	16520	12226	12432	18224	15172	17662	17534	20114	15878	18832	19028	16854	20844	16450	13876	15526	15930	13100	14612	12434	15744	18818	15926	13632	21452	20082	20644	21546	23364	26606	17968	16600	16398	17684	17852	16448	624012	13726	2421.87	17699.8	1565.33	15954.3	2713.13	15194.3	2207.62	22282.3	2392.54	17158.3	749.33
3.4.19.13	16520	12226	12432	18224	15172	17662	17534	20114	15878	18832	19028	16854	20844	16450	13876	15526	15930	13100	14612	12434	15744	18818	15926	13632	21452	20082	20644	21546	23364	26606	17968	16600	16398	17684	17852	16448	624012	13726	2421.87	17699.8	1565.33	15954.3	2713.13	15194.3	2207.62	22282.3	2392.54	17158.3	749.33
3.1.3.5	16764	12768	12484	14080	12932	16206	15664	17616	17586	16116	16646	16526	25376	19958	16190	19386	19580	16054	12530	11452	13462	16084	10224	8604	21892	20110	20894	25118	21154	27984	18784	17084	17142	19084	21676	17406	622616	14005.3	2393.29	15930.2	1542.92	19424	3392.72	12059.3	2610.12	22858.7	3053.82	18529.3	1763.5
6.1.1.20	15880	12762	12844	16454	14334	17364	17720	19290	17464	18092	19330	17950	21160	16092	13726	17110	17824	15100	13026	10994	13552	15456	12598	10544	19794	19352	19432	22160	20398	26270	18992	17752	18090	20110	22440	18638	620094	13828.7	1776.98	17555.3	1510.97	16835.3	2568.56	12695	1788.67	21234.3	2675.08	19337	1726.33
1.1.99.14	17510	13278	13726	16654	14606	17878	18684	20070	18570	19312	20628	18414	21218	16484	13452	14820	14194	13442	14156	11572	13824	14406	12386	10064	20890	21048	21520	21414	19974	25682	17848	16326	16014	18332	17886	16296	612578	14838	2324.84	18312.9	1814.58	15601.7	2973.2	12734.7	1709.15	21754.7	2000.64	17117	1011.76
7.2.2.8	15158	12548	13106	17194	15010	17688	18688	20692	19270	18848	20100	18680	21864	17098	14080	20208	20710	17200	11356	9508	11598	12364	9960	8362	17476	16790	17140	17350	16902	22140	19034	17314	17824	19580	23330	18108	604278	13604	1374.42	18463.3	1683.73	18526.7	2908.8	10524.7	1500.39	17966.3	2061.03	19198.3	2185.03
1.1.1.35	16912	13342	13528	16004	13598	16422	16150	18500	15510	16778	17222	16334	20366	15108	13174	16076	15252	13544	13240	11282	14144	16858	12996	11902	19934	18332	19224	19172	20278	24684	19526	18050	18638	19902	23230	18544	603756	14594	2009.6	16279.8	1321.27	15586.7	2585.19	13403.7	1971.29	20270.7	2265.03	19648.3	1881.63
6.3.5.3	14576	12170	11904	15472	13382	15538	15986	17406	15502	16836	17476	16968	20136	15294	13350	16428	16840	13878	12460	10644	13234	15284	12248	10584	20254	19786	20296	21188	20762	26004	19960	18210	18552	20894	23494	18886	601882	12883.3	1471.91	16062.9	1291.81	15987.7	2450.23	12409	1756.17	21381.7	2314.47	19999.3	1977.41
6.4.1.2	15032	11864	11998	16112	14218	17074	16548	19154	15312	18726	19366	18116	20090	15040	13064	15214	15622	14126	11998	10410	12550	15958	12838	10544	18912	17686	18564	20084	20172	24412	20644	18038	18716	20976	23570	18926	601674	12964.7	1791.62	17180.7	1794.28	15526	2416.37	12383	2021.8	19971.7	2370.57	20145	2031.63
2.4.1.1	13874	11406	11174	14508	13128	15890	16900	18630	17346	16868	18830	17816	17736	14382	12522	12870	13566	11970	13956	12190	13562	15986	11194	9006	24012	23168	23856	22870	22446	28028	19310	18034	17384	19580	19650	17910	601558	12151.3	1496.38	16657.3	1877.38	13841	2084.35	12649	2419.77	24063.3	2030.06	18644.7	982.867
6.3.5.4	13422	9164	10418	19030	16298	18262	18836	22366	17570	19252	20392	18382	19598	15616	12528	15350	16770	13256	11776	10090	12480	12414	13402	11020	22684	21700	22216	22554	20580	27504	16392	15644	15050	16532	17050	15762	601360	11001.3	2188.12	18932	1717.18	15519.7	2541.99	11863.7	1175.97	22873	2393.7	16071.7	720.313
2.2.1.1	13242	11450	10980	16052	13938	16680	17364	19040	17462	18896	19088	18092	21508	17094	14736	16670	16808	14794	13256	10870	13208	13264	11034	9834	20444	19428	19876	21986	20300	26546	17802	15686	16046	18312	20028	16804	598618	11890.7	1193.65	17401.3	1680.1	16935	2467.53	11911	1515.82	21430	2651.59	17446.3	1613.27
4.2.1.3	14568	12500	12168	16762	14952	17980	17122	19142	16806	18152	18766	18436	21214	16552	14496	16762	16602	15672	12068	10412	12420	14622	12850	11772	17360	16766	17230	16858	18088	21152	18952	17322	18068	20056	22708	17950	595306	13078.7	1300.44	17568.7	1296.61	16883	2285.83	12357.3	1384.63	17909	1656.66	19176	1973.2
6.1.1.4	15444	12734	12712	16538	14920	16824	16822	18852	17130	17110	18068	17536	21528	16332	13832	16358	16440	14768	12492	10362	12814	14570	11964	10572	17824	17800	17696	18324	18954	22428	18806	17428	17772	20070	21988	17688	593500	13630	1571.01	17088.9	1085.02	16543	2662.32	12129	1557.77	18837.7	1820.74	18958.7	1777.69
3.2.1.23	10668	10312	9078	13410	12598	17276	16982	18598	20066	16660	16834	20320	22654	14430	13008	18400	22048	13694	8784	8462	10580	12442	7136	5784	24916	22886	23316	34976	28104	36364	13812	13078	12908	13670	14458	13406	592118	10019.3	834.425	16971.6	2632.83	17372.3	4290.66	8864.67	2382.73	28427	5918.48	13555.3	559.11
3.1.1.24	11612	8360	9074	17300	15536	18566	18886	20504	17330	19598	20654	18466	19514	14830	11582	12594	10090	12044	10962	9980	12760	14528	9432	7720	19726	18870	19860	18696	19976	25006	19768	17702	17824	20396	23632	18406	581784	9682	1709.13	18537.8	1643.06	13442.3	3351.56	10897	2438.84	20355.7	2339.81	19621.3	2240.46
6.1.1.9	15474	11780	12452	15046	13452	15994	15760	17566	15770	16384	17106	16112	19406	15152	13134	15974	15832	13828	12450	10740	12878	14938	12156	10428	18908	17852	17674	19394	18720	23294	18884	17262	17558	19402	20540	17578	576878	13235.3	1967.64	15910	1187.21	15554.3	2194.93	12265	1628.93	19307	2058.7	18537.3	1294.94
3.4.21.102	15888	12266	12908	13766	11758	14572	14816	16684	14938	14226	15366	14406	21748	16722	14130	17536	20042	13316	12058	10648	12288	16092	11576	9738	22334	20614	20410	24492	21730	28258	15332	14394	14586	15390	16610	15124	576762	13687.3	1932.68	14503.6	1320.88	17249	3274.1	12066.7	2187.62	22973	2977.44	15239.3	782.911
6.4.1.3	14710	12158	11520	15366	13804	15816	15562	17720	14794	16162	16420	16486	17854	13524	11828	12816	10692	12200	10708	9834	13478	15608	11672	10404	16548	16486	17198	16054	17848	20820	23364	20434	21076	24036	25162	20720	570882	12796	1687.99	15792.2	1113.17	13152.3	2492.83	11950.7	2200.14	17492.3	1746.98	22465.3	1982.39
6.3.2.2	13280	10806	9740	16226	13574	16190	15636	18634	14818	16446	16468	16260	19612	13444	11836	13114	12394	10958	11846	10080	12158	16758	12434	10740	20294	20100	21312	16116	19980	21978	19454	17864	18144	19988	22022	18002	568706	11275.3	1816.07	16028	1365.59	13559.7	3096.49	12336	2344.02	19963.3	2040	19245.7	1610.71
1.8.1.4	13810	11190	10918	14700	12640	15332	15122	17028	15546	16180	16702	16382	20020	15172	13264	15494	16310	13442	12836	10414	12882	14888	12216	10354	20284	19050	19298	20158	19400	25416	16630	15188	15846	16764	19260	15350	565486	11972.7	1596.98	15514.7	1323.39	15617	2463.62	12265	1712.74	20601	2409.43	16506.3	1495.03
2.7.9.1	13342	11018	10874	13802	12130	14608	15118	16440	15454	16064	16560	15236	19636	15282	12982	14400	15072	12520	12460	10708	13172	13416	10794	9000	19386	18284	19158	20932	21250	24966	18208	16982	16566	18622	19072	16712	560226	11744.7	1385.2	15045.8	1401.87	14982	2536.06	11591.7	1715.43	20662.7	2386.97	17693.7	1074.05
1.8.1.9	13350	10050	11036	16288	14478	17550	17382	18910	17176	18208	19492	18266	19130	14614	12862	14760	13422	13466	11472	9696	12168	13674	10798	8764	19176	17556	18224	19086	17944	23702	16104	14904	14912	16776	18344	15430	559170	11478.7	1693.95	17527.8	1489.97	14709	2287.78	11095.3	1756.34	19281.3	2257.2	16078.3	1325.17
1.4.4.2	14424	11980	11942	14032	12336	15082	14704	16970	14842	15282	16300	15578	19014	14886	12642	14888	15232	12652	12384	10414	12356	14590	11666	10086	18462	17756	18430	19100	18594	23140	18260	17150	17498	18596	19798	17514	558580	12782	1422.14	15014	1329.28	14885.7	2331.8	11916	1626.67	19247	1955.01	18136	975.228
5.4.99.2	14004	11258	11542	16494	14338	16654	16606	18914	15918	18556	19394	17718	18628	14240	12442	14052	13832	12700	11678	9998	12292	13312	10920	9820	16920	15378	16432	19838	18634	24034	16950	15368	15600	17402	18622	15846	556334	12268	1510.11	17176.9	1613.91	14315.7	2237.25	11336.7	1356.25	18539.3	3128.71	16631.3	1259.73
2.7.6.5	14946	12144	12012	13042	12192	13696	13844	15304	14442	13956	14870	14470	19106	14346	12396	14716	15284	12198	12088	10440	12796	14442	11222	10070	20432	19546	20024	19146	19720	24250	17910	16500	16658	18336	20278	16578	553400	13034	1657.16	13979.6	947.044	14674.3	2507.75	11843	1626.08	20519.7	1878.47	17710	1475.04
1.2.7.5	13140	11732	11802	11216	9888	14016	15164	13716	19076	13008	16202	13444	15164	15386	11332	13214	14276	12340	18418	14840	17422	8522	8254	7008	23880	21310	21488	32440	19586	37034	13060	12748	12318	13636	13668	13458	553206	12224.7	793.474	13970	2692.46	13618.7	1610.66	12410.7	5073.29	25956.3	7088.01	13148	540.609
4.1.1.37	11928	11050	10106	10998	9756	12956	13722	13832	15106	13168	15026	13080	20190	16530	12536	15352	15364	12372	13404	11994	15548	11940	7150	6264	23240	20694	21706	26244	21180	31312	16310	15648	15214	17034	17812	16350	552116	11028	911.199	13071.6	1741.96	15390.7	2884.28	11050	3621.39	24062.7	4079.2	16394.7	935.76
2.7.9.2	12956	11112	11360	12556	11506	15004	15752	16220	17216	15220	16416	14972	19424	15950	13508	14074	15978	13374	13364	11630	12602	12864	10152	7624	20184	18084	18284	25952	19998	28814	14264	14052	13766	15616	16034	14820	550702	11809.3	1000.75	14984.7	1843.84	15384.7	2292.18	11372.7	2159.14	21886	4436.68	14758.7	904.955
2.1.1.201	11600	8806	8896	17418	15024	18402	18874	21316	18198	20006	20688	18604	17646	13802	10938	12530	11024	12152	10840	9516	12162	12732	8954	7960	18784	17252	18196	18630	17208	23676	15176	14050	14056	15524	16672	14538	541850	9767.33	1587.77	18725.6	1871.9	13015.3	2502.94	10360.7	1873.67	18957.7	2406.28	15002.7	1010.76
2.1.1.163	11592	8802	8892	17388	14996	18360	18846	21264	18174	19978	20656	18570	17582	13766	10898	12510	11018	12112	10836	9506	12160	12718	8952	7952	18778	17240	18184	18622	17194	23656	15168	14042	14052	15512	16662	14526	541164	9762	1585.47	18692.4	1867.63	12981	2488.16	10354	1872.79	18945.7	2403.24	14993.7	1009.31
6.2.1.13	12556	10690	10158	13552	11912	14898	15980	16768	16742	16504	17534	16078	16952	13664	11360	13390	13890	11454	11200	9544	12438	9854	9274	7252	20066	18736	19622	24330	19414	27530	15526	14690	14646	15782	16424	14966	535376	11134.7	1259.32	15552	1798.14	13451.7	2042.5	9927	1769.73	21616.3	3517.47	15339	699.86
3.5.1.4	10378	7654	8098	15886	13872	16424	15892	18284	13892	16566	16594	16010	16874	12968	10534	11422	10174	10572	11038	9896	12890	14376	10652	9010	19288	17924	18852	17320	19148	22240	18604	17000	17036	19278	21006	16482	534134	8710	1461.49	15935.6	1370.63	12090.7	2549.52	11310.3	1984.6	19128.7	1703.24	18234.3	1728.48
1.1.1.95	14236	11000	11398	16186	14148	17302	16944	19160	16258	17200	18442	16878	19048	14234	11856	14126	14072	12924	11038	9506	11382	12550	9494	8534	16668	15984	16458	16978	16168	21738	15340	14276	14320	15470	16296	14924	532536	12211.3	1764.67	16946.4	1423.7	14376.7	2468.25	10417.3	1489.57	17332.3	2187	15104.3	767.223
1.1.1.399	14236	11000	11398	16186	14148	17302	16944	19160	16258	17200	18442	16878	19048	14234	11856	14126	14072	12924	11038	9506	11382	12550	9494	8534	16668	15984	16458	16978	16168	21738	15340	14276	14320	15470	16296	14924	532536	12211.3	1764.67	16946.4	1423.7	14376.7	2468.25	10417.3	1489.57	17332.3	2187	15104.3	767.223
2.7.7.49	7912	9704	6992	14822	12764	14866	15808	17350	16994	13192	14690	13774	11864	11278	9786	9512	9580	8946	14834	13002	14616	16562	12418	13184	24926	25094	25232	21376	19770	25820	13346	12606	12318	13608	14054	14090	526690	8202.67	1379.17	14917.8	1581.45	10161	1142.24	14102.7	1532.33	23703	2495.34	13337	738.558
3.2.1.52	12640	8942	10384	11664	10444	13478	13826	14628	14258	13728	14560	13962	17030	12458	10292	15086	17858	12496	9938	8850	11132	12400	7454	6068	21306	19862	20736	25810	21590	28648	15906	14446	14604	16482	17420	15028	525414	10655.3	1863.87	13394.2	1412.09	14203.3	2945.69	9307	2342.18	22992	3453.29	15647.7	1168.01
3.5.1.28	11806	9816	9340	13858	12158	15214	15836	18014	15688	15530	16748	14968	17020	12784	11104	13038	13106	11766	11216	9668	11170	14742	10332	8450	19650	18820	18940	20258	19576	24532	14612	13376	13576	15102	17696	14186	523696	10320.7	1308.17	15334.9	1658.74	13136.3	2060.38	10929.7	2134.08	20296	2140.01	14758	1575.17
2.7.7.4	12268	10578	10078	15158	13544	15868	15280	17748	15224	15216	15850	15930	19222	13358	11712	14164	13854	11984	10376	9144	11246	12762	10604	9544	16654	15940	16232	16718	17590	20938	16414	14694	15266	17236	18400	15556	522350	10974.7	1147.62	15535.3	1097.34	14049	2720.83	10612.7	1294.28	17345.3	1846.79	16261	1377.82
2.7.9.6	10040	9872	8230	12536	11468	14788	14844	14990	16534	14110	15174	13452	19192	15832	12392	13040	11256	11704	11446	10306	12776	10898	7354	6000	20786	19388	20030	19366	18758	25352	17190	15728	15478	17422	17288	15606	520626	9380.67	1000.04	14210.7	1523.98	13902.7	3051.71	9796.67	2586.52	20613.3	2421.76	16452	935.201
6.1.1.14	14752	11774	11622	12936	11514	14110	13812	15748	13776	14512	15596	14172	18666	14304	12042	14434	15462	12124	11492	9564	11692	13112	11312	9554	17088	15506	16494	17378	16870	21480	15834	15346	15288	16380	18414	15694	519854	12716	1764.86	14019.6	1289.42	14505.3	2449.93	11121	1367.04	17469.3	2069.03	16159.3	1172.63
3.4.11.2	12362	9518	10074	11206	9788	12360	12232	13868	13176	12688	13334	13146	14380	11148	9982	12926	14548	11890	11474	9862	11418	12568	10032	8486	19584	19604	19830	20378	20272	23948	19324	17524	17746	19732	21142	17454	519004	10651.3	1507.34	12422	1252.13	12479	1813.72	10640	1458.27	20602.7	1672.31	18820.3	1495.09
2.3.1.12	11896	9294	9118	12990	11756	14602	14592	16450	14860	15258	16160	14850	19046	15088	12544	13908	13264	11210	9454	8824	10556	12848	8546	7526	17162	16194	17184	16068	16766	21362	18112	16468	16596	18894	21830	17134	518410	10102.7	1555.56	14613.1	1461.94	14176.7	2717.09	9625.67	1870.58	17456	1970.41	18172.3	2018.45
6.1.1.7	12792	10584	10708	13786	12064	14578	13936	15914	13654	14620	15546	14876	17502	13582	11716	14102	14732	12412	11028	9452	11852	12758	10874	9458	17040	15892	16472	18004	16742	21506	16874	15192	15258	16958	18912	15864	517240	11361.3	1240.54	14330.4	1144.24	14007.7	2035.83	10903.7	1307.79	17609.3	2032.68	16509.7	1401.77
4.4.1.16	14102	10530	11038	13364	11268	13488	13798	15174	12928	14082	14948	13870	19120	13988	11960	14636	14632	12080	10272	9132	11106	13518	10752	9284	17188	15952	16350	19450	18380	22762	16154	14582	14680	16594	17220	15298	513680	11890	1932.41	13657.8	1149.29	14402.7	2603.6	10677.3	1597.03	18347	2521	15754.7	1072.36
2.1.3.15	13788	11256	11094	14250	12508	14720	14498	16800	13526	15838	16368	15502	17508	13084	11408	13184	12852	11640	9832	8542	10966	13288	11084	10002	15232	14436	15110	15892	15926	19630	17068	15002	15862	17500	19226	15986	510408	12046	1510.79	14890	1379.87	13279.3	2204.58	10619	1598.39	16037.7	1844.64	16774	1497.9
5.6.2.1	13710	10702	10768	13394	12294	14096	13462	15414	13130	14086	14928	14284	18154	13750	11992	14764	15258	13312	11078	9268	11178	13110	10898	9464	15690	15512	15314	16342	16800	19910	16464	14890	15198	17372	18772	15382	510140	11726.7	1717.93	13898.7	947.988	14538.3	2109.55	10832.7	1392.22	16594.7	1716.28	16346.3	1504.61
2.1.1.137	13846	10540	11048	14990	13142	15936	16598	18458	15942	17628	18562	16502	16466	12758	10444	11178	10272	10338	10278	8960	11064	11836	8550	7144	17580	16802	16848	15956	15650	21258	14838	14330	13714	15634	15750	14090	504930	11811.3	1780.29	16417.6	1713.63	11909.3	2421.38	9638.67	1739.99	17349	2035.23	14726	833.191
3.2.1.1	8482	7286	6964	12912	11176	13652	13840	15664	13752	14108	15030	14498	17664	14166	12384	13310	13164	12160	9614	8404	10628	12794	8576	6664	16316	15144	15624	15928	16336	20888	19232	17348	17594	19672	21680	17254	499908	7577.33	799.836	13848	1286.88	13808	2020.07	9446.67	2107.92	16706	2097.33	18796.7	1743.23
3.1.6.6	9514	8854	7634	16036	13084	15626	15808	18496	14340	17364	18516	15410	17990	14264	11550	13450	13412	11434	9476	8836	11412	10552	10134	8220	18616	16608	17630	21608	19624	26634	10888	9942	9846	10918	11810	10468	496004	8667.33	953.799	16075.6	1808.11	13683.3	2392.62	9771.67	1166.32	20120	3624.6	10645.3	728.662
2.3.3.13	10962	9340	9144	14290	12524	15176	14572	16456	14108	15400	16450	15440	16564	12626	10598	12054	10214	11492	10740	9272	11494	13126	10428	8964	14998	14524	15386	14284	15736	18972	16596	15126	15844	18148	18630	15618	495296	9815.33	997.866	14935.1	1234.03	12258	2290.81	10670.7	1525.73	15650	1712.99	16660.3	1428.56
4.2.99.18	11192	8396	8444	12226	10576	12708	12386	14022	12176	13240	13470	12678	16222	12250	10618	11570	10772	10508	10620	9290	11778	13954	9898	8432	18160	17084	17664	17020	18192	22598	17036	15358	15684	18260	19880	16068	490430	9344	1600.59	12609.1	979.005	11990	2177.89	10662	1976.03	18453	2092.14	17047.7	1741.63
4.2.1.20	11274	9552	8880	12184	10270	12172	12830	13784	12554	13656	14040	13282	16424	12392	10786	12558	12730	11106	10164	8426	10106	12108	8948	7978	17060	16052	16940	18192	17222	22854	17066	15380	15616	17834	20392	16096	488908	9902	1234.78	12752.4	1155.79	12666	2009.05	9621.67	1503.04	18053.3	2449.01	17064	1872.86
3.6.1.55	9370	8162	7700	11440	9992	12798	12512	14218	12958	13064	13552	12916	16828	13382	11068	13056	12404	11204	9902	9084	10920	12430	8024	6226	17754	16976	17614	17080	16812	22026	17970	16066	16274	18758	21406	16722	488668	8410.67	862.323	12605.6	1232.96	12990.3	2103.12	9431	2181.97	18043.7	1985.6	17866	2020.95
2.1.1.80	8186	10192	7264	16460	14134	17068	16228	19934	15134	15662	16344	16382	18142	15458	13760	15012	14732	15144	9242	7716	9060	13294	9872	9278	12918	12112	12308	15080	13198	17744	12912	12048	12414	14368	16032	12842	487674	8547.33	1497.07	16371.8	1590.87	15374.7	1474.45	9743.67	1879.82	13893.3	2161.34	13436	1497.08
1.2.4.2	11368	9262	9452	13030	11422	13280	12702	14700	12100	13000	13140	13778	16830	12438	11058	13190	13022	11820	10088	8398	10568	13138	10640	9192	14920	15260	15256	13446	15976	18106	17796	16138	16618	18914	20224	16350	486620	10027.3	1164.93	13016.9	934.111	13059.7	2008.17	10337.3	1620.09	15494	1529.06	17673.3	1629.87
3.1.26.11	12520	9796	9790	12600	11076	13720	13692	15892	14270	13876	14826	13454	13818	10932	9186	10106	9314	9342	11400	10236	12386	11596	8630	6654	19688	18074	19200	19206	17460	22928	15046	14392	14196	15464	16236	14684	485686	10702	1574.44	13711.8	1350.17	10449.7	1778.2	10150.3	2153.74	19426	1903.95	15003	756.438
4.2.1.33	11312	10032	9214	14708	13096	15370	15540	17390	14606	16250	16746	15798	16814	12800	10846	12972	11972	11722	9812	7950	10152	11628	9708	8858	14506	13368	14202	15736	14488	19206	15026	13720	13966	15910	16142	14064	485630	10186	1057.44	15500.4	1274.76	12854.3	2087.58	9684.67	1241.3	15251	2081.37	14804.7	1047.63
3.1.7.2	12792	10126	10358	12142	11164	12612	12716	14200	13018	13074	13810	13448	17004	12822	11054	13094	13492	10878	10456	8948	11118	12142	9580	8484	17102	16248	16752	16574	16414	20906	15796	14522	14602	16112	17440	14610	485610	11092	1476.81	12909.3	906.013	13057.3	2217.42	10121.3	1381.24	17332.7	1775.11	15513.7	1164.44
4.2.1.35	11306	10030	9210	14708	13096	15370	15540	17388	14602	16250	16740	15798	16814	12796	10844	12972	11972	11720	9810	7950	10152	11628	9708	8858	14506	13368	14202	15736	14488	19206	15000	13694	13942	15886	16106	14050	485446	10182	1056.23	15499.1	1274.01	12853	2088.2	9684.33	1241.26	15251	2081.37	14779.7	1043.5
2.7.10.3	10622	8522	8500	13416	10986	13992	14190	16860	14296	14026	15382	14894	17504	12878	10848	13534	13326	10804	9748	8180	9556	13904	7960	6490	17432	16202	16954	17576	15932	22212	14238	13146	13376	15106	17382	14146	484120	9214.67	1218.84	14226.9	1580.16	13149	2450.01	9306.33	2545.93	17718	2296.51	14565.7	1545.18
3.5.4.31	12482	9046	9976	14830	13318	15884	16108	17540	15352	16360	17222	15100	16796	13936	10918	12912	12124	10862	11964	10102	12720	11516	9964	9270	16574	15676	16030	16690	15420	20184	10480	10290	10016	10780	11222	10624	480288	10501.3	1777.22	15746	1286.03	12924.7	2233.05	10922.7	1340.95	16762.3	1747.39	10568.7	416.059
3.5.4.28	12482	9046	9976	14830	13318	15884	16108	17540	15352	16360	17222	15100	16796	13936	10918	12912	12124	10862	11964	10102	12720	11516	9964	9270	16574	15676	16030	16690	15420	20184	10480	10290	10016	10780	11222	10624	480288	10501.3	1777.22	15746	1286.03	12924.7	2233.05	10922.7	1340.95	16762.3	1747.39	10568.7	416.059
2.6.1.1	13242	10050	10622	12350	10772	12898	13074	15056	13656	13304	14468	13056	18072	13474	11248	13326	14386	11838	9710	8122	10118	11376	8936	7622	15904	15012	15116	18442	17138	21554	13912	12194	12626	14040	15066	12764	474544	11304.7	1701.98	13181.6	1225.45	13724	2418.75	9314	1377.08	17194.3	2502.54	13433.7	1086.14
2.6.1.16	11174	9300	9454	13228	11338	13728	13540	14828	13450	13960	15398	13856	17262	13488	11194	13232	13954	11830	9190	8062	10246	11106	8960	7706	15292	14492	14636	16418	15102	20536	14934	13248	13622	15514	17070	13906	474254	9976	1040.35	13702.9	1125.73	13493.3	2123.06	9211.67	1289.26	16079.3	2287.12	14715.7	1430.64
6.3.5.2	12272	9936	10058	12948	11028	12860	12808	14414	12420	13874	14172	13222	15680	12188	9754	12144	12322	10888	10118	8496	10266	11560	9950	9270	15118	14274	14414	15438	15230	18892	15622	14132	14654	16752	19066	14910	471150	10755.3	1314.89	13082.9	1025.22	12162.7	1991.2	9943.33	1029.22	15561	1696.38	15856	1815.13
1.11.1.21	12404	9868	10450	10758	10216	12404	12106	13356	11522	12058	12978	12238	15222	12050	10134	12148	11754	10966	12498	10270	12186	13930	11586	10764	14848	14272	14968	15152	16128	18720	15628	13912	14474	15506	16464	14312	468250	10907.3	1328.42	11959.6	998.039	12045.7	1732.33	11872.3	1311.62	15681.3	1606.41	15049.3	970.863
2.4.1.18	9966	7754	7952	11680	10090	12552	12580	13740	12266	12876	13206	13048	14798	11270	9874	10536	10654	10034	10488	9204	11164	13478	9378	7406	17246	16866	17042	16348	17088	20116	16290	15214	15454	17430	17636	15202	467926	8557.33	1223.95	12448.7	1060.56	11194.3	1833.42	10186.3	2060.61	17451	1341.8	16204.3	1105.23
3.1.1.61	7308	9378	6600	15576	13532	16422	15574	19106	14660	15098	15784	15760	17888	15312	13812	15140	14858	15116	8546	7246	8118	12788	9410	8960	12354	11530	11846	14556	13340	16926	11526	10750	11262	12840	14506	11592	465020	7762	1443.57	15723.6	1512.58	15354.3	1352.71	9178	1917.76	13425.3	2038.37	12079.3	1374.49
2.7.1.11	11472	9564	9672	11726	10216	12678	12662	13876	13358	13242	14348	13048	16922	13498	11044	12426	13258	9918	9834	8782	10566	11732	8578	6748	16302	15334	15740	18482	15958	20418	13622	12618	12756	14274	14442	13002	462116	10236	1071.77	12794.9	1224.06	12844.3	2416.83	9373.33	1736.24	17039	1990.28	13452.3	783.218
2.1.1.250	14140	12420	11756	11404	10868	13590	13664	13828	15806	11948	13606	12570	15632	14564	10440	11814	9092	11676	13174	10918	13400	7742	9868	8628	14336	12794	13936	18314	12532	21950	12176	11986	11298	13472	13898	12490	461730	12772	1230.36	13031.6	1503.78	12203	2471.76	10621.7	2330.52	15643.7	3723.7	12553.3	969.144
6.2.1.5	12346	10068	9752	13354	11916	13846	13498	15438	12864	14074	14658	14014	15948	12466	10334	11886	11172	11226	9772	8214	10238	11398	10458	9680	13186	12432	13200	14306	14248	17348	14528	13646	13808	15374	16836	13832	461364	10722	1415.27	13740.2	1014.01	12172	1984.92	9960	1054.08	14120	1734.3	14670.7	1241.06
1.1.1.18	11710	9946	9112	13916	11730	13552	14566	16896	14228	15808	17054	15052	20302	15142	12712	13776	13982	11564	7752	7752	9858	10298	6642	5582	13992	13164	13900	16078	15134	19036	12250	10932	11298	11670	12600	12244	461230	10256	1326.45	14755.8	1683.8	14579.7	3054.4	7980.67	1819.04	15217.3	2134.61	11832.3	641.201
1.1.1.369	11710	9946	9112	13916	11730	13552	14566	16896	14228	15808	17054	15052	20302	15142	12712	13776	13982	11564	7752	7752	9858	10298	6642	5582	13992	13164	13900	16078	15134	19036	12250	10932	11298	11670	12600	12244	461230	10256	1326.45	14755.8	1683.8	14579.7	3054.4	7980.67	1819.04	15217.3	2134.61	11832.3	641.201
6.5.1.1	6410	5048	5524	14500	12142	14294	13938	16326	12478	15678	15010	15574	15292	12040	10460	11454	8512	10808	8728	8044	10408	12762	9078	7578	15418	15170	15706	13054	16092	18696	15844	14084	14544	16466	17270	14238	458668	5660.67	691.209	14437.8	1418.96	11427.7	2241.88	9433	1898.75	15689.3	1816.08	15407.7	1314.9
2.4.1.83	9928	7380	8018	13656	11538	14050	14274	15950	13994	14598	15626	14426	16444	12926	10024	12736	13326	10694	8100	7078	8810	9328	6894	6130	16962	16474	16882	17590	15480	22042	13024	11944	11780	13376	13388	12274	457144	8442	1325.86	14234.7	1262.3	12691.7	2264.79	7723.33	1228.06	17571.7	2298.33	12631	721.961
3.2.1.68	8028	7366	6340	11330	9900	12038	11560	13864	11610	12056	11902	12540	14268	11068	9306	9474	8266	8922	8892	8478	10416	12890	8026	6308	15880	16050	16372	12916	15336	17400	20228	17992	18688	21184	21954	18130	456978	7244.67	850.516	11866.7	1050.29	10217.3	2190.9	9168.33	2255.96	15659	1507.95	19696	1671.39
1.21.98.3	9374	7606	8340	12208	11128	13862	14790	15780	15884	14482	16318	13180	14396	12992	10120	10758	11534	10414	12718	10880	11748	7450	7696	6320	16762	14366	14350	24750	16030	26426	9814	9490	8870	10536	10338	9916	451626	8440	888.232	14181.3	1760.77	11702.3	1673.49	9468.67	2641.09	18780.7	5382.29	9827.33	600.218
2.5.1.18	13248	8982	9220	17998	15456	17294	17072	21284	13946	17754	17508	16500	16436	11544	9558	11676	10616	10080	9102	7822	9134	12980	10980	9670	10846	10838	11254	8552	12326	12990	11104	9950	10320	11364	14098	10722	450224	10483.3	2397.23	17201.3	1995.71	11651.7	2483.07	9948	1801.86	11134.3	1530.84	11259.7	1481.79
7.2.3.1	11936	10354	9558	12028	10592	12126	11962	13780	11650	13282	13606	13072	16840	13202	10970	12670	13186	11314	8648	7158	9180	9938	8534	7742	13998	13264	13486	14666	13940	17230	15414	14062	13814	16014	16442	14090	449748	10616	1210.46	12455.3	1048.66	13030.3	2092.27	8533.33	992.186	14430.7	1454.17	14972.7	1130.4
2.7.7.8	11968	9746	9928	11976	10410	12642	11980	13720	12148	12602	13474	12754	15854	12024	10754	12448	12412	11154	9792	8306	9652	11720	9980	8598	13242	12306	12976	13546	14002	17108	14716	13544	13992	15452	16722	13884	447532	10547.3	1233.69	12411.8	968.187	12441	1806.97	9674.67	1210.24	13863.3	1687.99	14718.3	1196.3
3.1.11.5	5664	5528	4904	9492	8658	10606	11252	12052	13122	9934	10948	10668	10826	9838	8828	9900	10804	8920	10820	9924	10706	10600	8348	6432	18504	17424	17848	18686	17116	23438	16358	15418	15606	18108	23290	16464	447034	5365.33	405.272	10748	1335.34	9852.67	868.87	9471.67	1750.52	18836	2334.07	17540.7	2972.65
1.17.1.4	10900	8644	9040	14904	13236	15574	15792	17618	14582	17268	17782	16046	14330	12258	9794	10464	9082	10454	8930	7482	8584	10356	9192	8842	13386	12840	13260	15728	13846	19292	9990	8984	8780	10068	10430	9306	437064	9528	1204.57	15866.9	1513.29	11063.7	1916.54	8897.67	929.517	14725.3	2454.73	9593	663.027
3.1.3.16	10852	8882	8768	12604	10852	13288	12462	14188	12688	12542	12896	12530	16684	13706	11758	12690	12534	10922	9390	7754	9600	11050	9428	7932	13842	13108	13050	16068	14020	18520	11792	11170	11468	12902	12950	11608	436498	9500.67	1171.68	12672.2	875.095	13049	2011.46	9192.33	1214	14768	2139.7	11981.7	759.334
7.1.1.1	13610	10522	10180	11122	9580	11164	10930	12692	10402	12532	12280	12200	14412	10536	9608	11188	11016	9470	9528	7864	9678	12366	10114	9212	12548	11930	12604	12388	13580	15664	15702	14156	14684	16634	18158	14178	434432	11437.3	1889.34	11433.6	1061.68	11038.3	1797.91	9793.67	1474.14	13119	1358.59	15585.3	1585.43
6.3.2.4	10884	8732	8788	11938	10344	12536	13488	14686	12932	14058	14788	12984	14394	11536	10100	12054	12892	10324	8230	7084	8482	9702	7858	6896	13418	12028	12272	15624	13046	18288	12902	12126	11900	13632	14778	12586	428310	9468	1226.61	13083.8	1402.51	11883.3	1617.56	8042	1024.64	14112.7	2411.3	12987.3	1069.08
2.1.1.79	9820	7710	7864	13562	11800	13556	14184	16396	13208	14828	15594	13880	13488	9752	8328	9332	9098	8680	9228	7272	9230	9996	9362	7840	15816	14954	15816	13472	15018	18598	11946	11084	10960	11608	13262	11270	427812	8464.67	1176.28	14112	1358.25	9779.67	1883.3	8821.33	1036.15	15612.3	1694.98	11688.3	850.878
2.3.3.1	11860	8890	9642	12588	11004	12556	12766	14496	12030	13446	14144	13366	14164	10508	9440	10706	10340	9806	8294	7014	8282	10386	9064	7650	14134	13136	13580	13534	13994	16954	13172	12184	12210	13764	14978	12582	426664	10130.7	1544.12	12932.9	1071.54	10827.3	1700.31	8448.33	1173.01	14222	1384.81	13148.3	1082.44
1.16.3.3	15370	12770	11518	13058	11348	13894	13982	15568	14422	15920	16766	15344	17316	14642	11546	13628	10942	12082	6442	5576	7536	7308	5808	5178	11716	11754	11644	8370	9586	11766	11940	10922	10750	12286	12596	10962	422256	13219.3	1964.92	14478	1645.29	13359.3	2372.17	6308	957.984	10806	1467.87	11576	795.485
4.2.1.2	10522	8472	8570	10948	9944	11580	12436	13418	11930	13000	13176	12972	14862	11272	9470	11294	10414	10272	8454	7384	9096	9336	8142	6870	12856	12258	12938	13890	13588	17622	14168	12794	12724	14408	16798	13010	420888	9188	1156.32	12156	1163.22	11264	1890.59	8213.67	958.627	13858.7	1931.43	13983.7	1554.64
2.3.1.179	9860	8008	7970	12822	11720	13962	14204	16114	14154	15014	16192	14588	15582	12756	9826	11392	11750	10258	9242	8006	9276	9376	7228	6300	13578	12518	12574	14110	13186	17468	10048	9290	9364	10444	10700	10040	418920	8612.67	1080.39	14307.8	1433.88	11927.3	2076.71	8238	1281.43	13905.7	1846.95	9981	565.238
2.10.1.1	10918	8406	8254	10712	9424	11966	12252	12766	12702	12076	12962	12176	14692	11704	9230	11202	11196	9514	9382	7696	9660	10018	7296	5398	13928	13838	13856	13026	12468	16842	13920	12962	12860	14640	15728	13204	418874	9192.67	1496.11	11892.9	1134.56	11256.3	1957.17	8241.67	1774.59	13993	1511.59	13885.7	1125.54
1.2.4.4	12662	9058	9744	11738	9930	12284	12562	13500	12120	13094	13662	13966	16914	12368	10302	12676	12248	10866	7384	6810	8194	10342	8008	7198	12130	11860	12656	12188	13986	14984	12656	11590	11466	12512	13228	11724	418610	10488	1913.73	12539.6	1235.85	12562.3	2326.94	7989.33	1261.8	12967.3	1243.88	12196	707.022
5.4.2.8	8832	7644	7194	10408	9180	11380	10932	11936	10730	11456	12016	11222	12554	9720	8176	10042	10198	8622	8060	7330	8944	10884	7442	6532	14808	14270	14962	14156	14584	17100	16594	14730	15322	17248	19024	14328	418560	7890	846.255	11028.9	869.112	9885.33	1535.53	8198.67	1542.12	14980	1082.98	16207.7	1769.99
5.3.1.9	9690	7340	8116	10804	9602	11920	12074	12884	12240	11880	12684	12642	14210	11522	9950	10664	10520	9668	8762	7722	9352	11000	7522	6090	14700	13994	14534	14708	14096	18662	13142	12024	12336	13414	15466	12612	418546	8382	1197.37	11858.9	1045.64	11089	1658.26	8408	1694.91	15115.7	1763.61	13165.7	1237.1
3.1.4.46	8918	6658	6948	10240	8564	10822	10634	12684	10718	10590	10774	10878	14978	11346	9302	10640	9710	8434	9352	7886	10014	11352	7840	6352	16424	15606	16646	14902	15486	19264	13846	13086	12616	15190	15932	13204	417836	7508	1229.67	10656	1046.53	10735	2314.48	8799.33	1791.14	16388	1547.42	13979	1308
4.2.1.46	11246	8334	9048	9838	8632	10462	11362	12438	11260	12226	12836	11950	14562	10722	8822	11216	12020	9204	8292	7446	9118	10150	6812	5888	14956	13600	13590	15520	14282	18850	13140	11406	11938	13318	14750	12102	411336	9542.67	1517.71	11222.7	1362.16	11091	2086.71	7951	1557.05	15133	1972.43	12775.7	1212.96
1.1.1.42	11872	9658	10024	9980	8912	10732	10658	11564	10668	10898	11004	11076	16284	11978	10516	12728	12594	10418	8592	7294	8840	11712	9224	8412	11304	10932	11370	11750	12922	14186	13770	12396	13074	14346	16070	13090	410848	10518	1186.79	10610.2	763.717	12419.7	2139.36	9012.33	1473.26	12077.3	1239.13	13791	1300.29
4.2.3.1	10350	7804	8368	11382	9548	11832	11644	12690	11530	12468	13158	11860	13852	11758	9288	10786	10024	9378	9092	7770	9358	9618	8210	6900	13300	12796	13404	14332	13498	17752	12320	11196	11048	12200	12710	11596	404820	8840.67	1337.19	11790.2	1026.51	10847.7	1739.51	8491.33	1050.06	14180.3	1818.76	11845	666.076
2.1.1.72	7520	6994	6388	9574	8090	9530	8976	10566	8874	8414	8800	8666	15336	11762	11558	13184	17906	9882	6206	5614	7006	7752	6160	5658	14492	13032	13088	14560	15110	16370	15412	13900	14990	16570	20318	15276	403534	6967.33	566.471	9054.44	739.557	13271.3	2913.82	6399.33	831.713	14442	1265.01	16077.7	2246.5
6.1.1.3	10814	8254	8910	11380	9726	11392	11298	12922	11012	11522	12218	11758	14614	10936	9556	10786	11032	9454	8306	7294	8574	10120	8648	7486	12456	11624	11824	13248	12596	15524	13350	11620	12274	13508	15042	12280	403358	9326	1329.73	11469.8	869.52	11063	1874.21	8404.67	1011.68	12878.7	1419.81	13012.3	1224.69
1.2.1.16	10076	7234	7566	11960	10514	12564	11624	13338	11134	12490	12510	12308	14036	10566	8704	10138	8776	10140	7370	6148	7802	10784	8176	7296	10770	10696	11310	10578	12048	13752	14630	12922	13492	15100	17290	13210	399052	8292	1553.88	12049.1	850.208	10393.3	1944.11	7929.33	1556.49	11525.7	1219.29	14440.7	1631.57
2.7.4.1	9058	7064	7498	10256	9162	11112	10532	12024	10852	11018	11086	11264	15050	10492	9026	10912	11094	8754	7906	6794	8566	11148	8268	7282	13576	12990	12932	11740	13308	15762	13408	12304	12250	14222	16772	12636	398118	7873.33	1048.65	10811.8	789.968	10888	2260.22	8327.33	1525.65	13384.7	1323.62	13598.7	1727.24
1.2.1.20	9948	7156	7490	11816	10356	12368	11464	13146	10992	12306	12330	12126	13810	10402	8606	10000	8642	10010	7316	6092	7746	10662	8108	7228	10742	10660	11268	10544	12000	13696	14444	12714	13286	14876	17082	13006	394438	8198	1524.72	11878.2	834.688	10245	1902.9	7858.67	1532.77	11485	1209.88	14234.7	1630
1.2.1.79	9948	7156	7490	11816	10356	12368	11464	13146	10992	12306	12330	12126	13810	10402	8606	10000	8642	10010	7316	6092	7746	10662	8108	7228	10742	10660	11268	10544	12000	13696	14444	12714	13286	14876	17082	13006	394438	8198	1524.72	11878.2	834.688	10245	1902.9	7858.67	1532.77	11485	1209.88	14234.7	1630
2.7.1.107	7948	6336	6628	10026	9316	11356	11214	12144	11410	10798	11096	10652	13156	10372	8130	9318	8678	8244	8452	7640	10114	9898	6178	5304	14228	13070	13602	14186	13094	18148	13538	12804	12704	14356	16496	12860	393494	6970.67	858.895	10890.2	828.897	9649.67	1905.55	7931	1947.55	14388	1909.63	13793	1464.43
1.97.1.4	10358	8380	8628	8108	7280	9492	9702	10050	10822	9598	11222	9552	10630	9354	7814	9150	10202	8280	10288	8544	10206	8128	6856	5384	15252	13878	14436	19242	14350	21258	13190	12336	11916	13670	13596	12174	393326	9122	1077.57	9536.22	1220.8	9238.33	1080.16	8234.33	1909.79	16402.7	3079.46	12813.7	765.522
5.4.3.8	10396	9304	8230	10052	8934	10704	10680	11802	11042	11110	12124	11410	14702	11528	9264	10582	10468	9592	7776	6906	8716	8984	6768	6400	11420	11232	11374	10934	11364	14256	14324	13080	13332	15106	16032	13360	393288	9310	1083.01	10873.1	955.295	11022.7	1971.52	7591.67	1077.53	11763.3	1233.89	14205.7	1175.22
3.5.2.3	10196	7710	8236	10784	8928	11028	11026	12892	10322	11702	11900	11622	13274	10160	8720	10180	11214	8626	8372	7248	8752	10396	8124	6644	13332	12472	12948	13100	13656	16588	12492	11518	11474	12452	13618	11484	393190	8714	1310.12	11133.8	1112.95	10362.3	1731.44	8256	1301.62	13682.7	1477.13	12173	855.567
1.2.1.88	10846	8536	8244	9834	8794	10434	10442	12252	10640	10560	11466	11096	15082	10752	9612	11374	11488	9386	8230	6726	8314	10928	9408	8288	12224	12102	12334	12120	13250	15594	11924	10504	11230	12492	14242	11020	391768	9208.67	1425.47	10613.1	976.45	11282.3	2056.96	8649	1406.13	12937.3	1370.72	11902	1342.24
1.1.5.3	8202	6784	6714	9626	8456	10800	11012	11540	10992	10322	11100	10474	13620	10084	8704	9496	8942	8434	8400	7412	8954	10974	7118	5618	13966	13504	13506	13678	13272	17750	13636	12090	12634	14328	15856	12976	390974	7233.33	839.62	10480.2	935.846	9880	1925.12	8079.33	1826.18	14279.3	1715.76	13586.7	1358.11
3.4.13.9	10430	7484	8280	12360	10960	12434	12940	14356	12094	13504	13790	12436	13650	10282	8278	9660	8882	8396	8694	7376	9150	10050	9256	8696	11820	10892	11366	13370	12624	15906	9918	8856	9012	10180	10414	9444	387240	8731.33	1523.98	12763.8	1015.43	9858	2009.21	8870.33	884.656	12663	1819.22	9637.33	634.882
6.1.1.10	10154	8618	8376	9582	8460	9898	9992	11788	9948	10488	10940	10604	14082	10466	8828	11484	12008	9706	8344	7114	9062	9736	7828	6550	11850	11706	11976	13384	13172	15800	12582	11506	11302	13008	13892	11862	386096	9049.33	964.291	10188.9	930.181	11095.7	1863.94	8105.67	1192.47	12981.3	1553.09	12358.7	991.25
2.7.1.17	7416	6430	5988	8458	7938	10340	11056	11184	12058	10778	11810	10980	14946	12148	8866	9870	9774	8584	8284	7258	9408	9642	4866	4098	14546	13822	14124	15108	13532	18862	12562	11692	11092	12898	13338	11536	385292	6611.33	731.066	10511.3	1413.6	10698	2429.51	7259.33	2326.62	14999	1971.95	12186.3	876.219
1.4.1.2	10002	8178	7726	10140	8694	10184	10044	11386	9280	10690	10630	9958	12284	9466	8144	9656	8848	8472	8044	6758	9210	11008	10076	8696	11736	11522	11732	10404	13062	14152	14626	13100	13568	14850	15308	12768	384402	8635.33	1204.95	10111.8	787.618	9478.33	1489.56	8965.33	1500.64	12101.3	1312.6	14036.7	1032.63
7.1.1.7	5570	5076	4696	10278	9164	10594	10782	11700	11418	10702	11546	11442	11650	9044	7940	9416	9604	8452	7698	6814	8118	8168	6760	5054	14842	13854	14094	17368	14448	20280	12312	11372	11584	13558	16486	11458	383342	5114	438.237	10847.3	801.7	9351	1284.29	7102	1176.27	15814.3	2528.67	12795	1985.85
6.3.4.14	8948	7040	7014	9876	8988	10644	10234	11610	9668	11576	11966	11226	12450	9792	8350	9280	9370	9074	7368	6462	8004	9516	7566	5890	12020	11320	11782	13110	12964	15700	14418	12582	12874	15002	16260	12934	382878	7667.33	1109.17	10643.1	1021.09	9719.33	1419.04	7467.67	1265.17	12816	1572.68	14011.7	1462.91
3.5.1.11	9222	6730	7188	9236	7930	9672	9532	10290	9400	10134	11010	9832	13480	11650	9112	10816	10870	9186	8492	7260	9568	10838	7566	6460	13908	12858	12950	14436	13984	17472	11642	10772	10926	11462	12086	10714	378684	7713.33	1326.46	9670.67	846.274	10852.3	1633.89	8364	1616.63	14268	1686.97	11267	550.732
3.13.2.1	10056	8560	8178	10448	9292	10820	10696	12194	10400	11306	11500	11132	13896	10598	9048	9856	9956	8802	7822	6510	8064	8978	8574	7812	11170	10510	10954	11190	11492	14028	12524	11434	11922	12830	13906	11700	378158	8931.33	992.541	10865.3	816.262	10359.3	1850.72	7960	844.699	11557.3	1253.34	12386	907.61
3.4.14.5	11550	7986	9020	8002	6778	8582	8660	9256	8306	8616	9312	8276	13736	11510	9080	10698	13336	7890	8078	6798	8596	10666	7672	5752	15066	13352	13506	21256	18802	21972	9514	8614	9090	9354	9394	8880	376956	9518.67	1833.58	8420.89	751.784	11041.7	2308.33	7927	1675.87	17325.7	3865.27	9141	345.531
2.5.1.47	11442	8828	8958	10964	9498	11452	11670	13290	11306	12024	12914	11956	13300	10192	8390	9700	8756	8252	8124	6462	8630	9364	8288	8010	11138	10390	10962	11520	11298	14610	11092	10024	10374	11014	12284	10220	376696	9742.67	1473.1	11674.9	1105.38	9765	1891.07	8146.33	958.413	11653	1498.36	10834.7	830.2
4.3.1.19	10742	8082	8518	10220	8552	10326	10438	11866	9974	11300	11764	10648	13410	9796	8010	9598	9182	7734	7960	6930	8662	10828	8526	7766	12702	12374	12258	11458	12756	14264	11360	10552	10622	11664	12094	10458	373394	9114	1426.64	10565.3	1016.8	9621.67	2036.49	8445.33	1320.9	12635.3	923.943	11125	679.843
4.1.2.13	9014	7232	7780	8856	7850	9458	9600	11244	9896	10466	10954	10792	12320	9362	7958	9946	9962	8722	7676	6956	8518	8812	6744	5778	13136	12106	12582	12118	11784	15580	13750	12258	12358	14816	14540	12258	373182	8008.67	912.742	9901.78	1096.08	9711.67	1489.83	7414	1146.91	12884.3	1401.8	13330	1190.95
2.7.1.40	9078	7212	6876	9522	8236	9914	9770	11322	9856	9828	10290	9994	12982	9418	7990	10156	10824	8360	8132	6998	8444	10912	7572	6592	13078	12100	12654	12260	12508	15660	12314	11464	11478	12558	12726	11724	370802	7722	1186.29	9859.11	798.747	9955	1824.93	8108.33	1535.81	13043.3	1325.88	12044	558.816
2.6.1.42	10656	7582	8210	10184	8978	10532	11146	11998	10620	10970	11390	11030	13416	10052	8532	9462	9752	8718	8336	6760	8284	9616	7678	6876	11034	10292	10782	11806	11468	15000	11940	10742	10832	11926	12716	11156	370472	8816	1624.13	10760.9	849.589	9988.67	1778.79	7925	1065.45	11730.3	1686.31	11552	771.574
7.2.1.1	13124	9960	9966	7606	6862	8606	8576	10228	9560	8290	8740	9106	14502	10006	8922	13292	15890	8832	8336	7078	8436	12662	9014	8528	11612	10638	10934	14828	14452	17092	9262	8148	8662	7866	7834	8430	365880	11016.7	1825.01	8619.33	996.848	11907.3	3049.47	9009	1901.88	13259.3	2590.94	8367	543.152
1.2.1.3	8340	6602	6808	11730	10190	11932	11008	12952	10120	12198	11512	12300	12278	9414	8028	9922	8646	9384	6630	5836	7360	10488	6804	6444	11222	11056	11602	9656	11744	13064	11314	10032	10574	11668	13936	10572	363366	7250	949.57	11549.1	956.297	9612	1465.4	7260.33	1657.01	11390.7	1106.26	11349.3	1395.31
2.7.2.4	10818	8148	8678	8714	7898	9238	9198	10826	9230	9424	9598	9754	13524	9234	8340	11418	12828	9150	8032	6628	8106	10248	7616	6606	10992	10412	10744	12314	12630	14720	11404	10632	10894	11364	12110	10504	361974	9214.67	1413.59	9320	787.68	10749	2150.62	7872.67	1337.28	11968.7	1612.66	11151.3	597.173
6.1.1.6	8904	7112	7452	9234	7876	9912	9630	11050	9126	9774	10308	10080	11862	8854	7884	9412	10158	8064	7558	6414	7748	9062	7060	5936	11314	10912	11014	12086	12206	14680	13140	11882	12122	14034	15350	12160	361370	7822.67	951.767	9665.56	884.224	9372.33	1484.1	7296.33	1102.26	12035.3	1403.66	13114.7	1360.79
6.5.1.2	9316	7022	7324	9438	8434	10356	9610	11132	9754	10098	10866	10070	11290	8634	7366	8774	9460	7752	7668	6644	8072	9104	7078	5644	11966	11318	11840	12618	12666	15706	12338	11228	11368	12750	14566	11454	360724	7887.33	1246.44	9973.11	802.101	8879.33	1398.63	7368.33	1198.31	12685.7	1564.03	12284	1270.49
1.3.99.16	12108	8722	9264	7826	7038	8472	8602	10286	8080	7990	8380	7966	11042	8118	6690	7892	8252	6578	8672	7492	8380	11678	8424	7590	15206	15466	15638	14612	16068	17840	10362	9672	9322	9824	9756	9820	359128	10031.3	1818.75	8293.33	876.382	8095.33	1614.09	8706	1532.25	15805	1107.72	9792.67	335.649
2.7.3.9	6518	5808	5522	9844	8958	10750	10728	11852	11482	11066	12284	12012	9970	8320	6792	7150	7552	7072	7268	6622	8020	8132	7310	6130	16028	15180	15124	13626	13256	17312	10328	9660	9652	10692	11198	9820	359038	5949.33	512.821	10997.3	1076.91	7809.33	1183.96	7247	777.622	15087.7	1505.54	10225	630.398
1.2.7.8	9898	8018	7418	9624	8916	10264	10556	12194	10552	10896	11554	10156	11690	9288	7830	10472	11408	8556	8160	6542	7982	8168	7446	6682	11090	10606	11094	14704	11940	16010	9956	9546	9566	9738	10262	9326	358108	8444.67	1293.88	10523.6	973.953	9874	1566.34	7496.67	735.375	12574	2236.54	9732.33	334.096
6.1.1.12	9956	7652	8108	9162	8126	9720	9448	10612	9790	10204	10126	9778	12040	9554	8140	8974	9488	8290	7242	6358	7570	9264	7148	6380	11700	11324	11738	12324	12490	15712	11610	10566	10652	11754	13494	11174	357668	8572	1220.07	9662.89	715.878	9414.33	1414.28	7327	1066.4	12548	1608.59	11541.7	1071.44
3.2.1.40	4962	4762	3984	9460	8850	11446	11304	12058	13476	11506	11778	12972	12012	8668	7126	8828	9764	8006	4108	4292	5316	5378	3582	3086	18116	17882	17968	21408	18258	23892	6922	6364	6592	7098	7254	7040	355518	4569.33	516.683	11427.8	1484.86	9067.33	1689.28	4293.67	918.733	19587.3	2502.29	6878.33	335.841
6.1.1.16	8522	6898	6866	9058	7752	9322	9616	10868	9280	9854	10654	10070	11592	8888	7450	9396	9474	7880	8186	6890	8298	9072	6806	5826	11854	11366	11380	14018	12574	16356	11270	10300	10250	11882	12606	10322	352696	7428.67	946.99	9608.22	928.194	9113.33	1462.35	7513	1202.8	12924.7	1952.14	11105	987.532
2.3.2.13	6926	6458	5624	8088	7094	8840	8800	9720	9070	9036	9172	8848	12194	9226	7546	8276	7994	6968	7322	6476	8342	9508	6726	5364	14496	14000	14564	14118	14174	16582	12172	11252	11260	11844	13410	11102	352592	6336	659.518	8740.89	750.268	8700.67	1870.53	7289.67	1464.06	14655.7	969.087	11840	872.001
1.5.1.54	9304	7648	7752	9174	8474	10320	10718	10964	11456	10612	11526	10672	11180	8948	7636	8382	8856	7904	7652	6756	7884	8086	6756	5642	13084	12018	12168	14878	12846	17750	9204	8698	8652	9588	10188	8786	352162	8234.67	927.529	10435.1	1008.03	8817.67	1266.49	7129.33	921.827	13790.7	2192.07	9186	608.15
2.7.7.101	8028	6616	6436	8030	7120	8984	9152	9984	9398	8890	9302	8614	10794	8262	7144	9208	10342	7540	7136	6174	7334	8524	6464	5304	11956	11218	11222	13664	13058	16554	12294	11074	11566	12952	14886	11588	346812	7026.67	871.838	8830.44	838.069	8881.67	1489.94	6822.67	1105.44	12945.3	2024.05	12393.3	1386.29
4.1.3.27	9104	6658	7042	9234	8118	9472	9898	10834	9430	10174	10492	9990	11722	9018	7740	9502	9498	8164	7346	6252	7552	9508	7242	6406	11548	11054	12150	10802	11800	14240	10576	9794	10148	10860	12384	10470	346222	7601.33	1315.44	9738	797.885	9274	1396.11	7384.33	1166.11	11932.3	1231.83	10705.3	900.567
6.1.1.15	8892	7366	7242	9030	8104	9468	9440	10550	9412	9794	10586	10012	12306	9260	7886	9500	10184	8320	7276	6608	7686	9034	6998	6480	10898	10334	10716	11598	10982	13778	11154	10070	10130	11044	12556	10408	345102	7833.33	918.926	9599.56	768.388	9576	1572.38	7347	936.541	11384.3	1242.86	10893.7	932.868
2.7.7.80	8980	6706	7014	9024	7746	9796	9730	10830	10054	10302	10656	9832	12804	9562	7738	8990	8830	7596	7448	6328	7452	8358	6258	4992	13014	11958	12338	11710	11248	15330	10744	9876	9662	10552	11434	10152	345044	7566.67	1233.63	9774.44	930.814	9253.33	1897.05	6806	1188.07	12599.7	1464.59	10403.3	646.723
1.5.5.2	8934	7146	6888	8492	7582	9160	9130	10562	9276	8902	9656	9606	12834	8942	7840	9346	9522	7850	7308	6046	7434	9828	8420	7152	11114	11140	11158	10768	11516	14110	10890	9560	10296	11590	13296	10066	343360	7656	1114.27	9151.78	823.647	9389	1836.04	7698	1288.97	11634.3	1235.76	10949.7	1345.97
3.1.3.25	8750	6622	6622	9706	8132	9726	9948	11240	10012	10526	10936	10182	11896	8496	7150	9074	9090	7632	7082	6004	7056	8524	6918	5516	11968	11344	11712	12440	11376	15396	10430	9396	9966	10632	11680	9924	343104	7331.33	1228.6	10045.3	891.542	8889.67	1665.85	6850	1039.08	12372.7	1536.02	10338	786.512
1.17.1.10	9876	7774	8112	9816	8782	10916	11208	11748	12292	11146	12780	10842	11358	9160	7428	7964	7666	7270	9162	7282	8842	7524	7248	6108	10656	10374	10486	12224	11420	14806	8682	8406	8272	8368	8508	8550	343056	8587.33	1128.74	11058.9	1213.67	8474.33	1564.91	7694.33	1130.12	11661	1691.93	8464.33	145.808
6.3.4.2	9324	7716	7786	8980	8076	9094	9116	10408	9098	9844	10146	9874	12382	9366	7994	9532	9718	8520	7196	5970	7316	8864	7340	6562	10174	9580	9698	11186	10806	12922	11294	10416	10756	11754	13032	10526	342366	8275.33	908.846	9404	723.63	9585.33	1520.34	7208	971.754	10727.7	1242.19	11296.3	988.166
3.4.11.9	9658	7370	7482	9940	8720	10164	10616	11684	9806	11942	12028	10140	11212	8830	7580	8882	9892	8014	6706	5866	6990	7820	6546	5566	11182	10648	10852	12448	11774	14878	9240	8844	9100	9712	10720	8966	341818	8170	1289.86	10560	1118.21	9068.33	1318.48	6582.33	807.551	11963.7	1571.09	9430.33	699.616
3.1.3.1	6510	5680	5154	9470	8250	9800	9712	11974	9306	9228	9724	9536	12304	9236	8020	9638	9946	8272	7300	6650	7974	9096	6848	5370	12530	12114	12328	12228	13700	15514	9300	8196	8388	9752	11510	8770	339328	5781.33	683.656	9666.67	983.114	9569.33	1537.51	7206.33	1263.25	13069	1329.29	9319.33	1218
2.3.1.61	7724	6106	6042	8086	7172	8718	7982	9120	8090	8444	8410	9124	10794	8016	7036	8822	8742	7908	7260	6146	7576	9300	6752	5598	10666	10906	11216	10142	11738	13424	14164	12422	12492	14514	15714	12546	338912	6624	953.165	8349.56	612.397	8553	1275.61	7105.33	1294.54	11348.7	1148.41	13642	1366.61
6.1.1.19	9176	7144	7284	9146	7870	9432	9210	10274	8964	9716	10088	9542	11510	8676	7502	9376	9782	7906	7428	5976	7536	8502	6988	5744	10454	10598	10674	11674	11350	14296	10644	10004	10276	11252	12772	10110	338876	7868	1134.92	9360.22	704.95	9125.33	1449.45	7029	1034.19	11507.7	1446.38	10843	1047.91
3.4.19.1	11572	7964	8606	6542	5672	7208	7500	8270	7096	8164	8594	7610	13838	10596	8882	10246	10716	7524	7230	6112	7188	9560	7110	6318	12194	11042	11446	16110	14856	17518	9472	8974	8936	9412	9512	8982	338572	9380.67	1924.71	7406.22	913.196	10300.3	2121.22	7253	1226.67	13861	2682.52	9214.67	276.867
3.2.1.20	5930	4926	4742	6450	6170	8560	7478	8244	8872	7446	8072	8926	12764	9084	7758	9404	10352	7348	6504	5874	7780	10686	5246	4374	12868	12514	12598	12866	12864	16096	12934	11396	11424	13578	14678	11582	338388	5199.33	639.429	7802	998.383	9451.67	1960.28	6744	2248.91	13301	1377.92	12598.7	1360.52
1.3.8.1	9078	6864	7348	8920	7514	9690	9974	10956	9476	10420	11080	9998	10112	8292	6716	8256	9196	7454	7324	6156	7862	7938	5798	4924	10580	9946	10280	13452	10888	15754	10578	9860	9940	10894	12980	10254	336752	7763.33	1163.97	9780.89	1092.17	8337.67	1208.67	6667	1227.15	11816.7	2299.1	10751	1159.09
4.1.99.3	7592	5598	6232	6938	6104	7108	7046	8152	7120	7418	7562	7580	10376	7578	6418	8304	8520	6572	8900	7918	9630	13072	8280	7096	13484	12790	13344	13004	13986	16644	10996	10382	10040	11354	12288	10180	335606	6474	1018.79	7225.33	562.576	7961.33	1464.19	9149.33	2105.64	13875.3	1417.77	10873.3	856.03
4.1.1.31	7578	6474	5820	7760	7000	8300	8224	9728	8444	8148	8454	8670	11654	8888	7494	9128	9648	7036	7002	6296	7828	10396	7086	6126	11816	11388	11930	9586	12090	12884	12078	11250	11080	12398	13634	11220	334536	6624	888.547	8303.11	727.232	8974.67	1650.09	7455.67	1564.58	11615.7	1108.51	11943.3	983.105
6.1.1.17	8444	6424	6748	8856	7714	9054	8818	10286	9172	9100	9632	9474	12416	8962	7538	9836	10008	8300	6798	6030	7150	8910	6392	5540	10554	9984	10896	11452	11046	13880	10920	9514	10254	11260	12478	10042	333882	7205.33	1084.88	9122.89	697.508	9510	1700.14	6803.33	1176.56	11302	1356.14	10744.7	1053.55
1.7.5.1	11980	9464	9868	10058	8474	9988	10214	11864	9828	12754	13384	12020	11540	8884	7336	8410	7878	9012	3980	3226	4226	3004	4334	3752	4844	4222	4616	5224	4572	6636	16710	15420	15552	17656	18106	14464	333500	10437.3	1351.17	10953.8	1612.89	8843.33	1462.45	3753.67	538.804	5019	858.46	16318	1412.18
3.1.6.21	6814	5858	5426	6868	6054	7336	7782	8638	8034	7312	7310	7486	16794	11208	9684	11006	10754	6764	7328	6650	7726	8926	5544	4592	12034	11756	12536	8744	11364	12190	11930	11076	10820	12586	12782	11628	331340	6032.67	710.294	7424.44	724.329	11035	3266.27	6794.33	1557.64	11437.3	1377.72	11803.7	789.063
7.2.2.9	7498	6590	6036	9134	8282	9664	9638	10654	9670	9472	10128	9524	13100	10198	8246	10982	10860	9452	5994	5086	6530	8004	6138	5246	10764	10800	10846	8988	10292	12360	10276	9404	9640	10640	10568	9578	330282	6708	738.108	9574	649.086	10473	1636.31	6166.33	1053.94	10675	1084.87	10017.7	542.112
4.2.1.9	7310	6484	5840	8736	7960	9666	9580	10516	9574	9778	10392	9980	10636	8264	7048	8216	8166	7638	7496	6046	7562	8632	6922	5864	10812	10884	11030	10250	10884	12684	10812	9994	10000	11292	12134	10298	329380	6544.67	736.875	9575.78	796.763	8328	1223.46	7087	1037.94	11090.7	826.098	10755	842.764
1.4.1.1	8354	6878	7066	9156	7820	9148	9412	10432	9582	10090	9982	9790	11070	9312	7166	8932	8446	7644	7062	5876	7562	7766	6244	5236	10482	10176	10406	11196	10992	13568	10776	9476	9924	10844	10756	9788	328410	7432.67	803.416	9490.22	759.226	8761.67	1382.41	6624.33	1000.63	11136.7	1250.69	10260.7	600.61
2.7.7.13	7984	6740	6560	8596	7378	8954	9358	10006	8944	9562	10240	9168	10318	8312	6608	8682	9252	7252	6964	5846	7010	8172	5720	5022	11486	11106	11218	11752	10934	14060	10920	9876	10056	11076	12124	10098	327354	7094.67	775.426	9134	841.102	8404	1343.2	6455.67	1138.4	11759.3	1163.52	10691.7	857.117
1.11.1.5	7422	5790	5942	9844	8266	10584	9712	11246	10008	9980	10794	9972	12770	10990	8976	10748	10778	8754	5822	4950	6732	8028	5746	4882	11572	11236	11466	8756	9894	12106	9084	8338	8642	9078	8918	8668	326494	6384.67	901.566	10045.1	838.226	10502.7	1476.67	6026.67	1191.05	10838.3	1258.99	8788	292.175
2.1.2.1	8122	6432	6692	8604	7882	9230	8890	10128	8984	9234	9932	9230	11900	9392	7674	9800	9040	8070	6974	6082	6950	7420	6318	5408	10568	9694	9848	11336	10194	13252	10254	9878	9606	10876	12342	9960	326196	7082	910	9123.78	669.213	9312.67	1499.46	6525.33	730.758	10815.3	1330.32	10486	1007.11
3.2.1.51	7412	7840	6464	6534	5496	7734	7622	8766	8996	8312	8804	8866	12506	9290	7978	10126	13288	7362	5388	5148	6820	6526	3862	3216	12582	11644	12174	20188	16480	20670	8124	7446	7556	7616	7818	7644	324298	7238.67	704.186	7903.33	1205.26	10091.7	2391.99	5160	1423.91	15623	4099.31	7700.67	240.475
1.12.99.6	10022	8060	7592	5888	5086	6224	6414	6714	7026	6458	7288	6702	11802	9020	7468	9238	9628	6820	7696	6588	7910	8142	7032	5958	12888	12548	12692	11196	12364	14776	11432	10798	10434	11596	11248	10786	323534	8558	1289.27	6422.22	650.87	8996	1755.1	7221	846.187	12744	1160.31	11049	446.295
3.4.11.1	7886	6354	6456	7984	6832	8216	8300	9474	8056	8716	9224	8602	11676	8552	7256	8490	8158	6996	7092	6174	7604	8716	7310	6158	10476	10016	10286	9316	11160	12462	11576	10684	10928	11848	12556	10832	322422	6898.67	856.575	8378.22	771.582	8521.33	1674.13	7175.67	961.262	10619.3	1084.63	11404	724.705
2.7.1.90	8142	7084	6814	8196	7272	8842	8830	9620	9268	9566	10172	9292	10564	8506	6812	8038	8496	6750	6814	6038	7414	8160	6254	5000	11330	10634	11046	13294	11532	14272	9974	9156	9172	10318	10328	9306	322306	7346.67	701.884	9006.44	860.328	8194.33	1401.77	6613.33	1107.83	12018	1433.77	9709	562.291
7.2.1.2	8268	7360	7026	4666	4368	5800	6042	6198	6776	5656	6402	5756	7616	6376	5448	7444	10266	6474	9018	7328	9026	8804	6794	5510	16074	14690	14834	18624	15544	20222	10234	9548	9394	9586	9258	9312	321742	7551.33	642.726	5740.44	779.365	7270.67	1666.05	7746.67	1446.13	16664.7	2251.62	9555.33	356.435
7.1.1.11	8268	7360	7026	4666	4368	5800	6042	6198	6776	5656	6402	5756	7616	6376	5448	7444	10266	6474	9018	7328	9026	8804	6794	5510	16074	14690	14834	18624	15544	20222	10234	9548	9394	9586	9258	9312	321742	7551.33	642.726	5740.44	779.365	7270.67	1666.05	7746.67	1446.13	16664.7	2251.62	9555.33	356.435
2.3.1.180	10320	7366	7908	8048	6940	8524	8770	9956	9078	9564	10188	9274	13286	10148	8564	10292	11052	8342	7108	6056	6942	7946	6498	5026	11008	9816	10364	12492	10974	14718	7402	7032	6948	7216	7340	7180	319686	8531.33	1572.56	8926.89	1006.59	10280.7	1808.32	6596	997.042	11562	1786.71	7186.33	174.165
5.3.3.18	7712	5160	5602	10886	9888	10880	10960	12420	9600	11344	11352	11060	10480	7876	6620	7472	6002	7056	6276	5590	7358	8480	6292	5696	10630	11000	11352	8398	11390	11720	8956	8090	8416	8920	9836	8322	319092	6158	1363.83	10932.2	825.109	7584.33	1561.76	6615.33	1108.58	10748.3	1210.1	8756.67	629.413
2.7.7.24	8218	6276	6824	8176	7482	8650	9018	9830	8882	8926	9656	8748	11628	8904	7322	10256	11046	8474	6960	5850	6802	7130	5992	4958	10914	9526	10426	11628	9978	14260	8892	8128	8294	9478	11254	9026	317812	7106	1001.24	8818.67	708.196	9605	1647.75	6282	833.413	11122	1702.16	9178.67	1130.37
1.11.1.24	7486	6280	6090	9850	8418	10056	9562	11542	9330	10212	10778	10052	10880	8256	6960	8214	9310	7516	6666	5784	6654	8056	6530	5610	9884	9384	9834	11236	10670	13508	8674	8010	8146	9090	10458	8286	317272	6618.67	757.116	9977.78	880.011	8522.67	1399.9	6550	867.533	10752.7	1503.6	8777.33	912.345
2.5.1.16	9174	7128	7106	9072	7734	8834	9344	10300	9188	10592	11608	9068	10530	8772	7040	8040	7968	6854	7616	6142	7172	6800	6254	4792	10748	9892	10228	13994	11344	15986	7448	7280	7148	7678	7938	7316	314128	7802.67	1187.66	9526.67	1135.98	8200.67	1341.11	6462.67	988.395	12032	2426.5	7468	291.975
2.8.1.1	7426	5404	6154	9954	8452	10320	9928	11824	9710	10648	11398	10128	10818	8440	6652	7364	6670	6822	6074	5220	6592	7984	6476	5398	10616	10296	10440	9562	10260	12474	9220	8436	8434	9206	10290	8868	313958	6328	1022.17	10262.4	980.298	7794.33	1628.44	6290.67	998.264	10608	982.121	9075.67	689.414
5.4.2.2	6118	5126	5164	7458	6794	8660	8568	9444	8612	8396	9286	9078	9906	7572	6194	8020	8866	6930	6636	6038	6744	7410	5788	4974	11834	11480	11746	12532	11310	14692	10318	9866	10022	10892	11794	9660	313928	5469.33	562.083	8477.33	857.917	7914.67	1336.35	6265	851.334	12265.7	1260.55	10425.3	795.464
1.12.1.3	6888	6534	5524	6220	5642	7222	7128	7486	8492	7172	7982	7552	10742	9110	7500	8682	10226	7242	7394	6530	7910	6834	4892	3716	10926	10342	10544	14174	11090	15568	11072	10250	10148	11546	11790	10404	312474	6315.33	707.803	7210.67	857.298	8917	1410.68	6212.67	1596.29	12107.3	2201.74	10868.3	702.425
2.2.1.2	6684	5148	5586	9200	8318	10188	9994	10950	10436	10688	11114	10192	11660	9736	7218	7868	7264	7530	5856	5152	6126	6484	4918	3882	11982	10884	11018	11500	9940	14582	8218	7640	7922	8604	9764	8164	312410	5806	791.28	10120	881.668	8546	1789.53	5403	949.544	11651	1589.94	8385.33	747.76
1.3.98.3	9084	7050	7462	6284	5614	7100	7326	8322	7412	7708	8126	7402	10286	8094	6976	8388	9440	6494	6606	5348	6844	8742	6530	5138	12132	11302	11268	12332	11708	14224	10186	9300	9628	10546	12022	9714	312138	7865.33	1075.31	7254.89	852.451	8279.67	1435.7	6534.67	1290.89	12161	1097.87	10232.7	980.467
6.1.1.1	9246	7076	7694	8082	7294	8726	8554	9678	8568	8790	9304	8822	11388	8452	7516	9032	9224	7612	6728	5704	6914	7750	6796	6010	9584	9314	9178	9534	9874	11880	9010	8600	8300	9644	12410	8838	311126	8005.33	1118	8646.44	681.602	8870.67	1420.03	6650.33	722.719	9894	1001.93	9467	1510.67
2.7.7.23	7784	6062	5794	7908	6918	8210	8824	9282	8968	8790	9170	8272	11186	8372	7042	8798	9096	7646	6396	5594	6732	7580	5308	4544	10702	10076	10306	11298	10466	14278	9604	8946	9160	10092	11636	9428	310268	6546.67	1079.91	8482.44	746.242	8690	1436.21	6025.67	1090.75	11187.7	1570.49	9811	976.847
2.5.1.54	7700	6156	6294	8422	7592	8158	8636	9596	8230	9608	9888	9124	10462	8030	6724	7634	7002	6894	6786	5702	6620	8236	6388	5656	10190	9900	10402	9686	10058	11894	10300	9754	9640	10692	11770	9858	309682	6716.67	854.382	8806	785.89	7791	1398.69	6564.67	943.025	10355	792.559	10335.7	804.489
2.4.1.25	7156	5308	5780	8146	6932	8486	8372	9670	8584	9050	9832	9092	9620	7558	6448	6968	6762	6460	6026	5396	6686	7530	5118	4400	11288	10984	10832	11108	10484	13742	11350	10286	9858	11778	11594	10156	308840	6081.33	960.144	8684.89	872.927	7302.67	1206.66	5859.33	1131.03	11406.3	1176.2	10837	830.362
2.6.1.17	8062	6502	5940	7822	6992	8404	8082	9188	7856	8510	8682	8556	10440	7638	6598	8538	8728	7564	6616	5566	6752	8462	5798	4750	9756	9460	9700	9588	10496	12128	11602	9866	10126	11284	12540	10142	308734	6834.67	1099.42	8232.44	632.243	8251	1317.71	6324	1278.14	10188	1017.17	10926.7	1055.31
2.8.1.2	7332	5328	6080	9810	8266	10118	9762	11642	9598	10526	11292	9962	10638	8264	6522	7250	6538	6694	5900	5096	6444	7800	6356	5318	10470	10058	10292	9354	10060	12190	9080	8296	8296	9062	10124	8732	308550	6246.67	1012.34	10108.4	988.227	7651	1605.49	6152.33	971.286	10404	953.651	8931.67	679.509
2.4.1.289	6030	4652	4780	6972	6222	7470	7936	8232	8354	8148	8588	8016	11010	8862	6760	8104	9296	6242	5692	5208	7050	6838	3836	3012	13568	12636	12762	12968	11126	15898	10480	9710	9576	10866	10840	9980	307720	5154	761.333	7770.89	756.446	8379	1746.99	5272.67	1610.21	13159.7	1566.53	10242	565.482
2.6.1.9	7898	5948	6530	7840	6930	8274	8418	9308	8000	8436	8798	8756	10318	7926	6102	7852	7496	6896	6666	5654	6874	8560	6252	5376	10376	9814	10328	10126	10636	12770	10050	9358	9766	10918	11994	9514	306758	6792	1001.05	8306.67	678.528	7765	1424.39	6563.67	1133.78	10675	1062.36	10266.7	1009.72
1.1.1.76	6638	4908	4958	11126	9608	11540	11266	12826	10754	12084	12402	11982	9502	7258	5724	5984	4722	6434	5546	4766	6388	7294	5538	5332	10866	10562	11012	8134	10200	12010	7998	7538	7790	8302	9424	7550	305966	5501.33	984.7	11509.8	966.748	6604	1646.56	5810.67	894.252	10464	1293.08	8100.33	709.736
1.1.1.304	6638	4908	4958	11126	9608	11540	11266	12826	10754	12084	12402	11982	9502	7258	5724	5984	4722	6434	5546	4766	6388	7294	5538	5332	10866	10562	11012	8134	10200	12010	7998	7538	7790	8302	9424	7550	305966	5501.33	984.7	11509.8	966.748	6604	1646.56	5810.67	894.252	10464	1293.08	8100.33	709.736
3.2.1.28	3886	3634	3280	11508	9720	10984	11292	13458	9414	13148	12682	11710	8726	6920	6076	6428	5534	7144	5588	5116	6430	7108	5868	4994	8896	8772	8806	9040	9926	12190	10006	9002	8782	10004	10820	8752	305644	3600	304.427	11546.2	1405.39	6804.67	1105.21	5850.67	807.394	9605	1337.12	9561	842.99
1.5.98.2	5086	4312	3772	11158	9904	11678	11012	12462	10296	12538	12518	11626	10818	7798	6500	7088	4704	6260	5500	5324	6678	8048	5086	4618	11108	10650	11334	8008	11542	11914	7852	7212	7390	7662	8302	7578	305336	4390	660.463	11465.8	963.598	7194.67	2052.49	5875.67	1265.98	10759.3	1412.76	7666	381.875
3.1.1.3	5544	4408	4186	5860	5016	6316	6138	6852	6524	5358	5974	5930	9322	7204	6172	6574	6610	5290	6908	5806	7854	10290	5824	5476	11818	11440	12206	10258	12118	13352	13692	12202	12390	13680	16616	12560	303768	4712.67	728.462	5996.44	561.79	6862	1361.05	7026.33	1826.96	11865.3	1015.55	13523.3	1647.78
2.3.1.1	6578	5310	5064	7416	6796	8326	8320	8858	8184	8594	8666	8590	9008	7234	6060	6860	6840	6364	5880	5298	6656	7486	5536	4560	11448	10914	11540	10048	10796	13206	11270	10386	10422	11560	13224	10452	303750	5650.67	812.459	8194.44	668.355	7061	1039.02	5902.67	1037.09	11325.3	1065.74	11219	1100.57
3.6.1.27	6214	5294	5036	7752	6640	7856	7950	9324	7836	8692	9008	8318	9658	7488	5992	8064	8060	6820	5364	4876	6024	7314	4676	3850	10570	10212	10710	10992	10562	13404	11112	10348	10236	11754	14522	10430	302958	5514.67	619.226	8152.89	798.427	7680.33	1251.41	5350.67	1203.39	11075	1168.53	11400.3	1634.48
3.4.21.26	12734	8374	9456	6196	5350	6778	6996	8242	7138	7264	7700	7068	15206	10410	8774	10600	10848	7316	6024	4878	6264	9024	6890	6084	8494	8060	8130	10516	11162	12284	8418	7678	8126	8052	8114	7620	302268	10188	2270.3	6970.22	831.878	10525.7	2660.78	6527.33	1385.96	9774.33	1791.99	8001.33	301.454
1.1.1.3	8076	6322	6538	7330	6516	7894	7962	8706	8258	7956	8728	8250	11462	8566	7206	9284	9842	7120	6748	5534	7080	8010	5712	4826	9850	9106	9672	9834	10250	12640	9580	8900	9044	9988	10616	8782	302188	6978.67	956.436	7955.56	689.699	8913.33	1658.14	6318.33	1169.3	10225.3	1239.7	9485	717.232
3.1.13.1	7648	6168	6136	7936	6880	8704	8204	9272	7926	8138	8854	8320	9958	7678	6788	8120	9296	7034	7430	6054	6898	8318	6606	5592	10938	9866	10508	11642	11142	12990	8178	7864	7764	8620	9852	8154	301476	6650.67	863.864	8248.22	681.489	8145.67	1257.48	6816.33	975.976	11181	1070.3	8405.33	769.172
3.1.26.4	7052	5400	5768	7138	6310	7982	7870	8690	7898	7908	8480	8036	10310	7720	6358	7790	7714	6688	5914	5220	6750	7594	5394	4602	10734	9722	10242	11078	10496	13544	10592	9310	9298	11340	12902	9886	299730	6073.33	867.293	7812.44	709.44	7763.33	1387.22	5912.33	1094.96	10969.3	1342.01	10554.7	1393.1
1.1.1.363	5580	4720	4518	8938	7958	9292	9488	10332	9576	9896	10694	10634	9516	7186	6006	7032	5860	7082	6282	5314	6048	7194	5498	4510	11088	10604	11098	9888	10034	13166	8848	8090	8332	9240	9880	8172	297594	4939.33	563.952	9645.33	874.166	7113.67	1310.17	5807.67	919.588	10979.7	1186	8760.33	702.904
1.1.1.49	5580	4720	4518	8938	7958	9292	9488	10332	9576	9896	10694	10634	9516	7186	6006	7032	5860	7082	6282	5314	6048	7194	5498	4510	11088	10604	11098	9888	10034	13166	8848	8090	8332	9240	9880	8172	297594	4939.33	563.952	9645.33	874.166	7113.67	1310.17	5807.67	919.588	10979.7	1186	8760.33	702.904
3.2.1.4	5694	5762	4582	7344	6746	8376	8222	8926	8488	8202	8718	7990	8832	7124	6060	7432	10568	6632	4660	3920	4800	7020	3706	3078	14278	13694	13540	17346	15996	19168	6758	6644	6696	6552	7232	6728	297514	5346	662.516	8112.44	682.987	7774.67	1655.73	4530.67	1374.72	15670.3	2259.66	6768.33	238.416
2.3.1.269	7782	6060	6158	8622	7596	9364	9352	10598	9150	9442	10534	9230	9252	7158	5886	7236	6420	6908	6254	5490	6898	7240	5626	4640	9944	9602	9826	10662	9832	12536	8576	7908	7784	8996	10422	8290	297274	6666.67	967.149	9320.89	909.759	7143.33	1150.2	6024.67	964.826	10400.3	1107.07	8662.67	968.951
2.3.1.157	7674	5894	5712	7428	6634	7794	8432	8824	8582	8376	8776	7808	10608	7942	6742	8422	8666	7294	6188	5352	6410	7256	5132	4370	10188	9542	9840	10592	9916	13460	9294	8718	8864	9810	11360	9112	297012	6426.67	1084.05	8072.67	722.218	8279	1344.67	5784.67	1032.76	10589.7	1450.07	9526.33	975.76
7.5.2.7	5720	5078	4850	8980	7864	10254	10240	11338	10970	10806	11490	11166	12812	10262	7916	7730	6532	7108	5766	5370	6432	6326	4340	3798	9418	8708	9070	8894	8178	12308	7642	7334	7308	8070	8592	7940	296610	5216	451.119	10345.3	1204.79	8726.67	2372.1	5338.67	1070.03	9429.33	1468.93	7814.33	490.452
1.13.11.24	7946	6204	5984	7588	6736	7934	7868	9330	7690	7996	8174	8272	9942	7174	6290	7672	7626	6220	6160	5248	6478	8686	6110	5544	9280	8694	9314	8620	9906	10936	10434	9536	9972	10872	13190	10004	295630	6711.33	1074.9	7954.22	683.706	7487.33	1357.69	6371	1218.88	9458.33	862.966	10668	1316.33
3.5.1.18	7384	5476	5656	8590	7714	8790	8970	10018	8498	9158	8866	8488	10566	8164	6490	8378	7848	7284	5788	4986	6314	6952	5464	4508	9360	9098	9212	9860	9564	12276	9376	8344	8352	9724	10568	8766	294850	6172	1053.47	8788	618.04	8121.67	1377.04	5668.67	886.872	9895	1197.32	9188.33	873.654
1.1.1.205	7082	5834	5724	8028	7200	8518	8274	9334	8006	8920	9226	8804	10240	7970	6470	7820	7468	7186	6114	5000	6452	6998	5884	4968	9294	8506	9092	9170	9222	11596	9964	8972	9218	10728	11922	9420	294624	6213.33	754.295	8478.89	679.674	7859	1282.04	5902.67	804.356	9480	1074.61	10037.3	1115.5
2.7.1.2	5894	5470	4852	6772	6062	7478	7706	8320	7876	7802	8186	8438	10394	7950	6658	7874	7632	7042	6166	5648	6930	8392	5102	4136	11780	11258	11666	12514	11680	15224	8372	7806	7790	8286	9160	8190	292506	5405.33	524.001	7626.67	770.695	7925	1309.2	6062.33	1482.94	12353.7	1464.3	8267.33	500.962
2.7.4.34	6258	5024	4702	6300	5390	6762	6486	7206	6578	6512	6860	7032	9430	6430	5610	6708	6544	5282	6270	5804	7244	8696	5698	4850	11788	11314	11752	8676	10596	12926	12206	10554	11198	12672	12818	11196	291372	5328	821.338	6569.56	526.152	6667.33	1465.78	6427	1359.93	11175.3	1440.43	11774	920.568
3.1.1.45	8164	5690	6018	10350	8794	10148	10176	11650	9450	11106	11290	10224	10208	7790	6458	6642	5916	6356	5842	4810	5932	7718	6548	5474	9346	9280	9590	7550	9098	10786	7078	6510	6678	7104	8292	6956	291022	6624	1343.72	10354.2	898.823	7228.33	1588.35	6054	995.66	9275	1038.69	7103	627.412
4.3.3.7	7748	5932	6318	9124	7842	9414	9854	10890	8946	10364	10422	9850	9838	7116	5922	7076	6296	6408	5988	5086	5888	7664	5692	4996	8918	8870	8988	8986	9198	11772	8070	7468	7320	8252	9100	7400	289016	6666	956.709	9634	923.278	7109.33	1414.91	5885.67	963.476	9455.33	1140.45	7935	686.801
6.4.1.4	7712	5956	5952	7904	6878	8066	8094	9368	7530	8242	8264	8080	11014	8658	7188	8396	8738	7178	5842	4740	5954	7724	6970	6270	7480	7414	7662	7668	8666	9502	9948	9364	9328	10144	11500	9044	288438	6540	1014.98	8047.33	660.314	8528.67	1405.47	6250	1022.32	8065.33	838.119	9888	890.864
2.7.1.30	6376	5138	5038	7044	6142	7236	7334	8304	7416	7104	7520	7598	10980	8206	7034	8046	7324	6188	6130	5228	6542	8156	5262	4774	10348	10342	10176	10252	10396	12938	9700	8932	8884	9898	10986	9010	287982	5517.33	745.306	7299.78	571.056	7963	1648.65	6015.33	1232.99	10742	1078.69	9568.33	814.956
4.1.1.105	8320	6234	6866	7946	6994	8420	8638	9640	8728	9170	9694	8470	9872	7918	6188	6506	5850	6068	5626	4882	6788	6624	5428	5070	9070	8448	8616	8644	8614	10750	9872	8852	8956	9996	10632	8764	287154	7140	1069.65	8633.33	841.681	7067	1559.4	5736.33	796.879	9023.67	870.854	9512	764.525
4.1.1.28	8320	6234	6866	7946	6994	8420	8638	9640	8728	9170	9694	8470	9872	7918	6188	6506	5850	6068	5626	4882	6788	6624	5428	5070	9070	8448	8616	8644	8614	10750	9872	8852	8956	9996	10632	8764	287154	7140	1069.65	8633.33	841.681	7067	1559.4	5736.33	796.879	9023.67	870.854	9512	764.525
2.7.7.59	7430	6144	6004	8176	7168	7920	8138	9630	7526	8192	8742	8316	9156	6742	6150	6744	6696	5870	6378	5378	6498	7828	6328	5648	9340	9288	9656	8830	9922	11350	9460	8746	8838	9600	10636	8650	287118	6526	786.01	8200.89	703.056	6893	1166.5	6343	853.809	9731	874.551	9321.67	753.729
2.5.1.6	7382	6280	5966	7432	6480	7610	7576	9000	7322	8146	8374	8296	10420	7848	6962	8498	8314	7068	6082	5126	6092	7740	6120	5266	9006	8680	8972	9578	9276	11616	8856	8154	8850	9328	10232	8452	286400	6542.67	743.646	7804	735.497	8185	1262.29	6071	930.545	9521.33	1070.16	8978.67	732.384
2.1.1.77	6832	5642	5406	9184	7824	8786	9192	10508	8808	9474	9794	8798	9308	7258	6112	7314	7170	6274	5660	4842	5980	6864	5938	4902	11054	10456	10820	10210	10154	12606	7346	6910	6854	7264	7502	7144	286190	5960	764.338	9152	749.867	7239.33	1139.55	5697.67	756.898	10883.3	913.087	7170	252.257
4.2.1.11	7936	5866	6068	7704	6894	7926	7448	8764	7216	8136	8578	8222	10226	7518	6350	7702	7634	6544	6112	5108	6122	7202	5774	5292	9252	8590	8930	10392	9746	12578	9248	8352	8354	9626	10124	8394	285928	6623.33	1141.28	7876.44	620.872	7662.33	1383.36	5935	747.648	9914.67	1450.04	9016.33	764.148
3.5.2.9	5996	4772	4684	7610	6962	7436	7744	9294	7362	7708	7980	7366	10022	7552	6410	7254	6962	6206	6128	5344	7182	8564	7048	5890	8912	9108	8924	8314	10464	11318	10250	8974	9070	10514	10704	8998	285026	5150.67	733.401	7718	658.27	7401	1379.63	6692.67	1153.22	9506.67	1137.71	9751.67	821.447
3.5.1.104	7128	5214	5566	7828	6480	7660	8234	9370	7488	9114	9672	8990	11168	8288	6954	7954	7766	6628	4430	3842	4696	5388	4082	3844	9154	8456	8470	9110	8664	11430	10136	9366	9132	10850	11914	9656	284122	5969.33	1018.75	8315.11	1047.16	8126.33	1615.97	4380.33	597.321	9214	1127.45	10175.7	1048.14
3.5.4.10	7080	5698	5974	6966	6162	7436	7204	8034	7306	7898	7980	7770	9888	7340	6434	7668	7974	6468	6106	5104	6412	7392	5722	4656	9500	8788	9200	10228	10232	12488	9184	8542	8460	9700	10648	8530	282172	6250.67	731.361	7417.33	601.052	7628.67	1271.46	5898.67	974.009	10072.7	1313.26	9177.33	868.716
4.3.2.2	7146	5412	5818	7384	6528	7754	7664	8796	7556	7682	8424	8320	9410	7176	6326	7258	7568	6402	5744	4994	5876	6902	5496	4948	9036	8860	9018	9708	9582	11776	9410	8660	8686	9872	10758	8704	280654	6125.33	906.934	7789.78	664.827	7356.67	1120.44	5660	717.45	9663.33	1088.79	9348.33	847.684
2.1.2.3	7064	5682	5942	6922	6104	7388	7150	7976	7250	7840	7908	7718	9826	7322	6394	7620	7930	6406	6084	5066	6350	7364	5710	4652	9416	8686	9132	10138	10146	12410	9148	8510	8406	9658	10596	8452	280366	6229.33	734.439	7361.78	598.4	7583	1266.49	5871	965.791	9988	1316.71	9128.33	871.379
4.1.1.20	6592	5366	5400	7000	6146	7678	7410	8550	7320	7890	8038	7808	9100	7044	5736	7270	7810	6524	6116	5134	6080	7666	5782	4912	9682	9600	9514	10088	10378	12112	9382	8154	8554	9376	10324	8382	279918	5786	698.223	7537.78	687.529	7247.33	1148.75	5948.33	975.768	10229	979.168	9028.67	816.321
2.1.1.64	6630	5026	4950	6634	5810	7048	7452	7722	6826	7282	7884	7016	10226	7614	6624	7576	7296	5886	5618	4936	6020	6718	5060	4252	11738	10876	11068	11254	10344	14620	8678	7828	7730	9066	9582	8266	279156	5535.33	948.77	7074.89	624.398	7537	1473.47	5434	873.031	11650	1525.05	8525	723.637
1.1.1.31	7036	5024	5478	11098	9270	10568	10864	12354	9422	11672	11452	10722	9252	6708	5424	5116	4256	5284	5570	4762	5320	7122	6278	5302	8808	8514	8734	7086	8174	9788	6824	6294	6402	7044	8372	6700	278094	5846	1055.27	10824.7	999.22	6006.67	1774.48	5725.67	842.824	8517.33	884.605	6939.33	753.559
3.1.26.12	7294	5574	5666	6932	6346	7030	6734	8060	6622	7116	7242	6996	9456	6524	6024	6560	6158	5554	6092	5072	6130	8064	6074	5216	8690	8254	8652	7628	8676	10434	10782	9748	10044	11518	13402	10502	276866	6178	967.578	7008.67	479.823	6712.67	1393.5	6108	1067.41	8722.33	933.257	10999.3	1327.77
5.4.99.16	5212	4540	4354	8932	7404	8542	8614	10256	7784	9724	10040	9060	9660	7738	6896	6714	5100	6956	5218	4670	5832	6288	5166	3852	8554	8040	8442	7410	8496	10738	9748	8712	8748	9872	10674	8726	276712	4702	451.358	8928.44	970.186	7177.33	1492.39	5171	857.625	8613.33	1125.84	9413.33	814.693
2.7.7.42	7062	5716	5690	7746	6814	7940	7820	9164	7200	8316	8518	8178	8612	6530	5286	6454	6038	5982	5614	4306	5842	6662	5854	4920	8282	8424	8946	9040	8852	10836	10248	9322	9382	10356	11570	9138	276660	6156	784.727	7966.22	697.46	6483.67	1132.92	5533	819.881	9063.33	918.755	10002.7	920.625
2.7.7.89	7062	5716	5690	7746	6814	7940	7820	9164	7200	8316	8518	8178	8612	6530	5286	6454	6038	5982	5614	4306	5842	6662	5854	4920	8282	8424	8946	9040	8852	10836	10248	9322	9382	10356	11570	9138	276660	6156	784.727	7966.22	697.46	6483.67	1132.92	5533	819.881	9063.33	918.755	10002.7	920.625
2.4.1.11	4978	3816	3544	7100	5804	7246	7422	8538	7292	7476	8022	7590	9160	7076	5468	7044	7360	5722	4976	4546	6132	7258	3902	3300	10876	9852	10556	11560	10648	13452	9602	8542	8774	10078	11290	8778	274780	4112.67	761.641	7387.78	741.244	6971.67	1325.02	5019	1461.51	11157.3	1251.54	9510.67	1050.15
1.1.1.40	10308	7174	7780	7158	6540	7818	7524	8748	7314	7986	8500	7594	11552	8830	7336	8426	8898	7038	4466	3862	4674	6122	6336	5764	8118	7732	7802	8528	7692	10162	7492	6946	7306	8044	9414	7162	274146	8420.67	1662.33	7686.89	676.669	8680	1605.33	5204	1006.41	8339	946.923	7727.33	906.434
2.4.2.1	7236	5600	5576	6706	5554	7394	7360	8166	7734	7528	7954	7602	8844	6996	5878	7040	7710	5942	5436	5044	6048	6930	4794	3714	9594	8880	9232	11152	9824	13810	8536	7798	7794	9172	10750	8394	273722	6137.33	951.549	7333.11	783.672	7068.33	1118.6	5327.67	1101.57	10415.3	1835.66	8740.67	1110.89
1.2.1.12	8292	5908	6628	6438	6054	7082	7030	7976	7488	7102	7818	7562	9652	7492	6508	8190	8996	7324	6124	4904	5830	7188	5008	4596	8460	7678	7978	10054	9012	11414	8444	7882	7702	8730	10346	7784	272674	6942.67	1222.75	7172.22	626.252	8027	1157.06	5608.33	968.679	9099.33	1411.6	8481.33	999.304
3.2.2.27	6500	5014	5100	7484	6490	7430	7652	8828	7542	7804	8122	7534	9328	7208	5990	7068	6754	5900	5294	4508	5576	7060	5136	4222	9636	9136	9214	9462	9626	11572	8940	8286	8112	9476	10658	8648	272310	5538	834.225	7654	620.556	7041.33	1244.82	5299.33	999.005	9774.33	904.626	9020	937.975
3.4.11.10	8978	6148	7364	6226	5482	7130	7160	7540	7186	6816	7498	6606	10546	8308	6632	8476	9606	6540	5458	5060	5946	5818	4502	3714	9574	9036	8540	11780	10096	12542	7686	7270	7162	7786	8126	7382	271720	7496.67	1419.66	6849.33	661.9	8351.33	1590.3	5083	852.979	10261.3	1579.37	7568.67	363.606
1.8.5.4	6736	5210	5348	7514	6748	8260	8110	9246	8038	8534	8610	8816	8840	6762	5512	7148	6820	6018	4776	4464	5264	7156	4930	3818	9056	8982	9586	7508	8758	10226	9388	8468	8400	9676	10434	8550	271710	5764.67	844.024	8208.44	739.039	6850	1143.68	5068	1134	9019.33	909.1	9152.67	820.921
2.4.2.14	7496	5792	6148	7078	6228	7046	6682	7818	6742	7496	7790	7612	9418	6986	5828	7408	8528	6616	6140	5254	6030	6996	5894	4818	8652	8438	8680	8890	9202	10974	8924	8024	8260	9130	10234	8346	271598	6478.67	898.838	7165.78	552.077	7464	1309.77	5855.33	755.225	9139.33	935.141	8819.67	809.716
2.8.4.3	6938	5430	5494	7010	5864	7444	7402	8060	7202	7466	7708	7496	8894	6992	6032	7388	7740	6416	5740	5238	6072	7078	5260	4778	9296	8622	8864	9864	9244	11742	8622	8204	8360	9222	10046	8366	271594	5954	852.77	7294.67	612.038	7243.67	1020.52	5694.33	811.887	9605.33	1129.16	8803.33	707.02
5.1.2.3	7080	5618	5842	6440	5154	6200	5972	7392	5734	6332	6706	6180	9254	6658	5894	7444	6922	5984	5872	5108	6750	8288	6262	5412	8414	7780	8136	7226	8682	9878	11010	10038	10600	11196	13606	10454	271518	6180	787.429	6234.44	622.987	7026	1237.1	6282	1144.27	8352.67	903.674	11150.7	1270.99
1.8.5.5	6168	4980	5170	6968	6484	8208	8562	8798	9090	9082	9812	8518	10746	8344	7082	7898	6762	7282	6408	5248	6640	5520	5174	4722	9378	9028	9622	10558	9708	12918	6124	5908	5558	6226	6618	6010	271322	5439.33	638.155	8391.33	1054.24	8019	1453.13	5618.67	750.338	10202	1424.15	6074	351.98
2.1.1.222	6260	4756	4696	6432	5640	6844	7228	7484	6644	7124	7666	6786	9860	7354	6352	7182	6678	5626	5496	4824	5930	6528	4978	4178	11594	10738	10890	11048	10222	14378	8428	7604	7548	8824	9286	8004	271110	5237.33	886.163	6872	608.975	7175.33	1453.62	5322.33	840.173	11478.3	1488.57	8282.33	692.65
3.1.6.12	4882	4828	3858	6844	5714	7106	7304	8374	7186	7364	7528	7004	11368	8498	6902	7278	7552	5352	5412	5140	6682	6562	4296	3402	9604	9342	9910	8250	9940	11190	9452	8538	8772	9546	10004	8952	269936	4522.67	576.251	7158.22	697.338	7825	2017.28	5249	1275.58	9706	955.14	9210.67	549.888
2.1.2.10	7242	5924	5604	7676	6336	7488	7564	8156	7058	8056	8288	7494	9624	6968	5932	6592	6818	5676	5464	4520	5980	7142	6318	5808	9436	8472	9132	9720	9750	11256	8142	7454	7318	8268	8818	7804	269298	6256.67	868.194	7568.44	602.471	6935	1410.97	5872	874.293	9627.67	926.601	7967.33	557.919
7.3.2.1	6736	5566	5478	7304	6680	7948	7562	8424	7474	7898	8300	7938	10068	7334	6208	6808	6638	6228	5636	4948	5974	6134	5182	4654	8914	8302	8454	8510	8330	11272	8572	8004	8176	8992	9308	8268	268222	5926.67	702.283	7725.33	536.55	7214	1458.8	5421.33	588.14	8963.67	1152.02	8553.33	507.516
1.6.5.2	5126	4050	4020	6150	5796	7166	7352	7656	7478	6802	7398	6862	8452	6440	5438	6604	6160	6080	5574	4958	6336	8276	4656	4130	9610	9436	9702	8592	9164	11272	10028	9140	9396	11040	12368	9418	268126	4398.67	630.068	6962.22	631.091	6529	1023.67	5655	1493.28	9629.33	898.218	10231.7	1249.87
6.3.2.10	6302	5028	5186	6410	5732	7356	7378	7710	7492	7312	7766	7450	8520	6774	5980	6788	8388	6056	5576	5040	5766	6756	4940	4026	9700	8828	9394	11256	10252	12934	8614	7880	7726	8490	9266	7876	267948	5505.33	694.442	7178.44	668.181	7084.33	1115.51	5350.67	918.492	10394	1493.24	8308.67	592.124
5.4.2.12	5392	4694	4260	6412	5534	7146	7190	7268	7648	7310	8164	7284	8650	7354	6098	7662	8578	6650	6338	5422	6250	6140	4994	4300	11532	10792	10906	13040	10680	14794	6694	6098	6080	6678	7362	6466	267860	4782	571.108	7106.22	747.843	7498.67	1021.79	5574	817.754	11957.3	1642.84	6563	474.913
6.6.1.1	3670	3156	3178	5494	4718	5858	5902	6586	5888	6040	6794	5982	8030	5840	4968	6652	6030	5122	9494	8388	9026	13174	8658	7368	10110	9466	9654	9014	12116	12312	8590	7346	7492	8906	9302	7490	267814	3334.67	290.615	5918	597.611	6107	1126.03	9351.33	2004.06	10445.3	1415.77	8187.67	848.376
2.5.1.145	7418	5796	5602	7092	6014	7612	7538	8248	7732	7272	8016	7578	9558	7522	6030	7388	7340	5984	5572	4562	5772	6430	4596	3752	9730	9064	9118	10556	9578	12878	7524	7026	6864	7978	7872	6834	265446	6272	997.194	7455.78	643.108	7303.67	1303.98	5114	980.067	10154	1439.08	7349.67	510.798
2.2.1.7	6160	5244	5274	6360	5610	6478	6554	7358	6342	6482	7052	6658	9300	6484	5556	6828	7246	5556	6024	5120	6012	7202	5776	4378	8882	8890	8942	9068	9500	10720	9866	8706	9314	10222	11210	8952	265326	5559.33	520.409	6543.78	485.923	6828.33	1388.51	5752	952.046	9333.67	717.553	9711.67	924.755
2.3.1.304	6964	5058	5264	8448	6894	8142	8472	10104	7418	7648	8550	8146	9558	6346	5296	6146	5864	4892	5296	4530	6114	6184	6518	5954	8700	7654	8440	6834	7584	9172	8496	7844	8156	8800	9870	7768	263124	5762	1046.05	8202.44	902.171	6350.33	1661.67	5766	727.361	8064	858.48	8489	781.113
3.4.11.5	7706	5408	5708	6720	5744	7156	7182	7736	7454	7512	7902	7574	10904	7800	6246	7674	7356	6326	4556	3986	5340	5954	4292	3554	8422	7786	8136	8590	8488	10754	9190	8108	8278	9180	9852	8368	262942	6274	1249.19	7220	654.869	7717.67	1696.75	4613.67	888.561	8696	1049.44	8829.33	683.522
3.4.24.40	6354	4820	4726	6516	5768	6432	6840	8374	6804	7960	7840	7262	11156	7814	6324	8530	8346	6132	5386	4468	4606	10080	4778	4256	7260	6458	6732	6306	6882	7940	9966	9158	9130	10566	10990	9124	262084	5300	914	7088.44	840.538	8050.33	1826.4	5595.67	2230.14	6929.67	597.104	9822.33	817.98
1.3.99.41	8466	5786	6148	6790	5748	6892	7206	7748	6808	6758	6630	7196	9856	7104	6320	6876	6702	6212	6030	4518	5682	7166	5902	5126	6832	6570	6948	7468	7656	8988	9484	8360	8824	10178	11836	9172	261986	6800	1454.11	6864	539.617	7178.33	1353.83	5737.33	896.373	7410.33	872.593	9642.33	1237.69
6.3.2.13	6102	4952	4988	6484	5812	6944	6868	7970	7090	7230	7422	6810	7850	6586	5730	6640	7298	5802	5540	4864	6070	6886	4982	4098	9712	9154	9074	10224	9734	12392	7966	7762	7680	8494	9900	7904	261014	5347.33	653.808	6958.89	601.979	6651	828.203	5406.67	983.225	10048.3	1223.5	8284.33	841.235
6.1.1.11	6824	5442	5724	7034	6150	7392	7520	8218	7020	7478	8218	7358	8524	6342	5652	6934	6898	6148	5654	4710	5566	6988	5030	4534	8184	7982	8182	9220	8650	10690	8438	7570	7774	8794	9872	8116	260830	5996.67	730.234	7376.44	632.102	6749.67	993.711	5413.67	891.701	8818	1019.76	8427.33	834.316
3.4.21.89	6952	4906	5274	6440	5572	6742	6522	7668	6432	7314	7530	7036	9052	6754	5396	7718	7364	6036	5038	4292	5432	6516	4996	3932	8544	8046	8526	10120	9242	12096	8928	8108	8432	9060	10010	8562	260588	5710.67	1090.66	6806.22	657.602	7053.33	1296.48	5034.33	907.872	9429	1492.43	8850	663.93
4.3.2.1	6784	5610	5560	6988	5998	7278	6850	7888	6942	7458	7554	7300	8874	6648	5638	6800	6712	5710	5950	4880	5858	7022	5530	4886	8746	8592	8754	8058	8800	10920	8514	7852	7736	8810	9224	7692	260416	5984.67	692.694	7139.56	539.356	6730.33	1169.75	5687.67	799.766	8978.33	990.196	8304.67	640.001
1.1.1.335	5480	4566	4284	6900	5662	7340	7352	8466	7868	7744	7822	7826	10104	7556	6128	7046	7412	5990	4946	4726	6072	5790	3870	3034	10266	9666	9876	11722	10378	14126	6922	6264	6104	6920	7238	6914	260380	4776.67	625.211	7442.22	797.949	7372.67	1487.48	4739.67	1147.75	11005.7	1688.88	6727	441.33
3.6.5.4	6552	5254	5508	6912	6016	7598	6878	8000	6750	7542	8106	7472	8230	6678	5740	6956	7154	6076	5728	4620	5702	7018	5490	5060	8072	7276	7414	8216	8352	10558	8864	8416	8218	9402	10268	8166	260262	5771.33	687.902	7252.67	668.6	6805.67	878.296	5603	812.596	8314.67	1182.59	8889	820.016
2.7.6.1	7244	5448	5350	7298	6452	7386	7574	8500	6934	7518	8160	7652	9748	7510	6324	7436	7510	6428	5412	4480	5204	6132	5388	4538	7942	7234	7742	8306	8386	10184	8128	7514	7474	8276	8996	7584	259392	6014	1066.34	7497.11	605.897	7492.67	1232.04	5192.33	617.288	8299	1013.19	7995.33	595.042
3.6.1.11	5610	4460	4484	7694	6250	7404	7508	8808	6698	8052	8208	7748	8312	6006	5340	6302	6264	5826	5418	4798	6006	7328	5194	4606	8798	8126	8456	7882	8698	10538	8826	7838	8264	9114	10236	8284	259384	4851.33	657.134	7596.67	770.297	6341.67	1026.81	5558.33	996.956	8749.67	941.402	8760.33	852.165
2.3.1.16	7074	5480	5728	7886	7322	8212	8580	9392	7738	8974	9404	8378	9046	7434	5822	6146	5360	6324	5030	4392	5690	6310	4960	4330	7468	7412	7576	7970	8192	9906	7508	6886	7362	7916	8868	7304	259380	6094	857.716	8431.78	728.459	6688.67	1345.84	5118.67	765.346	8087.33	941.635	7640.67	687.063
3.6.1.40	5610	4460	4484	7694	6250	7404	7508	8808	6698	8052	8208	7748	8308	6004	5338	6298	6254	5826	5418	4798	6006	7328	5194	4606	8798	8126	8456	7878	8698	10530	8826	7838	8264	9114	10236	8284	259350	4851.33	657.134	7596.67	770.297	6338	1025.99	5558.33	996.956	8747.67	939.103	8760.33	852.165
5.4.99.13	8370	6324	6560	4602	4132	4812	4996	4718	5100	4646	4750	4700	8556	6202	5950	6484	7284	4982	6424	5668	6840	8208	6646	6146	8908	8552	8450	8084	9430	11204	10812	9824	9920	10506	10770	9616	259176	7084.67	1119.37	4717.33	272.815	6576.33	1224.97	6655.33	864.028	9104.67	1124.95	10241.3	518.394
3.5.2.6	7664	4854	5524	5646	4832	6038	6038	6894	5938	5776	6266	5780	9956	8136	6762	7842	7938	5546	4848	4300	5040	6440	4182	3494	9642	9392	9310	9654	9608	12060	8664	8382	8228	8566	9034	8488	256762	6014	1467.69	5912	547.168	7696.67	1474.85	4717.33	1004.6	9944.33	1046.17	8560.33	276.629
2.3.1.266	5784	4522	4764	6678	5836	7408	7614	8298	7760	7750	8364	7552	9274	7362	5968	6930	6366	5978	5534	4884	5986	6340	4434	3448	9220	8544	8788	8300	8376	11098	7982	7196	7260	8052	8578	7412	255640	5023.33	669.777	7473.33	788.649	6979.67	1250.28	5104.33	1070.53	9054.33	1054.95	7746.67	546.224
5.1.99.6	5748	4374	4672	6222	5246	6560	6650	7194	6478	6828	7490	6848	8156	6778	5212	6758	7094	5728	5728	4722	5930	6498	4542	3864	9250	8482	9044	9804	9356	11734	8668	7820	8324	9180	10286	8158	255426	4931.33	722.779	6612.89	637.585	6621	1039.82	5214	994.148	9611.67	1125.69	8739.33	888.491
3.1.1.17	5366	3776	4258	10872	8754	10160	9962	12596	8774	11188	11502	10500	8940	6634	4786	5626	5204	4988	4020	3628	4370	5880	4358	4134	8254	7822	8286	8442	9164	10756	5562	5010	4946	5308	5978	5328	255132	4466.67	815.28	10478.7	1246.87	6029.67	1569.18	4398.33	775.137	8787.33	1058.72	5355.33	379.532
1.1.3.6	5074	4012	3696	6212	5434	6604	6314	7106	6270	5750	6080	6318	8540	6510	5572	6702	6374	5960	4548	4074	5696	6146	3666	2886	8820	8464	8982	8434	8450	10562	10840	10004	10006	11142	12370	9804	253422	4260.67	721.871	6232	475.717	6609.67	1029.47	4502.67	1234.83	8952	820.841	10694.3	976.989
3.4.13.19	7904	5974	7634	6338	5418	6512	6820	7424	6596	6878	7072	6366	8446	7564	5984	6512	5968	5308	5660	4702	5914	5792	4998	4320	7982	7116	7264	8466	7984	10182	8850	8368	8110	9228	8408	8534	252596	7170.67	1045.1	6602.67	565.206	6630.33	1165.11	5231	652.58	8165.67	1107.91	8583	397.566
7.4.2.1	6544	5164	5036	7096	6388	7668	7306	7908	7150	7192	7268	7330	9638	6946	5762	6848	6142	6272	5146	4396	4980	6414	5502	4752	7560	7048	7852	7612	7806	10340	8126	7210	7576	8846	10128	7588	252540	5581.33	836.147	7256.22	417.93	6934.67	1397.01	5198.33	701.914	8036.33	1164.27	8245.67	1083.65
3.1.3.18	6452	5524	5348	6292	5526	6906	6772	7744	7164	6592	7324	6998	7778	6276	5346	5968	6210	5246	5480	4664	5570	6686	5168	4232	9268	8634	8636	10038	8590	11820	8102	6988	7252	7968	10134	7690	252386	5774.67	593.152	6813.11	639.559	6137.33	912.76	5300	847.212	9497.67	1268.87	8022.33	1117.33
6.3.4.5	6682	5328	5478	6758	6058	7030	6872	7488	6514	6860	7114	7012	8854	6804	6140	7068	7258	6124	5074	4494	5412	6960	5498	4788	7936	7612	7998	7450	8190	9888	8616	7804	7388	8440	9456	7510	251956	5829.33	742.23	6856.22	400.663	7041.33	1004.36	5371	864.865	8179	879.266	8202.33	787.454
3.5.4.25	6858	5494	5328	6734	6044	7078	7118	8176	6306	7164	7502	7108	8416	6426	5742	6140	6352	5790	5570	4652	5582	7034	5338	4742	7902	7328	7566	8420	8074	10184	8044	7550	7596	8546	9450	7804	251158	5893.33	839.539	7025.56	627.893	6477.67	990.324	5486.33	858.321	8245.67	1023.64	8165	727.095
6.1.1.21	6444	5038	5206	6650	5652	7096	6774	7916	6624	7182	7388	7014	8154	6118	5458	6854	6960	6092	5028	4576	5586	6576	4976	4126	7992	7866	8050	8786	8486	10992	8312	7490	7536	8366	9108	7712	250184	5562.67	767.865	6921.78	623.41	6606	938.442	5144.67	854.004	8695.33	1176.92	8087.33	627.94
3.1.6.1	4622	3734	3734	8404	7026	8154	8414	9536	7992	8596	8924	7948	8870	7376	5940	6624	5538	5512	4786	4256	6170	5032	4730	3688	9546	8272	8450	11640	9924	14098	5558	5048	5068	5398	5624	5642	249874	4030	512.687	8332.67	696.604	6643.33	1303.19	4777	832.481	10321.7	2211.91	5389.67	270.996
3.1.3.6	6678	5110	5008	5948	5554	6122	6450	7550	7094	6968	7390	6900	9934	8022	6538	8358	9286	6592	4792	4414	4656	6332	4122	3442	8894	7814	8400	11314	8418	12304	6596	5864	5884	6530	8192	6272	249742	5598.67	936.12	6664	682.77	8121.67	1382.31	4626.33	963.297	9524	1829.76	6556.33	859.055
1.1.1.169	5796	4570	4532	8678	7748	9412	9584	10442	8608	9586	10312	9078	8190	6402	4948	5498	4712	5256	4988	4238	5252	4874	4382	3670	8180	7408	8124	8322	7466	10874	6582	5868	5810	6524	7118	5918	248950	4966	719.052	9272	852.935	5834.33	1293.38	4567.33	580.997	8395.67	1273.39	6303.33	523.718
1.1.1.14	5216	4254	3920	6914	5998	7902	8138	8362	8320	8018	8854	7992	8156	6828	4720	5350	4336	5554	6436	5586	6712	5782	3606	3244	9030	8812	9454	9580	8474	11576	6944	6384	6574	7236	7640	6826	248728	4463.33	672.881	7833.11	860.852	5824	1426.66	5227.67	1460.39	9487.67	1101.3	6934	454.644
3.5.2.7	8008	5370	5908	6334	5488	6708	7068	7668	6566	6868	7302	6748	9150	6970	5940	6556	6528	5240	4656	3846	5124	5468	5002	4318	9392	8816	8678	9762	9184	11714	7212	6484	6688	7344	7440	6918	248466	6428.67	1393.94	6750	618.85	6730.67	1328.85	4735.67	588.277	9591	1111.38	7014.33	381.044
2.7.1.180	6026	4950	4596	6154	5360	6804	6722	7528	7006	6928	7278	6944	8036	6564	4900	6380	7106	5354	4396	3704	4540	5816	4208	3494	9954	9708	10188	8922	9038	11306	8204	7422	7746	8720	8774	7640	248416	5190.67	744.759	6747.11	643.221	6390	1144.18	4359.67	819.393	9852.67	870.132	8084.33	573.519
7.5.2.6	7158	5270	5560	6948	5944	6898	7506	8750	7162	7598	8364	7360	8990	7600	5934	6600	7676	5768	5608	4634	5248	6598	5750	4234	8342	7712	7738	9692	8898	10782	5888	5504	5878	5970	6622	6074	248258	5996	1016.71	7392.22	824.332	7094.67	1227.8	5345.33	842.906	8860.67	1202.74	5989.33	364.972
1.1.1.157	7166	5024	5288	7452	6308	6958	7498	8400	7262	8184	8126	7590	8036	5934	4862	6310	6194	5892	4496	4034	4978	5350	4712	3718	7052	6902	7306	8400	7656	10136	8634	7814	7908	9146	10004	7500	248230	5826	1167.96	7530.89	656.013	6204.67	1033.32	4548	601.797	7908.67	1214.64	8501	950.615
1.1.1.22	5938	4514	4654	6670	5558	6926	7176	7776	7026	7302	7606	7146	8570	6372	5482	6766	6814	5882	5018	4286	5324	6288	4662	3814	8510	7756	7916	8746	8532	10894	8016	7394	7440	8446	9226	7592	248038	5035.33	784.86	7020.67	642.6	6647.67	1073.13	4898.67	864.091	8725.67	1129.77	8019	713.776
3.2.1.22	4536	5132	4026	4864	4466	6114	6158	6476	7322	6276	6910	7254	10374	7122	5922	7472	7374	6032	4336	3888	5460	4944	2870	2358	9782	9244	9380	11370	10296	13406	7682	7216	7216	8202	8752	7634	247866	4564.67	553.557	6204.44	984.663	7382.67	1611.33	3976	1193.13	10579.7	1584.47	7783.67	598.314
6.3.2.8	6418	4860	5098	6536	5888	6878	7340	7970	6798	7498	7990	7378	7776	5868	5454	6426	6658	5620	5314	4588	5474	6532	5076	4002	8118	7618	8164	8888	8506	10684	7772	7150	7096	8056	8834	7202	247528	5458.67	839.286	7141.78	685.028	6300.33	858.761	5164.33	857.88	8663	1076.83	7685	682.912
2.3.1.31	6060	5124	4760	6664	5628	6928	6862	7942	6762	6972	7438	7182	8246	5824	4824	5526	5700	5106	5260	4754	6084	7290	5698	5056	8442	8288	8696	7546	8758	9968	7932	7268	7498	8034	9092	7432	246644	5314.67	670.645	6930.89	627.124	5871	1222.5	5690.33	914.139	8616.33	792.115	7876	665.799
2.3.1.46	6060	5124	4760	6664	5628	6928	6862	7942	6762	6972	7438	7182	8246	5824	4824	5526	5700	5106	5260	4754	6084	7290	5698	5056	8442	8288	8696	7546	8758	9968	7932	7268	7498	8034	9092	7432	246644	5314.67	670.645	6930.89	627.124	5871	1222.5	5690.33	914.139	8616.33	792.115	7876	665.799
4.3.2.10	6282	5032	4990	6412	5494	6692	6322	7396	6408	6848	6876	6770	8492	6268	5152	6380	6712	5864	5494	4788	5704	5998	4674	4370	8144	7780	8036	8546	8282	10388	8222	7750	7636	8598	9676	7912	246388	5434.67	734.113	6579.78	521.741	6478	1122.49	5171.33	649.253	8529.33	945.458	8299	759.236
2.7.7.27	6488	4916	5262	6028	5352	6500	6706	7282	7304	6606	6996	6644	8862	6392	5374	6316	6436	5770	5198	4492	5198	6226	4558	3634	8844	8544	8824	8002	7934	9906	8236	7714	7456	8602	8646	7624	244872	5555.33	826.032	6602	614.961	6525	1218.66	4884.33	874.139	8675.67	719.068	8046.33	518.005
1.5.3.1	5672	4862	4678	8956	7440	8568	8224	9424	7398	8802	8762	8130	10500	7152	6152	6084	5486	5156	5384	4358	5332	5618	7078	7018	7352	6584	6612	6970	7172	9438	5922	4902	5448	5716	6722	5796	244868	5070.67	528.834	8411.56	680.704	6755	1957.74	5798	1060.32	7354.67	1064.62	5751	597.987
6.2.1.30	7066	5702	5488	7774	6694	7738	8070	9194	8050	9560	9992	8282	8866	6448	4984	6876	7388	6508	5564	4340	5366	4550	4498	3456	6132	5526	5838	9166	6648	9760	6368	5882	6038	6746	7416	6324	244298	6085.33	855.996	8372.67	1030.15	6845	1273.95	4629	761.61	7178.33	1817.61	6462.33	554.045
1.17.99.6	5954	4754	4882	5876	5168	6532	6772	7328	7300	6676	7522	6464	7794	6378	5358	6532	7488	5750	6788	5018	6228	5840	4726	3802	9354	8274	8680	10354	8662	12428	6456	6088	6044	6606	7094	6416	243386	5196.67	658.985	6626.44	749.754	6550	950.595	5400.33	1091.74	9625.33	1556.1	6450.67	383.703
1.1.99.1	6234	4170	4590	9204	7812	8918	8926	10652	7986	8752	8804	9140	8206	5876	5026	5726	4960	5294	4434	3708	5040	6228	5426	4750	6168	6042	6260	4922	6902	7070	7634	6708	7096	8090	9064	6892	242710	4998	1090.81	8910.44	811.619	5848	1212.19	4931	861.93	6227.33	762.639	7580.67	886.933
2.1.2.9	6040	4922	4740	6842	5948	7286	7406	8262	7206	7830	8302	7638	8316	6246	4974	6262	6126	5320	4982	4320	5090	6264	4630	3670	8248	7510	7912	8244	7828	10402	7408	6570	6592	7356	8196	6788	241676	5234	703.923	7413.33	730.319	6207.33	1163.28	4826	870.938	8357.33	1039.42	7151.67	629.588
2.7.1.4	4748	3666	3612	5672	5120	6442	6378	6830	6604	5844	6328	6188	7172	5788	4748	5564	5298	4956	5466	4840	6098	7086	4504	3982	10894	10198	10806	10616	10288	13330	7330	6618	6510	7302	8038	6576	241440	4008.67	640.85	6156.22	526.968	5587.67	864.726	5329.33	1134.14	11022	1163.83	7062.33	603.33
2.3.1.39	5212	4476	4022	5886	5202	6522	6286	6936	6598	6486	6858	6428	7652	6120	5192	5846	6232	4926	5132	4586	5424	6512	4474	3670	8940	8234	8362	9236	8882	11290	8234	7260	7548	8374	9572	7664	240274	4570	600.543	6355.78	530.816	5994.67	961.999	4966.33	968.867	9157.33	1110.19	8108.67	831.837
3.5.1.9	6156	4220	4760	7978	6946	8428	8552	9542	8436	8878	9034	8606	9508	7466	5314	6466	6078	5686	4544	4198	5254	5522	3808	3512	6760	6302	6528	6490	6088	7786	6668	6120	6028	7150	8352	6878	240042	5045.33	999.042	8488.89	726.577	6753	1539.19	4473	794.578	6659	596.581	6866	846.99
3.5.4.16	7174	5232	5664	5550	5098	5888	6294	6702	6274	6018	6832	6344	8942	6404	5276	6948	8060	5940	4716	3828	4544	5568	4182	3412	7750	7422	7466	8250	7972	10344	8426	7622	7718	8384	9668	8102	240014	6023.33	1019.65	6111.11	545.749	6928.33	1365.13	4375	752.585	8200.67	1095.24	8320	738.86
4.1.99.22	5832	4732	4666	6446	5478	6818	6868	7760	6760	7106	7764	6982	7956	5732	5144	6412	6478	5748	5194	4266	5312	5592	4460	3770	7746	7504	7736	8198	7756	10382	8060	7068	7210	8142	9152	7404	239634	5076.67	654.97	6886.89	688.228	6245	972.839	4765.67	706.998	8220.33	1082.74	7839.33	780.247
1.4.1.3	6792	4698	5368	8002	6766	8158	8274	8922	7904	8474	9106	8092	8460	7170	5624	6050	6106	5456	5132	4382	5118	5500	4864	4340	7980	7374	7684	6332	6816	8148	6132	5608	5466	5876	7026	6180	239380	5619.33	1069.39	8188.67	672.507	6477.67	1140.4	4889.33	456.921	7389	701.169	6048	555.495
6.3.5.1	5180	4520	4388	5554	5258	6024	6092	6814	6278	6310	7168	6460	7712	5988	5290	5830	6390	5116	4880	4336	5630	6314	4538	3828	8512	7880	8254	9384	9262	10944	8076	7452	7568	8206	9338	7424	238198	4696	424.321	6217.56	585.699	6054.33	935.941	4921	908.666	9039.33	1098.64	8010.67	728.9
3.5.4.4	5810	4682	4516	6194	5324	7036	6984	7622	7070	7304	7664	7462	7506	6064	5120	6132	5310	5792	4620	4216	5354	6122	4120	3200	7176	6604	7210	8262	7696	10282	8000	7296	7432	8492	9618	7564	236856	5002.67	704.08	6962.22	757.121	5987.33	846.446	4605.33	1022.07	7871.67	1305.5	8067	876.515
5.3.1.8	6520	4840	5202	5620	4756	5892	6174	6738	6330	6302	6516	6188	7850	5756	4736	6488	6838	5076	5134	4286	5384	6852	4166	3322	8478	8230	8590	8608	8426	10000	8124	7262	7402	8250	9060	7286	236682	5520.67	884.173	6057.33	586.37	6124	1164.61	4857.33	1224.27	8722	640.768	7897.33	714.182
6.3.4.4	6210	4712	4768	6112	5288	6310	6172	7290	6434	6868	7248	6788	8326	6168	5274	6516	6720	5976	5066	4194	4882	5752	4500	3892	7288	6988	7362	8038	7836	9632	7824	7228	7172	8246	9528	7470	236078	5230	849.167	6501.11	629.433	6496.67	1026.72	4714.33	666.551	7857.33	949.502	7911.33	887.871
2.8.1.11	6112	4672	4838	5878	5248	6622	6474	6950	6772	6906	7278	6664	9114	6864	5604	6310	6134	5254	4770	4222	5018	5774	3916	3070	8984	8268	8636	8012	7664	10506	7470	6736	6772	7308	7960	6918	235698	5207.33	787.849	6532.44	615.83	6546.67	1376.79	4461.67	940.077	8678.33	1007.65	7194	477.483
2.7.7.19	5652	4410	4694	5418	5130	6198	5942	6500	6330	5834	6104	6034	7464	5798	5428	5808	6448	4962	5176	4654	5610	6354	4274	3440	8372	7834	8290	8314	8744	10610	8534	7532	7588	8748	9848	7610	235686	4918.67	650.767	5943.33	434.126	5984.67	874.63	4918	1027.27	8694	982.289	8310	919.134
4.2.1.136	5176	4012	4204	5768	4744	5892	6018	6480	5726	6162	6622	6148	7332	5938	4766	6256	6702	5278	5282	4174	5292	5772	4258	3594	8556	7766	8380	9404	8764	11060	8192	7314	7884	8702	9816	7736	235170	4464	624.038	5951.11	543.409	6045.33	934.678	4728.67	840.085	8988.33	1145.95	8274	886.658
6.3.4.13	6158	4712	4816	5848	5148	6086	6260	7110	5966	6908	6968	6348	7720	5754	4790	6140	6588	5260	5244	4204	5096	6476	4926	4290	7878	7902	7848	8724	8576	10538	7576	6844	7014	7982	8540	6852	235090	5228.67	806.504	6293.56	628.916	6042	1037.82	5039.33	822.343	8577.67	1033.71	7468	692.819
2.1.1.297	5970	4560	4648	6094	5326	6390	6434	7130	6620	6892	7012	7050	8018	6086	5084	6578	6502	5844	4456	3914	4740	5776	3636	2966	7702	6918	7126	8336	7146	9808	8222	7322	7472	8702	10620	7718	234818	5059.33	789.887	6549.78	577.373	6352	978.343	4248	974.652	7839.33	1093.58	8342.67	1226.37
2.1.1.192	5956	4612	4914	6478	5322	6712	6700	7356	6250	6996	7010	6724	8332	6534	5520	6246	6504	5748	4490	3918	4966	5728	4326	3406	7720	7518	7698	8472	7744	10516	7344	6500	6872	7670	8876	7116	234794	5160.67	705.136	6616.44	581.228	6480.67	994.542	4472.33	810.738	8278	1145.15	7396.33	827.523
2.5.1.19	5988	4740	4958	5654	5098	6364	6276	6826	6270	6406	6788	6716	7752	5818	5064	6358	6936	5264	4760	4226	4966	6392	4442	3774	8328	7946	8118	8778	8272	10502	7526	6738	7140	7798	8520	7068	234570	5228.67	666.574	6266.44	565.317	6198.67	1028.38	4760	901.591	8657.33	945.64	7465	635.515
2.7.4.33	5904	4312	4732	5632	4832	5986	6310	7086	5832	6378	6442	6480	6994	5216	4352	5164	5274	4356	4574	4244	5414	5934	4292	3594	8254	7780	8482	6910	7890	9888	9324	8540	8572	9838	11024	8560	234396	4982.67	825.071	6108.67	638.938	5226	964.66	4675.33	853.512	8200.67	986.75	9309.67	991.647
2.4.1.250	4382	3278	3356	5758	4936	6548	6412	6942	6906	6440	7018	6438	8072	6620	4950	5796	5278	5340	5030	4604	5452	6530	3306	2798	9214	8728	8626	8586	8322	11004	8148	7200	7124	8514	8766	7642	234064	3672	616.114	6377.56	662.169	6009.33	1164.31	4620	1382.39	9080	986.747	7899	685.155
2.5.1.1	4446	4214	3850	5714	4810	6376	6358	6944	6134	6200	6540	6384	7342	5820	4576	6430	6246	5100	4972	4360	5406	6452	4704	3902	8626	8214	8668	8996	9036	11400	7346	6786	6924	8036	8970	7108	233390	4170	300.426	6162.22	604.022	5919	987.643	4966	891.045	9156.67	1138.59	7528.33	832.146
2.5.1.10	4446	4214	3850	5706	4804	6366	6358	6944	6130	6196	6538	6384	7342	5820	4576	6430	6246	5100	4972	4360	5406	6452	4704	3902	8626	8214	8668	8996	9036	11400	7346	6786	6924	8036	8970	7108	233356	4170	300.426	6158.44	605.845	5919	987.643	4966	891.045	9156.67	1138.59	7528.33	832.146
2.6.1.19	7040	5500	5648	5906	5206	6660	6880	7068	6926	6928	7660	7072	9692	7166	6214	6742	5698	5892	4596	3574	4634	4892	4278	3474	6838	6502	6704	7284	7178	8990	7228	6560	6906	7428	8534	7036	232534	6062.67	849.624	6700.67	724.132	6900.67	1471.22	4241.33	589.715	7249.33	901.255	7282	680.428
4.2.1.1	5192	4350	4468	6820	5696	6676	7048	8272	6438	7156	7758	7168	8734	6390	5488	7226	7802	5692	4122	3652	4224	5998	3834	3426	7842	7328	7636	6434	7516	8792	7050	6564	6602	7314	8844	6850	232402	4670	455.899	7003.56	741.699	6888.67	1264.58	4209.33	924.368	7591.33	764.313	7204	851.203
1.1.1.85	5584	4626	4486	7010	6000	7038	6968	8308	6656	7666	8208	7542	7844	5656	5158	5542	4972	5238	4934	4478	5218	6130	5244	4494	7280	6952	7260	6770	7194	8898	7234	6542	6738	7356	8186	6708	232118	4898.67	597.63	7266.22	740.817	5735	1063.34	5083	612.454	7392.33	763.897	7127.33	609.012
3.2.1.41	2870	2662	2112	3762	3684	4584	4636	4862	5472	3868	4380	4730	10530	7988	6488	6778	7630	5086	4982	4480	6174	7060	4186	3542	8654	8374	8052	7388	8544	9526	9636	9270	9166	10194	11188	9116	231654	2548	391.648	4442	586.124	7416.67	1831.23	5070.67	1315.37	8423	706.524	9761.67	806.297
2.7.7.72	5570	4920	4660	5978	5294	6350	6718	6950	6806	6562	7782	6470	7550	6546	5692	6744	7502	5580	5442	4668	5486	4926	4284	3988	8596	7970	8096	10564	7988	11904	5596	5320	5348	5620	6270	5596	231336	5050	468.722	6545.56	682.154	6602.33	849.069	4799	606.903	9186.33	1657.5	5625	342.779
3.2.2.23	5478	4228	4062	6216	5432	6616	6134	7142	6118	6630	6680	6302	7952	5782	5036	5286	4574	4790	4530	4194	5242	5816	4360	3672	8020	7650	7928	7370	8048	9822	8386	7428	7642	9156	9828	7746	231296	4589.33	774.071	6363.33	480.518	5570	1239.77	4635.67	770.935	8139.67	863.705	8364.33	953.976
6.3.2.12	5450	4554	4512	6056	5152	6504	6230	6878	6146	6464	6620	6550	7656	5884	4778	5854	6448	5058	5058	4066	5350	6182	4432	3700	7762	7432	7514	8626	7900	10316	7300	6762	6616	7684	8318	6818	228630	4838.67	529.847	6288.89	496.543	5946.33	1033.55	4798	912.485	8258.33	1093.69	7249.67	656.994
1.8.4.11	5580	4284	4580	6580	5498	6646	6704	7482	6926	7028	7586	6886	6828	5258	4128	5272	5754	4652	5078	4242	5024	6044	4526	3806	8438	7698	8322	8442	8262	11108	6706	5916	6134	6944	7666	6434	228462	4814.67	679.121	6815.11	605.46	5315.33	931.185	4786.67	780.821	8711.67	1205.95	6633.33	627.986
6.3.2.17	5450	4554	4512	6056	5148	6492	6222	6876	6136	6456	6606	6538	7654	5872	4778	5848	6448	5054	5052	4060	5348	6182	4426	3684	7760	7426	7504	8622	7896	10300	7298	6760	6616	7684	8316	6818	228452	4838.67	529.847	6281.11	494.932	5942.33	1033.84	4792	917.2	8251.33	1090.12	7248.67	656.61
2.6.1.51	5906	4600	4734	8068	6966	7986	8068	9336	7330	8580	9036	7868	8284	6184	5080	6296	5372	5474	4944	4200	5130	5764	5034	3944	7146	6618	7042	6486	6782	8252	5146	5104	4728	5696	5546	5472	228202	5080	718.468	8137.56	755.747	6115	1164.15	4836	663.121	7054.33	637.262	5282	356.171
3.1.11.6	4984	4060	3896	5818	5040	6254	6146	6968	6242	6118	6738	6052	7426	5924	4850	6068	6050	5270	4670	4220	5510	5234	4594	3542	8550	8170	8334	9056	8630	11072	7290	6752	6696	7264	7784	6628	227900	4313.33	586.574	6152.89	546.242	5931.33	880.169	4628.33	706.249	8968.67	1073.53	7069	454.354
3.4.11.6	7666	5430	6404	4996	4506	5832	5902	6266	5904	5616	6094	5410	8568	6796	5332	7000	7716	5290	4690	4288	5050	4936	3870	3176	8042	7650	7228	10120	8612	10812	6372	6118	6056	6590	7064	6252	227654	6500	1121.09	5614	561.391	6783.67	1299.11	4335	715.565	8744	1426.56	6408.67	373.388
6.3.2.9	5480	4386	4638	5566	4826	6098	6184	6874	6170	6490	6828	6480	7358	5786	4752	5986	6046	5056	4932	4252	5248	5984	4454	3548	8196	7482	7440	8772	7968	10346	7424	6730	6746	7582	8568	6792	227468	4834.67	572.903	6168.44	642.611	5830.67	913.112	4736.33	846.544	8367.33	1087.33	7307	720.043
3.1.11.2	5874	4394	4628	5272	4836	6006	5906	6486	5786	5612	5976	5960	7732	5566	5024	5778	6214	4532	4730	3922	4852	6616	4704	3682	7772	7246	7288	7232	7456	9548	8476	7666	7798	8612	9402	7894	226478	4965.33	795.579	5760	475.666	5807.67	1110.76	4751	1031.61	7757	900.579	8308	657.44
2.4.1.21	6476	5010	5310	5198	4378	5416	5838	6182	6350	5916	6562	6116	7722	6008	5120	5440	6606	4742	5482	4660	5050	6124	4652	3892	9112	8428	9088	9592	8228	11160	6322	6064	5940	6248	6202	5816	226450	5598.67	774.458	5772.89	677.233	5939.67	1093.74	4976.67	769.325	9268	1051.53	6098.67	194.491
3.5.1.98	5854	4000	4546	5634	5272	6244	6754	7602	6450	6884	7584	6468	8030	6452	5080	5978	6426	5058	5114	4474	4952	5434	4366	3574	8292	7406	7850	9298	7966	11102	5924	5810	5850	5962	6498	6110	226298	4800	952.741	6543.56	783.53	6170.67	1101.47	4652.33	661.896	8652.33	1357.63	6025.67	253.76
3.1.3.7	5450	4622	4290	5818	4936	5792	5898	6848	6166	6362	6776	6378	7854	5990	4876	5838	6782	5148	4788	4206	5156	5514	4210	3362	8038	7262	7680	9374	7950	10868	6916	6488	6246	7138	7858	6364	225242	4787.33	597.412	6108.22	584.834	6081.33	1097.7	4539.33	774.309	8528.67	1348.14	6835	605.652
4.1.1.44	4116	2820	3124	8784	7422	8850	9158	10066	8312	9270	9680	8808	5610	4144	3396	3598	2742	4326	3426	3302	3912	4058	3750	3122	10532	10074	10676	10914	9660	13280	3920	3678	3702	3986	4380	3516	224114	3353.33	677.753	8927.78	768.043	3969.33	982.085	3595	367.973	10856	1269.52	3863.67	305.359
2.4.99.16	3976	3212	3486	6784	5912	6710	7322	7810	6760	7426	7430	7522	6554	5342	4454	4754	5006	5112	4822	4234	4856	5616	4180	3126	7866	7740	7474	7524	7470	9778	7308	6898	6780	7776	8154	6876	224050	3558	387.056	7075.11	583.092	5203.67	728.589	4472.33	840.514	7975.33	897.479	7298.67	559.951
3.1.21.3	2934	3630	2480	3126	2606	3196	3230	3704	4068	2886	3178	3388	8062	5542	5596	8094	11334	5046	2966	2692	3302	3884	2164	1882	9840	9286	9022	8200	8160	9380	10796	9922	10248	11950	16574	11350	223718	3014.67	579.228	3264.67	427.706	7279	2389.82	2815	736.498	8981.33	674.654	11806.7	2447.83
2.7.7.2	5596	4228	4414	6104	5214	6278	6188	7402	6074	6578	7064	6440	6920	5412	4698	5676	6118	5202	4646	3894	4844	5778	4188	3390	8290	7350	7642	8850	7752	10608	6880	6066	6472	6816	7682	6252	223006	4746	741.973	6371.33	625.61	5671	773.771	4456.67	831.667	8415.33	1198.78	6694.67	577.001
2.4.1.255	6082	4352	4790	7460	6310	6674	6734	8318	5650	7184	7460	6452	8586	5880	4868	5236	5060	3642	6906	5030	6838	7178	7002	5802	6270	5938	5976	5466	7714	7050	6230	5834	6074	5390	5222	5912	222570	5074.67	899.445	6915.78	783.125	5545.33	1659.54	6459.33	851.933	6402.33	828.437	5777	393.112
6.1.1.18	5994	5320	4980	5924	5290	6436	6578	7196	6626	6496	7296	6598	7398	6078	5280	5744	6366	4978	4760	4300	4952	5368	4650	4050	7972	7690	7762	9342	8144	10588	5322	4976	5200	5262	6170	5474	222560	5431.33	516.087	6493.33	607.164	5974	862.416	4680	468.173	8583	1151.84	5400.67	410.677
3.1.3.48	4472	3374	3668	5510	4754	5836	5386	6062	5268	5426	5408	5780	7242	5726	4596	5336	5518	4382	4640	3910	5224	5754	3728	3012	8318	7934	8156	6986	7596	9912	8980	7996	8098	9204	10630	8500	222322	3838	568.398	5492.22	378.149	5466.67	1017.19	4378	1018.35	8150.33	984.009	8901.33	970.786
1.17.98.3	4806	3462	4158	4922	4520	6116	6534	6430	7576	5716	6008	5596	5274	5162	3844	4544	4130	4734	7716	6132	6510	4010	4024	2824	10398	9270	9694	14370	10024	16730	4438	4324	4062	4796	4694	4584	222132	4142	672.143	5935.33	903.194	4614.67	562.558	5202.67	1863.3	11747.7	3061.02	4483	267.297
1.1.5.2	5482	4216	4336	8828	7064	8156	8724	11090	6774	9326	9178	8416	10220	7320	5808	6454	5474	5382	3576	3786	4346	5430	4890	3916	5604	5376	5518	5096	6700	6924	4766	4128	4580	4538	5754	4788	221964	4678	698.865	8617.33	1277.23	6776.33	1835.01	4324	715.47	5869.67	753.338	4759	542.21
2.7.2.3	5468	4412	4588	5716	4892	5828	6108	6634	5856	6340	6616	6402	7836	6134	4992	6424	6674	5474	4682	3872	4798	5566	4168	3732	7340	6816	7026	8162	7618	9476	6834	6566	6546	7154	7856	6534	221140	4822.67	565.761	6043.56	549.073	6255.67	992.316	4469.67	685.156	7739.67	972.65	6915	520.055
6.1.1.2	5700	4524	4642	5778	4982	6114	6194	6770	6318	6510	6758	6472	7618	5950	4784	6262	6596	5440	4604	3942	4892	5630	4638	4020	6808	6402	6538	7446	6940	8450	7610	6718	6630	7524	7952	6782	220938	4955.33	647.593	6210.67	557.706	6108.33	976.332	4621	618.764	7097.33	755.789	7202.67	560.444
1.16.3.1	3826	3180	3168	7204	6266	7322	7286	8556	6864	7100	7336	7412	6824	5938	4686	5938	6176	5644	4342	3372	4484	4748	4100	3380	6786	6470	6452	6592	6342	8530	6892	6286	6598	7470	9750	6736	220056	3391.33	376.48	7260.67	600.687	5867.67	702.268	4071	577.8	6862	831.031	7288.67	1267.77
4.2.3.5	4928	3984	3892	5650	5018	5954	6234	6682	6086	6350	6714	6136	7964	6002	5196	6234	6038	5318	4472	4028	5050	5304	4158	3728	7516	6866	7374	7318	7380	9336	7296	6562	6302	7750	8346	6750	219916	4268	573.425	6091.56	523.398	6125.33	993.055	4456.67	612.236	7631.67	864.001	7167.67	779.064
6.2.1.44	6050	5022	4742	8820	7716	8194	8644	9532	7364	9394	8550	7908	8194	5980	4912	5328	4628	4834	4496	3588	4486	5496	6022	5698	4978	4976	5220	4012	5562	5602	5440	5054	5192	5858	6794	5382	219668	5271.33	688.724	8458	735.125	5646	1337.12	4964.33	925.422	5058.33	580.247	5620	636.789
3.1.1.5	5752	4468	4380	6294	5760	6854	7344	8562	6738	7464	7838	7444	6846	4930	4152	5160	5568	4648	4070	3446	4076	5428	4072	3290	7858	7512	7804	8348	7980	10158	5778	5244	5336	5820	7104	5730	219256	4866.67	767.983	7144.22	837.53	5217.33	929.564	4063.67	753.888	8276.67	960.825	5835.33	666.805
1.15.1.1	5446	4298	4566	5950	4964	6120	6210	6998	6110	6510	6918	6472	7978	5588	5272	5974	6280	4952	4608	3852	4572	6030	4386	3546	7648	7104	7314	8054	7394	9896	6472	5668	5876	6502	7682	6038	219248	4770	600.573	6250.22	602.547	6007.33	1076.04	4499	860.321	7901.67	1029.98	6373	720.581
2.5.1.7	5580	4534	4482	5742	4802	6160	6118	6658	6012	6690	6888	6374	7448	5696	4878	5962	6450	5418	4534	3606	4698	5212	4364	3556	7312	6968	7322	7694	7380	9468	6734	6426	6132	7366	8076	6454	219194	4865.33	619.465	6160.44	627.22	5975.33	892.975	4328.33	644.881	7690.67	900.776	6864.67	725.757
3.5.4.9	5552	4384	4748	5554	4768	6252	5934	6250	6240	6244	6890	6336	7970	6324	4968	6042	6454	5038	4878	4316	4750	5210	4282	3604	7148	6696	6964	8188	7144	9584	6718	6184	6150	7036	7818	6554	219172	4894.67	597.653	6052	596.332	6132.67	1102.6	4506.67	564.52	7620.67	1087.51	6743.33	623.209
2.1.3.2	6244	4774	4850	6026	4948	6132	6254	7138	6028	6716	6860	6534	8084	6060	5118	5822	5570	5444	4594	3668	4630	5292	4318	3816	6786	6586	6788	7684	7044	9162	6774	6386	6140	6956	7454	6360	219040	5289.33	827.638	6292.89	637.427	6016.33	1062.89	4386.33	594.758	7341.67	970.129	6678.33	482.599
1.6.5.9	3350	3004	2818	8072	6996	8016	7780	8982	7266	8232	8530	7978	7300	5494	4440	5118	4912	5266	3992	3662	4686	5504	4068	4034	5390	5148	5328	5710	5546	7168	7514	6636	6666	7782	9780	6838	219006	3057.33	269.98	7983.56	601.842	5421.67	987.243	4324.33	666.565	5715	737.113	7536	1195.88
1.3.99.29	4536	3932	3748	4140	3906	4864	4790	5294	5330	4730	5518	4758	8176	6268	5038	6320	7106	4978	4606	4264	5588	6212	3832	3152	8270	7936	7994	7384	8024	9670	8498	7464	7314	8728	9134	7490	218992	4072	412.233	4814.44	534.355	6314.33	1225.52	4609	1129.04	8213	771.2	8104.67	776.686
1.3.99.26	4536	3932	3748	4140	3906	4864	4790	5294	5330	4730	5518	4758	8176	6268	5038	6320	7106	4978	4606	4264	5588	6212	3832	3152	8270	7936	7994	7384	8024	9670	8498	7464	7314	8728	9134	7490	218992	4072	412.233	4814.44	534.355	6314.33	1225.52	4609	1129.04	8213	771.2	8104.67	776.686
1.3.99.28	4536	3932	3748	4140	3906	4864	4790	5294	5330	4730	5518	4758	8176	6268	5038	6320	7106	4978	4606	4264	5588	6212	3832	3152	8270	7936	7994	7384	8024	9670	8498	7464	7314	8728	9134	7490	218992	4072	412.233	4814.44	534.355	6314.33	1225.52	4609	1129.04	8213	771.2	8104.67	776.686
1.3.99.31	4536	3932	3748	4140	3906	4864	4790	5294	5330	4730	5518	4758	8176	6268	5038	6320	7106	4978	4606	4264	5588	6212	3832	3152	8270	7936	7994	7384	8024	9670	8498	7464	7314	8728	9134	7490	218992	4072	412.233	4814.44	534.355	6314.33	1225.52	4609	1129.04	8213	771.2	8104.67	776.686
2.1.1.107	4212	3980	3530	6262	5744	6862	6608	7662	6448	6832	7070	6844	6592	5024	4612	5150	4710	5018	4168	3366	4692	4834	4092	3412	6448	6280	6752	6772	6578	8202	8642	7430	7620	8794	10334	7402	218978	3907.33	346.758	6703.56	536.701	5184.33	719.533	4094	617.38	6838.67	693.298	8370.33	1139.66
2.8.1.13	5356	4078	4642	5324	4562	5312	5632	6108	6128	6086	6474	6134	7014	5214	4682	5294	5740	4734	5122	4220	4840	5332	4218	3654	8486	7722	8106	8882	8108	10156	6752	6246	6244	6896	8136	6594	218228	4692	640.465	5751.11	597.302	5446.33	861.699	4564.33	639.299	8576.67	868.029	6811.33	700.59
4.1.1.19	7150	5376	5624	5052	4482	5232	5344	6068	5228	5208	5788	5674	8166	6284	5716	6378	7192	5126	4126	3604	4066	5354	4806	4094	7242	6806	7016	7110	7164	8578	7532	6670	7028	7160	7624	6694	217762	6050	960.664	5341.78	461.38	6477	1078.45	4341.67	627.442	7319.33	634.617	7118	404.42
2.4.1.227	5542	4110	4328	5704	5072	6080	5922	7050	6206	6098	6560	6026	6994	5092	4568	5538	5924	4956	5178	4204	5444	5790	4816	3960	6972	7124	7224	8008	7400	9808	6926	6090	6216	6942	7582	6276	217730	4660	771.572	6079.78	544.612	5512	865.265	4898.67	712.795	7756	1067.52	6672	577.753
1.1.1.136	5748	4498	4526	5776	5154	5884	5852	6902	6056	6398	6682	6458	7968	6002	4994	6282	7074	5004	4368	3528	4728	4942	4114	3604	6914	6634	6754	7590	7010	9324	6512	6178	6336	6932	8082	6382	217190	4924	713.742	6129.11	536.337	6220.67	1167.73	4214	578.03	7371	1012.44	6737	706.68
2.1.1.21	3976	3084	3062	7300	5944	6982	6792	8270	5948	7264	6936	6766	6188	4866	4098	4298	3574	4528	5814	5124	6296	7172	7104	6506	6838	6492	6988	6780	7924	8968	5612	4828	5300	5906	7222	5734	216484	3374	521.463	6911.33	709.412	4592	893.665	6336	782.387	7331.67	938.044	5767	807.622
5.4.99.23	5290	4634	4502	5508	4642	5744	5986	6502	6264	6400	6542	6622	7378	5630	4808	5966	7344	5424	4492	3952	4440	5410	3644	3120	7096	6776	6878	8938	7862	10658	6334	5774	5858	6470	7288	6246	216422	4808.67	422.039	6023.33	643.176	6091.67	1053.14	4176.33	792.546	8034.67	1518.61	6328.33	543.386
2.7.1.25	4658	4106	3782	6608	5600	6578	6324	7670	6212	6506	6552	6790	8800	6096	5168	6628	6454	5070	3564	3304	4164	4896	3932	3352	6778	6328	6738	6110	7350	7888	7188	6388	6672	7410	7820	6722	216206	4182	442.918	6537.78	545.958	6369.33	1355.61	3868.67	604.196	6865.33	657.852	7033.33	534.526
4.1.99.13	4378	3506	3630	3684	3170	4094	4172	4552	4172	3644	3584	3670	6892	5494	4370	4802	4888	3574	6362	5636	6614	7952	5340	4496	9030	8370	8780	7852	9142	10730	8296	7670	7644	8352	9962	7686	216190	3838	471.746	3860.22	417.48	5003.33	1123.01	6066.67	1193.46	8984	977.306	8268.33	890.301
5.1.99.4	4732	3534	3480	6898	5788	6762	6456	7098	5784	6732	6894	6794	6738	5078	4346	4750	3602	4100	4628	3870	5374	6048	4020	3462	7170	7314	7436	5800	7636	8406	7684	6760	6898	7902	8840	7224	216038	3915.33	707.769	6578.44	480.404	4769	1091.9	4567	985.33	7293.67	851.056	7551.33	769.601
2.5.1.49	5754	4920	4466	5508	4934	5584	5386	6610	5776	6038	6454	5886	8598	5856	5068	5800	5508	4688	4396	3526	4916	5902	4526	4310	6724	6622	6950	5568	6946	7440	7578	6946	7100	7930	8496	6944	215654	5046.67	653.276	5797.33	524.6	5919.67	1385.9	4596	784.81	6708.33	625.825	7499	625.947
6.4.1.1	6726	5536	5434	5580	4992	6396	5714	6766	6780	6218	6596	6632	7864	5948	5070	6956	7218	6850	4472	3558	3912	3940	4386	3284	6596	6608	6844	6264	6740	8126	6360	5796	5936	6500	6712	6090	215400	5898.67	718.304	6186	624.203	6651	991.893	3925.33	459.933	6863	648.964	6232.33	351.136
6.3.4.3	7024	5514	5418	5348	4912	5682	5658	6192	5852	6122	6082	5838	7816	5842	5020	6046	5828	5042	4480	3880	4550	5270	4838	4488	6386	6036	6072	6924	6986	8238	7154	6298	6344	6898	7476	6568	214122	5985.33	900.792	5742.89	409.054	5932.33	1020.31	4584.33	458.675	6773.67	824.467	6789.67	470.11
1.5.1.5	5336	4210	4554	5622	4830	6326	5954	6360	6094	6164	6748	6292	7866	6206	4886	5974	6318	4942	4744	4142	4552	5120	4248	3564	6962	6470	6728	7648	6844	8936	6522	5924	5952	6780	7712	6314	213844	4700	577.023	6043.33	549.247	6032	1093.66	4395	538.192	7264.67	908.666	6534	664.465
1.1.1.86	5420	4598	4584	5800	5316	6154	6496	7158	6306	6402	6924	6750	7816	5670	4996	5790	5408	5242	4590	3712	4782	5522	4192	3998	5976	5636	5756	5514	6284	7150	7346	6678	6650	7398	8308	7038	213360	4867.33	478.675	6367.33	567.413	5820.33	1018.84	4466	646.991	6052.67	602.547	7236.33	613.432
4.2.3.4	5546	4008	4164	6160	5094	6364	6346	7116	6112	6498	6840	6648	7130	5428	4704	5244	5574	4698	4454	3690	4714	5800	3874	3360	7064	6756	6862	7212	6860	8452	6902	6118	6250	6758	7858	6242	212900	4572.67	846.533	6353.11	570.961	5463	894.617	4315.33	881.008	7201	634.526	6688	653.492
4.1.1.36	5470	4306	4192	5690	4902	5912	5606	6652	5796	6010	6334	5740	6954	5358	4470	5360	5818	4652	4418	3824	4758	5790	4204	3634	7220	7080	7094	7818	7408	9148	6988	6526	6286	7032	7586	6614	212650	4656	707.245	5849.11	488.077	5435.33	895.535	4438	775.741	7628	793.325	6838.67	463.004
2.6.1.44	5358	4228	4466	7204	6282	7232	7216	8500	6596	7568	8052	7148	7812	5800	4726	5702	4942	4874	4486	3846	4730	5312	4740	3732	7010	6542	6852	6500	6812	8280	4848	4798	4416	5350	5190	5050	212200	4684	595.708	7310.89	675.666	5642.67	1153.81	4474.33	597.265	6999.33	656.583	4942	330.418
5.1.1.1	5486	4152	4170	5106	4530	5544	5586	6042	5576	5702	5958	5680	6696	5230	4212	5850	6796	4880	4390	3772	4480	5460	3906	3192	7702	6998	7336	9392	8158	10532	6170	6034	5856	6520	7966	6092	211152	4602.67	765.042	5524.89	458.585	5610.67	1027.16	4200	773.018	8353	1353.49	6439.67	779.098
6.3.2.5	5432	4228	4172	5658	4890	5878	5580	6628	5754	5996	6336	5722	6878	5330	4418	5276	5692	4600	4406	3812	4742	5782	4184	3620	7150	7022	7036	7702	7300	9004	6958	6508	6260	7000	7544	6582	211080	4610.67	711.846	5826.89	489.354	5365.67	881.734	4424.33	777.711	7535.67	761.77	6808.67	456.604
3.1.3.11	5394	4160	4050	6564	5384	6598	6670	7436	6798	6880	7280	6778	8120	6430	5280	6004	5876	5182	4072	3704	4422	4564	3806	3262	7140	6658	6736	5512	5928	7482	6028	5518	5468	6536	7462	5534	210716	4534.67	746.234	6709.78	579.545	6148.67	1072.34	3971.67	483	6576	738.005	6091	788.46
1.2.1.11	5644	4464	4610	5782	5320	6060	5986	6800	5710	6270	6638	6182	7102	5342	4842	5874	5888	5334	4386	3552	4278	5290	4250	3774	6442	6004	6506	6392	6334	7782	6942	6440	6524	7174	8086	6510	210514	4906	643.282	6083.11	459.445	5730.33	777.687	4255	602.413	6576.67	615.937	6946	628.62
2.8.4.4	5042	4024	4050	4280	3930	4830	4694	5644	5030	5046	5430	4860	7850	6054	5106	6016	6740	5142	4102	3582	4626	5096	3744	2772	7608	7024	7384	8406	7768	9788	7586	6476	6896	7420	8160	6860	209066	4372	580.383	4860.44	528.3	6151.33	1036.46	3987	818.624	7996.33	990.073	7233	607.397
3.10.1.1	3470	3750	2932	5396	4362	5386	5382	7076	5294	5480	5884	5378	7990	6130	4814	5816	6196	4656	4814	4226	5966	6340	4130	3424	8192	7908	8562	9500	10244	11728	4786	4414	4504	4908	5000	4960	208998	3384	415.726	5515.33	708.838	5933.67	1202.98	4816.67	1131.5	9355.67	1450.36	4762	247.147
2.4.2.29	5340	4478	4326	5440	4702	5450	5668	6226	5486	5672	6250	5786	7272	5930	4582	5870	6490	4692	4584	3742	4644	5218	3954	3380	7026	6646	6714	7580	7338	9208	6484	5926	6004	6668	6918	6198	207892	4714.67	546.861	5631.11	463.353	5806	1036.89	4253.67	679.164	7418.67	946.785	6366.33	390.564
1.1.1.343	4612	3494	3606	5686	5038	6160	6082	6814	6202	6428	6952	6308	6734	5340	4620	4812	4360	4624	4162	3654	4592	5394	3398	2928	7522	7150	7430	7396	7104	9620	6760	6236	6084	6842	7614	6006	207764	3904	615.698	6185.56	573.829	5081.67	873.277	4021.33	888.653	7703.67	952.999	6590.33	610.473
1.1.1.44	4612	3494	3606	5686	5038	6160	6082	6814	6202	6428	6952	6308	6734	5340	4620	4812	4360	4624	4162	3654	4592	5394	3398	2928	7522	7150	7430	7396	7104	9620	6760	6236	6084	6842	7614	6006	207764	3904	615.698	6185.56	573.829	5081.67	873.277	4021.33	888.653	7703.67	952.999	6590.33	610.473
1.3.99.23	5046	3814	3890	4730	3908	4732	5096	5424	5070	4680	5028	4662	5476	4424	3986	4262	4702	3554	5512	4864	6372	7556	4724	4004	7870	7874	8122	7692	7878	9648	7302	6512	6428	7396	7746	6858	206842	4250	690.403	4814.44	424.062	4400.67	656.614	5505.33	1283.14	8180.67	731.774	7040.33	525.408
1.1.1.23	4802	3934	4048	5212	4676	5332	5500	6050	5304	5750	5866	5644	7036	5554	4802	5746	6086	5108	4316	3604	4648	5294	3968	3452	6700	6864	6944	7564	7262	8682	6884	6270	6392	7364	7828	6268	206754	4261.33	471.688	5481.56	410.059	5722	788.833	4213.67	689.698	7336	728.027	6834.33	648.884
4.1.1.32	4722	3882	3456	4728	4524	5266	5002	6044	5168	5572	5892	5624	6314	4650	3812	4526	4236	4512	4548	4052	5044	5690	4100	3192	7400	7034	7224	6418	7418	8476	8150	6960	7522	8612	9578	7338	206686	4020	644.183	5313.33	514.551	4675	857.112	4437.67	867.479	7328.33	671.795	8026.67	962.413
2.3.1.15	6136	4674	4764	3822	3236	4138	4414	4604	4402	4262	4384	3908	5436	4378	3850	3930	4694	3036	5642	4562	6010	7638	5230	4946	6658	6474	6546	6900	7856	8848	8406	7616	7962	8382	10768	7858	206370	5191.33	819.342	4130	419.032	4220.67	818.676	5671.33	1089.48	7213.67	946.961	8498.67	1153.22
3.5.1.1	6038	4470	4604	4028	3558	4370	4578	5006	4636	4312	4558	4398	8450	6246	5100	6998	7970	5034	4446	3780	4494	5484	3882	3132	7374	7094	7106	7632	7802	9728	6976	6050	6288	6746	7530	6214	206112	5037.33	869.189	4382.67	408.178	6633	1433.8	4203	801.711	7789.33	990.583	6634	560.267
2.8.3.19	4360	3122	3430	8484	7684	8534	9160	10430	7680	9670	9212	8808	6674	4430	3870	3862	2504	4362	4082	3628	4188	4800	4186	3302	6702	6830	6946	5472	6744	7742	4366	4016	4112	4270	4300	4140	206102	3637.33	644.516	8851.33	891.625	4283.67	1360.69	4031	517.008	6739.33	729.907	4200.67	132.403
3.4.11.18	4904	3902	3912	5028	4710	5282	5232	5708	5168	5174	5438	5430	6560	4978	4264	5342	5668	4656	4216	3590	4490	5426	3902	3326	6674	6358	6648	6964	6940	8644	7634	6896	7192	7996	9456	7208	204916	4239.33	575.64	5241.11	280.965	5244.67	812.174	4158.33	748.571	7038	817.473	7730.33	929.143
2.7.1.165	4532	3730	4022	5196	4540	5576	5960	6122	5636	5960	6222	5780	7232	5216	4516	5002	4940	4582	4524	3634	4412	4778	3616	2848	7504	7188	7192	8174	6928	9496	6536	5962	6208	6522	8068	6310	204664	4094.67	405.908	5665.78	524.49	5248	1007.18	3968.67	728.317	7747	958.295	6601	749.667
3.5.1.2	3562	2756	2742	6132	4740	5514	5938	6552	5118	5712	6004	5824	6122	4556	3794	4194	4034	3840	4632	4062	5140	5668	4224	3602	7220	7096	7418	6552	7438	8954	7654	6962	6918	7740	8404	6844	203662	3020	469.438	5726	543.823	4423.33	876.765	4554.67	754.684	7446.33	805.943	7420.33	619.509
2.6.1.11	5780	4594	4286	5194	4770	5544	5284	6084	5370	5640	5764	5678	6768	5030	4316	5834	6374	5070	4792	3950	4604	5718	3932	3216	6586	6056	6364	6432	7032	8110	6938	6024	6018	6592	7542	6278	203564	4886.67	788.828	5480.89	379.272	5565.33	923.613	4368.67	866.013	6763.33	733.036	6565.33	594.751
3.4.13.23	6048	4240	4550	5634	5126	5982	5780	6882	5758	6420	6350	6058	7750	5890	4992	5406	5064	4936	3866	3134	4164	4560	3332	2962	5196	4988	4992	5044	5862	6922	7866	6794	7116	8024	8226	7064	202978	4946	966.865	5998.89	510.551	5673	1077.97	3669.67	628.865	5500.67	771.192	7515	595.02
1.2.1.27	5682	4524	4572	5816	5662	6960	6326	7188	6252	7074	6596	7270	8006	5420	4960	4972	3836	4818	3848	3008	4092	4412	4024	3660	5744	5438	5868	5168	5872	7274	6584	5974	6184	6336	7380	6094	202894	4926	655.155	6571.56	595.014	5335.33	1409.12	3840.67	479.422	5894	729.804	6425.33	513.083
1.2.1.18	5682	4524	4572	5816	5662	6960	6326	7188	6252	7074	6596	7270	8006	5420	4960	4972	3836	4818	3848	3008	4092	4412	4024	3660	5744	5438	5868	5168	5872	7274	6584	5974	6184	6336	7380	6094	202894	4926	655.155	6571.56	595.014	5335.33	1409.12	3840.67	479.422	5894	729.804	6425.33	513.083
3.1.4.52	4506	3906	3938	5522	5386	7196	6604	7546	6966	5800	6020	7222	5466	3990	3530	4254	4382	5064	4522	3946	4492	6224	4584	4050	6776	6510	6632	6618	6508	8588	5724	5382	5354	6162	7350	5444	202164	4116.67	337.552	6473.56	809.272	4447.67	708.556	4636.33	821.909	6938.67	813.985	5902.67	771.551
3.4.21.92	4924	4020	4144	5380	4362	5728	5056	5940	4948	5484	5394	5802	7764	5184	4814	5746	5936	5004	4322	3718	4638	5750	4294	3590	5802	5402	5758	5692	6558	7112	7276	6948	7106	7510	8168	6760	202034	4362.67	490.067	5343.78	492.432	5741.33	1081.05	4385.33	776.711	6054	645.081	7294.67	500.214
3.1.1.83	5212	4222	4264	4868	4346	5268	5494	5748	5388	5144	5514	5424	7394	5842	4582	4736	4342	4232	3964	3634	4916	4934	3208	2696	7388	7232	7418	5664	6438	7720	7584	6952	6930	7458	8704	7114	201974	4566	559.846	5243.78	418.466	5188	1224.36	3892	906.02	6976.67	773.946	7457	666.565
3.1.3.15	5966	4558	4528	4314	3562	4500	4616	5014	4952	4484	4850	4568	7640	5458	4540	5678	6454	4090	4386	3666	4396	5828	4028	3264	7464	7102	7252	8602	8182	10404	6446	5842	6000	6348	6550	5966	201498	5017.33	821.706	4540	434.364	5643.33	1289.15	4261.33	882.231	8167.67	1237.68	6192	292.389
4.1.99.12	5488	4384	4378	5736	4848	5662	5628	6670	5042	6010	6166	5770	6566	4994	4480	5252	5406	4814	4370	3572	4302	5714	4352	3936	6112	5626	5772	6866	6524	8164	6444	5950	5962	6876	7440	6134	201410	4750	639.134	5725.78	549.985	5252	721.762	4374.33	726.131	6510.67	932.432	6467.67	591.226
3.5.99.10	6184	4118	4664	6994	5980	7146	6968	8306	6274	8236	8328	7368	7600	5396	4190	4718	4834	4136	3564	3022	3914	4292	3818	3030	5674	5024	5122	5472	6104	7292	5530	4946	5302	5580	6706	5356	201188	4988.67	1070.58	7288.89	863.936	5145.67	1288.35	3606.67	506.951	5781.33	836.864	5570	599.865
2.1.3.3	4552	3706	3650	5480	4830	5760	5754	6746	5786	6280	6386	5874	6576	5218	4570	5258	5158	4738	4104	3620	4420	4728	3578	2840	7004	6436	6718	7944	6870	9268	6130	5530	5696	6706	7318	5858	201090	3969.33	505.38	5877.33	555.38	5253	706.02	3881.67	678.42	7373.33	1059.55	6206.33	682.715
3.1.3.100	5370	4110	4082	3632	3424	4146	4486	4478	4640	4458	4616	4570	7296	5304	4516	5818	7424	4700	3718	3148	4066	4808	3254	2650	7206	6962	7310	8498	7840	9848	7572	6766	6670	7602	8262	6652	199902	4520.67	735.677	4272.22	448.605	5843	1262.48	3607.33	763.746	7944	1082.02	7254	660.287
1.1.1.25	5606	4300	4438	5572	4654	5776	5926	6448	5862	5954	6622	5716	7494	5394	4266	5052	4800	4176	4060	3604	4228	5240	3804	3142	7110	6786	6854	7202	6962	9072	5554	5194	5198	5766	6526	5536	199894	4781.33	717.508	5836.67	559.001	5197	1216.79	4013	710.432	7331	866.865	5629	492.471
3.1.5.1	5014	4136	4166	4716	4356	5638	5358	5612	5706	5514	5884	5372	7208	5548	4618	5330	5852	4550	4450	3806	4604	5172	3798	3292	6612	5906	6464	6798	6616	8924	6468	6088	6056	6810	7340	6054	199836	4438.67	498.479	5350.67	497.608	5517.67	974.774	4187	679.822	6886.67	1043.81	6469.33	522.088
2.7.1.23	5448	4022	4208	5044	4250	5348	5396	6206	5538	5526	6036	5722	6410	4818	4202	5054	5594	4442	4840	4062	5206	5856	4108	3466	7134	6420	6856	6968	6730	8732	5906	5366	5256	5980	6358	5664	198172	4559.33	775.207	5451.78	572.338	5086.67	809.948	4589.67	873.979	7140	816.24	5755	411.251
1.11.1.10	3188	2420	2616	7152	5830	7106	6960	8550	6728	7448	7394	7036	6730	5238	4092	4410	3674	4424	3516	3224	3966	5020	3202	2618	6648	6106	6442	5872	6138	7744	6082	5338	5584	6244	7770	5612	198122	2741.33	399.046	7133.78	713.923	4761.33	1092.74	3591	827.167	6491.67	671.275	6105	882.593
1.7.2.1	6646	4818	4880	7748	6516	7396	7594	8402	7054	7834	8308	7186	9584	7114	5822	7436	6914	6096	2772	2214	3180	3154	5290	5752	2920	2986	2964	2114	2434	2990	5622	5294	5090	5318	5198	5200	197840	5448	1037.96	7559.78	601.331	7161	1336.93	3727	1440.3	2734.67	371.735	5287	183.049
2.4.1.15	4130	3352	3326	5726	4950	5964	6290	6958	5542	6554	6820	6500	6936	5128	3950	4796	4390	4490	3740	3342	4442	5240	3730	3002	6350	6172	6552	6624	6168	8090	6458	5826	6054	6696	7208	5828	197324	3602.67	456.869	6144.89	654.874	4948.33	1051.17	3916	807.477	6659.33	725.833	6345	548.1
2.7.8.13	5724	4518	4516	5032	4322	5316	5144	5852	5310	5476	6038	5468	7158	5376	4792	5716	5692	4906	3894	3438	4030	5034	4030	3350	5956	5886	5864	7070	6422	8176	6452	5962	5658	6566	6954	5830	196928	4919.33	696.862	5328.67	494.236	5606.67	852.49	3962.67	602.025	6562.33	915.868	6237	499.013
2.1.1.176	5350	4166	4182	4942	4266	4950	5050	5948	5062	5182	5682	5440	6236	4726	4228	4686	5198	3946	4214	3456	4362	5412	4080	3076	6076	5900	6384	6770	6958	8334	7442	6370	6548	7486	8208	6600	196916	4566	679.011	5169.11	485.3	4836.67	810.852	4100	808.294	6737	878.913	7109	718.435
2.7.8.5	4674	3758	3604	4670	4294	5136	5142	5322	5098	5264	5512	5132	6036	4758	3686	4220	3756	3754	4070	3876	4660	5196	3576	2856	7208	6926	7156	7338	6964	9038	7384	6706	6644	7898	8594	6972	196878	4012	578.457	5063.33	366.137	4368.33	913.553	4039	820.448	7438.33	798.654	7366.33	762.03
2.7.7.108	3536	4090	2982	4144	3582	4324	4046	4254	4770	3794	4210	4444	7070	5000	4542	6440	7904	4618	3984	3604	3858	5904	3572	3248	8248	8468	8644	8540	7800	9780	5890	5238	5678	6432	7954	6134	196726	3536	554	4174.22	348.292	5929	1412.03	4028.33	953.554	8580	659.828	6221	940.859
5.4.2.11	4890	3726	3662	4844	4548	4982	5238	5702	5064	4816	5496	5318	7412	5618	4728	5252	4844	4358	3752	3358	4144	5082	3400	2860	6944	6308	6730	5792	6486	7958	7288	6662	6952	7544	8142	6740	196640	4092.67	691.252	5112	362.389	5368.67	1091.62	3766	774.105	6703	730.325	7221.33	560.939
2.6.1.45	4954	3882	4154	6680	5828	6734	6642	7782	6132	7012	7370	6486	7132	5266	4310	5398	4618	4552	4222	3606	4444	5014	4396	3400	6460	6010	6404	5840	6250	7452	4530	4522	4106	4950	4878	4782	196198	4330	557.25	6740.67	595.379	5212.67	1032.08	4180.33	591.869	6402.67	565.416	4628	310.877
2.3.3.9	5794	4410	4460	5464	4646	5654	5934	6514	5338	6194	6268	6070	7084	5408	4886	5076	4908	4550	4204	3146	3790	5314	4660	4238	5968	5784	5828	5102	6044	6538	5744	5324	5246	6576	7834	5870	195868	4888	785.017	5786.89	575.84	5318.67	908.842	4225.33	738.813	5877.33	465.782	6099	974.11
6.2.1.16	4944	3220	3952	5116	4736	5438	4892	5822	4872	4600	5168	4914	6040	4856	3928	4348	4518	2924	4592	3648	4776	5034	4478	4012	7086	6996	7214	6298	6668	7694	7360	6846	6792	7492	7694	6502	195470	4038.67	865.261	5062	377.451	4435.67	1030.33	4423.33	509.718	6992.67	476.98	7114.33	466.873
2.4.2.28	5436	4074	4272	5442	4654	6016	6100	6580	5844	6166	6648	6022	7048	5326	4376	5408	4962	4682	3902	3404	4210	4506	3670	3006	5972	5718	5950	6648	5912	8404	5846	5256	5186	6068	6856	5718	195288	4594	735.883	5941.33	603.225	5300.33	939.977	3783	543.941	6434	1015.83	5821.67	610.887
1.2.1.41	4194	3634	3548	4972	4428	5338	5216	6124	5668	5354	5702	5344	6454	4926	4346	5118	4648	4282	4190	3522	4364	5872	3782	3368	6656	6448	6928	6256	6500	7888	7056	6074	6306	6868	7822	6084	195280	3792	350.788	5349.56	478.96	4962.33	799.018	4183	910.766	6779.33	587.902	6701.67	684.163
2.3.1.189	4024	3202	3354	3766	3472	4492	4282	4440	5118	4408	4790	4318	7904	6318	4692	5618	4878	4870	3548	3380	4414	4554	2414	1706	6640	6438	6342	5726	5636	7690	8952	7936	7826	9686	9976	8142	194952	3526.67	437.357	4342.89	491.45	5713.33	1234.98	3336	1113.51	6412	743.454	8753	928.004
2.7.7.41	6032	4432	4462	4856	4362	5122	5368	6012	5068	5588	6018	5596	7500	5076	4510	5030	5164	4142	3698	3156	4114	4902	3636	2736	6772	6282	6744	6746	6692	8520	6024	5712	5736	6328	6978	5700	194814	4975.33	915.223	5332.22	542.079	5237	1176.68	3707	754.352	6959.33	786.499	6079.67	503.826
2.7.7.87	4372	3148	3556	3650	3128	4122	4206	4502	4178	4104	4106	4274	6230	4690	3992	5174	5994	3930	3916	3636	4286	5660	3528	2978	7502	6632	7288	8090	7450	9588	7914	6930	7094	8000	9202	7332	194382	3692	623.23	4030	405.111	5001.67	978.597	4000.67	921.327	7758.33	1010.77	7745.33	833.67
3.1.4.53	4380	3422	3366	5114	4360	5268	5176	5986	4658	5418	5346	5254	7008	5194	4528	4838	4446	4072	3960	3472	4228	4318	3826	3280	7628	6864	7144	7010	7160	8484	6488	6172	6088	6468	7624	6200	194248	3722.67	569.956	5175.56	460.453	5014.33	1047.43	3847.33	410.445	7381.67	597.922	6506.67	571.245
4.2.1.51	4240	3528	3540	5800	4834	5972	5732	6314	5582	5764	6684	5976	5760	4558	3906	4618	4682	4456	3956	3480	4538	4680	3654	3534	6564	6228	6372	6374	6866	8498	6168	5614	5794	6640	7270	5762	193938	3769.33	407.653	5850.89	508.614	4663.33	605.428	3973.67	520.94	6817	852.451	6208	638.626
1.3.1.9	4948	3822	4024	6164	5254	6252	6246	7792	5924	6876	6986	6670	7196	5228	4326	5126	5890	4610	3906	3268	3936	4532	3710	3030	5854	5510	5754	5708	5930	7464	5250	5040	5102	5174	6326	5094	193922	4264.67	600.341	6462.67	723.395	5396	1034.2	3730.33	533.003	6036.67	713.768	5331	492.854
1.12.1.2	5434	4332	4222	2282	2228	2492	2792	2866	3388	2818	3260	3220	8864	6414	5528	6262	7972	3810	3662	3210	3424	5406	2234	1904	9214	8224	8742	8402	8148	9684	7408	6960	6894	7904	7410	6798	193812	4662.67	670.255	2816.22	422.269	6475	1788.66	3306.67	1238.92	8735.67	607.728	7229	422.084
1.5.8.4	6982	5056	5222	6072	5134	5932	5600	6048	4958	5162	5310	5552	8254	5486	4652	5252	4574	4364	4802	3546	4566	5492	7516	7322	3728	3736	3878	3522	4608	4880	6042	5400	5580	6580	7296	5652	193756	5753.33	1067.29	5529.78	417.867	5430.33	1448.04	5540.67	1584.41	4058.67	549.629	6091.67	724.551
6.3.4.19	4736	3612	3878	4560	4052	5028	5204	5844	4822	5560	5514	5216	6236	4604	3902	4582	5460	3912	4076	3604	4382	4832	3394	2890	6836	6642	6636	8204	7272	9446	6380	5700	5896	6558	7868	6338	193676	4075.33	587.409	5088.89	551.369	4782.67	913.978	3863	705.331	7506	1118.74	6456.67	762.756
1.14.15.7	5086	3412	3610	6060	5226	6080	5406	6594	4916	5606	5866	6040	7526	4790	4328	4570	3720	3752	3836	3304	4034	5592	4622	4146	7212	6996	7642	5274	7640	7234	5764	5130	5328	5812	6170	5312	193636	4036	914.7	5754.89	515.252	4781	1412.05	4255.67	782.68	6999.67	883.239	5586	393.292
1.3.1.12	4342	3596	3582	4784	4414	5324	5504	6050	5620	5480	5712	5478	6994	5526	4350	5412	5418	4534	3908	3514	4364	4890	3570	3014	6818	6258	6940	6278	6358	8254	6156	5718	5672	6484	7278	5964	193558	3840	434.801	5374	492.809	5372.33	938.621	3876.67	668.593	6817.67	760.76	6212	601.767
1.1.1.94	4304	3408	3396	4436	3780	4832	4694	5150	4628	5082	5142	4756	5778	4508	3964	4638	4856	3852	4722	3878	4792	6084	4044	3302	7102	6772	6936	7422	7590	8788	6776	6462	6366	7230	7576	6478	193524	3702.67	520.805	4722.22	430.293	4599.33	696.725	4470.33	966.266	7435	728.596	6814.67	488.394
1.8.98.1	4946	4110	4196	4494	3990	5164	5222	5170	6222	5314	5720	5168	5328	4822	3722	4220	4256	4136	5198	4272	5288	3572	2846	2242	7556	7174	7548	10850	6900	11634	5406	5186	4894	5562	5794	5214	193336	4417.33	459.854	5162.67	640.466	4414	569.317	3903	1242.35	8610.33	2068.19	5342.67	315.665
4.2.1.49	6620	5326	5454	4240	3814	4622	4360	4694	4346	4592	4622	4642	7688	6108	5504	6544	7308	4978	3676	3046	3534	4048	4022	3496	5506	5006	5076	6972	5920	7830	6582	6162	6266	6912	7386	6226	193128	5800	713.019	4436.89	283.217	6355	1039.44	3637	373.748	6051.67	1128.71	6589	481.251
2.7.7.9	4436	3458	3448	4568	3712	4884	4904	5514	5170	5264	5178	5370	6292	4902	4134	4270	4136	3868	4036	3540	4568	5368	3272	2892	7588	7154	7274	6766	6774	8788	6968	6170	6212	7336	8096	6642	192952	3780.67	567.557	4951.56	545.263	4600.33	897.914	3946	910.725	7390.67	752.541	6904	734.554
1.1.1.37	5538	4176	4364	5434	4868	5380	5574	6414	5636	6674	6466	6182	6746	4926	4314	5032	5210	4964	3662	3016	3810	4554	4034	3838	5788	5334	5872	5834	6020	7076	5814	5484	5480	6356	7120	5808	192798	4692.67	738.09	5847.56	608.99	5198.67	816.602	3819	501.268	5987.33	581.318	6010.33	630.652
2.5.1.141	5848	4668	4446	5592	4904	5674	5776	6764	5626	6046	6460	5950	6812	4838	3950	5316	5142	4522	3502	3152	4050	4572	3786	3512	5660	5228	5758	5342	5700	6884	6106	5910	5806	6294	7318	5618	192532	4987.33	753.579	5865.78	536.398	5096.67	970.003	3762.33	498.361	5762	589.017	6175.33	606.961
2.8.1.8	4782	3890	3740	4750	4346	5032	5110	5516	5014	5292	5962	5414	6318	4722	4178	4792	5032	4208	4232	3416	4174	5420	3980	3058	6678	6204	6524	7022	6726	8474	6238	5648	5900	6550	7882	6028	192252	4137.33	563.313	5159.56	464.055	4875	783.313	4046.67	814.402	6938	798.63	6374.33	799.375
2.1.1.63	5012	3624	4022	5954	4974	6168	5972	6750	5802	6404	6578	6274	6214	4656	3718	4202	4068	3954	3722	3330	3748	4326	3632	3284	6612	6462	6758	6074	6118	7754	5642	5342	5696	6012	7522	5748	192128	4219.33	714.732	6097.33	521.131	4468.67	910.089	3673.67	375.522	6629.67	613.121	5993.67	778.901
2.1.1.190	5040	3940	4046	3996	3544	4604	4766	4932	4588	4384	4790	4810	6738	5146	4492	5500	6114	4424	4228	3470	4188	4998	3748	2810	6552	6370	6798	7584	7174	9132	6478	6150	6140	6606	7720	6068	192068	4342	606.805	4490.44	452.317	5402.33	911.215	3907	747.254	7268.33	1012.24	6527	622.008
2.5.1.29	3376	3320	2986	4452	3716	5030	5050	5380	5196	4934	5274	5098	5746	4706	3620	5066	5014	4156	4326	3738	4678	5588	3898	3278	7414	7210	7436	7846	7840	9862	6226	5592	5708	6614	6844	5830	192048	3227.33	210.868	4903.33	517.218	4718	746.605	4251	813.638	7934.67	977.378	6135.67	511.977
5.4.3.2	4076	3736	3452	3948	3270	4322	4394	4560	5494	4438	4902	4124	6808	5646	5042	6744	7888	5290	3010	2514	2832	2924	2506	2196	7304	6660	6794	10732	7780	11132	6450	6032	6032	6650	6334	5992	192008	3754.67	312.419	4383.56	616.132	6236.33	1093.89	2663.67	310.492	8400.33	2004.72	6248.33	271.533
1.14.14.35	5180	3330	3790	6608	5632	6800	6854	7430	6444	6998	7162	6750	7096	5136	4122	3996	2656	3640	3326	3208	4148	5486	3058	2574	6488	6652	7082	4786	6362	7198	5168	4712	4902	5192	6208	5158	191332	4100	963.172	6742	508.689	4441	1527.07	3633.33	1041.71	6428	868.897	5223.33	518.189
3.1.3.12	3538	3242	2754	5240	4750	5220	5546	6370	5248	6096	6324	5870	6272	5100	4378	4424	4386	3912	4128	3822	4552	5918	3510	3166	7220	6990	7252	7832	7520	9412	5230	4766	4726	5326	6048	4982	191070	3178	395.899	5629.33	564.753	4745.33	838.839	4182.67	976.417	7704.33	884.97	5179.67	488.663
4.4.1.5	4710	3636	3616	6998	6174	7280	6928	7968	5996	7268	7346	7096	6722	5206	4522	4862	4408	4608	3244	2996	3690	4740	3728	3382	5632	5404	5672	4762	5516	6684	5210	4668	4646	5258	5666	4788	191030	3987.33	625.928	7006	603.255	5054.67	865.037	3630	609.551	5611.67	620.993	5039.33	406.306
4.2.1.135	4566	3658	3734	4760	4004	4928	4988	5606	4988	5222	5416	4948	6114	4814	3984	5210	5710	4048	3518	3168	4124	4214	3110	2754	7278	6650	7170	6990	6646	9036	6216	5934	5944	6764	8398	6328	190940	3986	503.73	4984.44	453.485	4980	867.174	3481.33	585.875	7295	891.88	6597.33	933.273
1.13.12.16	5264	3818	4030	5006	4186	5254	5110	5936	4870	5504	6032	5392	6504	4750	3978	4730	4954	4226	3618	3254	4016	5100	3866	3302	6504	6236	6516	6604	6572	8264	6080	5864	5906	6542	7334	5702	190824	4370.67	780.877	5254.44	561.501	4857	885.483	3859.33	678.105	6782.67	737.328	6238	609.261
6.3.2.6	4936	3728	4088	5034	4358	5054	5130	5574	4776	5354	5416	5028	6524	5034	4254	4910	5522	4238	3914	3464	4058	4858	3940	3278	6366	6120	6458	6570	6542	8140	6370	5736	5880	6570	7344	6088	190654	4250.67	620.211	5080.44	362.923	5080.33	860.553	3918.67	551.256	6699.33	724.152	6331.33	583.316
3.2.1.14	4368	3478	3672	4646	3928	5342	5384	5902	5700	4850	5550	4932	5636	4416	3550	3812	4524	3678	5486	3820	4676	4058	3434	2936	8522	7776	8130	9054	7442	10646	5312	5370	4898	5310	5002	5204	190444	3839.33	468.001	5137.11	612.674	4269.33	778.513	4068.33	908.336	8595	1152.3	5182.67	190.874
1.18.1.2	4482	3666	3670	4938	4392	5582	5328	5718	5348	5764	6260	5692	6562	4954	4078	5110	5266	4498	3620	2932	3664	4344	3306	3134	6548	5864	6150	6992	6254	8504	6134	5676	5590	6648	7736	5778	190182	3939.33	469.967	5446.89	537.264	5078	847.396	3500	499.569	6718.67	955.092	6260.33	820.643
2.6.1.102	4576	3318	3650	4900	4180	5212	5568	6566	5566	6128	6434	5484	7010	5878	4534	5082	5422	4492	4044	3414	4586	3764	3270	2800	6562	5898	5972	7538	6238	9108	5382	4938	4990	5668	6232	5272	189676	3848	651.954	5559.78	755.44	5403	948.32	3646.33	627.191	6886	1240.87	5413.67	481.909
3.1.13.5	3782	3378	2984	5074	4328	5412	5426	6052	5112	5026	5442	5392	6790	4700	3764	4862	4292	4250	4150	3646	4504	4984	3786	3080	6740	6100	6298	6662	6314	8256	6388	5556	6024	6662	8082	6372	189670	3381.33	399.01	5251.56	462.021	4776.33	1058.72	4025	672.091	6728.33	786.125	6514	857.255
1.14.13.22	3052	2404	2258	6648	5790	6988	6056	7242	5362	6410	6156	6686	5608	4162	3438	3686	2654	3708	3810	3380	4196	4988	3200	2926	6468	6476	6770	4678	7406	6868	6552	6132	6336	6456	7902	6524	189376	2571.33	422.622	6370.89	593.496	3876	982.962	3750	755.452	6444.33	930.79	6650.33	632.066
6.3.3.1	4482	3756	3864	4856	4370	5020	4904	5558	4420	5316	5678	5118	6208	4880	4146	5142	5574	4640	3780	3060	4362	4702	3626	3090	6462	6340	6460	7210	6906	8158	6214	5744	5624	6592	7076	5740	189078	4034	391.719	5026.67	453.056	5098.33	724.459	3770	664.293	6922.67	689.153	6165	577.096
2.8.3.16	4316	3364	3320	8602	7594	8398	8808	9946	7422	9442	9306	8420	5948	4464	3606	3810	2482	4434	3600	2964	4074	3922	3830	3358	4960	5028	5372	4002	5092	5886	3876	3552	3724	3856	3952	3646	188376	3666.67	562.769	8659.78	829.393	4124	1149.07	3624.67	410.041	5056.67	618.218	3767.67	152.8
1.1.1.38	3466	3342	3070	5358	4660	5592	5562	5888	5282	6202	6502	5852	6168	5064	3952	5064	4322	5234	3728	3492	4560	4672	3582	3118	5494	5276	5502	5386	6088	7032	6592	6180	6026	6760	7926	6104	188098	3292.67	202.557	5655.33	540.798	4967.33	771.849	3858.67	621.294	5796.33	667.697	6598	712.153
1.1.1.133	4050	3060	3330	4538	3872	4918	5058	5484	5030	5154	5564	5176	6434	5050	4168	4900	6006	4046	3876	3334	4338	4546	2820	2168	7180	6804	7038	7162	6500	9204	6282	5830	5668	6614	6878	5642	187722	3480	511.762	4977.11	512.243	5100.67	961.502	3513.67	916.602	7314.67	960.42	6152.33	520.665
4.1.1.49	6038	4334	5002	5810	5080	6232	6060	6740	6068	6198	6518	5926	7332	5750	4874	6098	6352	5322	4114	3340	3876	4362	4772	4158	4910	4072	4730	6166	5250	6528	4278	3986	3972	4326	4740	4184	187498	5124.67	858.597	6070.22	469.144	5954.67	858.541	4103.67	479.892	5276	921.083	4247.67	282.122
2.5.1.15	4518	3616	3732	4724	4104	5126	4970	5362	4722	5378	5622	5206	5506	4162	3528	4638	4818	4016	3772	3210	4024	4794	3508	2736	6190	5676	6120	6532	6312	8430	7102	6276	6314	7388	8406	6478	187016	3955.33	490.723	5023.78	457.057	4444.67	693.847	3674	708.407	6543.33	966.383	6994	825.206
2.3.1.286	4500	3404	3720	4896	4398	5468	5482	6196	5346	5754	5870	5654	6154	5066	4270	4702	4952	4538	4204	3498	4430	4386	3420	2994	6160	5886	5938	7460	6564	9104	5484	4844	5070	5440	6110	5352	186714	3874.67	564.132	5451.56	535.34	4947	656.76	3822	597.637	6852	1246.72	5383.33	431.608
2.3.1.313	4492	3386	3716	4882	4394	5448	5472	6190	5334	5736	5858	5648	6142	5060	4266	4700	4952	4536	4196	3496	4426	4386	3412	2982	6158	5884	5928	7456	6558	9094	5474	4834	5062	5430	6106	5338	186432	3864.67	567.79	5440.22	534.545	4942.67	653.36	3816.33	600.428	6846.33	1244.99	5374	433.405
3.5.1.16	4968	3580	3864	5500	4648	5464	5626	6206	5472	5678	6102	5450	6734	5050	4188	4796	5010	4436	3886	3298	3906	4166	3720	3188	6098	5896	6160	5756	6154	7304	5642	5206	5356	6008	5940	5550	186006	4137.33	733.259	5571.78	446.166	5035.67	896.747	3694	378.978	6228	550.96	5617	316.027
2.7.1.26	4684	3654	3776	4758	4072	5048	4904	5788	4950	5114	5594	5150	5746	4460	3918	4518	5136	4130	3868	3184	4184	4788	3408	2730	7126	6312	6530	7476	6554	8926	6092	5266	5628	5990	6772	5430	185664	4038	562.768	5042	490.812	4651.33	677.813	3693.67	740.055	7154	969.824	5863	546.621
3.1.2.2	5112	4012	3898	5336	4752	5584	6126	6956	5750	6310	6642	6126	5494	4132	3316	4144	4630	3764	3460	2962	3612	4552	3226	2752	6204	6004	6150	6772	6560	8372	5506	5044	5022	5434	5970	5324	185010	4340.67	670.422	5953.56	677.172	4246.67	751.742	3427.33	634.538	6677	877.511	5383.33	349.577
3.6.1.1	4346	3774	3544	4658	3870	5074	5158	5702	5230	5116	5384	5102	6368	5002	4056	5356	5324	4568	3872	3302	4074	4916	3640	2970	6524	6042	6236	5872	6208	7752	5820	5472	5374	6176	6998	5408	184288	3888	412.975	5032.67	516.202	5112.33	788.059	3795.67	676.477	6439	678.949	5874.67	630.278
3.2.2.31	4438	3504	3470	4272	3588	4498	4632	5084	4640	4886	5142	4472	6070	4528	4186	4836	4934	3922	4132	3550	4174	5088	3562	2774	7068	6710	6906	6890	6714	8582	6022	5604	5488	6360	7276	5804	183806	3804	549.323	4579.33	469.988	4746	753.196	3880	780.059	7145	716.663	6092.33	657.949
3.5.1.42	4904	3974	3942	5090	4380	5302	5284	5746	5354	5528	5798	5412	5852	4702	4086	4908	5108	4038	3756	3410	4058	4700	3210	2646	6374	6122	6162	7594	6718	8990	5062	4814	4674	5094	6046	4772	183610	4273.33	546.408	5321.56	418.471	4782.33	679.912	3630	712.322	6993.33	1118.68	5077	502.808
3.2.2.21	4610	3510	3704	5016	4380	5026	4972	5968	4810	5518	5408	5038	5856	4416	3782	4490	4028	3922	3456	2880	4010	4830	3472	2914	5730	5740	5924	5458	6192	7514	7000	6052	6168	7084	8194	6324	183396	3941.33	587.15	5126.22	454.434	4415.67	758.368	3593.67	735.782	6093	737.185	6803.67	806.141
1.2.1.70	4818	3950	3916	4258	3760	4610	4390	5070	4742	4836	5244	5010	5568	4442	3750	4708	4572	4188	4118	3278	4342	4882	4076	3288	6338	5934	6190	6642	6336	8212	6356	5790	5780	6414	7358	5822	182988	4228	511.238	4657.78	463.184	4538	607.226	3997.33	623.342	6608.67	818.517	6253.33	613.419
1.5.3.24	4426	3928	3596	6752	5732	6414	6066	6832	5466	6410	6554	5944	6894	4676	3988	4298	4096	3680	4268	3336	4210	4296	6022	5930	5784	5152	5176	5832	5478	7568	4120	3284	3768	3784	4790	4110	182660	3983.33	417.758	6241.11	467.092	4605.33	1169.12	4677	1068.44	5831.67	898.226	3976	502.052
3.2.1.135	4390	3394	3606	3128	2624	3714	3468	3808	4410	3414	4030	3816	8574	6258	5066	7166	8758	4862	3160	2812	3456	5200	2844	2354	6052	5520	5626	8164	6882	9142	5798	5414	5758	6266	6678	5696	181308	3796.67	524.661	3601.33	520.97	6780.67	1683.38	3304.33	999.482	6897.67	1474.53	5935	456.129
1.17.7.1	4302	3560	3468	4782	4232	4756	4796	5750	4414	5338	5516	5556	5910	4384	3726	4158	4426	3884	3656	3152	3806	4082	3576	2890	5866	5626	6020	6802	6438	7810	6494	5848	6014	6328	7640	6062	181068	3776.67	457.272	5015.56	539.891	4414.67	782.156	3527	436.188	6427	796.92	6397.67	651.081
1.17.7.3	4302	3560	3468	4782	4232	4756	4796	5750	4414	5338	5516	5556	5910	4384	3726	4158	4426	3884	3656	3152	3806	4082	3576	2890	5866	5626	6020	6802	6438	7810	6494	5848	6014	6328	7640	6062	181068	3776.67	457.272	5015.56	539.891	4414.67	782.156	3527	436.188	6427	796.92	6397.67	651.081
1.3.3.15	3150	2898	2482	3866	3230	3944	4026	4374	4158	4542	4594	4408	5898	4672	3886	4600	4088	4068	3662	3406	4340	4678	2564	1918	6568	6318	6834	6872	6928	8328	7906	7242	7094	7940	8644	6860	180986	2843.33	337.339	4126.89	425.392	4535.33	737.545	3428	1046.53	6974.67	701.513	7614.33	667.793
1.3.3.4	3150	2898	2482	3866	3230	3944	4026	4374	4158	4542	4594	4408	5898	4672	3886	4600	4088	4068	3662	3406	4340	4678	2564	1918	6568	6318	6834	6872	6928	8328	7906	7242	7094	7940	8644	6860	180986	2843.33	337.339	4126.89	425.392	4535.33	737.545	3428	1046.53	6974.67	701.513	7614.33	667.793
2.6.1.52	4768	3766	3824	4134	3612	4716	4218	4998	4358	4398	4800	4628	5812	4188	3932	5104	5460	4150	3682	3190	3798	5046	3550	3038	6270	6310	6540	6548	7054	8208	6344	5612	5678	6206	7216	5816	180972	4119.33	562.51	4429.11	416.595	4774.33	787.233	3717.33	712.837	6821.67	734.339	6145.33	600.13
2.7.8.35	3934	3210	3164	5016	4362	4848	5268	5750	5248	5352	5740	5402	6726	5204	3898	4454	4242	3804	3704	3182	3960	3936	2628	2312	7136	6546	6704	6988	6060	8610	5566	5502	5350	5760	5952	5356	180874	3436	431.894	5220.67	436.047	4721.33	1102.02	3287	699.135	7007.33	870.373	5581	236.7
2.7.8.33	3934	3210	3164	5016	4362	4848	5268	5750	5248	5352	5740	5402	6726	5204	3898	4454	4242	3804	3704	3182	3960	3936	2628	2312	7136	6546	6704	6988	6060	8610	5566	5502	5350	5760	5952	5356	180874	3436	431.894	5220.67	436.047	4721.33	1102.02	3287	699.135	7007.33	870.373	5581	236.7
4.1.1.71	2490	2274	2124	4150	3766	4670	4048	4608	4266	4274	4114	4870	4722	3562	3184	3296	2508	3740	3728	3468	4474	5392	3072	2434	5568	5916	5864	4590	6220	6990	9814	8478	8518	10404	10760	8414	180770	2296	183.989	4307.33	347.089	3502	732.153	3761.33	1047.96	5858	788.39	9398	1061.06
2.2.1.5	2490	2274	2124	4150	3766	4670	4048	4608	4266	4274	4114	4870	4722	3562	3184	3296	2508	3740	3728	3468	4474	5392	3072	2434	5568	5916	5864	4590	6220	6990	9814	8478	8518	10404	10760	8414	180770	2296	183.989	4307.33	347.089	3502	732.153	3761.33	1047.96	5858	788.39	9398	1061.06
3.5.4.2	4734	3296	3868	5094	4470	5674	5722	6048	5922	5770	6246	5600	6436	5214	4142	5190	5450	4524	4240	3602	4126	3790	3306	3118	6114	5444	5456	7524	5552	8694	4226	4022	3956	4506	5136	4368	180580	3966	723.992	5616.22	536.369	5159.33	794.595	3697	443.776	6464	1349.61	4369	428.599
1.4.3.16	3324	3300	2652	4336	3826	4900	4594	5174	4746	5072	5204	5128	5198	4244	3840	4366	5242	4042	3582	3388	4038	4246	3046	2612	6844	6558	6684	7954	7250	9184	5930	5562	5366	6094	6860	5540	179926	3092	381.24	4775.56	460.788	4488.67	594.282	3485.33	609.688	7412.33	1004.18	5892	545.665
2.3.1.234	4476	3642	3474	4568	3830	4888	4776	5426	4796	5030	5412	4734	5944	4636	3890	4772	5346	4034	3932	3404	4136	4574	3368	3076	5932	6084	6028	6900	6626	8230	5622	5098	5238	5706	6250	5416	179294	3864	536.623	4828.89	476.868	4770.33	780.27	3748.33	562.316	6633.33	869.549	5555	409.628
7.2.2.7	4374	3250	3446	5548	4790	5788	5570	6216	4928	5814	6098	5452	7330	5386	4362	4804	4944	3920	3712	3214	3810	4660	3530	3126	5500	4992	5550	4768	5276	6374	5610	4772	5184	5804	6044	5282	179228	3690	600.413	5578.22	479.26	5124.33	1191.65	3675.33	552.226	5410	558.899	5449.33	460.958
7.6.2.11	5328	3586	3882	5212	4498	4988	4640	5422	4684	5204	5356	5268	7500	5268	4394	4906	4088	4180	3546	2872	3292	3910	4514	3664	4712	4482	4882	4440	4914	6108	6614	5818	6250	6850	7672	6110	179054	4265.33	932.121	5030.22	342.16	5056	1279.31	3633	558	4923	612.907	6552.33	659.147
2.1.1.199	4548	3540	3662	4332	3846	4600	4654	5114	4626	4628	4836	4660	5916	4562	3854	4690	5232	3944	3752	3300	4132	4724	3338	2704	6172	6232	6284	7238	6682	8726	5972	5274	5506	5762	6256	5530	178828	3916.67	550.143	4588.44	347.672	4699.67	783.336	3658.33	708.597	6889	984.985	5716.67	355.896
2.3.1.8	3236	2562	2526	3186	2834	3832	3408	4198	4200	3422	3554	4120	5178	3616	3202	3620	3966	3262	4138	3732	4340	4906	3504	2614	7856	7852	7858	7580	7814	9824	7032	6346	6638	7282	8746	6758	178742	2774.67	399.932	3639.33	481.757	3807.33	726.556	3872.33	786.959	8130.67	836.461	7133.67	853.134
1.20.4.4	3380	2572	2638	4450	3492	4486	4448	5226	4300	4580	4774	4846	5654	4334	3560	4360	4226	3452	3380	3086	3928	5048	3216	2572	5892	5646	6050	5470	6280	8120	7498	6684	6718	8136	8710	6610	177822	2863.33	448.662	4511.33	472.834	4264.33	787.733	3538.33	860.036	6243	963.212	7392.67	879.654
3.8.1.5	4350	3256	3278	4456	3970	4500	4498	5012	4108	4578	4350	4144	6234	4812	4100	4136	2988	3108	3870	3782	4618	6768	3712	3224	6366	5854	6252	5116	6762	7356	6728	6158	5920	6616	7002	5754	177736	3628	625.367	4401.78	309.665	4229.67	1198.49	4329	1276.23	6284.33	766.099	6363	492.891
2.1.2.11	4508	3518	3850	5040	4502	5372	5554	6076	5498	5594	5688	5548	6494	4966	3958	4364	4598	4018	3448	3028	3906	4054	3328	2872	5436	5098	5406	5898	5474	6962	5672	5208	5194	5876	6452	5150	177608	3958.67	503.866	5430.22	441.779	4733	940.388	3439.33	468.855	5712.33	663.407	5592	515.341
5.1.3.6	5110	4006	3948	5070	4660	5656	5722	6460	5204	6008	6230	5980	6390	4802	3800	4788	4912	4228	3796	3376	3976	4106	3296	2810	5906	5846	5912	6010	5810	7584	4454	4094	4108	4278	4514	4246	177096	4354.67	654.78	5665.56	586.091	4820	879.27	3560	488.451	6178	692.163	4282.33	173.401
3.1.6.13	2754	3040	2260	4656	3596	4572	4444	5758	4570	4546	4806	4524	6898	4894	4072	5184	5878	3858	4132	3882	5302	5696	3504	3006	6358	6492	6492	8630	9562	10178	3986	3656	3682	3892	4014	3988	176762	2684.67	394.595	4608	550.986	5130.67	1138.53	4253.67	1044.12	7952	1721.1	3869.67	161.083
2.1.1.185	4008	2980	3204	3988	3444	4412	3974	4672	4236	4270	4602	4310	6194	4394	3832	4754	5300	4058	3880	3222	4120	4766	2952	2314	6510	6338	6660	6854	6424	8776	6140	5734	5820	6440	7374	5780	176736	3397.33	540.582	4212	373.143	4755.33	875.877	3542.33	883.741	6927	924.039	6214.67	628.672
2.5.1.75	4336	3286	3392	4116	3782	4466	4552	5320	4850	4770	4774	4912	5700	4404	3656	4594	5286	3712	3534	3138	3916	4296	2940	2622	6526	6202	6110	7502	6830	8812	5644	5262	5056	5728	6240	5500	175766	3671.33	578.053	4615.78	455.36	4558.67	823.223	3407.67	628.045	6997	1021.55	5571.67	410.678
1.19.1.1	4108	3376	3418	4702	4212	5330	5070	5456	5146	5490	5972	5506	6250	4742	3866	4750	4754	4226	3140	2558	3246	3686	2916	2738	5888	5352	5588	6486	5706	7854	5440	5006	5104	5960	7102	5188	175332	3634	411.033	5209.33	512.267	4764.67	812.997	3047.33	402.078	6145.67	920.307	5633.33	796.635
3.1.1.117	2710	3116	2286	4348	3576	4592	4994	5900	5308	5446	6100	5126	6334	4518	3666	4318	5528	3766	2308	2016	2814	2924	1792	1604	8510	8270	8212	13112	10098	13702	3122	2984	2962	2978	2968	3164	175172	2704	415.033	5043.33	785.186	4688.33	1046.45	2243	539.866	10317.3	2498.19	3029.67	89.1149
2.4.2.18	4196	3282	3614	4322	3882	4546	4632	5062	4784	5174	5156	4710	5380	4290	3574	4356	4406	3670	4068	3404	4058	4970	3466	3060	6104	6100	6246	6262	6272	7534	5672	5304	5392	6178	6586	5230	174942	3697.33	462.663	4696.44	419.977	4279.33	648.427	3837.67	680.404	6419.67	551.434	5727	544.513
3.1.1.31	3604	2740	2914	5088	4284	5476	5582	6276	5662	6004	6210	5890	5672	4474	3316	3982	3764	3996	3332	3086	3724	4232	2958	2706	6528	6346	5992	6310	5986	8096	5200	4814	4784	5510	5512	4772	174822	3086	456.96	5608	621.426	4200.67	812.718	3339.67	557.778	6543	789.808	5098.67	356.951
2.3.1.29	5118	4278	3974	4362	3830	4730	4818	5052	4964	4810	5324	4918	6720	5172	4402	5554	6496	4670	3256	2782	3414	4158	3626	3266	5396	4840	4890	6924	5986	7818	5078	4640	4580	4864	5402	4620	174732	4456.67	592.558	4756.44	432.997	5502.33	947.142	3417	457.103	5975.67	1191.47	4864	324.225
3.1.1.81	3378	2588	2572	5760	5204	6078	5984	6902	6170	6594	6698	6240	5340	4142	3402	3702	2826	3656	4224	3862	4434	4406	3232	2566	6300	5662	6284	5888	5998	7898	4542	4062	3972	4420	5514	4224	174724	2846	460.795	6181.11	517.505	3844.67	850.178	3787.33	747.961	6338.33	801.628	4455.67	560.602
4.2.1.24	4010	3462	3324	4598	4242	4862	4606	5262	4452	4978	5030	4686	5974	4462	3794	4700	4436	4170	3668	3368	3898	4816	3574	3202	5926	5428	5730	5680	6014	7006	5838	5132	5226	6362	6712	5498	174126	3598.67	362.846	4746.22	316.178	4589.33	745.341	3754.33	573.075	5964	549.985	5794.67	634.943
3.5.1.6	5032	3594	3882	5938	5170	6030	6112	7052	5682	6354	6376	6154	5818	4642	3734	3380	2962	3780	4354	3392	4402	4588	4496	3842	5594	4862	5134	6250	5974	7918	3724	3312	3474	3626	4084	3380	174098	4169.33	760.843	6096.44	514.868	4052.67	1027.78	4179	464.986	5955.33	1089.93	3600	281.967
3.5.4.26	3732	3146	3024	4392	3656	4764	4726	5158	4148	5080	5162	4762	4916	3764	3182	3982	4214	3432	4036	3344	4106	5014	3320	2966	6140	5796	6042	6500	6642	8014	6162	5646	5584	6068	7510	5740	173870	3300.67	378.494	4649.78	505.35	3915	614.698	3797.67	742.561	6522.33	793.013	6118.33	720.128
1.1.1.193	3732	3146	3024	4392	3656	4764	4726	5158	4148	5080	5162	4762	4916	3764	3182	3982	4214	3432	4036	3344	4106	5014	3320	2966	6140	5796	6042	6500	6642	8014	6162	5646	5584	6068	7510	5740	173870	3300.67	378.494	4649.78	505.35	3915	614.698	3797.67	742.561	6522.33	793.013	6118.33	720.128
2.6.1.85	3052	2884	2446	4584	4006	5064	4726	5008	4896	4826	5224	5190	5426	4190	3700	3870	4378	3826	3074	2724	3600	4176	2708	1980	5654	5598	5552	4810	5508	6538	7334	6542	6694	8082	9026	6606	173502	2794	312.864	4836	375.105	4231.67	636.808	3043.67	766.662	5610	550.823	7380.67	997.612
3.2.1.24	2752	2950	2418	2724	2336	2878	3128	3526	3636	2944	3258	3124	7500	5862	4564	6276	6230	3902	3230	3300	4024	4360	2454	1890	7480	6896	6858	9668	7794	10454	5792	5386	5608	6148	6134	5674	173158	2706.67	268.882	3061.56	400.076	5722.33	1296.09	3209.67	928.174	8191.67	1511.27	5790.33	302.092
1.17.1.8	3774	2962	2824	5330	4794	5442	5264	6164	4728	5834	6110	5792	4752	3582	3210	3784	3448	3592	3534	3100	3868	4244	3150	2790	6344	5830	6360	5810	6612	7598	5328	4880	4864	5434	6296	4938	172366	3186.67	513.304	5495.33	523.45	3728	536.33	3447.67	540.423	6425.67	656.343	5290	549.126
2.5.1.48	3656	3288	2812	3894	3516	4276	4266	4680	4564	4286	4476	4432	6106	4954	3884	4920	4242	3978	3834	3528	4438	5254	3412	3100	5168	5014	5234	4916	5894	6844	6808	6164	6126	6756	7134	5960	171814	3252	423.15	4265.56	359.381	4680.67	834.795	3927.67	792.345	5511.67	737.426	6491.33	470.378
4.1.2.48	4522	3570	3608	4358	3462	4720	4852	5198	4598	4842	5386	4778	6366	4618	3998	4676	4824	4022	3398	2956	3702	4134	2856	2194	6210	5848	5696	7024	6450	8432	5204	4770	4764	5366	5532	4854	171788	3900	539.003	4688.22	550.808	4750.67	864.328	3206.67	686.033	6610	1009.23	5081.67	331.207
7.2.2.21	2594	2936	2298	5090	4428	5660	5796	6190	6064	5840	6358	5536	7424	6030	4480	6354	6698	5082	2634	2524	3236	2864	1688	1492	5246	5148	4824	4816	4178	5854	4994	4902	4776	5910	6634	5132	171710	2609.33	319.276	5662.44	595.846	6011.33	1076.43	2406.33	680.513	5011	557.05	5391.33	728.896
7.2.2.12	2594	2936	2298	5090	4428	5660	5796	6190	6064	5840	6358	5536	7424	6030	4480	6354	6698	5082	2634	2524	3236	2864	1688	1492	5246	5148	4824	4816	4178	5854	4994	4902	4776	5910	6634	5132	171710	2609.33	319.276	5662.44	595.846	6011.33	1076.43	2406.33	680.513	5011	557.05	5391.33	728.896
1.3.1.98	4106	3332	3368	3690	3370	4158	4512	4672	4484	4562	4882	4574	5832	4256	3760	4400	4872	4032	3436	2910	3800	4592	3300	2614	6070	5670	6120	6486	6248	7950	6160	5420	5422	6220	6750	5582	171612	3602	436.848	4322.67	493.985	4525.33	740.934	3442	698.494	6424	793.693	5925.67	538.248
3.2.1.55	2498	2400	2326	5966	5342	7222	7156	8056	7956	7560	7804	8512	6140	3778	3298	4134	4558	4048	1804	1730	2102	1936	1530	1324	6616	6106	6226	8656	7614	9614	3000	2640	2848	2968	2994	2874	171336	2408	86.2786	7286	1026.57	4326	981.392	1737.67	279.564	7472	1425.58	2887.33	136.731
4.2.1.75	3190	3070	2720	4960	4390	5010	4884	5458	4740	5094	5392	5214	5320	4200	3604	4508	4382	4066	3286	2804	3612	4036	2862	2418	5378	4888	5378	5938	5746	7172	6266	5520	5584	6480	7550	5582	170702	2993.33	244.199	5015.78	329.901	4346.67	570.35	3169.67	592.132	5750	784.507	6163.67	790.078
7.3.2.7	3340	2536	2498	3970	3448	4146	4012	4334	4156	4076	4268	4082	5900	4152	3606	4062	3466	3372	3424	3146	4270	5244	2792	2028	6254	5822	6102	6342	6632	8042	6882	6154	6340	7374	8044	6118	170434	2791.33	475.539	4054.67	255.045	4093	940.195	3484	1134.2	6532.33	786.446	6818.67	771.451
5.4.2.10	4286	3244	3462	4264	3982	4888	4734	5360	4230	4970	5150	5038	5026	3862	3392	3868	3970	3828	3640	3028	4128	4634	3492	2934	5750	5608	5716	5774	5728	7644	5984	5228	5066	6090	6716	5428	170142	3664	549.585	4735.11	471.324	3991	545.675	3642.67	651.31	6036.67	789.5	5752	624.101
4.3.1.3	5466	3770	4138	3658	3202	4062	4052	4460	3896	4180	4182	4044	6630	5054	4750	5430	6322	4490	2850	2364	3022	3288	3038	2668	5234	4850	4794	7480	5772	7968	5754	5124	5260	5808	6992	5518	169570	4458	892.135	3970.67	360.979	5446	862.729	2871.67	323.504	6016.33	1376.77	5742.67	668.045
6.5.1.8	5148	4204	4330	4970	4590	5384	5266	5844	5410	6170	6292	5588	5896	5212	4584	4484	4648	4620	3688	3126	3634	3806	3344	3218	4938	4450	4564	5876	5088	6752	4134	3828	3738	4074	4206	3786	168890	4560.67	512.532	5501.56	546.298	4907.33	548.426	3469.33	277.499	5278	880.609	3961	200.383
3.1.31.1	3122	2160	2498	4516	3760	5104	4722	5470	4580	4834	5130	4758	5550	4170	3476	4040	3322	3380	3262	2792	3582	4126	2914	2106	6118	5616	5858	5412	5534	7376	6858	6122	5996	7000	7422	6086	168772	2593.33	488.034	4763.78	481.932	3989.67	842.736	3130.33	696.164	5985.67	726.166	6580.67	592.875
1.1.1.284	3350	2848	2810	6522	5844	6328	6392	6890	5418	6804	6360	6056	6300	4540	4108	4392	3170	4462	3298	2700	3454	4356	4022	3714	4682	4560	4734	3712	5012	5240	4360	3832	4082	4450	5574	4292	168668	3002.67	301.399	6290.44	462.172	4495.33	1017.56	3590.67	580.45	4656.67	524.386	4431.67	601.959
6.3.4.15	4426	3610	3498	4436	3498	4644	4596	5256	4544	4918	5196	4998	5378	4162	3534	4376	4544	3648	3478	2968	3558	4270	2866	2536	6152	5662	5942	6494	6020	7608	5404	4756	4770	5492	6360	4984	168582	3844.67	506.554	4676.22	529.053	4273.67	671.437	3279.33	619.494	6313	690.362	5294.33	607.911
5.3.1.23	4750	3702	3746	4272	3660	4518	4670	5252	4582	4906	5282	4378	5734	4554	3842	4460	4238	3924	3842	3026	3938	4100	3456	2938	6430	6064	6308	7234	6532	8610	4416	3938	4036	4438	4502	4214	168492	4066	592.77	4613.33	504.316	4458.67	685.625	3550	489.135	6863	941.608	4257.33	232.602
4.98.1.1	4564	3688	3798	3948	3484	4302	4206	4594	4164	4622	4524	4478	5788	4264	3920	4426	4432	3626	3594	3222	3768	5850	3474	2954	5656	5358	5612	4920	5698	6452	5992	5272	5362	6096	6874	5470	168452	4016.67	477.185	4258	366.265	4409.33	745.076	3810.33	1039.36	5616	501.641	5844.33	607.567
4.99.1.9	4564	3688	3798	3948	3484	4302	4206	4594	4164	4622	4524	4478	5788	4264	3920	4426	4432	3626	3594	3222	3768	5850	3474	2954	5656	5358	5612	4920	5698	6452	5992	5272	5362	6096	6874	5470	168452	4016.67	477.185	4258	366.265	4409.33	745.076	3810.33	1039.36	5616	501.641	5844.33	607.567
5.4.99.25	4264	3464	3460	4120	3498	4150	4558	4928	4442	4662	4946	4604	5788	4260	3624	4518	5104	3742	3664	3242	3516	4360	3358	2766	6152	5640	5780	6368	5732	7794	5346	4882	4930	5522	6078	4810	168072	3729.33	463.039	4434.22	455.227	4506	827.455	3484.33	527.402	6244.33	808.529	5261.33	489.783
1.17.1.5	4512	4004	4130	5128	4578	5434	5866	5650	5734	5918	6310	5990	6142	5942	4252	4668	3878	4446	4110	3680	4368	2884	2320	2098	5326	4718	4706	5610	4294	6924	3682	3844	3648	4074	4114	4120	167102	4215.33	264.532	5623.11	517.029	4888	932.93	3243.33	948.696	5263	941.226	3913.67	217.952
2.8.3.12	4408	3486	3736	6260	5666	7048	7336	7690	7468	8152	9050	7174	6378	5546	3860	4044	3402	4492	2804	2332	2988	1778	1974	1606	4672	4350	4436	3952	3784	5950	3558	3538	3230	3586	3738	3558	167030	3876.67	476.824	7316	987.336	4620.33	1127.59	2247	560.701	4524	770.478	3534.67	166.073
2.1.1.14	3406	2226	2652	10214	8882	10252	10080	12048	8260	11414	10684	10046	5420	4024	2980	2800	1904	3668	1940	1588	1926	2460	3056	3236	3040	3390	3610	2358	3438	3540	1930	1850	1796	2104	2658	2092	166972	2761.33	597.549	10208.9	1154.57	3466	1207.47	2367.67	666.66	3229.33	470.286	2071.67	313.191
3.6.1.45	5724	4334	4256	3114	2732	3662	3520	3864	4100	3294	3498	3082	6864	5458	4492	5292	5688	3988	3920	3608	4200	5210	3174	2604	5494	5076	4974	7272	5910	7622	5132	4430	4828	5156	5562	4820	165954	4771.33	825.955	3429.56	422.857	5297	999.582	3786	896.714	6058	1131.31	4988	385.649
1.1.1.179	3242	2790	2332	4442	3840	4766	4916	5676	5280	4758	5046	5078	5418	4156	3200	3666	3228	3292	3702	3298	4214	4778	2742	2144	6464	6458	6366	6318	6122	8158	5046	4824	4648	5182	5322	4650	165562	2788	455.003	4866.89	519.789	3826.67	860.651	3479.67	962.861	6647.67	750.354	4945.33	282.267
2.3.1.241	4840	3744	3780	3788	3354	4306	4296	5002	4304	4658	5054	4324	4918	3454	2964	3816	5042	3042	4172	3454	3742	3624	3502	2656	6842	6406	6456	7042	6066	7906	4674	4518	4540	4308	5888	5018	165500	4121.33	622.644	4342.89	539.749	3872.67	911.508	3525	497.238	6786.33	647.267	4824.33	571.451
2.4.1.346	2866	2106	2172	4186	3506	4230	4440	4864	4340	4726	4504	4060	5284	4042	3454	3488	3128	2884	3314	3112	4054	4384	2896	2526	6302	5848	6282	5606	5978	7534	6674	6198	5990	7040	7202	5990	165210	2381.33	421.029	4317.33	397.746	3713.33	862.955	3381	707.395	6258.33	678.571	6515.67	533.781
1.2.1.38	4282	3578	3496	4382	3800	4446	4570	5468	4374	4934	5250	4688	5496	4040	3330	4330	4310	3404	3738	3178	3954	4876	3226	2668	5482	5446	5878	5110	5754	6690	5214	4822	4850	5200	5880	4886	165030	3785.33	432.076	4656.89	503.651	4151.67	788.76	3606.67	769.266	5726.67	542.323	5142	401.595
5.4.99.15	2188	1988	1952	5570	4596	5772	5730	7072	5586	6902	6704	6340	4612	4180	3552	3464	2644	3732	3454	3006	3228	3390	2920	2110	5380	5278	5650	6036	5304	7554	4962	4518	4654	5078	5416	4356	164878	2042.67	127.143	6030.22	792.005	3697.33	671.694	3018	491.282	5867	874.377	4830.67	393.781
2.5.1.72	3270	3128	2668	4264	3660	4460	4358	4968	4160	4844	4830	4670	5266	3772	3298	4410	4488	3886	3310	2936	3472	3946	3348	2838	5738	5520	5792	6216	6026	7684	5592	5330	5290	5606	6460	5338	164842	3022	314.687	4468.22	413.027	4186.67	686.69	3308.33	398.705	6162.67	783.165	5602.67	442.109
6.6.1.2	3562	2606	3138	6674	5792	6224	6214	7560	5116	6124	5674	6220	6154	4228	3550	5086	4784	4752	3726	2820	3358	4540	4724	4188	3760	3500	3634	2874	4260	4316	3922	3738	3734	4564	4876	3858	163850	3102	479.016	6177.56	679.603	4759	871.467	3892.67	729.608	3724	532.885	4115.33	484.006
1.1.1.267	4112	3130	3074	4240	3684	4540	4598	4948	4268	4876	5072	4706	5322	3862	3150	3680	3978	3386	3388	2946	3640	3982	3072	2380	5624	5270	5300	6284	6000	7306	5762	5278	5356	5708	6596	5114	163632	3438.67	583.796	4548	431.487	3896.33	762.185	3234.67	563.304	5964	767.176	5635.67	533.237
2.7.1.33	4500	3436	3394	4476	3922	4692	4906	5434	4772	5022	5070	4894	5546	4092	3514	3958	4092	3526	3066	2716	3372	4090	2862	2300	5472	4830	5016	5662	5584	6940	5182	5120	5030	5510	6360	5034	163392	3776.67	626.777	4798.67	423.158	4121.33	745.835	3067.67	615.316	5584	741.418	5372.67	514.975
2.4.99.17	3962	3250	3078	4290	3908	4816	4900	5154	4878	4714	5192	4986	5974	4622	3848	4610	5296	3814	3310	2998	3602	4094	3126	2502	5996	5560	5528	6882	6102	7976	4010	3722	3844	4086	4706	3974	163310	3430	468.683	4759.78	415.108	4694	837.038	3272	543.198	6340.67	939.466	4057	343.143
2.7.1.71	3432	2968	2846	4476	3886	4926	5084	5252	5344	4796	5424	4862	5548	4388	3776	4120	4212	3642	2998	2814	3620	4084	2676	2296	5584	5106	5270	5448	4916	6870	5448	4862	5064	5644	6308	5064	163054	3082	309.186	4894.44	480.898	4281	679.819	3081.33	656.499	5532.33	697.077	5398.33	529.438
3.5.2.2	4526	3646	3648	5446	5026	5684	5636	6632	5498	6148	6450	5856	6540	4884	3924	4476	3486	4124	3352	2858	3650	3948	3724	3530	4680	4124	4546	4922	4840	6316	3548	3234	3358	3424	3714	3346	162744	3940	507.492	5819.56	511.306	4572.33	1075.14	3510.33	376.22	4904.67	746.311	3437.33	170.264
1.1.1.65	3096	2302	2550	4710	4200	5532	5372	6054	5158	5676	6246	5582	4166	3340	2488	2764	2278	3150	3124	2608	3358	3732	2550	2258	6042	5730	5900	6620	5754	7978	5788	5044	4986	5712	5974	4872	162694	2649.33	406.213	5392.22	636.893	3031	682.79	2938.33	559.156	6337.33	867.099	5396	480.455
2.5.1.32	3176	2606	2550	3772	2972	4040	3968	4590	3978	3834	4448	4128	5760	4130	3258	4462	4460	3770	3182	2802	3730	4864	2694	2328	6234	5866	5944	5542	6048	7410	6174	5574	5662	6414	6668	5618	162656	2777.33	346.389	3970	460.505	4306.67	846.019	3266.67	916.327	6174	647.203	6018.33	466.374
2.5.1.90	4252	3458	3436	4304	3728	4146	4278	4898	4448	4568	4946	4612	5766	4326	3404	4336	4890	3726	3426	3026	3544	3628	3090	2644	5798	5368	5578	5926	5742	7360	5240	4344	4650	5114	5398	4776	162174	3715.33	464.897	4436.44	379.117	4408	843.983	3226.33	374.152	5962	711.518	4920.33	398.48
7.1.2.1	772	792	706	5726	4692	5828	5962	6974	6456	6064	6768	6262	2560	2494	1730	2242	1828	2680	3184	3024	2864	2814	3128	2046	8898	8304	8242	9066	7536	11498	3378	3326	3148	3636	3572	3472	161672	756.667	45.0037	6081.33	668.637	2255.67	397.213	2843.33	416.355	8924	1372.76	3422	177.214
3.4.23.43	4490	3130	3216	4714	3864	4346	4788	5764	4364	4886	5266	4770	5838	4456	3404	4294	4016	3502	3098	2834	3416	4146	2918	2558	5304	5062	5086	5548	5402	7134	4940	4492	4496	5200	5882	4748	161372	3612	761.585	4751.33	549.236	4251.67	882.732	3161.67	560.143	5589.33	779.184	4959.67	526.754
6.3.4.21	4228	2802	3224	4882	4272	4786	5366	5560	4850	5234	5316	5160	6262	4648	3726	4798	4722	4322	3302	2616	3328	3632	3242	2508	4060	4022	4070	4824	4476	5850	5050	4792	4516	5192	6598	4900	161136	3418	732.527	5047.33	390.482	4746.33	840.395	3104.67	442.847	4550.33	709.906	5174.67	734.498
1.17.99.9	4786	3536	3758	4592	4096	4666	4610	5296	4036	4814	5072	5070	6090	4170	3610	4182	4030	3742	3092	2792	3290	4744	3356	2644	5056	4860	5054	4168	5092	5530	5550	5000	4890	5358	5470	5022	161124	4026.67	666.904	4694.67	428.642	4304	905.007	3319.67	750.695	4960	446.686	5215	278.136
1.17.7.4	3916	3190	3194	4774	3920	4696	4866	5476	4578	5030	4970	4806	5254	3592	3088	3534	3436	3254	3404	2888	3356	4018	3390	2584	4906	4620	5088	5406	5586	6662	5806	4952	5108	5930	6338	5368	160984	3433.33	418.006	4790.67	414.964	3693	787.019	3273.33	493.094	5378	717.517	5583.67	531.069
2.1.1.182	4318	3046	3222	3966	3408	4258	4008	4734	3878	4418	4576	4178	5010	3972	3268	4464	4858	3604	3198	2844	3516	4084	3052	2628	5788	5236	5638	6320	5586	7698	5430	5052	4956	5464	6024	4980	160680	3528.67	689.224	4158.22	400.744	4196	697.78	3220.33	520.511	6044.33	883.73	5317.67	411.908
2.5.1.74	4220	3184	3560	3648	3454	4284	4444	4348	4566	4184	4442	4160	5426	4542	3700	4150	4270	3734	3508	3040	4054	3784	2716	2340	5542	5266	5220	6360	5462	7298	5544	4958	4740	5506	5892	5078	160624	3654.67	524.448	4170	376.828	4303.67	637.199	3240.33	656.495	5858	817.286	5286.33	431.547
6.3.2.29	3504	3116	2600	3992	3122	3546	3752	4510	3400	3660	3906	3784	5324	3812	3302	4534	4840	3208	3298	2686	3304	5366	3688	3560	5360	4900	4984	4510	5492	6104	7174	6348	6478	6564	6766	5970	160464	3073.33	453.508	3741.33	391.724	4170	862.571	3650.33	908.528	5225	554.452	6550	404.627
6.3.2.30	3504	3116	2600	3992	3122	3546	3752	4510	3400	3660	3906	3784	5324	3812	3302	4534	4840	3208	3298	2686	3304	5366	3688	3560	5360	4900	4984	4510	5492	6104	7174	6348	6478	6564	6766	5970	160464	3073.33	453.508	3741.33	391.724	4170	862.571	3650.33	908.528	5225	554.452	6550	404.627
4.2.1.47	3792	2860	3020	4544	4072	4646	4934	5496	4816	4922	5308	5048	5984	4550	3746	4598	4642	3968	3078	2798	3100	3928	2946	2358	5370	5030	5266	5636	5280	6610	4640	4222	4364	4914	5258	4704	160448	3224	498.365	4865.11	421.035	4581.33	780.56	3034.67	514.964	5532	563.1	4683.67	374.314
3.1.1.2	4734	3608	3560	4634	4176	4966	5508	6248	5148	5598	6000	5468	5056	3598	3022	3842	4386	3346	2998	2534	2980	3782	3038	2414	5290	5182	5310	5938	5616	7282	4150	3938	3910	4108	4558	4252	160178	3967.33	664.386	5305.11	650.995	3875	740.426	2957.67	482.322	5769.67	790.674	4152.67	237.122
2.7.1.15	4226	3078	3304	4334	3816	4898	4810	5470	5050	5006	5636	5066	5864	4460	3680	3950	3328	3488	3064	2754	3484	4136	2304	2144	5878	5910	5646	4926	5240	6788	4684	4078	4244	4776	5712	4360	159592	3536	608.148	4898.44	551.292	4128.33	938.713	2981	748.913	5731.33	642.998	4642.33	586.625
5.1.2.1	3788	3312	3012	3854	3516	4602	4866	5054	5504	5204	5568	4980	5080	4584	3482	4108	4062	3882	3736	3218	4050	3044	2264	1844	6672	6394	6388	6634	5554	8588	3686	3722	3490	3872	3952	3932	159498	3370.67	391.312	4794.22	701.107	4199.67	559.645	3026	844.705	6705	1007.36	3775.67	177.392
1.18.1.3	3540	2840	2566	4702	4354	5370	5244	5862	5230	5212	5492	5362	6040	4210	3260	4302	3730	4120	2720	2386	3286	3848	2414	2220	3894	3922	4186	3416	4130	4856	5670	5184	5556	6494	7386	5464	158468	2982	502.287	5203.11	439.498	4277	945.667	2812.33	631.946	4067.33	472.315	5959	826.333
3.4.21.83	5344	4210	4284	4024	3418	3856	3946	4728	3810	3982	4010	4068	6614	4502	4236	5262	5258	4276	2828	2558	3074	4628	3010	2338	4418	4174	4398	4202	5152	5436	5620	4986	5018	5638	5922	5028	158256	4612.67	634.433	3982.44	341.195	5024.67	904.702	3072.67	810.86	4630	531.415	5368.67	406.778
3.5.2.10	4176	3060	3438	4928	4310	5148	5192	6092	4996	5244	5660	4838	5974	4850	4096	3850	3590	3640	3670	3088	3568	3932	3200	2716	5182	4778	4858	6128	5618	6994	3456	3284	3298	3686	4026	3616	158180	3558	567.595	5156.44	504.187	4333.33	925.411	3362.33	442.908	5593	851.237	3561	279.928
2.1.1.228	3796	3256	3116	4018	3370	4266	4058	4738	4066	4262	4470	4154	5070	3890	3236	4442	4720	3744	3830	2922	3762	4124	3122	2448	5578	5346	5634	6076	5704	7904	4838	4524	4588	5010	5540	4350	157972	3389.33	359.073	4155.78	373.364	4183.67	680.822	3368	639.695	6040.33	943.25	4808.33	428.1
2.3.1.35	3194	2790	2572	4226	3644	4388	4562	4890	4432	4868	4756	4748	4814	3802	3302	3560	3380	3428	3184	2922	3354	3972	2894	2432	5626	5566	5800	5156	5572	6450	5566	5172	5268	5682	6858	5114	157944	2852	315.601	4501.56	394.234	3714.33	566.49	3126.33	519.257	5695	426.169	5610	651.068
1.1.1.425	3438	2708	2698	5016	4174	5416	5636	6342	5582	5766	5862	5892	7096	5070	4096	4028	3660	3442	3246	2852	3494	3904	2530	2084	4804	4654	4862	5008	4860	6096	3894	3732	3624	4150	4206	3940	157862	2948	424.382	5520.67	621.027	4565.33	1360.11	3018.33	663.568	5047.33	526.234	3924.33	227.429
3.6.1.13	4528	3374	3628	3966	3196	4318	4400	4804	4508	4400	4964	4274	5492	4380	3260	3974	3706	3292	3370	2854	3296	3738	2820	2460	6282	5642	5650	5872	5074	7294	4936	4508	4422	4732	5376	4686	157476	3843.33	606.387	4314.44	510.841	4017.33	837.214	3089.67	461.787	5969	757.987	4776.67	344.318
2.3.1.275	4266	3232	3314	3346	2940	3760	3660	3972	3808	3772	4214	3718	5736	4384	3706	3962	3988	3066	3446	2934	3652	4040	2630	2084	5872	5750	5686	6084	5628	7840	5776	5216	4982	5672	6146	5190	157472	3604	574.773	3687.78	364.37	4140.33	894.804	3131	718.744	6143.33	846.788	5497	440.023
3.5.1.88	4146	3380	3382	3590	3288	3666	3948	4422	3504	4294	4450	4158	5074	3866	3318	4128	4452	3406	3402	2826	3596	4418	2942	2524	5012	4852	5198	5844	5392	7056	5500	5068	5266	5922	6690	5230	157210	3636	441.674	3924.44	429.524	4040.67	663.349	3284.67	678.461	5559	809.877	5612.67	605.36
2.7.2.11	3450	3094	2692	4360	3442	4292	4454	5194	4214	4304	4560	4652	5036	3902	3262	4024	3660	3640	3334	2712	3462	4514	3160	2694	5386	5224	5450	4918	5632	6622	5340	4934	5028	5356	6036	5106	157140	3078.67	379.233	4385.78	460.363	3920.67	605.897	3312.67	668.253	5538.67	582.706	5300	397.997
3.1.4.4	1390	1270	1200	4830	4370	5276	5368	5972	4816	5872	5976	5118	4416	3990	3170	4016	3848	3614	4138	3320	4122	4002	3916	3036	6330	5824	6296	5942	5958	7596	3952	3514	3634	3712	3722	3576	157102	1286.67	96.0902	5288.67	569.316	3842.33	420.775	3755.67	463.571	6324.33	655.543	3685	153.042
1.8.4.12	3740	2814	3312	4192	3588	4236	4340	5138	4512	4696	5016	4402	4464	3456	2698	3788	3986	3140	3544	2918	3636	3718	2882	2552	6170	5738	6094	6766	6148	8330	4434	4046	4264	4778	5216	4202	156954	3288.67	463.441	4457.78	464.667	3588.67	628.65	3208.33	485.158	6541	936.787	4490	434.583
1.1.99.28	4602	3562	3740	3518	2858	3500	3606	4588	3742	4256	4442	3968	6732	5162	4076	4568	5310	3554	2864	2640	3458	3602	2386	2060	5282	4798	4964	6962	6732	7616	4778	4264	4440	4642	4774	4764	156810	3968	556.227	3830.89	542.974	4900.33	1113	2835	602.911	6059	1190.42	4610.33	213.764
6.2.1.17	4240	3386	3304	3836	3608	3988	3820	4278	4008	3816	3984	3864	5462	3922	3328	4304	4052	3474	3322	2974	3490	4214	3910	3380	5076	4814	5258	4526	5146	5694	5890	5028	5466	6270	6206	5396	156734	3643.33	518.353	3911.33	184.494	4090.33	763.93	3548.33	444.239	5085.67	397.626	5709.33	493.005
2.7.4.3	4268	3334	3536	3882	3424	4130	4062	4634	4044	4228	4656	4352	5602	4214	3468	4334	4942	3656	3392	2598	3436	4230	2904	2550	5790	5444	5636	5862	5758	7154	4544	4232	4322	4924	4876	4196	156614	3712.67	491.424	4156.89	379.973	4369.33	799.254	3185	636.338	5940.67	612.198	4515.67	321.726
5.3.1.6	3860	2498	3034	4422	3874	4524	4528	5446	4670	4926	5198	4866	5326	4158	3394	3998	3992	3622	3326	2822	3228	3826	2814	2350	5298	4954	5318	5668	5264	7404	4750	4292	4256	5072	5164	4412	156554	3130.67	686.126	4717.11	461.186	4081.67	671.329	3061	511.271	5651	888.186	4657.67	397.988
5.3.1.16	4150	3288	3322	4056	3368	4178	4058	4702	4056	4496	4462	4426	5506	4110	3612	4512	4242	3646	3096	2750	3492	4062	2996	2592	5184	4808	4962	5644	5346	6990	5052	4696	4496	5316	5800	4786	156258	3586.67	488.157	4200.22	389.5	4271.33	697.85	3164.67	537.664	5489	791.453	5024.33	475.654
2.4.1.342	2744	2352	2124	4266	3710	5134	4854	5444	4984	4718	5252	4968	5268	4048	3176	4142	3744	3492	3064	2528	3474	3768	2448	1742	5420	4926	4976	4832	4646	6178	5756	5096	5248	5916	6402	5242	156082	2406.67	313.594	4814.44	533.115	3978.33	725.266	2837.33	744.296	5163	559.332	5610	504.555
2.7.1.24	3568	2814	2934	3978	3602	4316	4522	4778	4618	4490	4560	4602	5412	3774	3252	4364	4222	3638	3214	2710	3424	3936	2814	2240	5580	5170	5458	5926	5570	7426	5072	4384	4574	4852	5606	4610	156010	3105.33	405.149	4385.11	370.767	4110.33	754.203	3056.33	596.477	5855	807.065	4849.67	440.853
1.12.1.5	2842	2662	1946	3390	2954	3710	3748	4066	3750	3720	3774	3734	5410	4638	3778	3342	3144	3104	3340	3024	4042	4166	2472	1902	4880	4686	4940	4506	4814	5838	7454	6698	6702	7660	8012	6668	155516	2483.33	473.968	3649.56	311.369	3902.67	933.392	3157.67	882.806	4944	464.469	7199	586.257
1.5.5.1	4834	3594	3704	4388	4006	4568	4522	5306	4080	4574	4756	4512	5106	3846	3098	3916	3730	3278	3432	2490	3018	4170	3962	3510	4968	4490	4794	4612	4888	6090	4696	4336	4398	4736	5822	4822	155052	4044	686.367	4523.56	379.784	3829	705.174	3430.33	614.877	4973.67	574.558	4801.67	536.053
2.1.1.198	4618	3388	3552	3780	3188	3690	3816	4182	4024	3840	4060	3956	5186	3796	3214	4458	5006	3468	3182	2922	3486	4006	2760	2252	5422	5008	5256	6232	5572	7658	4832	4516	4484	5150	6062	4628	154650	3852.67	667.851	3837.33	288.182	4188	819.606	3101.33	607.113	5858	973.311	4945.33	599.922
2.7.4.9	3848	3012	3114	4554	3820	4576	4324	5304	4344	4890	4786	4516	5304	3932	3454	4052	3824	3596	2940	2588	3172	4076	2742	2356	5066	4742	4822	5552	5388	6672	4848	4406	4458	5148	5422	4766	154414	3324.67	456.08	4568.22	413.08	4027	662.673	2979	606.524	5373.67	709.32	4841.33	393.293
2.4.99.12	4292	3178	3312	3908	3444	4038	4408	4976	4312	4360	4606	4362	4380	3356	2976	3480	4416	3036	3726	2846	3274	3866	3184	2636	5902	5498	5754	7544	6294	8704	3882	3658	3544	3928	4766	3954	153800	3594	608.187	4268.22	435.29	3607.33	641.146	3255.33	479.793	6616	1251.19	3955.33	429.164
2.4.99.14	4292	3178	3312	3908	3444	4038	4408	4976	4312	4360	4606	4362	4380	3356	2976	3480	4416	3036	3726	2846	3274	3866	3184	2636	5902	5498	5754	7544	6294	8704	3882	3658	3544	3928	4766	3954	153800	3594	608.187	4268.22	435.29	3607.33	641.146	3255.33	479.793	6616	1251.19	3955.33	429.164
2.4.99.13	4292	3178	3312	3908	3444	4038	4408	4976	4312	4360	4606	4362	4380	3356	2976	3480	4416	3036	3726	2846	3274	3866	3184	2636	5902	5498	5754	7544	6294	8704	3882	3658	3544	3928	4766	3954	153800	3594	608.187	4268.22	435.29	3607.33	641.146	3255.33	479.793	6616	1251.19	3955.33	429.164
2.4.99.15	4292	3178	3312	3908	3444	4038	4408	4976	4312	4360	4606	4362	4380	3356	2976	3480	4416	3036	3726	2846	3274	3866	3184	2636	5902	5498	5754	7544	6294	8704	3882	3658	3544	3928	4766	3954	153800	3594	608.187	4268.22	435.29	3607.33	641.146	3255.33	479.793	6616	1251.19	3955.33	429.164
2.3.1.57	4670	3110	3552	3364	3028	3890	3730	3990	4294	3632	3698	4038	6374	4950	3846	4878	5002	3990	2746	2520	3230	3590	2154	1622	4672	4166	4294	4674	4294	6182	6032	5364	5400	6286	7016	5408	153686	3777.33	804.041	3740.44	377.916	4840	905.923	2643.67	713.957	4713.67	749.865	5917.67	661.719
1.5.1.2	3692	3050	2756	3680	3194	4060	4122	4372	3864	4234	4340	4274	5266	3924	3256	4142	4178	3350	3258	2924	3622	4110	2938	2310	5466	5050	5108	5130	5336	7014	5332	4656	4780	5362	6092	5036	153278	3166	478.661	4015.56	382.533	4019.33	725.834	3193.67	623.895	5517.33	749.868	5209.67	517.301
5.5.1.4	3780	2956	3146	4744	4004	4918	4906	5426	4794	5128	5446	4824	4926	3744	3176	3400	2802	3564	3102	2710	3106	3750	3120	2494	4664	4004	4340	4622	4494	6004	5290	4578	4752	5598	6054	4794	153160	3294	431.477	4910	428.719	3602	726.204	3047	430.214	4688	687.515	5177.67	573.629
2.4.2.8	4354	3280	3458	4124	3630	4372	4280	4612	4436	4844	4846	4510	5352	4200	3388	3840	3932	3336	2826	2654	3282	3472	2376	1930	5482	4996	5066	5326	4782	6510	4882	4326	4586	5060	6000	4734	153084	3697.33	575.612	4406	377.215	4008	736.639	2756.67	571.193	5360.33	615.07	4931.33	580.631
3.1.1.1	2430	2224	1978	2658	2408	3056	3232	3112	3900	2978	3304	2954	6390	4444	3758	4162	3846	2958	3652	3376	3964	4054	2310	1816	7088	6826	7142	5734	5986	7742	5644	5302	5134	6048	6210	5162	152982	2210.67	226.295	3066.89	418.581	4259.67	1157.49	3195.33	922.574	6753	758.109	5583.33	462.791
2.7.2.8	4022	3110	3058	4058	3530	4148	4112	4770	3994	4238	4304	4230	5200	4100	3640	3780	3886	3642	3218	2866	3630	4280	3110	2628	5070	4798	4864	4682	4962	5764	5374	4620	4856	5256	5994	4776	152570	3396.67	542.178	4153.78	324.187	4041.33	593.112	3288.67	591.827	5023.33	386.574	5146	506.135
5.3.1.1	3798	2930	2968	3968	3400	4086	4302	4662	4122	4180	4518	4094	4876	3756	3126	4106	4108	3576	3130	2834	3360	4178	2816	2532	5212	4888	4874	5708	5260	7058	4924	4656	4612	5172	5900	4800	152490	3232	490.538	4148	357.976	3924.67	593.197	3141.67	582.1	5500	821.899	5010.67	480.324
2.5.1.61	3524	3182	2874	3686	3520	4190	4088	4690	3854	4146	4276	4064	4680	3470	3062	4002	3750	3564	3556	3056	3808	4468	2934	2636	5254	4846	5074	5210	5538	6618	5270	4484	4538	5182	5908	4708	151710	3193.33	325.148	4057.11	343.236	3754.67	550.384	3409.67	670.828	5423.33	627.68	5015	546.645
2.4.2.17	3490	3080	2940	3822	3442	4024	3976	4500	4032	4108	4172	3882	4918	4030	3114	4140	3938	3654	3110	2796	3388	3986	3002	2504	5018	4912	5162	5456	5180	6664	5362	4638	4980	5310	5858	5030	151618	3170	285.832	3995.33	285.088	3965.67	594.089	3131	513.714	5398.67	646.519	5196.33	415.782
2.5.1.31	4166	3116	3116	3932	3680	4452	4372	5008	4014	4378	4838	4572	5330	4280	3516	4304	4594	3702	3130	2764	3244	3734	3088	2406	5024	4518	4892	5636	5278	6394	4310	3938	3958	4556	5194	4182	151616	3466	606.218	4360.67	428.305	4287.67	651.014	3061	449.253	5290.33	657.848	4356.33	470.694
3.4.17.11	3054	2426	2558	3840	3182	3952	4304	4532	4286	4082	4364	3976	5482	4040	3244	3350	3090	2744	3732	3056	4052	4920	2950	2672	6628	6370	6340	5524	6168	7462	4286	4094	3832	4330	4522	4136	151580	2679.33	331.115	4057.56	397.531	3658.33	989.665	3563.67	840.931	6415.33	633.106	4200	236.108
5.4.99.5	3364	2938	2746	3558	3006	3762	3674	3942	3668	3588	4032	3628	5192	4020	3562	4296	5416	3582	3238	2790	3446	3986	3006	2966	5596	5158	5316	6328	6224	7648	4632	4190	4372	4430	4978	4306	150584	3016	316.297	3650.89	289.861	4344.67	795.956	3238.67	431.573	6045	916.684	4484.67	282.672
2.6.1.113	4906	3606	3268	3846	3564	4210	4250	4616	3950	4256	4014	4166	5866	4350	3400	3960	3470	3316	2942	2412	3538	3908	3608	3234	4034	4092	4414	3386	4460	4600	5540	5198	5246	5714	6074	5142	150556	3926.67	864.801	4096.89	298.155	4060.33	968.811	3273.67	536.298	4164.33	439.904	5485.67	363.187
3.4.21.88	3718	2736	3092	3918	3346	4120	4096	4690	3846	3948	4442	4110	4448	3560	3160	3580	3706	3374	3112	2770	3076	3668	2990	2476	5714	5372	5556	5496	5282	7140	5406	4716	4596	5110	5370	4794	150534	3182	497.148	4057.33	377.236	3638	440.08	3015.33	397.671	5760	692.366	4998.67	346.449
4.4.1.13	3266	2742	2600	4698	4222	4984	5024	5468	4934	4822	4960	4772	4712	3592	2928	3984	4180	3606	3000	2526	3128	3644	2884	2288	5052	5140	5146	5288	4682	6212	4286	3870	3706	4440	5374	4104	150264	2869.33	350.784	4876	329.314	3833.67	607.369	2911.67	475.264	5253.33	512.165	4296.67	591.499
1.3.98.6	3162	2730	2590	3902	3410	4584	4942	5304	5080	4922	5566	4868	4922	4490	3228	3952	4006	4168	3234	2662	3158	2606	2138	1614	4894	4394	4438	6982	4704	7494	4424	4118	3840	4622	4724	4162	150034	2827.33	298.163	4730.89	680.167	4127.67	569.024	2568.67	615.946	5484.33	1380.06	4315	335.039
3.5.3.11	3534	2800	2788	3876	3244	3560	3620	4354	3576	3420	3940	3572	4084	3140	2718	3136	3118	2560	5016	4114	5040	6516	4446	3978	5584	5436	5442	5636	5808	6874	4012	3932	3818	4484	4754	4016	149946	3040.67	427.281	3684.67	327.542	3126	530.084	4851.67	927.846	5796.67	545.47	4169.33	365.753
3.5.1.46	2260	1878	1792	5092	4220	5228	5446	5898	5602	5156	5736	5456	4238	3322	2304	2682	2294	2484	3022	2768	3298	3656	2902	2838	5976	5364	5802	4928	4914	6334	4534	4338	4280	4654	4974	4246	149916	1976.67	249.113	5314.89	489.661	2887.33	762.941	3080.67	337.714	5553	580.613	4504.33	278.781
2.7.2.1	2338	2128	1932	3330	2860	3622	3648	4202	4016	3678	3908	4060	4964	3778	3094	4048	4384	3744	3106	2754	3318	3886	2462	1918	6106	5698	6094	6538	5758	8088	5120	4708	4558	5330	5848	4694	149718	2132.67	203.04	3702.67	414.794	4002	634.774	2907.33	687.971	6380.33	888.944	5043	491.034
2.5.1.17	3850	2890	3180	3920	3368	4266	4074	4736	4178	4268	4610	4356	4618	3538	3154	3678	3672	3058	3468	3184	3554	3850	3330	2698	5384	5074	5214	5312	5082	7024	4518	4160	4100	4622	4982	4280	149250	3306.67	492.375	4197.33	399.317	3619.67	555.301	3347.33	389.502	5515	749.403	4443.67	332.413
2.3.1.30	4156	3076	3112	3942	3450	4210	4350	5280	4184	4378	4816	4600	5092	3746	3380	4600	4434	3822	2964	2438	2766	3428	2496	1930	4558	4304	4450	5034	4520	6064	4952	4518	4600	5046	5934	4522	149152	3448	613.41	4356.67	520.644	4179	637.052	2670.33	510.277	4821.67	656.523	4928.67	541.674
5.3.1.24	3344	2440	2548	4078	3400	4102	4136	5006	4082	4306	4510	4312	4412	3294	2872	3496	3414	2944	3116	2862	3380	3744	2734	2196	5524	5218	5672	5834	5756	7318	4884	4448	4286	4982	5820	4418	148888	2777.33	493.71	4214.67	425.748	3405.33	553.415	3005.33	538.04	5887	733.933	4806.33	568.219
5.4.99.12	3908	3058	2888	3504	3074	3854	3804	4168	3698	3896	4282	3934	4858	3776	3008	4160	4674	3516	2906	2498	3248	3862	2500	2216	5022	4498	4978	5694	5544	6720	5034	4688	4676	5220	5750	4752	147866	3284.67	546.474	3801.56	357.583	3998.67	704.915	2871.67	605.182	5409.33	772.479	5020	417.967
3.4.11.19	4988	3434	3756	3954	3352	3670	4192	4472	3864	4206	4312	4132	6362	4590	3534	4514	3874	3754	2140	2008	2580	2728	2530	1880	4286	3896	4100	4768	4700	5814	5396	4946	4676	5560	5896	4792	147656	4059.33	820.206	4017.11	347.065	4438	1032.84	2311	346.705	4594	686.442	5211	481.095
2.4.1.347	3078	2442	2474	4508	3746	4524	4850	5306	4154	4668	4852	4592	5500	3976	2948	3636	2836	3398	2738	2520	3446	3912	2902	2268	4404	4360	4582	3488	4034	5084	5396	4904	5118	5772	6230	4840	147486	2664.67	358.315	4577.78	442.6	3715.67	971.803	2964.33	611.146	4325.33	535.695	5376.67	540.957
5.1.3.1	4200	2844	3136	3724	3332	4002	3938	4712	3892	4500	4614	4188	4608	3508	3154	3698	3902	3388	2886	2606	3074	3744	2760	2238	5200	4836	5152	5758	5194	6874	4574	4266	4198	4982	5522	4268	147472	3393.33	713.687	4100.22	449.555	3709.67	509.32	2884.67	507.085	5502.33	734.853	4635	523.969
3.1.1.53	2976	4088	2486	3794	3082	4000	4108	5386	4148	3970	4262	4290	5292	3704	2972	3136	3586	2670	3488	3232	4248	3060	3484	2652	5568	5674	5492	6760	6970	8158	3466	3232	3368	3304	3318	3330	146754	3183.33	820.878	4115.56	599.29	3560	931.542	3360.67	534.406	6437	1056.47	3336.33	77.6187
6.3.2.1	3572	2878	2812	3654	3002	3934	3884	4418	4142	3972	4270	3876	4790	3282	2876	3646	3962	3298	3012	2678	3192	4256	2712	2170	5212	4928	4970	5670	5228	6780	5066	4658	4356	5134	5824	4514	146628	3087.33	421.029	3905.78	408.898	3642.33	671.567	3003.33	705.692	5464.67	696.394	4925.33	535.861
2.7.4.25	3430	2404	2620	3190	2732	3626	3938	4302	3750	3918	4226	3954	4584	3432	2946	3470	3946	2968	3420	2924	3386	3842	2994	2534	5950	5644	5680	6428	5640	7976	4444	4040	4230	4364	5390	4118	146440	2818	540.899	3737.33	500.04	3557.67	624.417	3183.33	459.491	6219.67	912.083	4431	493.07
2.1.1.197	3192	2824	2544	3976	3852	4538	4484	4960	4432	4698	5044	4658	4552	3504	2738	3274	2990	2942	2884	2536	3464	3704	2818	2174	5192	5228	5476	4564	5138	5946	4710	4006	4360	4700	5870	4394	146366	2853.33	324.994	4515.78	398.476	3333.33	654.712	2930	570.204	5257.33	452.141	4673.33	641.187
5.1.1.7	3856	2924	2980	3532	3046	3626	3776	4160	3614	4046	4242	3796	4630	3360	2796	3552	3910	3198	3398	2630	3560	4060	2842	2252	4918	5156	5116	5522	5320	6470	5106	4532	4592	5086	5528	4536	145668	3253.33	522.675	3759.78	366.866	3574.33	635.763	3123.67	667.115	5417	554.431	4896.67	408.444
4.1.1.23	3688	2774	2854	3354	3046	3834	3784	4458	3914	4082	4232	3954	5308	3874	3076	4154	4334	3414	3166	2704	3340	4030	2936	2436	5142	4852	4848	5612	5056	6894	4448	3990	4096	4588	4892	4122	145286	3105.33	506.187	3850.89	430.314	4026.67	781.654	3102	557.035	5400.67	783.184	4356	348.108
2.3.1.47	3230	2370	2658	4242	3494	4202	4082	4862	3982	4206	4702	4304	4966	4134	3422	4064	3812	3254	3060	2518	3086	3746	2542	2074	4578	4174	4394	5478	4770	6220	4696	4392	4342	4592	5514	4818	144980	2752.67	437.746	4230.67	395.962	3942	610.077	2837.67	584.63	4935.67	771.044	4725.67	425.975
1.1.1.30	3408	2668	2666	4556	3936	4574	4620	5430	4010	4616	4614	4266	5950	4272	3400	3908	3830	3184	2816	2590	3092	3938	3494	3056	4760	4412	4684	4264	5352	6142	3898	3526	3610	3960	4082	3394	144978	2914	427.818	4513.56	436.701	4090.67	988.977	3164.33	484.851	4935.67	699.733	3745	272.98
2.7.7.85	3352	2616	2716	3836	3292	4164	4150	4724	4172	4536	4820	4258	4576	3934	3260	3580	3598	3394	3752	3280	3670	3268	2714	2112	5000	4536	4656	6032	4956	7178	4156	3790	3834	4212	4700	4058	144882	2894.67	399.206	4216.89	465.592	3723.67	475.565	3132.67	621.187	5393	1021.53	4125	328.801
3.1.4.16	3778	3048	2990	4064	3796	4160	4310	5082	4596	5090	5262	4934	5810	4612	3844	4716	5128	3980	2460	2174	2330	3458	2228	1778	4064	3466	3754	6198	4292	6642	3486	3170	3234	3560	4734	3586	143814	3272	439.167	4588.22	528.252	4681.67	731.082	2404.67	564.85	4736	1341.36	3628.33	568.293
2.7.9.3	3874	2834	2974	3850	3196	3922	4380	4844	4304	4692	4880	4298	5022	3932	3354	3486	3912	3194	3012	2756	3114	3524	2558	2142	5420	5026	5240	6244	5534	7190	3646	3368	3192	3660	3736	3318	143628	3227.33	564.388	4262.89	541.321	3816.67	661.261	2851	478.659	5775.67	806.662	3486.67	222.242
2.8.4.5	3096	2660	2824	3738	3266	4036	4094	4812	4560	4402	5048	4090	4700	3662	3140	3992	4566	3568	3348	2658	2878	2880	2532	2152	5618	4998	5200	7102	5494	8208	3366	3154	3122	3534	3588	3504	143590	2860	220.218	4227.33	546.964	3938	604.62	2741.33	401.006	6103.33	1270.56	3378	200.084
5.1.1.20	3104	2654	2808	3946	3522	4110	4300	4844	4380	4410	4780	4220	4758	3650	2826	3600	3778	3148	3806	2940	3440	3364	3038	2214	5550	5298	5208	6338	5410	7780	3512	3292	3102	3318	3550	3354	143352	2855.33	228.704	4279.11	405.279	3626.67	659.433	3133.67	546.145	5930.67	992.418	3354.67	162.494
1.4.1.4	3880	3166	3396	3004	2226	3016	3166	3266	3340	3424	3694	3366	3944	3542	2972	4318	6094	3348	3102	2614	2924	3494	3174	2982	5388	5008	4942	8570	6168	8452	3626	3468	3448	3880	4650	3764	142816	3480.67	364.452	3166.89	412.001	4036.33	1111.11	3048.33	291.82	6421.33	1676.8	3806	445.956
3.2.1.8	2176	2210	1932	3654	3268	4408	4230	4818	4402	3996	4526	4280	4808	3644	2890	3284	3790	3030	2056	1962	2600	2984	1886	1592	6628	6166	6334	8460	7608	9396	3378	3164	3058	3406	3326	3436	142786	2106	151.644	4175.78	472.049	3574.33	696.018	2180	513.4	7432	1296.14	3294.67	150.586
5.4.99.22	4010	3034	2862	3514	3104	3762	3730	4418	3738	4080	4098	4016	5220	3964	3412	3952	4346	3480	2700	2426	2894	3460	2386	1980	5014	4558	4616	5438	5160	6586	4472	4108	4160	4678	5136	4262	142774	3302	619.148	3828.89	381.555	4062.33	664.01	2641	507.232	5228.67	743.253	4469.33	389.16
2.7.1.202	1440	1680	1264	3022	2770	3714	3314	3766	4398	3610	3906	4064	4518	3722	2816	3174	2724	2786	2632	2612	3308	3570	2184	1754	7468	6918	6846	5926	5562	7534	4988	4646	4488	5300	5698	4586	142708	1461.33	208.819	3618.22	510.904	3290	708.112	2676.67	677.767	6709	805.96	4951	473.666
7.6.2.9	2682	2268	2312	3734	3156	4044	3636	3846	3500	3296	3516	3472	4664	3416	3016	3454	3278	3154	3008	2952	3222	4176	3642	3048	5284	4954	5178	4338	5200	6180	5228	4452	4922	5388	6096	4718	142430	2420.67	227.388	3577.78	272.821	3497	594.52	3341.33	479.593	5189	595.109	5134	579.986
2.1.1.191	3318	3122	2516	3400	2938	4066	4002	4300	4294	3840	4378	3896	6470	4918	3970	5062	5766	4030	2038	2032	2640	2562	1800	1384	5060	5046	5102	5030	4498	6116	4322	3890	3836	4084	4222	3826	141774	2985.33	418.102	3901.56	469.137	5036	974.91	2076	471.744	5142	527.92	4030	211.611
3.8.1.2	3798	2938	2882	5160	4506	4950	5204	5712	4138	5424	5764	5364	4738	3476	2856	3072	2580	2768	2950	2380	2996	3624	3088	2778	4462	4096	4404	3558	4136	5246	3808	3466	3566	3884	4446	3426	141644	3206	513.451	5135.78	535.466	3248.33	791.625	2969.33	406.861	4317	556.654	3766	380.444
2.7.7.12	2188	1980	1824	3388	2866	3796	3468	3888	3976	3608	4258	4004	4686	3542	2796	3536	3210	2878	3040	2646	3360	3406	2338	1862	6382	6168	6396	5994	5804	7864	4414	3998	3966	4770	4846	4270	141416	1997.33	182.618	3694.67	415.248	3441.33	686.383	2775.33	608.57	6434.67	736.247	4377.33	374.109
2.7.4.22	3590	2870	2756	3744	3386	3770	3980	4276	3738	4126	4378	4046	5008	3834	3276	4328	4140	3446	2866	2386	3018	3688	2600	2368	4508	4232	4258	4768	4714	6256	4612	4272	4210	4598	5210	4148	141404	3072	452.208	3938.22	309.673	4005.33	632.728	2821	497.151	4789.33	752.24	4508.33	396.439
2.3.1.181	3776	2896	2742	3728	3136	3882	4162	4584	4302	4574	4886	4138	4444	3598	2918	3494	3770	3186	2700	2344	2744	3060	2206	1916	4548	4052	4366	5652	4742	6454	4832	4308	4420	4800	5464	4426	141250	3138	557.864	4154.67	525.729	3568.33	525.924	2495	415.888	4969	906.089	4708.33	428.449
4.1.1.48	3320	2632	2616	3672	3210	3778	3768	4440	3854	4112	4328	4104	4646	3428	3258	3522	3574	3064	2856	2466	3266	3664	2584	2240	5280	4760	5078	4870	4954	6370	4490	4212	4308	4812	5264	4408	141208	2856	401.915	3918.44	374.298	3582	553.674	2846	534.023	5218.67	591.795	4582.33	392.107
3.7.1.14	2412	1906	2026	4684	4122	4882	5122	5628	4816	4882	5264	4936	4710	3494	2644	3178	2988	3004	2554	2486	2894	3926	2108	1928	4978	4798	4782	4110	4590	5608	4300	3790	4076	4358	5070	4080	141134	2114.67	264.396	4926.22	413.297	3336.33	727.736	2649.33	712.583	4811	490.785	4279	436.416
1.1.1.300	3214	2150	2362	3414	3066	4402	4056	4280	4482	3644	4124	4016	4400	3486	3074	3340	4100	2868	3040	3020	3918	3770	2300	1906	5752	5398	5726	5462	5086	6928	4296	3922	3828	4122	4374	3748	141074	2575.33	563.167	3942.67	474.868	3544.67	594.092	2992.33	790.456	5725.33	637.551	4048.33	255.942
4.2.1.59	3198	2780	2594	3820	3238	4258	4204	5102	4124	4146	4428	4444	4696	3406	3004	4112	4948	3162	2586	2254	2412	3124	2840	2194	5130	4822	4894	5698	5450	6898	3716	3392	3378	3702	4498	3740	140392	2857.33	309.337	4196	500.861	3888	820.67	2568.33	359.514	5482	769.153	3737.67	407.112
2.1.1.193	3320	2962	2724	3286	2856	3380	3666	4090	3604	3582	3780	3350	4142	3232	2862	3256	3920	2844	3060	2458	3094	4230	2602	2188	5366	4946	5176	5378	5216	6822	4790	4400	4378	4890	5928	4226	140004	3002	300.007	3510.44	347.859	3376	541.304	2938.67	723.087	5484	674.023	4768.67	623.258
3.5.1.128	3936	2894	2736	3814	3314	3724	3966	4548	3614	3944	3904	4038	5136	3516	3058	3894	3618	3190	3222	2588	3264	3804	3508	2968	4688	4116	4566	4170	4448	5580	4266	3892	4112	4488	5144	4164	139832	3188.67	652.013	3874	335.92	3735.33	749.011	3225.67	421.586	4594.67	531.298	4344.33	437.572
4.1.3.34	3052	2574	2474	4516	3836	4330	4428	5220	4040	4772	4746	4510	3958	3024	2502	2936	2636	2918	2604	2340	3124	3282	2704	2022	4474	4126	4464	5006	4846	6154	4480	4236	4132	5076	5070	4290	138902	2700	308.914	4488.67	409.066	2995.67	511.771	2679.33	472.113	4845	712.624	4547.33	422.576
2.3.1.274	3894	2942	2806	4058	3754	4066	4174	4638	4004	4524	4570	4186	5006	3690	3168	3690	3936	3262	2678	2310	2876	3644	2878	2420	4868	4594	4842	5488	4660	6130	3546	3220	3368	3206	3432	3424	137952	3214	592.81	4219.33	297.212	3792	661.153	2801	474.041	5097	596.894	3366	131.939
6.2.1.42	1842	1982	1366	5226	4294	5064	4928	5340	4262	4952	4616	4866	4238	3018	2604	2958	1982	2816	2368	2522	3416	4202	2342	1776	4952	5026	5584	3732	6146	5412	4090	3828	3814	4050	4468	3858	137940	1730	322.912	4838.67	379.555	2936	739.885	2771	878.893	5142	814.117	4018	249.81
6.3.4.18	3448	2688	2622	3082	2604	3132	3112	3450	2786	2904	2900	3212	4902	3342	2870	3710	4202	2610	2792	2654	3254	4692	3042	2652	4748	4850	5014	3806	5072	5404	5484	4974	4700	5316	6448	5022	137500	2919.33	459.027	3020.22	250.57	3606	854.29	3181	776.745	4815.67	543.39	5324	615.162
4.2.1.6	2360	2068	2008	3780	3636	4158	4086	4592	4182	4250	4348	3858	5768	4154	3248	3944	3030	3290	3308	2638	3440	3284	2924	2460	4680	4454	4780	4786	5162	6560	3664	3428	3288	3878	3806	3534	136834	2145.33	188.312	4098.89	298.455	3905.67	1010.92	3009	399.263	5070.33	764.837	3599.67	225.876
2.4.2.9	3968	2892	3054	3372	2876	3598	3284	3852	3576	3734	3932	3772	4486	3358	2952	4062	4526	3310	2866	2320	3064	4128	2478	2022	4332	4030	4420	4928	4556	6170	4816	4254	4018	4504	4980	4334	136824	3304.67	580.146	3555.11	331.611	3782.33	666.185	2813	745.116	4739.33	759.876	4484.33	360.332
1.8.99.2	4638	3658	3964	3608	3318	3564	3844	4148	4104	3772	4812	3906	3062	2652	2254	2170	2454	2350	3500	2910	3170	2206	3008	2526	5952	5394	5500	7314	5402	7646	3318	3286	3248	3572	3200	3362	136792	4086.67	501.383	3897.33	431.746	2490.33	326.319	2886.67	461.543	6201.33	1016.84	3331	130.603
4.2.1.119	3002	2168	2152	4556	4070	4890	4568	5180	4192	4786	5008	5054	3948	3204	2890	2556	1932	2756	3214	2744	3464	4134	2826	2610	4700	4620	5246	4824	5226	5674	3428	3338	3316	3408	3704	3382	136770	2440.67	486.195	4700.44	385.227	2881	673.016	3165.33	571.13	5048.33	404.284	3429.33	140.943
2.7.7.76	3758	2412	2734	3686	3582	4102	3926	4522	4142	4288	4462	4046	5228	4090	3402	3992	3422	3018	2552	2224	2848	2928	2238	1842	4962	4588	4894	4932	4530	6356	3920	3528	3418	4074	4006	3792	136444	2968	702.848	4084	319.54	3858.67	781.321	2438.67	415.26	5043.67	668.617	3789.67	265.045
3.4.15.5	5064	3720	3936	2920	2496	2868	2962	3510	2952	2894	2742	3164	6346	4158	3680	4948	5770	3786	2560	2044	2466	3648	2510	2380	4246	3830	3996	5926	5338	6672	4078	3538	3632	3980	4002	3642	136404	4240	721.731	2945.33	278.273	4781.33	1099.6	2601.33	544.699	5001.33	1158.68	3812	233.005
1.1.1.103	4548	3572	3734	3200	2660	3424	3334	3928	3580	3698	3626	3448	5668	4182	3464	4108	4598	3300	2556	2332	2670	3014	2732	2556	4032	3858	3814	5236	4086	5538	4466	4116	3776	4622	4666	4118	136260	3951.33	523.039	3433.11	359.867	4220	856.914	2643.33	227.222	4427.33	756.391	4294	348.292
2.7.2.18	3732	3018	2814	2680	2360	3256	3018	2964	3246	2914	3152	3076	4784	3454	3266	4264	4140	2924	2808	2612	3392	3644	2174	1980	4774	4790	4792	5300	4936	6112	5022	4534	4786	5260	5532	4586	136096	3188	482.033	2962.89	288	3805.33	703.026	2768.33	656.729	5117.33	526.589	4953.33	393.037
5.3.1.5	2766	2414	2422	3212	3160	4084	4102	4624	4338	3838	4482	4266	6000	4104	3468	3778	3186	3066	2762	2550	3052	3796	2284	1904	4894	4744	4964	4486	4708	6280	3746	3340	3268	3968	3888	3488	135432	2534	200.958	4011.78	521.5	3933.67	1081.82	2724.67	656.428	5012.67	642.645	3616.33	292.729
1.5.1.7	4022	3652	3328	2332	1994	2620	2776	3136	2886	2760	2828	3146	4350	3340	3078	4540	4888	3324	2526	2004	2688	3364	2022	1766	4452	4054	4290	5624	4552	6418	5572	4976	5148	5698	5896	5048	135098	3667.33	347.254	2719.78	368.461	3920	762.483	2395	588.153	4898.33	920.664	5389.67	382.347
1.1.1.219	3384	2490	2784	4066	3362	4338	4046	4614	4254	4258	4394	4124	4490	3686	2928	3588	4180	3378	2606	2210	2734	3186	2242	1798	4582	4178	4124	4672	4150	5314	4292	4080	3712	4106	4432	3810	134592	2886	455.645	4161.78	348.371	3708.33	559.731	2462.67	484.085	4503.33	461.822	4072	274.76
6.2.1.20	3088	2960	2322	4484	3774	4264	4572	5900	4558	4634	5066	5076	4796	3210	2882	3056	3194	2640	2520	2278	2758	3152	2734	2562	4980	4770	4786	3912	4456	4792	3522	3090	3156	3416	3982	3240	134582	2790	410.322	4703.11	596.906	3296.33	765.132	2667.33	293.922	4616	384.006	3401	327.137
1.3.1.10	3750	2832	3020	4468	3668	4300	4364	5418	3952	4746	4870	4512	5388	3872	3106	3670	4032	3226	2532	2130	2574	3026	2668	2236	3888	3762	3788	3392	3842	4796	3656	3526	3492	3750	4590	3626	134468	3200.67	484.934	4477.56	510.857	3882.33	820.743	2527.67	320.438	3911.33	468.018	3773.33	410.679
3.2.1.54	2646	2196	2188	2578	2132	2872	2754	2974	3478	2764	3334	2912	6060	4816	3790	5064	6092	3504	2190	2066	2488	3434	1800	1442	4516	3870	4082	5922	4710	6940	4534	4344	4550	5134	5584	4662	134422	2343.33	262.148	2866.44	395.606	4887.67	1093.66	2236.67	685.602	5006.67	1187.55	4801.33	466.141
3.2.1.133	2646	2196	2188	2578	2132	2872	2754	2974	3478	2764	3334	2912	6060	4816	3790	5064	6092	3504	2190	2066	2488	3434	1800	1442	4516	3870	4082	5922	4710	6940	4534	4344	4550	5134	5584	4662	134422	2343.33	262.148	2866.44	395.606	4887.67	1093.66	2236.67	685.602	5006.67	1187.55	4801.33	466.141
2.7.1.6	2982	1996	2058	3026	2598	3754	3686	3880	4232	3722	4038	4172	4608	3548	2678	3380	3482	3118	2568	2574	3192	3728	1674	1326	5690	5540	5660	5672	5330	7018	3916	3814	3710	4012	4210	3738	134330	2345.33	552.24	3678.67	538.59	3469	641.955	2510.33	900.762	5818.33	603.008	3900	189.019
3.1.26.3	3418	2590	2626	3720	2920	3928	3642	3692	3496	3708	3762	3858	4466	3360	2792	3676	3946	2980	2766	2494	2812	3636	2450	2204	4464	4346	4554	5020	4518	6256	4412	3910	3968	4498	5114	4120	134122	2878	468	3636.22	295.4	3536.67	623.898	2727	497.91	4859.67	721.946	4337	447.405
3.2.2.20	3634	2524	2828	3966	3290	4354	4254	4478	4116	4374	4576	4250	4702	3746	3096	3396	3502	3046	2554	2300	2768	3618	2586	2158	4382	4186	4314	3874	4422	5120	3974	3644	3696	3980	4600	3770	134078	2995.33	573.607	4184.22	381.73	3581.33	607.582	2664	515.296	4383	411.665	3944	350.517
2.3.1.40	3084	2960	2316	4408	3726	4226	4532	5820	4524	4588	5018	4992	4794	3206	2880	3056	3194	2636	2520	2278	2758	3152	2730	2562	4978	4762	4782	3900	4456	4788	3522	3090	3156	3416	3982	3240	134032	2786.67	412.298	4648.22	585.984	3294.33	765.343	2666.67	293.745	4611	386.68	3401	327.137
2.1.2.2	3462	2534	2396	3484	2878	3770	3414	4114	3470	3918	3946	3558	4338	3242	2780	3422	3640	2800	2858	2394	2896	3466	2626	2056	4714	4588	4686	4868	4858	6170	4314	4086	4216	4476	5194	4094	133726	2797.33	579.739	3616.89	370.704	3370.33	583.44	2716	482.172	4980.67	592.348	4396.67	417.044
2.1.1.170	3470	2706	2678	3202	2700	3310	3350	3832	3300	3754	3996	3504	4444	3438	2962	3274	3782	2812	2678	2434	2894	3310	2446	2014	4868	4604	4672	5116	4678	6290	4396	4140	4252	4468	5348	4568	133690	2951.33	449.397	3438.67	389.602	3452	595.742	2629.33	444.1	5038	640.999	4528.67	429.358
1.1.2.4	4318	2952	3202	4582	3716	4256	4578	5226	3940	4454	4682	4286	6438	3958	3390	4172	3914	3314	2814	1988	2562	3288	3094	2654	3308	2920	3304	3334	3356	4738	3550	3280	3374	3712	3474	3256	133384	3490.67	727.314	4413.33	438.907	4197.67	1148.12	2733.33	455.063	3493.33	631.245	3441	173.808
3.4.23.36	3294	2492	2646	3134	2846	3334	3486	3780	3406	3488	3470	3326	4594	3512	2972	3846	4612	3286	2502	2268	2722	3406	2090	1726	4922	4584	4660	5558	4870	6940	4162	3956	4032	4362	4786	4114	133184	2810.67	425.602	3363.33	259.779	3803.67	681.842	2452.33	579.222	5255.67	893.802	4235.33	302.902
7.2.4.3	2456	2442	2332	3708	3664	3920	3850	3944	3828	3844	3896	3652	4374	3560	2974	3718	4348	3168	3176	2854	3124	2570	2252	2032	5146	4348	4482	6240	5018	6758	3510	3322	3438	3780	3842	3446	133016	2410	67.9117	3811.78	110.22	3690.33	583.72	2668	466.423	5332	967.666	3556.33	207.3
2.7.6.3	3530	2642	2696	3382	2884	3794	3506	4070	3234	3516	3650	3494	4434	3306	2570	3688	3686	2844	2700	2168	2850	3352	2580	2050	4604	4498	4764	4754	4830	6040	4358	4118	4126	4516	5178	4216	132628	2956	497.831	3503.33	335.075	3421.33	669.035	2616.67	474.523	4915	564.302	4418.67	401.714
2.7.1.39	3674	2680	2702	3664	3096	3934	3644	4762	3588	3728	3936	3596	4574	3480	3014	3206	2834	2758	2670	2372	3080	3830	2656	2292	4666	4524	4436	4208	4594	5710	4006	3590	3798	4150	4928	3822	132202	3018.67	567.642	3772	445.117	3311	671.759	2816.67	568.598	4689.67	524.326	4049	471.148
3.7.1.26	3406	2680	2936	5056	4532	5228	5258	6162	4588	5844	6082	5042	5350	3648	2976	3168	2594	3166	2040	1686	2128	2746	2292	2128	3888	3608	3804	3444	3660	4470	2916	3022	2816	3300	3434	3102	132200	3007.33	368.219	5310.22	599.935	3483.67	975.704	2170	346.798	3812.33	357.477	3098.33	233.298
4.3.3.6	2416	2096	1964	3306	3000	3732	3414	3572	3492	3530	3810	3580	4276	3520	2950	3426	2748	3120	2856	2468	3078	3466	2308	2204	4306	3962	4168	4422	4252	5984	4944	4666	4618	5426	5642	4692	131414	2158.67	232.425	3492.89	239.021	3340	541.638	2730	490.322	4515.67	735.619	4998	435.682
2.4.2.10	3494	2576	2796	3366	2898	3588	3430	3978	3578	3712	3838	3496	4500	3324	2928	3938	3908	3020	3012	2512	3096	3700	2752	2364	4350	3842	4278	4692	4138	5674	4136	3608	3694	4278	4492	3834	130820	2955.33	479.293	3542.67	310.321	3603	613.712	2906	479.685	4495.67	640.44	4007	349.973
4.1.99.17	3232	3028	2720	5060	4380	4756	4618	5544	4212	4880	5094	4944	4264	3386	3136	3462	3286	4058	2752	2142	2706	2252	3710	3296	3208	3088	3172	3278	3382	3682	3136	3070	2968	3326	4110	3336	130674	2993.33	257.754	4832	400.421	3598.67	453.736	2809.67	602.986	3301.67	211.143	3324.33	410.984
2.7.4.8	3580	2682	2816	3020	2708	3216	3340	3580	3566	3460	3836	3686	4432	3202	2632	3508	3726	2864	2708	2224	2840	3200	2470	1912	4462	4162	4442	4762	4442	6222	4490	4192	3896	4686	5264	4174	130402	3026	484.434	3379.11	352.179	3394	647.931	2559	458.432	4748.67	746.369	4450.33	483.642
2.3.1.191	3968	3124	3158	3288	2704	3418	3814	4396	3388	3814	3884	4082	3942	3034	2488	3470	4358	2876	2770	2230	2610	3220	2528	2060	4852	4464	4608	5808	5014	6258	3186	3288	3136	3516	3792	3290	129836	3416.67	477.771	3643.11	499.961	3361.33	699.676	2569.67	410.259	5167.33	711.405	3368	245.403
1.1.1.26	3136	2262	2478	4618	3978	4694	4750	5510	4536	5124	5574	4822	4688	3654	2908	3292	2838	3446	2134	1858	2448	2632	2628	2596	4056	3730	3778	3922	3660	4864	3088	2918	2978	3262	3464	3166	129490	2625.33	455.246	4845.11	497.815	3471	673.038	2382.67	319.138	4001.67	445.754	3146	199.275
3.4.21.62	3422	2328	2820	4176	3302	4088	4224	4516	3826	4248	4322	4292	6150	4228	3842	4418	4052	3674	2290	2016	2618	3060	2106	1944	4194	3944	4048	4662	3902	5010	3050	2840	2708	2930	3306	2836	129392	2856.67	547.921	4110.44	355.897	4394	900.193	2339	427.721	4293.33	446.04	2945	210.07
1.3.99.38	2102	1638	1568	3630	3116	3866	3712	4082	3360	3868	3582	3452	4040	2844	2646	2750	2010	2300	2738	2494	3218	3772	2406	1890	4964	5274	5382	4180	5020	5832	4880	4100	4256	4872	5274	4242	129360	1769.33	290.216	3629.78	294.629	2765	697.496	2753	661.373	5108.67	550.721	4604	469.694
2.1.1.71	3036	2312	2328	4468	3984	4584	4782	5680	4500	4838	5034	4418	4160	3384	2576	3036	2744	3028	2510	2076	2634	2840	2476	1760	3448	3238	3516	3556	3642	4636	3902	3474	3752	3880	4656	3884	128772	2558.67	413.46	4698.67	473.968	3154.67	565.14	2382.67	394.716	3672.67	491.226	3924.67	392.919
2.1.1.17	3036	2312	2328	4456	3978	4584	4782	5668	4496	4830	5028	4418	4160	3384	2574	3032	2718	3040	2494	2068	2622	2812	2470	1744	3424	3224	3502	3548	3634	4618	3902	3474	3752	3880	4656	3884	128532	2558.67	413.46	4693.33	472.129	3151.33	569.082	2368.33	391.742	3658.33	490.25	3924.67	392.919
4.1.99.2	5326	3938	4220	2132	2024	2444	2526	2536	2944	2686	3010	2622	5576	4400	3604	4402	4672	3278	3042	2578	3294	3050	2372	2166	4474	3522	3850	4516	4128	5434	3992	3716	3884	4158	3876	4128	128520	4494.67	733.633	2547.11	326.697	4322	813.998	2750.33	443.784	4320.67	662.977	3959	167.818
4.2.1.107	2734	1974	1972	4208	3824	4546	4130	4724	3880	4288	4546	4624	3654	2908	2666	2372	1838	2530	3082	2620	3346	3852	2632	2396	4526	4450	5068	4626	4994	5450	3254	3124	3152	3190	3472	3188	127840	2226.67	439.365	4307.78	325.139	2661.33	604.168	2988	547.014	4852.33	385.585	3230	126.352
1.7.99.1	4174	3562	3292	3066	2622	3280	3312	3562	3990	3328	3916	3370	5500	4150	3520	5186	5916	3562	2732	2174	2914	2370	2774	2606	2798	2966	2688	3256	2758	3970	4228	3958	3802	4010	3836	4000	127148	3676	451.916	3382.89	415.787	4639	1031.74	2595	275.883	3072.67	484.277	3972.33	151.892
1.3.8.6	4184	2904	3328	3280	3072	3164	3310	3742	2868	3546	3460	3410	4568	3296	3140	3504	3454	2912	2756	2318	2850	3358	3410	3230	3278	2782	2916	3036	3310	4138	4794	4462	4330	4762	5188	4170	126230	3472	652.037	3316.89	261.872	3479	575.686	2987	423.157	3243.33	483.536	4617.67	370.026
3.2.1.25	2156	2012	1708	2636	2370	2970	3088	3136	3552	2952	3018	2964	5230	3894	3358	4134	4376	2930	2458	2336	3156	3308	1674	1314	5620	5230	5432	5912	5698	6906	3470	3070	3270	3612	3610	3648	126208	1958.67	228.712	2965.11	326.766	3987	804.925	2374.33	788.16	5799.67	589.73	3446.67	231.595
4.1.2.27	1904	1714	1524	2188	1948	2580	2600	2566	2942	2312	2678	2414	3620	3286	2428	2676	2364	2422	3138	2946	4198	4150	2004	1564	4414	4442	4470	3922	4266	5198	6514	5802	5944	6422	7034	5600	126194	1714	190	2469.78	292.483	2799.33	528.268	3000	1080.16	4452	418.062	6219.33	533.879
1.17.2.1	3666	2386	2736	5956	5152	5708	6058	6980	5274	6276	6600	5468	3584	2918	2374	2150	1902	2776	2198	1858	2370	2288	1930	1624	3690	3578	3614	4120	3886	4782	2152	1830	1884	1990	1996	1966	125720	2929.33	661.539	5941.33	610.877	2617.33	606.52	2044.67	287.582	3945	456.935	1969.67	110.645
2.4.1.20	2268	2420	1914	2116	2196	3038	2676	2566	3162	2346	2872	2824	3252	3104	2216	3058	3396	2534	2782	2576	3396	2506	1262	948	5112	5102	5176	4842	4438	6332	5718	5176	5086	5820	6002	4974	125206	2200.67	259.633	2644	367.992	2926.67	454.763	2245	942.269	5167	632.712	5462.67	435.112
1.1.1.47	2524	1882	1872	5010	4232	5082	5026	5978	4514	5180	5174	4912	4142	3260	2478	2700	2180	2838	2568	2288	2786	3162	2430	2062	4000	3546	3896	3174	3708	4668	2864	2684	2830	3058	3374	2870	124952	2092.67	373.579	5012	482.069	2933	693.68	2549.33	387.75	3832	502.265	2946.67	240.967
5.4.99.63	1826	1804	1354	3468	3020	3324	3076	3854	2926	3326	3096	3274	3428	2330	2184	2598	2040	2640	2462	2270	3064	3772	2706	2342	3892	3760	3918	2782	3980	4330	6140	5632	5466	6348	7164	5308	124904	1661.33	266.386	3262.67	281.645	2536.67	494.505	2769.33	569.663	3777	523.534	6009.67	692.024
1.2.99.7	3172	2386	2378	3720	3062	3658	3826	3952	3688	4118	4440	3820	4926	3862	3296	3234	2978	2820	2446	2378	2700	3124	2106	1810	4164	3990	4146	4156	4460	5290	3260	3092	3166	3730	3790	3532	124676	2645.33	456.124	3809.33	373.81	3519.33	775.826	2427.33	457.565	4367.67	476.922	3428.33	297.6
2.5.1.26	2122	1666	1634	3344	2934	3312	3294	3714	3378	3194	3514	3000	4456	3716	3126	3174	3022	2630	2262	2096	3212	2612	1704	1250	4140	3534	3826	4836	4016	5458	5110	4772	4772	5570	5354	4588	124342	1807.33	272.979	3298.22	239.936	3354	642.531	2189.33	686.496	4301.67	713.573	5027.67	382.475
2.4.1.4	2012	1592	1592	2442	2292	3064	2842	2790	3474	2574	2746	3034	4244	3156	2636	3142	3200	2488	2578	2544	2854	3750	2454	1816	6204	5864	6488	4684	5280	6200	4260	3700	3772	4232	4144	4020	124164	1732	242.487	2806.44	357.148	3144.33	616.714	2666	632.53	5786.67	680.506	4021.33	237.408
2.7.7.18	3254	2654	2720	3204	2800	3478	3468	3698	3394	3614	3650	3492	4084	3382	2510	3008	3268	2780	2628	2254	2806	3260	2160	1900	4036	3920	4238	4694	4346	5774	3964	3528	3898	4098	4276	3658	123896	2876	329.017	3422	276.217	3172	548.428	2501.33	494.717	4501.33	678.934	3903.67	276.242
2.7.1.48	3240	2622	2454	2500	2330	3150	2924	3142	3478	2740	3216	3038	4936	4174	3282	4156	4928	3420	2332	2198	2654	2138	1594	1318	4708	4100	4106	6206	4464	6722	3358	3208	3212	3696	4062	3490	123296	2772	413.913	2946.44	364.985	4149.33	708.521	2039	493.36	5051	1130.12	3504.33	329.43
4.2.1.19	3704	2748	2782	2944	2554	3284	3302	3700	3082	3168	3606	3302	4414	3118	2694	3270	3566	2918	2824	2474	2910	3678	2502	2074	4134	3940	4122	4268	4280	5460	3786	3388	3662	3824	4146	3468	123096	3078	542.398	3215.78	342.465	3330	608.857	2743.67	545.284	4367.33	549.302	3712.33	273.272
3.6.1.66	3058	2566	2442	3064	2618	3344	3104	3602	3290	3330	3512	3246	3928	2836	2632	3216	3498	2660	2696	2228	2892	3200	2402	2002	4270	4072	4230	4964	4472	6014	3960	3562	3564	4112	4674	3658	122918	2688.67	325.806	3234.44	287.784	3128.33	516.71	2570	443.683	4670.33	727.073	3921.67	431.395
3.7.1.3	4780	3296	3560	3026	2372	2890	2854	3296	2816	3116	3356	3038	5484	3852	3506	3900	3910	2920	2432	2186	2752	3360	2746	2596	3662	3352	3414	4294	4266	5178	3420	3098	3424	3488	3746	3274	122660	3878.67	791.66	2973.78	292.702	3928.67	851.136	2678.67	396.112	4027.67	695.389	3408.33	216.841
1.3.98.1	2942	2404	2168	3008	2528	2990	3110	3340	3078	3394	3470	3216	4084	3254	2610	3070	3376	2344	2382	2350	2650	3136	1858	1770	5102	4626	4978	5668	5074	6366	3768	3500	3426	3838	3850	3620	122348	2504.67	396.698	3126	282.099	3123	612.782	2357.67	507.333	5302.33	619.675	3667	179.505
1.1.1.127	2972	2242	2456	3914	3298	4006	4068	4506	4080	4304	4272	4214	4274	3132	2608	2472	2186	2416	2512	1938	2528	2844	2082	1856	4564	4304	4688	4276	4636	5696	3128	2988	2834	3258	3404	3098	122054	2556.67	375.267	4073.56	341.101	2848	766.548	2293.33	391.995	4694	519.832	3118.33	199.725
2.7.1.148	2912	2204	2258	2988	2546	3060	3004	3684	2880	3452	3702	3320	3682	2738	2194	2646	2910	2334	2524	2186	2612	2954	2328	1780	4444	4136	4570	4930	4770	5906	4382	4032	3998	4604	5314	4070	122054	2458	394.102	3181.78	386.37	2750.67	526.759	2397.33	400.643	4792.67	610.122	4400	506.609
3.5.1.53	3068	2444	2254	3450	3042	3674	3948	4114	3616	3750	4048	4102	4586	3620	3102	3484	3144	2764	2530	2128	2890	2582	2366	1866	4216	4020	4002	4188	3944	4994	3322	3228	3088	3422	3480	3264	121740	2588.67	425.847	3749.33	353.447	3450	633.386	2393.67	360.605	4227.33	390.767	3300.67	140.847
1.8.3.7	3242	2492	2706	3000	2612	3164	2960	3484	3182	2998	3060	3226	4924	3810	3616	4312	5234	3544	2312	1892	2420	2868	2208	1716	4126	3580	3722	5922	5324	6414	2900	3086	2550	3000	3206	2832	121644	2813.33	386.349	3076.22	236.857	4240	709.897	2236	407.081	4848	1202.45	2929	228.171
4.1.2.4	3166	2664	2602	2334	2278	2686	2832	2996	3132	2950	3246	3000	4306	3224	2700	3634	3824	2876	2378	2046	2712	3464	2186	1604	4222	3732	3890	4976	4232	5560	4418	4018	4008	4616	5150	3944	121606	2810.67	309.285	2828.22	336.628	3427.33	607.69	2398.33	637.908	4435.33	698.014	4359	470.514
4.1.3.4	2526	2026	2096	3086	2710	3182	3342	3598	3190	3198	3070	3044	4436	3402	2766	2970	3344	2288	2618	2216	2550	3228	2350	2168	4322	3958	3998	4166	4340	5364	4604	3992	4032	4276	4824	4018	121298	2216	270.74	3157.78	239.083	3201	729.689	2521.67	389.094	4358	517.71	4291	350.227
3.1.1.114	2960	2070	2352	3240	2678	3258	3188	3812	3022	3280	3390	3334	3970	2928	2424	2710	2338	2284	2426	2262	2934	3560	2214	1880	5112	5114	5030	4154	5474	5640	3826	3428	3510	3766	4104	3616	121288	2460.67	454.842	3244.67	301.314	2775.67	634.178	2546	604.579	5087.33	515.882	3708.33	245.019
5.1.1.3	2850	2418	2362	2888	2558	3110	3396	3490	3118	3460	3344	3254	4228	3252	2756	3778	3818	3056	2642	1962	2416	3068	2166	1956	3904	3512	3902	4858	4192	5732	3814	3316	3518	3904	5094	3896	120988	2543.33	267.053	3179.78	302.989	3481.33	551.086	2368.33	434.227	4350	811.765	3923.67	619.142
2.2.1.9	2442	1806	1902	2074	1966	2256	1984	2060	2226	1976	2098	2388	4216	2800	2794	2912	3028	2166	2496	2354	2976	4066	1922	1704	4764	4858	4798	4064	4866	5618	5826	5016	4912	5852	6558	5180	120924	2050	342.859	2114.22	145.947	2986	672.904	2586.33	851.263	4828	492.978	5557.33	634.385
2.4.2.19	2222	1972	1788	2904	2618	3032	3018	3428	2862	3056	3464	3224	3594	2488	2198	2852	3292	2516	2530	2298	2686	3820	2420	2032	4708	4374	4560	5228	5190	6066	3984	3542	3806	4296	4822	3788	120678	1994	217.835	3067.33	270.767	2823.33	531.477	2631	623.082	5021	615.229	4039.67	457.484
2.3.1.168	3050	2358	2402	2878	2442	3354	3154	3396	3126	3494	3506	3504	4896	3486	2900	3626	2742	2904	2332	2074	2766	3230	2088	1918	3852	3714	3746	3200	3536	4352	4662	4054	4042	4730	4944	4130	120588	2603.33	387.45	3206	357.095	3425.67	802.685	2401.33	502.676	3733.33	379.671	4427	397.463
4.2.1.10	3660	2470	2732	3530	2888	3510	3616	4104	3494	3826	3982	3584	4424	3276	2700	3200	3148	2938	2388	2200	2554	3092	2126	1854	3810	3632	3854	4006	3876	5066	3584	3030	3070	3568	4094	3214	120100	2954	625.29	3614.89	350.127	3281	597.651	2369	426.65	4040.67	516.66	3426.67	404.931
3.1.1.29	3208	2432	2476	2836	2676	3188	3166	3628	3220	3394	3580	3134	3946	3094	2524	3236	3520	2666	2560	2136	2726	3086	2138	1824	4362	3734	4074	4488	4238	5560	3770	3520	3390	3894	4494	3612	119530	2705.33	435.878	3202.44	311.908	3164.33	530.273	2411.67	462.984	4409.33	621.344	3780	392.636
3.4.22.70	2534	1902	1984	2476	2276	2864	2764	3068	3022	2646	2940	2596	3776	2796	2396	2704	2110	2346	2512	2266	3110	3250	1960	1510	4496	4594	4442	3818	4566	5312	5036	4368	4408	5036	6172	4480	118536	2140	343.668	2739.11	264.012	2688	588.553	2434.67	668.669	4538	475.894	4916.67	686.265
2.8.2.40	1844	1570	1426	3932	3472	3960	3930	4468	3942	3594	4218	3880	3194	2714	2084	2816	3152	2514	2396	2030	2662	2944	2032	1512	4864	4840	4862	5150	4858	6530	2972	2696	2650	2938	2886	2948	118480	1613.33	212.342	3932.89	295.491	2745.67	415.579	2262.67	512.309	5184	669.861	2848.33	139.447
2.7.7.56	2812	2208	2160	3298	2784	3202	3190	3550	2924	3432	3762	3394	3604	2888	2536	2650	2590	2360	2554	2106	2662	3234	2364	2174	3884	3832	4096	3650	4204	4938	4302	3856	3934	4548	4878	3866	118426	2393.33	363.369	3281.78	301.777	2771.33	442.521	2515.67	411.449	4100.67	454.764	4230.67	420.998
6.1.1.22	3208	2680	2694	3088	2484	3076	3120	3310	3414	3118	3458	2846	3894	3454	2872	3252	4304	2878	2788	2580	2760	2808	2516	2192	4270	3908	4054	6046	4926	6488	2626	2682	2544	2530	2730	2608	118206	2860.67	300.881	3101.56	299.219	3442.33	570.366	2607.33	235.714	4948.67	1087.95	2620	77.4597
2.1.1.245	3114	2482	2862	2476	2436	3578	3930	3648	4776	3286	4034	3414	3342	3078	2198	2538	2212	2676	3600	2974	3204	1902	1746	1338	4824	4646	4546	6124	4168	7262	2390	2642	2362	2674	2542	2896	117920	2819.33	318.153	3508.67	738.191	2674	462.16	2460.67	916.229	5261.67	1185.23	2584.33	198.742
4.1.1.65	3436	2652	2692	2570	2354	2844	2938	3412	2948	3106	3146	2886	3284	2466	2318	2902	3424	2468	2686	2242	2604	3174	2688	2218	4924	4466	4706	4878	4894	6106	3404	3074	3234	3454	3978	3222	117798	2926.67	441.549	2911.56	311.847	2810.33	466.369	2602	351.766	4995.67	570.37	3394.33	316.967
1.2.7.12	1796	1592	1606	3510	3124	3772	4084	4310	3964	3410	3852	3388	4276	3540	2330	5016	4442	3898	2602	2122	2618	1700	1750	1334	4226	3400	3616	5674	4098	6600	2682	2456	2300	2852	2872	2764	117576	1664.67	113.953	3712.67	381.677	3917	924.485	2021	520.12	4602.33	1261.24	2654.33	229.84
1.1.1.271	2486	1974	2048	3248	3006	3476	3340	3884	3668	3670	3818	3510	4284	2966	2656	2970	2990	2672	2528	2296	2706	2694	2062	1588	4240	3988	3860	3928	4088	5378	3644	3280	3292	3760	3762	3352	117112	2169.33	276.726	3513.33	282.383	3089.67	604.73	2312.33	432.377	4247	569.755	3515	232.034
3.2.1.141	1108	1308	1084	3682	3066	3780	3858	4264	3360	4226	4092	3930	3298	2646	2358	2316	2450	2840	2208	2064	2304	2894	1798	1508	4570	4394	4406	4606	4558	5714	3772	3436	3396	4110	4034	3376	116814	1166.67	122.985	3806.44	395.064	2651.33	372.244	2129.33	473.607	4708	500.756	3687.33	331.953
2.7.7.77	3064	2404	2354	2572	2292	3076	2920	3190	3024	2938	3180	3120	3840	2946	2364	3168	3612	2450	2352	2030	2592	2620	2084	1400	3984	3814	4050	4440	3742	5344	4478	3868	4056	4558	4970	3906	116802	2607.33	396.274	2923.56	302.355	3063.33	599.035	2179.67	454.542	4229	598.198	4306	435.506
1.1.98.2	2912	2208	2224	3902	3550	4376	4114	4492	4060	4398	4524	4550	4764	3662	2964	2952	1900	2956	2006	1848	2330	3014	1744	1516	3714	3726	3770	2716	3616	3918	3030	2688	2864	3194	3608	2974	116784	2448	401.915	4218.44	338.777	3199.67	951.449	2076.33	533.867	3576.67	432.976	3059.67	317.287
1.6.99.1	2580	2066	2140	2002	1718	2322	2510	2540	2862	2232	2592	2496	3680	2886	2464	3038	3184	2540	2928	2408	2926	2378	1868	1250	4824	4464	4414	5494	4520	6656	4354	3970	3912	4484	5704	4232	116638	2262	277.87	2363.78	342.281	2965.33	447.746	2293	646.968	5062	878.109	4442.67	655.734
6.3.3.2	2940	2416	2378	3078	2774	3140	3080	3394	3014	3032	3278	3286	4132	2972	2654	3502	3694	2928	2382	1984	2396	3154	2500	1958	3896	3696	3676	3864	3802	4738	3890	3392	3654	3986	4234	3654	116548	2578	314.076	3119.56	183.73	3313.67	556.853	2395.67	435.239	3945.33	398.151	3801.67	296.692
2.6.1.13	3316	2584	2692	2652	2326	2814	2644	3272	2884	2718	2864	3038	3360	2862	2326	2778	3268	2698	2712	2376	2892	3520	2292	2146	3656	3392	3492	4842	3904	5752	4054	3736	3716	4222	4556	3600	115956	2864	395.151	2801.33	266.552	2882	382.541	2656.33	505.237	4173	933.185	3980.67	365.909
2.7.4.16	2744	2128	2184	2940	2626	2974	2832	3636	2938	3212	3310	3120	3246	2450	1896	2812	2980	2370	2794	2342	2742	2962	2266	2076	4204	4034	4290	4824	4462	5444	3968	3462	3584	4026	4396	3596	115870	2352	340.635	3065.33	295.327	2625.67	484.505	2530.33	349.977	4543	516.785	3838.67	354.418
2.4.1.337	1938	1550	1506	3574	3174	3924	4034	4010	4250	3806	3940	3824	4790	3792	2832	3352	3510	3104	2116	1976	2166	2106	1474	1210	4858	4584	4312	4984	3320	5658	2768	2488	2484	2874	2830	2692	115810	1664.67	237.734	3837.33	309.708	3563.33	685.615	1841.33	400.637	4619.33	781.376	2689.33	168.986
7.3.2.5	2976	2324	2232	3394	2772	3440	3212	3680	3008	3406	3364	3154	3808	2746	2554	3510	3348	2902	2408	1848	2524	3198	2384	1952	3662	3606	3672	3690	4178	4782	3776	3440	3254	3766	4306	3338	115614	2510.67	405.607	3270	267.67	3144.67	486.114	2385.67	480.973	3931.67	466.552	3646.67	389.323
1.13.11.2	2148	1418	1538	5048	4318	5314	5480	6458	5112	5974	5954	5644	4288	3260	2506	2906	2080	2926	1358	1098	1518	1492	1280	1052	3448	3366	3604	2402	2730	3416	2682	2506	2522	2878	3250	2506	115480	1701.33	391.45	5478	627.685	2994.33	752.476	1299.67	195.171	3161	479.064	2724	295.976
2.4.1.182	3372	2510	2582	2934	2518	2864	3392	3596	3156	3368	3658	3386	3740	2676	2214	3130	3578	2558	2606	2032	2300	3168	2420	1970	4218	4130	3960	5594	4464	6304	2828	2600	2750	2782	3084	2908	115350	2821.33	478.248	3208	373.564	2982.67	602.481	2416	438.508	4778.33	948.236	2825.33	162.528
1.3.1.34	2888	2064	2044	1850	1608	2098	2110	2258	2256	2100	2120	2302	4072	3026	2458	2942	3154	2370	2650	1994	2312	2658	1884	1732	3550	3406	3622	4654	4242	5590	5288	4714	4716	5638	7984	4886	115240	2332	481.614	2078	221.025	3003.67	611.15	2205	396.478	4177.33	839.514	5537.67	1251.81
2.3.1.201	2308	1926	1826	3060	2572	3192	3696	4076	3594	3936	4054	3568	3668	2708	2624	2974	3506	2384	2648	2158	2492	2616	2304	1812	4332	4032	3886	6372	4188	6760	2748	2556	2284	2682	2936	2680	115158	2020	254.378	3527.56	502.926	2977.33	511.067	2338.33	318.538	4928.33	1283.18	2647.67	217.294
3.5.1.24	664	726	662	3484	2842	3420	3576	4030	3630	3148	3428	3204	2490	2118	1474	1224	1210	1582	2216	2064	2676	2140	1952	1544	7288	6836	7020	5734	5634	7824	3102	2874	3012	3278	3630	2972	114708	684	36.3868	3418	335.295	1683	515.513	2098.67	368.553	6722.67	871.372	3144.67	274.161
5.1.3.14	3400	2176	2662	2594	2336	2774	2942	3438	3042	3086	3612	3072	3912	2878	2454	3298	3650	2678	2222	1900	2308	2756	1966	1682	3930	3520	3492	4040	3268	5182	3860	3556	3660	4182	5068	3988	114584	2746	616.308	2988.44	393.653	3145	571.591	2139	377.369	3905.33	689.078	4052.33	545.856
3.5.1.5	1900	1794	1716	3878	3590	4124	3596	4716	3442	3920	3676	4078	4160	2834	2434	2892	2496	2670	2296	1996	2142	3584	2742	2626	3020	3012	3156	2098	3110	3148	3942	3348	3774	4284	4614	3746	114554	1803.33	92.3544	3891.11	386.708	2914.33	636.248	2564.33	574.188	2924	409.349	3951.33	444.41
1.17.1.1	3566	2486	2590	3308	2846	3394	3142	3286	3038	3406	3610	3156	4258	3040	2672	3212	3382	2360	1818	1622	1926	2100	2162	1798	4728	4440	4558	3250	3636	4138	3656	3560	3448	3794	3546	3464	114396	2880.67	595.79	3242.89	225.704	3154	655.732	1904.33	201.802	4125	575.367	3578	129.602
1.8.4.16	3988	3032	3128	1812	1712	1972	2116	2198	2226	1998	2282	2198	3514	2778	2514	3472	4468	2410	2484	2086	2568	2812	2778	2416	4572	4334	4304	5032	4634	5670	3634	3412	3752	3794	4606	3686	114392	3382.67	526.427	2057.11	197.543	3192.67	781.391	2524	266.272	4757.67	518.205	3814	410.34
4.1.3.1	3414	2598	2916	3232	3090	3328	3394	3740	3152	3628	3650	3518	4362	3278	3036	2846	2742	2710	2450	1894	2354	2862	2632	2966	3366	3188	3390	3156	3526	4018	3066	2790	3076	3364	4446	3138	114316	2976	411.296	3414.67	232.68	3162.33	624.482	2526.33	387.947	3440.67	314.202	3313.33	584.401
1.2.7.4	2686	2192	2490	2112	1932	2780	3242	2934	4098	2952	3634	2990	3274	3172	2558	3272	3216	3216	3942	3296	3488	1772	2022	1426	4524	3992	4136	5338	4378	6252	2882	2628	2568	2984	2776	2876	114030	2456	248.749	2963.78	674.411	3118	277.047	2657.67	1044.21	4770	864.912	2785.67	160.691
3.2.1.45	3350	2534	2626	1946	1764	2398	2292	2722	2416	2452	2720	2658	4888	3450	2698	3628	4248	2412	1902	1668	2250	2920	1458	1346	3426	3208	3552	5178	4450	5982	4182	3982	4094	4432	4734	3890	113856	2836.67	446.933	2374.22	333.899	3554	928.912	1924	585.756	4299.33	1108	4219	313.687
5.1.3.13	2516	1986	1832	2918	2572	3066	3134	3980	3130	3504	3642	3598	3434	2702	2142	3000	3420	2562	2144	1882	2326	2752	1744	1558	4454	4210	4304	4468	4076	5686	3630	3230	3184	3618	4108	3268	113780	2111.33	358.811	3282.67	432.175	2876.67	507.996	2067.67	433.559	4533	584.037	3506.33	354.07
2.9.1.1	2936	1952	2226	3368	3028	3222	3692	3796	3850	3956	4402	3720	4242	3478	2908	2768	2660	2598	2574	2212	2644	2298	1930	1604	4154	3728	3910	4730	3958	5946	2526	2266	2338	2620	2636	2576	113452	2371.33	507.844	3670.44	414.269	3109	638.632	2210.33	393.506	4404.33	830.237	2493.67	154.989
5.1.3.3	2426	1954	1896	3068	2550	3522	3222	3936	3486	3228	3324	3684	3656	2516	2104	2532	2766	2298	1878	1938	2438	3346	1456	1424	3952	3728	4016	4640	4608	5696	3592	3328	3396	3812	4260	3188	112864	2092	290.703	3335.56	395.699	2645.33	543.923	2080	722.717	4440	717.025	3596	391.371
2.1.1.45	3396	2512	2850	2830	2514	3144	3196	3582	3216	2912	3348	2990	4008	3276	2766	3454	4024	2878	2340	1946	2380	2234	2266	1874	3868	3848	3892	4052	3680	4960	3114	2850	2894	3128	3396	2988	112606	2919.33	446.06	3081.33	312.058	3401	538.844	2173.33	211.678	4050	461.28	3061.67	198.625
3.5.1.108	3184	2408	2604	2798	2780	3186	3112	3668	3064	3436	3694	3444	3884	2738	2332	3208	3858	2496	2208	1904	2046	2778	2506	2246	4088	3860	3932	4832	4196	5376	2572	2488	2728	2666	3186	2762	112268	2732	403.524	3242.44	340.316	3086	676.076	2281.33	316.715	4380.67	597.753	2733.67	243.519
2.7.7.60	2650	2028	2060	2856	2612	3062	3010	3652	2884	3444	3402	3340	3600	2354	2174	2504	2564	2328	2176	1872	2190	2910	1888	1612	3926	3668	4098	4456	4192	5378	4004	3420	3552	3954	4496	3604	111920	2246	350.24	3140.22	337.484	2587.33	514.884	2108	448.255	4286.33	596.166	3838.33	396.296
2.7.8.41	2956	2080	2380	3494	2922	3066	3504	3888	3144	3672	3714	3256	3796	2940	2556	2682	2530	2332	1892	1610	2034	2686	2070	1726	3404	3122	3354	3398	3592	4448	4196	3548	3652	4236	4394	3570	111844	2472	445.188	3406.67	327.164	2806	524.745	2003	378.269	3553	463.494	3932.67	382.741
1.3.1.14	3116	2310	2210	2464	2116	2456	2862	2864	2678	3068	3240	2876	3838	3022	2414	3068	2778	2464	2512	2158	2708	2944	2186	1880	3738	3364	3686	4604	3892	5194	3920	3670	3566	4212	3996	3578	111652	2545.33	496.735	2736	345.733	2930.67	521.246	2398	394.482	4079.67	683.487	3823.67	260.822
2.7.2.2	2684	2104	2264	2894	2570	2908	3146	3170	3390	3120	3328	3020	3554	3422	2550	2858	3030	2408	2550	2086	2476	2646	1714	1598	3730	3600	3600	4984	3694	5550	3394	3286	3186	3756	3872	3418	111560	2350.67	299.555	3060.67	249.042	2970.33	459.075	2178.33	448.636	4193	852.502	3485.33	270.178
1.8.3.1	2854	2098	2210	3812	3214	4030	4254	4524	3744	3958	4038	3952	4714	3458	2854	2960	2384	2802	2314	2002	2468	2738	2334	2002	4080	3668	3634	2970	3306	4188	2228	2266	2226	2414	2364	2470	111532	2387.33	408.007	3947.33	360.419	3195.33	819.781	2309.67	282.3	3641	459.385	2328	103.057
2.3.1.117	3060	2266	2244	2598	2594	3044	2882	3224	2530	3152	3086	3112	3602	2430	2548	2852	2786	2410	2198	1872	2530	3162	2274	2006	3616	3652	3728	2844	3672	4018	4238	3870	3876	4484	5160	3808	111428	2523.33	464.897	2913.56	271.378	2771.33	445.798	2340.33	461.927	3588.33	392.421	4239.33	521.911
2.3.2.6	2630	2052	2002	3062	2322	3058	2904	3714	2818	3210	3190	3312	3648	2436	2162	2268	2612	2166	2264	2074	2514	3488	2164	1828	3986	4030	4080	3660	3954	4942	3914	3568	3438	3998	4274	3592	111334	2228	349.039	3065.56	380.443	2548.67	565.678	2388.67	583.716	4108.67	433.987	3797.33	317.794
1.4.3.5	3414	2294	2396	2514	2118	2602	2484	3086	2332	2606	2838	2656	3418	2320	1964	2768	2808	2216	2704	2564	2834	4084	2542	2146	4208	3822	4084	3510	4178	5012	3830	3442	3624	3950	4440	3474	111282	2701.33	619.291	2581.78	277.945	2582.33	523.276	2812.33	664.544	4135.67	503.488	3793.33	373.671
5.3.1.13	3010	2318	2214	3358	2632	3326	3632	3974	3174	3588	3790	3520	3726	2640	2378	3074	3656	2726	2396	1982	2180	2706	2356	2066	3508	3168	3514	4236	4036	4930	2662	2576	2578	2872	3324	2780	110606	2514	432.685	3443.78	389.877	3033.33	556.378	2281	262.793	3898.67	637.301	2798.67	282.366
3.2.1.37	1514	1280	1420	2796	2536	3392	3320	3716	3580	3000	3454	3608	4152	2662	2360	3160	3822	2466	1516	1254	1726	2518	1470	954	5036	5060	5324	5844	6008	6754	2588	2404	2300	2428	2512	2530	110464	1404.67	117.751	3266.89	402.608	3103.67	744.702	1573	532.018	5671	665.333	2460.33	103.68
1.8.1.18	1190	1222	978	1558	1474	2074	2236	2012	2690	1982	2066	2190	2080	1546	1438	1476	1874	1508	2778	2654	2958	3140	1780	1210	4706	4588	4644	6956	5160	7426	5170	4506	4470	5560	5958	4608	109866	1130	132.605	2031.33	360.798	1653.67	261.226	2420	756.897	5580	1272.91	5045.33	620.731
3.5.1.25	2376	2040	1974	2804	2494	2880	3008	3306	2876	3324	3336	3026	3732	2610	2200	2690	2598	2352	2150	1984	2308	3148	1906	1496	3926	3900	3740	3822	4140	4596	3888	3390	3470	3840	4406	3322	109058	2130	215.583	3006	281.991	2697	539.384	2165.33	553.961	4020.67	312.094	3719.33	410.614
3.1.3.97	3202	2358	2376	2120	1672	2290	2418	2338	2844	2260	2556	2322	3360	2696	2390	3322	4092	2592	2662	2130	2448	2402	1762	1356	4432	4158	4524	5744	4412	6808	3130	2914	2820	3072	3814	3072	108868	2645.33	482.171	2313.33	317.058	3075.33	636.031	2126.67	488.378	5013	1041.66	3137	351.296
4.1.2.17	2538	2024	1862	3238	2784	3472	3522	3770	3494	3372	3716	3382	4096	3184	2398	2902	3098	2356	2120	1918	2366	2322	1804	1368	3972	3648	3864	4352	3688	5058	2692	2612	2690	2902	3030	2972	108586	2141.33	352.944	3416.67	289.389	3005.67	637.374	1983	372.792	4097	534.292	2816.33	173.433
3.5.4.13	2864	2142	2136	3460	2832	3098	3354	3690	2804	3268	3236	3134	4072	3012	2704	2988	2850	2714	2152	2018	2494	2904	2582	2176	2828	2912	2834	2462	2914	3314	3598	3576	3576	4002	4348	3446	108494	2380.67	418.59	3208.44	283.658	3056.67	514.221	2387.67	332.466	2877.33	272.043	3757.67	345.493
3.5.2.5	2674	2086	2068	4250	3744	4242	4236	5060	3760	4660	4802	4562	4512	3474	2742	2776	2388	2660	2246	1814	2150	2934	2498	2334	2492	2350	2528	2182	2450	2898	2492	2162	2432	2680	2772	2342	108452	2276	344.796	4368.44	446.708	3092	783.188	2329.33	373.836	2483.33	238.206	2480	222.657
2.3.1.247	2562	1848	2106	3382	2934	3278	3428	3854	3176	3290	3560	3186	3626	2568	2198	2312	2090	2188	2352	1924	2230	2516	2600	2294	3390	3320	3328	3694	3260	4630	3506	3328	3312	3776	3908	3262	108216	2172	361.547	3343.11	260.722	2497	576.964	2319.33	238.088	3603.67	525.688	3515.33	269.383
3.1.3.104	2024	1922	1500	1840	1792	2282	2108	2262	2426	2392	2482	2512	3502	2348	1770	2672	2762	1984	1918	1856	2440	3110	1610	1616	4062	3838	3922	4008	3832	5078	5202	4548	4696	5446	6048	4354	108164	1815.33	277.808	2232.89	266.966	2506.33	620.363	2091.67	583.489	4123.33	476.503	5049	638.381
3.4.21.66	1694	1482	1556	2426	2234	2904	3020	3216	3094	3154	3368	3016	4236	3224	2654	3082	3156	2266	2406	1850	2372	2908	1672	1404	3608	3350	3680	3520	3414	4294	3954	3698	3866	4180	4146	3798	107902	1577.33	107.598	2936.89	371.633	3103	663.89	2102	556.877	3644.33	340.53	3940.33	192.06
3.4.11.4	2622	1882	2004	2566	2382	2804	2874	3478	3246	3102	3204	3102	4794	3446	2934	3784	4074	2938	1912	1716	2250	2146	1526	1186	3538	2860	3112	5924	4268	5588	2744	2346	2532	2744	3234	2744	107606	2169.33	396.738	2973.11	348.118	3661.67	716.501	1789.33	398.298	4215	1289.93	2724	297.001
1.1.9.1	3994	2426	2842	3602	3262	3698	3746	4254	2964	3534	3772	3608	3178	2392	2042	2144	2016	1858	2020	1760	2038	3176	2320	2434	3270	3454	3506	2400	3550	3222	3408	3198	3372	2888	3102	3026	107476	3087.33	812.279	3604.44	355.529	2271.67	477.797	2291.33	494.758	3233.67	428.774	3165.67	201.496
1.14.15.29	1384	1018	1064	5444	4638	4912	5302	5786	4046	5400	5378	5320	2680	2380	1792	1674	778	2214	1530	1594	1962	2082	1640	1588	3082	3068	3386	2210	2942	3076	3096	2784	2872	3100	3394	2856	107472	1155.33	199.362	5136.22	523.607	1919.67	671.818	1732.67	229.976	2960.67	396.056	3017	226.492
1.2.1.8	2260	2034	1802	2722	2462	2972	3214	3284	3132	3272	3286	3310	3802	2814	2184	2354	1874	2480	1576	1468	1850	2052	1272	946	2666	2574	2798	2134	2554	2924	5772	4852	5088	6030	6694	4932	107440	2032	229.007	3072.67	299.112	2584.67	672.939	1527.33	397.095	2608.33	271.318	5561.33	730.783
1.1.1.262	3064	2330	2556	2884	2496	2822	3370	3296	2996	3096	3440	3058	3448	2594	2210	2894	3348	2494	2514	2098	2474	3350	2536	2040	3874	3418	3798	4072	4162	4698	2646	2534	2592	2594	2882	2682	107360	2650	375.92	3050.89	297.187	2831.33	491.391	2502	468.583	4003.67	427.541	2655	122.205
1.8.1.7	2830	2124	2128	3260	2700	3240	3330	3882	2988	2912	3154	3024	3060	2348	2266	2836	2842	2628	2928	2136	2556	3520	3174	2632	3782	3646	3868	2952	3740	4242	2860	2478	2752	2862	2970	2646	107296	2360.67	406.46	3165.56	333.078	2663.33	309.075	2824.33	489.85	3705	422.512	2761.33	177.244
3.1.6.14	1754	1992	1434	3018	2728	3212	3196	3522	3166	3368	3648	3190	3856	2644	2340	2430	2252	2180	1992	1910	2356	2862	1796	1436	3956	3820	4356	4050	4474	5130	3362	2968	3120	3290	3402	3006	107216	1726.67	280.002	3227.56	269.977	2617	627.972	2058.67	493.357	4297.67	476.133	3191.33	185.773
2.7.7.3	2930	2260	2302	2954	2544	2946	3008	3382	2892	3058	3468	2796	3696	2790	2164	2984	3116	2550	2212	1910	2362	2712	1822	1678	3394	3238	3282	3648	3548	4464	3468	3122	2994	3630	3844	3442	106610	2497.33	375.288	3005.33	281.595	2883.33	521.911	2116	386.177	3595.67	452.989	3416.67	315.239
3.5.4.33	2556	2132	2236	2588	2364	2962	2976	3266	2968	2628	3000	3010	3366	2570	2194	2234	2498	2100	2456	1920	2550	2870	2094	1678	3920	3638	3774	4176	3896	5404	3612	3050	3158	3414	3958	3204	106420	2308	220.98	2862.44	277.541	2493.67	464.545	2261.33	441.924	4134.67	646.949	3399.33	339.406
3.1.6.4	2178	1970	1746	3044	2586	3088	3060	3888	3062	3084	2982	2838	2844	2250	1956	1984	2060	1646	2726	2416	2850	2746	2294	1862	4692	4970	5008	3762	4778	4938	2974	2768	2908	2740	2656	2868	106222	1964.67	216.049	3070.22	347.546	2123.33	403.653	2482.33	371.148	4691.33	471.158	2819	118.117
3.5.3.6	2862	2056	2318	1788	1540	1948	1892	1944	2090	1574	1804	1670	3872	2780	2412	2930	3414	2462	1522	1736	2022	2904	1598	1432	3630	3652	3690	3834	4008	4586	5110	4598	4372	5496	5912	4604	106062	2412	411.14	1805.56	183.937	2978.33	568.762	1869	547.201	3900	364.725	5015.33	600.209
4.1.1.98	3234	2644	2542	3972	3480	3564	3896	4392	3544	3836	4372	3430	3492	2976	2450	2652	2872	2422	2426	1832	2414	1848	2526	1778	2924	2934	2880	2872	2862	3456	2616	2536	2558	2622	2212	2496	105562	2806.67	373.579	3831.78	365.58	2810.67	400.407	2137.33	351.283	2988	231.098	2506.67	152.114
3.5.1.3	2374	2034	2118	2074	1882	2314	2312	2408	2636	2264	2514	2320	3482	2692	2196	3380	4296	2470	2514	2174	2468	2658	1754	1582	4564	4050	4046	5198	4222	6044	3266	3018	2876	3182	3172	2984	105538	2175.33	177.103	2302.67	223.083	3086	778.992	2191.67	438.471	4687.33	793.798	3083	147.028
3.5.1.87	2904	1942	2226	3750	3268	3780	3864	4516	3424	3790	3818	3804	3540	2744	2060	2000	1714	2200	2872	2206	2996	3218	2848	2402	3262	3000	3188	2752	3606	3854	2354	2110	2258	2306	2730	2090	105396	2357.33	494.264	3779.33	342.901	2376.33	663.441	2757	379.677	3277	400.417	2308	232.134
2.1.1.171	2882	2022	2108	2550	2134	2644	2692	2908	2730	2670	2966	2834	3616	2578	2062	2784	2908	2142	2090	1820	2338	2634	1876	1460	3802	3732	3770	4266	3714	5282	3620	3400	3212	3708	4206	3216	105376	2337.33	473.651	2680.89	244.066	2681.67	569.324	2036.33	413.704	4094.33	617.513	3560.33	376.26
3.2.1.18	2176	1910	1732	2242	1666	2252	2272	2676	2406	2134	2190	2062	5092	4002	2950	3550	4416	2724	1912	1900	2634	2632	1730	1230	3084	2684	3012	4662	4118	4814	4078	3508	3520	3630	3828	3934	105362	1939.33	223.449	2211.11	270.696	3789	897.95	2006.33	544.919	3729	918.823	3749.67	233.832
2.5.1.147	2268	1562	1630	3456	3220	3488	3240	3770	2714	3708	3368	3254	2730	2202	1960	2138	1528	2212	2266	1994	2766	3430	2320	2002	3136	3146	3346	2166	3296	3342	3942	3710	3810	4052	4492	3660	105324	1820	389.466	3357.56	311.722	2128.33	390.707	2463	551.115	3072	453.555	3944.33	305.07
2.1.1.33	2614	2202	1982	2362	1780	2282	2208	2840	2230	2006	2100	2236	3864	2484	2356	2872	3376	2106	2020	1792	2340	3072	1924	1592	3870	3906	3758	4046	3978	4796	4040	3674	3780	4280	4584	3748	105100	2266	320.824	2227.11	287.717	2843	668.818	2123.33	527.147	4059	374.067	4017.67	357.033
2.5.1.105	1860	1502	1500	2798	2374	3000	3120	3666	3110	3348	3512	3122	2870	2358	1806	2310	2366	2110	2378	2130	2404	2038	1788	1318	5010	4756	5024	6786	4836	7564	2020	2070	1896	1994	2260	2092	105096	1620.67	207.271	3116.67	383.792	2303.33	350.083	2009.33	408.409	5662.67	1201.35	2055.33	121.528
4.1.2.22	1554	1296	1308	3554	3216	3654	3532	4284	3272	4274	4032	4140	3212	2370	2164	2294	1776	2758	1480	1266	1518	2158	1758	1374	3600	3592	3642	3040	3120	3934	3600	3304	3256	4036	4212	3346	104926	1386	145.616	3773.11	417.634	2429	497.93	1592.33	322.407	3488	341.21	3625.67	407.714
4.1.2.9	1554	1296	1308	3554	3216	3654	3532	4284	3272	4274	4032	4140	3212	2370	2164	2294	1776	2758	1480	1266	1518	2158	1758	1374	3600	3592	3642	3040	3120	3934	3600	3304	3256	4036	4212	3346	104926	1386	145.616	3773.11	417.634	2429	497.93	1592.33	322.407	3488	341.21	3625.67	407.714
1.14.19.1	3348	2222	2416	3358	3030	3328	3144	4114	2624	3686	3644	3406	4130	3054	2700	2668	2294	2154	2068	1604	1814	2506	2430	2204	3222	3002	2992	2434	3142	3164	3110	2848	2930	3110	3740	3132	104772	2662	601.96	3370.44	426.448	2833.33	710.989	2104.33	350.221	2992.67	288.598	3145	313.394
3.1.4.54	2464	1870	1958	2414	2106	2574	2656	3092	2820	2664	2784	2554	3260	2582	2112	2414	2406	2192	2420	2148	2712	1726	1756	1282	4318	3772	3974	5586	4362	6104	3154	2794	3034	3084	4124	3050	104322	2097.33	320.577	2629.33	275.053	2494.33	411.284	2007.33	520.588	4686	938.452	3206.67	465.612
1.8.1.2	2228	1986	1794	4188	3708	4266	4146	5400	3458	4304	4004	4452	4844	3232	2728	2994	3028	2826	1554	1220	1608	2062	2142	2254	1922	2026	1938	1514	2170	2250	2342	1994	2494	2956	5186	2674	103892	2002.67	217.48	4214	542.104	3275.33	787.958	1806.67	406.26	1970	257.992	2941	1146.03
2.7.7.75	2730	2188	2190	2666	2516	3056	3152	3312	3172	3070	3506	2994	3692	2860	2462	2714	3026	2184	2316	1868	2162	2242	1806	1494	4128	3756	3720	3780	3504	5068	2842	2610	2502	2728	2856	2786	103658	2369.33	312.348	3049.33	303.737	2823	519.281	1981.33	314.219	3992.67	563.744	2720.67	139.586
2.3.3.10	1938	1740	1606	2514	2028	2570	2724	2710	2842	2792	2924	2422	3244	2728	2292	2542	2574	2238	2536	2196	2872	3176	2286	2152	4060	3668	3882	4538	3912	5284	2944	2790	2686	3100	3328	2808	102646	1761.33	167.025	2614	272.323	2603	363.597	2536.33	411.838	4224	595.405	2942.67	236.879
1.13.11.18	2976	2112	2204	3302	2656	3234	3354	3706	2740	3388	3250	3040	3232	2320	2022	2462	2402	2076	2276	1882	2198	3018	2506	2276	3648	3516	3732	2554	3070	3420	2930	2600	2790	3008	3626	3090	102616	2430.67	474.507	3185.56	327.951	2419	435.469	2359.33	380.294	3323.33	441.573	3007.33	348.918
3.1.3.73	1666	1348	1256	2266	1854	2414	2408	2488	2546	2390	2510	2576	3076	2220	1922	2070	1662	1844	1772	1816	2572	2964	1630	1192	4320	3840	4216	3202	3898	4302	4758	4226	4186	5028	5654	4448	102540	1423.33	215.131	2383.56	219.697	2132.33	500.133	1991	652.932	3963	425.407	4716.67	560.673
2.4.1.64	1080	1186	814	3536	3278	4254	3688	4182	3860	3884	3696	4598	3208	2082	1840	1782	1216	2196	2304	2166	2702	3572	2376	1810	3924	4086	4302	3230	4348	4594	2148	1926	1994	2244	2510	1898	102514	1026.67	191.649	3886.22	402.823	2054	659.498	2488.33	605.082	4080.67	475.852	2120	232.833
3.4.17.19	2514	2082	2092	3194	2762	3098	3234	3432	3138	2990	3228	3070	4982	3456	2686	3728	3690	2688	2102	2006	2472	2076	1680	1358	3094	2750	3056	3126	2572	3698	2720	2698	2568	2856	2832	2714	102442	2229.33	246.579	3127.33	185.529	3538.33	848.465	1949	384.177	3049.33	386.299	2731.33	103.82
3.4.24.70	3522	2740	2710	2446	2150	2432	2578	2772	2282	2380	2374	2356	3574	2760	2270	2510	2554	1860	2446	1976	2434	3796	3072	2708	3536	3650	3558	2892	3756	3770	3154	2902	2964	3012	3612	2892	102400	2990.67	460.393	2418.89	176.576	2588	572.735	2738.67	630.895	3527	325.848	3089.33	273.161
2.5.1.9	2856	2148	2206	2672	2244	2652	2714	3128	2410	2796	2716	2812	2880	2222	2044	2326	2656	1990	2286	1998	2430	3062	2362	1870	3566	3372	3264	3848	3732	4906	3466	3262	3074	3520	3832	3070	102392	2403.33	393.092	2682.67	249.453	2353	350.622	2334.67	417.247	3781.33	592.167	3370.67	294.767
4.3.1.32	2202	1502	1608	3382	3118	3358	3110	3692	2586	3540	3294	3184	2616	2142	1830	1782	1204	2040	2128	1920	2656	3386	2224	1922	3120	3122	3312	2144	3240	3292	3916	3666	3780	4028	4416	3628	102090	1770.67	377.287	3251.56	314.79	1935.67	466.139	2372.67	565.171	3038.33	445.738	3905.67	291.837
1.3.1.76	1830	1490	1520	3020	2710	3356	3266	3710	3128	3112	3176	3326	2808	2102	2008	2250	2162	2314	1828	1370	1954	1788	1768	1526	3478	3468	3544	3440	3114	4374	3714	3350	3340	3998	5222	3462	102026	1613.33	188.237	3200.44	271.724	2274	282.919	1705.67	215.523	3569.67	422.089	3847.67	718.804
4.6.1.17	2798	2054	2112	2584	2180	2954	2920	3140	2758	2956	3034	3006	3594	2638	2144	2780	2752	2434	2160	1648	1926	2444	1720	1446	3616	3416	3656	3276	3186	4290	3590	3060	3102	3578	3702	3320	101974	2321.33	413.823	2836.89	294.919	2723.67	487.589	1890.67	364.886	3573.33	396.347	3392	271.812
1.14.19.45	3460	2768	2698	3880	3052	3724	3776	4196	3678	3436	3786	3334	3646	2674	2104	2690	2440	2398	2220	1778	2356	2632	2266	1962	3078	3000	2984	2602	2908	3638	2142	1952	1964	2008	2378	2226	101834	2975.33	421.19	3651.33	334.456	2658.67	529.048	2202.33	300.137	3035	338.497	2111.67	169.098
1.14.19.23	3460	2768	2698	3880	3052	3724	3776	4196	3678	3436	3786	3334	3646	2674	2104	2690	2440	2398	2220	1778	2356	2632	2266	1962	3078	3000	2984	2602	2908	3638	2142	1952	1964	2008	2378	2226	101834	2975.33	421.19	3651.33	334.456	2658.67	529.048	2202.33	300.137	3035	338.497	2111.67	169.098
5.5.1.27	1602	1334	1288	3334	2504	2908	2896	3488	2758	2950	3090	2728	3966	2664	2284	2510	2370	2196	2388	1986	2718	2500	2158	1984	4136	3904	3994	4046	4330	5226	2518	2418	2320	2608	2932	2670	101706	1408	169.576	2961.78	305.163	2665	658.601	2289	296.769	4272.67	489.031	2577.67	214.683
1.14.99.50	1838	1844	1456	3338	2886	3012	3226	3434	2784	3442	3426	3366	2856	2456	2020	2320	2072	2000	2000	1810	2472	3130	2398	2292	4012	3778	3984	3272	3868	4552	2806	2606	2508	2820	3020	2560	101664	1712.67	222.3	3212.67	254.27	2287.33	332.654	2350.33	456.739	3911	413.345	2720	195.415
3.2.1.177	1384	1456	1254	2126	2126	2704	2558	2866	3062	2762	2918	3152	3628	2912	2126	3280	3450	2752	1654	1610	2350	1884	1184	1094	4666	4282	4184	5990	4992	6620	2424	2300	2242	2486	2726	2398	101602	1364.67	102.378	2697.11	369.684	3024.67	548.59	1629.33	462.623	5122.33	980.582	2429.33	169.737
4.2.1.113	2378	1706	1920	2052	2052	2478	2396	2686	2648	2488	2744	2682	3720	2974	2254	2390	2290	2144	1936	1836	2180	2720	1638	1244	3320	3330	3430	3070	3420	4056	4376	3878	3598	4502	4762	3846	101144	2001.33	343.304	2469.56	263.076	2628.67	609.458	1925.67	500.244	3437.67	329.643	4160.33	451.661
1.5.1.40	1536	1270	1092	2528	2366	2882	2728	2960	2888	2882	2922	2762	3402	2610	2324	2608	2316	2364	1808	1706	2404	2706	1656	1506	3438	3300	3420	2874	3588	4002	4348	3808	3706	4382	4378	3578	101048	1299.33	223.449	2768.67	200.564	2604	413.715	1964.33	477.429	3437	368.254	4033.33	375.401
1.1.1.53	1372	1184	1186	3360	2682	3394	3068	3564	2984	3450	3264	3332	3008	2132	1988	1764	1312	2122	2014	1822	2344	3060	1742	1644	3834	3942	3914	3204	3964	4530	3126	3034	2986	3322	4188	3180	101016	1247.33	107.969	3233.11	274.383	2054.33	558.542	2104.33	529.491	3898	422.304	3306	447.848
5.3.3.8	2646	2032	2018	2296	2106	2412	2520	3024	2288	2460	2628	2516	3486	2456	2134	2576	2508	1944	2292	1776	2440	2672	2096	1852	3372	2984	3188	3700	3734	4498	3518	3196	3506	3724	4698	3600	100896	2232	358.603	2472.22	258.798	2517.33	533.153	2188	346.318	3579.33	535.347	3707	515.958
5.4.4.2	1870	1540	1520	1836	1586	2002	1872	1912	1802	1932	1724	2056	3426	2358	1884	2510	2614	1812	2242	2080	2582	3350	1852	1536	4136	4070	4222	3428	4320	4736	4504	3870	4056	4564	5080	3786	100670	1643.33	196.554	1858	143.217	2434	586.072	2273.67	634.67	4152	425.52	4310	495.529
2.7.1.221	3230	2326	2424	2854	2546	2846	3146	3520	2894	3546	3232	3322	3396	2412	2138	2262	2404	2132	2234	1686	2090	2292	1992	1860	3484	3406	3598	3706	3418	4430	2478	2472	2262	2646	3104	2584	100372	2660	496.06	3100.67	338.844	2457.33	475.808	2025.67	229.097	3673.67	387.762	2591	283.342
3.5.1.32	3174	2214	2396	2524	2304	2584	2500	3218	2378	2410	2718	2750	4876	3066	3030	3410	3272	2708	1756	1488	1792	2744	1680	1632	3284	3000	3142	3512	3690	4628	2866	2478	2562	2920	3086	2558	100350	2594.67	509.903	2598.44	275.535	3393.67	764.479	1848.67	451.419	3542.67	586.946	2745	245.477
2.5.1.3	1932	1732	1576	3382	3080	3566	3516	4332	3086	3742	4234	3472	3086	2406	1938	2604	2640	2350	2320	1830	2060	2044	2276	1720	3398	3056	3184	3984	3408	4610	2180	1980	2154	2314	2808	2258	100258	1746.67	178.453	3601.11	442.246	2504	379.709	2041.67	237.063	3606.67	585.483	2282.33	281.52
1.7.2.6	2362	2328	2180	2038	1968	2598	2620	2738	3006	2894	3288	2434	2668	2340	2108	2054	2026	2124	3070	2598	2782	1620	1998	1636	4360	4346	4326	3926	3212	4718	2974	2806	2830	3126	2888	3106	100096	2290	96.7678	2620.44	430.57	2220	245.787	2284	617.575	4148	522.707	2955	137.636
2.7.8.8	2740	2268	2054	2614	2274	2710	2820	3350	2812	3094	3338	3054	3170	2480	2110	2654	3254	2396	2032	1558	1820	2044	1970	1598	3246	3140	3294	4250	3726	4780	2676	2640	2730	2922	3576	2720	99914	2354	350.993	2896.22	349.908	2677.33	450.725	1837	216.247	3739.33	654.957	2877.33	355.936
2.1.1.334	2316	1784	1852	3130	2766	3702	3774	4284	3744	3734	4134	3606	3374	2500	1980	3006	3120	2756	1790	1542	1808	1580	1498	1256	3378	3026	3274	3364	3114	4566	2312	2250	2266	2308	2560	2382	99836	1984	289.524	3652.67	464.208	2789.33	497.587	1579	204.559	3453.67	562.424	2346.33	114.287
7.1.1.6	2692	1966	2318	3188	2840	3494	3792	3702	3758	3856	4088	3678	3720	2950	2424	2408	2248	2474	1736	1588	1902	2298	1486	1292	3006	3028	3108	2764	2928	3914	2612	2338	2422	2540	2616	2352	99526	2325.33	363.056	3599.56	377.587	2704	551.294	1717	352.923	3124.67	403.859	2480	126.041
4.1.3.38	2152	2262	1862	2486	2244	2896	2738	2874	2968	2768	2834	2940	3278	2500	2322	2498	2364	2028	2088	1802	2146	3040	2008	1620	4028	3794	3924	2786	3360	4004	3220	2796	2910	3098	3770	3056	99464	2092	206.64	2749.78	238.11	2498.33	419.103	2117.33	492.286	3649.33	488.796	3141.67	341.567
3.1.4.58	2278	1862	1920	2502	2064	2684	2554	2774	2616	2722	2796	2450	3018	2326	2116	2378	2528	2244	2134	1824	2230	2498	1954	1640	3766	3556	3618	4010	3734	4938	3258	3000	3062	3586	3698	2988	99326	2020	225.309	2573.56	225.308	2435	316.831	2046.67	306.1	3937	514.724	3265.33	309.432
4.4.1.11	4440	2700	3144	1674	1598	1816	2098	2238	2182	2150	2350	2090	4000	3222	2718	3792	4492	2814	1794	1468	1818	2060	1936	1342	3202	2986	3032	4324	3494	4824	2998	2650	2702	3270	3026	2816	99260	3428	904.097	2021.78	262.188	3506.33	704.058	1736.33	276.45	3643.67	758.969	2910.33	232.594
2.7.1.130	2778	2232	2324	2268	1998	2592	2588	2988	2364	2890	2938	2732	3386	2420	2104	2882	3540	2082	2206	1678	2060	2310	2024	1636	3788	3608	3700	4728	3920	5030	2724	2332	2266	2596	2940	2544	99196	2444.67	292.317	2595.33	334.411	2735.67	635.174	1985.67	274.831	4129	597.67	2567	249.389
2.8.5.2	2990	2172	2248	2586	2336	2690	2988	3258	2772	2878	2998	2972	3600	2622	2192	2914	2424	2006	2166	1774	2180	2594	2172	1666	3940	3796	3800	2512	3084	3594	2896	2714	2690	3110	2984	2812	99130	2470	451.934	2830.89	270.502	2626.33	573.619	2092	332.934	3454.33	550.77	2867.67	162.074
5.6.1.9	2252	1892	2034	2114	2012	2712	2736	2756	3086	3110	3514	2864	1932	2168	1620	1994	2454	2252	2842	2392	2548	1554	1968	1414	4110	3590	3794	8390	4630	8426	1688	1654	1428	1686	1676	1790	99082	2059.33	181.332	2767.11	472.674	2070	288.965	2119.67	569.271	5490	2287.38	1653.67	120.196
2.1.1.10	2700	2046	1958	2582	2426	3006	2950	3406	2730	2824	2810	2852	4316	2788	2276	2714	2484	1958	1932	1856	2238	2246	2078	1856	3454	3396	3442	2660	3308	3772	3056	2598	2928	3126	3532	2736	99040	2234.67	405.385	2842.89	276.427	2756	821.897	2034.33	180.148	3338.67	367.851	2996	328.154
2.6.1.62	2062	1942	1738	3122	2714	3308	3028	3764	2890	3376	3284	3466	3176	2540	2076	2378	2460	2216	2100	1680	2074	2116	2044	1642	2962	3076	3140	2924	3156	3670	3022	2794	2958	3136	3904	3074	99012	1914	163.805	3216.89	317.006	2474.33	382.502	1942.67	219.868	3154.67	269.184	3148	388.445
2.5.1.39	3214	2330	2242	2896	2488	2912	3004	3688	2838	3390	3668	3088	3676	2478	2098	2490	2746	2164	2276	1828	2102	2590	2176	1858	3208	2914	3168	3066	3068	3688	2510	2386	2478	2566	2898	2498	98688	2595.33	537.585	3108	400.219	2608.67	574.06	2138.33	283.05	3185.33	266.502	2556	177.498
2.1.1.226	2140	1784	1698	2586	2344	2934	2864	3222	2908	3030	3218	3038	2960	2512	2080	2394	2318	2042	2112	1988	2312	2288	1634	1294	3330	2972	3300	3582	3078	4770	3408	3274	2952	3560	3560	3136	98622	1874	234.342	2904.89	285.216	2384.33	335.26	1938	400.576	3505.33	655.015	3315	242.565
2.1.1.227	2140	1784	1698	2586	2344	2934	2864	3222	2908	3030	3218	3038	2960	2512	2080	2394	2318	2042	2112	1988	2312	2288	1634	1294	3330	2972	3300	3582	3078	4770	3408	3274	2952	3560	3560	3136	98622	1874	234.342	2904.89	285.216	2384.33	335.26	1938	400.576	3505.33	655.015	3315	242.565
1.1.2.3	2440	1808	1794	3282	2916	3598	3428	4102	2888	3542	3340	3712	2940	1942	1766	2032	2044	1914	2268	1806	2358	3674	2522	2348	3528	3604	3806	2714	3782	3824	2304	1808	1964	1912	2822	2034	98566	2014	368.993	3423.11	380.693	2106.33	420.532	2496	625.682	3543	423.424	2140.67	373.212
3.5.1.97	3562	2692	2852	2076	1788	2220	2238	2486	1884	2030	2192	1980	3476	2956	2388	3088	3068	2352	2366	2192	2864	3520	2338	1974	3196	2888	3024	3524	4230	4058	2886	2716	2552	2784	2688	2650	97778	3035.33	463.069	2099.33	210.587	2888	438.193	2542.33	561.762	3486.67	554.492	2712.67	114.449
4.1.1.15	644	1066	504	2520	2288	2738	2492	2814	2640	2768	2522	2606	1952	1618	1346	1338	1086	1426	2364	2132	2868	2380	1956	1524	4470	4222	4190	3718	4170	5072	4204	3704	3912	4038	4346	4046	97684	738	292.554	2598.67	164.384	1461	295.274	2204	453.114	4307	446.855	4041.67	223.533
2.4.1.345	1734	1374	1248	2744	2300	2634	2762	2856	2738	3274	3342	3056	3746	2692	2282	2286	1798	2168	1584	1498	2198	2382	1282	1040	3256	3040	3584	2574	2984	3960	3922	3424	3662	4014	4374	3620	97432	1452	252.214	2856.22	324.931	2495.33	676.106	1664	523.438	3233	486.989	3836	339.175
3.6.1.22	1724	1554	1552	1966	1758	2194	2474	2616	2322	2180	2180	2200	3252	2098	1928	2362	2240	1886	2092	1748	2318	2748	2014	1602	3688	3640	3806	3378	3762	4500	4044	3550	3632	3954	4842	3614	97418	1610	98.732	2210	253.247	2294.33	502.82	2087	411.286	3795.67	376.19	3939.33	485.356
4.3.1.17	3310	2798	2624	1452	1292	1808	1432	1842	1800	1598	1552	1802	4226	3036	2734	3634	4500	2346	2130	1914	2314	2844	1946	1832	3462	3490	3466	3364	3528	4374	3266	2818	3172	3102	3292	3270	97370	2910.67	356.608	1619.78	201.994	3412.67	852.413	2163.33	375.846	3614	376.266	3153.33	179.424
1.14.11.18	2136	2020	1732	3516	2812	3270	3036	3478	2558	2794	2906	2640	3438	2352	2114	2674	2150	2018	2270	2000	2650	3588	2954	2680	2952	2888	2894	2136	3444	3304	2614	2342	2560	2768	3038	2638	97364	1962.67	208.013	3001.11	350.09	2457.67	533.871	2690.33	553.227	2936.33	455.59	2660	231.634
3.1.21.10	2404	2020	2066	2350	2250	2490	2596	2906	2654	2574	2676	2714	3274	2638	2152	2618	2970	2254	1874	1670	1958	2556	1738	1680	3468	3222	3470	3794	3406	4628	2936	2754	2894	3202	3444	2952	97252	2163.33	209.689	2578.89	196.566	2651	423.735	1912.67	334.95	3664.67	506.789	3030.33	249.227
6.3.2.3	2598	2090	2038	2756	2184	2518	2534	2838	2472	2580	2908	2444	3350	2252	2124	2374	2702	2036	2522	1988	2512	3132	2652	2284	3620	3438	3738	3296	3392	3968	2698	2494	2540	2516	2848	2656	97092	2242	309.399	2581.56	223.058	2473	488.463	2515	382.258	3575.33	250.256	2625.33	135.857
3.4.21.105	2506	2144	1792	2156	1928	2522	2548	2692	2502	2514	2666	2746	3322	2600	2224	2302	1840	1912	1972	1684	2318	2768	1712	1318	3120	3012	2864	3098	3182	4126	3676	3416	3414	3948	4990	3472	97006	2147.33	357.012	2474.89	266.404	2366.67	543.275	1962	515.944	3233.67	450.787	3819.33	609.126
2.3.1.129	2980	2284	2406	2616	2172	2550	2508	3174	2268	3122	3254	2820	3140	2380	1854	2152	2798	1932	2046	1790	2068	2484	2230	1858	3744	3404	3406	4138	3540	4566	2362	2286	2466	2516	3068	2446	96828	2556.67	371.658	2720.44	395.623	2376	506.279	2079.33	253.139	3799.67	465.572	2524	278.688
3.4.24.84	2564	2080	2220	1916	1664	2250	2506	2460	3016	2394	2808	2624	3548	2432	2058	2664	3180	2116	2204	1870	2032	1748	1366	1052	4000	3874	3832	4812	3822	5782	2504	2608	2632	2666	2608	2452	96364	2288	249.062	2404.22	419.711	2666.33	594.818	1712	430.358	4353.67	795.006	2578.33	82.233
5.1.3.22	2354	1982	1938	2474	2006	2436	2572	3386	2708	2880	3146	2684	4166	3158	2398	2538	2602	2068	1782	1688	2076	2334	1690	1266	3500	3192	3524	4312	3870	5258	2550	2294	2160	2408	2492	2460	96352	2091.33	228.537	2699.11	406.358	2821.67	747.874	1806	366.399	3942.67	749.203	2394	143.7
4.1.3.36	2280	1734	1750	2390	2296	2502	2444	2692	2128	2628	2536	2516	3146	2238	2134	2144	1826	1816	1682	1652	2100	2600	1552	1450	3086	2822	3202	2612	3250	3818	4058	3942	3814	4574	4980	3872	96266	1921.33	310.717	2459.11	171.389	2217.33	487.726	1839.33	433.716	3131.67	414.255	4206.67	467.187
3.1.13.3	2502	2042	2048	2614	2188	2452	2626	2930	3060	2960	3338	2880	3700	2914	2136	2686	3512	2332	1728	1680	2018	1954	1418	1064	3508	3054	3070	4836	3420	5344	2354	2292	2130	2456	2608	2326	96180	2197.33	263.866	2783.11	347.113	2880	626.81	1643.67	355.472	3872	974.188	2361	160.891
3.2.1.155	4082	2248	3082	1808	1696	2004	2270	2542	2024	2482	2552	2074	2978	2296	1838	2506	2958	2234	1800	1702	1978	2400	1800	1382	3750	3610	3370	5328	5154	5368	2542	2410	2336	2408	2526	2320	95858	3137.33	918.251	2161.33	317.172	2468.33	443.37	1843.67	336.027	4430	945.391	2423.67	93.1014
2.3.1.267	1758	1578	1218	2730	2166	2762	2724	3010	2854	2532	2766	2974	3892	2658	2386	3102	2824	2604	1754	1528	1938	2326	1614	1308	3332	2944	3250	3092	3264	4326	3006	2854	2778	3504	3690	2784	95830	1518	274.955	2724.22	253.147	2911	536.711	1744.67	354.996	3368	489.847	3102.67	396.022
3.6.1.54	2644	2046	2050	2750	2548	2922	3034	3558	2832	3150	3496	2946	3364	2268	1870	2848	3390	2110	1842	1602	1706	2372	1768	1490	3360	3060	3038	3720	3276	4244	2412	2126	2368	2320	2848	2270	95648	2246.67	344.107	3026.22	331.451	2641.67	654.539	1796.67	307.911	3449.67	461.206	2390.67	244.837
4.1.2.52	2282	1546	1678	4236	3572	3858	3936	4504	3452	3998	3918	3670	3534	2576	2046	2026	1762	1930	1860	1418	1870	2008	1748	1570	2998	2950	3050	2596	3156	3716	1986	1880	1872	2046	2404	1938	95590	1835.33	392.415	3904.89	326.281	2312.33	657.869	1745.67	217.062	3077.67	365.792	2021	198.751
4.2.1.22	3054	2204	2354	3042	2412	2572	2810	2980	2544	3112	3076	2880	3960	2898	2562	3370	3196	2710	2088	1784	2308	2862	2650	2452	2190	2020	2104	2482	3198	2970	2664	2232	2434	2546	2570	2284	95574	2537.33	453.689	2825.33	258.184	3116	510.397	2357.33	388.069	2494	488.166	2455	170.058
6.2.1.48	2494	1610	1760	3836	3536	4034	4174	4472	3728	4314	4664	4138	3080	2124	1668	1892	1422	1712	1600	1494	1842	1734	1628	1450	3066	2972	3056	2518	2996	3546	2094	2136	1960	2218	2240	2060	95268	1954.67	473.06	4099.56	360.508	1983	586.337	1624.67	146.553	3025.67	327.041	2118	104.031
2.1.1.74	2352	1750	1930	3142	2712	3302	3240	3758	3278	3464	3806	3224	3392	2878	2232	2690	2728	2494	1928	1658	2008	2080	2016	1660	2752	2634	2658	2972	2824	3678	2300	2130	2182	2284	2730	2172	95038	2010.67	309.001	3325.11	329.316	2735.67	391.218	1891.67	186.575	2919.67	391.19	2299.67	221.072
4.2.1.44	2516	1796	2072	2592	2354	2822	3086	3676	3048	3084	3040	3466	4486	3282	2602	2978	2802	2378	1388	1296	1574	2062	1224	918	3092	2764	3004	3438	2972	3820	2534	2308	2338	2874	2800	2486	94972	2128	363.252	3018.67	403.859	3088	751.829	1410.33	385.263	3181.67	382.41	2556.67	234.55
1.8.5.6	3262	2296	2562	2040	1798	2028	1968	2440	1780	1872	2116	1986	3148	2366	2186	2354	2778	2288	2310	1814	2006	2896	2848	2228	3598	3402	3932	2340	3256	2988	3370	3150	3228	3550	3454	3094	94732	2706.67	498.984	2003.11	198.797	2520	368.13	2350.33	440.053	3252.67	548.83	3307.67	179.379
6.3.2.45	3218	2208	2488	1828	1768	2230	2328	2404	2356	2532	2672	2314	2972	2238	2044	2232	3086	1718	2430	1938	2018	2356	2178	1810	3888	3706	3682	4454	3908	4938	2432	2196	2294	2314	2622	2304	94104	2638	521.44	2270.22	297.882	2381.67	537.046	2121.67	242.805	4096	497.842	2360.33	148.547
2.3.1.41	2288	1938	1624	2726	2524	2772	2756	3252	2724	2872	3214	3040	3114	2244	2130	3376	3978	2694	1578	1098	1550	1994	1950	1654	3126	3234	3194	3118	3560	3910	2326	2050	2184	2558	3276	2366	93992	1950	332.163	2875.56	244.247	2922.67	706.689	1637.33	324.739	3357	315.974	2460	435.093
4.2.1.18	2326	1826	1766	2978	2424	2792	2728	3014	2534	2870	2566	2606	2970	2346	1798	2482	2692	1984	1610	1510	2032	2472	1766	1484	3002	2996	3134	2794	3282	3746	3250	3026	3118	3462	3632	2864	93882	1972.67	307.463	2723.56	206.021	2378.67	436.471	1812.33	380.974	3159	330.081	3225.33	284.188
3.1.1.23	2238	1522	1742	1844	1684	2096	2026	2086	2456	1984	2096	2246	3182	2510	2232	2526	2524	2066	2234	1776	2188	2836	1668	1294	3684	3512	3502	3524	3312	4386	3268	3076	3314	3510	4224	3308	93676	1834	366.759	2057.56	220.678	2506.67	381.153	1999.33	538.113	3653.33	377.85	3450	403.568
1.3.1.33	760	654	620	1790	1658	1968	2194	1874	2084	1884	2168	1906	2234	1714	1378	1504	1434	1342	2172	2274	2898	3684	1608	1362	4396	4256	4494	3144	3988	4836	4252	3834	3908	4588	4940	3862	93662	678	73.0205	1947.33	176.142	1601	336.917	2333	853.498	4185.67	581.607	4230.67	453.579
1.4.3.4	1708	1412	1392	3408	3006	3402	3290	3928	2720	3378	3468	3298	3606	2660	2520	2170	1888	2392	1506	1278	1556	2524	1670	1476	2194	2070	2164	1802	2536	2812	3496	3018	2992	3578	4084	3026	93428	1504	176.952	3322	329.648	2539.33	589.077	1668.33	438.29	2263	357.844	3365.67	436.795
4.1.1.45	2436	1394	1920	6040	5366	5884	5722	6606	4494	6650	6422	5526	3092	2328	1764	1644	1218	2088	970	792	1056	1418	1260	1300	1472	1306	1440	1218	1686	1684	1234	1136	1206	1232	1212	1150	93366	1916.67	521.008	5856.67	686.47	2022.33	647.882	1132.67	234.103	1467.67	191.689	1195	41.9667
1.1.1.346	1830	1422	1448	2836	2584	3026	2924	3482	3082	2982	3130	3374	2476	1860	1524	1810	1280	2302	1366	1338	1672	2104	1354	984	4252	4130	4034	4124	3670	5430	2446	2186	2366	2736	3340	2416	93320	1566.67	228.424	3046.67	269.943	1875.33	452.815	1469.67	379.645	4273.33	600.411	2581.67	411.777
1.8.99.5	3026	2412	2406	1660	1616	1970	1990	1928	2326	2078	2544	1894	2338	2538	2122	2224	2406	2148	2588	2196	2318	1376	1844	1352	3958	3702	3892	5556	4004	5686	2428	2674	2364	2642	2462	2584	93252	2614.67	356.238	2000.67	293.421	2296	161.116	1945.67	510.135	4466.33	901.241	2525.67	125.433
3.4.11.24	2308	1436	2004	2290	2122	2556	2326	2748	2324	2348	2244	2550	3688	2986	2204	3318	3752	2572	1726	1618	2012	2142	1528	1164	3232	3062	3132	3604	3436	4170	2740	2616	2592	2744	2904	2714	92912	1916	442.61	2389.78	191.923	3086.67	618.369	1698.33	351.275	3439.33	410.078	2718.33	111.401
1.5.99.5	2904	1964	2078	3152	2468	2950	2838	3574	2268	2674	2464	2834	3880	2522	2200	2452	2254	2166	1986	1782	2194	2648	2546	2124	2478	2290	2408	2070	2862	3010	2662	2448	2522	3060	3550	2574	92856	2315.33	512.977	2802.44	398.442	2579	652.965	2213.33	330.359	2519.67	354.054	2802.67	424.586
6.2.1.26	2344	1708	1762	1498	1448	1772	1608	1594	1666	1462	1636	1516	3358	2350	2084	2220	2366	1530	1896	1612	2262	2890	1374	1188	3580	3600	3416	3160	3658	4170	4410	3866	3970	4666	5090	4110	92840	1938	352.641	1577.78	106.36	2318	595.018	1870.33	628.083	3597.33	333.49	4352	466.323
1.1.1.195	1868	1458	1366	3230	2666	3304	3306	3934	3100	3802	4100	3538	3172	2244	1686	2118	1860	1936	1614	1530	2072	1710	1780	1766	3792	3764	3690	3214	3310	4140	1966	1840	1962	1890	2052	1922	92702	1564	267.26	3442.22	449.37	2169.33	528.639	1745.33	186.121	3651.67	340.746	1938.67	72.8249
2.7.1.45	2062	1744	1618	2448	2164	2812	2818	3110	3230	2872	3000	3064	3958	3178	2274	2826	2282	2578	1648	1420	1742	2162	1176	1058	3520	3298	3128	3976	3388	4588	2254	2058	2108	2464	2458	2204	92688	1808	228.814	2835.33	337.919	2849.33	642.527	1534.33	404.569	3649.67	541.858	2257.67	171.969
3.5.3.12	2162	2020	1646	2112	2022	2476	2350	2844	2440	2430	2522	2608	3430	2502	2140	2952	3180	2304	1402	1236	1742	1968	1514	1026	3094	2892	2892	3690	3398	4086	3130	2682	2880	3358	3526	3014	91670	1942.67	266.551	2422.67	246.795	2751.33	513.929	1481.33	340.491	3342	478.389	3098.33	309.659
2.4.1.266	1656	1528	1438	2590	2296	2982	3028	3238	3344	2898	3228	3220	2438	2046	1554	1816	1602	1828	2190	1944	2438	2150	1622	1238	3352	3368	3804	3814	3362	4452	2598	2202	2238	2622	2858	2346	91328	1540.67	109.551	2980.44	344.084	1880.67	325.354	1930.33	435.428	3692	432.32	2477.33	257.19
2.7.1.16	1442	1268	1184	2752	2404	3448	3168	3382	4150	3134	3612	3670	3254	2246	1744	2190	2002	1854	1472	1536	1898	1378	900	766	3966	3676	3754	4220	3440	4832	2044	2044	2018	2122	2278	1956	91204	1298	131.59	3302.22	516.409	2215	543.808	1325	421.989	3981.33	493.717	2077	112.005
5.1.99.1	2546	1766	1894	2442	2212	2820	2686	3180	2786	3170	3312	2898	2680	2174	1728	2152	1956	1980	1934	1764	2264	2168	1598	1380	2830	2540	2566	3336	2796	4392	2990	2690	2770	2916	3104	2610	91030	2068.67	418.308	2834	358.843	2111.67	321.647	1851.33	338.043	3076.67	705.091	2846.67	188.682
1.16.1.1	1658	1486	1270	2790	2458	2978	3080	3392	2836	3292	3290	2988	3068	2356	1814	2004	1834	2022	1912	1864	1916	2504	1772	1392	2924	2710	2840	2784	2764	3578	2836	2754	2594	3206	3270	2716	90952	1471.33	194.415	3011.56	294.452	2183	475.201	1893.33	357.965	2933.33	324.113	2896	276.891
2.7.8.31	2062	1360	1496	2604	2096	2464	2580	3068	2628	2788	2788	2742	3698	2706	2214	2716	2776	2252	1428	1322	1720	1916	1216	1122	3904	3574	3576	3510	3172	4184	2452	2384	2390	2608	2782	2588	90886	1639.33	372.303	2639.78	266.774	2727	535.649	1454	306.323	3653.33	348.982	2534	154.826
4.2.1.172	1878	1662	1450	1144	1030	1566	1638	1504	2334	1574	1848	1642	2202	2360	1812	2480	3530	1956	2480	2156	2726	1576	1196	912	4930	4254	4458	7686	4914	8020	2060	1920	1756	1956	1890	2010	90510	1663.33	214.003	1586.67	378.443	2390	610.964	1841	726.645	5710.33	1683.46	1932	105.762
1.12.98.4	1738	1696	1538	1826	1352	1896	1852	2230	2114	1920	2000	1944	3264	3002	2370	2452	2388	1948	1984	1708	2242	1960	1308	1000	3130	2978	3028	3606	2808	3984	3958	3520	3506	4076	4200	3708	90234	1657.33	105.458	1903.78	243.671	2570.67	477.952	1700.33	465.993	3255.67	446.84	3828	293.168
1.3.99.4	1540	1074	1234	3728	3612	4364	3926	4370	3894	3918	4046	4084	2322	2006	1400	1810	1464	2180	1300	1216	1322	1562	1164	1136	2984	3102	3276	2218	2772	3006	2376	2228	2236	2556	2536	2118	90080	1282.67	236.781	3993.56	256.456	1863.67	376.297	1283.33	154.861	2893	369.239	2341.67	178.323
2.7.11.5	3456	2262	2756	2014	1730	1960	2054	2516	2120	1988	2244	1988	3766	2528	2274	2154	2226	1412	2108	1682	2026	2168	2180	1948	3506	3308	3464	2642	3064	3598	2840	2764	2698	2600	2462	2800	89306	2824.67	599.954	2068.22	216.854	2393.33	770.05	2018.67	186.923	3263.67	357.474	2694	141.512
2.6.1.66	2388	2122	1940	2258	1848	2310	2478	2702	2330	2396	2648	2434	3408	2472	2176	2754	2894	2236	1592	1400	1522	2008	1644	1600	3048	2890	3012	3542	3250	4162	2514	2378	2678	2556	2942	2552	89084	2150	225.309	2378.22	248.386	2656.67	463.121	1627.67	204.917	3317.33	472.621	2603.33	191.782
2.7.1.63	1612	1472	1394	1926	1794	2110	1958	2152	2060	2002	2118	2050	2942	2156	1756	1954	1792	1856	1762	1666	2276	2938	1374	1052	3010	2686	2912	2256	3022	3312	4566	4090	4010	4414	4758	3788	88996	1492.67	110.46	2018.89	112.748	2076	447.816	1844.67	673.8	2866.33	360.722	4271	368.46
2.6.1.48	2228	1844	1798	1864	1636	2122	2146	2372	2152	2182	2338	2402	3000	2198	1920	2200	2046	1878	1924	1414	1938	2126	1922	1742	2610	2504	2536	3310	3124	3854	3674	3222	3476	3780	3896	3402	88780	1956.67	236.104	2134.89	248.47	2207	411.22	1844.33	243.371	2989.67	539.178	3575	252.668
3.2.1.78	1660	1346	1192	2260	2188	2546	2494	2778	2736	2584	2852	2612	3166	2354	1928	2476	3132	1806	1314	1378	1538	2298	1058	990	3528	3358	3368	4046	3636	4522	2756	2438	2464	2822	2574	2502	88700	1399.33	238.515	2561.11	223.598	2477	578.017	1429.33	471.854	3743	457.203	2592.67	160.198
1.3.7.8	5614	3642	4236	3582	3116	3438	3782	4218	3394	5248	5216	3914	2390	2072	1712	1856	2072	1948	1478	1042	1394	610	2010	1990	1498	1476	1466	2588	1660	2852	1100	1186	1124	1148	1090	1126	88288	4497.33	1011.64	3989.78	772.732	2008.33	231.705	1420.67	543.327	1923.33	626.692	1129	34.6583
1.14.13.8	846	720	646	2216	1892	2274	2044	2366	1956	1912	1840	2060	2428	1746	1688	1920	1510	1696	1868	1958	2486	3012	1814	1384	2718	2614	2750	2358	3062	3094	4930	4232	4180	4608	5270	4142	88240	737.333	101.12	2062.22	184.839	1831.33	320.396	2087	574.137	2766	278.326	4560.33	462.604
1.4.7.1	1674	1738	1324	3058	2624	3090	3112	3464	3048	3568	3464	3564	3650	2612	2112	2176	1648	1896	2112	1786	1748	3394	2264	2006	2220	1772	1826	1666	2110	2458	2478	2276	2276	2732	2630	2552	88128	1578.67	222.857	3221.33	315.853	2349	713.369	2218.33	608.078	2008.67	304.509	2490.67	186.409
4.1.3.17	1788	1400	1608	3514	3186	3552	3684	4112	3550	3954	3932	3718	3054	2180	1692	1690	1344	2116	1650	1562	1860	1756	1610	1316	2788	2664	3014	2422	2704	3302	1966	1858	1820	1814	2010	1924	88114	1598.67	194.168	3689.11	280.801	2012.67	596.173	1625.67	185.84	2815.67	305.636	1898.67	80.7234
6.3.1.5	2744	1976	2158	2950	2358	2804	3108	3582	2658	3094	3214	2756	3644	2788	2306	3394	3418	2800	1832	1448	1770	1894	1836	1394	1994	1774	1792	2514	2132	3274	2088	1848	1806	2100	2400	2030	87678	2292.67	401.319	2947.11	355.216	3058.33	508.106	1695.67	217.018	2246.67	571.665	2045.33	213.098
4.6.1.12	2318	1630	1746	2394	2088	2538	2556	2882	2308	2866	2764	2596	2784	1942	1748	2010	2222	1676	1720	1516	1800	2134	1654	1198	2996	2886	2996	3016	3156	3982	2872	2734	2872	2958	3354	2720	87632	1898	368.326	2554.67	263.23	2063.67	402.88	1670.33	310.307	3172	406.064	2918.33	231.943
2.6.1.22	2140	1760	1746	1862	1636	2112	2142	2346	2138	2188	2312	2402	2812	2078	1820	2086	1954	1820	1928	1414	1932	2122	1922	1740	2596	2504	2530	3300	3110	3848	3644	3184	3428	3742	3870	3368	87536	1882	223.544	2126.44	243.261	2095	370.294	1843	242.437	2981.33	538.376	3539.33	256.664
6.2.1.76	2614	1592	1974	2902	2242	2894	2848	3350	2710	3186	3182	2876	3078	2316	1914	2110	1806	2012	1620	1516	1772	2254	1730	1622	2874	2810	2926	2610	2838	3362	2518	2194	2114	2436	2412	2258	87472	2060	516.399	2910	323.13	2206	461.433	1752.33	261.881	2903.33	249.308	2322	157.007
3.6.1.9	2078	1632	1550	2214	2098	2386	2418	2896	2252	2774	2736	2708	2316	1914	1686	1848	1658	1586	1732	1504	2160	2096	2008	1558	2900	2880	2784	2490	2682	3622	3438	2988	2942	3576	4056	3210	87376	1753.33	284.143	2498	286.234	1834.67	265.82	1843	282.91	2893	387.42	3368.33	417.695
2.8.1.6	1778	1666	1562	2790	2362	2672	2846	3040	2560	2878	3062	2834	2856	1922	1878	2150	2412	2144	1654	1322	1524	1788	1366	1254	2606	2376	2626	3906	2956	3890	2734	2494	2522	2836	3260	2752	87278	1668.67	108.025	2782.67	223.278	2227	362.632	1484.67	207.837	3060	674.946	2766.33	277.011
5.3.3.17	2282	1640	1746	2324	2084	2458	2430	2948	2242	2596	2676	2508	3266	2402	1988	2536	2158	2102	1686	1372	1836	2152	1952	1666	2462	2392	2634	2414	2676	3032	3166	2830	2952	3250	3458	2872	87188	1889.33	344.165	2474	253.016	2408.67	465.858	1777.33	268.089	2601.67	241.016	3088	245.334
1.1.1.60	2826	1838	2182	3284	2830	3360	3570	3814	3258	3280	4008	3332	2568	1836	1450	1740	1238	1780	2032	1562	1918	2038	1606	1508	2972	2954	3192	2422	2644	3584	2016	1762	1694	1716	1766	1590	87170	2282	501.534	3415.11	344.066	1768.67	453.337	1777.33	245.297	2961.33	408.086	1757.33	141.933
4.2.1.8	2260	1938	1842	1830	1542	2246	2118	2374	2376	1998	2166	2190	3502	2800	2264	2644	2172	2246	1522	1450	1866	2016	1204	998	3816	3432	3506	3832	3522	4806	2446	2124	2446	2530	2670	2358	87052	2013.33	218.946	2093.33	269.169	2604.67	505.333	1509.33	385.303	3819	511.917	2429	182.716
3.5.4.19	2278	1850	1824	2136	1814	2266	2198	2702	2216	2362	2440	2402	2894	2248	1882	2476	2442	1902	1824	1564	1854	2522	1644	1326	2922	2618	2766	3274	3180	3792	2896	2560	2652	3018	3496	2704	86944	1984	254.943	2281.78	243.457	2307.33	384.574	1789	407.126	3092	422.071	2887.67	341.691
1.8.4.10	1828	1522	1450	3118	2688	3024	2874	3618	2640	2892	3068	3180	3076	1988	1818	3198	3156	2616	1202	1110	1430	1844	1532	1530	1886	1804	1834	2090	2124	2480	2846	2612	2848	3150	3988	2686	86750	1600	200.709	3011.33	292.997	2642	611.401	1441.33	262.836	2036.33	254.921	3021.67	508.289
1.8.4.8	1828	1522	1450	3118	2688	3024	2874	3618	2640	2892	3068	3180	3076	1988	1818	3198	3156	2616	1202	1110	1430	1844	1532	1530	1886	1804	1834	2090	2124	2480	2846	2612	2848	3150	3988	2686	86750	1600	200.709	3011.33	292.997	2642	611.401	1441.33	262.836	2036.33	254.921	3021.67	508.289
3.4.24.64	2098	1730	1548	2560	2312	2746	2806	3544	2580	3148	3372	2926	2466	1884	1772	1792	1836	1886	1612	1416	1788	2074	1700	1186	2446	2296	2222	2976	2868	3382	2924	2800	2748	2998	3458	2740	86640	1792	280.193	2888.22	402.298	1939.33	262.171	1629.33	306.677	2698.33	452.929	2944.67	271.395
1.8.5.3	1378	1338	1082	2780	2460	3224	3208	3264	3526	3202	3602	3226	2896	2614	2074	2698	2094	2480	1572	1432	1676	1556	1020	1018	2822	2554	2644	2390	2286	3240	2460	2408	2364	2736	2790	2338	86452	1266	160.599	3165.78	351.204	2476	332.347	1379	289.413	2656	342.583	2516	196.501
2.5.1.55	2504	1930	1930	2200	1994	2364	2346	2816	2354	2734	2728	2550	3080	2064	1760	2442	2960	1976	2040	1638	1938	2210	2050	1626	2950	2654	2882	3948	3310	4164	1968	2008	2018	2088	2112	2036	86372	2121.33	331.399	2454	273.774	2380.33	543.639	1917	237.331	3318	613.041	2038.33	53.2529
3.5.1.19	2126	1496	1490	2422	2166	2566	2686	2794	2850	2816	3022	2868	3320	2404	2102	2600	2438	2364	1844	1470	1762	1930	1506	1198	2134	2082	2436	3028	2514	3570	2720	2282	2454	2740	3536	2508	86244	1704	365.475	2687.78	263.616	2538	415.619	1618.33	275.682	2627.33	572.603	2706.67	441.074
1.4.3.19	1806	1258	1478	2452	2092	2502	2520	3028	2212	2274	2478	2308	2634	1808	1376	2348	2636	1984	2156	1792	2128	2770	1886	1378	3258	2942	3312	3526	3226	4288	2280	2078	2024	2302	3102	2316	85958	1514	275.768	2429.56	268.016	2131	500.217	2018.33	463.626	3425.33	462.281	2350.33	388.362
1.97.1.9	2570	1824	1892	1620	1484	1860	1852	1740	2462	1992	2288	2000	2300	2260	1860	1936	1708	1666	2902	2358	2312	2146	1896	1970	3522	3268	3498	4594	3760	5400	2190	2084	2056	2158	2292	2020	85740	2095.33	412.477	1922	308.516	1955	270.542	2264	361.654	4007	822.977	2133.33	100.253
4.1.1.39	3200	2204	2422	1308	1296	1508	1534	1686	1684	1764	1726	1776	3632	2734	2364	3432	3436	2492	2306	1756	1734	1752	2618	2012	3220	2896	2966	2124	2750	2852	2694	2662	2596	2976	2714	2726	85552	2608.67	523.581	1586.89	186.129	3015	549.201	2029.67	363.928	2801.33	367.516	2728	130.108
3.6.1.25	1734	1458	1334	2650	2134	2466	2438	2906	2402	2268	2384	2540	2400	1812	1430	1636	1838	1558	1468	1420	1878	1818	1546	1082	3590	3236	3542	2918	2952	3880	2644	2644	2596	3260	4550	2922	85334	1508.67	204.757	2465.33	221.912	1779	340.97	1535.33	290.097	3353	382.971	3102.67	752.28
1.1.1.303	1584	1212	1096	2842	2704	3454	3278	3302	3012	3192	3460	3250	2408	1878	1424	1554	1270	1652	1628	1592	1966	1834	1232	994	3704	3708	3824	3114	3494	3938	2010	1758	1792	1944	2544	1684	85332	1297.33	254.946	3166	262.271	1697.67	404.379	1541	366.424	3630.33	292.852	1955.33	312.693
1.1.1.4	1584	1212	1096	2842	2704	3454	3278	3302	3012	3192	3460	3250	2408	1878	1424	1554	1270	1652	1628	1592	1966	1834	1232	994	3704	3708	3824	3114	3494	3938	2010	1758	1792	1944	2544	1684	85332	1297.33	254.946	3166	262.271	1697.67	404.379	1541	366.424	3630.33	292.852	1955.33	312.693
7.5.2.5	2680	1790	1988	2250	1878	2282	2304	2616	2142	2250	2508	2292	2894	2136	1950	2194	2712	1994	1842	1388	1854	2090	1896	1612	2820	2576	2664	3350	3106	4314	2486	2174	2362	2400	2840	2374	85008	2152.67	467.291	2280.22	208.582	2313.33	393.899	1780.33	245.26	3138.33	643.52	2439.33	221.318
1.14.11.17	1652	964	1076	4024	3672	4330	3708	4224	3170	3568	3628	3468	2424	1742	1512	1466	824	1666	1674	1482	1958	2064	2030	1612	2482	2348	2550	1708	2566	2516	1970	1734	2014	2124	2804	2118	84872	1230.67	369.158	3754.67	372.112	1605.67	515.98	1803.33	244.883	2361.67	329.541	2127.33	360.634
3.5.99.6	2010	1672	1600	2036	1514	2012	1876	2306	2106	1990	1962	1972	2862	2064	1754	2388	2858	1740	1762	1666	1962	2518	1314	954	3072	2906	3128	3890	3514	4572	2916	2506	2548	2944	3134	2760	84788	1760.67	218.909	1974.89	210.516	2277.67	509.779	1696	538.179	3513.67	628.453	2801.33	243.835
2.1.1.44	1770	1266	1304	3096	2482	2874	2670	3616	2384	2882	2874	2856	2368	1790	1786	1806	1858	1896	2038	1628	2044	2634	2232	1988	3200	2948	3224	2624	3114	3632	1866	1856	1858	1996	2216	2044	84720	1446.67	280.659	2859.33	359.458	1917.33	224.915	2094	330.052	3123.67	333.141	1972.67	143.514
2.4.2.4	2782	1986	2152	2206	1990	2310	2372	2448	2052	2146	2174	2364	2548	1824	1662	2094	1980	1950	1466	1380	1928	2826	1906	1710	2880	2816	3052	2498	3050	3234	2894	2628	2658	2862	3192	2596	84616	2306.67	419.935	2229.11	154.955	2009.67	302.225	1869.33	519.136	2921.67	254.324	2805	226.962
2.6.1.108	2246	1790	1686	2094	1878	2208	2092	2558	2114	2224	2254	2202	2522	1610	1476	2024	1864	1726	1940	1762	2072	2362	1664	1266	3056	2954	3234	2598	2808	3452	3224	2934	2964	3268	3362	3086	84574	1907.33	297.868	2180.44	181.06	1870.33	372.136	1844.33	374.895	3017	303.66	3139.67	172.656
4.99.1.4	1484	1254	1244	2496	2152	2774	2600	3000	2456	2724	2678	2744	2340	1544	1578	1574	1456	1744	1296	1016	1578	1588	1412	1162	2822	2784	2946	2378	2352	2992	3642	3182	3290	3890	5120	3254	84546	1327.33	135.769	2624.89	239.571	1706	324.331	1342	228.869	2712.33	279.855	3729.67	732.929
5.4.99.18	1920	1616	1562	2002	1686	2044	2108	2314	2056	2246	2346	2254	2958	2226	1856	2274	2426	1950	1716	1390	1816	2036	1574	1384	2892	2758	2984	3156	3182	4000	2986	2490	2478	3106	3678	2822	84292	1699.33	193.001	2117.33	204.565	2281.67	393.093	1652.67	254.95	3162	440.563	2926.67	447.91
4.2.3.12	2020	1568	1680	2006	1792	2126	2328	2498	2230	2016	2384	2168	2734	2038	1728	2376	3036	2128	1872	1600	1602	1916	1526	1368	3482	3272	3392	3826	3162	4322	2428	2194	2274	2410	2518	2176	84196	1756	235.389	2172	217.182	2340	479.925	1647.33	209.619	3576	430.237	2333.33	139.018
2.7.1.167	2158	1796	1870	2226	1806	2278	2624	2674	2246	2834	2966	2388	2106	1832	1742	1652	2302	1624	1868	1674	1894	1616	1744	1412	3272	3218	3230	3924	3314	4734	2398	2242	2110	2252	2024	2104	84154	1941.33	191.252	2449.11	359.533	1876.33	271.274	1701.33	178.023	3615.33	610.201	2188.33	135.017
1.3.8.4	2910	2240	2298	2354	2186	2426	2320	2806	2056	2520	2542	2532	3460	2346	2104	2424	2302	1926	1880	1418	1902	2630	2202	2106	2090	2254	2114	1890	2558	2608	2410	2140	2378	2444	2954	2378	84108	2482.67	371.216	2415.78	220.201	2427	537.515	2023	402.118	2252.33	281.676	2450.67	269.116
3.5.4.21	2058	1786	1572	2682	2386	2638	2744	3170	2658	2592	2784	2632	3294	2248	1992	2408	2362	2066	2058	1834	2092	2914	1700	1586	2432	2332	2674	2234	2896	3264	2006	1894	1748	2076	2246	1952	84010	1805.33	243.576	2698.44	209.37	2395	469.408	2030.67	475.507	2638.67	389.621	1987	168.735
3.5.4.1	2058	1786	1572	2682	2386	2638	2744	3170	2658	2592	2784	2632	3294	2248	1992	2408	2362	2066	2058	1834	2092	2914	1700	1586	2432	2332	2674	2234	2896	3264	2006	1894	1748	2076	2246	1952	84010	1805.33	243.576	2698.44	209.37	2395	469.408	2030.67	475.507	2638.67	389.621	1987	168.735
2.4.99.24	2442	1750	2034	2338	2130	2514	2950	3156	2542	3030	3334	2798	2544	1934	1684	1718	2718	1712	2296	1764	2334	1558	1530	1230	2974	2874	2914	3798	2986	4184	1788	1736	1766	1588	1486	1650	83784	2075.33	347.847	2754.67	399.922	2051.67	460.896	1785.33	444.419	3288.33	559.283	1669	117.021
4.1.2.50	1980	1546	1664	1970	1758	2102	2292	2454	2220	1968	2342	2120	2722	2026	1726	2358	3036	2118	1872	1600	1602	1916	1526	1368	3482	3272	3392	3826	3158	4316	2426	2192	2274	2410	2516	2176	83726	1730	224.401	2136.22	216.514	2331	480.636	1647.33	209.619	3574.33	428.932	2332.33	138.618
3.5.5.1	2904	1952	2372	2092	2016	2260	2262	2758	2224	2650	2744	2422	2212	1616	1282	1362	1482	1546	2192	2038	2224	2552	1810	1320	3400	3306	3574	3208	3334	3842	2324	2098	2092	1972	2130	2060	83632	2409.33	477.097	2380.89	277.97	1583.33	330.981	2022.67	421.57	3444	229.817	2112.67	116.761
2.1.1.265	2158	1786	1462	2116	1862	2374	2314	2662	2360	2460	2714	2394	3180	2590	2014	2498	2496	2084	1604	1284	1472	1798	1288	1026	3002	2512	2736	2680	2776	3700	2680	2490	2464	2604	3328	2636	83604	1802	348.276	2361.78	259.205	2477	418.712	1412	272.109	2901	422.283	2700.33	318.713
6.3.2.31	1502	1176	1190	2444	1946	2434	2384	2820	2364	2418	2406	2382	3002	2278	1832	2302	1820	1986	1414	1462	1980	2248	1296	1390	2808	2802	2906	2490	2600	3344	3094	2824	2812	3242	3304	2850	83552	1289.33	184.308	2399.78	220.183	2203.33	443.902	1631.67	386.896	2825	296.51	3021	221.806
6.3.2.34	1502	1176	1190	2444	1946	2434	2384	2820	2364	2418	2406	2382	3002	2278	1832	2302	1820	1986	1414	1462	1980	2248	1296	1390	2808	2802	2906	2490	2600	3344	3094	2824	2812	3242	3304	2850	83552	1289.33	184.308	2399.78	220.183	2203.33	443.902	1631.67	386.896	2825	296.51	3021	221.806
1.7.2.4	3296	2708	2696	2852	2326	2888	2706	3234	2938	3360	3512	2880	3910	2884	2226	3638	4066	2590	1012	814	1070	1198	1390	1306	1152	1020	1094	680	876	966	2746	2440	2610	2894	2782	2704	83464	2900	342.999	2966.22	358.754	3219	756.884	1131.67	210.03	964.667	169.577	2696	156.266
7.6.2.5	2910	1744	2200	2370	2108	2496	2470	2804	2226	2522	2674	2466	3166	2450	1978	2234	2494	1838	1562	1408	1604	1860	1568	1316	2772	2520	2716	2892	2552	3356	2404	2218	2350	2286	2382	2252	83168	2284.67	587.593	2459.56	210.999	2360	471.164	1553	186.735	2801.33	305.068	2315.33	74.6369
3.13.2.3	2382	1792	1904	2134	1794	2026	2118	2374	2202	2320	2386	2190	2892	2056	1792	2364	2430	1820	1954	1542	1896	2134	1586	1334	3558	2960	3238	3892	3222	4502	2076	2048	1862	2198	2168	1920	83066	2026	313.35	2171.56	186.509	2225.67	421.024	1741	301.038	3562	561.337	2045.33	133.133
2.4.2.7	2088	1740	1556	2266	2102	2360	2474	2780	2520	2786	2838	2516	3132	2294	1944	2400	2188	2108	1538	1310	1714	2182	1388	1298	2322	2152	2238	2064	2382	2848	2814	2600	2488	3102	3778	2682	82992	1794.67	270.18	2515.78	251.568	2344.33	416.32	1571.67	337.934	2334.33	276.363	2910.67	474.483
2.8.1.12	1776	1518	1478	2302	1930	2222	2328	2654	2146	2244	2716	2372	2918	2122	1738	2266	2136	2046	1498	1318	1596	2028	1396	1266	2708	2604	2670	2296	2492	3170	3252	2718	2984	3216	3986	2876	82986	1590.67	161.745	2323.78	242.15	2204.33	391.691	1517	277.476	2656.67	291.991	3172	447.215
3.1.26.5	1952	1710	1792	2258	1862	2076	2248	2426	1934	2110	2484	2176	2998	2228	1756	2468	3026	2286	1540	1366	1668	1830	1656	1322	2540	2586	2598	3144	2736	3652	2750	2426	2390	2924	3352	2586	82856	1818	123.077	2174.89	206.391	2460.33	487.766	1563.67	194.103	2876	439.973	2738	361.466
2.7.1.172	1918	1436	1652	1404	1190	1550	1478	1654	1628	1278	1398	1546	2652	1924	1640	2070	2284	1662	2048	1794	2490	3102	2042	1538	3676	3458	3518	3068	3560	4100	3268	2832	2892	3092	3186	2788	82816	1668.67	241.432	1458.44	155.99	2038.67	387.636	2169	555.533	3563.33	334.431	3009.67	199.577
1.1.1.69	2006	1608	1596	2652	2402	2846	3000	3490	2882	3374	3344	3094	3072	2132	1696	1854	1610	1774	1580	1358	1640	1994	1452	1336	2638	2830	2866	2724	3000	3468	1892	1730	1806	1984	2178	1770	82678	1736.67	233.327	3009.33	357.546	2023	544.122	1560	244.049	2921	295.179	1893.33	166.597
3.1.3.21	1360	1106	1068	1808	1584	1958	1820	2114	1978	1942	1934	2024	2362	1754	1492	1528	1054	1422	1430	1398	1976	2430	1188	992	2538	2460	2640	2094	2718	3016	4808	4006	4322	4892	5278	4014	82508	1178	158.758	1906.89	153.229	1602	436.116	1569	535.467	2577.67	304.981	4553.33	519.358
3.7.1.2	2918	1948	2370	2388	2036	2326	2392	2874	2224	2624	2596	2598	3590	2686	1914	3006	3258	2202	1500	1202	1420	2288	1668	1576	2028	1888	1914	1788	2508	2620	2340	2142	2160	2350	2894	2260	82496	2412	486.362	2450.89	249.58	2776	636.936	1609	368.473	2124.33	350.822	2357.67	276.82
1.13.11.3	1776	1138	1394	3610	3128	3534	3582	3970	3262	3688	3810	3650	3150	2416	1694	2100	1788	1712	1308	1124	1386	1770	1304	1294	2326	2434	2396	1648	2028	2490	1756	1640	1636	1920	2284	1810	81956	1436	321.067	3581.56	257.388	2143.33	566.359	1364.33	216.59	2220.33	324.023	1841	242.117
2.3.2.27	1880	1382	2116	2892	2120	2762	2740	3020	2602	2578	3318	2680	3236	2722	1822	2620	2670	2344	1420	1266	2324	1112	1708	2844	3060	2858	2536	2576	2096	3340	1528	1430	1498	1576	1564	1678	81918	1792.67	374.712	2745.78	329.594	2569	466.848	1779	674.274	2744.33	438.055	1545.67	83.3443
3.4.24.28	1894	1380	1402	2338	2108	2778	2712	2942	3076	2924	3028	2908	3244	2670	2318	3234	3174	3182	1290	1016	1370	1380	1118	842	2538	2390	2374	2862	2536	3264	1970	1846	1846	1912	2178	1870	81914	1558.67	290.615	2757.11	327.747	2970.33	386.377	1169.33	215.639	2660.67	343.678	1937	127.158
4.2.1.79	2104	1580	1884	3390	3010	3482	3348	3834	2826	3560	3448	3180	2506	1990	1576	1670	1634	1942	1710	1380	1726	1702	1766	1516	2572	2274	2394	2394	2160	3000	1846	1548	1662	1662	1696	1742	81714	1856	263.12	3342	301.141	1886.33	347.739	1633.33	151.476	2465.67	295.723	1692.67	98.7576
4.2.3.2	2592	1724	1790	1548	1612	1846	1714	1942	1870	1722	1746	1616	2702	2040	1676	1692	1612	1538	1878	1528	2246	2198	1728	1734	2724	2620	2586	2820	2786	3408	3408	3256	3326	3526	3786	3146	81686	2035.33	483.216	1735.11	131.522	1876.67	439.765	1885.33	283.985	2824	300.259	3408	225.956
1.1.2.8	1980	1490	1610	4828	4064	3974	4338	5442	2956	5072	4750	4064	2928	2304	1618	2010	1472	2096	1050	898	1104	1496	2156	1710	1296	1412	1314	1228	1586	1532	1214	1042	1236	1356	1590	1436	81652	1693.33	255.408	4387.56	736.367	2071.33	520.979	1402.33	477.271	1394.67	141.272	1312.33	191.246
6.3.5.11	1678	1276	1374	2454	1930	2510	2656	2732	2800	2206	2530	2202	2134	1844	1456	1808	1856	2044	2310	1846	2030	1654	2082	1558	3440	3108	3328	3728	2750	4166	1934	1920	1824	2294	2102	2026	81590	1442.67	209.612	2446.67	284.125	1857	234.551	1913.33	281.941	3420	491.221	2016.67	165.88
6.3.5.9	1678	1276	1374	2454	1930	2510	2656	2732	2800	2206	2530	2202	2134	1844	1456	1808	1856	2044	2310	1846	2030	1654	2082	1558	3440	3108	3328	3728	2750	4166	1934	1920	1824	2294	2102	2026	81590	1442.67	209.612	2446.67	284.125	1857	234.551	1913.33	281.941	3420	491.221	2016.67	165.88
2.7.7.38	2186	1812	1832	2028	1838	2282	2252	2606	2414	2328	2460	2536	2628	2032	1542	2130	2600	1760	1848	1496	1760	2022	1730	1398	3214	2768	2968	3820	3364	4254	1948	1818	1916	1820	2166	1978	81554	1943.33	210.393	2304.89	244.579	2115.33	438.146	1709	229.095	3398	552.744	1941	128.404
1.4.5.1	2814	2030	2024	2194	1836	2108	2056	2514	1856	2228	2200	2016	3536	2460	2124	2206	2280	1726	1814	1466	1754	2502	2034	1536	2086	1990	2024	1830	2206	2490	2616	2380	2508	2736	3994	2600	80774	2289.33	454.385	2112	207.246	2388.67	612.505	1851	378.29	2104.33	225.475	2805.67	594.148
3.1.6.20	2900	2106	2364	1802	1660	1872	1972	2278	1906	2070	2154	2242	2556	1824	1710	2078	1834	1816	1934	1610	1910	2266	2246	1642	3616	3790	3890	2150	2630	2830	2418	2056	2092	2156	1980	2280	80640	2456.67	405.03	1995.11	207.683	1969.67	311.829	1934.67	282.27	3151	713.744	2163.67	160.461
2.7.8.28	1644	1262	1212	2446	2316	2580	2504	2446	2312	2458	2894	2474	2760	2118	1852	2168	1614	1934	1528	1552	2116	2212	1356	1180	2738	2774	2814	2092	2606	3090	2616	2452	2404	2620	2884	2488	80516	1372.67	236.308	2492.22	172.692	2074.33	390.346	1657.33	415.813	2685.67	331.446	2577.33	173.835
1.3.7.7	908	712	504	464	324	536	568	714	526	440	458	436	2310	1416	1422	1834	1604	946	3652	3236	3000	5620	3538	3346	4450	4244	4398	3420	4806	4974	2546	2410	2330	2900	2956	2428	80376	708	202.03	496.222	108.395	1588.67	458.554	3732	952.829	4382	543.987	2595	267.614
3.5.1.124	1226	1162	1100	1798	1394	1888	1792	2128	2152	1916	2082	2034	2760	2266	1964	2472	2636	2256	1706	1470	1756	1994	1492	1002	3222	2964	3248	3546	2962	4116	2220	2282	2202	2714	3834	2534	80290	1162.67	63.0026	1909.33	235.661	2392.33	289.453	1570	338.105	3343	436.166	2631	622.619
2.6.1.55	1498	1542	1234	1408	1506	2158	2074	2172	2336	2336	2530	2472	2878	2280	1784	1994	1428	1866	1566	1502	2012	1816	954	748	2250	2138	2342	2184	2328	3126	3512	3250	3308	4074	4262	3384	80252	1424.67	166.581	2110.22	399.165	2038.33	496.447	1433	490.519	2394.67	366.948	3631.67	428.735
3.1.1.96	2108	1602	1604	1860	1514	1784	1894	2248	2090	1870	2112	1980	2674	2066	1854	2236	2398	1876	1580	1440	1754	1914	1432	1144	2806	2858	2782	3092	3008	3872	2904	2476	2598	2812	3236	2520	79998	1771.33	291.564	1928	214.033	2184	318.21	1544	270.428	3069.67	411.124	2757.67	287.918
1.3.8.12	1390	1244	1188	2580	2378	2650	2478	3054	2160	2588	2478	2566	2764	1860	1740	1868	1474	2020	1838	1446	1816	2474	2114	1650	2428	2214	2428	1684	2626	2774	2822	2580	2404	2816	2956	2404	79954	1274	104.288	2548	239.435	1954.33	436.551	1889.67	361.704	2359	382.017	2663.67	234.771
4.2.1.55	1870	1338	1454	2922	2572	2998	3032	3510	3040	3248	3360	3028	2808	2530	1672	1792	1396	1966	1682	1246	1646	1360	1410	1192	2726	2614	2532	2244	2426	3262	1728	1790	1698	1862	2080	1820	79854	1554	279.743	3078.89	271.08	2027.33	537.792	1422.67	202.799	2634	349.003	1829.67	136.419
1.14.13.127	1582	1280	1176	3866	3412	3518	3774	4478	2930	3772	3720	3636	2922	2238	1698	1780	1530	1844	1066	894	1326	1742	980	976	1834	1796	1840	1402	1816	1826	2022	1842	1916	1970	3172	2054	79630	1346	210.893	3678.44	411.215	2002	508.241	1164	320.01	1752.33	172.323	2162.67	500.228
2.1.1.144	1570	1010	1222	2890	2456	2566	2766	3226	2400	3036	3012	2650	2162	1636	1522	1792	1546	1876	1346	1248	1466	1954	1362	1148	2700	2596	2652	2610	2532	3452	2606	2252	2368	2682	2890	2256	79458	1267.33	282.739	2778	283.418	1755.67	242.399	1420.67	282.729	2757	345.095	2509	258.626
2.7.1.49	1720	1570	1388	2640	2278	2622	2774	3294	2404	3024	3150	2774	2414	1934	1654	2006	2020	1844	1678	1286	1730	1570	1894	1536	2728	2718	2532	2698	2538	3258	1854	1786	1832	2004	2540	1704	79396	1559.33	166.257	2773.33	335.084	1978.67	251.996	1615.67	205.689	2745.33	266.313	1953.33	303.81
2.7.4.7	1720	1570	1388	2640	2278	2622	2774	3294	2404	3024	3150	2774	2414	1934	1654	2006	2020	1844	1678	1286	1730	1570	1894	1536	2728	2718	2532	2698	2538	3258	1854	1786	1832	2004	2540	1704	79396	1559.33	166.257	2773.33	335.084	1978.67	251.996	1615.67	205.689	2745.33	266.313	1953.33	303.81
1.14.19.9	3142	2340	2420	1322	1204	1690	1642	2022	1398	1304	1248	1560	3502	2178	1684	2482	2558	1506	2332	1684	2248	3916	2930	2692	3146	3200	3044	2848	4162	3766	1622	1300	1476	1202	1158	1400	79328	2634	441.756	1487.78	265.195	2318.33	716.554	2633.67	758.578	3361	498.283	1359.67	174.967
3.5.4.32	1940	1456	1408	2282	2062	2866	2620	2640	2468	2618	2600	2628	3102	2390	1986	2396	1892	2106	1648	1402	1628	2124	1356	1140	2742	2692	2740	2626	2672	3230	1876	1640	1862	2004	2396	1980	79218	1601.33	294.274	2531.56	234.439	2312	438.714	1549.67	338.468	2783.67	222.974	1959.67	249.596
2.4.2.43	2566	1578	1900	2026	1690	2150	2196	2602	2142	2858	3124	2604	2634	1812	1452	2348	2366	1620	1134	1056	1016	1066	1066	594	3028	2800	2904	3594	2690	3730	2462	2488	2456	2622	2432	2314	79120	2014.67	503.882	2376.89	450.862	2038.67	474.993	988.667	197.041	3124.33	433.378	2462.33	99.1114
2.4.1.14	1334	990	1074	1548	1330	1884	1774	1972	2146	1448	1768	1772	1452	1294	1194	1300	1766	1050	2252	2002	2136	1916	1714	1450	4478	4392	4442	4740	4356	5454	2088	2084	2068	2240	2000	2172	79080	1132.67	179.347	1738	258.01	1342.67	246.215	1911.67	292.075	4643.67	419.553	2108.67	84.5663
6.5.1.6	1138	730	1064	2502	1960	2352	2170	2654	2078	2634	2490	2496	2560	1962	1732	2010	1642	1932	1978	1866	2014	3068	2174	2098	2736	2820	2950	2446	3216	3390	1902	1814	1940	2022	2280	2104	78924	977.333	217.369	2370.67	247.925	1973	321.055	2199.67	438.164	2926.33	339.914	2010.33	165.444
6.5.1.7	1138	730	1064	2502	1960	2352	2170	2654	2078	2634	2490	2496	2560	1962	1732	2010	1642	1932	1978	1866	2014	3068	2174	2098	2736	2820	2950	2446	3216	3390	1902	1814	1940	2022	2280	2104	78924	977.333	217.369	2370.67	247.925	1973	321.055	2199.67	438.164	2926.33	339.914	2010.33	165.444
2.4.1.245	1340	1192	1154	3060	2726	3016	3104	3776	2628	4192	4352	3496	1902	1606	1376	1564	1052	1790	1668	1402	1664	2074	1382	1142	2276	2148	2166	2586	2242	3442	1952	1660	1788	2030	2094	1762	78804	1228.67	98.2717	3372.22	620.297	1548.33	304.335	1555.33	321.844	2476.67	498.737	1881	169.86
4.1.3.25	1030	1188	834	2516	2270	2422	2476	2918	2252	2682	2500	2376	2510	1740	1288	1446	1278	1404	1678	1476	1752	1842	1690	1536	2450	2330	2468	2044	2470	3066	3170	3000	2974	3280	3518	2856	78730	1017.33	177.34	2490.22	207.269	1611	471.197	1662.33	135.655	2471.33	333.672	3133	241.206
2.1.2.5	2096	1688	1674	1826	1440	1956	2104	1958	2150	2310	2444	2132	2548	2238	1808	2318	2938	1856	1346	1380	1568	1100	956	808	3416	2888	2884	4882	3336	5186	1908	1810	1838	1890	1904	1954	78538	1819.33	239.703	2035.56	291.585	2284.33	426.718	1193	287.07	3765.33	1011.74	1884	51.9692
4.2.1.129	1320	1152	1084	3508	2852	3088	2994	4486	2596	3962	4056	3580	2990	2226	1700	1930	1732	1834	1734	1340	1730	1778	2034	1700	1384	1246	1430	1734	1618	2152	1874	1796	1732	2092	2060	1926	78450	1185.33	121.48	3458	627.322	2068.67	489.319	1719.33	222.285	1594	323.617	1913.33	142.681
5.4.99.17	1320	1152	1084	3508	2852	3088	2994	4486	2596	3962	4056	3580	2990	2226	1700	1930	1732	1834	1734	1340	1730	1778	2034	1700	1384	1246	1430	1734	1618	2152	1874	1796	1732	2092	2060	1926	78450	1185.33	121.48	3458	627.322	2068.67	489.319	1719.33	222.285	1594	323.617	1913.33	142.681
1.3.5.2	2062	1632	1712	2626	2222	2424	2524	3030	2384	2446	2732	2736	3048	2256	1938	2562	2556	2228	1408	1200	1328	1940	1344	1270	2504	2474	2372	2200	2318	3000	1882	1790	1762	1860	2642	1998	78410	1802	228.692	2569.33	240.583	2431.33	381.669	1415	266.659	2478	278.315	1989	330.366
2.7.4.6	1936	1538	1580	2106	1930	2194	2138	2388	2012	2186	2342	2114	2824	2042	1724	2266	2206	1756	1844	1468	1766	1866	1502	1300	2352	2134	2282	2814	2524	3632	2568	2362	2406	2742	3052	2404	78300	1684.67	218.672	2156.67	144.551	2136.33	404.505	1624.33	232.948	2623	546.481	2589	267.381
1.1.1.371	1210	1102	1122	1212	1022	1454	1546	1734	1662	1408	1576	1736	1852	1322	1234	1328	1400	1242	2024	1912	2390	2654	1364	1160	3414	3370	3324	3772	3548	4422	3340	3020	2936	3528	3852	3050	78242	1144.67	57.4572	1483.33	240.857	1396.33	231.522	1917.33	575.713	3641.67	415.025	3287.67	355.182
2.6.99.2	2374	1856	1960	2150	1632	2152	2352	2662	1914	2458	2498	2212	2434	1820	1684	2052	2402	1750	1830	1498	1848	2114	2012	1614	2654	2496	2524	3028	2980	3688	1954	1802	1740	1922	2022	1782	77870	2063.33	274.024	2225.56	315.319	2023.67	329.866	1819.33	232.509	2895	449.152	1870.33	111.473
3.1.3.8	1578	1340	1170	2160	2006	2290	2432	2188	2416	2142	2308	2242	3488	2810	2000	2484	2230	2106	1782	1364	1652	2550	1370	1256	2666	2560	2588	1966	2492	2824	2194	2122	2114	2116	2590	2250	77846	1362.67	204.942	2242.67	136.184	2519.67	556.474	1662.33	477.901	2516	292.424	2231	184.068
3.4.17.18	1648	1078	1184	1498	1414	1802	1726	1904	2100	1768	1906	2084	3518	3160	2486	2274	2950	1862	1696	1682	1928	1358	1134	818	3198	2752	2948	3680	3086	3884	2348	2104	2154	2078	2170	2438	77818	1303.33	303.159	1800.22	234.364	2708.33	611.935	1436	412.163	3258	437.1	2215.33	144.398
1.1.5.13	1712	1354	1368	2456	2152	2332	2448	2888	2404	2510	2650	2490	2286	1778	1444	1618	1486	1528	1616	1452	1640	1978	1514	1412	3066	2834	3042	3046	2930	3924	2050	2038	1758	2114	2458	1946	77722	1478	202.771	2481.11	204.088	1690	315.125	1602	204.626	3140.33	394.032	2060.67	230.695
1.3.7.14	862	626	652	382	286	486	476	660	554	452	406	482	2124	1328	1218	1442	1468	974	3602	2956	2796	5290	3554	3210	4394	4624	4698	3736	5096	5014	2194	1942	2134	2542	2712	2278	77650	713.333	129.404	464.889	105.698	1425.67	386.366	3568	901.702	4593.67	493.211	2300.33	281.335
1.3.7.15	862	626	652	382	286	486	476	660	554	452	406	482	2124	1328	1218	1442	1468	974	3602	2956	2796	5290	3554	3210	4394	4624	4698	3736	5096	5014	2194	1942	2134	2542	2712	2278	77650	713.333	129.404	464.889	105.698	1425.67	386.366	3568	901.702	4593.67	493.211	2300.33	281.335
2.1.1.104	1864	1218	1516	2716	2224	2800	2786	3192	2612	3082	3172	2820	2416	2058	1508	1706	1706	1676	1556	1368	1616	1712	1234	1220	2570	2584	2450	3042	2494	3368	1632	1524	1686	1910	2700	1836	77574	1532.67	323.322	2822.67	304.491	1845	332.32	1451	206.741	2751.33	369.505	1881.33	424.524
3.1.1.106	1376	1186	1220	2264	2014	2478	2522	2882	2286	2586	2770	2660	2028	1828	1524	1694	1534	1620	1688	1496	1676	1588	1474	1192	2738	2588	2590	3786	3078	4272	2212	1798	2026	2374	2364	2122	77534	1260.67	101.318	2495.78	271.642	1704.67	194.322	1519	183.005	3175.33	701.983	2149.33	219.033
5.3.3.2	1910	1414	1562	1846	1720	1700	1912	1970	1872	1604	1780	1932	2766	2076	1682	2634	2852	2074	1662	1430	1742	2140	1414	1426	2864	2564	2640	3102	2912	3738	2450	2260	2354	2422	2684	2372	77482	1628.67	254.632	1815.11	122.132	2347.33	469.713	1635.67	283.46	2970	423.222	2423.67	143.373
1.3.5.3	2016	1520	1686	1816	1560	1890	1972	2188	2120	1860	2024	1926	3758	2568	2302	2550	2338	2004	1402	1452	1886	2224	1148	1096	2776	2676	2688	2330	2558	3142	2274	2142	2086	2406	2716	2288	77388	1740.67	252.478	1928.44	183.594	2586.67	609.276	1534.67	439.315	2695	267.871	2318.67	225.292
5.1.3.30	1262	1050	990	2722	2518	2978	2942	3180	3112	2650	3132	3060	3892	2878	2196	2134	1966	1988	1346	1308	1524	1468	938	728	2338	2290	2518	2100	1968	2822	1802	1842	1690	1954	2054	1872	77212	1100.67	142.903	2921.56	236.258	2509	755.478	1218.67	315.949	2339.33	304.136	1869	125.474
5.1.3.31	1262	1050	990	2722	2518	2978	2942	3180	3112	2650	3132	3060	3892	2878	2196	2134	1966	1988	1346	1308	1524	1468	938	728	2338	2290	2518	2100	1968	2822	1802	1842	1690	1954	2054	1872	77212	1100.67	142.903	2921.56	236.258	2509	755.478	1218.67	315.949	2339.33	304.136	1869	125.474
3.4.17.13	1772	1420	1478	1628	1368	1714	1798	1900	1936	2026	1906	1964	2440	1996	1700	2130	2842	1794	1648	1314	1408	2098	1120	778	2666	2736	2786	3796	3042	4234	2532	2252	2314	2952	3266	2382	77136	1556.67	188.726	1804.44	206.499	2150.33	428.092	1394.33	451.942	3210	651.243	2616.33	405.193
2.3.1.169	2412	1988	2220	1466	1356	1908	2134	2118	2736	1824	2408	1932	2662	2384	1858	2178	2046	2300	2430	1988	2422	1326	1074	790	2782	2604	2264	3212	2484	3752	1916	1992	1770	2186	2042	2112	77076	2206.67	212.314	1986.89	430.472	2238	279.213	1671.67	705.998	2849.67	545.369	2003	147.56
2.4.1.352	1386	1282	1276	2004	1790	2470	2534	2486	2992	2208	2500	2398	2376	2092	1632	1548	1504	1612	2080	1822	2096	2156	1186	904	3240	3106	3112	2914	2550	3882	1990	1896	1838	1908	2200	1944	76914	1314.67	61.8493	2375.78	344.822	1794	355.39	1707.33	533.203	3134	438.512	1962.67	126.805
3.4.25.1	1558	1160	1250	2168	1600	2058	1922	2130	1840	1948	1944	1852	1966	1422	1362	1532	958	1492	1404	1304	1898	2372	1488	1604	2082	2130	2238	1630	2274	2490	4020	3796	3820	4180	4516	3464	76872	1322.67	208.714	1940.22	171.667	1455.33	324.088	1678.33	396.627	2140.67	287.618	3966	361.506
3.5.1.103	1752	1350	1268	1890	1786	2108	2314	2182	2152	2184	2338	2324	2634	2040	1586	1886	1218	1724	1324	1268	1938	1950	1092	670	2496	2548	2614	1890	2498	2790	3210	2772	2816	3604	3720	2870	76806	1456.67	259.032	2142	192.349	1848	476.87	1373.67	497.744	2472.67	305.626	3165.33	416.184
1.9.6.1	2846	2528	2390	2510	2106	2746	2414	2762	2352	2604	2644	2480	2290	2062	1510	1844	1666	1934	1230	1184	1370	1010	1826	1596	2148	2114	2218	1108	1318	1614	2712	2714	2548	2606	2716	2674	76394	2588	233.846	2513.11	207.425	1884.33	278.575	1369.33	297.592	1753.33	474.793	2661.67	69.8503
1.8.7.1	866	972	822	2894	2508	2862	2644	3374	2530	3088	2952	3060	2658	1738	1442	1786	1438	1948	932	922	1332	1558	1290	1316	1520	1566	1542	1280	2010	1824	3400	2938	3212	3556	3604	2910	76294	886.667	77.106	2879.11	283.279	1835	450.326	1225	250.001	1623.67	256.217	3270	301.144
1.1.5.9	1512	1056	1132	3464	3078	3386	3250	4030	2612	3680	3642	3274	1924	1558	1390	1284	1102	1508	1404	1146	1554	1542	1734	1430	2684	2840	2882	2116	2352	2796	1566	1422	1612	1436	1368	1438	76204	1233.33	244.306	3379.56	402.709	1461	279.728	1468.33	196.393	2611.67	309.043	1473.67	94.0078
2.8.3.1	2158	1544	1716	2224	1854	2226	2154	2582	2130	2090	2224	2188	2786	2124	1730	1610	1498	1420	1706	1566	1858	1700	2050	1744	2576	2656	2706	2240	2740	3108	2198	2122	2244	2256	2024	2208	75960	1806	316.74	2185.78	188.715	1861.33	515.986	1770.67	165.789	2671	279.988	2175.33	87.8058
3.1.21.2	1942	1450	1470	2582	2230	2642	2608	2790	2744	2796	2884	2624	2682	2320	1696	2250	2142	2188	1386	1204	1510	1310	1320	1202	2492	2240	2416	3032	2074	3176	1716	1590	1550	1908	1998	1748	75912	1620.67	278.462	2655.56	189.657	2213	318.036	1322	116.544	2571.67	439.404	1751.67	175.049
1.7.1.4	1412	1472	1260	2702	2502	3108	3166	3386	3166	3282	3218	3470	2506	1678	1738	2058	2034	2190	976	892	982	888	964	742	2518	2468	2498	2276	1864	2632	1718	1682	1792	1972	2626	1924	75762	1381.33	109.276	3111.11	314.129	2034	303.989	907.333	91.0443	2376	276.113	1952.33	348.917
1.14.13.149	3112	2210	2424	2168	1894	2224	2074	2214	2052	2314	2258	2170	3896	2634	2116	2798	2724	2412	1294	1038	1352	2228	1868	1832	1766	1744	1892	1402	2032	2036	1952	1652	1836	1942	2418	1682	75660	2582	471.3	2152	127.346	2763.33	607.435	1602	445.195	1812	236.565	1913.67	277.415
3.7.1.5	1736	1316	1324	2480	2290	2682	2670	3100	2506	3204	3422	2908	2440	2058	1446	1778	1820	1810	1306	1238	1462	1834	1346	1098	2608	2504	2644	2670	2374	3000	1702	1516	1332	1728	2262	1798	75412	1458.67	240.211	2806.89	376.015	1892	332.169	1380.67	252.649	2633.33	210.012	1723	313.797
1.1.1.2	970	1170	924	1974	1604	2018	1944	2366	2160	2012	2010	2208	1768	1412	1304	1636	1936	1568	1984	1672	1846	2012	1504	1138	3894	3772	3756	3394	3280	4474	1886	1726	1880	1802	2382	1866	75252	1021.33	130.787	2032.89	210.44	1604	230.783	1692.67	332.878	3761.67	422.434	1923.67	232.635
2.7.7.53	1550	1172	1160	1630	1490	1766	1764	2014	1832	2126	2028	1854	2130	1808	1242	1852	1822	1448	1724	1540	1812	1904	1250	972	2840	2382	2642	2898	2586	3720	2858	2754	2672	3160	3752	2870	75024	1294	221.784	1833.78	201.612	1717	318.147	1533.67	359.672	2844.67	467.144	3011	398.884
1.1.1.412	1294	990	996	1868	1684	1884	1918	2188	1946	2176	2022	1726	2416	1962	1514	1812	1744	1450	1474	1422	1908	2018	1356	962	3114	2744	3044	3672	3432	4192	2394	2104	2252	2512	2550	2192	74932	1093.33	173.808	1934.67	174.585	1816.33	349.764	1523.33	386.901	3366.33	516.593	2334	179.849
1.1.1.178	1894	1492	1300	2224	1926	2264	2010	2572	1818	2066	1932	2310	2598	1812	1742	2042	1384	1756	1650	1354	1712	2266	1632	1572	2528	2384	2628	2016	2936	2894	2304	2158	2168	2468	2768	2320	74900	1562	303.124	2124.67	237.424	1889	406.532	1697.67	304.53	2564.33	342.164	2364.33	228.219
4.2.1.5	2004	1492	1626	2320	1950	2260	2240	2552	2128	2338	2624	2412	2382	1758	1500	1432	1170	1310	1746	1598	1826	2038	1450	1308	3166	3084	3002	2252	2774	3294	1982	1762	1898	2030	2044	1794	74546	1707.33	265.513	2313.78	205.683	1592	434.357	1661	264.453	2928.67	374.46	1918.33	120.522
2.7.7.70	1628	1432	1408	1872	1568	2064	2254	2342	2010	2310	2510	2088	1904	1606	1548	1440	2000	1428	1754	1522	1794	1598	1666	1382	2998	2956	3016	3358	3016	4198	2182	2046	1876	1994	1830	1876	74474	1489.33	120.687	2113.11	282.286	1654.33	241.92	1619.33	153.021	3257	483.637	1967.33	133.06
1.5.3.10	1970	1564	1500	2408	2206	2796	2626	2910	2722	2520	2550	2744	2950	2248	1658	1754	1262	1538	1426	1130	1514	1528	1846	1852	2532	2782	2930	2016	2358	2940	1590	1486	1428	1744	1762	1576	74366	1678	254.896	2609.11	215.367	1901.67	606.886	1549.33	272.9	2593	363.751	1597.67	134.316
1.14.13.40	2156	1546	1608	3024	2274	2766	2896	3330	2208	3166	3042	2824	2922	2276	2014	2036	1744	1910	1002	920	1142	1416	1838	1708	1474	1350	1514	1220	1576	1718	2346	2068	2200	2292	2710	2100	74336	1770	335.72	2836.67	379.075	2150.33	416.122	1337.67	379.215	1475.33	174.024	2286	233.636
4.1.3.24	1006	1150	790	2342	2090	2242	2268	2656	2126	2508	2362	2240	2384	1644	1230	1426	1246	1356	1600	1378	1672	1698	1580	1418	2300	2142	2338	1946	2326	2916	2992	2812	2818	3046	3274	2702	74024	982	181.196	2314.89	178.877	1547.67	436.391	1557.67	131.79	2328	324.7	2940.67	206.594
2.4.1.349	1278	1108	956	2062	1832	2110	2218	2158	2428	2232	2268	2066	3650	2840	2044	2196	2180	1578	1132	1170	1412	1300	664	640	2884	2642	2574	3082	2680	3802	2108	1944	1948	2114	2444	2242	73986	1114	161.084	2152.67	165.861	2414.67	727.633	1053	326.101	2944	459.697	2133.33	189.491
1.14.15.28	934	774	674	3030	2704	3104	2840	3276	2412	2920	3108	3116	2090	1402	1422	1402	746	1408	1296	1156	1642	2006	1108	954	2640	2730	2910	1978	2914	2948	1954	1924	2024	2066	2434	1890	73936	794	131.149	2945.56	262.606	1411.67	425.101	1360.33	392.655	2686.67	367.727	2048.67	199.534
2.7.1.121	792	906	730	1908	1598	2126	2064	2374	2264	1914	1930	2362	3366	2346	1858	2096	1920	1762	1278	1204	1382	1530	868	724	3790	3532	3558	3052	2804	4142	1804	1820	1786	2058	2226	2004	73878	809.333	89.2711	2060	252.624	2224.67	595.86	1164.33	308.963	3479.67	486.475	1949.67	176.56
4.1.1.35	1428	1198	1214	2670	2184	2384	2306	2786	2296	2676	2634	2472	2370	1990	1670	1750	1878	1552	1562	1268	1480	1778	1808	1336	2454	2192	2444	2832	2570	2970	1994	1792	1876	2030	2174	1796	73814	1280	128.421	2489.78	209.772	1868.33	289.818	1538.67	222.774	2577	283.043	1943.67	149.952
5.1.1.17	2644	1584	2214	1852	1576	1938	2098	2284	1978	2096	2250	1954	3340	2464	2214	2280	1972	1804	1324	1156	1436	1740	1256	982	2410	2046	2092	2444	2528	3206	2198	1938	2052	2072	2276	2082	73780	2147.33	533.135	2002.89	215.065	2345.67	539.885	1315.67	258.842	2454.33	417.259	2103	118.475
2.7.1.5	906	944	728	2456	2166	2852	2620	2978	2968	2736	2982	3278	2578	2030	1412	1586	1414	1444	1054	1128	1468	1416	690	632	3274	3254	3334	3154	2874	3982	1640	1486	1510	1558	1682	1538	73752	859.333	115.314	2781.78	331.289	1744	471.474	1064.67	351.515	3312	366.333	1569	76.501
3.1.1.120	1446	1050	1102	3054	2652	3130	3032	3460	2656	3032	3232	3124	2690	1880	1424	1718	1268	1446	1306	1356	1558	1820	1370	1156	2258	2360	2590	2038	2580	2908	1352	1332	1304	1416	1716	1384	73200	1199.33	215.196	3041.33	256.595	1737.67	516.067	1427.67	231.508	2455.67	303.572	1417.33	151.466
3.4.17.14	1830	1376	1470	1954	1672	2116	1962	1964	1916	1712	1928	2008	2704	1874	1630	1968	2076	1626	1662	1480	1544	2324	1602	1112	3276	3462	3222	2850	2722	3524	1726	1688	1554	1862	2034	1648	73078	1558.67	239.636	1914.67	139.467	1979.67	398.143	1620.67	395.257	3176	324.779	1752	171.123
1.1.1.79	2404	1482	1706	2574	2204	2480	2606	2854	2272	2288	2370	2400	2696	1984	1668	1880	1614	1574	1380	1164	1442	1826	1518	1490	2048	2038	2130	1672	2130	2452	2088	1746	2014	2086	2796	1938	73014	1864	480.878	2449.78	203.461	1902.67	420.22	1470	215.388	2078.33	250.048	2111.33	358.592
2.3.2.5	1926	1334	1536	2048	1710	2050	2144	2482	2408	2364	2612	2384	2746	2158	1704	2132	2600	1582	1238	1190	1322	1414	1002	698	2630	2634	2678	3066	2632	3352	1886	1836	1760	1810	1970	1838	72876	1598.67	300.934	2244.67	279.322	2153.67	464.664	1144	258.695	2832	306.229	1850	71.744
1.1.1.81	2406	1490	1736	2452	2098	2298	2442	2722	2038	2092	2240	2260	2568	1942	1620	1858	1582	1466	1396	1160	1482	1796	1512	1444	2184	2120	2264	2080	2302	2768	2144	1766	2052	2116	2886	1944	72726	1877.33	474.073	2293.56	217.628	1839.33	398.886	1465	205.079	2286.33	250.383	2151.33	385.324
1.3.3.3	2374	1726	1948	1740	1462	1830	1866	2062	1628	1788	2026	1992	2716	1866	1742	1852	1952	1500	1738	1380	1590	2664	1954	1698	2414	2506	2524	1826	2400	2384	2210	2022	2190	2218	2800	2098	72686	2016	329.308	1821.56	195.33	1938	411.903	1837.33	446.452	2342.33	259.456	2256.33	276.973
2.4.2.45	1926	1318	1334	2438	2002	2364	2330	2690	2258	2224	2340	2358	2730	1904	1718	1894	1882	1738	1302	1204	1560	1678	1322	986	2388	2262	2374	3102	2488	3534	1764	1756	1772	1804	1840	1952	72536	1526	346.503	2333.78	182.75	1977.67	377.479	1342	248.274	2691.33	509.336	1814.67	74.0882
2.1.1.173	1970	1670	1748	1268	1194	1672	1630	1778	1776	1546	1626	1614	3210	2316	2094	2666	3406	1876	1212	1020	1182	1784	1068	848	2568	2368	2678	3444	3014	3738	1922	1752	1852	2098	2790	2074	72472	1796	155.653	1567.11	205.505	2594.67	614.295	1185.67	320.63	2968.33	533.983	2081.33	371.209
5.5.1.19	1242	980	1060	1118	1134	1430	1420	1328	1624	1338	1268	1350	2164	1886	1480	1848	1804	1350	1802	1692	1976	2856	1268	960	2596	2496	2614	2392	2674	3224	3514	3062	3198	3340	3774	3140	72402	1094	134.268	1334.44	154.932	1755.33	295.006	1759	653.654	2666	290.864	3338	266.854
2.4.1.187	1300	1034	956	1700	1342	1610	1810	1990	1882	1718	2034	1824	2318	1782	1396	1496	1576	1198	1656	1592	1594	4050	1260	1208	3278	3018	2986	2558	2706	3588	2344	2202	2250	2316	2368	2104	72044	1096.67	180.359	1767.78	209.613	1627.67	389.53	1893.33	1073.19	3022.33	374.795	2264	99.559
3.5.1.84	1344	1410	1298	3184	2754	3172	3188	3638	2684	3416	3282	3074	2554	1854	1540	1788	1576	1782	1202	962	1330	1220	1658	1302	2236	2088	2144	1902	1842	2592	1356	1096	1278	1438	1452	1368	72004	1350.67	56.2968	3154.67	297.691	1849	367.497	1279	226.57	2134	268.876	1331.33	131.238
4.99.1.12	1592	1438	1342	1862	1730	1952	2178	2324	2160	2324	2608	2098	2002	1752	1522	1872	1826	1684	1736	1404	1516	1296	1352	1182	2670	2272	2306	3478	2670	4126	1968	1792	1870	2058	2086	1840	71888	1457.33	126.116	2137.33	267.163	1776.33	165.135	1414.33	192.759	2920.33	733.171	1935.67	120.595
1.5.1.3	2158	1576	1682	1712	1392	2022	1914	2192	1904	1836	2016	1964	2508	1890	1610	1914	2474	1684	1480	1164	1326	1630	1290	1172	2810	2652	2684	2456	2542	3454	1980	1764	1904	2002	2426	1910	71094	1805.33	309.983	1883.56	227.206	2013.33	388.104	1343.67	181.942	2766.33	358.127	1997.67	225.769
2.6.1.83	1918	1590	1736	1642	1594	1972	2066	2304	2258	2256	2398	2122	2274	1922	1478	2164	2548	1762	2294	1916	2204	2176	1584	1144	2008	1678	1810	3064	2316	3332	1522	1564	1620	1598	1524	1654	71012	1748	164.329	2068	285.991	2024.67	383.102	1886.33	445.95	2368	683.152	1580.33	53.2078
4.2.1.96	1844	1330	1408	2008	1724	2144	2208	2268	2154	2088	2192	2172	2580	2028	1634	1936	1824	1836	1312	1148	1346	1984	1254	1078	2376	2102	2402	2186	2308	2658	2244	2230	2006	2428	2392	2100	70932	1527.33	277.001	2106.44	161.244	1973	325.187	1353.67	324.758	2338.67	193.72	2233.33	162.882
1.6.3.5	1478	1066	1024	766	754	912	1028	1138	1034	908	962	884	2674	1964	1528	1638	1520	1052	2028	1816	2314	3378	1538	1490	3186	3172	3286	2444	3230	3818	2930	2538	2504	2928	3198	2774	70902	1189.33	250.873	931.778	125.238	1729.33	547.529	2094	700.378	3189.33	438.646	2812	263.727
7.3.2.6	1836	1438	1364	1942	1644	2180	2184	2320	2190	1996	2296	2066	2294	1934	1468	2278	2202	1732	1892	1604	1620	1402	1332	984	2678	2402	2500	2532	2164	3186	1896	1786	1746	1994	1938	1824	70844	1546	253.858	2090.89	209.91	1984.67	335.356	1472.33	309.313	2577	343.578	1864	94.8768
3.5.1.49	1730	1324	1294	2802	2642	2934	2992	3616	2466	3140	3280	2964	2160	1606	1460	1240	880	1506	1926	1578	2310	2272	2074	1608	1752	1768	1902	1296	1764	1934	1446	1300	1344	1358	1672	1484	70824	1449.33	243.527	2981.78	341.451	1475.33	423.514	1961.33	317.431	1736	229.096	1434	134.996
1.13.11.27	2994	1904	2122	1756	1430	1616	1618	1962	1636	1800	1688	1748	3574	2556	2118	2688	2956	1910	1620	1226	1546	2388	1748	1806	1708	1406	1450	1568	1880	1938	1974	1910	2068	1950	2548	1932	70742	2340	576.774	1694.89	147.804	2633.67	597.782	1722.33	384.365	1658.33	221.383	2063.67	243.519
3.5.3.1	2104	1478	1776	2196	1826	2414	2382	2594	2578	2776	2740	2444	3296	2184	1886	2134	2234	1876	1264	1066	1302	1306	1212	1162	1774	1694	1624	1994	1704	2462	1798	1790	1712	1840	2068	1750	70440	1786	313.12	2438.89	292.881	2268.33	525.84	1218.67	92.9401	1875.33	314.303	1826.33	126.183
3.5.1.44	1028	1410	1170	1982	1930	2370	2224	2518	2482	2190	2384	2174	2250	1970	2120	2598	3176	2542	1588	1482	1268	1478	1414	1054	1946	1736	1718	3904	3210	3504	1330	1172	1254	1294	1296	1232	70398	1202.67	193.084	2250.44	206.845	2442.67	432.764	1380.67	191.439	2669.67	981.096	1263	56.3241
3.6.1.23	1752	1456	1436	1562	1344	1654	1654	1898	1592	2046	1808	1860	2334	1644	1496	2028	2532	1488	1428	1226	1422	1960	1396	1006	2456	2324	2404	2720	2716	3502	2400	2142	2080	2364	2700	2338	70168	1548	176.952	1713.11	211.043	1920.33	447.254	1406.33	316.277	2687	431.596	2337.33	219.336
3.7.1.9	1142	832	804	1806	1414	1950	1938	1906	1912	1860	2078	2034	2254	1426	1228	1742	1460	1456	1434	1276	1692	1930	1184	1064	2916	2846	2898	2528	2518	3354	2578	2312	2370	2726	3018	2282	70168	926	187.585	1877.56	192.309	1594.33	362.404	1430	327.673	2843.33	308.004	2547.67	286.921
2.1.1.220	1176	1046	1078	1486	1304	1740	1762	1768	1772	1742	1906	1884	1968	1536	1240	1572	1266	1670	1294	1218	1702	1832	932	844	2148	1990	2138	1456	2210	2206	3926	3516	3310	3918	4042	3382	69980	1100	67.7348	1707.11	192.18	1542	270.62	1303.67	398.665	2024.67	289.782	3682.33	316.472
2.1.1.219	1176	1046	1078	1486	1304	1740	1762	1768	1772	1742	1906	1884	1968	1536	1240	1572	1266	1670	1294	1218	1702	1832	932	844	2148	1990	2138	1456	2210	2206	3926	3516	3310	3918	4042	3382	69980	1100	67.7348	1707.11	192.18	1542	270.62	1303.67	398.665	2024.67	289.782	3682.33	316.472
1.2.1.5	1340	810	1054	850	892	1074	1142	1094	1266	1014	1066	1102	1190	1182	892	810	642	786	1466	1484	2192	2394	1104	974	1974	1980	1914	1354	1930	2032	5354	4900	4940	5348	5694	4732	69972	1068	265.277	1055.56	125.785	917	223.434	1602.33	574.486	1864	253.273	5161.33	362.577
2.4.2.53	2116	1416	1634	1728	1624	2026	2296	2312	2286	2168	2472	2168	2210	1544	1218	1862	2272	1482	1360	1304	1536	1794	1220	978	2668	2848	2604	3100	2528	3794	1576	1570	1408	1588	1652	1590	69952	1722	358.201	2120	281.164	1764.67	422.521	1365.33	278.504	2923.67	472.949	1564	81.8682
1.5.8.2	2632	1654	1942	2252	1764	1862	1850	2096	1818	2142	2056	1926	2616	1962	1630	1620	1220	1530	1040	888	1212	794	2174	1868	1304	1170	1232	820	1106	1164	3520	3110	3182	3772	4020	2964	69912	2076	502.581	1974	167.994	1763	480.518	1329.33	562.576	1132.67	167.373	3428	413.328
1.5.8.1	2632	1654	1942	2252	1764	1862	1850	2096	1818	2142	2056	1926	2616	1962	1630	1620	1220	1530	1040	888	1212	794	2174	1868	1304	1170	1232	820	1106	1164	3520	3110	3182	3772	4020	2964	69912	2076	502.581	1974	167.994	1763	480.518	1329.33	562.576	1132.67	167.373	3428	413.328
6.3.1.20	1396	1118	1008	1686	1576	1940	1954	1966	1810	1970	1956	1970	3004	2352	1514	2232	2542	1492	1162	840	1144	1448	986	822	3004	2748	2762	3576	3008	4098	1806	1594	1542	1776	2054	1674	69530	1174	199.97	1869.78	146.825	2189.33	593.074	1067	235.894	3199.33	532.767	1741	183.912
3.6.1.69	1488	1160	1158	1736	1520	1706	1762	1986	1616	1760	1784	1798	2042	1390	1144	1376	1262	1240	1386	1240	1394	2072	1208	892	2322	2278	2468	2170	2294	3014	3184	2838	2774	3508	3744	2774	69488	1268.67	189.951	1740.89	128.277	1409	323.275	1365.33	391.186	2424.33	304.359	3137	415.027
1.8.3.4	1380	1036	1086	3326	2880	3100	3182	3764	2908	3222	3382	2934	2530	1996	1576	1692	1204	1760	1188	994	1252	1062	1794	1620	1430	1428	1418	1212	1594	1806	1484	1374	1402	1596	1514	1718	68844	1167.33	185.864	3188.67	281.773	1793	444.9	1318.33	319.233	1481.33	200.067	1514.67	127.578
2.3.1.79	1426	1102	990	1454	1324	1682	1674	2010	1846	1726	2090	1956	1860	1362	1218	1242	1236	1022	1340	1108	1556	1786	974	666	2854	2748	2684	2336	2252	3060	2908	2538	2652	3142	4132	2866	68822	1172.67	226.427	1751.33	253.699	1323.33	284.832	1238.33	406.352	2655.67	308.961	3039.67	574.998
1.11.1.9	2128	1538	1530	1230	1012	1202	1192	1354	1172	1088	1218	1290	2688	1694	1636	2240	2550	1446	1286	1104	1390	1896	1266	1240	2884	2658	2890	2670	2814	3182	2478	2212	2304	2618	3220	2458	68778	1732	342.969	1195.33	100.985	2042.33	520.719	1363.67	276.537	2849.67	191.593	2548.33	358.306
1.1.98.3	1342	1034	950	2252	1824	2466	2348	2440	2130	2300	2322	2212	2258	1818	1504	1550	1448	1570	1406	1138	1582	1660	1362	1030	2588	2514	2574	2218	2470	2884	1940	1832	1770	1956	2284	1766	68742	1108.67	206.391	2254.89	192.728	1691.33	305.338	1363	244.759	2541.33	214.963	1924.67	193.918
3.1.1.75	1816	1292	1394	2622	2208	2696	2610	3450	2244	2794	2624	2710	2158	1526	1302	1666	1390	1560	1258	1030	1108	1672	1422	1100	1926	1698	1890	1530	2036	2252	1956	1706	1774	2126	2392	1734	68672	1500.67	277.808	2662	358.541	1600.33	301.894	1265	243.904	1888.67	253.025	1948	269.637
2.7.11.33	2038	1682	1552	1992	1648	2096	2038	2260	2012	1844	2094	1968	2582	1854	1634	1834	1974	1646	1318	1084	1394	1298	1582	1122	2058	1842	1888	1968	2208	2482	2140	2026	2098	2292	2786	2142	68476	1757.33	251.606	1994.67	171.869	1920.67	349.222	1299.67	182.772	2074.33	238.466	2247.33	277.871
2.7.4.28	2038	1682	1552	1992	1648	2096	2038	2260	2012	1844	2094	1968	2582	1854	1634	1834	1974	1646	1318	1084	1394	1298	1582	1122	2058	1842	1888	1968	2208	2482	2140	2026	2098	2292	2786	2142	68476	1757.33	251.606	1994.67	171.869	1920.67	349.222	1299.67	182.772	2074.33	238.466	2247.33	277.871
4.3.99.3	1972	1650	1556	1910	1502	1744	2088	2370	1888	2112	2244	2110	2052	1642	1548	2020	2414	1714	1310	1086	1302	1568	1354	1334	2280	2136	2302	2906	2594	3192	1668	1658	1722	1614	2130	1720	68412	1726	218.165	1996.44	265.258	1898.33	324.576	1325.67	153.521	2568.33	411.003	1752	189.602
4.1.1.86	1230	1094	892	1260	1020	1408	1308	1496	1420	1320	1430	1548	1892	1614	1352	1328	1356	1216	1564	1698	1972	2654	1188	926	2272	2292	2444	2342	2838	2844	3198	2766	2828	3288	3934	2842	68074	1072	170.071	1356.67	155.904	1459.67	248.909	1667	609.473	2505.33	266.742	3142.67	443.099
2.5.1.144	2204	1460	1720	2010	1864	2406	2328	2362	2162	2298	2652	2330	2424	1918	1472	1924	1946	1838	1160	1136	1398	1420	1182	1282	2420	2312	2364	1838	1900	2298	1584	1468	1432	1636	2100	1774	68022	1794.67	377.578	2268	230.406	1920.33	304.02	1263	123.721	2188.67	252.078	1665.67	245.603
2.7.1.20	2088	1692	1672	1362	1334	1512	1528	1648	1712	1498	1664	1344	2858	2154	1676	2022	1966	1544	1460	1294	1630	1184	994	950	2274	1958	1952	1840	1804	2398	2902	2690	2906	2900	2898	2630	67938	1817.33	234.617	1511.33	143.377	2036.67	461.815	1252	264.69	2037.67	242.096	2821	126.173
3.1.1.11	1060	966	736	2188	2094	3004	2630	3092	2764	2262	2290	3080	1818	1350	1148	1634	1636	1682	878	758	1000	1056	702	654	2970	3086	3066	4036	3780	4246	1054	1012	1020	890	1202	958	67802	920.667	166.689	2600.44	403.051	1544.67	247.036	841.333	163.74	3530.67	558.072	1022.67	104.924
2.5.1.78	1848	1266	1458	1774	1514	1840	1822	2130	1596	1876	2060	1884	2098	1716	1580	2016	2138	1642	1502	1092	1314	1906	1342	1060	1982	1938	1972	2528	2230	2878	2448	2080	2124	2298	2574	2146	67672	1524	296.56	1832.89	195.502	1865	246.89	1369.33	310.49	2254.67	379.049	2278.33	198.625
1.3.8.8	2044	1462	1542	1526	1488	1792	1590	1906	1542	1428	1452	1710	2708	1616	1466	1958	1674	1592	1344	1192	1454	2216	1350	1104	2066	2058	2232	1422	2306	2232	2798	2484	2480	2618	3462	2308	67622	1682.67	315.47	1603.78	164.105	1835.67	457.46	1443.33	398.503	2052.67	324.483	2691.67	411.163
3.4.11.14	2536	2004	1904	2006	1816	2050	2064	2320	1848	2270	2196	2072	2230	1686	1754	1216	1020	1254	1512	1204	1572	1896	1532	1220	2594	2638	2624	2234	2838	3064	1400	1366	1402	1422	1416	1420	67600	2148	339.718	2071.33	172.009	1526.67	447.061	1489.33	256.321	2665.33	276.529	1404.33	20.9157
1.14.13.107	1282	978	802	3364	2730	2976	3072	3594	2464	3300	3112	3068	2690	1712	1490	1346	860	1514	964	948	1408	1690	1382	1020	1680	1600	1830	1178	1860	1934	1618	1566	1546	1654	1806	1560	67598	1020.67	242.828	3075.56	336.727	1602	605.348	1235.33	303.512	1680.33	274.889	1625	97.5684
3.1.3.93	2132	1328	1548	1906	1392	1666	1824	2218	1816	1896	1858	1718	2274	1514	1232	1984	2510	1430	1424	1140	1242	1550	1512	1130	2590	2380	2374	3380	2628	3718	1750	1608	1640	1800	1670	1762	67544	1669.33	415.506	1810.44	220.662	1824	509.999	1333	186.628	2845	565.426	1705	76.3649
1.1.1.34	1246	1144	938	1230	1170	1466	1530	1634	1466	1272	1364	1342	2484	1734	1460	1914	2138	1260	1436	1236	1650	2246	1578	1500	2990	2650	2870	2810	2946	3412	2148	2258	2288	2358	2344	2012	67524	1109.33	156.899	1386	150.602	1831.67	447.356	1607.67	343.319	2946.33	257.286	2234.67	132.397
2.3.1.174	2524	1772	1904	1814	1678	1796	1910	2134	2046	2236	2118	2028	3016	2508	1996	2362	2382	2080	990	816	1028	1504	1252	1226	1836	1510	1650	1618	1762	1986	1738	1476	1806	1896	3196	1868	67462	2066.67	401.524	1973.33	184.415	2390.67	362.762	1136	241.81	1727	170.344	1996.67	606.539
3.4.15.6	1614	1224	1240	1064	964	1148	1270	1330	1356	1134	1222	1402	2876	1914	1698	2330	2280	1664	1312	1138	1272	2212	1190	1158	2170	1920	2064	2790	2634	3400	2866	2682	2542	2926	2944	2480	67430	1359.33	220.693	1210	144.817	2127	462.471	1380.33	412.907	2496.33	556.304	2740	201.125
3.5.4.3	1880	1454	1530	1486	1218	1590	1682	2090	1742	1610	1636	2044	2420	1660	1418	1796	1700	1530	1308	1118	1464	2288	1384	1492	2114	2226	2116	1794	2252	2430	2172	2090	2160	2448	3476	2410	67228	1621.33	227.212	1677.56	267.022	1754	352.177	1509	404.49	2155.33	211.47	2459.33	518.602
2.8.2.20	964	782	746	1676	1418	1792	1728	1724	1646	1774	1974	1688	2206	1884	1316	1576	1454	1264	1340	1168	1458	1400	990	1072	3042	3128	3046	2364	2470	3312	2684	2396	2246	2442	2704	2244	67118	830.667	116.865	1713.33	146.602	1616.67	363.777	1238	189.213	2893.67	383.448	2452.67	203.107
2.6.1.82	2086	1516	1420	1258	1176	1536	1586	1640	1746	1416	1636	1524	1776	1660	1392	1450	1464	1342	1136	1078	1694	1342	986	748	2246	2104	2080	2764	2276	3234	3042	2690	2654	3116	3450	2756	67020	1674	360.017	1502	186.561	1514	167.943	1164	324.193	2450.67	456.455	2951.33	309.471
3.2.1.3	1420	1042	1208	2082	1858	2298	2522	2606	2382	2458	2578	2476	2530	2020	1442	2220	2582	2208	918	826	1000	1338	836	594	2434	2092	2196	2354	2112	3240	1520	1410	1514	1614	1606	1452	66988	1223.33	189.466	2362.22	247.718	2167	413.695	918.667	246.287	2404.67	430.852	1519.33	81.2273
2.4.1.7	604	706	596	992	898	1276	1136	1328	1260	1110	1114	1560	996	700	728	686	738	670	1832	1784	1882	2892	1668	1156	4496	4234	4822	2902	3592	3802	2704	2432	2252	2582	2510	2274	66914	635.333	61.3297	1186	196.105	753	121.726	1869	566.403	3974.67	690.489	2459	176.385
1.1.1.41	1562	1160	1236	2374	1932	2212	2362	2572	1998	2676	2896	2416	2032	1866	1476	1844	2070	1814	1206	1054	1124	1002	1398	1306	2034	1914	1900	3482	2314	3560	1286	1348	1258	1498	1392	1320	66894	1319.33	213.563	2382	309.679	1850.33	211.181	1181.67	151.496	2534	779.248	1350.33	86.1758
5.3.1.14	1144	892	934	2140	1838	2542	2474	2620	2702	2334	2356	2830	2352	1560	1310	1292	1282	1390	986	980	1292	1244	760	718	3160	2670	3026	3142	2784	3880	1388	1202	1206	1472	1540	1436	66878	990	135.011	2426.22	302.839	1531	415.386	996.667	237.678	3110.33	425.054	1374	140.718
4.2.1.25	2640	1784	2084	3142	2700	2882	2878	3556	2510	3342	3252	3030	2532	1798	1472	1238	1004	1514	990	756	1028	1270	1080	1154	1390	1246	1406	1000	1274	1482	1428	1358	1496	1672	1630	1510	66528	2169.33	434.333	3032.44	327.891	1593	532.461	1046.33	173.525	1299.67	170.91	1515.67	118.723
2.7.1.170	2106	1652	1924	1598	1410	1700	1776	2016	1562	1834	1818	1728	2344	1478	1304	1872	2188	1466	1550	1288	1504	2376	1706	1466	2126	2078	2116	2312	2702	2714	1756	1632	1664	1624	2352	1772	66514	1894	228.482	1715.78	176.636	1775.33	426.443	1648.33	381.159	2341.33	295.401	1800	277.532
2.4.1.117	1332	1192	1174	1694	1454	1986	1982	2036	2202	2112	2474	2122	2114	1808	1556	1518	1414	1294	1344	1254	1632	1358	1040	834	2800	2534	2678	2812	2376	3158	1856	1846	1830	1930	2002	1762	66510	1232.67	86.4947	2006.89	292.841	1617.33	297.506	1243.67	276.895	2726.33	268.761	1871	83.7305
2.7.7.83	1558	1198	1278	1858	1542	1784	1976	2006	2040	1806	2072	1744	3046	2264	1888	2910	3306	2294	1166	1118	1320	1142	856	772	2198	2008	1936	3112	2330	3546	1406	1238	1340	1422	1464	1524	66468	1344.67	189.033	1869.78	171.22	2618	548.632	1062.33	206.616	2521.67	655.15	1399	99.8299
2.1.3.9	2028	1510	1596	1378	1294	1602	1648	1714	1678	1800	1952	1564	2582	1832	1610	1698	1664	1314	1708	1498	1658	1924	1698	1480	2256	2076	2292	2770	2568	3282	1832	1820	1764	1806	1674	1702	66272	1711.33	277.592	1625.56	201.131	1783.33	427.101	1661	162.534	2540.67	438.566	1766.33	65.4757
3.5.1.119	1172	1032	854	1840	1692	1742	1874	1960	1718	1654	1662	1792	1964	1408	1272	1216	656	1242	1314	1192	1660	2040	1286	1094	1956	2170	2170	1564	2498	2338	3054	2826	2838	3256	3320	2670	65996	1019.33	159.378	1770.44	104.277	1293	419.096	1431	354.606	2116	325.989	2994	259.251
1.1.1.159	940	832	672	2316	1856	2282	2100	2334	1766	2180	2264	2312	1966	1364	1252	1726	1500	1590	1180	1178	1466	1818	888	912	2482	2400	2384	1742	2362	2634	2266	2078	2096	2352	2454	1980	65924	814.667	134.838	2156.67	210.644	1566.33	256.878	1240.33	353.296	2334	306.597	2204.33	182.189
2.7.7.33	1110	742	828	2066	1790	2030	2078	2402	2060	2164	2300	2100	2600	1770	1592	1672	1650	1282	1348	1104	1356	1926	1230	858	2808	2684	2572	2000	2134	2762	1910	1684	1652	1892	1926	1808	65890	893.333	192.503	2110	172.714	1761	443.226	1303.67	356.627	2493.33	342.414	1812	119.164
1.13.11.5	2258	1402	1562	1858	1574	1832	1784	2268	1682	1894	1930	1884	3554	2516	2128	2410	2874	2090	1078	940	1158	1796	1480	1388	1356	1258	1388	1344	1656	1902	2062	1934	1942	1902	1914	1838	65836	1740.67	455.11	1856.22	191.38	2595.33	549.746	1306.67	311.429	1484	245.187	1932	73.5717
1.14.14.46	1116	748	828	2146	1882	2236	1902	2476	1864	2252	2062	2032	2364	1876	1822	1504	1218	1442	1096	990	1274	1664	1016	888	2114	2210	2144	1460	2128	2218	2706	2328	2204	2578	2800	2156	65744	897.333	193.549	2094.67	204.123	1704.33	405.943	1154.67	280.912	2045.67	290.113	2462	270.33
6.3.4.20	1690	1334	1314	1876	1552	1934	2124	2326	1782	2020	2114	2016	2400	1718	1374	1760	1882	1380	1330	1064	1324	1560	1314	1168	2208	2204	2206	2620	2386	2976	1688	1554	1740	1812	2242	1700	65692	1446	211.547	1971.56	222.481	1752.33	379.287	1293.33	168.597	2433.33	311.968	1789.33	237.27
1.13.11.79	1416	1062	1088	2050	1744	2228	2096	2362	2052	2244	1980	2064	2032	1526	1378	1444	1132	1500	1464	1204	1518	1540	1154	1094	2690	2416	2560	3092	3084	3766	1414	1394	1308	1574	1598	1354	65622	1188.67	197.305	2091.11	177.59	1502	295.675	1329	199.971	2934.67	491.41	1440.33	118.77
5.4.99.9	1196	932	1168	1660	1470	1766	1560	2158	1670	2266	2198	2238	2294	1796	1630	1576	1468	1800	1092	1096	1304	1738	1040	796	2000	2118	2174	2708	2230	3112	2228	1984	1992	2354	2724	2076	65612	1098.67	145.015	1887.33	322.312	1760.67	291.228	1177.67	318.924	2390.33	429.126	2226.33	282.917
2.4.1.173	1376	1206	1210	1702	1484	2112	2114	1946	2398	1986	2202	2154	3912	3344	2452	2638	2700	2332	1028	1088	1232	1432	680	586	1640	1384	1578	1596	1204	2106	1688	1510	1676	1970	1930	1766	65362	1264	97.0155	2010.89	275.129	2896.33	608.797	1007.67	323.24	1584.67	303.38	1756.67	171.877
2.7.8.12	822	928	630	968	742	944	962	1058	946	974	920	1130	1306	962	842	1178	1036	1110	806	738	1014	1082	642	526	2340	2324	2472	2004	2170	2804	5036	4344	4634	5284	5764	3902	65344	793.333	151.054	960.444	105.085	1072.33	163.543	801.333	214.116	2352.33	273.444	4827.33	671.813
1.21.1.1	1752	1396	1418	1480	1260	1628	1564	1654	1614	1684	1724	1448	2450	1786	1700	1790	1888	1554	1292	1184	1414	2004	1344	1074	2512	2466	2374	2926	2552	3550	1778	1694	1610	1798	2144	1824	65330	1522	199.489	1561.78	144.732	1861.33	309.349	1385.33	326.022	2730	444.175	1808	182.402
1.1.1.88	2072	1784	1942	1494	1324	1580	1556	1836	1570	1540	1706	1454	2414	1972	1896	2576	2944	1962	1566	1160	1782	2014	1472	1712	2174	2200	2018	2428	2186	3040	1306	1250	1336	1272	1410	1360	65308	1932.67	144.227	1562.22	145.624	2294	421.601	1617.67	292.004	2341	366.686	1322.33	58.8614
1.7.2.5	1656	1290	1310	1546	1390	1646	1622	2202	2016	1986	2012	1770	3944	2914	2648	4110	4462	3004	1098	830	1106	806	960	808	588	558	652	644	578	858	2408	2348	2358	2518	2276	2272	65194	1418.67	205.78	1798.89	268.492	3513.67	749.517	934.667	141.583	646.333	110.196	2363.33	91.8143
1.14.16.5	2856	1798	2162	1582	1330	1582	1634	2078	1404	1474	1476	1740	2708	1780	1634	2248	2568	1682	1274	1018	1320	2258	1350	1236	1624	1562	1576	1248	2010	1874	2332	1992	2072	2298	2390	2002	65172	2272	537.509	1588.89	221.174	2103.33	470.065	1409.33	432.027	1649	266.56	2181	178.781
5.3.1.4	1098	1170	936	1824	1894	2552	2262	2516	2858	2408	2450	2668	2700	1836	1440	1582	1586	1618	1022	962	1246	1078	590	512	2598	2498	2584	2990	2456	3372	1358	1248	1272	1254	1442	1286	65166	1068	119.85	2381.33	339.932	1793.67	461.974	901.667	288.706	2749.67	359.189	1310	75.7997
2.4.2.21	894	1066	832	1656	1516	1738	1878	1988	1810	1624	1770	1704	1854	1342	1404	1284	1146	1318	1620	1394	1744	1842	1212	878	2094	1952	2158	1940	2194	2696	2666	2510	2340	2812	3610	2486	64972	930.667	121.233	1742.67	140.656	1391.33	242.38	1448.33	362.201	2172.33	276.971	2737.33	457.151
1.2.1.80	812	858	728	750	640	818	882	830	1046	724	782	758	2654	2052	1756	2064	1820	1362	1968	1640	2202	2054	1108	840	2304	2148	2174	1866	2200	2560	3560	3264	3142	3486	3842	3196	64890	799.333	65.9191	803.333	114.197	1951.33	428.786	1635.33	550.948	2208.67	225.788	3415	265.965
3.8.1.3	1408	980	1056	2700	2166	2560	2558	2960	1996	2628	2606	2456	2474	1804	1238	1328	1146	1214	1440	1306	1508	2002	1464	1096	1906	1724	1808	1660	1946	2168	1636	1394	1548	1512	1564	1478	64438	1148	228.351	2514.44	285.441	1534	517.59	1469.33	300.724	1868.67	181.728	1522	82.2873
1.7.2.3	1118	1182	1006	1828	1606	2434	3038	2664	4190	3024	4060	3236	2124	1388	972	2086	1760	1930	506	374	472	402	314	260	2284	2752	3098	2118	1446	2478	1390	1374	1212	1394	1448	1276	64244	1102	89.0842	2897.78	884.127	1710	449.889	388	92.986	2362.67	567.79	1349	87.4414
4.1.1.6	818	572	642	3916	3298	3490	3662	4080	2814	3816	3638	3084	1448	1154	858	550	330	970	1328	952	1254	1490	1166	968	1808	1944	1932	1478	1680	2294	1248	972	954	1224	1082	1082	63996	677.333	126.749	3533.11	407.629	885	404.36	1193	209.566	1856	276.235	1093.67	122.79
5.3.3.3	1958	1330	1488	2018	1678	2292	2418	2148	2460	2298	2516	2218	1412	1354	912	1058	1050	1288	1580	1458	1756	1626	1336	1234	2146	2052	2090	2950	1988	3248	1438	1470	1330	1354	1562	1450	63964	1592	326.662	2227.33	258.592	1179	199.683	1498.33	193.5	2412.33	542.615	1434	83.8666
4.2.1.120	1958	1330	1488	2018	1678	2292	2418	2148	2460	2298	2516	2218	1412	1354	912	1058	1050	1288	1580	1458	1756	1626	1336	1234	2146	2052	2090	2950	1988	3248	1438	1470	1330	1354	1562	1450	63964	1592	326.662	2227.33	258.592	1179	199.683	1498.33	193.5	2412.33	542.615	1434	83.8666
3.5.1.115	1056	904	906	1642	1500	1712	1654	1838	1828	1764	1676	1632	2496	1836	1476	1850	1686	1672	1184	1162	1430	1774	878	760	2482	2276	2588	2080	2420	2640	2188	2114	2050	2260	2378	2130	63922	955.333	87.1856	1694	106.08	1836	350.654	1198	369.144	2414.33	208.14	2186.67	117.607
1.3.1.85	1516	1282	1282	2284	2038	2256	2226	2834	2134	2506	2480	2536	1982	1452	1230	1334	1156	1504	1384	1242	1476	1600	1694	1204	1390	1430	1370	1192	1604	1756	2126	1854	1856	2146	2392	1986	63734	1360	135.1	2366	245.039	1443	294.599	1433.33	194.515	1457	196.988	2060	205.672
3.1.1.4	1526	1226	1258	764	848	1254	1212	1220	1464	834	1000	1072	2058	1524	1308	1662	1924	1228	1572	1262	1624	2306	1318	1106	2916	2744	2968	2956	3138	3558	2342	1988	1974	2010	2272	2080	63516	1336.67	164.746	1074.22	233.215	1617.33	330.516	1531.33	426.453	3046.67	280.319	2111	157.697
1.3.8.5	972	986	766	1648	1550	1864	1612	1848	1570	2060	1952	1848	1430	1164	896	1226	830	1276	1610	1384	1606	1536	1028	770	2236	2018	2212	2280	2196	2964	2792	2536	2540	2846	3078	2384	63514	908	123.175	1772.44	182.49	1137	230.716	1322.33	347.672	2317.67	329.121	2696	254.92
6.3.1.19	1228	1050	838	1658	1388	1606	1682	1876	1624	1586	1574	1828	1732	1306	1136	1178	562	1244	1084	1116	1514	2104	1302	1072	1682	1828	1972	1352	1958	2018	3256	2986	2808	3432	3662	2938	63180	1038.67	195.247	1646.89	143.566	1193	376.172	1365.33	399.775	1801.67	251.979	3180.33	327.471
4.1.2.25	1966	1546	1484	1426	1212	1496	1410	1628	1300	1346	1358	1448	2152	1486	1328	2068	2182	1466	1148	1060	1358	1856	1196	950	2232	2058	2268	2122	2432	2764	2308	2052	1868	2336	2646	1980	62936	1665.33	262.224	1402.67	119.499	1780.33	393.006	1261.33	321.729	2312.67	255.99	2198.33	286.212
3.2.1.26	670	822	584	1120	1006	1430	1308	1468	1550	1366	1556	1562	2420	1776	1490	1356	1606	1134	1042	892	1330	1342	760	742	2660	2574	2686	2756	2376	3168	2740	2242	2300	2916	3328	2402	62480	692	120.516	1374	198.676	1630.33	444.226	1018	268.891	2703.33	262.58	2654.67	421.634
3.5.1.10	1210	1142	1068	1946	1680	2180	1916	2372	1928	1884	2078	2308	2546	1644	1536	1684	1610	1652	1136	1030	1116	1882	1156	1304	2134	2052	2196	1700	2154	2162	1648	1424	1546	1524	2292	1528	62368	1140	71.0211	2032.44	221.718	1778.67	379.283	1270.67	312.399	2066.33	185.815	1660.33	317.547
5.3.1.28	1574	1218	1424	1624	1618	1890	1904	2144	1930	2082	2270	1908	2258	1720	1426	1532	1696	1504	1228	978	1164	1116	1046	776	2414	2248	2354	2524	1948	2898	1662	1494	1690	1640	1594	1704	62200	1405.33	178.733	1930	217.44	1689.33	300.936	1051.33	160.811	2397.67	314.028	1630.67	77.4459
2.4.1.109	864	826	680	1372	1276	1604	1434	1660	1436	1960	1752	2004	1688	1276	984	1054	864	1316	900	854	1302	1578	660	546	1850	1904	2042	1828	1960	2348	3480	2984	3114	3770	4018	2962	62150	790	97.1391	1610.89	257.362	1197	296.037	973.333	393.46	1988.67	192.352	3388	440.694
6.3.3.3	1198	1040	984	1816	1550	1912	1712	1956	1680	1956	1996	1864	2084	1554	1376	1498	1420	1182	1438	1138	1330	1690	1280	1202	2094	2064	2166	1966	2168	2728	1974	1876	1834	2110	2234	1948	62018	1074	110.977	1826.89	150.881	1519	304.864	1346.33	197.692	2197.67	270.34	1996	150.381
1.5.1.33	1888	1436	1414	1822	1572	1766	1874	2028	1518	1942	1830	1706	2500	1890	1364	1958	1946	1602	1242	1064	1166	1506	1408	1004	2102	1778	1904	1838	1966	2452	1842	1704	1680	1822	1848	1624	62006	1579.33	267.539	1784.22	165.177	1876.67	384.295	1231.67	195.303	2006.67	245.088	1753.33	95.9972
6.3.5.10	770	856	746	2510	2130	2778	2464	2784	2540	2298	2430	2276	1792	1452	1162	1446	1328	1688	1748	1388	1616	1432	1578	1250	1850	1936	2066	1668	1826	2522	1260	1108	1222	1334	1292	1242	61788	790.667	57.8389	2467.78	219.195	1478	230.977	1502	179.27	1978	296.996	1243	76.9909
4.2.99.20	1436	1100	994	1262	1084	1522	1594	1644	1556	1548	1424	1648	2090	1750	1480	1610	1622	1176	1022	984	1340	1528	870	628	2746	2770	2636	2582	2524	3226	2074	1966	1900	2152	2532	1764	61784	1176.67	230.758	1475.78	189.603	1621.33	301.539	1062	324.76	2747.33	252.684	2064.67	265.844
2.6.1.2	2054	1748	1706	1832	1478	1738	1972	2128	1768	1974	2148	1956	1968	1596	1330	1970	2130	1848	962	866	914	1036	1118	1052	1648	1478	1570	2326	2038	2596	1620	1688	1836	1684	2110	1754	61640	1836	189.958	1888.22	209.884	1807	293.445	991.333	94.095	1942.67	452.659	1782	176.617
2.5.1.129	1530	1284	1424	1774	1538	1870	2066	2200	1900	1862	2230	1784	1982	1544	1300	1542	1610	1322	1692	1184	1474	1138	1114	928	2282	2258	2244	2354	1916	2884	1526	1656	1520	1486	1440	1540	61398	1412.67	123.391	1913.78	220.076	1550	246.904	1255	277.298	2323	314.159	1528	72.2551
2.8.2.1	1376	1018	968	2092	1924	2086	1934	2404	1930	1966	2026	1906	2174	1480	1136	1264	1106	1052	1252	1096	1358	1662	1618	1438	2852	2622	2646	1924	2506	2860	1396	1164	1224	1244	1316	1234	61254	1120.67	222.534	2029.78	156.842	1368.67	423.159	1404	216.148	2568.33	344.528	1263	81.2675
1.12.98.1	1422	1112	1172	1484	1238	1470	1562	1680	1482	1484	1558	1622	2206	1530	1494	1760	1780	1558	1664	1240	1742	1988	1326	1262	2014	1984	1998	2132	2256	2632	1882	1722	1834	2044	2064	1824	61222	1235.33	164.418	1508.89	124.58	1721.33	266.385	1537	306.565	2169.33	249.318	1895	133.882
2.3.1.312	1346	1170	1090	1560	1132	1506	1482	1826	1506	1592	1710	1550	1930	1354	1134	1200	1238	980	2044	1556	1762	2166	1886	1496	2314	2106	2182	2468	2612	3390	1800	1590	1600	1502	1766	1638	61184	1202	130.966	1540.44	189.089	1306	329.666	1818.33	265.431	2512	468.137	1649.33	113.227
4.1.1.114	1080	1122	930	1300	1046	1296	1240	1292	1394	1210	1392	1228	1820	1568	1448	1484	1742	1110	1496	1284	1618	2092	1128	1004	2586	2200	2240	2412	2710	3248	2360	2090	2146	2204	2456	2202	61178	1044	100.936	1266.44	105.265	1528.67	251.284	1437	392.848	2566	387.352	2243	137.897
3.4.19.5	1636	1132	1196	1010	860	1200	1170	1218	1388	944	1062	1008	2518	1820	1346	2374	3192	1616	1392	1164	1442	1804	1266	1036	2560	2576	2570	2584	2434	3188	1954	1652	1730	1708	1720	1596	61066	1321.33	274.382	1095.56	162.609	2144.33	679.948	1350.67	267.054	2652	268.48	1726.67	122.257
2.1.1.157	1760	1212	1308	2468	1840	2082	2292	2886	1996	2380	2404	2142	2090	1536	1220	1370	1022	1240	1154	880	1228	1258	1344	1068	1860	1876	1932	1370	1698	1970	1682	1608	1664	1626	1820	1672	60958	1426.67	292.639	2276.67	308.323	1413	372.925	1155.33	164.227	1784.33	223.397	1678.67	74.851
1.14.13.84	1082	730	874	2796	2432	2600	2560	2862	2254	2606	2662	2696	1660	1410	1168	1030	742	1368	918	848	1044	1238	886	694	2108	2148	2064	1294	2080	1776	1722	1544	1712	1698	1910	1662	60878	895.333	176.967	2607.56	183.433	1229.67	321.972	938	185.459	1911.67	330.412	1708	118.43
4.4.1.1	2464	1502	1840	1770	1570	1696	1652	2028	1574	1924	1934	1720	2066	1662	1580	1578	1692	1410	1500	1322	1650	1774	2016	1756	1682	1558	1562	2080	2086	2510	1272	1426	1180	1190	1354	1176	60756	1935.33	488.034	1763.11	164.721	1664.67	219.708	1669.67	240.138	1913	378.633	1266.33	104.548
3.6.1.41	1624	1522	1242	1214	1200	1382	1408	1610	1362	1400	1362	1616	2116	1552	1528	1650	1704	1286	1270	1104	1302	1776	1182	1178	2666	2614	2786	1866	2154	2526	1852	1778	1870	1768	2284	1788	60542	1462.67	197.791	1394.89	145.083	1639.33	274.362	1302	242.767	2435.33	352.024	1890	197.44
1.13.11.58	1492	1096	1030	1648	1260	1564	1568	1818	1486	1504	1574	1416	1924	1302	1194	1378	1536	1210	1290	1190	1466	1844	1388	1418	2474	2408	2516	2308	2200	2880	1930	1696	1792	1882	1814	1690	60186	1206	249.872	1537.56	153.866	1424	275.042	1432.67	224.391	2464.33	233.678	1800.67	96.7443
5.3.1.12	1144	1202	848	1522	1370	1888	1614	1938	2050	1630	1642	1980	2088	1370	1126	1448	1512	1392	970	836	1144	1234	806	646	2748	2946	2928	2972	2826	3456	1566	1380	1426	1464	1586	1476	60174	1064.67	189.867	1737.11	233.65	1489.33	321.356	939.333	220.978	2979.33	248.209	1483	79.707
4.4.1.25	1580	1188	1210	1694	1394	1794	1788	1926	1910	1548	1754	1460	2430	2002	1406	1492	1606	1364	1478	1132	1736	1672	1254	1324	2210	1980	2124	2090	2068	2802	1404	1422	1452	1354	1568	1386	60002	1326	220.245	1696.44	190.044	1716.67	418.06	1432.67	238.947	2212.33	298.426	1431	74.7984
3.1.3.23	1470	1240	1050	1406	1298	1676	1750	1822	1864	1798	2000	1838	2290	1760	1420	1496	1436	1418	1124	912	1046	1326	782	670	2052	1982	2172	2250	1780	2508	2158	1880	1952	2038	2432	1896	59992	1253.33	210.317	1716.89	226.102	1636.67	345.505	976.667	238.608	2124	248.725	2059.33	209.49
3.2.1.172	666	914	578	1334	1378	2082	2012	2166	2232	1678	1892	2306	1372	1106	876	1324	2290	1190	732	630	792	838	632	404	3420	3476	3366	5242	4068	5282	586	654	630	624	598	598	59968	719.333	174.234	1897.78	359.449	1359.67	488.674	671.333	155.397	4142.33	903.559	615	25.4794
2.6.1.21	1774	1304	1416	1544	1358	1460	1602	1798	1346	1658	1760	1736	2186	1678	1300	1574	1650	1284	1120	814	1006	1444	1372	1118	2456	2292	2516	2124	2154	2720	1864	1618	1630	1942	1710	1592	59920	1498	245.495	1584.67	169.694	1612	329.135	1145.67	232.879	2377	229.858	1726	144.77
7.2.2.20	1048	922	980	1430	1204	1452	1522	1722	1464	1550	1688	1598	1564	1248	1128	1526	1768	1410	1292	924	1114	1566	1022	938	2200	2266	2090	2694	2184	3284	2048	1962	1934	2192	2808	1950	59692	983.333	63.0661	1514.44	154.699	1440.67	230.418	1142.67	247.628	2453	458.639	2149	336.787
1.1.1.272	1428	966	1022	1606	1446	1762	1904	1964	1688	1718	1912	1748	2240	1544	1302	1718	1456	1342	1202	994	1442	1584	1122	1058	2404	2082	2182	2426	2384	3056	1516	1420	1426	1574	1486	1556	59680	1138.67	252.13	1749.78	163.525	1600.33	347.207	1233.67	231.477	2422.33	339.688	1496.33	64.59
1.4.1.18	1664	1220	1480	1490	1366	1770	1752	1866	2136	1784	2012	1632	1950	1946	1216	1584	1764	1390	1298	1242	1296	814	712	524	2316	2016	1912	3330	2196	3408	1398	1400	1274	1422	1590	1482	59652	1454.67	223.081	1756.44	240.12	1641.67	300.169	981	339.686	2529.67	665.486	1427.67	104.494
2.5.1.46	1892	1334	1786	1898	1546	1844	1824	2356	1492	2244	2504	1900	2236	1794	1572	2176	2564	1920	1160	908	1158	1024	1384	1368	1678	1374	1302	2524	1886	2578	1166	1038	1118	994	998	1074	59614	1670.67	296.34	1956.44	346.971	2043.67	353.652	1167	187.163	1890.33	553.581	1064.67	68.3364
2.7.1.21	1992	1432	1644	1314	1092	1406	1468	1404	1442	1422	1520	1434	2002	1534	1470	1860	1900	1612	1160	1262	1340	2050	1152	1094	2034	1940	2068	2420	2152	2530	1734	1530	1558	1784	1998	1736	59490	1689.33	282.739	1389.11	124.335	1729.67	218.963	1343	357.321	2190.67	233.093	1723.33	169.77
2.4.2.2	1912	1218	1518	1828	1526	1890	1932	2206	2122	1974	2068	1806	2260	1884	1466	1964	2088	1622	1064	1076	1212	1208	880	738	1612	1456	1404	2212	1480	2572	1440	1372	1278	1442	1944	1646	59320	1549.33	348.059	1928	201.427	1880.67	294.175	1029.67	187.533	1789.33	485.374	1520.33	240.251
4.2.1.171	1910	1246	1306	1860	1496	1620	1742	1846	1574	1764	1592	1618	2408	1664	1430	1304	1248	1072	1374	1068	1572	1652	1944	1862	2018	1892	2004	1736	1970	2450	1572	1302	1408	1638	1668	1478	59308	1487.33	367.267	1679.11	128.028	1521	477.225	1578.67	323.06	2011.67	238.446	1511	141.335
3.1.3.102	1480	1278	1028	1242	1068	1310	1242	1330	1340	1400	1572	1396	2284	1526	1162	1712	1706	1100	1092	912	1234	1558	800	848	2468	2184	2276	2146	1962	2660	2484	2130	2266	2574	2346	2118	59234	1262	226.424	1322.22	137.799	1581.67	432.883	1074	287.255	2282.67	248.199	2319.67	185.422
3.5.1.136	1448	1050	1104	1468	1278	1598	1924	1828	1880	1908	2070	1914	2018	1656	1196	1294	1026	1374	1330	1310	1488	1626	786	554	2190	2086	2220	1622	1878	2422	1866	1842	1742	1924	2052	1926	58898	1200.67	215.892	1763.11	257.727	1427.33	356.758	1182.33	419.585	2069.67	282.357	1892	103.398
2.7.8.40	2330	1318	1740	1654	1452	2008	2014	2106	1978	1892	2114	2002	2448	1860	1448	1662	1546	1404	996	764	928	1242	1060	746	1766	1662	1742	1846	1388	2184	1710	1476	1410	1680	1650	1448	58674	1796	508.319	1913.33	220.529	1728	389.019	956	187.595	1764.67	258.994	1562.33	131.96
6.1.3.1	870	1062	810	1220	890	1180	1188	1296	1434	1044	1262	1118	2040	1504	1384	1294	1452	942	1210	1056	1408	1862	942	752	2528	2262	2348	2660	2874	3672	2232	2004	2070	2162	2432	2094	58558	914	131.636	1181.33	155.235	1436	356.819	1205	392.291	2724	513.524	2165.67	152.165
1.3.1.1	2394	2140	1988	1712	1358	1628	1696	1984	1628	1890	2124	2072	2388	1788	1524	1752	1816	1526	1394	1034	1198	1540	1648	1750	1254	1224	1186	2610	1680	2580	1048	936	982	962	1038	1038	58510	2174	205.124	1788	248.171	1799	316.131	1427.33	273.466	1755.67	674.388	1000.67	47.0177
2.3.2.10	1500	1036	1074	1440	1186	1554	1442	1578	1850	1428	1754	1524	2492	2080	1408	1920	2040	1562	848	974	1036	980	706	590	2624	2274	2258	2288	1824	3136	1606	1532	1496	1758	1860	1784	58442	1203.33	257.622	1528.44	193.667	1917	389.214	855.667	176.079	2400.67	440.96	1672.67	148.468
7.1.1.12	2980	2140	2240	584	576	790	900	1020	720	820	862	906	3070	1906	1690	1684	1524	1040	1626	1264	1524	1728	1344	1154	1518	1624	1604	1316	1538	1684	2642	2496	2520	2676	2284	2422	58416	2453.33	458.839	797.556	148.811	1819	678.425	1440	222.074	1547.33	128.241	2506.67	144.242
4.1.2.14	1760	1472	1438	1346	1320	1666	1582	1744	1756	1452	1498	1524	2406	1778	1490	1794	1798	1458	1132	1154	1392	1826	1036	884	1940	1898	2014	2196	2230	2626	1510	1326	1302	1422	1724	1416	58310	1556.67	176.911	1543.11	158.755	1787.33	340.547	1237.33	332.827	2150.67	268.771	1450	153.555
4.1.3.42	1756	1472	1436	1346	1320	1666	1582	1744	1756	1452	1498	1524	2406	1778	1490	1794	1798	1458	1132	1154	1392	1826	1036	884	1940	1898	2014	2196	2230	2626	1510	1326	1302	1422	1706	1416	58286	1554.67	175.286	1543.11	158.755	1787.33	340.547	1237.33	332.827	2150.67	268.771	1447	147.175
5.3.1.22	1586	1416	1458	1726	1480	1752	1912	2250	1794	1946	2164	1882	2294	1790	1386	1628	1670	1456	1186	1088	1322	1544	994	964	1724	1560	1720	2098	2252	2430	1258	1074	1336	1196	1642	1280	58258	1486.67	88.5513	1878.44	231.952	1704	324.054	1183	220.163	1964	345.95	1297.67	190.936
2.8.3.5	1936	1510	1588	1744	1574	2048	1842	2306	1894	2302	2078	2480	2428	1634	1586	1858	1644	1980	1026	654	638	1276	920	862	908	876	1034	1040	1140	1460	1620	1494	1618	2088	3208	1728	58022	1678	226.813	2029.78	295.563	1855	319.276	896	240.067	1076.33	211.109	1959.33	644.582
3.6.1.31	1672	1268	1352	1388	1164	1382	1318	1580	1354	1436	1488	1448	2170	1536	1414	1910	1946	1352	1152	982	1262	1650	954	738	2008	1652	1672	2124	2036	2346	2010	1788	1872	2156	2462	1836	57878	1430.67	213.179	1395.33	116.486	1721.33	332.44	1123	314.502	1973	268.613	2020.67	254.378
1.1.2.11	2988	1522	2286	1906	1506	1876	1932	2484	1538	2212	2180	1912	2180	1592	1264	1574	1348	1472	1156	1060	1134	1746	1454	1178	1248	1334	1260	1110	2126	1596	1284	1332	1270	1240	1300	1204	57804	2265.33	733.218	1949.56	312.801	1571.67	324.07	1288	261.742	1445.67	369.903	1271.67	45.1206
1.1.1.29	1462	1306	1124	1212	978	1126	1146	1462	1128	1222	1250	1284	1856	1254	1102	1418	1482	1026	1676	1318	1492	1742	1482	1192	2922	2536	2506	2186	2452	3028	1814	1622	1608	1788	1774	1652	57628	1297.33	169.167	1200.89	133.079	1356.33	301.177	1483.67	207.998	2605	313.99	1709.67	92.2034
2.3.2.3	1032	766	970	1746	1674	2036	2188	2420	2310	2554	2734	2880	1378	1038	760	1234	1020	1336	552	574	442	832	612	510	2164	2036	2138	2738	2096	2990	1592	1346	1394	2032	2014	1448	57586	922.667	139.174	2282.44	415.637	1127.67	233.318	587	133.415	2360.33	400.538	1637.67	309.718
1.3.1.31	1330	950	1172	1324	1162	1818	2058	1732	2574	1924	2260	1998	1036	944	818	788	800	976	1270	1038	1268	1028	656	588	2978	2930	2918	3262	2424	3854	1362	1312	1180	1264	1312	1258	57566	1150.67	190.896	1872.22	436.383	893.667	105.105	974.667	293.66	3061	473.185	1281.33	62.4521
3.7.1.22	1612	1184	1330	2206	1842	2274	2192	2778	2556	2618	2328	2664	2784	1670	1406	1696	1424	1480	716	716	692	1380	816	956	1274	1304	1406	1042	1166	1372	1392	1294	1370	1590	1598	1432	57560	1375.33	217.571	2384.22	294.857	1743.33	524.541	879.333	264.199	1260.67	135.904	1446	123.152
5.4.99.24	1928	1528	1432	1372	1326	1468	1556	1880	1240	1524	1690	1688	1998	1292	1164	1770	1868	1226	1206	888	1174	1500	1366	1144	1936	1966	2030	1650	1802	2042	1838	1858	1714	1662	1970	1718	57414	1629.33	263.069	1527.11	202.554	1553	366.254	1213	208.679	1904.33	151.464	1793.33	115.417
1.8.5.7	1148	944	926	2024	1546	1910	1838	2188	1716	1706	1752	1848	1642	1334	1202	1398	1402	1312	1658	1470	1588	2584	2002	1730	1888	1568	1808	1500	2034	2158	1242	1252	1204	1168	1350	1244	57284	1006	123.305	1836.44	189.515	1381.67	146.874	1838.67	406.3	1826	257.098	1243.33	61.1185
1.5.1.38	1248	968	1082	1346	1180	1636	1590	1702	1852	1398	1824	1590	1658	1444	1232	1192	1276	1274	1382	1260	1392	1218	758	680	2542	2288	2332	2790	1936	3322	1502	1518	1462	1540	2242	1622	57278	1099.33	140.802	1568.67	223.177	1346	175.353	1115	315.064	2535	478.636	1647.67	295.969
3.1.3.2	1608	1214	1220	2152	1920	2340	2592	2722	2682	2260	2580	2296	2074	1632	1202	1390	1260	1720	990	932	1130	1322	800	714	1708	1630	1738	1190	1446	1830	1072	1092	1100	1044	1360	1236	57198	1347.33	225.764	2393.78	268.804	1546.33	328.914	981.333	221.365	1590.33	234.846	1150.67	122.211
7.3.2.2	1292	972	1094	1970	1700	2020	2124	2242	1990	1810	2154	1946	2378	1650	1432	1612	1322	1432	1160	1092	1136	1652	1312	1274	1876	1590	1778	1718	1668	2272	1294	1172	1156	1346	1368	1142	57146	1119.33	161.497	1995.11	168.766	1637.67	382.922	1271	204.665	1817	243.129	1246.33	101.567
2.6.1.76	1466	944	1044	2440	2158	2412	2318	2910	2098	2132	2172	2158	2054	1628	1428	1676	1436	1744	1202	888	1112	1400	2010	1624	1328	1348	1466	1244	1478	1556	928	754	884	846	1690	1082	57058	1151.33	277.058	2310.89	257.206	1661	231.329	1372.67	400.521	1403.33	115.701	1030.67	340.603
4.2.1.56	1150	990	850	1962	1810	2142	2138	2322	1784	2336	2318	2256	2058	1472	1110	1376	1168	1206	1002	908	1054	1646	1194	956	1214	1204	1268	1024	1346	1564	2076	1878	1888	2070	2194	1894	56828	996.667	150.111	2118.67	217.92	1398.33	350.505	1126.67	272.766	1270	179.011	2000	131.891
2.6.1.18	2122	1774	1732	1686	1572	1726	1578	2168	1466	1768	1816	1652	2660	1752	1614	1896	1824	1372	976	718	1024	1122	1348	1234	1094	1086	1206	834	1118	1374	1966	1856	1822	1926	1974	1724	56580	1876	214.075	1714.67	201.36	1853	436.491	1070.33	219.881	1118.67	176.371	1878	96.5401
2.6.1.98	1454	1048	1304	1504	1206	1456	1784	2114	1648	2004	2050	1824	2212	1502	1196	1684	2280	1386	1048	864	882	1156	858	602	1984	1658	1858	2466	1878	2722	1534	1342	1342	1654	1578	1488	56570	1268.67	205.293	1732.22	304.978	1710	444.976	901.667	189.532	2094.33	409.223	1489.67	126.797
3.2.1.218	2004	1264	1732	1122	826	1122	1130	1402	1224	1328	1310	1294	2094	1364	1148	1556	2062	1214	844	850	1070	1328	1014	746	2370	2404	2312	3302	3218	3556	1512	1218	1406	1474	1426	1316	56562	1666.67	374.301	1195.33	171.555	1573	415.701	975.333	209.943	2860.33	557.904	1392	108.192
2.1.1.148	1294	1378	1174	1188	1074	1286	1304	1366	1248	1376	1602	1264	1630	1496	1072	1438	1926	1152	1218	1030	1344	1770	1208	1052	1530	1388	1374	2354	1948	2444	2350	2052	2138	2246	2570	2156	56440	1282	102.528	1300.89	145.414	1452.33	313.972	1270.33	270.979	1839.67	481.297	2252	185.998
4.4.1.37	1292	1050	1038	1328	1096	1438	1638	1780	1596	1674	1860	1538	1528	1252	932	1288	1546	1316	1288	1092	1172	1156	916	864	2270	2014	2052	2954	2376	3580	1556	1520	1416	1748	1684	1570	56418	1126.67	143.309	1549.78	235.139	1310.33	223.601	1081.33	161.981	2541	611.164	1582.33	118.473
3.1.1.85	786	818	626	1156	1046	1418	1370	1516	1260	1226	1240	1264	1562	1160	1022	1092	1294	1014	1438	1196	1354	1804	1140	844	2482	2456	2600	2136	2542	2780	2024	1742	1790	2140	3078	2000	56416	743.333	102.866	1277.33	140.57	1190.67	209.237	1296	322.562	2499.33	212.093	2129	488.483
3.1.3.27	1466	1088	1160	1194	1272	1316	1388	1534	1408	1382	1582	1458	1972	1518	1322	1602	1582	1196	1308	1018	1180	1306	1170	896	2286	2026	2462	2142	2030	2868	1566	1410	1610	1628	2366	1682	56394	1238	200.709	1392.67	122.662	1532	267.654	1146.33	162.763	2302.33	323.101	1710.33	334.239
1.1.1.36	1542	1088	1102	1880	1728	1736	1938	2260	1434	1948	1846	1900	2162	1410	1146	1298	1426	1108	1220	908	1196	1050	1378	1234	1788	1652	1806	1358	1558	1798	1748	1672	1594	1672	2000	1642	56226	1244	258.17	1852.22	220.725	1425	384.149	1164.33	163.332	1660	177.998	1721.33	145.424
4.2.2.23	612	572	518	1692	1442	2098	1870	2100	2110	1888	1996	2436	1592	1214	954	1070	1226	1082	646	712	896	706	834	932	2598	2342	2542	4350	2934	4856	774	842	886	888	950	932	56092	567.333	47.1734	1959.11	283.382	1189.67	221.466	787.667	115.913	3270.33	1061.83	878.667	63.8331
2.3.1.265	1294	1036	968	1292	1134	1456	1432	1418	1452	1542	1594	1612	1618	1354	1016	946	808	890	988	1016	1302	1676	870	734	1800	1780	1976	1692	2042	2328	2544	2232	2236	2748	2826	2140	55792	1099.33	171.981	1436.89	150.044	1105.33	313.944	1097.67	340.295	1936.33	231.891	2454.33	292.685
1.14.15.14	472	548	380	2280	1954	2168	1896	2378	1644	1762	1926	2000	1862	1318	1204	1046	634	1026	1086	880	1270	1646	870	652	1706	1916	2104	1288	2214	2148	1926	1666	1782	2000	2290	1788	55730	466.667	84.1269	2000.89	237.51	1181.67	406.083	1067.33	352.934	1896	350.444	1908.67	220.703
1.1.7.1	2668	1778	2082	2228	1934	2192	2466	2690	1816	2960	2854	2212	1440	1372	1234	1056	698	1146	1300	930	1054	516	1340	1244	1444	1178	1166	2226	1594	2222	784	754	856	760	778	752	55724	2176	452.385	2372.44	398.08	1157.67	265.798	1064	310.687	1638.33	481.821	780.667	39.1237
4.3.2.5	1662	1214	1060	3440	2888	2952	3306	4198	2178	3720	3932	3118	1978	1666	1170	1150	946	1178	746	616	772	850	1242	828	736	592	680	782	760	754	758	716	644	780	856	734	55602	1312	312.736	3303.56	610.799	1348	389.722	842.333	212.345	717.333	70.4235	748	70.4613
1.16.99.1	1420	952	1138	1162	1136	1328	1426	1254	1812	1244	1510	1356	1720	1530	1058	1446	1496	1304	1066	972	1084	826	836	624	3226	2848	2760	3426	2474	4414	1116	1086	1046	1140	1178	1184	55598	1170	235.635	1358.67	208.043	1425.67	224.882	901.333	174.547	3191.33	688.43	1125	53.5873
4.1.1.17	1774	1206	1188	1806	1444	1624	1706	1934	1482	1824	1802	1764	2116	1488	1170	1824	1870	1366	1034	802	1052	1360	1328	1078	1422	1278	1496	1166	1540	1782	1848	1706	1846	1854	1922	1674	55576	1389.33	333.253	1709.56	163.523	1639	355.642	1109	207.387	1447.33	215.138	1808.33	96.4524
1.4.1.9	2172	1526	1584	1916	1682	1908	1862	2266	1820	1856	1800	1606	1616	1262	1166	1438	1364	1266	1560	1172	1558	2268	1828	1738	1336	1306	1332	1606	1644	2044	1058	894	936	954	1008	1022	55374	1760.67	357.404	1857.33	184.266	1352	159.579	1687.33	362.777	1544.67	285.9	978.667	61.0399
3.1.4.55	1600	1134	1246	1872	1502	1828	1820	2324	1622	2022	1966	1892	2330	1536	1296	1902	2166	1600	992	858	986	1128	960	698	1628	1488	1476	2078	1784	2222	1146	1096	1212	1256	1366	1314	55346	1326.67	243.247	1872	234.542	1805	397.196	937	145.463	1779.33	311.437	1231.67	101.536
2.3.1.276	1464	1054	1216	1506	1314	1458	1680	1652	1718	1490	1784	1388	2498	1872	1616	2558	2914	1968	978	888	1032	844	714	612	1770	1570	1546	2562	1876	2926	1132	1040	1068	1162	1216	1234	55320	1244.67	206.498	1554.44	160.486	2237.67	494.108	844.667	158.718	2041.67	569.596	1142	77.8717
2.8.3.13	1564	1108	1212	2550	2360	2734	2742	3008	2126	2880	2826	2366	2172	1468	1172	1228	912	1306	664	568	778	686	684	800	1108	1036	1074	856	970	1196	1490	1394	1476	1744	1678	1380	55316	1294.67	238.976	2621.33	289.287	1376.33	430.301	696.667	83.892	1040	117.378	1527	150.438
2.3.1.311	1234	1030	1028	1436	1368	1732	1850	1728	2008	1506	1680	1562	2108	1660	1178	1880	2258	1580	1302	1258	1310	1240	970	968	1824	1886	1744	2178	1592	2816	1248	1178	1198	1246	1230	1170	55184	1097.33	118.361	1652.22	204.825	1777.33	390.597	1174.67	161.457	2006.67	441.191	1211.67	34.3259
1.17.99.10	4294	2858	3408	1218	1238	1910	2812	3024	2292	3684	3844	3008	992	754	658	530	198	1776	1570	1492	2062	690	962	604	824	828	948	444	496	738	716	690	732	898	1048	784	55024	3520	724.522	2558.89	964.008	818	537.602	1230	571.274	713	200.423	811.333	137.385
1.2.1.10	868	856	922	1934	1904	2186	1992	2240	2314	2014	2116	2426	1706	1202	1018	1348	1200	1716	782	654	850	958	744	652	1500	1198	1206	1378	1402	1878	1752	1568	1678	2028	3004	1818	55012	882	35.1568	2125.11	179.82	1365	287.741	773.333	118.218	1427	250.215	1974.67	527.235
1.1.2.6	872	630	606	2468	2260	2640	2358	3204	2000	2386	2470	2626	2168	1452	1306	1172	900	1322	780	734	768	1246	996	910	1742	1928	1872	1164	1742	1726	1166	992	1074	1078	1156	1060	54974	702.667	147.137	2490.22	330.325	1386.67	426.231	905.667	194.02	1695.67	273.114	1087.67	64.8126
2.1.1.258	1262	956	1018	1090	1056	1576	1626	1424	2116	1472	1796	1474	1480	1470	1094	1106	1052	1070	1466	1254	1398	922	684	498	2654	2334	2296	3170	2282	3720	1294	1202	1198	1496	1392	1438	54836	1078.67	161.769	1514.44	327.742	1212	204.603	1037	397.443	2742.67	587.263	1336.67	124.821
2.1.3.1	596	812	458	1604	1544	1842	1698	1954	1796	1592	1614	1684	1598	1180	1082	1378	1224	1364	1238	918	1372	1588	1124	918	1474	1688	1710	1054	1572	1484	2408	2122	2098	2532	2444	2026	54790	622	178.426	1703.11	135.407	1304.33	182.522	1193	263.098	1497	238.505	2271.67	213.996
7.2.4.1	1514	1596	1200	1044	970	1330	1336	1296	1540	1142	1368	1300	2014	1728	1280	1976	2570	1574	1026	816	918	944	842	806	2448	2274	2364	3036	2144	3644	1126	1094	1064	1162	1086	1180	54752	1436.67	209.02	1258.44	176.173	1857	442.004	892	86.0326	2651.67	575.678	1118.67	45.5134
7.6.2.15	1244	826	892	1150	1210	1548	1418	1464	1668	1568	1716	1474	2228	1616	1338	1500	1336	1232	1040	952	1210	1592	672	692	2076	1852	1994	1798	1802	2670	1764	1728	1666	2058	2038	1620	54652	987.333	224.716	1468.44	189.784	1541.67	362.764	1026.33	345.472	2032	331.807	1812.33	189.278
4.1.1.111	1372	1242	1204	2122	1754	1934	1966	2216	1734	2040	2142	1802	1896	1444	1082	1702	1676	1310	960	714	868	572	1008	982	1156	1124	1160	1342	930	1710	1972	1860	1784	1920	2148	1758	54606	1272.67	88.0984	1967.78	176.758	1518.33	296.83	850.667	173.545	1237	266.181	1907	142.838
2.1.1.166	1670	1104	1284	1380	1204	1496	1564	1804	1354	1578	1576	1482	1700	1318	1196	1452	1516	1368	1338	1032	1114	1318	1386	1284	1878	2008	2048	1902	1842	2354	1516	1548	1350	1414	1542	1472	54392	1352.67	289.18	1493.11	170.153	1425	174.226	1245.33	139.935	2005.33	188.13	1473.67	78.5409
3.2.1.180	878	830	762	1170	1158	1508	1430	1508	1754	1502	1670	1504	2510	1728	1458	1570	1780	1244	1000	968	1106	1332	632	494	2574	2568	2526	2042	1858	2500	1358	1380	1342	1486	1544	1644	54318	823.333	58.2866	1467.11	198.303	1715	434.818	922	309.011	2344.67	312.389	1459	120.258
6.3.1.13	522	618	302	1362	1170	1444	1442	1530	1480	1442	1420	1498	1680	1240	1020	1150	610	1224	948	1018	1518	1470	776	532	1598	1700	1796	1218	1694	1848	3070	2574	2546	3108	3248	2472	54288	480.667	162.004	1420.89	105.585	1154	347.241	1043.67	387.301	1642.33	225.358	2836.33	341.679
2.7.1.168	1332	790	1026	1410	1388	1798	1982	1928	2064	1824	2080	1914	2154	1846	1340	1514	1478	1408	972	838	1108	690	758	488	1870	1796	1752	2520	1718	2710	1112	1298	1134	1278	1222	1264	53804	1049.33	271.752	1820.89	257.171	1623.33	313.34	809	217.538	2061	436.284	1218	78.0051
2.4.2.3	1362	1026	1012	1078	866	1198	1244	1410	1398	1300	1320	1236	1870	1444	1124	1576	2028	1158	894	910	934	1232	600	620	2228	1930	2086	1994	1956	2652	2032	1966	1870	2048	2272	1880	53754	1133.33	198.155	1227.78	169.719	1533.33	367.769	865	233.481	2141	272.789	2011.33	147.646
1.1.1.401	1224	970	948	1864	1590	1906	1762	2196	1630	2046	2032	1928	2474	1718	1326	1724	1552	1402	830	764	1032	1090	924	790	1246	1206	1326	870	1318	1366	1672	1544	1480	1832	2130	1616	53328	1047.33	153.393	1883.78	198.163	1699.33	412.446	905	133.751	1222	181.936	1712.33	237.482
3.1.3.24	1424	982	1038	1432	1276	1656	1630	1626	1962	1434	1640	1610	1814	1340	1154	1058	1290	848	1070	1028	1144	1336	852	768	2422	2306	2424	1822	1924	2140	1514	1388	1422	1604	1400	1532	53310	1148	240.657	1585.11	192.424	1250.67	327.254	1033	204.211	2173	256.508	1476.67	86.4839
1.1.1.374	1488	1012	1210	1726	1412	1668	1732	1984	1640	1700	1830	1516	1994	1446	1054	1800	1748	1498	1114	834	1144	1032	828	882	1592	1518	1478	1368	1318	2004	1520	1464	1524	1756	1806	1476	53116	1236.67	239.118	1689.78	165.733	1590	331.293	972.333	142.287	1546.33	245.339	1591	149.889
1.1.1.337	1094	920	848	2078	1824	2074	2036	2210	1640	2190	2044	1742	1612	1322	1058	1202	1068	1080	1504	1338	1526	1896	922	790	1718	1540	1668	2122	1858	2526	976	852	814	1040	928	1024	53084	954	126.475	1982	199.755	1223.67	215.99	1329.33	411.624	1905.33	363.126	939	91.7715
4.1.1.68	1034	746	746	1742	1450	1714	1732	2036	1704	1854	1764	1904	1812	1324	1068	1076	708	1060	786	740	904	1124	914	694	1336	1366	1448	1226	1244	1476	2462	2124	2268	2590	2740	2096	53012	842	166.277	1766.67	161.177	1174.67	368.926	860.333	156.192	1349.33	102.51	2380	260.446
4.3.1.4	1548	1266	1224	1114	824	1286	1432	1246	1482	1410	1618	1284	1810	1572	1338	1710	2002	1316	862	936	1102	658	588	540	2148	1690	1834	3058	2202	3420	1416	1362	1416	1466	1384	1438	53002	1346	176.193	1299.56	231.384	1624.67	269.903	781	220.946	2392	692.841	1413.67	37.125
3.2.1.58	1388	1128	1078	622	560	630	754	852	822	678	816	662	3348	2092	1816	2596	3248	1434	996	808	956	2310	1046	1162	1490	1356	1470	1516	1446	1444	2294	2040	2034	2150	1864	1944	52850	1198	166.433	710.667	103.591	2422.33	777.471	1213	549.738	1453.67	55.0697	2054.33	152.06
5.1.3.15	724	846	484	996	794	1172	1040	1248	1030	980	1042	1240	1566	1094	998	1214	960	950	1014	1058	1154	1614	930	656	2332	2428	2462	1680	2228	2176	2340	2158	2212	2692	3096	2224	52832	684.667	184.177	1060.22	142.813	1130.33	235.445	1071	315.361	2217.67	285.636	2453.67	369.021
4.2.1.90	902	738	748	1752	1306	1804	1682	1912	1612	1822	1724	1672	1994	1562	1280	1514	1184	1386	1084	814	1224	1090	1070	952	2188	2028	1896	2142	1982	2718	1122	1166	1222	1282	1158	1084	52816	796	91.9348	1698.44	172.478	1486.67	285.749	1039	140.004	2159	293.69	1172.33	70.8171
1.1.1.381	1182	854	1020	1280	1188	1438	1378	1586	1364	1398	1294	1376	1730	1296	1128	1386	1804	1326	1108	928	968	1440	1094	976	2074	1704	1944	2804	2222	2940	1334	1270	1214	1426	2056	1284	52814	1018.67	164.004	1366.89	111.306	1445	264.741	1085.67	188.07	2281.33	490.028	1430.67	314.54
3.4.21.50	1008	730	880	828	706	958	834	812	1040	934	1082	798	2598	2258	2112	2154	3102	1604	632	604	644	710	564	534	2354	2046	2040	3654	2774	3804	1332	1316	1318	1256	1400	1374	52794	872.667	139.145	888	123.122	2304.67	504.919	614.667	62.3496	2778.67	784.896	1332.67	50.2262
4.2.1.70	1270	1014	1060	1302	1220	1600	1482	1686	1660	1632	1586	1382	2164	1622	1458	1624	1346	1348	924	734	1138	1214	832	802	1540	1446	1428	1312	1418	1766	1934	1772	1914	2098	2192	1724	52644	1114.67	136.475	1505.56	168.297	1593.67	305.647	940.667	193.741	1485	155.675	1939	181.138
3.5.3.18	1820	1228	1272	1150	1048	1372	1314	1394	1334	1238	1504	1196	2242	1816	1438	1624	1538	1414	1052	956	1060	1038	818	770	1914	1652	1688	1922	1742	2356	1670	1444	1466	1824	1662	1632	52608	1440	329.824	1283.33	139.262	1678.67	312.073	949	126.572	1879	259.762	1616.33	141.87
3.6.4.6	1420	1114	1056	840	866	912	930	1160	888	912	1046	852	1200	1114	1002	1006	1224	906	1324	1192	1206	1880	1650	1638	2074	1952	1948	2028	1752	2464	2150	1996	2114	2192	2526	2028	52562	1196.67	195.574	934	104.226	1075.33	124.898	1481.67	281.497	2036.33	236.705	2167.67	190.349
2.4.1.13	842	508	630	962	796	1072	1296	1272	1662	1044	1166	1112	840	1030	932	792	1136	692	1424	1258	1266	1056	1130	712	3138	2992	3096	3394	2726	3960	1550	1344	1394	1394	1380	1548	52546	660	169.009	1153.56	244.415	903.667	162.522	1141	245.271	3217.67	423.312	1435	90.1798
1.13.11.81	1548	1366	1146	1202	1014	1202	1160	1362	1046	1130	1166	1152	1822	1268	1126	1502	1640	1072	976	894	1136	1562	972	834	1822	1682	1854	1636	1912	2234	2116	1838	1724	2140	2424	1780	52460	1353.33	201.299	1159.33	99.7747	1405	298.671	1062.33	265.021	1856.67	212.534	2003.67	269.656
5.1.99.8	1548	1366	1146	1202	1014	1202	1160	1362	1046	1130	1166	1152	1822	1268	1126	1502	1640	1072	976	894	1136	1562	972	834	1822	1682	1854	1636	1912	2234	2116	1838	1724	2140	2424	1780	52460	1353.33	201.299	1159.33	99.7747	1405	298.671	1062.33	265.021	1856.67	212.534	2003.67	269.656
1.8.2.3	2032	1688	1462	1016	946	978	1104	1146	936	1094	1056	966	2538	1522	1246	1322	1346	902	1068	874	974	1358	1056	858	2000	1892	2150	1294	1564	1628	2002	2158	1898	2288	2004	1996	52362	1727.33	287.028	1026.89	76.2438	1479.33	557.294	1031.33	182.619	1754.67	316.212	2057.67	140.282
7.1.1.3	194	312	334	2188	1908	2096	2062	2492	2050	1858	1924	2088	1056	736	720	462	350	824	772	710	944	828	780	518	2352	2372	2352	2808	2310	2988	1012	946	996	1456	3110	1394	52302	280	75.2861	2074	189.021	691.333	253.969	758.667	141.476	2530.33	291.129	1485.67	824.999
3.1.3.37	1634	1076	1134	1780	1526	1634	1746	2078	1444	1996	2022	1920	1806	1310	1210	1438	1090	1460	940	798	1020	1274	1080	848	1414	1394	1440	1162	1512	1720	1540	1398	1532	1772	1792	1328	52268	1281.33	306.792	1794	226.866	1385.67	248.575	993.333	172.695	1440.33	180.92	1560.33	189.747
1.7.1.13	1408	1274	1278	1672	1266	1728	1714	1890	1674	1568	1692	1602	1726	1280	1034	1390	1498	1090	1046	928	1154	1258	1316	964	1722	1604	1672	1756	1616	2150	1332	1170	1272	1296	1816	1368	52224	1320	76.2365	1645.11	168.402	1336.33	259.274	1111	157.991	1753.33	203.032	1375.67	225.943
4.2.1.80	1430	986	934	1892	1590	2002	1876	2222	1542	1756	1756	1918	1622	1214	910	1038	980	1114	1026	802	1092	1340	1066	962	1644	1760	1734	1132	1716	1812	1378	1240	1406	1584	2176	1540	52192	1116.67	272.597	1839.33	208.466	1146.33	255.789	1048	176.59	1633	251.548	1554	328.468
6.3.5.13	450	378	356	1114	900	926	876	1064	726	1148	1066	1080	986	820	688	792	440	716	1022	884	1324	1856	788	606	1448	1444	1524	1278	1616	1916	3798	3256	3326	4148	4314	3092	52166	394.667	49.1664	988.889	139	740.333	180.499	1080	450.207	1537.67	216.194	3655.67	506.397
2.7.7.99	1436	1082	1124	1354	1054	1280	1304	1504	1116	1298	1472	1440	1616	1140	906	1294	1482	1078	970	842	1092	1266	1232	1042	2066	2046	2142	1980	1954	2426	1658	1566	1606	1750	1938	1544	52100	1214	193.401	1313.56	152.829	1252.67	264.459	1074	159.885	2102.33	171.928	1677	147.555
6.3.2.14	662	556	622	1804	1496	1960	1786	2140	1576	1974	1894	1780	1270	1062	990	740	628	828	1484	1152	1504	1684	1178	1108	1792	1710	1744	1924	2062	2444	1316	1252	1418	1322	1790	1396	52048	613.333	53.5288	1823.33	199.567	919.667	233.962	1351.67	236.881	1946	276.463	1415.67	192.879
2.7.1.184	1384	1008	1150	950	978	1132	1216	1274	1192	1378	1308	1270	2960	1772	1408	1640	1582	1156	1118	1034	1300	1648	796	618	1156	1190	1170	1308	1296	1716	2200	2130	1912	2300	2378	2012	52040	1180.67	189.867	1188.67	145.472	1753	628.435	1085.67	365.648	1306	211.024	2155.33	174.872
3.2.1.99	328	414	294	2032	1848	2960	2514	3272	3156	2396	2510	3856	1910	994	990	1294	916	1084	310	322	490	366	428	298	2064	1922	1988	2380	2048	2392	668	636	640	624	870	730	51944	345.333	61.8493	2727.11	639.109	1198	372.441	369	75.9763	2132.33	202.79	694.667	93.9418
1.20.4.1	1500	1248	1300	1194	1030	1188	1136	1430	1262	1162	1270	1322	1370	1042	954	1302	1604	1144	1172	990	1110	1668	1136	934	2086	1788	2002	1788	2192	2378	1636	1384	1510	1602	2272	1620	51726	1349.33	133.046	1221.56	115.632	1236	238.059	1168.33	261.091	2039	231.478	1670.67	309.218
2.7.8.7	1222	1190	1066	1414	1182	1510	1420	1706	1396	1602	1618	1590	1938	1304	1178	1390	1194	1254	936	830	1054	1468	900	688	1550	1430	1520	1832	1558	2114	1892	1616	1686	1906	1870	1632	51656	1159.33	82.3974	1493.11	158.222	1376.33	285.809	979.333	268.223	1667.33	257.053	1767	136.486
4.2.1.126	1570	892	1146	1432	1058	1538	1548	1964	1660	1594	1738	1638	1690	1346	1046	1576	1744	1388	850	910	854	1600	852	758	1666	1586	1546	2374	2244	2684	1154	1120	1236	1174	1366	1114	51656	1202.67	342.534	1574.44	244.765	1465	259.399	970.667	312.161	2016.67	480.556	1194	95.1042
3.5.1.68	1914	1108	1346	1730	1578	1708	1856	2394	1668	1912	1994	1926	1996	1446	1204	1424	1354	1208	1126	884	1240	1272	1416	1252	1186	1320	1404	1148	1556	1558	1196	1012	1016	1040	1148	1054	51594	1456	414.106	1862.89	241.481	1438.67	292.005	1198.33	179.699	1362	176.834	1077.67	76.2146
2.3.1.37	1128	944	978	1788	1404	1598	1584	1898	1292	1622	1518	1688	1752	1238	1022	1242	1066	1090	1328	948	1248	1912	1664	1340	1444	1314	1348	980	1460	1584	1650	1398	1562	1728	2056	1530	51346	1016.67	97.9047	1599.11	184.605	1235	269.185	1406.67	336.976	1355	206.757	1654	226.483
2.7.1.19	1852	1342	1456	1034	886	944	1110	1216	1048	952	1086	1220	1748	1464	1172	1576	1564	1164	1096	948	976	1466	1276	980	2164	2082	2324	1628	1906	2090	1470	1494	1618	1610	1518	1636	51116	1550	267.679	1055.11	116.787	1448	235.341	1123.67	207.107	2032.33	239.851	1557.67	71.8712
2.4.1.32	1206	834	1088	1636	1490	1932	2032	2236	2060	1916	2222	2028	1768	1510	1076	1126	1228	1208	974	888	1148	1006	816	722	1698	1538	1528	1560	1484	2046	1208	1166	1202	1148	1130	1224	51082	1042.67	190.098	1950.22	248.084	1319.33	266.451	925.667	150.431	1642.33	210.643	1179.67	37.2111
3.2.1.91	1828	1410	1218	1258	1156	1660	1522	1804	1588	1376	1666	1684	2220	1566	1192	1638	1570	1120	830	644	904	1198	786	660	1594	1496	1568	2054	1700	2258	1422	1334	1278	1194	1378	1282	51056	1485.33	311.9	1523.78	216.461	1551	392.52	837	202.997	1778.33	306.64	1314.67	81.0893
1.14.15.30	754	712	570	2236	2060	2136	2092	2550	1988	2208	2202	2326	1092	1068	882	1118	1052	1346	778	756	1016	1344	738	622	1392	1522	1434	1062	1414	1412	1596	1442	1494	1532	1550	1538	51034	678.667	96.4227	2199.78	165.848	1093	149.306	875.667	263.13	1372.67	158.874	1525.33	52.4087
3.4.25.2	1658	1124	1272	1466	1188	1406	1294	1780	1250	1482	1588	1312	1848	1270	1322	1362	1344	1086	1240	882	1018	1152	1208	1066	1700	1386	1648	2104	1848	2484	1400	1306	1312	1442	1480	1270	50998	1351.33	275.698	1418.44	185.143	1372	253.835	1094.33	133.551	1861.67	385.813	1368.33	84.4125
3.5.4.5	1408	916	1060	1026	882	1178	1020	1290	1112	1102	1176	1178	1954	1478	1332	1734	1722	1346	1012	844	1054	1616	846	796	1700	1594	1660	1848	1768	2370	1892	1634	1632	2000	2116	1690	50986	1128	252.951	1107.11	118.921	1594.33	248.671	1028	305.771	1823.33	281.779	1827.33	205.775
4.1.1.9	1196	1044	1000	2042	1650	1970	1812	2066	1570	2200	2168	1738	1866	1204	1078	1218	1196	1004	1024	868	1026	1448	1278	1164	1444	1558	1598	1442	1446	1884	1150	1016	1070	1170	1178	1184	50970	1080	102.84	1912.89	228.675	1261	308.184	1134.67	207.243	1562	171.334	1128	68.9812
1.3.1.104	868	748	778	1202	1088	1228	1206	1384	1434	1432	1540	1338	1740	1378	1186	1240	1166	1088	966	888	1116	1374	776	686	1878	1880	1720	2236	1952	2788	1788	1678	1656	1802	2002	1728	50958	798	62.45	1316.89	144.69	1299.67	236.296	967.667	248.81	2075.67	387.885	1775.67	125.063
7.6.2.8	1452	1008	1108	1458	1218	1514	1614	1508	1688	1544	1624	1328	1678	1470	1190	1438	1680	1362	1142	1022	1066	1214	838	664	1824	1664	1592	2838	2076	3128	972	922	878	950	1136	1098	50906	1189.33	232.906	1499.56	148.653	1469.67	188.919	991	204.672	2187	645.124	992.667	102.009
4.2.1.82	866	730	766	1812	1586	1856	1784	2112	1888	1824	2052	1874	2028	1438	1286	1448	1056	1232	916	790	1082	1104	846	720	1896	1916	1746	1520	1732	2032	1176	1048	1206	1200	1192	1146	50906	787.333	70.4651	1865.33	152.299	1414.67	333.586	909.667	156.11	1807	180.079	1161.33	59.5405
3.1.3.82	1198	1008	1118	1326	1134	1506	1364	1608	1416	1612	1712	1408	1494	1242	1014	1092	1250	1020	1150	888	1170	1008	910	734	2240	1920	2050	2346	1792	2514	1430	1484	1366	1444	1354	1386	50708	1108	95.3939	1454	176.207	1185.33	183.341	976.667	167.091	2143.67	271.969	1410.67	50.3534
3.1.3.83	1198	1008	1118	1326	1134	1506	1364	1608	1416	1612	1712	1408	1494	1242	1014	1092	1250	1020	1150	888	1170	1008	910	734	2240	1920	2050	2346	1792	2514	1430	1484	1366	1444	1354	1386	50708	1108	95.3939	1454	176.207	1185.33	183.341	976.667	167.091	2143.67	271.969	1410.67	50.3534
6.3.1.12	1594	964	1140	1456	1312	1432	1310	1432	1364	1348	1448	1332	1658	1186	1044	1530	1120	1232	996	982	984	1182	950	680	1990	1860	2018	1932	1882	2572	1394	1320	1300	1442	1558	1422	50366	1232.67	325.062	1381.56	60.0981	1295	243.504	962.333	161.312	2042.33	266.46	1406	93.2009
1.5.3.19	2410	1586	1950	1080	996	1212	1314	1340	1312	1252	1260	1110	1830	1228	1170	1380	778	1258	944	752	936	960	1092	968	1246	1332	1430	1094	1256	1402	2246	1946	1958	2148	2406	1746	50328	1982	412.931	1208.44	119.928	1274	340.463	942	109.215	1293.33	122.759	2075	237.782
2.1.1.207	1416	1090	1200	1130	938	1178	1224	1380	1296	1118	1338	1256	1826	1224	1084	1174	1114	860	1104	848	994	1384	1084	888	1710	1516	1568	1680	1702	2032	2000	1842	1864	1990	2366	1878	50296	1235.33	165.847	1206.44	134.513	1213.67	325.103	1050.33	192.775	1701.33	179.999	1990	195.857
4.2.1.180	552	506	486	2582	2296	2484	2378	2836	1948	2558	2642	2580	1106	930	716	656	280	1212	694	698	924	1096	672	576	1712	1704	1650	1322	1596	1790	1224	1142	1048	1118	1270	1092	50076	514.667	33.8428	2478.22	251.679	816.667	339.648	776.667	193.869	1629	163.838	1149	83.3379
1.14.99.44	760	790	628	584	500	634	718	764	690	614	748	738	1802	1342	1020	1338	1536	858	972	970	1438	1640	816	700	1810	1756	1858	1632	1938	2370	2860	2436	2458	2672	3186	2240	49816	726	86.1858	665.556	88.599	1316	341.507	1089.33	368.538	1894	254.775	2642	341.249
1.8.1.8	938	836	670	772	722	888	968	1026	1046	1002	1014	960	1596	1200	976	1194	1140	934	958	818	1212	1250	730	498	2022	1944	1990	2066	2016	2648	2230	1998	2008	2394	3036	2112	49812	814.667	135.268	933.111	115.737	1173.33	235.422	911	289.727	2114.33	264.501	2296.33	391.705
3.1.1.73	5362	3490	4168	1812	1404	1686	1854	2176	1510	2072	2134	1832	974	728	636	444	358	672	490	370	524	560	688	638	1222	1430	1594	1420	1560	1784	664	620	652	612	920	654	49714	4340	947.778	1831.11	268.375	635.333	218.243	545	112.618	1501.67	190.609	687	115.971
4.2.1.116	466	466	374	1548	1250	1396	1324	1492	1262	1428	1472	1130	1764	1248	1048	922	708	842	1308	1118	1312	2050	1296	1296	2010	2000	2114	1716	2290	2502	1454	1386	1372	1480	1526	1340	49710	435.333	53.1162	1366.89	135.418	1088.67	378.588	1396.67	328.572	2105.33	269.55	1426.33	71.57
3.2.2.9	730	682	714	1710	1488	1704	1656	2052	1738	1720	2020	1778	1286	1030	932	924	812	920	892	848	1150	1128	838	578	1292	1340	1274	1328	1418	1862	1838	1674	1700	2096	2786	1708	49646	708.667	24.4404	1762.89	175.226	984	163.281	905.667	211.937	1419	222.677	1967	430.874
6.2.1.8	1986	1214	1210	1998	1736	1986	2194	2526	1792	2604	2572	2238	1970	1458	1144	892	930	898	886	710	786	1170	932	770	1086	1016	1080	982	1062	1196	1088	1112	1008	1170	1098	990	49490	1470	446.874	2182.89	330.734	1215.33	428.989	875.667	165.265	1070.33	73.4239	1077.67	67.4735
3.4.14.13	1082	1070	782	1040	744	1026	1092	1376	1190	1072	1074	1016	1622	1176	998	1346	1796	1092	1180	984	1068	1184	834	546	1816	1586	1610	2196	1822	2364	1978	1672	1820	2146	2282	1758	49440	978	169.847	1070	166.045	1338.33	313.956	966	244.079	1899	315.83	1942.67	236.706
3.3.2.10	1092	844	798	1274	1098	1254	1308	1458	1050	1126	1176	1126	1414	1072	882	1198	1046	910	1152	968	1348	2102	1166	1114	1952	1800	1912	1378	2160	2074	1548	1604	1660	1612	2022	1550	49248	911.333	158.143	1207.78	127.724	1087	197.236	1308.33	407.375	1879.33	275.915	1666	179.395
1.14.15.3	1822	1184	1304	822	744	912	766	988	874	738	778	954	1552	1078	938	1904	2074	1378	1240	960	1320	2060	1220	954	1168	1048	1146	1012	1504	1460	2022	1736	2010	2368	2928	2134	49100	1436.67	339.059	841.778	93.8586	1487.33	447.939	1292.33	405.7	1223	209.394	2199.67	411.253
2.7.1.113	1926	1332	1446	876	1038	1248	1162	1292	1040	1266	1354	1234	2066	1346	1136	1734	2010	1260	948	768	928	898	708	650	1768	1436	1588	2362	1626	2580	1280	1336	1072	1518	1464	1306	49002	1568	315.233	1167.78	153.67	1592	399.56	816.667	125.071	1893.33	464.912	1329.33	156.827
4.2.1.84	1108	738	700	2128	2014	2180	2246	2706	1800	2470	2410	1988	1840	1336	1054	970	762	962	832	796	914	1228	1118	1008	1338	1202	1378	920	1398	1398	1112	930	948	944	1162	950	48988	848.667	225.392	2215.78	277.947	1154	384.215	982.667	168.17	1272.33	187.695	1007.67	101.662
3.1.3.76	1090	844	798	1262	1072	1252	1306	1458	1044	1126	1176	1126	1410	1062	880	1194	1046	902	1150	962	1340	2092	1164	1114	1934	1788	1894	1350	2114	2050	1548	1602	1660	1608	2018	1548	48984	910.667	157.001	1202.44	130.644	1082.33	197.498	1303.67	404.628	1855	272.904	1664	178.451
1.1.1.28	832	724	732	1040	990	1244	1140	1374	1150	1188	1234	1288	1778	1106	1018	1164	972	920	876	858	1116	2020	746	766	1848	1674	1798	1760	1868	2188	2096	1760	1752	1960	2038	1804	48822	762.667	60.1775	1183.11	119.629	1159.67	315.583	1063.67	486.692	1856	176.712	1901.67	149.508
1.18.6.1	304	750	430	1368	1322	1702	1394	1442	2162	1386	1608	1694	1210	1230	1290	1508	1498	1756	1064	1014	1008	1208	772	802	2000	1916	1912	2020	1886	2110	1124	1184	1154	1254	1204	1106	48792	494.667	229.925	1564.22	266.442	1415.33	211.515	978	164.866	1974	85.1352	1171	54.5344
4.1.1.38	682	1024	612	866	724	1044	960	1138	1164	958	1130	1304	1044	754	652	790	924	768	640	622	718	752	442	274	1694	1978	1944	1044	1426	1624	3422	2952	2976	3524	3428	2788	48786	772.667	220.457	1032	175.168	822	139.393	574.667	182.484	1618.33	348.72	3181.67	311.657
2.4.1.339	1108	1318	1056	1604	1184	1618	1472	1616	1662	1526	1794	1460	1744	1366	1162	1326	1350	964	992	808	1038	648	520	578	2234	1976	2222	2348	1814	2808	930	836	802	992	862	964	48702	1160.67	138.713	1548.44	170.54	1318.67	258.657	764	217.524	2233.67	342.222	897.667	75.5928
2.4.1.340	1108	1318	1056	1604	1184	1618	1472	1616	1662	1526	1794	1460	1744	1366	1162	1326	1350	964	992	808	1038	648	520	578	2234	1976	2222	2348	1814	2808	930	836	802	992	862	964	48702	1160.67	138.713	1548.44	170.54	1318.67	258.657	764	217.524	2233.67	342.222	897.667	75.5928
6.2.1.25	1508	1098	1100	2032	1664	1994	1888	2492	1490	2550	2416	2106	1468	1224	1040	1030	864	1094	992	862	928	942	1318	1156	1064	1038	1280	958	1280	1384	1108	990	1078	1118	1094	970	48618	1235.33	236.138	2070.22	365.902	1120	206.219	1033	171.22	1167.33	169.445	1059.67	63.4781
1.1.1.426	1002	872	886	1344	1220	1430	1534	1866	1438	1620	1570	1530	1490	1070	782	900	894	676	1104	982	1216	1188	944	752	1892	1850	1926	1900	1942	2372	1480	1340	1366	1434	1350	1332	48494	920	71.3583	1505.78	182.514	968.667	287.348	1031	174.364	1980.33	194.457	1383.67	59.7249
1.1.1.27	554	546	522	1196	1050	1488	1576	1598	1502	1196	1330	1480	1844	1530	1068	1302	1218	1192	1070	1110	1362	1446	712	504	1222	1102	1232	984	1312	1494	2116	1930	1984	2244	2442	2002	48460	540.667	16.6533	1379.56	194.164	1359	282.901	1034	365.782	1224.33	175.04	2119.67	193.698
1.14.13.208	2316	1362	1588	1556	1426	1616	1458	1754	1154	1696	1788	1676	1588	1350	1386	1314	1110	1258	756	680	904	858	1428	1240	898	994	1096	654	1168	1004	1572	1442	1502	1574	1676	1446	48288	1755.33	498.527	1569.33	199.103	1334.33	157.37	977.667	292.953	969	179.914	1535.33	89.9214
2.8.1.10	918	956	774	1726	1496	1616	1734	2038	1400	1966	1888	1884	1240	1170	882	1070	1036	1238	1174	1080	1118	1186	1374	1158	1510	1412	1570	1474	1578	1654	1130	1060	1048	1094	1466	1158	48276	882.667	96.0069	1749.78	215.756	1106	138.454	1181.67	101.999	1533	85.6575	1159.33	155.844
1.11.1.25	1516	1008	1202	1520	1300	1402	1716	2186	1356	1762	1970	1694	1872	1316	978	1210	1138	1050	1008	712	960	1208	1060	1134	1222	1038	1132	1588	1472	1642	1314	1178	1282	1248	1280	1212	47886	1242	256.351	1656.22	294.857	1260.67	322.082	1013.67	172.225	1349	252.205	1252.33	50.2381
3.1.3.45	1566	1080	1204	914	870	1072	998	1294	1230	1282	1352	1256	1762	1192	1106	1302	1772	1114	962	834	910	928	880	754	1830	1678	1846	2518	1970	2962	1236	1182	1230	1192	1368	1152	47798	1283.33	252.526	1140.89	179.978	1374.67	311.986	878	74.694	2134	498.645	1226.67	75.9544
4.2.2.2	754	458	580	1868	1788	2836	2028	2688	2090	1624	1680	2312	1146	890	644	928	1188	1426	598	576	592	882	660	640	1632	1452	1440	3178	2338	2698	708	650	686	736	610	722	47726	597.333	148.759	2101.56	431.826	1037	273.475	658	114.179	2123	727.693	685.333	47.6431
3.1.3.50	1140	990	812	1266	1158	1492	1532	1690	1610	1624	1834	1652	1746	1354	1038	1082	1034	1182	900	726	800	1054	666	564	1512	1486	1602	1638	1354	1884	1574	1346	1450	1502	1860	1436	47590	980.667	164.199	1539.78	211.188	1239.33	275.898	785	174.524	1579.33	179.331	1528	179.27
3.1.3.22	1140	990	812	1266	1158	1492	1532	1690	1610	1624	1834	1652	1746	1354	1038	1082	1034	1182	900	726	800	1054	666	564	1512	1486	1602	1638	1354	1884	1574	1346	1450	1502	1860	1436	47590	980.667	164.199	1539.78	211.188	1239.33	275.898	785	174.524	1579.33	179.331	1528	179.27
1.1.1.336	984	746	776	1716	1318	1516	1460	1600	1354	1516	1582	1438	1724	1406	1056	1656	1920	1712	938	788	934	762	612	476	1468	1188	1328	1658	1198	2232	1236	1160	1126	1534	1950	1352	47420	835.333	129.62	1500	124.386	1579	304.756	751.667	181.599	1512	394.735	1393	310.496
2.7.7.68	672	552	552	1346	1226	1414	1270	1392	1208	1264	1528	1330	1904	1286	1040	1398	1182	1166	922	836	1158	1312	734	794	1748	1680	1702	1390	1438	1956	1832	1462	1508	1706	1916	1528	47352	592	69.282	1330.89	102.475	1329.33	306.246	959.333	227.402	1652.33	209.454	1658.67	188.126
2.7.7.105	672	552	552	1346	1226	1414	1270	1392	1208	1264	1528	1330	1904	1286	1040	1398	1182	1166	922	836	1158	1312	734	794	1748	1680	1702	1390	1438	1956	1832	1462	1508	1706	1916	1528	47352	592	69.282	1330.89	102.475	1329.33	306.246	959.333	227.402	1652.33	209.454	1658.67	188.126
1.14.13.235	874	682	688	1902	1802	1878	1902	2178	1534	1948	1968	1896	1502	1142	900	820	460	834	952	954	1088	1234	966	900	1726	1794	1806	1080	1860	1806	1028	858	850	1020	1396	928	47156	748	109.16	1889.78	168.575	943	350.494	1015.67	123.777	1678.67	296.396	1013.33	202.377
3.2.1.31	894	970	812	1072	1120	1392	1410	1372	1448	1390	1446	1624	1188	742	654	946	966	896	722	718	844	1026	644	472	2316	2524	2426	2472	2636	2826	1230	1174	1130	1232	1144	1218	47096	892	79.019	1363.78	169.492	898.667	187.03	737.667	186.777	2533.33	178.212	1188	44.9355
1.1.99.3	1202	972	896	1536	1244	1432	1678	1744	1260	1868	2074	1604	1670	1162	1138	1066	1276	1042	894	720	1004	874	1044	1050	1590	1602	1632	1300	1660	1668	1284	1170	1264	1216	1124	1118	47078	1023.33	159.328	1604.44	273.362	1225.67	232.779	931	127.592	1575.33	138.348	1196	70.3022
2.1.1.376	1144	1284	1014	1030	1002	1542	1554	1414	1730	1212	1616	1196	994	1430	832	962	446	1080	1654	1456	1696	584	648	494	1900	1394	1428	2884	1362	3272	1112	1104	1002	1182	1134	1144	46932	1147.33	135.031	1366.22	264.959	957.333	321.558	1088.67	570.244	2040	836.816	1113	60.936
1.3.7.11	1058	656	1024	1688	1452	1578	1696	1936	1532	1676	1770	1556	1484	1230	844	1734	2084	1486	1082	908	1156	556	1056	1358	1408	1148	1152	2016	1126	2174	846	896	754	942	904	960	46926	912.667	222.929	1653.78	144.677	1477	423.397	1019.33	270.45	1504	471.971	883.667	74.8697
1.3.1.101	1058	656	1024	1688	1452	1578	1696	1936	1532	1676	1770	1556	1484	1230	844	1734	2084	1486	1082	908	1156	556	1056	1358	1408	1148	1152	2016	1126	2174	846	896	754	942	904	960	46926	912.667	222.929	1653.78	144.677	1477	423.397	1019.33	270.45	1504	471.971	883.667	74.8697
1.21.98.5	1252	944	1042	2168	1714	1910	1938	2116	1792	2266	2486	2060	1580	1174	994	906	636	1254	810	686	888	836	1218	1222	1020	876	868	1528	1204	1710	972	920	898	978	994	928	46788	1079.33	157.357	2050	241.541	1090.67	323.493	943.333	224.356	1201	350.797	948.333	38.1453
1.8.5.2	1272	790	974	1422	1352	1534	1482	1744	1590	1654	1664	1610	1806	1338	974	1198	1056	1330	606	546	700	602	530	432	1948	1832	1772	1910	1628	2302	1248	1126	1040	1272	1404	1076	46764	1012	243.237	1561.33	125.479	1283.67	294.277	569.333	89.9303	1898.67	227.591	1194.33	138.104
3.1.1.32	1570	914	1242	680	690	914	1016	1038	1278	912	1018	958	2254	1468	1322	1704	1734	1226	932	756	928	1126	714	488	1640	1614	1748	1844	1710	2146	1546	1380	1392	1498	1860	1488	46748	1242	328	944.889	182.817	1618	371.249	824	220.592	1783.67	195.474	1527.33	175.183
2.7.1.74	1736	1214	1284	970	902	1222	1290	1328	1524	1034	1236	1068	2344	1632	1346	1754	2508	1424	786	768	912	966	478	476	1488	1382	1338	1798	1498	2084	1190	1068	1132	1134	1168	1170	46652	1411.33	283.34	1174.89	197.563	1834.67	483.285	731	210.435	1598	287.246	1143.67	43.3297
2.7.1.76	1736	1214	1284	970	902	1222	1290	1328	1524	1034	1236	1068	2344	1632	1346	1754	2508	1424	786	768	912	966	478	476	1488	1382	1338	1798	1498	2084	1190	1068	1132	1134	1168	1170	46652	1411.33	283.34	1174.89	197.563	1834.67	483.285	731	210.435	1598	287.246	1143.67	43.3297
2.4.99.23	1566	986	1214	1226	1040	1348	1506	1792	1406	1786	1804	1432	1186	980	808	802	1014	854	862	920	856	674	776	570	1824	1694	1834	2526	1676	2470	1280	1258	1230	1152	1094	1182	46628	1255.33	292.201	1482.22	269.237	940.667	149.301	776.333	132.19	2004	388.49	1199.33	70.0362
2.5.1.143	924	1014	880	1260	1064	1394	1518	1490	1452	1404	1700	1254	1312	1136	764	1058	1250	1088	1062	950	1032	836	868	814	1682	1692	1548	2482	1800	2700	1238	1172	1110	1248	1198	1122	46516	939.333	68.3032	1392.89	183.077	1101.33	191.59	927	104.221	1984	481.888	1181.33	57.6703
3.2.1.35	806	454	790	2386	2352	2200	2218	2602	1806	2334	2334	2308	1196	1230	856	692	602	892	482	448	734	710	1082	966	756	756	726	832	1024	1058	1502	1434	1414	1430	1664	1402	46478	683.333	198.77	2282.22	212.602	911.333	256.832	737	253.279	858.667	145.919	1474.33	99.2001
1.5.7.3	682	666	500	986	740	1030	884	994	996	1000	1090	1008	1554	1072	1010	1158	850	684	958	822	1018	1114	1084	922	2248	2072	2030	1928	2098	2800	1722	1478	1562	1898	2076	1604	46338	616	100.777	969.778	101.333	1054.67	297.183	986.333	108.432	2196	313.649	1723.33	225.983
2.3.1.82	1006	840	724	1142	1074	1290	1318	1500	1592	1184	1480	1338	1902	1396	1110	1302	1300	1140	790	702	864	1062	598	490	1320	1128	1126	1012	1164	1408	2014	1864	1778	2168	2308	1892	46326	856.667	141.737	1324.22	174.552	1358.33	287.37	751	202.456	1193	144.686	2004	201.312
7.2.2.13	608	1046	524	1220	1058	1232	1118	1472	1146	1480	1690	1468	1396	1206	932	1224	1166	1508	854	682	904	918	772	664	1072	1066	1112	868	1274	1076	2274	2072	2128	2492	2538	1982	46242	726	280.293	1320.44	213.593	1238.67	198.948	799	110.321	1078	129.504	2247.67	228.229
2.3.3.15	1446	1124	1250	1200	996	1042	1138	1220	976	1122	1084	1024	2306	1500	1202	1814	1736	1340	894	720	694	1212	1326	1384	1364	1350	1336	1096	1320	1578	1360	1238	1370	1674	1494	1280	46210	1273.33	162.263	1089.11	87.213	1649.67	395.962	1038.33	307.614	1340.67	153.147	1402.67	159.382
1.11.1.7	564	454	370	2134	1806	1960	1868	2550	1466	1620	1596	1688	1750	1390	1136	1192	1096	1110	772	700	762	1686	1156	1498	1408	1318	1222	900	1072	1394	1094	1032	1034	1094	1130	1050	46072	462.667	97.2899	1854.22	330.902	1279	254.649	1095.67	421.106	1219	199.763	1072.33	39.6468
2.1.1.264	866	734	762	794	680	1054	1046	1124	1178	784	874	882	1604	1322	1328	1372	1382	1142	700	658	798	982	692	500	1812	1808	1986	1626	1928	2098	1704	1544	1656	1914	2530	1764	45628	787.333	69.5509	935.111	171.57	1358.33	148.418	721.667	160.087	1876.33	164.504	1852	353.965
1.11.1.28	966	860	736	1260	1178	1430	1470	1568	1338	1558	1598	1368	1836	1340	1012	1266	1218	1096	850	712	926	1000	720	600	1538	1438	1356	1316	1410	1776	1422	1224	1292	1414	2122	1384	45598	854	115.117	1418.67	145.262	1294.67	290.229	801.333	150.006	1472.33	167.071	1476.33	325.545
5.1.1.4	824	732	640	1178	1064	1322	1204	1336	1256	1504	1448	1332	1604	1230	960	910	994	872	1106	886	1096	746	856	748	2244	2056	2168	2164	1912	2634	1124	1028	896	1074	1198	1090	45436	732	92	1293.78	135.88	1095	279.172	906.333	160.974	2196.33	243.397	1068.33	101.724
1.1.5.5	1268	882	916	1672	1334	1664	1762	2072	1722	1800	2036	1642	2084	1532	1208	1606	1812	1458	662	542	730	820	834	674	1086	982	1014	930	1068	1238	1106	1086	952	1056	1046	1096	45392	1022	213.719	1744.89	219.907	1616.67	302	710.333	109.27	1053	106.986	1057	56.4092
5.4.99.27	1098	1092	936	856	632	948	864	884	960	688	804	828	1522	1116	988	1366	1540	1078	1028	928	1176	1196	1106	1036	1994	2026	2096	1982	1696	2244	1546	1350	1330	1580	1332	1484	45330	1042	91.8477	829.333	109.325	1268.33	239.043	1078.33	101.07	2006.33	179.98	1437	113.65
1.5.1.28	1150	988	1060	676	726	1000	1008	988	1138	744	1062	856	808	854	594	942	974	756	1440	1212	1622	1366	746	626	1898	1898	1808	2312	1752	2908	1580	1548	1394	1680	1620	1462	45196	1066	81.1665	910.889	165.058	821.333	137.885	1168.67	398.268	2096	444.002	1547.33	104.634
3.4.14.4	2218	1532	1658	862	678	794	898	1222	870	952	950	1004	1472	1174	1076	1534	2012	1128	998	660	856	1686	982	938	1572	1406	1258	2472	2178	2490	990	934	1012	844	866	946	45122	1802.67	365.165	914.444	150.289	1399.33	354.321	1020	348.914	1896	550.682	932	66.4289
1.6.3.4	458	598	520	1496	1398	1672	1700	1924	1786	2096	2050	1834	1306	962	740	956	1082	956	1170	948	792	1908	832	706	1422	1426	1476	1868	1484	2106	674	672	714	834	1592	904	45062	525.333	70.1522	1772.89	234.689	1000.33	186.159	1059.33	445.616	1630.33	287.448	898.333	352.385
1.21.4.1	984	714	876	1222	1212	1376	1598	1716	1584	1462	1498	1416	1238	1034	748	912	742	706	1386	1088	1250	1064	920	660	2038	1850	1768	1682	1728	2350	1008	934	914	990	1114	1168	44950	858	135.897	1453.78	168.892	896.667	208.797	1061.33	254.073	1902.67	252.402	1021.33	100.405
7.1.1.8	1592	1078	1172	1118	1030	1296	1286	1412	1002	1102	1148	1146	1584	1124	886	1464	1548	1096	912	744	992	1198	1182	876	1574	1374	1604	972	1282	1302	1496	1480	1446	1514	1418	1454	44904	1280.67	273.688	1171.11	134.209	1283.67	286.86	984	178.612	1351.33	230.247	1468	35.2817
[truncated: 2,875 more rows]
[truncated: 1 more columns]
