# Supplementary material for: Divergent microbial community and functional dynamics in mangrove sediments along a polycyclic aromatic hydrocarbons (PAHs) gradient in China
Source: Research Square preprint supplement (doi:10.21203/rs.3.rs-7178259/v1), 2025-09-17
Supplement: Supplementary file 8 [file 77422e77aec44f26d51cf561.xlsx]

## Sheet: PAHdegradaer genus
Domain	Kingdom	Phylum	Class	Order	Family	Genus	DY_1	DY_2	DY_3	FG_SC_1	FG_SC_2	FG_SC_3	FG_WR_1	FG_WR_2	FG_WR_3	CPT_LW_1	CPT_LW_2	CPT_LW_3	CPT_MZ_1	CPT_MZ_2	CPT_MZ_3	CPT_SW_1	CPT_SW_2	CPT_SW_3	M1_1_1	M1_1_2	M1_1_3	M1_2_1	M1_2_2	M1_2_3	M2_1_1	M2_1_2	M2_1_3	M2_2_1	M2_2_2	M2_2_3	M3_1_1	M3_1_2	M3_1_3	M3_2_1	M3_2_2	M3_2_3	Total	PAH%	DY	DY%	FG	FG%	CPT
d__Bacteria	k__unclassified_d__Bacteria	p__Actinomycetota	c__Actinomycetes	o__Mycobacteriales	f__Mycobacteriaceae	g__Mycobacterium	48094	63826	40576	111660	101746	91806	107468	79712	121054	256316	207032	223796	215816	276504	184568	245856	236144	247468	46214	46456	72126	77086	41582	34668	77476	75200	79512	65112	91862	103978	320976	296578	313578	379076	417378	290032	5688332	0.185671	50832	0.10194	102241	0.150218	232611
d__Bacteria	k__unclassified_d__Bacteria	p__Actinomycetota	c__Actinomycetes	o__Propionibacteriales	f__Nocardioidaceae	g__Nocardioides	53850	65302	45002	116330	91408	80796	180134	65492	281338	84026	75100	100270	94752	101830	102812	102036	92002	128716	76332	77526	116562	142400	61796	49956	152024	167592	179146	115088	153440	178550	375574	323192	322316	395816	428766	305448	5482720	0.178959	54718	0.109733	135916	0.199695	97949.3
d__Bacteria	k__unclassified_d__Bacteria	p__Pseudomonadota	c__Gammaproteobacteria	o__Moraxellales	f__Moraxellaceae	g__Acinetobacter	3548	2936	12548	2978	2370	2360	2518	4266	2290	2832	2446	3588	3964	4880	5608	2860	3560	4928	1878	1700	2008	2634	2382	2484	5682	3350	3472	3554	3050	3794	84484	55050	228528	332168	1831898	448794	3087390	0.100774	6344	0.0127224	2797	0.00410949	3851.78
d__Bacteria	k__unclassified_d__Bacteria	p__Pseudomonadota	c__Gammaproteobacteria	o__Pseudomonadales	f__Pseudomonadaceae	g__Pseudomonas	55070	42146	42036	71288	51640	51852	46840	49264	36184	44918	41764	48220	47406	53510	43232	44272	46376	44612	33360	28086	36846	39362	39602	37106	56574	53392	56530	44104	51938	59646	62580	59756	59602	59328	57260	57590	1753292	0.0572286	46417.3	0.0930866	51178	0.0751932	46034.4
d__Bacteria	k__unclassified_d__Bacteria	p__Pseudomonadota	c__Alphaproteobacteria	o__Sphingomonadales	f__Sphingomonadaceae	g__Novosphingobium	106288	34694	75170	48506	35976	53134	37192	19410	47304	69704	67998	101788	67214	68392	60058	77262	85108	88024	8934	7278	8856	10852	11378	10110	21690	22764	24326	14782	21616	23160	62216	56454	59688	60268	66732	60316	1694642	0.0553142	72050.7	0.144492	40253.7	0.0591427	76172
d__Bacteria	k__unclassified_d__Bacteria	p__Bacteroidota	c__Flavobacteriia	o__Flavobacteriales	f__Flavobacteriaceae	g__Flavobacterium	17900	12450	57416	138068	30854	52418	56296	44124	18262	38704	29186	41938	61478	96742	79948	47948	53660	109052	7392	6718	6840	12328	6434	5448	16024	14890	15508	27516	20282	26100	10980	10388	10822	10408	10730	10332	1215584	0.0396774	29255.3	0.0586695	56670.3	0.0832629	62072.9
d__Bacteria	k__unclassified_d__Bacteria	p__Pseudomonadota	c__Gammaproteobacteria	o__Pseudomonadales	f__Marinobacteraceae	g__Marinobacter	23632	17712	17856	32286	25642	21094	24098	24162	55214	28016	25936	31500	31126	35132	29154	28854	30326	30000	21934	18286	22352	26202	29014	28940	43024	41222	43376	32410	38410	43444	27642	26604	27080	25678	24510	26508	1058376	0.0345461	19733.3	0.0395738	30416	0.0446887	30004.9
d__Bacteria	k__unclassified_d__Bacteria	p__Actinomycetota	c__Actinomycetes	o__Mycobacteriales	f__Nocardiaceae	g__Rhodococcus	8384	8764	6606	17606	14368	11620	10180	7174	10458	19458	16160	19694	19060	20202	17542	19030	19098	18974	14030	13864	21736	25016	11030	9076	26284	27070	28532	20786	27278	30914	59790	51918	51972	63226	68924	49422	865246	0.0282422	7918	0.015879	11901	0.0174855	18802
d__Bacteria	k__unclassified_d__Bacteria	p__Pseudomonadota	c__Alphaproteobacteria	o__Hyphomicrobiales	f__Rhizobiaceae	g__Rhizobium	16710	13600	14848	30972	21796	63132	17760	14950	17558	38638	31036	35720	37620	46100	31352	37896	38838	38042	12450	9826	11992	13862	17718	13156	17824	16764	17652	13932	18834	20792	18546	16816	17304	20542	21698	17874	844150	0.0275536	15052.7	0.030187	27694.7	0.0406904	37249.1
d__Bacteria	k__unclassified_d__Bacteria	p__Bacillota	c__Bacilli	o__Bacillales	f__Paenibacillaceae	g__Paenibacillus	17360	14876	14378	28804	24638	19160	23886	23938	20158	23348	20930	25152	26304	26722	28950	26732	30942	27612	14940	13562	17640	15384	11982	10182	28528	24860	25542	37756	25660	39780	20600	19502	18942	20826	22276	20662	812514	0.026521	15538	0.0311603	23430.7	0.0344255	26299.1
d__Bacteria	k__unclassified_d__Bacteria	p__Pseudomonadota	c__Alphaproteobacteria	o__Sphingomonadales	f__Sphingomonadaceae	g__Sphingomonas	19274	13664	16032	27176	19764	17700	19210	16508	16102	25676	22656	26834	26008	30996	21736	27258	27178	25992	13274	10502	13382	16466	22246	19666	19874	19594	20390	17886	22582	24162	19320	17422	17518	19066	19870	17108	730092	0.0238307	16323.3	0.0327353	19410	0.0285181	26037.1
d__Bacteria	k__unclassified_d__Bacteria	p__Actinomycetota	c__Actinomycetes	o__Micrococcales	f__Micrococcaceae	g__Arthrobacter	7356	7786	5994	18072	13270	10596	14726	8158	14942	14752	12716	16566	16068	16590	17704	16754	16508	18912	9400	8688	13674	16216	7486	6108	21130	22270	24224	16180	20114	24782	41116	36246	36428	43658	51238	34536	680964	0.0222271	7045.33	0.0141289	13294	0.0195322	16285.6
d__Bacteria	k__unclassified_d__Bacteria	p__Actinomycetota	c__Actinomycetes	o__Mycobacteriales	f__Nocardiaceae	g__Nocardia	7296	6836	5402	15272	12764	10490	8988	5588	10424	21020	17872	19970	19680	21202	16938	20342	20186	19842	9960	9688	13216	16438	9450	8448	17990	17506	18764	14374	18508	20864	29108	25492	25672	30208	32112	24654	602564	0.0196681	6511.33	0.013058	10587.7	0.0155559	19672.4
d__Bacteria	k__unclassified_d__Bacteria	p__Pseudomonadota	c__Alphaproteobacteria	o__Hyphomicrobiales	f__Stappiaceae	g__Stappia	7410	5922	5732	17436	12042	8864	8226	5698	9972	30974	24956	27844	28504	35328	24170	27138	28082	26916	10046	8256	10944	9816	14822	10536	13192	12582	13470	9066	12742	13752	9904	8592	9084	10560	10828	9812	533218	0.0174046	6354.67	0.0127438	10373	0.0152405	28212.4
d__Bacteria	k__unclassified_d__Bacteria	p__Pseudomonadota	c__Gammaproteobacteria	o__Vibrionales	f__Vibrionaceae	g__Vibrio	10824	8626	8834	20088	9666	8472	8072	9128	7992	10978	11018	14008	12894	14028	15934	10864	12170	12212	12998	11096	14052	14754	12350	11450	20424	19418	20244	16482	18686	22312	12984	12360	12834	11856	14426	12988	477522	0.0155866	9428	0.0189072	10569.7	0.0155295	12678.4
d__Bacteria	k__unclassified_d__Bacteria	p__Pseudomonadota	c__Alphaproteobacteria	o__Hyphomicrobiales	f__Methylobacteriaceae	g__Methylobacterium	8972	7346	6782	20414	14716	12056	11066	9920	9728	20680	17474	19636	19328	23782	15378	18894	18934	18110	8452	7036	9030	10448	11218	9512	11354	10638	11184	9494	12502	13488	12626	11882	11510	13520	13748	12242	473100	0.0154423	7700	0.0154418	12983.3	0.0190758	19135.1
d__Bacteria	k__unclassified_d__Bacteria	p__Bacillota	c__Bacilli	o__Bacillales	f__Bacillaceae	g__Bacillus	13274	9168	10784	14354	11422	8416	9764	9570	9432	12074	10766	13300	13482	13788	14082	13648	15450	12890	7872	6754	8784	7826	6864	5908	12446	11342	11472	15268	12360	17738	13478	11092	11748	13934	67420	12542	470512	0.0153578	11075.3	0.0222108	10493	0.0154168	13275.6
d__Bacteria	k__unclassified_d__Bacteria	p__Pseudomonadota	c__Betaproteobacteria	o__Burkholderiales	f__Burkholderiaceae	g__Burkholderia	21502	13718	15222	26704	19498	15822	11466	11210	8910	14260	12362	13448	13946	15750	11856	14666	15154	13672	5746	5126	6150	7358	8202	7022	11474	11258	11594	9248	10260	11764	12432	11648	11840	12848	12648	11010	446794	0.0145836	16814	0.0337193	15601.7	0.0229227	13901.6
d__Bacteria	k__unclassified_d__Bacteria	p__Pseudomonadota	c__Gammaproteobacteria	o__Alteromonadales	f__Shewanellaceae	g__Shewanella	10250	8000	7926	11032	9146	7892	7630	8108	7140	10208	9370	12140	12042	13776	11398	10604	11252	11200	11076	8766	12542	10678	11338	9750	17934	17530	18346	14312	16638	18738	13744	13158	13226	12308	11926	13018	424142	0.0138443	8725.33	0.017498	8491.33	0.0124759	11332.2
d__Bacteria	k__unclassified_d__Bacteria	p__Pseudomonadota	c__Alphaproteobacteria	o__Rhodobacterales	f__Paracoccaceae	g__Paracoccus	12618	9476	9434	20960	13068	11458	15002	14288	12184	13890	11852	14264	13414	17284	13214	13622	13432	15250	7834	6164	6360	11698	10112	9266	8946	8908	9792	6646	9676	10222	12566	10278	11286	13302	14336	11498	423600	0.0138266	10509.3	0.0210757	14493.3	0.0212943	14024.7
d__Bacteria	k__unclassified_d__Bacteria	p__Pseudomonadota	c__Betaproteobacteria	o__Burkholderiales	f__Comamonadaceae	g__Polaromonas	26232	16128	17824	15290	10696	8656	7698	7220	6544	11278	10152	10528	11052	12408	8894	13208	13682	10916	3718	3226	3868	3886	6092	5084	6522	6058	6090	8264	7734	9276	8248	8192	7940	8374	7664	7560	336202	0.0109738	20061.3	0.0402316	9350.67	0.0137385	11346.4
d__Bacteria	k__unclassified_d__Bacteria	p__Pseudomonadota	c__Alphaproteobacteria	o__Hyphomicrobiales	f__Rhizobiaceae	g__Sinorhizobium	4828	3946	4056	9416	6754	6444	5032	4444	5268	14530	11944	13404	13714	17182	11660	14342	14250	13782	3668	3178	4312	3976	6142	4640	5792	5728	5986	4422	5480	6484	6250	5810	5874	6560	7002	6054	272354	0.00888981	4276.67	0.00857655	6226.33	0.00914804	13867.6
d__Bacteria	k__unclassified_d__Bacteria	p__Pseudomonadota	c__Alphaproteobacteria	o__Sphingomonadales	f__Sphingomonadaceae	g__Sphingobium	4782	3104	4856	7576	5732	5376	4176	3422	4858	9932	9164	10670	10630	12364	8738	10346	10308	10146	2916	2452	3030	3204	4302	3380	7378	7964	8184	5584	6602	7488	5344	4982	5030	5268	5604	5226	230118	0.0075112	4247.33	0.00851772	5190	0.0076254	10255.3
d__Bacteria	k__unclassified_d__Bacteria	p__Actinomycetota	c__Actinomycetes	o__Micrococcales	f__Intrasporangiaceae	g__Janibacter	2250	2036	1690	3364	2536	2582	2506	1476	2516	2266	1782	2470	2448	2442	2740	2174	2136	2408	3478	3562	5182	6826	2794	2052	6712	7112	7556	5294	7382	8210	16212	14024	14022	16856	18348	13260	200704	0.00655111	1992	0.00399481	2496.67	0.00366823	2318.44
d__Bacteria	k__unclassified_d__Bacteria	p__Pseudomonadota	c__Betaproteobacteria	o__Burkholderiales	f__Burkholderiaceae	g__Ralstonia	9272	5710	6564	11890	7758	6434	4162	3388	4154	6856	6450	7520	7546	8438	7156	8096	8702	7416	2934	2560	3414	2230	2472	2020	3148	3138	3196	2176	2612	3224	4344	4250	4102	4758	3986	4048	186124	0.00607521	7182	0.014403	6297.67	0.00925284	7575.56
d__Bacteria	k__unclassified_d__Bacteria	p__Pseudomonadota	c__Gammaproteobacteria	o__Alteromonadales	f__Pseudoalteromonadaceae	g__Pseudoalteromonas	4214	3274	3210	4248	3536	3570	3542	4828	3430	4548	4202	5764	5370	6640	5288	4426	4710	4876	4462	3592	4500	4924	5026	5100	8176	7712	7588	6576	7514	8518	4366	4300	4248	3972	3842	4110	178202	0.00581663	3566	0.00715136	3859	0.00566983	5091.56
d__Bacteria	k__unclassified_d__Bacteria	p__Actinomycetota	c__Actinomycetes	o__Mycobacteriales	f__Corynebacteriaceae	g__Corynebacterium	4122	2632	2980	3240	2638	2246	1906	1334	1864	2524	2144	2892	2822	2806	2822	2744	2832	2724	2252	2188	3176	4632	2436	2252	3556	3740	4094	3246	4070	4946	7922	7192	7230	8062	9010	7122	134398	0.00438684	3244.67	0.00650695	2204.67	0.00323921	2701.11
d__Bacteria	k__unclassified_d__Bacteria	p__Pseudomonadota	c__Betaproteobacteria	o__Burkholderiales	f__Alcaligenaceae	g__Achromobacter	6926	4388	5118	8572	5484	4860	3904	3704	2642	3784	3404	3494	3874	4358	3092	3592	3768	3340	1552	1172	1578	1712	2080	1952	2592	2164	2302	1866	2290	2570	3584	3244	3192	3626	3306	3318	122404	0.00399534	5477.33	0.0109844	4861	0.00714202	3634
d__Bacteria	k__unclassified_d__Bacteria	p__Pseudomonadota	c__Gammaproteobacteria	o__Aeromonadales	f__Aeromonadaceae	g__Aeromonas	3108	2824	2370	4434	3136	2740	3140	3650	2622	2370	2118	2824	2616	2948	2592	2418	2766	2438	2606	2192	2666	3296	2598	2482	4496	4248	4560	3798	4498	4956	4574	4326	4310	4324	4440	4330	119814	0.00391081	2767.33	0.00554969	3287	0.00482942	2565.56
d__Bacteria	k__unclassified_d__Bacteria	p__Pseudomonadota	c__Alphaproteobacteria	o__Hyphomicrobiales	f__Rhizobiaceae	g__Agrobacterium	2288	1620	2116	3804	2866	8806	2622	2200	2626	4382	3782	4312	4298	5296	3660	4288	4436	4236	1932	1554	1890	2372	2538	2118	2454	2418	2656	1932	2808	2950	2758	2472	2438	2984	3068	2502	111482	0.00363884	2008	0.0040269	3820.67	0.00561351	4298.89
d__Archaea	k__unclassified_d__Archaea	p__Euryarchaeota	c__Halobacteria	o__Haloferacales	f__Haloferacaceae	g__Haloferax	2406	1666	1830	3628	2946	2208	1744	1218	1926	3412	2864	3894	3740	3770	4234	3738	4036	3592	2736	2462	3278	3374	2126	2232	4272	4046	3812	3238	3462	4548	2988	3006	2664	2836	3018	2952	109902	0.00358727	1967.33	0.00394535	2278.33	0.00334744	3697.78
d__Bacteria	k__unclassified_d__Bacteria	p__Bacillota	c__Bacilli	o__Bacillales	f__Staphylococcaceae	g__Staphylococcus	3048	2838	2748	3388	2770	2398	2592	2778	2538	2958	2666	2906	2804	3086	2818	2868	3072	2918	2580	2074	2168	2460	2732	2620	2512	2354	2424	2468	2590	2896	3082	3044	3150	3298	5048	3502	102196	0.00333574	2878	0.00577162	2744	0.00403162	2899.56
d__Bacteria	k__unclassified_d__Bacteria	p__Pseudomonadota	c__Betaproteobacteria	o__Burkholderiales	f__Comamonadaceae	g__Acidovorax	5790	4106	4148	5072	3448	3124	2614	2932	2018	2746	2314	2694	2702	3152	2238	2800	2784	2774	1202	1142	1396	1898	1448	1270	2178	2242	2288	2240	2386	2742	3758	3622	3596	3974	3826	3212	101876	0.0033253	4681.33	0.00938808	3201.33	0.00470356	2689.33
d__Bacteria	k__unclassified_d__Bacteria	p__Pseudomonadota	c__Alphaproteobacteria	o__Hyphomicrobiales	f__Phyllobacteriaceae	g__Aquamicrobium	3074	1716	2204	3930	2582	2240	2620	2342	2306	4614	3776	4066	4272	5658	3302	4244	4462	4372	1550	1102	1416	1570	3760	1628	2058	1958	2228	1458	1938	2086	2516	2132	2206	2738	2904	2312	99340	0.00324252	2331.33	0.00467532	2670	0.0039229	4307.33
d__Bacteria	k__unclassified_d__Bacteria	p__Pseudomonadota	c__Gammaproteobacteria	o__Thiotrichales	f__Piscirickettsiaceae	g__Cycloclasticus	2638	1922	2032	2422	1988	1934	1850	2260	1706	2368	2164	2726	2534	2870	2520	2382	2678	2600	2326	2148	2484	2712	3756	3532	4896	5020	5274	3208	3906	4180	2466	2600	2486	2140	1876	2502	99106	0.00323488	2197.33	0.00440659	2026.67	0.00297768	2538
d__Bacteria	k__unclassified_d__Bacteria	p__Pseudomonadota	c__Betaproteobacteria	o__Burkholderiales	f__Comamonadaceae	g__Comamonas	4206	2636	3026	3948	2732	2520	2260	2120	1728	2242	1972	2134	2126	2658	1864	2484	2416	2204	918	764	1092	1298	1256	1152	1716	1424	1448	2138	1758	2108	2458	2436	2330	2504	2406	2346	76828	0.00250771	3289.33	0.00659652	2551.33	0.00374854	2233.33
d__Bacteria	k__unclassified_d__Bacteria	p__Pseudomonadota	c__Gammaproteobacteria	o__Oceanospirillales	f__Oceanospirillaceae	g__Neptunomonas	1710	1340	1318	1230	1118	1004	1242	1610	1108	1408	1280	1772	1606	1956	1424	1330	1374	1690	1872	1606	1930	2622	2010	1996	4194	4068	4300	2922	3240	3896	1858	1820	1752	1502	1354	1770	70232	0.00229242	1456	0.0029199	1218.67	0.00179053	1537.78
d__Bacteria	k__unclassified_d__Bacteria	p__Bacillota	c__Bacilli	o__Bacillales	f__Bacillaceae	g__Geobacillus	1320	896	970	1404	1152	892	1018	996	930	1098	1052	1218	1266	1242	1350	1378	1566	1314	938	852	986	1104	818	752	1896	1590	1640	1660	1388	2084	1102	1076	1060	1294	1246	1100	43648	0.0014247	1062	0.00212976	1065.33	0.00156524	1276
d__Bacteria	k__unclassified_d__Bacteria	p__Actinomycetota	c__Actinomycetes	o__Micrococcales	f__Micrococcaceae	g__Micrococcus	720	388	484	950	720	584	558	266	508	648	552	706	758	758	646	804	852	740	562	602	1000	1220	596	556	946	1068	1300	778	1172	1242	2970	2570	2620	2804	3186	2290	39124	0.00127703	530.667	0.00106421	597.667	0.000878121	718.222
d__Bacteria	k__unclassified_d__Bacteria	p__Pseudomonadota	c__Gammaproteobacteria	o__Enterobacterales	f__Enterobacteriaceae	g__Enterobacter	848	698	656	1232	962	872	852	1082	884	1058	956	1044	1078	1234	1026	1060	1132	1052	922	708	850	1042	922	1072	1356	1190	1416	1218	1448	1698	1040	878	964	942	1252	852	37496	0.00122389	734	0.00147198	980.667	0.00144084	1071.11
d__Bacteria	k__unclassified_d__Bacteria	p__Pseudomonadota	c__Betaproteobacteria	o__Burkholderiales	f__Alcaligenaceae	g__Pusillimonas	1580	1052	1336	1626	1094	1014	942	1476	986	1456	1326	1336	1618	1622	1132	1586	1712	1552	460	354	370	542	674	548	844	844	914	600	782	946	888	836	728	872	740	862	37250	0.00121586	1322.67	0.00265251	1189.67	0.00174792	1482.22
d__Bacteria	k__unclassified_d__Bacteria	p__Actinomycetota	c__Actinomycetes	o__Micrococcales	f__Microbacteriaceae	g__Clavibacter	478	302	322	702	468	444	386	222	340	536	456	564	402	488	450	502	470	590	496	504	718	986	406	284	886	892	1008	726	894	1130	2222	1942	2026	2388	2400	1974	30004	0.00097935	367.333	0.000736661	427	0.000627369	495.333
d__Archaea	k__unclassified_d__Archaea	p__Euryarchaeota	c__Halobacteria	o__Haloferacales	f__Haloferacaceae	g__Halorubrum	734	516	620	844	770	562	642	598	584	802	678	794	750	718	816	846	968	796	482	430	636	502	448	394	864	784	806	852	810	1154	748	642	634	750	776	662	25412	0.000829464	623.333	0.00125005	666.667	0.0009795	796.444
d__Bacteria	k__unclassified_d__Bacteria	p__Actinomycetota	c__Actinomycetes	o__Actinopolysporales	f__Actinopolysporaceae	g__Actinopolyspora	322	442	256	542	506	374	288	292	282	568	462	422	466	484	356	438	430	422	502	474	646	904	482	356	742	874	850	660	878	1036	1674	1174	1326	1558	1730	1254	24472	0.000798782	340	0.000681846	380.667	0.000559294	449.778
d__Bacteria	k__unclassified_d__Bacteria	p__Pseudomonadota	c__Alphaproteobacteria	o__Hyphomicrobiales	f__Brucellaceae	g__Ochrobactrum	256	286	256	778	594	542	532	390	534	1104	924	1036	1044	1340	978	976	930	958	242	196	272	232	488	264	314	308	332	238	316	418	426	382	390	538	436	404	19654	0.000641519	266	0.000533444	561.667	0.000825228	1032.22
d__Bacteria	k__unclassified_d__Bacteria	p__Pseudomonadota	c__Gammaproteobacteria	o__Moraxellales	f__Moraxellaceae	g__Moraxella	294	214	272	358	306	316	300	442	316	514	372	590	606	542	638	418	480	516	634	436	510	180	392	360	786	766	808	608	596	848	476	482	554	432	762	500	17624	0.000575259	260	0.000521411	339.667	0.000499055	519.556
d__Archaea	k__unclassified_d__Archaea	p__Euryarchaeota	c__Halobacteria	o__Halobacteriales	f__Halococcaceae	g__Halococcus	536	332	452	428	406	362	290	186	302	482	388	504	438	490	614	434	492	432	354	272	408	408	286	256	652	516	544	658	534	764	440	400	422	478	354	490	15804	0.000515853	440	0.000882388	329	0.000483383	474.889
d__Archaea	k__unclassified_d__Archaea	p__Euryarchaeota	c__Halobacteria	o__Halobacteriales	f__Haloarculaceae	g__Haloarcula	194	228	226	382	352	298	276	296	262	360	310	352	340	322	390	404	464	320	168	138	202	194	138	92	208	170	146	132	162	244	166	140	122	172	162	148	8680	0.000283321	216	0.000433172	311	0.000456937	362.444
d__Archaea	k__unclassified_d__Archaea	p__Euryarchaeota	c__Halobacteria	o__Halobacteriales	f__Halobacteriaceae	g__Halobacterium	228	114	150	436	318	252	258	144	184	306	228	276	294	316	316	332	318	300	130	116	194	134	168	112	232	258	258	218	222	272	200	162	226	268	212	254	8406	0.000274377	164	0.00032889	265.333	0.000389841	298.444
d__Bacteria	k__unclassified_d__Bacteria	p__Pseudomonadota	c__Betaproteobacteria	o__Burkholderiales	f__Alcaligenaceae	g__Alcaligenes	300	180	234	318	290	282	252	440	216	306	254	288	298	312	228	286	282	204	78	88	110	176	108	136	298	326	344	178	184	204	162	162	198	166	172	200	8260	0.000269612	238	0.000477292	299.667	0.000440285	273.111
d__Bacteria	k__unclassified_d__Bacteria	p__Pseudomonadota	c__Gammaproteobacteria	o__Pasteurellales	f__Pasteurellaceae	g__Pasteurella	120	86	134	166	148	72	142	162	66	136	112	78	96	72	102	106	124	120	126	160	114	100	160	182	172	220	182	122	178	180	114	128	146	166	200	96	4788	0.000156283	113.333	0.000227282	126	0.000185125	105.111
						sum	568436	434468	493036	895624	612600	633146	680868	488586	772894	872064	748878	902954	873714	1040510	829718	901586	913032	1004172	382918	347682	479488	547540	406660	349666	682742	679350	717610	573474	686272	801278	1316022	1162854	1358964	1645200	3299054	1533598	30636658		498647		680620		898514
						Total abundance																																					746975326		1.52446e+07		2.19434e+07		1.99984e+07
																																											0.0410143		0.0327098		0.0310171		0.0449293
[truncated: 7 more columns]
