# Supplementary material for: Divergent microbial community and functional dynamics in mangrove sediments along a polycyclic aromatic hydrocarbons (PAHs) gradient in China
Source: Research Square preprint supplement (doi:10.21203/rs.3.rs-7178259/v1), 2025-09-17
Supplement: Supplementary file 9 [file 7a1e6e0a85fdf37a4493826f.xlsx]

## Sheet: 多样性指数
#sample	CPT_LW_1	CPT_LW_2	CPT_LW_3	CPT_MZ_1	CPT_MZ_2	CPT_MZ_3	CPT_SW_1	CPT_SW_2	CPT_SW_3	DY_1	DY_1_S	DY_2	DY_2_S	DY_3	DY_3_S	FG_SC_1	FG_SC_2	FG_SC_3	FG_WR_1	FG_WR_2	FG_WR_3	M1_1_1	M1_1_2	M1_1_3	M1_2_1	M1_2_2	M1_2_3	M1_3_1	M1_3_2	M1_3_3	M2_1_1	M2_1_2	M2_1_3	M2_2_1	M2_2_2	M2_2_3	M2_3_1	M2_3_2	M2_3_3	M3_1_1	M3_1_2	M3_1_3	M3_2_1	M3_2_2	M3_2_3	M3_3_1	M3_3_2	M3_3_3	M3_4_1
sobs	3532	3235	3471	3751	1974	2292	2505	2406	2707	3321	4084	3369	4030	3554	4629	4247	4687	4467	3367	2996	3616	3406	3209	3424	2697	3787	4047	2172	3282	3541	2825	2896	2892	2434	2451	2312	2650	2513	2684	2812	3007	3072	3108	2238	3046	2433	2401	2431	2623
ace	3696.8	3384.61	3652.07	3904.96	2014.69	2305.58	2505	2411.98	2745.84	3372.23	4226.54	3400.36	4080.21	3695.06	4846.83	4489.27	4877	4632.34	3522.74	3106.33	3619.68	3620.16	3401.66	3721.81	2795.38	4140.43	4382.67	2292.6	3533.29	3799.98	3158.87	3183.12	3249.42	2641.79	2630.59	2469.07	2771.22	2777.12	2841.77	3024.11	3345.77	3416.2	3471.94	2350.68	3343.62	2608.26	2549.64	2600.51	2858.72
ace_lci	3665.69	3355.01	3618.92	3875.53	2001.62	2299.39	2505	2408.51	2733.39	3357.68	4198.85	3389.83	4065.95	3667.06	4810.93	4450.11	4844.29	4602.2	3492.74	3082.26	3617.23	3582.7	3366.54	3674.97	2772.59	4088.27	4333.09	2265.68	3491.21	3757.62	3106.03	3136.02	3194.1	2602.87	2595.56	2436.81	2744.89	2731.39	2810.27	2985.73	3292.91	3363.17	3417.01	2325.29	3295.84	2573.95	2519.15	2567.11	2817.1
ace_hci	3735.16	3421.52	3692.66	3941.35	2033.95	2316.99	2505	2420.25	2764.16	3392.56	4260.92	3416.22	4100.12	3729.98	4889.8	4535.98	4916.52	4669.2	3559.88	3137.12	3626.98	3665.56	3444.61	3777.38	2825.05	4201.63	4440.84	2327.26	3583.83	3850.64	3221.65	3239.48	3314.86	2689.69	2674.09	2509.67	2804.85	2832.43	2881.14	3070.97	3408.39	3478.88	3536.64	2383.45	3400.53	2650.91	2588	2642.12	2909.26
chao	3583.84	3286.06	3528.78	3793.05	1988	2295.59	2505	2406.91	2715.13	3338.24	4126.2	3381.24	4037.5	3603.45	4706.64	4352.75	4742.97	4517.11	3424.93	3032.2	3616.05	3521.88	3296.44	3575.14	2760.69	4003.19	4262.62	2255.02	3417.7	3687.49	3021.83	3034.69	3102.32	2552.7	2550.91	2412.7	2727.47	2696.7	2792.2	2914.75	3208.79	3250.78	3303.87	2277.49	3200.56	2519.36	2462.36	2505.13	2750.05
chao_lci	3568.46	3270.59	3512.27	3779.9	1981.36	2293.2	2505	2406.15	2710.77	3330.78	4112.99	3375.31	4033.49	3588.44	4687	4327.95	4727.34	4502.42	3408.15	3020	3616	3493.98	3273.69	3542.31	2741.24	3960.5	4220.33	2230.91	3386.63	3654.98	2980.47	3003.26	3059.09	2522.84	2524.53	2385.52	2705.13	2655.35	2763.95	2888.8	3166.87	3213.13	3263.83	2264.15	3166.63	2495.95	2444.21	2484.33	2719.51
chao_hci	3605.7	3308.27	3551.89	3812.19	2000.63	2302.8	2505.11	2411.39	2724.5	3351.39	4145.43	3392.75	4046.1	3625	4732.92	4385.16	4764.66	4537.88	3448.57	3050.62	3617.55	3558.62	3327.2	3617.09	2788.71	4056.38	4315.22	2289	3457.99	3729.26	3074.18	3075.33	3156.73	2592.6	2586.75	2449.94	2758.85	2750.06	2830.42	2949.47	3261.71	3298.47	3354.19	2297.64	3244.03	2551.49	2488.13	2534.03	2790.24
shannon	7.37317	7.30682	7.27984	7.38818	6.53247	7.06718	6.93824	7.07838	7.13501	7.41782	7.57099	7.46113	7.52025	7.39773	7.7124	7.62808	7.63506	7.63495	7.16328	6.67539	7.40197	7.33851	7.19693	7.19701	7.00299	7.45571	7.56968	6.28424	7.21157	7.33762	6.77792	6.84132	6.85639	6.68701	6.73615	6.69238	6.94896	6.15543	6.84873	6.89965	6.8815	6.89248	6.80482	5.99382	6.8304	6.51133	6.31256	6.32093	6.54181
shannon_lci	7.36007	7.294	7.26597	7.37428	6.51657	7.05479	6.92333	7.06541	7.12172	7.40483	7.55755	7.44806	7.50627	7.38431	7.6991	7.61478	7.62035	7.62028	7.14801	6.65547	7.38789	7.32503	7.18258	7.18235	6.9884	7.44235	7.55668	6.26416	7.1973	7.3236	6.76175	6.82546	6.84096	6.67119	6.72066	6.67709	6.93416	6.13071	6.83225	6.88388	6.86501	6.87596	6.78728	5.97115	6.81304	6.49334	6.29209	6.30017	6.52297
shannon_hci	7.38626	7.31963	7.29371	7.40207	6.54838	7.07958	6.95314	7.09134	7.14831	7.43081	7.58443	7.47421	7.53422	7.41115	7.72571	7.64137	7.64978	7.64961	7.17856	6.69531	7.41605	7.35199	7.21129	7.21168	7.01758	7.46908	7.58269	6.30431	7.22584	7.35164	6.79408	6.85719	6.87181	6.70282	6.75164	6.70766	6.96376	6.18015	6.86521	6.91542	6.89799	6.909	6.82237	6.01649	6.84776	6.52932	6.33303	6.34169	6.56064
simpson	0.001215	0.001268	0.001443	0.001383	0.004084	0.00166	0.002903	0.001704	0.00171	0.001307	0.001219	0.001327	0.001257	0.001355	0.001033	0.001217	0.001381	0.001835	0.002022	0.007738	0.001528	0.001407	0.001803	0.001768	0.002113	0.001238	0.001079	0.009724	0.001763	0.001532	0.002928	0.002647	0.002409	0.003168	0.002875	0.002915	0.002248	0.028658	0.003514	0.002749	0.003024	0.002945	0.003532	0.016512	0.003683	0.005257	0.009991	0.01075	0.006259
simpson_lci	0.001183	0.001234	0.001402	0.001336	0.003939	0.001609	0.00276	0.001655	0.001654	0.00126	0.001168	0.001274	0.001215	0.001305	0.000989	0.001156	0.001319	0.001716	0.001952	0.007346	0.001463	0.001362	0.001742	0.001712	0.002051	0.001199	0.001044	0.009321	0.0017	0.001479	0.002843	0.002572	0.002346	0.003075	0.002796	0.002836	0.002184	0.027398	0.003366	0.002654	0.002916	0.002843	0.003416	0.015878	0.003538	0.005061	0.009578	0.010284	0.005991
simpson_hci	0.001248	0.001302	0.001484	0.001431	0.004229	0.001711	0.003046	0.001753	0.001766	0.001353	0.001271	0.001379	0.001298	0.001404	0.001078	0.001278	0.001443	0.001954	0.002091	0.00813	0.001594	0.001452	0.001863	0.001824	0.002174	0.001277	0.001115	0.010126	0.001827	0.001585	0.003014	0.002721	0.002471	0.003261	0.002953	0.002993	0.002311	0.029919	0.003661	0.002845	0.003131	0.003047	0.003648	0.017145	0.003828	0.005453	0.010404	0.011217	0.006527
shannoneven	0.902511	0.904109	0.892992	0.897737	0.860916	0.913406	0.886557	0.909148	0.902755	0.914874	0.91054	0.918591	0.905888	0.904829	0.913782	0.913108	0.903286	0.908438	0.881985	0.833899	0.903437	0.90228	0.891403	0.88431	0.886466	0.904893	0.91138	0.817897	0.890734	0.89788	0.852969	0.858268	0.860306	0.857606	0.863138	0.863993	0.881589	0.786211	0.86747	0.868793	0.859253	0.858332	0.846188	0.777073	0.851503	0.83512	0.811004	0.810785	0.831014
simpsoneven	0.232976	0.243786	0.199612	0.192709	0.124038	0.262881	0.137517	0.243897	0.216065	0.230464	0.200823	0.223723	0.197456	0.207719	0.209028	0.193477	0.154514	0.122014	0.146911	0.043135	0.18095	0.208668	0.172877	0.165187	0.175507	0.213238	0.228959	0.047349	0.172801	0.184354	0.120878	0.130476	0.143564	0.129687	0.141927	0.148402	0.167887	0.013885	0.10604	0.129345	0.109984	0.110537	0.091091	0.027061	0.089134	0.078182	0.041687	0.038264	0.060914
coverage	0.990547	0.991428	0.989872	0.990694	0.997006	0.99865	1	0.999325	0.997094	0.995714	0.990811	0.996829	0.996037	0.991163	0.986554	0.985967	0.987963	0.989373	0.990606	0.992719	0.999677	0.98811	0.989431	0.985175	0.99313	0.982709	0.982327	0.992778	0.986936	0.985997	0.985204	0.986613	0.984529	0.989901	0.990752	0.991457	0.992338	0.98767	0.990723	0.989314	0.984822	0.984793	0.983883	0.993541	0.98585	0.990929	0.991927	0.991252	0.98858
invsimpson	822.873	788.647	692.852	722.853	244.851	602.523	344.481	586.816	584.888	765.37	820.162	753.724	795.747	738.235	967.589	821.696	724.209	545.038	494.649	129.233	654.317	710.722	554.764	565.601	473.343	807.532	926.599	102.841	567.132	652.796	341.482	377.858	415.186	315.658	347.863	343.105	444.902	34.8939	284.61	363.719	330.721	339.571	283.112	60.5634	271.503	190.216	100.089	93.0206	159.777
invsimpson_lci	801.464	768.298	673.775	699.038	236.477	584.566	328.35	570.516	566.275	739.009	786.817	725.091	770.469	712.132	927.666	782.282	693.07	511.853	478.139	122.996	627.357	688.656	536.666	548.2	459.884	782.795	897.093	98.7531	547.411	630.977	331.751	367.477	404.707	306.652	338.593	334.142	432.736	33.4241	273.118	351.533	319.347	328.211	274.091	58.3265	261.201	183.373	96.1177	89.15	153.212
invsimpson_hci	845.457	810.103	713.04	748.347	253.841	621.619	362.279	604.074	604.766	793.682	856.459	784.711	822.741	766.324	1011.1	865.292	758.278	582.825	512.34	136.137	683.697	734.249	574.124	584.144	487.613	833.884	958.112	107.283	588.328	676.178	351.8	388.842	426.222	325.208	357.655	352.562	457.771	36.4989	297.112	376.78	342.935	351.745	292.748	62.9788	282.65	197.59	104.403	97.2426	166.931
pd	527.981	468.288	528.055	583.436	291.548	298.23	394.441	312.86	401.018	444.69	619.859	442.087	651.432	517.486	709.466	627.617	743.571	693.686	570.875	507.658	591.741	475.923	456.91	498.249	339.061	534.67	522.416	277.117	442.691	479.312	418.009	446.205	436.948	374.979	360.621	355.024	360.975	355.693	365.172	448.601	456.115	465.106	463.689	361.965	454.593	367.107	376.906	378.068	400.222
Pielou_e	0.902511	0.904109	0.892992	0.897737	0.860916	0.913406	0.886557	0.909148	0.902755	0.914874	0.91054	0.918591	0.905888	0.904829	0.913782	0.913108	0.903286	0.908438	0.881985	0.833899	0.903437	0.90228	0.891403	0.88431	0.886466	0.904893	0.91138	0.817897	0.890734	0.89788	0.852969	0.858268	0.860306	0.857606	0.863138	0.863993	0.881589	0.786211	0.86747	0.868793	0.859253	0.858332	0.846188	0.777073	0.851503	0.83512	0.811004	0.810785	0.831014
Pielou_e_lci	0.900907	0.902524	0.89129	0.896048	0.858821	0.911803	0.884652	0.907483	0.901073	0.913272	0.908924	0.91698	0.904204	0.903188	0.912205	0.911517	0.901544	0.906694	0.880104	0.83141	0.901718	0.900623	0.889625	0.882508	0.884619	0.903271	0.909815	0.815284	0.888972	0.896163	0.850935	0.856277	0.858371	0.855578	0.861153	0.86202	0.879711	0.783053	0.865382	0.866807	0.857194	0.856274	0.844006	0.774133	0.849339	0.832813	0.808374	0.808122	0.828621
Pielou_e_hci	0.904114	0.905695	0.894693	0.899426	0.863012	0.915008	0.888462	0.910814	0.904438	0.916476	0.912157	0.920201	0.907571	0.906471	0.915358	0.9147	0.905027	0.910183	0.883866	0.836388	0.905155	0.903937	0.893181	0.886112	0.888313	0.906515	0.912946	0.820511	0.892497	0.899596	0.855003	0.860258	0.862242	0.859635	0.865123	0.865966	0.883467	0.789369	0.869557	0.870778	0.861312	0.86039	0.84837	0.780012	0.853666	0.837427	0.813634	0.813449	0.833407
[truncated: 8 more columns]
