# Supplementary material for: Divergent microbial community and functional dynamics in mangrove sediments along a polycyclic aromatic hydrocarbons (PAHs) gradient in China
Source: Research Square preprint supplement (doi:10.21203/rs.3.rs-7178259/v1), 2025-09-17
Supplement: Supplementary file 10 [file 7e45b156eebc702b1f20b3cb.xlsx]

## Sheet: MAGs abundance
MAG	Completeness	GTDB_annotation	CPT_LW_1	CPT_LW_2	CPT_LW_3	CPT_MZ_1	CPT_MZ_2	CPT_MZ_3	CPT_SW_1	CPT_SW_2	CPT_SW_3	DY_1	DY_2	DY_3	FG_SC_1	FG_SC_2	FG_SC_3	FG_WR_1	FG_WR_2	FG_WR_3	M1_1_1	M1_1_2	M1_1_3	M1_2_1	M1_2_2	M1_2_3	M2_1_1	M2_1_2	M2_1_3	M2_2_1	M2_2_2	M2_2_3	M3_1_1	M3_1_2	M3_1_3	M3_2_1	M3_2_2	M3_2_3	total	CPT	DY	FG	M1	M2	M3
MAG1	0.9369	d__Bacteria;p__Actinomycetota;c__Acidimicrobiia;o__UBA5794;f__ZC4RG35;g__SZUA-217;s__Unclassified	0.718877	0.872548	1.08425	1.26715	0.936992	1.35891	0.563605	0.535291	0.587851	0	0	0	0.0719591	0.130353	0	0.144881	0	0.420279	0.682883	0.331373	0.328954	0.182728	6.41226	1.74378	0.160164	0.228379	0.214243	0.0772961	0.084476	0.0916397	0.0958429	0.109761	0.0987181	0.149586	0.189863	0.15196	20.0269	0.880608	0	0.127912	1.61366	0.1427	0.132622
MAG10	0.5958	d__Bacteria;p__Bacillota_A;c__Clostridia;o__DUPQ01;f__DUPQ01;g__JAFGQE01;s__Unclassified	0	0	0	0	0	0	0	0	0	0	0	0	0	0	0	0	0	0	0	0	0	0	0	0	0.0597668	0	0	1.20808	0.189606	0.303738	0	0	0	0	0	0	1.76119	0	0	0	0	0.293531	0
MAG100	0.7982	d__Bacteria;p__Acidobacteriota;c__Vicinamibacteria;o__Vicinamibacterales;f__Unclassified;g__Unclassified;s__Unclassified	0	0	0	0	0	0	0	0.0834219	0	3.06244	1.81867	2.45381	0.0479238	0	0.093226	0	0	0	0	0	0	0	0	0	0	0	0	0	0	0	0	0	0	0	0	0	7.5595	0.0092691	2.44498	0.023525	0	0	0
MAG101	0.9286	d__Bacteria;p__Bacteroidota;c__Bacteroidia;o__Bacteroidales;f__VadinHA17;g__JAADHC01;s__Unclassified	0	0	0	0	0	0	0	0	0	0	0	0	0	0	0	0	0	0	0	0	0	0	0	0	0.0841854	0	0	2.13677	0.213364	0.264345	0	0	0	0	0	0	2.69867	0	0	0	0	0.449778	0
MAG102	0.7308	d__Bacteria;p__Bacteroidota;c__Bacteroidia;o__Bacteroidales;f__Prolixibacteraceae;g__Draconibacterium;s__Unclassified	0	0	0	0	0	0	0	0	0	0	0	0	0	0	0	0	0	0	0	0	0	0	0	0	0.424904	0.720102	0.575011	0.785309	1.72943	0.522303	0	0	0	0	0	0	4.75706	0	0	0	0	0.792843	0
MAG103	0.7643	d__Bacteria;p__Bacteroidota;c__Bacteroidia;o__Bacteroidales;f__GCA-2748055;g__Unclassified;s__Unclassified	0	0	0	0	0	0	0	0	0	0	0	0	0.279634	0.209911	0.217823	1.26313	3.15795	0.656157	0	0	0	0	0	0	0	0	0	0	0	0	0	0	0	0	0	0	5.7846	0	0	0.9641	0	0	0
MAG104	0.5683	d__Bacteria;p__Pseudomonadota;c__Gammaproteobacteria;o__Chromatiales;f__Sedimenticolaceae;g__Sva-25;s__Unclassified	0	0	0	0	0	0	0	0	0	0	0	0	0	0	0	0	0	0	0	0	0	0	0	0	1.10679	1.50332	1.8972	0.162811	0.165093	0.170447	0	0	0	0	0	0	5.00565	0	0	0	0	0.834276	0
MAG105	0.5854	d__Bacteria;p__Actinomycetota;c__Acidimicrobiia;o__UBA5794;f__ZC4RG35;g__SZUA-217;s__Unclassified	1.01864	1.18201	1.28658	1.31424	1.15619	1.07389	1.69914	1.72239	1.68835	0.120572	0.0924031	0.121681	0.722972	0.75855	0.457563	0.238028	0	0.365478	0	0	0	0	0	0	0	0	0	0	0	0	0	0	0	0	0	0	15.0187	1.34905	0.111552	0.423765	0	0	0
MAG106	0.5119	d__Bacteria;p__Pseudomonadota;c__Gammaproteobacteria;o__Steroidobacterales;f__Steroidobacteraceae;g__SG8-30;s__Unclassified	0	0	0	0	0	0	0	0	0	0.66205	0.652703	0.654098	4.99556	4.33493	3.79504	5.09836	3.74054	3.09229	0	0	0	0	0	0	0	0	0	0	0	0	0.224073	0.220864	0.226839	0.234115	0.205614	0.217762	28.3548	0	0.656284	4.17612	0	0	0.221544
MAG107	0.8787	d__Bacteria;p__Desulfobacterota;c__Desulfobacteria;o__Desulfobacterales;f__B30-G6;g__Unclassified;s__Unclassified	0	0	0	0	0	0	0	0	0	0	0	0	0	0	0	0	0	0	0	0	0	0	0.100511	0	0.934201	0.481111	0.515151	1.0433	0.87262	1.42173	0	0	0	0	0	0	5.36863	0	0	0	0.0167518	0.878019	0
MAG108	0.8064	d__Bacteria;p__Pseudomonadota;c__Alphaproteobacteria;o__Rhizobiales;f__Methyloligellaceae;g__Methyloceanibacter;s__Unclassified	0	0	0	0	0.0697859	0	0	0	0	0	0	0	0	0	0	0	0	0	2.0601	1.54876	1.49146	1.40352	2.29996	1.84788	2.15949	2.14124	2.17394	1.49092	1.70233	1.7293	0.224326	0.228629	0.241423	0.166695	0.164568	0.217712	23.362	0.00775399	0	0	1.77528	1.89954	0.207226
MAG109	0.7825	d__Bacteria;p__Chloroflexota;c__Anaerolineae;o__Anaerolineales;f__UBA4823;g__PFL25;s__Unclassified	1.63501	1.40723	1.71983	1.86711	1.84086	2.20129	1.14515	1.37706	1.67754	0	0	0	0.179985	0.154019	0	0.137726	0	0.597374	0	0	0	0	0	0	0	0	0	0	0	0	0	0	0	0	0.0408063	0	15.981	1.65234	0	0.178184	0	0	0.00680105
MAG11	0.5929	d__Bacteria;p__Pseudomonadota;c__Gammaproteobacteria;o__Woeseiales;f__Woeseiaceae;g__UBA1847;s__Unclassified	0	0	0	0	0	0	0	0	0	0	0	0	0	0	0	0	0	0	0	0	0	0	0.138623	0	0.8975	1.20489	1.08609	0.828776	1.08385	0.867688	0	0	0	0	0	0	6.10741	0	0	0	0.0231038	0.994798	0
MAG110	0.5129	d__Bacteria;p__Myxococcota;c__Polyangia;o__GCA-2747355;f__Unclassified;g__Unclassified;s__Unclassified	0	0	0	0	0	0	0	0	0	0	0	0	0	0	0	0	0	0	0	0	0	0	0.104559	0	0.20664	0	0	1.08536	0.530933	0.626287	0	0	0	0	0	0	2.55378	0	0	0	0.0174265	0.408203	0
MAG111	0.6879	d__Bacteria;p__Chloroflexota;c__Anaerolineae;o__Anaerolineales;f__UBA4823;g__PFL25;s__Unclassified	1.18348	1.25897	1.53353	1.67308	1.63051	1.96721	1.04214	1.54389	1.54031	0	0	0	0.173004	0.140403	0	0.121974	0	0.545153	0	0	0	0	0	0	0	0	0	0	0	0	0	0	0	0	0	0	14.3536	1.4859	0	0.163422	0	0	0
MAG112	0.681	d__Bacteria;p__Bacteroidota;c__Bacteroidia;o__Bacteroidales;f__GCA-2748055;g__GCA-2748055;s__Unclassified	0	0	0	0	0	0	0	0	0	0	0	0	0	0	0	0	0	0	0	0	0	0	0	0	1.26366	1.18161	1.16902	1.01446	1.05204	1.25813	0	0	0	0	0	0	6.93893	0	0	0	0	1.15649	0
MAG113	0.9149	d__Bacteria;p__Pseudomonadota;c__Alphaproteobacteria;o__Rhizobiales;f__Rhizobiaceae;g__Salaquimonas;s__Unclassified	0	0	0	0	0	0	0	0	0	0	0	0	0	0	0	0	0	0	0.549733	0.440462	0.380722	0.600649	0.757971	0.4961	0.894527	0.740224	0.765214	0.30922	0.695589	0.500395	0.0622486	0.0639474	0.0638992	0.0675273	0.0829268	0.0886221	7.55998	0	0	0	0.537606	0.650861	0.0715286
MAG114	0.7445	d__Bacteria;p__Chloroflexota;c__Anaerolineae;o__Anaerolineales;f__UBA4823;g__PFL25;s__Unclassified	1.18214	1.26307	1.56084	1.68802	1.6783	1.99504	1.04201	1.27384	1.82669	0	0	0	0.164124	0.134071	0	0.127463	0	0.539958	0	0	0	0	0	0	0	0	0	0	0	0	0	0	0	0	0	0	14.4756	1.50111	0	0.160936	0	0	0
MAG115	0.8014	d__Bacteria;p__Pseudomonadota;c__Gammaproteobacteria;o__UBA9214;f__UBA9214;g__Unclassified;s__Unclassified	0	0	0	0	0	0	0	0	0	0.0457813	0	0	0.138043	0.20054	0.235377	0	0	0	0.876083	0.897554	0.765117	0.323601	0.479532	0.397189	0.503381	0.457808	0.479305	0.115827	0.228252	0.152501	1.13016	1.32635	1.43534	0.628075	0.38969	1.16912	12.3746	0	0.0152604	0.0956599	0.623179	0.322846	1.01312
MAG116	0.8232	d__Bacteria;p__Pseudomonadota;c__Alphaproteobacteria;o__Rhizobiales;f__Rhizobiaceae;g__BOKV01;s__Unclassified	1.68234	1.57961	1.8656	2.16002	2.36965	1.97892	2.36056	2.22256	2.87057	0	0	0	0.486935	0.44056	0.277622	0.0907232	0	0.589885	0	0	0	0	0	0	0	0	0	0	0	0	0	0	0	0	0	0	20.9755	2.12109	0	0.314287	0	0	0
MAG117	0.6934	d__Bacteria;p__Actinomycetota;c__Actinomycetia;o__Nanopelagicales;f__CAIYMF01;g__Unclassified;s__Unclassified	0	0	0	0	0	0	0	0	0	0.148502	5.46832	0.140253	0	0	0	0	0	0	0	0	0	0	0	0	0	0	0	0	0	0	0	0	0	0	0	0	5.75707	0	1.91902	0	0	0	0
MAG118	0.6676	d__Bacteria;p__Pseudomonadota;c__Alphaproteobacteria;o__Rhizobiales;f__Aestuariivirgaceae;g__Anderseniella;s__Unclassified	0.144438	0.134807	0.178796	0.168062	0.219844	0.224319	0.163851	0.174581	0.271185	0.861779	1.06748	0.816084	0.926394	1.15479	1.45019	1.04182	0.825322	0.82938	1.10199	1.18268	1.95645	0.827043	1.19614	0.991868	0.800696	0.566565	0.676177	0.414536	1.01833	0.586043	3.29437	3.1108	3.35474	4.04331	4.18674	3.39208	43.3537	0.186654	0.915115	1.03798	1.20936	0.677058	3.56367
MAG119	0.8786	d__Bacteria;p__Bacteroidota;c__Bacteroidia;o__Flavobacteriales;f__Flavobacteriaceae;g__Lutimonas;s__Unclassified	0	0	0	0	0	0	0	0	0	0	0	0	0	0	0	0	0	0	0	0	0	0	0	0	0	0	0	0	0	0	0.626885	0.553369	0.606048	0.816685	0.66	0.657378	3.92037	0	0	0	0	0	0.653394
MAG12	0.8332	d__Bacteria;p__Actinomycetota;c__Acidimicrobiia;o__UBA5794;f__ZC4RG35;g__Unclassified;s__Unclassified	0	0	0	0	0	0	0.0845827	0.10974	0.103866	2.84458	2.03933	2.92763	0	0	0	0	0	0	0	0	0	0	0	0	0	0	0	0	0	0	0	0	0	0	0	0	8.10974	0.033132	2.60385	0	0	0	0
MAG120	0.9344	d__Bacteria;p__Pseudomonadota;c__Alphaproteobacteria;o__Rhizobiales;f__Methyloligellaceae;g__Methyloceanibacter;s__Unclassified	0	0	0	0	0	0	0	0	0	0	0	0	0	0	0	0	0	0	1.24709	1.26439	1.77003	1.07874	1.16784	1.11265	0.58951	0.560889	0.587499	0.449759	0.726089	0.608859	0.142597	0.151912	0.1484	0.131154	0.139659	0.185981	12.063	0	0	0	1.27346	0.587101	0.14995
MAG121	0.5137	d__Bacteria;p__Chloroflexota;c__Anaerolineae;o__Promineofilales;f__Promineofilaceae;g__UBA11865;s__Unclassified	1.17297	1.31755	1.90738	1.13249	1.13949	1.25623	0.487313	0.501876	0.481271	0	0	0	0.48541	0.648239	0.457522	0.0645021	0	0.167351	0	0	0	0	0	0	0	0	0	0	0	0	0	0	0	0	0	0	11.2196	1.04406	0	0.303838	0	0	0
MAG122	0.6908	d__Bacteria;p__Actinomycetota;c__Actinomycetia;o__Actinomycetales;f__Dermatophilaceae;g__Phycicoccus;s__Unclassified	0	0	0	0	0	0	0	0	0	0	0	0	0	0	0	0	0	0	0	0.0909494	0.0938546	0.183234	0.103131	0	1.00256	1.0143	1.07252	0.422893	0.639356	0.576311	0	0	0	0.0533986	0.0698432	0	5.32236	0	0	0	0.0785281	0.787991	0.0205403
MAG123	0.6475	d__Bacteria;p__Actinomycetota;c__Acidimicrobiia;o__UBA5794;f__ZC4RG35;g__SZUA-217;s__Unclassified	0.878665	1.03354	1.09942	1.1086	0.965302	0.882345	1.4855	1.5162	0.961583	0.129612	0.1035	0.13292	1.13546	0.843466	0.622131	0.258108	0	0.329469	0	0	0	0	0	0	0	0	0	0	0	0	0	0	0	0	0	0	13.4858	1.10346	0.122011	0.531438	0	0	0
MAG124	0.6456	d__Bacteria;p__Chloroflexota;c__Anaerolineae;o__Anaerolineales;f__UBA4823;g__PFL25;s__PFL25 sp020349245	0	0	0	0	0	0	0	0.0815729	0	2.04019	1.61062	1.77963	0.046428	0	0	0	0	0	0	0	0	0	0	0	0	0	0	0	0	0	0	0	0	0	0	0	5.55844	0.00906365	1.81015	0.00773799	0	0	0
MAG125	0.5736	d__Bacteria;p__Pseudomonadota;c__Gammaproteobacteria;o__Woeseiales;f__Woeseiaceae;g__UBA1847;s__Unclassified	0	0	0	0	0	0	0	0	0	0	0	0	0	0	0	0	0	0	0	0	0	0	0.150237	0	0.828621	1.32954	1.0111	0.628583	0.993745	0.785966	0	0	0	0	0	0	5.72779	0	0	0	0.0250394	0.929592	0
MAG126	0.5634	d__Bacteria;p__Pseudomonadota;c__Alphaproteobacteria;o__Rhizobiales;f__Aestuariivirgaceae;g__Anderseniella;s__Unclassified	0.114982	0.113314	0.149338	0.143475	0.187121	0.200529	0.14474	0.148962	0.238339	0.786831	0.996615	0.733681	0.86557	1.05597	1.32733	0.992501	0.773415	0.79104	0.915852	1.00693	1.13584	0.749615	1.00879	0.832182	0.739529	0.859697	0.621333	0.379758	0.927894	0.531958	2.88883	2.67668	2.90214	3.55138	3.67612	2.97377	38.1421	0.160089	0.839043	0.967638	0.941535	0.676695	3.11149
MAG127	0.6301	d__Bacteria;p__Pseudomonadota;c__Gammaproteobacteria;o__Steroidobacterales;f__Steroidobacteraceae;g__Unclassified;s__Unclassified	0	0	0	0	0	0	0	0	0	0.235634	0.207512	0.204864	0.180233	0.351467	0.278934	0.148543	0.138506	0.13521	0	0	0	0	0	0	0.0742287	0.0600692	0.0638642	0.0604243	0.111568	0.103149	1.46783	1.55379	1.49276	1.56898	1.36346	1.65449	11.4555	0	0.216003	0.205482	0	0.0788838	1.51688
MAG128	0.7081	d__Bacteria;p__Bacteroidota;c__Bacteroidia;o__Bacteroidales;f__VadinHA17;g__SR-FBR-E99;s__SR-FBR-E99 sp006227095	0	0	0	0	0	0	0	0	0	0.0971676	0.176092	0.128114	0.361162	0.273728	0.291038	1.19134	2.75193	0.931844	0	0	0	0	0	0	0	0	0	0	0	0	0.0820672	0.0828577	0.0748597	0.0808402	0.0643724	0.0860487	6.67346	0	0.133791	0.96684	0	0	0.0785077
MAG129	0.631	d__Bacteria;p__Pseudomonadota;c__Gammaproteobacteria;o__Woeseiales;f__Woeseiaceae;g__UBA1847;s__Unclassified	0	0	0	0	0	0	0	0	0	0	0	0	0	0	0	0	0	0	0.253059	0.260512	0	0.26401	0.308783	0.26394	0.986847	1.29164	1.1676	0.752023	1.17498	1.04485	0	0	0	0	0	0	7.76825	0	0	0	0.225051	1.06966	0
MAG13	0.8961	d__Bacteria;p__Pseudomonadota;c__Gammaproteobacteria;o__Burkholderiales;f__Burkholderiaceae_B;g__G020354665;s__G020354665 sp020354665	0.0661646	0	0.089638	0.147722	0.224752	0.104165	0.262167	0.347766	0.341721	6.29149	6.26206	5.90137	0.10141	0.0849914	0.129885	0	0	0	0	0	0	0	0	0	0	0	0	0	0	0	0	0	0	0	0	0	20.3553	0.176011	6.15164	0.0527145	0	0	0
MAG130	0.7885	d__Bacteria;p__Planctomycetota;c__Planctomycetia;o__Pirellulales;f__Pirellulaceae;g__JAGQPK01;s__Unclassified	0	0	0	0.0946159	0.103686	0.129884	0.092689	0.0940529	0.117341	0.134544	0.26273	0.122523	2.30372	1.79796	1.49662	0.672055	0.850706	0.613883	0	0	0	0	0	0	0	0	0	0	0	0	0.0998195	0.103779	0.106961	0.110519	0.102706	0.112229	9.52302	0.0702521	0.173266	1.28916	0	0	0.106002
MAG131	0.5255	d__Bacteria;p__Bacteroidota;c__Bacteroidia;o__Flavobacteriales;f__Flavobacteriaceae;g__Robiginitalea;s__Unclassified	0	0	0.0823521	0	0	0.13561	0	0	0.0845406	0.249275	0.197004	0.262271	1.52876	1.19807	1.10346	1.1045	0.917776	0.682256	0	0	0	0	0	0	0	0	0	0	0	0	0.177823	0.183097	0.179593	0.207535	0.192413	0.200385	8.68672	0.0336114	0.236183	1.08914	0	0	0.190141
MAG132	0.8045	d__Bacteria;p__Chloroflexota;c__Anaerolineae;o__Anaerolineales;f__UBA4823;g__DSOS01;s__Unclassified	0.861482	0.975343	1.22253	1.22905	1.33322	1.42964	1.02504	1.13488	0.966023	0	0	0	0.448673	0.393863	0.183631	0.170067	0	0.678877	0	0	0.0992107	0	0	0.138699	0	0	0	0	0	0	0	0	0	0	0	0	12.2902	1.1308	0	0.312519	0.0396515	0	0
MAG133	0.5268	d__Bacteria;p__Pseudomonadota;c__Alphaproteobacteria;o__Rhizobiales;f__Aestuariivirgaceae;g__Anderseniella;s__Unclassified	0.131538	0.131508	0.175885	0.157756	0.20316	0.225686	0.159311	0.16222	0.263037	0.816411	1.0453	0.775927	0.89292	1.10175	1.38885	1.0022	0.779304	0.792531	0.94916	1.05052	1.1562	0.740111	1.06682	0.84795	0.782412	0.559513	0.664079	0.434805	1.22799	0.591689	3.10685	2.91934	3.12791	3.84787	3.95667	3.18896	40.4242	0.1789	0.879214	0.992927	0.968461	0.710082	3.35793
MAG134	0.5191	d__Bacteria;p__Actinomycetota;c__Actinomycetia;o__Mycobacteriales;f__Mycobacteriaceae;g__Mycobacterium;s__Unclassified	2.68202	1.96932	1.64655	1.32252	1.65084	1.12009	1.46677	1.27426	1.57924	0	0	0	0.199505	0.25227	0.17178	0	0	0.23604	0	0	0	0	0	0	0	0	0	0	0	0	0	0	0	0	0	0	15.5712	1.63462	0	0.143266	0	0	0
MAG135	0.7132	d__Bacteria;p__Actinomycetota;c__Thermoleophilia;o__Solirubrobacterales;f__70-9;g__JAJKHV01;s__Unclassified	3.43029	2.92094	1.37957	0	0	0	0.8871	0.414781	0.150735	0	0	0	0	0	0	0	0	0	0	0	0	0	0	0	0	0	0	0	0	0	0	0	0	0	0	0	9.18341	1.02038	0	0	0	0	0
MAG136	0.7179	d__Bacteria;p__Actinomycetota;c__Acidimicrobiia;o__Acidimicrobiales;f__Ilumatobacteraceae;g__Ilumatobacter;s__Unclassified	0	0	0	0	0	0	0	0	0	0.182937	0.493617	0.154989	4.87897	4.48428	5.39653	2.47684	1.78739	1.68973	0	0	0	0	0	0	0	0	0	0	0	0	0.16896	0.154336	0.158704	0.187753	0.188332	0.178789	22.5822	0	0.277181	3.45229	0	0	0.172812
MAG137	0.6282	d__Bacteria;p__Pseudomonadota;c__Gammaproteobacteria;o__Woeseiales;f__Woeseiaceae;g__UBA1847;s__Unclassified	0	0	0	0	0	0	0	0	0	0	0	0	0	0	0	0	0	0	0.833113	0.851826	0.796198	0.856422	0.801431	0.748012	1.15186	1.44329	1.49377	0.797594	1.29985	1.02024	0.147297	0.156356	0.147568	0.124857	0.135559	0.172041	12.9773	0	0	0	0.8145	1.2011	0.14728
MAG138	0.7066	d__Bacteria;p__Pseudomonadota;c__Gammaproteobacteria;o__Arenicellales;f__BMS3Bbin11;g__BMS3Bbin11;s__Unclassified	0	0	0	0	0	0	0	0	0	0	0	0	0	0	0	0	0	0	0.141314	0.171978	0.144908	0.131452	0	0	0.93808	1.58146	1.36761	0.124121	0.203837	0.183812	0	0	0	0	0	0	4.98857	0	0	0	0.0982754	0.733153	0
MAG139	0.8446	d__Bacteria;p__Desulfobacterota;c__Desulfobacteria;o__Desulfobacterales;f__UBA11574;g__UBA11574;s__UBA11574 sp003486165	0	0	0.102784	0.130756	0.100468	0.193072	0.0843664	0.138249	0.120929	1.50694	1.90196	2.80335	0.153359	0.26502	0.294533	0	0	0.324038	0	0	0	0	0	0	0	0	0	0	0	0	0	0	0	0	0	0	8.11983	0.096736	2.07075	0.172825	0	0	0
MAG14	0.5998	d__Bacteria;p__Pseudomonadota;c__Gammaproteobacteria;o__Steroidobacterales;f__Steroidobacteraceae;g__Unclassified;s__Unclassified	0	0	0	0	0	0	0	0	0	0.206996	0.163661	0.179017	0.174636	0.302157	0.240566	0.141654	0.121946	0	0	0	0	0	0	0	0.0665951	0.0481484	0.0554294	0.0528243	0.104298	0.0979633	1.45118	1.77917	1.50392	1.55207	1.32228	1.34703	10.9115	0	0.183225	0.163493	0	0.0708764	1.49261
MAG140	0.7012	d__Bacteria;p__Chloroflexota;c__Anaerolineae;o__Anaerolineales;f__UBA4823;g__PFL25;s__Unclassified	0	0	0	0	0	0	0	0.0914791	0.0692373	2.13626	1.80118	2.47718	0	0	0	0	0	0	0	0	0	0	0	0	0	0	0	0	0	0	0	0	0	0	0	0	6.57533	0.0178574	2.13821	0	0	0	0
MAG141	0.7037	d__Bacteria;p__Actinomycetota;c__Acidimicrobiia;o__UBA5794;f__ZC4RG35;g__Unclassified;s__Unclassified	0	0	0	0	0	0	0.0821305	0.107127	0.100078	3.06518	2.02134	2.50105	0	0	0	0	0	0	0	0	0	0	0	0	0	0	0	0	0	0	0	0	0	0	0	0	7.87691	0.0321484	2.52919	0	0	0	0
MAG142	0.5831	d__Bacteria;p__Pseudomonadota;c__Alphaproteobacteria;o__Rhizobiales;f__Methyloligellaceae;g__Methyloceanibacter;s__Unclassified	4.1059	3.92353	3.78124	4.10782	4.64365	3.15266	5.64189	5.3486	5.30399	0.0891686	0.241877	0.127588	1.07967	0.916094	0.691335	0.184372	0	1.24321	0	0	0	0	0	0	0	0	0	0	0	0	0	0	0	0	0.0592305	0	44.6418	4.44548	0.152878	0.685781	0	0	0.00987175
MAG143	0.5692	d__Archaea;p__Thermoproteota;c__Nitrososphaeria;o__Nitrososphaerales;f__Nitrosopumilaceae;g__JACEMX01;s__Unclassified	1.36557	1.55752	1.75362	2.2991	2.48993	1.7068	1.01427	1.15561	1.09959	0.131537	0	0.195223	0.367394	0.372447	0.341546	0.0824339	0	0.386003	0	0	0	0	0	0	0	0.096191	0.0762151	0	0	0.0672434	0	0	0	0	0	0	16.5583	1.60467	0.10892	0.258304	0	0.0399416	0
MAG144	0.7412	d__Bacteria;p__Actinomycetota;c__Acidimicrobiia;o__Acidimicrobiales;f__Microtrichaceae;g__JAAEPF01;s__Unclassified	0.181448	0.175642	0.237257	0.225644	0.190193	0.324954	0.105161	0.114249	0.117186	0	0	0	0.654086	0.669765	0.758887	0.181864	0.0674927	0.175066	1.60911	2.01556	2.35664	2.52942	1.41377	1.65033	1.4402	1.49021	1.52148	0.670602	1.66808	0.998185	1.54736	1.61776	1.50982	1.33757	1.80963	1.63928	33.0039	0.185748	0	0.41786	1.92914	1.29813	1.5769
MAG145	0.6663	d__Bacteria;p__Actinomycetota;c__Actinomycetia;o__Nanopelagicales;f__GCA-2699445;g__Unclassified;s__Unclassified	0	0	0	0	0	0	0	0	0	0	0	0	0	0	0	0	0	0	0.538489	0.552069	1.41934	1.03582	0.163812	0.174435	0.0472008	0	0	0.0317864	0.0806158	0.0492744	2.59192	2.48343	2.49671	2.78711	2.99316	2.59848	20.0436	0	0	0	0.647328	0.0348129	2.65847
MAG146	0.5036	d__Bacteria;p__Bacteroidota;c__Bacteroidia;o__Flavobacteriales;f__Flavobacteriaceae;g__Lutimonas;s__Unclassified	0	0	0	0	0	0	0	0	0	0	0	0	0	0	0	0	0	0	0	0	0	0	0	0	0.654298	1.07071	1.39738	0.156835	0.133032	0.180211	0	0	0	0	0	0	3.59246	0	0	0	0	0.598744	0
MAG147	0.6008	d__Bacteria;p__Pseudomonadota;c__Gammaproteobacteria;o__Burkholderiales;f__Burkholderiaceae_A;g__JADJWR01;s__Unclassified	0	0	0	0	0	0	0	0	0	0.918184	0.934851	0.842124	5.33114	4.12206	4.96812	0.639158	0.29727	0.392249	0	0	0	0	0	0	0	0	0	0	0	0	0.196539	0.205638	0.187948	0.216489	0.178197	0.190249	19.6202	0	0.898386	2.625	0	0	0.195843
MAG148	0.6348	d__Bacteria;p__Chloroflexota;c__Anaerolineae;o__Anaerolineales;f__UBA4823;g__DSOS01;s__Unclassified	0.751778	0.868459	1.06929	1.05902	0.90929	1.23752	0.953555	1.07686	1.31755	0	0	0	0.366232	0.343169	0.140407	0.146802	0	0.60695	0	0	0	0	0	0	0	0	0	0	0	0	0	0	0	0	0	0	10.8469	1.02704	0	0.26726	0	0	0
MAG149	0.9156	d__Bacteria;p__Bacteroidota;c__Bacteroidia;o__Flavobacteriales;f__Flavobacteriaceae;g__Robiginitalea;s__Unclassified	0	0	0	0	0	0	0	0	0	0	0	0	0	0	0	0	0	0	1.37765	0.8094	0.475943	0.583011	0.557953	0.627001	0.219451	0.124697	0.143035	0.214706	0.368146	0.234366	0	0	0	0	0	0	5.73536	0	0	0	0.738493	0.2174	0
MAG15	0.9746	d__Bacteria;p__Bacteroidota;c__Bacteroidia;o__Bacteroidales;f__VadinHA17;g__LD21;s__Unclassified	0	0	0	0	0	0	0	0	0	0	0	0	0	0	0	0	0	0	0	0	0	0	0	0	0.213304	0	0	3.30524	0.268061	0.676696	0	0	0	0	0	0	4.4633	0	0	0	0	0.743884	0
MAG150	0.8301	d__Bacteria;p__Actinomycetota;c__Acidimicrobiia;o__UBA5794;f__ZC4RG35;g__Unclassified;s__Unclassified	0	0	0	0	0	0	0.0882534	0.111478	0.1023	2.80694	2.70567	2.46857	0	0	0	0	0	0	0	0	0	0	0	0	0	0	0	0	0	0	0	0	0	0	0	0	8.28322	0.033559	2.6604	0	0	0	0
MAG151	0.7716	d__Bacteria;p__Desulfobacterota_F;c__Desulfuromonadia;o__Desulfuromonadales;f__BM103;g__JAFDBW01;s__Unclassified	0.157012	0.120806	0.126393	0.084583	0	0.316136	0.0747148	0.166909	0	0.0787537	0.169284	0.0951157	0.576487	0.911707	0.692438	0.893123	2.70103	0.302093	0	0	0	0	0	0	0	0	0	0	0	0	0.0669869	0.06901	0.0715791	0	0	0.0661095	7.74027	0.116284	0.114384	1.01281	0	0	0.0456142
MAG152	0.9747	d__Bacteria;p__Bacteroidota;c__Bacteroidia;o__Flavobacteriales;f__Flavobacteriaceae;g__Robiginitalea;s__Unclassified	0	0	0	0	0	0	0	0.0848521	0.0721738	10.7544	6.42091	10.5792	0.04454	0	0	0	0	0	0	0	0	0	0	0	0	0	0	0	0	0	0	0	0	0	0	0	27.9561	0.0174473	9.25151	0.00742333	0	0	0
MAG153	0.654	d__Bacteria;p__Pseudomonadota;c__Gammaproteobacteria;o__Chromatiales;f__Sedimenticolaceae;g__Unclassified;s__Unclassified	0	0	0	0	0	0	0	0	0	0	0	0	0	0	0	0	0	0	0	0	0	0.0822408	0	0	1.01446	0.975938	1.0618	0.789901	1.00028	0.987597	0	0	0	0	0	0	5.91222	0	0	0	0.0137068	0.971662	0
MAG154	0.5636	d__Bacteria;p__Desulfobacterota;c__Desulfobulbia;o__Desulfobulbales;f__Desulfocapsaceae;g__JABDQA01;s__Unclassified	0	0	0	0	0	0	0	0	0	0	0	0	0	0	0	0	0	0	1.09578	1.078	0.786868	1.44272	0.483619	2.28033	0.146993	0.189169	0.207468	0.079695	0.129328	0.104448	0	0	0	0	0	0	8.02441	0	0	0	1.19455	0.14285	0
MAG155	0.8269	d__Archaea;p__Thermoproteota;c__Nitrososphaeria;o__Nitrososphaerales;f__Nitrososphaeraceae;g__TH1177;s__Unclassified	1.30585	1.10635	1.11055	1.11482	1.1762	0.895038	0.975111	0.715844	0.851788	0	0	0	0.26536	0.211314	0.128577	0.0642701	0	0.247796	0	0	0	0	0	0	0	0	0	0	0	0	0	0	0	0	0	0	10.1689	1.02795	0	0.152886	0	0	0
MAG156	0.9049	d__Bacteria;p__Actinomycetota;c__Acidimicrobiia;o__UBA5794;f__ZC4RG35;g__Unclassified;s__Unclassified	0.105062	0.114043	0.17358	0.177131	0.0974662	0.30064	0.100211	0.083796	0.071533	0.176926	0.234902	0.150532	1.69053	1.68165	2.22567	0.677452	0.188997	0.603998	0	0	0	0	0	0	0	0	0	0	0	0	0.162571	0.161912	0.152854	0.153216	0.146671	0.164719	9.79605	0.13594	0.187453	1.17805	0	0	0.15699
MAG157	0.8578	d__Bacteria;p__Actinomycetota;c__Actinomycetia;o__Jiangellales;f__Unclassified;g__Unclassified;s__Unclassified	0	0	0	0	0	0	0	0	0	0	0	0	0	0	0	0	0	0	1.36379	1.68948	1.42317	1.87879	1.27302	1.11065	1.16902	1.31903	1.24668	0.808749	1.51637	0.975126	0.124975	0	0	0.129999	0.131258	0	16.1601	0	0	0	1.45648	1.1725	0.064372
MAG158	0.6879	d__Archaea;p__Halobacteriota;c__Methanosarcinia;o__Methanosarcinales;f__Methanosarcinaceae;g__Methanosarcina;s__Unclassified	0	0	0	0.068882	0.0726352	0.109529	0	0	0	0.0961603	0.111874	0.127974	0.270392	0.228719	0.167118	1.8781	1.31324	1.81326	0	0	0	0	0	0	0	0	0	0	0	0	0	0	0	0	0	0	6.25789	0.027894	0.112003	0.94514	0	0	0
MAG159	0.7415	d__Bacteria;p__Actinomycetota;c__Actinomycetia;o__Nanopelagicales;f__CAIYMF01;g__Unclassified;s__Unclassified	0	0	0	0	0	0	0	0	0	0	0	0	0	0	0	0	0	0	0	0	0	0	0	0	0	0	0	0	0	0	4.66768	4.4204	4.14116	4.75067	4.59104	4.15443	26.7254	0	0	0	0	0	4.45423
MAG16	0.7461	d__Bacteria;p__Pseudomonadota;c__Alphaproteobacteria;o__Rhizobiales;f__Methyloligellaceae;g__Methyloceanibacter;s__Unclassified	4.84655	4.60595	4.46676	4.875	5.60552	3.75286	7.04734	6.22836	6.37849	0.106045	0.274972	0.152952	1.28537	1.09312	0.759594	0.207251	0	1.43962	0	0	0	0	0.0855541	0	0	0	0	0	0	0	0	0	0	0.0597741	0.0647475	0.06862	53.4044	5.31187	0.17799	0.797493	0.014259	0	0.0321903
MAG160	0.7927	d__Bacteria;p__Actinomycetota;c__Acidimicrobiia;o__Acidimicrobiales;f__UBA8139;g__Rhabdothermincola_A;s__Unclassified	0	0	0	0	0	0	0	0	0	0	0	0	0	0	0	0	0	0	1.11853	1.29748	1.40311	1.09917	0.812462	0.81936	2.38045	2.19481	2.16874	1.76504	1.95414	2.0841	0.32393	0.349933	0.320008	0.298624	0.310659	0.324438	21.025	0	0	0	1.09169	2.09122	0.321265
MAG161	0.6877	d__Bacteria;p__Actinomycetota;c__Actinomycetia;o__Nanopelagicales;f__GCA-2699445;g__Unclassified;s__Unclassified	0	0	0	0	0	0	0	0	0	0	0	0	0	0	0	0	0	0	0.563184	0.561201	1.42038	1.03459	0.157472	0.173253	0.0443703	0	0	0.0316659	0.0790754	0.0479684	2.57205	2.63491	2.47268	2.76267	2.95945	2.34842	19.8633	0	0	0	0.65168	0.0338467	2.62503
MAG162	0.8076	d__Bacteria;p__Actinomycetota;c__Acidimicrobiia;o__Acidimicrobiales;f__Ilumatobacteraceae;g__Ilumatobacter;s__Unclassified	0	0	0	0	0	0	0	0	0	0	0	0	0.129926	0.177377	0.183078	0.113546	0	0.128059	0.47223	0.491455	0.786537	0.612484	0.51971	0.357068	0.0740886	0.0587059	0.0653286	0.0396636	0.120643	0.061996	1.68824	1.42077	1.46532	1.19094	1.26256	1.29749	12.7172	0	0	0.121998	0.539914	0.070071	1.38755
MAG163	0.814	d__Bacteria;p__Chloroflexota;c__Anaerolineae;o__Anaerolineales;f__UBA4823;g__DSOS01;s__Unclassified	0.860457	1.00688	1.23151	1.54173	1.04283	1.45801	1.00309	1.12456	0.965286	0	0	0	0.436634	0.385002	0.17026	0.1673	0	0.672404	0	0	0.0911403	0	0	0.13243	0	0	0	0	0	0	0	0	0	0	0	0	12.2895	1.13715	0	0.305267	0.0372617	0	0
MAG164	0.5001	d__Bacteria;p__Chloroflexota;c__Anaerolineae;o__Anaerolineales;f__UBA4823;g__PFL25;s__PFL25 sp020349245	0	0	0	0	0	0	0	0.0725429	0	1.49269	1.39398	1.98097	0	0	0	0	0	0	0	0	0	0	0	0	0	0	0	0	0	0	0	0	0	0	0	0	4.94018	0.00806032	1.62255	0	0	0	0
MAG165	0.7442	d__Bacteria;p__Pseudomonadota;c__Alphaproteobacteria;o__Rhizobiales;f__Methyloligellaceae;g__Methyloceanibacter;s__Unclassified	0	0	0	0	0.0740109	0	0	0	0	0	0	0	0	0	0	0	0	0	1.61628	1.56264	1.90557	1.3656	2.34358	1.92567	2.24022	2.22908	2.24959	1.53782	1.7362	1.8032	0.260267	0.264536	0.28002	0.201952	0.202447	0.247608	24.0463	0.00822343	0	0	1.78656	1.96602	0.242805
MAG166	0.6327	d__Bacteria;p__Chloroflexota;c__Anaerolineae;o__Anaerolineales;f__DRKV01;g__JAGUYX01;s__Unclassified	0.363497	0.369025	0.465756	0.426267	0.244474	0.673219	0.241561	0.258522	0.260086	0.0644474	0.0919794	0.0752148	1.9404	2.10706	1.95753	1.62332	1.32397	1.51907	0	0	0	0	0	0	0.0405684	0	0	0	0	0.0289706	0.307764	0.32204	0.321157	0.354218	0.365753	0.378699	16.1246	0.366934	0.0772139	1.74522	0	0.0115898	0.341605
MAG167	0.9685	d__Bacteria;p__Bacteroidota;c__Bacteroidia;o__Flavobacteriales;f__Flavobacteriaceae;g__Robiginitalea;s__Unclassified	0	0	0	0	0	0	0	0	0	0.116272	0	0.110774	0.106451	0.165799	0.232885	0	0	0	0	0	0.0975746	0	0	0	0.0376438	0	0	0	0.0495311	0.0463741	3.63572	3.46742	3.5791	3.13997	3.22646	3.60279	21.6148	0	0.0756819	0.0841892	0.0162624	0.0222582	3.44191
MAG168	0.9066	d__Bacteria;p__Pseudomonadota;c__Alphaproteobacteria;o__Rhizobiales;f__Rhizobiaceae;g__Salaquimonas;s__Unclassified	0	0	0	0	0	0	0	0	0	0	0	0	0	0	0	0	0	0	0.599074	0.487262	0.413963	0.616839	0.801804	0.535327	0.773201	0.827966	0.844531	0.363669	0.776167	0.68118	0.0657518	0.0684378	0.0636302	0.0692606	0.0807727	0.093779	8.16262	0	0	0	0.575712	0.711119	0.0736053
MAG169	0.6073	d__Bacteria;p__Pseudomonadota;c__Alphaproteobacteria;o__Rhizobiales;f__Aestuariivirgaceae;g__Anderseniella;s__Unclassified	0.136566	0.124894	0.183376	0.159117	0.219734	0.232484	0.162345	0.172178	0.283114	0.86615	1.11008	0.843866	0.964009	1.18249	1.48632	1.09546	0.853838	0.856114	1.01744	1.11544	1.24538	0.80372	1.11808	0.90673	0.810094	0.576762	0.671061	0.426263	1.03462	0.758974	3.25982	3.05127	3.29029	4.00321	4.19259	3.35964	42.5735	0.185979	0.940033	1.07304	1.03447	0.712963	3.52614
MAG17	0.9026	d__Bacteria;p__Acidobacteriota;c__Aminicenantia;o__UBA2199;f__UBA2199;g__Unclassified;s__Unclassified	0	0	0	0	0	0	0	0	0	0	0	0	0	0	0	0	0	0	0	0	0	0	0	0	0.376975	0.0534522	0.0546652	2.97877	0.769326	2.21788	0	0	0	0	0	0	6.45107	0	0	0	0	1.07518	0
MAG170	0.8981	d__Bacteria;p__Pseudomonadota;c__Alphaproteobacteria;o__Rhizobiales;f__Methyloligellaceae;g__Methyloceanibacter;s__Unclassified	0	0	0	0	0	0	0	0	0	0	0	0	0	0	0	0	0	0	1.27292	1.70782	1.49457	1.11459	1.21086	1.13787	0.700273	0.674159	0.698681	0.487387	0.766684	0.654971	0.196949	0.200686	0.204482	0.179047	0.196813	0.2337	13.1325	0	0	0	1.3231	0.663692	0.201946
MAG171	0.6206	d__Bacteria;p__Chloroflexota;c__Anaerolineae;o__Promineofilales;f__Promineofilaceae;g__JAKEFB01;s__Unclassified	0.0775329	0	0.07718	0.0714863	0.0603825	0.125971	0	0	0	0.178033	0.232806	0.183384	1.51976	1.75912	1.31168	1.36151	0.742461	0.75996	0	0	0	0	0	0	0	0	0	0	0	0	0.0886777	0.0939786	0.0952705	0.0924974	0.0970808	0.107801	9.03657	0.0458392	0.198075	1.24241	0	0	0.0958843
MAG172	0.667	d__Bacteria;p__Desulfobacterota;c__DSM-4660;o__Desulfatiglandales;f__Desulfatiglandaceae;g__B46-G9;s__Unclassified	0	0	0	0	0	0	0	0	0	0	0	0	0	0	0	0	0	0	0	0	0	0	0	0	0.614807	0.320637	0.347988	5.64084	1.70351	3.78535	0	0	0	0	0	0	12.4131	0	0	0	0	2.06886	0
MAG173	0.8243	d__Bacteria;p__Actinomycetota;c__Actinomycetia;o__Actinomycetales;f__Dermatophilaceae;g__Phycicoccus;s__Unclassified	0	0	0	0	0	0	0	0	0	0	0	0	0	0	0	0	0	0	0.105385	0.131327	0.141024	0.236002	0.141031	0.129567	0.822835	1.06563	1.1302	0.45221	0.914084	0.622738	0	0	0	0.0568577	0.0738794	0	6.02277	0	0	0	0.147389	0.834616	0.0217895
MAG174	0.7363	d__Bacteria;p__Fermentibacterota;c__Fermentibacteria;o__Fermentibacterales;f__Fermentibacteraceae;g__Aegiribacteria;s__Unclassified	0	0	0	0	0	0	0	0	0	0	0	0	0	0	0	0	0	0	0	0	0	0	0	0	0.112185	0	0	1.38695	0.217869	0.681613	0	0	0	0	0	0	2.39862	0	0	0	0	0.39977	0
MAG175	0.9371	d__Bacteria;p__Desulfobacterota;c__Desulfobacteria;o__Desulfobacterales;f__UBA11574;g__UBA11574;s__Unclassified	0	0	0	0	0	0	0	0	0	0	0	0	0	0	0	0	0	0	0	0	0	0	0	0	0.689742	0.586908	0.57994	1.61377	0.644605	1.18376	0	0	0	0	0	0	5.29872	0	0	0	0	0.88312	0
MAG176	0.8593	d__Archaea;p__Thermoproteota;c__Nitrososphaeria;o__Nitrososphaerales;f__Nitrososphaeraceae;g__TH1177;s__Unclassified	1.39976	1.16253	1.1674	1.1695	1.2128	0.957214	0.641652	1.05775	0.871845	0	0	0	0.25671	0.21019	0.121675	0.0579442	0	0.249074	0	0	0	0	0	0	0	0	0	0	0	0	0	0	0	0	0	0	10.536	1.07116	0	0.149265	0	0	0
MAG177	0.6781	d__Bacteria;p__Acidobacteriota;c__Thermoanaerobaculia;o__Thermoanaerobaculales;f__Sulfomarinibacteraceae;g__Sulfomarinibacter;s__Sulfomarinibacter sp022340665	0	0	0	0	0	0	0	0	0	0	0	0	0	0	0	0	0	0	0	0.0871675	0	0	0.164336	0	1.57763	1.48522	1.79528	0.457871	0.727501	0.788843	0	0	0	0	0	0	7.08385	0	0	0	0.0419172	1.13872	0
MAG178	0.5621	d__Bacteria;p__Pseudomonadota;c__Gammaproteobacteria;o__Woeseiales;f__Woeseiaceae;g__UBA1847;s__Unclassified	0	0	0	0	0	0	0	0	0	0	0	0	0	0	0	0	0	0	0.992112	1.01998	0.9376	1.00444	0.930454	0.870644	1.3915	1.49887	1.38594	0.834124	1.35818	1.06693	0.177863	0.188151	0.179451	0.153605	0.165635	0.206671	14.3621	0	0	0	0.959204	1.25592	0.178563
MAG179	0.5447	d__Bacteria;p__Pseudomonadota;c__Alphaproteobacteria;o__Rhizobiales;f__Aestuariivirgaceae;g__Anderseniella;s__Unclassified	0.114768	0.108781	0.154939	0.141616	0.18875	0.205459	0.147239	0.156872	0.255491	0.801756	1.01154	0.770328	0.890004	1.08311	1.3708	1.00643	0.790388	0.79368	0.935959	1.01319	1.12759	0.726742	1.04372	0.835272	1.07142	0.573335	0.674413	0.432803	0.97005	0.58269	3.01353	2.81718	3.0311	3.74324	3.90786	3.10826	39.6003	0.163768	0.861207	0.989069	0.947079	0.717453	3.2702
MAG18	0.6273	d__Bacteria;p__Chloroflexota;c__Anaerolineae;o__Promineofilales;f__Promineofilaceae;g__JAKEFB01;s__Unclassified	0.101937	0	0.113909	0.0968858	0.0786126	0.162609	0	0.0696155	0	0.205045	0.265282	0.215177	2.03477	2.0078	1.49607	0.967728	0.806601	0.844073	0	0	0	0	0	0	0	0	0	0	0	0	0.117004	0.117381	0.125508	0.120342	0.126033	0.138716	10.2111	0.0692854	0.228502	1.35951	0	0	0.124164
MAG180	0.6527	d__Bacteria;p__Desulfobacterota;c__Syntrophobacteria;o__BM002;f__BM002;g__BM002;s__Unclassified	0	0	0	0	0	0	0	0	0	0	0	0	0	0	0	0	0	0	3.70144	2.76299	1.77213	0.750001	1.1074	0.34983	0.14508	0.137575	0.131528	0	0.0456771	0.0392457	0.134772	0.16707	0.148858	0.0983833	0.102669	0.17518	11.7698	0	0	0	1.74063	0.0831842	0.137822
MAG181	0.7516	d__Bacteria;p__Actinomycetota;c__Actinomycetia;o__Nanopelagicales;f__GCA-2699445;g__Unclassified;s__Unclassified	0	0	0	0	0	0	0	0	0	0	0	0	0	0	0	0	0	0	0.54355	0.524458	1.37852	0.98487	0.160431	0.167951	0.0502741	0	0.0388422	0.0319394	0.0810995	0.0504734	2.93452	2.62938	2.64105	2.91104	3.08229	2.49526	20.7059	0	0	0	0.62663	0.0421048	2.78226
MAG182	0.6775	d__Bacteria;p__Actinomycetota;c__Actinomycetia;o__Nanopelagicales;f__GCA-2699445;g__Unclassified;s__Unclassified	0	0	0	0	0	0	0	0	0	0	0	0	0	0	0	0	0	0	0.574535	0.562759	1.44686	1.04596	0.163546	0.180371	0.0480776	0	0	0.0321237	0.084507	0.0524248	2.72503	2.57827	2.79154	2.8913	3.10506	2.4792	20.7616	0	0	0	0.662339	0.0361888	2.76173
MAG183	0.6688	d__Bacteria;p__Cyanobacteriota;c__Cyanobacteriia;o__Cyanobacteriales;f__Xenococcaceae;g__Waterburya;s__Unclassified	0	0	0	0	0	0	0	0	0	0	0	0	0	0	0	0	0	0	0.484495	0.736533	0.227676	3.01079	0.311251	0.650466	0	0	0	0	0	0	0	0	0	0	0	0	5.42121	0	0	0	0.903536	0	0
MAG184	0.9532	d__Bacteria;p__Bacteroidota;c__Bacteroidia;o__Bacteroidales;f__VadinHA17;g__SR-FBR-E99;s__Unclassified	0	0	0	0	0	0	0	0	0	0	0	0	0	0	0	0	0	0	0	0	0	0	0	0	0.811229	0.48315	0.402948	1.4743	0.811539	1.85066	0	0	0	0	0	0	5.83383	0	0	0	0	0.972305	0
MAG185	0.6538	d__Bacteria;p__Pseudomonadota;c__Alphaproteobacteria;o__Kiloniellales;f__JAKSDN01;g__Unclassified;s__Unclassified	3.22229	3.10773	2.46164	2.0422	1.98956	1.5763	1.02904	0.910951	0.899937	0	0	0	0.562364	0.668413	0.419613	0.186826	0	0.395816	1.20824	0.813608	1.23295	0.209844	5.07723	5.75963	0.0641032	0.0670917	0.0648296	0	0.0688177	0.0493564	0.147403	0.154623	0.147027	0.13542	0.156731	0.196006	35.0256	1.91552	0	0.372172	2.38358	0.0523665	0.156202
MAG186	0.8732	d__Bacteria;p__Pseudomonadota;c__Alphaproteobacteria;o__Rhizobiales;f__Rhizobiaceae;g__Salaquimonas;s__Unclassified	0	0	0	0	0	0	0	0	0	0	0	0	0	0	0	0	0	0	0.578371	0.473133	0.407376	0.647021	0.798366	0.539722	0.746014	0.802062	1.03249	0.325216	0.725681	0.522396	0.0678988	0.0709805	0.0708939	0.070078	0.0853663	0.097158	8.06022	0	0	0	0.573998	0.69231	0.0770626
MAG187	0.6803	d__Bacteria;p__Planctomycetota;c__Planctomycetia;o__Pirellulales;f__Pirellulaceae;g__GCA-2723275;s__Unclassified	0.158102	0.13196	0.187363	0.174519	0.162511	0.300125	0.0895547	0.106616	0.0976769	0	0.0959134	0	0.396073	0.629847	0.563779	0.404043	0.359516	0.400647	0.131404	0.148891	0.125342	0.175177	0	0	0.107821	0.0977017	0.103584	0.0564103	0.111629	0.0791681	0.805179	0.869362	0.917916	0.932935	0.82026	1.4144	11.1554	0.156492	0.0319711	0.458984	0.0968024	0.092719	0.960008
MAG188	0.9115	d__Bacteria;p__Desulfobacterota;c__Desulfobacteria;o__Desulfobacterales;f__UBA11574;g__UBA11574;s__Unclassified	1.09389	1.49119	2.10362	2.28818	2.11712	2.54668	2.67872	2.78073	2.35084	0	0	0	0.390726	0.265979	0.110533	0.245067	0	1.20544	0	0	0	0	0	0	0	0	0	0	0	0	0	0	0	0	0	0	21.6687	2.16122	0	0.369624	0	0	0
MAG189	0.6379	d__Bacteria;p__Chloroflexota;c__Anaerolineae;o__Anaerolineales;f__UBA4823;g__DSOS01;s__Unclassified	0.802395	0.924049	1.12373	1.13487	0.977966	1.33681	1.31825	1.13502	0.98756	0	0	0	0.405106	0.371949	0.155481	0.16413	0	0.64242	0	0	0.0740189	0	0	0	0	0	0	0	0	0	0	0	0	0	0	0	11.5538	1.08229	0	0.289848	0.0123365	0	0
MAG19	0.8988	d__Bacteria;p__Pseudomonadota;c__Alphaproteobacteria;o__Rhizobiales;f__Rhizobiaceae;g__Salaquimonas;s__Unclassified	0	0	0	0	0	0	0	0	0	0	0	0	0	0	0	0	0	0	0.542989	0.453745	0.379712	0.630186	0.750108	0.514201	0.667115	0.945638	0.751053	0.285836	0.674622	0.469388	0.0657207	0.0713489	0.070307	0.0666393	0.0827931	0.0940241	7.51543	0	0	0	0.545157	0.632276	0.0751389
MAG190	0.9476	d__Bacteria;p__Synergistota;c__Synergistia;o__Synergistales;f__79-D21;g__79-D21;s__Unclassified	0	0	0	0	0	0	0	0	0	0	0	0	0	0	0	1.08821	2.88402	0.542839	0	0	0	0	0	0	0	0	0	0	0	0	0	0	0	0	0	0	4.51507	0	0	0.752512	0	0	0
MAG191	0.7147	d__Bacteria;p__Chloroflexota;c__Anaerolineae;o__Anaerolineales;f__UBA11858;g__B10-G9;s__Unclassified	0	0	0	0	0	0	0	0	0	0	0	0	0	0	0	0	0	0	0	0	0	0	0	0	0.643025	0.184943	0.182002	1.15196	0.559002	1.38254	0	0	0	0	0	0	4.10347	0	0	0	0	0.683911	0
MAG192	0.8558	d__Bacteria;p__Bacteroidota;c__Bacteroidia;o__Flavobacteriales;f__Flavobacteriaceae;g__Robiginitalea;s__Unclassified	0	0	0	0	0	0	0	0	0	0	0	0	0	0	0	0	0	0	0.79105	1.33734	0.445485	0.552681	0.518709	0.585218	0.20578	0.120911	0.133383	0.203096	0.349491	0.218552	0	0	0	0	0	0	5.4617	0	0	0	0.705081	0.205202	0
MAG193	0.5311	d__Bacteria;p__Gemmatimonadota;c__Gemmatimonadetes;o__Longimicrobiales;f__UBA6960;g__IDS-52;s__Unclassified	0	0	0	0	0	0	0	0	0	0	0	0	0	0	0	0	0	0	0.657759	0.973275	0.404932	0.145075	0.844088	0.746074	0.482204	0.368401	0.30481	0.49959	1.38877	0.544871	0	0	0	0	0	0	7.35984	0	0	0	0.628534	0.598107	0
MAG194	0.5493	d__Bacteria;p__Desulfobacterota;c__Desulfobulbia;o__Desulfobulbales;f__Desulfocapsaceae;g__JABDQA01;s__Unclassified	0	0	0	0	0	0	0	0	0	0	0	0	0	0	0	0	0	0	0.209096	0.186948	0.147377	0.0988051	0.318369	0.290603	0.91571	0.733463	0.711417	0.308283	0.630854	0.484559	0	0	0	0	0	0	5.03548	0	0	0	0.208533	0.630714	0
MAG195	0.8588	d__Bacteria;p__Desulfobacterota;c__Desulfobacteria;o__Desulfobacterales;f__B30-G6;g__Unclassified;s__Unclassified	0	0	0	0	0	0	0	0	0	0	0	0	0	0	0	0	0	0	0.0988571	0.12947	0	0	0.166335	0	1.16865	0.945941	0.943155	1.25126	1.28179	1.69533	0	0	0	0	0	0	7.6808	0	0	0	0.0657769	1.21436	0
MAG196	0.7463	d__Bacteria;p__Pseudomonadota;c__Alphaproteobacteria;o__Rhizobiales;f__Rhizobiaceae;g__Unclassified;s__Unclassified	1.5498	1.4771	1.78107	2.02065	2.20161	1.889	2.13706	2.31385	2.27507	0	0	0	0.468341	0.41774	0.273769	0.0889773	0	0.582108	0	0	0	0	0	0	0	0	0	0	0	0	0	0	0	0	0	0	19.4761	1.96058	0	0.305156	0	0	0
MAG197	0.8126	d__Bacteria;p__Bacteroidota;c__Bacteroidia;o__Flavobacteriales;f__Flavobacteriaceae;g__Robiginitalea;s__Unclassified	0	0	0	0	0	0	0	0	0	0	0	0	0	0	0	0	0	0	0.788494	0.743588	0.447392	0.553057	0.511134	0.582091	0.204723	0.122074	0.135869	0.202276	0.351438	0.36609	0	0	0	0	0	0	5.00823	0	0	0	0.604293	0.230412	0
MAG198	0.6596	d__Bacteria;p__Actinomycetota;c__Actinomycetia;o__Nanopelagicales;f__GCA-2699445;g__Unclassified;s__Unclassified	0	0	0	0	0	0	0	0	0	0	0	0	0.0723389	0.154174	0.104864	0	0	0	0.545809	0.515036	1.35034	0.952944	0.161537	0.180788	0.055364	0	0.0435053	0.0363338	0.0842526	0.0556533	3.20838	3.02965	3.03363	3.18815	3.53733	2.757	23.0671	0	0	0.0552294	0.617743	0.0458515	3.12569
MAG199	0.747	d__Bacteria;p__Chloroflexota;c__Anaerolineae;o__Promineofilales;f__Promineofilaceae;g__JAKEFB01;s__Unclassified	0.12589	0.115958	0.139834	0.124772	0.105816	0.201583	0.0789149	0.0891556	0.0880956	0.220718	0.301926	0.23535	1.8418	2.74482	1.62678	1.02292	0.847501	0.888357	0	0	0	0	0	0	0	0	0	0	0	0	0.149616	0.150875	0.156097	0.154332	0.157364	0.171068	11.7395	0.118891	0.252665	1.49536	0	0	0.156559
MAG2	0.5317	d__Bacteria;p__Chloroflexota;c__Anaerolineae;o__Promineofilales;f__Promineofilaceae;g__Unclassified;s__Unclassified	0.308834	0.290491	0.340177	0.311058	0.247767	0.411453	0.184463	0.198354	0.179426	0.0959359	0.150902	0.097753	1.84041	1.55824	1.55875	1.14108	0.946322	0.809895	0	0	0	0	0	0	0	0	0	0	0	0	0.254321	0.265177	0.268977	0.278194	0.269917	0.289204	12.2971	0.274669	0.114864	1.30911	0	0	0.270965
MAG20	0.9581	d__Bacteria;p__Desulfobacterota;c__Desulfobacteria;o__Desulfobacterales;f__UBA11574;g__UBA11574;s__Unclassified	1.21541	1.66672	2.34266	2.57496	2.34143	2.83583	2.39832	3.41967	2.56926	0	0	0	0.435291	0.289427	0.118307	0.263417	0	1.32669	0	0	0	0	0	0	0	0	0	0	0	0	0	0	0	0	0	0	23.7974	2.3738	0	0.405521	0	0	0
MAG200	0.7174	d__Archaea;p__Halobacteriota;c__Methanomicrobia;o__Methanomicrobiales;f__Methanomicrobiaceae;g__Methanogenium;s__Unclassified	0	0	0	0	0	0	0	0	0	0.0853331	0.0945989	0.0992153	0.687253	0.914861	0.967999	4.09386	3.42296	3.95505	0	0	0	0	0	0	0	0	0	0	0	0	0	0	0	0	0	0	14.3211	0	0.0930491	2.34033	0	0	0
MAG201	0.6259	d__Bacteria;p__Actinomycetota;c__Thermoleophilia;o__Solirubrobacterales;f__70-9;g__JAJKHV01;s__Unclassified	2.64771	3.00619	1.27263	0.257952	0.248825	0.187655	0.823015	0.438265	0.217662	0	0	0	0	0	0	0	0	0	0	0	0	0	0	0	0	0	0	0	0	0	0	0	0	0	0	0	9.09991	1.0111	0	0	0	0	0
MAG202	0.8834	d__Bacteria;p__Pseudomonadota;c__Alphaproteobacteria;o__Rhizobiales;f__Rhizobiaceae;g__Salaquimonas;s__Unclassified	0	0	0	0	0	0	0	0	0	0	0	0	0	0	0	0	0	0	0.573872	0.482743	0.412196	0.630506	0.817784	0.527236	0.770296	0.811909	0.832082	0.360518	0.980325	0.556972	0.0781258	0.0788609	0.0795752	0.0825602	0.0969169	0.0987377	8.27122	0	0	0	0.574056	0.718684	0.0857961
MAG203	0.8576	d__Bacteria;p__Pseudomonadota;c__Alphaproteobacteria;o__Rhizobiales;f__Rhizobiaceae;g__Unclassified;s__Unclassified	1.57856	1.47036	1.76066	1.9966	2.18845	1.85905	2.50495	1.98616	2.27616	0	0	0	0.455937	0.406402	0.265614	0.086692	0	0.563851	0	0	0	0	0	0	0	0	0	0	0	0	0	0	0	0	0	0	19.3994	1.95788	0	0.296416	0	0	0
MAG204	0.8061	d__Bacteria;p__Chloroflexota;c__Anaerolineae;o__Anaerolineales;f__UBA4823;g__DSOS01;s__Unclassified	0.860385	0.994666	1.22363	1.22535	1.04593	1.42059	1.08368	1.47416	1.02681	0	0	0	0.466064	0.409534	0.173975	0.176055	0	0.702465	0	0	0.0871005	0	0	0.136927	0	0	0	0	0	0	0	0	0	0	0	0	12.5073	1.15058	0	0.321349	0.037338	0	0
MAG205	0.6128	d__Bacteria;p__Bacteroidota;c__Bacteroidia;o__Flavobacteriales;f__Flavobacteriaceae;g__Robiginitalea;s__Unclassified	0	0	0	0	0	0	0	0	0	0	0	0	0	0	0	0	0	0	0.643318	0.601559	0.360644	0.455224	1.06377	0.469373	0.164327	0.0966919	0.106066	0.163585	0.280311	0.190003	0	0	0	0	0	0	4.59487	0	0	0	0.598982	0.16683	0
MAG206	0.855	d__Bacteria;p__Bacteroidota;c__Bacteroidia;o__Bacteroidales;f__UBA5342;g__Unclassified;s__Unclassified	0	0	0	0	0	0	0	0	0	0.12455	4.0786	0.075689	0	0	0	0	0	0	0	0	0	0	0	0	0	0	0	0	0	0	0	0	0	0	0	0	4.27883	0	1.42628	0	0	0	0
MAG207	0.687	d__Bacteria;p__Pseudomonadota;c__Alphaproteobacteria;o__Rhizobiales;f__Xanthobacteraceae;g__Pseudolabrys;s__Unclassified	2.66436	2.44133	2.54239	3.21247	3.88672	2.23728	6.11289	5.30308	4.72875	0.136018	0.177025	0.200794	0.522074	0.514513	0.255359	0	0	0.44327	0	0	0	0	0	0	0	0	0	0	0	0	0	0	0	0	0	0	35.3783	3.68103	0.171279	0.289203	0	0	0
MAG208	0.5617	d__Bacteria;p__Bacteroidota;c__Ignavibacteria;o__Ignavibacteriales;f__Ignavibacteriaceae;g__Unclassified;s__Unclassified	0	0	0	0	0	0	0	0	0	0	0	0	0	0	0	0	0	0	0	0	0	0	0	0	0.194912	0.118712	0.119108	0.962068	0.294005	0.614235	0	0	0	0	0	0	2.30304	0	0	0	0	0.38384	0
MAG209	0.8717	d__Bacteria;p__Gemmatimonadota;c__Gemmatimonadetes;o__Longimicrobiales;f__UBA6960;g__Unclassified;s__Unclassified	0	0	0	0	0	0	0	0	0	0	0	0	0	0	0	0	0	0	0	0	0	0	0.18257	0	0.098811	0	0	1.26998	1.04785	0.54037	0	0	0	0	0	0	3.13958	0	0	0	0.0304283	0.492835	0
MAG21	0.7528	d__Archaea;p__Halobacteriota;c__Methanosarcinia;o__Methanosarcinales;f__Methanosarcinaceae;g__Methanosarcina;s__Unclassified	0	0	0.0727561	0.0735369	0.0770341	0.113383	0	0	0	0.0868462	0.10136	0.118242	0.305555	0.264944	0.192791	1.44871	1.24265	2.41174	0	0	0	0	0	0	0	0	0	0	0	0	0	0	0	0	0	0	6.50955	0.0374122	0.10215	0.977732	0	0	0
MAG210	0.7999	d__Bacteria;p__Pseudomonadota;c__Gammaproteobacteria;o__XN24;f__XN24;g__Unclassified;s__Unclassified	0	0	0	0	0	0	0	0	0	0	0	0	0	0	0	0	0	0	0	0	0	0	0	0	0	0	0	0	0	0	0.988236	1.06203	1.4571	0.523875	0.378778	0.964837	5.37485	0	0	0	0	0	0.895809
MAG211	0.5262	d__Bacteria;p__Pseudomonadota;c__Alphaproteobacteria;o__Rhizobiales;f__Methyloligellaceae;g__Methyloceanibacter;s__Unclassified	0	0	0	0	0	0	0	0	0	0	0	0	0	0	0	0	0	0	0.928444	0.94678	1.09759	0.802822	1.24487	2.07602	0.546629	0.517053	0.53037	0.384445	0.58223	0.514673	0.107381	0.115259	0.112384	0.0994528	0.101356	0.137449	10.8452	0	0	0	1.18275	0.512567	0.112214
MAG212	0.8429	d__Bacteria;p__Actinomycetota;c__Actinomycetia;o__Jiangellales;f__Unclassified;g__Unclassified;s__Unclassified	0	0	0	0	0	0	0	0	0	0	0	0	0	0	0	0	0	0	1.51919	1.90377	1.60148	2.10931	1.42719	1.2467	0.945154	1.33459	1.24155	0.977897	1.63843	0.997775	0	0	0	0	0	0	16.943	0	0	0	1.63461	1.18923	0
MAG213	0.5032	d__Bacteria;p__Pseudomonadota;c__Gammaproteobacteria;o__Woeseiales;f__Woeseiaceae;g__JAACFE01;s__Unclassified	0	0	0	0	0	0	0	0.0716081	0	3.94376	5.44376	3.93982	0.107054	0	0.0969927	0	0	0	0	0	0	0	0	0	0	0	0	0	0	0	0	0	0	0	0	0	13.603	0.00795645	4.44245	0.0340077	0	0	0
MAG214	0.5122	d__Bacteria;p__Chloroflexota;c__Anaerolineae;o__Promineofilales;f__Promineofilaceae;g__JAACFF01;s__Unclassified	0	0	0	0	0	0.104097	0	0	0	0	0	0	0	0	0	0	0	0	0.277013	0.344075	0.353772	0.329746	0.227539	0.170597	4.82103	4.99415	4.46253	2.76208	1.95894	2.88689	0.0927064	0.0983892	0.0944659	0.11607	0.104684	0.127029	24.3258	0.0115663	0	0	0.28379	3.6476	0.105557
MAG215	0.7706	d__Bacteria;p__Bacteroidota;c__Bacteroidia;o__Chitinophagales;f__Saprospiraceae;g__Unclassified;s__Unclassified	0	0	0	0	0	0	0	0	0	0	0	0	0.326418	0.273028	0.220434	1.0228	1.23518	1.90632	0	0	0	0	0	0	0	0	0	0	0	0	0	0	0	0	0	0	4.98419	0	0	0.830698	0	0	0
MAG216	0.5263	d__Bacteria;p__Nitrospirota;c__Nitrospiria;o__Nitrospirales;f__UBA8639;g__UBA8639;s__Unclassified	1.81405	1.8387	1.60271	1.60086	1.50467	1.38708	2.28783	1.79188	1.62477	0	0	0	0.326742	0.472679	0.276725	0.169643	0	0.603444	0	0	0	0	0.135853	0.185735	0	0	0	0	0	0	0	0	0	0	0	0	17.6234	1.71695	0	0.308205	0.053598	0	0
MAG217	0.8154	d__Bacteria;p__Chloroflexota;c__Anaerolineae;o__Anaerolineales;f__UBA4823;g__PFL25;s__Unclassified	1.38246	1.91584	1.82406	1.99164	1.9337	2.32171	1.20619	1.46403	1.77359	0	0	0	0.200994	0.157989	0	0.150009	0	0.648121	0	0	0	0	0	0	0	0	0	0	0	0	0	0	0	0	0.0431922	0	17.0135	1.75702	0	0.192852	0	0	0.00719869
MAG218	0.65	d__Bacteria;p__Pseudomonadota;c__Alphaproteobacteria;o__Sphingomonadales;f__Sphingomonadaceae;g__Erythrobacter;s__Unclassified	0	0	0	0	0	0	0	0	0	0.0550859	0	0	0.136674	0.149377	0.175255	2.03459	1.23046	0.886393	0	0	0	0	0	0	0	0	0	0	0	0	0	0	0	0	0	0	4.66784	0	0.018362	0.768792	0	0	0
MAG219	0.877	d__Bacteria;p__Bacteroidota;c__Bacteroidia;o__Flavobacteriales;f__Flavobacteriaceae;g__Flavobacterium;s__Unclassified	0.534961	0.445217	0.517632	0.835887	1.04354	1.20396	0.647431	0.691868	1.48896	0	0	0	1.59618	0.381792	0.898888	0.552275	0	0	0	0	0	0	0	0	0	0	0	0	0	0	0	0	0	0	0	0	10.8386	0.823273	0	0.571522	0	0	0
MAG22	0.7158	d__Bacteria;p__Pseudomonadota;c__Gammaproteobacteria;o__XN24;f__XN24;g__Unclassified;s__Unclassified	0	0	0	0	0	0	0	0	0	0	0	0	0	0	0	0	0	0	0	0	0	0	0	0	0	0	0	0	0	0	0.923521	0.998354	1.00655	0.507651	0.372487	1.30811	5.11668	0	0	0	0	0	0.85278
MAG220	0.5244	d__Bacteria;p__Pseudomonadota;c__Gammaproteobacteria;o__Arenicellales;f__BMS3Bbin11;g__BMS3Bbin11;s__Unclassified	0	0	0	0	0	0	0	0	0	0	0	0	0	0	0	0	0	0	0.133042	0.17635	0.139489	0.108661	0	0	1.15933	1.08754	1.19714	0.104565	0.174095	0.152869	0	0	0	0	0	0	4.43309	0	0	0	0.0929239	0.645924	0
MAG221	0.5066	d__Bacteria;p__Desulfobacterota;c__Desulfobacteria;o__Desulfobacterales;f__B30-G6;g__Unclassified;s__Unclassified	0	0	0	0	0	0	0	0	0	0	0	0	0	0	0	0	0	0	0	0.159596	0	0	0.180932	0	0.583742	0.75902	0.491887	0.714502	0.623721	0.986611	0	0	0	0	0	0	4.50001	0	0	0	0.0567547	0.693247	0
MAG222	0.7978	d__Bacteria;p__Bacteroidota;c__Bacteroidia;o__Bacteroidales;f__VadinHA17;g__SR-FBR-E99;s__Unclassified	0	0	0	0	0	0	0	0	0	0	0	0	0	0	0	0	0	0	0	0	0	0	0	0	0.649474	0.416749	0.35543	0.969655	0.941128	1.35764	0	0	0	0	0	0	4.69008	0	0	0	0	0.781679	0
MAG223	0.9159	d__Archaea;p__Thermoproteota;c__Nitrososphaeria;o__Nitrososphaerales;f__Nitrososphaeraceae;g__TH1177;s__Unclassified	1.41848	1.17272	1.22395	1.26036	1.55871	1.03634	0.673528	0.762247	0.906765	0	0	0	0.26142	0.21643	0.128754	0.0659078	0	0.294148	0	0	0	0	0	0	0	0	0	0	0	0	0	0	0	0	0	0	10.9798	1.11257	0	0.16111	0	0	0
MAG224	0.5453	d__Bacteria;p__Desulfobacterota_D;c__UBA1144;o__UBA2774;f__UBA2774;g__2-12-FULL-53-21;s__Unclassified	1.58987	1.44	1.08665	1.17991	1.55254	0.591877	2.69491	2.00435	2.02121	0.23996	0.269926	0.35924	0.243222	0.17483	0.130948	0.0612273	0	0.622778	0	0	0	0	0	0	0	0	0	0	0	0	0	0	0	0	0	0	16.2634	1.57348	0.289709	0.205501	0	0	0
MAG225	0.7004	d__Bacteria;p__Bacteroidota;c__Bacteroidia;o__Flavobacteriales;f__Flavobacteriaceae;g__Lutibacter;s__Unclassified	0	0	0	0	0	0	0	0	0	0	0	0	0	0	0	1.17907	4.55926	2.07572	0	0	0	0	0	0	0	0	0	0	0	0	0	0	0	0	0	0	7.81405	0	0	1.30234	0	0	0
MAG226	0.5107	d__Bacteria;p__Planctomycetota;c__Planctomycetia;o__Pirellulales;f__Pirellulaceae;g__Rubripirellula;s__Unclassified	0	0	0	0	0	0	0	0	0	0	0	0	0	0	0	0	0	0	1.40578	1.63407	1.81179	2.46674	1.22029	1.3204	0.518662	0.511374	0.53801	0.413948	0.698684	0.514544	0.0978853	0.100324	0.101782	0.0902078	0.0946209	0.120631	13.6597	0	0	0	1.64318	0.532537	0.100909
MAG227	0.65	d__Bacteria;p__Actinomycetota;c__Actinomycetia;o__Actinomycetales;f__Dermatophilaceae;g__Phycicoccus;s__Unclassified	0.452183	0.470974	0.531685	0.443973	0.451344	0.720692	0.334404	0.308304	0.475493	0.0874632	0.249896	0.101527	0.515901	0.530237	0.591074	1.57274	0.778615	3.05097	0	0	0	0	0	0	0	0	0	0	0.0343613	0.0288404	0.270325	0.254208	0.236627	0.351978	0.402031	0.252307	13.4982	0.46545	0.146295	1.17326	0	0.0105336	0.294579
MAG228	0.6672	d__Bacteria;p__Pseudomonadota;c__Gammaproteobacteria;o__Pseudomonadales;f__Halieaceae;g__Halioglobus;s__Unclassified	0	0	0	0	0	0	0	0	0	0	0	0	0.0561417	0.153528	0.172874	0	0.120193	0	0.561523	0.598907	1.30882	0.287823	0.39334	0.453096	0.0554398	0.0472779	0.0506347	0.0264102	0.0887256	0.0267672	1.52179	1.91521	1.36393	0.788168	0.570448	0.975087	11.5361	0	0	0.0837894	0.600584	0.0492092	1.18911
MAG229	0.9177	d__Bacteria;p__Bacteroidota;c__Ignavibacteria;o__Ignavibacteriales;f__Melioribacteraceae;g__GCA-2746605;s__Unclassified	0	0	0	0	0	0	0	0	0	0	0	0	0	0	0	0	0	0	0	0	0	0	0	0	0.263042	0.0724671	0.0807792	1.1882	0.260162	0.690375	0	0	0	0	0	0	2.55503	0	0	0	0	0.425838	0
MAG23	0.8134	d__Bacteria;p__Actinomycetota;c__Actinomycetia;o__Actinomycetales;f__Dermatophilaceae;g__Phycicoccus;s__Unclassified	0	0	0	0	0	0	0	0	0	0	0	0	0	0	0	0	0	0	0.126431	0.162803	0.176686	0.265566	0.152275	0.151217	0.873724	1.11418	1.20235	0.500023	0.744317	0.806765	0	0	0	0.0594514	0.0727559	0	6.40855	0	0	0	0.172496	0.873561	0.0220346
MAG230	0.6797	d__Bacteria;p__Pseudomonadota;c__Gammaproteobacteria;o__Steroidobacterales;f__Steroidobacteraceae;g__Unclassified;s__Unclassified	0	0	0	0	0	0	0	0	0	0.203865	0.151919	0.176111	0.144924	0.253001	0.202525	0	0	0	0	0	0	0	0	0	0.0634435	0.048032	0.0522275	0.0547472	0.0975989	0.0946879	1.67554	1.58221	1.51853	1.56458	1.34428	1.36748	10.5957	0	0.177299	0.100075	0	0.0684562	1.50877
MAG231	0.6649	d__Bacteria;p__Pseudomonadota;c__Gammaproteobacteria;o__Acidiferrobacterales;f__SPGG2;g__SZUA-472;s__SZUA-472 sp003251795	1.89602	2.48629	1.39664	1.02579	0.658859	0.526703	2.67678	1.81701	1.4574	0	0	0	0.0848141	0	0	0.0807339	0	0.130025	0	0	0	0	0	0	0	0	0	0	0	0	0	0	0	0	0	0	14.2371	1.54906	0	0.0492622	0	0	0
MAG232	0.7106	d__Bacteria;p__Desulfobacterota;c__Syntrophobacteria;o__BM002;f__BM002;g__BM002;s__Unclassified	0	0	0	0	0	0	0	0	0	0	0	0	0	0	0	0	0	0	3.01741	2.62031	2.3084	0.712343	1.0592	0.352563	0.1219	0.121243	0.117046	0	0.038586	0.031281	0.124997	0.158849	0.136896	0.0938235	0.0990683	0.168121	11.282	0	0	0	1.67837	0.071676	0.130293
MAG233	0.5774	d__Bacteria;p__Bacteroidota;c__Ignavibacteria;o__Ignavibacteriales;f__Ignavibacteriaceae;g__Unclassified;s__Unclassified	0	0	0	0	0	0	0	0	0	0	0	0	0	0	0	0	0	0	0	0	0	0	0	0	0.180047	0.120805	0.12085	0.742972	0.25357	0.714593	0	0	0	0	0	0	2.13284	0	0	0	0	0.355473	0
MAG234	0.9369	d__Archaea;p__Thermoproteota;c__Nitrososphaeria;o__Nitrososphaerales;f__Nitrososphaeraceae;g__TH1177;s__Unclassified	1.38564	1.16922	1.15207	1.18897	1.22551	0.974944	0.648536	0.737596	1.22802	0	0	0	0.260492	0.211474	0.127884	0.0595887	0	0.259254	0	0	0	0	0	0	0	0	0	0	0	0	0	0	0	0	0	0	10.6292	1.07894	0	0.153115	0	0	0
MAG235	0.5131	d__Bacteria;p__Chloroflexota;c__Anaerolineae;o__Promineofilales;f__Promineofilaceae;g__UBA11865;s__Unclassified	1.18127	1.31461	1.28925	1.84683	1.14107	1.3371	0.577799	0.593422	0.613124	0	0	0	0.48298	0.642677	0.448602	0.0792858	0	0.216826	0	0	0	0	0	0	0	0	0	0	0	0	0	0	0	0	0	0	11.7648	1.09939	0	0.311729	0	0	0
MAG236	0.7948	d__Bacteria;p__Bacteroidota;c__Bacteroidia;o__Bacteroidales;f__F082;g__UBA4459;s__Unclassified	0	0	0	0	0	0	0	0	0	0	0	0	0	0	0	0.5927	3.47706	0	0	0	0	0	0	0	0	0	0	0	0	0	0	0	0	0	0	0	4.06976	0	0	0.678293	0	0	0
MAG237	0.9573	d__Bacteria;p__Actinomycetota;c__Acidimicrobiia;o__UBA5794;f__JAHEDJ01;g__JAHEDJ01;s__Unclassified	0	0	0	0	0	0	0	0.0842299	0	9.87225	6.36277	9.83001	0	0	0	0	0	0	0	0	0	0	0	0	0	0	0	0	0	0	0	0	0	0	0	0	26.1493	0.00935888	8.68835	0	0	0	0
MAG238	0.8883	d__Bacteria;p__Bacteroidota;c__Ignavibacteria;o__Ignavibacteriales;f__Melioribacteraceae;g__GCA-2746605;s__Unclassified	0	0	0	0	0	0	0	0	0	0	0	0	0	0	0	0	0	0	0	0	0	0	0	0	0.232622	0.0425263	0.0492544	0.924525	0.236718	0.858044	0	0	0	0	0	0	2.34369	0	0	0	0	0.390615	0
MAG239	0.8112	d__Bacteria;p__Myxococcota;c__Polyangia;o__Haliangiales;f__Haliangiaceae;g__Unclassified;s__Unclassified	0	0	0	0	0	0	0.0750262	0	0.114411	0	0	0	0.142075	0.284381	4.85419	0.232831	0	0.19807	0	0	0	0	0	0.342331	0	0	0	0	0	0	0	0	0	0	0	0	6.24331	0.0210485	0	0.951924	0.0570551	0	0
MAG24	0.8648	d__Archaea;p__Thermoproteota;c__Nitrososphaeria;o__Nitrososphaerales;f__Nitrososphaeraceae;g__TH1177;s__Unclassified	1.6029	1.33864	1.31338	1.62768	1.35849	1.04475	0.67143	0.776235	0.916585	0	0	0	0.256072	0.212118	0.120636	0.0737863	0	0.31018	0	0	0	0	0	0	0	0	0	0	0	0	0	0	0	0	0	0	11.6229	1.18334	0	0.162132	0	0	0
MAG240	0.8601	d__Bacteria;p__Actinomycetota;c__Actinomycetia;o__Actinomycetales;f__Dermatophilaceae;g__Phycicoccus;s__Unclassified	0.685402	0.715188	0.797953	0.643543	0.674789	1.05936	0.521987	0.471811	0.745641	0.133877	0.38373	0.15229	0.717551	0.723629	0.783155	2.65334	1.08878	2.67848	0	0	0	0.0818172	0	0	0.0494584	0.0505213	0.0527699	0.0282274	0.0554311	0.0465617	0.423803	0.400207	0.375723	0.546106	0.623869	0.39846	18.7635	0.701741	0.223299	1.44082	0.0136362	0.0471616	0.461361
MAG241	0.6266	d__Bacteria;p__Pseudomonadota;c__Gammaproteobacteria;o__XN24;f__XN24;g__JAHEFR01;s__Unclassified	0	0	0	0	0	0	0	0	0	0.0690132	0	0.0649314	0	0	0	0	0	0	7.91933	6.10607	6.51273	2.27065	5.13514	3.46063	0.53754	0.350547	0.364568	0.338152	0.881523	0.49864	0.26979	0.28592	0.293804	0.146307	0.125183	0.282717	35.9132	0	0.0446482	0	5.23409	0.495162	0.233954
MAG242	0.6044	d__Bacteria;p__Pseudomonadota;c__Alphaproteobacteria;o__Rhizobiales;f__Aestuariivirgaceae;g__Anderseniella;s__Unclassified	0.127088	0.118012	0.156276	0.143457	0.201343	0.216057	0.147607	0.163888	0.25436	0.79965	1.01869	0.768569	0.894387	1.08803	1.38731	1.03223	0.798712	0.804572	0.939622	1.03837	1.15138	0.77559	1.02617	0.85072	0.743168	0.517032	0.931624	0.382861	0.946931	0.541273	2.99164	2.80098	3.01531	3.6766	3.84238	3.08412	39.376	0.169788	0.862304	1.00087	0.963643	0.677148	3.23517
MAG243	0.7267	d__Bacteria;p__Bacteroidota;c__Bacteroidia;o__Bacteroidales;f__VadinHA17;g__SR-FBR-E99;s__Unclassified	0	0	0	0	0	0	0	0	0	0	0	0	0	0	0	0	0	0	0	0	0	0	0	0	0.895314	0.390205	0.324427	0.986935	0.630079	1.42267	0	0	0	0	0	0	4.64962	0	0	0	0	0.774937	0
MAG244	0.5136	d__Bacteria;p__Myxococcota;c__Polyangia;o__GCA-2747355;f__Unclassified;g__Unclassified;s__Unclassified	0	0	0	0	0	0	0	0	0	0	0	0	0	0	0	0	0	0	0	0	0	0	0.117536	0	0.0888458	0	0	0.553488	0.347595	0.871248	0	0	0	0	0	0	1.97871	0	0	0	0.0195894	0.310196	0
MAG245	0.956	d__Bacteria;p__Bacteroidota;c__Bacteroidia;o__Flavobacteriales;f__Flavobacteriaceae;g__HKST-UBA85;s__Unclassified	0	0	0	0	0	0	0	0	0	0.137738	0.196753	0.250202	3.25996	3.06807	2.49093	8.2411	11.4602	5.09154	0	0	0	0	0	0	0	0	0	0	0	0	0	0	0	0	0	0	34.1965	0	0.194898	5.60197	0	0	0
MAG246	0.7539	d__Bacteria;p__Pseudomonadota;c__Gammaproteobacteria;o__Chromatiales;f__Sedimenticolaceae;g__Sva-25;s__Unclassified	0	0	0	0	0	0	0	0	0	0	0	0	0	0	0	0	0	0	0	0	0	0	0	0	1.32687	1.50581	1.71229	0.1054	0.11325	0.112481	0	0	0	0	0	0	4.8761	0	0	0	0	0.812683	0
MAG247	0.7909	d__Bacteria;p__Desulfobacterota;c__Desulfobacteria;o__Desulfobacterales;f__B30-G6;g__Unclassified;s__Unclassified	0	0	0	0	0	0	0	0	0	0	0	0	0	0	0	0	0	0	0	0	0	0	0.124703	0	0.89495	0.667661	0.684532	1.25754	0.974557	1.52273	0	0	0	0	0	0	6.12668	0	0	0	0.0207838	1.00033	0
MAG248	0.5848	d__Bacteria;p__Planctomycetota;c__Planctomycetia;o__Pirellulales;f__Pirellulaceae;g__JAGQPK01;s__Unclassified	0.14495	0.122231	0.182281	0.168874	0.159358	0.293022	0.0873451	0.103466	0.0938762	0	0.0862966	0	0.381046	0.607707	0.531585	0.368946	0.334596	0.367691	0.111111	0.128256	0.103523	0.161781	0	0	0.0959627	0.0882309	0.0956325	0.0501043	0.10295	0.0736976	1.20523	0.816789	0.854365	0.867028	0.754044	0.854156	10.3961	0.1506	0.0287655	0.431928	0.0841119	0.0844296	0.891935
MAG249	0.7456	d__Bacteria;p__Pseudomonadota;c__Alphaproteobacteria;o__Rhizobiales;f__Methyloligellaceae;g__Methyloceanibacter;s__Unclassified	0	0	0	0	0	0	0	0	0	0	0	0	0	0	0	0	0	0	1.14842	1.18142	1.39114	1.44641	1.05854	1.04247	0.534757	0.501311	0.526165	0.388537	0.661415	0.540942	0.12915	0.137864	0.13611	0.120037	0.125937	0.17391	11.2445	0	0	0	1.2114	0.525521	0.137168
MAG25	0.6632	d__Bacteria;p__Actinomycetota;c__Actinomycetia;o__Jiangellales;f__Unclassified;g__Unclassified;s__Unclassified	0	0	0	0	0	0	0	0	0	0	0	0	0.0894698	0.253622	0.191718	0	0	0	0.748738	0.933911	0.8417	0.944346	0.489865	0.452701	1.08815	1.12935	1.17381	0.384152	0.621038	0.520094	2.17825	2.15674	1.95643	2.41105	2.1175	2.14435	22.827	0	0	0.089135	0.73521	0.819431	2.16072
MAG250	0.9507	d__Archaea;p__Thermoproteota;c__Nitrososphaeria;o__Nitrososphaerales;f__Nitrososphaeraceae;g__TH1177;s__Unclassified	1.43829	1.18916	1.20873	1.19995	1.24923	1.33663	0.635111	0.733906	0.875786	0	0	0	0.2448	0.206824	0.114942	0.0624266	0	0.27289	0	0	0	0	0	0	0	0	0	0	0	0	0	0	0	0	0	0	10.7687	1.09631	0	0.150314	0	0	0
MAG251	0.6307	d__Bacteria;p__Pseudomonadota;c__Gammaproteobacteria;o__Pseudomonadales;f__Halieaceae;g__Halioglobus;s__Unclassified	0.232853	0.275224	0.384566	0.452705	0.413306	0.549256	0.29927	0.310982	0.294899	0	0	0	0.057566	0	0	0	0	0	0.194119	0.2021	0.0932634	0.22812	0.285702	0.231514	2.47939	3.08809	2.90334	1.63618	1.91939	1.86308	0	0	0	0	0	0	18.3949	0.357007	0	0.00959434	0.205803	2.31491	0
MAG252	0.5482	d__Bacteria;p__Pseudomonadota;c__Gammaproteobacteria;o__Woeseiales;f__Woeseiaceae;g__UBA1847;s__Unclassified	0	0	0	0	0	0	0	0	0	0	0	0	0	0	0	0	0	0	0.874905	0.542355	0.511513	1.72861	6.496	11.5969	0	0	0	0	0	0	0	0	0	0	0	0	21.7502	0	0	0	3.62504	0	0
MAG253	0.72	d__Bacteria;p__Acidobacteriota;c__Thermoanaerobaculia;o__Thermoanaerobaculales;f__Sulfomarinibacteraceae;g__Unclassified;s__Unclassified	0	0	0	0	0	0	0	0	0	0	0	0	0	0	0	0	0	0	0	0	0	0	0	0	0.392571	0	0.0846131	3.83773	0.979825	1.88036	0	0	0	0	0	0	7.1751	0	0	0	0	1.19585	0
MAG254	0.5717	d__Bacteria;p__Chloroflexota;c__Anaerolineae;o__Promineofilales;f__Promineofilaceae;g__UBA11865;s__Unclassified	1.88038	1.34697	1.2603	1.10663	1.10372	1.19919	0.545975	0.549489	0.520616	0	0	0	0.463239	0.60535	0.4236	0.0701416	0	0.160948	0	0	0	0	0	0	0	0	0	0	0	0	0	0	0	0	0	0	11.2366	1.05703	0	0.287213	0	0	0
MAG255	0.5431	d__Bacteria;p__Actinomycetota;c__Acidimicrobiia;o__Acidimicrobiales;f__Ilumatobacteraceae;g__Ilumatobacter;s__Unclassified	0	0	0	0	0	0	0	0	0	0	0	0	0.127646	0.169038	0.177584	0.125862	0	0.131275	0.362218	0.371793	0.610196	0.465469	0.39678	0.293158	0.0513514	0	0.0451454	0.028656	0.0912007	0.0428953	1.00579	1.11509	1.13984	1.22355	0.971453	1.01074	9.95673	0	0	0.121901	0.416602	0.0432082	1.07774
MAG256	0.773	d__Bacteria;p__Pseudomonadota;c__Gammaproteobacteria;o__XN24;f__XN24;g__Unclassified;s__Unclassified	0	0	0	0	0	0	0	0	0	0	0	0	0	0	0	0	0	0	0	0	0	0	0	0	0	0	0	0	0	0	0.90594	1.34731	0.990471	0.430907	0.287577	0.868587	4.83079	0	0	0	0	0	0.805132
MAG257	0.7853	d__Bacteria;p__Actinomycetota;c__Actinomycetia;o__Jiangellales;f__Unclassified;g__Unclassified;s__Unclassified	0	0	0	0	0	0	0	0	0	0	0	0	0.0988319	0.275636	0.203766	0	0	0	0.842807	1.03163	0.918316	1.05505	0.530921	0.511706	1.19425	1.24046	1.27004	0.423045	0.686586	0.575536	2.43661	2.41664	2.16173	2.43577	2.62276	2.41477	25.3469	0	0	0.0963723	0.815072	0.898319	2.41471
MAG258	0.7982	d__Bacteria;p__Desulfobacterota;c__Desulfobulbia;o__Desulfobulbales;f__Desulfocapsaceae;g__JABDQA01;s__Unclassified	0	0	0	0	0	0	0	0	0	0	0	0	0	0	0	0	0	0	1.49504	1.44582	1.0837	2.51424	0.597472	1.81622	0.1866	0.243482	0.271532	0.0814361	0.153598	0.109688	0	0	0	0	0	0	9.99882	0	0	0	1.49208	0.174389	0
MAG259	0.67	d__Bacteria;p__Pseudomonadota;c__Alphaproteobacteria;o__Rhizobiales;f__Methyloligellaceae;g__Methyloceanibacter;s__Unclassified	0	0	0	0	0	0	0	0	0	0	0	0	0	0	0	0	0	0	0.903993	0.943451	1.07982	0.782919	0.802457	0.766294	0.746774	0.57932	0.581397	0.362657	0.598395	0.505253	0.14191	0.151939	0.145219	0.133632	0.13857	0.17633	9.54033	0	0	0	0.879822	0.562299	0.147933
MAG26	0.9067	d__Bacteria;p__Bacteroidota;c__Bacteroidia;o__Flavobacteriales;f__Flavobacteriaceae;g__Lutimonas;s__Unclassified	0	0	0	0	0	0	0	0	0	0	0	0	0	0	0	0	0	0	0	0	0	0	0	0	0	0	0	0	0	0	0.654272	0.581827	0.630598	0.527124	0.685991	0.992406	4.07222	0	0	0	0	0	0.678703
MAG260	0.7094	d__Bacteria;p__Pseudomonadota;c__Alphaproteobacteria;o__Rhizobiales;f__Methyloligellaceae;g__Methyloceanibacter;s__Unclassified	0	0	0	0	0.0667788	0	0	0	0	0	0	0	0	0	0	0	0	0	1.56937	2.03668	1.43597	1.36992	2.26257	1.8406	2.19536	2.15529	2.19745	1.51014	1.71226	1.75333	0.247575	0.244336	0.2602	0.200948	0.19324	0.241051	23.4931	0.00741986	0	0	1.75252	1.92064	0.231225
MAG261	0.7665	d__Bacteria;p__Bacteroidota;c__Bacteroidia;o__Flavobacteriales;f__Flavobacteriaceae;g__Flavobacterium;s__Unclassified	0.50873	0.421884	0.503065	0.790953	1.46896	1.10714	0.595451	0.633131	1.34395	0	0	0	1.02203	0.261993	0.713855	0.376006	0	0	0	0	0	0	0	0	0	0	0	0	0	0	0	0	0	0	0	0	9.74715	0.819252	0	0.395648	0	0	0
MAG262	0.8834	d__Bacteria;p__Actinomycetota;c__Acidimicrobiia;o__UBA5794;f__ZC4RG35;g__Unclassified;s__Unclassified	0.101381	0.0987543	0.156611	0.160759	0.0858024	0.274808	0.0852806	0.0769338	0.0669753	0.163967	0.227268	0.141016	1.3229	2.0073	2.05083	0.625314	0.174678	0.545001	0	0	0	0	0	0	0	0	0	0	0	0	0.151811	0.153385	0.14813	0.148068	0.144236	0.154296	9.26552	0.123034	0.177417	1.12101	0	0	0.149988
MAG263	0.7219	d__Bacteria;p__Chloroflexota;c__Anaerolineae;o__Promineofilales;f__Promineofilaceae;g__Unclassified;s__Unclassified	0.207761	0.181052	0.264143	0.258043	0.120722	0.458319	0.156606	0.173265	0.146652	0.248572	0.390079	0.23035	1.51439	1.57347	2.73637	0.810292	0.846601	0.587489	0	0	0	0	0	0	0	0	0	0	0	0	0.960534	0.972378	0.962114	1.0806	1.05613	1.08021	17.0161	0.218507	0.289667	1.34477	0	0	1.01866
MAG264	0.507	d__Bacteria;p__Desulfobacterota_B;c__Binatia;o__DP-6;f__DP-6;g__Unclassified;s__Unclassified	2.49524	2.80463	2.26766	1.86079	1.93377	1.16521	3.37932	2.77874	1.76352	0	0	0	0.264638	0.309143	0.143663	0.329075	0	0.715775	0	0	0	0	0	0	0	0	0	0	0	0	0	0	0	0	0	0	22.2112	2.2721	0	0.293715	0	0	0
MAG265	0.9276	d__Bacteria;p__Cyanobacteriota;c__Cyanobacteriia;o__Cyanobacteriales;f__Xenococcaceae;g__Waterburya;s__Unclassified	0	0	0	0	0	0	0	0	0	0	0	0	0	0	0	0	0	0	0.454361	0.680765	0.0707112	6.67499	0.251689	0.604089	0	0	0	0	0	0	0	0	0	0	0	0	8.73661	0	0	0	1.4561	0	0
MAG266	0.5674	d__Bacteria;p__Pseudomonadota;c__Gammaproteobacteria;o__Steroidobacterales;f__Steroidobacteraceae;g__Unclassified;s__Unclassified	0	0	0	0	0	0	0	0	0	0.220784	0.192859	0.197863	0.139239	0.216996	0.175492	0.123768	0	0	0	0	0	0	0	0	0.0567309	0.0416314	0.0466039	0.0501584	0.0920186	0.0927124	1.51467	1.64123	1.56323	1.78514	1.38632	1.43037	10.9678	0	0.203835	0.109249	0	0.0633093	1.55349
MAG267	0.8627	d__Bacteria;p__Desulfobacterota;c__Desulfobacteria;o__Desulfobacterales;f__UBA11574;g__UBA11574;s__Unclassified	0	0	0	0	0	0	0	0	0	0	0	0	0	0	0	0	0	0	0	0	0	0	0	0	0.305814	0.256661	0.247978	1.13126	0.36132	0.944747	0	0	0	0	0	0	3.24778	0	0	0	0	0.541297	0
MAG268	0.8141	d__Bacteria;p__Pseudomonadota;c__Gammaproteobacteria;o__UBA9214;f__UBA9214;g__UBA9214;s__Unclassified	0	0	0	0	0	0	0	0	0	0.0483004	0	0	0.14357	0.210368	0.238578	0	0	0	0.925222	0.942274	0.811825	0.334019	0.498467	0.409995	0.526889	0.481871	0.503539	0.122963	0.236192	0.155859	1.19008	1.62117	1.23069	0.65607	0.401313	1.20567	12.8949	0	0.0161001	0.0987525	0.653634	0.337886	1.05083
MAG269	0.6889	d__Bacteria;p__Acidobacteriota;c__Thermoanaerobaculia;o__Thermoanaerobaculales;f__Sulfomarinibacteraceae;g__JANTFG01;s__Unclassified	0	0	0	0	0	0	0	0	0	0	0	0	0	0	0	0	0	0	0	0	0	0	0	0	0.0548028	0	0	1.38327	0.321183	0.411745	0	0	0	0	0	0	2.171	0	0	0	0	0.361833	0
MAG27	0.7145	d__Bacteria;p__Chloroflexota;c__Anaerolineae;o__Anaerolineales;f__UBA4823;g__PFL25;s__Unclassified	1.13764	1.22528	1.51546	1.90432	1.60716	1.95476	0.987468	1.21937	1.47172	0	0	0	0.151674	0.121727	0	0.122395	0	0.525667	0	0	0	0	0	0	0	0	0	0	0	0	0	0	0	0	0	0	13.9446	1.44702	0	0.153577	0	0	0
MAG270	0.6081	d__Bacteria;p__Pseudomonadota;c__Gammaproteobacteria;o__Competibacterales;f__Competibacteraceae;g__Unclassified;s__Unclassified	0	0	0	0	0	0	0	0	0	0	0	0	0	0	0	0	0	0	0.529476	0.453807	0.188151	2.62907	0.192659	0.261749	0	0	0	0	0	0	0	0	0	0	0	0	4.25491	0	0	0	0.709152	0	0
MAG271	0.7049	d__Bacteria;p__Pseudomonadota;c__Gammaproteobacteria;o__UBA9214;f__UBA9214;g__UBA9214;s__Unclassified	0.0876244	0	0.128447	0.189735	0.133519	0.412017	0.198751	0.284726	0.30449	2.29247	2.67483	3.11429	0.397146	0.715998	0.794325	0	0	0.233491	0	0	0	0	0	0	0	0	0	0	0	0	0.584785	0.733823	0.625395	0.381366	0.241011	0.640054	15.1683	0.193257	2.69386	0.356827	0	0	0.534406
MAG272	0.5276	d__Bacteria;p__Nitrospirota;c__Nitrospiria;o__Nitrospirales;f__UBA8639;g__UBA8639;s__Unclassified	3.19468	2.41457	1.88948	1.79078	1.82271	1.35613	1.67957	1.79203	1.57577	0	0	0	0.337949	0.474225	0.3209	0.159128	0	0.469568	0	0	0	0	0.214707	0.271113	0	0	0	0	0	0	0	0	0	0	0	0	19.7633	1.94619	0	0.293629	0.0809699	0	0
MAG273	0.8336	d__Bacteria;p__Pseudomonadota;c__Gammaproteobacteria;o__UBA9214;f__UBA9214;g__Unclassified;s__Unclassified	0	0	0	0	0	0	0	0	0	0.0546661	0	0	0.153177	0.219832	0.238142	0	0	0	0.876229	0.907879	0.778882	0.321145	0.491584	0.408419	0.524117	0.457315	0.484573	0.117052	0.235049	0.158833	1.16255	1.34884	1.21816	0.658927	0.411994	1.4279	12.6553	0	0.018222	0.101858	0.63069	0.32949	1.03806
MAG274	0.8786	d__Bacteria;p__Actinomycetota;c__Acidimicrobiia;o__UBA5794;f__ZC4RG35;g__Unclassified;s__Unclassified	0.101843	0.0997853	0.163156	0.163651	0.0854004	0.289726	0.0927981	0.0766629	0.0692003	0.164116	0.227208	0.14457	1.33854	1.60774	2.66438	0.647338	0.182558	0.569854	0	0	0	0	0	0	0	0	0	0	0	0	0.171309	0.172151	0.163846	0.161967	0.159013	0.172384	9.68919	0.126914	0.178631	1.1684	0	0	0.166778
MAG275	0.69	d__Bacteria;p__Bacteroidota;c__Bacteroidia;o__Flavobacteriales;f__Flavobacteriaceae;g__Robiginitalea;s__Unclassified	0	0	0	0	0	0	0	0	0	0	0	0	0	0	0	0	0	0	0.825099	0.772783	1.09268	0.436398	0.504318	0.460836	0.161562	0.100788	0.110697	0.15185	0.254397	0.175696	0	0	0	0	0	0	5.0471	0	0	0	0.682019	0.159165	0
MAG276	0.6126	d__Bacteria;p__Pseudomonadota;c__Gammaproteobacteria;o__Steroidobacterales;f__Steroidobacteraceae;g__Unclassified;s__Unclassified	0	0	0	0	0	0	0	0	0	0.202882	0.136044	0.164146	0.144883	0.272518	0.22313	0	0	0	0	0	0	0	0	0	0.0697804	0.0539287	0.0591974	0.0594656	0.10979	0.103522	1.4249	1.5221	1.65194	1.51287	1.29277	1.31443	10.3183	0	0.167691	0.106755	0	0.0759474	1.45317
MAG277	0.7296	d__Bacteria;p__Desulfobacterota;c__Desulfobulbia;o__Desulfobulbales;f__Desulfocapsaceae;g__JABDQA01;s__Unclassified	0	0	0	0	0	0	0	0	0	0	0	0	0	0	0	0	0	0	1.88256	1.19825	0.875633	1.56493	0.499295	1.40491	0.146534	0.184618	0.214861	0.0635852	0.127447	0.0903264	0	0	0	0	0	0	8.25295	0	0	0	1.2376	0.137895	0
MAG278	0.6462	d__Bacteria;p__Chloroflexota;c__Anaerolineae;o__Anaerolineales;f__UBA4823;g__PFL25;s__Unclassified	1.12424	1.20271	1.4649	1.6062	1.55944	2.16172	0.963546	1.17497	1.44777	0	0	0	0.158049	0.124936	0	0.117393	0	0.524944	0	0	0	0	0	0	0	0	0	0	0	0	0	0	0	0	0	0	13.6308	1.41172	0	0.15422	0	0	0
MAG279	0.6205	d__Bacteria;p__Pseudomonadota;c__Gammaproteobacteria;o__Burkholderiales;f__Nitrosomonadaceae;g__Nitrosomonas;s__Nitrosomonas sp024235735	0	0	0	0	0	0	0	0	0	0	0	0	0.178739	0.258196	0.253634	1.82552	3.50825	0.648473	0	0	0	0	0	0	0	0	0	0	0	0	0	0	0	0	0	0	6.67281	0	0	1.11214	0	0	0
MAG28	0.627	d__Bacteria;p__Pseudomonadota;c__Gammaproteobacteria;o__Chromatiales;f__Sedimenticolaceae;g__Sva-25;s__Unclassified	0	0	0	0	0	0	0	0	0	0	0	0	0	0	0	0	0	0	0	0	0	0	0	0	1.03464	1.70088	1.64625	0.141848	0.15991	0.148312	0	0	0	0	0	0	4.83184	0	0	0	0	0.805307	0
MAG280	0.6293	d__Bacteria;p__Desulfobacterota;c__Desulfobulbia;o__Desulfobulbales;f__Desulfocapsaceae;g__JABDQA01;s__Unclassified	0	0	0	0	0	0	0	0	0	0	0	0	0	0	0	0	0	0	1.26327	1.8722	0.915312	1.46276	0.543195	1.29248	0.179254	0.212743	0.23529	0.0768036	0.143175	0.107539	0	0	0	0	0	0	8.30403	0	0	0	1.22487	0.159134	0
MAG281	0.6601	d__Bacteria;p__Chloroflexota;c__Anaerolineae;o__Anaerolineales;f__UBA11858;g__B10-G9;s__Unclassified	0	0	0	0	0	0	0	0	0	0	0	0	0	0	0	0	0	0	0	0	0	0	0	0	0.696988	0.196159	0.196798	0.992228	0.602881	1.56027	0	0	0	0	0	0	4.24533	0	0	0	0	0.707555	0
MAG282	0.8459	d__Bacteria;p__Actinomycetota;c__Actinomycetia;o__Actinomycetales;f__Dermatophilaceae;g__Phycicoccus;s__Unclassified	0	0	0	0	0	0	0	0	0	0	0	0	0	0	0	0	0	0	0.110489	0.138724	0.141763	0.247463	0.142919	0.135507	0.850238	1.12228	1.40899	0.468328	0.715245	0.649678	0.0567883	0	0	0.0676216	0.0847412	0	6.34078	0	0	0	0.152811	0.869127	0.0348585
MAG283	0.8083	d__Bacteria;p__Actinomycetota;c__Acidimicrobiia;o__UBA5794;f__ZC4RG35;g__SZUA-217;s__Unclassified	1.41407	1.63434	1.75701	1.75712	1.53335	1.43944	2.74403	2.34822	1.53999	0.169794	0.134415	0.180899	1.04089	1.0844	0.656051	0.346228	0	0.481967	0	0	0	0	0	0	0	0	0	0	0	0	0	0	0	0	0	0	20.2622	1.7964	0.161702	0.601589	0	0	0
MAG29	0.8056	d__Bacteria;p__Desulfobacterota;c__Desulfobulbia;o__Desulfobulbales;f__Desulfocapsaceae;g__JABDQA01;s__Unclassified	0	0	0	0	0	0	0	0	0	0	0	0	0	0	0	0	0	0	0.27638	0.250411	0.20687	0.137188	0.440922	0.39188	0.746914	0.879951	0.852434	0.451859	1.15274	0.657459	0	0	0	0	0	0	6.44501	0	0	0	0.283942	0.790226	0
MAG3	0.5281	d__Bacteria;p__Chloroflexota;c__Anaerolineae;o__Promineofilales;f__Promineofilaceae;g__JAKEFB01;s__Unclassified	0.0914357	0	0.105087	0.0929776	0.0716616	0.160556	0	0	0	0.177756	0.233616	0.181861	1.51799	1.77874	2.06044	0.834106	0.698582	0.722349	0	0	0	0	0	0	0	0	0	0	0	0	0.109813	0.115958	0.116043	0.116656	0.124133	0.128735	9.4385	0.0579687	0.197745	1.2687	0	0	0.118556
MAG30	0.573	d__Bacteria;p__Chloroflexota;c__Anaerolineae;o__Anaerolineales;f__UBA4823;g__DSOS01;s__Unclassified	0.863738	1.46521	1.2039	1.17407	1.01518	1.39306	0.952826	1.06133	0.946001	0	0	0	0.403196	0.384732	0.170518	0.159813	0	0.624288	0	0	0.0799202	0	0	0.117746	0	0	0	0	0	0	0	0	0	0	0	0	12.0155	1.11948	0	0.290424	0.0329443	0	0
MAG31	0.8597	d__Bacteria;p__Bacteroidota;c__Bacteroidia;o__Chitinophagales;f__Saprospiraceae;g__Unclassified;s__Unclassified	0	0	0	0	0	0	0	0	0	0	0	0	0.335094	0.293258	0.215668	1.34264	1.26119	1.49432	0	0	0	0	0	0	0	0	0	0	0	0	0	0	0	0	0	0	4.94217	0	0	0.823696	0	0	0
MAG32	0.6241	d__Bacteria;p__Pseudomonadota;c__Gammaproteobacteria;o__Chromatiales;f__Chromatiaceae;g__Thiohalocapsa;s__Unclassified	0	0	0	0	0	0	0	0	0	0	0	0	0	0	0	0	0	0	0.674703	0.788445	0.620871	0.381826	0.526833	0.461232	1.62432	1.60441	1.54937	0.887853	1.24597	1.18819	0	0	0	0	0	0	11.554	0	0	0	0.575652	1.35002	0
MAG33	0.8591	d__Bacteria;p__Actinomycetota;c__Actinomycetia;o__Jiangellales;f__Unclassified;g__Unclassified;s__Unclassified	0	0	0	0	0	0	0	0	0	0	0	0	0	0	0	0	0	0	1.7257	2.17183	1.9099	2.41515	1.60132	1.39773	1.0276	1.40101	1.34177	0.859904	1.85422	1.05568	0	0	0	0	0	0	18.7618	0	0	0	1.87027	1.2567	0
MAG34	0.8099	d__Bacteria;p__Actinomycetota;c__Acidimicrobiia;o__Acidimicrobiales;f__Ilumatobacteraceae;g__Ilumatobacter;s__Unclassified	0	0	0	0	0	0	0	0	0	0	0	0	0.128604	0.178387	0.178731	0.119084	0	0.130847	0.440815	0.456832	0.732508	0.573093	0.482226	0.3365	0.069251	0.0545042	0.0623324	0.0385741	0.111447	0.0578521	1.24783	1.34322	1.38624	1.15216	1.20239	1.63547	12.1189	0	0	0.122609	0.503662	0.0656602	1.32788
MAG35	0.6105	d__Bacteria;p__Pseudomonadota;c__Alphaproteobacteria;o__Sphingomonadales;f__Sphingomonadaceae;g__Erythrobacter;s__Unclassified	0	0	0	0	0	0	0	0	0	0	0	0	0.113213	0.134411	0.156212	1.37061	1.71238	0.821739	0	0	0	0	0	0	0	0	0	0	0	0	0	0	0	0	0	0	4.30857	0	0	0.718094	0	0	0
MAG36	0.7292	d__Bacteria;p__Actinomycetota;c__Actinomycetia;o__Mycobacteriales;f__Mycobacteriaceae;g__Mycobacterium;s__Unclassified	0	0	0	0	0	0	0	0	0	0	0	0	0	0	0	0	0	0	0	0	0	0	0	0	0	0	0	0	0	0	1.66376	1.77882	2.18003	2.47816	2.91039	1.7718	12.783	0	0	0	0	0	2.13049
MAG37	0.8769	d__Bacteria;p__Bacteroidota;c__Bacteroidia;o__Flavobacteriales;f__Flavobacteriaceae;g__Robiginitalea;s__Unclassified	0	0	0	0	0	0	0	0	0	0	0	0	0	0	0	0	0	0	0.823565	0.761765	0.457996	0.568974	0.540461	0.572196	0.214221	0.127039	0.138932	0.209685	0.582934	0.234797	0	0	0	0	0	0	5.23257	0	0	0	0.620826	0.251268	0
MAG38	0.8953	d__Bacteria;p__Bacteroidota;c__Bacteroidia;o__Flavobacteriales;f__Flavobacteriaceae;g__Lutimonas;s__Unclassified	0	0	0	0	0	0	0	0	0	0	0	0	0	0	0	0	0	0	0	0	0.068981	0	0	0	0.0335013	0	0	0	0	0	0.965687	0.591707	0.640924	0.550196	0.692719	0.689477	4.23319	0	0	0	0.0114968	0.00558355	0.688452
MAG39	0.9515	d__Archaea;p__Thermoproteota;c__Nitrososphaeria;o__Nitrososphaerales;f__Nitrososphaeraceae;g__TH5896;s__Unclassified	3.32639	2.26953	1.74307	0.967788	1.04732	0.596548	1.18068	1.06945	0.969522	0	0	0	0.498355	0.364722	0.195508	0.194751	0	0.230526	0	0	0	0	0	0	0	0	0	0	0	0	0	0	0	0	0	0	14.6542	1.46337	0	0.24731	0	0	0
MAG4	0.6944	d__Archaea;p__Halobacteriota;c__Methanosarcinia;o__Methanosarcinales;f__Methanosarcinaceae;g__Methanosarcina;s__Unclassified	0	0	0	0.0656604	0.0697302	0.110628	0	0	0	0.0814843	0.100596	0.109215	0.259513	0.222918	0.165026	1.38391	1.60935	1.62085	0	0	0	0	0	0	0	0	0	0	0	0	0	0	0	0	0	0	5.79888	0.0273354	0.0970984	0.876928	0	0	0
MAG40	0.6968	d__Bacteria;p__Pseudomonadota;c__Gammaproteobacteria;o__Woeseiales;f__Woeseiaceae;g__UBA1847;s__Unclassified	0	0	0	0	0	0	0	0	0	0	0	0	0	0	0	0	0	0	0.496669	0.508902	0.45698	0.50799	0.524069	0.456424	1.04196	1.35118	1.22923	0.761707	1.37269	0.960168	0	0	0	0	0	0	9.66797	0	0	0	0.491839	1.11949	0
MAG41	0.7214	d__Bacteria;p__Pseudomonadota;c__Gammaproteobacteria;o__UBA9214;f__UBA9214;g__Unclassified;s__Unclassified	0	0	0	0	0	0	0	0	0	0	0	0	0.130765	0.193225	0.216255	0	0	0	0.676815	0.725124	0.620253	0.252841	0.380843	0.316899	0.408991	0.364051	0.388343	0.0945259	0.186831	0.129866	0.952578	1.0989	0.980644	0.847812	0.327761	0.956526	10.2499	0	0	0.0900407	0.495462	0.262101	0.860704
MAG42	0.8942	d__Bacteria;p__Pseudomonadota;c__Gammaproteobacteria;o__Burkholderiales;f__Burkholderiaceae_A;g__JADJWR01;s__JADJWR01 sp020355165	0	0	0.082576	0.12833	0.148122	0.171672	0.193906	0.255512	0.277653	5.71379	4.45513	5.39765	0.153118	0.122902	0.145739	0	0	0	0	0	0	0	0	0	0	0	0	0	0	0	0	0	0	0	0	0	17.2461	0.139752	5.18886	0.0702931	0	0	0
MAG43	0.5432	d__Bacteria;p__Actinomycetota;c__Acidimicrobiia;o__Acidimicrobiales;f__Microtrichaceae;g__JAAEPF01;s__Unclassified	0.103741	0.0951164	0.141517	0.130175	0.107481	0.185615	0	0.0693655	0	0	0	0	0.312027	0.342766	0.379863	0.11392	0	0.10009	2.35707	2.00406	2.42178	2.34928	1.33729	1.42111	1.20948	1.26745	1.2805	0.609956	1.37564	0.899532	0.979429	0.98326	0.945637	0.847917	0.920872	0.969228	26.2612	0.0925568	0	0.208111	1.98177	1.10709	0.941057
MAG44	0.5715	d__Bacteria;p__Actinomycetota;c__UBA4738;o__UBA4738;f__HRBIN12;g__Unclassified;s__Unclassified	0	0	0	0.0747504	0.102087	0.0877703	0.109162	0.14788	0.144254	2.21958	2.6469	2.01913	0.0553852	0	0	0	0	0	0	0	0	0	0	0	0	0	0	0	0	0	0	0	0	0	0	0	7.6069	0.0739894	2.2952	0.00923086	0	0	0
MAG45	0.5657	d__Bacteria;p__Bacteroidota;c__Bacteroidia;o__Flavobacteriales;f__Flavobacteriaceae;g__Robiginitalea;s__Unclassified	0	0	0	0	0	0	0	0	0	0	0	0	0	0	0	0	0	0	0.602872	0.562372	0.337479	0.424659	0.397774	0.440663	0.406249	0.107318	0.119482	0.163879	0.274301	0.189916	0	0	0	0	0	0	4.02696	0	0	0	0.46097	0.210191	0
MAG46	0.6122	d__Bacteria;p__Pseudomonadota;c__Gammaproteobacteria;o__Pseudomonadales;f__Halieaceae;g__Halioglobus;s__Unclassified	0	0	0	0	0	0	0	0	0	0	0	0	0.05845	0.153342	0.169314	0	0.122969	0	0.582251	0.603166	1.30783	0.297646	0.396549	0.460086	0.0633227	0.0511941	0.0599044	0.027694	0.092173	0.0309706	1.52445	1.3983	1.8756	0.781583	0.571514	0.980628	11.6089	0	0	0.0840127	0.607921	0.0542098	1.18868
MAG47	0.5755	d__Bacteria;p__Pseudomonadota;c__Gammaproteobacteria;o__Steroidobacterales;f__Steroidobacteraceae;g__Unclassified;s__Unclassified	0	0	0	0	0	0	0	0	0	0.182975	0.123838	0.147494	0.105989	0.204368	0.150241	0	0	0	0	0	0	0	0	0	0.0541004	0.0391275	0.0415459	0.0480592	0.0895462	0.0883819	1.38927	1.49715	1.44508	1.44944	1.40408	1.28812	9.74881	0	0.151436	0.0767664	0	0.0601268	1.41219
MAG48	0.7902	d__Bacteria;p__Bacteroidota;c__Bacteroidia;o__Flavobacteriales;f__Flavobacteriaceae;g__Robiginitalea;s__Unclassified	0	0	0	0	0	0	0	0	0	0	0	0	0	0	0	0	0	0	0.726501	0.677802	0.414621	0.50987	0.464536	0.523732	0.195431	0.114384	0.127026	0.375745	0.325288	0.216077	0	0	0	0	0	0	4.67101	0	0	0	0.552844	0.225659	0
MAG49	0.7351	d__Bacteria;p__Pseudomonadota;c__Gammaproteobacteria;o__Chromatiales;f__Sedimenticolaceae;g__Unclassified;s__Unclassified	0	0	0	0	0	0	0	0	0	0	0	0	0	0	0	0	0	0	0	0	0	0.112191	0	0	0.936564	0.903534	0.984497	0.98914	0.932368	0.748685	0	0	0	0	0	0	5.60698	0	0	0	0.0186984	0.915798	0
MAG5	0.7148	d__Bacteria;p__Gemmatimonadota;c__Gemmatimonadetes;o__Longimicrobiales;f__UBA6960;g__Unclassified;s__Unclassified	0	0	0	0	0	0	0	0	0	0	0	0	0	0	0	0	0	0	0	0	0	0	0.150997	0	0.0879065	0	0	0.965446	0.865331	0.601474	0	0	0	0	0	0	2.67115	0	0	0	0.0251661	0.420026	0
MAG50	0.8326	d__Archaea;p__Thermoproteota;c__Nitrososphaeria;o__Nitrososphaerales;f__Nitrososphaeraceae;g__TH5896;s__Unclassified	2.34603	2.68139	1.51064	0.887452	0.923327	0.585431	0.998874	0.929963	0.835489	0	0	0	0.424729	0.313883	0.166306	0.159996	0	0.22409	0	0	0	0	0	0	0	0	0	0	0	0	0	0	0	0	0	0	12.9876	1.29984	0	0.214834	0	0	0
MAG51	0.768	d__Bacteria;p__Pseudomonadota;c__Gammaproteobacteria;o__XN24;f__XN24;g__Unclassified;s__Unclassified	0	0	0	0	0	0	0	0	0	0	0	0	0	0	0	0	0	0	0	0	0	0	0	0	0	0	0	0	0	0	1.28606	1.00338	1.00514	0.489859	0.346863	0.914841	5.04614	0	0	0	0	0	0.841024
MAG52	0.7395	d__Bacteria;p__Bacteroidota;c__Bacteroidia;o__Flavobacteriales;f__Flavobacteriaceae;g__Robiginitalea;s__Unclassified	0	0	0	0	0	0	0	0	0	0	0	0	0	0	0	0	0	0	0.753962	0.70012	0.432221	0.953194	0.492961	0.53015	0.18871	0.112269	0.123378	0.190037	0.323132	0.207178	0	0	0	0	0	0	5.00731	0	0	0	0.643768	0.190784	0
MAG53	0.9006	d__Bacteria;p__Bacteroidota;c__Bacteroidia;o__Flavobacteriales;f__Flavobacteriaceae;g__Lutimonas;s__Unclassified	0	0	0	0	0	0	0	0	0	0	0	0	0	0	0	0	0	0	0	0	0	0	0	0	0	0	0	0	0	0	0.634833	0.562418	0.931608	0.517468	0.668479	0.668203	3.98301	0	0	0	0	0	0.663835
MAG54	0.7364	d__Bacteria;p__Actinomycetota;c__Acidimicrobiia;o__Acidimicrobiales;f__Microtrichaceae;g__JAAEPF01;s__Unclassified	0.171508	0.15956	0.22779	0.202491	0.177038	0.299221	0.0989943	0.10458	0.115074	0	0	0	0.619643	0.625888	0.714236	0.177834	0.065077	0.165711	1.50176	1.86091	2.18983	2.33508	1.3213	1.56074	1.33364	1.37494	1.39365	0.625407	1.53127	0.928326	1.46372	1.50908	1.42665	1.64808	1.3651	1.53076	30.8249	0.172917	0	0.394731	1.79494	1.19787	1.49057
MAG55	0.7905	d__Bacteria;p__Desulfobacterota;c__Syntrophobacteria;o__BM002;f__BM002;g__BM002;s__Unclassified	0	0	0	0	0	0	0	0	0	0	0	0	0	0	0	0	0	0	3.19936	3.48546	1.79245	0.796292	1.13477	0.39949	0.14276	0.14427	0.142502	0	0.0509	0.0416605	0.134944	0.172218	0.147486	0.103546	0.108957	0.18314	12.1802	0	0	0	1.8013	0.0870155	0.141715
MAG56	0.6086	d__Bacteria;p__Planctomycetota;c__Planctomycetia;o__Pirellulales;f__Pirellulaceae;g__JAGQPK01;s__Unclassified	0.154186	0.12225	0.182854	0.169684	0.157886	0.306032	0.0852271	0.101529	0.0899162	0	0.0802901	0	0.394244	0.640047	0.546917	0.401009	0.361972	0.401972	0.09111	0.101922	0	0.14154	0	0	0.0898894	0.0801868	0.0843341	0.0464685	0.0935691	0.06629	0.783524	0.848298	0.899618	0.914245	1.1923	0.889009	10.5183	0.152174	0.0267634	0.457693	0.055762	0.0767897	0.921165
MAG57	0.9004	d__Bacteria;p__Bacteroidota;c__Bacteroidia;o__Flavobacteriales;f__Flavobacteriaceae;g__Lutimonas;s__Unclassified	0	0	0	0	0	0	0	0	0	0	0	0	0	0	0	0	0	0	0	0	0	0	0	0	0	0	0	0	0	0	0.624483	0.896966	0.601862	0.50587	0.653172	0.649931	3.93229	0	0	0	0	0	0.655381
MAG58	0.7199	d__Bacteria;p__Bacteroidota;c__Bacteroidia;o__Flavobacteriales;f__Flavobacteriaceae;g__HKST-UBA85;s__Unclassified	0	0	0	0	0	0	0	0	0	0.104021	0.139247	0.174734	2.29216	2.20112	2.24097	5.80887	8.13966	3.59036	0	0	0	0	0	0	0	0	0	0	0	0	0	0	0	0	0	0	24.6911	0	0.139334	4.04552	0	0	0
MAG59	0.6785	d__Bacteria;p__Acidobacteriota;c__Thermoanaerobaculia;o__Thermoanaerobaculales;f__Unclassified;g__Unclassified;s__Unclassified	0	0	0	0	0	0	0	0	0	0	0	0	0	0	0	0	0	0	0	0	0	0	0	0	0.412607	0	0	3.54835	0.912409	1.65829	0	0	0	0	0	0	6.53166	0	0	0	0	1.08861	0
MAG6	0.6727	d__Bacteria;p__Chloroflexota;c__Anaerolineae;o__Anaerolineales;f__UBA4823;g__PFL25;s__Unclassified	1.26132	1.35882	1.66136	1.80958	1.7589	2.12234	1.45624	1.3616	1.65931	0	0	0	0.188815	0.146483	0	0.133641	0	0.59671	0	0	0	0	0	0	0	0	0	0	0	0	0	0	0	0	0	0	15.5151	1.6055	0	0.177608	0	0	0
MAG60	0.5967	d__Bacteria;p__Desulfobacterota;c__Desulfobulbia;o__Desulfobulbales;f__Desulfocapsaceae;g__JABDQA01;s__Unclassified	0	0	0	0	0	0	0	0	0	0	0	0	0	0	0	0	0	0	0.981795	0.927571	1.30884	1.30825	0.378239	1.17012	0.105263	0.139078	0.16143	0.0515004	0.0929126	0.068299	0	0	0	0	0	0	6.6933	0	0	0	1.01247	0.10308	0
MAG61	0.8378	d__Bacteria;p__Pseudomonadota;c__Gammaproteobacteria;o__Woeseiales;f__Woeseiaceae;g__JAACFE01;s__Unclassified	0.258891	0.219443	0.225	0.205342	0.178617	0.361725	0.165086	0.172	0.145956	0.346162	0.499785	0.365076	0.857221	0.860787	1.03118	4.11911	3.62068	1.36912	0	0	0	0	0	0	0	0	0	0	0	0	0	0	0	0	0	0	15.0012	0.214673	0.403674	1.97635	0	0	0
MAG62	0.6952	d__Bacteria;p__Chloroflexota;c__Anaerolineae;o__Anaerolineales;f__UBA4823;g__PFL25;s__Unclassified	1.18092	1.27273	1.56628	1.71383	1.91819	1.97947	1.07074	1.27265	1.5596	0	0	0	0.171113	0.144644	0	0.129422	0	0.550864	0	0	0	0	0	0	0	0	0	0	0	0	0	0	0	0	0	0	14.5304	1.50382	0	0.166007	0	0	0
MAG63	0.7697	d__Bacteria;p__Desulfobacterota;c__Desulfobulbia;o__Desulfobulbales;f__Desulfocapsaceae;g__JABDQA01;s__Unclassified	0	0	0	0	0	0	0	0	0	0	0	0	0	0	0	0	0	0	0.300773	0.275945	0.220952	0.166761	0.46978	0.430986	0.788494	0.924631	0.881966	0.44542	0.885411	0.872818	0	0	0	0	0	0	6.66394	0	0	0	0.310866	0.79979	0
MAG64	0.6267	d__Bacteria;p__Bacteroidota;c__Bacteroidia;o__Bacteroidales;f__VadinHA17;g__SR-FBR-E99;s__SR-FBR-E99 sp006227095	0	0	0	0	0	0	0	0	0	0.0874918	0.150592	0.109809	0.329835	0.23869	0.25506	1.64555	2.06146	0.802988	0	0	0	0	0	0	0	0	0	0	0	0	0.0708288	0.0736535	0.0684149	0.0743799	0.0551435	0.0782111	6.10211	0	0.115964	0.888931	0	0	0.0701053
MAG65	0.5269	d__Bacteria;p__Bacteroidota;c__Bacteroidia;o__Bacteroidales;f__Prolixibacteraceae;g__Draconibacterium;s__Unclassified	0	0	0	0	0	0	0	0	0	0	0	0	0	0	0	0	0	0	0	0	0	0	0	0	0.0975785	0.0809826	0.0689861	1.4	0.594375	0.850801	0	0	0	0	0	0	3.09273	0	0	0	0	0.515455	0
MAG66	0.9277	d__Bacteria;p__Planctomycetota;c__Planctomycetia;o__Pirellulales;f__Pirellulaceae;g__Rubripirellula;s__Unclassified	0	0	0	0	0	0	0	0	0	0.0507216	0.115298	0.0648327	0.355826	0.66471	0.500995	2.76528	1.57156	2.44302	0	0	0	0	0	0	0	0	0	0	0	0	0.188934	0.185318	0.182347	0.226866	0.254562	0.244971	9.81525	0	0.0769509	1.38357	0	0	0.213833
MAG67	0.5771	d__Bacteria;p__Pseudomonadota;c__Gammaproteobacteria;o__Steroidobacterales;f__Steroidobacteraceae;g__SG8-30;s__Unclassified	0	0	0	0	0	0	0	0	0	0.662903	0.664299	0.634111	4.92749	3.82599	4.35814	4.56126	3.33429	2.76505	0	0	0	0	0	0	0	0	0	0	0	0	0.2106	0.213258	0.213344	0.228915	0.197489	0.21149	27.0086	0	0.653771	3.96204	0	0	0.212516
MAG68	0.9173	d__Bacteria;p__Bacteroidota;c__Bacteroidia;o__Chitinophagales;f__Saprospiraceae;g__Unclassified;s__Unclassified	0	0	0	0	0	0	0	0	0	0	0	0	0.377653	0.316698	0.247238	1.14987	1.66342	1.61932	0	0	0	0	0	0	0	0	0	0	0	0	0	0	0	0	0	0	5.3742	0	0	0.8957	0	0	0
MAG69	0.7114	d__Bacteria;p__Chloroflexota;c__Anaerolineae;o__Anaerolineales;f__EnvOPS12;g__JAABUE01;s__Unclassified	1.55997	1.80107	1.84817	1.7128	1.2321	2.23231	2.15343	2.88995	2.22681	0	0	0	0.631671	1.12717	0.380625	0.398676	0	1.65168	0	0	0	0	0	0	0	0	0	0	0	0	0	0	0	0	0	0	21.8464	1.96185	0	0.698304	0	0	0
MAG7	0.919	d__Bacteria;p__Actinomycetota;c__Actinomycetia;o__Jiangellales;f__Unclassified;g__Unclassified;s__Unclassified	0	0	0	0	0	0	0	0	0	0	0	0	0	0	0	0	0	0	1.56615	1.95407	2.04924	2.17456	1.44828	1.2431	0.844107	1.20375	1.1261	0.790893	1.58289	0.938477	0	0	0	0	0.109109	0	17.0307	0	0	0	1.73923	1.08103	0.0181849
MAG70	0.8763	d__Bacteria;p__Pseudomonadota;c__Gammaproteobacteria;o__Burkholderiales;f__Burkholderiaceae_A;g__JADJWR01;s__JADJWR01 sp020355165	0	0	0.0721761	0.117247	0.136804	0.15334	0.174991	0.244808	0.252186	5.5524	4.09661	4.62208	0.13447	0.105207	0.129066	0	0	0	0	0	0	0	0	0	0	0	0	0	0	0	0	0	0	0	0	0	15.7914	0.12795	4.75703	0.0614573	0	0	0
MAG71	0.6291	d__Bacteria;p__Chloroflexota;c__Anaerolineae;o__Promineofilales;f__Promineofilaceae;g__UBA11865;s__Unclassified	1.25214	1.42194	1.32403	1.18937	1.80211	1.27498	0.453961	0.457415	0.444449	0	0	0	0.537374	0.715082	0.527582	0.0614672	0	0.138125	0	0	0	0	0	0	0	0	0	0	0	0	0	0	0	0	0	0	11.6	1.06893	0	0.329938	0	0	0
MAG72	0.7943	d__Bacteria;p__Actinomycetota;c__Actinomycetia;o__Nanopelagicales;f__GCA-2699445;g__Unclassified;s__Unclassified	0	0	0	0	0	0	0	0	0	0	0	0	0	0	0	0	0	0	0.883111	0.896059	2.48447	1.51043	0.324418	0.313751	0.0889351	0.0735391	0.0804486	0.0552507	0.146783	0.0888533	2.67809	2.60263	2.62809	2.93156	3.18341	2.52907	23.4989	0	0	0	1.06871	0.0889683	2.75881
MAG73	0.7957	d__Bacteria;p__Actinomycetota;c__Actinomycetia;o__Actinomycetales;f__Dermatophilaceae;g__Phycicoccus;s__Unclassified	0	0	0	0	0	0	0	0	0	0	0	0	0	0	0	0	0	0	0.0947298	0.124885	0.12627	0.230904	0.128139	0.124447	0.842026	1.33238	1.17672	0.462404	0.691936	0.626179	0.0505932	0	0	0.0609148	0.0737539	0	6.14629	0	0	0	0.138229	0.855275	0.030877
MAG74	0.6687	d__Bacteria;p__Bacteroidota;c__Bacteroidia;o__Flavobacteriales;f__Flavobacteriaceae;g__QXCW01;s__Unclassified	0	0	0	0	0	0	0	0	0	3.39545	1.90435	3.8702	0.976605	0.832123	0.66113	0.149651	0.285521	0	0	0	0	0	0	0	0	0	0	0	0	0	0	0	0	0	0	0	12.075	0	3.05666	0.484172	0	0	0
MAG75	0.8521	d__Bacteria;p__Chloroflexota;c__Anaerolineae;o__Anaerolineales;f__UBA4823;g__PFL25;s__Unclassified	0	0	0	0	0	0	0	0.0932328	0.0709053	2.52013	1.91063	2.13751	0	0	0	0	0	0	0	0	0	0	0	0	0	0	0	0	0	0	0	0	0	0	0	0	6.73241	0.0182376	2.18943	0	0	0	0
MAG76	0.8069	d__Bacteria;p__Gemmatimonadota;c__Gemmatimonadetes;o__KS3-K002;f__JABDQB01;g__Unclassified;s__Unclassified	0	0	0	0	0	0	0.0858009	0.117615	0.0730795	2.83423	1.48837	2.80826	0.0895298	0.0850245	0.0884355	0	0	0	0	0	0	0	0	0	0	0	0	0	0	0	0	0	0	0	0	0	7.67034	0.0307217	2.37695	0.0438316	0	0	0
MAG77	0.6874	d__Bacteria;p__Chloroflexota;c__Anaerolineae;o__Anaerolineales;f__DRKV01;g__JAGUYX01;s__Unclassified	0.328061	0.344435	0.43381	0.403168	0.248467	0.609131	0.237244	0.258055	0.256742	0.0998133	0.146906	0.12071	1.40208	2.7015	1.81522	1.48261	1.16857	1.45891	0	0	0	0	0	0	0.0516277	0	0	0	0	0.0332355	0.326669	0.341348	0.334795	0.371642	0.382734	0.397178	15.7547	0.346568	0.122476	1.67148	0	0.0141439	0.359061
MAG78	0.8957	d__Bacteria;p__Bacteroidota;c__Bacteroidia;o__Flavobacteriales;f__Flavobacteriaceae;g__Lutimonas;s__Unclassified	0	0	0	0	0	0	0	0	0	0	0	0	0	0	0	0	0	0	0	0	0.0705833	0	0	0	0.0328713	0	0	0	0	0	0.676753	0.601007	0.647153	0.544578	0.964742	0.702942	4.24063	0	0	0	0.0117639	0.00547855	0.689529
MAG79	0.789	d__Bacteria;p__Actinomycetota;c__Actinomycetia;o__Jiangellales;f__Unclassified;g__Unclassified;s__Unclassified	0	0	0	0	0	0	0	0	0	0	0	0	0	0	0	0	0	0	1.39895	1.76914	1.49184	1.94863	1.30202	1.12471	0.972328	1.33577	1.47644	0.804713	1.56117	0.983291	0	0	0	0	0	0	16.169	0	0	0	1.50588	1.18895	0
MAG8	0.823	d__Bacteria;p__Desulfobacterota;c__Desulfobacteria;o__Desulfobacterales;f__UBA11574;g__UBA11574;s__UBA11574 sp003486165	0	0	0.0998281	0.133473	0.0971974	0.195795	0.0792648	0.135195	0.116918	1.96595	1.94229	2.35558	0.16048	0.269253	0.298507	0	0	0.321702	0	0	0	0	0	0	0	0	0	0	0	0	0	0	0	0	0	0	8.17143	0.0952968	2.08794	0.17499	0	0	0
MAG80	0.8735	d__Bacteria;p__Pseudomonadota;c__Alphaproteobacteria;o__Rhizobiales;f__Methyloligellaceae;g__Methyloceanibacter;s__Unclassified	0.312888	0.309485	0.271675	0.231356	0.24011	0.205512	0.120086	0.112529	0.122541	0	0	0	0	0	0	0	0	0	1.75592	1.63138	1.57886	1.4048	3.39124	2.4572	2.43825	2.41304	2.45481	1.70561	1.87609	1.91971	0.233392	0.241374	0.252662	0.17141	0.170161	0.230889	28.253	0.21402	0	0	2.03657	2.13458	0.216648
MAG81	0.8213	d__Bacteria;p__Bacteroidota;c__Bacteroidia;o__Flavobacteriales;f__Flavobacteriaceae;g__Flavobacterium;s__Unclassified	0.533527	0.5052	0.603539	0.8516	1.01504	1.24139	0.682451	0.708556	2.03167	0	0	0	0.993218	0.262929	0.670447	0.367359	0	0	0	0	0	0	0	0	0	0	0	0	0	0	0	0	0	0	0	0	10.4669	0.908108	0	0.382326	0	0	0
MAG82	0.5215	d__Bacteria;p__Chloroflexota;c__Anaerolineae;o__JAAEKA01;f__JAAEKA01;g__JAAEKA01;s__Unclassified	0.0890114	0	0.114623	0.129527	0.0793912	0.223538	0	0.0727447	0.0735993	0.070983	0.140121	0.0727751	1.86422	1.69486	1.45224	0.807687	1.02813	0.492663	0	0	0	0	0	0	0	0	0	0	0	0	0.781685	0.818926	0.786538	0.916748	0.841108	0.903579	13.4547	0.0869373	0.0946264	1.2233	0	0	0.841431
MAG83	0.6007	d__Bacteria;p__Pseudomonadota;c__Gammaproteobacteria;o__Arenicellales;f__JAANXG01;g__JAHEKE01;s__Unclassified	0	0	0	0	0	0	0	0	0	0	0	0	0	0	0	0	0	0	0.550808	0.496388	0.590702	0.403156	1.1473	4.51195	0	0	0	0	0	0	0	0	0	0	0	0	7.7003	0	0	0	1.28338	0	0
MAG84	0.759	d__Bacteria;p__Chloroflexota;c__Anaerolineae;o__Anaerolineales;f__UBA4823;g__DSOS01;s__Unclassified	0.810459	0.937435	1.45254	1.1524	0.975601	1.35243	0.942017	1.0583	0.897933	0	0	0	0.433532	0.382344	0.168486	0.160797	0	0.632379	0	0	0.0874585	0	0	0.127078	0	0	0	0	0	0	0	0	0	0	0	0	11.5712	1.06435	0	0.296256	0.035756	0	0
MAG85	0.7052	d__Bacteria;p__Desulfobacterota;c__Desulfobacteria;o__Desulfobacterales;f__SG8-13;g__Unclassified;s__Unclassified	0	0	0	0	0	0	0	0	0	0	0	0	0	0	0	0	0	0	0.544262	0.658863	0.424352	0.310809	0.820467	0.653183	4.98435	4.92244	4.75453	2.97608	3.22312	4.11339	0.189997	0.215094	0.195254	0.195022	0.178137	0.225679	29.585	0	0	0	0.568656	4.16232	0.199864
MAG86	0.5726	d__Bacteria;p__Pseudomonadota;c__Gammaproteobacteria;o__Chromatiales;f__Sedimenticolaceae;g__Unclassified;s__Unclassified	0	0	0	0	0	0	0	0	0	0	0	0	0	0	0	0	0	0	0	0	0	0.0940175	0	0	0.782369	1.10071	0.857965	0.554635	0.69512	0.580825	0	0	0	0	0	0	4.66564	0	0	0	0.0156696	0.761937	0
MAG87	0.632	d__Bacteria;p__Pseudomonadota;c__Alphaproteobacteria;o__Rhizobiales;f__Xanthobacteraceae;g__Pseudolabrys;s__Unclassified	2.09298	1.91779	1.98112	2.51097	3.051	1.69908	4.65376	4.29135	4.12217	0.109436	0.128973	0.159959	0.39967	0.409224	0.205243	0	0	0.360953	0	0	0	0	0	0	0	0	0	0	0	0	0	0	0	0	0	0	28.0937	2.92447	0.13279	0.229182	0	0	0
MAG88	0.6373	d__Bacteria;p__Chloroflexota;c__Anaerolineae;o__Anaerolineales;f__Anaerolineaceae;g__UBA6170;s__Unclassified	0	0	0	0	0	0.0863366	0	0	0	0.123672	0.178041	0.15044	2.61315	2.07492	2.1303	3.14258	4.02522	2.14457	0	0	0	0	0	0	0	0	0	0	0	0	0.112633	0.101452	0.0990517	0.115937	0.0868525	0.11856	17.3037	0.00959296	0.150718	2.68846	0	0	0.105748
MAG89	0.7597	d__Bacteria;p__Pseudomonadota;c__Alphaproteobacteria;o__Rhizobiales;f__Rhizobiaceae;g__Salaquimonas;s__Unclassified	0	0	0	0	0	0	0	0	0	0	0	0	0	0	0	0	0	0	0.517043	0.419261	0.357298	0.548222	0.696399	0.455045	0.593846	0.632784	0.645325	0.450026	0.626937	0.442944	0.0634925	0.060932	0.0644694	0.0643909	0.0804725	0.0873283	6.80622	0	0	0	0.498878	0.56531	0.0701809
MAG9	0.7714	d__Bacteria;p__Acidobacteriota;c__Thermoanaerobaculia;o__Thermoanaerobaculales;f__Sulfomarinibacteraceae;g__Sulfomarinibacter;s__Sulfomarinibacter sp022340665	0	0	0	0	0	0	0	0	0	0	0	0	0	0	0	0	0	0	0	0	0	0	0.160905	0	1.59349	1.85456	1.48616	0.477064	0.740363	0.818636	0	0	0	0	0	0	7.13117	0	0	0	0.0268175	1.16171	0
MAG90	0.5332	d__Bacteria;p__Pseudomonadota;c__Gammaproteobacteria;o__Woeseiales;f__Woeseiaceae;g__JAACFE01;s__Unclassified	0	0	0	0	0	0	0	0.0888503	0	4.58176	6.15951	4.1675	0.115333	0	0.115192	0	0	0	0	0	0	0	0	0	0	0	0	0	0	0	0	0	0	0	0	0	15.2281	0.00987225	4.96959	0.0384209	0	0	0
MAG91	0.6403	d__Bacteria;p__Pseudomonadota;c__Alphaproteobacteria;o__Rhodobacterales;f__Rhodobacteraceae;g__Unclassified;s__Unclassified	0	0	0	0	0	0	0	0	0	0	0	0	0	0	0	0	0	0	0.815098	0.701644	0.45391	3.81166	0.592449	1.16302	0.10159	0.0964701	0.101465	0.061513	0.169698	0.0912536	0	0	0	0	0	0	8.15977	0	0	0	1.2563	0.103665	0
MAG92	0.696	d__Bacteria;p__Bacteroidota;c__Bacteroidia;o__Flavobacteriales;f__Flavobacteriaceae;g__Robiginitalea;s__Robiginitalea sp006227965	0	0	0	0	0	0	0	0	0	1.86961	1.05275	1.87584	0	0	0	0	0	0	0	0	0	0	0	0	0	0	0	0	0	0	0	0	0	0	0	0	4.7982	0	1.5994	0	0	0	0
MAG93	0.6484	d__Bacteria;p__Pseudomonadota;c__Gammaproteobacteria;o__Acidiferrobacterales;f__SPGG2;g__SZUA-472;s__SZUA-472 sp003251795	1.84054	2.4067	1.40368	1.03552	0.699483	0.553256	1.9899	2.45607	1.45433	0	0	0	0.0836641	0	0	0.0740375	0	0.133116	0	0	0	0	0	0	0	0	0	0	0	0	0	0	0	0	0	0	14.1303	1.53772	0	0.0484696	0	0	0
MAG94	0.8334	d__Bacteria;p__Pseudomonadota;c__Alphaproteobacteria;o__Rhizobiales;f__Methyloligellaceae;g__Methyloceanibacter;s__Unclassified	0	0	0	0	0	0	0	0	0	0	0	0	0	0	0	0	0	0	1.67741	1.32424	1.53955	1.11568	1.19372	1.15679	0.648639	0.625012	0.639256	0.453783	0.753117	0.632415	0.193328	0.202255	0.198802	0.179425	0.190143	0.240287	12.9638	0	0	0	1.33456	0.62537	0.200707
MAG95	0.9194	d__Bacteria;p__Chloroflexota;c__Anaerolineae;o__Promineofilales;f__Promineofilaceae;g__Unclassified;s__Unclassified	0.245744	0.21031	0.302116	0.304193	0.14047	0.536169	0.181996	0.196024	0.171223	0.287483	0.444718	0.261819	2.09527	1.82941	2.30798	0.92451	0.970549	0.66942	0	0	0	0	0	0	0	0	0	0	0	0	1.10702	1.12553	1.10074	1.24107	1.22052	1.25189	19.1262	0.254249	0.33134	1.46619	0	0	1.17446
MAG96	0.8626	d__Bacteria;p__Gemmatimonadota;c__Gemmatimonadetes;o__Longimicrobiales;f__UBA6960;g__JABDNZ01;s__Unclassified	0	0	0	0	0	0	0	0	0	0	0	0	0	0	0	0	0	0	0	0	0	0	0.172628	0	0.0956377	0	0	1.09497	1.16621	0.517542	0	0	0	0	0	0	3.04699	0	0	0	0.0287714	0.47906	0
MAG97	0.8208	d__Bacteria;p__Desulfobacterota;c__Desulfobacteria;o__Desulfobacterales;f__B30-G6;g__Unclassified;s__Unclassified	0	0	0	0	0	0	0	0	0	0	0	0	0	0	0	0	0	0	0	0	0	0	0.110153	0	0.856502	0.610643	0.631841	1.13869	0.979139	1.62583	0	0	0	0	0	0	5.9528	0	0	0	0.0183588	0.973775	0
MAG98	0.8335	d__Bacteria;p__Pseudomonadota;c__Alphaproteobacteria;o__Rhizobiales;f__Methyloligellaceae;g__Methyloceanibacter;s__Unclassified	0	0	0	0	0	0	0	0	0	0	0	0	0	0	0	0	0	0	0.985402	1.0014	1.19322	0.859559	0.887225	0.866846	0.691467	0.671245	0.682897	0.6445	0.769413	0.673955	0.136324	0.13886	0.139029	0.133126	0.139662	0.168724	10.7829	0	0	0	0.965609	0.688913	0.142621
MAG99	0.709	d__Bacteria;p__Chloroflexota;c__Anaerolineae;o__Anaerolineales;f__UBA4823;g__PFL25;s__Unclassified	1.20799	1.30345	1.90011	1.73745	1.72643	2.04808	1.0622	1.27493	1.58884	0	0	0	0.165417	0.130981	0	0.131331	0	0.581159	0	0	0	0	0	0	0	0	0	0	0	0	0	0	0	0	0.0386015	0	14.897	1.53883	0	0.168148	0	0	0.00643359
