# Supplementary material for: Divergent microbial community and functional dynamics in mangrove sediments along a polycyclic aromatic hydrocarbons (PAHs) gradient in China
Source: Research Square preprint supplement (doi:10.21203/rs.3.rs-7178259/v1), 2025-09-17
Supplement: Supplementary file 11 [file 7ec8aa8f771ca12cd0c9820e.xlsx]

## Sheet: PAH_degrading_ezymes profile
#Enzyme	CPT_LW_1	CPT_LW_2	CPT_LW_3	CPT_MZ_1	CPT_MZ_2	CPT_MZ_3	CPT_SW_1	CPT_SW_2	CPT_SW_3	DY_1	DY_2	DY_3	FG_SC_1	FG_SC_2	FG_SC_3	FG_WR_1	FG_WR_2	FG_WR_3	M1_1_1	M1_1_2	M1_1_3	M1_2_1	M1_2_2	M1_2_3	M2_1_1	M2_1_2	M2_1_3	M2_2_1	M2_2_2	M2_2_3	M3_1_1	M3_1_2	M3_1_3	M3_2_1	M3_2_2	M3_2_3	Total	Description	CPT	DY	FG	M1	M2	M3
1.1.1.1	27294	23828	28370	29158	31136	27776	29550	29864	28106	21062	16756	16802	30880	24204	20220	21028	17768	20032	18816	15738	20356	22164	17076	15850	30846	28974	30334	27326	28654	36168	27326	25060	24998	28178	32156	26446	900300	Oxidoreductases;Acting on other nitrogenous compounds as donors;With NAD+ or NADP+ as acceptor	28342.4	18206.7	22355.3	18333.3	30383.7	27360.7
1.1.1.146	0	0	0	0	0	0	0	0	0	0	0	0	0	2	0	0	0	0	2	2	0	2	8	2	0	8	12	2	12	2	0	0	0	0	0	0	54	Oxidoreductases;Acting on the CH-OH group of donors;With NAD+ or NADP+ as acceptor;11beta-hydroxysteroid:NADP+ 11-oxidoreductase	0	0	0.333333	2.66667	6	0
1.1.1.157	7452	6308	6958	7498	8400	7262	8184	8126	7590	7166	5024	5288	8036	5934	4862	6310	6194	5892	4496	4034	4978	5350	4712	3718	7052	6902	7306	8400	7656	10136	8634	7814	7908	9146	10004	7500	248230	Oxidoreductases;Acting on the CH-OH group of donors;With NAD+ or NADP+ as acceptor;(S)-3-hydroxybutanoyl-CoA:NADP+ oxidoreductase	7530.89	5826	6204.67	4548	7908.67	8501
1.1.1.163	414	306	482	440	422	388	404	474	458	230	192	190	466	356	240	408	316	328	352	320	304	490	244	278	718	636	598	498	540	764	354	306	344	382	612	414	14668	Oxidoreductases;Acting on the CH-OH group of donors;With NAD+ or NADP+ as acceptor;cyclopentanol:NAD+ oxidoreductase	420.889	204	352.333	331.333	625.667	402
1.1.1.179	662	652	808	758	836	940	714	788	1014	632	604	510	906	610	570	960	772	774	652	592	686	1084	588	438	1074	1012	1076	1096	1156	1414	906	740	774	984	1090	788	29660	Oxidoreductases;Acting on the CH-OH group of donors;With NAD+ or NADP+ as acceptor;D-xylose:NADP+ 1-oxidoreductase (D-xylono-1,5-lactone-forming)	796.889	582	765.333	673.333	1138	880.333
1.1.1.184	924	816	1112	1214	1392	1076	1136	1260	1172	578	508	420	978	864	690	710	662	724	1050	768	958	896	596	494	1352	1324	1386	1160	1232	1582	1054	1050	1068	1052	1102	1022	35382	Oxidoreductases;Acting on the CH-OH group of donors;With NAD+ or NADP+ as acceptor;secondary-alcohol:NADP+ oxidoreductase	1122.44	502	771.333	793.667	1339.33	1058
1.1.1.189	884	786	1068	1136	1338	1026	1014	1152	1074	574	496	406	952	838	686	672	634	678	998	738	920	876	558	480	1272	1256	1276	1106	1162	1482	986	986	996	1000	1032	972	33510	Oxidoreductases;Acting on the CH-OH group of donors;With NAD+ or NADP+ as acceptor;(5Z,13E)-(15S)-9alpha,11alpha,15-trihydroxyprosta-5,13-dienoate:NADP+ 9-oxidoreductase	1053.11	492	743.333	761.667	1259	995.333
1.1.1.197	884	786	1068	1136	1338	1026	1014	1152	1074	574	496	406	952	838	686	672	634	678	998	738	920	876	558	480	1272	1256	1276	1106	1162	1482	986	986	996	1000	1032	972	33510	Oxidoreductases;Acting on the CH-OH group of donors;With NAD+ or NADP+ as acceptor;(13E)-(15S)-11alpha,15-dihydroxy-9-oxoprost-13-enoate:NADP+ 15-oxidoreductase	1053.11	492	743.333	761.667	1259	995.333
1.1.1.2	292	254	356	302	370	478	338	338	432	160	218	86	236	250	202	222	344	172	552	486	616	568	468	268	686	658	664	520	662	784	514	392	494	344	394	454	14574	Oxidoreductases;Acting on the CH-OH group of donors;With NAD+ or NADP+ as acceptor;alcohol:NADP+ oxidoreductase	351.111	154.667	237.667	493	662.333	432
1.1.1.211	64	50	46	62	76	26	46	52	76	24	22	18	76	66	86	62	78	72	38	38	30	40	12	12	72	40	84	54	44	102	46	84	90	124	128	60	2100	Oxidoreductases;Acting on the CH-OH group of donors;With NAD+ or NADP+ as acceptor;long-chain-(S)-3-hydroxyacyl-CoA:NAD+ oxidoreductase	55.3333	21.3333	73.3333	28.3333	66	88.6667
1.1.1.244	0	0	0	0	0	0	0	0	0	0	0	0	0	0	0	0	6	0	0	0	0	0	0	0	0	0	0	0	0	0	0	0	0	0	0	2	8	Oxidoreductases;Acting on the CH-OH group of donors;With NAD+ or NADP+ as acceptor;methanol:NAD+ oxidoreductase	0	0	1	0	0	0.333333
1.1.1.258	16	10	6	18	14	20	26	18	16	30	0	2	0	6	10	0	0	0	4	0	2	0	4	18	0	0	0	4	0	0	6	16	8	8	14	4	280	Oxidoreductases;Acting on the CH-OH group of donors;With NAD+ or NADP+ as acceptor;6-hydroxyhexanoate:NAD+ oxidoreductase	16	10.6667	2.66667	4.66667	0.666667	9.33333
1.1.1.284	6522	5844	6328	6392	6890	5418	6804	6360	6056	3350	2848	2810	6300	4540	4108	4392	3170	4462	3298	2700	3454	4356	4022	3714	4682	4560	4734	3712	5012	5240	4360	3832	4082	4450	5574	4292	168668	Oxidoreductases;Acting on the CH-OH group of donors;With NAD+ or NADP+ as acceptor;S-(hydroxymethyl)glutathione:NAD+ oxidoreductase	6290.44	3002.67	4495.33	3590.67	4656.67	4431.67
1.1.1.29	1120	908	1054	1074	1376	1044	1138	1164	1192	1418	1246	1082	1654	1114	1008	1326	1346	944	1310	1096	1224	1660	1278	1074	2268	2046	2062	1582	1946	2158	1666	1454	1432	1594	1614	1482	50154	Oxidoreductases;Acting on the CH-OH group of donors;With NAD+ or NADP+ as acceptor;D-glycerate:NAD+ oxidoreductase	1118.89	1248.67	1232	1273.67	2010.33	1540.33
1.1.1.311	126	150	178	118	232	138	230	216	140	12	6	12	66	40	16	14	0	16	8	8	8	124	6	4	0	4	0	0	2	2	18	6	10	14	8	8	1940	Oxidoreductases;Acting on the CH-OH group of donors;With NAD+ or NADP+ as acceptor;(S)-1-phenylethanol:NAD+ oxidoreductase	169.778	10	25.3333	26.3333	1.33333	10.6667
1.1.1.312	790	852	910	956	1008	868	1006	888	1088	574	462	408	830	472	498	454	358	420	206	174	230	268	388	374	592	782	798	488	748	714	326	298	346	398	388	346	20706	Oxidoreductases;Acting on the CH-OH group of donors;With NAD+ or NADP+ as acceptor;4-carboxy-2-hydroxymuconate semialdehyde hemiacetal:NADP+ 2-oxidoreductase	929.556	481.333	505.333	273.333	687	350.333
1.1.1.337	2078	1824	2074	2036	2210	1640	2190	2044	1742	1094	920	848	1612	1322	1058	1202	1068	1080	1504	1338	1526	1896	922	790	1718	1540	1668	2122	1858	2526	976	852	814	1040	928	1024	53084	Oxidoreductases;Acting on the CH-OH group of donors;With NAD+ or NADP+ as acceptor;(2S)-2-hydroxycarboxylate:NAD+ oxidoreductase	1982	954	1223.67	1329.33	1905.33	939
1.1.1.35	12750	10810	13156	13118	14982	12782	13884	14362	13226	14322	11168	11616	17332	12812	10954	13652	13328	11362	10776	9334	11680	14114	10656	9528	16062	14940	15400	15184	16024	19550	16680	15292	15836	16842	19792	15740	499046	Oxidoreductases;Acting on the CH-OH group of donors;With NAD+ or NADP+ as acceptor;(S)-3-hydroxyacyl-CoA:NAD+ oxidoreductase	13230	12368.7	13240	11014.7	16193.3	16697
1.1.1.368	390	384	352	384	502	436	596	678	536	874	546	636	284	284	246	182	252	238	230	224	250	112	250	270	444	378	374	766	476	906	196	162	182	184	176	230	13610	Oxidoreductases;Acting on the CH-OH group of donors;With NAD+ or NADP+ as acceptor;6-hydroxycyclohex-1-ene-1-carbonyl-CoA:NAD+ 6-oxidoreductase	473.111	685.333	247.667	222.667	557.333	188.333
1.1.1.37	5428	4868	5380	5574	6414	5636	6674	6466	6180	5538	4176	4364	6746	4926	4314	5026	5176	4964	3662	3014	3810	4554	4034	3838	5788	5334	5872	5834	6020	7076	5814	5484	5480	6356	7120	5808	192748	Oxidoreductases;Acting on the CH-OH group of donors;With NAD+ or NADP+ as acceptor;(S)-malate:NAD+ oxidoreductase	5846.67	4692.67	5192	3818.67	5987.33	6010.33
1.1.1.399	16186	14148	17302	16944	19160	16258	17200	18442	16878	14236	11000	11398	19048	14234	11856	14126	14072	12924	11038	9506	11382	12550	9494	8534	16668	15984	16458	16978	16168	21738	15340	14276	14320	15470	16296	14924	532536	Oxidoreductases;Acting on the CH-OH group of donors;With NAD+ or NADP+ as acceptor;(R)-2-hydroxyglutarate:NAD+ 2-oxidireductase	16946.4	12211.3	14376.7	10417.3	17332.3	15104.3
1.1.1.404	172	194	254	170	228	244	228	214	240	12	24	10	100	44	52	62	42	124	6	4	10	14	18	10	222	228	322	66	76	142	182	200	218	284	278	170	4864	Oxidoreductases;Acting on the CH-OH group of donors;With NAD+ or NADP+ as acceptor;2,3,5,6-tetrachlorohydroquinone:NAD+ oxidoreductase	216	15.3333	70.6667	10.3333	176	222
1.1.1.429	20	12	16	14	18	8	10	14	10	14	2	22	20	10	24	14	30	10	86	74	62	46	40	36	6	20	4	2	4	16	10	14	4	2	14	14	722	Oxidoreductases;Acting on the CH-OH group of donors;With NAD+ or NADP+ as acceptor;(2S)-[(R)-hydroxy(phenyl)methyl]succinyl-CoA:NAD+ oxidoreductase	13.5556	12.6667	18	57.3333	8.66667	9.66667
1.1.1.87	16	26	46	52	52	38	44	30	44	20	12	56	122	106	80	336	354	202	28	22	24	30	14	6	104	118	116	126	92	130	42	36	38	46	58	28	2694	Oxidoreductases;Acting on the CH-OH group of donors;With NAD+ or NADP+ as acceptor;(1R,2S)-1-hydroxybutane-1,2,4-tricarboxylate:NAD+ oxidoreductase (decarboxylating)	38.6667	29.3333	200	20.6667	114.333	41.3333
1.1.1.90	744	620	876	776	802	772	906	798	1050	174	144	190	356	278	250	224	42	390	204	160	200	198	178	158	422	402	380	384	342	396	298	306	226	332	356	262	14596	Oxidoreductases;Acting on the CH-OH group of donors;With NAD+ or NADP+ as acceptor;aryl-alcohol:NAD+ oxidoreductase	816	169.333	256.667	183	387.667	296.667
1.1.1.95	16186	14148	17302	16944	19160	16258	17200	18442	16878	14236	11000	11398	19048	14234	11856	14126	14072	12924	11038	9506	11382	12550	9494	8534	16668	15984	16458	16978	16168	21738	15340	14276	14320	15470	16296	14924	532536	Oxidoreductases;Acting on the CH-OH group of donors;With NAD+ or NADP+ as acceptor;3-phospho-D-glycerate:NAD+ 2-oxidoreductase	16946.4	12211.3	14376.7	10417.3	17332.3	15104.3
1.1.2.10	1618	1392	1438	1462	1868	1104	1330	1362	1598	534	566	396	904	702	484	772	468	916	424	376	338	494	704	600	512	482	480	420	550	596	720	642	702	876	798	752	29380	Oxidoreductases;Acting on the CH-OH group of donors;With a cytochrome as acceptor;methanol:cytochrome cL oxidoreductase	1463.56	498.667	707.667	489.333	506.667	748.333
1.1.2.7	56	70	12	34	40	40	46	68	54	10	20	12	8	4	2	4	2	56	0	4	0	0	0	0	0	0	0	2	4	4	0	6	8	4	18	6	594	Oxidoreductases;Acting on the CH-OH group of donors;With a cytochrome as acceptor;methanol:cytochrome c oxidoreductase	46.6667	14	12.6667	0.666667	1.66667	7
1.1.2.8	4828	4064	3974	4338	5442	2956	5072	4750	4064	1980	1490	1610	2928	2304	1618	2010	1472	2096	1050	898	1104	1496	2156	1710	1296	1412	1314	1228	1586	1532	1214	1042	1236	1356	1590	1436	81652	Oxidoreductases;Acting on the CH-OH group of donors;With a cytochrome as acceptor;alcohol:cytochrome c oxidoreductase	4387.56	1693.33	2071.33	1402.33	1394.67	1312.33
1.1.3.13	4	0	4	2	6	4	4	4	2	0	0	0	0	0	4	0	2	14	4	4	0	2	6	2	4	0	0	2	0	0	2	2	2	0	8	2	90	Oxidoreductases;Acting on the CH-OH group of donors;With oxygen as acceptor;alcohol:oxygen oxidoreductase (H2O2-forming)	3.33333	0	3.33333	3	1	2.66667
1.1.7.1	2228	1934	2192	2466	2690	1816	2960	2854	2212	2668	1778	2082	1440	1372	1234	1056	698	1146	1300	930	1054	516	1340	1244	1444	1178	1166	2226	1594	2222	784	754	856	760	778	752	55724	Oxidoreductases;Acting on the CH-OH group of donors;With an iron-sulfur protein as acceptor;benzoyl-CoA:oxidized ferredoxin oxidoreductase	2372.44	2176	1157.67	1064	1638.33	780.667
1.1.99.31	716	598	586	670	780	398	766	730	612	518	292	342	716	454	366	476	348	298	118	94	130	382	178	162	136	76	134	84	170	170	430	472	416	448	474	402	14142	Oxidoreductases;Acting on the CH-OH group of donors;With unknown physiological acceptors;(S)-mandelate:acceptor 2-oxidoreductase	650.667	384	443	177.333	128.333	440.333
1.1.99.37	38	34	44	34	38	64	50	48	42	14	10	28	10	18	12	46	6	60	26	24	46	30	34	32	102	106	132	122	68	102	136	80	116	118	164	82	2116	Oxidoreductases;Acting on the CH-OH group of donors;With unknown physiological acceptors;methanol:acceptor oxidoreductase	43.5556	17.3333	25.3333	32	105.333	116
1.12.98.1	1484	1238	1470	1562	1680	1482	1484	1558	1622	1422	1112	1172	2206	1530	1494	1760	1780	1558	1664	1240	1742	1988	1326	1262	2014	1984	1998	2132	2256	2632	1882	1722	1834	2044	2064	1824	61222	Oxidoreductases;Acting on hydrogen as donor;With other, known, physiological acceptors;hydrogen:coenzyme F420 oxidoreductase	1508.89	1235.33	1721.33	1537	2169.33	1895
1.12.98.2	0	0	0	2	0	0	0	0	0	0	0	0	12	0	0	0	0	0	0	0	0	0	0	0	0	0	0	0	0	0	0	0	0	0	0	0	14	Oxidoreductases;Acting on hydrogen as donor;With other, known, physiological acceptors;hydrogen:5,10-methenyltetrahydromethanopterin oxidoreductase	0.222222	0	2	0	0	0
1.13.11.1	568	564	728	688	886	670	740	770	752	274	290	240	550	412	306	390	374	424	358	190	244	272	292	336	262	260	332	136	260	294	362	386	398	486	1178	514	16186	Oxidoreductases;Acting on single donors with incorporation of molecular oxygen (oxygenases);With incorporation of two atoms of oxygen;catechol:oxygen 1,2-oxidoreductase	707.333	268	409.333	282	257.333	554
1.13.11.14	342	276	318	300	324	264	368	352	304	52	116	46	476	228	202	166	164	112	134	70	136	124	110	86	230	266	324	182	252	312	170	160	134	154	152	174	7580	Oxidoreductases;Acting on single donors with incorporation of molecular oxygen (oxygenases);With incorporation of two atoms of oxygen;2,3-dihydroxybenzoate:oxygen 3,4-oxidoreductase (ring-opening)	316.444	71.3333	224.667	110	261	157.333
1.13.11.15	252	260	280	304	322	262	346	362	276	112	96	62	368	236	206	234	166	192	122	114	178	130	234	178	368	376	376	202	312	304	398	360	366	450	396	306	9506	Oxidoreductases;Acting on single donors with incorporation of molecular oxygen (oxygenases);With incorporation of two atoms of oxygen;3,4-dihydroxyphenylacetate:oxygen 2,3-oxidoreductase (ring-opening)	296	90	233.667	159.333	323	379.333
1.13.11.16	266	334	356	264	346	326	356	284	270	240	158	176	234	190	136	96	56	82	92	86	110	260	132	160	238	270	242	112	222	206	120	122	266	342	1496	466	9112	Oxidoreductases;Acting on single donors with incorporation of molecular oxygen (oxygenases);With incorporation of two atoms of oxygen;3-(2,3-dihydroxyphenyl)propanoate:oxygen 1,2-oxidoreductase (ring-opening)	311.333	191.333	132.333	140	215	468.667
1.13.11.2	5048	4318	5314	5480	6458	5112	5974	5954	5644	2148	1418	1538	4288	3260	2506	2906	2080	2926	1358	1098	1518	1492	1280	1052	3448	3366	3604	2402	2730	3416	2682	2506	2522	2878	3250	2506	115480	Oxidoreductases;Acting on single donors with incorporation of molecular oxygen (oxygenases);With incorporation of two atoms of oxygen;catechol:oxygen 2,3-oxidoreductase (ring-opening)	5478	1701.33	2994.33	1299.67	3161	2724
1.13.11.25	460	406	530	484	522	440	504	388	516	244	224	180	596	360	304	372	262	332	342	310	388	504	286	212	652	640	664	394	726	688	602	518	536	554	628	516	16284	Oxidoreductases;Acting on single donors with incorporation of molecular oxygen (oxygenases);With incorporation of two atoms of oxygen;3,4-dihydroxy-9,10-secoandrosta-1,3,5(10)-triene-9,17-dione:oxygen 4,5-oxidoreductase (ring-opening)	472.222	216	371	340.333	627.333	559
1.13.11.3	3610	3128	3534	3582	3970	3262	3688	3810	3650	1776	1138	1394	3150	2416	1694	2100	1788	1712	1308	1124	1386	1770	1304	1294	2326	2434	2396	1648	2028	2490	1756	1640	1636	1920	2284	1810	81956	Oxidoreductases;Acting on single donors with incorporation of molecular oxygen (oxygenases);With incorporation of two atoms of oxygen;protocatechuate:oxygen 3,4-oxidoreductase (ring-opening)	3581.56	1436	2143.33	1364.33	2220.33	1841
1.13.11.37	680	640	740	696	798	612	692	722	662	330	220	180	786	462	404	230	182	342	160	200	192	344	284	158	488	434	524	248	382	390	426	398	414	424	434	372	15650	Oxidoreductases;Acting on single donors with incorporation of molecular oxygen (oxygenases);With incorporation of two atoms of oxygen;hydroxyquinol:oxygen 1,2-oxidoreductase (ring-opening)	693.556	243.333	401	223	411	411.333
1.13.11.38	6	0	0	0	2	0	2	0	0	2	0	0	0	0	0	0	0	0	6	4	4	0	2	0	0	2	0	0	0	0	0	0	0	0	2	0	32	Oxidoreductases;Acting on single donors with incorporation of molecular oxygen (oxygenases);With incorporation of two atoms of oxygen;1-hydroxy-2-naphthoate:oxygen 1,2-oxidoreductase (ring-opening)	1.11111	0.666667	0	2.66667	0.333333	0.333333
1.13.11.39	402	336	384	392	358	384	428	386	284	44	24	38	136	112	104	118	140	142	48	62	86	106	70	52	134	116	78	64	124	94	68	60	68	68	108	72	5690	Oxidoreductases;Acting on single donors with incorporation of molecular oxygen (oxygenases);With incorporation of two atoms of oxygen;biphenyl-2,3-diol:oxygen 1,2-oxidoreductase (ring-opening)	372.667	35.3333	125.333	70.6667	101.667	74
1.13.11.5	1858	1574	1832	1784	2268	1682	1894	1930	1884	2258	1402	1562	3554	2516	2128	2410	2874	2090	1078	940	1158	1796	1480	1388	1356	1258	1388	1344	1656	1902	2062	1934	1942	1902	1914	1838	65836	Oxidoreductases;Acting on single donors with incorporation of molecular oxygen (oxygenases);With incorporation of two atoms of oxygen;homogentisate:oxygen 1,2-oxidoreductase (ring-opening)	1856.22	1740.67	2595.33	1306.67	1484	1932
1.13.11.56	8	0	0	8	6	0	0	0	0	2	0	0	0	0	0	0	0	0	0	0	0	0	0	0	0	0	0	0	0	0	0	0	0	0	0	0	24	Oxidoreductases;Acting on single donors with incorporation of molecular oxygen (oxygenases);With incorporation of two atoms of oxygen;naphthalene-1,2-diol:oxygen oxidoreductase	2.44444	0.666667	0	0	0	0
1.13.11.57	434	512	692	530	754	510	652	546	736	42	66	80	206	114	138	84	8	172	62	32	58	58	82	58	182	246	172	172	124	238	58	62	74	66	170	74	8264	Oxidoreductases;Acting on single donors with incorporation of molecular oxygen (oxygenases);With incorporation of two atoms of oxygen;3,4,5-trihydroxybenzoate:oxygen oxidoreductase	596.222	62.6667	120.333	58.3333	189	84
1.13.11.74	16	28	8	12	12	10	14	22	6	0	6	4	12	6	6	12	42	8	18	34	56	18	50	40	52	40	40	48	60	66	6	12	24	10	14	12	824	Oxidoreductases;Acting on single donors with incorporation of molecular oxygen (oxygenases);With incorporation of two atoms of oxygen;2-aminophenol:oxygen 1,6-oxidoreductase (ring-opening)	14.2222	3.33333	14.3333	36	51	13
1.13.11.76	16	28	8	12	12	10	14	22	6	0	6	4	12	6	6	12	42	8	18	34	56	18	50	40	52	40	40	48	60	66	6	12	24	10	14	12	824	Oxidoreductases;Acting on single donors with incorporation of molecular oxygen (oxygenases);With incorporation of two atoms of oxygen;2-amino-5-chlorophenol:oxygen 1,6-oxidoreductase (ring-opening)	14.2222	3.33333	14.3333	36	51	13
1.13.11.8	1428	1306	1530	1470	1662	1394	1452	1506	1602	612	538	576	1004	642	590	532	454	598	214	170	284	338	614	460	1050	1378	1540	694	1210	1026	618	490	582	578	556	492	31190	Oxidoreductases;Acting on single donors with incorporation of molecular oxygen (oxygenases);With incorporation of two atoms of oxygen;3,4-dihydroxybenzoate:oxygen 4,5-oxidoreductase (ring-opening)	1483.33	575.333	636.667	346.667	1149.67	552.667
1.14.12.1	270	330	332	334	404	284	310	384	340	96	94	44	240	208	122	128	96	142	124	124	184	176	146	100	348	324	430	264	314	300	186	184	236	240	618	224	8680	Oxidoreductases;Acting on paired donors, with incorporation or reduction of molecular oxygen;With NADH or NADPH as one donor, and incorporation of two atoms of oxygen into the other donor;anthranilate,NAD(P)H:oxygen oxidoreductase (1,2-hydroxylating, deaminating, decarboxylating)	332	78	156	142.333	330	281.333
1.14.12.10	476	346	466	392	460	244	400	362	342	224	210	176	378	272	230	354	352	248	120	82	126	146	142	156	270	306	250	174	198	248	426	388	536	544	1242	548	11834	Oxidoreductases;Acting on paired donors, with incorporation or reduction of molecular oxygen;With NADH or NADPH as one donor, and incorporation of two atoms of oxygen into the other donor;benzoate,NADH:oxygen oxidoreductase (1,2-hydroxylating)	387.556	203.333	305.667	128.667	241	614
1.14.12.11	0	0	0	0	4	0	6	2	0	0	0	0	0	0	0	0	0	0	0	0	0	0	0	0	0	8	2	2	2	2	0	2	2	2	22	2	58	Oxidoreductases;Acting on paired donors, with incorporation or reduction of molecular oxygen;With NADH or NADPH as one donor, and incorporation of two atoms of oxygen into the other donor;toluene,NADH:oxygen oxidoreductase (1,2-hydroxylating)	1.33333	0	0	0	2.66667	5
1.14.12.12	60	78	70	60	56	106	90	112	88	2	2	6	4	24	12	4	2	32	0	6	0	4	2	8	60	62	50	46	42	22	18	12	12	22	28	18	1220	Oxidoreductases;Acting on paired donors, with incorporation or reduction of molecular oxygen;With NADH or NADPH as one donor, and incorporation of two atoms of oxygen into the other donor;naphthalene,NADH:oxygen oxidoreductase (1,2-hydroxylating)	80	3.33333	13	3.33333	47	18.3333
1.14.12.15	20	24	46	22	30	2	50	14	8	2	0	4	10	0	0	2	4	4	8	0	4	0	12	0	0	0	0	0	0	0	4	6	6	6	10	0	298	Oxidoreductases;Acting on paired donors, with incorporation or reduction of molecular oxygen;With NADH or NADPH as one donor, and incorporation of two atoms of oxygen into the other donor;benzene-1,4-dicarboxylate,NADH:oxygen oxidoreductase (1,2-hydroxylating)	24	2	3.33333	4	0	5.33333
1.14.12.18	44	68	118	50	72	46	46	30	90	0	0	2	14	10	6	6	0	8	6	8	10	26	14	16	44	82	66	44	62	92	14	8	14	6	2	2	1126	Oxidoreductases;Acting on paired donors, with incorporation or reduction of molecular oxygen;With NADH or NADPH as one donor, and incorporation of two atoms of oxygen into the other donor;biphenyl,NADH:oxygen oxidoreductase (2,3-hydroxylating)	62.6667	0.666667	7.33333	13.3333	65	7.66667
1.14.12.19	470	408	500	408	410	350	428	412	482	8	34	60	142	122	100	52	34	156	108	100	104	152	124	156	466	434	416	304	358	408	124	80	300	322	1502	514	10548	Oxidoreductases;Acting on paired donors, with incorporation or reduction of molecular oxygen;With NADH or NADPH as one donor, and incorporation of two atoms of oxygen into the other donor;3-phenylpropanoate,NADH:oxygen oxidoreductase (2,3-hydroxylating)	429.778	34	101	124	397.667	473.667
1.14.12.22	10	14	12	12	4	6	10	2	6	0	0	0	18	18	20	0	0	0	4	6	8	8	4	10	12	12	2	4	6	4	0	2	2	4	8	4	232	Oxidoreductases;Acting on paired donors, with incorporation or reduction of molecular oxygen;With NADH or NADPH as one donor, and incorporation of two atoms of oxygen into the other donor;9H-carbazole,NAD(P)H:oxygen oxidoreductase (2,3-hydroxylating)	8.44444	0	9.33333	6.66667	6.66667	3.33333
1.14.12.23	60	78	70	60	56	106	90	112	88	2	2	6	4	24	12	4	2	32	0	6	0	4	2	8	60	62	50	46	42	22	18	12	12	22	28	18	1220	Oxidoreductases;Acting on paired donors, with incorporation or reduction of molecular oxygen;With NADH or NADPH as one donor, and incorporation of two atoms of oxygen into the other donor;nitrobenzene,NADH:oxygen oxidoreductase (1,2-hydroxylating, nitrite-releasing)	80	3.33333	13	3.33333	47	18.3333
1.14.12.24	60	78	70	60	56	106	90	112	88	2	2	6	4	24	12	4	2	32	0	6	0	4	2	8	60	62	50	46	42	22	18	12	12	22	28	18	1220	Oxidoreductases;Acting on paired donors, with incorporation or reduction of molecular oxygen;With NADH or NADPH as one donor, and incorporation of two atoms of oxygen into the other donor;2,4-dinitrotoluene,NADH:oxygen oxidoreductase (4,5-hydroxylating, nitrite-releasing)	80	3.33333	13	3.33333	47	18.3333
1.14.12.25	196	124	164	154	124	90	118	132	128	168	144	122	218	114	110	158	140	94	102	46	104	66	94	70	320	310	244	208	316	306	192	174	196	136	156	118	5656	Oxidoreductases;Acting on paired donors, with incorporation or reduction of molecular oxygen;With NADH or NADPH as one donor, and incorporation of two atoms of oxygen into the other donor;4-isopropylbenzoate:oxygen 2,3-oxidoreductase	136.667	144.667	139	80.3333	284	162
1.14.12.26	0	0	0	0	4	0	6	2	0	0	0	0	0	0	0	0	0	0	0	0	0	0	0	0	0	8	2	2	2	2	0	2	2	2	22	2	58	Oxidoreductases;Acting on paired donors, with incorporation or reduction of molecular oxygen;With NADH or NADPH as one donor, and incorporation of two atoms of oxygen into the other donor;chlorobenzene,NADH:oxygen oxidoreductase (1,2-hydroxylating)	1.33333	0	0	0	2.66667	5
1.14.12.3	0	0	0	0	4	0	6	2	0	0	0	0	0	0	0	0	0	0	0	0	0	0	0	0	0	8	2	2	2	2	0	2	2	2	22	2	58	Oxidoreductases;Acting on paired donors, with incorporation or reduction of molecular oxygen;With NADH or NADPH as one donor, and incorporation of two atoms of oxygen into the other donor;benzene,NADH:oxygen oxidoreductase (1,2-hydroxylating)	1.33333	0	0	0	2.66667	5
1.14.12.7	1994	1606	1972	1940	2204	1380	1802	1826	1604	614	410	558	798	570	562	458	338	736	234	252	274	308	410	528	316	276	364	256	382	418	588	526	534	590	620	528	28776	Oxidoreductases;Acting on paired donors, with incorporation or reduction of molecular oxygen;With NADH or NADPH as one donor, and incorporation of two atoms of oxygen into the other donor;phthalate,NADH:oxygen oxidoreductase (4,5-hydroxylating)	1814.22	527.333	577	334.333	335.333	564.333
1.14.13.1	50	18	56	64	104	50	66	70	92	14	0	16	34	22	12	10	10	14	4	16	0	40	2	4	4	8	8	8	22	6	2	0	4	6	24	2	862	Oxidoreductases;Acting on paired donors, with incorporation or reduction of molecular oxygen;With NADH or NADPH as one donor, and incorporation of one atom of oxygen into the other donor;salicylate,NADH:oxygen oxidoreductase (1-hydroxylating, decarboxylating)	63.3333	10	17	11	9.33333	6.33333
1.14.13.127	3866	3412	3518	3774	4478	2930	3772	3720	3636	1582	1280	1176	2922	2238	1698	1780	1530	1844	1066	894	1326	1742	980	976	1834	1796	1840	1402	1816	1826	2022	1842	1916	1970	3172	2054	79630	Oxidoreductases;Acting on paired donors, with incorporation or reduction of molecular oxygen;With NADH or NADPH as one donor, and incorporation of one atom of oxygen into the other donor;3-(3-hydroxyphenyl)propanoate,NADH:oxygen oxidoreductase (2-hydroxylating)	3678.44	1346	2002	1164	1752.33	2162.67
1.14.13.148	294	242	234	256	358	250	324	302	306	286	182	180	284	160	136	220	192	178	70	78	94	128	298	310	140	164	134	142	130	150	206	200	206	256	444	226	7760	Oxidoreductases;Acting on paired donors, with incorporation or reduction of molecular oxygen;With NADH or NADPH as one donor, and incorporation of one atom of oxygen into the other donor;N,N,N-trimethylamine,NADPH:oxygen oxidoreductase (N-oxide-forming)	285.111	216	195	163	143.333	256.333
1.14.13.166	110	110	104	150	220	88	186	218	146	28	22	52	48	20	12	14	4	8	0	2	8	2	6	8	14	4	4	2	6	6	38	38	24	22	24	36	1784	Oxidoreductases;Acting on paired donors, with incorporation or reduction of molecular oxygen;With NADH or NADPH as one donor, and incorporation of one atom of oxygen into the other donor;4-nitrocatechol,NAD(P)H:oxygen 4-oxidoreductase (4-hydroxylating, nitrite-forming)	148	34	17.6667	4.33333	6	30.3333
1.14.13.167	110	110	104	148	214	88	186	218	146	28	22	52	48	20	12	14	4	6	0	2	8	2	6	8	14	4	4	2	6	6	38	38	24	22	24	36	1774	Oxidoreductases;Acting on paired donors, with incorporation or reduction of molecular oxygen;With NADH or NADPH as one donor, and incorporation of one atom of oxygen into the other donor;4-nitrophenol,NAD(P)H:oxygen 4-oxidoreductase (4-hydroxylating, nitrite-forming)	147.111	34	17.3333	4.33333	6	30.3333
1.14.13.172	76	114	64	92	118	38	98	84	128	10	14	18	24	26	26	18	42	18	20	8	6	104	28	42	0	10	8	0	0	2	10	20	20	24	16	16	1342	Oxidoreductases;Acting on paired donors, with incorporation or reduction of molecular oxygen;With NADH or NADPH as one donor, and incorporation of one atom of oxygen into the other donor;salicylate,NADH:oxygen oxidoreductase (5-hydroxylating)	90.2222	14	25.6667	34.6667	3.33333	17.6667
1.14.13.2	2024	1786	2106	1934	2436	1780	2152	2212	2018	848	532	618	1264	936	804	734	540	922	468	304	414	748	638	676	952	988	1052	606	1080	996	810	640	682	784	876	692	39052	Oxidoreductases;Acting on paired donors, with incorporation or reduction of molecular oxygen;With NADH or NADPH as one donor, and incorporation of one atom of oxygen into the other donor;4-hydroxybenzoate,NADPH:oxygen oxidoreductase (3-hydroxylating)	2049.78	666	866.667	541.333	945.667	747.333
1.14.13.20	664	546	580	546	786	408	620	640	536	172	210	140	596	468	444	422	358	354	322	246	450	484	382	260	846	804	896	702	834	1004	530	512	526	644	1142	620	19694	Oxidoreductases;Acting on paired donors, with incorporation or reduction of molecular oxygen;With NADH or NADPH as one donor, and incorporation of one atom of oxygen into the other donor;2,4-dichlorophenol,NADPH:oxygen oxidoreductase (6-hydroxylating)	591.778	174	440.333	357.333	847.667	662.333
1.14.13.208	1556	1426	1616	1458	1754	1154	1696	1788	1676	2316	1362	1588	1588	1350	1386	1314	1110	1258	756	680	904	858	1428	1240	898	994	1096	654	1168	1004	1572	1442	1502	1574	1676	1446	48288	Oxidoreductases;Acting on paired donors, with incorporation or reduction of molecular oxygen;With NADH or NADPH as one donor, and incorporation of one atom of oxygen into the other donor;benzoyl-CoA,NADPH:oxygen oxidoreductase (2,3-epoxydizing)	1569.33	1755.33	1334.33	977.667	969	1535.33
1.14.13.219	0	0	2	0	2	0	6	2	14	0	0	2	0	4	4	0	0	0	0	0	0	0	0	0	0	0	0	0	0	0	0	0	0	0	0	0	36	Oxidoreductases;Acting on paired donors, with incorporation or reduction of molecular oxygen;With NADH or NADPH as one donor, and incorporation of one atom of oxygen into the other donor;resorcinol,NADPH:oxygen oxidoreductase (4-hydroxylating)	2.88889	0.666667	1.33333	0	0	0
1.14.13.22	6648	5790	6988	6056	7242	5362	6410	6156	6686	3052	2404	2258	5608	4162	3438	3686	2654	3708	3810	3380	4196	4988	3200	2926	6468	6476	6770	4678	7406	6868	6552	6132	6336	6456	7902	6524	189376	Oxidoreductases;Acting on paired donors, with incorporation or reduction of molecular oxygen;With NADH or NADPH as one donor, and incorporation of one atom of oxygen into the other donor;cyclohexanone,NADPH:oxygen oxidoreductase (lactone-forming)	6370.89	2571.33	3876	3750	6444.33	6650.33
1.14.13.23	2	4	4	4	30	8	4	10	6	194	128	122	2	4	6	0	0	2	0	0	2	0	0	0	0	0	2	6	4	6	0	0	0	0	0	0	550	Oxidoreductases;Acting on paired donors, with incorporation or reduction of molecular oxygen;With NADH or NADPH as one donor, and incorporation of one atom of oxygen into the other donor;3-hydroxybenzoate,NADPH:oxygen oxidoreductase (4-hydroxylating)	8	148	2.33333	0.333333	3	0
1.14.13.230	6	14	2	4	2	0	20	12	2	0	0	4	0	0	0	0	0	2	0	0	0	0	0	0	0	0	0	0	0	0	0	0	0	0	0	0	68	Oxidoreductases;Acting on paired donors, with incorporation or reduction of molecular oxygen;With NADH or NADPH as one donor, and incorporation of one atom of oxygen into the other donor;butane,NADH:oxygen oxidoreductase	6.88889	1.33333	0.333333	0	0	0
1.14.13.236	58	50	28	26	34	18	22	32	28	2	26	2	2	10	0	2	8	0	2	0	2	8	0	2	0	0	2	0	0	0	128	132	150	234	204	114	1326	Oxidoreductases;Acting on paired donors, with incorporation or reduction of molecular oxygen;With NADH or NADPH as one donor, and incorporation of one atom of oxygen into the other donor;toluene,NADH:oxygen oxidoreductase (4-hydroxylating)	32.8889	10	3.66667	2.33333	0.333333	160.333
1.14.13.24	1508	1248	1446	1514	1968	1208	1804	1648	1356	732	650	518	1162	852	788	854	718	878	534	494	570	700	580	512	758	702	660	634	816	866	836	654	706	1070	1172	850	33966	Oxidoreductases;Acting on paired donors, with incorporation or reduction of molecular oxygen;With NADH or NADPH as one donor, and incorporation of one atom of oxygen into the other donor;3-hydroxybenzoate,NADH:oxygen oxidoreductase (6-hydroxylating)	1522.22	633.333	875.333	565	739.333	881.333
1.14.13.243	206	160	178	138	144	204	298	262	238	190	212	156	640	450	498	796	766	702	432	322	446	248	352	292	436	408	368	452	574	550	830	824	902	1038	1166	846	16724	Oxidoreductases;Acting on paired donors, with incorporation or reduction of molecular oxygen;With NADH or NADPH as one donor, and incorporation of one atom of oxygen into the other donor;toluene,NADH:oxygen oxidoreductase (2,3-dihydroxylating)	203.111	186	642	348.667	464.667	934.333
1.14.13.244	206	160	178	138	144	204	298	262	238	190	212	156	640	450	498	796	766	702	432	322	446	248	352	292	436	408	368	452	574	550	830	824	902	1038	1166	846	16724	Oxidoreductases;Acting on paired donors, with incorporation or reduction of molecular oxygen;With NADH or NADPH as one donor, and incorporation of one atom of oxygen into the other donor;phenol,NADH:oxygen oxidoreductase (2-hydroxylating)	203.111	186	642	348.667	464.667	934.333
1.14.13.25	0	0	4	8	2	2	0	4	0	0	0	0	2	8	10	16	2	10	18	8	18	22	16	0	16	12	26	20	6	30	84	60	92	98	92	70	756	Oxidoreductases;Acting on paired donors, with incorporation or reduction of molecular oxygen;With NADH or NADPH as one donor, and incorporation of one atom of oxygen into the other donor;methane,NAD(P)H:oxygen oxidoreductase (hydroxylating)	2.22222	0	8	13.6667	18.3333	82.6667
1.14.13.29	0	0	0	2	6	0	0	0	0	0	0	0	0	0	0	0	0	2	0	0	0	0	0	0	0	0	0	0	0	0	0	0	0	0	0	0	10	Oxidoreductases;Acting on paired donors, with incorporation or reduction of molecular oxygen;With NADH or NADPH as one donor, and incorporation of one atom of oxygen into the other donor;4-nitrophenol,NADH:oxygen oxidoreductase (2-hydroxylating)	0.888889	0	0.333333	0	0	0
1.14.13.40	3024	2274	2766	2896	3330	2208	3166	3042	2824	2156	1546	1608	2922	2276	2014	2036	1744	1910	1002	920	1142	1416	1838	1708	1474	1350	1514	1220	1576	1718	2346	2068	2200	2292	2710	2100	74336	Oxidoreductases;Acting on paired donors, with incorporation or reduction of molecular oxygen;With NADH or NADPH as one donor, and incorporation of one atom of oxygen into the other donor;anthraniloyl-CoA,NAD(P)H:oxygen oxidoreductase (de-aromatizing)	2836.67	1770	2150.33	1337.67	1475.33	2286
1.14.13.50	18	6	8	2	4	0	2	4	0	0	2	4	0	0	0	0	0	6	4	0	0	0	10	24	0	0	0	0	4	0	28	38	28	26	30	46	294	Oxidoreductases;Acting on paired donors, with incorporation or reduction of molecular oxygen;With NADH or NADPH as one donor, and incorporation of one atom of oxygen into the other donor;pentachlorophenol,NADPH:oxygen oxidoreductase (hydroxylating, dechlorinating)	4.88889	2	1	6.33333	0.666667	32.6667
1.14.13.69	2	2	10	2	0	0	10	0	0	0	0	0	0	0	0	0	0	0	0	0	0	0	0	0	0	0	0	0	0	0	0	0	0	0	0	0	26	Oxidoreductases;Acting on paired donors, with incorporation or reduction of molecular oxygen;With NADH or NADPH as one donor, and incorporation of one atom of oxygen into the other donor;alkene,NADH:oxygen oxidoreductase	2.88889	0	0	0	0	0
1.14.13.7	1000	980	1384	970	1288	1166	1076	898	1274	340	272	292	772	414	448	394	176	614	272	200	256	382	400	340	686	862	1024	394	750	734	290	294	308	356	456	328	22090	Oxidoreductases;Acting on paired donors, with incorporation or reduction of molecular oxygen;With NADH or NADPH as one donor, and incorporation of one atom of oxygen into the other donor;phenol,NADPH:oxygen oxidoreductase (2-hydroxylating)	1115.11	301.333	469.667	308.333	741.667	338.667
1.14.13.82	464	336	410	430	590	368	476	442	460	310	240	226	548	350	308	320	242	290	144	148	194	370	214	116	512	610	742	328	438	550	532	446	468	572	848	480	14522	Oxidoreductases;Acting on paired donors, with incorporation or reduction of molecular oxygen;With NADH or NADPH as one donor, and incorporation of one atom of oxygen into the other donor;vanillate:oxygen oxidoreductase (demethylating)	441.778	258.667	343	197.667	530	557.667
1.14.14.1	230	232	198	256	300	190	244	236	194	64	38	46	126	148	98	112	142	148	148	116	128	160	82	102	100	112	146	50	118	124	164	144	180	156	254	192	5478	Oxidoreductases;Acting on paired donors, with incorporation or reduction of molecular oxygen;With reduced flavin or flavoprotein as one donor, and incorporation of one atom of oxygen into the other donor;substrate,NADPH---hemoprotein reductase:oxygen oxidoreductase (RH-hydroxylating or -epoxidizing)	231.111	49.3333	129	122.667	108.333	181.667
1.14.14.11	48	22	36	30	22	12	106	64	42	0	0	0	12	26	4	6	0	8	6	2	4	0	6	12	4	4	4	0	2	4	0	4	0	0	0	0	490	Oxidoreductases;Acting on paired donors, with incorporation or reduction of molecular oxygen;With reduced flavin or flavoprotein as one donor, and incorporation of one atom of oxygen into the other donor;styrene,FADH2:oxygen oxidoreductase	42.4444	0	9.33333	5	3	0.666667
1.14.14.27	202	158	156	226	296	134	212	224	174	24	8	2	36	42	18	20	12	58	6	0	2	4	26	10	6	6	16	0	0	4	20	32	20	34	22	28	2238	Oxidoreductases;Acting on paired donors, with incorporation or reduction of molecular oxygen;With reduced flavin or flavoprotein as one donor, and incorporation of one atom of oxygen into the other donor;resorcinol,FADH2:oxygen oxidoreductase (4-hydroxylating)	198	11.3333	31	8	5.33333	26
1.14.14.8	68	68	54	52	54	52	20	58	42	8	8	2	16	12	12	0	0	8	2	4	8	12	36	70	6	8	12	2	6	0	0	10	2	14	0	4	730	Oxidoreductases;Acting on paired donors, with incorporation or reduction of molecular oxygen;With reduced flavin or flavoprotein as one donor, and incorporation of one atom of oxygen into the other donor;anthranilate,FADH2:oxygen oxidoreductase (3-hydroxylating)	52	6	8	22	5.66667	5
1.14.14.80	12	26	32	34	24	20	10	24	38	8	2	6	16	30	18	18	2	10	18	0	12	40	12	18	20	8	14	12	12	16	4	0	2	4	4	0	526	Oxidoreductases;Acting on paired donors, with incorporation or reduction of molecular oxygen;With reduced flavin or flavoprotein as one donor, and incorporation of one atom of oxygen into the other donor;long-chain fatty acid,[reduced NADPH---hemoprotein reductase]:oxygen oxidoreductase (omega-hydroxylating)	24.4444	5.33333	15.6667	16.6667	13.6667	2.33333
1.14.14.9	1728	1384	1484	1514	1690	1072	1638	1522	1522	456	356	354	888	738	506	558	408	674	298	258	340	406	536	558	420	420	462	258	466	326	588	590	670	772	812	610	27282	Oxidoreductases;Acting on paired donors, with incorporation or reduction of molecular oxygen;With reduced flavin or flavoprotein as one donor, and incorporation of one atom of oxygen into the other donor;4-hydroxyphenylacetate,FADH2:oxygen oxidoreductase (3-hydroxylating)	1506	388.667	628.667	399.333	392	673.667
1.14.14.91	2	2	0	6	2	0	14	0	2	0	0	0	0	0	0	0	0	0	0	0	0	0	0	0	0	0	0	0	0	0	6	0	2	0	0	2	38	Oxidoreductases;Acting on paired donors, with incorporation or reduction of molecular oxygen;With reduced flavin or flavoprotein as one donor, and incorporation of one atom of oxygen into the other donor;trans-cinnamate,[reduced NADPH---hemoprotein reductase]:oxygen oxidoreductase (4-hydroxylating)	3.11111	0	0	0	0	1.66667
1.14.14.92	2	2	2	2	10	10	2	0	6	0	0	0	4	0	0	0	0	20	0	0	0	0	0	0	0	0	0	0	0	0	0	0	0	0	0	0	60	Oxidoreductases;Acting on paired donors, with incorporation or reduction of molecular oxygen;With reduced flavin or flavoprotein as one donor, and incorporation of one atom of oxygen into the other donor;benzoate,[reduced NADPH---hemoprotein reductase]:oxygen oxidoreductase (4-hydroxylating)	4	0	4	0	0	0
1.14.15.25	0	0	0	0	0	0	0	0	0	2	0	0	0	0	0	0	0	0	0	0	0	0	0	0	0	0	0	0	0	0	0	0	0	0	0	0	2	Oxidoreductases;Acting on paired donors, with incorporation or reduction of molecular oxygen;With reduced iron-sulfur protein as one donor, and incorporation of one atom of oxygen into the other donor;p-cymene,ferredoxin:oxygen oxidoreductase (methyl-hydroxylating)	0	0.666667	0	0	0	0
1.14.15.3	822	744	912	766	988	874	738	778	954	1822	1184	1304	1552	1078	938	1904	2074	1378	1240	960	1320	2060	1220	954	1168	1048	1146	1012	1504	1460	2022	1736	2010	2368	2928	2134	49100	Oxidoreductases;Acting on paired donors, with incorporation or reduction of molecular oxygen;With reduced iron-sulfur protein as one donor, and incorporation of one atom of oxygen into the other donor;alkane,reduced-rubredoxin:oxygen 1-oxidoreductase	841.778	1436.67	1487.33	1292.33	1223	2199.67
1.14.18.3	86	68	90	70	74	18	70	76	100	48	40	20	48	102	158	108	174	70	16	12	4	2	44	108	0	0	0	2	0	0	54	54	38	52	50	84	1940	Oxidoreductases;Acting on paired donors, with incorporation or reduction of molecular oxygen;With another compound as one donor, and incorporation of one atom of oxygen into the other donor;methane,quinol:oxygen oxidoreductase	72.4444	36	110	31	0.333333	55.3333
1.14.99.15	536	522	554	548	522	502	486	510	482	112	74	60	216	168	100	96	42	204	118	108	140	190	168	122	706	912	976	340	758	538	180	162	194	192	180	198	11916	Oxidoreductases;Acting on paired donors, with incorporation or reduction of molecular oxygen;Miscellaneous;4-methoxybenzoate,hydrogen-donor:oxygen oxidoreductase (O-demethylating)	518	82	137.667	141	705	184.333
1.14.99.39	86	68	90	70	74	18	70	76	100	48	40	20	48	102	158	108	174	70	16	12	4	2	44	108	0	0	0	2	0	0	54	54	38	52	50	84	1940	Oxidoreductases;Acting on paired donors, with incorporation or reduction of molecular oxygen;Miscellaneous;ammonia,donor:oxygen oxidoreductase (hydroxylamine-producing)	72.4444	36	110	31	0.333333	55.3333
1.17.1.10	9816	8782	10916	11208	11748	12292	11146	12780	10842	9876	7774	8112	11358	9160	7428	7964	7666	7270	9162	7282	8842	7524	7248	6108	10656	10374	10486	12224	11420	14806	8682	8406	8272	8368	8508	8550	343056	Oxidoreductases;Acting on CH or CH2 groups;With NAD+ or NADP+ as acceptor;formate:NADP+ oxidoreductase	11058.9	8587.33	8474.33	7694.33	11661	8464.33
1.17.1.9	20384	17550	20974	21156	23380	19568	21178	22154	21036	22358	18086	17976	24636	18620	15878	20588	18628	17424	15134	11992	15060	15508	16052	13920	19966	18764	19700	17846	19804	23502	22036	20686	20882	22480	22812	20750	698468	Oxidoreductases;Acting on CH or CH2 groups;With NAD+ or NADP+ as acceptor;formate:NAD+ oxidoreductase	20820	19473.3	19295.7	14611	19930.3	21607.7
1.17.9.1	412	356	464	424	440	358	410	494	400	140	62	136	128	70	76	104	54	176	116	100	90	136	96	66	242	312	296	114	216	238	270	202	196	192	236	246	8068	Oxidoreductases;Acting on CH or CH2 groups;With a copper protein as acceptor;4-methylphenol:oxidized azurin oxidoreductase (methyl-hydroxylating)	417.556	112.667	101.333	100.667	236.333	223.667
1.17.98.3	4922	4520	6116	6534	6430	7576	5716	6008	5596	4806	3462	4158	5274	5162	3844	4544	4130	4734	7716	6132	6510	4010	4024	2824	10398	9270	9694	14370	10024	16730	4438	4324	4062	4796	4694	4584	222132	Oxidoreductases;Acting on CH or CH2 groups;With other, known, physiological acceptors;formate:coenzyme-F420 oxidoreductase	5935.33	4142	4614.67	5202.67	11747.7	4483
1.17.98.4	262	172	234	262	304	172	244	246	234	256	238	220	386	276	206	264	152	156	120	90	152	124	156	100	126	122	182	106	164	174	132	152	158	162	180	170	6854	Oxidoreductases;Acting on CH or CH2 groups;With other, known, physiological acceptors;formate:[oxidized hydrogenase] oxidoreductase	236.667	238	240	123.667	145.667	159
1.18.1.1	170	122	198	178	158	178	142	212	148	262	164	220	206	214	190	286	334	164	208	226	254	404	192	162	534	550	592	402	446	448	430	438	490	528	1308	562	11720	Oxidoreductases;Acting on iron-sulfur proteins as donors;With NAD+ or NADP+ as acceptor;rubredoxin:NAD+ oxidoreductase	167.333	215.333	232.333	241	495.333	626
1.18.1.3	4702	4354	5370	5244	5862	5230	5212	5492	5362	3540	2840	2566	6040	4210	3260	4302	3730	4120	2720	2386	3286	3848	2414	2220	3894	3922	4186	3416	4130	4856	5670	5184	5556	6494	7386	5464	158468	Oxidoreductases;Acting on iron-sulfur proteins as donors;With NAD+ or NADP+ as acceptor;ferredoxin:NAD+ oxidoreductase	5203.11	2982	4277	2812.33	4067.33	5959
1.18.1.4	0	4	2	0	0	2	0	2	0	0	0	0	6	8	0	10	12	4	0	0	0	0	0	0	0	0	0	0	0	0	0	0	0	0	0	0	50	Oxidoreductases;Acting on iron-sulfur proteins as donors;With NAD+ or NADP+ as acceptor;rubredoxin:NAD(P)+ oxidoreductase	1.11111	0	6.66667	0	0	0
1.18.1.7	176	126	138	156	148	142	110	150	160	34	44	32	198	130	106	196	148	88	32	34	20	20	38	52	10	16	24	4	4	16	74	118	100	110	98	96	3148	Oxidoreductases;Acting on iron-sulfur proteins as donors;With NAD+ or NADP+ as acceptor;ferredoxin:NAD(P)+ oxidoreductase	145.111	36.6667	144.333	32.6667	12.3333	99.3333
1.18.6.1	1368	1322	1702	1394	1442	2162	1386	1608	1694	304	750	430	1210	1230	1290	1508	1498	1756	1064	1014	1008	1208	772	802	2000	1916	1912	2020	1886	2110	1124	1184	1154	1254	1204	1106	48792	Oxidoreductases;Acting on iron-sulfur proteins as donors;With dinitrogen as acceptor;ferredoxin:dinitrogen oxidoreductase (ATP-hydrolysing, molybdenum-dependent)	1564.22	494.667	1415.33	978	1974	1171
1.2.1.10	1268	1306	1538	1262	1334	1688	1248	1270	1660	406	534	496	1332	878	822	1012	798	1234	658	572	680	814	524	428	1332	1110	1108	976	1224	1410	1478	1298	1404	1778	2656	1570	41106	Oxidoreductases;Acting on the aldehyde or oxo group of donors;With NAD+ or NADP+ as acceptor;acetaldehyde:NAD+ oxidoreductase (CoA-acetylating)	1397.11	478.667	1012.67	612.667	1193.33	1697.33
1.2.1.28	350	364	578	396	332	388	438	422	462	264	208	298	360	212	188	192	84	296	26	22	44	44	92	78	326	374	362	224	270	350	160	112	118	132	228	112	8906	Oxidoreductases;Acting on the aldehyde or oxo group of donors;With NAD+ or NADP+ as acceptor;benzaldehyde:NAD+ oxidoreductase	414.444	256.667	222	51	317.667	143.667
1.2.1.3	11730	10190	11932	11008	12952	10120	12198	11512	12300	8340	6602	6808	12278	9414	8028	9922	8646	9384	6630	5836	7360	10488	6804	6444	11222	11056	11602	9656	11744	13064	11314	10032	10574	11668	13936	10572	363366	Oxidoreductases;Acting on the aldehyde or oxo group of donors;With NAD+ or NADP+ as acceptor;aldehyde:NAD+ oxidoreductase	11549.1	7250	9612	7260.33	11390.7	11349.3
1.2.1.31	0	20	32	26	14	22	30	22	24	10	18	8	38	16	20	2	24	14	72	48	8	2	26	70	8	8	0	14	14	20	6	4	2	4	6	2	654	Oxidoreductases;Acting on the aldehyde or oxo group of donors;With NAD+ or NADP+ as acceptor;(S)-2-amino-6-oxohexanoate:NAD(P)+ 6-oxidoreductase	21.1111	12	19	37.6667	10.6667	4
1.2.1.32	458	400	428	480	676	488	530	452	534	498	288	378	910	684	552	1002	1176	704	466	432	494	554	526	420	756	772	774	464	960	696	1058	992	1028	1042	1124	906	24102	Oxidoreductases;Acting on the aldehyde or oxo group of donors;With NAD+ or NADP+ as acceptor;2-aminomuconate-6-semialdehyde:NAD+ 6-oxidoreductase	494	388	838	482	737	1025
1.2.1.39	1028	888	1040	1080	1136	910	1062	1198	944	286	168	316	856	620	468	602	338	572	480	398	716	364	466	412	416	444	468	340	394	498	420	478	484	420	550	492	21752	Oxidoreductases;Acting on the aldehyde or oxo group of donors;With NAD+ or NADP+ as acceptor;phenylacetaldehyde:NAD+ oxidoreductase	1031.78	256.667	576	472.667	426.667	474
1.2.1.4	68	92	144	54	136	112	88	72	206	44	36	42	170	70	120	114	8	246	12	20	12	46	14	8	8	2	4	6	8	8	22	16	24	40	22	18	2112	Oxidoreductases;Acting on the aldehyde or oxo group of donors;With NAD+ or NADP+ as acceptor;aldehyde:NADP+ oxidoreductase	108	40.6667	121.333	18.6667	6	23.6667
1.2.1.46	28	42	20	22	42	30	26	28	42	16	30	16	78	66	28	48	26	56	16	22	26	16	34	26	14	26	10	26	26	26	20	20	4	22	32	12	1022	Oxidoreductases;Acting on the aldehyde or oxo group of donors;With NAD+ or NADP+ as acceptor;formaldehyde:NAD+ oxidoreductase	31.1111	20.6667	50.3333	23.3333	21.3333	18.3333
1.2.1.47	0	6	6	8	2	6	0	6	6	0	0	0	2	0	0	0	0	2	4	0	2	4	4	2	0	0	0	0	0	0	0	0	0	0	0	0	60	Oxidoreductases;Acting on the aldehyde or oxo group of donors;With NAD+ or NADP+ as acceptor;4-trimethylammoniobutanal:NAD+ 1-oxidoreductase	4.44444	0	0.666667	2.66667	0	0
1.2.1.5	850	892	1074	1142	1094	1266	1014	1066	1102	1340	810	1054	1190	1182	892	810	642	786	1466	1484	2192	2394	1104	974	1974	1980	1914	1354	1930	2032	5354	4900	4940	5348	5694	4732	69972	Oxidoreductases;Acting on the aldehyde or oxo group of donors;With NAD+ or NADP+ as acceptor;aldehyde:NAD(P)+ oxidoreductase	1055.56	1068	917	1602.33	1864	5161.33
1.2.1.60	732	774	710	818	868	650	786	808	816	360	228	238	976	604	540	542	430	414	268	228	316	416	524	486	604	718	740	390	658	538	456	424	448	384	404	370	19666	Oxidoreductases;Acting on the aldehyde or oxo group of donors;With NAD+ or NADP+ as acceptor;5-carboxymethyl-2-hydroxymuconic-semialdehyde:NAD+ oxidoreductase	773.556	275.333	584.333	373	608	414.333
1.2.1.65	0	0	0	0	0	0	0	0	0	0	0	0	0	0	0	0	0	0	0	0	0	0	0	0	2	4	0	0	0	0	0	0	0	0	0	0	6	Oxidoreductases;Acting on the aldehyde or oxo group of donors;With NAD+ or NADP+ as acceptor;salicylaldehyde:NAD+ oxidoreductase	0	0	0	0	1	0
1.2.1.67	866	850	960	954	1100	864	1072	1190	1232	456	254	376	530	320	246	276	214	338	232	170	226	302	220	220	148	160	122	116	148	186	204	124	166	188	430	166	15626	Oxidoreductases;Acting on the aldehyde or oxo group of donors;With NAD+ or NADP+ as acceptor;vanillin:NAD+ oxidoreductase	1009.78	362	320.667	228.333	146.667	213
1.2.1.77	290	234	250	288	360	226	364	354	274	154	92	130	124	174	218	130	76	106	50	24	82	56	202	164	118	64	70	54	92	108	58	56	82	56	80	94	5354	Oxidoreductases;Acting on the aldehyde or oxo group of donors;With NAD+ or NADP+ as acceptor;3,4-didehydroadipyl-CoA semialdehyde:NADP+ oxidoreductase	293.333	125.333	138	96.3333	84.3333	71
1.2.1.78	18	8	16	14	38	20	8	26	22	2	14	2	6	6	2	2	12	4	0	0	0	0	0	8	0	4	0	2	0	8	2	2	0	0	2	0	248	Oxidoreductases;Acting on the aldehyde or oxo group of donors;With NAD+ or NADP+ as acceptor;2-formylbenzoate:NAD+ oxidoreductase	18.8889	6	5.33333	1.33333	2.33333	1
1.2.1.8	0	20	32	26	14	22	30	22	24	10	18	8	38	16	20	2	24	14	72	48	8	2	26	70	8	8	0	14	14	20	6	4	2	4	6	2	654	Oxidoreductases;Acting on the aldehyde or oxo group of donors;With NAD+ or NADP+ as acceptor;betaine-aldehyde:NAD+ oxidoreductase	21.1111	12	19	37.6667	10.6667	4
1.2.1.85	458	400	428	480	676	488	530	452	534	498	288	378	910	684	552	1002	1176	704	466	432	494	554	526	420	756	772	774	464	960	696	1058	992	1028	1042	1124	906	24102	Oxidoreductases;Acting on the aldehyde or oxo group of donors;With NAD+ or NADP+ as acceptor;2-hydroxymuconate-6-semialdehyde:NAD+ oxidoreductase	494	388	838	482	737	1025
1.2.1.87	126	134	144	116	136	182	112	76	136	74	64	64	102	96	94	118	166	140	142	126	176	106	130	104	256	266	232	188	274	280	220	176	222	230	730	286	6224	Oxidoreductases;Acting on the aldehyde or oxo group of donors;With NAD+ or NADP+ as acceptor;propanal:NAD+ oxidoreductase (CoA-propanoylating)	129.111	67.3333	119.333	130.667	249.333	310.667
1.2.1.96	20	28	12	18	14	38	28	26	16	42	30	26	36	4	12	0	2	2	76	68	44	32	56	12	66	50	36	16	30	56	44	34	38	48	318	68	1446	Oxidoreductases;Acting on the aldehyde or oxo group of donors;With NAD+ or NADP+ as acceptor;4-hydroxybenzaldehyde:NADP+ oxidoreductase	22.2222	32.6667	9.33333	48	42.3333	91.6667
1.2.7.1	4762	3964	4694	5192	5144	5130	5574	6268	4898	5926	4884	5120	4668	4190	3740	4582	4836	4376	5664	4682	5882	4666	4418	3444	7190	6532	7160	8102	6800	9482	6672	6688	6164	6940	6532	6316	201282	Oxidoreductases;Acting on the aldehyde or oxo group of donors;With an iron-sulfur protein as acceptor;pyruvate:ferredoxin 2-oxidoreductase (CoA-acetylating)	5069.56	5310	4398.67	4792.67	7544.33	6552
1.2.7.12	3510	3124	3772	4084	4310	3964	3410	3852	3388	1796	1592	1606	4276	3540	2330	5016	4442	3898	2602	2122	2618	1700	1750	1334	4226	3400	3616	5674	4098	6600	2682	2456	2300	2852	2872	2764	117576	Oxidoreductases;Acting on the aldehyde or oxo group of donors;With an iron-sulfur protein as acceptor;formylmethanofuran:ferredoxin oxidoreductase	3712.67	1664.67	3917	2021	4602.33	2654.33
1.2.7.4	2112	1932	2780	3242	2934	4098	2952	3634	2990	2686	2192	2490	3274	3172	2558	3272	3216	3216	3942	3296	3488	1772	2022	1426	4524	3992	4136	5338	4378	6252	2882	2628	2568	2984	2776	2876	114030	Oxidoreductases;Acting on the aldehyde or oxo group of donors;With an iron-sulfur protein as acceptor;carbon-monoxide,water:ferredoxin oxidoreductase	2963.78	2456	3118	2657.67	4770	2785.67
1.2.7.7	54	30	82	82	64	78	66	54	52	186	84	110	24	50	36	16	32	24	42	40	60	48	30	12	166	154	148	446	260	400	38	52	52	48	54	44	3218	Oxidoreductases;Acting on the aldehyde or oxo group of donors;With an iron-sulfur protein as acceptor;3-methyl-2-oxobutanoate:ferredoxin oxidoreductase (decarboxylating; CoA-2-methylpropanoylating)	62.4444	126.667	30.3333	38.6667	262.333	48
1.2.98.1	38	34	44	34	38	64	50	48	42	14	10	28	10	18	12	46	6	60	26	24	46	30	34	32	102	106	132	122	68	102	136	80	116	118	164	82	2116	Oxidoreductases;Acting on the aldehyde or oxo group of donors;With other, known, physiological acceptors;formaldehyde:formaldehyde oxidoreductase	43.5556	17.3333	25.3333	32	105.333	116
1.21.4.5	88	70	74	68	122	78	66	56	84	6	2	8	62	54	32	28	0	54	8	0	4	4	22	40	32	46	68	8	10	30	22	10	6	22	12	8	1304	Oxidoreductases;Catalysing the reaction X-H + Y-H = X-Y;With a disulfide as acceptor;glutathione disulfide:2,6-dichlorohydroquinone (chlorinating)	78.4444	5.33333	38.3333	13	32.3333	13.3333
1.21.99.5	340	244	340	358	388	302	340	446	328	260	202	230	432	428	294	380	370	336	606	464	696	352	308	284	624	552	522	650	486	760	378	410	402	328	356	408	14604	Oxidoreductases;Catalysing the reaction X-H + Y-H = X-Y;With unknown physiological acceptors;acceptor:trichloroethene oxidoreductase (chlorinating)	342.889	230.667	373.333	451.667	599	380.333
1.3.1.119	0	0	0	0	0	0	0	0	0	0	0	0	0	0	0	0	0	0	0	0	0	0	0	0	0	0	0	0	0	0	0	2	0	0	6	2	10	Oxidoreductases;Acting on the CH-CH group of donors;With NAD+ or NADP+ as acceptor;(1R,2R)-3-chlorocyclohexa-3,5-diene-1,2-diol:NAD+ oxidoreductase	0	0	0	0	0	1.66667
1.3.1.19	0	0	0	0	0	0	0	0	0	0	0	0	0	0	0	0	0	0	0	0	0	0	0	0	0	0	0	0	0	0	0	2	0	0	6	2	10	Oxidoreductases;Acting on the CH-CH group of donors;With NAD+ or NADP+ as acceptor;cis-1,2-dihydrobenzene-1,2-diol:NAD+ oxidoreductase	0	0	0	0	0	1.66667
1.3.1.20	662	652	808	758	836	940	714	788	1014	632	604	510	906	610	570	960	772	774	652	592	686	1084	588	438	1074	1012	1076	1096	1156	1414	906	740	774	984	1090	788	29660	Oxidoreductases;Acting on the CH-CH group of donors;With NAD+ or NADP+ as acceptor;trans-1,2-dihydrobenzene-1,2-diol:NADP+ oxidoreductase	796.889	582	765.333	673.333	1138	880.333
1.3.1.25	66	54	46	60	42	70	58	48	46	24	22	36	74	42	30	80	96	54	28	12	6	54	6	8	68	58	42	20	38	18	84	58	80	140	644	188	2500	Oxidoreductases;Acting on the CH-CH group of donors;With NAD+ or NADP+ as acceptor;(1R,6S)-1,6-dihydroxycyclohexa-2,4-diene-1-carboxylate:NAD+ oxidoreductase (decarboxylating)	54.4444	27.3333	62.6667	19	40.6667	199
1.3.1.32	1104	972	966	1036	1190	782	1122	1048	1034	200	266	168	724	526	470	484	292	558	566	418	574	606	410	456	860	998	1028	538	786	900	484	534	426	518	572	466	24082	Oxidoreductases;Acting on the CH-CH group of donors;With NAD+ or NADP+ as acceptor;3-oxoadipate:NAD(P)+ oxidoreductase	1028.22	211.333	509	505	851.667	500
1.3.1.49	0	0	0	0	0	0	0	0	0	0	0	0	0	0	0	4	0	0	0	0	0	0	0	0	0	0	0	0	4	0	0	0	0	0	0	0	8	Oxidoreductases;Acting on the CH-CH group of donors;With NAD+ or NADP+ as acceptor;(+)-cis-3,4-dihydrophenanthrene-3,4-diol:NAD+ 3,4-oxidoreductase	0	0	0.666667	0	0.666667	0
1.3.1.53	0	0	0	0	0	0	0	0	0	0	4	2	0	0	2	0	0	0	2	2	8	0	0	2	8	0	0	0	2	0	6	0	2	0	4	0	44	Oxidoreductases;Acting on the CH-CH group of donors;With NAD+ or NADP+ as acceptor;(3S,4R)-3,4-dihydroxycyclohexa-1,5-diene-1,4-dicarboxylate:NAD+ oxidoreductase	0	2	0.333333	2.33333	1.66667	2
1.3.1.56	8	2	0	6	6	4	2	4	4	0	0	0	2	0	4	10	10	6	10	4	2	0	22	2	0	0	0	0	0	0	20	14	6	14	28	20	210	Oxidoreductases;Acting on the CH-CH group of donors;With NAD+ or NADP+ as acceptor;cis-3-phenylcyclohexa-3,5-diene-1,2-diol:NAD+ oxidoreductase	4	0	5.33333	6.66667	0	17
1.3.1.58	4	8	16	6	20	10	18	30	10	2	2	0	10	2	0	0	0	2	0	0	0	2	0	0	0	2	2	0	0	0	6	8	20	4	8	12	204	Oxidoreductases;Acting on the CH-CH group of donors;With NAD+ or NADP+ as acceptor;cis-2,3-dihydroxy-2,3-dihydro-p-cumate:NAD+ oxidoreductase	13.5556	1.33333	2.33333	0.333333	0.666667	9.66667
1.3.1.62	1080	1076	1170	1062	1264	968	1288	1374	1242	996	712	698	942	722	676	876	700	772	670	608	828	838	636	544	1012	974	1030	740	1148	1140	1188	1076	1128	1202	1338	1068	34786	Oxidoreductases;Acting on the CH-CH group of donors;With NAD+ or NADP+ as acceptor;pimeloyl-CoA:NAD+ oxidoreductase	1169.33	802	781.333	687.333	1007.33	1166.67
1.3.1.64	368	372	416	466	686	348	512	578	470	154	124	124	442	342	224	274	170	228	136	150	166	138	156	132	348	300	352	274	310	330	286	270	268	372	390	304	10980	Oxidoreductases;Acting on the CH-CH group of donors;With NAD+ or NADP+ as acceptor;cis-4,5-dihydroxycyclohexa-1(6),2-diene-1,2-dicarboxylate:NAD+ oxidoreductase	468.444	134	280	146.333	319	315
1.3.1.87	44	36	74	28	38	36	40	34	70	0	0	0	40	8	28	6	0	42	2	4	6	2	0	0	4	0	2	0	0	0	64	20	108	154	700	208	1798	Oxidoreductases;Acting on the CH-CH group of donors;With NAD+ or NADP+ as acceptor;3-(cis-5,6-dihydroxycyclohexa-1,3-dien-1-yl)propanoate:NAD+ oxidoreductase	44.4444	0	20.6667	2.33333	1	209
1.3.3.6	644	710	864	692	698	750	822	802	1102	216	234	234	840	610	536	848	748	1100	322	286	348	584	408	358	648	670	716	514	810	790	528	536	592	668	762	604	22594	Oxidoreductases;Acting on the CH-CH group of donors;With oxygen as acceptor;acyl-CoA:oxygen 2-oxidoreductase	787.111	228	780.333	384.333	691.333	615
1.3.7.8	3582	3116	3438	3782	4218	3394	5248	5216	3914	5614	3642	4236	2390	2072	1712	1856	2072	1948	1478	1042	1394	610	2010	1990	1498	1476	1466	2588	1660	2852	1100	1186	1124	1148	1090	1126	88288	Oxidoreductases;Acting on the CH-CH group of donors;With an iron-sulfur protein as acceptor;cyclohexa-1,5-diene-1-carbonyl-CoA:ferredoxin oxidoreductase (aromatizing, ATP-forming)	3989.78	4497.33	2008.33	1420.67	1923.33	1129
1.3.8.1	8920	7514	9690	9974	10956	9476	10420	11080	9998	9078	6864	7348	10112	8292	6716	8256	9196	7454	7324	6156	7862	7938	5798	4924	10580	9946	10280	13452	10888	15754	10578	9860	9940	10894	12980	10254	336752	Oxidoreductases;Acting on the CH-CH group of donors;With a flavin as acceptor;short-chain acyl-CoA:electron-transfer flavoprotein 2,3-oxidoreductase	9780.89	7763.33	8337.67	6667	11816.7	10751
1.3.8.10	20	6	20	8	6	54	16	26	10	16	20	22	2	12	0	0	0	10	6	2	8	2	4	0	32	4	10	94	16	72	8	10	4	0	12	2	534	Oxidoreductases;Acting on the CH-CH group of donors;With a flavin as acceptor;cyclohex-1-ene-1-carbonyl-CoA:electron transfer flavoprotein oxidoreductase	18.4444	19.3333	4	3.66667	38	6
1.3.8.11	44	28	50	44	50	74	62	42	48	80	38	60	18	20	30	14	10	34	46	38	28	8	20	24	22	26	32	122	34	72	34	26	22	34	28	48	1410	Oxidoreductases;Acting on the CH-CH group of donors;With a flavin as acceptor;cyclohexane-1-carbonyl-CoA:electron transfer flavoprotein oxidoreductase	49.1111	59.3333	21	27.3333	51.3333	32
1.3.8.17	560	454	632	652	680	622	660	626	602	622	452	486	918	744	658	584	492	412	588	602	926	1218	456	360	1168	1136	1212	944	1108	1268	1904	1656	1620	2042	2082	1738	32884	Oxidoreductases;Acting on the CH-CH group of donors;With a flavin as acceptor;oxidized coenzyme F420-0:FMN oxidoreductase	609.778	520	634.667	691.667	1139.33	1840.33
1.3.8.3	4	2	2	16	4	2	6	4	0	0	0	0	0	0	0	0	0	2	0	0	0	0	8	6	0	0	0	0	0	0	0	0	0	0	0	0	56	Oxidoreductases;Acting on the CH-CH group of donors;With a flavin as acceptor;(R)-benzylsuccinyl-CoA:electron transfer flavoprotein oxidoreductase	4.44444	0	0.333333	2.33333	0	0
1.3.8.5	442	348	448	354	474	274	604	588	404	350	200	234	194	196	92	84	98	136	128	128	118	230	218	154	112	84	100	108	146	104	78	74	90	90	100	96	7678	Oxidoreductases;Acting on the CH-CH group of donors;With a flavin as acceptor;short-chain 2-methylacyl-CoA:electron-transfer flavoprotein 2-oxidoreductase	437.333	261.333	133.333	162.667	109	88
1.3.8.6	3280	3072	3164	3310	3742	2868	3546	3460	3410	4184	2904	3328	4568	3296	3140	3504	3454	2912	2756	2318	2850	3358	3410	3230	3278	2782	2916	3036	3310	4138	4794	4462	4330	4762	5188	4170	126230	Oxidoreductases;Acting on the CH-CH group of donors;With a flavin as acceptor;glutaryl-CoA:electron-transfer flavoprotein 2,3-oxidoreductase (decarboxylating)	3316.89	3472	3479	2987	3243.33	4617.67
1.3.8.7	39906	35702	41500	39648	44544	35814	40976	41060	39200	26424	19578	20154	38384	29520	25286	26402	21420	25864	24758	22078	28226	31664	24244	21098	40740	40104	42368	35004	44518	47372	39652	36024	37294	40348	43538	35522	1225934	Oxidoreductases;Acting on the CH-CH group of donors;With a flavin as acceptor;medium-chain acyl-CoA:electron-transfer flavoprotein 2,3-oxidoreductase	39816.7	22052	27812.7	25344.7	41684.3	38729.7
1.3.8.8	1526	1488	1792	1590	1906	1542	1428	1452	1710	2044	1462	1542	2708	1616	1466	1958	1674	1592	1344	1192	1454	2216	1350	1104	2066	2058	2232	1422	2306	2232	2798	2484	2480	2618	3462	2308	67622	Oxidoreductases;Acting on the CH-CH group of donors;With a flavin as acceptor;long-chain acyl-CoA:electron-transfer flavoprotein 2,3-oxidoreductase	1603.78	1682.67	1835.67	1443.33	2052.67	2691.67
1.3.8.9	216	202	152	156	290	256	216	202	204	228	146	226	498	396	266	286	278	248	50	40	80	90	90	120	170	174	146	182	162	188	214	182	216	210	270	230	7280	Oxidoreductases;Acting on the CH-CH group of donors;With a flavin as acceptor;very-long-chain acyl-CoA:electron-transfer flavoprotein 2,3-oxidoreductase	210.444	200	328.667	78.3333	170.333	220.333
1.3.99.32	1342	1156	1482	1424	1574	1612	1556	1734	1472	1240	856	1020	1500	1256	892	1032	884	1024	694	644	708	382	498	370	1206	1106	1000	1906	1134	2086	738	828	774	930	846	908	39814	Oxidoreductases;Acting on the CH-CH group of donors;With unknown physiological acceptors;glutaryl-CoA:acceptor 2,3-oxidoreductase (non-decarboxylating)	1483.56	1038.67	1098	549.333	1406.33	837.333
1.4.9.1	832	678	818	792	994	702	774	838	724	900	568	562	1070	752	496	782	878	552	276	206	330	290	444	390	646	624	622	524	678	642	630	692	668	610	558	618	23160	Oxidoreductases;Acting on the CH-NH2 group of donors;With a copper protein as acceptor;methylamine:amicyanin oxidoreductase (deaminating)	794.667	676.667	755	322.667	622.667	629.333
1.5.1.36	48	44	72	74	86	58	40	34	42	76	48	60	30	24	14	22	20	60	8	10	8	8	32	18	4	6	2	16	12	14	4	10	0	2	2	2	1010	Oxidoreductases;Acting on the CH-NH group of donors;With NAD+ or NADP+ as acceptor;flavin:NAD+ oxidoreductase	55.3333	61.3333	28.3333	14	9	3.33333
1.5.1.37	2	0	0	0	0	0	0	0	0	0	0	0	0	2	0	0	0	0	4	0	0	0	0	0	0	0	4	0	0	0	4	10	6	6	14	14	66	Oxidoreductases;Acting on the CH-NH group of donors;With NAD+ or NADP+ as acceptor;FADH2:NAD+ oxidoreductase	0.222222	0	0.333333	0.666667	0.666667	9
1.5.1.5	400	342	402	354	464	284	338	364	390	52	72	72	308	256	202	192	176	168	190	110	210	174	168	128	460	400	386	392	318	456	222	188	174	210	250	184	9456	Oxidoreductases;Acting on the CH-NH group of donors;With NAD+ or NADP+ as acceptor;5,10-methylenetetrahydrofolate:NADP+ oxidoreductase	370.889	65.3333	217	163.333	402	204.667
1.5.8.1	2252	1764	1862	1850	2096	1818	2142	2056	1926	2632	1654	1942	2616	1962	1630	1620	1220	1530	1040	888	1212	794	2174	1868	1304	1170	1232	820	1106	1164	3520	3110	3182	3772	4020	2964	69912	Oxidoreductases;Acting on the CH-NH group of donors;With a flavin or flavoprotein as acceptor;dimethylamine:electron-transfer flavoprotein oxidoreductase	1974	2076	1763	1329.33	1132.67	3428
1.5.8.2	2252	1764	1862	1850	2096	1818	2142	2056	1926	2632	1654	1942	2616	1962	1630	1620	1220	1530	1040	888	1212	794	2174	1868	1304	1170	1232	820	1106	1164	3520	3110	3182	3772	4020	2964	69912	Oxidoreductases;Acting on the CH-NH group of donors;With a flavin or flavoprotein as acceptor;trimethylamine:electron-transfer flavoprotein oxidoreductase (demethylating)	1974	2076	1763	1329.33	1132.67	3428
1.5.98.1	0	6	14	2	10	16	0	4	0	54	34	52	68	68	62	270	268	170	16	4	4	4	0	0	2	0	0	10	2	14	28	28	32	60	26	46	1374	Oxidoreductases;Acting on the CH-NH group of donors;With other, known, physiological acceptors;5,10-methylenetetrahydromethanopterin:coenzyme-F420 oxidoreductase	5.77778	46.6667	151	4.66667	4.66667	36.6667
1.5.98.2	11158	9904	11678	11012	12462	10296	12538	12518	11626	5086	4312	3772	10818	7798	6500	7088	4704	6260	5500	5324	6678	8048	5086	4618	11108	10650	11334	8008	11542	11914	7852	7212	7390	7662	8302	7578	305336	Oxidoreductases;Acting on the CH-NH group of donors;With other, known, physiological acceptors;5-methyltetrahydromethanopterin:coenzyme-F420 oxidoreductase	11465.8	4390	7194.67	5875.67	10759.3	7666
1.5.99.5	3152	2468	2950	2838	3574	2268	2674	2464	2834	2904	1964	2078	3880	2522	2200	2452	2254	2166	1986	1782	2194	2648	2546	2124	2478	2290	2408	2070	2862	3010	2662	2448	2522	3060	3550	2574	92856	Oxidoreductases;Acting on the CH-NH group of donors;With unknown physiological acceptors;N-methyl-L-glutamate:acceptor oxidoreductase (demethylating)	2802.44	2315.33	2579	2213.33	2519.67	2802.67
1.6.2.4	230	232	198	254	296	190	242	236	188	64	38	46	120	146	94	112	128	146	148	116	128	160	82	102	100	112	146	50	118	122	162	142	176	146	246	178	5394	Oxidoreductases;Acting on NADH or NADPH;With a heme protein as acceptor;NADPH:hemoprotein oxidoreductase	229.556	49.3333	124.333	122.667	108	175
1.6.5.6	0	0	0	0	0	0	0	0	0	0	0	0	0	0	0	0	0	0	0	0	0	0	0	0	0	0	0	6	0	0	2	0	0	0	2	0	10	Oxidoreductases;Acting on NADH or NADPH;With a quinone or similar compound as acceptor;NADPH:p-benzoquinone oxidoreductase	0	0	0	0	1	0.666667
1.6.5.7	0	0	0	0	0	0	0	0	0	0	0	0	0	0	0	0	0	0	8	0	0	0	0	0	0	0	0	0	0	0	0	0	0	0	0	0	8	Oxidoreductases;Acting on NADH or NADPH;With a quinone or similar compound as acceptor;NADH:2-hydroxy-1,4-benzoquinone oxidoreductase	0	0	0	1.33333	0	0
1.7.1.16	138	108	160	216	248	198	102	148	190	74	114	120	292	146	178	212	126	170	216	218	202	420	168	156	452	374	344	474	412	612	240	184	200	262	322	192	8388	Oxidoreductases;Acting on other nitrogenous compounds as donors;With NAD+ or NADP+ as acceptor;N-phenylhydroxylamine:NADP+ oxidoreductase	167.556	102.667	187.333	230	444.667	233.333
1.7.2.3	1828	1606	2434	3038	2664	4190	3024	4060	3236	1118	1182	1006	2124	1388	972	2086	1760	1930	506	374	472	402	314	260	2284	2752	3098	2118	1446	2478	1390	1374	1212	1394	1448	1276	64244	Oxidoreductases;Acting on other nitrogenous compounds as donors;With a cytochrome as acceptor;trimethylamine:cytochrome c oxidoreductase	2897.78	1102	1710	388	2362.67	1349
1.8.7.3	18168	17718	24846	27718	26074	33108	24368	29554	24696	25406	22110	23314	28450	28504	20854	20452	17964	21412	32802	26128	29546	15400	16368	10664	44698	40314	40982	58860	38130	65560	24722	24622	23000	27194	26070	25796	1005572	Oxidoreductases;Acting on a sulfur group of donors;With an iron-sulfur protein as acceptor;CoB,CoM:ferredoxin oxidoreductase	25138.9	23610	22939.3	21818	48090.7	25234
1.8.98.1	4494	3990	5164	5222	5170	6222	5314	5720	5168	4946	4110	4196	5328	4822	3722	4220	4256	4136	5198	4272	5288	3572	2846	2242	7556	7174	7548	10850	6900	11634	5406	5186	4894	5562	5794	5214	193336	Oxidoreductases;Acting on a sulfur group of donors;With other, known, physiological acceptors;CoB:CoM:methanophenazine oxidoreductase	5162.67	4417.33	4414	3903	8610.33	5342.67
1.8.98.4	18136	17678	24796	27654	26040	33032	24324	29520	24656	25354	22028	23250	28204	28280	20756	19820	17280	20958	32714	26072	29478	15370	16336	10646	44648	40266	40936	58816	38078	65478	24638	24482	22908	27064	25914	25694	1001304	Oxidoreductases;Acting on a sulfur group of donors;With other, known, physiological acceptors;CoB,CoM,ferredoxin:coenzyme F420 oxidoreductase	25092.9	23544	22549.7	21769.3	48037	25116.7
1.8.98.5	21472	20942	29470	32658	30850	39370	29160	35410	29364	29336	25676	26908	33956	33372	24712	24034	21216	24934	37600	30252	34484	18266	18610	12406	53078	47460	48128	70880	45484	78618	29432	29510	27390	32360	31206	30814	1188818	Oxidoreductases;Acting on a sulfur group of donors;With other, known, physiological acceptors;CoB,CoM,ferredoxin:H2 oxidoreductase	29855.1	27306.7	27037.3	25269.7	57274.7	30118.7
1.8.98.6	24418	23466	32954	36382	34526	43396	32024	38034	32192	31958	27176	29146	35670	35376	26200	25912	22810	27254	43098	34384	38462	20406	21586	14188	59562	53080	54088	79588	51864	89500	31008	30826	28790	33998	32686	32440	1308448	Oxidoreductases;Acting on a sulfur group of donors;With other, known, physiological acceptors;coenzyme B,coenzyme M,ferredoxin:formate oxidoreductase	33043.6	29426.7	28870.3	28687.3	64613.7	31624.7
2.1.1.21	7300	5944	6982	6792	8270	5948	7264	6936	6766	3976	3084	3062	6188	4866	4098	4298	3574	4528	5814	5124	6296	7172	7104	6506	6838	6492	6988	6780	7924	8968	5612	4828	5300	5906	7222	5734	216484	Transferases;Transferring one-carbon groups;Methyltransferases;methylamine:L-glutamate N-methyltransferase	6911.33	3374	4592	6336	7331.67	5767
2.1.1.245	2476	2436	3578	3930	3648	4776	3286	4034	3414	3114	2482	2862	3342	3078	2198	2538	2212	2676	3600	2974	3204	1902	1746	1338	4824	4646	4546	6124	4168	7262	2390	2642	2362	2674	2542	2896	117920	Transferases;Transferring one-carbon groups;Methyltransferases;5-methyltetrahydrosarcinapterin:corrinoid/iron-sulfur protein methyltransferase	3508.67	2819.33	2674	2460.67	5261.67	2584.33
2.1.1.246	316	270	400	430	360	594	368	436	356	236	172	240	594	446	352	956	900	866	762	560	548	350	298	320	1408	1228	1156	1318	948	1730	262	294	274	318	302	334	20702	Transferases;Transferring one-carbon groups;Methyltransferases;methylated methanol-specific corrinoid protein:CoM methyltransferase	392.222	216	685.667	473	1298	297.333
2.1.1.247	200	122	204	198	206	290	180	222	158	110	66	114	362	274	204	306	460	262	154	136	138	78	62	52	250	196	218	306	262	304	220	188	184	180	238	184	7288	Transferases;Transferring one-carbon groups;Methyltransferases;methylated monomethylamine-specific corrinoid protein:CoM methyltransferase	197.778	96.6667	311.333	103.333	256	199
2.1.1.248	464	456	674	752	688	770	568	674	566	490	624	500	560	812	424	688	680	764	798	622	910	258	336	294	854	562	598	1004	612	1286	410	560	402	520	570	496	22246	Transferases;Transferring one-carbon groups;Methyltransferases;monomethylamine:5-hydroxybenzimidazolylcobamide Co-methyltransferase	623.556	538	654.667	536.333	819.333	493
2.1.1.249	172	168	274	314	242	394	196	244	270	264	336	260	446	446	362	1040	826	720	312	258	242	60	112	94	588	516	518	1762	734	1628	690	588	530	636	750	678	17670	Transferases;Transferring one-carbon groups;Methyltransferases;dimethylamine:5-hydroxybenzimidazolylcobamide Co-methyltransferase	252.667	286.667	640	179.667	957.667	645.333
2.1.1.250	11404	10868	13590	13664	13828	15806	11948	13606	12570	14140	12420	11756	15632	14564	10440	11814	9092	11676	13174	10918	13400	7742	9868	8628	14336	12794	13936	18314	12532	21950	12176	11986	11298	13472	13898	12490	461730	Transferases;Transferring one-carbon groups;Methyltransferases;trimethylamine:5-hydroxybenzimidazolylcobamide Co-methyltransferase	13031.6	12772	12203	10621.7	15643.7	12553.3
2.1.1.341	1246	1292	1558	1440	1556	1440	1544	1632	1620	460	252	444	898	444	424	362	108	626	188	164	206	308	288	320	478	618	590	312	450	518	188	122	166	172	172	164	22770	Transferases;Transferring one-carbon groups;Methyltransferases;vanillate:tetrahydrofolate O-methyltransferase	1480.89	385.333	477	245.667	494.333	164
2.1.1.377	316	270	400	430	360	594	368	436	356	236	172	240	594	446	352	956	900	866	762	560	548	350	298	320	1408	1228	1156	1318	948	1730	262	294	274	318	302	334	20702	Transferases;Transferring one-carbon groups;Methyltransferases;methylated glycine betaine-specific corrinoid protein:CoM methyltransferase	392.222	216	685.667	473	1298	297.333
2.1.1.382	818	788	1164	1268	982	1650	1254	1530	1164	464	558	470	858	690	478	652	554	834	708	636	844	388	314	240	2186	2192	2008	2728	1534	3230	762	696	686	756	786	710	37580	Transferases;Transferring one-carbon groups;Methyltransferases;methoxylated aromatic compound:cobamide Co-methyltransferase	1179.78	497.333	677.667	521.667	2313	732.667
2.1.1.86	854	766	1086	1176	1132	1432	966	1174	998	486	412	472	1138	1114	768	2012	2056	1666	650	580	588	542	482	452	1370	1350	1230	1200	882	1640	768	716	658	798	738	814	35166	Transferases;Transferring one-carbon groups;Methyltransferases;5-methyl-5,6,7,8-tetrahydromethanopterin:CoM 2-methyltransferase (Na+-transporting)	1064.89	456.667	1459	549	1278.67	748.667
2.1.1.90	108	98	76	110	146	150	110	110	86	96	70	106	338	176	172	498	674	324	82	82	62	26	38	26	322	292	290	378	240	428	84	124	142	132	90	104	6390	Transferases;Transferring one-carbon groups;Methyltransferases;methanol:5-hydroxybenzimidazolylcobamide Co-methyltransferase	110.444	90.6667	363.667	52.6667	325	112.667
2.1.2.1	8604	7882	9230	8890	10128	8984	9234	9932	9230	8122	6432	6692	11900	9392	7674	9800	9040	8070	6974	6082	6950	7420	6318	5408	10568	9694	9848	11336	10194	13252	10254	9878	9606	10876	12342	9960	326196	Transferases;Transferring one-carbon groups;Hydroxymethyl-, formyl- and related transferases;5,10-methylenetetrahydrofolate:glycine hydroxymethyltransferase	9123.78	7082	9312.67	6525.33	10815.3	10486
2.2.1.10	304	308	320	446	512	398	488	510	458	260	230	248	268	330	188	526	474	502	318	258	246	62	144	180	240	196	220	288	120	336	214	222	222	272	228	214	10750	Transferases;Transferring aldehyde or ketonic groups;Transketolases and transaldolases;L-aspartate 4-semialdehyde:1-deoxy-D-threo-hexo-2,5-diulose 6-phosphate methylglyoxaltransferase	416	246	381.333	201.333	233.333	228.667
2.2.1.11	2	10	10	16	16	6	0	6	18	12	18	6	76	66	22	172	136	124	30	20	12	12	6	4	40	16	32	132	40	108	20	18	26	28	28	24	1312	Transferases;Transferring aldehyde or ketonic groups;Transketolases and transaldolases;2-oxopropanal:D-fructose 1,6-bisphosphate glycerone-phosphotransferase	9.33333	12	99.3333	14	61.3333	24
2.2.1.3	2	4	2	0	2	10	2	2	0	0	0	0	4	6	0	0	0	2	0	0	0	0	0	0	0	0	0	0	0	0	0	0	0	0	0	0	36	Transferases;Transferring aldehyde or ketonic groups;Transketolases and transaldolases;D-xylulose-5-phosphate:formaldehyde glycolaldehydetransferase	2.66667	0	2	0	0	0
2.3.1.101	444	456	424	454	706	352	440	418	444	240	274	236	684	480	352	526	556	432	250	260	276	324	246	236	672	584	530	640	566	794	392	352	376	494	510	382	15802	Transferases;Acyltransferases;Transferring groups other than aminoacyl groups;formylmethanofuran:5,6,7,8-tetrahydromethanopterin 5-formyltransferase	459.778	250	505	265.333	631	417.667
2.3.1.16	7886	7322	8212	8580	9392	7738	8974	9404	8378	7074	5480	5728	9046	7434	5822	6146	5360	6324	5030	4392	5690	6310	4960	4330	7468	7412	7576	7970	8192	9906	7508	6886	7362	7916	8868	7304	259380	Transferases;Acyltransferases;Transferring groups other than aminoacyl groups;acyl-CoA:acetyl-CoA C-acyltransferase	8431.78	6094	6688.67	5118.67	8087.33	7640.67
2.3.1.169	32	42	54	58	60	94	42	82	50	200	100	170	152	134	96	362	454	330	52	8	58	10	8	2	52	62	48	66	56	108	32	32	44	54	34	30	3268	Transferases;Acyltransferases;Transferring groups other than aminoacyl groups;acetyl-CoA:corrinoid protein O-acetyltransferase	57.1111	156.667	254.667	23	65.3333	37.6667
2.3.1.174	1812	1678	1794	1906	2120	2042	2228	2110	2024	2520	1772	1904	3016	2500	1996	2362	2382	2080	990	814	1028	1504	1236	1226	1836	1510	1650	1618	1762	1986	1738	1474	1806	1896	3196	1868	67384	Transferases;Acyltransferases;Transferring groups other than aminoacyl groups;succinyl-CoA:acetyl-CoA C-succinyltransferase	1968.22	2065.33	2389.33	1133	1727	1996.33
2.3.1.21	2	0	0	0	0	0	2	0	0	0	0	0	0	0	0	0	0	0	8	0	4	0	2	2	0	0	0	0	4	2	4	8	18	8	12	6	82	Transferases;Acyltransferases;Transferring groups other than aminoacyl groups;palmitoyl-CoA:L-carnitine O-palmitoyltransferase	0.444444	0	0	2.66667	1	9.33333
2.3.1.310	188	154	128	134	162	116	202	276	174	26	54	46	106	90	74	74	26	84	44	20	30	28	38	48	20	44	44	24	28	36	74	76	70	70	72	72	2952	Transferases;Acyltransferases;Transferring groups other than aminoacyl groups;(S)-2-benzoylsuccinyl-CoA:CoA benzoyltransferase (benzoyl-CoA-forming)	170.444	42	75.6667	34.6667	32.6667	72.3333
2.3.1.40	4408	3726	4226	4532	5820	4524	4588	5018	4992	3084	2960	2316	4794	3206	2880	3056	3194	2636	2520	2278	2758	3152	2730	2562	4978	4762	4782	3900	4456	4788	3522	3090	3156	3416	3982	3240	134032	Transferases;Acyltransferases;Transferring groups other than aminoacyl groups;acyl-[acyl-carrier protein]:O-(2-acyl-sn-glycero-3-phospho)ethanolamine O-acyltransferase	4648.22	2786.67	3294.33	2666.67	4611	3401
2.3.1.8	3038	2712	3644	3230	3996	4024	3288	3362	3962	3160	2486	2440	4936	3446	3056	3430	3768	3106	4066	3658	4246	4786	3396	2550	7642	7610	7622	7284	7608	9512	6788	6154	6440	7090	8520	6582	172638	Transferases;Acyltransferases;Transferring groups other than aminoacyl groups;acetyl-CoA:phosphate acetyltransferase	3472.89	2695.33	3623.67	3783.67	7879.67	6929
2.3.1.9	27720	24444	29194	29036	31930	28156	30378	30662	29340	19902	15994	15644	29490	23000	19178	21722	19790	21248	19688	16186	21088	22630	17570	15734	30210	28886	29958	29722	29972	37158	28296	26562	25976	29100	32252	26636	914452	Transferases;Acyltransferases;Transferring groups other than aminoacyl groups;acetyl-CoA:acetyl-CoA C-acetyltransferase	28984.4	17180	22404.7	18816	30984.3	28137
2.3.3.14	384	386	358	438	552	334	394	518	358	494	200	360	234	204	130	356	386	328	136	124	88	122	90	152	166	130	122	364	212	374	74	64	54	78	104	78	8946	Transferases;Acyltransferases;Acyl groups converted into alkyl groups on transfer;acetyl-CoA:2-oxoglutarate C-acetyltransferase (thioester-hydrolysing, carboxymethyl-forming)	413.556	351.333	273	118.667	228	75.3333
2.4.1.17	138	98	156	154	182	152	148	174	188	126	62	80	234	184	150	126	126	102	90	44	90	78	58	68	102	102	88	162	98	150	126	136	92	142	120	130	4456	Transferases;Glycosyltransferases;Hexosyltransferases;UDP-alpha-D-glucuronate beta-D-glucuronosyltransferase (acceptor-unspecific; configuration-inverting)	154.444	89.3333	153.667	71.3333	117	124.333
2.5.1.129	1774	1538	1870	2066	2200	1900	1862	2230	1784	1530	1284	1424	1982	1544	1300	1542	1610	1322	1692	1184	1474	1138	1114	928	2282	2258	2244	2354	1916	2884	1526	1656	1520	1486	1440	1540	61398	Transferases;Transferring alkyl or aryl groups, other than methyl groups;Transferring alkyl or aryl groups, other than methyl groups (only sub-subclass identified to date);prenyl-phosphate:FMNH2 prenyltransferase	1913.78	1412.67	1550	1255	2323	1528
2.5.1.131	562	474	536	538	774	464	552	518	584	234	210	164	648	452	344	648	598	448	454	448	546	464	438	398	1376	1294	1348	846	866	1162	586	574	612	556	608	584	21908	Transferases;Transferring alkyl or aryl groups, other than methyl groups;Transferring alkyl or aryl groups, other than methyl groups (only sub-subclass identified to date);[5-(aminomethyl)furan-3-yl]methyl-diphosphate:gamma-L-glutamyltyramine [5-(aminomethyl)furan-3-yl]methyltransferase	555.778	202.667	523	458	1148.67	586.667
2.5.1.147	3456	3220	3488	3240	3770	2714	3708	3368	3254	2268	1562	1630	2730	2202	1960	2138	1528	2212	2266	1994	2766	3430	2320	2002	3136	3146	3346	2166	3296	3342	3942	3710	3810	4052	4492	3660	105324	Transferases;Transferring alkyl or aryl groups, other than methyl groups;Transferring alkyl or aryl groups, other than methyl groups (only sub-subclass identified to date);5-amino-6-(D-ribitylamino)uracil:L-tyrosine, 4-hydroxyphenyl transferase	3357.56	1820	2128.33	2463	3072	3944.33
2.5.1.18	17868	15370	17134	16936	21144	13842	17560	17286	16392	12952	8762	8978	16394	11490	9516	11544	10478	9980	9084	7812	9128	12964	10946	9636	10818	10818	11226	8528	12290	12956	11084	9922	10288	11340	14080	10686	447232	Transferases;Transferring alkyl or aryl groups, other than methyl groups;Transferring alkyl or aryl groups, other than methyl groups (only sub-subclass identified to date);RX:glutathione R-transferase	17059.1	10230.7	11567	9928.33	11106	11233.3
2.6.1.108	2094	1878	2208	2092	2558	2114	2224	2254	2202	2246	1790	1686	2522	1610	1476	2024	1864	1726	1940	1762	2072	2362	1664	1266	3056	2954	3234	2598	2808	3452	3224	2934	2964	3268	3362	3086	84574	Transferases;Transferring nitrogenous groups;Transaminases;L-alanine:(5-formylfuran-3-yl)methyl phosphate aminotransferase	2180.44	1907.33	1870.33	1844.33	3017	3139.67
2.6.1.44	6680	5828	6734	6642	7782	6132	7012	7370	6486	4954	3882	4154	7132	5266	4310	5398	4618	4552	4222	3606	4444	5014	4396	3400	6460	6010	6404	5840	6250	7452	4530	4522	4106	4950	4878	4782	196198	Transferases;Transferring nitrogenous groups;Transaminases;L-alanine:glyoxylate aminotransferase	6740.67	4330	5212.67	4180.33	6402.67	4628
2.6.1.45	6680	5828	6734	6642	7782	6132	7012	7370	6486	4954	3882	4154	7132	5266	4310	5398	4618	4552	4222	3606	4444	5014	4396	3400	6460	6010	6404	5840	6250	7452	4530	4522	4106	4950	4878	4782	196198	Transferases;Transferring nitrogenous groups;Transaminases;L-serine:glyoxylate aminotransferase	6740.67	4330	5212.67	4180.33	6402.67	4628
2.6.1.51	6680	5828	6734	6642	7782	6132	7012	7370	6486	4954	3882	4154	7132	5266	4310	5398	4618	4552	4222	3606	4444	5014	4396	3400	6460	6010	6404	5840	6250	7452	4530	4522	4106	4950	4878	4782	196198	Transferases;Transferring nitrogenous groups;Transaminases;L-serine:pyruvate aminotransferase	6740.67	4330	5212.67	4180.33	6402.67	4628
2.6.1.52	4134	3612	4716	4218	4998	4358	4398	4800	4628	4768	3766	3824	5812	4188	3932	5104	5460	4150	3682	3190	3798	5046	3550	3038	6270	6310	6540	6548	7054	8208	6344	5612	5678	6206	7216	5816	180972	Transferases;Transferring nitrogenous groups;Transaminases;O-phospho-L-serine:2-oxoglutarate aminotransferase	4429.11	4119.33	4774.33	3717.33	6821.67	6145.33
2.7.1.11	11726	10216	12678	12662	13876	13358	13242	14348	13048	11472	9564	9672	16922	13498	11044	12426	13258	9918	9834	8782	10566	11732	8578	6748	16302	15334	15740	18482	15958	20418	13622	12618	12756	14274	14442	13002	462116	Transferases;Transferring phosphorus-containing groups;Phosphotransferases with an alcohol group as acceptor;ATP:beta-D-fructose-6-phosphate 1-phosphotransferase	12794.9	10236	12844.3	9373.33	17039	13452.3
2.7.1.146	14	14	28	24	32	22	14	0	6	18	12	20	170	140	98	328	450	304	32	28	26	50	18	12	80	42	48	26	70	54	64	68	66	64	68	56	2566	Transferases;Transferring phosphorus-containing groups;Phosphotransferases with an alcohol group as acceptor;ADP:D-fructose-6-phosphate 1-phosphotransferase	17.1111	16.6667	248.333	27.6667	53.3333	64.3333
2.7.1.147	14	14	28	24	32	22	14	0	6	18	12	20	170	140	98	328	450	304	32	28	26	50	18	12	80	42	48	26	70	54	64	68	66	64	68	56	2566	Transferases;Transferring phosphorus-containing groups;Phosphotransferases with an alcohol group as acceptor;ADP:D-glucose/D-glucosamine 6-phosphotransferase	17.1111	16.6667	248.333	27.6667	53.3333	64.3333
2.7.1.165	4094	3528	4352	4778	4908	4376	4680	4860	4398	3498	2806	3294	5536	4198	3590	3840	3736	3590	3490	2700	3136	3322	2830	2264	5202	5004	4838	6006	4580	6716	3740	3640	3630	3686	3926	3776	146548	Transferases;Transferring phosphorus-containing groups;Phosphotransferases with an alcohol group as acceptor;ATP:D-glycerate 2-phosphotransferase	4441.56	3199.33	4081.67	2957	5391	3733
2.7.1.238	188	210	200	248	252	244	490	426	330	132	146	156	108	156	68	208	210	190	312	170	212	112	180	160	216	190	206	330	240	368	154	186	156	198	188	172	7712	Transferases;Transferring phosphorus-containing groups;Phosphotransferases with an alcohol group as acceptor;ATP:phenol phosphotransferase (AMP-forming)	287.556	144.667	156.667	191	258.333	175.667
2.7.1.28	190	174	154	186	306	108	202	188	194	74	60	82	274	110	164	46	64	80	84	68	78	172	124	64	44	78	42	32	108	66	88	94	92	90	136	82	4198	Transferases;Transferring phosphorus-containing groups;Phosphotransferases with an alcohol group as acceptor;ATP:D-glyceraldehyde 3-phosphotransferase	189.111	72	123	98.3333	61.6667	97
2.7.1.29	190	174	154	186	306	108	202	188	194	74	60	82	274	110	164	46	64	80	84	68	78	172	124	64	44	78	42	32	108	66	88	94	92	90	136	82	4198	Transferases;Transferring phosphorus-containing groups;Phosphotransferases with an alcohol group as acceptor;ATP:glycerone phosphotransferase	189.111	72	123	98.3333	61.6667	97
2.7.1.39	484	422	584	572	568	450	438	480	468	358	364	296	548	416	414	424	458	306	476	434	548	588	412	306	986	992	1028	1012	1026	1346	594	516	578	622	730	600	20844	Transferases;Transferring phosphorus-containing groups;Phosphotransferases with an alcohol group as acceptor;ATP:L-homoserine O-phosphotransferase	496.222	339.333	427.667	460.667	1065	606.667
2.7.1.90	7792	6798	8212	8022	9002	8248	8950	9554	8504	7860	6500	6512	9868	8000	6292	7452	7924	6142	5766	5066	6214	7216	5688	4582	9694	9238	9582	11578	9872	12224	7798	7232	7400	8108	7912	7464	284266	Transferases;Transferring phosphorus-containing groups;Phosphotransferases with an alcohol group as acceptor;diphosphate:D-fructose-6-phosphate 1-phosphotransferase	8342.44	6957.33	7613	5755.33	10364.7	7652.33
2.7.2.1	3330	2860	3622	3648	4202	4016	3678	3908	4060	2338	2128	1932	4964	3778	3094	4048	4384	3744	3106	2754	3318	3886	2462	1918	6106	5698	6094	6538	5758	8088	5120	4708	4558	5330	5848	4694	149718	Transferases;Transferring phosphorus-containing groups;Phosphotransferases with a carboxy group as acceptor;ATP:acetate phosphotransferase	3702.67	2132.67	4002	2907.33	6380.33	5043
2.7.4.31	394	320	408	402	510	332	404	410	350	132	142	102	454	326	288	516	450	376	182	156	194	200	192	138	554	430	500	486	366	580	300	190	282	332	256	286	11940	Transferases;Transferring phosphorus-containing groups;Phosphotransferases with a phosphate group as acceptor;ATP:[5-(aminomethyl)furan-3-yl]methyl-phosphate phosphotransferase	392.222	125.333	401.667	177	486	274.333
2.7.7.105	1346	1226	1414	1270	1392	1208	1264	1528	1330	672	552	552	1904	1286	1040	1398	1182	1166	922	836	1158	1312	734	794	1748	1680	1702	1390	1438	1956	1832	1462	1508	1706	1916	1528	47352	Transferases;Transferring phosphorus-containing groups;Nucleotidyltransferases;GTP:phosphoenolpyruvate guanylyltransferase	1330.89	592	1329.33	959.333	1652.33	1658.67
2.7.7.68	1346	1226	1414	1270	1392	1208	1264	1528	1330	672	552	552	1904	1286	1040	1398	1182	1166	922	836	1158	1312	734	794	1748	1680	1702	1390	1438	1956	1832	1462	1508	1706	1916	1528	47352	Transferases;Transferring phosphorus-containing groups;Nucleotidyltransferases;GTP:2-phospho-L-lactate guanylyltransferase	1330.89	592	1329.33	959.333	1652.33	1658.67
2.7.8.28	2446	2316	2580	2504	2446	2312	2458	2894	2474	1644	1262	1212	2760	2118	1852	2168	1614	1934	1528	1552	2116	2212	1356	1180	2738	2774	2814	2092	2606	3090	2616	2452	2404	2620	2884	2488	80516	Transferases;Transferring phosphorus-containing groups;Transferases for other substituted phosphate groups;(2S)-lactyl-2-diphospho-5'-guanosine:7,8-didemethyl-8-hydroxy-5-deazariboflavin 2-phospho-L-lactate transferase	2492.22	1372.67	2074.33	1657.33	2685.67	2577.33
2.7.9.2	12556	11506	15004	15752	16220	17216	15220	16416	14972	12956	11112	11360	19424	15950	13508	14074	15978	13374	13364	11630	12602	12864	10152	7624	20184	18084	18284	25952	19998	28814	14264	14052	13766	15616	16034	14820	550702	Transferases;Transferring phosphorus-containing groups;Phosphotransferases with paired acceptors;ATP:pyruvate, water phosphotransferase	14984.7	11809.3	15384.7	11372.7	21886	14758.7
2.8.2.14	0	0	2	0	2	4	8	4	0	4	6	0	80	50	64	36	90	38	28	10	34	14	38	42	80	108	54	52	58	82	2	26	12	10	14	20	1072	Transferases;Transferring sulfur-containing groups;Sulfotransferases;3'-phosphoadenylyl-sulfate:glycolithocholate sulfonotransferase	2.22222	3.33333	59.6667	27.6667	72.3333	14
2.8.3.1	2224	1854	2226	2154	2582	2130	2090	2224	2188	2158	1544	1716	2786	2124	1730	1610	1498	1420	1706	1566	1858	1700	2050	1744	2576	2656	2706	2240	2740	3108	2198	2122	2244	2256	2024	2208	75960	Transferases;Transferring sulfur-containing groups;CoA-transferases;acetyl-CoA:propanoate CoA-transferase	2185.78	1806	1861.33	1770.67	2671	2175.33
2.8.3.12	6260	5666	7048	7336	7690	7468	8152	9050	7174	4408	3486	3736	6378	5546	3860	4044	3402	4492	2804	2332	2988	1778	1974	1606	4672	4350	4436	3952	3784	5950	3558	3538	3230	3586	3738	3558	167030	Transferases;Transferring sulfur-containing groups;CoA-transferases;acetyl-CoA:(E)-glutaconate CoA-transferase	7316	3876.67	4620.33	2247	4524	3534.67
2.8.3.15	2356	1976	2322	2436	2834	1690	2852	2754	2462	1000	594	760	828	752	546	428	108	980	638	524	704	532	696	528	1408	1648	1754	1130	1388	1506	654	596	588	550	648	588	43758	Transferases;Transferring sulfur-containing groups;CoA-transferases;succinyl-CoA:(R)-2-benzylsuccinate CoA-transferase	2409.11	784.667	607	603.667	1472.33	604
2.8.3.6	568	450	532	604	570	502	652	596	550	758	416	490	788	488	468	440	456	310	296	244	342	530	258	232	472	432	392	378	542	584	430	408	520	576	1178	586	18038	Transferases;Transferring sulfur-containing groups;CoA-transferases;succinyl-CoA:3-oxoadipate CoA-transferase	558.222	554.667	491.667	317	466.667	616.333
2.8.3.8	124	120	164	242	204	252	168	238	298	82	88	80	232	126	90	216	326	158	150	136	160	116	166	142	432	454	502	720	460	736	188	228	166	214	218	234	8630	Transferases;Transferring sulfur-containing groups;CoA-transferases;acyl-CoA:acetate CoA-transferase	201.111	83.3333	191.333	145	550.667	208
2.8.3.9	116	116	158	230	190	250	154	228	278	80	88	80	222	122	86	214	326	146	142	130	156	114	166	142	422	438	488	714	448	722	186	224	166	214	214	234	8404	Transferases;Transferring sulfur-containing groups;CoA-transferases;butanoyl-CoA:acetoacetate CoA-transferase	191.111	82.6667	186	141.667	538.667	206.333
2.8.4.1	48	34	56	40	58	56	46	62	34	252	168	222	548	452	354	1506	1386	906	6	12	14	28	12	12	2	4	4	16	4	42	272	254	202	310	266	240	7928	Transferases;Transferring sulfur-containing groups;Transferring alkylthio groups;methyl-CoM:CoB S-(2-sulfoethyl)thiotransferase	48.2222	214	858.667	14	12	257.333
3.1.1.17	10872	8754	10160	9962	12596	8774	11188	11502	10500	5366	3776	4258	8940	6634	4786	5626	5204	4988	4020	3628	4370	5880	4358	4134	8254	7822	8286	8442	9164	10756	5562	5010	4946	5308	5978	5328	255132	Hydrolases;Acting on ester bonds;Carboxylic-ester hydrolases;D-glucono-1,5-lactone lactonohydrolase	10478.7	4466.67	6029.67	4398.33	8787.33	5355.33
3.1.1.24	17300	15536	18566	18886	20504	17330	19598	20654	18466	11612	8360	9074	19514	14830	11582	12594	10090	12044	10962	9980	12760	14528	9432	7720	19726	18870	19860	18696	19976	25006	19768	17702	17824	20396	23632	18406	581784	Hydrolases;Acting on ester bonds;Carboxylic-ester hydrolases;4-carboxymethylbut-3-en-4-olide enol-lactonohydrolase	18537.8	9682	13442.3	10897	20355.7	19621.3
3.1.1.45	10350	8794	10148	10176	11650	9450	11106	11290	10224	8164	5690	6018	10208	7790	6458	6642	5916	6356	5842	4810	5932	7718	6548	5474	9346	9280	9590	7550	9098	10786	7078	6510	6678	7104	8292	6956	291022	Hydrolases;Acting on ester bonds;Carboxylic-ester hydrolases;4-carboxymethylenebut-2-en-4-olide lactonohydrolase	10354.2	6624	7228.33	6054	9275	7103
3.1.1.57	1868	1756	1890	1750	2166	1548	1928	1802	1686	782	530	592	970	608	534	504	312	572	232	194	210	300	414	352	586	608	666	428	640	546	390	370	380	340	362	398	29214	Hydrolases;Acting on ester bonds;Carboxylic-ester hydrolases;2-oxo-2H-pyran-4,6-dicarboxylate lactonohydrolase	1821.56	634.667	583.333	283.667	579	373.333
3.1.1.83	4868	4346	5268	5494	5748	5388	5144	5514	5424	5212	4222	4264	7394	5842	4582	4736	4342	4232	3964	3634	4916	4934	3208	2696	7388	7232	7418	5664	6438	7720	7584	6952	6930	7458	8704	7114	201974	Hydrolases;Acting on ester bonds;Carboxylic-ester hydrolases;isoprop(en)ylmethyloxepan-2-one lactonohydrolase	5243.78	4566	5188	3892	6976.67	7457
3.1.1.92	0	0	0	0	0	0	0	0	4	12	2	2	0	0	2	0	0	0	0	0	0	0	0	0	0	0	0	0	0	0	0	0	0	0	0	0	22	Hydrolases;Acting on ester bonds;Carboxylic-ester hydrolases;4-sulfomuconolactone sulfohydrolase	0.444444	5.33333	0.333333	0	0	0
3.1.2.12	752	666	710	816	950	758	654	740	800	868	756	722	1212	776	706	994	1034	676	986	800	896	1364	1064	974	1114	1042	1206	916	1252	1312	1022	886	1104	1074	1468	1022	34092	Hydrolases;Acting on ester bonds;Thioester hydrolases;S-formylglutathione hydrolase	760.667	782	899.667	1014	1140.33	1096
3.1.2.23	632	540	500	588	740	426	722	710	598	356	270	258	396	244	218	264	254	282	128	84	128	128	252	204	154	166	190	170	162	196	226	190	226	168	204	218	11192	Hydrolases;Acting on ester bonds;Thioester hydrolases;4-hydroxybenzoyl-CoA hydrolase	606.222	294.667	276.333	154	173	205.333
3.1.3.11	6564	5384	6598	6670	7436	6798	6880	7280	6778	5394	4160	4050	8120	6430	5280	6004	5876	5182	4072	3704	4422	4564	3806	3262	7140	6658	6736	5512	5928	7482	6028	5518	5468	6536	7462	5534	210716	Hydrolases;Acting on ester bonds;Phosphoric-monoester hydrolases;D-fructose-1,6-bisphosphate 1-phosphohydrolase	6709.78	4534.67	6148.67	3971.67	6576	6091
3.1.3.3	4036	3488	4258	4348	4650	4298	4252	4508	4178	3262	2586	2722	5282	3810	3198	3846	3924	3422	3672	3132	3822	3524	2658	2288	5392	5208	5512	5498	4868	7038	5366	4798	5000	5956	7016	5338	156154	Hydrolases;Acting on ester bonds;Phosphoric-monoester hydrolases;O-phosphoserine phosphohydrolase	4224	2856.67	3913.67	3182.67	5586	5579
3.1.3.37	1378	1198	1280	1350	1626	1062	1548	1566	1374	1600	994	1120	1668	1162	1118	1250	984	1182	750	578	674	870	854	716	952	934	960	792	1016	1108	1086	966	1086	1198	1210	874	40084	Hydrolases;Acting on ester bonds;Phosphoric-monoester hydrolases;sedoheptulose-1,7-bisphosphate 1-phosphohydrolase	1375.78	1238	1227.33	740.333	960.333	1070
3.1.3.41	42	28	16	20	26	26	24	30	20	24	4	10	88	62	48	56	44	40	26	20	30	32	30	20	52	24	32	20	34	28	36	24	48	30	36	62	1192	Hydrolases;Acting on ester bonds;Phosphoric-monoester hydrolases;4-nitrophenylphosphate phosphohydrolase	25.7778	12.6667	56.3333	26.3333	31.6667	39.3333
3.1.3.71	934	936	1138	1128	1054	1202	1014	1118	998	892	676	664	1728	1296	1096	1204	1174	940	944	774	858	912	712	420	1260	1078	1146	2002	1370	2132	1398	1248	1324	1518	1500	1176	40964	Hydrolases;Acting on ester bonds;Phosphoric-monoester hydrolases;(R)-2-phospho-3-sulfolactate phosphohydrolase	1058	744	1239.67	770	1498	1360.67
3.1.3.76	1262	1072	1252	1306	1458	1044	1126	1176	1126	1090	844	798	1410	1062	880	1194	1046	902	1150	962	1340	2092	1164	1114	1934	1788	1894	1350	2114	2050	1548	1602	1660	1608	2018	1548	48984	Hydrolases;Acting on ester bonds;Phosphoric-monoester hydrolases;(9S,10S)-10-hydroxy-9-(phosphooxy)octadecanoate phosphohydrolase	1202.44	910.667	1082.33	1303.67	1855	1664
3.3.2.10	1262	1072	1252	1306	1458	1044	1126	1176	1126	1090	844	798	1410	1062	880	1194	1046	902	1150	962	1340	2092	1164	1114	1934	1788	1894	1350	2114	2050	1548	1602	1660	1608	2018	1548	48984	Hydrolases;Acting on ether bonds;Ether hydrolases;epoxide hydrolase	1202.44	910.667	1082.33	1303.67	1855	1664
3.3.2.9	340	290	328	300	376	258	362	426	358	150	160	92	150	168	86	114	56	130	90	80	134	106	188	208	116	78	46	104	104	114	180	152	136	160	214	154	6508	Hydrolases;Acting on ether bonds;Ether hydrolases;cis-stilbene-oxide hydrolase	337.556	134	117.333	134.333	93.6667	166
3.5.1.4	15886	13872	16424	15892	18284	13892	16566	16594	16010	10378	7654	8098	16874	12968	10534	11422	10174	10572	11038	9896	12890	14376	10652	9010	19288	17924	18852	17320	19148	22240	18604	17000	17036	19278	21006	16482	534134	Hydrolases;Acting on carbon-nitrogen bonds, other than peptide bonds;In linear amides;acylamide amidohydrolase	15935.6	8710	12090.7	11310.3	19128.7	18234.3
3.5.4.27	622	470	612	630	782	554	552	530	566	266	282	238	774	644	336	788	732	662	234	202	304	288	286	238	690	596	614	596	500	796	376	350	386	452	458	454	17860	Hydrolases;Acting on carbon-nitrogen bonds, other than peptide bonds;In cyclic amidines;5,10-methenyltetrahydromethanopterin 10-hydrolase (ring-opening)	590.889	262	656	258.667	632	412.667
3.5.5.1	2092	2016	2260	2262	2758	2224	2650	2744	2422	2904	1952	2372	2212	1616	1282	1362	1482	1546	2192	2038	2224	2552	1810	1320	3400	3306	3574	3208	3334	3842	2324	2098	2092	1972	2130	2060	83632	Hydrolases;Acting on carbon-nitrogen bonds, other than peptide bonds;In nitriles;nitrile aminohydrolase	2380.89	2409.33	1583.33	2022.67	3444	2112.67
3.6.1.7	1180	926	1114	1066	1192	1112	1230	1174	1188	896	714	750	1418	1148	862	1028	1112	944	840	658	856	966	772	590	1530	1338	1348	1510	1418	2046	1254	1070	1026	1150	1410	1150	39986	Hydrolases;Acting on acid anhydrides;In phosphorus-containing anhydrides;acylphosphate phosphohydrolase	1131.33	786.667	1085.33	780.333	1531.67	1176.67
3.7.1.13	122	90	78	70	78	40	76	98	72	46	16	18	50	34	20	42	22	44	86	88	44	92	46	76	122	106	136	160	160	160	104	64	86	62	104	46	2758	Hydrolases;Acting on carbon-carbon bonds;In ketonic substances;(2E,4E)-6-(2-aminophenyl)-2-hydroxy-6-oxohexa-2,4-dienoate acylhydrolase	80.4444	26.6667	35.3333	72	140.667	77.6667
3.7.1.14	4684	4122	4882	5122	5628	4816	4882	5264	4936	2412	1906	2026	4710	3494	2644	3178	2988	3004	2554	2486	2894	3926	2108	1928	4978	4798	4782	4110	4590	5608	4300	3790	4076	4358	5070	4080	141134	Hydrolases;Acting on carbon-carbon bonds;In ketonic substances;(2Z,4E)-2-hydroxy-6-oxona-2,4-dienedioate succinylhydrolase	4926.22	2114.67	3336.33	2649.33	4811	4279
3.7.1.17	1314	1232	1342	1452	1518	1388	1248	1354	1292	746	436	506	1156	954	688	754	760	668	788	686	942	1302	650	630	1500	1434	1344	1272	1396	1608	1582	1252	1360	1524	1624	1388	41090	Hydrolases;Acting on carbon-carbon bonds;In ketonic substances;4,5:9,10-diseco-3-hydroxy-5,9,17-trioxoandrosta-1(10),2-diene-4-oate hydrolase ( (2Z,4Z)-2-hydroxyhexa-2,4-dienoate-forming)	1348.89	562.667	830	833	1425.67	1455
3.7.1.2	2388	2036	2326	2392	2874	2224	2624	2596	2598	2918	1948	2370	3590	2686	1914	3006	3258	2202	1500	1202	1420	2288	1668	1576	2028	1888	1914	1788	2508	2620	2340	2142	2160	2350	2894	2260	82496	Hydrolases;Acting on carbon-carbon bonds;In ketonic substances;4-fumarylacetoacetate fumarylhydrolase	2450.89	2412	2776	1609	2124.33	2357.67
3.7.1.21	714	628	664	654	856	614	910	960	804	1454	958	1056	592	450	462	388	480	400	600	428	504	224	614	622	692	534	546	1372	786	1462	344	354	386	328	340	348	23528	Hydrolases;Acting on carbon-carbon bonds;In ketonic substances;6-oxocyclohex-1-ene-1-carbonyl-CoA hydrolase (ring-opening)	756	1156	462	498.667	898.667	350
3.7.1.25	18	28	26	14	6	14	12	6	10	0	0	0	2	8	2	0	0	2	6	10	16	0	20	12	0	2	12	4	4	6	4	14	6	2	4	4	274	Hydrolases;Acting on carbon-carbon bonds;In ketonic substances;(2Z,4E)-2-hydroxy-6-oxohepta-2,4-dienoate acetylhydrolase	14.8889	0	2.33333	10.6667	4.66667	5.66667
3.7.1.8	82	54	80	76	74	92	104	88	100	108	70	80	86	48	60	34	28	48	58	50	84	66	32	38	290	264	220	208	142	268	86	66	60	74	80	90	3488	Hydrolases;Acting on carbon-carbon bonds;In ketonic substances;2,6-dioxo-6-phenylhexa-3-enoate benzoylhydrolase	83.3333	86	50.6667	54.6667	232	76
3.7.1.9	1806	1414	1950	1938	1906	1912	1860	2078	2034	1142	832	804	2254	1426	1228	1742	1460	1456	1434	1276	1692	1930	1184	1064	2916	2846	2898	2528	2518	3354	2578	2312	2370	2726	3018	2282	70168	Hydrolases;Acting on carbon-carbon bonds;In ketonic substances;2-hydroxymuconate-6-semialdehyde formylhydrolase	1877.56	926	1594.33	1430	2843.33	2547.67
3.8.1.2	5160	4506	4950	5204	5712	4138	5424	5764	5364	3798	2938	2882	4738	3476	2856	3072	2580	2768	2950	2380	2996	3624	3088	2778	4462	4096	4404	3558	4136	5246	3808	3466	3566	3884	4446	3426	141644	Hydrolases;Acting on halide bonds;In carbon-halide compounds;(S)-2-haloacid halidohydrolase	5135.78	3206	3248.33	2969.33	4317	3766
3.8.1.3	2700	2166	2560	2558	2960	1996	2628	2606	2456	1408	980	1056	2474	1804	1238	1328	1146	1214	1440	1306	1508	2002	1464	1096	1906	1724	1808	1660	1946	2168	1636	1394	1548	1512	1564	1478	64438	Hydrolases;Acting on halide bonds;In carbon-halide compounds;haloacetate halidohydrolase	2514.44	1148	1534	1469.33	1868.67	1522
3.8.1.5	4456	3970	4500	4498	5012	4108	4578	4350	4144	4350	3256	3278	6234	4812	4100	4136	2988	3108	3870	3782	4618	6768	3712	3224	6366	5854	6252	5116	6762	7356	6728	6158	5920	6616	7002	5754	177736	Hydrolases;Acting on halide bonds;In carbon-halide compounds;1-haloalkane halidohydrolase	4401.78	3628	4229.67	4329	6284.33	6363
4.1.1.103	442	430	404	436	618	264	486	464	430	28	48	24	116	108	74	28	2	98	10	12	20	12	62	38	42	30	50	12	24	36	62	24	24	40	30	42	5070	Lyases;Carbon-carbon lyases;Carboxy-lyases;2,6-dihydroxybenzoate carboxy-lyase	441.556	33.3333	71	25.6667	32.3333	37
4.1.1.11	234	150	240	246	290	304	136	212	138	520	502	394	316	260	226	510	604	330	404	266	370	710	444	564	712	656	688	650	662	874	454	398	360	440	414	422	15100	Lyases;Carbon-carbon lyases;Carboxy-lyases;L-aspartate 1-carboxy-lyase (beta-alanine-forming)	216.667	472	374.333	459.667	707	414.667
4.1.1.123	478	538	576	512	578	410	602	628	494	406	342	306	342	232	230	242	356	262	164	156	120	38	118	104	390	278	212	638	420	774	138	116	176	132	112	102	11722	Lyases;Carbon-carbon lyases;Carboxy-lyases;4-hydroxybenzoate carboxy-lyase (phenyl phosphate-forming)	535.111	351.333	277.333	116.667	452	129.333
4.1.1.25	234	150	240	246	290	304	136	212	138	520	502	394	316	260	226	510	604	330	404	266	370	710	444	564	712	656	688	650	662	874	454	398	360	440	414	422	15100	Lyases;Carbon-carbon lyases;Carboxy-lyases;L-tyrosine carboxy-lyase (tyramine-forming)	216.667	472	374.333	459.667	707	414.667
4.1.1.31	7760	7000	8300	8224	9728	8444	8148	8454	8670	7578	6474	5820	11654	8888	7494	9128	9648	7036	7002	6296	7828	10396	7086	6126	11816	11388	11930	9586	12090	12884	12078	11250	11080	12398	13634	11220	334536	Lyases;Carbon-carbon lyases;Carboxy-lyases;phosphate:oxaloacetate carboxy-lyase (adding phosphate, phosphoenolpyruvate-forming)	8303.11	6624	8974.67	7455.67	11615.7	11943.3
4.1.1.44	8784	7422	8850	9158	10066	8312	9270	9680	8808	4116	2820	3124	5610	4144	3396	3598	2742	4326	3426	3302	3912	4058	3750	3122	10532	10074	10676	10914	9660	13280	3920	3678	3702	3986	4380	3516	224114	Lyases;Carbon-carbon lyases;Carboxy-lyases;(R)-2-carboxy-2,5-dihydro-5-oxofuran-2-acetate carboxy-lyase (4,5-dihydro-5-oxofuran-2-acetate-forming)	8927.78	3353.33	3969.33	3595	10856	3863.67
4.1.1.46	740	646	814	886	1124	568	890	912	846	68	58	78	260	208	176	74	10	182	36	52	124	68	50	20	46	14	20	16	56	64	250	190	216	242	310	210	10524	Lyases;Carbon-carbon lyases;Carboxy-lyases;2,3-dihydroxybenzoate carboxy-lyase (catechol-forming)	825.111	68	151.667	58.3333	36	236.333
4.1.1.55	2416	1950	2120	2328	2830	1786	2334	2508	2058	1146	824	810	1056	808	660	426	236	676	630	502	470	524	490	460	1100	1032	1220	780	826	1182	394	420	422	428	446	476	38774	Lyases;Carbon-carbon lyases;Carboxy-lyases;4,5-dihydroxyphthalate carboxy-lyase (3,4-dihydroxybenzoate-forming)	2258.89	926.667	643.667	512.667	1023.33	431
4.1.1.59	354	322	354	354	370	340	398	398	288	174	170	168	134	118	52	52	20	98	46	28	32	18	134	138	102	154	108	240	146	268	34	30	32	32	22	18	5746	Lyases;Carbon-carbon lyases;Carboxy-lyases;3,4,5-trihydroxybenzoate carboxy-lyase (1,2,3-trihydroxybenzene-forming)	353.111	170.667	79	66	169.667	28
4.1.1.61	568	466	570	612	706	738	740	830	692	546	320	424	598	572	482	446	504	452	376	378	332	280	356	332	592	626	622	996	754	930	326	310	306	320	318	320	18740	Lyases;Carbon-carbon lyases;Carboxy-lyases;4-hydroxybenzoate carboxy-lyase (phenol-forming)	658	430	509	342.333	753.333	316.667
4.1.1.68	1742	1450	1714	1732	2036	1704	1854	1764	1904	1034	746	746	1812	1324	1068	1076	708	1060	786	740	904	1124	914	694	1336	1366	1448	1226	1244	1476	2462	2124	2268	2590	2740	2096	53012	Lyases;Carbon-carbon lyases;Carboxy-lyases;(3E,5R)-5-carboxy-2-oxohept-3-enedioate carboxy-lyase [(4Z)-2-oxohept-4-enedioate-forming]	1766.67	842	1174.67	860.333	1349.33	2380
4.1.1.69	28	26	48	38	20	34	34	50	30	8	6	4	12	8	10	10	0	6	0	6	6	2	8	0	52	22	36	120	58	142	12	2	20	12	8	20	898	Lyases;Carbon-carbon lyases;Carboxy-lyases;3,4-dihydroxyphthalate carboxy-lyase (3,4-dihydroxybenzoate-forming)	34.2222	6	7.66667	3.66667	71.6667	12.3333
4.1.1.7	1452	1132	1134	1302	1448	998	1324	1508	1310	322	364	342	878	762	562	434	342	612	370	406	454	390	466	394	724	718	738	728	814	898	598	544	650	626	598	646	26988	Lyases;Carbon-carbon lyases;Carboxy-lyases;phenylglyoxylate carboxy-lyase (benzaldehyde-forming)	1289.78	342.667	598.333	413.333	770	610.333
4.1.1.77	738	646	828	856	990	746	944	898	840	398	244	304	566	364	346	408	254	450	68	110	132	306	136	106	402	380	400	216	336	324	436	400	326	452	506	324	16180	Lyases;Carbon-carbon lyases;Carboxy-lyases;(3E)-2-oxohex-3-enedioate carboxy-lyase (2-oxopent-4-enoate-forming)	831.778	315.333	398	143	343	407.333
4.1.1.79	1516	1360	1418	1310	1608	1078	1638	1636	1202	692	554	524	996	730	636	908	662	800	574	502	564	660	688	700	640	498	558	700	716	860	760	688	704	852	852	730	31514	Lyases;Carbon-carbon lyases;Carboxy-lyases;3-sulfopyruvate carboxy-lyase (2-sulfoacetaldehyde-forming)	1418.44	590	788.667	614.667	662	764.333
4.1.2.13	8856	7850	9458	9600	11244	9896	10466	10954	10792	9014	7232	7780	12320	9362	7958	9946	9962	8722	7676	6956	8518	8812	6744	5778	13136	12106	12582	12118	11784	15580	13750	12258	12358	14816	14540	12258	373182	Lyases;Carbon-carbon lyases;Aldehyde-lyases;D-fructose-1,6-bisphosphate D-glyceraldehyde-3-phosphate-lyase (glycerone-phosphate-forming)	9901.78	8008.67	9711.67	7414	12884.3	13330
4.1.2.34	10	6	0	4	6	0	8	12	10	38	18	28	0	2	2	0	0	0	0	2	0	0	10	8	0	0	0	0	0	0	0	0	0	0	0	0	164	Lyases;Carbon-carbon lyases;Aldehyde-lyases;(3Z)-4-(2-carboxyphenyl)-2-oxobut-3-enoate 2-formylbenzoate-lyase (pyruvate-forming)	6.22222	28	0.666667	3.33333	0	0
4.1.2.43	524	384	422	564	518	478	610	528	540	452	366	472	708	586	466	946	848	756	260	238	306	240	186	96	414	304	320	438	298	588	396	380	322	426	458	466	16304	Lyases;Carbon-carbon lyases;Aldehyde-lyases;D-arabino-hex-3-ulose-6-phosphate formaldehyde-lyase (D-ribulose-5-phosphate-forming)	507.556	430	718.333	221	393.667	408
4.1.2.44	982	828	942	1086	1276	898	1272	1208	1136	1178	790	760	962	706	830	658	576	730	518	426	470	644	904	858	698	732	768	476	744	810	768	694	694	728	828	752	29330	Lyases;Carbon-carbon lyases;Aldehyde-lyases;2,3-epoxy-2,3-dihydrobenzoyl-CoA (3Z)-6-oxohex-3-enoyl-CoA-lyase (formate-forming)	1069.78	909.333	743.667	636.667	704.667	744
4.1.2.45	196	176	242	216	266	210	308	302	270	6	8	10	70	56	34	24	4	70	2	4	0	8	12	8	50	102	76	22	60	48	2	0	0	0	4	2	2868	Lyases;Carbon-carbon lyases;Aldehyde-lyases;(3E)-4-(2-hydroxyphenyl)-2-oxobut-3-enoate hydro-lyase	242.889	8	43	5.66667	59.6667	1.33333
4.1.3.17	3514	3186	3552	3684	4112	3550	3954	3932	3718	1788	1400	1608	3054	2180	1692	1690	1344	2116	1650	1562	1860	1756	1610	1316	2788	2664	3014	2422	2704	3302	1966	1858	1820	1814	2010	1924	88114	Lyases;Carbon-carbon lyases;Oxo-acid-lyases;4-hydroxy-4-methyl-2-oxoglutarate pyruvate-lyase (pyruvate-forming)	3689.11	1598.67	2012.67	1625.67	2815.67	1898.67
4.1.3.24	2342	2090	2242	2268	2656	2126	2508	2362	2240	1006	1150	790	2384	1644	1230	1426	1246	1356	1600	1378	1672	1698	1580	1418	2300	2142	2338	1946	2326	2916	2992	2812	2818	3046	3274	2702	74024	Lyases;Carbon-carbon lyases;Oxo-acid-lyases;(S)-malyl-CoA glyoxylate-lyase (acetyl-CoA-forming)	2314.89	982	1547.67	1557.67	2328	2940.67
4.1.3.25	2342	2090	2242	2268	2656	2126	2508	2362	2240	1006	1150	790	2384	1644	1230	1426	1246	1356	1600	1378	1672	1698	1580	1418	2300	2142	2338	1946	2326	2916	2992	2812	2818	3046	3274	2702	74024	Lyases;Carbon-carbon lyases;Oxo-acid-lyases;(3S)-citramalyl-CoA pyruvate-lyase (acetyl-CoA-forming)	2314.89	982	1547.67	1557.67	2328	2940.67
4.1.3.39	636	560	702	652	690	778	682	660	874	420	488	316	916	634	544	726	602	714	302	382	514	332	316	236	1246	1162	1306	932	1098	1132	974	820	934	1128	1728	1184	27320	Lyases;Carbon-carbon lyases;Oxo-acid-lyases;(S)-4-hydroxy-2-oxopentanoate pyruvate-lyase (acetaldehyde-forming)	692.667	408	689.333	347	1146	1128
4.1.3.43	132	96	120	102	128	106	116	62	112	68	58	58	122	122	76	160	180	86	40	76	100	100	82	74	274	228	314	178	220	230	186	118	226	264	818	346	5778	Lyases;Carbon-carbon lyases;Oxo-acid-lyases;(S)-4-hydroxy-2-oxohexanoate pyruvate-lyase (propanal-forming)	108.222	61.3333	124.333	78.6667	240.667	326.333
4.1.99.11	22	10	18	24	14	32	20	16	16	4	0	4	6	18	2	32	82	4	12	2	12	0	4	2	0	0	0	0	0	0	0	2	0	0	0	2	360	Lyases;Carbon-carbon lyases;Other carbon-carbon lyases;benzylsuccinate fumarate-lyase (toluene-forming)	19.1111	2.66667	24	5.33333	0	0.666667
4.2.1.100	490	454	480	586	582	584	652	698	508	468	366	426	272	234	156	166	156	214	256	204	246	70	284	276	536	510	364	834	466	946	166	162	142	174	140	186	13454	Lyases;Carbon-oxygen lyases;Hydro-lyases;6-hydroxycyclohex-1-ene-1-carbonyl-CoA hydro-lyase (cyclohexa-1,5-diene-1-carbonyl-CoA-forming)	559.333	420	199.667	222.667	609.333	161.667
4.2.1.11	7704	6894	7926	7448	8764	7216	8136	8578	8222	7936	5866	6068	10226	7518	6350	7702	7634	6544	6112	5108	6122	7202	5774	5292	9252	8590	8930	10392	9746	12578	9248	8352	8354	9626	10124	8394	285928	Lyases;Carbon-oxygen lyases;Hydro-lyases;2-phospho-D-glycerate hydro-lyase (phosphoenolpyruvate-forming)	7876.44	6623.33	7662.33	5935	9914.67	9016.33
4.2.1.112	260	236	328	350	388	408	388	454	322	232	146	198	174	124	110	78	100	122	402	356	384	370	234	154	484	466	552	544	460	678	166	180	176	116	136	152	10428	Lyases;Carbon-oxygen lyases;Hydro-lyases;acetaldehyde hydro-lyase (acetylene-forming)	348.222	192	118	316.667	530.667	154.333
4.2.1.114	204	220	232	216	234	346	226	242	232	72	94	96	442	276	200	688	684	446	150	116	158	164	84	132	504	482	470	506	320	562	244	204	222	284	266	258	10276	Lyases;Carbon-oxygen lyases;Hydro-lyases;(R)-2-hydroxybutane-1,2,4-tricarboxylate hydro-lyase [(1R,2S)-1-hydroxybutane-1,2,4-tricarboxylate-forming]	239.111	87.3333	456	134	474	246.333
4.2.1.132	98	128	204	138	174	130	104	134	152	48	30	56	94	116	76	140	232	124	126	76	166	120	86	114	242	252	244	192	242	232	198	158	212	172	172	198	5380	Lyases;Carbon-oxygen lyases;Hydro-lyases;4-hydroxy-2-oxohexanoate hydro-lyase [(2Z,4Z)-2-hydroxyhexa-2,4-dienoate-forming]	140.222	44.6667	130.333	114.667	234	185
4.2.1.147	520	406	542	482	570	398	470	420	438	232	232	246	534	428	384	628	600	542	218	160	256	210	174	178	384	242	294	396	348	600	358	340	294	466	406	412	13808	Lyases;Carbon-oxygen lyases;Hydro-lyases;5,6,7,8-tetrahydromethanopterin hydro-lyase (formaldehyde-adding, tetrahydromethanopterin-forming)	471.778	236.667	519.333	199.333	377.333	379.333
4.2.1.17	12720	10766	12478	12380	14476	11190	12512	13268	12510	10390	8284	8360	14914	11260	9830	11262	9862	9898	9588	8660	11252	13168	9692	8220	15668	14738	15340	12970	16062	18540	17474	15826	16612	18588	21962	16526	467246	Lyases;Carbon-oxygen lyases;Hydro-lyases;(3S)-3-hydroxyacyl-CoA hydro-lyase	12477.8	9011.33	11171	10096.7	15553	17831.3
4.2.1.180	2582	2296	2484	2378	2836	1948	2558	2642	2580	552	506	486	1106	930	716	656	280	1212	694	698	924	1096	672	576	1712	1704	1650	1322	1596	1790	1224	1142	1048	1118	1270	1092	50076	Lyases;Carbon-oxygen lyases;Hydro-lyases;(R,S)-2-(alpha-hydroxybenzyl)succinyl-CoA hydro-lyase	2478.22	514.667	816.667	776.667	1629	1149
4.2.1.54	22	16	40	48	62	62	72	78	40	36	8	30	32	22	34	36	64	54	28	42	50	16	14	12	58	40	56	122	42	126	28	46	22	34	34	32	1558	Lyases;Carbon-oxygen lyases;Hydro-lyases;(R)-lactoyl-CoA hydro-lyase (acryloyl-CoA-forming)	48.8889	24.6667	40.3333	27	74	32.6667
4.2.1.80	1892	1590	2002	1876	2222	1542	1756	1756	1918	1430	986	934	1622	1214	910	1038	980	1114	1026	802	1092	1340	1066	962	1644	1760	1734	1132	1716	1812	1378	1240	1406	1584	2176	1540	52192	Lyases;Carbon-oxygen lyases;Hydro-lyases;(S)-4-hydroxy-2-oxopentanoate hydro-lyase ((2Z)-2-hydroxypenta-2,4-dienoate-forming)	1839.33	1116.67	1146.33	1048	1633	1554
4.2.1.83	1646	1578	1934	1684	1970	1444	1952	1904	1944	672	472	572	1246	730	646	664	360	782	342	262	306	394	578	486	602	720	724	514	756	748	518	434	432	514	484	458	31472	Lyases;Carbon-oxygen lyases;Hydro-lyases;(1E,3E)-4-hydroxybuta-1,3-diene-1,2,4-tricarboxylate 1,2-hydro-lyase (2-hydroxy-4-oxobutane-1,2,4-tricarboxylate-forming)	1784	572	738	394.667	677.333	473.333
4.2.1.84	2128	2014	2180	2246	2706	1800	2470	2410	1988	1108	738	700	1840	1336	1054	970	762	962	832	796	914	1228	1118	1008	1338	1202	1378	920	1398	1398	1112	930	948	944	1162	950	48988	Lyases;Carbon-oxygen lyases;Hydro-lyases;aliphatic-amide hydro-lyase (nitrile-forming)	2215.78	848.667	1154	982.667	1272.33	1007.67
4.2.3.153	420	344	462	438	552	384	422	418	458	180	140	158	574	398	300	450	394	326	150	200	232	232	200	154	492	448	518	460	428	526	302	262	266	316	288	300	12592	Lyases;Carbon-oxygen lyases;Acting on phosphates;D-glyceraldehyde-3-phosphate phosphate-lyase [D-glyceraldehyde-3-phosphate-adding; (5-formylfuran-3-yl)methyl-phosphate-forming]	433.111	159.333	407	194.667	478.667	289
4.3.1.32	3382	3118	3358	3110	3692	2586	3540	3294	3184	2202	1502	1608	2616	2142	1830	1782	1204	2040	2128	1920	2656	3386	2224	1922	3120	3122	3312	2144	3240	3292	3916	3666	3780	4028	4416	3628	102090	Lyases;Carbon-nitrogen lyases;Ammonia-lyases;5-amino-5-(4-hydroxybenzyl)-6-(D-ribitylimino)-5,6-dihydrouracil ammonia-lyase (7,8-didemethyl-8-hydroxy-5-deazariboflavin-forming)	3251.56	1770.67	1935.67	2372.67	3038.33	3905.67
4.4.1.19	516	422	450	494	566	432	632	754	480	206	218	202	332	240	260	254	290	262	142	128	148	94	152	156	364	368	378	572	366	580	184	214	190	282	172	202	11702	Lyases;Carbon-sulfur lyases;Carbon-sulfur lyases (only sub-subclass identified to date);(2R)-2-O-phospho-3-sulfolactate hydrogen-sulfite-lyase (phosphoenolpyruvate-forming)	527.333	208.667	273	136.667	438	207.333
4.4.1.22	144	152	122	142	152	104	100	126	114	28	6	14	54	52	38	38	52	62	24	14	6	18	50	60	6	10	6	2	8	6	2	8	8	10	6	4	1748	Lyases;Carbon-sulfur lyases;Carbon-sulfur lyases (only sub-subclass identified to date);S-(hydroxymethyl)glutathione formaldehyde-lyase (glutathione-forming)	128.444	16	49.3333	28.6667	6.33333	6.33333
4.4.1.23	12	10	20	22	22	26	6	48	26	2	6	2	6	18	10	16	4	12	0	0	0	0	0	0	0	0	0	2	0	0	92	58	90	114	94	82	800	Lyases;Carbon-sulfur lyases;Carbon-sulfur lyases (only sub-subclass identified to date);(R)[or (S)]-2-hydroxypropyl-CoM:2-sulfanylethane-1-sulfonate lyase (epoxyalkane-ring-forming)	21.3333	3.33333	11	0	0.333333	88.3333
4.5.1.3	0	2	0	0	0	0	0	0	0	8	4	4	54	20	8	22	12	18	0	0	0	0	0	0	0	0	0	0	0	0	0	0	0	0	0	0	152	Lyases;Carbon-halide lyases;Carbon-halide lyases (only sub-subclass identified to date);dichloromethane chloride-lyase (adding H2O; chloride-hydrolysing; formaldehyde-forming)	0.222222	5.33333	22.3333	0	0	0
4.6.1.15	190	174	154	186	306	108	202	188	194	74	60	82	274	110	164	46	64	80	84	68	78	172	124	64	44	78	42	32	108	66	88	94	92	90	136	82	4198	Lyases;Phosphorus-oxygen lyases;Phosphorus-oxygen lyases (only sub-subclass identified to date);FAD AMP-lyase (riboflavin-cyclic-4',5'-phosphate-forming)	189.111	72	123	98.3333	61.6667	97
5.1.2.2	1266	1244	1282	1370	1890	1068	1678	1774	1512	962	568	732	986	582	494	486	374	560	360	284	278	304	424	306	270	258	254	160	236	278	354	316	332	342	412	316	24312	Isomerases;Racemases and epimerases;Acting on hydroxy acids and derivatives;mandelate racemase	1453.78	754	580.333	326	242.667	345.333
5.1.2.3	6440	5154	6200	5972	7392	5734	6332	6706	6180	7080	5618	5842	9254	6658	5894	7444	6922	5984	5872	5108	6750	8288	6262	5412	8414	7780	8136	7226	8682	9878	11010	10038	10600	11196	13606	10454	271518	Isomerases;Racemases and epimerases;Acting on hydroxy acids and derivatives;3-hydroxybutanoyl-CoA 3-epimerase	6234.44	6180	7026	6282	8352.67	11150.7
5.2.1.2	320	258	322	308	358	218	302	310	300	326	258	296	530	348	246	264	298	166	186	160	202	308	244	242	328	280	292	272	394	320	356	322	358	438	852	382	11364	Isomerases;cis-trans-Isomerases;cis-trans Isomerases (only sub-subclass identified to date);4-maleylacetoacetate cis-trans-isomerase	299.556	293.333	308.667	223.667	314.333	451.333
5.3.1.27	418	366	470	508	454	554	586	620	530	442	362	428	534	452	344	826	710	732	374	314	360	288	210	112	508	390	470	436	332	570	476	460	394	494	462	544	16530	Isomerases;Intramolecular oxidoreductases;Interconverting aldoses and ketoses, and related compounds;D-arabino-hex-3-ulose-6-phosphate isomerase	500.667	410.667	599.667	276.333	451	471.667
5.3.2.6	528	426	526	468	628	548	554	604	656	270	224	192	496	348	254	372	396	364	386	318	332	328	292	246	744	642	722	630	634	960	340	288	334	340	432	374	16196	Isomerases;Intramolecular oxidoreductases;Interconverting keto- and enol-groups;(2Z,4E)-2-hydroxyhexa-2,4-dienedioate keto---enol isomerase	548.667	228.667	371.667	317	722	351.333
5.3.2.8	1288	1064	1322	1206	1366	1008	1126	1072	1206	338	252	288	858	520	442	322	284	420	310	230	270	556	498	420	554	604	582	296	498	578	306	318	296	316	368	288	21670	Isomerases;Intramolecular oxidoreductases;Interconverting keto- and enol-groups;4-oxalomesaconate keto---enol-isomerase	1184.22	292.667	474.333	380.667	518.667	315.333
5.3.3.10	292	218	282	272	398	346	298	296	254	46	54	28	182	134	100	106	56	126	46	30	42	62	44	88	172	176	150	174	202	244	136	112	124	120	320	146	5876	Isomerases;Intramolecular oxidoreductases;Transposing C=C bonds;5-carboxymethyl-2-hydroxymuconate Delta2,Delta4-2-oxo,Delta3-isomerase	295.111	42.6667	117.333	52	186.333	159.667
5.3.3.4	56	52	60	44	56	38	54	54	26	8	6	0	60	20	36	34	12	52	12	8	4	14	20	14	10	20	10	8	6	18	16	8	32	38	238	66	1210	Isomerases;Intramolecular oxidoreductases;Transposing C=C bonds;(+)-muconolactone Delta3-Delta2-isomerase	48.8889	4.66667	35.6667	12	12	66.3333
5.3.3.8	2296	2106	2412	2520	3024	2288	2460	2628	2516	2646	2032	2018	3486	2456	2134	2576	2508	1944	2292	1776	2440	2672	2096	1852	3372	2984	3188	3700	3734	4498	3518	3196	3506	3724	4698	3600	100896	Isomerases;Intramolecular oxidoreductases;Transposing C=C bonds;(3Z/3E)-alk-3-enoyl-CoA (2E)-isomerase	2472.22	2232	2517.33	2188	3579.33	3707
5.3.99.2	422	294	380	316	488	302	328	312	352	348	316	252	384	276	152	232	172	198	208	148	258	208	240	160	306	338	338	258	332	416	74	88	58	62	56	70	9142	Isomerases;Intramolecular oxidoreductases;Other intramolecular oxidoreductases;(5Z,13E,15S)-9alpha,11alpha-epidioxy-15-hydroxyprosta-5,13-dienoate D-isomerase	354.889	305.333	235.667	203.667	331.333	68
5.4.2.11	4844	4548	4982	5238	5702	5064	4816	5496	5318	4890	3726	3662	7412	5618	4728	5252	4844	4358	3750	3356	4136	5082	3400	2858	6944	6308	6730	5792	6486	7958	7284	6662	6952	7544	8142	6738	196620	Isomerases;Intramolecular transferases;Phosphotransferases (phosphomutases);D-phosphoglycerate 2,3-phosphomutase (2,3-diphosphoglycerate-dependent)	5112	4092.67	5368.67	3763.67	6703	7220.33
5.4.2.12	6412	5534	7146	7190	7268	7648	7310	8164	7284	5392	4694	4260	8650	7354	6098	7662	8578	6650	6338	5422	6250	6140	4994	4300	11532	10792	10906	13040	10680	14794	6694	6098	6080	6678	7362	6466	267860	Isomerases;Intramolecular transferases;Phosphotransferases (phosphomutases);D-phosphoglycerate 2,3-phosphomutase (2,3-diphosphoglycerate-independent)	7106.22	4782	7498.67	5574	11957.3	6563
5.4.4.1	40	56	58	68	70	48	60	52	44	42	36	52	56	40	42	76	144	74	58	32	64	42	62	82	26	26	26	42	28	40	22	34	14	40	26	36	1758	Isomerases;Intramolecular transferases;Transferring hydroxy groups;(hydroxyamino)benzene hydroxymutase	55.1111	43.3333	72	56.6667	31.3333	28.6667
5.4.4.3	166	148	134	170	218	110	216	174	168	878	522	570	644	286	314	300	308	154	34	18	30	30	72	44	8	28	36	16	28	34	198	220	246	218	200	154	7094	Isomerases;Intramolecular transferases;Transferring hydroxy groups;3-(hydroxyamino)phenol hydroxymutase	167.111	656.667	334.333	38	25	206
5.5.1.1	1092	1054	914	1086	1070	810	1178	1236	1018	726	498	544	926	632	462	582	500	616	406	342	392	528	372	328	478	378	386	358	592	600	656	528	622	736	1480	748	24874	Isomerases;Intramolecular lyases;Intramolecular lyases (only sub-subclass identified to date);(+)-muconolactone lyase (ring-opening)	1050.89	589.333	619.667	394.667	465.333	795
5.5.1.2	2124	1898	2158	2152	2182	1972	2308	2312	2218	558	400	432	1264	924	670	662	458	836	480	464	540	832	558	660	698	586	688	508	838	898	746	636	694	830	1248	798	38230	Isomerases;Intramolecular lyases;Intramolecular lyases (only sub-subclass identified to date);2-carboxy-2,5-dihydro-5-oxofuran-2-acetate lyase (ring-opening)	2147.11	463.333	802.333	589	702.667	825.333
5.5.1.5	0	0	0	0	0	0	0	0	0	0	0	0	0	0	0	0	0	12	0	0	0	0	0	0	0	0	0	0	0	0	0	0	0	0	0	0	12	Isomerases;Intramolecular lyases;Intramolecular lyases (only sub-subclass identified to date);3-carboxy-2,5-dihydro-5-oxofuran-2-acetate lyase (ring-opening)	0	0	2	0	0	0
5.5.1.7	16	8	12	8	12	4	10	16	14	0	0	0	2	10	2	4	0	2	2	0	0	0	0	0	2	0	0	0	4	4	0	2	0	0	0	4	138	Isomerases;Intramolecular lyases;Intramolecular lyases (only sub-subclass identified to date);(2R)-2-chloro-2,5-dihydro-5-oxofuran-2-acetate lyase (ring-opening)	11.1111	0	3.33333	0.333333	1.66667	1
5.99.1.4	1110	912	948	950	1214	768	1168	1060	934	1038	628	676	976	662	532	500	472	466	572	402	604	820	626	614	932	962	988	668	966	988	670	594	600	592	626	580	27818	Isomerases;Other isomerases;Sole sub-subclass for isomerases that do not belong in the other subclasses;2-hydroxy-2H-chromene-2-carboxylate---(3E)-4-(2-hydroxyphenyl)-2-oxobut-3-enoate isomerase	1007.11	780.667	601.333	606.333	917.333	610.333
6.2.1.1	19578	16980	19668	20202	22294	18348	21072	21142	20814	18448	14386	14622	26200	19472	16968	19414	18628	17120	14304	11822	14552	18638	14596	12764	19224	18888	20014	19968	20834	25118	26206	23542	24464	28140	30606	24344	713380	Ligases;Forming carbon-sulfur bonds;Acid-thiol ligases;acetate:CoA ligase (AMP-forming)	20010.9	15818.7	19633.7	14446	20674.3	26217
6.2.1.20	4484	3774	4264	4572	5900	4558	4634	5066	5076	3088	2960	2322	4796	3210	2882	3056	3194	2640	2520	2278	2758	3152	2734	2562	4980	4770	4786	3912	4456	4792	3522	3090	3156	3416	3982	3240	134582	Ligases;Forming carbon-sulfur bonds;Acid-thiol ligases;long-chain-fatty-acid:[acyl-carrier protein] ligase (AMP-forming)	4703.11	2790	3296.33	2667.33	4616	3401
6.2.1.25	2032	1664	1994	1888	2492	1490	2550	2416	2106	1508	1098	1100	1468	1224	1040	1030	864	1094	992	862	928	942	1318	1156	1064	1038	1280	958	1280	1384	1108	990	1078	1118	1094	970	48618	Ligases;Forming carbon-sulfur bonds;Acid-thiol ligases;benzoate:CoA ligase (AMP-forming)	2070.22	1235.33	1120	1033	1167.33	1059.67
6.2.1.27	970	798	898	856	1232	702	1104	1100	950	508	422	432	712	574	544	540	480	640	628	616	670	736	720	692	714	664	808	600	818	926	858	788	838	934	914	768	27154	Ligases;Forming carbon-sulfur bonds;Acid-thiol ligases;4-hydroxybenzoate:CoA ligase (AMP-forming)	956.667	454	581.667	677	755	850
6.2.1.3	47468	41292	50054	48566	54600	49048	48828	50898	49144	38274	30330	30372	55698	42306	36202	39354	39128	36678	38346	32922	41018	42064	32254	26448	60856	58502	60614	63478	62234	78814	55010	50480	50676	56958	59116	50408	1708438	Ligases;Forming carbon-sulfur bonds;Acid-thiol ligases;long-chain fatty acid:CoA ligase (AMP-forming)	48877.6	32992	41561	35508.7	64083	53774.7
6.2.1.32	852	806	904	972	1144	846	1232	1200	912	1134	732	770	866	594	496	688	550	632	388	342	344	300	508	398	122	140	134	124	136	244	570	504	544	666	608	592	21994	Ligases;Forming carbon-sulfur bonds;Acid-thiol ligases;anthranilate:CoA ligase (AMP-forming)	985.333	878.667	637.667	380	150	580.667
6.2.1.37	56	68	34	54	84	40	78	72	40	8	2	2	6	8	8	0	0	10	2	2	2	0	32	42	6	0	0	0	0	8	0	8	2	8	2	10	694	Ligases;Forming carbon-sulfur bonds;Acid-thiol ligases;3-hydroxybenzoate:CoA ligase (AMP-forming)	58.4444	4	5.33333	13.3333	2.33333	5
6.2.1.9	1078	866	972	996	1352	922	1082	1028	1142	692	660	578	1108	742	622	812	762	748	538	524	548	640	746	824	594	538	606	376	634	588	976	964	958	1082	1146	1010	29454	Ligases;Forming carbon-sulfur bonds;Acid-thiol ligases;malate:CoA ligase (ADP-forming)	1048.67	643.333	799	636.667	556	1022.67
6.3.2.31	2444	1946	2434	2384	2820	2364	2418	2406	2382	1502	1176	1190	3002	2278	1832	2302	1820	1986	1414	1462	1980	2248	1296	1390	2808	2802	2906	2490	2600	3344	3094	2824	2812	3242	3304	2850	83552	Ligases;Forming carbon-nitrogen bonds;Acid-D-amino-acid ligases (peptide synthases);L-glutamate:coenzyme F420-0 ligase (GDP-forming)	2399.78	1289.33	2203.33	1631.67	2825	3021
6.3.2.32	188	132	168	268	210	216	156	228	166	158	124	194	166	168	128	106	114	184	428	252	322	134	170	150	374	306	292	296	376	490	350	362	320	238	226	356	8516	Ligases;Forming carbon-nitrogen bonds;Acid-D-amino-acid ligases (peptide synthases);L-glutamate:coenzyme gamma-F420-2 (ADP-forming)	192.444	158.667	144.333	242.667	355.667	308.667
6.3.2.34	2444	1946	2434	2384	2820	2364	2418	2406	2382	1502	1176	1190	3002	2278	1832	2302	1820	1986	1414	1462	1980	2248	1296	1390	2808	2802	2906	2490	2600	3344	3094	2824	2812	3242	3304	2850	83552	Ligases;Forming carbon-nitrogen bonds;Acid-D-amino-acid ligases (peptide synthases);L-glutamate:coenzyme F420-1 ligase (GDP-forming)	2399.78	1289.33	2203.33	1631.67	2825	3021
6.3.4.24	180	166	190	210	252	138	170	126	160	80	90	98	348	176	148	392	334	332	72	58	86	90	190	124	116	108	118	118	136	200	108	102	138	168	174	130	5826	Ligases;Forming carbon-nitrogen bonds;Other carbon-nitrogen ligases;tyramine:L-glutamate gamma-ligase (ADP-forming)	176.889	89.3333	288.333	103.333	132.667	136.667
6.4.1.8	202	232	254	274	296	208	428	412	338	120	90	114	60	28	38	20	2	54	138	136	170	58	58	42	188	144	142	152	104	138	48	76	56	58	70	104	5052	Ligases;Forming carbon-carbon bonds;Ligases that form carbon-carbon bonds (only sub-subclass identified to date);acetophenone:carbon-dioxide ligase (ADP-forming)	293.778	108	33.6667	100.333	144.667	68.6667
7.2.4.1	1044	970	1330	1336	1296	1540	1142	1368	1300	1514	1596	1200	2014	1728	1280	1976	2570	1574	1026	816	918	944	842	806	2448	2274	2364	3036	2144	3644	1126	1094	1064	1162	1086	1180	54752	Translocases;Catalysing the translocation of inorganic cations;Linked to decarboxylation;carboxybiotinyl-[protein] carboxy-lyase	1258.44	1436.67	1857	892	2651.67	1118.67
7.2.4.5	216	204	262	302	298	396	300	336	284	474	458	398	246	214	198	158	312	248	402	368	368	132	290	224	830	656	766	1292	856	1476	304	270	300	362	306	368	14874	Translocases;Catalysing the translocation of inorganic cations;Linked to decarboxylation;(2E)-4-carboxybut-2-enoyl-CoA carboxy-lyase [(2E)-but-2-enoyl-CoA-forming]	288.667	443.333	229.333	297.333	979.333	318.333
