# Supplementary material for: Divergent microbial community and functional dynamics in mangrove sediments along a polycyclic aromatic hydrocarbons (PAHs) gradient in China
Source: Research Square preprint supplement (doi:10.21203/rs.3.rs-7178259/v1), 2025-09-17
Supplement: Supplementary file 12 [file 94267bbfb565aaf0fc9f1fab.xlsx]

## Sheet: Summary
Samples	Insert Size (bp)	Read length (bp)	Raw reads	Raw base (bp)	Clean reads	Clean base(bp)	Percent in raw reads(%)	Percent in raw bases(%)
CPT_LW_1	440	150	89643084	13536105684	88539832	13320840172	98.7693	98.4097
CPT_LW_2	434	150	84108896	12700443296	83113568	12503016864	98.8166	98.4455
CPT_LW_3	429	150	91668168	13841893368	90686100	13630940758	98.9287	98.476
CPT_MZ_1	444	150	87322944	13185764544	86403542	12992531742	98.9471	98.5345
CPT_MZ_2	445	150	91593160	13830567160	90576534	13638481045	98.8901	98.6111
CPT_MZ_3	448	150	86187734	13014347834	85258908	12841336425	98.9223	98.6706
CPT_SW_1	443	150	84434936	12749675336	83398092	12559265215	98.772	98.5065
CPT_SW_2	447	150	91745008	13853496208	90671698	13656335202	98.8301	98.5768
CPT_SW_3	449	150	86363116	13040830516	85264156	12839669824	98.7275	98.4575
DY_1	492	150	94452604	14262343204	93224704	14032870909	98.7	98.3911
DY_2	471	150	89562718	13523970418	88437612	13301660884	98.7438	98.3562
DY_3	485	150	89047588	13446185788	88035458	13252943998	98.8634	98.5629
FG_SC_1	470	150	102746354	15514699454	101394372	15246181952	98.6842	98.2693
FG_SC_2	428	150	87592624	13226486224	86501770	13014191849	98.7546	98.3949
FG_SC_3	428	150	80397658	12140046358	79349222	11938591131	98.6959	98.3406
FG_WR_1	449	150	80149622	12102592922	79157914	11913889485	98.7627	98.4408
FG_WR_2	433	150	82669354	12483072454	81738914	12294785721	98.8745	98.4917
FG_WR_3	423	150	80794896	12200029296	79752572	11997032483	98.7099	98.3361
M1_1_1	502	150	100427112	15164493912	98501648	14743072376	98.0827	97.221
M1_1_2	495	150	82828256	12507066656	81339318	12172492090	98.2024	97.3249
M1_1_3	495	150	94653796	14292723196	92894256	13900638022	98.1411	97.2567
M1_2_1	491	150	87438104	13203153704	85838610	12852735344	98.1707	97.3459
M1_2_2	487	150	110067106	16620133006	107958838	16111535430	98.0846	96.9399
M1_2_3	487	150	110522166	16688847066	108376124	16138019258	98.0583	96.6994
M2_1_1	487	150	84675682	12786027982	83137920	12441610398	98.1839	97.3063
M2_1_2	498	150	83020278	12536061978	81138722	12134877316	97.7336	96.7998
M2_1_3	498	150	84778996	12801628396	82971852	12417363919	97.8684	96.9983
M2_2_1	498	150	91237582	13776874882	89624998	13394737358	98.2325	97.2262
M2_2_2	498	150	97450656	14715049056	95575034	14293031564	98.0753	97.1321
M2_2_3	429	150	114928506	17354204406	113194846	16760933864	98.4915	96.5814
M3_1_1	485	150	88565500	13373390500	86567674	12932819637	97.7442	96.7056
M3_1_2	485	150	84384400	12742044400	81854614	12227836242	97.0021	95.9645
M3_1_3	485	150	83541744	12614803344	81425938	12168778820	97.4674	96.4643
M3_2_1	485	150	91939180	13882816180	89800840	13417385530	97.6742	96.6474
M3_2_2	485	150	95984936	14493725336	93872940	14030981951	97.7997	96.8073
M3_2_3	485	150	86462908	13055899108	84570540	12642189516	97.8114	96.8312
			3253387372		3200149680		98.3636
