# Supplementary material for: Divergent microbial community and functional dynamics in mangrove sediments along a polycyclic aromatic hydrocarbons (PAHs) gradient in China
Source: Research Square preprint supplement (doi:10.21203/rs.3.rs-7178259/v1), 2025-09-17
Supplement: Supplementary file 13 [file a80b06e02b52b269ca6ea73a.xlsx]

## Sheet: 44975species
Domain	Kingdom	Phylum	Class	Order	Family	Genus	Species	DY_1	DY_2	DY_3	CPT_LW_1	CPT_LW_2	CPT_LW_3	CPT_MZ_1	CPT_MZ_2	CPT_MZ_3	CPT_SW_1	CPT_SW_2	CPT_SW_3	FG_SC_1	FG_SC_2	FG_SC_3	FG_WR_1	FG_WR_2	FG_WR_3	M1_1_1	M1_1_2	M1_1_3	M1_2_1	M1_2_2	M1_2_3	M2_1_1	M2_1_2	M2_1_3	M2_2_1	M2_2_2	M2_2_3	M3_1_1	M3_1_2	M3_1_3	M3_2_1	M3_2_2	M3_2_3	Total
d__Archaea	k__unclassified_d__Archaea	p__Candidatus_Aenigmarchaeota	c__unclassified_p__Candidatus_Aenigmarchaeota	o__unclassified_p__Candidatus_Aenigmarchaeota	f__unclassified_p__Candidatus_Aenigmarchaeota	g__unclassified_p__Candidatus_Aenigmarchaeota	s__Candidatus_Aenigmarchaeota_archaeon	5216	4174	4866	5098	4628	6364	6758	7258	7314	6996	8276	6444	5788	5354	3816	4194	5334	4248	6272	5090	6098	2956	3864	3532	9000	7774	7878	13530	8008	14408	3932	4038	3596	4094	4210	4240	214646
d__Archaea	k__unclassified_d__Archaea	p__Candidatus_Aenigmarchaeota	c__unclassified_p__Candidatus_Aenigmarchaeota	o__unclassified_p__Candidatus_Aenigmarchaeota	f__unclassified_p__Candidatus_Aenigmarchaeota	g__unclassified_p__Candidatus_Aenigmarchaeota	s__Candidatus_Aenigmarchaeota_archaeon_CG01_land_8_20_14_3_00_37_9	6	0	2	0	4	2	2	0	0	2	8	22	2	2	0	0	2	0	0	2	0	0	0	0	2	2	0	2	0	4	2	6	0	0	0	0	74
d__Archaea	k__unclassified_d__Archaea	p__Candidatus_Aenigmarchaeota	c__unclassified_p__Candidatus_Aenigmarchaeota	o__unclassified_p__Candidatus_Aenigmarchaeota	f__unclassified_p__Candidatus_Aenigmarchaeota	g__unclassified_p__Candidatus_Aenigmarchaeota	s__Candidatus_Aenigmarchaeota_archaeon_CG1_02_38_14	0	0	0	0	0	0	6	10	2	2	0	2	0	6	0	0	0	0	0	0	0	0	0	0	0	6	0	2	6	4	0	2	0	0	0	0	48
d__Archaea	k__unclassified_d__Archaea	p__Candidatus_Aenigmarchaeota	c__unclassified_p__Candidatus_Aenigmarchaeota	o__unclassified_p__Candidatus_Aenigmarchaeota	f__unclassified_p__Candidatus_Aenigmarchaeota	g__unclassified_p__Candidatus_Aenigmarchaeota	s__Candidatus_Aenigmarchaeota_archaeon_CG_4_10_14_0_8_um_filter_37_24	0	0	0	0	0	0	0	0	0	0	0	0	0	0	0	0	0	0	0	0	0	0	0	0	0	0	0	2	2	0	0	0	0	0	0	0	4
d__Archaea	k__unclassified_d__Archaea	p__Candidatus_Aenigmarchaeota	c__unclassified_p__Candidatus_Aenigmarchaeota	o__unclassified_p__Candidatus_Aenigmarchaeota	f__unclassified_p__Candidatus_Aenigmarchaeota	g__unclassified_p__Candidatus_Aenigmarchaeota	s__Candidatus_Aenigmarchaeota_archaeon_CG_4_10_14_3_um_filter_37_21	0	0	0	4	0	0	2	0	0	6	8	2	0	0	0	0	0	0	0	0	0	0	0	0	0	0	0	0	0	0	0	0	0	0	0	0	22
d__Archaea	k__unclassified_d__Archaea	p__Candidatus_Aenigmarchaeota	c__unclassified_p__Candidatus_Aenigmarchaeota	o__unclassified_p__Candidatus_Aenigmarchaeota	f__unclassified_p__Candidatus_Aenigmarchaeota	g__unclassified_p__Candidatus_Aenigmarchaeota	s__Candidatus_Aenigmarchaeota_archaeon_CG_4_8_14_3_um_filter_37_24	0	0	0	0	0	0	0	0	0	0	0	0	0	8	0	2	0	0	0	0	0	0	0	0	0	0	0	0	0	0	0	0	0	0	0	0	10
d__Archaea	k__unclassified_d__Archaea	p__Candidatus_Aenigmarchaeota	c__unclassified_p__Candidatus_Aenigmarchaeota	o__unclassified_p__Candidatus_Aenigmarchaeota	f__unclassified_p__Candidatus_Aenigmarchaeota	g__unclassified_p__Candidatus_Aenigmarchaeota	s__Candidatus_Aenigmarchaeota_archaeon_ex4484_14	0	2	0	8	14	14	16	8	16	24	0	12	2	4	2	0	8	6	0	0	0	0	0	0	6	6	6	0	4	4	2	0	0	0	0	0	164
d__Archaea	k__unclassified_d__Archaea	p__Candidatus_Aenigmarchaeota	c__unclassified_p__Candidatus_Aenigmarchaeota	o__unclassified_p__Candidatus_Aenigmarchaeota	f__unclassified_p__Candidatus_Aenigmarchaeota	g__unclassified_p__Candidatus_Aenigmarchaeota	s__Candidatus_Aenigmarchaeota_archaeon_ex4484_224	0	0	0	0	0	0	0	0	0	0	0	0	0	0	0	0	0	0	0	0	0	0	0	0	10	4	0	0	0	0	0	0	0	0	0	0	14
d__Archaea	k__unclassified_d__Archaea	p__Candidatus_Aenigmarchaeota	c__unclassified_p__Candidatus_Aenigmarchaeota	o__unclassified_p__Candidatus_Aenigmarchaeota	f__unclassified_p__Candidatus_Aenigmarchaeota	g__unclassified_p__Candidatus_Aenigmarchaeota	s__Candidatus_Aenigmarchaeota_archaeon_ex4484_52	4	12	24	4	2	10	6	14	0	0	8	2	78	74	54	42	16	8	14	10	38	16	0	4	8	20	20	4	10	12	48	42	38	50	42	54	788
d__Archaea	k__unclassified_d__Archaea	p__Candidatus_Aenigmarchaeota	c__unclassified_p__Candidatus_Aenigmarchaeota	o__unclassified_p__Candidatus_Aenigmarchaeota	f__unclassified_p__Candidatus_Aenigmarchaeota	g__unclassified_p__Candidatus_Aenigmarchaeota	s__Candidatus_Aenigmarchaeota_archaeon_ex4484_56	0	0	0	0	0	0	0	0	0	0	0	0	0	2	0	0	6	0	0	0	0	0	0	2	6	2	0	2	2	6	0	0	0	0	0	0	28
d__Archaea	k__unclassified_d__Archaea	p__Candidatus_Altiarchaeota	c__unclassified_p__Candidatus_Altiarchaeota	o__Candidatus_Altiarchaeales	f__unclassified_o__Candidatus_Altiarchaeales	g__Candidatus_Altarchaeum	s__Candidatus_Altarchaeum_hamiconexum	10	8	6	10	28	64	36	54	46	58	70	80	2	18	20	6	8	28	28	12	6	0	4	10	10	18	12	80	52	56	14	10	8	4	8	8	892
d__Archaea	k__unclassified_d__Archaea	p__Candidatus_Altiarchaeota	c__unclassified_p__Candidatus_Altiarchaeota	o__Candidatus_Altiarchaeales	f__unclassified_o__Candidatus_Altiarchaeales	g__Candidatus_Altarchaeum	s__Candidatus_Altarchaeum_sp.	6	6	10	0	0	0	0	0	0	2	2	4	0	0	0	6	0	0	0	0	0	0	0	0	0	0	0	12	12	4	4	2	4	8	2	2	86
d__Archaea	k__unclassified_d__Archaea	p__Candidatus_Altiarchaeota	c__unclassified_p__Candidatus_Altiarchaeota	o__Candidatus_Altiarchaeales	f__unclassified_o__Candidatus_Altiarchaeales	g__Candidatus_Altarchaeum	s__Candidatus_Altarchaeum_sp._CG03_land_8_20_14_0_80_32_618	0	0	0	0	0	2	0	0	0	0	0	0	0	0	0	0	0	0	0	2	0	0	0	0	0	0	0	0	0	0	0	8	2	2	2	0	18
d__Archaea	k__unclassified_d__Archaea	p__Candidatus_Altiarchaeota	c__unclassified_p__Candidatus_Altiarchaeota	o__Candidatus_Altiarchaeales	f__unclassified_o__Candidatus_Altiarchaeales	g__Candidatus_Altarchaeum	s__Candidatus_Altarchaeum_sp._CG12_big_fil_rev_8_21_14_0_65_33_22	4	2	8	4	6	2	0	0	22	10	10	4	0	0	0	0	0	0	4	4	0	12	0	0	0	0	0	0	2	2	0	0	0	2	0	0	98
d__Archaea	k__unclassified_d__Archaea	p__Candidatus_Altiarchaeota	c__unclassified_p__Candidatus_Altiarchaeota	o__Candidatus_Altiarchaeales	f__unclassified_o__Candidatus_Altiarchaeales	g__Candidatus_Altarchaeum	s__Candidatus_Altarchaeum_sp._CG2_30_32_3053	26	10	18	2	10	4	16	6	8	12	16	6	2	6	8	4	16	0	16	6	18	4	0	16	14	10	16	10	4	32	16	6	12	2	14	2	368
d__Archaea	k__unclassified_d__Archaea	p__Candidatus_Altiarchaeota	c__unclassified_p__Candidatus_Altiarchaeota	o__Candidatus_Altiarchaeales	f__unclassified_o__Candidatus_Altiarchaeales	g__Candidatus_Altarchaeum	s__Candidatus_Altarchaeum_sp._CG_4_10_14_0_8_um_filter_32_851	0	0	0	8	16	34	14	16	24	26	22	30	8	6	6	0	0	4	0	0	0	0	0	0	0	0	0	0	0	0	0	0	0	0	0	0	214
d__Archaea	k__unclassified_d__Archaea	p__Candidatus_Altiarchaeota	c__unclassified_p__Candidatus_Altiarchaeota	o__Candidatus_Altiarchaeales	f__unclassified_o__Candidatus_Altiarchaeales	g__Candidatus_Altarchaeum	s__Candidatus_Altarchaeum_sp._CG_4_8_14_3_um_filter_33_2054	0	0	0	0	0	0	0	0	0	0	0	0	0	0	0	0	0	0	0	0	0	0	0	0	0	4	0	4	0	4	0	0	0	0	0	0	12
d__Archaea	k__unclassified_d__Archaea	p__Candidatus_Altiarchaeota	c__unclassified_p__Candidatus_Altiarchaeota	o__Candidatus_Altiarchaeales	f__unclassified_o__Candidatus_Altiarchaeales	g__unclassified_o__Candidatus_Altiarchaeales	s__Candidatus_Altiarchaeales_archaeon	1134	1074	1036	1444	1242	1828	2004	1726	2134	1622	1718	1640	2104	2074	1624	1792	3304	1552	1352	1114	1550	702	2810	778	2170	1900	1826	2220	1488	2590	1362	1232	1206	1234	1228	1350	59164
d__Archaea	k__unclassified_d__Archaea	p__Candidatus_Altiarchaeota	c__unclassified_p__Candidatus_Altiarchaeota	o__Candidatus_Altiarchaeales	f__unclassified_o__Candidatus_Altiarchaeales	g__unclassified_o__Candidatus_Altiarchaeales	s__Candidatus_Altiarchaeales_archaeon_A3	2	2	2	0	8	2	4	4	8	12	10	30	2	0	0	0	0	0	4	8	10	0	0	8	6	10	10	88	26	26	0	0	2	12	0	6	302
d__Archaea	k__unclassified_d__Archaea	p__Candidatus_Altiarchaeota	c__unclassified_p__Candidatus_Altiarchaeota	o__Candidatus_Altiarchaeales	f__unclassified_o__Candidatus_Altiarchaeales	g__unclassified_o__Candidatus_Altiarchaeales	s__Candidatus_Altiarchaeales_archaeon_HGW-Altiarchaeales-1	6	8	2	30	30	12	18	48	72	40	42	60	14	10	12	10	16	14	36	32	46	10	18	10	10	10	8	58	34	30	10	6	12	16	6	8	804
d__Archaea	k__unclassified_d__Archaea	p__Candidatus_Altiarchaeota	c__unclassified_p__Candidatus_Altiarchaeota	o__Candidatus_Altiarchaeales	f__unclassified_o__Candidatus_Altiarchaeales	g__unclassified_o__Candidatus_Altiarchaeales	s__Candidatus_Altiarchaeales_archaeon_HGW-Altiarchaeales-2	4	6	6	10	20	10	12	10	2	22	8	4	104	52	56	158	272	44	0	0	0	6	0	0	0	0	4	2	6	6	6	10	2	10	12	2	866
d__Archaea	k__unclassified_d__Archaea	p__Candidatus_Altiarchaeota	c__unclassified_p__Candidatus_Altiarchaeota	o__Candidatus_Altiarchaeales	f__unclassified_o__Candidatus_Altiarchaeales	g__unclassified_o__Candidatus_Altiarchaeales	s__Candidatus_Altiarchaeales_archaeon_HGW-Altiarchaeales-3	28	30	12	40	60	62	52	90	64	46	88	40	52	34	36	78	94	30	180	164	208	290	84	80	400	344	304	202	288	374	380	408	410	456	504	320	6332
d__Archaea	k__unclassified_d__Archaea	p__Candidatus_Altiarchaeota	c__unclassified_p__Candidatus_Altiarchaeota	o__Candidatus_Altiarchaeales	f__unclassified_o__Candidatus_Altiarchaeales	g__unclassified_o__Candidatus_Altiarchaeales	s__Candidatus_Altiarchaeales_archaeon_IMC4	38	36	44	38	70	82	64	70	94	52	74	58	66	42	52	24	44	14	52	28	60	52	12	38	38	20	28	56	38	106	20	18	14	32	14	26	1614
d__Archaea	k__unclassified_d__Archaea	p__Candidatus_Altiarchaeota	c__unclassified_p__Candidatus_Altiarchaeota	o__Candidatus_Altiarchaeales	f__unclassified_o__Candidatus_Altiarchaeales	g__unclassified_o__Candidatus_Altiarchaeales	s__Candidatus_Altiarchaeales_archaeon_WOR_SM1_79	758	650	788	590	556	720	798	824	846	860	980	710	600	514	384	348	468	366	1022	798	1028	538	604	402	1210	964	924	988	804	1244	380	446	418	486	478	516	25010
d__Archaea	k__unclassified_d__Archaea	p__Candidatus_Altiarchaeota	c__unclassified_p__Candidatus_Altiarchaeota	o__Candidatus_Altiarchaeales	f__unclassified_o__Candidatus_Altiarchaeales	g__unclassified_o__Candidatus_Altiarchaeales	s__Candidatus_Altiarchaeales_archaeon_WOR_SM1_86-2	246	280	192	184	162	248	248	302	288	174	262	254	248	404	246	216	262	230	504	478	524	312	294	208	744	618	566	1102	770	1454	360	332	286	354	390	344	14086
d__Archaea	k__unclassified_d__Archaea	p__Candidatus_Altiarchaeota	c__unclassified_p__Candidatus_Altiarchaeota	o__Candidatus_Altiarchaeales	f__unclassified_o__Candidatus_Altiarchaeales	g__unclassified_o__Candidatus_Altiarchaeales	s__Candidatus_Altiarchaeales_archaeon_WOR_SM1_SCG	170	180	162	254	184	280	280	288	288	284	272	226	210	202	138	180	154	158	362	244	318	166	126	86	236	200	216	198	182	242	154	196	160	132	128	144	7400
d__Archaea	k__unclassified_d__Archaea	p__Candidatus_Altiarchaeota	c__unclassified_p__Candidatus_Altiarchaeota	o__Candidatus_Altiarchaeales	f__unclassified_o__Candidatus_Altiarchaeales	g__unclassified_o__Candidatus_Altiarchaeales	s__Candidatus_Altiarchaeales_archaeon_ex4484_2	74	54	58	84	80	118	138	148	132	142	160	156	108	196	92	82	142	88	38	52	86	30	26	26	106	58	88	54	64	74	76	88	74	104	92	90	3278
d__Archaea	k__unclassified_d__Archaea	p__Candidatus_Altiarchaeota	c__unclassified_p__Candidatus_Altiarchaeota	o__Candidatus_Altiarchaeales	f__unclassified_o__Candidatus_Altiarchaeales	g__unclassified_o__Candidatus_Altiarchaeales	s__Candidatus_Altiarchaeales_archaeon_ex4484_43	12	4	14	6	4	4	10	14	6	20	22	8	8	10	10	38	470	26	10	0	0	6	4	4	4	22	16	42	10	24	24	18	18	28	12	28	956
d__Archaea	k__unclassified_d__Archaea	p__Candidatus_Altiarchaeota	c__unclassified_p__Candidatus_Altiarchaeota	o__Candidatus_Altiarchaeales	f__unclassified_o__Candidatus_Altiarchaeales	g__unclassified_o__Candidatus_Altiarchaeales	s__Candidatus_Altiarchaeales_archaeon_ex4484_96	52	40	58	140	144	162	172	224	220	96	164	166	76	58	16	50	36	50	42	32	34	28	22	8	34	32	30	44	34	54	52	30	14	30	52	42	2538
d__Archaea	k__unclassified_d__Archaea	p__Candidatus_Altiarchaeota	c__unclassified_p__Candidatus_Altiarchaeota	o__unclassified_p__Candidatus_Altiarchaeota	f__unclassified_p__Candidatus_Altiarchaeota	g__unclassified_p__Candidatus_Altiarchaeota	s__Candidatus_Altiarchaeota_archaeon	558	542	512	722	616	928	1008	996	1082	946	1014	834	770	786	598	1216	4160	848	504	408	486	196	326	176	798	904	664	1756		1710	312	366	428	332	396	362	29104
d__Archaea	k__unclassified_d__Archaea	p__Candidatus_Bathyarchaeota	c__Candidatus_Bathyarchaeia	o__Candidatus_Bathyarchaeales	f__Candidatus_Bathyarchaeaceae	g__Candidatus_Bathyarchaeum	s__Candidatus_Bathyarchaeum_sp.	3334	1262	3526	438	574	768	1018	662	1308	592	776	632	558	662	482	376	314	562	1046	828	948	390	422	242	5606	5322	5210	8616	3568	7094	356	478	432	376	308	398	59484
d__Archaea	k__unclassified_d__Archaea	p__Candidatus_Bathyarchaeota	c__Candidatus_Bathyarchaeia	o__Candidatus_Bathyarchaeales	f__Candidatus_Bathyarchaeaceae	g__Candidatus_Bathyarchaeum	s__Candidatus_Bathyarchaeum_tardum	178	44	182	34	122	54	48	32	50	4	8	10	46	24	30	8	20	46	68	54	56	12	22	18	952	596	564	1106	826	1736	24	30	36	30	58	34	7162
d__Archaea	k__unclassified_d__Archaea	p__Candidatus_Bathyarchaeota	c__Candidatus_Bathyarchaeia	o__Candidatus_Hecatellales	f__unclassified_o__Candidatus_Hecatellales	g__unclassified_o__Candidatus_Hecatellales	s__Candidatus_Hecatellales_archaeon	162	138	196	182	196	238	280	266	358	492	386	334	62	106	90	46	20	110	222	168	278	62	84	46	224	212	222	318	142	348	174	136	126	134	168	152	6878
d__Archaea	k__unclassified_d__Archaea	p__Candidatus_Bathyarchaeota	c__Candidatus_Bathyarchaeia	o__Candidatus_Hecatellales	f__unclassified_o__Candidatus_Hecatellales	g__unclassified_o__Candidatus_Hecatellales	s__Candidatus_Hecatellales_archaeon_B24	22	28	26	26	24	32	26	32	36	90	116	80	18	22	2	8	0	32	20	24	12	12	2	4	16	20	8	14	16	24	6	12	12	18	12	8	860
d__Archaea	k__unclassified_d__Archaea	p__Candidatus_Bathyarchaeota	c__Candidatus_Bathyarchaeia	o__Candidatus_Hecatellales	f__unclassified_o__Candidatus_Hecatellales	g__unclassified_o__Candidatus_Hecatellales	s__Candidatus_Hecatellales_archaeon_ex4484_218	30	30	24	16	22	32	44	44	62	72	40	46	10	32	38	2	0	42	26	10	10	2	2	2	34	40	34	46	38	96	50	18	16	36	22	32	1100
d__Archaea	k__unclassified_d__Archaea	p__Candidatus_Bathyarchaeota	c__Candidatus_Bathyarchaeia	o__unclassified_c__Candidatus_Bathyarchaeia	f__unclassified_c__Candidatus_Bathyarchaeia	g__unclassified_c__Candidatus_Bathyarchaeia	s__Candidatus_Bathyarchaeia_archaeon	32	66	92	74	74	72	88	92	58	74	128	62	38	66	36	52	16	92	104	70	82	24	74	18	56	38	48	92	54	152	42	26	26	44	16	18	2196
d__Archaea	k__unclassified_d__Archaea	p__Candidatus_Bathyarchaeota	c__Candidatus_Bathyarchaeia	o__unclassified_c__Candidatus_Bathyarchaeia	f__unclassified_c__Candidatus_Bathyarchaeia	g__unclassified_c__Candidatus_Bathyarchaeia	s__miscellaneous_Crenarchaeota_group-6_archaeon_AD8-1	292	228	270	140	192	152	150	142	230	98	154	134	190	174	114	80	66	76	464	278	438	80	166	82	342	304	416	298	216	348	160	120	116	178	132	156	7176
d__Archaea	k__unclassified_d__Archaea	p__Candidatus_Bathyarchaeota	c__unclassified_p__Candidatus_Bathyarchaeota	o__unclassified_p__Candidatus_Bathyarchaeota	f__unclassified_p__Candidatus_Bathyarchaeota	g__unclassified_p__Candidatus_Bathyarchaeota	s__Candidatus_Bathyarchaeota_archaeon	86614	55746	81952	53460	57502	67154	71702	69386	79724	65566	78174	65450	58582	57488	40182	40472	35680	48090	89252	58532	78462	38386	29824	19778	100706	89608	88560	118468	72810	133636	42068	42578	39494	44508	44644	45412	2289650
d__Archaea	k__unclassified_d__Archaea	p__Candidatus_Bathyarchaeota	c__unclassified_p__Candidatus_Bathyarchaeota	o__unclassified_p__Candidatus_Bathyarchaeota	f__unclassified_p__Candidatus_Bathyarchaeota	g__unclassified_p__Candidatus_Bathyarchaeota	s__Candidatus_Bathyarchaeota_archaeon_A05DMB-2	382	280	408	298	374	292	316	310	292	330	372	290	216	234	174	272	316	280	258	232	308	78	92	176	264	260	240	360	220	320	208	238	196	218	210	160	9474
d__Archaea	k__unclassified_d__Archaea	p__Candidatus_Bathyarchaeota	c__unclassified_p__Candidatus_Bathyarchaeota	o__unclassified_p__Candidatus_Bathyarchaeota	f__unclassified_p__Candidatus_Bathyarchaeota	g__unclassified_p__Candidatus_Bathyarchaeota	s__Candidatus_Bathyarchaeota_archaeon_A05DMB-3	76	36	48	14	4	2	0	0	0	8	12	2	12	6	10	16	10	16	28	10	18	4	18	0	10	6	4	4	6	22	18	24	16	28	18	14	520
d__Archaea	k__unclassified_d__Archaea	p__Candidatus_Bathyarchaeota	c__unclassified_p__Candidatus_Bathyarchaeota	o__unclassified_p__Candidatus_Bathyarchaeota	f__unclassified_p__Candidatus_Bathyarchaeota	g__unclassified_p__Candidatus_Bathyarchaeota	s__Candidatus_Bathyarchaeota_archaeon_A05DMB-4	56	18	42	70	74	98	122	68	136	126	132	136	108	74	70	86	96	82	34	34	44	22	20	20	118	104	110	94	60	152	56	52	72	100	62	86	2834
d__Archaea	k__unclassified_d__Archaea	p__Candidatus_Bathyarchaeota	c__unclassified_p__Candidatus_Bathyarchaeota	o__unclassified_p__Candidatus_Bathyarchaeota	f__unclassified_p__Candidatus_Bathyarchaeota	g__unclassified_p__Candidatus_Bathyarchaeota	s__Candidatus_Bathyarchaeota_archaeon_A05DMB-5	22	24	22	52	26	52	26	38	50	46	58	56	34	60	32	32	0	30	50	40	30	26	4	2	36	28	22	20	28	50	52	46	46	20	28	24	1212
d__Archaea	k__unclassified_d__Archaea	p__Candidatus_Bathyarchaeota	c__unclassified_p__Candidatus_Bathyarchaeota	o__unclassified_p__Candidatus_Bathyarchaeota	f__unclassified_p__Candidatus_Bathyarchaeota	g__unclassified_p__Candidatus_Bathyarchaeota	s__Candidatus_Bathyarchaeota_archaeon_B23	18	12	16	12	0	18	16	6	12	20	12	34	14	16	16	32	30	16	54	8	6	16	0	0	24	30	26	26	26	30	10	2	8	8	10	2	586
d__Archaea	k__unclassified_d__Archaea	p__Candidatus_Bathyarchaeota	c__unclassified_p__Candidatus_Bathyarchaeota	o__unclassified_p__Candidatus_Bathyarchaeota	f__unclassified_p__Candidatus_Bathyarchaeota	g__unclassified_p__Candidatus_Bathyarchaeota	s__Candidatus_Bathyarchaeota_archaeon_B24	20	32	28	36	30	34	68	56	90	60	74	40	34	78	36	68	88	46	50	54	56	32	22	16	132	98	100	130	82	166	42	26	36	32	38	36	2066
d__Archaea	k__unclassified_d__Archaea	p__Candidatus_Bathyarchaeota	c__unclassified_p__Candidatus_Bathyarchaeota	o__unclassified_p__Candidatus_Bathyarchaeota	f__unclassified_p__Candidatus_Bathyarchaeota	g__unclassified_p__Candidatus_Bathyarchaeota	s__Candidatus_Bathyarchaeota_archaeon_B24-2	56	54	58	14	14	20	32	20	42	28	28	22	60	42	48	62	30	14	102	92	126	82	16	28	118	134	134	148	110	202	52	60	26	66	52	72	2264
d__Archaea	k__unclassified_d__Archaea	p__Candidatus_Bathyarchaeota	c__unclassified_p__Candidatus_Bathyarchaeota	o__unclassified_p__Candidatus_Bathyarchaeota	f__unclassified_p__Candidatus_Bathyarchaeota	g__unclassified_p__Candidatus_Bathyarchaeota	s__Candidatus_Bathyarchaeota_archaeon_B26-1	24	30	12	18	28	34	36	36	22	26	26	18	20	32	12	28	32	10	28	30	46	76	14	18	32	8	8	42	10	46	4	22	6	6	8	6	854
d__Archaea	k__unclassified_d__Archaea	p__Candidatus_Bathyarchaeota	c__unclassified_p__Candidatus_Bathyarchaeota	o__unclassified_p__Candidatus_Bathyarchaeota	f__unclassified_p__Candidatus_Bathyarchaeota	g__unclassified_p__Candidatus_Bathyarchaeota	s__Candidatus_Bathyarchaeota_archaeon_B26-2	236	202	170	72	70	104	134	130	162	130	148	152	226	214	134	128	114	144	130	152	208	160	44	40	210	160	192	372	152	400	224	198	170	184	260	208	6134
d__Archaea	k__unclassified_d__Archaea	p__Candidatus_Bathyarchaeota	c__unclassified_p__Candidatus_Bathyarchaeota	o__unclassified_p__Candidatus_Bathyarchaeota	f__unclassified_p__Candidatus_Bathyarchaeota	g__unclassified_p__Candidatus_Bathyarchaeota	s__Candidatus_Bathyarchaeota_archaeon_B63	24	10	8	4	0	14	6	12	12	0	2	14	48	34	22	22	26	24	4	4	10	20	2	0	24	14	20	38	14	64	6	8	6	32	28	16	592
d__Archaea	k__unclassified_d__Archaea	p__Candidatus_Bathyarchaeota	c__unclassified_p__Candidatus_Bathyarchaeota	o__unclassified_p__Candidatus_Bathyarchaeota	f__unclassified_p__Candidatus_Bathyarchaeota	g__unclassified_p__Candidatus_Bathyarchaeota	s__Candidatus_Bathyarchaeota_archaeon_BA1	74	98	86	64	42	36	70	58	48	60	82	48	48	90	54	70	52	40	88	106	122	32	56	46	64	46	60	94	38	66	96	68	80	92	98	122	2494
d__Archaea	k__unclassified_d__Archaea	p__Candidatus_Bathyarchaeota	c__unclassified_p__Candidatus_Bathyarchaeota	o__unclassified_p__Candidatus_Bathyarchaeota	f__unclassified_p__Candidatus_Bathyarchaeota	g__unclassified_p__Candidatus_Bathyarchaeota	s__Candidatus_Bathyarchaeota_archaeon_BA2	82	26	26	2	12	20	22	24	28	6	10	10	14	22	12	22	30	16	60	62	58	98	26	12	28	24	20	22	30	26	10	10	4	4	22	16	916
d__Archaea	k__unclassified_d__Archaea	p__Candidatus_Bathyarchaeota	c__unclassified_p__Candidatus_Bathyarchaeota	o__unclassified_p__Candidatus_Bathyarchaeota	f__unclassified_p__Candidatus_Bathyarchaeota	g__unclassified_p__Candidatus_Bathyarchaeota	s__Candidatus_Bathyarchaeota_archaeon_CG07_land_8_20_14_0_80_47_9	16	12	22	10	12	2	2	8	2	0	0	6	2	14	8	4	0	2	0	2	4	0	0	0	0	0	0	72	6	32	0	2	0	8	0	4	252
d__Archaea	k__unclassified_d__Archaea	p__Candidatus_Bathyarchaeota	c__unclassified_p__Candidatus_Bathyarchaeota	o__unclassified_p__Candidatus_Bathyarchaeota	f__unclassified_p__Candidatus_Bathyarchaeota	g__unclassified_p__Candidatus_Bathyarchaeota	s__Candidatus_Bathyarchaeota_archaeon_CG_4_8_14_3_um_filter_42_8	8	2	8	10	8	10	10	2	8	30	20	12	16	6	6	6	0	6	0	0	0	0	0	0	4	0	2	6	6	10	0	4	4	2	2	4	212
d__Archaea	k__unclassified_d__Archaea	p__Candidatus_Bathyarchaeota	c__unclassified_p__Candidatus_Bathyarchaeota	o__unclassified_p__Candidatus_Bathyarchaeota	f__unclassified_p__Candidatus_Bathyarchaeota	g__unclassified_p__Candidatus_Bathyarchaeota	s__Candidatus_Bathyarchaeota_archaeon_RBG_13_38_9	60	30	48	60	58	76	110	126	132	90	118	88	36	16	44	8	8	34	150	68	118	8	14	14	18	4	20	22	14	28	20	18	12	22	24	44	1760
d__Archaea	k__unclassified_d__Archaea	p__Candidatus_Bathyarchaeota	c__unclassified_p__Candidatus_Bathyarchaeota	o__unclassified_p__Candidatus_Bathyarchaeota	f__unclassified_p__Candidatus_Bathyarchaeota	g__unclassified_p__Candidatus_Bathyarchaeota	s__Candidatus_Bathyarchaeota_archaeon_RBG_13_46_16b	20	14	4	14	10	32	16	18	26	16	16	2	2	0	10	2	14	2	6	18	6	2	0	0	46	30	38	170	88	94	16	6	10	8	6	8	770
d__Archaea	k__unclassified_d__Archaea	p__Candidatus_Bathyarchaeota	c__unclassified_p__Candidatus_Bathyarchaeota	o__unclassified_p__Candidatus_Bathyarchaeota	f__unclassified_p__Candidatus_Bathyarchaeota	g__unclassified_p__Candidatus_Bathyarchaeota	s__Candidatus_Bathyarchaeota_archaeon_RBG_13_52_12	82	72	48	176	158	198	196	210	182	132	124	140	50	80	48	14	4	54	16	22	18	48	14	2	62	76	94	62	78	82	54	30	30	66	72	64	2858
d__Archaea	k__unclassified_d__Archaea	p__Candidatus_Bathyarchaeota	c__unclassified_p__Candidatus_Bathyarchaeota	o__unclassified_p__Candidatus_Bathyarchaeota	f__unclassified_p__Candidatus_Bathyarchaeota	g__unclassified_p__Candidatus_Bathyarchaeota	s__Candidatus_Bathyarchaeota_archaeon_RBG_13_60_20	356	336	324	304	346	446	510	494	590	748	828	576	360	312	250	296	248	416	210	184	224	84	88	72	210	164	210	168	176	260	248	200	206	224	182	220	11070
d__Archaea	k__unclassified_d__Archaea	p__Candidatus_Bathyarchaeota	c__unclassified_p__Candidatus_Bathyarchaeota	o__unclassified_p__Candidatus_Bathyarchaeota	f__unclassified_p__Candidatus_Bathyarchaeota	g__unclassified_p__Candidatus_Bathyarchaeota	s__Candidatus_Bathyarchaeota_archaeon_RBG_16_48_13	24	6	6	48	88	24	42	46	72	44	48	42	28	54	14	18	2	20	12	34	30	12	8	18	70	42	36	264	68	284	6	6	16	16	16	14	1578
d__Archaea	k__unclassified_d__Archaea	p__Candidatus_Bathyarchaeota	c__unclassified_p__Candidatus_Bathyarchaeota	o__unclassified_p__Candidatus_Bathyarchaeota	f__unclassified_p__Candidatus_Bathyarchaeota	g__unclassified_p__Candidatus_Bathyarchaeota	s__Candidatus_Bathyarchaeota_archaeon_RBG_16_57_9	148	106	136	54	26	66	60	36	68	44	74	68	146	112	96	140	104	82	60	86	84	120	46	50	82	100	88	62	48	74	32	62	52	60	76	52	2800
d__Archaea	k__unclassified_d__Archaea	p__Candidatus_Bathyarchaeota	c__unclassified_p__Candidatus_Bathyarchaeota	o__unclassified_p__Candidatus_Bathyarchaeota	f__unclassified_p__Candidatus_Bathyarchaeota	g__unclassified_p__Candidatus_Bathyarchaeota	s__Candidatus_Bathyarchaeota_archaeon_ex4484_135	20	34	16	2	10	18	16	18	14	14	18	20	42	74	32	56	20	24	44	24	54	4	8	12	22	12	6	22	14	44	28	54	38	30	28	46	938
d__Archaea	k__unclassified_d__Archaea	p__Candidatus_Bathyarchaeota	c__unclassified_p__Candidatus_Bathyarchaeota	o__unclassified_p__Candidatus_Bathyarchaeota	f__unclassified_p__Candidatus_Bathyarchaeota	g__unclassified_p__Candidatus_Bathyarchaeota	s__Candidatus_Bathyarchaeota_archaeon_ex4484_205	8	4	22	40	38	68	52	76	48	44	74	50	24	22	8	20	20	10	8	6	12	8	62	20	16	4	8	132	64	74	0	0	4	12	10	8	1076
d__Archaea	k__unclassified_d__Archaea	p__Candidatus_Bathyarchaeota	c__unclassified_p__Candidatus_Bathyarchaeota	o__unclassified_p__Candidatus_Bathyarchaeota	f__unclassified_p__Candidatus_Bathyarchaeota	g__unclassified_p__Candidatus_Bathyarchaeota	s__Candidatus_Bathyarchaeota_archaeon_ex4484_231	10	12	24	4	4	8	12	14	6	10	22	14	8	16	12	10	14	16	20	18	28	0	6	0	26	34	32	22	14	54	6	18	14	10	14	18	550
d__Archaea	k__unclassified_d__Archaea	p__Candidatus_Bathyarchaeota	c__unclassified_p__Candidatus_Bathyarchaeota	o__unclassified_p__Candidatus_Bathyarchaeota	f__unclassified_p__Candidatus_Bathyarchaeota	g__unclassified_p__Candidatus_Bathyarchaeota	s__Candidatus_Bathyarchaeota_archaeon_ex4484_40	20	8	16	10	8	4	4	6	10	2	2	10	2	2	14	6	4	6	22	34	32	18	2	6	10	16	18	38	20	20	4	0	6	14	10	16	420
d__Archaea	k__unclassified_d__Archaea	p__Candidatus_Bathyarchaeota	c__unclassified_p__Candidatus_Bathyarchaeota	o__unclassified_p__Candidatus_Bathyarchaeota	f__unclassified_p__Candidatus_Bathyarchaeota	g__unclassified_p__Candidatus_Bathyarchaeota	s__miscellaneous_Crenarchaeota_group-15_archaeon_DG-45	262	162	162	252	226	270	296	336	264	254	366	330	270	194	114	144	108	184	202	134	268	224	98	120	422	370	368	318	244	420	128	146	136	124	134	172	8222
d__Archaea	k__unclassified_d__Archaea	p__Candidatus_Bathyarchaeota	c__unclassified_p__Candidatus_Bathyarchaeota	o__unclassified_p__Candidatus_Bathyarchaeota	f__unclassified_p__Candidatus_Bathyarchaeota	g__unclassified_p__Candidatus_Bathyarchaeota	s__miscellaneous_Crenarchaeota_group-1_archaeon_SG8-32-1	5062	1392	4986	94	86	160	168	204	278	60	248	140	198	288	208	78	130	210	306	322	362	72	152	80	1350	1332	1414	724	386	938	92	206	130	120	90	142	22208
d__Archaea	k__unclassified_d__Archaea	p__Candidatus_Bathyarchaeota	c__unclassified_p__Candidatus_Bathyarchaeota	o__unclassified_p__Candidatus_Bathyarchaeota	f__unclassified_p__Candidatus_Bathyarchaeota	g__unclassified_p__Candidatus_Bathyarchaeota	s__miscellaneous_Crenarchaeota_group-1_archaeon_SG8-32-3	94	42	128	24	230	16	10	14	22	6	34	26	12	10	22	0	0	22	50	28	38	12	32	4	38	58	38	34	16	62	4	4	6	22	2	14	1174
d__Archaea	k__unclassified_d__Archaea	p__Candidatus_Bathyarchaeota	c__unclassified_p__Candidatus_Bathyarchaeota	o__unclassified_p__Candidatus_Bathyarchaeota	f__unclassified_p__Candidatus_Bathyarchaeota	g__unclassified_p__Candidatus_Bathyarchaeota	s__miscellaneous_Crenarchaeota_group_archaeon_SMTZ-80	392	340	324	252	226	328	284	282	310	228	214	262	414	384	274	432	624	278	524	532	606	158	268	158	1372	1210	1126	2322	1394	2178	186	246	180	214	208	212	18942
d__Archaea	k__unclassified_d__Archaea	p__Candidatus_Bathyarchaeota	c__unclassified_p__Candidatus_Bathyarchaeota	o__unclassified_p__Candidatus_Bathyarchaeota	f__unclassified_p__Candidatus_Bathyarchaeota	g__unclassified_p__Candidatus_Bathyarchaeota	s__miscellaneous_Crenarchaeota_group_archaeon_SMTZ1-55	278	200	268	164	184	262	334	270	262	260	288	276	292	294	258	128	120	200	788	400	620	378	242	84	514	538	548	544	436	632	312	326	268	360	348	312	11988
d__Archaea	k__unclassified_d__Archaea	p__Candidatus_Bathyarchaeota	c__unclassified_p__Candidatus_Bathyarchaeota	o__unclassified_p__Candidatus_Bathyarchaeota	f__unclassified_p__Candidatus_Bathyarchaeota	g__unclassified_p__Candidatus_Bathyarchaeota	s__uncultured_marine_crenarchaeote_E37-7F	16	10	12	10	18	4	20	2	6	2	2	10	0	2	0	2	0	0	0	0	0	6	0	0	0	6	8	14	12	2	0	2	0	8	0	2	176
d__Archaea	k__unclassified_d__Archaea	p__Candidatus_Bathyarchaeota	c__unclassified_p__Candidatus_Bathyarchaeota	o__unclassified_p__Candidatus_Bathyarchaeota	f__unclassified_p__Candidatus_Bathyarchaeota	g__unclassified_p__Candidatus_Bathyarchaeota	s__uncultured_marine_crenarchaeote_E6-3G	0	4	0	0	4	0	4	6	4	4	10	0	0	0	0	0	0	0	0	0	2	0	2	2	2	0	0	46	16	24	0	0	0	0	0	0	130
d__Archaea	k__unclassified_d__Archaea	p__Candidatus_Bathyarchaeota	c__unclassified_p__Candidatus_Bathyarchaeota	o__unclassified_p__Candidatus_Bathyarchaeota	f__unclassified_p__Candidatus_Bathyarchaeota	g__unclassified_p__Candidatus_Bathyarchaeota	s__uncultured_miscellaneous_Crenarchaeota_group	24	16	26	120	126	114	128	112	88	134	156	182	104	114	68	20	2	68	18	16	22	32	54	24	14	4	12	8	18	16	14	2	10	6	14	16	1902
d__Archaea	k__unclassified_d__Archaea	p__Candidatus_Borrarchaeota	c__Candidatus_Borrarchaeia	o__Candidatus_Borrarchaeales	f__Candidatus_Borrarchaeaceae	g__Candidatus_Borrarchaeum	s__Candidatus_Borrarchaeum_sp.	294	294	318	396	458	470	612	610	700	516	558	478	460	540	330	412	316	370	584	586	730	588	372	298	792	754	744	636	578	974	376	390	414	434	458	480	18320
d__Archaea	k__unclassified_d__Archaea	p__Candidatus_Brockarchaeota	c__unclassified_p__Candidatus_Brockarchaeota	o__unclassified_p__Candidatus_Brockarchaeota	f__unclassified_p__Candidatus_Brockarchaeota	g__unclassified_p__Candidatus_Brockarchaeota	s__Candidatus_Brockarchaeota_archaeon	716	574	636	680	514	826	814	854	894	844	890	824	766	554	382	450	368	602	428	386	502	316	246	170	896	780	826	1064	648	1256	478	494	424	482	476	518	22578
d__Archaea	k__unclassified_d__Archaea	p__Candidatus_Culexarchaeota	c__Candidatus_Culexarchaeia	o__Candidatus_Culexarchaeles	f__Candidatus_Culexarchaeaceae	g__Candidatus_Culexarchaeum	s__Candidatus_Culexarchaeum_nevadense	0	0	0	2	0	0	0	0	0	0	2	0	4	16	10	0	4	0	4	6	6	8	4	2	2	2	2	2	4	8	18	6	8	10	14	2	146
d__Archaea	k__unclassified_d__Archaea	p__Candidatus_Culexarchaeota	c__Candidatus_Culexarchaeia	o__Candidatus_Culexarchaeles	f__Candidatus_Culexarchaeaceae	g__Candidatus_Culexarchaeum	s__Candidatus_Culexarchaeum_yellowstonense	102	100	114	56	56	38	78	82	88	66	90	72	126	104	48	160	144	100	100	68	130	86	30	32	88	78	82	220	136	276	58	74	56	74	80	46	3338
d__Archaea	k__unclassified_d__Archaea	p__Candidatus_Culexarchaeota	c__Candidatus_Culexarchaeia	o__Candidatus_Culexarchaeles	f__Candidatus_Culexmicrobiaceae	g__Candidatus_Culexmicrobium	s__Candidatus_Culexmicrobium_cathedralense	14	8	20	54	42	48	62	92	70	76	78	78	62	58	22	46	18	48	6	32	8	2	12	22	40	30	22	12	6	28	14	14	14	16	22	36	1232
d__Archaea	k__unclassified_d__Archaea	p__Candidatus_Culexarchaeota	c__Candidatus_Culexarchaeia	o__Candidatus_Culexarchaeles	f__Candidatus_Culexmicrobiaceae	g__Candidatus_Culexmicrobium	s__Candidatus_Culexmicrobium_profundum	32	16	22	26	38	38	46	42	24	58	72	62	34	22	28	34	48	48	14	16	26	16	8	18	28	10	24	44	30	42	8	16	14	24	20	4	1052
d__Archaea	k__unclassified_d__Archaea	p__Candidatus_Culexarchaeota	c__Candidatus_Culexarchaeia	o__Candidatus_Culexarchaeles	f__Candidatus_Culexmicrobiaceae	g__Candidatus_Culexmicrobium	s__Candidatus_Culexmicrobium_thermophilum	14	14	26	34	24	26	8	18	8	32	6	16	30	22	28	20	16	2	38	42	40	18	10	0	76	74	30	60	46	80	14	8	6	20	20	10	936
d__Archaea	k__unclassified_d__Archaea	p__Candidatus_Diapherotrites	c__unclassified_p__Candidatus_Diapherotrites	o__unclassified_p__Candidatus_Diapherotrites	f__unclassified_p__Candidatus_Diapherotrites	g__Candidatus_Iainarchaeum	s__Candidatus_ainarchaeum_sp.	68	94	46	52	60	66	66	48	102	54	62	94	116	106	56	50	68	56	44	66	58	116	40	30	110	66	50	610	174	452	58	44	38	78	92	76	3466
d__Archaea	k__unclassified_d__Archaea	p__Candidatus_Diapherotrites	c__unclassified_p__Candidatus_Diapherotrites	o__unclassified_p__Candidatus_Diapherotrites	f__unclassified_p__Candidatus_Diapherotrites	g__unclassified_p__Candidatus_Diapherotrites	s__Candidatus_Diapherotrites_archaeon	504	514	550	858	686	1012	1050	1044	1200	1002	1246	984	1702	1312	1046	1236	1370	1078	804	694	924	558	468	408	1144	998	990	1464	916	1618	1088	1088	982	1134	1158	1064	35894
d__Archaea	k__unclassified_d__Archaea	p__Candidatus_Diapherotrites	c__unclassified_p__Candidatus_Diapherotrites	o__unclassified_p__Candidatus_Diapherotrites	f__unclassified_p__Candidatus_Diapherotrites	g__unclassified_p__Candidatus_Diapherotrites	s__Candidatus_Diapherotrites_archaeon_ADurb.Bin253	0	8	8	0	0	0	10	0	10	4	4	0	8	114	6	2	66	2	4	8	18	8	18	8	8	0	0	96	10	20	0	0	0	0	0	0	440
d__Archaea	k__unclassified_d__Archaea	p__Candidatus_Diapherotrites	c__unclassified_p__Candidatus_Diapherotrites	o__unclassified_p__Candidatus_Diapherotrites	f__unclassified_p__Candidatus_Diapherotrites	g__unclassified_p__Candidatus_Diapherotrites	s__Candidatus_Diapherotrites_archaeon_CG08_land_8_20_14_0_20_30_16	22	16	12	30	14	14	44	16	36	26	34	26	108	56	112	24	80	20	64	68	88	176	22	22	342	330	284	166	140	218	166	124	166	148	128	172	3514
d__Archaea	k__unclassified_d__Archaea	p__Candidatus_Diapherotrites	c__unclassified_p__Candidatus_Diapherotrites	o__unclassified_p__Candidatus_Diapherotrites	f__unclassified_p__Candidatus_Diapherotrites	g__unclassified_p__Candidatus_Diapherotrites	s__Candidatus_Diapherotrites_archaeon_CG08_land_8_20_14_0_20_34_12	10	6	6	4	10	26	40	18	22	18	18	16	0	0	0	10	2	18	6	8	14	4	8	2	68	28	28	126	38	228	0	0	0	2	4	0	788
d__Archaea	k__unclassified_d__Archaea	p__Candidatus_Diapherotrites	c__unclassified_p__Candidatus_Diapherotrites	o__unclassified_p__Candidatus_Diapherotrites	f__unclassified_p__Candidatus_Diapherotrites	g__unclassified_p__Candidatus_Diapherotrites	s__Candidatus_Diapherotrites_archaeon_CG09_land_8_20_14_0_10_32_12	0	0	0	0	0	2	0	0	0	0	0	0	0	0	0	0	0	0	0	0	0	0	0	0	0	0	0	0	0	0	0	0	0	0	0	0	2
d__Archaea	k__unclassified_d__Archaea	p__Candidatus_Diapherotrites	c__unclassified_p__Candidatus_Diapherotrites	o__unclassified_p__Candidatus_Diapherotrites	f__unclassified_p__Candidatus_Diapherotrites	g__unclassified_p__Candidatus_Diapherotrites	s__Candidatus_Diapherotrites_archaeon_CG10_big_fil_rev_8_21_14_0_10_31_34	8	44	4	4	4	8	16	14	0	34	22	12	0	0	0	0	0	0	0	0	14	2	6	0	0	0	6	18	6	10	6	8	6	4	0	0	256
d__Archaea	k__unclassified_d__Archaea	p__Candidatus_Diapherotrites	c__unclassified_p__Candidatus_Diapherotrites	o__unclassified_p__Candidatus_Diapherotrites	f__unclassified_p__Candidatus_Diapherotrites	g__unclassified_p__Candidatus_Diapherotrites	s__Candidatus_Diapherotrites_archaeon_CG11_big_fil_rev_8_21_14_0_20_37_9	16	2	6	8	8	2	16	20	16	24	32	34	54	30	20	38	18	44	28	26	20	6	10	12	62	96	98	40	28	52	8	4	14	4	8	6	910
d__Archaea	k__unclassified_d__Archaea	p__Candidatus_Diapherotrites	c__unclassified_p__Candidatus_Diapherotrites	o__unclassified_p__Candidatus_Diapherotrites	f__unclassified_p__Candidatus_Diapherotrites	g__unclassified_p__Candidatus_Diapherotrites	s__Candidatus_Diapherotrites_archaeon_CG_4_10_14_0_2_um_filter_31_5	0	0	0	0	0	0	0	0	0	0	0	0	0	0	0	6	10	0	0	0	0	0	0	0	0	0	0	0	0	0	0	0	0	0	0	0	16
d__Archaea	k__unclassified_d__Archaea	p__Candidatus_Freyarchaeota	c__unclassified_p__Candidatus_Freyarchaeota	o__unclassified_p__Candidatus_Freyarchaeota	f__unclassified_p__Candidatus_Freyarchaeota	g__unclassified_p__Candidatus_Freyarchaeota	s__Candidatus_Freyarchaeota_archaeon	550	498	510	472	426	510	730	602	740	674	668	716	308	412	220	214	174	444	506	446	550	168	176	92	696	590	566	1328	582	1600	268	350	326	394	432	392	18330
d__Archaea	k__unclassified_d__Archaea	p__Candidatus_Geothermarchaeota	c__unclassified_p__Candidatus_Geothermarchaeota	o__unclassified_p__Candidatus_Geothermarchaeota	f__unclassified_p__Candidatus_Geothermarchaeota	g__unclassified_p__Candidatus_Geothermarchaeota	s__Candidatus_Geothermarchaeota_archaeon	36	30	44	90	64	62	76	108	76	78	54	70	52	52	38	10	6	64	132	78	82	52	50	60	36	42	48	52	46	46	20	20	18	28	34	22	1876
d__Archaea	k__unclassified_d__Archaea	p__Candidatus_Geothermarchaeota	c__unclassified_p__Candidatus_Geothermarchaeota	o__unclassified_p__Candidatus_Geothermarchaeota	f__unclassified_p__Candidatus_Geothermarchaeota	g__unclassified_p__Candidatus_Geothermarchaeota	s__Candidatus_Geothermarchaeota_archaeon_ex4572_27	68	64	58	52	40	50	54	72	78	112	122	84	32	18	18	22	16	24	16	12	14	8	6	16	42	42	32	34	26	54	22	20	18	12	24	24	1406
d__Archaea	k__unclassified_d__Archaea	p__Candidatus_Gerdarchaeota	c__unclassified_p__Candidatus_Gerdarchaeota	o__unclassified_p__Candidatus_Gerdarchaeota	f__unclassified_p__Candidatus_Gerdarchaeota	g__unclassified_p__Candidatus_Gerdarchaeota	s__Candidatus_Gerdarchaeota_archaeon	150	92	114	44	46	48	46	76	76	38	70	78	52	74	50	50	74	46	156	130	156	48	96	118	166	182	184	514	214	522	30	36	54	34	16	24	3904
d__Archaea	k__unclassified_d__Archaea	p__Candidatus_Hadarchaeota	c__Candidatus_Hadarchaeia	o__Candidatus_Hadarchaeales	f__Candidatus_Hadarchaeaceae	g__Candidatus_Hadarchaeum	s__Candidatus_Hadarchaeum_sp.	54	34	42	12	24	28	44	38	34	40	32	52	18	38	24	8	4	28	30	12	16	8	2	2	26	36	22	178	52	130	2	4	0	10	18	16	1118
d__Archaea	k__unclassified_d__Archaea	p__Candidatus_Hadarchaeota	c__Candidatus_Hadarchaeia	o__Candidatus_Hadarchaeales	f__Candidatus_Hadarchaeaceae	g__Candidatus_Hadarchaeum	s__Candidatus_Hadarchaeum_yellowstonense	78	74	56	86	106	144	172	96	162	126	132	136	144	156	106	82	70	88	48	76	68	42	32	30	122	100	92	56	44	68	146	160	138	144	142	128	3650
d__Archaea	k__unclassified_d__Archaea	p__Candidatus_Hadarchaeota	c__Candidatus_Hadarchaeia	o__unclassified_c__Candidatus_Hadarchaeia	f__unclassified_c__Candidatus_Hadarchaeia	g__unclassified_c__Candidatus_Hadarchaeia	s__Hadesarchaea_archaeon	922	766	834	682	554	790	910	930	1096	924	1040	842	840	962	638	638	584	792	976	908	886	478	512	352	1366	1180	1362	1722	1062	2154	956	894	864	994	1168	874	33452
d__Archaea	k__unclassified_d__Archaea	p__Candidatus_Hadarchaeota	c__Candidatus_Hadarchaeia	o__unclassified_c__Candidatus_Hadarchaeia	f__unclassified_c__Candidatus_Hadarchaeia	g__unclassified_c__Candidatus_Hadarchaeia	s__Hadesarchaea_archaeon_B3_Hades	1414	1240	1218	1122	1176	1502	1638	1594	1832	1452	1766	1410	1380	1392	970	772	350	910	1130	1030	1480	982	684	424	1428	1206	1256	904	952	1246	1030	1062	1120	1028	1152	1252	42504
d__Archaea	k__unclassified_d__Archaea	p__Candidatus_Hadarchaeota	c__Candidatus_Hadarchaeia	o__unclassified_c__Candidatus_Hadarchaeia	f__unclassified_c__Candidatus_Hadarchaeia	g__unclassified_c__Candidatus_Hadarchaeia	s__Hadesarchaea_archaeon_CG08_land_8_20_14_0_20_51_8	10	16	6	20	12	18	12	14	26	10	10	48	2	14	6	6	4	4	2	10	6	0	2	0	18	4	2	28	18	38	12	10	4	12	20	22	446
d__Archaea	k__unclassified_d__Archaea	p__Candidatus_Hadarchaeota	c__Candidatus_Hadarchaeia	o__unclassified_c__Candidatus_Hadarchaeia	f__unclassified_c__Candidatus_Hadarchaeia	g__unclassified_c__Candidatus_Hadarchaeia	s__Hadesarchaea_archaeon_DG-33	112	110	84	164	118	172	142	162	140	152	204	114	114	108	74	30	46	86	234	184	236	60	112	36	134	150	128	140	120	156	130	130	132	126	134	136	4610
d__Archaea	k__unclassified_d__Archaea	p__Candidatus_Hadarchaeota	c__Candidatus_Hadarchaeia	o__unclassified_c__Candidatus_Hadarchaeia	f__unclassified_c__Candidatus_Hadarchaeia	g__unclassified_c__Candidatus_Hadarchaeia	s__Hadesarchaea_archaeon_DG-33-1	24	10	20	4	14	6	10	14	16	16	14	0	42	36	26	14	4	26	50	42	60	8	22	14	18	26	18	36	38	52	38	36	16	16	38	42	866
d__Archaea	k__unclassified_d__Archaea	p__Candidatus_Hadarchaeota	c__Candidatus_Hadarchaeia	o__unclassified_c__Candidatus_Hadarchaeia	f__unclassified_c__Candidatus_Hadarchaeia	g__unclassified_c__Candidatus_Hadarchaeia	s__Hadesarchaea_archaeon_YNP_N21	192	202	188	170	162	196	168	162	274	170	178	164	130	136	90	74	76	102	280	230	226	88	130	94	120	114	110	112	60	192	110	120	104	102	110	100	5236
d__Archaea	k__unclassified_d__Archaea	p__Candidatus_Heimdallarchaeota	c__unclassified_p__Candidatus_Heimdallarchaeota	o__unclassified_p__Candidatus_Heimdallarchaeota	f__unclassified_p__Candidatus_Heimdallarchaeota	g__Candidatus_Heimdallarchaeum	s__Candidatus_Heimdallarchaeum_aukensis	34	22	52	70	14	42	44	40	52	40	54	34	34	18	20	44	16	22	40	34	16	40	18	32	120	52	62	1626	370	362	28	48	34	34	20	54	3642
d__Archaea	k__unclassified_d__Archaea	p__Candidatus_Heimdallarchaeota	c__unclassified_p__Candidatus_Heimdallarchaeota	o__unclassified_p__Candidatus_Heimdallarchaeota	f__unclassified_p__Candidatus_Heimdallarchaeota	g__Candidatus_Heimdallarchaeum	s__Candidatus_Heimdallarchaeum_endolithica	24	6	24	24	20	12	20	36	36	28	30	14	20	18	8	2	10	16	48	34	22	8	12	4	140	88	64	1270	322	440	26	16	16	10	12	12	2892
d__Archaea	k__unclassified_d__Archaea	p__Candidatus_Heimdallarchaeota	c__unclassified_p__Candidatus_Heimdallarchaeota	o__unclassified_p__Candidatus_Heimdallarchaeota	f__unclassified_p__Candidatus_Heimdallarchaeota	g__unclassified_p__Candidatus_Heimdallarchaeota	s__Candidatus_Heimdallarchaeota_archaeon	9598	7270	8630	8952	8718	11988	12026	12230	14078	11562	13436	11792	10204	9720	7210	8230	10098	8464	8912	7496	9632	5552	5740	4018	13816	11154	11512	22908	11996	20850	6716	7040	6572	6808	6884	7466	359278
d__Archaea	k__unclassified_d__Archaea	p__Candidatus_Heimdallarchaeota	c__unclassified_p__Candidatus_Heimdallarchaeota	o__unclassified_p__Candidatus_Heimdallarchaeota	f__unclassified_p__Candidatus_Heimdallarchaeota	g__unclassified_p__Candidatus_Heimdallarchaeota	s__Candidatus_Heimdallarchaeota_archaeon_AB_125	18	20	24	108	80	86	110	112	88	90	64	88	60	30	26	22	28	36	40	24	24	50	34	8	116	78	92	710	158	312	24	28	20	26	22	20	2876
d__Archaea	k__unclassified_d__Archaea	p__Candidatus_Heimdallarchaeota	c__unclassified_p__Candidatus_Heimdallarchaeota	o__unclassified_p__Candidatus_Heimdallarchaeota	f__unclassified_p__Candidatus_Heimdallarchaeota	g__unclassified_p__Candidatus_Heimdallarchaeota	s__Candidatus_Heimdallarchaeota_archaeon_B3_Heim	200	278	168	274	272	374	314	296	458	336	418	322	544	466	256	338	444	304	238	224	294	74	102	104	912	672	706	1706	690	1162	208	194	148	194	202	212	14104
d__Archaea	k__unclassified_d__Archaea	p__Candidatus_Heimdallarchaeota	c__unclassified_p__Candidatus_Heimdallarchaeota	o__unclassified_p__Candidatus_Heimdallarchaeota	f__unclassified_p__Candidatus_Heimdallarchaeota	g__unclassified_p__Candidatus_Heimdallarchaeota	s__Candidatus_Heimdallarchaeota_archaeon_LC_2	230	138	206	322	266	306	312	236	304	250	342	226	298	230	224	148	112	180	192	170	248	198	520	150	190	140	174	190	196	230	138	184	132	138	184	150	7854
d__Archaea	k__unclassified_d__Archaea	p__Candidatus_Heimdallarchaeota	c__unclassified_p__Candidatus_Heimdallarchaeota	o__unclassified_p__Candidatus_Heimdallarchaeota	f__unclassified_p__Candidatus_Heimdallarchaeota	g__unclassified_p__Candidatus_Heimdallarchaeota	s__Candidatus_Heimdallarchaeota_archaeon_LC_3	500	368	348	988	926	1182	1202	1284	1488	1152	1182	1128	660	770	358	376	146	516	342	310	520	174	478	222	220	252	238	210	146	216	272	310	258	228	304	268	19542
d__Archaea	k__unclassified_d__Archaea	p__Candidatus_Helarchaeota	c__unclassified_p__Candidatus_Helarchaeota	o__unclassified_p__Candidatus_Helarchaeota	f__unclassified_p__Candidatus_Helarchaeota	g__unclassified_p__Candidatus_Helarchaeota	s__Candidatus_Helarchaeota_archaeon	1644	1148	1530	1228	1242	1506	1772	1630	1916	1438	1716	1300	1402	1254	988	998	1030	990	2000	1642	1930	1092	1038	768	2194	2164	2168	3430	2186	3776	1164	1186	1120	1170	1256	1144	56160
d__Archaea	k__unclassified_d__Archaea	p__Candidatus_Hodarchaeota	c__Candidatus_Hodarchaeia	o__Candidatus_Hodarchaeales	f__Candidatus_Hodarchaeaceae	g__unclassified_f__Candidatus_Hodarchaeaceae	s__Candidatus_Hodarchaeaceae_archaeon	70	16	58	54	70	90	104	100	70	68	294	60	76	74	66	50	22	50	56	66	56	16	64	58	58	24	32	20	22	30	40	26	22	16	24	28	2050
d__Archaea	k__unclassified_d__Archaea	p__Candidatus_Huberarchaea	c__unclassified_p__Candidatus_Huberarchaea	o__unclassified_p__Candidatus_Huberarchaea	f__unclassified_p__Candidatus_Huberarchaea	g__Candidatus_Huberarchaeum	s__Candidatus_Huberarchaeum_crystalense	4	8	20	0	0	0	0	0	0	0	4	0	0	2	2	0	0	0	18	8	8	2	8	0	6	4	2	4	2	14	4	0	0	2	0	0	122
d__Archaea	k__unclassified_d__Archaea	p__Candidatus_Hydrothermarchaeota	c__unclassified_p__Candidatus_Hydrothermarchaeota	o__unclassified_p__Candidatus_Hydrothermarchaeota	f__unclassified_p__Candidatus_Hydrothermarchaeota	g__unclassified_p__Candidatus_Hydrothermarchaeota	s__Candidatus_Hydrothermarchaeota_archaeon	384	280	380	472	440	676	570	638	682	574	620	560	356	298	198	184	144	324	674	546	516	274	274	122	576	496	468	730	292	592	212	232	238	254	244	316	14836
d__Archaea	k__unclassified_d__Archaea	p__Candidatus_Korarchaeota	c__unclassified_p__Candidatus_Korarchaeota	o__unclassified_p__Candidatus_Korarchaeota	f__unclassified_p__Candidatus_Korarchaeota	g__Candidatus_Korarchaeum	s__Candidatus_Korarchaeum_cryptofilum	62	42	56	14	16	16	12	22	12	26	42	38	32	14	4	54	34	18	8	12	2	2	6	2	40	46	58	154	34	136	8	4	10	22	18	18	1094
d__Archaea	k__unclassified_d__Archaea	p__Candidatus_Korarchaeota	c__unclassified_p__Candidatus_Korarchaeota	o__unclassified_p__Candidatus_Korarchaeota	f__unclassified_p__Candidatus_Korarchaeota	g__Candidatus_Korarchaeum	s__Candidatus_Korarchaeum_sp.	60	76	48	14	14	32	10	12	44	34	20	24	46	56	32	58	32	24	24	20	32	42	12	18	26	16	26	26	24	56	24	34	22	42	66	28	1174
d__Archaea	k__unclassified_d__Archaea	p__Candidatus_Korarchaeota	c__unclassified_p__Candidatus_Korarchaeota	o__unclassified_p__Candidatus_Korarchaeota	f__unclassified_p__Candidatus_Korarchaeota	g__Candidatus_Methanodesulfokores	s__Candidatus_Methanodesulfokores_washburnensis	40	12	30	8	6	6	12	6	6	18	12	4	6	6	6	14	16	12	16	10	26	14	10	2	10	2	4	14	24	16	16	18	16	14	16	20	468
d__Archaea	k__unclassified_d__Archaea	p__Candidatus_Korarchaeota	c__unclassified_p__Candidatus_Korarchaeota	o__unclassified_p__Candidatus_Korarchaeota	f__unclassified_p__Candidatus_Korarchaeota	g__unclassified_p__Candidatus_Korarchaeota	s__Candidatus_Korarchaeota_archaeon	2458	2212	2294	1898	1772	2156	2116	2264	2364	1978	2356	1994	2200	2442	1698	1518	1400	1592	2346	2102	2542	1142	1186	782	2796	2434	2404	3416	2192	3728	2052	2138	1942	2208	2306	2286	76714
d__Archaea	k__unclassified_d__Archaea	p__Candidatus_Korarchaeota	c__unclassified_p__Candidatus_Korarchaeota	o__unclassified_p__Candidatus_Korarchaeota	f__unclassified_p__Candidatus_Korarchaeota	g__unclassified_p__Candidatus_Korarchaeota	s__Candidatus_Korarchaeota_archaeon_NZ13-K	10	22	6	4	0	6	0	8	22	8	6	6	14	38	20	44	32	28	38	50	56	10	14	10	40	26	20	24	24	16	30	34	22	30	30	42	790
d__Archaea	k__unclassified_d__Archaea	p__Candidatus_Lokiarchaeota	c__Candidatus_Lokiarchaeia	o__Candidatus_Prometheoarchaeales	f__Candidatus_Prometheoarchaeaceae	g__Candidatus_Prometheoarchaeum	s__Candidatus_Prometheoarchaeum_syntrophicum	420	236	322	422	362	444	408	538	544	562	566	500	436	378	278	308	300	248	246	268	308	158	164	102	668	588	668	1532	716	900	334	368	366	364	336	422	15780
d__Archaea	k__unclassified_d__Archaea	p__Candidatus_Lokiarchaeota	c__Candidatus_Lokiarchaeia	o__unclassified_c__Candidatus_Lokiarchaeia	f__unclassified_c__Candidatus_Lokiarchaeia	g__unclassified_c__Candidatus_Lokiarchaeia	s__Candidatus_Lokiarchaeia_archaeon	6	8	28	30	56	72	64	108	68	26	54	84	48	64	44	70	66	44	44	52	60	80	36	8	140	62	84	2300	608	580	34	32	36	34	50	32	5212
d__Archaea	k__unclassified_d__Archaea	p__Candidatus_Lokiarchaeota	c__unclassified_p__Candidatus_Lokiarchaeota	o__unclassified_p__Candidatus_Lokiarchaeota	f__unclassified_p__Candidatus_Lokiarchaeota	g__Candidatus_Lokiarchaeum	s__Candidatus_Lokiarchaeum_sp._B-35	148	132	180	156	172	182	186	204	258	214	232	210	182	176	116	142	132	118	160	102	170	138	108	78	454	258	282	2720	1010	1156	120	94	106	92	142	108	10438
d__Archaea	k__unclassified_d__Archaea	p__Candidatus_Lokiarchaeota	c__unclassified_p__Candidatus_Lokiarchaeota	o__unclassified_p__Candidatus_Lokiarchaeota	f__unclassified_p__Candidatus_Lokiarchaeota	g__Candidatus_Lokiarchaeum	s__Candidatus_Lokiarchaeum_sp._GC14_75	90	34	78	190	188	240	282	196	372	212	326	248	218	162	114	138	144	160	156	112	162	58	100	62	164	118	130	104	136	194	110	106	68	78	82	102	5434
d__Archaea	k__unclassified_d__Archaea	p__Candidatus_Lokiarchaeota	c__unclassified_p__Candidatus_Lokiarchaeota	o__unclassified_p__Candidatus_Lokiarchaeota	f__unclassified_p__Candidatus_Lokiarchaeota	g__unclassified_p__Candidatus_Lokiarchaeota	s__Candidatus_Lokiarchaeota_archaeon	7706	5678	6906	6666	6334	8682	9354	8934	10800	8968	10680	8772	8334	7986	5482	6650	8394	6792	6558	5884	7800	4362	4018	2490	11842	10450	10230	25090	11590	19338	6014	5806	5716	6208	6572	6354	299440
d__Archaea	k__unclassified_d__Archaea	p__Candidatus_Lokiarchaeota	c__unclassified_p__Candidatus_Lokiarchaeota	o__unclassified_p__Candidatus_Lokiarchaeota	f__unclassified_p__Candidatus_Lokiarchaeota	g__unclassified_p__Candidatus_Lokiarchaeota	s__Candidatus_Lokiarchaeota_archaeon_CR_4	108	70	68	290	212	346	298	298	480	236	358	318	120	98	52	68	88	98	120	112	98	66	102	62	124	160	126	468	148	374	68	70	66	52	70	68	5960
d__Archaea	k__unclassified_d__Archaea	p__Candidatus_Lokiarchaeota	c__unclassified_p__Candidatus_Lokiarchaeota	o__unclassified_p__Candidatus_Lokiarchaeota	f__unclassified_p__Candidatus_Lokiarchaeota	g__unclassified_p__Candidatus_Lokiarchaeota	s__Candidatus_Lokiarchaeota_archaeon_Loki_b31	86	102	116	232	216	288	324	220	294	286	330	264	226	234	114	126	100	180	170	156	218	152	80	78	408	360	374	294	264	380	132	144	74	120	110	142	7394
d__Archaea	k__unclassified_d__Archaea	p__Candidatus_Lokiarchaeota	c__unclassified_p__Candidatus_Lokiarchaeota	o__unclassified_p__Candidatus_Lokiarchaeota	f__unclassified_p__Candidatus_Lokiarchaeota	g__unclassified_p__Candidatus_Lokiarchaeota	s__Candidatus_Lokiarchaeota_archaeon_Loki_b32	94	100	100	258	250	274	354	248	316	296	324	264	212	232	130	98	86	180	152	120	186	78	122	116	218	182	148	254	192	312	122	118	110	128	98	134	6606
d__Archaea	k__unclassified_d__Archaea	p__Candidatus_Marsarchaeota	c__unclassified_p__Candidatus_Marsarchaeota	o__unclassified_p__Candidatus_Marsarchaeota	f__unclassified_p__Candidatus_Marsarchaeota	g__unclassified_p__Candidatus_Marsarchaeota	s__Candidatus_Marsarchaeota_G1_archaeon_BE_D	6	0	0	0	8	10	8	8	0	16	8	0	4	8	0	0	0	4	0	0	2	0	6	0	0	0	0	8	0	4	4	6	4	4	12	2	132
d__Archaea	k__unclassified_d__Archaea	p__Candidatus_Marsarchaeota	c__unclassified_p__Candidatus_Marsarchaeota	o__unclassified_p__Candidatus_Marsarchaeota	f__unclassified_p__Candidatus_Marsarchaeota	g__unclassified_p__Candidatus_Marsarchaeota	s__Candidatus_Marsarchaeota_G1_archaeon_OSP_B	0	2	0	0	4	0	4	0	0	2	0	0	8	2	0	2	12	0	4	4	0	0	8	0	8	4	2	2	2	2	10	0	0	16	16	8	122
d__Archaea	k__unclassified_d__Archaea	p__Candidatus_Marsarchaeota	c__unclassified_p__Candidatus_Marsarchaeota	o__unclassified_p__Candidatus_Marsarchaeota	f__unclassified_p__Candidatus_Marsarchaeota	g__unclassified_p__Candidatus_Marsarchaeota	s__Candidatus_Marsarchaeota_G1_archaeon_OSP_C	0	0	0	0	0	0	0	0	0	2	0	0	0	6	2	0	0	0	0	0	0	0	10	0	0	0	2	0	0	0	0	10	0	8	4	8	52
d__Archaea	k__unclassified_d__Archaea	p__Candidatus_Marsarchaeota	c__unclassified_p__Candidatus_Marsarchaeota	o__unclassified_p__Candidatus_Marsarchaeota	f__unclassified_p__Candidatus_Marsarchaeota	g__unclassified_p__Candidatus_Marsarchaeota	s__Candidatus_Marsarchaeota_G1_archaeon_OSP_D	16	6	8	14	6	8	28	8	10	10	26	20	40	38	30	14	4	22	2	0	10	0	8	6	8	2	2	0	0	0	6	2	4	2	10	14	384
d__Archaea	k__unclassified_d__Archaea	p__Candidatus_Marsarchaeota	c__unclassified_p__Candidatus_Marsarchaeota	o__unclassified_p__Candidatus_Marsarchaeota	f__unclassified_p__Candidatus_Marsarchaeota	g__unclassified_p__Candidatus_Marsarchaeota	s__Candidatus_Marsarchaeota_G2_archaeon_BE_D	6	8	0	14	18	4	18	28	18	20	30	30	8	2	6	10	32	12	6	4	14	6	8	4	20	18	26	28	28	46	4	10	8	8	10	10	522
d__Archaea	k__unclassified_d__Archaea	p__Candidatus_Marsarchaeota	c__unclassified_p__Candidatus_Marsarchaeota	o__unclassified_p__Candidatus_Marsarchaeota	f__unclassified_p__Candidatus_Marsarchaeota	g__unclassified_p__Candidatus_Marsarchaeota	s__Candidatus_Marsarchaeota_G2_archaeon_ECH_B_1	0	0	0	4	10	0	2	2	6	10	10	0	16	4	6	8	2	0	0	0	0	0	0	2	0	0	0	0	0	0	0	0	0	0	0	0	82
d__Archaea	k__unclassified_d__Archaea	p__Candidatus_Marsarchaeota	c__unclassified_p__Candidatus_Marsarchaeota	o__unclassified_p__Candidatus_Marsarchaeota	f__unclassified_p__Candidatus_Marsarchaeota	g__unclassified_p__Candidatus_Marsarchaeota	s__Candidatus_Marsarchaeota_G2_archaeon_ECH_B_3	0	0	0	0	0	0	0	0	0	0	0	0	0	0	0	0	0	0	0	0	0	0	0	0	0	0	0	0	0	0	0	8	0	0	0	0	8
d__Archaea	k__unclassified_d__Archaea	p__Candidatus_Marsarchaeota	c__unclassified_p__Candidatus_Marsarchaeota	o__unclassified_p__Candidatus_Marsarchaeota	f__unclassified_p__Candidatus_Marsarchaeota	g__unclassified_p__Candidatus_Marsarchaeota	s__Candidatus_Marsarchaeota_G2_archaeon_ECH_B_SAG-C16	0	0	0	12	2	4	6	6	14	20	10	0	4	6	2	0	0	2	0	0	0	0	0	0	8	0	8	12	18	16	0	0	0	0	0	0	150
d__Archaea	k__unclassified_d__Archaea	p__Candidatus_Marsarchaeota	c__unclassified_p__Candidatus_Marsarchaeota	o__unclassified_p__Candidatus_Marsarchaeota	f__unclassified_p__Candidatus_Marsarchaeota	g__unclassified_p__Candidatus_Marsarchaeota	s__Candidatus_Marsarchaeota_G2_archaeon_ECH_B_SAG-F08	0	0	0	2	8	4	2	6	6	2	2	0	2	0	0	0	0	0	0	0	0	0	2	2	4	10	2	4	2	12	0	0	0	0	0	2	74
d__Archaea	k__unclassified_d__Archaea	p__Candidatus_Marsarchaeota	c__unclassified_p__Candidatus_Marsarchaeota	o__unclassified_p__Candidatus_Marsarchaeota	f__unclassified_p__Candidatus_Marsarchaeota	g__unclassified_p__Candidatus_Marsarchaeota	s__Candidatus_Marsarchaeota_G2_archaeon_ECH_B_SAG-G06	0	0	0	0	2	4	0	4	0	4	0	0	2	0	0	0	0	0	0	0	0	0	0	0	0	0	0	0	0	0	0	0	0	0	0	0	16
d__Archaea	k__unclassified_d__Archaea	p__Candidatus_Marsarchaeota	c__unclassified_p__Candidatus_Marsarchaeota	o__unclassified_p__Candidatus_Marsarchaeota	f__unclassified_p__Candidatus_Marsarchaeota	g__unclassified_p__Candidatus_Marsarchaeota	s__Candidatus_Marsarchaeota_G2_archaeon_ECH_B_SAG-G16	0	0	0	2	2	12	10	6	10	4	4	4	4	0	10	2	0	4	0	0	2	20	2	0	4	6	16	8	0	18	2	4	12	4	2	12	186
d__Archaea	k__unclassified_d__Archaea	p__Candidatus_Marsarchaeota	c__unclassified_p__Candidatus_Marsarchaeota	o__unclassified_p__Candidatus_Marsarchaeota	f__unclassified_p__Candidatus_Marsarchaeota	g__unclassified_p__Candidatus_Marsarchaeota	s__Candidatus_Marsarchaeota_G2_archaeon_ECH_B_SAG-M15	0	2	0	4	2	8	6	6	4	2	2	6	4	6	0	4	2	0	0	0	0	0	0	0	0	0	0	0	0	0	0	0	0	0	0	0	58
d__Archaea	k__unclassified_d__Archaea	p__Candidatus_Marsarchaeota	c__unclassified_p__Candidatus_Marsarchaeota	o__unclassified_p__Candidatus_Marsarchaeota	f__unclassified_p__Candidatus_Marsarchaeota	g__unclassified_p__Candidatus_Marsarchaeota	s__Candidatus_Marsarchaeota_G2_archaeon_OSP_D	8	2	4	8	4	8	2	16	6	14	32	26	2	2	4	0	2	2	14	24	6	22	16	8	16	10	12	14	20	20	0	0	2	0	2	6	334
d__Archaea	k__unclassified_d__Archaea	p__Candidatus_Marsarchaeota	c__unclassified_p__Candidatus_Marsarchaeota	o__unclassified_p__Candidatus_Marsarchaeota	f__unclassified_p__Candidatus_Marsarchaeota	g__unclassified_p__Candidatus_Marsarchaeota	s__Candidatus_Marsarchaeota_archaeon	652	732	690	1254	1152	1574	1600	1524	1788	1464	1606	1576	1742	1712	1122	1242	816	1280	786	734	1060	492	464	418	1476	1252	1368	1388	924	1776	1286	1384	1246	1328	1468	1348	43724
d__Archaea	k__unclassified_d__Archaea	p__Candidatus_Micrarchaeota	c__Candidatus_Micrarchaeia	o__Candidatus_Anstonellales	f__Candidatus_Anstonellaceae	g__Candidatus_Anstonella	s__Candidatus_Anstonella_stagnisolia	24	6	22	16	4	12	6	14	10	16	12	24	6	10	4	0	2	4	16	4	8	14	0	12	18	32	10	18	18	18	0	0	2	0	0	4	366
d__Archaea	k__unclassified_d__Archaea	p__Candidatus_Micrarchaeota	c__Candidatus_Micrarchaeia	o__Candidatus_Anstonellales	f__Candidatus_Bilamarchaeaceae	g__Candidatus_Bilamarchaeum	s__Candidatus_Bilamarchaeum_dharawalense	2	4	8	8	12	8	34	36	52	32	52	36	26	24	8	38	86	28	8	2	6	0	0	0	24	8	18	58	46	58	0	2	10	4	6	14	758
d__Archaea	k__unclassified_d__Archaea	p__Candidatus_Micrarchaeota	c__Candidatus_Micrarchaeia	o__Candidatus_Burarchaeales	f__Candidatus_Burarchaeaceae	g__Candidatus_Burarchaeum	s__Candidatus_Burarchaeum_australiense	38	14	28	48	50	56	80	70	90	64	124	88	46	50	28	62	42	62	28	36	26	28	20	12	96	140	142	54	80	100	38	72	28	46	36	56	2078
d__Archaea	k__unclassified_d__Archaea	p__Candidatus_Micrarchaeota	c__Candidatus_Micrarchaeia	o__Candidatus_Gugararchaeales	f__Candidatus_Gugararchaeaceae	g__Candidatus_Gugararchaeum	s__Candidatus_Gugararchaeum_adminiculabundum	162	66	98	18	18	12	12	36	10	38	44	18	8	14	2	6	4	8	12	8	10	14	8	2	10	10	12	14	12	24	2	12	14	4	4	0	746
d__Archaea	k__unclassified_d__Archaea	p__Candidatus_Micrarchaeota	c__Candidatus_Micrarchaeia	o__Candidatus_Micrarchaeales	f__Candidatus_Micrarchaeaceae	g__Candidatus_Micrarchaeum	s__Candidatus_Micrarchaeum_acidiphilum	0	0	0	0	14	0	0	0	0	0	0	0	0	0	0	0	0	0	0	0	0	0	0	0	0	0	0	0	0	0	0	0	0	0	0	0	14
d__Archaea	k__unclassified_d__Archaea	p__Candidatus_Micrarchaeota	c__Candidatus_Micrarchaeia	o__Candidatus_Micrarchaeales	f__Candidatus_Micrarchaeaceae	g__Candidatus_Micrarchaeum	s__Candidatus_Micrarchaeum_sp.	0	0	0	0	0	0	0	0	0	0	0	0	0	0	0	2	0	0	0	0	0	0	0	0	0	0	0	0	0	0	0	0	0	0	0	0	2
d__Archaea	k__unclassified_d__Archaea	p__Candidatus_Micrarchaeota	c__Candidatus_Micrarchaeia	o__Candidatus_Micrarchaeales	f__unclassified_o__Candidatus_Micrarchaeales	g__unclassified_o__Candidatus_Micrarchaeales	s__Candidatus_Micrarchaeales_archaeon	6	2	2	12	2	24	30	12	28	14	24	26	6	2	0	0	0	0	6	4	8	0	2	0	2	2	10	2	12	4	8	2	0	2	2	2	258
d__Archaea	k__unclassified_d__Archaea	p__Candidatus_Micrarchaeota	c__Candidatus_Micrarchaeia	o__Candidatus_Norongarragalinales	f__Candidatus_Norongarragalinaceae	g__Candidatus_Norongarragalina	s__Candidatus_Norongarragalina_meridionalis	6	20	2	4	2	0	2	4	2	4	0	0	2	6	0	0	0	8	20	14	8	2	0	0	12	4	2	20	8	6	4	0	0	0	4	0	166
d__Archaea	k__unclassified_d__Archaea	p__Candidatus_Micrarchaeota	c__unclassified_p__Candidatus_Micrarchaeota	o__Candidatus_Fermentimicrarchaeales	f__Candidatus_Fermentimicrarchaeaceae	g__Candidatus_Fermentimicrarchaeum	s__Candidatus_Fermentimicrarchaeum_limneticum	112	44	50	16	8	24	30	40	20	18	16	16	30	34	24	0	2	8	38	22	52	40	8	24	34	38	48	48	36	38	232	168	220	210	206	176	2130
d__Archaea	k__unclassified_d__Archaea	p__Candidatus_Micrarchaeota	c__unclassified_p__Candidatus_Micrarchaeota	o__unclassified_p__Candidatus_Micrarchaeota	f__unclassified_p__Candidatus_Micrarchaeota	g__Candidatus_Mancarchaeum	s__Candidatus_Mancarchaeum_acidiphilum	0	0	2	2	2	2	0	6	0	0	2	0	2	6	0	0	0	0	0	0	10	0	0	0	12	0	0	0	0	0	0	0	0	0	0	0	46
d__Archaea	k__unclassified_d__Archaea	p__Candidatus_Micrarchaeota	c__unclassified_p__Candidatus_Micrarchaeota	o__unclassified_p__Candidatus_Micrarchaeota	f__unclassified_p__Candidatus_Micrarchaeota	g__unclassified_p__Candidatus_Micrarchaeota	s__Candidatus_Micrarchaeota_archaeon	2542	1996	2146	2476	2192	2520	2748	2724	2876	2824	3076	2586	2658	2910	2020	1964	2124	2030	1772	1586	2032	1108	1438	1348	2624	2034	2282	4334	2464	4492	1882	1786	1776	2054	1974	2014	83412
d__Archaea	k__unclassified_d__Archaea	p__Candidatus_Micrarchaeota	c__unclassified_p__Candidatus_Micrarchaeota	o__unclassified_p__Candidatus_Micrarchaeota	f__unclassified_p__Candidatus_Micrarchaeota	g__unclassified_p__Candidatus_Micrarchaeota	s__Candidatus_Micrarchaeota_archaeon_CG06_land_8_20_14_3_00_50_6	0	0	0	10	0	4	2	12	2	2	0	0	2	0	0	2	0	0	0	0	0	0	0	2	0	0	0	0	0	0	0	0	0	0	0	0	38
d__Archaea	k__unclassified_d__Archaea	p__Candidatus_Micrarchaeota	c__unclassified_p__Candidatus_Micrarchaeota	o__unclassified_p__Candidatus_Micrarchaeota	f__unclassified_p__Candidatus_Micrarchaeota	g__unclassified_p__Candidatus_Micrarchaeota	s__Candidatus_Micrarchaeota_archaeon_CG08_land_8_20_14_0_20_59_11	0	4	2	8	6	8	10	2	4	0	6	10	14	12	6	26	24	18	16	42	32	28	18	10	78	52	74	88	80	100	16	18	12	26	18	18	886
d__Archaea	k__unclassified_d__Archaea	p__Candidatus_Micrarchaeota	c__unclassified_p__Candidatus_Micrarchaeota	o__unclassified_p__Candidatus_Micrarchaeota	f__unclassified_p__Candidatus_Micrarchaeota	g__unclassified_p__Candidatus_Micrarchaeota	s__Candidatus_Micrarchaeota_archaeon_CG09_land_8_20_14_0_10_55_25	0	0	6	52	22	24	36	34	30	36	32	38	26	46	2	16	0	30	0	0	0	0	0	0	0	0	0	0	0	0	0	0	0	0	0	0	430
d__Archaea	k__unclassified_d__Archaea	p__Candidatus_Micrarchaeota	c__unclassified_p__Candidatus_Micrarchaeota	o__unclassified_p__Candidatus_Micrarchaeota	f__unclassified_p__Candidatus_Micrarchaeota	g__unclassified_p__Candidatus_Micrarchaeota	s__Candidatus_Micrarchaeota_archaeon_CG10_big_fil_rev_8_21_14_0_10_45_29	4	4	0	10	12	16	14	16	16	14	14	10	0	10	0	0	0	10	0	0	4	0	4	2	2	0	0	24	4	8	0	4	10	14	8	8	242
d__Archaea	k__unclassified_d__Archaea	p__Candidatus_Micrarchaeota	c__unclassified_p__Candidatus_Micrarchaeota	o__unclassified_p__Candidatus_Micrarchaeota	f__unclassified_p__Candidatus_Micrarchaeota	g__unclassified_p__Candidatus_Micrarchaeota	s__Candidatus_Micrarchaeota_archaeon_CG10_big_fil_rev_8_21_14_0_10_54_18	18	4	6	2	0	0	0	2	4	0	2	0	0	6	2	6	4	0	0	0	0	0	0	0	0	0	0	0	0	0	0	0	0	0	0	0	56
d__Archaea	k__unclassified_d__Archaea	p__Candidatus_Micrarchaeota	c__unclassified_p__Candidatus_Micrarchaeota	o__unclassified_p__Candidatus_Micrarchaeota	f__unclassified_p__Candidatus_Micrarchaeota	g__unclassified_p__Candidatus_Micrarchaeota	s__Candidatus_Micrarchaeota_archaeon_CG10_big_fil_rev_8_21_14_0_10_59_7	4	0	2	18	20	32	12	10	24	24	54	8	6	6	2	0	0	14	8	0	2	0	14	8	0	0	4	0	0	2	2	0	0	8	14	4	302
d__Archaea	k__unclassified_d__Archaea	p__Candidatus_Micrarchaeota	c__unclassified_p__Candidatus_Micrarchaeota	o__unclassified_p__Candidatus_Micrarchaeota	f__unclassified_p__Candidatus_Micrarchaeota	g__unclassified_p__Candidatus_Micrarchaeota	s__Candidatus_Micrarchaeota_archaeon_CG11_big_fil_rev_8_21_14_0_20_47_5	2	0	4	0	0	0	0	0	0	0	0	0	0	0	0	0	0	0	0	0	0	0	0	0	0	0	0	0	0	0	0	0	0	0	0	2	8
d__Archaea	k__unclassified_d__Archaea	p__Candidatus_Micrarchaeota	c__unclassified_p__Candidatus_Micrarchaeota	o__unclassified_p__Candidatus_Micrarchaeota	f__unclassified_p__Candidatus_Micrarchaeota	g__unclassified_p__Candidatus_Micrarchaeota	s__Candidatus_Micrarchaeota_archaeon_CG1_02_47_40	0	0	0	0	0	0	0	0	0	0	0	0	0	0	0	16	0	8	0	0	0	0	0	0	4	0	0	6	2	8	0	0	0	0	0	0	44
d__Archaea	k__unclassified_d__Archaea	p__Candidatus_Micrarchaeota	c__unclassified_p__Candidatus_Micrarchaeota	o__unclassified_p__Candidatus_Micrarchaeota	f__unclassified_p__Candidatus_Micrarchaeota	g__unclassified_p__Candidatus_Micrarchaeota	s__Candidatus_Micrarchaeota_archaeon_CG1_02_49_24	30	18	20	2	0	4	8	16	8	12	6	12	2	2	2	38	46	14	8	28	4	0	12	4	24	8	8	14	30	30	2	6	6	2	4	8	438
d__Archaea	k__unclassified_d__Archaea	p__Candidatus_Micrarchaeota	c__unclassified_p__Candidatus_Micrarchaeota	o__unclassified_p__Candidatus_Micrarchaeota	f__unclassified_p__Candidatus_Micrarchaeota	g__unclassified_p__Candidatus_Micrarchaeota	s__Candidatus_Micrarchaeota_archaeon_CG1_02_51_15	0	0	0	2	0	2	10	8	2	8	2	12	8	4	2	0	6	0	0	0	0	0	0	0	0	0	0	0	0	0	0	0	0	0	0	0	66
d__Archaea	k__unclassified_d__Archaea	p__Candidatus_Micrarchaeota	c__unclassified_p__Candidatus_Micrarchaeota	o__unclassified_p__Candidatus_Micrarchaeota	f__unclassified_p__Candidatus_Micrarchaeota	g__unclassified_p__Candidatus_Micrarchaeota	s__Candidatus_Micrarchaeota_archaeon_CG1_02_55_22	4	4	2	30	24	10	56	22	30	28	30	70	12	14	6	10	0	10	4	4	20	30	18	6	24	12	20	30	32	38	4	2	2	0	0	0	608
d__Archaea	k__unclassified_d__Archaea	p__Candidatus_Micrarchaeota	c__unclassified_p__Candidatus_Micrarchaeota	o__unclassified_p__Candidatus_Micrarchaeota	f__unclassified_p__Candidatus_Micrarchaeota	g__unclassified_p__Candidatus_Micrarchaeota	s__Candidatus_Micrarchaeota_archaeon_CG1_02_55_41	2	0	8	0	0	0	0	0	0	0	0	0	0	0	0	2	26	12	0	0	8	12	0	0	0	0	0	32	32	24	0	0	0	0	0	0	158
d__Archaea	k__unclassified_d__Archaea	p__Candidatus_Micrarchaeota	c__unclassified_p__Candidatus_Micrarchaeota	o__unclassified_p__Candidatus_Micrarchaeota	f__unclassified_p__Candidatus_Micrarchaeota	g__unclassified_p__Candidatus_Micrarchaeota	s__Candidatus_Micrarchaeota_archaeon_CG1_02_60_51	0	0	0	0	0	0	0	0	0	0	0	0	2	0	0	2	12	2	0	0	0	0	0	0	0	0	0	0	0	0	0	4	2	0	0	2	26
d__Archaea	k__unclassified_d__Archaea	p__Candidatus_Micrarchaeota	c__unclassified_p__Candidatus_Micrarchaeota	o__unclassified_p__Candidatus_Micrarchaeota	f__unclassified_p__Candidatus_Micrarchaeota	g__unclassified_p__Candidatus_Micrarchaeota	s__Candidatus_Micrarchaeota_archaeon_CG_4_10_14_0_2_um_filter_49_7	4	8	8	4	2	6	2	4	2	4	12	0	28	18	4	10	4	10	6	10	14	8	4	2	18	10	24	6	10	22	0	4	0	4	4	0	276
d__Archaea	k__unclassified_d__Archaea	p__Candidatus_Micrarchaeota	c__unclassified_p__Candidatus_Micrarchaeota	o__unclassified_p__Candidatus_Micrarchaeota	f__unclassified_p__Candidatus_Micrarchaeota	g__unclassified_p__Candidatus_Micrarchaeota	s__Candidatus_Micrarchaeota_archaeon_CG_4_10_14_0_2_um_filter_55_9	0	2	6	0	0	0	4	0	2	4	0	2	22	26	22	8	10	12	14	16	12	8	10	4	14	32	60	16	10	8	22	12	10	12	10	12	402
d__Archaea	k__unclassified_d__Archaea	p__Candidatus_Micrarchaeota	c__unclassified_p__Candidatus_Micrarchaeota	o__unclassified_p__Candidatus_Micrarchaeota	f__unclassified_p__Candidatus_Micrarchaeota	g__unclassified_p__Candidatus_Micrarchaeota	s__Candidatus_Micrarchaeota_archaeon_CG_4_10_14_0_8_um_filter_60_7	0	0	0	0	14	2	6	2	4	8	10	0	4	0	2	0	0	0	0	0	0	0	0	0	0	0	0	0	0	0	32	32	14	16	28	10	184
d__Archaea	k__unclassified_d__Archaea	p__Candidatus_Micrarchaeota	c__unclassified_p__Candidatus_Micrarchaeota	o__unclassified_p__Candidatus_Micrarchaeota	f__unclassified_p__Candidatus_Micrarchaeota	g__unclassified_p__Candidatus_Micrarchaeota	s__Candidatus_Micrarchaeota_archaeon_RBG_16_36_9	0	0	6	4	0	0	0	2	0	0	2	8	2	6	0	0	0	0	0	0	0	0	0	0	0	0	0	10	2	0	0	0	0	0	0	0	42
d__Archaea	k__unclassified_d__Archaea	p__Candidatus_Micrarchaeota	c__unclassified_p__Candidatus_Micrarchaeota	o__unclassified_p__Candidatus_Micrarchaeota	f__unclassified_p__Candidatus_Micrarchaeota	g__unclassified_p__Candidatus_Micrarchaeota	s__Candidatus_Micrarchaeota_archaeon_RBG_16_49_10	8	2	10	0	2	20	12	6	14	0	12	4	2	2	2	2	10	0	12	6	20	16	8	28	2	6	14	6	0	6	16	14	8	28	8	8	314
d__Archaea	k__unclassified_d__Archaea	p__Candidatus_Nanohaloarchaeota	c__Candidatus_Nanohalobia	o__Candidatus_Nanohalobiales	f__Candidatus_Nanohalobiaceae	g__Candidatus_Nanohalobium	s__Candidatus_Nanohalobium_constans	0	0	0	0	0	0	0	0	0	0	0	0	0	4	0	6	6	2	0	0	0	0	0	0	2	2	2	0	0	0	0	0	0	0	0	0	24
d__Archaea	k__unclassified_d__Archaea	p__Candidatus_Nanohaloarchaeota	c__unclassified_p__Candidatus_Nanohaloarchaeota	o__unclassified_p__Candidatus_Nanohaloarchaeota	f__unclassified_p__Candidatus_Nanohaloarchaeota	g__unclassified_p__Candidatus_Nanohaloarchaeota	s__Candidatus_Nanohaloarchaeota_archaeon	4	10	6	76	56	40	24	48	90	74	66	54	64	42	50	80	120	46	6	4	20	38	14	12	0	16	10	58	22	30	104	86	106	90	90	98	1754
d__Archaea	k__unclassified_d__Archaea	p__Candidatus_Nanohaloarchaeota	c__unclassified_p__Candidatus_Nanohaloarchaeota	o__unclassified_p__Candidatus_Nanohaloarchaeota	f__unclassified_p__Candidatus_Nanohaloarchaeota	g__unclassified_p__Candidatus_Nanohaloarchaeota	s__Candidatus_Nanohaloarchaeota_archaeon_QJJ-5	0	6	2	8	0	4	0	2	0	2	2	2	8	0	0	2	0	0	6	4	0	0	0	6	0	0	0	2	0	0	0	2	0	4	0	2	64
d__Archaea	k__unclassified_d__Archaea	p__Candidatus_Nanohaloarchaeota	c__unclassified_p__Candidatus_Nanohaloarchaeota	o__unclassified_p__Candidatus_Nanohaloarchaeota	f__unclassified_p__Candidatus_Nanohaloarchaeota	g__unclassified_p__Candidatus_Nanohaloarchaeota	s__Candidatus_Nanohaloarchaeota_archaeon_QJJ-7	20	8	6	10	0	12	16	6	20	12	24	10	2	4	2	2	0	24	4	2	2	0	0	0	12	2	8	18	10	8	0	2	2	2	0	0	250
d__Archaea	k__unclassified_d__Archaea	p__Candidatus_Nanohaloarchaeota	c__unclassified_p__Candidatus_Nanohaloarchaeota	o__unclassified_p__Candidatus_Nanohaloarchaeota	f__unclassified_p__Candidatus_Nanohaloarchaeota	g__unclassified_p__Candidatus_Nanohaloarchaeota	s__Candidatus_Nanohaloarchaeota_archaeon_QJJ-9	8	4	20	6	0	2	4	2	4	10	4	2	6	0	4	14	0	6	0	0	0	0	0	0	0	0	0	4	2	2	6	2	10	4	4	10	140
d__Archaea	k__unclassified_d__Archaea	p__Candidatus_Nanohaloarchaeota	c__unclassified_p__Candidatus_Nanohaloarchaeota	o__unclassified_p__Candidatus_Nanohaloarchaeota	f__unclassified_p__Candidatus_Nanohaloarchaeota	g__unclassified_p__Candidatus_Nanohaloarchaeota	s__Candidatus_Nanohaloarchaeota_archaeon_SVXNc	0	0	0	8	4	4	2	2	0	10	4	0	2	2	0	0	0	4	0	0	2	0	8	0	10	10	6	24	12	14	0	0	0	0	0	0	128
d__Archaea	k__unclassified_d__Archaea	p__Candidatus_Nezhaarchaeota	c__unclassified_p__Candidatus_Nezhaarchaeota	o__unclassified_p__Candidatus_Nezhaarchaeota	f__unclassified_p__Candidatus_Nezhaarchaeota	g__unclassified_p__Candidatus_Nezhaarchaeota	s__Candidatus_Nezhaarchaeota_archaeon	90	106	132	252	230	334	306	314	282	200	252	216	122	102	60	66	74	108	28	32	34	4	32	58	118	98	70	136	70	176	22	60	32	64	52	44	4376
d__Archaea	k__unclassified_d__Archaea	p__Candidatus_Nezhaarchaeota	c__unclassified_p__Candidatus_Nezhaarchaeota	o__unclassified_p__Candidatus_Nezhaarchaeota	f__unclassified_p__Candidatus_Nezhaarchaeota	g__unclassified_p__Candidatus_Nezhaarchaeota	s__Candidatus_Nezhaarchaeota_archaeon_WYZ-LMO7	2	0	0	2	0	0	0	6	0	0	0	0	0	2	4	6	2	10	2	2	8	4	0	2	4	0	0	6	10	12	0	2	2	4	4	0	96
d__Archaea	k__unclassified_d__Archaea	p__Candidatus_Nezhaarchaeota	c__unclassified_p__Candidatus_Nezhaarchaeota	o__unclassified_p__Candidatus_Nezhaarchaeota	f__unclassified_p__Candidatus_Nezhaarchaeota	g__unclassified_p__Candidatus_Nezhaarchaeota	s__Candidatus_Nezhaarchaeota_archaeon_WYZ-LMO8	6	2	18	22	18	18	30	16	32	42	18	34	4	2	6	2	0	12	2	0	2	0	0	0	10	22	6	12	12	20	6	2	2	8	2	4	392
d__Archaea	k__unclassified_d__Archaea	p__Candidatus_Odinarchaeota	c__Candidatus_Odinarchaeia	o__Candidatus_Odinarchaeales	f__Candidatus_Odinarchaeaceae	g__Candidatus_Odinarchaeum	s__Candidatus_Odinarchaeum_yellowstonii	22	8	26	12	4	4	4	10	0	0	4	0	2	6	14	2	0	0	18	30	18	2	12	8	8	14	8	76	24	66	2	6	4	0	4	0	418
d__Archaea	k__unclassified_d__Archaea	p__Candidatus_Odinarchaeota	c__unclassified_p__Candidatus_Odinarchaeota	o__unclassified_p__Candidatus_Odinarchaeota	f__unclassified_p__Candidatus_Odinarchaeota	g__unclassified_p__Candidatus_Odinarchaeota	s__Candidatus_Odinarchaeota_archaeon	270	188	234	254	280	328	284	356	380	278	354	328	284	428	304	210	140	270	230	210	194	72	88	66	190	140	166	260	116	296	130	122	142	192	178	156	8118
d__Archaea	k__unclassified_d__Archaea	p__Candidatus_Parvarchaeota	c__unclassified_p__Candidatus_Parvarchaeota	o__unclassified_p__Candidatus_Parvarchaeota	f__unclassified_p__Candidatus_Parvarchaeota	g__Candidatus_Parvarchaeum	s__Candidatus_Parvarchaeum_acidiphilum	0	0	0	6	0	0	2	4	2	0	0	0	0	0	0	0	0	0	0	0	0	0	0	0	0	0	0	0	0	0	0	0	0	0	0	0	14
d__Archaea	k__unclassified_d__Archaea	p__Candidatus_Parvarchaeota	c__unclassified_p__Candidatus_Parvarchaeota	o__unclassified_p__Candidatus_Parvarchaeota	f__unclassified_p__Candidatus_Parvarchaeota	g__unclassified_p__Candidatus_Parvarchaeota	s__Candidatus_Parvarchaeota_archaeon	52	60	50	120	144	170	182	146	186	212	260	178	100	60	48	48	54	84	124	98	172	24	42	20	76	60	64	152	74	100	66	48	52	72	64	66	3528
d__Archaea	k__unclassified_d__Archaea	p__Candidatus_Thermoplasmatota	c__Candidatus_Poseidoniia	o__Candidatus_Poseidoniales	f__Candidatus_Poseidoniaceae	g__Candidatus_Poseidonia	s__Candidatus_Poseidonia_alphae	24	10	18	6	6	4	12	6	50	4	4	6	32	26	38	52	256	22	44	26	28	8	18	6	4	2	10	40	20	28	6	8	10	18	18	4	874
d__Archaea	k__unclassified_d__Archaea	p__Candidatus_Thermoplasmatota	c__Candidatus_Poseidoniia	o__Candidatus_Poseidoniales	f__Candidatus_Poseidoniaceae	g__Candidatus_Poseidonia	s__Candidatus_Poseidonia_sp.	18	6	10	10	4	6	22	4	18	10	8	6	6	4	2	4	34	2	8	10	20	14	6	8	4	8	8	34	8	2	2	2	2	2	2	4	318
d__Archaea	k__unclassified_d__Archaea	p__Candidatus_Thermoplasmatota	c__Candidatus_Poseidoniia	o__Candidatus_Poseidoniales	f__Candidatus_Poseidoniaceae	g__unclassified_f__Candidatus_Poseidoniaceae	s__Candidatus_Poseidoniaceae_archaeon	138	96	114	218	184	198	208	206	132	150	284	148	110	128	158	86	110	94	146	116	208	100	160	100	160	150	168	278	222	240	74	54	74	56	70	58	5196
d__Archaea	k__unclassified_d__Archaea	p__Candidatus_Thermoplasmatota	c__Candidatus_Poseidoniia	o__Candidatus_Poseidoniales	f__Candidatus_Thalassarchaeaceae	g__Candidatus_Thalassoarchaea	s__Candidatus_Thalassarchaeum_sp.	422	250	284	344	354	388	400	328	336	456	378	362	380	282	246	190	104	230	204	134	146	352	198	178	200	168	212	158	222	196	172	154	190	170	182	200	9170
d__Archaea	k__unclassified_d__Archaea	p__Candidatus_Thermoplasmatota	c__Candidatus_Poseidoniia	o__Candidatus_Poseidoniales	f__Candidatus_Thalassarchaeaceae	g__Candidatus_Thalassoarchaea	s__Candidatus_Thalassoarchaea_betae	70	52	60	36	28	24	16	36	24	26	26	18	32	8	20	22	16	12	48	38	72	80	38	26	82	66	62	86	110	116	8	8	8	10	6	6	1396
d__Archaea	k__unclassified_d__Archaea	p__Candidatus_Thermoplasmatota	c__Candidatus_Poseidoniia	o__Candidatus_Poseidoniales	f__Candidatus_Thalassarchaeaceae	g__Candidatus_Thalassoarchaea	s__Candidatus_Thalassoarchaea_sp.	0	0	0	8	14	6	12	10	22	10	8	14	10	2	10	0	4	2	10	6	12	14	2	0	10	12	16	24	26	26	0	4	12	6	2	6	320
d__Archaea	k__unclassified_d__Archaea	p__Candidatus_Thermoplasmatota	c__Candidatus_Poseidoniia	o__Candidatus_Poseidoniales	f__Candidatus_Thalassarchaeaceae	g__unclassified_f__Candidatus_Thalassarchaeaceae	s__Candidatus_Thalassarchaeaceae_archaeon	86	28	28	28	44	58	46	52	42	60	88	78	36	56	38	36	10	28	20	14	26	48	60	18	48	80	114	14	70	70	494	560	454	364	442	366	4104
d__Archaea	k__unclassified_d__Archaea	p__Candidatus_Thermoplasmatota	c__Candidatus_Poseidoniia	o__Candidatus_Poseidoniales	f__unclassified_o__Candidatus_Poseidoniales	g__unclassified_o__Candidatus_Poseidoniales	s__Candidatus_Poseidoniales_archaeon	2794	2072	2278	5532	4936	5542	5944	6266	5338	6218	6292	5260	4734	4072	3170	2504	1892	2766	2662	2436	3350	2808	2612	2522	3920	3686	3888	3448	3862	4822	2734	2718	2710	2794	2872	2742	134196
d__Archaea	k__unclassified_d__Archaea	p__Candidatus_Thermoplasmatota	c__Candidatus_Poseidoniia	o__Candidatus_Poseidoniales	f__unclassified_o__Candidatus_Poseidoniales	g__unclassified_o__Candidatus_Poseidoniales	s__Euryarchaeota_archaeon_UBA443	0	0	0	0	0	0	0	0	0	0	0	0	4	0	6	4	4	0	2	0	2	32	2	2	0	0	0	0	0	0	0	0	0	2	0	0	60
d__Archaea	k__unclassified_d__Archaea	p__Candidatus_Thermoplasmatota	c__Candidatus_Poseidoniia	o__Candidatus_Poseidoniales	f__unclassified_o__Candidatus_Poseidoniales	g__unclassified_o__Candidatus_Poseidoniales	s__Marine_Group_II_euryarchaeote_MED-G33	0	4	0	150	108	102	126	64	34	30	38	54	0	2	0	2	6	6	0	0	0	12	0	0	0	0	0	0	0	0	0	0	0	0	0	0	738
d__Archaea	k__unclassified_d__Archaea	p__Candidatus_Thermoplasmatota	c__Candidatus_Poseidoniia	o__Candidatus_Poseidoniales	f__unclassified_o__Candidatus_Poseidoniales	g__unclassified_o__Candidatus_Poseidoniales	s__Marine_Group_II_euryarchaeote_MED-G34	0	2	0	2	2	4	4	2	0	0	0	2	12	8	4	12	36	8	6	2	2	16	0	4	16	12	4	8	6	2	90	42	60	76	50	78	572
d__Archaea	k__unclassified_d__Archaea	p__Candidatus_Thermoplasmatota	c__Candidatus_Poseidoniia	o__Candidatus_Poseidoniales	f__unclassified_o__Candidatus_Poseidoniales	g__unclassified_o__Candidatus_Poseidoniales	s__Marine_Group_II_euryarchaeote_MED-G35	0	0	0	0	0	0	0	0	0	0	0	0	0	0	0	0	0	0	0	6	6	2	2	0	0	0	0	0	0	0	0	0	0	0	0	2	18
d__Archaea	k__unclassified_d__Archaea	p__Candidatus_Thermoplasmatota	c__Candidatus_Poseidoniia	o__Candidatus_Poseidoniales	f__unclassified_o__Candidatus_Poseidoniales	g__unclassified_o__Candidatus_Poseidoniales	s__Marine_Group_II_euryarchaeote_MED-G36	0	0	0	2	2	6	0	2	0	0	0	2	0	0	4	2	0	10	0	0	0	0	6	4	2	0	4	2	4	4	0	0	0	0	0	0	56
d__Archaea	k__unclassified_d__Archaea	p__Candidatus_Thermoplasmatota	c__Candidatus_Poseidoniia	o__Candidatus_Poseidoniales	f__unclassified_o__Candidatus_Poseidoniales	g__unclassified_o__Candidatus_Poseidoniales	s__Marine_Group_II_euryarchaeote_MED-G37	0	0	0	2	0	0	0	0	0	0	12	8	2	8	4	0	2	0	0	0	0	0	0	0	0	0	0	0	0	0	0	0	0	0	0	0	38
d__Archaea	k__unclassified_d__Archaea	p__Candidatus_Thermoplasmatota	c__Candidatus_Poseidoniia	o__Candidatus_Poseidoniales	f__unclassified_o__Candidatus_Poseidoniales	g__unclassified_o__Candidatus_Poseidoniales	s__uncultured_Candidatus_Poseidoniales_archaeon	0	2	0	0	4	0	0	0	0	0	2	0	0	2	2	2	10	2	0	0	0	0	0	0	0	0	0	0	0	0	0	0	0	0	0	0	26
d__Archaea	k__unclassified_d__Archaea	p__Candidatus_Thermoplasmatota	c__Candidatus_Poseidoniia	o__unclassified_c__Candidatus_Poseidoniia	f__unclassified_c__Candidatus_Poseidoniia	g__unclassified_c__Candidatus_Poseidoniia	s__Candidatus_Poseidoniia_archaeon	388	230	232	448	366	416	408	468	340	462	434	306	368	250	244	280	238	288	200	136	164	316	342	316	200	158	176	252	242	300	188	130	184	130	166	170	9936
d__Archaea	k__unclassified_d__Archaea	p__Candidatus_Thermoplasmatota	c__Thermoplasmata	o__Candidatus_Sysuiplasmatales	f__Candidatus_Sysuiplasmataceae	g__Candidatus_Sysuiplasma	s__Candidatus_Sysuiplasma_superficiale	32	22	10	2	2	8	4	4	2	14	10	16	6	0	2	0	0	2	24	20	42	42	12	10	6	4	10	0	20	16	2	0	2	0	2	0	348
d__Archaea	k__unclassified_d__Archaea	p__Candidatus_Thermoplasmatota	c__Thermoplasmata	o__Candidatus_Thermoprofundales	f__unclassified_o__Candidatus_Thermoprofundales	g__unclassified_o__Candidatus_Thermoprofundales	s__Marine_Group_III_euryarchaeote	126	114	108	248	144	218	188	182	158	216	258	194	130	106	68	70	88	94	126	144	164	222	246	390	270	242	272	280	270	370	76	82	66	82	118	112	6242
d__Archaea	k__unclassified_d__Archaea	p__Candidatus_Thermoplasmatota	c__Thermoplasmata	o__Candidatus_Thermoprofundales	f__unclassified_o__Candidatus_Thermoprofundales	g__unclassified_o__Candidatus_Thermoprofundales	s__Marine_Group_III_euryarchaeote_CG-Bathy1	2	0	0	22	36	24	22	28	46	26	24	20	26	20	36	10	12	16	2	4	0	4	4	18	6	4	10	20	4	16	8	12	18	6	10	8	524
d__Archaea	k__unclassified_d__Archaea	p__Candidatus_Thermoplasmatota	c__Thermoplasmata	o__Candidatus_Thermoprofundales	f__unclassified_o__Candidatus_Thermoprofundales	g__unclassified_o__Candidatus_Thermoprofundales	s__Marine_Group_III_euryarchaeote_CG-Bathy2	22	6	18	2	18	8	8	12	4	8	28	6	18	18	36	28	24	8	12	4	8	22	18	4	20	32	36	36	30	36	8	16	8	14	12	16	604
d__Archaea	k__unclassified_d__Archaea	p__Candidatus_Thermoplasmatota	c__Thermoplasmata	o__Candidatus_Thermoprofundales	f__unclassified_o__Candidatus_Thermoprofundales	g__unclassified_o__Candidatus_Thermoprofundales	s__Marine_Group_III_euryarchaeote_CG-Epi1	6	0	0	4	0	0	6	2	4	0	0	2	2	2	16	8	6	0	4	0	2	4	2	10	8	14	16	10	22	14	0	10	0	2	2	0	178
d__Archaea	k__unclassified_d__Archaea	p__Candidatus_Thermoplasmatota	c__Thermoplasmata	o__Candidatus_Thermoprofundales	f__unclassified_o__Candidatus_Thermoprofundales	g__unclassified_o__Candidatus_Thermoprofundales	s__Marine_Group_III_euryarchaeote_CG-Epi2	0	0	0	0	4	0	0	0	0	0	0	0	0	0	2	8	6	0	4	0	10	4	4	10	4	10	8	2	10	4	0	2	2	0	6	2	102
d__Archaea	k__unclassified_d__Archaea	p__Candidatus_Thermoplasmatota	c__Thermoplasmata	o__Candidatus_Thermoprofundales	f__unclassified_o__Candidatus_Thermoprofundales	g__unclassified_o__Candidatus_Thermoprofundales	s__Marine_Group_III_euryarchaeote_CG-Epi3	0	0	0	2	0	0	0	0	0	0	0	0	0	6	4	2	10	2	0	2	0	4	2	0	6	2	8	0	2	2	16	6	18	12	2	16	124
d__Archaea	k__unclassified_d__Archaea	p__Candidatus_Thermoplasmatota	c__Thermoplasmata	o__Candidatus_Thermoprofundales	f__unclassified_o__Candidatus_Thermoprofundales	g__unclassified_o__Candidatus_Thermoprofundales	s__Marine_Group_III_euryarchaeote_CG-Epi4	2	0	0	4	6	16	6	16	10	10	4	4	2	2	0	0	0	4	0	0	0	0	0	0	0	0	0	0	0	0	10	6	2	6	10	8	128
d__Archaea	k__unclassified_d__Archaea	p__Candidatus_Thermoplasmatota	c__Thermoplasmata	o__Candidatus_Thermoprofundales	f__unclassified_o__Candidatus_Thermoprofundales	g__unclassified_o__Candidatus_Thermoprofundales	s__Marine_Group_III_euryarchaeote_CG-Epi5	0	10	4	0	0	0	0	0	0	0	0	0	0	6	2	4	0	0	2	0	0	2	0	10	0	0	0	0	0	0	0	0	0	0	0	0	40
d__Archaea	k__unclassified_d__Archaea	p__Candidatus_Thermoplasmatota	c__Thermoplasmata	o__Candidatus_Thermoprofundales	f__unclassified_o__Candidatus_Thermoprofundales	g__unclassified_o__Candidatus_Thermoprofundales	s__Marine_Group_III_euryarchaeote_CG-Epi6	0	0	0	0	4	6	0	0	0	0	0	0	0	0	0	0	0	0	2	0	16	0	8	6	0	0	0	2	4	8	0	2	4	0	0	0	62
d__Archaea	k__unclassified_d__Archaea	p__Candidatus_Thermoplasmatota	c__Thermoplasmata	o__Candidatus_Thermoprofundales	f__unclassified_o__Candidatus_Thermoprofundales	g__unclassified_o__Candidatus_Thermoprofundales	s__uncultured_marine_group_III_euryarchaeote_AD1000-40-D7	0	0	0	0	0	0	2	0	0	0	0	0	0	0	0	0	0	0	2	0	12	0	2	0	2	4	0	4	8	6	0	0	0	0	0	0	42
d__Archaea	k__unclassified_d__Archaea	p__Candidatus_Thermoplasmatota	c__Thermoplasmata	o__Candidatus_Thermoprofundales	f__unclassified_o__Candidatus_Thermoprofundales	g__unclassified_o__Candidatus_Thermoprofundales	s__uncultured_marine_group_III_euryarchaeote_KM3-28-E8	14	20	24	176	180	184	166	172	82	116	154	126	48	50	32	8	0	38	50	46	48	56	50	42	58	70	62	52	56	64	20	14	18	12	22	18	2348
d__Archaea	k__unclassified_d__Archaea	p__Candidatus_Thermoplasmatota	c__Thermoplasmata	o__Methanomassiliicoccales	f__Candidatus_Methanomethylophilaceae	g__Candidatus_Methanomethylophilus	s__Candidatus_Methanomethylophilus_alvus	6	8	2	22	20	28	24	16	22	50	26	36	18	16	4	12	12	6	0	0	2	0	0	0	0	0	0	0	0	0	0	0	0	4	0	0	334
d__Archaea	k__unclassified_d__Archaea	p__Candidatus_Thermoplasmatota	c__Thermoplasmata	o__Methanomassiliicoccales	f__Candidatus_Methanomethylophilaceae	g__Candidatus_Methanomethylophilus	s__Candidatus_Methanomethylophilus_sp.	16	14	4	54	80	58	66	72	88	136	118	120	54	20	20	28	20	28	0	4	2	18	22	22	10	10	8	42	28	22	12	10	8	32	24	10	1280
d__Archaea	k__unclassified_d__Archaea	p__Candidatus_Thermoplasmatota	c__Thermoplasmata	o__Methanomassiliicoccales	f__Candidatus_Methanomethylophilaceae	g__Candidatus_Methanomethylophilus	s__Candidatus_Methanomethylophilus_sp._1R26	0	4	0	0	6	6	6	2	0	6	6	2	0	0	2	2	0	0	0	0	0	0	0	0	0	0	0	0	0	0	0	4	4	0	4	0	54
d__Archaea	k__unclassified_d__Archaea	p__Candidatus_Thermoplasmatota	c__Thermoplasmata	o__Methanomassiliicoccales	f__Candidatus_Methanomethylophilaceae	g__unclassified_f__Candidatus_Methanomethylophilaceae	s__Candidatus_Methanomethylophilaceae_archaeon	234	236	186	244	168	302	322	304	320	354	384	282	256	292	218	330	452	192	140	120	186	196	160	116	266	238	268	210	170	274	168	230	170	166	176	172	8502
d__Archaea	k__unclassified_d__Archaea	p__Candidatus_Thermoplasmatota	c__Thermoplasmata	o__Methanomassiliicoccales	f__Methanomassiliicoccaceae	g__Candidatus_Methanogranum	s__Candidatus_Methanogranum_sp._U3.2.1	2	0	0	4	4	8	12	4	2	10	10	20	0	2	4	2	6	0	0	0	0	0	0	0	0	0	0	6	2	6	0	2	2	0	0	0	108
d__Archaea	k__unclassified_d__Archaea	p__Candidatus_Thermoplasmatota	c__Thermoplasmata	o__Methanomassiliicoccales	f__Methanomassiliicoccaceae	g__Candidatus_Methanoplasma	s__Candidatus_Methanoplasma_termitum	0	2	0	0	0	0	0	0	0	0	0	0	0	0	2	0	0	2	18	14	12	2	6	0	2	4	0	0	2	4	2	4	4	2	8	6	96
d__Archaea	k__unclassified_d__Archaea	p__Candidatus_Thermoplasmatota	c__Thermoplasmata	o__Methanomassiliicoccales	f__Methanomassiliicoccaceae	g__Methanomassiliicoccus	s__Candidatus_Methanomassiliicoccus_intestinalis	18	24	18	8	4	4	4	16	14	4	6	10	8	10	0	30	16	18	0	2	0	4	0	0	10	8	12	2	12	14	16	8	2	12	10	16	340
d__Archaea	k__unclassified_d__Archaea	p__Candidatus_Thermoplasmatota	c__Thermoplasmata	o__Methanomassiliicoccales	f__Methanomassiliicoccaceae	g__Methanomassiliicoccus	s__Methanomassiliicoccus_luminyensis	46	58	42	16	10	34	22	26	20	24	26	16	144	84	78	128	140	96	50	34	32	16	26	26	88	92	82	150	116	158	44	48	56	64	50	64	2206
d__Archaea	k__unclassified_d__Archaea	p__Candidatus_Thermoplasmatota	c__Thermoplasmata	o__Methanomassiliicoccales	f__Methanomassiliicoccaceae	g__Methanomassiliicoccus	s__Methanomassiliicoccus_sp.	156	180	68	178	190	250	202	214	312	264	274	224	264	244	198	204	366	170	204	266	310	306	96	110	672	592	538	456	422	534	278	254	274	334	286	288	10178
d__Archaea	k__unclassified_d__Archaea	p__Candidatus_Thermoplasmatota	c__Thermoplasmata	o__Methanomassiliicoccales	f__Methanomassiliicoccaceae	g__unclassified_f__Methanomassiliicoccaceae	s__Methanomassiliicoccaceae_archaeon	46	32	40	64	46	74	98	50	74	70	118	66	40	28	26	38	68	46	14	18	30	30	24	32	102	80	66	154	130	92	36	20	22	30	18	36	1958
d__Archaea	k__unclassified_d__Archaea	p__Candidatus_Thermoplasmatota	c__Thermoplasmata	o__Methanomassiliicoccales	f__Methanomassiliicoccaceae	g__unclassified_f__Methanomassiliicoccaceae	s__Methanomassiliicoccaceae_archaeon_COG_1	0	0	4	0	0	0	0	0	0	4	0	2	0	0	0	0	0	0	0	0	0	0	0	0	0	0	0	0	0	0	0	0	0	0	0	0	10
d__Archaea	k__unclassified_d__Archaea	p__Candidatus_Thermoplasmatota	c__Thermoplasmata	o__Methanomassiliicoccales	f__Methanomassiliicoccaceae	g__unclassified_f__Methanomassiliicoccaceae	s__Methanomassiliicoccaceae_archaeon_DOK	0	0	0	0	0	0	0	0	0	0	0	0	0	0	0	0	0	0	0	0	2	4	2	0	4	0	0	0	2	0	0	2	0	2	2	0	20
d__Archaea	k__unclassified_d__Archaea	p__Candidatus_Thermoplasmatota	c__Thermoplasmata	o__Methanomassiliicoccales	f__unclassified_o__Methanomassiliicoccales	g__Candidatus_Methanarcanum	s__Candidatus_Methanarcanum_hacksteinii	0	0	0	0	0	0	2	0	0	2	0	8	0	0	0	0	0	0	0	0	0	0	0	0	0	0	0	0	0	0	0	0	0	0	0	0	12
d__Archaea	k__unclassified_d__Archaea	p__Candidatus_Thermoplasmatota	c__Thermoplasmata	o__Methanomassiliicoccales	f__unclassified_o__Methanomassiliicoccales	g__unclassified_o__Methanomassiliicoccales	s__Methanomassiliicoccales_archaeon	3862	2628	3120	2386	2038	3022	3256	3242	3604	3224	3960	2994	3482	3222	2774	3828	7036	3114	3306	2794	3550	1920	2076	1592	4408	3908	3944	5008	3536	5862	2934	2820	2914	3062	3104	2928	120458
d__Archaea	k__unclassified_d__Archaea	p__Candidatus_Thermoplasmatota	c__Thermoplasmata	o__Methanomassiliicoccales	f__unclassified_o__Methanomassiliicoccales	g__unclassified_o__Methanomassiliicoccales	s__Methanomassiliicoccales_archaeon_LGM-DZ1	10	4	14	18	10	18	10	6	0	4	2	10	12	6	8	4	0	0	0	0	0	0	0	0	0	0	0	0	0	0	0	0	0	0	0	0	136
d__Archaea	k__unclassified_d__Archaea	p__Candidatus_Thermoplasmatota	c__Thermoplasmata	o__Methanomassiliicoccales	f__unclassified_o__Methanomassiliicoccales	g__unclassified_o__Methanomassiliicoccales	s__Methanomassiliicoccales_archaeon_Mx-03	0	2	0	0	0	0	0	0	0	0	0	0	30	16	8	0	0	0	0	0	0	0	0	0	0	0	0	0	0	0	0	2	0	0	0	0	58
d__Archaea	k__unclassified_d__Archaea	p__Candidatus_Thermoplasmatota	c__Thermoplasmata	o__Methanomassiliicoccales	f__unclassified_o__Methanomassiliicoccales	g__unclassified_o__Methanomassiliicoccales	s__Methanomassiliicoccales_archaeon_Mx-06	2	0	2	0	0	0	0	0	0	0	0	0	0	0	0	2	4	2	2	0	4	4	4	0	20	8	12	20	16	16	0	0	0	2	0	0	120
d__Archaea	k__unclassified_d__Archaea	p__Candidatus_Thermoplasmatota	c__Thermoplasmata	o__Methanomassiliicoccales	f__unclassified_o__Methanomassiliicoccales	g__unclassified_o__Methanomassiliicoccales	s__Methanomassiliicoccales_archaeon_PtaB.Bin134	36	40	24	12	16	24	14	18	20	10	16	16	78	58	64	48	232	30	22	18	38	4	18	2	18	18	24	30	34	46	40	46	20	50	50	48	1282
d__Archaea	k__unclassified_d__Archaea	p__Candidatus_Thermoplasmatota	c__Thermoplasmata	o__Methanomassiliicoccales	f__unclassified_o__Methanomassiliicoccales	g__unclassified_o__Methanomassiliicoccales	s__Methanomassiliicoccales_archaeon_PtaB.Bin215	108	112	114	80	74	92	118	126	154	112	108	142	76	80	48	232	1384	190	318	186	222	78	108	36	44	58	44	54	34	42	60	84	38	42	36	56	4890
d__Archaea	k__unclassified_d__Archaea	p__Candidatus_Thermoplasmatota	c__Thermoplasmata	o__Methanomassiliicoccales	f__unclassified_o__Methanomassiliicoccales	g__unclassified_o__Methanomassiliicoccales	s__Methanomassiliicoccales_archaeon_PtaU1.Bin030	6	4	6	6	0	14	8	6	20	18	18	12	18	26	12	10	4	6	34	26	24	74	12	16	70	72	120	118	108	142	248	218	180	254	242	126	2278
d__Archaea	k__unclassified_d__Archaea	p__Candidatus_Thermoplasmatota	c__Thermoplasmata	o__Methanomassiliicoccales	f__unclassified_o__Methanomassiliicoccales	g__unclassified_o__Methanomassiliicoccales	s__Methanomassiliicoccales_archaeon_PtaU1.Bin124	22	26	26	2	2	18	18	22	8	24	8	26	18	22	16	26	28	30	12	4	14	58	0	0	6	6	24	32	10	34	30	42	18	40	32	46	750
d__Archaea	k__unclassified_d__Archaea	p__Candidatus_Thermoplasmatota	c__Thermoplasmata	o__Methanomassiliicoccales	f__unclassified_o__Methanomassiliicoccales	g__unclassified_o__Methanomassiliicoccales	s__Methanomassiliicoccales_archaeon_RumEn_M1	52	46	14	36	18	46	62	52	70	58	84	54	42	40	16	32	18	16	16	8	10	0	22	2	18	12	8	20	10	30	10	4	16	6	6	16	970
d__Archaea	k__unclassified_d__Archaea	p__Candidatus_Thermoplasmatota	c__Thermoplasmata	o__Methanomassiliicoccales	f__unclassified_o__Methanomassiliicoccales	g__unclassified_o__Methanomassiliicoccales	s__Methanomassiliicoccales_archaeon_RumEn_M2	0	0	0	0	0	0	0	0	0	0	0	0	0	0	0	4	2	0	0	0	0	0	0	0	0	0	0	0	0	0	0	2	0	2	2	0	12
d__Archaea	k__unclassified_d__Archaea	p__Candidatus_Thermoplasmatota	c__Thermoplasmata	o__Thermoplasmatales	f__Cuniculiplasmataceae	g__Cuniculiplasma	s__Cuniculiplasma_sp._C_DKE	0	0	0	0	0	0	0	0	0	0	0	0	4	14	18	2	12	0	0	0	0	0	0	0	0	0	0	0	0	0	2	4	8	2	0	0	66
d__Archaea	k__unclassified_d__Archaea	p__Candidatus_Thermoplasmatota	c__Thermoplasmata	o__Thermoplasmatales	f__Ferroplasmaceae	g__Ferroplasma	s__Ferroplasma_acidiphilum	0	0	0	0	0	0	0	0	0	0	0	0	0	0	0	0	0	0	2	2	0	2	4	4	0	0	0	0	0	0	0	0	0	0	0	0	14
d__Archaea	k__unclassified_d__Archaea	p__Candidatus_Thermoplasmatota	c__Thermoplasmata	o__Thermoplasmatales	f__Ferroplasmaceae	g__Ferroplasma	s__Ferroplasma_sp.	2	0	2	0	8	8	2	4	14	2	0	12	14	12	4	0	4	4	0	0	0	0	0	0	0	2	2	0	0	12	10	4	10	2	6	2	142
d__Archaea	k__unclassified_d__Archaea	p__Candidatus_Thermoplasmatota	c__Thermoplasmata	o__Thermoplasmatales	f__Ferroplasmaceae	g__Ferroplasma	s__Ferroplasma_sp._Type_II	14	6	14	16	8	12	14	16	40	6	14	4	48	66	50	66	102	26	40	24	46	16	18	10	30	30	38	4	8	28	10	10	14	16	22	12	898
d__Archaea	k__unclassified_d__Archaea	p__Candidatus_Thermoplasmatota	c__Thermoplasmata	o__Thermoplasmatales	f__Picrophilaceae	g__Picrophilus	s__Picrophilus_oshimae	0	0	0	0	0	0	0	0	0	0	0	0	2	0	2	8	4	4	0	0	0	0	4	4	0	0	0	0	0	0	0	0	0	0	0	0	28
d__Archaea	k__unclassified_d__Archaea	p__Candidatus_Thermoplasmatota	c__Thermoplasmata	o__Thermoplasmatales	f__Thermoplasmataceae	g__Thermoplasma	s__Thermoplasma_acidophilum	0	0	0	0	0	0	0	0	0	0	0	0	0	0	0	0	0	0	0	0	0	0	0	0	0	0	0	0	0	0	10	4	0	4	4	4	26
d__Archaea	k__unclassified_d__Archaea	p__Candidatus_Thermoplasmatota	c__Thermoplasmata	o__Thermoplasmatales	f__Thermoplasmataceae	g__Thermoplasma	s__Thermoplasma_sp.	2	0	0	6	0	0	0	6	0	0	0	0	6	2	2	0	2	0	0	0	0	0	0	0	0	0	0	0	0	0	2	0	0	0	0	0	28
d__Archaea	k__unclassified_d__Archaea	p__Candidatus_Thermoplasmatota	c__Thermoplasmata	o__Thermoplasmatales	f__Thermoplasmataceae	g__Thermoplasma	s__Thermoplasma_sp._Kam2015	0	0	0	6	0	12	0	2	2	2	2	4	0	4	4	2	0	2	0	0	0	0	0	0	0	0	0	0	0	0	8	2	0	4	0	4	60
d__Archaea	k__unclassified_d__Archaea	p__Candidatus_Thermoplasmatota	c__Thermoplasmata	o__Thermoplasmatales	f__Thermoplasmataceae	g__Thermoplasma	s__Thermoplasma_volcanium	4	0	0	0	0	0	0	0	0	0	0	0	0	6	6	0	6	12	0	0	2	0	0	0	0	0	0	0	2	0	0	4	0	0	0	0	42
d__Archaea	k__unclassified_d__Archaea	p__Candidatus_Thermoplasmatota	c__Thermoplasmata	o__Thermoplasmatales	f__unclassified_o__Thermoplasmatales	g__Thermogymnomonas	s__Thermogymnomonas_acidicola	6	0	0	0	0	0	0	0	0	0	0	0	0	0	0	0	0	0	0	2	0	0	4	0	0	2	0	4	2	2	0	0	0	0	0	0	22
d__Archaea	k__unclassified_d__Archaea	p__Candidatus_Thermoplasmatota	c__Thermoplasmata	o__Thermoplasmatales	f__unclassified_o__Thermoplasmatales	g__unclassified_o__Thermoplasmatales	s__Thermoplasmatales_archaeon	2260	1804	1876	2056	1836	2442	2574	2372	2942	2464	2768	2374	2998	2970	2122	2776	3452	2330	2888	2296	2974	1650	1476	1194	4028	3492	3532	5772	3624	6230	2450	2276	2264	2572	2552	2494	98180
d__Archaea	k__unclassified_d__Archaea	p__Candidatus_Thermoplasmatota	c__Thermoplasmata	o__Thermoplasmatales	f__unclassified_o__Thermoplasmatales	g__unclassified_o__Thermoplasmatales	s__Thermoplasmatales_archaeon_A-plasma	38	26	34	6	2	4	8	4	10	0	2	12	72	76	70	26	14	18	4	0	6	6	4	0	0	4	4	0	8	0	12	8	24	18	20	18	558
d__Archaea	k__unclassified_d__Archaea	p__Candidatus_Thermoplasmatota	c__Thermoplasmata	o__Thermoplasmatales	f__unclassified_o__Thermoplasmatales	g__unclassified_o__Thermoplasmatales	s__Thermoplasmatales_archaeon_BRNA1	0	0	0	0	0	0	0	0	0	0	0	0	0	0	0	0	0	0	0	0	0	0	0	0	0	0	0	0	0	4	0	0	0	0	0	0	4
d__Archaea	k__unclassified_d__Archaea	p__Candidatus_Thermoplasmatota	c__Thermoplasmata	o__Thermoplasmatales	f__unclassified_o__Thermoplasmatales	g__unclassified_o__Thermoplasmatales	s__Thermoplasmatales_archaeon_B_DKE	6	0	0	8	10	6	4	2	10	2	6	8	0	0	0	0	0	2	0	0	0	0	0	0	0	0	0	0	0	0	0	0	0	0	0	0	64
d__Archaea	k__unclassified_d__Archaea	p__Candidatus_Thermoplasmatota	c__Thermoplasmata	o__Thermoplasmatales	f__unclassified_o__Thermoplasmatales	g__unclassified_o__Thermoplasmatales	s__Thermoplasmatales_archaeon_E-plasma	0	0	0	0	0	2	0	0	2	6	2	2	0	0	0	0	0	0	0	0	0	0	6	0	0	0	0	0	0	0	0	0	0	0	0	0	20
d__Archaea	k__unclassified_d__Archaea	p__Candidatus_Thermoplasmatota	c__Thermoplasmata	o__Thermoplasmatales	f__unclassified_o__Thermoplasmatales	g__unclassified_o__Thermoplasmatales	s__Thermoplasmatales_archaeon_Gpl	2	0	2	0	6	2	2	4	0	2	4	0	0	0	0	2	0	0	0	0	0	0	0	0	0	0	0	0	0	0	0	0	0	0	0	0	26
d__Archaea	k__unclassified_d__Archaea	p__Candidatus_Thermoplasmatota	c__Thermoplasmata	o__Thermoplasmatales	f__unclassified_o__Thermoplasmatales	g__unclassified_o__Thermoplasmatales	s__Thermoplasmatales_archaeon_I-plasma	0	0	0	0	0	0	0	0	0	0	0	0	0	0	0	2	2	0	2	8	0	2	0	0	0	0	0	0	0	0	0	0	2	0	2	0	20
d__Archaea	k__unclassified_d__Archaea	p__Candidatus_Thermoplasmatota	c__Thermoplasmata	o__Thermoplasmatales	f__unclassified_o__Thermoplasmatales	g__unclassified_o__Thermoplasmatales	s__Thermoplasmatales_archaeon_SCGC_AB-539-C06	0	0	4	2	0	0	8	0	0	0	0	2	0	0	0	0	0	0	12	8	10	6	4	0	50	36	56	34	34	26	4	0	4	4	6	0	310
d__Archaea	k__unclassified_d__Archaea	p__Candidatus_Thermoplasmatota	c__Thermoplasmata	o__Thermoplasmatales	f__unclassified_o__Thermoplasmatales	g__unclassified_o__Thermoplasmatales	s__Thermoplasmatales_archaeon_SCGC_AB-539-N05	28	32	34	8	20	18	42	36	44	14	22	24	10	14	14	20	22	22	28	30	20	30	20	20	12	4	10	42	10	44	26	26	30	28	12	10	826
d__Archaea	k__unclassified_d__Archaea	p__Candidatus_Thermoplasmatota	c__Thermoplasmata	o__Thermoplasmatales	f__unclassified_o__Thermoplasmatales	g__unclassified_o__Thermoplasmatales	s__Thermoplasmatales_archaeon_SCGC_AB-540-F20	22	18	16	112	80	120	184	114	224	112	138	110	88	110	58	116	82	86	52	56	66	46	28	14	164	172	180	176	118	192	52	48	44	40	26	38	3302
d__Archaea	k__unclassified_d__Archaea	p__Candidatus_Thermoplasmatota	c__Thermoplasmata	o__Thermoplasmatales	f__unclassified_o__Thermoplasmatales	g__unclassified_o__Thermoplasmatales	s__Thermoplasmatales_archaeon_SG8-52-1	28	18	34	38	14	24	22	8	30	8	22	24	56	52	38	64	118	54	94	54	118	46	58	22	100	98	52	84	72	134	36	32	42	12	36	38	1780
d__Archaea	k__unclassified_d__Archaea	p__Candidatus_Thermoplasmatota	c__Thermoplasmata	o__Thermoplasmatales	f__unclassified_o__Thermoplasmatales	g__unclassified_o__Thermoplasmatales	s__Thermoplasmatales_archaeon_SG8-52-2	32	18	24	36	30	66	44	32	70	50	64	68	44	64	30	28	58	44	108	98	144	76	50	8	92	90	86	144	88	158	34	32	40	30	28	20	2128
d__Archaea	k__unclassified_d__Archaea	p__Candidatus_Thermoplasmatota	c__Thermoplasmata	o__Thermoplasmatales	f__unclassified_o__Thermoplasmatales	g__unclassified_o__Thermoplasmatales	s__Thermoplasmatales_archaeon_SG8-52-3	116	48	130	156	160	258	248	236	350	248	294	210	104	142	138	90	178	112	194	84	186	62	34	76	60	84	52	102	110	132	88	100	130	86	96	110	5004
d__Archaea	k__unclassified_d__Archaea	p__Candidatus_Thermoplasmatota	c__Thermoplasmata	o__Thermoplasmatales	f__unclassified_o__Thermoplasmatales	g__unclassified_o__Thermoplasmatales	s__Thermoplasmatales_archaeon_SG8-52-4	558	270	416	236	208	274	270	294	370	216	218	172	462	368	232	252	418	176	248	278	304	246	166	100	1280	1644	1306	1468	1028	1370	570	426	524	582	660	590	18200
d__Archaea	k__unclassified_d__Archaea	p__Candidatus_Thermoplasmatota	c__Thermoplasmata	o__Thermoplasmatales	f__unclassified_o__Thermoplasmatales	g__unclassified_o__Thermoplasmatales	s__Thermoplasmatales_archaeon_SM1-50	136	96	150	142	124	158	180	160	182	130	124	140	62	74	56	102	72	80	92	60	112	30	64	38	64	102	74	164	100	158	84	86	88	74	72	90	3720
d__Archaea	k__unclassified_d__Archaea	p__Candidatus_Thermoplasmatota	c__Thermoplasmata	o__Thermoplasmatales	f__unclassified_o__Thermoplasmatales	g__unclassified_o__Thermoplasmatales	s__Thermoplasmatales_archaeon_SW_10_69_26	118	66	86	110	68	76	96	86	86	88	108	106	56	60	148	42	26	58	56	50	48	60	60	66	110	94	82	160	104	124	112	88	84	68	102	88	3040
d__Archaea	k__unclassified_d__Archaea	p__Candidatus_Thermoplasmatota	c__Thermoplasmata	o__Thermoplasmatales	f__unclassified_o__Thermoplasmatales	g__unclassified_o__Thermoplasmatales	s__Thermoplasmatales_archaeon_ex4484_30	54	34	40	32	46	60	70	32	64	40	68	36	26	24	42	54	20	42	56	20	44	6	22	10	18	20	48	80	46	92	28	14	24	22	22	18	1374
d__Archaea	k__unclassified_d__Archaea	p__Candidatus_Thermoplasmatota	c__Thermoplasmata	o__Thermoplasmatales	f__unclassified_o__Thermoplasmatales	g__unclassified_o__Thermoplasmatales	s__Thermoplasmatales_archaeon_ex4484_36	10	6	12	6	26	16	14	8	2	10	10	14	10	16	14	10	4	8	20	10	2	10	8	18	12	8	10	24	12	14	8	6	4	12	10	20	404
d__Archaea	k__unclassified_d__Archaea	p__Candidatus_Thermoplasmatota	c__Thermoplasmata	o__Thermoplasmatales	f__unclassified_o__Thermoplasmatales	g__unclassified_o__Thermoplasmatales	s__Thermoplasmatales_archaeon_ex4484_6	4	12	20	32	28	14	40	42	22	30	44	42	22	24	12	38	68	28	56	42	52	16	14	24	28	38	38	494	140	216	10	20	6	16	10	12	1754
d__Archaea	k__unclassified_d__Archaea	p__Candidatus_Thermoplasmatota	c__Thermoplasmata	o__Thermoplasmatales	f__unclassified_o__Thermoplasmatales	g__unclassified_o__Thermoplasmatales	s__Thermoplasmatales_archaeon_ex4572_165	0	0	0	0	2	2	6	0	0	0	4	0	2	6	2	0	0	0	24	30	10	6	12	12	0	2	2	6	4	6	0	0	0	0	0	0	138
d__Archaea	k__unclassified_d__Archaea	p__Candidatus_Thermoplasmatota	c__Thermoplasmata	o__unclassified_c__Thermoplasmata	f__unclassified_c__Thermoplasmata	g__unclassified_c__Thermoplasmata	s__Thermoplasmata_archaeon	32758	25828	27892	29666	27218	34996	37608	37720	39926	39260	44180	38136	31188	31378	22178	23218	23678	24196	27724	23712	28664	16038	16978	13182	48258	39228	39442	159414	55704	129464	22752	22660	21176	23364	23804	23370	1305958
d__Archaea	k__unclassified_d__Archaea	p__Candidatus_Thermoplasmatota	c__Thermoplasmata	o__unclassified_c__Thermoplasmata	f__unclassified_c__Thermoplasmata	g__unclassified_c__Thermoplasmata	s__Thermoplasmata_archaeon_HGW-Thermoplasmata-1	24	22	32	8	24	42	8	32	38	44	40	26	24	6	4	20	28	18	6	10	10	14	6	4	36	30	14	36	28	62	8	0	10	14	10	6	744
d__Archaea	k__unclassified_d__Archaea	p__Candidatus_Thermoplasmatota	c__Thermoplasmata	o__unclassified_c__Thermoplasmata	f__unclassified_c__Thermoplasmata	g__unclassified_c__Thermoplasmata	s__Thermoplasmata_archaeon_HGW-Thermoplasmata-2	20	20	30	36	40	52	34	10	36	18	34	44	64	68	46	96	154	70	14	14	12	0	2	2	32	18	26	50	10	58	42	40	24	38	30	26	1310
d__Archaea	k__unclassified_d__Archaea	p__Candidatus_Thermoplasmatota	c__Thermoplasmata	o__unclassified_c__Thermoplasmata	f__unclassified_c__Thermoplasmata	g__unclassified_c__Thermoplasmata	s__Thermoplasmata_archaeon_M11B2D	512	252	574	100	92	116	162	160	180	144	184	202	170	164	138	64	128	106	590	450	412	174	262	132	760	710	800	726	684	928	280	356	354	262	248	378	11954
d__Archaea	k__unclassified_d__Archaea	p__Candidatus_Thermoplasmatota	c__Thermoplasmata	o__unclassified_c__Thermoplasmata	f__unclassified_c__Thermoplasmata	g__unclassified_c__Thermoplasmata	s__Thermoplasmata_archaeon_M8B2D	2892	1786	3210	2500	3314	5766	7344	7030	8988	3816	5178	4476	1378	1120	810	654	270	2580	3130	3030	2886	688	2416	980	3056	3734	3608	5396	2754	6762	412	430	398	478	426	524	104220
d__Archaea	k__unclassified_d__Archaea	p__Candidatus_Thermoplasmatota	c__Thermoplasmata	o__unclassified_c__Thermoplasmata	f__unclassified_c__Thermoplasmata	g__unclassified_c__Thermoplasmata	s__Thermoplasmata_archaeon_M9B1D	92	72	74	68	56	64	82	50	140	76	102	86	78	126	64	110	84	72	200	110	114	64	82	42	62	40	58	78	54	78	108	104	80	78	104	100	3052
d__Archaea	k__unclassified_d__Archaea	p__Candidatus_Thermoplasmatota	c__Thermoplasmata	o__unclassified_c__Thermoplasmata	f__unclassified_c__Thermoplasmata	g__unclassified_c__Thermoplasmata	s__Thermoplasmata_archaeon_M9B2D	1086	640	1224	952	1050	1742	1966	2082	2332	1064	1460	1326	664	668	648	362	394	898	2620	1944	1858	594	1186	604	1852	1646	1734	3230	1802	3908	600	628	586	618	564	722	47254
d__Archaea	k__unclassified_d__Archaea	p__Candidatus_Thermoplasmatota	c__Thermoplasmata	o__unclassified_c__Thermoplasmata	f__unclassified_c__Thermoplasmata	g__unclassified_c__Thermoplasmata	s__methanogenic_archaeon_ISO4-H5	0	0	0	0	2	6	2	0	2	2	0	0	0	0	0	0	0	0	0	0	0	2	0	0	0	0	0	0	0	0	30	12	14	14	8	4	98
d__Archaea	k__unclassified_d__Archaea	p__Candidatus_Thermoplasmatota	c__unclassified_p__Candidatus_Thermoplasmatota	o__unclassified_p__Candidatus_Thermoplasmatota	f__unclassified_p__Candidatus_Thermoplasmatota	g__Aciduliprofundum	s__Aciduliprofundum_sp.	0	12	12	12	6	20	8	30	18	12	28	16	8	2	6	12	14	22	2	2	6	0	4	2	12	4	22	12	8	8	2	16	4	18	14	20	394
d__Archaea	k__unclassified_d__Archaea	p__Candidatus_Thermoplasmatota	c__unclassified_p__Candidatus_Thermoplasmatota	o__unclassified_p__Candidatus_Thermoplasmatota	f__unclassified_p__Candidatus_Thermoplasmatota	g__Aciduliprofundum	s__Aciduliprofundum_sp._MAR08-339	14	16	20	4	6	6	6	0	2	4	0	6	0	26	6	6	2	0	10	10	18	10	4	6	32	38	16	40	26	38	6	4	4	2	22	4	414
d__Archaea	k__unclassified_d__Archaea	p__Candidatus_Thermoplasmatota	c__unclassified_p__Candidatus_Thermoplasmatota	o__unclassified_p__Candidatus_Thermoplasmatota	f__unclassified_p__Candidatus_Thermoplasmatota	g__Aciduliprofundum	s__Candidatus_Aciduliprofundum_boonei	18	20	34	4	6	10	14	10	14	4	12	8	18	14	10	26	44	20	54	40	22	64	26	50	384	364	326	422	284	540	6	4	10	10	8	10	2910
d__Archaea	k__unclassified_d__Archaea	p__Candidatus_Thermoplasmatota	c__unclassified_p__Candidatus_Thermoplasmatota	o__unclassified_p__Candidatus_Thermoplasmatota	f__unclassified_p__Candidatus_Thermoplasmatota	g__unclassified_p__Candidatus_Thermoplasmatota	s__Candidatus_Thermoplasmatota_archaeon	9162	7594	8744	7154	6734	8588	9224	8652	10022	8442	9712	8452	10630	11446	8790	10554	8000	11242	9206	7840	9720	4954	4118	3400	11304	10438	10458	14352	8752	14076	8424	8004	7630	8590	8400	8312	321120
d__Archaea	k__unclassified_d__Archaea	p__Candidatus_Thorarchaeota	c__unclassified_p__Candidatus_Thorarchaeota	o__unclassified_p__Candidatus_Thorarchaeota	f__unclassified_p__Candidatus_Thorarchaeota	g__unclassified_p__Candidatus_Thorarchaeota	s__Candidatus_Thorarchaeota_archaeon	8580	7088	8074	6174	5858	7380	7692	7710	9032	7008	8308	6952	8054	8078	5862	5934	6180	5918	12830	10570	11894	5236	5782	4058	17274	12360	12224	92414	21346	51744	6926	7058	6626	7174	7394	8116	430908
d__Archaea	k__unclassified_d__Archaea	p__Candidatus_Thorarchaeota	c__unclassified_p__Candidatus_Thorarchaeota	o__unclassified_p__Candidatus_Thorarchaeota	f__unclassified_p__Candidatus_Thorarchaeota	g__unclassified_p__Candidatus_Thorarchaeota	s__Candidatus_Thorarchaeota_archaeon_AB_25	144	140	134	206	164	142	218	178	214	200	278	180	138	180	98	110	126	152	172	138	208	52	88	82	210	170	130	1222	212	606	136	126	102	134	138	118	7046
d__Archaea	k__unclassified_d__Archaea	p__Candidatus_Thorarchaeota	c__unclassified_p__Candidatus_Thorarchaeota	o__unclassified_p__Candidatus_Thorarchaeota	f__unclassified_p__Candidatus_Thorarchaeota	g__unclassified_p__Candidatus_Thorarchaeota	s__Candidatus_Thorarchaeota_archaeon_SMTZ-45	148	120	120	106	120	112	168	132	126	160	208	190	158	518	156	136	154	74	152	178	138	118	160	38	266	208	200	608	208	450	62	54	80	70	88	80	6064
d__Archaea	k__unclassified_d__Archaea	p__Candidatus_Thorarchaeota	c__unclassified_p__Candidatus_Thorarchaeota	o__unclassified_p__Candidatus_Thorarchaeota	f__unclassified_p__Candidatus_Thorarchaeota	g__unclassified_p__Candidatus_Thorarchaeota	s__Candidatus_Thorarchaeota_archaeon_SMTZ1-45	174	116	148	258	284	470	502	484	626	436	538	526	260	314	148	294	228	250	280	232	194	254	152	152	526	498	570	1292	550	888	152	152	124	174	138	134	12518
d__Archaea	k__unclassified_d__Archaea	p__Candidatus_Thorarchaeota	c__unclassified_p__Candidatus_Thorarchaeota	o__unclassified_p__Candidatus_Thorarchaeota	f__unclassified_p__Candidatus_Thorarchaeota	g__unclassified_p__Candidatus_Thorarchaeota	s__Candidatus_Thorarchaeota_archaeon_SMTZ1-83	430	316	430	490	446	640	690	668	766	704	728	634	838	750	560	540	448	590	420	358	520	236	210	170	892	716	636	1342	704	1218	486	532	412	598	596	560	21274
d__Archaea	k__unclassified_d__Archaea	p__Candidatus_Verstraetearchaeota	c__Candidatus_Methanomethylicia	o__Candidatus_Methanomethylicales	f__Candidatus_Methanomethylicaceae	g__Candidatus_Methanomethylicus	s__Candidatus_Methanomethylicus_sp.	84	44	54	130	168	202	148	90	208	170	192	190	148	180	74	208	150	172	52	48	54	24	16	24	112	68	82	108	88	130	46	20	26	20	12	46	3588
d__Archaea	k__unclassified_d__Archaea	p__Candidatus_Verstraetearchaeota	c__Candidatus_Methanomethylicia	o__Candidatus_Methanomethylicales	f__Candidatus_Methanomethylicaceae	g__Candidatus_Methanosuratincola	s__Candidatus_Methanosuratincola_sp.	252	170	234	190	196	228	262	210	390	208	294	234	316	410	212	268	278	324	294	304	508	252	166	146	456	416	464	484	308	728	256	192	240	284	282	256	10712
d__Archaea	k__unclassified_d__Archaea	p__Candidatus_Verstraetearchaeota	c__Candidatus_Methanomethylicia	o__Candidatus_Methanomethylicales	f__Candidatus_Methanomethylicaceae	g__Candidatus_Methanosuratincola	s__Candidatus_Methanosuratincola_subterraneus	22	22	20	22	14	10	18	30	12	6	20	12	22	10	16	4	14	16	18	14	18	38	22	26	14	18	10	20	16	18	16	16	16	34	12	20	636
d__Archaea	k__unclassified_d__Archaea	p__Candidatus_Verstraetearchaeota	c__Candidatus_Methanomethylicia	o__Candidatus_Methanomethylicales	f__Candidatus_Methanomethylicaceae	g__unclassified_f__Candidatus_Methanomethylicaceae	s__Candidatus_Methanomethyliaceae_archaeon	184	188	272	202	174	272	274	314	250	284	340	220	102	58	112	50	40	52	396	260	304	102	202	156	290	350	334	342	232	484	84	98	124	84	128	136	7494
d__Archaea	k__unclassified_d__Archaea	p__Candidatus_Verstraetearchaeota	c__Candidatus_Methanomethylicia	o__Candidatus_Methanomethylicales	f__unclassified_o__Candidatus_Methanomethylicales	g__unclassified_o__Candidatus_Methanomethylicales	s__Candidatus_Methanomethylicales_archaeon	14	16	16	6	6	4	8	6	6	16	6	4	6	8	2	4	10	12	8	2	8	0	0	4	4	2	10	12	22	16	2	2	2	2	2	0	248
d__Archaea	k__unclassified_d__Archaea	p__Candidatus_Verstraetearchaeota	c__Candidatus_Methanomethylicia	o__unclassified_c__Candidatus_Methanomethylicia	f__unclassified_c__Candidatus_Methanomethylicia	g__unclassified_c__Candidatus_Methanomethylicia	s__Candidatus_Methanomethylicia_archaeon	64	48	58	56	54	86	122	122	118	120	160	112	70	104	76	72	48	108	80	64	104	20	56	32	66	52	54	74	80	86	122	120	114	118	98	166	3104
d__Archaea	k__unclassified_d__Archaea	p__Candidatus_Verstraetearchaeota	c__unclassified_p__Candidatus_Verstraetearchaeota	o__unclassified_p__Candidatus_Verstraetearchaeota	f__unclassified_p__Candidatus_Verstraetearchaeota	g__unclassified_p__Candidatus_Verstraetearchaeota	s__Candidatus_Verstraetearchaeota_archaeon	348	288	346	410	328	542	624	528	762	674	776	552	474	440	294	310	220	316	698	594	712	358	300	216	788	686	678	982	684	1228	376	340	314	372	406	358	18322
d__Archaea	k__unclassified_d__Archaea	p__Candidatus_Woesearchaeota	c__unclassified_p__Candidatus_Woesearchaeota	o__unclassified_p__Candidatus_Woesearchaeota	f__unclassified_p__Candidatus_Woesearchaeota	g__unclassified_p__Candidatus_Woesearchaeota	s__Candidatus_Woesearchaeota_archaeon	12542	9712	10250	17898	16114	19380	19940	21240	18082	18272	19108	16472	17612	17566	13724	16196	26212	13334	9906	9178	9864	7360	12254	11352	16070	14212	14548	25058	18760	25016	9628	9266	8594	9324	9328	9348	532720
d__Archaea	k__unclassified_d__Archaea	p__Candidatus_Woesearchaeota	c__unclassified_p__Candidatus_Woesearchaeota	o__unclassified_p__Candidatus_Woesearchaeota	f__unclassified_p__Candidatus_Woesearchaeota	g__unclassified_p__Candidatus_Woesearchaeota	s__Candidatus_Woesearchaeota_archaeon_B3_Woes	20	6	14	20	16	16	8	8	28	22	28	16	18	6	58	8	0	4	20	22	16	18	10	2	28	24	12	62	50	20	6	0	0	14	2	2	604
d__Archaea	k__unclassified_d__Archaea	p__Candidatus_Woesearchaeota	c__unclassified_p__Candidatus_Woesearchaeota	o__unclassified_p__Candidatus_Woesearchaeota	f__unclassified_p__Candidatus_Woesearchaeota	g__unclassified_p__Candidatus_Woesearchaeota	s__Candidatus_Woesearchaeota_archaeon_CG06_land_8_20_14_3_00_33_13	0	0	0	0	0	0	0	0	0	0	0	0	2	8	6	6	34	6	0	0	0	0	0	0	4	14	4	10	0	14	0	0	0	2	0	0	110
d__Archaea	k__unclassified_d__Archaea	p__Candidatus_Woesearchaeota	c__unclassified_p__Candidatus_Woesearchaeota	o__unclassified_p__Candidatus_Woesearchaeota	f__unclassified_p__Candidatus_Woesearchaeota	g__unclassified_p__Candidatus_Woesearchaeota	s__Candidatus_Woesearchaeota_archaeon_CG07_land_8_20_14_0_80_44_23	4	4	2	14	4	8	12	12	28	4	12	22	4	2	4	10	0	14	0	0	0	2	2	0	6	8	4	58	36	20	0	6	8	0	2	2	314
d__Archaea	k__unclassified_d__Archaea	p__Candidatus_Woesearchaeota	c__unclassified_p__Candidatus_Woesearchaeota	o__unclassified_p__Candidatus_Woesearchaeota	f__unclassified_p__Candidatus_Woesearchaeota	g__unclassified_p__Candidatus_Woesearchaeota	s__Candidatus_Woesearchaeota_archaeon_CG08_land_8_20_14_0_20_43_7	10	8	2	8	18	20	40	24	40	16	24	18	6	12	2	0	2	12	6	4	8	0	0	2	2	4	4	28	4	10	2	4	6	6	6	8	366
d__Archaea	k__unclassified_d__Archaea	p__Candidatus_Woesearchaeota	c__unclassified_p__Candidatus_Woesearchaeota	o__unclassified_p__Candidatus_Woesearchaeota	f__unclassified_p__Candidatus_Woesearchaeota	g__unclassified_p__Candidatus_Woesearchaeota	s__Candidatus_Woesearchaeota_archaeon_CG08_land_8_20_14_0_20_47_9	34	8	14	10	8	6	4	20	8	2	2	10	16	34	22	4	6	18	6	4	8	2	6	14	4	12	8	14	4	6	6	20	4	8	2	8	362
d__Archaea	k__unclassified_d__Archaea	p__Candidatus_Woesearchaeota	c__unclassified_p__Candidatus_Woesearchaeota	o__unclassified_p__Candidatus_Woesearchaeota	f__unclassified_p__Candidatus_Woesearchaeota	g__unclassified_p__Candidatus_Woesearchaeota	s__Candidatus_Woesearchaeota_archaeon_CG10_big_fil_rev_8_21_14_0_10_30_7	10	2	6	6	10	8	6	6	0	6	14	10	10	2	0	0	0	8	0	2	4	10	2	28	20	8	6	82	32	58	2	4	2	2	4	0	370
d__Archaea	k__unclassified_d__Archaea	p__Candidatus_Woesearchaeota	c__unclassified_p__Candidatus_Woesearchaeota	o__unclassified_p__Candidatus_Woesearchaeota	f__unclassified_p__Candidatus_Woesearchaeota	g__unclassified_p__Candidatus_Woesearchaeota	s__Candidatus_Woesearchaeota_archaeon_CG10_big_fil_rev_8_21_14_0_10_32_24	2	0	0	0	0	0	0	0	0	0	0	0	0	0	0	0	0	0	0	0	0	0	6	6	0	0	0	0	0	0	0	0	0	0	0	0	14
d__Archaea	k__unclassified_d__Archaea	p__Candidatus_Woesearchaeota	c__unclassified_p__Candidatus_Woesearchaeota	o__unclassified_p__Candidatus_Woesearchaeota	f__unclassified_p__Candidatus_Woesearchaeota	g__unclassified_p__Candidatus_Woesearchaeota	s__Candidatus_Woesearchaeota_archaeon_CG10_big_fil_rev_8_21_14_0_10_32_9	28	8	2	2	0	2	2	2	0	12	4	0	6	6	6	16	56	6	6	0	2	0	2	2	0	0	2	4	22	2	0	0	0	2	2	0	204
d__Archaea	k__unclassified_d__Archaea	p__Candidatus_Woesearchaeota	c__unclassified_p__Candidatus_Woesearchaeota	o__unclassified_p__Candidatus_Woesearchaeota	f__unclassified_p__Candidatus_Woesearchaeota	g__unclassified_p__Candidatus_Woesearchaeota	s__Candidatus_Woesearchaeota_archaeon_CG10_big_fil_rev_8_21_14_0_10_33_12	4	6	8	8	0	18	8	6	8	6	8	2	10	16	24	12	28	12	2	0	0	0	0	0	0	0	0	12	0	0	0	2	0	2	4	2	208
d__Archaea	k__unclassified_d__Archaea	p__Candidatus_Woesearchaeota	c__unclassified_p__Candidatus_Woesearchaeota	o__unclassified_p__Candidatus_Woesearchaeota	f__unclassified_p__Candidatus_Woesearchaeota	g__unclassified_p__Candidatus_Woesearchaeota	s__Candidatus_Woesearchaeota_archaeon_CG10_big_fil_rev_8_21_14_0_10_34_12	0	0	0	0	0	0	0	0	2	0	0	0	0	0	14	6	18	2	0	2	0	0	0	0	2	0	0	0	2	2	0	0	0	0	0	0	50
d__Archaea	k__unclassified_d__Archaea	p__Candidatus_Woesearchaeota	c__unclassified_p__Candidatus_Woesearchaeota	o__unclassified_p__Candidatus_Woesearchaeota	f__unclassified_p__Candidatus_Woesearchaeota	g__unclassified_p__Candidatus_Woesearchaeota	s__Candidatus_Woesearchaeota_archaeon_CG10_big_fil_rev_8_21_14_0_10_34_8	26	14	36	56	38	36	50	82	36	62	50	30	32	26	20	12	52	8	8	2	14	0	6	10	16	4	6	56	22	50	8	12	4	6	4	14	908
d__Archaea	k__unclassified_d__Archaea	p__Candidatus_Woesearchaeota	c__unclassified_p__Candidatus_Woesearchaeota	o__unclassified_p__Candidatus_Woesearchaeota	f__unclassified_p__Candidatus_Woesearchaeota	g__unclassified_p__Candidatus_Woesearchaeota	s__Candidatus_Woesearchaeota_archaeon_CG10_big_fil_rev_8_21_14_0_10_36_11	0	0	0	20	26	14	24	28	8	34	14	20	4	10	2	4	6	2	0	8	0	0	0	2	0	0	0	0	0	0	0	0	0	0	0	0	226
d__Archaea	k__unclassified_d__Archaea	p__Candidatus_Woesearchaeota	c__unclassified_p__Candidatus_Woesearchaeota	o__unclassified_p__Candidatus_Woesearchaeota	f__unclassified_p__Candidatus_Woesearchaeota	g__unclassified_p__Candidatus_Woesearchaeota	s__Candidatus_Woesearchaeota_archaeon_CG10_big_fil_rev_8_21_14_0_10_37_12	12	0	4	36	34	28	40	22	22	50	44	62	38	28	12	18	18	4	12	8	8	0	12	24	4	4	2	14	6	22	14	6	18	8	12	22	668
d__Archaea	k__unclassified_d__Archaea	p__Candidatus_Woesearchaeota	c__unclassified_p__Candidatus_Woesearchaeota	o__unclassified_p__Candidatus_Woesearchaeota	f__unclassified_p__Candidatus_Woesearchaeota	g__unclassified_p__Candidatus_Woesearchaeota	s__Candidatus_Woesearchaeota_archaeon_CG10_big_fil_rev_8_21_14_0_10_44_13	2	6	4	22	24	30	14	14	10	18	32	20	24	22	12	30	24	20	40	10	4	10	4	16	12	12	8	48	16	14	14	18	26	18	16	14	628
d__Archaea	k__unclassified_d__Archaea	p__Candidatus_Woesearchaeota	c__unclassified_p__Candidatus_Woesearchaeota	o__unclassified_p__Candidatus_Woesearchaeota	f__unclassified_p__Candidatus_Woesearchaeota	g__unclassified_p__Candidatus_Woesearchaeota	s__Candidatus_Woesearchaeota_archaeon_CG10_big_fil_rev_8_21_14_0_10_45_16	8	16	0	12	4	4	2	0	4	4	2	4	4	2	6	2	0	8	8	12	4	12	0	2	2	6	0	18	14	16	2	4	8	0	0	0	190
d__Archaea	k__unclassified_d__Archaea	p__Candidatus_Woesearchaeota	c__unclassified_p__Candidatus_Woesearchaeota	o__unclassified_p__Candidatus_Woesearchaeota	f__unclassified_p__Candidatus_Woesearchaeota	g__unclassified_p__Candidatus_Woesearchaeota	s__Candidatus_Woesearchaeota_archaeon_CG10_big_fil_rev_8_21_14_0_10_45_5	6	20	8	6	2	2	14	4	6	6	8	26	20	6	6	16	40	20	0	0	0	0	0	0	8	2	2	6	0	2	24	14	8	22	10	24	338
d__Archaea	k__unclassified_d__Archaea	p__Candidatus_Woesearchaeota	c__unclassified_p__Candidatus_Woesearchaeota	o__unclassified_p__Candidatus_Woesearchaeota	f__unclassified_p__Candidatus_Woesearchaeota	g__unclassified_p__Candidatus_Woesearchaeota	s__Candidatus_Woesearchaeota_archaeon_CG10_big_fil_rev_8_21_14_0_10_47_5	0	12	4	10	16	2	0	12	2	2	0	8	0	16	8	12	32	28	4	8	6	8	32	0	6	8	0	60	4	6	0	0	6	0	6	4	322
d__Archaea	k__unclassified_d__Archaea	p__Candidatus_Woesearchaeota	c__unclassified_p__Candidatus_Woesearchaeota	o__unclassified_p__Candidatus_Woesearchaeota	f__unclassified_p__Candidatus_Woesearchaeota	g__unclassified_p__Candidatus_Woesearchaeota	s__Candidatus_Woesearchaeota_archaeon_CG11_big_fil_rev_8_21_14_0_20_43_8	14	14	10	18	18	20	8	16	18	8	8	12	20	18	16	14	10	10	10	8	12	14	36	62	50	22	60	112	20	76	34	26	28	30	38	28	918
d__Archaea	k__unclassified_d__Archaea	p__Candidatus_Woesearchaeota	c__unclassified_p__Candidatus_Woesearchaeota	o__unclassified_p__Candidatus_Woesearchaeota	f__unclassified_p__Candidatus_Woesearchaeota	g__unclassified_p__Candidatus_Woesearchaeota	s__Candidatus_Woesearchaeota_archaeon_CG11_big_fil_rev_8_21_14_0_20_57_5	4	8	4	0	0	0	0	0	2	0	2	2	10	6	10	0	6	6	0	2	0	2	2	0	0	4	6	36	14	22	4	0	4	4	8	2	170
d__Archaea	k__unclassified_d__Archaea	p__Candidatus_Woesearchaeota	c__unclassified_p__Candidatus_Woesearchaeota	o__unclassified_p__Candidatus_Woesearchaeota	f__unclassified_p__Candidatus_Woesearchaeota	g__unclassified_p__Candidatus_Woesearchaeota	s__Candidatus_Woesearchaeota_archaeon_CG1_02_33_12	2	6	0	8	4	4	14	16	18	14	4	6	14	0	4	10	32	0	0	8	6	6	4	0	8	0	2	48	28	38	0	0	0	2	0	4	310
d__Archaea	k__unclassified_d__Archaea	p__Candidatus_Woesearchaeota	c__unclassified_p__Candidatus_Woesearchaeota	o__unclassified_p__Candidatus_Woesearchaeota	f__unclassified_p__Candidatus_Woesearchaeota	g__unclassified_p__Candidatus_Woesearchaeota	s__Candidatus_Woesearchaeota_archaeon_CG1_02_47_18	0	24	2	20	6	16	16	14	12	34	70	26	2	8	0	8	6	4	2	4	2	2	0	2	6	6	8	24	10	64	2	8	8	10	22	8	456
d__Archaea	k__unclassified_d__Archaea	p__Candidatus_Woesearchaeota	c__unclassified_p__Candidatus_Woesearchaeota	o__unclassified_p__Candidatus_Woesearchaeota	f__unclassified_p__Candidatus_Woesearchaeota	g__unclassified_p__Candidatus_Woesearchaeota	s__Candidatus_Woesearchaeota_archaeon_CG1_02_57_44	0	0	0	4	2	4	2	0	18	6	2	10	2	0	4	0	6	4	0	4	4	0	0	8	28	32	12	14	12	36	6	12	12	10	2	0	256
d__Archaea	k__unclassified_d__Archaea	p__Candidatus_Woesearchaeota	c__unclassified_p__Candidatus_Woesearchaeota	o__unclassified_p__Candidatus_Woesearchaeota	f__unclassified_p__Candidatus_Woesearchaeota	g__unclassified_p__Candidatus_Woesearchaeota	s__Candidatus_Woesearchaeota_archaeon_CG_4_10_14_0_2_um_filter_33_10	2	0	8	12	12	16	18	24	22	12	24	22	2	2	0	0	0	2	0	6	0	2	4	14	0	2	0	4	8	8	0	0	0	0	0	0	226
d__Archaea	k__unclassified_d__Archaea	p__Candidatus_Woesearchaeota	c__unclassified_p__Candidatus_Woesearchaeota	o__unclassified_p__Candidatus_Woesearchaeota	f__unclassified_p__Candidatus_Woesearchaeota	g__unclassified_p__Candidatus_Woesearchaeota	s__Candidatus_Woesearchaeota_archaeon_CG_4_10_14_0_2_um_filter_33_13	10	0	0	20	14	8	18	14	8	10	12	16	2	14	0	0	18	18	4	4	12	4	10	16	4	0	2	0	6	2	0	4	0	2	2	2	256
d__Archaea	k__unclassified_d__Archaea	p__Candidatus_Woesearchaeota	c__unclassified_p__Candidatus_Woesearchaeota	o__unclassified_p__Candidatus_Woesearchaeota	f__unclassified_p__Candidatus_Woesearchaeota	g__unclassified_p__Candidatus_Woesearchaeota	s__Candidatus_Woesearchaeota_archaeon_CG_4_10_14_0_2_um_filter_57_5	2	2	6	18	6	14	20	18	10	24	8	22	14	10	4	0	4	0	0	0	0	0	2	4	0	0	0	0	2	2	4	8	10	6	4	2	226
d__Archaea	k__unclassified_d__Archaea	p__Candidatus_Woesearchaeota	c__unclassified_p__Candidatus_Woesearchaeota	o__unclassified_p__Candidatus_Woesearchaeota	f__unclassified_p__Candidatus_Woesearchaeota	g__unclassified_p__Candidatus_Woesearchaeota	s__Candidatus_Woesearchaeota_archaeon_CG_4_10_14_0_8_um_filter_47_5	4	2	0	38	16	64	86	54	56	48	46	38	16	12	0	4	8	12	2	0	4	2	16	8	0	12	4	28	6	14	0	4	0	0	4	0	608
d__Archaea	k__unclassified_d__Archaea	p__Candidatus_Woesearchaeota	c__unclassified_p__Candidatus_Woesearchaeota	o__unclassified_p__Candidatus_Woesearchaeota	f__unclassified_p__Candidatus_Woesearchaeota	g__unclassified_p__Candidatus_Woesearchaeota	s__Candidatus_Woesearchaeota_archaeon_RBG_13_36_6	38	2	22	26	42	36	72	96	76	100	76	48	30	42	6	8	6	32	18	6	32	2	2	6	12	8	8	12	0	4	10	10	10	10	14	12	934
d__Archaea	k__unclassified_d__Archaea	p__Candidatus_Woesearchaeota	c__unclassified_p__Candidatus_Woesearchaeota	o__unclassified_p__Candidatus_Woesearchaeota	f__unclassified_p__Candidatus_Woesearchaeota	g__unclassified_p__Candidatus_Woesearchaeota	s__Candidatus_Woesearchaeota_archaeon_ex4484_78	0	0	0	0	6	6	10	14	10	4	18	4	4	6	0	2	0	0	8	4	0	0	0	0	0	0	0	0	0	0	0	8	14	8	10	6	142
d__Archaea	k__unclassified_d__Archaea	p__Euryarchaeota	c__Archaeoglobi	o__Archaeoglobales	f__Archaeoglobaceae	g__Archaeoglobus	s__Archaeoglobus_fulgidus	246	102	134	48	22	36	48	48	44	34	76	44	28	54	74	8	4	22	130	96	102	30	22	22	80	60	30	118	46	130	42	42	32	44	30	56	2184
d__Archaea	k__unclassified_d__Archaea	p__Euryarchaeota	c__Archaeoglobi	o__Archaeoglobales	f__Archaeoglobaceae	g__Archaeoglobus	s__Archaeoglobus_neptunius	24	32	22	44	16	90	52	76	108	18	42	36	6	20	16	30	20	26	12	6	14	18	4	4	44	58	48	74	48	122	22	6	6	20	12	6	1202
d__Archaea	k__unclassified_d__Archaea	p__Euryarchaeota	c__Archaeoglobi	o__Archaeoglobales	f__Archaeoglobaceae	g__Archaeoglobus	s__Archaeoglobus_profundus	32	12	42	28	38	52	68	48	68	74	72	62	32	30	22	56	42	36	18	18	28	10	34	32	26	12	10	102	70	64	10	8	6	2	6	10	1280
d__Archaea	k__unclassified_d__Archaea	p__Euryarchaeota	c__Archaeoglobi	o__Archaeoglobales	f__Archaeoglobaceae	g__Archaeoglobus	s__Archaeoglobus_sp.	162	196	174	198	238	280	280	316	312	422	472	248	166	106	106	118	130	138	220	208	268	142	140	94	382	334	324	880	424	832	166	128	128	134	194	188	9248
d__Archaea	k__unclassified_d__Archaea	p__Euryarchaeota	c__Archaeoglobi	o__Archaeoglobales	f__Archaeoglobaceae	g__Archaeoglobus	s__Archaeoglobus_sp._JdFR-39	16	8	0	2	6	0	0	0	0	0	0	0	24	14	8	6	4	2	0	0	0	0	0	0	0	2	2	6	0	6	0	0	0	4	0	0	110
d__Archaea	k__unclassified_d__Archaea	p__Euryarchaeota	c__Archaeoglobi	o__Archaeoglobales	f__Archaeoglobaceae	g__Archaeoglobus	s__Archaeoglobus_sp._UBA230	0	0	0	6	8	6	10	2	4	6	0	0	0	0	0	0	0	0	0	0	0	0	0	0	0	4	0	0	0	0	0	0	0	0	0	0	46
d__Archaea	k__unclassified_d__Archaea	p__Euryarchaeota	c__Archaeoglobi	o__Archaeoglobales	f__Archaeoglobaceae	g__Archaeoglobus	s__Archaeoglobus_sp._UBA231	0	0	0	0	0	0	0	0	0	0	0	0	0	0	0	0	0	0	0	0	0	0	0	0	6	0	0	2	0	0	0	0	0	0	0	0	8
d__Archaea	k__unclassified_d__Archaea	p__Euryarchaeota	c__Archaeoglobi	o__Archaeoglobales	f__Archaeoglobaceae	g__Archaeoglobus	s__Archaeoglobus_sulfaticallidus	80	54	82	62	48	64	102	80	106	130	148	80	38	60	46	88	64	94	34	34	22	10	18	10	232	186	166	234	140	342	48	42	62	40	70	56	3172
d__Archaea	k__unclassified_d__Archaea	p__Euryarchaeota	c__Archaeoglobi	o__Archaeoglobales	f__Archaeoglobaceae	g__Archaeoglobus	s__Archaeoglobus_veneficus	46	44	54	120	112	126	120	116	126	72	170	94	128	112	42	54	44	82	86	90	122	42	108	76	146	190	140	374	160	292	64	90	84	82	76	98	3982
d__Archaea	k__unclassified_d__Archaea	p__Euryarchaeota	c__Archaeoglobi	o__Archaeoglobales	f__Archaeoglobaceae	g__Ferroglobus	s__Ferroglobus_placidus	118	64	70	58	50	46	70	52	52	36	46	44	28	34	32	50	64	38	40	6	48	22	34	14	46	38	24	94	44	86	16	24	30	12	30	30	1590
d__Archaea	k__unclassified_d__Archaea	p__Euryarchaeota	c__Archaeoglobi	o__Archaeoglobales	f__Archaeoglobaceae	g__Ferroglobus	s__Ferroglobus_sp.	30	30	16	96	76	182	186	186	204	262	294	276	100	44	36	82	86	78	48	48	66	26	30	44	52	42	54	144	58	54	10	10	6	16	6	12	2990
d__Archaea	k__unclassified_d__Archaea	p__Euryarchaeota	c__Archaeoglobi	o__Archaeoglobales	f__Archaeoglobaceae	g__Geoglobus	s__Geoglobus_acetivorans	42	40	66	90	104	120	160	154	182	142	158	130	46	48	34	20	34	50	26	32	58	8	20	20	26	20	32	12	40	24	38	42	52	36	36	32	2174
d__Archaea	k__unclassified_d__Archaea	p__Euryarchaeota	c__Archaeoglobi	o__Archaeoglobales	f__Archaeoglobaceae	g__Geoglobus	s__Geoglobus_ahangari	54	30	42	100	138	180	218	198	170	284	326	262	54	34	28	46	104	98	20	12	22	18	16	12	68	32	70	70	46	82	70	80	42	80	62	62	3230
d__Archaea	k__unclassified_d__Archaea	p__Euryarchaeota	c__Archaeoglobi	o__Archaeoglobales	f__Archaeoglobaceae	g__unclassified_f__Archaeoglobaceae	s__Archaeoglobaceae_archaeon	98	82	120	72	116	120	160	152	154	154	252	156	102	108	86	58	30	84	278	186	210	66	98	54	134	110	52	286	144	260	84	76	68	68	74	102	4454
d__Archaea	k__unclassified_d__Archaea	p__Euryarchaeota	c__Archaeoglobi	o__Archaeoglobales	f__unclassified_o__Archaeoglobales	g__unclassified_o__Archaeoglobales	s__Archaeoglobales_archaeon	458	420	368	532	550	664	704	818	820	972	1086	862	490	462	348	414	320	522	420	346	648	162	204	146	526	448	408	844	478	854	184	210	204	210	266	286	17654
d__Archaea	k__unclassified_d__Archaea	p__Euryarchaeota	c__Archaeoglobi	o__Archaeoglobales	f__unclassified_o__Archaeoglobales	g__unclassified_o__Archaeoglobales	s__Archaeoglobales_archaeon_ex4484_92	4	12	8	4	12	14	0	10	6	4	12	14	32	10	14	24	64	22	2	2	0	0	0	0	6	2	16	34	14	20	0	2	0	4	4	8	380
d__Archaea	k__unclassified_d__Archaea	p__Euryarchaeota	c__Archaeoglobi	o__unclassified_c__Archaeoglobi	f__unclassified_c__Archaeoglobi	g__unclassified_c__Archaeoglobi	s__Archaeoglobi_archaeon	146	134	144	122	156	270	234	234	184	250	306	300	82	112	56	134	124	138	60	44	82	28	68	86	68	60	106	156	64	156	60	48	80	82	56	64	4494
d__Archaea	k__unclassified_d__Archaea	p__Euryarchaeota	c__Candidatus_Methanofastidiosa	o__unclassified_c__Candidatus_Methanofastidiosa	f__unclassified_c__Candidatus_Methanofastidiosa	g__Candidatus_Methanofastidiosum	s__Candidatus_Methanofastidiosum_methylthiophilus	676	412	582	256	264	420	468	386	414	468	520	396	612	592	368	810	1620	550	286	254	290	212	132	158	366	246	238	1002	472	734	264	258	250	270	256	312	15814
d__Archaea	k__unclassified_d__Archaea	p__Euryarchaeota	c__Candidatus_Methanofastidiosa	o__unclassified_c__Candidatus_Methanofastidiosa	f__unclassified_c__Candidatus_Methanofastidiosa	g__Candidatus_Methanofastidiosum	s__Candidatus_Methanofastidiosum_sp.	748	342	582	182	148	250	180	218	248	216	214	190	724	524	446	1476	6308	826	96	108	138	80	116	64	428	324	358	764	396	864	176	228	202	238	180	236	18818
d__Archaea	k__unclassified_d__Archaea	p__Euryarchaeota	c__Candidatus_Methanofastidiosa	o__unclassified_c__Candidatus_Methanofastidiosa	f__unclassified_c__Candidatus_Methanofastidiosa	g__unclassified_c__Candidatus_Methanofastidiosa	s__Candidatus_Methanofastidiosa_archaeon	2112	982	1778	492	482	506	588	638	812	654	650	554	1758	1252	910	3106	11038	1586	864	616	852	372	246	182	1170	1158	1192	1854	1008	1754	780	726	734	816	854	808	45884
d__Archaea	k__unclassified_d__Archaea	p__Euryarchaeota	c__Candidatus_Methanoliparia	o__Candidatus_Methanoliparales	f__Candidatus_Methanoliparaceae	g__Candidatus_Methanoliparum	s__Candidatus_Methanoliparum_sp._LAM-1	26	22	16	14	10	46	10	26	40	20	78	18	6	8	2	6	2	6	6	12	8	10	8	6	58	82	36	48	30	72	4	14	4	16	8	18	796
d__Archaea	k__unclassified_d__Archaea	p__Euryarchaeota	c__Candidatus_Methanoliparia	o__Candidatus_Methanoliparales	f__Candidatus_Methanoliparaceae	g__Candidatus_Methanoliparum	s__Candidatus_Methanoliparum_thermophilum	0	8	6	8	0	2	10	0	10	0	4	2	10	2	2	0	0	2	0	0	0	0	0	0	0	0	8	2	4	10	0	0	0	0	0	0	90
d__Archaea	k__unclassified_d__Archaea	p__Euryarchaeota	c__Candidatus_Methanoliparia	o__Candidatus_Methanoliparales	f__Candidatus_Methanollivieraceae	g__Candidatus_Methanolliviera	s__Candidatus_Methanolliviera_hydrocarbonicum	174	150	170	278	298	416	372	378	446	436	486	372	200	168	112	208	208	166	208	166	210	172	82	80	564	488	546	614	456	780	100	118	96	104	100	116	10038
d__Archaea	k__unclassified_d__Archaea	p__Euryarchaeota	c__Candidatus_Methanoliparia	o__Candidatus_Methanoliparales	f__Candidatus_Methanollivieraceae	g__unclassified_f__Candidatus_Methanollivieraceae	s__Candidatus_Methanolliviera_sp._GoM_asphalt	42	48	76	56	52	24	56	42	96	100	96	42	90	104	104	58	26	60	96	80	128	38	26	8	152	156	138	306	102	330	52	46	54	86	44	76	3090
d__Archaea	k__unclassified_d__Archaea	p__Euryarchaeota	c__Candidatus_Methanoliparia	o__Candidatus_Methanoliparales	f__Candidatus_Methanollivieraceae	g__unclassified_f__Candidatus_Methanollivieraceae	s__Candidatus_Methanolliviera_sp._GoM_oil	78	120	70	74	38	102	50	44	68	62	82	66	66	52	38	60	72	48	210	120	162	54	72	50	180	118	190	1198	332	1002	48	64	34	50	46	48	5168
d__Archaea	k__unclassified_d__Archaea	p__Euryarchaeota	c__Candidatus_Nanohaloarchaea	o__unclassified_c__Candidatus_Nanohaloarchaea	f__unclassified_c__Candidatus_Nanohaloarchaea	g__Candidatus_Nanosalina	s__Candidatus_Nanosalina_sp._J07AB43	0	0	0	0	0	0	0	0	0	0	0	0	0	0	2	0	0	0	2	0	2	0	2	8	0	0	0	2	0	0	0	2	0	2	0	0	22
d__Archaea	k__unclassified_d__Archaea	p__Euryarchaeota	c__Candidatus_Nanohaloarchaea	o__unclassified_c__Candidatus_Nanohaloarchaea	f__unclassified_c__Candidatus_Nanohaloarchaea	g__Candidatus_Nanosalinarum	s__Candidatus_Nanosalinarum_sp._J07AB56	0	0	0	0	0	0	0	0	0	0	0	0	0	0	0	0	0	0	4	6	2	0	8	0	0	0	0	6	0	0	0	0	0	0	0	0	26
d__Archaea	k__unclassified_d__Archaea	p__Euryarchaeota	c__Candidatus_Nanohaloarchaea	o__unclassified_c__Candidatus_Nanohaloarchaea	f__unclassified_c__Candidatus_Nanohaloarchaea	g__unclassified_c__Candidatus_Nanohaloarchaea	s__Candidatus_Haloredivivus_sp._G17	0	0	2	0	0	0	4	0	0	0	0	0	2	12	10	2	6	10	4	4	6	0	6	8	0	2	2	32	10	30	4	0	4	0	2	0	162
d__Archaea	k__unclassified_d__Archaea	p__Euryarchaeota	c__Candidatus_Nanohaloarchaea	o__unclassified_c__Candidatus_Nanohaloarchaea	f__unclassified_c__Candidatus_Nanohaloarchaea	g__unclassified_c__Candidatus_Nanohaloarchaea	s__Candidatus_Nanohaloarchaea_archaeon	6	4	14	6	6	16	12	6	24	12	12	28	4	6	16	6	16	20	26	14	34	0	0	12	28	20	32	36	10	38	6	0	2	2	0	0	474
d__Archaea	k__unclassified_d__Archaea	p__Euryarchaeota	c__Candidatus_Nanohaloarchaea	o__unclassified_c__Candidatus_Nanohaloarchaea	f__unclassified_c__Candidatus_Nanohaloarchaea	g__unclassified_c__Candidatus_Nanohaloarchaea	s__Nanohaloarchaea_archaeon_H01	0	0	0	4	4	0	0	0	0	0	0	0	0	0	0	0	0	0	0	0	0	0	0	0	0	0	0	0	0	0	0	0	0	2	0	0	10
d__Archaea	k__unclassified_d__Archaea	p__Euryarchaeota	c__Candidatus_Nanohaloarchaea	o__unclassified_c__Candidatus_Nanohaloarchaea	f__unclassified_c__Candidatus_Nanohaloarchaea	g__unclassified_c__Candidatus_Nanohaloarchaea	s__Nanohaloarchaea_archaeon_H12	0	0	0	0	0	0	0	0	0	0	0	0	0	0	2	0	8	0	0	0	0	0	0	0	0	0	0	0	0	0	0	0	0	0	0	0	10
d__Archaea	k__unclassified_d__Archaea	p__Euryarchaeota	c__Candidatus_Nanohaloarchaea	o__unclassified_c__Candidatus_Nanohaloarchaea	f__unclassified_c__Candidatus_Nanohaloarchaea	g__unclassified_c__Candidatus_Nanohaloarchaea	s__Nanohaloarchaea_archaeon_SG9	0	0	0	0	0	0	0	0	0	0	0	0	0	0	0	0	0	0	0	0	0	0	0	0	0	0	0	6	2	0	0	0	0	0	0	0	8
d__Archaea	k__unclassified_d__Archaea	p__Euryarchaeota	c__Candidatus_Nanohaloarchaea	o__unclassified_c__Candidatus_Nanohaloarchaea	f__unclassified_c__Candidatus_Nanohaloarchaea	g__unclassified_c__Candidatus_Nanohaloarchaea	s__Nanohaloarchaea_archaeon_SW_4_43_9	0	0	2	0	0	0	0	0	0	0	0	0	6	0	0	14	64	6	0	0	0	0	0	0	0	0	0	0	0	0	2	0	0	0	0	0	94
d__Archaea	k__unclassified_d__Archaea	p__Euryarchaeota	c__Candidatus_Nanohaloarchaea	o__unclassified_c__Candidatus_Nanohaloarchaea	f__unclassified_c__Candidatus_Nanohaloarchaea	g__unclassified_c__Candidatus_Nanohaloarchaea	s__Nanohaloarchaea_archaeon_SW_7_43_1	2	16	4	4	6	6	4	0	2	4	6	2	10	24	4	0	0	0	0	0	0	2	0	0	0	0	0	4	2	4	0	0	0	0	0	0	106
d__Archaea	k__unclassified_d__Archaea	p__Euryarchaeota	c__Candidatus_Nanohaloarchaea	o__unclassified_c__Candidatus_Nanohaloarchaea	f__unclassified_c__Candidatus_Nanohaloarchaea	g__unclassified_c__Candidatus_Nanohaloarchaea	s__Nanohaloarchaea_archaeon_SW_7_46_7	0	0	0	26	26	18	8	12	2	12	6	22	30	20	4	4	0	0	0	0	0	0	0	0	0	0	0	0	0	0	0	6	4	4	2	4	210
d__Archaea	k__unclassified_d__Archaea	p__Euryarchaeota	c__Halobacteria	o__Halobacteriales	f__Haladaptataceae	g__Haladaptatus	s__Haladaptatus_cibarius	0	2	0	6	8	10	4	6	12	14	6	12	8	6	0	12	8	10	4	14	10	14	20	16	16	22	34	22	14	46	10	2	10	14	8	2	402
d__Archaea	k__unclassified_d__Archaea	p__Euryarchaeota	c__Halobacteria	o__Halobacteriales	f__Haladaptataceae	g__Haladaptatus	s__Haladaptatus_halobius	48	68	68	216	206	200	244	244	204	190	240	160	228	222	178	142	82	86	74	56	100	56	62	76	74	54	38	86	60	72	90	84	80	78	74	78	4318
d__Archaea	k__unclassified_d__Archaea	p__Euryarchaeota	c__Halobacteria	o__Halobacteriales	f__Haladaptataceae	g__Haladaptatus	s__Haladaptatus_litoreus	54	64	48	64	50	74	48	78	52	36	36	40	36	54	10	32	8	14	28	18	12	24	10	18	36	20	28	16	16	24	14	4	14	6	12	26	1124
d__Archaea	k__unclassified_d__Archaea	p__Euryarchaeota	c__Halobacteria	o__Halobacteriales	f__Haladaptataceae	g__Haladaptatus	s__Haladaptatus_pallidirubidus	16	26	34	44	66	48	70	64	66	72	68	58	52	94	50	34	18	40	30	26	32	10	36	16	72	88	84	46	44	84	54	58	52	60	84	58	1854
d__Archaea	k__unclassified_d__Archaea	p__Euryarchaeota	c__Halobacteria	o__Halobacteriales	f__Haladaptataceae	g__Haladaptatus	s__Haladaptatus_paucihalophilus	16	12	8	60	46	62	44	50	64	48	86	50	66	88	28	36	12	62	60	38	40	34	14	20	54	60	56	46	34	54	18	14	16	18	28	22	1464
d__Archaea	k__unclassified_d__Archaea	p__Euryarchaeota	c__Halobacteria	o__Halobacteriales	f__Haladaptataceae	g__Haladaptatus	s__Haladaptatus_salinisoli	42	32	40	148	126	124	140	110	164	128	188	126	232	184	126	172	120	174	42	48	58	86	164	78	166	126	164	114	90	126	62	40	80	82	106	102	4110
d__Archaea	k__unclassified_d__Archaea	p__Euryarchaeota	c__Halobacteria	o__Halobacteriales	f__Haladaptataceae	g__Haladaptatus	s__Haladaptatus_sp.	68	90	58	322	248	362	344	362	330	458	458	306	318	246	148	250	154	210	124	72	126	122	108	138	218	264	238	308	186	244	140	92	104	120	98	126	7560
d__Archaea	k__unclassified_d__Archaea	p__Euryarchaeota	c__Halobacteria	o__Halobacteriales	f__Haladaptataceae	g__Haladaptatus	s__Haladaptatus_sp._AB618	18	4	14	354	222	280	298	336	274	350	340	328	168	130	76	20	10	80	36	40	52	26	16	42	118	114	122	74	52	106	22	6	14	20	14	6	4182
d__Archaea	k__unclassified_d__Archaea	p__Euryarchaeota	c__Halobacteria	o__Halobacteriales	f__Haladaptataceae	g__Haladaptatus	s__Haladaptatus_sp._AB643	14	2	2	94	62	64	58	60	36	28	36	28	18	26	12	22	12	16	0	0	4	0	4	0	0	0	0	0	0	0	10	14	10	2	2	2	638
d__Archaea	k__unclassified_d__Archaea	p__Euryarchaeota	c__Halobacteria	o__Halobacteriales	f__Haladaptataceae	g__Haladaptatus	s__Haladaptatus_sp._DYF46	184	104	122	212	176	208	246	306	272	230	274	248	194	452	180	112	44	102	156	158	178	132	78	60	126	160	94	120	126	188	90	106	124	100	120	136	5918
d__Archaea	k__unclassified_d__Archaea	p__Euryarchaeota	c__Halobacteria	o__Halobacteriales	f__Haladaptataceae	g__Haladaptatus	s__Haladaptatus_sp._DYSN1	20	16	10	42	44	34	36	22	42	32	30	48	64	62	52	64	66	50	62	56	114	258	74	36	66	58	66	44	90	52	104	96	102	74	80	88	2254
d__Archaea	k__unclassified_d__Archaea	p__Euryarchaeota	c__Halobacteria	o__Halobacteriales	f__Haladaptataceae	g__Haladaptatus	s__Haladaptatus_sp._QDMS2	24	0	0	24	28	10	4	20	16	18	8	2	8	32	14	12	6	6	30	16	12	10	6	2	16	16	10	14	4	8	10	12	10	10	4	10	432
d__Archaea	k__unclassified_d__Archaea	p__Euryarchaeota	c__Halobacteria	o__Halobacteriales	f__Haladaptataceae	g__Haladaptatus	s__Haladaptatus_sp._R4	52	24	24	70	60	62	60	76	44	82	84	104	24	12	18	34	6	62	22	14	16	18	20	30	58	48	36	136	26	98	30	48	26	14	30	32	1600
d__Archaea	k__unclassified_d__Archaea	p__Euryarchaeota	c__Halobacteria	o__Halobacteriales	f__Haladaptataceae	g__Haladaptatus	s__Haladaptatus_sp._T7	64	58	66	202	148	192	216	170	194	190	186	160	106	148	58	52	40	120	208	212	290	244	114	118	366	292	376	326	336	414	130	120	146	150	132	82	6426
d__Archaea	k__unclassified_d__Archaea	p__Euryarchaeota	c__Halobacteria	o__Halobacteriales	f__Haladaptataceae	g__Haladaptatus	s__Haladaptatus_sp._W1	22	30	24	104	76	116	84	90	120	126	200	90	152	246	88	134	136	100	30	42	32	32	34	16	82	80	42	78	72	104	32	62	52	48	46	36	2858
d__Archaea	k__unclassified_d__Archaea	p__Euryarchaeota	c__Halobacteria	o__Halobacteriales	f__Haladaptataceae	g__Haladaptatus	s__Haladaptatus_sp._YSMS36	4	8	2	26	10	38	28	26	32	42	36	26	12	6	10	6	8	10	22	4	16	6	34	34	2	2	2	0	0	0	18	4	4	4	10	4	496
d__Archaea	k__unclassified_d__Archaea	p__Euryarchaeota	c__Halobacteria	o__Halobacteriales	f__Haladaptataceae	g__Haladaptatus	s__Haladaptatus_sp._ZJ1	56	34	22	20	40	20	60	44	30	44	58	32	112	100	64	38	36	32	32	44	42	62	14	16	126	108	106	148	112	202	58	68	68	52	72	72	2244
d__Archaea	k__unclassified_d__Archaea	p__Euryarchaeota	c__Halobacteria	o__Halobacteriales	f__Haladaptataceae	g__Halorussus	s__Halorussus_amylolyticus	16	20	8	18	24	40	44	26	54	42	42	20	56	48	46	30	14	24	26	30	38	42	14	14	94	88	104	84	100	118	50	40	26	54	36	48	1578
d__Archaea	k__unclassified_d__Archaea	p__Euryarchaeota	c__Halobacteria	o__Halobacteriales	f__Haladaptataceae	g__Halorussus	s__Halorussus_halobius	6	10	8	16	10	14	16	8	24	8	46	18	10	10	18	0	0	18	4	12	2	18	28	6	32	36	66	32	16	66	8	2	2	10	0	2	582
d__Archaea	k__unclassified_d__Archaea	p__Euryarchaeota	c__Halobacteria	o__Halobacteriales	f__Haladaptataceae	g__Halorussus	s__Halorussus_halophilus	168	194	148	324	264	272	336	240	298	188	262	248	310	364	238	194	232	148	178	200	206	170	124	86	294	234	238	162	158	274	178	174	192	232	208	194	7930
d__Archaea	k__unclassified_d__Archaea	p__Euryarchaeota	c__Halobacteria	o__Halobacteriales	f__Haladaptataceae	g__Halorussus	s__Halorussus_litoreus	0	10	2	10	24	12	26	20	16	40	30	32	16	26	6	8	32	14	18	10	12	16	10	8	90	96	112	158	120	136	16	10	12	16	12	12	1188
d__Archaea	k__unclassified_d__Archaea	p__Euryarchaeota	c__Halobacteria	o__Halobacteriales	f__Haladaptataceae	g__Halorussus	s__Halorussus_marinus	102	60	34	62	44	104	72	72	62	46	32	46	42	22	12	18	12	18	14	0	6	8	10	12	2	18	30	24	30	24	26	26	26	26	16	26	1184
d__Archaea	k__unclassified_d__Archaea	p__Euryarchaeota	c__Halobacteria	o__Halobacteriales	f__Haladaptataceae	g__Halorussus	s__Halorussus_pelagicus	30	6	14	16	32	12	18	38	34	24	30	16	8	18	14	0	8	10	10	6	8	22	8	4	10	10	10	16	14	24	4	14	14	6	16	14	538
d__Archaea	k__unclassified_d__Archaea	p__Euryarchaeota	c__Halobacteria	o__Halobacteriales	f__Haladaptataceae	g__Halorussus	s__Halorussus_rarus	0	0	0	22	4	20	6	0	8	8	14	10	2	2	2	2	8	4	2	0	2	0	0	0	0	0	0	4	0	2	0	4	0	0	2	0	128
d__Archaea	k__unclassified_d__Archaea	p__Euryarchaeota	c__Halobacteria	o__Halobacteriales	f__Haladaptataceae	g__Halorussus	s__Halorussus_ruber	42	32	32	40	22	44	52	46	40	42	14	32	72	24	34	44	20	38	4	12	4	28	34	16	18	8	4	20	10	34	16	20	10	32	18	34	992
d__Archaea	k__unclassified_d__Archaea	p__Euryarchaeota	c__Halobacteria	o__Halobacteriales	f__Haladaptataceae	g__Halorussus	s__Halorussus_salinus	80	56	54	14	22	30	26	10	52	34	34	20	264	128	132	148	198	86	16	18	4	10	4	4	34	18	18	16	16	32	38	44	44	50	44	34	1832
d__Archaea	k__unclassified_d__Archaea	p__Euryarchaeota	c__Halobacteria	o__Halobacteriales	f__Haladaptataceae	g__Halorussus	s__Halorussus_sp.	378	120	216	30	4	20	16	12	28	2	4	8	72	40	62	30	34	32	48	28	46	50	38	24	16	30	24	20	22	36	10	28	24	22	20	16	1610
d__Archaea	k__unclassified_d__Archaea	p__Euryarchaeota	c__Halobacteria	o__Halobacteriales	f__Haladaptataceae	g__Halorussus	s__Halorussus_sp._DT72	272	146	204	38	40	40	42	38	54	22	18	22	136	96	126	58	44	78	40	20	56	22	24	18	24	22	16	12	16	24	140	138	108	134	132	114	2534
d__Archaea	k__unclassified_d__Archaea	p__Euryarchaeota	c__Halobacteria	o__Halobacteriales	f__Haladaptataceae	g__Halorussus	s__Halorussus_sp._DT80	102	50	46	26	30	30	50	56	52	22	34	44	40	38	14	30	24	30	20	12	16	48	14	20	28	30	16	114	48	90	10	20	2	20	12	12	1250
d__Archaea	k__unclassified_d__Archaea	p__Euryarchaeota	c__Halobacteria	o__Halobacteriales	f__Haladaptataceae	g__Halorussus	s__Halorussus_sp._JP-T4	0	0	0	0	0	8	4	6	8	0	2	4	2	6	8	8	0	0	14	0	20	0	6	0	0	0	2	0	4	0	0	0	0	0	4	0	106
d__Archaea	k__unclassified_d__Archaea	p__Euryarchaeota	c__Halobacteria	o__Halobacteriales	f__Haladaptataceae	g__Halorussus	s__Halorussus_sp._MSC15.2	10	8	10	36	38	66	36	22	40	60	58	32	56	52	28	66	20	70	2	0	2	0	0	8	18	4	6	2	0	0	8	18	14	34	26	12	862
d__Archaea	k__unclassified_d__Archaea	p__Euryarchaeota	c__Halobacteria	o__Halobacteriales	f__Haladaptataceae	g__Halorussus	s__Halorussus_sp._XZYJ18	14	4	6	36	46	46	38	42	46	40	50	84	18	10	6	20	16	26	2	6	12	4	12	0	42	40	50	34	36	24	8	6	8	10	4	6	852
d__Archaea	k__unclassified_d__Archaea	p__Euryarchaeota	c__Halobacteria	o__Halobacteriales	f__Haladaptataceae	g__Halorussus	s__Halorussus_sp._XZYJT10	48	50	40	60	74	106	80	54	106	74	106	72	150	92	60	114	84	58	22	36	46	18	16	16	54	40	42	76	34	48	82	28	38	60	56	54	2194
d__Archaea	k__unclassified_d__Archaea	p__Euryarchaeota	c__Halobacteria	o__Halobacteriales	f__Haladaptataceae	g__Halorussus	s__Halorussus_sp._XZYJT40	2	2	0	26	22	42	30	46	22	32	38	12	10	18	2	2	0	12	2	14	10	6	32	4	0	0	2	0	0	0	4	0	0	4	0	0	396
d__Archaea	k__unclassified_d__Archaea	p__Euryarchaeota	c__Halobacteria	o__Halobacteriales	f__Haladaptataceae	g__Halorussus	s__Halorussus_sp._XZYJT49	8	12	20	2	8	20	6	4	6	10	8	10	20	22	16	32	8	26	10	12	6	14	10	12	32	28	38	20	26	32	4	12	10	8	12	18	542
d__Archaea	k__unclassified_d__Archaea	p__Euryarchaeota	c__Halobacteria	o__Halobacteriales	f__Haladaptataceae	g__Halorussus	s__Halorussus_sp._YCN54	18	0	0	8	16	24	8	22	12	4	6	14	18	2	6	22	2	12	6	4	18	18	32	20	24	26	18	40	20	34	4	12	10	8	8	0	496
d__Archaea	k__unclassified_d__Archaea	p__Euryarchaeota	c__Halobacteria	o__Halobacteriales	f__Haloarculaceae	g__Halapricum	s__Halapricum_desulfuricans	28	28	12	52	48	56	58	64	78	78	104	80	72	88	52	68	110	82	78	28	116	62	82	40	134	118	138	42	62	106	60	56	56	60	74	56	2526
d__Archaea	k__unclassified_d__Archaea	p__Euryarchaeota	c__Halobacteria	o__Halobacteriales	f__Haloarculaceae	g__Halapricum	s__Halapricum_hydrolyticum	26	42	26	12	10	6	24	12	20	8	12	8	44	20	22	40	8	16	54	52	28	48	16	16	28	36	34	16	36	28	30	16	16	24	18	30	882
d__Archaea	k__unclassified_d__Archaea	p__Euryarchaeota	c__Halobacteria	o__Halobacteriales	f__Haloarculaceae	g__Halapricum	s__Halapricum_salinum	86	58	28	40	30	24	30	44	22	36	56	74	32	28	28	28	6	14	48	48	36	22	20	32	62	42	62	28	44	64	28	34	18	26	28	36	1342
d__Archaea	k__unclassified_d__Archaea	p__Euryarchaeota	c__Halobacteria	o__Halobacteriales	f__Haloarculaceae	g__Halapricum	s__Halapricum_sp._CBA1109	34	34	26	18	4	2	10	0	0	4	6	0	20	4	2	36	10	10	2	14	2	8	4	18	18	2	6	6	4	20	0	0	4	0	2	2	332
d__Archaea	k__unclassified_d__Archaea	p__Euryarchaeota	c__Halobacteria	o__Halobacteriales	f__Haloarculaceae	g__Haloarcula	s__Haloarcula_amylolytica	0	0	4	6	0	2	0	2	2	4	4	0	0	2	10	2	2	2	0	0	0	0	4	0	0	0	0	0	2	0	14	4	6	12	0	2	86
d__Archaea	k__unclassified_d__Archaea	p__Euryarchaeota	c__Halobacteria	o__Halobacteriales	f__Haloarculaceae	g__Haloarcula	s__Haloarcula_argentinensis	4	2	4	24	32	24	36	32	14	22	48	6	24	18	16	16	0	10	6	16	10	6	4	2	4	0	0	8	14	6	2	20	14	12	18	16	490
d__Archaea	k__unclassified_d__Archaea	p__Euryarchaeota	c__Halobacteria	o__Halobacteriales	f__Haloarculaceae	g__Haloarcula	s__Haloarcula_californiae	0	0	0	4	0	0	0	0	2	0	2	2	0	10	4	0	0	4	10	2	14	6	6	0	8	10	8	10	12	16	0	2	2	0	0	0	134
d__Archaea	k__unclassified_d__Archaea	p__Euryarchaeota	c__Halobacteria	o__Halobacteriales	f__Haloarculaceae	g__Haloarcula	s__Haloarcula_hispanica	0	0	0	0	6	2	10	2	4	6	14	0	4	2	0	0	0	4	6	0	12	6	6	2	22	4	4	0	0	2	0	2	2	2	4	0	128
d__Archaea	k__unclassified_d__Archaea	p__Euryarchaeota	c__Halobacteria	o__Halobacteriales	f__Haloarculaceae	g__Haloarcula	s__Haloarcula_japonica	6	12	14	4	6	6	16	12	8	2	6	10	8	8	4	6	0	0	20	16	16	10	36	2	6	10	6	6	4	8	0	2	0	6	0	2	278
d__Archaea	k__unclassified_d__Archaea	p__Euryarchaeota	c__Halobacteria	o__Halobacteriales	f__Haloarculaceae	g__Haloarcula	s__Haloarcula_mannanilytica	4	8	14	24	4	6	4	8	18	8	2	4	4	2	2	4	0	6	8	0	8	0	0	2	4	2	2	12	8	10	4	2	0	4	4	2	194
d__Archaea	k__unclassified_d__Archaea	p__Euryarchaeota	c__Halobacteria	o__Halobacteriales	f__Haloarculaceae	g__Haloarcula	s__Haloarcula_marismortui	0	2	0	22	16	12	12	14	22	12	24	12	0	2	0	0	0	0	4	0	2	0	4	2	0	10	6	0	0	10	0	0	0	0	0	2	190
d__Archaea	k__unclassified_d__Archaea	p__Euryarchaeota	c__Halobacteria	o__Halobacteriales	f__Haloarculaceae	g__Haloarcula	s__Haloarcula_quadrata	8	0	4	28	20	14	10	12	10	40	34	6	54	24	28	16	18	10	8	2	6	2	8	2	12	4	2	0	0	6	2	0	0	0	4	0	394
d__Archaea	k__unclassified_d__Archaea	p__Euryarchaeota	c__Halobacteria	o__Halobacteriales	f__Haloarculaceae	g__Haloarcula	s__Haloarcula_rubripromontorii	14	22	12	18	16	40	18	20	12	30	38	34	18	6	2	4	30	8	14	14	28	30	10	6	8	14	8	16	14	18	10	4	4	2	6	10	558
d__Archaea	k__unclassified_d__Archaea	p__Euryarchaeota	c__Halobacteria	o__Halobacteriales	f__Haloarculaceae	g__Haloarcula	s__Haloarcula_salaria	2	0	0	0	0	0	0	0	0	0	0	0	0	0	0	0	0	0	0	0	0	0	0	0	0	0	0	0	0	2	0	0	0	0	0	0	4
d__Archaea	k__unclassified_d__Archaea	p__Euryarchaeota	c__Halobacteria	o__Halobacteriales	f__Haloarculaceae	g__Haloarcula	s__Haloarcula_salina	10	14	14	6	14	4	26	14	30	24	24	6	40	20	44	32	24	54	16	10	16	8	4	6	24	12	16	6	10	22	2	6	6	14	10	6	594
d__Archaea	k__unclassified_d__Archaea	p__Euryarchaeota	c__Halobacteria	o__Halobacteriales	f__Haloarculaceae	g__Haloarcula	s__Haloarcula_sebkhae	18	14	4	26	10	40	12	18	30	10	10	18	50	38	24	88	110	44	0	4	4	0	2	12	0	0	0	0	2	8	28	4	12	10	8	12	670
d__Archaea	k__unclassified_d__Archaea	p__Euryarchaeota	c__Halobacteria	o__Halobacteriales	f__Haloarculaceae	g__Haloarcula	s__Haloarcula_sinaiiensis	0	0	0	2	6	4	16	8	10	20	22	26	0	0	0	0	0	0	2	0	0	0	0	14	0	0	4	0	0	0	0	0	0	0	0	0	134
d__Archaea	k__unclassified_d__Archaea	p__Euryarchaeota	c__Halobacteria	o__Halobacteriales	f__Haloarculaceae	g__Haloarcula	s__Haloarcula_sp.	6	22	44	20	12	38	26	26	22	24	32	24	44	42	46	12	24	8	24	18	10	44	8	8	14	12	16	12	8	32	16	20	16	22	34	18	804
d__Archaea	k__unclassified_d__Archaea	p__Euryarchaeota	c__Halobacteria	o__Halobacteriales	f__Haloarculaceae	g__Haloarcula	s__Haloarcula_sp._Atlit-120R	44	34	42	72	70	66	60	76	104	64	102	74	46	30	20	34	24	56	8	8	2	2	6	6	8	16	12	22	22	8	18	18	22	14	18	8	1236
d__Archaea	k__unclassified_d__Archaea	p__Euryarchaeota	c__Halobacteria	o__Halobacteriales	f__Haloarculaceae	g__Haloarcula	s__Haloarcula_sp._Atlit-47R	8	0	2	4	0	0	0	0	0	0	0	2	0	0	0	0	0	0	2	0	6	2	4	2	4	2	0	0	14	2	0	2	0	0	0	0	56
d__Archaea	k__unclassified_d__Archaea	p__Euryarchaeota	c__Halobacteria	o__Halobacteriales	f__Haloarculaceae	g__Haloarcula	s__Haloarcula_sp._Atlit-7R	12	42	10	2	12	6	6	2	6	4	10	16	46	72	52	28	6	20	10	20	22	40	6	6	36	26	22	8	22	34	32	12	28	28	14	24	742
d__Archaea	k__unclassified_d__Archaea	p__Euryarchaeota	c__Halobacteria	o__Halobacteriales	f__Haloarculaceae	g__Haloarcula	s__Haloarcula_sp._CBA1115	2	2	0	18	8	18	20	14	12	24	14	12	10	20	8	0	0	8	2	0	0	2	2	2	0	0	0	0	0	0	0	0	0	0	0	2	200
d__Archaea	k__unclassified_d__Archaea	p__Euryarchaeota	c__Halobacteria	o__Halobacteriales	f__Haloarculaceae	g__Haloarcula	s__Haloarcula_sp._CBA1122	16	2	2	0	0	0	0	4	2	0	2	0	4	6	2	10	4	4	0	0	2	0	0	0	8	6	0	2	2	0	4	0	0	2	2	4	90
d__Archaea	k__unclassified_d__Archaea	p__Euryarchaeota	c__Halobacteria	o__Halobacteriales	f__Haloarculaceae	g__Haloarcula	s__Haloarcula_sp._CBA1127	26	30	30	10	6	8	10	4	14	38	14	12	0	6	6	12	22	8	10	6	6	10	2	2	20	18	20	8	10	18	12	22	0	16	14	12	462
d__Archaea	k__unclassified_d__Archaea	p__Euryarchaeota	c__Halobacteria	o__Halobacteriales	f__Haloarculaceae	g__Haloarcula	s__Haloarcula_sp._CBA1129	0	0	0	2	6	0	0	0	0	0	0	0	2	2	4	0	0	0	0	0	0	0	0	0	0	0	0	0	0	0	0	0	0	0	0	0	16
d__Archaea	k__unclassified_d__Archaea	p__Euryarchaeota	c__Halobacteria	o__Halobacteriales	f__Haloarculaceae	g__Haloarcula	s__Haloarcula_sp._CBA1131	0	0	6	2	0	2	2	0	4	0	0	2	10	0	0	0	0	2	0	0	0	0	0	0	0	0	0	0	0	0	0	0	4	0	6	2	42
d__Archaea	k__unclassified_d__Archaea	p__Euryarchaeota	c__Halobacteria	o__Halobacteriales	f__Haloarculaceae	g__Haloarcula	s__Haloarcula_sp._JP-L23	10	6	10	16	16	28	30	18	30	34	22	28	8	26	22	4	14	8	14	12	28	14	8	8	10	2	8	10	10	8	6	10	2	12	16	18	526
d__Archaea	k__unclassified_d__Archaea	p__Euryarchaeota	c__Halobacteria	o__Halobacteriales	f__Haloarculaceae	g__Haloarcula	s__Haloarcula_sp._JP-Z28	4	8	0	12	0	2	2	0	10	0	2	2	6	2	4	4	16	0	2	6	8	4	0	0	8	12	2	8	0	22	2	2	0	2	0	0	152
d__Archaea	k__unclassified_d__Archaea	p__Euryarchaeota	c__Halobacteria	o__Halobacteriales	f__Haloarculaceae	g__Haloarcula	s__Haloarcula_sp._K1	0	0	0	2	4	8	2	4	2	2	2	0	4	0	0	0	0	0	0	0	0	0	2	0	0	0	0	0	0	0	0	0	0	0	0	0	32
d__Archaea	k__unclassified_d__Archaea	p__Euryarchaeota	c__Halobacteria	o__Halobacteriales	f__Haloarculaceae	g__Haloarcula	s__Haloarcula_taiwanensis	0	0	0	16	10	10	0	4	4	6	6	2	0	0	0	0	0	0	0	2	0	0	2	4	0	0	0	0	0	0	0	0	0	0	0	0	66
d__Archaea	k__unclassified_d__Archaea	p__Euryarchaeota	c__Halobacteria	o__Halobacteriales	f__Haloarculaceae	g__Haloarcula	s__Haloarcula_vallismortis	0	8	10	20	36	12	22	28	18	30	30	22	0	14	0	4	2	6	2	2	2	8	14	4	12	10	10	4	8	12	14	8	4	14	4	8	402
d__Archaea	k__unclassified_d__Archaea	p__Euryarchaeota	c__Halobacteria	o__Halobacteriales	f__Haloarculaceae	g__Halocatena	s__Halocatena_marina	46	12	22	36	68	52	42	84	52	64	52	62	46	40	28	44	38	26	24	14	32	56	6	32	84	90	88	102	86	110	14	4	16	22	10	8	1612
d__Archaea	k__unclassified_d__Archaea	p__Euryarchaeota	c__Halobacteria	o__Halobacteriales	f__Haloarculaceae	g__Halocatena	s__Halocatena_pleomorpha	46	36	12	74	28	44	26	68	30	60	56	50	42	42	10	36	30	22	34	24	12	22	8	16	52	12	46	42	34	54	16	30	36	20	28	34	1232
d__Archaea	k__unclassified_d__Archaea	p__Euryarchaeota	c__Halobacteria	o__Halobacteriales	f__Haloarculaceae	g__Halocatena	s__Halocatena_salina	14	14	6	24	16	12	22	10	10	22	6	14	6	6	2	8	4	8	10	2	0	2	38	40	6	0	12	14	4	18	6	4	4	2	2	6	374
d__Archaea	k__unclassified_d__Archaea	p__Euryarchaeota	c__Halobacteria	o__Halobacteriales	f__Haloarculaceae	g__Halococcoides	s__Halococcoides_cellulosivorans	12	12	6	10	22	0	10	6	8	10	2	2	118	66	80	58	42	36	2	4	14	4	8	40	6	12	10	20	14	22	22	8	8	8	12	12	726
d__Archaea	k__unclassified_d__Archaea	p__Euryarchaeota	c__Halobacteria	o__Halobacteriales	f__Haloarculaceae	g__Haloglomus	s__Haloglomus_halophilum	16	10	16	6	20	20	30	14	14	10	28	28	70	36	44	32	16	14	24	38	26	64	26	26	46	38	46	44	40	68	24	16	38	12	26	20	1046
d__Archaea	k__unclassified_d__Archaea	p__Euryarchaeota	c__Halobacteria	o__Halobacteriales	f__Haloarculaceae	g__Haloglomus	s__Haloglomus_irregulare	34	4	10	16	16	24	28	12	8	16	8	0	8	8	6	0	0	2	12	16	14	10	30	4	32	12	16	12	32	32	30	32	28	8	8	18	546
d__Archaea	k__unclassified_d__Archaea	p__Euryarchaeota	c__Halobacteria	o__Halobacteriales	f__Haloarculaceae	g__Haloglomus	s__Haloglomus_salinum	0	2	6	54	42	46	54	36	36	56	88	42	26	32	16	46	32	38	4	2	0	6	2	14	28	18	16	18	16	20	18	12	30	8	18	14	896
d__Archaea	k__unclassified_d__Archaea	p__Euryarchaeota	c__Halobacteria	o__Halobacteriales	f__Haloarculaceae	g__Haloglomus	s__Haloglomus_sp._DT116	28	18	26	26	38	44	88	54	62	28	64	42	50	38	52	22	42	38	84	68	134	146	34	50	82	48	60	64	62	84	58	38	24	18	52	32	1898
d__Archaea	k__unclassified_d__Archaea	p__Euryarchaeota	c__Halobacteria	o__Halobacteriales	f__Haloarculaceae	g__Halomarina	s__Halomarina_oriensis	92	64	42	108	120	140	134	84	102	136	128	138	80	64	100	38	32	62	140	120	180	194	60	52	160	142	136	138	162	258	166	128	146	170	142	144	4302
d__Archaea	k__unclassified_d__Archaea	p__Euryarchaeota	c__Halobacteria	o__Halobacteriales	f__Haloarculaceae	g__Halomarina	s__Halomarina_rubra	94	80	56	44	52	50	68	52	48	78	48	40	102	82	86	52	66	54	48	42	42	30	88	28	62	42	60	54	56	58	144	142	142	156	160	146	2652
d__Archaea	k__unclassified_d__Archaea	p__Euryarchaeota	c__Halobacteria	o__Halobacteriales	f__Haloarculaceae	g__Halomarina	s__Halomarina_salina	14	26	22	42	28	50	52	50	32	50	36	44	112	114	74	112	84	64	30	64	26	152	30	66	90	84	80	80	72	128	30	24	38	28	26	40	2094
d__Archaea	k__unclassified_d__Archaea	p__Euryarchaeota	c__Halobacteria	o__Halobacteriales	f__Haloarculaceae	g__Halomarina	s__Halomarina_sp._BCD28	12	22	18	64	60	56	50	64	26	46	106	80	50	68	22	34	16	30	28	16	32	26	26	20	70	52	48	140	90	228	28	26	20	46	26	24	1770
d__Archaea	k__unclassified_d__Archaea	p__Euryarchaeota	c__Halobacteria	o__Halobacteriales	f__Haloarculaceae	g__Halomarina	s__Halomarina_sp._BND7	54	76	44	138	74	106	144	166	126	118	122	90	176	164	142	96	48	82	96	90	136	122	42	60	134	114	174	132	152	180	78	82	88	104	56	70	3876
d__Archaea	k__unclassified_d__Archaea	p__Euryarchaeota	c__Halobacteria	o__Halobacteriales	f__Haloarculaceae	g__Halomarina	s__Halomarina_sp._PSR21	32	48	20	26	46	52	50	78	58	122	116	90	52	30	36	48	36	50	42	20	42	26	34	48	66	72	78	86	54	42	72	44	38	46	46	62	1908
d__Archaea	k__unclassified_d__Archaea	p__Euryarchaeota	c__Halobacteria	o__Halobacteriales	f__Haloarculaceae	g__Halomicroarcula	s__Halomicroarcula_amylolytica	34	18	22	26	10	26	4	20	24	52	64	32	14	6	14	34	12	8	14	12	30	42	10	16	30	24	16	28	36	52	40	22	26	42	56	26	942
d__Archaea	k__unclassified_d__Archaea	p__Euryarchaeota	c__Halobacteria	o__Halobacteriales	f__Haloarculaceae	g__Halomicroarcula	s__Halomicroarcula_laminariae	0	0	4	50	18	12	12	14	10	14	14	14	40	32	24	14	4	6	4	4	0	4	12	2	6	4	8	6	6	14	4	0	2	2	2	4	366
d__Archaea	k__unclassified_d__Archaea	p__Euryarchaeota	c__Halobacteria	o__Halobacteriales	f__Haloarculaceae	g__Halomicroarcula	s__Halomicroarcula_limicola	4	22	22	4	0	4	6	6	8	12	8	8	4	0	12	14	16	20	6	8	12	14	6	4	8	18	20	16	14	22	38	18	34	48	50	30	536
d__Archaea	k__unclassified_d__Archaea	p__Euryarchaeota	c__Halobacteria	o__Halobacteriales	f__Haloarculaceae	g__Halomicroarcula	s__Halomicroarcula_marina	58	28	34	58	46	60	46	52	36	32	34	30	60	84	68	58	54	36	34	54	64	42	22	20	62	44	54	148	74	120	18	42	34	24	32	24	1786
d__Archaea	k__unclassified_d__Archaea	p__Euryarchaeota	c__Halobacteria	o__Halobacteriales	f__Haloarculaceae	g__Halomicroarcula	s__Halomicroarcula_nitratireducens	40	36	22	84	94	84	94	110	44	58	104	86	94	66	66	58	30	34	110	82	84	88	76	28	308	282	334	192	136	250	78	100	82	88	88	110	3720
d__Archaea	k__unclassified_d__Archaea	p__Euryarchaeota	c__Halobacteria	o__Halobacteriales	f__Haloarculaceae	g__Halomicroarcula	s__Halomicroarcula_pellucida	0	0	0	36	36	48	40	48	46	78	54	36	48	26	26	6	8	12	4	0	10	12	8	40	10	12	22	8	14	20	82	70	80	60	52	60	1112
d__Archaea	k__unclassified_d__Archaea	p__Euryarchaeota	c__Halobacteria	o__Halobacteriales	f__Haloarculaceae	g__Halomicroarcula	s__Halomicroarcula_rubra	12	12	4	64	80	106	98	88	86	92	64	54	60	32	36	20	8	42	56	42	44	44	30	34	172	194	126	82	96	144	40	54	42	36	60	32	2286
d__Archaea	k__unclassified_d__Archaea	p__Euryarchaeota	c__Halobacteria	o__Halobacteriales	f__Haloarculaceae	g__Halomicroarcula	s__Halomicroarcula_salinisoli	6	12	4	32	14	12	30	14	22	16	22	8	4	10	8	2	8	0	4	18	10	8	6	4	18	14	18	96	10	24	0	0	0	4	2	0	460
d__Archaea	k__unclassified_d__Archaea	p__Euryarchaeota	c__Halobacteria	o__Halobacteriales	f__Haloarculaceae	g__Halomicroarcula	s__Halomicroarcula_sp.	14	10	8	2	8	6	4	24	2	6	18	0	0	0	0	0	8	2	2	0	0	6	0	0	0	0	0	2	2	0	0	0	0	0	0	0	124
d__Archaea	k__unclassified_d__Archaea	p__Euryarchaeota	c__Halobacteria	o__Halobacteriales	f__Haloarculaceae	g__Halomicroarcula	s__Halomicroarcula_sp._DFY41	2	20	4	10	14	24	28	70	46	28	22	44	8	8	6	0	2	2	0	0	8	0	4	2	6	2	0	30	20	12	4	2	8	12	12	6	466
d__Archaea	k__unclassified_d__Archaea	p__Euryarchaeota	c__Halobacteria	o__Halobacteriales	f__Haloarculaceae	g__Halomicroarcula	s__Halomicroarcula_sp._FL173	18	22	58	4	14	18	16	16	14	24	14	20	12	8	12	2	4	2	6	2	0	4	2	0	4	8	6	8	2	10	0	0	4	6	0	0	340
d__Archaea	k__unclassified_d__Archaea	p__Euryarchaeota	c__Halobacteria	o__Halobacteriales	f__Haloarculaceae	g__Halomicroarcula	s__Halomicroarcula_sp._GDY20	34	32	38	22	12	26	18	42	24	26	18	16	8	24	20	8	8	14	6	12	12	20	14	10	40	24	26	54	48	38	42	30	34	56	54	70	980
d__Archaea	k__unclassified_d__Archaea	p__Euryarchaeota	c__Halobacteria	o__Halobacteriales	f__Haloarculaceae	g__Halomicroarcula	s__Halomicroarcula_sp._SHR3	0	0	0	2	0	0	0	6	0	2	2	4	0	0	0	0	0	0	2	2	14	2	8	0	2	2	4	24	16	14	0	0	0	0	0	0	106
d__Archaea	k__unclassified_d__Archaea	p__Euryarchaeota	c__Halobacteria	o__Halobacteriales	f__Haloarculaceae	g__Halomicroarcula	s__Halomicroarcula_sp._SYNS111	2	2	0	30	14	18	26	20	30	8	18	26	8	4	2	24	2	12	16	14	30	12	8	6	12	18	12	8	30	40	4	6	2	2	4	6	476
d__Archaea	k__unclassified_d__Archaea	p__Euryarchaeota	c__Halobacteria	o__Halobacteriales	f__Haloarculaceae	g__Halomicroarcula	s__Halomicroarcula_sp._XH51	40	36	44	68	94	112	114	124	126	92	88	98	36	24	18	14	2	24	16	4	8	24	12	6	114	104	102	112	74	146	12	10	8	20	18	2	1946
d__Archaea	k__unclassified_d__Archaea	p__Euryarchaeota	c__Halobacteria	o__Halobacteriales	f__Haloarculaceae	g__Halomicroarcula	s__Halomicroarcula_sp._YJ-61-S	28	20	26	122	128	98	120	126	128	152	168	132	136	112	130	84	118	110	14	34	32	26	18	20	36	22	16	38	28	36	34	66	48	70	48	62	2586
d__Archaea	k__unclassified_d__Archaea	p__Euryarchaeota	c__Halobacteria	o__Halobacteriales	f__Haloarculaceae	g__Halomicroarcula	s__Halomicroarcula_sp._ZS-22-S1	394	196	296	236	206	296	302	308	386	300	314	318	318	256	148	134	96	194	190	166	212	184	72	80	598	482	504	488	366	554	212	226	226	206	250	240	9954
d__Archaea	k__unclassified_d__Archaea	p__Euryarchaeota	c__Halobacteria	o__Halobacteriales	f__Haloarculaceae	g__Halomicrobium	s__Halomicrobium_katesii	52	18	22	4	10	12	8	8	8	26	24	16	10	26	8	22	10	8	10	12	12	30	12	18	4	2	2	4	4	6	18	22	6	16	12	12	494
d__Archaea	k__unclassified_d__Archaea	p__Euryarchaeota	c__Halobacteria	o__Halobacteriales	f__Haloarculaceae	g__Halomicrobium	s__Halomicrobium_mukohataei	12	24	8	4	0	2	8	4	2	4	0	14	0	2	0	2	0	0	0	0	4	2	0	0	4	2	16	6	4	2	0	0	0	0	0	0	126
d__Archaea	k__unclassified_d__Archaea	p__Euryarchaeota	c__Halobacteria	o__Halobacteriales	f__Haloarculaceae	g__Halomicrobium	s__Halomicrobium_salinisoli	170	82	116	142	138	214	198	218	220	156	192	206	52	28	24	42	12	84	18	16	6	12	110	18	18	30	18	44	24	64	12	18	14	12	22	24	2774
d__Archaea	k__unclassified_d__Archaea	p__Euryarchaeota	c__Halobacteria	o__Halobacteriales	f__Haloarculaceae	g__Halomicrobium	s__Halomicrobium_sp.	16	2	12	10	2	0	6	12	10	2	0	0	12	10	6	6	6	2	2	2	6	2	8	0	2	2	0	2	6	6	4	2	0	2	2	0	162
d__Archaea	k__unclassified_d__Archaea	p__Euryarchaeota	c__Halobacteria	o__Halobacteriales	f__Haloarculaceae	g__Halomicrobium	s__Halomicrobium_sp._IBSBa	0	0	0	12	6	10	12	10	4	24	36	16	2	4	0	2	6	4	0	0	0	0	0	12	0	0	0	0	0	2	4	10	6	8	16	14	220
d__Archaea	k__unclassified_d__Archaea	p__Euryarchaeota	c__Halobacteria	o__Halobacteriales	f__Haloarculaceae	g__Halomicrobium	s__Halomicrobium_sp._LC1Hm	16	10	8	18	30	16	26	24	12	26	40	40	10	12	4	14	2	6	2	2	2	4	2	6	2	4	4	8	12	14	2	2	4	4	2	0	390
d__Archaea	k__unclassified_d__Archaea	p__Euryarchaeota	c__Halobacteria	o__Halobacteriales	f__Haloarculaceae	g__Halomicrobium	s__Halomicrobium_urmianum	18	36	12	24	42	36	36	56	18	32	38	34	80	74	44	48	48	38	28	20	64	32	22	56	22	28	42	46	22	42	54	42	40	46	50	56	1426
d__Archaea	k__unclassified_d__Archaea	p__Euryarchaeota	c__Halobacteria	o__Halobacteriales	f__Haloarculaceae	g__Halomicrobium	s__Halomicrobium_zhouii	50	48	26	20	32	38	42	50	22	48	28	48	46	42	22	20	22	28	8	8	16	30	8	2	34	16	38	8	14	24	58	62	74	32	26	64	1154
d__Archaea	k__unclassified_d__Archaea	p__Euryarchaeota	c__Halobacteria	o__Halobacteriales	f__Haloarculaceae	g__Halorarius	s__Halorarius_halobius	20	26	18	118	96	148	96	142	172	148	142	146	88	72	52	34	18	50	8	12	22	32	24	22	52	70	70	52	58	44	60	54	76	86	90	48	2466
d__Archaea	k__unclassified_d__Archaea	p__Euryarchaeota	c__Halobacteria	o__Halobacteriales	f__Haloarculaceae	g__Halorarius	s__Halorarius_litoreus	38	28	36	158	122	124	164	198	128	128	128	132	142	104	106	74	38	74	48	70	44	30	52	12	130	100	82	88	142	132	68	74	48	36	70	48	3196
d__Archaea	k__unclassified_d__Archaea	p__Euryarchaeota	c__Halobacteria	o__Halobacteriales	f__Haloarculaceae	g__Halorhabdus	s__Halorhabdus_amylolytica	0	2	0	4	10	12	6	6	8	20	8	12	2	8	10	6	0	18	4	8	2	42	12	10	10	2	2	0	2	6	4	0	8	4	0	2	250
d__Archaea	k__unclassified_d__Archaea	p__Euryarchaeota	c__Halobacteria	o__Halobacteriales	f__Haloarculaceae	g__Halorhabdus	s__Halorhabdus_rudnickae	26	10	6	12	2	10	8	0	12	2	16	4	2	12	20	14	10	12	4	30	28	6	4	4	8	8	2	4	8	10	10	4	8	10	4	4	334
d__Archaea	k__unclassified_d__Archaea	p__Euryarchaeota	c__Halobacteria	o__Halobacteriales	f__Haloarculaceae	g__Halorhabdus	s__Halorhabdus_salina	6	12	0	10	10	14	2	12	10	2	16	0	38	10	2	4	4	4	52	46	54	50	20	16	182	132	162	110	132	166	54	44	28	58	54	38	1554
d__Archaea	k__unclassified_d__Archaea	p__Euryarchaeota	c__Halobacteria	o__Halobacteriales	f__Haloarculaceae	g__Halorhabdus	s__Halorhabdus_sp.	0	0	0	0	0	6	4	0	0	0	0	0	0	0	0	0	0	0	0	2	2	0	0	4	6	6	8	12	4	8	0	0	0	0	0	0	62
d__Archaea	k__unclassified_d__Archaea	p__Euryarchaeota	c__Halobacteria	o__Halobacteriales	f__Haloarculaceae	g__Halorhabdus	s__Halorhabdus_sp._BNX81	28	30	20	4	14	12	8	28	4	10	34	12	12	4	10	2	6	0	12	12	8	2	10	0	38	2	12	58	14	46	12	12	14	4	10	18	522
d__Archaea	k__unclassified_d__Archaea	p__Euryarchaeota	c__Halobacteria	o__Halobacteriales	f__Haloarculaceae	g__Halorhabdus	s__Halorhabdus_sp._CBA1104	2	8	0	0	2	4	4	6	6	12	6	12	2	8	14	12	44	8	2	2	2	0	0	0	10	2	0	14	4	0	8	4	12	8	6	0	224
d__Archaea	k__unclassified_d__Archaea	p__Euryarchaeota	c__Halobacteria	o__Halobacteriales	f__Haloarculaceae	g__Halorhabdus	s__Halorhabdus_sp._CUG00001	4	0	0	0	0	0	2	12	4	6	4	0	2	10	4	8	28	8	0	0	0	0	0	2	2	0	0	0	6	4	8	2	2	10	4	6	138
d__Archaea	k__unclassified_d__Archaea	p__Euryarchaeota	c__Halobacteria	o__Halobacteriales	f__Haloarculaceae	g__Halorhabdus	s__Halorhabdus_sp._SVX81	22	14	24	12	14	0	2	14	0	8	0	2	4	16	2	0	0	0	0	0	12	0	8	2	12	12	18	36	34	26	16	6	14	12	34	10	386
d__Archaea	k__unclassified_d__Archaea	p__Euryarchaeota	c__Halobacteria	o__Halobacteriales	f__Haloarculaceae	g__Halorhabdus	s__Halorhabdus_tiamatea	14	18	10	8	2	6	6	14	8	10	6	2	52	22	18	8	18	10	6	10	0	24	12	2	22	10	22	22	24	32	22	24	26	38	60	26	614
d__Archaea	k__unclassified_d__Archaea	p__Euryarchaeota	c__Halobacteria	o__Halobacteriales	f__Haloarculaceae	g__Halorhabdus	s__Halorhabdus_utahensis	0	2	4	0	2	2	6	0	2	12	14	4	14	4	4	4	2	0	2	10	14	16	16	2	20	20	6	34	30	46	4	0	4	0	0	6	306
d__Archaea	k__unclassified_d__Archaea	p__Euryarchaeota	c__Halobacteria	o__Halobacteriales	f__Haloarculaceae	g__Halorientalis	s__Halorientalis_brevis	26	18	58	66	34	36	42	48	42	64	42	60	152	126	104	124	94	76	22	22	26	18	24	10	44	60	28	36	40	56	50	46	42	70	76	42	1924
d__Archaea	k__unclassified_d__Archaea	p__Euryarchaeota	c__Halobacteria	o__Halobacteriales	f__Haloarculaceae	g__Halorientalis	s__Halorientalis_litorea	28	34	26	36	20	20	20	46	36	12	2	30	30	18	10	14	2	30	16	6	6	4	8	8	10	2	8	4	6	2	0	2	4	10	14	12	536
d__Archaea	k__unclassified_d__Archaea	p__Euryarchaeota	c__Halobacteria	o__Halobacteriales	f__Haloarculaceae	g__Halorientalis	s__Halorientalis_marina	198	104	162	70	72	46	54	66	50	48	64	54	100	62	60	38	64	60	22	2	16	20	58	22	18	16	30	16	18	32	54	52	36	58	46	44	1932
d__Archaea	k__unclassified_d__Archaea	p__Euryarchaeota	c__Halobacteria	o__Halobacteriales	f__Haloarculaceae	g__Halorientalis	s__Halorientalis_pallida	6	10	24	46	28	36	44	36	22	28	76	42	26	24	26	12	18	24	20	24	44	20	20	32	10	20	14	38	10	38	4	2	4	4	10	2	844
d__Archaea	k__unclassified_d__Archaea	p__Euryarchaeota	c__Halobacteria	o__Halobacteriales	f__Haloarculaceae	g__Halorientalis	s__Halorientalis_persicus	12	6	6	16	24	38	24	20	22	24	24	34	4	18	6	0	6	4	52	22	34	12	8	28	36	14	14	60	16	66	28	46	20	12	26	20	802
d__Archaea	k__unclassified_d__Archaea	p__Euryarchaeota	c__Halobacteria	o__Halobacteriales	f__Haloarculaceae	g__Halorientalis	s__Halorientalis_regularis	20	8	8	34	24	36	24	40	30	28	30	36	36	22	26	30	26	26	8	4	14	52	22	24	12	6	2	12	16	20	6	6	14	8	18	30	758
d__Archaea	k__unclassified_d__Archaea	p__Euryarchaeota	c__Halobacteria	o__Halobacteriales	f__Haloarculaceae	g__Halorientalis	s__Halorientalis_salina	12	22	4	52	48	62	56	60	90	68	42	48	90	78	52	80	82	44	60	46	78	24	20	20	84	104	100	66	60	80	72	56	62	84	82	44	2132
d__Archaea	k__unclassified_d__Archaea	p__Euryarchaeota	c__Halobacteria	o__Halobacteriales	f__Haloarculaceae	g__Halorientalis	s__Halorientalis_sp.	4	2	2	10	12	18	14	26	4	22	46	20	18	12	6	2	0	8	2	8	4	8	2	4	6	2	0	20	8	18	16	18	4	4	6	12	368
d__Archaea	k__unclassified_d__Archaea	p__Euryarchaeota	c__Halobacteria	o__Halobacteriales	f__Haloarculaceae	g__Halorientalis	s__Halorientalis_sp._IM1011	10	4	2	20	20	12	28	32	20	22	26	20	14	24	4	18	18	12	28	30	34	50	22	50	44	54	20	76	58	94	46	36	78	68	58	58	1210
d__Archaea	k__unclassified_d__Archaea	p__Euryarchaeota	c__Halobacteria	o__Halobacteriales	f__Haloarculaceae	g__Halosegnis	s__Halosegnis_longus	0	2	2	14	10	34	22	8	22	44	64	38	8	8	4	2	0	16	10	4	2	24	22	4	8	0	0	2	0	0	0	0	0	0	0	0	374
d__Archaea	k__unclassified_d__Archaea	p__Euryarchaeota	c__Halobacteria	o__Halobacteriales	f__Haloarculaceae	g__Halosegnis	s__Halosegnis_rubeus	0	0	0	0	0	0	0	0	0	0	0	0	0	0	0	0	6	0	10	0	6	6	2	2	2	0	0	2	0	0	0	2	0	0	0	0	38
d__Archaea	k__unclassified_d__Archaea	p__Euryarchaeota	c__Halobacteria	o__Halobacteriales	f__Haloarculaceae	g__Halosegnis	s__Halosegnis_sp._DT85	24	54	28	132	98	98	102	70	116	80	84	98	230	100	62	86	76	54	38	66	46	122	36	46	84	84	98	42	80	82	132	122	126	146	126	100	3168
d__Archaea	k__unclassified_d__Archaea	p__Euryarchaeota	c__Halobacteria	o__Halobacteriales	f__Haloarculaceae	g__Halosimplex	s__Halosimplex_carlsbadense	2	0	2	22	36	18	28	22	36	50	34	44	46	60	48	34	40	20	34	24	30	8	16	22	24	44	32	34	38	38	40	46	36	48	82	32	1170
d__Archaea	k__unclassified_d__Archaea	p__Euryarchaeota	c__Halobacteria	o__Halobacteriales	f__Haloarculaceae	g__Halosimplex	s__Halosimplex_halophilum	14	24	12	32	32	42	30	36	52	42	54	56	16	12	10	28	22	18	12	4	2	0	2	2	0	6	0	20	0	14	26	38	28	30	54	14	784
d__Archaea	k__unclassified_d__Archaea	p__Euryarchaeota	c__Halobacteria	o__Halobacteriales	f__Haloarculaceae	g__Halosimplex	s__Halosimplex_litoreum	6	6	16	20	14	36	26	62	52	38	50	34	22	12	4	16	6	8	2	8	8	16	8	4	28	36	32	8	10	8	18	2	10	10	8	10	654
d__Archaea	k__unclassified_d__Archaea	p__Euryarchaeota	c__Halobacteria	o__Halobacteriales	f__Haloarculaceae	g__Halosimplex	s__Halosimplex_pelagicum	18	12	14	20	32	30	20	16	28	32	18	16	14	42	38	14	42	22	38	18	52	18	34	10	26	22	24	14	14	22	4	12	24	6	14	18	798
d__Archaea	k__unclassified_d__Archaea	p__Euryarchaeota	c__Halobacteria	o__Halobacteriales	f__Haloarculaceae	g__Halosimplex	s__Halosimplex_rubrum	34	24	26	26	10	16	10	12	14	24	32	22	12	12	6	4	8	4	0	4	10	2	18	16	10	8	2	0	2	14	8	4	2	4	8	2	410
d__Archaea	k__unclassified_d__Archaea	p__Euryarchaeota	c__Halobacteria	o__Halobacteriales	f__Haloarculaceae	g__Halosimplex	s__Halosimplex_salinum	14	8	34	36	56	64	76	70	56	68	78	62	56	40	14	12	6	22	42	28	40	30	22	24	52	58	62	38	66	58	16	28	20	10	26	30	1422
d__Archaea	k__unclassified_d__Archaea	p__Euryarchaeota	c__Halobacteria	o__Halobacteriales	f__Haloarculaceae	g__Halosimplex	s__Halosimplex_sp._XZYJT29	18	18	12	62	52	76	68	62	72	58	56	58	24	42	40	20	22	46	58	44	84	46	30	34	66	40	54	50	48	66	24	24	32	38	58	30	1632
d__Archaea	k__unclassified_d__Archaea	p__Euryarchaeota	c__Halobacteria	o__Halobacteriales	f__Haloarculaceae	g__Halovenus	s__Halovenus_aranensis	0	0	2	20	20	12	14	4	10	8	8	0	2	0	8	8	0	2	6	0	4	8	2	6	2	12	2	26	18	4	4	2	2	2	6	2	226
d__Archaea	k__unclassified_d__Archaea	p__Euryarchaeota	c__Halobacteria	o__Halobacteriales	f__Haloarculaceae	g__Halovenus	s__Halovenus_carboxidivorans	16	4	8	2	0	4	2	8	0	2	6	2	2	4	2	2	0	0	0	0	0	2	0	0	2	0	4	50	18	28	8	10	14	10	12	2	224
d__Archaea	k__unclassified_d__Archaea	p__Euryarchaeota	c__Halobacteria	o__Halobacteriales	f__Haloarculaceae	g__Halovenus	s__Halovenus_rubra	4	6	8	0	2	6	4	12	4	2	0	2	8	4	2	2	2	8	12	16	20	4	0	0	26	14	8	22	20	18	14	18	22	8	24	10	332
d__Archaea	k__unclassified_d__Archaea	p__Euryarchaeota	c__Halobacteria	o__Halobacteriales	f__Haloarculaceae	g__Halovenus	s__Halovenus_salina	8	0	2	20	8	16	26	20	22	8	10	8	0	16	2	4	0	2	0	2	2	2	8	0	0	0	2	0	4	4	4	4	10	4	8	0	226
d__Archaea	k__unclassified_d__Archaea	p__Euryarchaeota	c__Halobacteria	o__Halobacteriales	f__Haloarculaceae	g__Halovenus	s__Halovenus_sp.	0	22	0	12	2	14	6	6	20	24	12	6	2	12	2	0	10	8	10	24	14	14	6	28	26	12	16	4	26	26	2	4	2	0	2	6	380
d__Archaea	k__unclassified_d__Archaea	p__Euryarchaeota	c__Halobacteria	o__Halobacteriales	f__Haloarculaceae	g__Natronomonas	s__Natronomonas_aquatica	16	16	24	16	14	16	14	34	24	12	18	22	2	6	16	2	0	2	30	12	16	8	0	6	12	12	10	14	4	18	8	4	10	16	6	18	458
d__Archaea	k__unclassified_d__Archaea	p__Euryarchaeota	c__Halobacteria	o__Halobacteriales	f__Haloarculaceae	g__Natronomonas	s__Natronomonas_gomsonensis	12	12	2	52	48	64	42	36	100	54	58	86	54	20	28	18	14	6	22	40	60	74	38	16	70	66	58	36	62	70	72	62	34	62	42	30	1620
d__Archaea	k__unclassified_d__Archaea	p__Euryarchaeota	c__Halobacteria	o__Halobacteriales	f__Haloarculaceae	g__Natronomonas	s__Natronomonas_halophila	4	4	2	34	16	10	24	24	22	4	14	6	28	38	34	8	12	16	22	10	14	18	14	16	6	16	4	4	12	18	30	26	48	34	16	32	640
d__Archaea	k__unclassified_d__Archaea	p__Euryarchaeota	c__Halobacteria	o__Halobacteriales	f__Haloarculaceae	g__Natronomonas	s__Natronomonas_marina	68	34	36	60	74	52	78	82	60	50	82	46	148	108	76	32	20	34	28	10	26	14	18	24	66	56	76	80	56	100	28	40	46	52	34	44	1938
d__Archaea	k__unclassified_d__Archaea	p__Euryarchaeota	c__Halobacteria	o__Halobacteriales	f__Haloarculaceae	g__Natronomonas	s__Natronomonas_moolapensis	2	6	2	38	36	26	34	26	20	36	48	32	8	8	6	8	0	12	10	6	26	10	6	14	22	8	24	12	14	20	6	4	0	10	12	8	560
d__Archaea	k__unclassified_d__Archaea	p__Euryarchaeota	c__Halobacteria	o__Halobacteriales	f__Haloarculaceae	g__Natronomonas	s__Natronomonas_pharaonis	36	24	22	8	6	0	8	2	6	0	2	0	6	10	6	0	0	0	2	0	2	8	4	0	50	54	58	36	34	68	18	32	20	24	6	12	564
d__Archaea	k__unclassified_d__Archaea	p__Euryarchaeota	c__Halobacteria	o__Halobacteriales	f__Haloarculaceae	g__Natronomonas	s__Natronomonas_salina	18	28	44	44	32	40	24	46	54	58	48	40	30	32	22	64	40	34	32	22	18	64	40	38	32	42	34	24	46	40	104	114	104	106	116	110	1784
d__Archaea	k__unclassified_d__Archaea	p__Euryarchaeota	c__Halobacteria	o__Halobacteriales	f__Haloarculaceae	g__Natronomonas	s__Natronomonas_salsuginis	4	0	4	58	68	100	84	68	72	74	78	90	74	34	32	26	10	32	38	16	28	2	30	2	28	4	4	2	6	8	10	8	4	8	0	12	1118
d__Archaea	k__unclassified_d__Archaea	p__Euryarchaeota	c__Halobacteria	o__Halobacteriales	f__Haloarculaceae	g__Natronomonas	s__Natronomonas_sp.	0	4	0	8	8	10	12	10	22	18	34	16	6	8	4	0	0	4	2	0	12	2	0	0	26	20	14	0	2	28	6	0	0	0	2	2	280
d__Archaea	k__unclassified_d__Archaea	p__Euryarchaeota	c__Halobacteria	o__Halobacteriales	f__Haloarculaceae	g__Natronomonas	s__Natronomonas_sp._CBA1123	16	30	12	14	24	20	10	20	24	4	10	14	58	40	54	54	62	26	22	34	46	62	58	76	80	52	90	56	86	94	18	22	16	26	24	24	1378
d__Archaea	k__unclassified_d__Archaea	p__Euryarchaeota	c__Halobacteria	o__Halobacteriales	f__Haloarculaceae	g__Natronomonas	s__Natronomonas_sp._LN261	0	0	0	6	8	10	2	6	6	0	2	0	2	8	0	8	0	8	16	22	6	46	20	8	12	8	8	20	4	10	2	4	2	0	0	2	256
d__Archaea	k__unclassified_d__Archaea	p__Euryarchaeota	c__Halobacteria	o__Halobacteriales	f__Haloarculaceae	g__Salinibaculum	s__Salinibaculum_sp._KK48	14	4	6	2	12	2	14	2	10	6	0	0	4	4	0	2	6	0	2	2	2	6	2	10	4	4	6	0	2	10	12	24	14	22	20	32	262
d__Archaea	k__unclassified_d__Archaea	p__Euryarchaeota	c__Halobacteria	o__Halobacteriales	f__Haloarculaceae	g__Salinirubellus	s__Salinirubellus_salinus	164	100	112	386	334	396	486	528	424	632	536	528	364	246	246	170	124	206	118	130	184	108	126	94	346	322	332	304	296	366	128	102	138	108	132	108	9424
d__Archaea	k__unclassified_d__Archaea	p__Euryarchaeota	c__Halobacteria	o__Halobacteriales	f__Haloarculaceae	g__Salinirussus	s__Salinirussus_salinus	30	16	36	48	38	44	48	58	56	44	60	32	218	134	140	78	48	56	16	24	10	4	8	16	20	18	10	14	24	24	68	78	110	96	90	66	1880
d__Archaea	k__unclassified_d__Archaea	p__Euryarchaeota	c__Halobacteria	o__Halobacteriales	f__Haloarculaceae	g__unclassified_f__Haloarculaceae	s__Haloarculaceae_archaeon_H-GB1-1	68	68	44	40	46	50	58	38	60	42	62	42	112	122	94	162	68	92	40	18	34	34	30	48	74	92	90	94	80	102	52	72	62	84	62	76	2412
d__Archaea	k__unclassified_d__Archaea	p__Euryarchaeota	c__Halobacteria	o__Halobacteriales	f__Halobacteriaceae	g__Halanaeroarchaeum	s__Halanaeroarchaeum_sp._HSR-CO	32	56	62	42	46	42	20	36	14	20	28	48	46	26	12	0	0	0	6	10	16	2	8	10	22	22	14	24	6	6	22	12	6	12	22	10	760
d__Archaea	k__unclassified_d__Archaea	p__Euryarchaeota	c__Halobacteria	o__Halobacteriales	f__Halobacteriaceae	g__Halanaeroarchaeum	s__Halanaeroarchaeum_sulfurireducens	0	4	0	20	28	28	44	30	24	28	36	28	6	10	16	2	4	8	8	4	4	2	0	6	0	0	10	2	10	22	8	8	2	2	8	14	426
d__Archaea	k__unclassified_d__Archaea	p__Euryarchaeota	c__Halobacteria	o__Halobacteriales	f__Halobacteriaceae	g__Halarchaeum	s__Halarchaeum_acidiphilum	10	8	14	36	14	20	12	12	12	30	12	6	4	22	12	18	18	6	10	4	10	20	6	4	6	0	2	0	8	2	6	4	0	0	4	16	368
d__Archaea	k__unclassified_d__Archaea	p__Euryarchaeota	c__Halobacteria	o__Halobacteriales	f__Halobacteriaceae	g__Halarchaeum	s__Halarchaeum_grantii	0	0	0	4	2	4	2	2	2	12	8	18	2	0	2	0	4	0	6	0	6	0	0	0	2	2	0	0	0	4	0	0	0	2	0	2	86
d__Archaea	k__unclassified_d__Archaea	p__Euryarchaeota	c__Halobacteria	o__Halobacteriales	f__Halobacteriaceae	g__Halarchaeum	s__Halarchaeum_nitratireducens	2	4	6	0	0	0	2	4	6	0	2	8	22	28	8	8	2	0	14	6	6	2	0	0	10	12	6	0	0	0	44	36	14	34	34	36	356
d__Archaea	k__unclassified_d__Archaea	p__Euryarchaeota	c__Halobacteria	o__Halobacteriales	f__Halobacteriaceae	g__Halarchaeum	s__Halarchaeum_rubridurum	2	8	2	8	2	6	6	8	0	4	10	2	12	20	10	4	18	0	2	0	0	0	0	0	0	2	0	2	0	0	4	10	10	12	4	16	184
d__Archaea	k__unclassified_d__Archaea	p__Euryarchaeota	c__Halobacteria	o__Halobacteriales	f__Halobacteriaceae	g__Halarchaeum	s__Halarchaeum_solikamskense	0	2	2	4	2	0	6	8	6	2	4	6	4	2	0	0	0	2	2	0	0	0	0	2	6	0	0	38	8	22	2	2	0	0	0	0	132
d__Archaea	k__unclassified_d__Archaea	p__Euryarchaeota	c__Halobacteria	o__Halobacteriales	f__Halobacteriaceae	g__Halarchaeum	s__Halarchaeum_sp.	0	0	0	0	0	2	0	0	6	0	10	18	0	0	0	0	0	0	0	0	0	0	0	0	0	0	0	0	0	0	0	0	0	0	0	0	36
d__Archaea	k__unclassified_d__Archaea	p__Euryarchaeota	c__Halobacteria	o__Halobacteriales	f__Halobacteriaceae	g__Halarchaeum	s__Halarchaeum_sp._CBA1220	6	2	2	14	26	10	16	26	12	50	26	28	4	12	8	10	12	16	14	12	4	6	0	6	0	6	8	30	14	18	12	4	0	2	0	2	418
d__Archaea	k__unclassified_d__Archaea	p__Euryarchaeota	c__Halobacteria	o__Halobacteriales	f__Halobacteriaceae	g__Halobacterium	s__Halobacterium_bonnevillei	16	6	12	74	52	48	56	78	44	48	58	66	96	54	38	46	32	20	8	12	26	22	4	10	6	10	0	2	12	6	2	12	6	6	12	6	1006
d__Archaea	k__unclassified_d__Archaea	p__Euryarchaeota	c__Halobacteria	o__Halobacteriales	f__Halobacteriaceae	g__Halobacterium	s__Halobacterium_hubeiense	0	10	0	6	10	4	12	10	6	0	0	6	6	8	0	0	0	0	14	20	12	10	12	12	24	38	16	34	34	46	34	22	46	38	26	28	544
d__Archaea	k__unclassified_d__Archaea	p__Euryarchaeota	c__Halobacteria	o__Halobacteriales	f__Halobacteriaceae	g__Halobacterium	s__Halobacterium_jilantaiense	16	6	14	6	20	10	10	6	12	6	2	6	10	8	12	12	2	0	4	14	8	32	10	8	16	24	22	18	16	26	44	46	60	32	48	64	650
d__Archaea	k__unclassified_d__Archaea	p__Euryarchaeota	c__Halobacteria	o__Halobacteriales	f__Halobacteriaceae	g__Halobacterium	s__Halobacterium_litoreum	18	10	10	8	6	14	26	32	16	24	22	30	22	20	16	14	8	6	6	0	4	2	4	2	8	8	6	0	4	2	4	2	2	0	0	2	358
d__Archaea	k__unclassified_d__Archaea	p__Euryarchaeota	c__Halobacteria	o__Halobacteriales	f__Halobacteriaceae	g__Halobacterium	s__Halobacterium_noricense	44	4	24	0	2	2	4	6	0	12	0	0	8	6	2	18	8	10	0	0	0	0	6	0	2	0	0	2	8	0	0	0	0	0	0	0	168
d__Archaea	k__unclassified_d__Archaea	p__Euryarchaeota	c__Halobacteria	o__Halobacteriales	f__Halobacteriaceae	g__Halobacterium	s__Halobacterium_rubrum	0	0	0	0	0	0	0	0	0	0	0	0	8	12	0	2	2	0	0	0	0	0	0	0	0	0	0	0	0	0	0	0	0	0	0	0	24
d__Archaea	k__unclassified_d__Archaea	p__Euryarchaeota	c__Halobacteria	o__Halobacteriales	f__Halobacteriaceae	g__Halobacterium	s__Halobacterium_salinarum	32	10	18	26	20	28	22	22	12	26	30	24	20	8	16	8	12	12	36	18	46	10	32	6	24	28	26	36	24	16	20	18	14	22	14	26	762
d__Archaea	k__unclassified_d__Archaea	p__Euryarchaeota	c__Halobacteria	o__Halobacteriales	f__Halobacteriaceae	g__Halobacterium	s__Halobacterium_sp.	24	4	26	14	14	26	26	8	14	36	14	12	56	24	30	4	0	22	6	6	8	14	10	36	8	18	30	24	16	22	10	14	12	26	18	20	652
d__Archaea	k__unclassified_d__Archaea	p__Euryarchaeota	c__Halobacteria	o__Halobacteriales	f__Halobacteriaceae	g__Halobacterium	s__Halobacterium_sp._BOL4-2	0	0	0	0	0	0	2	2	0	2	4	4	2	16	0	0	0	0	6	4	10	4	6	0	12	12	2	6	2	2	0	0	4	8	0	0	110
d__Archaea	k__unclassified_d__Archaea	p__Euryarchaeota	c__Halobacteria	o__Halobacteriales	f__Halobacteriaceae	g__Halobacterium	s__Halobacterium_sp._CBA1126	10	6	10	20	4	14	14	2	20	10	12	6	0	2	0	0	0	2	0	0	0	0	0	0	0	0	0	0	0	0	0	0	0	0	0	0	132
d__Archaea	k__unclassified_d__Archaea	p__Euryarchaeota	c__Halobacteria	o__Halobacteriales	f__Halobacteriaceae	g__Halobacterium	s__Halobacterium_sp._CBA1132	0	0	0	2	0	0	0	0	0	0	0	0	2	0	0	0	0	0	0	0	0	0	0	2	0	0	0	0	0	0	0	0	0	0	0	0	6
d__Archaea	k__unclassified_d__Archaea	p__Euryarchaeota	c__Halobacteria	o__Halobacteriales	f__Halobacteriaceae	g__Halobacterium	s__Halobacterium_sp._DL1	4	2	0	22	18	22	20	24	26	22	24	22	26	24	42	24	10	28	12	2	8	4	14	2	4	22	2	26	12	42	6	2	2	8	8	8	544
d__Archaea	k__unclassified_d__Archaea	p__Euryarchaeota	c__Halobacteria	o__Halobacteriales	f__Halobacteriaceae	g__Halobacterium	s__Halobacterium_sp._KA-4	2	4	2	6	0	12	14	16	22	0	10	4	2	4	2	0	0	6	2	2	2	4	10	2	2	2	0	4	2	4	10	2	6	8	4	2	174
d__Archaea	k__unclassified_d__Archaea	p__Euryarchaeota	c__Halobacteria	o__Halobacteriales	f__Halobacteriaceae	g__Halobacterium	s__Halobacterium_sp._KA-6	6	2	0	20	14	8	8	10	20	32	10	16	4	2	0	0	0	0	0	0	0	0	0	0	12	10	16	4	14	12	4	0	2	0	2	2	230
d__Archaea	k__unclassified_d__Archaea	p__Euryarchaeota	c__Halobacteria	o__Halobacteriales	f__Halobacteriaceae	g__Halobacterium	s__Halobacterium_sp._R2-5	24	2	8	46	28	18	34	22	22	32	48	34	70	52	48	82	40	38	12	4	20	8	26	4	44	16	28	24	28	42	2	6	0	8	4	4	928
d__Archaea	k__unclassified_d__Archaea	p__Euryarchaeota	c__Halobacteria	o__Halobacteriales	f__Halobacteriaceae	g__Halobacterium	s__Halobacterium_sp._TGN-42-S1	0	0	2	4	4	8	4	0	2	14	18	10	0	2	0	0	0	0	0	2	0	0	0	0	0	0	0	0	0	0	0	0	0	0	0	0	70
d__Archaea	k__unclassified_d__Archaea	p__Euryarchaeota	c__Halobacteria	o__Halobacteriales	f__Halobacteriaceae	g__Halobacterium	s__Halobacterium_wangiae	28	36	14	26	18	38	36	52	68	48	52	42	62	24	12	26	20	10	12	20	16	6	12	14	24	18	46	26	16	26	14	4	4	8	12	10	900
d__Archaea	k__unclassified_d__Archaea	p__Euryarchaeota	c__Halobacteria	o__Halobacteriales	f__Halobacteriaceae	g__Halobacterium	s__Halobacterium_zhouii	4	12	10	26	18	24	6	26	32	20	14	18	42	52	34	22	10	30	12	12	34	18	22	14	46	52	64	12	34	26	50	34	68	104	64	82	1148
d__Archaea	k__unclassified_d__Archaea	p__Euryarchaeota	c__Halobacteria	o__Halobacteriales	f__Halobacteriaceae	g__Halocalculus	s__Halocalculus_aciditolerans	64	18	30	26	36	20	36	56	30	22	32	36	30	28	10	24	8	22	42	26	22	64	14	10	18	22	20	24	24	30	10	24	10	14	16	14	932
d__Archaea	k__unclassified_d__Archaea	p__Euryarchaeota	c__Halobacteria	o__Halobacteriales	f__Halobacteriaceae	g__Halodesulfurarchaeum	s__Halodesulfurarchaeum_formicicum	46	22	24	8	12	14	26	22	28	6	18	4	6	22	16	2	14	4	26	14	20	22	16	12	26	2	12	8	8	16	18	18	18	22	20	24	596
d__Archaea	k__unclassified_d__Archaea	p__Euryarchaeota	c__Halobacteria	o__Halobacteriales	f__Halobacteriaceae	g__Halodesulfurarchaeum	s__Halodesulfurarchaeum_sp.	0	0	0	14	2	4	0	8	2	8	12	6	4	28	10	2	0	8	0	2	0	0	0	0	0	0	0	0	0	0	0	0	0	0	0	2	112
d__Archaea	k__unclassified_d__Archaea	p__Euryarchaeota	c__Halobacteria	o__Halobacteriales	f__Halobacteriaceae	g__Salarchaeum	s__Salarchaeum_japonicum	2	6	14	6	12	18	24	28	24	12	22	16	2	10	10	6	12	6	10	8	6	0	0	2	28	12	8	2	2	12	8	8	6	6	4	8	360
d__Archaea	k__unclassified_d__Archaea	p__Euryarchaeota	c__Halobacteria	o__Halobacteriales	f__Halobacteriaceae	g__Salarchaeum	s__Salarchaeum_sp._JOR-1	16	2	4	0	10	4	4	4	8	16	6	4	8	0	6	10	12	6	0	0	2	12	0	0	6	4	0	4	6	0	10	2	8	16	10	8	208
d__Archaea	k__unclassified_d__Archaea	p__Euryarchaeota	c__Halobacteria	o__Halobacteriales	f__Halococcaceae	g__Halalkalicoccus	s__Halalkalicoccus_jeotgali	10	2	10	54	68	28	36	44	32	58	48	44	48	34	30	30	24	38	16	36	48	6	14	24	60	54	60	54	52	66	14	20	16	20	20	12	1230
d__Archaea	k__unclassified_d__Archaea	p__Euryarchaeota	c__Halobacteria	o__Halobacteriales	f__Halococcaceae	g__Halalkalicoccus	s__Halalkalicoccus_paucihalophilus	0	4	0	26	18	20	42	22	28	12	36	14	10	8	6	0	0	2	26	32	16	62	32	18	40	50	72	32	22	54	0	2	2	2	6	2	718
d__Archaea	k__unclassified_d__Archaea	p__Euryarchaeota	c__Halobacteria	o__Halobacteriales	f__Halococcaceae	g__Halalkalicoccus	s__Halalkalicoccus_sp.	12	12	20	60	48	66	56	72	54	96	84	58	22	18	14	22	14	18	32	44	30	24	20	26	20	24	6	40	14	22	42	56	48	60	78	58	1390
d__Archaea	k__unclassified_d__Archaea	p__Euryarchaeota	c__Halobacteria	o__Halobacteriales	f__Halococcaceae	g__Halalkalicoccus	s__Halalkalicoccus_sp._NIPERK01	60	34	28	308	210	264	262	260	230	200	228	224	166	150	82	80	28	118	46	40	66	22	68	76	104	130	82	96	100	174	28	40	42	44	26	32	4148
d__Archaea	k__unclassified_d__Archaea	p__Euryarchaeota	c__Halobacteria	o__Halobacteriales	f__Halococcaceae	g__Halalkalicoccus	s__Halalkalicoccus_subterraneus	0	4	2	20	18	16	18	18	34	4	18	12	2	10	2	0	0	4	8	6	16	14	0	6	38	36	30	68	58	64	12	16	10	18	12	32	626
d__Archaea	k__unclassified_d__Archaea	p__Euryarchaeota	c__Halobacteria	o__Halobacteriales	f__Halococcaceae	g__Halococcus	s__Halococcus_agarilyticus	28	42	24	108	64	104	82	86	74	94	98	54	74	86	118	70	68	76	86	38	56	110	30	70	80	56	36	166	146	152	54	62	56	74	78	66	2766
d__Archaea	k__unclassified_d__Archaea	p__Euryarchaeota	c__Halobacteria	o__Halobacteriales	f__Halococcaceae	g__Halococcus	s__Halococcus_dombrowskii	0	0	0	8	12	4	0	2	0	0	4	0	2	0	4	2	0	0	2	12	2	20	12	16	2	2	2	4	10	2	2	0	8	2	4	4	144
d__Archaea	k__unclassified_d__Archaea	p__Euryarchaeota	c__Halobacteria	o__Halobacteriales	f__Halococcaceae	g__Halococcus	s__Halococcus_hamelinensis	38	28	40	54	22	34	22	56	56	50	42	54	52	32	24	26	2	26	50	26	64	40	34	40	54	46	68	44	38	56	22	38	18	34	22	28	1380
d__Archaea	k__unclassified_d__Archaea	p__Euryarchaeota	c__Halobacteria	o__Halobacteriales	f__Halococcaceae	g__Halococcus	s__Halococcus_morrhuae	0	0	0	0	2	0	6	8	8	4	6	0	4	4	0	12	0	4	0	0	4	4	12	2	8	6	8	6	12	14	2	0	0	2	0	0	138
d__Archaea	k__unclassified_d__Archaea	p__Euryarchaeota	c__Halobacteria	o__Halobacteriales	f__Halococcaceae	g__Halococcus	s__Halococcus_qingdaonensis	0	0	0	6	6	8	16	10	24	6	16	18	4	8	2	0	0	0	2	0	2	0	4	6	0	8	4	2	0	6	2	2	0	0	4	4	170
d__Archaea	k__unclassified_d__Archaea	p__Euryarchaeota	c__Halobacteria	o__Halobacteriales	f__Halococcaceae	g__Halococcus	s__Halococcus_saccharolyticus	80	46	92	84	94	112	70	126	124	94	114	102	70	48	52	30	18	44	34	40	42	36	44	14	102	62	68	20	44	56	48	24	16	38	28	28	2144
d__Archaea	k__unclassified_d__Archaea	p__Euryarchaeota	c__Halobacteria	o__Halobacteriales	f__Halococcaceae	g__Halococcus	s__Halococcus_salifodinae	28	24	20	36	46	40	54	40	64	50	82	46	52	96	60	16	20	24	50	38	62	20	46	36	136	122	148	140	106	180	160	102	148	130	88	180	2690
d__Archaea	k__unclassified_d__Archaea	p__Euryarchaeota	c__Halobacteria	o__Halobacteriales	f__Halococcaceae	g__Halococcus	s__Halococcus_salsus	12	16	34	8	16	34	36	34	24	24	6	16	4	6	2	18	0	16	14	32	8	28	18	10	6	2	0	6	4	4	2	2	0	4	6	0	452
d__Archaea	k__unclassified_d__Archaea	p__Euryarchaeota	c__Halobacteria	o__Halobacteriales	f__Halococcaceae	g__Halococcus	s__Halococcus_sediminicola	156	78	118	62	38	62	58	40	90	40	42	30	58	56	40	38	8	50	26	18	58	30	42	14	72	46	32	108	36	80	48	26	52	50	10	34	1846
d__Archaea	k__unclassified_d__Archaea	p__Euryarchaeota	c__Halobacteria	o__Halobacteriales	f__Halococcaceae	g__Halococcus	s__Halococcus_sp.	108	38	38	30	14	40	26	20	32	12	28	36	12	16	16	8	24	20	12	10	16	12	2	12	0	0	8	0	2	2	12	20	12	14	4	20	676
d__Archaea	k__unclassified_d__Archaea	p__Euryarchaeota	c__Halobacteria	o__Halobacteriales	f__Halococcaceae	g__Halococcus	s__Halococcus_sp._IIIV-5B	4	24	12	30	38	28	40	18	34	20	14	16	20	16	2	4	4	2	26	26	28	36	20	16	60	50	44	12	36	26	40	78	72	86	54	68	1104
d__Archaea	k__unclassified_d__Archaea	p__Euryarchaeota	c__Halobacteria	o__Halobacteriales	f__Halococcaceae	g__Halococcus	s__Halococcus_sp._PRR34	0	0	0	2	0	6	0	0	8	4	2	10	8	2	2	28	6	12	32	24	32	52	8	16	34	18	26	40	28	46	10	6	8	2	8	6	486
d__Archaea	k__unclassified_d__Archaea	p__Euryarchaeota	c__Halobacteria	o__Halobacteriales	f__Halococcaceae	g__Halococcus	s__Halococcus_thailandensis	82	36	74	54	36	32	28	50	76	36	38	50	68	36	40	38	36	28	20	8	34	20	14	4	98	98	100	110	72	140	38	40	32	42	48	52	1808
d__Archaea	k__unclassified_d__Archaea	p__Euryarchaeota	c__Halobacteria	o__Halobacteriales	f__Halorubellaceae	g__Haloarchaeobius	s__Haloarchaeobius_amylolyticus	18	32	36	250	194	250	210	220	284	228	276	254	246	170	80	112	118	160	42	28	46	52	76	68	62	60	60	72	52	62	72	114	76	104	122	112	4418
d__Archaea	k__unclassified_d__Archaea	p__Euryarchaeota	c__Halobacteria	o__Halobacteriales	f__Halorubellaceae	g__Haloarchaeobius	s__Haloarchaeobius_iranensis	2	0	0	12	20	12	20	18	30	16	16	20	20	0	8	4	0	0	12	4	20	70	22	16	28	28	12	22	38	20	0	0	2	0	4	0	496
d__Archaea	k__unclassified_d__Archaea	p__Euryarchaeota	c__Halobacteria	o__Halobacteriales	f__Halorubellaceae	g__Haloarchaeobius	s__Haloarchaeobius_litoreus	44	34	28	116	70	70	90	114	90	116	110	68	84	86	58	92	120	56	20	24	18	52	64	62	42	34	44	10	18	12	72	40	36	48	78	62	2182
d__Archaea	k__unclassified_d__Archaea	p__Euryarchaeota	c__Halobacteria	o__Halobacteriales	f__Halorubellaceae	g__Haloarchaeobius	s__Haloarchaeobius_salinus	20	10	10	16	10	26	24	16	14	24	22	14	24	18	24	16	20	30	12	16	22	18	14	24	102	94	80	250	88	314	16	2	8	6	6	14	1424
d__Archaea	k__unclassified_d__Archaea	p__Euryarchaeota	c__Halobacteria	o__Halobacteriales	f__Halorubellaceae	g__Haloarchaeobius	s__Haloarchaeobius_sp._FL176	8	6	2	44	46	40	42	32	42	20	40	16	12	18	4	36	88	22	18	10	24	28	32	40	14	24	18	22	14	38	2	12	12	14	4	8	852
d__Archaea	k__unclassified_d__Archaea	p__Euryarchaeota	c__Halobacteria	o__Halobacteriales	f__Halorubellaceae	g__Haloarchaeobius	s__Haloarchaeobius_sp._HME9146	50	50	78	174	144	154	208	200	184	264	308	228	158	114	108	72	48	60	164	220	248	130	62	98	166	156	132	134	172	158	108	122	94	76	94	82	5018
d__Archaea	k__unclassified_d__Archaea	p__Euryarchaeota	c__Halobacteria	o__Halobacteriales	f__Halorubellaceae	g__Halorubellus	s__Halorubellus_salinus	2	2	2	22	0	16	8	8	14	12	14	4	36	12	2	10	6	4	20	22	40	50	32	14	72	80	76	48	80	96	42	36	20	32	46	58	1038
d__Archaea	k__unclassified_d__Archaea	p__Euryarchaeota	c__Halobacteria	o__Halobacteriales	f__Halorubellaceae	g__Halorubellus	s__Halorubellus_sp._JP-L1	16	8	12	26	38	32	20	44	22	20	24	42	30	22	24	4	0	14	2	4	4	12	0	4	20	16	14	26	10	22	20	6	6	10	6	14	594
d__Archaea	k__unclassified_d__Archaea	p__Euryarchaeota	c__Halobacteria	o__Halobacteriales	f__Natronoarchaeaceae	g__Halostella	s__Halostella_litorea	6	14	24	46	24	40	28	26	48	24	22	18	52	40	54	52	72	46	32	10	30	6	14	18	12	16	12	16	6	18	40	30	22	34	24	32	1008
d__Archaea	k__unclassified_d__Archaea	p__Euryarchaeota	c__Halobacteria	o__Halobacteriales	f__Natronoarchaeaceae	g__Halostella	s__Halostella_pelagica	8	20	24	2	10	10	0	4	12	4	6	2	22	8	22	18	8	10	0	0	4	0	6	0	28	26	18	28	20	16	2	2	0	6	6	2	354
d__Archaea	k__unclassified_d__Archaea	p__Euryarchaeota	c__Halobacteria	o__Halobacteriales	f__Natronoarchaeaceae	g__Halostella	s__Halostella_salina	8	2	2	16	18	38	14	12	40	10	8	16	14	14	4	6	0	0	12	6	4	26	42	26	28	24	24	32	18	52	6	10	8	14	0	12	566
d__Archaea	k__unclassified_d__Archaea	p__Euryarchaeota	c__Halobacteria	o__Halobacteriales	f__Natronoarchaeaceae	g__Halostella	s__Halostella_sp.	20	20	10	38	16	48	38	64	40	48	48	58	46	40	20	30	26	22	4	4	2	12	2	6	36	20	42	36	48	24	14	34	26	38	60	48	1088
d__Archaea	k__unclassified_d__Archaea	p__Euryarchaeota	c__Halobacteria	o__Halobacteriales	f__Natronoarchaeaceae	g__Natranaeroarchaeum	s__Natranaeroarchaeum_aerophilus	96	32	64	0	8	8	4	0	6	6	6	2	24	32	24	8	10	14	10	10	12	16	14	4	14	20	6	10	14	20	38	38	28	38	14	42	692
d__Archaea	k__unclassified_d__Archaea	p__Euryarchaeota	c__Halobacteria	o__Halobacteriales	f__Natronoarchaeaceae	g__Natranaeroarchaeum	s__Natranaeroarchaeum_sp.	8	0	6	0	0	0	0	0	0	0	0	0	0	0	0	0	0	0	0	0	0	4	6	6	0	0	0	0	0	0	0	0	0	0	0	0	30
d__Archaea	k__unclassified_d__Archaea	p__Euryarchaeota	c__Halobacteria	o__Halobacteriales	f__Natronoarchaeaceae	g__Natranaeroarchaeum	s__Natranaeroarchaeum_sulfidigenes	36	22	20	4	6	4	0	10	30	14	12	8	8	18	8	4	2	10	32	20	6	52	8	12	26	22	18	10	20	24	80	82	68	44	46	72	858
d__Archaea	k__unclassified_d__Archaea	p__Euryarchaeota	c__Halobacteria	o__Halobacteriales	f__Natronoarchaeaceae	g__Natronoarchaeum	s__Natronoarchaeum_philippinense	0	0	4	8	14	8	20	8	18	4	4	18	0	6	2	0	0	10	14	18	28	32	18	14	30	40	32	40	44	86	30	8	8	12	20	14	612
d__Archaea	k__unclassified_d__Archaea	p__Euryarchaeota	c__Halobacteria	o__Halobacteriales	f__Natronoarchaeaceae	g__Natronoarchaeum	s__Natronoarchaeum_rubrum	10	0	4	2	8	14	8	12	4	4	6	4	12	10	34	4	2	2	10	16	34	18	2	6	32	10	16	26	30	28	12	12	8	4	14	16	434
d__Archaea	k__unclassified_d__Archaea	p__Euryarchaeota	c__Halobacteria	o__Halobacteriales	f__Natronoarchaeaceae	g__Salinarchaeum	s__Salinarchaeum_laminariae	0	0	0	18	14	10	14	30	4	4	8	12	8	4	0	2	8	4	0	0	0	0	0	0	0	0	0	0	0	0	0	2	0	0	0	0	142
d__Archaea	k__unclassified_d__Archaea	p__Euryarchaeota	c__Halobacteria	o__Halobacteriales	f__Natronoarchaeaceae	g__Salinarchaeum	s__Salinarchaeum_sp._Harcht-Bsk1	14	2	14	22	8	26	6	14	12	4	28	20	24	22	2	2	2	10	46	40	70	72	28	32	116	90	68	140	104	132	36	40	38	48	64	38	1434
d__Archaea	k__unclassified_d__Archaea	p__Euryarchaeota	c__Halobacteria	o__Halobacteriales	f__Natronoarchaeaceae	g__Salinarchaeum	s__Salinarchaeum_sp._IM2453	2	4	10	16	10	8	12	12	22	12	14	14	62	44	46	50	40	18	24	28	12	2	6	2	4	8	2	0	2	2	22	24	20	18	32	22	626
d__Archaea	k__unclassified_d__Archaea	p__Euryarchaeota	c__Halobacteria	o__Halobacteriales	f__unclassified_o__Halobacteriales	g__unclassified_o__Halobacteriales	s__Halobacteriales_archaeon	414	284	330	888	724	742	666	888	610	750	694	654	512	428	336	232	212	256	272	240	312	276	320	292	262	186	176	382	322	404	380	378	358	406	410	404	15400
d__Archaea	k__unclassified_d__Archaea	p__Euryarchaeota	c__Halobacteria	o__Halobacteriales	f__unclassified_o__Halobacteriales	g__unclassified_o__Halobacteriales	s__Halobacteriales_archaeon_QH_10_65_19	0	0	0	10	4	4	4	0	6	0	8	6	2	0	0	0	0	0	8	14	6	10	0	0	20	18	36	30	26	46	0	0	0	0	0	0	258
d__Archaea	k__unclassified_d__Archaea	p__Euryarchaeota	c__Halobacteria	o__Halobacteriales	f__unclassified_o__Halobacteriales	g__unclassified_o__Halobacteriales	s__Halobacteriales_archaeon_QH_10_67_13	46	24	30	16	0	2	2	0	0	6	2	0	2	0	2	4	0	0	0	0	0	0	0	2	0	0	0	0	0	0	0	0	0	0	0	0	138
d__Archaea	k__unclassified_d__Archaea	p__Euryarchaeota	c__Halobacteria	o__Halobacteriales	f__unclassified_o__Halobacteriales	g__unclassified_o__Halobacteriales	s__Halobacteriales_archaeon_QH_10_67_22	18	26	8	6	6	2	2	0	6	8	16	4	18	10	20	20	2	10	8	16	8	10	6	10	22	2	22	8	12	10	2	4	0	2	2	0	326
d__Archaea	k__unclassified_d__Archaea	p__Euryarchaeota	c__Halobacteria	o__Halobacteriales	f__unclassified_o__Halobacteriales	g__unclassified_o__Halobacteriales	s__Halobacteriales_archaeon_QH_10_70_21	6	14	14	38	20	22	26	26	6	44	30	28	12	20	12	14	22	26	16	8	14	16	30	16	28	26	24	30	20	34	16	10	10	30	4	6	718
d__Archaea	k__unclassified_d__Archaea	p__Euryarchaeota	c__Halobacteria	o__Halobacteriales	f__unclassified_o__Halobacteriales	g__unclassified_o__Halobacteriales	s__Halobacteriales_archaeon_QH_1_68_42	0	0	6	6	2	22	20	12	26	12	28	22	2	0	0	0	0	0	2	14	0	10	2	6	6	4	0	2	2	8	0	0	0	0	0	0	214
d__Archaea	k__unclassified_d__Archaea	p__Euryarchaeota	c__Halobacteria	o__Halobacteriales	f__unclassified_o__Halobacteriales	g__unclassified_o__Halobacteriales	s__Halobacteriales_archaeon_QH_2_65_14	194	58	126	24	24	12	18	26	24	70	44	22	28	4	4	4	0	10	8	10	24	18	10	12	20	20	22	14	28	18	10	10	12	10	6	22	966
d__Archaea	k__unclassified_d__Archaea	p__Euryarchaeota	c__Halobacteria	o__Halobacteriales	f__unclassified_o__Halobacteriales	g__unclassified_o__Halobacteriales	s__Halobacteriales_archaeon_QH_2_66_30	6	10	10	2	0	10	4	16	20	14	4	8	88	88	72	40	6	34	6	2	22	8	6	2	12	4	10	24	34	12	14	18	18	8	4	18	654
d__Archaea	k__unclassified_d__Archaea	p__Euryarchaeota	c__Halobacteria	o__Halobacteriales	f__unclassified_o__Halobacteriales	g__unclassified_o__Halobacteriales	s__Halobacteriales_archaeon_QH_3_68_24	0	0	0	12	16	6	18	4	16	14	6	32	8	12	16	14	12	16	0	0	2	2	8	2	14	18	14	16	8	10	6	6	2	2	16	4	332
d__Archaea	k__unclassified_d__Archaea	p__Euryarchaeota	c__Halobacteria	o__Halobacteriales	f__unclassified_o__Halobacteriales	g__unclassified_o__Halobacteriales	s__Halobacteriales_archaeon_QH_6_64_20	12	0	16	32	18	18	24	18	34	18	20	14	16	22	18	34	16	14	14	4	12	14	32	58	20	26	34	30	12	38	18	4	6	6	16	20	708
d__Archaea	k__unclassified_d__Archaea	p__Euryarchaeota	c__Halobacteria	o__Halobacteriales	f__unclassified_o__Halobacteriales	g__unclassified_o__Halobacteriales	s__Halobacteriales_archaeon_QH_6_66_25	4	0	0	0	0	2	2	0	0	0	4	0	26	6	6	6	0	2	10	6	16	8	0	2	16	18	18	6	0	14	4	4	12	12	12	12	228
d__Archaea	k__unclassified_d__Archaea	p__Euryarchaeota	c__Halobacteria	o__Halobacteriales	f__unclassified_o__Halobacteriales	g__unclassified_o__Halobacteriales	s__Halobacteriales_archaeon_QH_6_68_27	0	4	0	2	2	14	12	6	0	18	16	2	2	0	2	0	0	2	0	0	0	0	0	0	0	0	0	0	0	0	0	0	0	0	0	0	82
d__Archaea	k__unclassified_d__Archaea	p__Euryarchaeota	c__Halobacteria	o__Halobacteriales	f__unclassified_o__Halobacteriales	g__unclassified_o__Halobacteriales	s__Halobacteriales_archaeon_QH_7_65_31	0	0	0	0	0	2	2	2	6	0	2	0	2	14	0	8	0	22	0	0	0	0	0	0	8	6	2	0	4	2	0	0	0	0	0	0	82
d__Archaea	k__unclassified_d__Archaea	p__Euryarchaeota	c__Halobacteria	o__Halobacteriales	f__unclassified_o__Halobacteriales	g__unclassified_o__Halobacteriales	s__Halobacteriales_archaeon_QH_7_66_36	2	0	0	18	10	12	18	10	4	12	14	16	0	0	0	2	0	0	0	0	4	0	14	0	10	8	6	6	4	2	0	0	0	0	0	0	172
d__Archaea	k__unclassified_d__Archaea	p__Euryarchaeota	c__Halobacteria	o__Halobacteriales	f__unclassified_o__Halobacteriales	g__unclassified_o__Halobacteriales	s__Halobacteriales_archaeon_QH_7_66_37	6	12	4	6	2	2	6	2	2	0	6	0	2	0	0	0	0	0	0	0	0	0	0	0	4	2	2	6	0	2	0	0	0	0	0	0	66
d__Archaea	k__unclassified_d__Archaea	p__Euryarchaeota	c__Halobacteria	o__Halobacteriales	f__unclassified_o__Halobacteriales	g__unclassified_o__Halobacteriales	s__Halobacteriales_archaeon_QH_7_68_42	0	2	0	0	0	0	0	0	0	0	0	0	0	2	0	2	0	0	0	0	0	0	0	0	0	0	0	0	0	0	0	0	0	0	0	0	6
d__Archaea	k__unclassified_d__Archaea	p__Euryarchaeota	c__Halobacteria	o__Halobacteriales	f__unclassified_o__Halobacteriales	g__unclassified_o__Halobacteriales	s__Halobacteriales_archaeon_QH_7_69_31	12	10	4	22	16	28	20	28	12	18	28	20	28	16	8	8	0	4	0	4	0	4	4	0	18	14	10	0	8	8	18	12	18	16	22	10	448
d__Archaea	k__unclassified_d__Archaea	p__Euryarchaeota	c__Halobacteria	o__Halobacteriales	f__unclassified_o__Halobacteriales	g__unclassified_o__Halobacteriales	s__Halobacteriales_archaeon_QH_8_64_26	12	2	10	20	22	34	32	18	54	18	34	16	16	16	10	18	12	26	18	12	26	36	12	12	18	10	32	18	20	26	38	22	42	36	52	22	822
d__Archaea	k__unclassified_d__Archaea	p__Euryarchaeota	c__Halobacteria	o__Halobacteriales	f__unclassified_o__Halobacteriales	g__unclassified_o__Halobacteriales	s__Halobacteriales_archaeon_QH_8_67_27	2	30	4	4	2	2	12	4	0	6	14	4	0	14	16	10	6	4	10	14	8	6	12	10	10	16	6	10	10	22	10	18	6	24	12	24	362
d__Archaea	k__unclassified_d__Archaea	p__Euryarchaeota	c__Halobacteria	o__Halobacteriales	f__unclassified_o__Halobacteriales	g__unclassified_o__Halobacteriales	s__Halobacteriales_archaeon_QH_8_67_36	0	4	4	2	0	0	4	12	0	0	2	2	4	0	4	0	0	0	10	10	18	110	16	2	2	2	0	0	0	2	0	2	0	0	0	0	212
d__Archaea	k__unclassified_d__Archaea	p__Euryarchaeota	c__Halobacteria	o__Halobacteriales	f__unclassified_o__Halobacteriales	g__unclassified_o__Halobacteriales	s__Halobacteriales_archaeon_QH_8_68_33	0	0	0	0	0	0	0	0	0	0	0	0	2	0	0	12	8	4	0	0	0	0	0	0	0	0	0	0	0	0	0	0	0	0	0	0	26
d__Archaea	k__unclassified_d__Archaea	p__Euryarchaeota	c__Halobacteria	o__Halobacteriales	f__unclassified_o__Halobacteriales	g__unclassified_o__Halobacteriales	s__Halobacteriales_archaeon_QH_9_66_26	0	0	0	22	10	26	20	20	18	14	8	18	12	0	2	2	0	12	4	2	2	6	6	2	18	26	38	4	2	8	0	2	2	4	2	0	312
d__Archaea	k__unclassified_d__Archaea	p__Euryarchaeota	c__Halobacteria	o__Halobacteriales	f__unclassified_o__Halobacteriales	g__unclassified_o__Halobacteriales	s__Halobacteriales_archaeon_QS_1_67_19	34	28	32	350	220	278	366	358	294	270	300	262	238	186	126	92	44	70	58	64	62	90	88	86	156	122	126	110	110	156	70	38	42	62	32	68	5088
d__Archaea	k__unclassified_d__Archaea	p__Euryarchaeota	c__Halobacteria	o__Halobacteriales	f__unclassified_o__Halobacteriales	g__unclassified_o__Halobacteriales	s__Halobacteriales_archaeon_QS_1_68_17	2	0	0	2	0	0	0	0	0	2	2	0	0	10	0	6	0	8	2	0	2	4	4	0	4	2	8	10	4	2	16	6	14	4	4	6	124
d__Archaea	k__unclassified_d__Archaea	p__Euryarchaeota	c__Halobacteria	o__Halobacteriales	f__unclassified_o__Halobacteriales	g__unclassified_o__Halobacteriales	s__Halobacteriales_archaeon_QS_1_68_20	22	2	10	82	38	66	78	66	108	112	96	68	56	26	22	24	4	30	12	10	10	14	10	18	20	14	4	14	30	44	6	10	16	14	16	10	1182
d__Archaea	k__unclassified_d__Archaea	p__Euryarchaeota	c__Halobacteria	o__Halobacteriales	f__unclassified_o__Halobacteriales	g__unclassified_o__Halobacteriales	s__Halobacteriales_archaeon_QS_1_68_44	0	0	2	2	2	6	12	6	4	8	8	0	2	0	0	0	0	2	0	0	4	14	14	14	4	6	0	4	0	4	0	0	0	2	2	0	122
d__Archaea	k__unclassified_d__Archaea	p__Euryarchaeota	c__Halobacteria	o__Halobacteriales	f__unclassified_o__Halobacteriales	g__unclassified_o__Halobacteriales	s__Halobacteriales_archaeon_QS_1_69_70	4	0	12	12	4	2	2	2	0	8	0	6	6	0	0	2	0	4	0	8	6	12	4	2	18	62	26	44	18	34	4	8	6	16	0	2	334
d__Archaea	k__unclassified_d__Archaea	p__Euryarchaeota	c__Halobacteria	o__Halobacteriales	f__unclassified_o__Halobacteriales	g__unclassified_o__Halobacteriales	s__Halobacteriales_archaeon_QS_3_64_16	6	4	0	20	18	10	16	22	28	8	36	14	6	26	4	6	2	6	14	24	24	48	24	6	66	58	44	4	16	38	18	16	26	22	20	30	730
d__Archaea	k__unclassified_d__Archaea	p__Euryarchaeota	c__Halobacteria	o__Halobacteriales	f__unclassified_o__Halobacteriales	g__unclassified_o__Halobacteriales	s__Halobacteriales_archaeon_QS_4_62_28	4	0	0	0	0	4	0	0	2	2	4	6	10	4	4	0	2	0	2	0	6	8	0	4	0	2	10	6	2	2	10	16	8	10	10	10	148
d__Archaea	k__unclassified_d__Archaea	p__Euryarchaeota	c__Halobacteria	o__Halobacteriales	f__unclassified_o__Halobacteriales	g__unclassified_o__Halobacteriales	s__Halobacteriales_archaeon_QS_4_66_20	154	46	124	4	2	4	16	6	10	8	20	10	6	0	0	0	0	2	2	0	0	0	2	0	0	6	0	8	6	4	0	0	0	0	0	0	440
d__Archaea	k__unclassified_d__Archaea	p__Euryarchaeota	c__Halobacteria	o__Halobacteriales	f__unclassified_o__Halobacteriales	g__unclassified_o__Halobacteriales	s__Halobacteriales_archaeon_QS_4_69_225	0	0	2	10	10	8	6	16	10	12	8	8	6	4	6	2	2	0	2	2	4	2	0	0	16	4	6	6	16	6	4	2	2	4	12	0	198
d__Archaea	k__unclassified_d__Archaea	p__Euryarchaeota	c__Halobacteria	o__Halobacteriales	f__unclassified_o__Halobacteriales	g__unclassified_o__Halobacteriales	s__Halobacteriales_archaeon_QS_4_69_31	22	6	6	30	6	10	46	34	18	36	24	34	10	16	8	6	4	8	12	4	18	12	42	14	34	14	28	16	12	22	26	16	18	18	42	20	692
d__Archaea	k__unclassified_d__Archaea	p__Euryarchaeota	c__Halobacteria	o__Halobacteriales	f__unclassified_o__Halobacteriales	g__unclassified_o__Halobacteriales	s__Halobacteriales_archaeon_QS_4_69_34	222	102	144	26	56	38	54	38	42	34	50	36	24	12	22	20	8	10	24	50	34	262	54	46	2	10	10	2	4	10	4	12	10	8	6	2	1488
d__Archaea	k__unclassified_d__Archaea	p__Euryarchaeota	c__Halobacteria	o__Halobacteriales	f__unclassified_o__Halobacteriales	g__unclassified_o__Halobacteriales	s__Halobacteriales_archaeon_QS_4_70_19	14	12	22	8	12	12	2	2	18	6	16	4	40	8	20	2	10	6	6	12	10	32	16	0	14	10	14	36	26	18	4	6	4	4	6	4	436
d__Archaea	k__unclassified_d__Archaea	p__Euryarchaeota	c__Halobacteria	o__Halobacteriales	f__unclassified_o__Halobacteriales	g__unclassified_o__Halobacteriales	s__Halobacteriales_archaeon_QS_5_68_33	0	2	2	4	4	8	4	2	6	10	0	6	2	12	4	2	0	16	0	2	0	0	0	0	0	0	0	0	0	0	2	0	0	0	2	0	90
d__Archaea	k__unclassified_d__Archaea	p__Euryarchaeota	c__Halobacteria	o__Halobacteriales	f__unclassified_o__Halobacteriales	g__unclassified_o__Halobacteriales	s__Halobacteriales_archaeon_QS_5_70_15	34	62	34	100	66	142	90	90	102	110	122	154	74	94	42	84	46	54	22	10	26	24	32	20	94	104	78	66	86	138	26	34	32	50	32	40	2414
d__Archaea	k__unclassified_d__Archaea	p__Euryarchaeota	c__Halobacteria	o__Halobacteriales	f__unclassified_o__Halobacteriales	g__unclassified_o__Halobacteriales	s__Halobacteriales_archaeon_QS_5_70_17	22	16	20	36	12	24	6	16	16	34	22	14	36	38	20	34	16	24	12	8	22	34	22	22	28	24	30	10	18	30	26	34	50	56	36	44	912
d__Archaea	k__unclassified_d__Archaea	p__Euryarchaeota	c__Halobacteria	o__Halobacteriales	f__unclassified_o__Halobacteriales	g__unclassified_o__Halobacteriales	s__Halobacteriales_archaeon_QS_6_64_34	16	8	8	2	18	14	18	20	12	22	12	28	52	26	22	16	14	14	0	2	4	0	0	8	18	12	16	14	12	20	0	2	0	0	0	0	430
d__Archaea	k__unclassified_d__Archaea	p__Euryarchaeota	c__Halobacteria	o__Halobacteriales	f__unclassified_o__Halobacteriales	g__unclassified_o__Halobacteriales	s__Halobacteriales_archaeon_QS_6_71_20	0	0	2	10	12	18	36	24	4	20	12	10	2	8	0	0	0	4	0	0	0	0	0	0	0	0	0	0	0	0	0	0	2	0	0	0	164
d__Archaea	k__unclassified_d__Archaea	p__Euryarchaeota	c__Halobacteria	o__Halobacteriales	f__unclassified_o__Halobacteriales	g__unclassified_o__Halobacteriales	s__Halobacteriales_archaeon_QS_7_68_65	0	0	0	8	4	8	6	22	2	14	6	14	10	2	8	0	2	8	4	0	2	2	0	2	0	0	6	0	0	4	2	4	8	16	6	0	170
d__Archaea	k__unclassified_d__Archaea	p__Euryarchaeota	c__Halobacteria	o__Halobacteriales	f__unclassified_o__Halobacteriales	g__unclassified_o__Halobacteriales	s__Halobacteriales_archaeon_QS_7_69_60	0	0	0	6	0	0	0	0	0	0	0	0	0	0	0	0	0	0	0	2	0	0	14	6	0	0	0	0	0	0	0	0	0	0	0	0	28
d__Archaea	k__unclassified_d__Archaea	p__Euryarchaeota	c__Halobacteria	o__Halobacteriales	f__unclassified_o__Halobacteriales	g__unclassified_o__Halobacteriales	s__Halobacteriales_archaeon_QS_8_65_32	16	18	22	54	92	48	84	48	60	110	112	56	48	38	14	8	12	66	8	26	4	10	52	28	50	56	34	22	22	36	20	6	6	8	4	20	1318
d__Archaea	k__unclassified_d__Archaea	p__Euryarchaeota	c__Halobacteria	o__Halobacteriales	f__unclassified_o__Halobacteriales	g__unclassified_o__Halobacteriales	s__Halobacteriales_archaeon_QS_8_69_26	62	54	68	28	22	40	32	26	18	56	42	20	140	128	96	64	72	58	44	34	26	26	50	20	156	168	124	126	102	194	118	108	128	114	116	118	2798
d__Archaea	k__unclassified_d__Archaea	p__Euryarchaeota	c__Halobacteria	o__Halobacteriales	f__unclassified_o__Halobacteriales	g__unclassified_o__Halobacteriales	s__Halobacteriales_archaeon_QS_8_69_73	74	32	20	20	8	6	6	8	8	24	6	2	24	6	4	16	76	4	0	2	6	8	0	0	2	0	4	4	4	2	52	58	56	42	64	86	734
d__Archaea	k__unclassified_d__Archaea	p__Euryarchaeota	c__Halobacteria	o__Halobacteriales	f__unclassified_o__Halobacteriales	g__unclassified_o__Halobacteriales	s__Halobacteriales_archaeon_QS_9_67_15	6	0	0	0	0	0	0	0	0	0	0	2	0	6	4	0	0	2	0	0	0	0	0	0	0	6	0	0	0	0	0	0	2	4	0	4	36
d__Archaea	k__unclassified_d__Archaea	p__Euryarchaeota	c__Halobacteria	o__Halobacteriales	f__unclassified_o__Halobacteriales	g__unclassified_o__Halobacteriales	s__Halobacteriales_archaeon_QS_9_67_17	0	0	0	2	2	0	12	14	0	6	0	10	0	0	0	2	0	0	0	4	0	2	0	2	2	2	6	0	6	0	0	0	0	0	0	0	72
d__Archaea	k__unclassified_d__Archaea	p__Euryarchaeota	c__Halobacteria	o__Halobacteriales	f__unclassified_o__Halobacteriales	g__unclassified_o__Halobacteriales	s__Halobacteriales_archaeon_QS_9_68_17	6	28	8	18	8	6	12	16	12	18	20	18	10	0	6	22	32	28	0	0	2	0	2	0	2	0	4	6	8	12	38	30	28	38	16	16	470
d__Archaea	k__unclassified_d__Archaea	p__Euryarchaeota	c__Halobacteria	o__Halobacteriales	f__unclassified_o__Halobacteriales	g__unclassified_o__Halobacteriales	s__Halobacteriales_archaeon_QS_9_68_42	10	4	4	2	2	0	0	0	0	8	2	2	0	0	0	0	0	0	0	8	0	0	0	0	0	0	0	0	0	0	0	0	0	0	0	0	42
d__Archaea	k__unclassified_d__Archaea	p__Euryarchaeota	c__Halobacteria	o__Halobacteriales	f__unclassified_o__Halobacteriales	g__unclassified_o__Halobacteriales	s__Halobacteriales_archaeon_QS_9_70_65	2	0	0	10	8	0	12	2	6	14	14	4	0	0	0	2	0	2	4	6	2	12	12	12	0	0	0	0	0	0	0	0	0	0	0	0	124
d__Archaea	k__unclassified_d__Archaea	p__Euryarchaeota	c__Halobacteria	o__Halobacteriales	f__unclassified_o__Halobacteriales	g__unclassified_o__Halobacteriales	s__Halobacteriales_archaeon_SW_10_66_29	0	2	0	20	10	16	12	24	8	16	30	36	8	12	8	12	0	8	14	26	18	40	12	2	82	44	60	44	42	70	20	10	6	14	28	16	770
d__Archaea	k__unclassified_d__Archaea	p__Euryarchaeota	c__Halobacteria	o__Halobacteriales	f__unclassified_o__Halobacteriales	g__unclassified_o__Halobacteriales	s__Halobacteriales_archaeon_SW_10_68_16	6	2	10	6	6	10	16	8	14	6	14	36	20	4	4	8	20	4	16	12	26	14	20	46	16	32	42	2	4	4	6	10	12	0	4	20	480
d__Archaea	k__unclassified_d__Archaea	p__Euryarchaeota	c__Halobacteria	o__Halobacteriales	f__unclassified_o__Halobacteriales	g__unclassified_o__Halobacteriales	s__Halobacteriales_archaeon_SW_12_67_38	12	0	0	0	0	0	0	0	2	2	4	0	6	16	10	6	0	8	4	6	4	2	2	0	2	12	0	6	6	0	0	0	0	0	0	0	110
d__Archaea	k__unclassified_d__Archaea	p__Euryarchaeota	c__Halobacteria	o__Halobacteriales	f__unclassified_o__Halobacteriales	g__unclassified_o__Halobacteriales	s__Halobacteriales_archaeon_SW_12_69_24	0	0	0	0	0	0	0	0	0	0	0	0	0	0	2	2	0	2	0	0	0	0	0	0	0	0	2	0	0	0	0	0	0	0	0	0	8
d__Archaea	k__unclassified_d__Archaea	p__Euryarchaeota	c__Halobacteria	o__Halobacteriales	f__unclassified_o__Halobacteriales	g__unclassified_o__Halobacteriales	s__Halobacteriales_archaeon_SW_12_71_31	2	0	4	0	2	0	0	0	0	2	0	0	0	2	8	6	0	16	0	0	0	0	0	0	0	0	0	0	0	0	0	0	0	0	0	0	42
d__Archaea	k__unclassified_d__Archaea	p__Euryarchaeota	c__Halobacteria	o__Halobacteriales	f__unclassified_o__Halobacteriales	g__unclassified_o__Halobacteriales	s__Halobacteriales_archaeon_SW_5_68_122	4	0	12	8	0	0	4	2	0	0	0	0	4	0	2	0	0	0	14	8	0	152	18	28	0	4	0	0	2	0	2	6	8	2	14	6	300
d__Archaea	k__unclassified_d__Archaea	p__Euryarchaeota	c__Halobacteria	o__Halobacteriales	f__unclassified_o__Halobacteriales	g__unclassified_o__Halobacteriales	s__Halobacteriales_archaeon_SW_5_70_135	16	10	10	0	0	0	2	0	0	0	0	0	6	16	12	22	0	2	4	0	4	4	6	2	28	6	10	18	18	28	8	8	24	14	10	14	302
d__Archaea	k__unclassified_d__Archaea	p__Euryarchaeota	c__Halobacteria	o__Halobacteriales	f__unclassified_o__Halobacteriales	g__unclassified_o__Halobacteriales	s__Halobacteriales_archaeon_SW_6_65_15	22	62	50	72	72	104	42	72	58	60	64	48	108	42	44	26	10	34	32	34	44	44	36	40	10	2	8	16	26	10	56	28	40	46	52	38	1552
d__Archaea	k__unclassified_d__Archaea	p__Euryarchaeota	c__Halobacteria	o__Halobacteriales	f__unclassified_o__Halobacteriales	g__unclassified_o__Halobacteriales	s__Halobacteriales_archaeon_SW_6_65_46	0	0	0	0	0	0	0	0	0	0	0	0	0	0	0	0	0	0	0	0	0	0	0	0	4	4	0	0	0	0	0	0	0	0	0	0	8
d__Archaea	k__unclassified_d__Archaea	p__Euryarchaeota	c__Halobacteria	o__Halobacteriales	f__unclassified_o__Halobacteriales	g__unclassified_o__Halobacteriales	s__Halobacteriales_archaeon_SW_7_65_23	0	0	0	6	4	0	4	0	4	2	2	0	0	0	0	0	0	2	2	0	0	0	0	0	0	6	6	16	18	8	0	0	2	0	2	0	84
d__Archaea	k__unclassified_d__Archaea	p__Euryarchaeota	c__Halobacteria	o__Halobacteriales	f__unclassified_o__Halobacteriales	g__unclassified_o__Halobacteriales	s__Halobacteriales_archaeon_SW_7_68_16	56	8	34	22	12	8	4	20	18	14	8	24	8	4	4	6	2	2	8	6	16	116	32	42	6	10	10	50	14	20	10	6	2	2	10	2	616
d__Archaea	k__unclassified_d__Archaea	p__Euryarchaeota	c__Halobacteria	o__Halobacteriales	f__unclassified_o__Halobacteriales	g__unclassified_o__Halobacteriales	s__Halobacteriales_archaeon_SW_7_71_33	2	2	6	0	4	8	0	6	0	2	4	2	2	0	0	8	0	0	10	0	2	0	16	10	0	2	0	0	8	0	0	0	2	0	2	0	98
d__Archaea	k__unclassified_d__Archaea	p__Euryarchaeota	c__Halobacteria	o__Halobacteriales	f__unclassified_o__Halobacteriales	g__unclassified_o__Halobacteriales	s__Halobacteriales_archaeon_SW_8_65_20	2	0	4	6	0	4	4	0	4	0	0	0	2	0	0	0	4	4	2	4	0	4	26	0	0	2	14	0	2	12	0	0	0	0	0	4	104
d__Archaea	k__unclassified_d__Archaea	p__Euryarchaeota	c__Halobacteria	o__Halobacteriales	f__unclassified_o__Halobacteriales	g__unclassified_o__Halobacteriales	s__Halobacteriales_archaeon_SW_8_66_22	4	2	0	8	4	2	20	6	14	8	4	6	10	10	0	0	0	0	0	2	4	10	4	2	10	8	2	0	0	8	2	2	10	2	10	10	184
d__Archaea	k__unclassified_d__Archaea	p__Euryarchaeota	c__Halobacteria	o__Halobacteriales	f__unclassified_o__Halobacteriales	g__unclassified_o__Halobacteriales	s__Halobacteriales_archaeon_SW_8_68_21	0	0	0	0	0	0	0	0	0	0	0	0	0	0	0	0	0	0	0	0	0	0	0	4	2	0	6	4	2	2	0	0	0	0	0	0	20
d__Archaea	k__unclassified_d__Archaea	p__Euryarchaeota	c__Halobacteria	o__Halobacteriales	f__unclassified_o__Halobacteriales	g__unclassified_o__Halobacteriales	s__Halobacteriales_archaeon_SW_9_67_24	4	2	0	2	6	6	2	10	6	4	6	8	16	16	4	14	18	14	10	2	0	2	2	6	18	10	8	22	22	22	4	4	0	2	0	2	274
d__Archaea	k__unclassified_d__Archaea	p__Euryarchaeota	c__Halobacteria	o__Halobacteriales	f__unclassified_o__Halobacteriales	g__unclassified_o__Halobacteriales	s__Halobacteriales_archaeon_SW_9_67_25	0	4	0	8	2	8	6	6	6	10	6	4	8	4	0	8	2	6	0	6	4	0	0	0	2	2	4	0	6	4	0	2	6	2	0	0	126
d__Archaea	k__unclassified_d__Archaea	p__Euryarchaeota	c__Halobacteria	o__Halobacteriales	f__unclassified_o__Halobacteriales	g__unclassified_o__Halobacteriales	s__haloarchaeon_3A1-DGR	0	0	0	26	20	28	24	24	14	48	16	6	4	8	18	2	0	0	22	22	12	2	12	10	14	8	8	6	24	16	18	12	8	10	12	14	468
d__Archaea	k__unclassified_d__Archaea	p__Euryarchaeota	c__Halobacteria	o__Halobacteriales	f__unclassified_o__Halobacteriales	g__unclassified_o__Halobacteriales	s__halophilic_archaeon	4	26	18	62	56	62	76	86	26	94	72	70	64	46	28	56	56	44	8	14	28	66	46	14	22	38	40	26	32	46	4	0	10	10	6	8	1364
d__Archaea	k__unclassified_d__Archaea	p__Euryarchaeota	c__Halobacteria	o__Halobacteriales	f__unclassified_o__Halobacteriales	g__unclassified_o__Halobacteriales	s__halophilic_archaeon_J07HB67	6	8	4	16	6	10	6	12	10	26	12	10	2	10	0	8	2	6	4	0	4	4	14	12	0	0	0	0	0	0	0	0	0	0	0	0	192
d__Archaea	k__unclassified_d__Archaea	p__Euryarchaeota	c__Halobacteria	o__Halobacteriales	f__unclassified_o__Halobacteriales	g__unclassified_o__Halobacteriales	s__halophilic_archaeon_J07HX5	0	0	0	14	12	6	0	0	0	0	4	4	2	0	10	0	0	2	2	4	4	10	6	2	2	4	4	2	2	2	0	0	0	0	0	0	98
d__Archaea	k__unclassified_d__Archaea	p__Euryarchaeota	c__Halobacteria	o__Halobacteriales	f__unclassified_o__Halobacteriales	g__unclassified_o__Halobacteriales	s__halophilic_archaeon_J07HX64	2	0	0	36	20	14	12	16	10	16	18	18	8	0	0	0	0	2	2	0	6	6	22	12	14	36	10	34	52	40	6	4	2	4	8	0	430
d__Archaea	k__unclassified_d__Archaea	p__Euryarchaeota	c__Halobacteria	o__Haloferacales	f__Haloferacaceae	g__Candidatus_Halobonum	s__Candidatus_Halobonum_tyrrellensis	194	126	152	44	68	66	60	96	56	82	60	82	60	48	48	30	16	30	44	40	38	18	24	26	66	44	54	50	40	84	30	50	18	26	38	38	2046
d__Archaea	k__unclassified_d__Archaea	p__Euryarchaeota	c__Halobacteria	o__Haloferacales	f__Haloferacaceae	g__Halalkaliarchaeum	s__Halalkaliarchaeum_desulfuricum	20	14	10	16	18	12	26	24	24	36	24	20	8	18	38	14	10	10	12	8	32	4	6	6	32	4	8	12	32	8	42	10	10	20	12	42	642
d__Archaea	k__unclassified_d__Archaea	p__Euryarchaeota	c__Halobacteria	o__Haloferacales	f__Haloferacaceae	g__Halalkaliarchaeum	s__Halalkaliarchaeum_sp.	6	2	0	0	0	2	4	14	2	6	0	4	8	8	14	2	12	10	22	4	8	0	4	14	4	4	4	0	0	4	2	16	8	4	10	16	218
d__Archaea	k__unclassified_d__Archaea	p__Euryarchaeota	c__Halobacteria	o__Haloferacales	f__Haloferacaceae	g__Halalkaliarchaeum	s__Halalkaliarchaeum_sp._AArc-CO	26	46	12	28	28	30	36	20	28	30	14	18	42	62	28	18	34	8	16	10	20	42	2	20	2	2	2	4	4	6	0	2	0	0	2	2	644
d__Archaea	k__unclassified_d__Archaea	p__Euryarchaeota	c__Halobacteria	o__Haloferacales	f__Haloferacaceae	g__Halalkalirubrum	s__Halalkalirubrum_salinum	10	2	2	8	10	20	24	4	20	6	34	12	16	16	30	16	10	16	12	10	10	24	6	2	4	0	0	28	10	8	30	28	22	28	32	36	546
d__Archaea	k__unclassified_d__Archaea	p__Euryarchaeota	c__Halobacteria	o__Haloferacales	f__Haloferacaceae	g__Halegenticoccus	s__Halegenticoccus_soli	54	42	52	190	198	220	242	244	226	258	222	240	118	84	88	86	98	54	102	84	98	96	90	88	234	256	204	194	184	312	68	52	52	46	84	88	5048
d__Archaea	k__unclassified_d__Archaea	p__Euryarchaeota	c__Halobacteria	o__Haloferacales	f__Haloferacaceae	g__Halegenticoccus	s__Halegenticoccus_tardaugens	62	22	34	156	166	192	152	214	220	208	178	158	156	134	44	90	42	80	74	52	94	82	98	102	54	74	52	40	76	106	74	72	54	84	74	46	3616
d__Archaea	k__unclassified_d__Archaea	p__Euryarchaeota	c__Halobacteria	o__Haloferacales	f__Haloferacaceae	g__Halobaculum	s__Halobaculum_gomorrense	20	18	16	12	14	10	2	2	6	4	4	2	2	0	2	0	0	0	6	6	4	2	4	24	8	8	0	10	10	8	2	4	4	0	0	2	216
d__Archaea	k__unclassified_d__Archaea	p__Euryarchaeota	c__Halobacteria	o__Haloferacales	f__Haloferacaceae	g__Halobaculum	s__Halobaculum_halophilum	46	56	34	80	84	96	122	116	92	84	110	84	136	102	84	66	40	140	62	42	38	70	46	32	110	90	86	76	82	74	114	96	106	124	128	140	3088
d__Archaea	k__unclassified_d__Archaea	p__Euryarchaeota	c__Halobacteria	o__Haloferacales	f__Haloferacaceae	g__Halobaculum	s__Halobaculum_magnesiiphilum	0	0	0	6	4	6	2	4	4	6	16	4	4	0	0	6	14	2	0	6	6	2	18	56	6	2	2	0	0	4	0	0	0	0	2	0	182
d__Archaea	k__unclassified_d__Archaea	p__Euryarchaeota	c__Halobacteria	o__Haloferacales	f__Haloferacaceae	g__Halobaculum	s__Halobaculum_roseum	0	0	0	0	6	4	4	6	0	8	0	6	0	2	4	0	0	0	10	10	36	38	2	4	2	4	0	6	16	8	118	68	80	140	142	106	830
d__Archaea	k__unclassified_d__Archaea	p__Euryarchaeota	c__Halobacteria	o__Haloferacales	f__Haloferacaceae	g__Halobaculum	s__Halobaculum_rubrum	12	4	6	2	2	2	0	0	2	0	2	0	12	4	2	8	0	8	0	0	0	4	6	12	6	6	10	10	20	10	0	2	0	0	0	2	154
d__Archaea	k__unclassified_d__Archaea	p__Euryarchaeota	c__Halobacteria	o__Haloferacales	f__Haloferacaceae	g__Halobaculum	s__Halobaculum_salinum	58	42	48	60	52	72	92	68	54	66	90	52	98	68	92	42	40	34	34	42	24	46	50	20	62	52	54	54	42	44	70	64	102	64	92	78	2122
d__Archaea	k__unclassified_d__Archaea	p__Euryarchaeota	c__Halobacteria	o__Haloferacales	f__Haloferacaceae	g__Halobaculum	s__Halobaculum_saliterrae	0	0	0	34	38	20	42	46	32	22	34	22	4	14	12	6	0	8	14	8	12	8	34	18	2	8	16	4	8	8	4	0	2	0	0	0	480
d__Archaea	k__unclassified_d__Archaea	p__Euryarchaeota	c__Halobacteria	o__Haloferacales	f__Haloferacaceae	g__Halobaculum	s__Halobaculum_sp.	0	0	0	0	0	0	0	0	0	0	0	0	0	0	0	0	0	0	0	0	0	2	0	0	0	0	0	0	0	0	0	0	0	0	0	0	2
d__Archaea	k__unclassified_d__Archaea	p__Euryarchaeota	c__Halobacteria	o__Haloferacales	f__Haloferacaceae	g__Halobaculum	s__Halobaculum_sp._CBA1158	8	10	12	22	10	26	16	20	12	20	12	16	8	4	2	10	0	4	0	0	0	6	0	18	2	0	0	6	0	0	0	4	0	0	0	0	248
d__Archaea	k__unclassified_d__Archaea	p__Euryarchaeota	c__Halobacteria	o__Haloferacales	f__Haloferacaceae	g__Halobaculum	s__Halobaculum_sp._DT31	4	12	6	14	16	12	28	16	14	22	22	20	46	12	20	0	18	4	6	12	12	24	26	16	28	40	24	18	26	32	14	4	4	6	6	24	608
d__Archaea	k__unclassified_d__Archaea	p__Euryarchaeota	c__Halobacteria	o__Haloferacales	f__Haloferacaceae	g__Halobaculum	s__Halobaculum_sp._DT55	124	70	80	74	58	78	108	58	104	86	86	48	22	42	22	22	4	28	36	20	46	78	24	42	44	38	72	30	12	18	26	56	22	18	32	16	1744
d__Archaea	k__unclassified_d__Archaea	p__Euryarchaeota	c__Halobacteria	o__Haloferacales	f__Haloferacaceae	g__Halobaculum	s__Halobaculum_sp._DT92	16	36	12	12	2	20	12	16	36	4	20	20	2	6	12	6	6	10	26	24	26	20	24	12	32	28	50	38	32	40	4	6	4	4	0	16	634
d__Archaea	k__unclassified_d__Archaea	p__Euryarchaeota	c__Halobacteria	o__Haloferacales	f__Haloferacaceae	g__Halobaculum	s__Halobaculum_sp._SYNS20	6	8	14	8	4	0	4	12	2	2	4	4	0	6	0	0	20	6	2	20	18	16	10	18	22	34	28	24	32	26	0	0	0	0	0	0	350
d__Archaea	k__unclassified_d__Archaea	p__Euryarchaeota	c__Halobacteria	o__Haloferacales	f__Haloferacaceae	g__Halobaculum	s__Halobaculum_sp._YSMS11	30	34	14	30	32	68	42	80	36	64	68	74	104	92	80	82	36	58	32	18	22	22	14	16	92	50	54	70	70	80	26	28	38	24	28	18	1726
d__Archaea	k__unclassified_d__Archaea	p__Euryarchaeota	c__Halobacteria	o__Haloferacales	f__Haloferacaceae	g__Halobellus	s__Halobellus_captivus	18	30	16	50	74	58	64	94	36	152	116	130	24	10	4	14	10	30	6	16	24	36	10	8	26	46	44	6	46	32	34	38	34	32	30	58	1456
d__Archaea	k__unclassified_d__Archaea	p__Euryarchaeota	c__Halobacteria	o__Haloferacales	f__Haloferacaceae	g__Halobellus	s__Halobellus_clavatus	22	34	12	22	32	12	22	20	18	18	22	16	10	14	6	8	18	4	42	26	60	38	42	36	62	26	36	20	28	36	126	62	66	116	112	62	1306
d__Archaea	k__unclassified_d__Archaea	p__Euryarchaeota	c__Halobacteria	o__Haloferacales	f__Haloferacaceae	g__Halobellus	s__Halobellus_inordinatus	0	10	10	26	12	32	40	30	10	20	14	18	14	14	2	4	0	4	6	14	10	2	2	0	0	12	6	2	0	4	4	0	0	0	2	6	330
d__Archaea	k__unclassified_d__Archaea	p__Euryarchaeota	c__Halobacteria	o__Haloferacales	f__Haloferacaceae	g__Halobellus	s__Halobellus_limi	20	26	20	54	36	36	42	34	38	42	46	34	26	8	18	12	4	8	12	14	30	20	52	28	74	74	56	44	34	66	22	20	46	22	18	18	1154
d__Archaea	k__unclassified_d__Archaea	p__Euryarchaeota	c__Halobacteria	o__Haloferacales	f__Haloferacaceae	g__Halobellus	s__Halobellus_litoreus	24	10	10	58	80	84	82	84	82	86	82	80	52	90	54	34	32	32	18	8	22	16	38	12	84	86	48	102	96	136	52	34	26	58	46	36	1974
d__Archaea	k__unclassified_d__Archaea	p__Euryarchaeota	c__Halobacteria	o__Haloferacales	f__Haloferacaceae	g__Halobellus	s__Halobellus_ramosii	0	0	0	0	0	0	0	0	0	0	0	0	0	0	0	0	0	0	2	0	2	16	2	0	0	0	0	0	0	0	0	0	0	0	0	0	22
d__Archaea	k__unclassified_d__Archaea	p__Euryarchaeota	c__Halobacteria	o__Haloferacales	f__Haloferacaceae	g__Halobellus	s__Halobellus_rarus	6	6	4	4	22	32	30	26	32	18	8	38	10	12	14	4	6	4	2	0	10	2	6	4	4	0	0	0	0	6	14	4	4	0	6	16	354
d__Archaea	k__unclassified_d__Archaea	p__Euryarchaeota	c__Halobacteria	o__Haloferacales	f__Haloferacaceae	g__Halobellus	s__Halobellus_ruber	12	14	16	52	48	30	22	32	26	24	50	26	20	10	12	0	12	10	8	4	14	4	2	10	4	8	4	2	4	8	30	8	10	26	4	16	582
d__Archaea	k__unclassified_d__Archaea	p__Euryarchaeota	c__Halobacteria	o__Haloferacales	f__Haloferacaceae	g__Halobellus	s__Halobellus_rufus	2	0	12	24	28	36	38	64	38	74	50	44	18	2	10	4	2	14	22	6	6	4	4	10	50	48	50	26	20	20	10	12	14	12	2	8	784
d__Archaea	k__unclassified_d__Archaea	p__Euryarchaeota	c__Halobacteria	o__Haloferacales	f__Haloferacaceae	g__Halobellus	s__Halobellus_salinus	0	0	0	0	0	4	4	4	6	4	4	2	2	8	0	0	0	0	14	6	6	0	0	24	4	4	2	12	0	12	0	6	0	2	6	2	138
d__Archaea	k__unclassified_d__Archaea	p__Euryarchaeota	c__Halobacteria	o__Haloferacales	f__Haloferacaceae	g__Halobellus	s__Halobellus_sp.	56	22	26	0	0	0	2	0	0	0	10	0	0	0	0	0	0	0	0	0	0	0	0	0	0	0	0	0	0	0	0	0	0	0	0	0	116
d__Archaea	k__unclassified_d__Archaea	p__Euryarchaeota	c__Halobacteria	o__Haloferacales	f__Haloferacaceae	g__Halobellus	s__Halobellus_sp._Atlit-31R	28	46	48	66	40	50	48	74	74	56	64	74	84	112	66	22	28	40	42	20	8	80	48	14	58	44	54	48	52	64	118	94	138	150	130	90	2272
d__Archaea	k__unclassified_d__Archaea	p__Euryarchaeota	c__Halobacteria	o__Haloferacales	f__Haloferacaceae	g__Halobellus	s__Halobellus_sp._Atlit-38R	0	2	0	8	24	12	2	10	6	14	4	4	8	2	4	0	0	0	10	8	14	8	4	14	8	18	16	12	20	30	14	0	2	4	4	4	290
d__Archaea	k__unclassified_d__Archaea	p__Euryarchaeota	c__Halobacteria	o__Haloferacales	f__Haloferacaceae	g__Halobium	s__Halobium_salinum	56	22	44	80	80	82	76	58	58	82	82	94	86	42	60	50	40	30	42	36	42	30	62	24	40	16	20	42	26	48	22	38	62	46	38	54	1810
d__Archaea	k__unclassified_d__Archaea	p__Euryarchaeota	c__Halobacteria	o__Haloferacales	f__Haloferacaceae	g__Haloferax	s__Haloferax_alexandrinus	26	24	10	16	6	0	2	2	2	8	8	28	20	16	0	10	2	8	14	6	6	28	2	2	14	12	8	8	20	22	6	10	12	2	8	4	372
d__Archaea	k__unclassified_d__Archaea	p__Euryarchaeota	c__Halobacteria	o__Haloferacales	f__Haloferacaceae	g__Haloferax	s__Haloferax_denitrificans	12	12	4	26	24	20	24	20	18	26	42	28	50	50	46	30	16	18	54	42	38	58	18	50	44	16	18	98	50	150	12	22	20	14	20	16	1206
d__Archaea	k__unclassified_d__Archaea	p__Euryarchaeota	c__Halobacteria	o__Haloferacales	f__Haloferacaceae	g__Haloferax	s__Haloferax_elongans	30	22	26	2	4	8	20	8	18	10	6	2	16	18	10	0	0	6	4	4	18	14	16	26	32	32	24	30	16	48	10	16	12	28	30	22	588
d__Archaea	k__unclassified_d__Archaea	p__Euryarchaeota	c__Halobacteria	o__Haloferacales	f__Haloferacaceae	g__Haloferax	s__Haloferax_gibbonsii	10	8	18	68	38	54	56	56	96	74	68	70	34	48	20	12	12	28	28	30	56	54	42	26	70	76	72	66	88	72	28	8	14	18	10	14	1542
d__Archaea	k__unclassified_d__Archaea	p__Euryarchaeota	c__Halobacteria	o__Haloferacales	f__Haloferacaceae	g__Haloferax	s__Haloferax_larsenii	270	122	208	132	88	178	150	188	190	154	178	158	162	116	52	80	46	76	98	56	70	42	46	86	46	62	28	16	42	52	88	72	84	80	86	94	3696
d__Archaea	k__unclassified_d__Archaea	p__Euryarchaeota	c__Halobacteria	o__Haloferacales	f__Haloferacaceae	g__Haloferax	s__Haloferax_lucentense	0	2	4	8	4	2	0	0	8	4	2	2	20	2	6	14	2	4	8	8	0	26	0	2	6	4	2	2	4	4	20	6	8	14	18	18	234
d__Archaea	k__unclassified_d__Archaea	p__Euryarchaeota	c__Halobacteria	o__Haloferacales	f__Haloferacaceae	g__Haloferax	s__Haloferax_marinisediminis	0	0	0	0	0	0	0	0	0	0	0	0	0	0	0	0	0	0	0	0	0	6	0	2	0	0	0	0	0	0	0	0	0	0	0	0	8
d__Archaea	k__unclassified_d__Archaea	p__Euryarchaeota	c__Halobacteria	o__Haloferacales	f__Haloferacaceae	g__Haloferax	s__Haloferax_marinum	0	2	0	2	4	2	2	0	2	2	12	6	0	0	0	0	0	0	0	2	2	0	2	0	0	0	0	0	0	0	0	0	0	0	0	0	40
d__Archaea	k__unclassified_d__Archaea	p__Euryarchaeota	c__Halobacteria	o__Haloferacales	f__Haloferacaceae	g__Haloferax	s__Haloferax_marisrubri	2	6	2	22	10	12	8	6	6	18	12	22	40	58	8	38	18	12	16	20	36	22	4	4	12	16	4	0	10	8	8	12	2	6	8	6	494
d__Archaea	k__unclassified_d__Archaea	p__Euryarchaeota	c__Halobacteria	o__Haloferacales	f__Haloferacaceae	g__Haloferax	s__Haloferax_massiliensis	2	0	0	6	6	6	14	6	2	12	14	20	14	26	30	12	22	12	10	6	8	6	10	12	24	32	12	12	10	38	20	48	46	36	24	38	596
d__Archaea	k__unclassified_d__Archaea	p__Euryarchaeota	c__Halobacteria	o__Haloferacales	f__Haloferacaceae	g__Haloferax	s__Haloferax_mediterranei	16	14	10	48	32	40	32	62	26	38	56	38	38	42	28	24	14	24	4	12	4	2	10	2	48	8	18	52	18	48	16	6	4	10	12	8	864
d__Archaea	k__unclassified_d__Archaea	p__Euryarchaeota	c__Halobacteria	o__Haloferacales	f__Haloferacaceae	g__Haloferax	s__Haloferax_mucosum	10	4	4	32	20	16	32	20	22	42	22	46	8	16	4	2	2	4	28	18	10	42	24	20	28	12	34	22	44	36	10	14	30	10	8	8	704
d__Archaea	k__unclassified_d__Archaea	p__Euryarchaeota	c__Halobacteria	o__Haloferacales	f__Haloferacaceae	g__Haloferax	s__Haloferax_prahovense	0	0	0	0	0	0	0	0	0	0	0	0	0	0	0	0	0	0	4	0	6	2	2	18	0	0	0	18	6	2	0	0	0	0	0	0	58
d__Archaea	k__unclassified_d__Archaea	p__Euryarchaeota	c__Halobacteria	o__Haloferacales	f__Haloferacaceae	g__Haloferax	s__Haloferax_profundi	54	38	52	104	116	142	118	88	114	84	86	106	188	152	122	98	82	108	112	86	118	176	58	72	276	232	238	104	146	166	86	120	102	90	92	108	4234
d__Archaea	k__unclassified_d__Archaea	p__Euryarchaeota	c__Halobacteria	o__Haloferacales	f__Haloferacaceae	g__Haloferax	s__Haloferax_sp.	1764	1246	1298	2516	2200	3012	2814	2838	3278	2812	3122	2686	2606	1990	1580	1188	832	1372	1918	1784	2436	2350	1628	1710	2824	2762	2622	2112	2398	3104	2292	2214	1934	2108	2276	2184	79810
d__Archaea	k__unclassified_d__Archaea	p__Euryarchaeota	c__Halobacteria	o__Haloferacales	f__Haloferacaceae	g__Haloferax	s__Haloferax_sp._AB510	40	20	18	12	28	16	18	34	34	26	22	38	42	60	42	24	20	18	4	0	2	0	10	12	0	6	2	4	0	2	6	14	8	8	8	6	604
d__Archaea	k__unclassified_d__Archaea	p__Euryarchaeota	c__Halobacteria	o__Haloferacales	f__Haloferacaceae	g__Haloferax	s__Haloferax_sp._AS1	0	0	0	0	0	0	0	0	0	0	0	0	0	0	0	0	0	0	0	4	0	6	0	0	2	0	0	0	0	0	0	0	0	0	0	0	12
d__Archaea	k__unclassified_d__Archaea	p__Euryarchaeota	c__Halobacteria	o__Haloferacales	f__Haloferacaceae	g__Haloferax	s__Haloferax_sp._ATB1	2	0	0	26	4	22	30	14	16	24	18	8	24	14	16	2	8	14	8	6	36	8	2	0	46	50	30	32	12	36	2	0	0	2	2	0	514
d__Archaea	k__unclassified_d__Archaea	p__Euryarchaeota	c__Halobacteria	o__Haloferacales	f__Haloferacaceae	g__Haloferax	s__Haloferax_sp._ATCC_BAA-646	0	0	0	2	6	0	6	2	4	2	8	2	4	0	2	12	2	6	0	2	2	2	0	0	0	0	0	0	2	0	2	0	0	0	0	2	70
d__Archaea	k__unclassified_d__Archaea	p__Euryarchaeota	c__Halobacteria	o__Haloferacales	f__Haloferacaceae	g__Haloferax	s__Haloferax_sp._Atlit-10N	0	0	0	0	0	0	0	0	0	0	0	0	2	4	0	2	8	2	0	0	0	0	0	0	0	0	0	0	0	0	0	0	0	0	0	0	18
d__Archaea	k__unclassified_d__Archaea	p__Euryarchaeota	c__Halobacteria	o__Haloferacales	f__Haloferacaceae	g__Haloferax	s__Haloferax_sp._Atlit-12N	8	12	0	14	26	16	12	14	16	28	14	18	4	0	0	0	0	4	2	2	2	14	8	10	42	34	42	38	32	36	0	0	2	4	0	0	454
d__Archaea	k__unclassified_d__Archaea	p__Euryarchaeota	c__Halobacteria	o__Haloferacales	f__Haloferacaceae	g__Haloferax	s__Haloferax_sp._Atlit-19N	0	0	0	0	0	2	4	0	0	0	0	10	0	0	0	0	0	2	0	6	2	0	2	2	2	0	0	2	4	4	0	2	0	0	2	0	46
d__Archaea	k__unclassified_d__Archaea	p__Euryarchaeota	c__Halobacteria	o__Haloferacales	f__Haloferacaceae	g__Haloferax	s__Haloferax_sp._Atlit-47N	8	0	0	2	0	0	0	0	0	0	0	0	0	0	12	0	0	0	0	0	0	0	0	0	0	0	0	0	0	0	0	0	0	0	0	0	22
d__Archaea	k__unclassified_d__Archaea	p__Euryarchaeota	c__Halobacteria	o__Haloferacales	f__Haloferacaceae	g__Haloferax	s__Haloferax_sp._Atlit-4N	6	0	6	28	6	6	14	22	36	22	20	10	8	20	12	4	0	4	0	0	0	0	2	0	6	2	2	26	14	36	2	2	0	0	6	0	322
d__Archaea	k__unclassified_d__Archaea	p__Euryarchaeota	c__Halobacteria	o__Haloferacales	f__Haloferacaceae	g__Haloferax	s__Haloferax_sp._Atlit-6N	6	2	6	16	8	6	10	22	12	22	6	6	4	2	0	8	0	2	4	2	0	0	0	0	4	2	0	6	0	0	10	2	2	4	0	4	178
d__Archaea	k__unclassified_d__Archaea	p__Euryarchaeota	c__Halobacteria	o__Haloferacales	f__Haloferacaceae	g__Haloferax	s__Haloferax_sp._BAB-2207	0	4	16	4	2	14	6	10	20	8	14	14	24	20	18	8	6	10	20	2	12	4	6	8	6	4	8	2	2	2	2	6	8	14	10	8	322
d__Archaea	k__unclassified_d__Archaea	p__Euryarchaeota	c__Halobacteria	o__Haloferacales	f__Haloferacaceae	g__Haloferax	s__Haloferax_sp._CBA1148	0	0	0	12	2	22	6	8	4	6	8	10	0	2	2	0	0	4	6	2	2	12	8	4	0	0	2	0	0	0	0	0	0	0	2	0	124
d__Archaea	k__unclassified_d__Archaea	p__Euryarchaeota	c__Halobacteria	o__Haloferacales	f__Haloferacaceae	g__Haloferax	s__Haloferax_sp._CBA1149	0	2	0	10	6	0	12	12	4	30	2	6	14	4	12	0	8	2	0	2	4	12	10	2	10	6	2	6	6	2	2	6	6	8	8	6	222
d__Archaea	k__unclassified_d__Archaea	p__Euryarchaeota	c__Halobacteria	o__Haloferacales	f__Haloferacaceae	g__Haloferax	s__Haloferax_sp._CBA1150	80	78	108	246	162	190	274	250	240	210	234	204	248	224	170	126	88	142	332	314	372	384	170	102	662	614	592	530	470	600	340	398	352	364	376	378	10624
d__Archaea	k__unclassified_d__Archaea	p__Euryarchaeota	c__Halobacteria	o__Haloferacales	f__Haloferacaceae	g__Haloferax	s__Haloferax_sp._KTX1	14	16	10	8	8	26	18	20	20	30	18	16	6	20	2	4	0	2	48	20	22	54	28	38	12	16	8	14	34	22	2	2	6	0	2	6	572
d__Archaea	k__unclassified_d__Archaea	p__Euryarchaeota	c__Halobacteria	o__Haloferacales	f__Haloferacaceae	g__Haloferax	s__Haloferax_sp._Q22	14	4	2	12	10	18	14	14	10	14	14	12	0	4	0	0	0	8	0	0	0	0	0	8	0	0	0	0	0	0	4	6	2	8	2	10	190
d__Archaea	k__unclassified_d__Archaea	p__Euryarchaeota	c__Halobacteria	o__Haloferacales	f__Haloferacaceae	g__Haloferax	s__Haloferax_sp._wsp5	0	0	2	0	4	0	2	2	2	0	0	0	2	2	0	0	0	4	2	0	0	0	0	0	0	0	0	0	0	0	2	0	0	0	0	0	24
d__Archaea	k__unclassified_d__Archaea	p__Euryarchaeota	c__Halobacteria	o__Haloferacales	f__Haloferacaceae	g__Haloferax	s__Haloferax_sulfurifontis	16	10	18	26	38	36	28	44	18	24	16	14	34	32	14	38	30	22	6	16	10	36	12	12	44	28	22	32	20	38	12	6	4	4	6	10	776
d__Archaea	k__unclassified_d__Archaea	p__Euryarchaeota	c__Halobacteria	o__Haloferacales	f__Haloferacaceae	g__Haloferax	s__Haloferax_volcanii	16	18	8	12	2	28	14	8	16	8	14	12	16	4	0	8	0	8	6	10	4	14	6	2	12	20	22	6	14	20	6	14	6	4	2	2	362
d__Archaea	k__unclassified_d__Archaea	p__Euryarchaeota	c__Halobacteria	o__Haloferacales	f__Haloferacaceae	g__Halogeometricum	s__Halogeometricum_borinquense	8	8	18	18	10	22	34	20	30	12	20	20	22	16	34	14	14	12	60	48	26	52	30	42	76	44	52	80	58	106	24	14	26	38	22	16	1146
d__Archaea	k__unclassified_d__Archaea	p__Euryarchaeota	c__Halobacteria	o__Haloferacales	f__Haloferacaceae	g__Halogeometricum	s__Halogeometricum_limi	158	46	74	98	58	62	118	94	120	78	116	106	190	148	96	134	132	84	40	22	30	50	38	30	78	58	60	104	82	112	88	84	72	154	130	64	3208
d__Archaea	k__unclassified_d__Archaea	p__Euryarchaeota	c__Halobacteria	o__Haloferacales	f__Haloferacaceae	g__Halogeometricum	s__Halogeometricum_pallidum	86	56	52	68	66	66	70	52	90	76	62	66	130	60	42	62	42	68	30	22	30	50	42	46	82	82	74	32	48	106	36	28	44	34	56	42	2098
d__Archaea	k__unclassified_d__Archaea	p__Euryarchaeota	c__Halobacteria	o__Haloferacales	f__Haloferacaceae	g__Halogeometricum	s__Halogeometricum_rufum	38	38	72	88	74	86	72	90	88	66	64	72	54	46	32	48	20	52	12	12	12	20	26	38	28	8	2	28	18	58	22	14	12	12	30	14	1466
d__Archaea	k__unclassified_d__Archaea	p__Euryarchaeota	c__Halobacteria	o__Haloferacales	f__Haloferacaceae	g__Halogeometricum	s__Halogeometricum_sp._CBA1124	138	54	64	12	20	22	32	32	30	36	34	16	20	30	18	34	12	16	14	30	24	18	18	8	24	28	30	4	24	20	30	30	18	38	40	50	1068
d__Archaea	k__unclassified_d__Archaea	p__Euryarchaeota	c__Halobacteria	o__Haloferacales	f__Haloferacaceae	g__Halogranum	s__Halogranum_amylolyticum	68	44	56	130	108	150	178	192	116	114	124	98	72	126	50	92	54	82	50	26	26	68	50	56	112	154	134	84	108	198	40	38	32	44	46	32	3152
d__Archaea	k__unclassified_d__Archaea	p__Euryarchaeota	c__Halobacteria	o__Haloferacales	f__Haloferacaceae	g__Halogranum	s__Halogranum_gelatinilyticum	38	64	26	50	28	40	34	18	46	54	42	56	30	58	38	54	52	38	62	64	74	42	48	32	140	82	52	222	76	214	14	30	16	32	30	52	2048
d__Archaea	k__unclassified_d__Archaea	p__Euryarchaeota	c__Halobacteria	o__Haloferacales	f__Haloferacaceae	g__Halogranum	s__Halogranum_rubrum	60	24	34	78	136	116	118	100	114	82	132	114	68	112	70	44	56	76	36	36	28	50	24	20	72	60	78	52	26	106	60	48	36	40	66	24	2396
d__Archaea	k__unclassified_d__Archaea	p__Euryarchaeota	c__Halobacteria	o__Haloferacales	f__Haloferacaceae	g__Halogranum	s__Halogranum_salarium	36	66	40	36	38	42	30	46	50	44	40	28	82	28	54	30	22	42	58	34	42	38	14	36	64	88	88	64	64	96	52	72	60	70	58	86	1838
d__Archaea	k__unclassified_d__Archaea	p__Euryarchaeota	c__Halobacteria	o__Haloferacales	f__Haloferacaceae	g__Halogranum	s__Halogranum_sp.	2	0	0	0	0	0	0	0	0	0	4	0	2	4	0	12	4	2	0	0	0	0	0	0	0	0	0	0	0	0	2	2	2	6	8	0	50
d__Archaea	k__unclassified_d__Archaea	p__Euryarchaeota	c__Halobacteria	o__Haloferacales	f__Haloferacaceae	g__Halohasta	s__Halohasta_litchfieldiae	8	4	12	164	140	136	130	232	102	122	124	104	32	26	18	20	2	28	0	2	0	0	0	0	2	0	2	4	2	4	0	0	4	0	0	0	1424
d__Archaea	k__unclassified_d__Archaea	p__Euryarchaeota	c__Halobacteria	o__Haloferacales	f__Haloferacaceae	g__Halohasta	s__Halohasta_litorea	12	20	24	36	26	44	42	22	38	30	38	30	86	78	46	42	36	46	36	24	50	38	10	24	204	198	182	76	70	120	38	56	52	68	74	54	2070
d__Archaea	k__unclassified_d__Archaea	p__Euryarchaeota	c__Halobacteria	o__Haloferacales	f__Haloferacaceae	g__Halohasta	s__Halohasta_sp._GSL13	30	40	14	14	12	20	48	24	40	40	52	26	34	30	12	16	8	14	14	6	10	6	56	32	4	2	8	0	4	10	10	0	8	10	4	2	660
d__Archaea	k__unclassified_d__Archaea	p__Euryarchaeota	c__Halobacteria	o__Haloferacales	f__Haloferacaceae	g__Halolamina	s__Halolamina_litorea	6	12	16	40	18	48	46	56	26	28	40	26	12	14	4	6	8	14	34	22	24	18	20	36	30	36	28	58	42	50	48	42	38	36	32	36	1050
d__Archaea	k__unclassified_d__Archaea	p__Euryarchaeota	c__Halobacteria	o__Haloferacales	f__Haloferacaceae	g__Halolamina	s__Halolamina_pelagica	24	28	20	72	52	46	60	56	58	30	46	46	124	84	60	94	88	82	12	12	12	20	16	22	20	32	30	40	14	64	32	32	28	38	32	34	1560
d__Archaea	k__unclassified_d__Archaea	p__Euryarchaeota	c__Halobacteria	o__Haloferacales	f__Haloferacaceae	g__Halolamina	s__Halolamina_rubra	22	10	12	8	10	8	6	6	12	18	22	16	16	14	0	4	0	10	2	6	4	6	2	4	0	2	0	0	0	0	0	0	0	0	0	0	220
d__Archaea	k__unclassified_d__Archaea	p__Euryarchaeota	c__Halobacteria	o__Haloferacales	f__Haloferacaceae	g__Halolamina	s__Halolamina_salifodinae	4	0	0	0	0	0	0	0	0	0	0	0	2	2	2	2	4	0	0	0	0	0	0	0	0	0	0	0	0	0	0	0	0	0	0	0	16
d__Archaea	k__unclassified_d__Archaea	p__Euryarchaeota	c__Halobacteria	o__Haloferacales	f__Haloferacaceae	g__Halolamina	s__Halolamina_sediminis	2	6	2	46	32	26	26	26	16	20	30	20	8	2	6	8	2	0	2	4	2	12	4	8	6	6	8	6	12	8	2	0	0	0	2	2	362
d__Archaea	k__unclassified_d__Archaea	p__Euryarchaeota	c__Halobacteria	o__Haloferacales	f__Haloferacaceae	g__Halolamina	s__Halolamina_sp.	6	0	0	8	12	12	0	12	12	28	18	24	20	8	2	0	0	6	12	4	2	4	10	14	18	14	0	50	12	26	6	16	6	10	4	8	384
d__Archaea	k__unclassified_d__Archaea	p__Euryarchaeota	c__Halobacteria	o__Haloferacales	f__Haloferacaceae	g__Halolamina	s__Halolamina_sp._CBA1230	8	6	0	26	20	30	24	12	18	8	16	8	24	22	20	32	10	12	4	16	6	6	2	0	20	20	12	10	10	16	16	20	16	10	16	30	526
d__Archaea	k__unclassified_d__Archaea	p__Euryarchaeota	c__Halobacteria	o__Haloferacales	f__Haloferacaceae	g__Halolamina	s__Halolamina_sp._R1-12	0	0	0	8	6	2	0	8	2	6	0	2	2	0	0	0	0	0	0	0	0	2	0	2	2	0	0	0	0	0	0	2	0	0	0	0	44
d__Archaea	k__unclassified_d__Archaea	p__Euryarchaeota	c__Halobacteria	o__Haloferacales	f__Haloferacaceae	g__Halonotius	s__Halonotius_aquaticus	0	0	0	2	0	2	0	0	2	0	2	8	0	22	6	6	8	2	0	0	4	0	0	6	6	4	14	2	4	6	2	0	2	0	2	6	118
d__Archaea	k__unclassified_d__Archaea	p__Euryarchaeota	c__Halobacteria	o__Haloferacales	f__Haloferacaceae	g__Halonotius	s__Halonotius_pteroides	0	10	0	0	0	0	0	10	0	0	0	0	0	2	0	14	8	0	0	0	0	0	0	0	0	0	0	0	0	0	0	2	2	0	0	2	50
d__Archaea	k__unclassified_d__Archaea	p__Euryarchaeota	c__Halobacteria	o__Haloferacales	f__Haloferacaceae	g__Halonotius	s__Halonotius_roseus	0	0	0	18	8	18	4	6	12	6	22	10	2	2	0	0	10	4	10	8	6	92	10	4	0	0	0	0	0	0	2	4	2	0	8	6	274
d__Archaea	k__unclassified_d__Archaea	p__Euryarchaeota	c__Halobacteria	o__Haloferacales	f__Haloferacaceae	g__Halonotius	s__Halonotius_sp._J07HN4	0	4	6	0	0	0	0	0	0	0	0	0	0	0	0	0	0	0	0	0	0	0	0	0	0	4	14	14	0	0	0	0	0	0	0	2	44
d__Archaea	k__unclassified_d__Archaea	p__Euryarchaeota	c__Halobacteria	o__Haloferacales	f__Haloferacaceae	g__Halonotius	s__Halonotius_sp._J07HN6	8	0	4	10	14	16	22	8	28	32	22	18	26	4	12	8	10	10	6	10	4	0	8	4	4	0	8	14	16	6	4	8	10	10	4	6	374
d__Archaea	k__unclassified_d__Archaea	p__Euryarchaeota	c__Halobacteria	o__Haloferacales	f__Haloferacaceae	g__Halonotius	s__Halonotius_terrestris	2	4	2	14	6	14	14	8	18	10	12	14	26	10	8	18	14	26	2	4	6	0	2	4	30	6	8	22	4	16	4	4	4	12	10	8	366
d__Archaea	k__unclassified_d__Archaea	p__Euryarchaeota	c__Halobacteria	o__Haloferacales	f__Haloferacaceae	g__Haloparvum	s__Haloparvum_sedimenti	22	16	24	56	32	66	50	54	80	18	16	42	26	40	22	4	12	12	2	8	4	2	4	0	8	18	16	8	16	26	34	18	14	40	28	26	864
d__Archaea	k__unclassified_d__Archaea	p__Euryarchaeota	c__Halobacteria	o__Haloferacales	f__Haloferacaceae	g__Halopelagius	s__Halopelagius_inordinatus	24	28	24	18	16	26	44	50	38	44	62	32	32	12	12	14	4	18	26	36	14	126	30	26	38	32	26	24	32	28	16	20	18	6	16	30	1042
d__Archaea	k__unclassified_d__Archaea	p__Euryarchaeota	c__Halobacteria	o__Haloferacales	f__Haloferacaceae	g__Halopelagius	s__Halopelagius_longus	36	38	26	52	28	46	40	80	70	62	48	28	58	90	72	32	34	26	24	32	22	22	22	10	84	50	50	36	62	90	154	114	120	134	154	156	2202
d__Archaea	k__unclassified_d__Archaea	p__Euryarchaeota	c__Halobacteria	o__Haloferacales	f__Haloferacaceae	g__Halopenitus	s__Halopenitus_malekzadehii	0	4	0	24	22	20	14	8	12	18	20	14	40	34	26	14	2	14	6	10	18	0	20	2	10	12	4	2	10	2	6	0	0	0	6	0	394
d__Archaea	k__unclassified_d__Archaea	p__Euryarchaeota	c__Halobacteria	o__Haloferacales	f__Haloferacaceae	g__Halopenitus	s__Halopenitus_persicus	30	14	18	44	22	66	72	46	44	44	60	60	46	46	28	42	26	22	18	12	18	6	8	6	16	16	8	20	12	10	4	6	12	14	14	8	938
d__Archaea	k__unclassified_d__Archaea	p__Euryarchaeota	c__Halobacteria	o__Haloferacales	f__Haloferacaceae	g__Halopenitus	s__Halopenitus_sp._POP-27	0	2	0	10	4	16	4	4	14	6	16	20	4	2	14	4	0	2	0	0	0	0	0	2	6	0	0	14	0	4	2	0	8	8	2	10	178
d__Archaea	k__unclassified_d__Archaea	p__Euryarchaeota	c__Halobacteria	o__Haloferacales	f__Haloferacaceae	g__Haloplanus	s__Haloplanus_aerogenes	8	20	4	80	82	44	96	74	84	106	100	78	94	60	48	48	32	60	54	38	60	66	16	32	196	274	282	214	134	322	66	44	56	56	48	60	3136
d__Archaea	k__unclassified_d__Archaea	p__Euryarchaeota	c__Halobacteria	o__Haloferacales	f__Haloferacaceae	g__Haloplanus	s__Haloplanus_natans	22	8	34	60	50	48	66	76	64	70	102	68	28	44	16	34	2	54	2	4	6	16	4	12	22	34	16	2	26	14	14	24	22	26	28	36	1154
d__Archaea	k__unclassified_d__Archaea	p__Euryarchaeota	c__Halobacteria	o__Haloferacales	f__Haloferacaceae	g__Haloplanus	s__Haloplanus_rallus	0	0	0	0	0	0	0	0	0	0	4	6	0	0	0	2	0	6	8	4	0	6	10	10	12	8	14	2	8	6	0	0	0	0	0	0	106
d__Archaea	k__unclassified_d__Archaea	p__Euryarchaeota	c__Halobacteria	o__Haloferacales	f__Haloferacaceae	g__Haloplanus	s__Haloplanus_ruber	16	30	8	30	42	36	44	38	54	52	76	50	114	68	60	32	12	44	12	4	4	2	2	6	22	12	20	28	10	28	8	8	6	14	10	6	1008
d__Archaea	k__unclassified_d__Archaea	p__Euryarchaeota	c__Halobacteria	o__Haloferacales	f__Haloferacaceae	g__Haloplanus	s__Haloplanus_rubicundus	286	178	176	84	58	74	56	124	44	100	78	38	60	20	34	16	2	24	14	36	54	234	36	8	56	68	68	78	50	72	12	10	8	16	10	20	2302
d__Archaea	k__unclassified_d__Archaea	p__Euryarchaeota	c__Halobacteria	o__Haloferacales	f__Haloferacaceae	g__Haloplanus	s__Haloplanus_salinarum	0	0	0	22	12	24	32	24	22	40	26	38	2	0	0	0	0	4	0	0	0	0	2	0	0	0	0	0	0	4	4	0	0	0	0	2	258
d__Archaea	k__unclassified_d__Archaea	p__Euryarchaeota	c__Halobacteria	o__Haloferacales	f__Haloferacaceae	g__Haloplanus	s__Haloplanus_salinus	20	14	4	18	14	16	16	8	28	32	36	34	14	6	0	22	6	16	12	6	8	4	2	8	6	0	0	70	24	58	4	6	4	0	6	6	528
d__Archaea	k__unclassified_d__Archaea	p__Euryarchaeota	c__Halobacteria	o__Haloferacales	f__Haloferacaceae	g__Haloplanus	s__Haloplanus_sp.	2	0	0	4	8	2	18	12	10	22	8	6	6	10	8	8	4	22	10	14	6	22	2	6	18	12	16	24	24	46	10	2	2	4	4	2	374
d__Archaea	k__unclassified_d__Archaea	p__Euryarchaeota	c__Halobacteria	o__Haloferacales	f__Haloferacaceae	g__Haloplanus	s__Haloplanus_sp._GDY1	28	22	12	26	12	30	26	10	16	16	18	6	32	34	14	24	26	14	20	26	50	14	64	24	20	14	34	30	22	34	4	2	4	4	10	12	754
d__Archaea	k__unclassified_d__Archaea	p__Euryarchaeota	c__Halobacteria	o__Haloferacales	f__Haloferacaceae	g__Haloplanus	s__Haloplanus_sp._HW8-1	106	46	68	44	38	40	26	48	40	26	22	18	26	48	8	4	10	18	2	6	0	4	4	2	0	10	8	2	2	8	10	8	4	8	14	18	746
d__Archaea	k__unclassified_d__Archaea	p__Euryarchaeota	c__Halobacteria	o__Haloferacales	f__Haloferacaceae	g__Haloplanus	s__Haloplanus_sp._XH21	20	20	24	12	12	12	14	6	10	8	2	8	14	16	12	18	14	18	42	32	50	18	8	8	26	32	28	8	28	22	12	14	18	20	34	4	644
d__Archaea	k__unclassified_d__Archaea	p__Euryarchaeota	c__Halobacteria	o__Haloferacales	f__Haloferacaceae	g__Haloplanus	s__Haloplanus_vescus	0	0	0	4	14	4	8	10	4	14	10	8	6	0	0	0	0	10	6	0	0	6	6	28	4	2	2	2	0	6	0	2	0	0	0	0	156
d__Archaea	k__unclassified_d__Archaea	p__Euryarchaeota	c__Halobacteria	o__Haloferacales	f__Haloferacaceae	g__Haloprofundus	s__Haloprofundus_halobius	30	10	12	106	82	92	140	102	148	158	198	142	74	46	40	42	24	40	44	48	70	98	38	64	58	62	80	58	72	112	22	16	10	16	30	28	2412
d__Archaea	k__unclassified_d__Archaea	p__Euryarchaeota	c__Halobacteria	o__Haloferacales	f__Haloferacaceae	g__Haloprofundus	s__Haloprofundus_halophilus	2	8	2	4	4	6	4	0	16	6	4	8	2	4	8	4	0	16	42	18	32	24	22	14	22	28	56	30	42	58	10	4	4	6	14	6	530
d__Archaea	k__unclassified_d__Archaea	p__Euryarchaeota	c__Halobacteria	o__Haloferacales	f__Haloferacaceae	g__Haloprofundus	s__Haloprofundus_marisrubri	68	62	64	58	48	68	50	36	82	74	64	50	110	138	146	80	72	74	50	44	36	110	72	28	48	34	44	108	38	80	36	26	30	28	34	58	2248
d__Archaea	k__unclassified_d__Archaea	p__Euryarchaeota	c__Halobacteria	o__Haloferacales	f__Haloferacaceae	g__Haloprofundus	s__Haloprofundus_salilacus	82	24	56	46	44	62	54	56	62	44	40	38	66	70	78	34	32	48	42	36	42	40	48	26	118	160	126	82	96	116	70	76	48	96	82	74	2314
d__Archaea	k__unclassified_d__Archaea	p__Euryarchaeota	c__Halobacteria	o__Haloferacales	f__Haloferacaceae	g__Haloprofundus	s__Haloprofundus_salinisoli	2	12	10	24	22	28	14	10	22	20	34	34	42	38	24	34	38	14	12	14	14	12	10	6	52	54	52	114	94	126	4	2	10	4	8	10	1020
d__Archaea	k__unclassified_d__Archaea	p__Euryarchaeota	c__Halobacteria	o__Haloferacales	f__Haloferacaceae	g__Haloprofundus	s__Haloprofundus_sp.	0	0	0	6	2	2	10	4	0	0	6	4	12	14	8	4	2	0	0	2	0	0	0	20	0	0	0	24	0	12	0	0	2	0	0	0	134
d__Archaea	k__unclassified_d__Archaea	p__Euryarchaeota	c__Halobacteria	o__Haloferacales	f__Haloferacaceae	g__Haloprofundus	s__Haloprofundus_sp._MHR1	2	8	8	54	62	32	42	46	32	50	46	38	24	32	4	20	4	22	4	4	6	8	8	10	8	20	20	20	38	48	0	0	4	2	0	0	726
d__Archaea	k__unclassified_d__Archaea	p__Euryarchaeota	c__Halobacteria	o__Haloferacales	f__Haloferacaceae	g__Haloquadratum	s__Haloquadratum_sp._J07HQX50	16	10	20	0	0	0	0	0	0	0	0	0	0	0	0	0	0	0	0	0	0	0	0	0	0	0	2	2	4	0	0	0	0	2	2	0	58
d__Archaea	k__unclassified_d__Archaea	p__Euryarchaeota	c__Halobacteria	o__Haloferacales	f__Haloferacaceae	g__Haloquadratum	s__Haloquadratum_walsbyi	28	10	28	22	26	16	16	12	20	22	32	24	6	6	2	6	2	10	0	2	0	2	4	8	0	6	2	6	0	4	2	2	2	4	8	0	340
d__Archaea	k__unclassified_d__Archaea	p__Euryarchaeota	c__Halobacteria	o__Haloferacales	f__Haloferacaceae	g__Halorubrum	s__Halorubrum_aethiopicum	20	30	18	6	2	4	2	6	2	6	12	8	80	28	40	26	28	20	4	0	0	0	0	2	0	0	0	0	0	0	2	0	2	2	2	0	352
d__Archaea	k__unclassified_d__Archaea	p__Euryarchaeota	c__Halobacteria	o__Haloferacales	f__Haloferacaceae	g__Halorubrum	s__Halorubrum_aidingense	2	2	10	0	0	4	2	0	12	0	4	8	2	2	0	0	0	0	0	0	0	0	0	0	0	0	0	0	0	0	4	6	6	0	2	2	68
d__Archaea	k__unclassified_d__Archaea	p__Euryarchaeota	c__Halobacteria	o__Haloferacales	f__Haloferacaceae	g__Halorubrum	s__Halorubrum_alkaliphilum	0	0	0	0	2	0	14	4	2	2	6	4	0	4	14	0	0	0	0	2	2	0	0	0	0	0	0	0	0	0	0	0	0	0	0	0	56
d__Archaea	k__unclassified_d__Archaea	p__Euryarchaeota	c__Halobacteria	o__Haloferacales	f__Haloferacaceae	g__Halorubrum	s__Halorubrum_amylolyticum	14	8	8	22	0	2	4	6	6	6	2	2	24	28	30	64	16	38	10	12	26	4	30	10	18	14	24	12	4	30	12	18	6	12	20	6	548
d__Archaea	k__unclassified_d__Archaea	p__Euryarchaeota	c__Halobacteria	o__Haloferacales	f__Haloferacaceae	g__Halorubrum	s__Halorubrum_aquaticum	52	28	28	8	10	4	14	4	4	6	6	14	4	4	8	2	0	0	4	2	2	28	2	12	32	26	22	6	10	4	6	6	2	4	6	6	376
d__Archaea	k__unclassified_d__Archaea	p__Euryarchaeota	c__Halobacteria	o__Haloferacales	f__Haloferacaceae	g__Halorubrum	s__Halorubrum_arcis	0	0	0	10	0	8	20	28	14	6	18	34	0	2	2	0	0	0	2	2	2	0	2	0	0	8	6	30	4	12	4	2	0	10	2	4	232
d__Archaea	k__unclassified_d__Archaea	p__Euryarchaeota	c__Halobacteria	o__Haloferacales	f__Haloferacaceae	g__Halorubrum	s__Halorubrum_californiense	0	0	0	2	2	4	2	2	4	8	4	4	0	0	0	0	0	2	2	0	2	0	14	0	0	2	2	0	0	2	0	0	0	0	0	2	60
d__Archaea	k__unclassified_d__Archaea	p__Euryarchaeota	c__Halobacteria	o__Haloferacales	f__Haloferacaceae	g__Halorubrum	s__Halorubrum_cibi	0	4	0	8	8	10	2	2	2	2	6	6	6	8	2	14	12	10	16	2	2	0	10	0	0	6	0	0	2	0	2	0	2	0	2	2	148
d__Archaea	k__unclassified_d__Archaea	p__Euryarchaeota	c__Halobacteria	o__Haloferacales	f__Haloferacaceae	g__Halorubrum	s__Halorubrum_coriense	0	0	0	0	0	0	4	0	0	0	0	0	6	10	6	0	0	8	0	0	2	0	4	0	0	0	0	0	0	0	2	0	0	0	0	0	42
d__Archaea	k__unclassified_d__Archaea	p__Euryarchaeota	c__Halobacteria	o__Haloferacales	f__Haloferacaceae	g__Halorubrum	s__Halorubrum_depositum	4	0	0	2	0	0	2	0	4	0	0	0	0	0	0	0	0	0	6	4	0	2	4	0	14	0	0	76	36	34	6	0	0	8	4	2	208
d__Archaea	k__unclassified_d__Archaea	p__Euryarchaeota	c__Halobacteria	o__Haloferacales	f__Haloferacaceae	g__Halorubrum	s__Halorubrum_distributum	6	8	8	6	12	12	0	0	6	14	6	0	18	18	18	8	12	12	4	4	2	6	0	0	10	18	10	2	12	6	4	2	2	0	0	0	246
d__Archaea	k__unclassified_d__Archaea	p__Euryarchaeota	c__Halobacteria	o__Haloferacales	f__Haloferacaceae	g__Halorubrum	s__Halorubrum_ezzemoulense	16	16	26	104	58	72	60	60	56	108	84	80	114	112	32	44	42	36	22	6	38	40	4	16	46	44	46	106	84	74	56	34	60	54	50	70	1970
d__Archaea	k__unclassified_d__Archaea	p__Euryarchaeota	c__Halobacteria	o__Haloferacales	f__Haloferacaceae	g__Halorubrum	s__Halorubrum_halodurans	12	4	2	4	0	0	2	0	8	10	8	0	0	2	2	4	0	6	10	2	6	4	2	2	0	0	0	0	0	2	0	8	2	2	0	4	108
d__Archaea	k__unclassified_d__Archaea	p__Euryarchaeota	c__Halobacteria	o__Haloferacales	f__Haloferacaceae	g__Halorubrum	s__Halorubrum_halophilum	6	4	6	20	16	22	4	16	2	16	26	12	10	14	4	6	0	12	22	6	6	10	14	8	0	0	0	0	0	0	8	8	2	8	12	6	306
d__Archaea	k__unclassified_d__Archaea	p__Euryarchaeota	c__Halobacteria	o__Haloferacales	f__Haloferacaceae	g__Halorubrum	s__Halorubrum_kocurii	4	0	8	24	10	6	8	14	8	4	8	2	0	2	0	0	0	4	16	12	24	12	12	14	2	2	4	4	8	6	4	2	2	0	0	0	226
d__Archaea	k__unclassified_d__Archaea	p__Euryarchaeota	c__Halobacteria	o__Haloferacales	f__Haloferacaceae	g__Halorubrum	s__Halorubrum_lacusprofundi	4	4	6	14	12	6	4	6	14	4	32	6	2	2	0	4	0	2	0	0	0	6	0	0	0	0	0	2	2	0	10	2	0	0	6	12	162
d__Archaea	k__unclassified_d__Archaea	p__Euryarchaeota	c__Halobacteria	o__Haloferacales	f__Haloferacaceae	g__Halorubrum	s__Halorubrum_laminariae	0	2	0	6	2	6	6	8	0	6	10	6	14	4	0	12	6	16	2	6	2	0	2	6	0	2	4	0	0	4	12	4	12	18	10	8	196
d__Archaea	k__unclassified_d__Archaea	p__Euryarchaeota	c__Halobacteria	o__Haloferacales	f__Haloferacaceae	g__Halorubrum	s__Halorubrum_lipolyticum	12	8	2	14	26	12	22	8	24	20	26	16	6	4	0	2	2	0	2	2	6	0	2	2	2	0	2	2	2	6	2	2	0	0	2	0	238
d__Archaea	k__unclassified_d__Archaea	p__Euryarchaeota	c__Halobacteria	o__Haloferacales	f__Haloferacaceae	g__Halorubrum	s__Halorubrum_litoreum	0	0	0	0	0	0	0	0	0	0	0	0	0	0	0	0	0	0	0	0	0	0	0	0	6	0	0	2	2	16	0	0	0	2	0	0	28
d__Archaea	k__unclassified_d__Archaea	p__Euryarchaeota	c__Halobacteria	o__Haloferacales	f__Haloferacaceae	g__Halorubrum	s__Halorubrum_persicum	0	0	0	4	4	8	0	0	0	0	2	0	2	0	0	4	4	0	2	2	0	0	0	0	0	2	0	0	2	0	0	0	0	0	0	4	40
d__Archaea	k__unclassified_d__Archaea	p__Euryarchaeota	c__Halobacteria	o__Haloferacales	f__Haloferacaceae	g__Halorubrum	s__Halorubrum_rubrum	8	0	6	0	0	0	0	0	0	0	0	4	0	6	8	0	12	0	6	12	18	8	2	2	12	30	18	18	12	14	0	2	4	2	8	2	214
d__Archaea	k__unclassified_d__Archaea	p__Euryarchaeota	c__Halobacteria	o__Haloferacales	f__Haloferacaceae	g__Halorubrum	s__Halorubrum_rutilum	0	0	0	0	0	0	0	0	0	0	0	0	0	0	0	0	0	0	2	8	22	12	2	0	4	10	22	0	8	12	0	0	0	0	0	0	102
d__Archaea	k__unclassified_d__Archaea	p__Euryarchaeota	c__Halobacteria	o__Haloferacales	f__Haloferacaceae	g__Halorubrum	s__Halorubrum_saccharovorum	2	0	0	16	22	22	8	10	14	4	10	8	14	6	0	12	6	0	8	4	2	0	0	2	2	2	2	2	2	6	2	2	0	6	4	4	204
d__Archaea	k__unclassified_d__Archaea	p__Euryarchaeota	c__Halobacteria	o__Haloferacales	f__Haloferacaceae	g__Halorubrum	s__Halorubrum_salinarum	0	0	0	2	0	0	0	0	0	0	2	0	0	0	0	0	0	0	0	0	0	0	0	6	0	0	0	0	0	0	0	0	0	0	0	0	10
d__Archaea	k__unclassified_d__Archaea	p__Euryarchaeota	c__Halobacteria	o__Haloferacales	f__Haloferacaceae	g__Halorubrum	s__Halorubrum_salinum	0	0	2	0	0	0	0	0	0	0	0	0	4	2	0	0	10	2	0	2	0	0	0	0	2	0	0	0	4	0	0	0	0	0	0	0	28
d__Archaea	k__unclassified_d__Archaea	p__Euryarchaeota	c__Halobacteria	o__Haloferacales	f__Haloferacaceae	g__Halorubrum	s__Halorubrum_salipaludis	56	8	34	0	0	0	0	0	0	0	0	0	0	0	0	0	0	2	6	2	4	16	6	2	8	2	2	8	4	4	0	0	0	0	0	0	164
d__Archaea	k__unclassified_d__Archaea	p__Euryarchaeota	c__Halobacteria	o__Haloferacales	f__Haloferacaceae	g__Halorubrum	s__Halorubrum_salsamenti	16	10	14	38	68	96	96	50	128	76	88	86	48	50	60	34	32	58	6	10	28	8	8	2	38	28	30	36	14	42	22	28	24	24	8	26	1430
d__Archaea	k__unclassified_d__Archaea	p__Euryarchaeota	c__Halobacteria	o__Haloferacales	f__Haloferacaceae	g__Halorubrum	s__Halorubrum_sodomense	0	0	0	2	0	6	6	16	0	8	12	4	0	0	0	0	0	0	0	0	0	0	6	0	0	0	2	0	0	0	0	0	0	0	0	0	62
d__Archaea	k__unclassified_d__Archaea	p__Euryarchaeota	c__Halobacteria	o__Haloferacales	f__Haloferacaceae	g__Halorubrum	s__Halorubrum_sp.	236	154	168	18	12	22	14	16	22	18	30	16	66	46	22	62	48	20	38	40	46	90	36	30	54	58	76	60	98	98	80	56	70	68	90	68	2146
d__Archaea	k__unclassified_d__Archaea	p__Euryarchaeota	c__Halobacteria	o__Haloferacales	f__Haloferacaceae	g__Halorubrum	s__Halorubrum_sp._2020YC2	0	0	18	4	4	12	6	0	4	10	6	0	6	0	0	0	0	0	2	0	6	2	2	0	10	6	8	16	22	12	0	0	0	0	0	2	158
d__Archaea	k__unclassified_d__Archaea	p__Euryarchaeota	c__Halobacteria	o__Haloferacales	f__Haloferacaceae	g__Halorubrum	s__Halorubrum_sp._48-1-W	0	2	0	0	2	2	2	4	8	14	6	10	10	0	6	4	4	0	8	2	10	12	36	18	16	10	12	18	26	20	0	2	6	2	0	0	272
d__Archaea	k__unclassified_d__Archaea	p__Euryarchaeota	c__Halobacteria	o__Haloferacales	f__Haloferacaceae	g__Halorubrum	s__Halorubrum_sp._AJ67	4	10	4	0	0	0	2	0	0	0	0	6	2	4	8	0	2	0	2	2	10	2	4	0	0	0	0	0	2	0	8	8	8	2	2	2	94
d__Archaea	k__unclassified_d__Archaea	p__Euryarchaeota	c__Halobacteria	o__Haloferacales	f__Haloferacaceae	g__Halorubrum	s__Halorubrum_sp._ASP1	0	0	0	10	12	34	28	32	52	28	26	26	12	16	14	4	0	4	0	0	0	0	0	8	14	6	4	22	2	34	2	2	0	12	0	0	404
d__Archaea	k__unclassified_d__Archaea	p__Euryarchaeota	c__Halobacteria	o__Haloferacales	f__Haloferacaceae	g__Halorubrum	s__Halorubrum_sp._ASP121	14	16	16	10	20	8	4	10	2	6	8	10	10	2	8	12	20	14	14	4	26	12	12	16	24	30	22	12	18	18	12	18	10	10	0	10	458
d__Archaea	k__unclassified_d__Archaea	p__Euryarchaeota	c__Halobacteria	o__Haloferacales	f__Haloferacaceae	g__Halorubrum	s__Halorubrum_sp._Atlit-26R	2	0	4	30	50	32	16	26	10	38	24	14	18	30	6	38	32	26	6	4	8	0	6	2	16	8	14	4	2	2	8	10	6	8	6	14	520
d__Archaea	k__unclassified_d__Archaea	p__Euryarchaeota	c__Halobacteria	o__Haloferacales	f__Haloferacaceae	g__Halorubrum	s__Halorubrum_sp._Atlit-28R	8	8	16	6	6	4	12	0	10	4	8	2	16	4	10	6	32	4	4	2	6	0	4	4	16	12	20	12	16	48	2	4	6	4	18	6	340
d__Archaea	k__unclassified_d__Archaea	p__Euryarchaeota	c__Halobacteria	o__Haloferacales	f__Haloferacaceae	g__Halorubrum	s__Halorubrum_sp._Atlit-9R	0	0	0	6	20	18	6	0	2	16	20	6	2	0	2	2	4	6	0	0	0	0	0	0	0	0	0	0	0	2	0	0	0	0	0	0	112
d__Archaea	k__unclassified_d__Archaea	p__Euryarchaeota	c__Halobacteria	o__Haloferacales	f__Haloferacaceae	g__Halorubrum	s__Halorubrum_sp._BOL3-1	0	4	4	0	0	2	2	6	2	0	0	0	0	4	0	0	0	0	0	0	6	2	0	2	6	0	8	6	4	16	2	0	0	0	0	2	78
d__Archaea	k__unclassified_d__Archaea	p__Euryarchaeota	c__Halobacteria	o__Haloferacales	f__Haloferacaceae	g__Halorubrum	s__Halorubrum_sp._BV1	0	0	0	6	2	0	2	0	0	16	6	2	6	10	0	4	12	2	2	0	4	0	0	0	0	4	0	0	0	6	2	4	8	0	0	0	98
d__Archaea	k__unclassified_d__Archaea	p__Euryarchaeota	c__Halobacteria	o__Haloferacales	f__Haloferacaceae	g__Halorubrum	s__Halorubrum_sp._Boch-26	4	0	10	2	2	0	0	0	0	0	14	2	0	0	0	0	0	0	0	0	0	0	0	0	0	10	8	2	2	4	0	0	0	0	0	0	60
d__Archaea	k__unclassified_d__Archaea	p__Euryarchaeota	c__Halobacteria	o__Haloferacales	f__Haloferacaceae	g__Halorubrum	s__Halorubrum_sp._C191	0	0	0	0	0	0	0	0	0	0	0	0	0	0	0	0	0	0	8	10	0	0	4	0	0	2	2	0	0	0	0	0	0	2	4	2	34
d__Archaea	k__unclassified_d__Archaea	p__Euryarchaeota	c__Halobacteria	o__Haloferacales	f__Haloferacaceae	g__Halorubrum	s__Halorubrum_sp._C3	20	4	8	12	0	0	8	4	0	0	4	0	2	0	2	0	0	2	6	2	4	0	4	4	16	8	4	4	14	10	14	8	8	4	4	2	182
d__Archaea	k__unclassified_d__Archaea	p__Euryarchaeota	c__Halobacteria	o__Haloferacales	f__Haloferacaceae	g__Halorubrum	s__Halorubrum_sp._CBA1125	8	2	4	36	20	20	48	40	32	38	32	26	20	26	12	32	10	26	2	2	2	2	18	10	2	4	0	14	8	16	16	28	18	14	16	12	616
d__Archaea	k__unclassified_d__Archaea	p__Euryarchaeota	c__Halobacteria	o__Haloferacales	f__Haloferacaceae	g__Halorubrum	s__Halorubrum_sp._CBA1229	8	2	2	6	10	2	0	4	4	4	8	0	0	0	0	0	0	0	2	0	0	0	0	0	2	6	4	6	4	6	4	12	0	2	6	2	106
d__Archaea	k__unclassified_d__Archaea	p__Euryarchaeota	c__Halobacteria	o__Haloferacales	f__Haloferacaceae	g__Halorubrum	s__Halorubrum_sp._CGM4_25_10-8A	0	0	0	0	0	6	2	6	0	4	2	0	0	0	0	0	0	0	0	0	0	0	0	0	4	0	0	2	0	2	0	0	0	0	0	0	28
d__Archaea	k__unclassified_d__Archaea	p__Euryarchaeota	c__Halobacteria	o__Haloferacales	f__Haloferacaceae	g__Halorubrum	s__Halorubrum_sp._CGM5_25_10-8B	0	0	0	0	0	6	0	0	0	4	0	0	0	0	0	0	0	0	4	8	4	0	0	0	6	12	6	2	2	0	0	0	0	0	0	0	54
d__Archaea	k__unclassified_d__Archaea	p__Euryarchaeota	c__Halobacteria	o__Haloferacales	f__Haloferacaceae	g__Halorubrum	s__Halorubrum_sp._CSM-61	0	0	0	12	2	8	6	0	10	6	8	16	0	0	0	0	0	8	0	0	6	0	0	4	0	0	0	0	0	0	0	2	2	2	0	10	102
d__Archaea	k__unclassified_d__Archaea	p__Euryarchaeota	c__Halobacteria	o__Haloferacales	f__Haloferacaceae	g__Halorubrum	s__Halorubrum_sp._DM2	0	2	0	12	18	2	0	6	4	10	6	6	12	14	14	4	0	10	2	0	2	2	0	2	2	0	2	0	6	0	6	0	0	0	2	0	146
d__Archaea	k__unclassified_d__Archaea	p__Euryarchaeota	c__Halobacteria	o__Haloferacales	f__Haloferacaceae	g__Halorubrum	s__Halorubrum_sp._E3	2	2	6	2	0	2	4	0	6	14	6	0	8	2	10	4	12	8	2	2	6	2	0	0	14	2	6	2	4	12	0	0	0	0	0	2	142
d__Archaea	k__unclassified_d__Archaea	p__Euryarchaeota	c__Halobacteria	o__Haloferacales	f__Haloferacaceae	g__Halorubrum	s__Halorubrum_sp._Ea1	0	0	0	10	6	0	12	6	6	2	12	2	0	0	0	0	14	0	2	4	0	4	0	6	28	18	28	22	28	36	2	4	0	2	0	2	256
d__Archaea	k__unclassified_d__Archaea	p__Euryarchaeota	c__Halobacteria	o__Haloferacales	f__Haloferacaceae	g__Halorubrum	s__Halorubrum_sp._Ea8	22	38	26	18	6	24	30	38	26	18	48	32	14	28	38	14	10	20	20	20	18	10	8	14	104	70	60	80	52	66	24	20	40	20	20	22	1118
d__Archaea	k__unclassified_d__Archaea	p__Euryarchaeota	c__Halobacteria	o__Haloferacales	f__Haloferacaceae	g__Halorubrum	s__Halorubrum_sp._Eb13	4	0	0	14	14	28	14	20	28	20	32	30	16	34	12	12	16	10	10	20	22	8	12	8	16	16	10	10	14	28	10	14	10	22	18	18	570
d__Archaea	k__unclassified_d__Archaea	p__Euryarchaeota	c__Halobacteria	o__Haloferacales	f__Haloferacaceae	g__Halorubrum	s__Halorubrum_sp._F4	0	0	0	6	0	2	2	0	0	0	4	2	0	0	0	0	24	0	0	2	6	10	14	2	32	12	4	18	22	44	0	0	0	0	4	2	212
d__Archaea	k__unclassified_d__Archaea	p__Euryarchaeota	c__Halobacteria	o__Haloferacales	f__Haloferacaceae	g__Halorubrum	s__Halorubrum_sp._GN11GM_10-3_MGM	0	0	0	0	0	0	6	4	0	0	0	0	0	0	0	0	0	0	0	0	0	0	0	0	0	0	0	0	0	0	0	0	0	0	0	0	10
d__Archaea	k__unclassified_d__Archaea	p__Euryarchaeota	c__Halobacteria	o__Haloferacales	f__Haloferacaceae	g__Halorubrum	s__Halorubrum_sp._GN11_10-6_MGM	0	0	0	18	12	22	20	48	20	6	18	20	8	2	0	16	0	6	0	8	8	4	20	14	6	6	0	34	4	8	6	0	2	0	0	0	336
d__Archaea	k__unclassified_d__Archaea	p__Euryarchaeota	c__Halobacteria	o__Haloferacales	f__Haloferacaceae	g__Halorubrum	s__Halorubrum_sp._Hd13	2	0	2	16	10	14	12	6	18	18	40	30	6	2	12	2	4	6	4	4	8	0	4	0	6	0	4	6	2	4	8	4	4	0	4	2	264
d__Archaea	k__unclassified_d__Archaea	p__Euryarchaeota	c__Halobacteria	o__Haloferacales	f__Haloferacaceae	g__Halorubrum	s__Halorubrum_sp._Ib24	0	0	0	28	14	20	6	24	4	8	16	24	6	6	6	2	2	4	4	2	0	14	4	6	24	28	24	30	10	54	0	2	4	0	4	2	382
d__Archaea	k__unclassified_d__Archaea	p__Euryarchaeota	c__Halobacteria	o__Haloferacales	f__Haloferacaceae	g__Halorubrum	s__Halorubrum_sp._J07HR59	0	0	0	0	0	0	0	0	2	16	0	2	0	0	0	0	0	0	6	6	8	2	2	0	0	0	2	0	0	0	0	0	0	0	0	0	46
d__Archaea	k__unclassified_d__Archaea	p__Euryarchaeota	c__Halobacteria	o__Haloferacales	f__Haloferacaceae	g__Halorubrum	s__Halorubrum_sp._JWXQ-INN_858	8	6	2	14	18	12	20	18	18	36	10	14	14	18	20	20	12	30	32	34	54	66	10	18	38	30	22	26	16	24	220	182	176	264	304	158	1964
d__Archaea	k__unclassified_d__Archaea	p__Euryarchaeota	c__Halobacteria	o__Haloferacales	f__Haloferacaceae	g__Halorubrum	s__Halorubrum_sp._LN27	2	0	0	24	4	14	8	12	4	2	4	4	6	16	8	10	12	10	2	0	0	0	2	0	0	0	0	0	2	2	6	6	0	6	10	6	182
d__Archaea	k__unclassified_d__Archaea	p__Euryarchaeota	c__Halobacteria	o__Haloferacales	f__Haloferacaceae	g__Halorubrum	s__Halorubrum_sp._PV6	0	0	0	2	2	6	4	2	2	2	8	16	0	2	0	0	0	2	0	0	0	0	0	0	4	2	8	6	6	12	0	0	0	0	0	0	86
d__Archaea	k__unclassified_d__Archaea	p__Euryarchaeota	c__Halobacteria	o__Haloferacales	f__Haloferacaceae	g__Halorubrum	s__Halorubrum_sp._SD612	0	0	0	0	0	0	2	6	4	10	4	2	2	0	0	0	0	0	2	0	0	0	0	0	0	0	0	0	0	0	0	0	0	0	0	0	32
d__Archaea	k__unclassified_d__Archaea	p__Euryarchaeota	c__Halobacteria	o__Haloferacales	f__Haloferacaceae	g__Halorubrum	s__Halorubrum_sp._SD626R	106	70	92	78	102	80	90	82	108	90	98	106	130	132	72	114	94	94	96	94	114	58	72	68	108	114	126	62	126	136	114	106	82	108	94	104	3520
d__Archaea	k__unclassified_d__Archaea	p__Euryarchaeota	c__Halobacteria	o__Haloferacales	f__Haloferacaceae	g__Halorubrum	s__Halorubrum_sp._SD683	0	0	0	2	2	4	6	2	0	0	0	0	0	0	0	2	0	0	0	0	0	0	10	0	0	0	0	0	0	0	0	0	0	0	0	0	28
d__Archaea	k__unclassified_d__Archaea	p__Euryarchaeota	c__Halobacteria	o__Haloferacales	f__Haloferacaceae	g__Halorubrum	s__Halorubrum_sp._SD690R	12	10	0	0	0	0	0	0	0	0	0	0	0	0	0	0	0	0	0	0	0	0	0	0	2	0	0	0	0	0	0	0	0	2	0	2	28
d__Archaea	k__unclassified_d__Archaea	p__Euryarchaeota	c__Halobacteria	o__Haloferacales	f__Haloferacaceae	g__Halorubrum	s__Halorubrum_sp._SP3	0	2	4	14	0	12	14	12	26	0	22	18	4	0	2	0	0	0	14	12	28	10	0	2	14	16	16	2	8	28	10	2	4	6	2	4	308
d__Archaea	k__unclassified_d__Archaea	p__Euryarchaeota	c__Halobacteria	o__Haloferacales	f__Haloferacaceae	g__Halorubrum	s__Halorubrum_sp._SP9	8	12	10	0	0	4	2	2	2	6	2	0	0	0	0	0	10	0	0	0	0	2	0	0	0	0	0	2	0	2	0	0	0	0	0	0	64
d__Archaea	k__unclassified_d__Archaea	p__Euryarchaeota	c__Halobacteria	o__Haloferacales	f__Haloferacaceae	g__Halorubrum	s__Halorubrum_sp._SS5	8	22	8	38	30	24	26	18	34	26	18	12	36	36	30	2	16	12	12	6	10	22	18	40	44	60	44	26	42	66	14	10	24	18	8	14	874
d__Archaea	k__unclassified_d__Archaea	p__Euryarchaeota	c__Halobacteria	o__Haloferacales	f__Haloferacaceae	g__Halorubrum	s__Halorubrum_sp._SS7	2	0	2	0	0	0	0	0	0	0	0	2	12	10	8	16	8	6	0	0	0	0	0	0	0	0	0	0	0	0	4	2	6	4	2	12	96
d__Archaea	k__unclassified_d__Archaea	p__Euryarchaeota	c__Halobacteria	o__Haloferacales	f__Haloferacaceae	g__Halorubrum	s__Halorubrum_sp._T3	6	2	2	0	0	0	0	0	0	6	0	0	6	2	2	6	2	2	0	0	0	0	0	0	0	0	0	0	0	0	2	2	2	2	8	0	52
d__Archaea	k__unclassified_d__Archaea	p__Euryarchaeota	c__Halobacteria	o__Haloferacales	f__Haloferacaceae	g__Halorubrum	s__Halorubrum_terrestre	0	0	2	2	2	8	0	8	2	2	0	0	6	4	2	10	0	12	14	24	4	2	6	2	2	2	0	2	2	0	6	2	2	0	0	0	130
d__Archaea	k__unclassified_d__Archaea	p__Euryarchaeota	c__Halobacteria	o__Haloferacales	f__Haloferacaceae	g__Halorubrum	s__Halorubrum_trapanicum	0	2	4	10	10	8	6	4	6	6	0	4	10	0	4	2	2	2	2	10	10	6	6	16	14	22	46	10	24	22	2	2	2	4	0	6	284
d__Archaea	k__unclassified_d__Archaea	p__Euryarchaeota	c__Halobacteria	o__Haloferacales	f__Haloferacaceae	g__Halorubrum	s__Halorubrum_tropicale	0	0	0	4	0	0	0	0	0	0	0	0	0	2	0	0	0	0	0	2	0	0	2	0	6	0	0	0	2	6	4	4	4	8	8	6	58
d__Archaea	k__unclassified_d__Archaea	p__Euryarchaeota	c__Halobacteria	o__Haloferacales	f__Haloferacaceae	g__Halorubrum	s__Halorubrum_vacuolatum	12	10	18	2	6	12	10	2	10	20	20	14	14	6	2	4	10	8	4	0	4	2	6	8	16	14	16	20	6	26	0	0	4	2	4	6	318
d__Archaea	k__unclassified_d__Archaea	p__Euryarchaeota	c__Halobacteria	o__Haloferacales	f__Haloferacaceae	g__Halorubrum	s__Halorubrum_xinjiangense	0	0	0	16	0	10	10	8	18	14	26	16	8	0	4	2	0	2	0	0	0	0	0	2	0	0	0	2	2	2	0	0	0	0	0	0	142
d__Archaea	k__unclassified_d__Archaea	p__Euryarchaeota	c__Halobacteria	o__Haloferacales	f__Haloferacaceae	g__Halorubrum	s__Halorubrum_yunnanense	2	0	10	2	6	6	6	2	0	2	0	0	2	4	0	0	4	0	4	2	0	0	0	2	2	0	4	6	0	8	2	0	0	0	0	2	78
d__Archaea	k__unclassified_d__Archaea	p__Euryarchaeota	c__Halobacteria	o__Haloferacales	f__Haloferacaceae	g__Natronocalculus	s__Natronocalculus_amylovorans	4	4	0	4	6	8	4	10	2	0	2	2	16	18	8	8	4	10	0	4	10	60	6	40	0	2	4	4	2	2	32	16	16	14	22	26	370
d__Archaea	k__unclassified_d__Archaea	p__Euryarchaeota	c__Halobacteria	o__Haloferacales	f__Haloferacaceae	g__Salinigranum	s__Salinigranum_halophilum	38	20	14	108	138	100	128	140	100	134	98	144	164	148	98	76	56	92	76	60	90	108	36	38	138	124	120	72	98	130	106	98	94	84	82	88	3438
d__Archaea	k__unclassified_d__Archaea	p__Euryarchaeota	c__Halobacteria	o__Haloferacales	f__Haloferacaceae	g__Salinigranum	s__Salinigranum_rubrum	140	128	92	276	254	400	344	392	362	302	276	368	408	356	248	168	162	144	158	162	238	246	126	154	358	402	368	288	280	394	132	106	132	224	136	112	8836
d__Archaea	k__unclassified_d__Archaea	p__Euryarchaeota	c__Halobacteria	o__Haloferacales	f__Haloferacaceae	g__Salinigranum	s__Salinigranum_salinum	122	102	90	372	304	458	476	460	436	394	428	366	328	206	208	164	40	184	280	276	382	330	296	286	630	542	546	428	382	614	502	504	520	478	534	396	13064
d__Archaea	k__unclassified_d__Archaea	p__Euryarchaeota	c__Halobacteria	o__Haloferacales	f__Haloferacaceae	g__Salinigranum	s__Salinigranum_sp._XZGYJ-43	44	28	16	26	22	46	44	16	14	22	22	36	12	30	24	18	26	18	4	0	2	0	14	26	10	8	8	0	8	8	14	8	8	8	12	30	632
d__Archaea	k__unclassified_d__Archaea	p__Euryarchaeota	c__Halobacteria	o__Haloferacales	f__Haloferacaceae	g__Salinirubrum	s__Salinirubrum_litoreum	56	46	54	114	122	104	136	100	108	148	102	90	124	134	112	82	64	54	72	84	92	68	36	66	192	210	150	138	138	158	126	132	86	124	108	110	3840
d__Archaea	k__unclassified_d__Archaea	p__Euryarchaeota	c__Halobacteria	o__Haloferacales	f__Haloferacaceae	g__unclassified_f__Haloferacaceae	s__Halorubraceae_archaeon_YAN	2	14	2	2	2	8	0	0	6	6	0	2	10	0	4	4	0	6	2	2	4	0	0	2	4	12	0	2	0	0	0	0	0	0	0	0	96
d__Archaea	k__unclassified_d__Archaea	p__Euryarchaeota	c__Halobacteria	o__Haloferacales	f__unclassified_o__Haloferacales	g__unclassified_o__Haloferacales	s__halophilic_archaeon_DL31	18	24	8	6	8	12	16	16	6	4	10	2	4	20	16	18	24	8	4	16	10	8	4	14	8	0	14	2	2	6	8	10	6	10	8	4	354
d__Archaea	k__unclassified_d__Archaea	p__Euryarchaeota	c__Halobacteria	o__Halorutilales	f__Halorutilaceae	g__Halorutilus	s__Halorutilus_salinus	2	14	22	28	30	30	40	64	38	22	42	32	12	10	6	4	0	10	32	12	10	6	84	14	38	28	42	70	64	72	4	6	8	10	12	18	936
d__Archaea	k__unclassified_d__Archaea	p__Euryarchaeota	c__Halobacteria	o__Natrialbales	f__Natrialbaceae	g__Halobiforma	s__Halobiforma_haloterrestris	0	6	0	10	8	2	20	18	14	10	32	26	24	28	14	22	8	12	6	0	2	10	8	0	64	58	60	82	44	74	6	2	12	0	10	2	694
d__Archaea	k__unclassified_d__Archaea	p__Euryarchaeota	c__Halobacteria	o__Natrialbales	f__Natrialbaceae	g__Halobiforma	s__Halobiforma_lacisalsi	0	0	2	8	12	14	18	10	10	26	28	16	20	18	6	6	4	8	8	2	2	12	2	4	4	6	4	2	2	20	4	8	14	10	4	6	320
d__Archaea	k__unclassified_d__Archaea	p__Euryarchaeota	c__Halobacteria	o__Natrialbales	f__Natrialbaceae	g__Halobiforma	s__Halobiforma_nitratireducens	4	0	0	0	0	8	2	2	0	2	0	4	0	0	8	2	2	6	14	14	4	120	12	18	4	8	8	14	4	22	0	0	0	0	0	2	284
d__Archaea	k__unclassified_d__Archaea	p__Euryarchaeota	c__Halobacteria	o__Natrialbales	f__Natrialbaceae	g__Halopiger	s__Halopiger_aswanensis	6	4	8	38	10	24	18	24	18	20	38	6	20	6	14	18	30	20	2	4	6	18	36	16	64	42	38	78	58	74	18	4	18	18	4	16	836
d__Archaea	k__unclassified_d__Archaea	p__Euryarchaeota	c__Halobacteria	o__Natrialbales	f__Natrialbaceae	g__Halopiger	s__Halopiger_djelfimassiliensis	10	2	0	18	20	24	14	28	16	14	30	22	18	4	18	10	4	10	4	0	2	6	46	12	10	4	2	2	2	8	0	0	0	0	4	6	370
d__Archaea	k__unclassified_d__Archaea	p__Euryarchaeota	c__Halobacteria	o__Natrialbales	f__Natrialbaceae	g__Halopiger	s__Halopiger_goleimassiliensis	2	0	0	94	72	80	68	78	40	14	36	28	48	34	36	8	6	12	6	4	4	0	2	2	0	2	2	0	0	0	2	20	4	12	26	14	756
d__Archaea	k__unclassified_d__Archaea	p__Euryarchaeota	c__Halobacteria	o__Natrialbales	f__Natrialbaceae	g__Halopiger	s__Halopiger_xanaduensis	0	2	0	10	6	24	22	20	8	24	16	8	4	0	0	0	6	6	0	2	8	10	4	10	10	0	10	16	10	30	4	6	12	6	4	12	310
d__Archaea	k__unclassified_d__Archaea	p__Euryarchaeota	c__Halobacteria	o__Natrialbales	f__Natrialbaceae	g__Halosolutus	s__Halosolutus_amylolyticus	18	6	22	56	62	92	78	92	98	50	90	56	26	50	28	32	2	46	30	34	26	26	16	18	18	20	42	16	18	30	18	14	14	20	12	12	1288
d__Archaea	k__unclassified_d__Archaea	p__Euryarchaeota	c__Halobacteria	o__Natrialbales	f__Natrialbaceae	g__Halosolutus	s__Halosolutus_gelatinilyticus	18	16	30	24	24	50	40	38	42	42	50	46	40	32	26	14	8	8	32	18	14	18	30	16	12	4	12	22	34	48	10	2	10	14	14	26	884
d__Archaea	k__unclassified_d__Archaea	p__Euryarchaeota	c__Halobacteria	o__Natrialbales	f__Natrialbaceae	g__Halosolutus	s__Halosolutus_halophilus	12	16	18	76	62	84	54	58	58	70	82	62	30	38	10	10	16	38	40	32	50	12	22	44	44	64	52	28	18	104	18	18	14	36	28	20	1438
d__Archaea	k__unclassified_d__Archaea	p__Euryarchaeota	c__Halobacteria	o__Natrialbales	f__Natrialbaceae	g__Halostagnicola	s__Halostagnicola_kamekurae	0	8	0	8	2	4	2	6	16	12	2	4	2	4	0	2	6	4	24	6	8	20	10	4	0	4	2	4	0	12	4	10	4	0	4	6	204
d__Archaea	k__unclassified_d__Archaea	p__Euryarchaeota	c__Halobacteria	o__Natrialbales	f__Natrialbaceae	g__Halostagnicola	s__Halostagnicola_larsenii	10	14	6	48	14	32	20	6	38	46	34	44	16	6	0	4	6	2	0	4	0	2	10	2	32	16	18	28	10	38	4	8	2	8	8	2	538
d__Archaea	k__unclassified_d__Archaea	p__Euryarchaeota	c__Halobacteria	o__Natrialbales	f__Natrialbaceae	g__Halostagnicola	s__Halostagnicola_sp._A-GB9-2	222	150	228	408	360	466	538	516	540	340	528	434	422	328	184	204	68	276	182	192	276	238	80	88	440	486	396	338	288	394	258	218	262	294	236	278	11156
d__Archaea	k__unclassified_d__Archaea	p__Euryarchaeota	c__Halobacteria	o__Natrialbales	f__Natrialbaceae	g__Halostagnicola	s__Halostagnicola_sp._A56	0	2	0	10	18	6	18	18	16	2	6	8	8	8	2	2	0	8	0	0	0	0	0	0	0	0	0	0	0	0	4	2	8	8	0	8	162
d__Archaea	k__unclassified_d__Archaea	p__Euryarchaeota	c__Halobacteria	o__Natrialbales	f__Natrialbaceae	g__Haloterrigena	s__Haloterrigena_alkaliphila	10	4	8	24	20	12	10	8	20	6	12	14	48	26	38	10	10	12	14	10	6	6	2	2	6	0	0	12	2	22	46	14	30	22	32	26	544
d__Archaea	k__unclassified_d__Archaea	p__Euryarchaeota	c__Halobacteria	o__Natrialbales	f__Natrialbaceae	g__Haloterrigena	s__Haloterrigena_gelatinilytica	12	6	18	22	10	8	14	24	26	12	2	16	4	12	10	6	0	12	16	14	14	4	6	2	12	10	6	14	28	22	10	2	22	12	16	16	440
d__Archaea	k__unclassified_d__Archaea	p__Euryarchaeota	c__Halobacteria	o__Natrialbales	f__Natrialbaceae	g__Haloterrigena	s__Haloterrigena_salifodinae	42	16	50	78	80	90	110	130	78	74	84	102	42	26	8	16	10	34	58	22	24	24	12	12	6	10	6	6	6	16	10	14	4	6	16	10	1332
d__Archaea	k__unclassified_d__Archaea	p__Euryarchaeota	c__Halobacteria	o__Natrialbales	f__Natrialbaceae	g__Haloterrigena	s__Haloterrigena_salina	18	2	6	8	12	2	6	8	4	8	6	0	10	8	2	10	8	0	10	14	12	18	16	22	14	22	30	32	10	16	8	12	6	8	16	4	388
d__Archaea	k__unclassified_d__Archaea	p__Euryarchaeota	c__Halobacteria	o__Natrialbales	f__Natrialbaceae	g__Haloterrigena	s__Haloterrigena_sp.	0	0	0	0	0	0	0	0	0	0	0	0	0	0	0	0	0	0	0	0	0	0	0	4	0	0	0	0	0	0	0	0	0	0	0	0	4
d__Archaea	k__unclassified_d__Archaea	p__Euryarchaeota	c__Halobacteria	o__Natrialbales	f__Natrialbaceae	g__Haloterrigena	s__Haloterrigena_sp._H1	20	2	4	10	16	18	38	14	20	10	10	4	20	8	16	6	10	6	10	4	14	8	6	6	12	12	14	8	18	14	14	10	8	4	8	6	408
d__Archaea	k__unclassified_d__Archaea	p__Euryarchaeota	c__Halobacteria	o__Natrialbales	f__Natrialbaceae	g__Haloterrigena	s__Haloterrigena_turkmenica	24	16	10	98	96	138	136	120	140	164	110	90	82	126	64	40	24	52	110	102	96	168	82	88	142	124	138	112	122	150	22	32	32	40	72	36	3198
d__Archaea	k__unclassified_d__Archaea	p__Euryarchaeota	c__Halobacteria	o__Natrialbales	f__Natrialbaceae	g__Halovivax	s__Halovivax_asiaticus	0	0	0	16	4	20	16	10	6	24	6	4	8	8	4	0	0	2	4	2	2	20	0	18	2	0	2	0	0	0	0	2	2	0	0	0	182
d__Archaea	k__unclassified_d__Archaea	p__Euryarchaeota	c__Halobacteria	o__Natrialbales	f__Natrialbaceae	g__Halovivax	s__Halovivax_cerinus	204	68	172	12	2	8	14	12	6	8	14	8	8	12	16	10	0	0	8	6	2	18	14	16	12	4	16	8	8	16	8	6	4	14	16	4	754
d__Archaea	k__unclassified_d__Archaea	p__Euryarchaeota	c__Halobacteria	o__Natrialbales	f__Natrialbaceae	g__Halovivax	s__Halovivax_gelatinilyticus	12	14	8	14	20	20	22	36	14	8	18	32	16	14	20	6	24	6	4	6	10	10	4	8	118	84	134	80	80	132	4	8	12	20	4	10	1032
d__Archaea	k__unclassified_d__Archaea	p__Euryarchaeota	c__Halobacteria	o__Natrialbales	f__Natrialbaceae	g__Halovivax	s__Halovivax_limisalsi	26	18	24	44	48	32	60	70	36	36	40	60	26	40	24	6	0	20	10	8	10	24	0	8	18	18	14	34	10	62	10	22	18	4	8	18	906
d__Archaea	k__unclassified_d__Archaea	p__Euryarchaeota	c__Halobacteria	o__Natrialbales	f__Natrialbaceae	g__Halovivax	s__Halovivax_ruber	0	2	6	26	28	16	34	20	30	14	14	14	6	20	14	20	18	8	16	2	2	0	46	50	8	4	4	6	8	6	10	6	2	6	4	0	470
d__Archaea	k__unclassified_d__Archaea	p__Euryarchaeota	c__Halobacteria	o__Natrialbales	f__Natrialbaceae	g__Halovivax	s__Halovivax_sp.	30	26	30	82	52	76	80	74	80	70	80	90	66	50	32	18	14	10	30	34	34	46	16	18	184	130	130	94	94	154	50	64	38	52	56	76	2260
d__Archaea	k__unclassified_d__Archaea	p__Euryarchaeota	c__Halobacteria	o__Natrialbales	f__Natrialbaceae	g__Halovivax	s__Halovivax_sp._KZCA124	16	18	16	52	38	42	14	26	42	38	42	36	48	26	12	42	16	20	14	12	24	12	22	24	40	24	34	70	70	92	14	16	12	14	6	8	1052
d__Archaea	k__unclassified_d__Archaea	p__Euryarchaeota	c__Halobacteria	o__Natrialbales	f__Natrialbaceae	g__Halovivax	s__Halovivax_sp._TS33	10	12	10	52	36	66	44	32	40	36	8	18	100	58	50	50	62	20	82	66	50	156	58	34	76	48	50	78	64	86	132	134	128	86	106	104	2242
d__Archaea	k__unclassified_d__Archaea	p__Euryarchaeota	c__Halobacteria	o__Natrialbales	f__Natrialbaceae	g__Natrarchaeobaculum	s__Natrarchaeobaculum_aegyptiacum	6	0	0	2	8	14	10	12	6	26	8	16	12	10	26	6	0	6	6	12	14	24	8	6	10	10	10	16	18	32	4	4	4	4	6	4	360
d__Archaea	k__unclassified_d__Archaea	p__Euryarchaeota	c__Halobacteria	o__Natrialbales	f__Natrialbaceae	g__Natrarchaeobaculum	s__Natrarchaeobaculum_sulfurireducens	0	0	2	2	0	24	12	10	2	12	24	4	4	14	14	16	20	6	4	0	6	22	8	2	4	2	2	24	12	22	10	18	6	2	8	4	322
d__Archaea	k__unclassified_d__Archaea	p__Euryarchaeota	c__Halobacteria	o__Natrialbales	f__Natrialbaceae	g__Natrarchaeobaculum	s__Natrialbaceae_archaeon_AArc-T1-2	0	0	0	4	4	4	6	6	4	8	10	18	0	2	0	0	0	2	10	2	12	0	2	8	0	0	0	10	2	8	0	0	12	4	6	0	144
d__Archaea	k__unclassified_d__Archaea	p__Euryarchaeota	c__Halobacteria	o__Natrialbales	f__Natrialbaceae	g__Natrarchaeobius	s__Natrarchaeobius_chitinivorans	38	30	30	104	78	86	62	78	70	60	40	58	38	60	30	16	4	14	24	34	42	90	22	60	140	176	116	86	70	152	22	22	30	26	26	16	2050
d__Archaea	k__unclassified_d__Archaea	p__Euryarchaeota	c__Halobacteria	o__Natrialbales	f__Natrialbaceae	g__Natrarchaeobius	s__Natrarchaeobius_halalkaliphilus	0	20	16	18	6	16	12	16	14	16	38	12	10	10	8	4	0	4	0	2	4	2	2	0	8	8	6	4	2	6	6	16	10	8	14	4	322
d__Archaea	k__unclassified_d__Archaea	p__Euryarchaeota	c__Halobacteria	o__Natrialbales	f__Natrialbaceae	g__Natrialba	s__Natrialba_aegyptia	32	34	22	62	40	66	50	68	78	76	94	52	56	60	26	14	18	42	24	24	36	12	8	18	6	6	2	4	14	12	56	84	50	108	92	80	1526
d__Archaea	k__unclassified_d__Archaea	p__Euryarchaeota	c__Halobacteria	o__Natrialbales	f__Natrialbaceae	g__Natrialba	s__Natrialba_asiatica	6	20	12	20	10	22	14	26	20	26	34	38	28	24	10	2	2	14	2	0	0	0	2	2	14	16	20	18	6	16	0	10	6	6	6	2	454
d__Archaea	k__unclassified_d__Archaea	p__Euryarchaeota	c__Halobacteria	o__Natrialbales	f__Natrialbaceae	g__Natrialba	s__Natrialba_chahannaoensis	0	2	0	24	4	4	18	10	8	10	8	0	4	6	2	8	32	6	20	10	28	38	10	16	34	22	12	20	24	34	2	2	4	6	0	6	434
d__Archaea	k__unclassified_d__Archaea	p__Euryarchaeota	c__Halobacteria	o__Natrialbales	f__Natrialbaceae	g__Natrialba	s__Natrialba_hulunbeirensis	32	14	24	0	4	0	2	6	8	2	2	4	14	14	12	6	2	2	0	0	2	6	6	4	2	0	0	20	14	10	0	0	0	0	0	0	212
d__Archaea	k__unclassified_d__Archaea	p__Euryarchaeota	c__Halobacteria	o__Natrialbales	f__Natrialbaceae	g__Natrialba	s__Natrialba_magadii	0	0	4	8	18	20	10	6	24	16	6	8	16	6	14	10	16	28	8	6	6	0	8	2	4	0	0	6	6	8	6	10	6	2	4	2	294
d__Archaea	k__unclassified_d__Archaea	p__Euryarchaeota	c__Halobacteria	o__Natrialbales	f__Natrialbaceae	g__Natrialba	s__Natrialba_sp.	0	0	0	0	0	0	0	0	0	0	0	0	0	0	0	0	0	0	2	8	10	6	4	0	10	6	16	16	8	8	0	4	2	2	0	2	104
d__Archaea	k__unclassified_d__Archaea	p__Euryarchaeota	c__Halobacteria	o__Natrialbales	f__Natrialbaceae	g__Natrialba	s__Natrialba_sp._INN-245	10	4	8	0	0	4	8	4	2	4	2	0	24	22	18	12	24	36	6	2	8	64	4	2	6	0	10	32	0	10	2	2	0	8	0	2	340
d__Archaea	k__unclassified_d__Archaea	p__Euryarchaeota	c__Halobacteria	o__Natrialbales	f__Natrialbaceae	g__Natrialba	s__Natrialba_sp._SSL1	14	16	24	12	0	2	22	8	14	16	14	18	8	2	0	0	2	30	2	0	14	8	0	2	8	0	2	2	12	2	2	6	2	8	10	6	288
d__Archaea	k__unclassified_d__Archaea	p__Euryarchaeota	c__Halobacteria	o__Natrialbales	f__Natrialbaceae	g__Natrialba	s__Natrialba_swarupiae	0	6	0	24	6	8	12	14	22	22	26	18	18	8	48	6	12	10	18	8	2	22	8	2	6	20	6	10	6	14	16	22	30	30	18	26	524
d__Archaea	k__unclassified_d__Archaea	p__Euryarchaeota	c__Halobacteria	o__Natrialbales	f__Natrialbaceae	g__Natrialba	s__Natrialba_taiwanensis	0	0	0	2	0	4	2	2	2	0	2	0	4	6	0	0	2	0	10	16	12	14	6	0	30	10	20	20	6	20	22	20	14	14	14	16	290
d__Archaea	k__unclassified_d__Archaea	p__Euryarchaeota	c__Halobacteria	o__Natrialbales	f__Natrialbaceae	g__Natribaculum	s__Natribaculum_luteum	72	54	58	42	52	84	68	70	72	66	60	60	120	84	44	34	8	42	42	46	54	30	32	26	26	28	46	66	24	54	60	60	42	60	44	34	1864
d__Archaea	k__unclassified_d__Archaea	p__Euryarchaeota	c__Halobacteria	o__Natrialbales	f__Natrialbaceae	g__Natrinema	s__Natrinema_altunense	0	0	2	4	8	0	6	8	6	8	14	6	0	4	2	8	0	0	6	2	14	4	0	0	44	6	14	34	18	72	2	0	4	4	0	0	300
d__Archaea	k__unclassified_d__Archaea	p__Euryarchaeota	c__Halobacteria	o__Natrialbales	f__Natrialbaceae	g__Natrinema	s__Natrinema_amylolyticum	0	2	4	16	32	36	18	34	14	18	18	14	6	8	0	2	2	12	24	6	16	34	18	4	12	22	16	30	20	26	8	18	10	6	12	12	530
d__Archaea	k__unclassified_d__Archaea	p__Euryarchaeota	c__Halobacteria	o__Natrialbales	f__Natrialbaceae	g__Natrinema	s__Natrinema_caseinilyticum	24	28	16	140	116	126	164	146	146	156	132	128	60	64	46	24	16	24	100	86	128	170	120	86	122	140	138	102	172	166	70	108	90	76	94	114	3638
d__Archaea	k__unclassified_d__Archaea	p__Euryarchaeota	c__Halobacteria	o__Natrialbales	f__Natrialbaceae	g__Natrinema	s__Natrinema_ejinorense	6	4	2	16	16	20	8	4	26	28	10	34	4	4	6	4	4	10	6	4	12	4	6	2	24	34	22	14	8	6	0	2	8	2	14	6	380
d__Archaea	k__unclassified_d__Archaea	p__Euryarchaeota	c__Halobacteria	o__Natrialbales	f__Natrialbaceae	g__Natrinema	s__Natrinema_gari	4	2	0	2	2	0	0	14	0	0	0	0	2	2	0	0	0	0	0	0	0	0	0	0	0	0	0	0	0	0	0	0	0	0	0	0	28
d__Archaea	k__unclassified_d__Archaea	p__Euryarchaeota	c__Halobacteria	o__Natrialbales	f__Natrialbaceae	g__Natrinema	s__Natrinema_gelatinilyticum	24	20	16	42	20	60	48	38	60	48	66	46	98	68	80	40	26	24	42	36	42	58	36	6	40	28	50	22	52	70	66	38	32	18	26	46	1532
d__Archaea	k__unclassified_d__Archaea	p__Euryarchaeota	c__Halobacteria	o__Natrialbales	f__Natrialbaceae	g__Natrinema	s__Natrinema_halophilum	0	2	2	6	14	30	20	24	42	4	36	30	6	6	8	6	2	4	6	4	28	0	12	2	8	4	10	36	26	8	4	10	6	14	6	8	434
d__Archaea	k__unclassified_d__Archaea	p__Euryarchaeota	c__Halobacteria	o__Natrialbales	f__Natrialbaceae	g__Natrinema	s__Natrinema_hispanicum	4	4	8	30	34	54	48	46	72	70	64	36	18	18	12	22	6	12	16	12	10	14	28	4	32	38	28	34	56	42	8	4	0	0	10	0	894
d__Archaea	k__unclassified_d__Archaea	p__Euryarchaeota	c__Halobacteria	o__Natrialbales	f__Natrialbaceae	g__Natrinema	s__Natrinema_limicola	0	0	0	8	2	2	2	0	2	0	2	6	6	2	0	0	0	8	26	24	36	2	38	34	10	24	12	6	24	22	4	0	0	6	4	6	318
d__Archaea	k__unclassified_d__Archaea	p__Euryarchaeota	c__Halobacteria	o__Natrialbales	f__Natrialbaceae	g__Natrinema	s__Natrinema_longum	0	0	0	2	4	4	10	4	10	6	8	20	0	0	0	0	0	0	0	0	0	8	32	32	10	6	6	44	4	20	2	0	6	2	2	0	242
d__Archaea	k__unclassified_d__Archaea	p__Euryarchaeota	c__Halobacteria	o__Natrialbales	f__Natrialbaceae	g__Natrinema	s__Natrinema_mahii	0	0	2	6	4	8	2	0	12	2	2	6	2	4	2	4	8	14	0	0	0	2	0	0	2	0	2	4	0	12	0	0	0	0	2	0	102
d__Archaea	k__unclassified_d__Archaea	p__Euryarchaeota	c__Halobacteria	o__Natrialbales	f__Natrialbaceae	g__Natrinema	s__Natrinema_marinum	8	32	12	64	38	34	78	108	44	92	66	116	18	16	14	26	4	24	30	18	32	4	32	8	10	14	12	22	10	16	2	6	0	2	6	16	1034
d__Archaea	k__unclassified_d__Archaea	p__Euryarchaeota	c__Halobacteria	o__Natrialbales	f__Natrialbaceae	g__Natrinema	s__Natrinema_pallidum	4	6	0	4	12	4	14	8	10	2	0	2	12	26	6	10	0	12	0	0	4	0	0	0	12	0	2	2	4	16	0	6	0	0	2	2	182
d__Archaea	k__unclassified_d__Archaea	p__Euryarchaeota	c__Halobacteria	o__Natrialbales	f__Natrialbaceae	g__Natrinema	s__Natrinema_pellirubrum	4	0	2	14	18	36	16	30	32	60	48	56	4	4	8	0	0	14	0	0	0	0	0	2	0	8	0	0	0	0	2	12	4	6	2	6	388
d__Archaea	k__unclassified_d__Archaea	p__Euryarchaeota	c__Halobacteria	o__Natrialbales	f__Natrialbaceae	g__Natrinema	s__Natrinema_saccharevitans	16	8	2	18	24	36	26	34	40	30	30	14	12	8	14	14	6	12	8	0	2	0	0	0	4	4	10	6	0	2	2	2	2	2	2	0	390
d__Archaea	k__unclassified_d__Archaea	p__Euryarchaeota	c__Halobacteria	o__Natrialbales	f__Natrialbaceae	g__Natrinema	s__Natrinema_salaciae	10	16	2	70	68	76	44	56	16	58	76	46	54	58	26	20	24	28	30	22	26	42	36	8	14	8	20	34	30	26	34	10	22	42	40	28	1220
d__Archaea	k__unclassified_d__Archaea	p__Euryarchaeota	c__Halobacteria	o__Natrialbales	f__Natrialbaceae	g__Natrinema	s__Natrinema_salifodinae	4	12	10	10	2	8	14	18	14	20	14	12	22	28	16	4	8	18	26	10	32	24	4	2	18	20	24	14	22	30	18	26	14	22	4	16	560
d__Archaea	k__unclassified_d__Archaea	p__Euryarchaeota	c__Halobacteria	o__Natrialbales	f__Natrialbaceae	g__Natrinema	s__Natrinema_salinisoli	0	0	0	4	8	16	18	10	0	10	4	6	14	2	20	2	12	2	0	2	2	0	2	0	32	8	24	32	22	48	2	2	0	2	6	2	314
d__Archaea	k__unclassified_d__Archaea	p__Euryarchaeota	c__Halobacteria	o__Natrialbales	f__Natrialbaceae	g__Natrinema	s__Natrinema_salsiterrestre	12	4	12	22	18	28	4	22	24	42	30	44	10	2	10	14	10	4	0	24	4	14	4	8	10	12	6	10	8	12	16	18	12	4	8	10	492
d__Archaea	k__unclassified_d__Archaea	p__Euryarchaeota	c__Halobacteria	o__Natrialbales	f__Natrialbaceae	g__Natrinema	s__Natrinema_soli	34	32	32	126	90	62	110	82	112	100	84	58	72	82	36	22	18	18	30	34	30	8	20	22	76	78	82	24	32	46	28	12	34	28	24	16	1794
d__Archaea	k__unclassified_d__Archaea	p__Euryarchaeota	c__Halobacteria	o__Natrialbales	f__Natrialbaceae	g__Natrinema	s__Natrinema_sp.	0	0	0	0	2	4	10	6	0	0	12	2	0	0	0	0	0	6	0	0	0	0	4	0	6	2	4	8	4	6	2	0	0	2	0	6	86
d__Archaea	k__unclassified_d__Archaea	p__Euryarchaeota	c__Halobacteria	o__Natrialbales	f__Natrialbaceae	g__Natrinema	s__Natrinema_sp._CBA1119	42	20	18	4	4	0	6	10	4	0	8	0	26	38	10	24	32	38	2	2	4	0	0	0	24	18	30	10	14	14	0	2	2	2	2	4	414
d__Archaea	k__unclassified_d__Archaea	p__Euryarchaeota	c__Halobacteria	o__Natrialbales	f__Natrialbaceae	g__Natrinema	s__Natrinema_sp._DC36	16	10	6	26	24	8	22	32	18	18	16	14	48	46	36	30	2	10	8	14	0	2	10	6	40	44	44	38	66	48	10	4	2	6	6	12	742
d__Archaea	k__unclassified_d__Archaea	p__Euryarchaeota	c__Halobacteria	o__Natrialbales	f__Natrialbaceae	g__Natrinema	s__Natrinema_sp._J7-2	0	2	0	0	0	0	2	0	0	4	2	0	4	2	0	0	8	0	6	0	12	2	0	0	0	0	0	0	0	0	2	6	4	14	2	2	74
d__Archaea	k__unclassified_d__Archaea	p__Euryarchaeota	c__Halobacteria	o__Natrialbales	f__Natrialbaceae	g__Natrinema	s__Natrinema_sp._SYSU_A_869	12	16	10	18	16	10	20	24	6	12	20	32	22	4	6	24	14	12	0	8	2	12	2	4	24	26	28	30	42	56	6	6	8	4	8	6	550
d__Archaea	k__unclassified_d__Archaea	p__Euryarchaeota	c__Halobacteria	o__Natrialbales	f__Natrialbaceae	g__Natrinema	s__Natrinema_thermotolerans	0	0	0	10	8	14	4	22	4	8	10	12	14	6	0	2	6	16	0	8	4	6	12	14	6	10	14	6	10	16	2	2	4	4	2	2	258
d__Archaea	k__unclassified_d__Archaea	p__Euryarchaeota	c__Halobacteria	o__Natrialbales	f__Natrialbaceae	g__Natrinema	s__Natrinema_versiforme	44	24	46	80	62	42	86	82	64	86	114	76	28	46	14	10	16	16	18	10	2	8	24	6	22	16	8	12	18	12	28	20	18	28	30	14	1230
d__Archaea	k__unclassified_d__Archaea	p__Euryarchaeota	c__Halobacteria	o__Natrialbales	f__Natrialbaceae	g__Natrinema	s__Natrinema_zhouii	10	8	12	4	6	8	16	8	8	4	2	0	0	0	4	2	0	2	10	4	2	0	0	8	18	20	30	20	36	44	2	0	4	4	4	12	312
d__Archaea	k__unclassified_d__Archaea	p__Euryarchaeota	c__Halobacteria	o__Natrialbales	f__Natrialbaceae	g__Natronobacterium	s__Natronobacterium_gregoryi	6	2	4	12	24	14	14	20	16	18	6	24	2	4	4	4	2	14	16	12	6	24	4	4	4	2	0	2	6	4	0	0	8	0	2	2	286
d__Archaea	k__unclassified_d__Archaea	p__Euryarchaeota	c__Halobacteria	o__Natrialbales	f__Natrialbaceae	g__Natronobacterium	s__Natronobacterium_texcoconense	16	2	14	28	38	30	30	28	40	66	52	66	28	12	24	34	4	16	0	2	2	0	0	4	4	4	2	14	14	12	6	6	4	16	20	8	646
d__Archaea	k__unclassified_d__Archaea	p__Euryarchaeota	c__Halobacteria	o__Natrialbales	f__Natrialbaceae	g__Natronobeatus	s__Natronobeatus_ordinarius	10	6	6	38	60	62	74	64	82	56	66	44	52	38	30	6	18	28	4	26	34	48	42	46	142	168	166	126	98	146	12	18	0	8	16	10	1850
d__Archaea	k__unclassified_d__Archaea	p__Euryarchaeota	c__Halobacteria	o__Natrialbales	f__Natrialbaceae	g__Natronobiforma	s__Natronobiforma_cellulositropha	6	0	4	24	20	26	28	32	12	14	20	28	26	12	22	14	16	14	16	4	6	50	28	16	14	20	6	4	8	10	6	8	6	10	2	6	538
d__Archaea	k__unclassified_d__Archaea	p__Euryarchaeota	c__Halobacteria	o__Natrialbales	f__Natrialbaceae	g__Natronococcus	s__Natronococcus_amylolyticus	42	22	18	34	16	54	40	26	22	10	8	8	78	100	62	46	62	24	26	16	6	10	22	4	22	4	8	20	14	18	96	46	90	64	36	70	1244
d__Archaea	k__unclassified_d__Archaea	p__Euryarchaeota	c__Halobacteria	o__Natrialbales	f__Natrialbaceae	g__Natronococcus	s__Natronococcus_jeotgali	20	8	14	22	30	22	16	40	20	34	16	10	14	8	0	10	2	2	8	8	8	10	24	12	32	38	38	68	42	52	10	4	2	2	18	6	670
d__Archaea	k__unclassified_d__Archaea	p__Euryarchaeota	c__Halobacteria	o__Natrialbales	f__Natrialbaceae	g__Natronococcus	s__Natronococcus_occultus	0	2	2	78	32	32	40	32	36	34	42	32	16	10	10	8	4	16	4	12	0	2	12	12	2	6	14	10	14	10	18	8	16	20	14	8	608
d__Archaea	k__unclassified_d__Archaea	p__Euryarchaeota	c__Halobacteria	o__Natrialbales	f__Natrialbaceae	g__Natronococcus	s__Natronococcus_pandeyae	24	14	16	76	76	68	78	90	60	110	136	104	90	64	50	24	34	26	20	18	26	22	24	28	98	72	84	72	76	90	22	32	34	16	28	22	1924
d__Archaea	k__unclassified_d__Archaea	p__Euryarchaeota	c__Halobacteria	o__Natrialbales	f__Natrialbaceae	g__Natronococcus	s__Natronococcus_sp.	128	68	96	8	22	10	14	16	28	28	28	28	10	18	18	10	12	10	14	8	12	8	10	4	8	12	20	0	0	6	38	40	24	30	22	20	828
d__Archaea	k__unclassified_d__Archaea	p__Euryarchaeota	c__Halobacteria	o__Natrialbales	f__Natrialbaceae	g__Natronococcus	s__Natronococcus_sp._A-GB1	2	0	0	8	22	10	14	22	14	12	14	16	18	22	0	22	24	10	14	8	10	6	14	16	2	0	2	2	2	2	6	10	12	12	4	18	370
d__Archaea	k__unclassified_d__Archaea	p__Euryarchaeota	c__Halobacteria	o__Natrialbales	f__Natrialbaceae	g__Natronococcus	s__Natronococcus_sp._A-GB7	0	4	0	34	38	32	40	54	26	40	54	22	20	12	10	16	2	24	36	42	60	104	66	46	110	74	110	110	164	132	32	36	30	40	18	36	1674
d__Archaea	k__unclassified_d__Archaea	p__Euryarchaeota	c__Halobacteria	o__Natrialbales	f__Natrialbaceae	g__Natronococcus	s__Natronococcus_sp._CG52	24	20	14	40	54	60	46	84	50	58	62	22	10	20	12	10	16	26	8	6	2	4	8	6	12	20	12	8	8	4	0	6	4	4	8	10	758
d__Archaea	k__unclassified_d__Archaea	p__Euryarchaeota	c__Halobacteria	o__Natrialbales	f__Natrialbaceae	g__Natronococcus	s__Natronococcus_sp._JC468	52	8	12	70	46	84	64	40	70	54	72	38	28	34	12	20	2	40	30	30	48	10	10	42	16	24	32	20	14	48	28	36	18	12	18	38	1220
d__Archaea	k__unclassified_d__Archaea	p__Euryarchaeota	c__Halobacteria	o__Natrialbales	f__Natrialbaceae	g__Natronolimnobius	s__Natronolimnobius_baerhuensis	36	6	20	14	2	18	28	32	18	14	12	12	2	6	10	14	10	12	0	0	2	0	0	0	0	10	6	2	2	0	6	8	14	0	4	10	330
d__Archaea	k__unclassified_d__Archaea	p__Euryarchaeota	c__Halobacteria	o__Natrialbales	f__Natrialbaceae	g__Natronolimnobius	s__Natronolimnobius_sp._AArcel1	0	0	0	16	12	36	6	20	12	6	24	2	42	28	18	22	26	12	0	0	10	2	10	4	6	2	2	0	2	2	6	8	4	0	8	4	352
d__Archaea	k__unclassified_d__Archaea	p__Euryarchaeota	c__Halobacteria	o__Natrialbales	f__Natrialbaceae	g__Natronolimnohabitans	s__Natronolimnohabitans_innermongolicus	24	4	16	12	4	22	10	10	14	24	22	2	34	44	20	22	8	4	14	20	40	16	20	28	30	36	32	20	14	46	42	10	16	30	24	26	760
d__Archaea	k__unclassified_d__Archaea	p__Euryarchaeota	c__Halobacteria	o__Natrialbales	f__Natrialbaceae	g__Natrononativus	s__Natrononativus_amylolyticus	12	12	22	36	20	26	28	16	20	28	28	24	16	18	14	38	42	30	14	24	26	16	14	26	84	82	70	30	34	42	28	28	32	18	30	24	1052
d__Archaea	k__unclassified_d__Archaea	p__Euryarchaeota	c__Halobacteria	o__Natrialbales	f__Natrialbaceae	g__Natronorubrum	s__Natronorubrum_aibiense	0	2	0	6	12	12	14	22	14	2	4	18	36	36	8	46	10	32	22	16	36	42	12	8	54	34	16	32	26	26	16	28	20	34	36	40	772
d__Archaea	k__unclassified_d__Archaea	p__Euryarchaeota	c__Halobacteria	o__Natrialbales	f__Natrialbaceae	g__Natronorubrum	s__Natronorubrum_bangense	2	8	2	8	4	8	10	2	6	0	14	6	20	4	0	6	6	10	2	0	0	8	4	0	12	4	14	10	16	0	26	26	14	24	38	30	344
d__Archaea	k__unclassified_d__Archaea	p__Euryarchaeota	c__Halobacteria	o__Natrialbales	f__Natrialbaceae	g__Natronorubrum	s__Natronorubrum_daqingense	0	4	0	10	6	14	10	8	8	6	2	6	0	4	0	0	0	2	0	8	0	10	0	2	0	0	0	20	20	4	2	2	4	2	0	0	154
d__Archaea	k__unclassified_d__Archaea	p__Euryarchaeota	c__Halobacteria	o__Natrialbales	f__Natrialbaceae	g__Natronorubrum	s__Natronorubrum_halalkaliphilum	2	6	14	26	22	12	26	12	22	10	4	16	12	6	66	8	0	6	26	20	28	4	20	8	12	16	22	2	2	10	0	4	0	0	2	0	446
d__Archaea	k__unclassified_d__Archaea	p__Euryarchaeota	c__Halobacteria	o__Natrialbales	f__Natrialbaceae	g__Natronorubrum	s__Natronorubrum_halophilum	20	18	30	42	38	46	32	48	50	56	36	58	10	32	18	12	20	10	2	8	16	4	10	0	32	14	20	58	12	38	6	0	0	2	8	2	808
d__Archaea	k__unclassified_d__Archaea	p__Euryarchaeota	c__Halobacteria	o__Natrialbales	f__Natrialbaceae	g__Natronorubrum	s__Natronorubrum_sediminis	12	16	8	0	0	4	0	2	2	6	6	0	2	10	2	0	0	0	10	4	12	20	6	30	24	36	34	4	16	28	0	6	4	14	8	10	336
d__Archaea	k__unclassified_d__Archaea	p__Euryarchaeota	c__Halobacteria	o__Natrialbales	f__Natrialbaceae	g__Natronorubrum	s__Natronorubrum_sulfidifaciens	68	20	12	30	36	26	20	52	20	24	16	22	18	22	26	10	0	30	8	6	0	2	0	2	20	10	30	20	18	14	8	2	2	0	2	0	596
d__Archaea	k__unclassified_d__Archaea	p__Euryarchaeota	c__Halobacteria	o__Natrialbales	f__Natrialbaceae	g__Natronorubrum	s__Natronorubrum_texcoconense	14	12	4	72	18	28	50	26	38	42	34	26	26	28	12	10	2	20	40	38	28	104	38	20	6	6	16	30	14	40	34	56	50	46	42	28	1098
d__Archaea	k__unclassified_d__Archaea	p__Euryarchaeota	c__Halobacteria	o__Natrialbales	f__Natrialbaceae	g__Natronorubrum	s__Natronorubrum_thiooxidans	6	20	4	24	24	20	34	24	8	16	18	20	18	22	20	4	2	6	116	112	144	174	76	38	144	176	184	104	154	200	16	22	30	22	26	36	2064
d__Archaea	k__unclassified_d__Archaea	p__Euryarchaeota	c__Halobacteria	o__Natrialbales	f__Natrialbaceae	g__Natronorubrum	s__Natronorubrum_tibetense	10	12	4	8	0	24	18	8	22	22	30	16	14	12	10	12	2	16	48	36	40	40	40	36	48	30	40	30	40	52	22	18	30	20	18	36	864
d__Archaea	k__unclassified_d__Archaea	p__Euryarchaeota	c__Halobacteria	o__Natrialbales	f__Natrialbaceae	g__Natronosalvus	s__Natronosalvus_amylolyticus	22	12	18	10	6	8	16	32	12	8	16	20	8	30	6	8	20	6	10	4	12	2	8	4	10	44	28	4	4	4	4	0	4	6	2	4	412
d__Archaea	k__unclassified_d__Archaea	p__Euryarchaeota	c__Halobacteria	o__Natrialbales	f__Natrialbaceae	g__Natronosalvus	s__Natronosalvus_halobius	50	60	74	20	12	28	14	18	26	24	28	28	24	38	30	20	28	30	24	10	26	10	2	24	26	24	36	46	8	50	28	24	36	32	24	28	1010
d__Archaea	k__unclassified_d__Archaea	p__Euryarchaeota	c__Halobacteria	o__Natrialbales	f__Natrialbaceae	g__Natronosalvus	s__Natronosalvus_rutilus	24	34	32	78	80	86	126	124	124	100	132	102	78	40	22	36	18	36	48	18	24	110	106	70	86	60	90	90	86	138	14	30	18	38	26	32	2356
d__Archaea	k__unclassified_d__Archaea	p__Euryarchaeota	c__Halobacteria	o__Natrialbales	f__Natrialbaceae	g__Natronosalvus	s__Natronosalvus_vescus	4	10	2	14	8	20	10	20	8	24	20	8	22	12	6	6	12	8	8	18	26	12	4	4	10	4	12	8	10	8	40	22	26	22	16	24	488
d__Archaea	k__unclassified_d__Archaea	p__Euryarchaeota	c__Halobacteria	o__Natrialbales	f__Natrialbaceae	g__Salinadaptatus	s__Salinadaptatus_halalkaliphilus	0	2	2	18	22	30	30	22	26	48	26	30	20	16	16	24	14	18	2	0	8	0	0	6	8	6	10	6	4	4	20	14	10	20	14	4	500
d__Archaea	k__unclassified_d__Archaea	p__Euryarchaeota	c__Halobacteria	o__Natrialbales	f__Natrialbaceae	g__Salinilacihabitans	s__Salinilacihabitans_rarus	36	64	24	80	68	74	66	64	80	76	66	80	142	110	56	150	76	166	48	86	50	68	48	42	44	24	38	42	30	52	46	46	52	48	50	22	2314
d__Archaea	k__unclassified_d__Archaea	p__Euryarchaeota	c__Halobacteria	o__Natrialbales	f__Natrialbaceae	g__Saliphagus	s__Saliphagus_infecundisoli	40	12	8	82	42	72	78	64	52	72	82	72	76	78	52	26	2	34	8	28	56	22	64	48	30	38	42	46	40	54	78	54	70	66	60	56	1804
d__Archaea	k__unclassified_d__Archaea	p__Euryarchaeota	c__Halobacteria	o__Natrialbales	f__Natrialbaceae	g__Saliphagus	s__Saliphagus_sp.	0	0	0	4	0	8	0	2	8	10	10	8	10	8	8	10	18	0	8	4	2	8	12	2	14	16	18	4	8	30	20	6	18	10	20	14	318
d__Archaea	k__unclassified_d__Archaea	p__Euryarchaeota	c__Halobacteria	o__Natrialbales	f__Natrialbaceae	g__Saliphagus	s__Saliphagus_sp._LR7	12	24	18	50	22	34	50	28	44	42	56	52	28	30	36	6	26	20	26	18	48	40	18	24	38	32	44	56	40	68	32	26	20	38	38	24	1208
d__Archaea	k__unclassified_d__Archaea	p__Euryarchaeota	c__Halobacteria	o__unclassified_c__Halobacteria	f__unclassified_c__Halobacteria	g__unclassified_c__Halobacteria	s__Halobacteria_archaeon	143846	101832	126896	87464	71902	96396	105968	104208	134020	126634	142550	141296	54702	51418	42724	19342	18684	34328	88734	75810	79322	54690	61262	41092	196246	202428	212840	82602	98788	114810	117064	127756	117054	82638	57042	116434	3530822
d__Archaea	k__unclassified_d__Archaea	p__Euryarchaeota	c__Halobacteria	o__unclassified_c__Halobacteria	f__unclassified_c__Halobacteria	g__unclassified_c__Halobacteria	s__Halobacteria_archaeon_AArc-curdl1	10	6	0	42	28	16	42	12	24	22	44	16	36	16	10	8	2	2	18	12	18	2	22	38	6	0	4	0	4	4	6	2	2	4	6	8	492
d__Archaea	k__unclassified_d__Archaea	p__Euryarchaeota	c__Halobacteria	o__unclassified_c__Halobacteria	f__unclassified_c__Halobacteria	g__unclassified_c__Halobacteria	s__Halobacteria_archaeon_AArc-dxtr1	46	24	42	104	78	124	134	150	120	154	168	150	48	60	16	8	8	16	50	48	88	20	24	22	188	132	166	116	78	154	58	54	32	32	60	48	2820
d__Archaea	k__unclassified_d__Archaea	p__Euryarchaeota	c__Halobacteria	o__unclassified_c__Halobacteria	f__unclassified_c__Halobacteria	g__unclassified_c__Halobacteria	s__Halobacteria_archaeon_AArc-m2/3/4	24	6	8	20	22	18	22	28	26	28	18	16	50	40	14	14	14	44	34	20	40	36	24	26	34	38	38	16	18	24	8	2	12	8	8	4	802
d__Archaea	k__unclassified_d__Archaea	p__Euryarchaeota	c__Halobacteria	o__unclassified_c__Halobacteria	f__unclassified_c__Halobacteria	g__unclassified_c__Halobacteria	s__Halobacteria_archaeon_AArc-xg1-1	82	38	72	30	34	16	26	36	38	26	40	6	46	44	28	34	18	18	14	6	26	0	12	18	36	8	32	24	34	48	14	8	22	2	26	14	976
d__Archaea	k__unclassified_d__Archaea	p__Euryarchaeota	c__Halobacteria	o__unclassified_c__Halobacteria	f__unclassified_c__Halobacteria	g__unclassified_c__Halobacteria	s__Halobacteria_archaeon_HArc-gm2	16	10	4	34	16	12	10	24	22	26	52	16	14	6	8	14	8	2	16	2	14	8	22	6	16	12	4	16	22	18	14	12	32	20	18	26	572
d__Archaea	k__unclassified_d__Archaea	p__Euryarchaeota	c__Methanobacteria	o__Methanobacteriales	f__Methanobacteriaceae	g__Methanobacterium	s__Methanobacterium_aggregans	34	40	28	20	20	38	34	68	34	46	54	56	94	108	72	76	52	56	48	40	50	60	36	18	242	176	222	198	164	248	124	118	78	120	126	118	3116
d__Archaea	k__unclassified_d__Archaea	p__Euryarchaeota	c__Methanobacteria	o__Methanobacteriales	f__Methanobacteriaceae	g__Methanobacterium	s__Methanobacterium_alcaliphilum	10	18	10	34	18	44	28	28	36	16	14	22	110	22	34	66	112	36	8	10	6	22	10	4	2	0	0	54	18	24	32	22	14	34	54	42	1014
d__Archaea	k__unclassified_d__Archaea	p__Euryarchaeota	c__Methanobacteria	o__Methanobacteriales	f__Methanobacteriaceae	g__Methanobacterium	s__Methanobacterium_alkalithermotolerans	28	8	38	54	24	60	54	58	26	34	38	60	68	44	46	26	30	28	110	108	158	108	80	66	156	150	174	158	134	202	84	70	74	52	114	72	2794
d__Archaea	k__unclassified_d__Archaea	p__Euryarchaeota	c__Methanobacteria	o__Methanobacteriales	f__Methanobacteriaceae	g__Methanobacterium	s__Methanobacterium_beijingense	2	0	0	0	0	0	0	0	0	0	0	0	0	0	0	0	0	0	0	0	0	0	0	0	0	0	0	0	0	0	10	6	6	4	0	2	30
d__Archaea	k__unclassified_d__Archaea	p__Euryarchaeota	c__Methanobacteria	o__Methanobacteriales	f__Methanobacteriaceae	g__Methanobacterium	s__Methanobacterium_bryantii	0	0	0	0	2	6	2	0	4	0	0	0	0	2	0	6	2	6	8	0	2	2	0	0	0	0	2	4	0	0	0	6	8	0	10	4	76
d__Archaea	k__unclassified_d__Archaea	p__Euryarchaeota	c__Methanobacteria	o__Methanobacteriales	f__Methanobacteriaceae	g__Methanobacterium	s__Methanobacterium_cahuitense	10	4	8	0	0	0	0	0	0	0	4	0	0	0	0	0	0	0	0	0	0	0	0	0	0	0	0	0	0	4	16	20	8	10	24	12	120
d__Archaea	k__unclassified_d__Archaea	p__Euryarchaeota	c__Methanobacteria	o__Methanobacteriales	f__Methanobacteriaceae	g__Methanobacterium	s__Methanobacterium_congolense	28	20	24	40	40	50	74	46	66	44	64	40	132	100	72	88	108	88	68	26	58	20	12	10	34	58	34	56	12	68	106	80	72	148	128	144	2258
d__Archaea	k__unclassified_d__Archaea	p__Euryarchaeota	c__Methanobacteria	o__Methanobacteriales	f__Methanobacteriaceae	g__Methanobacterium	s__Methanobacterium_ferruginis	54	50	36	24	36	18	34	22	30	54	60	40	26	32	28	36	18	34	46	16	22	8	12	8	58	34	36	96	48	148	120	142	148	216	134	184	2108
d__Archaea	k__unclassified_d__Archaea	p__Euryarchaeota	c__Methanobacteria	o__Methanobacteriales	f__Methanobacteriaceae	g__Methanobacterium	s__Methanobacterium_formicicum	102	68	98	122	94	124	114	120	152	132	160	108	200	144	96	178	144	138	116	70	64	56	40	42	246	258	240	286	252	350	398	258	280	508	488	366	6612
d__Archaea	k__unclassified_d__Archaea	p__Euryarchaeota	c__Methanobacteria	o__Methanobacteriales	f__Methanobacteriaceae	g__Methanobacterium	s__Methanobacterium_lacus	10	6	4	4	8	6	8	6	10	22	32	18	4	32	0	8	0	6	6	18	6	6	8	2	20	26	28	62	32	58	20	28	12	36	10	24	586
d__Archaea	k__unclassified_d__Archaea	p__Euryarchaeota	c__Methanobacteria	o__Methanobacteriales	f__Methanobacteriaceae	g__Methanobacterium	s__Methanobacterium_oryzae	0	0	0	0	0	0	0	2	0	0	0	0	0	0	0	2	0	0	0	0	0	0	0	0	0	0	0	0	0	0	6	0	0	2	6	0	18
d__Archaea	k__unclassified_d__Archaea	p__Euryarchaeota	c__Methanobacteria	o__Methanobacteriales	f__Methanobacteriaceae	g__Methanobacterium	s__Methanobacterium_paludis	112	90	144	254	176	238	320	318	348	402	438	350	90	94	86	86	42	152	108	170	142	90	66	54	206	134	166	534	204	500	202	162	134	198	184	210	7204
d__Archaea	k__unclassified_d__Archaea	p__Euryarchaeota	c__Methanobacteria	o__Methanobacteriales	f__Methanobacteriaceae	g__Methanobacterium	s__Methanobacterium_palustre	0	0	0	0	0	0	0	0	0	0	0	0	0	0	0	0	0	0	0	0	0	0	0	0	0	0	0	0	0	0	6	4	0	2	4	4	20
d__Archaea	k__unclassified_d__Archaea	p__Euryarchaeota	c__Methanobacteria	o__Methanobacteriales	f__Methanobacteriaceae	g__Methanobacterium	s__Methanobacterium_petrolearium	48	44	36	96	134	168	120	158	168	150	172	112	188	150	126	106	96	88	238	188	244	272	100	92	312	304	256	216	272	296	682	616	516	792	702	688	8946
d__Archaea	k__unclassified_d__Archaea	p__Euryarchaeota	c__Methanobacteria	o__Methanobacteriales	f__Methanobacteriaceae	g__Methanobacterium	s__Methanobacterium_sp.	1182	882	1024	1224	1124	1410	1566	1522	1702	1532	1828	1532	1288	998	762	868	766	878	1432	1250	1678	1078	712	470	1878	1686	1720	1764	1464	2476	7706	7102	6730	11180	8564	9014	89992
d__Archaea	k__unclassified_d__Archaea	p__Euryarchaeota	c__Methanobacteria	o__Methanobacteriales	f__Methanobacteriaceae	g__Methanobacterium	s__Methanobacterium_sp._42_16	6	8	2	0	0	0	0	0	0	0	0	0	0	0	0	0	0	2	4	6	0	0	0	0	8	0	2	0	0	0	32	14	20	8	20	22	154
d__Archaea	k__unclassified_d__Archaea	p__Euryarchaeota	c__Methanobacteria	o__Methanobacteriales	f__Methanobacteriaceae	g__Methanobacterium	s__Methanobacterium_sp._A39	4	0	6	10	10	4	20	4	14	0	4	2	18	30	34	16	12	38	4	18	26	2	0	0	2	4	2	2	2	18	42	22	28	52	54	30	534
d__Archaea	k__unclassified_d__Archaea	p__Euryarchaeota	c__Methanobacteria	o__Methanobacteriales	f__Methanobacteriaceae	g__Methanobacterium	s__Methanobacterium_sp._BAmetb5	36	22	36	26	16	38	26	34	26	18	24	16	64	74	44	52	66	52	56	28	46	8	4	26	16	34	28	46	20	58	88	98	116	130	116	114	1702
d__Archaea	k__unclassified_d__Archaea	p__Euryarchaeota	c__Methanobacteria	o__Methanobacteriales	f__Methanobacteriaceae	g__Methanobacterium	s__Methanobacterium_sp._BRmetb2	38	14	8	72	44	82	90	98	152	34	40	42	62	48	56	112	112	60	58	32	66	54	36	36	182	166	174	192	118	240	92	82	48	104	88	106	3038
d__Archaea	k__unclassified_d__Archaea	p__Euryarchaeota	c__Methanobacteria	o__Methanobacteriales	f__Methanobacteriaceae	g__Methanobacterium	s__Methanobacterium_sp._CWC-01	2148	1480	1924	304	228	344	370	370	496	408	446	490	280	244	158	208	76	212	192	248	286	234	140	108	410	372	358	308	304	716	8624	8198	7314	12888	10112	9332	70330
d__Archaea	k__unclassified_d__Archaea	p__Euryarchaeota	c__Methanobacteria	o__Methanobacteriales	f__Methanobacteriaceae	g__Methanobacterium	s__Methanobacterium_sp._ERen5	24	12	10	6	2	6	8	14	16	8	20	4	52	16	12	22	18	12	24	20	14	8	10	6	24	48	36	42	24	24	72	48	54	50	38	46	850
d__Archaea	k__unclassified_d__Archaea	p__Euryarchaeota	c__Methanobacteria	o__Methanobacteriales	f__Methanobacteriaceae	g__Methanobacterium	s__Methanobacterium_sp._MB1	18	20	22	0	18	6	10	10	18	8	12	8	38	42	14	28	86	26	18	4	6	10	34	28	8	8	4	30	32	12	8	16	12	16	20	14	664
d__Archaea	k__unclassified_d__Archaea	p__Euryarchaeota	c__Methanobacteria	o__Methanobacteriales	f__Methanobacteriaceae	g__Methanobacterium	s__Methanobacterium_sp._MZ-A1	6	10	20	14	12	22	22	14	20	6	2	12	12	16	4	10	10	2	14	8	14	14	12	4	12	24	22	10	10	14	28	24	34	22	26	44	550
d__Archaea	k__unclassified_d__Archaea	p__Euryarchaeota	c__Methanobacteria	o__Methanobacteriales	f__Methanobacteriaceae	g__Methanobacterium	s__Methanobacterium_sp._Maddingley_MBC34	44	20	40	22	16	32	28	38	12	60	60	44	74	74	72	40	16	36	28	32	32	14	16	18	38	52	42	18	44	66	156	150	104	236	262	180	2216
d__Archaea	k__unclassified_d__Archaea	p__Euryarchaeota	c__Methanobacteria	o__Methanobacteriales	f__Methanobacteriaceae	g__Methanobacterium	s__Methanobacterium_sp._PtaB.Bin024	74	38	56	22	52	48	92	34	46	40	36	42	44	92	20	26	42	54	26	8	28	18	22	10	34	38	20	112	48	124	392	368	292	662	432	472	3964
d__Archaea	k__unclassified_d__Archaea	p__Euryarchaeota	c__Methanobacteria	o__Methanobacteriales	f__Methanobacteriaceae	g__Methanobacterium	s__Methanobacterium_sp._PtaU1.Bin097	32	36	24	14	12	26	6	16	34	4	10	12	22	32	58	14	24	22	8	2	2	0	2	2	2	4	2	18	22	28	700	606	598	1122	782	950	5248
d__Archaea	k__unclassified_d__Archaea	p__Euryarchaeota	c__Methanobacteria	o__Methanobacteriales	f__Methanobacteriaceae	g__Methanobacterium	s__Methanobacterium_sp._PtaU1.Bin242	118	92	68	58	46	94	70	50	74	40	42	38	48	40	22	20	58	32	16	26	22	22	14	20	6	12	10	4	10	16	278	302	250	460	328	322	3128
d__Archaea	k__unclassified_d__Archaea	p__Euryarchaeota	c__Methanobacteria	o__Methanobacteriales	f__Methanobacteriaceae	g__Methanobacterium	s__Methanobacterium_sp._SMA-27	68	54	46	104	68	130	118	112	180	112	120	94	118	52	22	40	38	64	96	78	66	104	18	6	238	170	226	188	128	208	72	86	104	84	102	118	3632
d__Archaea	k__unclassified_d__Archaea	p__Euryarchaeota	c__Methanobacteria	o__Methanobacteriales	f__Methanobacteriaceae	g__Methanobacterium	s__Methanobacterium_sp._YSL	0	0	0	0	0	0	0	0	0	0	0	0	0	0	0	0	0	0	6	12	2	30	0	8	2	0	2	4	2	10	16	12	14	14	18	18	170
d__Archaea	k__unclassified_d__Archaea	p__Euryarchaeota	c__Methanobacteria	o__Methanobacteriales	f__Methanobacteriaceae	g__Methanobacterium	s__Methanobacterium_spitsbergense	22	36	38	80	58	72	56	78	64	88	100	68	82	32	24	28	18	32	30	42	28	10	10	14	66	42	44	96	34	138	34	42	42	36	56	44	1784
d__Archaea	k__unclassified_d__Archaea	p__Euryarchaeota	c__Methanobacteria	o__Methanobacteriales	f__Methanobacteriaceae	g__Methanobacterium	s__Methanobacterium_subterraneum	18	0	10	34	38	62	62	62	70	50	62	38	48	62	34	14	30	38	66	56	50	56	30	28	74	80	84	80	60	170	126	92	136	152	186	144	2402
d__Archaea	k__unclassified_d__Archaea	p__Euryarchaeota	c__Methanobacteria	o__Methanobacteriales	f__Methanobacteriaceae	g__Methanobacterium	s__Methanobacterium_veterum	0	0	0	0	0	0	0	0	0	0	0	0	2	6	0	0	0	4	0	0	0	2	0	2	0	4	4	4	4	2	10	6	2	34	16	28	130
d__Archaea	k__unclassified_d__Archaea	p__Euryarchaeota	c__Methanobacteria	o__Methanobacteriales	f__Methanobacteriaceae	g__Methanobrevibacter	s__Methanobrevibacter_arboriphilus	2	6	18	10	4	22	26	22	28	10	20	10	16	10	0	16	38	6	2	6	10	2	0	0	14	4	8	10	20	28	32	22	18	30	8	24	502
d__Archaea	k__unclassified_d__Archaea	p__Euryarchaeota	c__Methanobacteria	o__Methanobacteriales	f__Methanobacteriaceae	g__Methanobrevibacter	s__Methanobrevibacter_boviskoreani	0	0	0	0	2	0	2	4	0	2	4	2	0	0	0	0	0	0	0	0	6	6	0	0	0	0	0	14	8	0	0	0	0	0	0	2	52
d__Archaea	k__unclassified_d__Archaea	p__Euryarchaeota	c__Methanobacteria	o__Methanobacteriales	f__Methanobacteriaceae	g__Methanobrevibacter	s__Methanobrevibacter_curvatus	4	8	2	4	0	0	2	0	2	10	0	0	4	14	10	30	8	10	2	0	0	0	0	0	0	0	0	12	2	2	2	4	8	6	8	6	160
d__Archaea	k__unclassified_d__Archaea	p__Euryarchaeota	c__Methanobacteria	o__Methanobacteriales	f__Methanobacteriaceae	g__Methanobrevibacter	s__Methanobrevibacter_cuticularis	14	6	2	0	0	0	0	2	0	0	2	0	0	0	0	0	4	2	0	0	0	0	0	0	0	0	0	0	0	0	0	2	2	2	0	2	40
d__Archaea	k__unclassified_d__Archaea	p__Euryarchaeota	c__Methanobacteria	o__Methanobacteriales	f__Methanobacteriaceae	g__Methanobrevibacter	s__Methanobrevibacter_filiformis	0	10	2	4	0	4	0	2	0	0	0	10	2	8	16	12	12	8	0	0	0	0	0	0	4	4	10	0	0	2	0	6	6	0	0	2	124
d__Archaea	k__unclassified_d__Archaea	p__Euryarchaeota	c__Methanobacteria	o__Methanobacteriales	f__Methanobacteriaceae	g__Methanobrevibacter	s__Methanobrevibacter_millerae	0	0	2	20	12	24	22	16	8	20	32	12	16	4	4	6	0	6	4	0	0	0	6	6	0	0	0	6	0	18	12	8	2	2	10	6	284
d__Archaea	k__unclassified_d__Archaea	p__Euryarchaeota	c__Methanobacteria	o__Methanobacteriales	f__Methanobacteriaceae	g__Methanobrevibacter	s__Methanobrevibacter_olleyae	0	0	0	0	0	0	0	0	0	0	0	2	0	0	0	0	0	0	0	2	2	2	0	0	10	0	0	6	2	8	8	6	18	26	6	8	106
d__Archaea	k__unclassified_d__Archaea	p__Euryarchaeota	c__Methanobacteria	o__Methanobacteriales	f__Methanobacteriaceae	g__Methanobrevibacter	s__Methanobrevibacter_oralis	0	0	4	0	0	2	0	0	0	0	0	0	0	2	0	0	0	0	0	0	0	0	0	0	0	0	0	0	0	0	0	0	0	0	0	0	8
d__Archaea	k__unclassified_d__Archaea	p__Euryarchaeota	c__Methanobacteria	o__Methanobacteriales	f__Methanobacteriaceae	g__Methanobrevibacter	s__Methanobrevibacter_ruminantium	0	0	0	6	0	2	0	0	0	0	2	2	0	0	0	0	0	0	0	0	0	0	0	0	10	2	4	0	2	0	0	0	0	0	0	0	30
d__Archaea	k__unclassified_d__Archaea	p__Euryarchaeota	c__Methanobacteria	o__Methanobacteriales	f__Methanobacteriaceae	g__Methanobrevibacter	s__Methanobrevibacter_smithii	4	2	0	8	6	8	2	6	14	8	4	8	6	0	0	2	0	0	0	0	0	0	0	0	14	12	2	2	0	0	0	0	0	2	0	0	110
d__Archaea	k__unclassified_d__Archaea	p__Euryarchaeota	c__Methanobacteria	o__Methanobacteriales	f__Methanobacteriaceae	g__Methanobrevibacter	s__Methanobrevibacter_sp.	132	58	92	140	140	134	114	116	158	128	126	96	152	134	122	226	446	140	108	114	134	106	176	102	188	130	190	742	292	550	240	186	224	296	268	230	6930
d__Archaea	k__unclassified_d__Archaea	p__Euryarchaeota	c__Methanobacteria	o__Methanobacteriales	f__Methanobacteriaceae	g__Methanobrevibacter	s__Methanobrevibacter_sp._87.7	0	2	2	8	2	6	14	2	10	4	4	6	4	10	0	2	0	4	0	2	0	0	0	0	2	0	2	0	0	0	0	4	2	0	2	0	94
d__Archaea	k__unclassified_d__Archaea	p__Euryarchaeota	c__Methanobacteria	o__Methanobacteriales	f__Methanobacteriaceae	g__Methanobrevibacter	s__Methanobrevibacter_sp._AbM4	0	0	0	0	0	0	0	0	0	0	0	0	0	0	0	0	0	0	0	0	0	0	0	0	0	0	2	0	0	0	0	0	0	4	8	4	18
d__Archaea	k__unclassified_d__Archaea	p__Euryarchaeota	c__Methanobacteria	o__Methanobacteriales	f__Methanobacteriaceae	g__Methanobrevibacter	s__Methanobrevibacter_sp._NOE	0	0	0	0	0	0	4	0	2	0	0	0	0	0	0	0	0	0	2	4	0	6	2	2	0	0	0	0	0	2	0	0	0	0	0	0	24
d__Archaea	k__unclassified_d__Archaea	p__Euryarchaeota	c__Methanobacteria	o__Methanobacteriales	f__Methanobacteriaceae	g__Methanobrevibacter	s__Methanobrevibacter_sp._OttesenSCG-928-I08	0	0	0	0	0	0	0	0	0	0	0	0	0	0	0	0	0	0	0	0	0	0	0	0	0	0	0	0	0	0	0	2	4	0	0	0	6
d__Archaea	k__unclassified_d__Archaea	p__Euryarchaeota	c__Methanobacteria	o__Methanobacteriales	f__Methanobacteriaceae	g__Methanobrevibacter	s__Methanobrevibacter_sp._OttesenSCG-928-K11	4	4	8	0	2	0	0	0	0	8	6	0	2	6	4	2	8	2	0	0	0	0	0	0	2	4	0	12	6	2	6	6	0	2	8	4	108
d__Archaea	k__unclassified_d__Archaea	p__Euryarchaeota	c__Methanobacteria	o__Methanobacteriales	f__Methanobacteriaceae	g__Methanobrevibacter	s__Methanobrevibacter_sp._TMH8	2	2	0	58	10	34	54	74	34	116	70	50	8	8	4	4	0	10	0	0	0	0	0	0	0	0	0	4	0	6	0	2	0	0	0	2	552
d__Archaea	k__unclassified_d__Archaea	p__Euryarchaeota	c__Methanobacteria	o__Methanobacteriales	f__Methanobacteriaceae	g__Methanobrevibacter	s__Methanobrevibacter_sp._UBA212	0	0	2	0	0	0	0	0	0	0	0	0	0	8	10	2	0	4	0	0	0	0	0	2	0	0	0	4	0	0	2	0	6	4	0	6	50
d__Archaea	k__unclassified_d__Archaea	p__Euryarchaeota	c__Methanobacteria	o__Methanobacteriales	f__Methanobacteriaceae	g__Methanobrevibacter	s__Methanobrevibacter_sp._YE315	6	4	0	0	0	0	0	2	4	0	2	0	28	24	20	22	18	14	0	0	0	0	0	0	0	0	0	0	0	0	0	2	0	0	6	0	152
d__Archaea	k__unclassified_d__Archaea	p__Euryarchaeota	c__Methanobacteria	o__Methanobacteriales	f__Methanobacteriaceae	g__Methanobrevibacter	s__Methanobrevibacter_thaueri	2	12	2	0	0	0	0	8	0	0	0	2	0	10	0	8	12	0	6	0	6	0	0	0	6	0	2	6	4	6	0	0	0	0	0	2	94
d__Archaea	k__unclassified_d__Archaea	p__Euryarchaeota	c__Methanobacteria	o__Methanobacteriales	f__Methanobacteriaceae	g__Methanobrevibacter	s__Methanobrevibacter_woesei	0	2	2	2	0	4	4	12	0	0	2	2	6	4	0	0	10	10	0	0	0	0	0	0	2	22	2	4	4	8	2	0	0	2	0	4	110
d__Archaea	k__unclassified_d__Archaea	p__Euryarchaeota	c__Methanobacteria	o__Methanobacteriales	f__Methanobacteriaceae	g__Methanobrevibacter	s__Methanobrevibacter_wolinii	8	6	4	16	2	0	6	8	12	8	8	4	38	26	20	54	70	42	0	0	0	0	0	0	0	0	2	0	0	0	12	14	26	28	12	18	444
d__Archaea	k__unclassified_d__Archaea	p__Euryarchaeota	c__Methanobacteria	o__Methanobacteriales	f__Methanobacteriaceae	g__Methanosphaera	s__Methanosphaera_cuniculi	8	4	4	8	12	6	8	4	12	4	2	4	18	18	16	2	12	10	8	12	12	20	6	14	18	10	12	18	10	22	28	10	20	22	18	10	422
d__Archaea	k__unclassified_d__Archaea	p__Euryarchaeota	c__Methanobacteria	o__Methanobacteriales	f__Methanobacteriaceae	g__Methanosphaera	s__Methanosphaera_sp.	46	30	60	8	22	30	10	12	42	6	26	8	32	34	16	24	40	10	16	16	18	12	22	10	22	8	18	10	24	28	16	34	30	24	28	26	818
d__Archaea	k__unclassified_d__Archaea	p__Euryarchaeota	c__Methanobacteria	o__Methanobacteriales	f__Methanobacteriaceae	g__Methanosphaera	s__Methanosphaera_sp._A6	0	0	0	0	0	0	0	0	0	0	0	0	0	0	0	0	0	0	0	0	0	0	0	0	0	0	0	8	2	4	0	0	0	0	0	0	14
d__Archaea	k__unclassified_d__Archaea	p__Euryarchaeota	c__Methanobacteria	o__Methanobacteriales	f__Methanobacteriaceae	g__Methanosphaera	s__Methanosphaera_sp._BMS	2	0	0	4	0	0	0	2	0	0	0	0	0	0	4	0	0	2	0	0	0	0	10	0	6	4	0	6	2	10	4	2	2	6	2	2	70
d__Archaea	k__unclassified_d__Archaea	p__Euryarchaeota	c__Methanobacteria	o__Methanobacteriales	f__Methanobacteriaceae	g__Methanosphaera	s__Methanosphaera_sp._SHI1033	0	0	0	0	0	2	0	0	0	0	0	0	0	0	0	0	0	0	2	0	0	0	10	0	0	0	0	0	0	0	0	0	0	0	0	0	14
d__Archaea	k__unclassified_d__Archaea	p__Euryarchaeota	c__Methanobacteria	o__Methanobacteriales	f__Methanobacteriaceae	g__Methanosphaera	s__Methanosphaera_sp._SHI613	0	0	0	2	2	4	8	8	4	0	0	0	0	4	0	0	0	2	0	0	0	0	0	0	0	0	0	0	0	0	0	0	0	0	0	2	36
d__Archaea	k__unclassified_d__Archaea	p__Euryarchaeota	c__Methanobacteria	o__Methanobacteriales	f__Methanobacteriaceae	g__Methanosphaera	s__Methanosphaera_sp._Vir-13MRS	6	6	4	0	0	0	0	0	0	0	0	0	0	0	0	0	0	0	0	0	0	0	0	0	0	0	0	4	0	12	2	10	4	4	0	2	54
d__Archaea	k__unclassified_d__Archaea	p__Euryarchaeota	c__Methanobacteria	o__Methanobacteriales	f__Methanobacteriaceae	g__Methanosphaera	s__Methanosphaera_sp._WGK6	0	0	0	2	2	4	4	4	6	4	14	0	0	0	0	0	0	4	0	0	0	0	10	0	2	0	0	0	2	0	0	0	2	2	10	2	74
d__Archaea	k__unclassified_d__Archaea	p__Euryarchaeota	c__Methanobacteria	o__Methanobacteriales	f__Methanobacteriaceae	g__Methanosphaera	s__Methanosphaera_sp._rholeuAM130	0	0	0	6	0	0	14	0	0	4	10	4	4	0	0	0	0	0	4	4	0	0	0	0	22	12	14	10	24	22	0	0	0	0	0	0	154
d__Archaea	k__unclassified_d__Archaea	p__Euryarchaeota	c__Methanobacteria	o__Methanobacteriales	f__Methanobacteriaceae	g__Methanosphaera	s__Methanosphaera_sp._rholeuAM270	0	0	4	0	0	0	2	0	0	0	2	0	2	0	0	0	0	2	0	0	2	0	0	0	0	0	0	2	0	0	6	8	8	12	22	8	80
d__Archaea	k__unclassified_d__Archaea	p__Euryarchaeota	c__Methanobacteria	o__Methanobacteriales	f__Methanobacteriaceae	g__Methanosphaera	s__Methanosphaera_sp._rholeuAM6	12	4	4	4	0	6	0	0	10	0	4	2	8	6	0	2	0	0	0	0	0	0	0	0	0	0	0	0	0	0	2	0	0	0	0	0	64
d__Archaea	k__unclassified_d__Archaea	p__Euryarchaeota	c__Methanobacteria	o__Methanobacteriales	f__Methanobacteriaceae	g__Methanosphaera	s__Methanosphaera_sp._rholeuAM74	0	0	0	2	4	2	0	6	0	2	2	4	0	0	0	2	0	0	8	0	2	0	0	0	8	6	6	6	6	18	0	2	0	0	0	0	86
d__Archaea	k__unclassified_d__Archaea	p__Euryarchaeota	c__Methanobacteria	o__Methanobacteriales	f__Methanobacteriaceae	g__Methanosphaera	s__Methanosphaera_stadtmanae	2	4	10	12	6	2	8	0	12	2	0	2	4	12	16	2	0	0	10	18	12	6	10	34	16	16	4	36	32	24	18	16	28	10	38	14	436
d__Archaea	k__unclassified_d__Archaea	p__Euryarchaeota	c__Methanobacteria	o__Methanobacteriales	f__Methanobacteriaceae	g__Methanothermobacter	s__Methanothermobacter_defluvii	0	0	0	16	16	12	26	20	6	24	30	10	8	4	0	2	0	10	0	0	0	0	0	0	0	0	0	0	0	0	2	0	4	0	2	0	192
d__Archaea	k__unclassified_d__Archaea	p__Euryarchaeota	c__Methanobacteria	o__Methanobacteriales	f__Methanobacteriaceae	g__Methanothermobacter	s__Methanothermobacter_marburgensis	12	6	10	12	26	56	38	32	38	54	70	44	14	8	2	18	4	6	8	0	2	0	4	0	14	8	12	2	8	18	2	12	2	10	6	6	564
d__Archaea	k__unclassified_d__Archaea	p__Euryarchaeota	c__Methanobacteria	o__Methanobacteriales	f__Methanobacteriaceae	g__Methanothermobacter	s__Methanothermobacter_sp.	126	134	144	126	74	150	154	110	164	134	126	116	140	136	70	92	174	96	116	82	102	96	44	44	218	154	120	336	176	340	114	106	162	172	196	134	4978
d__Archaea	k__unclassified_d__Archaea	p__Euryarchaeota	c__Methanobacteria	o__Methanobacteriales	f__Methanobacteriaceae	g__Methanothermobacter	s__Methanothermobacter_sp._CaT2	12	10	12	2	0	8	6	32	2	24	6	6	0	2	0	10	6	6	0	0	0	0	0	14	6	0	0	6	6	44	2	8	2	4	10	4	250
d__Archaea	k__unclassified_d__Archaea	p__Euryarchaeota	c__Methanobacteria	o__Methanobacteriales	f__Methanobacteriaceae	g__Methanothermobacter	s__Methanothermobacter_sp._EMTCatA1	0	0	0	2	2	0	0	2	2	4	8	0	2	0	0	0	0	2	0	0	0	0	0	0	0	0	0	0	0	0	0	0	0	0	4	4	32
d__Archaea	k__unclassified_d__Archaea	p__Euryarchaeota	c__Methanobacteria	o__Methanobacteriales	f__Methanobacteriaceae	g__Methanothermobacter	s__Methanothermobacter_sp._K4	2	2	4	4	20	24	18	16	14	14	10	20	6	24	10	18	32	10	0	0	0	4	40	28	8	2	10	10	2	12	16	10	18	12	26	4	450
d__Archaea	k__unclassified_d__Archaea	p__Euryarchaeota	c__Methanobacteria	o__Methanobacteriales	f__Methanobacteriaceae	g__Methanothermobacter	s__Methanothermobacter_sp._KEPCO-1	0	0	0	0	0	0	0	0	0	0	0	0	0	0	0	0	0	0	4	8	6	4	0	0	4	0	0	20	12	10	0	0	0	0	2	0	70
d__Archaea	k__unclassified_d__Archaea	p__Euryarchaeota	c__Methanobacteria	o__Methanobacteriales	f__Methanobacteriaceae	g__Methanothermobacter	s__Methanothermobacter_sp._MT-2	10	4	6	2	6	10	14	0	6	18	34	8	2	10	2	2	2	2	14	8	2	18	6	0	16	4	2	22	14	22	2	8	4	6	4	6	296
d__Archaea	k__unclassified_d__Archaea	p__Euryarchaeota	c__Methanobacteria	o__Methanobacteriales	f__Methanobacteriaceae	g__Methanothermobacter	s__Methanothermobacter_sp._THM-1	0	0	0	0	0	4	0	0	0	8	14	0	0	0	2	0	0	0	0	0	0	2	0	0	14	16	4	14	14	28	0	0	0	0	0	0	120
d__Archaea	k__unclassified_d__Archaea	p__Euryarchaeota	c__Methanobacteria	o__Methanobacteriales	f__Methanobacteriaceae	g__Methanothermobacter	s__Methanothermobacter_sp._THM-2	0	0	0	6	4	18	6	10	4	12	8	10	6	0	8	4	0	0	0	0	10	0	0	0	0	0	2	8	0	0	0	2	2	12	2	2	136
d__Archaea	k__unclassified_d__Archaea	p__Euryarchaeota	c__Methanobacteria	o__Methanobacteriales	f__Methanobacteriaceae	g__Methanothermobacter	s__Methanothermobacter_tenebrarum	8	8	6	4	8	4	2	0	0	6	10	2	24	6	22	22	24	20	14	6	12	14	14	6	22	26	18	50	30	46	14	8	12	4	12	6	490
d__Archaea	k__unclassified_d__Archaea	p__Euryarchaeota	c__Methanobacteria	o__Methanobacteriales	f__Methanobacteriaceae	g__Methanothermobacter	s__Methanothermobacter_thermautotrophicus	62	30	46	66	68	90	130	164	112	222	234	172	60	54	26	44	66	98	14	4	12	14	12	14	24	26	34	38	32	58	16	10	10	28	18	16	2124
d__Archaea	k__unclassified_d__Archaea	p__Euryarchaeota	c__Methanobacteria	o__Methanobacteriales	f__Methanobacteriaceae	g__Methanothermobacter	s__Methanothermobacter_wolfeii	38	18	20	36	18	30	54	36	32	42	32	22	116	36	46	30	24	12	112	74	116	68	58	42	82	48	64	56	66	62	46	36	70	70	44	48	1804
d__Archaea	k__unclassified_d__Archaea	p__Euryarchaeota	c__Methanobacteria	o__Methanobacteriales	f__Methanobacteriaceae	g__unclassified_f__Methanobacteriaceae	s__Methanobacteriaceae_archaeon	1076	932	916	516	456	572	626	540	906	492	640	602	1180	1056	700	730	610	764	504	572	646	526	266	198	908	842	830	876	676	1342	4088	3920	3930	6268	4646	4996	49348
d__Archaea	k__unclassified_d__Archaea	p__Euryarchaeota	c__Methanobacteria	o__Methanobacteriales	f__Methanobacteriaceae	g__unclassified_f__Methanobacteriaceae	s__Methanobacteriaceae_archaeon_41_258	0	0	0	0	0	6	8	2	0	4	8	8	0	0	0	0	0	0	0	0	0	0	0	4	0	10	0	6	16	0	0	0	0	0	0	0	72
d__Archaea	k__unclassified_d__Archaea	p__Euryarchaeota	c__Methanobacteria	o__Methanobacteriales	f__Methanothermaceae	g__Methanothermus	s__Methanothermus_fervidus	2	0	14	4	2	2	4	4	4	16	10	10	0	0	0	2	0	2	12	8	30	0	4	14	6	4	10	18	4	26	2	4	4	2	8	0	232
d__Archaea	k__unclassified_d__Archaea	p__Euryarchaeota	c__Methanobacteria	o__Methanobacteriales	f__unclassified_o__Methanobacteriales	g__unclassified_o__Methanobacteriales	s__Methanobacteriales_archaeon	966	678	962	36	48	44	46	44	36	76	122	80	36	30	20	18	8	32	6	16	14	46	8	20	54	52	24	60	52	164	2968	2606	2404	4268	3374	2994	22412
d__Archaea	k__unclassified_d__Archaea	p__Euryarchaeota	c__Methanobacteria	o__Methanobacteriales	f__unclassified_o__Methanobacteriales	g__unclassified_o__Methanobacteriales	s__Methanobacteriales_archaeon_HGW-Methanobacteriales-1	172	86	122	120	144	204	168	260	204	200	270	156	158	100	78	114	68	120	112	102	112	54	48	28	164	124	114	226	148	260	158	126	138	160	214	212	5244
d__Archaea	k__unclassified_d__Archaea	p__Euryarchaeota	c__Methanobacteria	o__Methanobacteriales	f__unclassified_o__Methanobacteriales	g__unclassified_o__Methanobacteriales	s__Methanobacteriales_archaeon_HGW-Methanobacteriales-2	12	6	4	22	0	10	6	16	10	6	20	16	4	4	10	20	30	26	14	8	12	2	2	8	32	8	16	52	24	28	66	58	60	118	80	78	888
d__Archaea	k__unclassified_d__Archaea	p__Euryarchaeota	c__Methanococci	o__Methanococcales	f__Methanocaldococcaceae	g__Methanocaldococcus	s__Methanocaldococcus_bathoardescens	88	88	118	122	88	104	142	116	136	88	132	94	118	90	126	196	126	186	76	54	64	70	58	98	68	78	62	64	88	98	100	94	96	136	152	160	3774
d__Archaea	k__unclassified_d__Archaea	p__Euryarchaeota	c__Methanococci	o__Methanococcales	f__Methanocaldococcaceae	g__Methanocaldococcus	s__Methanocaldococcus_fervens	22	28	8	12	8	10	10	8	8	38	80	46	8	12	4	22	18	10	0	2	2	6	2	2	12	14	4	0	4	2	10	8	14	18	6	4	462
d__Archaea	k__unclassified_d__Archaea	p__Euryarchaeota	c__Methanococci	o__Methanococcales	f__Methanocaldococcaceae	g__Methanocaldococcus	s__Methanocaldococcus_infernus	2	0	0	4	4	6	2	0	8	2	4	4	14	0	4	22	6	24	0	0	2	0	0	0	16	6	2	6	4	28	4	0	4	0	2	4	184
d__Archaea	k__unclassified_d__Archaea	p__Euryarchaeota	c__Methanococci	o__Methanococcales	f__Methanocaldococcaceae	g__Methanocaldococcus	s__Methanocaldococcus_jannaschii	6	0	0	6	4	10	2	8	8	16	12	6	6	22	18	36	28	10	0	2	4	4	0	4	48	38	16	66	52	118	12	12	16	28	32	30	680
d__Archaea	k__unclassified_d__Archaea	p__Euryarchaeota	c__Methanococci	o__Methanococcales	f__Methanocaldococcaceae	g__Methanocaldococcus	s__Methanocaldococcus_lauensis	6	6	2	0	10	2	4	10	10	8	8	4	12	12	8	12	4	12	6	8	10	14	6	14	28	26	24	26	22	34	28	20	24	22	18	24	484
d__Archaea	k__unclassified_d__Archaea	p__Euryarchaeota	c__Methanococci	o__Methanococcales	f__Methanocaldococcaceae	g__Methanocaldococcus	s__Methanocaldococcus_sp.	22	8	16	4	6	4	0	6	0	6	8	2	6	2	8	0	2	6	8	2	12	0	2	0	0	0	0	8	0	4	0	2	0	4	0	0	148
d__Archaea	k__unclassified_d__Archaea	p__Euryarchaeota	c__Methanococci	o__Methanococcales	f__Methanocaldococcaceae	g__Methanocaldococcus	s__Methanocaldococcus_sp._FS406-22	4	2	6	0	4	10	10	6	6	2	6	2	18	20	22	4	6	4	6	10	16	0	0	2	38	14	8	94	26	84	14	18	14	18	12	6	512
d__Archaea	k__unclassified_d__Archaea	p__Euryarchaeota	c__Methanococci	o__Methanococcales	f__Methanocaldococcaceae	g__Methanocaldococcus	s__Methanocaldococcus_villosus	0	0	0	0	0	0	0	0	0	0	0	0	0	0	0	0	0	0	0	0	0	0	0	6	12	2	4	32	14	48	0	0	0	0	0	0	118
d__Archaea	k__unclassified_d__Archaea	p__Euryarchaeota	c__Methanococci	o__Methanococcales	f__Methanocaldococcaceae	g__Methanocaldococcus	s__Methanocaldococcus_vulcanius	0	0	0	0	0	0	0	0	0	0	0	0	0	2	0	0	0	0	4	0	0	0	0	0	14	10	0	22	8	18	0	0	2	0	2	0	82
d__Archaea	k__unclassified_d__Archaea	p__Euryarchaeota	c__Methanococci	o__Methanococcales	f__Methanocaldococcaceae	g__Methanotorris	s__Methanotorris_formicicus	8	2	4	6	0	2	10	4	0	8	0	4	12	6	0	10	38	28	14	8	6	0	12	0	112	78	92	60	64	92	2	10	6	14	6	2	720
d__Archaea	k__unclassified_d__Archaea	p__Euryarchaeota	c__Methanococci	o__Methanococcales	f__Methanocaldococcaceae	g__Methanotorris	s__Methanotorris_igneus	38	10	18	18	28	22	14	18	16	40	20	34	16	34	28	24	18	26	2	8	2	10	10	2	20	40	22	12	16	10	8	4	8	20	6	0	622
d__Archaea	k__unclassified_d__Archaea	p__Euryarchaeota	c__Methanococci	o__Methanococcales	f__Methanococcaceae	g__Methanococcus	s__Methanococcus_aeolicus	0	0	2	0	6	8	2	12	2	12	10	14	4	14	18	8	26	0	0	0	0	0	0	0	0	0	0	0	0	4	12	2	2	0	0	2	160
d__Archaea	k__unclassified_d__Archaea	p__Euryarchaeota	c__Methanococci	o__Methanococcales	f__Methanococcaceae	g__Methanococcus	s__Methanococcus_maripaludis	24	18	36	82	78	92	80	104	122	82	64	78	116	68	62	70	260	96	50	36	58	18	14	8	48	62	50	132	56	128	70	54	42	52	46	78	2534
d__Archaea	k__unclassified_d__Archaea	p__Euryarchaeota	c__Methanococci	o__Methanococcales	f__Methanococcaceae	g__Methanococcus	s__Methanococcus_sp.	2	4	0	0	0	0	0	0	0	0	0	0	0	0	0	0	0	0	0	0	0	0	0	0	0	0	0	0	0	0	0	0	0	0	0	0	6
d__Archaea	k__unclassified_d__Archaea	p__Euryarchaeota	c__Methanococci	o__Methanococcales	f__Methanococcaceae	g__Methanococcus	s__Methanococcus_vannielii	0	0	0	0	12	0	0	0	0	0	0	0	0	0	4	0	2	0	2	0	2	0	0	0	4	0	0	2	2	0	0	0	0	2	0	0	32
d__Archaea	k__unclassified_d__Archaea	p__Euryarchaeota	c__Methanococci	o__Methanococcales	f__Methanococcaceae	g__Methanococcus	s__Methanococcus_voltae	2	2	0	26	12	26	10	6	8	6	4	10	2	6	2	0	26	2	0	4	12	0	2	4	10	6	6	20	16	8	0	6	4	6	4	2	260
d__Archaea	k__unclassified_d__Archaea	p__Euryarchaeota	c__Methanococci	o__Methanococcales	f__Methanococcaceae	g__Methanothermococcus	s__Methanothermococcus_okinawensis	80	24	40	16	24	22	34	30	34	46	28	12	36	30	22	22	20	40	20	24	44	22	2	12	54	30	62	90	28	68	26	22	26	26	24	16	1156
d__Archaea	k__unclassified_d__Archaea	p__Euryarchaeota	c__Methanococci	o__Methanococcales	f__Methanococcaceae	g__Methanothermococcus	s__Methanothermococcus_sp.	4	0	0	2	4	8	14	14	6	6	4	14	4	0	8	0	2	0	16	4	4	2	10	4	6	2	0	44	10	12	4	0	4	6	4	2	224
d__Archaea	k__unclassified_d__Archaea	p__Euryarchaeota	c__Methanococci	o__Methanococcales	f__Methanococcaceae	g__Methanothermococcus	s__Methanothermococcus_sp._SCGC_AD-155-C09	0	0	0	0	0	0	0	0	0	0	0	0	4	18	8	4	0	2	0	2	6	0	0	2	0	0	0	0	0	0	0	0	0	0	0	0	46
d__Archaea	k__unclassified_d__Archaea	p__Euryarchaeota	c__Methanococci	o__Methanococcales	f__Methanococcaceae	g__Methanothermococcus	s__Methanothermococcus_sp._SCGC_AD-155-E23	18	12	14	18	30	38	16	40	24	38	62	26	32	54	22	24	4	8	24	16	18	4	10	4	4	0	2	10	4	10	8	8	16	12	22	6	658
d__Archaea	k__unclassified_d__Archaea	p__Euryarchaeota	c__Methanococci	o__Methanococcales	f__Methanococcaceae	g__Methanothermococcus	s__Methanothermococcus_sp._SCGC_AD-155-M21	4	6	4	2	12	12	12	8	12	6	8	16	62	36	20	22	16	4	0	0	0	0	0	0	0	0	0	0	2	0	20	32	16	32	34	28	426
d__Archaea	k__unclassified_d__Archaea	p__Euryarchaeota	c__Methanococci	o__Methanococcales	f__Methanococcaceae	g__Methanothermococcus	s__Methanothermococcus_sp._SCGC_AD-155-N22	0	0	0	0	0	0	0	2	0	2	0	0	0	0	0	0	0	0	0	0	0	0	0	0	2	0	0	4	4	12	0	0	0	0	0	0	26
d__Archaea	k__unclassified_d__Archaea	p__Euryarchaeota	c__Methanococci	o__Methanococcales	f__Methanococcaceae	g__Methanothermococcus	s__Methanothermococcus_thermolithotrophicus	4	4	12	0	0	2	0	0	0	0	0	0	2	2	0	8	12	4	0	4	0	0	2	0	62	44	28	86	70	142	0	0	0	0	0	0	488
d__Archaea	k__unclassified_d__Archaea	p__Euryarchaeota	c__Methanococci	o__Methanococcales	f__Methanococcaceae	g__unclassified_f__Methanococcaceae	s__Methanococcaceae_archaeon	0	0	0	2	12	4	12	8	0	0	2	4	0	0	2	4	8	0	2	2	0	0	0	0	0	0	0	0	0	2	4	0	2	4	0	0	74
d__Archaea	k__unclassified_d__Archaea	p__Euryarchaeota	c__Methanococci	o__Methanococcales	f__unclassified_o__Methanococcales	g__Methanofervidicoccus	s__Methanofervidicoccus_abyssi	4	4	14	0	2	8	2	0	10	0	2	6	10	14	6	10	16	8	0	4	0	2	2	2	0	10	10	0	4	4	32	20	32	16	24	26	304
d__Archaea	k__unclassified_d__Archaea	p__Euryarchaeota	c__Methanococci	o__Methanococcales	f__unclassified_o__Methanococcales	g__Methanofervidicoccus	s__Methanofervidicoccus_sp._A16	40	26	22	6	18	14	30	4	20	20	36	12	16	14	10	4	12	22	10	0	2	0	0	0	2	2	4	4	0	4	14	24	0	12	12	2	418
d__Archaea	k__unclassified_d__Archaea	p__Euryarchaeota	c__Methanococci	o__Methanococcales	f__unclassified_o__Methanococcales	g__unclassified_o__Methanococcales	s__hyperthermophilic_methanogen_FS406-22	4	0	2	0	0	0	0	0	0	0	0	0	0	0	0	0	0	0	0	0	0	0	0	0	0	0	0	0	0	0	0	0	0	0	0	0	6
d__Archaea	k__unclassified_d__Archaea	p__Euryarchaeota	c__Methanococci	o__unclassified_c__Methanococci	f__unclassified_c__Methanococci	g__unclassified_c__Methanococci	s__Methanococci_archaeon	0	0	0	0	2	0	0	0	0	0	4	0	0	0	0	2	0	2	0	4	0	4	2	0	12	26	8	36	8	18	0	0	0	0	0	2	130
d__Archaea	k__unclassified_d__Archaea	p__Euryarchaeota	c__Methanomicrobia	o__Candidatus_Alkanophagales	f__unclassified_o__Candidatus_Alkanophagales	g__Candidatus_Alkanophaga	s__Candidatus_Alkanophaga_liquidiphilum	128	72	100	34	42	58	56	32	56	40	52	40	46	68	54	46	38	52	136	68	100	52	44	44	74	72	60	128	36	152	42	32	42	32	44	32	2204
d__Archaea	k__unclassified_d__Archaea	p__Euryarchaeota	c__Methanomicrobia	o__Candidatus_Alkanophagales	f__unclassified_o__Candidatus_Alkanophagales	g__Candidatus_Alkanophaga	s__Candidatus_Alkanophaga_volatiphilum	146	80	114	54	60	34	74	38	76	26	56	22	74	68	36	88	92	70	48	28	24	10	18	0	78	60	68	190	82	150	44	46	44	38	62	44	2242
d__Archaea	k__unclassified_d__Archaea	p__Euryarchaeota	c__Methanomicrobia	o__Candidatus_Alkanophagales	f__unclassified_o__Candidatus_Alkanophagales	g__unclassified_o__Candidatus_Alkanophagales	s__Candidatus_Alkanophagales_archaeon	416	462	422	340	342	446	432	332	544	392	518	396	626	570	354	420	476	424	480	414	624	246	228	182	474	386	420	456	274	580	432	376	346	390	392	426	15038
d__Archaea	k__unclassified_d__Archaea	p__Euryarchaeota	c__Methanomicrobia	o__Methanocellales	f__Methanocellaceae	g__Methanocella	s__Methanocella_arvoryzae	298	210	266	224	234	326	312	356	388	354	422	306	538	286	278	292	196	336	164	128	196	182	98	66	202	182	238	220	248	330	156	140	116	216	144	166	8814
d__Archaea	k__unclassified_d__Archaea	p__Euryarchaeota	c__Methanomicrobia	o__Methanocellales	f__Methanocellaceae	g__Methanocella	s__Methanocella_conradii	200	122	144	182	120	184	142	180	220	170	160	182	266	214	146	208	224	234	130	170	250	122	96	68	562	468	500	576	368	576	206	244	224	240	244	234	8576
d__Archaea	k__unclassified_d__Archaea	p__Euryarchaeota	c__Methanomicrobia	o__Methanocellales	f__Methanocellaceae	g__Methanocella	s__Methanocella_paludicola	372	310	316	476	332	578	574	660	488	520	602	448	502	422	298	346	226	354	250	144	288	122	118	92	192	168	194	158	144	290	190	220	184	282	230	196	11286
d__Archaea	k__unclassified_d__Archaea	p__Euryarchaeota	c__Methanomicrobia	o__Methanocellales	f__Methanocellaceae	g__Methanocella	s__Methanocella_sp._CWC-04	1382	1390	1104	3180	2816	3422	3372	4222	3518	2830	3248	2380	10798	5734	2966	6830	1920	6654	594	422	698	342	334	232	762	734	788	812	540	1084	736	684	574	694	712	712	79220
d__Archaea	k__unclassified_d__Archaea	p__Euryarchaeota	c__Methanomicrobia	o__Methanocellales	f__Methanocellaceae	g__Methanocella	s__Methanocella_sp._PtaU1.Bin125	328	382	260	374	360	480	530	544	508	540	660	480	1268	886	546	570	562	500	282	288	344	352	164	126	390	352	446	446	416	582	484	394	346	494	464	464	16612
d__Archaea	k__unclassified_d__Archaea	p__Euryarchaeota	c__Methanomicrobia	o__Methanocellales	f__unclassified_o__Methanocellales	g__unclassified_o__Methanocellales	s__Methanocellales_archaeon	666	486	630	550	534	638	704	630	834	640	832	594	676	650	386	750	634	614	562	456	670	280	252	152	850	664	638	892	494	1094	398	368	384	440	398	430	20870
d__Archaea	k__unclassified_d__Archaea	p__Euryarchaeota	c__Methanomicrobia	o__Methanomicrobiales	f__Methanocalculaceae	g__Methanocalculus	s__Methanocalculus_alkaliphilus	10	14	8	40	24	40	30	26	60	30	20	22	28	46	22	48	26	36	20	18	16	12	16	10	42	38	54	68	34	78	34	30	22	26	28	36	1112
d__Archaea	k__unclassified_d__Archaea	p__Euryarchaeota	c__Methanomicrobia	o__Methanomicrobiales	f__Methanocalculaceae	g__Methanocalculus	s__Methanocalculus_chunghsingensis	38	20	44	34	64	38	62	38	44	46	62	44	34	30	18	30	50	40	26	22	24	12	16	14	102	50	88	78	86	188	120	102	132	78	112	100	2086
d__Archaea	k__unclassified_d__Archaea	p__Euryarchaeota	c__Methanomicrobia	o__Methanomicrobiales	f__Methanocalculaceae	g__Methanocalculus	s__Methanocalculus_sp.	22	32	32	86	46	78	44	84	56	92	74	60	82	122	110	158	136	100	46	32	32	26	20	28	50	30	30	82	38	108	34	48	44	40	60	36	2198
d__Archaea	k__unclassified_d__Archaea	p__Euryarchaeota	c__Methanomicrobia	o__Methanomicrobiales	f__Methanocalculaceae	g__Methanocalculus	s__Methanocalculus_sp._52_23	2	0	6	0	0	0	0	0	0	4	0	0	22	20	22	96	74	36	0	0	0	0	0	0	0	0	4	2	2	2	2	2	2	4	0	0	302
d__Archaea	k__unclassified_d__Archaea	p__Euryarchaeota	c__Methanomicrobia	o__Methanomicrobiales	f__Methanocalculaceae	g__Methanocalculus	s__Methanocalculus_sp._AMF5	4	4	6	74	54	70	122	126	116	168	170	144	30	24	12	10	14	74	32	22	28	44	14	28	152	128	148	146	110	134	32	20	20	40	30	32	2382
d__Archaea	k__unclassified_d__Archaea	p__Euryarchaeota	c__Methanomicrobia	o__Methanomicrobiales	f__Methanocalculaceae	g__Methanocalculus	s__Methanocalculus_sp._MSAO_Arc1	4	24	8	0	2	2	0	0	2	0	0	0	0	10	0	18	6	6	0	6	6	4	4	4	0	0	2	8	10	2	10	4	10	6	16	2	176
d__Archaea	k__unclassified_d__Archaea	p__Euryarchaeota	c__Methanomicrobia	o__Methanomicrobiales	f__Methanocalculaceae	g__Methanocalculus	s__Methanocalculus_sp._MSAO_Arc2	4	12	6	16	12	24	24	8	12	30	36	12	10	16	20	10	18	10	24	30	30	20	2	4	62	44	56	72	26	56	28	20	36	30	12	28	860
d__Archaea	k__unclassified_d__Archaea	p__Euryarchaeota	c__Methanomicrobia	o__Methanomicrobiales	f__Methanocalculaceae	g__Methanocalculus	s__Methanocalculus_taiwanensis	26	14	6	22	20	30	26	38	52	72	38	56	58	88	90	60	70	62	12	10	2	36	18	26	46	18	46	32	48	42	14	6	10	26	10	28	1258
d__Archaea	k__unclassified_d__Archaea	p__Euryarchaeota	c__Methanomicrobia	o__Methanomicrobiales	f__Methanocorpusculaceae	g__Methanocorpusculum	s__Methanocorpusculum_bavaricum	16	16	28	0	2	2	0	0	6	4	0	0	6	16	16	2	0	4	2	0	6	0	0	0	0	0	0	0	0	0	14	20	16	16	14	2	208
d__Archaea	k__unclassified_d__Archaea	p__Euryarchaeota	c__Methanomicrobia	o__Methanomicrobiales	f__Methanocorpusculaceae	g__Methanocorpusculum	s__Methanocorpusculum_labreanum	0	2	0	0	2	4	8	12	2	2	20	12	4	4	0	10	0	10	0	0	0	0	0	0	0	0	0	12	2	8	0	0	0	0	0	0	114
d__Archaea	k__unclassified_d__Archaea	p__Euryarchaeota	c__Methanomicrobia	o__Methanomicrobiales	f__Methanocorpusculaceae	g__Methanocorpusculum	s__Methanocorpusculum_parvum	0	0	0	10	6	22	16	22	20	2	10	2	6	10	8	0	0	4	2	0	4	0	4	8	0	0	2	4	0	2	0	0	0	2	0	0	166
d__Archaea	k__unclassified_d__Archaea	p__Euryarchaeota	c__Methanomicrobia	o__Methanomicrobiales	f__Methanocorpusculaceae	g__Methanocorpusculum	s__Methanocorpusculum_petauri	4	0	0	2	2	2	0	14	2	8	4	4	0	0	0	0	16	0	18	4	2	0	8	0	0	0	0	0	14	0	0	2	0	0	0	0	106
d__Archaea	k__unclassified_d__Archaea	p__Euryarchaeota	c__Methanomicrobia	o__Methanomicrobiales	f__Methanocorpusculaceae	g__Methanocorpusculum	s__Methanocorpusculum_sp.	106	118	82	80	104	84	92	126	110	86	98	92	106	88	98	186	232	168	102	52	100	162	60	44	80	92	78	186	114	208	58	66	56	72	42	32	3660
d__Archaea	k__unclassified_d__Archaea	p__Euryarchaeota	c__Methanomicrobia	o__Methanomicrobiales	f__Methanocorpusculaceae	g__Methanocorpusculum	s__Methanocorpusculum_sp._GPch4	22	56	30	58	44	66	58	84	54	116	80	56	26	28	28	54	46	18	12	16	10	14	18	28	10	14	8	52	60	54	32	20	30	46	26	20	1394
d__Archaea	k__unclassified_d__Archaea	p__Euryarchaeota	c__Methanomicrobia	o__Methanomicrobiales	f__Methanocorpusculaceae	g__Methanocorpusculum	s__Methanocorpusculum_sp._MCE	0	4	2	4	0	0	0	6	0	0	4	0	24	20	32	56	46	44	0	0	0	0	0	0	0	0	0	0	0	0	0	0	0	0	2	0	244
d__Archaea	k__unclassified_d__Archaea	p__Euryarchaeota	c__Methanomicrobia	o__Methanomicrobiales	f__Methanocorpusculaceae	g__Methanocorpusculum	s__Methanocorpusculum_vombati	2	0	4	2	6	2	2	2	0	10	4	6	10	10	8	20	22	18	0	0	4	10	0	0	0	0	0	4	0	4	4	0	4	0	2	2	162
d__Archaea	k__unclassified_d__Archaea	p__Euryarchaeota	c__Methanomicrobia	o__Methanomicrobiales	f__Methanocorpusculaceae	g__unclassified_f__Methanocorpusculaceae	s__Methanocorpusculaceae_archaeon	0	2	0	2	4	0	4	2	2	6	4	4	0	0	0	0	0	0	2	0	4	16	10	24	2	2	2	0	0	8	14	12	4	4	0	2	136
d__Archaea	k__unclassified_d__Archaea	p__Euryarchaeota	c__Methanomicrobia	o__Methanomicrobiales	f__Methanomicrobiaceae	g__Methanoculleus	s__Candidatus_Methanoculleus_thermohydrogenotrophicum	42	6	28	30	32	38	60	46	66	34	58	44	36	96	50	70	26	56	20	28	28	16	2	10	24	32	22	50	12	70	58	56	46	84	78	42	1496
d__Archaea	k__unclassified_d__Archaea	p__Euryarchaeota	c__Methanomicrobia	o__Methanomicrobiales	f__Methanomicrobiaceae	g__Methanoculleus	s__Methanoculleus_bourgensis	246	154	174	166	168	194	192	212	260	252	252	176	482	376	222	416	440	360	190	130	206	166	114	78	348	270	256	206	214	338	210	164	178	182	258	220	8470
d__Archaea	k__unclassified_d__Archaea	p__Euryarchaeota	c__Methanomicrobia	o__Methanomicrobiales	f__Methanomicrobiaceae	g__Methanoculleus	s__Methanoculleus_chikugoensis	106	70	80	42	40	30	38	36	70	56	50	44	188	204	98	158	92	116	76	56	92	44	30	30	84	80	68	142	78	152	108	128	104	124	156	124	3194
d__Archaea	k__unclassified_d__Archaea	p__Euryarchaeota	c__Methanomicrobia	o__Methanomicrobiales	f__Methanomicrobiaceae	g__Methanoculleus	s__Methanoculleus_horonobensis	62	42	42	72	94	90	112	130	84	104	92	96	72	114	54	110	104	88	114	100	150	92	54	24	228	190	192	164	156	238	60	94	78	86	96	70	3748
d__Archaea	k__unclassified_d__Archaea	p__Euryarchaeota	c__Methanomicrobia	o__Methanomicrobiales	f__Methanomicrobiaceae	g__Methanoculleus	s__Methanoculleus_marisnigri	26	30	6	80	38	92	84	102	66	114	98	102	56	68	40	84	80	104	52	36	106	12	10	22	46	36	44	74	74	108	48	70	38	62	56	42	2206
d__Archaea	k__unclassified_d__Archaea	p__Euryarchaeota	c__Methanomicrobia	o__Methanomicrobiales	f__Methanomicrobiaceae	g__Methanoculleus	s__Methanoculleus_sediminis	42	28	32	114	92	82	102	94	106	136	142	90	138	130	52	112	90	88	52	46	38	22	78	44	60	38	60	12	36	38	104	66	92	86	62	92	2696
d__Archaea	k__unclassified_d__Archaea	p__Euryarchaeota	c__Methanomicrobia	o__Methanomicrobiales	f__Methanomicrobiaceae	g__Methanoculleus	s__Methanoculleus_sp.	2920	1858	2242	1482	1232	1662	1666	1598	1952	1416	1766	1426	15164	14616	11602	56780	45812	38270	732	800	922	610	556	360	2236	1974	2092	2354	1736	3056	2122	2130	2004	2578	2736	2602	235064
d__Archaea	k__unclassified_d__Archaea	p__Euryarchaeota	c__Methanomicrobia	o__Methanomicrobiales	f__Methanomicrobiaceae	g__Methanoculleus	s__Methanoculleus_sp._10	34	30	24	186	120	218	214	188	218	220	216	146	190	190	84	90	28	118	40	26	34	16	28	12	90	42	58	112	44	96	90	82	70	76	70	98	3598
d__Archaea	k__unclassified_d__Archaea	p__Euryarchaeota	c__Methanomicrobia	o__Methanomicrobiales	f__Methanomicrobiaceae	g__Methanoculleus	s__Methanoculleus_sp._7T	174	100	140	106	96	152	156	140	198	190	160	166	238	198	168	158	108	172	30	32	68	42	44	36	140	126	102	120	92	106	136	136	176	172	198	168	4744
d__Archaea	k__unclassified_d__Archaea	p__Euryarchaeota	c__Methanomicrobia	o__Methanomicrobiales	f__Methanomicrobiaceae	g__Methanoculleus	s__Methanoculleus_sp._Afa-1	12	42	10	16	18	28	22	28	64	54	34	46	38	58	44	58	32	38	32	30	42	42	34	24	106	60	74	56	44	122	20	26	22	36	26	36	1474
d__Archaea	k__unclassified_d__Archaea	p__Euryarchaeota	c__Methanomicrobia	o__Methanomicrobiales	f__Methanomicrobiaceae	g__Methanoculleus	s__Methanoculleus_sp._CAG:1088	0	0	0	0	0	0	0	2	0	0	0	0	8	0	4	0	0	0	0	0	0	0	0	0	0	6	0	2	0	0	2	0	0	2	0	0	26
d__Archaea	k__unclassified_d__Archaea	p__Euryarchaeota	c__Methanomicrobia	o__Methanomicrobiales	f__Methanomicrobiaceae	g__Methanoculleus	s__Methanoculleus_sp._CWC-02	50	26	40	50	48	80	94	80	102	92	104	92	150	134	72	164	144	154	112	128	138	164	54	36	218	248	208	124	110	152	106	106	86	126	116	114	4022
d__Archaea	k__unclassified_d__Archaea	p__Euryarchaeota	c__Methanomicrobia	o__Methanomicrobiales	f__Methanomicrobiaceae	g__Methanoculleus	s__Methanoculleus_sp._DTU007	18	8	14	16	16	26	30	26	8	28	50	26	40	34	26	28	6	12	20	16	16	46	18	8	24	30	40	14	16	16	22	24	14	20	22	4	782
d__Archaea	k__unclassified_d__Archaea	p__Euryarchaeota	c__Methanomicrobia	o__Methanomicrobiales	f__Methanomicrobiaceae	g__Methanoculleus	s__Methanoculleus_sp._FWC-SCC1	502	414	388	610	532	702	642	650	816	576	720	664	1052	978	698	800	672	738	456	428	480	320	216	154	696	626	550	560	502	664	564	600	510	578	596	640	21294
d__Archaea	k__unclassified_d__Archaea	p__Euryarchaeota	c__Methanomicrobia	o__Methanomicrobiales	f__Methanomicrobiaceae	g__Methanoculleus	s__Methanoculleus_sp._FWC-SCC3	4	4	10	44	54	78	58	44	46	86	66	42	42	28	14	34	14	42	0	2	4	18	8	2	60	38	40	24	22	58	8	8	14	18	16	14	1064
d__Archaea	k__unclassified_d__Archaea	p__Euryarchaeota	c__Methanomicrobia	o__Methanomicrobiales	f__Methanomicrobiaceae	g__Methanoculleus	s__Methanoculleus_sp._MH98A	76	40	66	28	40	54	36	36	38	32	32	38	74	46	26	72	14	70	6	8	8	6	2	6	20	20	30	14	16	24	42	8	18	10	8	26	1090
d__Archaea	k__unclassified_d__Archaea	p__Euryarchaeota	c__Methanomicrobia	o__Methanomicrobiales	f__Methanomicrobiaceae	g__Methanoculleus	s__Methanoculleus_sp._SDB	118	84	96	272	262	288	372	348	428	140	288	190	502	914	504	760	938	988	200	180	272	82	150	108	266	168	182	376	274	466	374	426	344	430	416	528	12734
d__Archaea	k__unclassified_d__Archaea	p__Euryarchaeota	c__Methanomicrobia	o__Methanomicrobiales	f__Methanomicrobiaceae	g__Methanoculleus	s__Methanoculleus_sp._UBA208	4	2	4	6	12	8	10	10	4	34	12	22	16	22	4	10	18	24	4	0	2	0	2	2	4	6	16	4	4	14	2	0	0	2	0	0	284
d__Archaea	k__unclassified_d__Archaea	p__Euryarchaeota	c__Methanomicrobia	o__Methanomicrobiales	f__Methanomicrobiaceae	g__Methanoculleus	s__Methanoculleus_sp._UBA303	46	28	12	62	66	78	94	68	122	68	84	92	70	82	66	40	52	58	16	26	30	10	52	18	32	6	18	166	92	166	48	56	42	50	52	44	2112
d__Archaea	k__unclassified_d__Archaea	p__Euryarchaeota	c__Methanomicrobia	o__Methanomicrobiales	f__Methanomicrobiaceae	g__Methanoculleus	s__Methanoculleus_sp._UBA377	26	14	14	50	52	88	86	90	88	154	146	138	48	68	28	48	52	62	24	38	38	22	20	16	54	32	44	34	42	74	20	42	36	32	18	30	1868
d__Archaea	k__unclassified_d__Archaea	p__Euryarchaeota	c__Methanomicrobia	o__Methanomicrobiales	f__Methanomicrobiaceae	g__Methanoculleus	s__Methanoculleus_sp._UBA413	0	0	0	4	16	16	6	16	10	12	24	8	8	8	2	4	0	2	4	0	10	6	52	16	4	2	4	4	0	4	4	8	6	4	8	8	280
d__Archaea	k__unclassified_d__Archaea	p__Euryarchaeota	c__Methanomicrobia	o__Methanomicrobiales	f__Methanomicrobiaceae	g__Methanoculleus	s__Methanoculleus_sp._UBA430	10	6	2	12	12	2	12	12	18	10	14	0	10	20	6	22	26	10	4	2	8	0	18	2	22	22	24	44	30	70	14	2	8	16	14	8	512
d__Archaea	k__unclassified_d__Archaea	p__Euryarchaeota	c__Methanomicrobia	o__Methanomicrobiales	f__Methanomicrobiaceae	g__Methanoculleus	s__Methanoculleus_taiwanensis	320	268	266	676	556	772	734	740	916	628	760	586	1174	1110	654	1086	728	1190	684	670	738	400	346	216	1144	998	1006	846	668	1180	708	692	630	852	918	856	26716
d__Archaea	k__unclassified_d__Archaea	p__Euryarchaeota	c__Methanomicrobia	o__Methanomicrobiales	f__Methanomicrobiaceae	g__Methanoculleus	s__Methanoculleus_thermophilus	114	104	62	18	44	44	60	64	62	52	72	50	120	124	84	74	62	52	120	112	174	126	56	26	584	542	528	428	316	504	126	124	138	120	102	116	5504
d__Archaea	k__unclassified_d__Archaea	p__Euryarchaeota	c__Methanomicrobia	o__Methanomicrobiales	f__Methanomicrobiaceae	g__Methanofollis	s__Methanofollis_aquaemaris	76	58	44	98	68	130	148	112	154	96	184	94	292	290	152	174	112	130	100	70	126	90	84	52	216	246	226	236	166	286	138	158	114	150	122	130	5122
d__Archaea	k__unclassified_d__Archaea	p__Euryarchaeota	c__Methanomicrobia	o__Methanomicrobiales	f__Methanomicrobiaceae	g__Methanofollis	s__Methanofollis_ethanolicus	112	156	92	302	206	210	248	256	214	366	360	266	406	284	224	228	182	172	116	130	174	108	50	66	568	512	420	394	390	536	338	372	296	416	372	328	9870
d__Archaea	k__unclassified_d__Archaea	p__Euryarchaeota	c__Methanomicrobia	o__Methanomicrobiales	f__Methanomicrobiaceae	g__Methanofollis	s__Methanofollis_fontis	84	82	64	152	142	136	174	170	240	202	262	172	308	300	182	372	328	258	68	82	98	110	32	26	146	184	148	122	130	196	122	118	128	144	144	118	5744
d__Archaea	k__unclassified_d__Archaea	p__Euryarchaeota	c__Methanomicrobia	o__Methanomicrobiales	f__Methanomicrobiaceae	g__Methanofollis	s__Methanofollis_formosanus	224	234	186	228	238	216	226	276	296	298	264	264	422	396	216	340	320	290	610	554	806	944	324	230	790	792	688	492	774	806	378	388	392	372	358	404	15036
d__Archaea	k__unclassified_d__Archaea	p__Euryarchaeota	c__Methanomicrobia	o__Methanomicrobiales	f__Methanomicrobiaceae	g__Methanofollis	s__Methanofollis_liminatans	150	96	122	154	154	240	180	208	288	142	218	150	274	258	204	508	536	406	144	118	130	70	62	32	462	354	354	398	338	496	126	96	120	108	94	116	7906
d__Archaea	k__unclassified_d__Archaea	p__Euryarchaeota	c__Methanomicrobia	o__Methanomicrobiales	f__Methanomicrobiaceae	g__Methanofollis	s__Methanofollis_sp.	176	146	164	490	382	556	544	492	668	538	526	526	962	954	664	994	896	744	408	380	476	376	228	172	962	888	912	918	750	1144	626	632	588	726	780	668	22056
d__Archaea	k__unclassified_d__Archaea	p__Euryarchaeota	c__Methanomicrobia	o__Methanomicrobiales	f__Methanomicrobiaceae	g__Methanofollis	s__Methanofollis_sp._W23	378	420	384	288	244	332	330	354	402	344	366	372	524	506	298	430	420	278	160	142	214	248	134	132	638	640	600	352	386	518	310	294	266	310	294	282	12590
d__Archaea	k__unclassified_d__Archaea	p__Euryarchaeota	c__Methanomicrobia	o__Methanomicrobiales	f__Methanomicrobiaceae	g__Methanofollis	s__Methanofollis_tationis	12	8	2	14	10	34	22	10	24	14	20	34	58	50	48	76	40	38	16	20	30	12	36	0	30	32	42	58	26	116	100	112	104	148	146	130	1672
d__Archaea	k__unclassified_d__Archaea	p__Euryarchaeota	c__Methanomicrobia	o__Methanomicrobiales	f__Methanomicrobiaceae	g__Methanogenium	s__Methanogenium_cariaci	24	20	20	12	16	30	26	34	46	30	38	18	150	146	104	382	340	212	56	30	74	54	10	14	96	58	68	60	90	150	52	62	38	64	46	40	2710
d__Archaea	k__unclassified_d__Archaea	p__Euryarchaeota	c__Methanomicrobia	o__Methanomicrobiales	f__Methanomicrobiaceae	g__Methanogenium	s__Methanogenium_marinum	88	82	90	102	120	180	158	132	248	190	218	132	480	444	328	1140	1076	774	124	96	148	54	54	32	138	118	158	156	154	176	138	100	92	116	166	150	8152
d__Archaea	k__unclassified_d__Archaea	p__Euryarchaeota	c__Methanomicrobia	o__Methanomicrobiales	f__Methanomicrobiaceae	g__Methanogenium	s__Methanogenium_organophilum	164	114	104	220	222	250	260	284	296	256	264	196	818	690	530	2416	1812	1592	114	110	102	140	32	48	156	146	122	122	130	126	126	128	112	118	164	146	12630
d__Archaea	k__unclassified_d__Archaea	p__Euryarchaeota	c__Methanomicrobia	o__Methanomicrobiales	f__Methanomicrobiaceae	g__Methanogenium	s__Methanogenium_sp.	56	52	48	40	54	44	40	64	48	38	22	42	164	266	142	460	372	446	20	12	6	14	2	4	8	28	18	30	14	24	38	58	30	70	60	68	2902
d__Archaea	k__unclassified_d__Archaea	p__Euryarchaeota	c__Methanomicrobia	o__Methanomicrobiales	f__Methanomicrobiaceae	g__Methanogenium	s__Methanogenium_sp._MK-MG	90	80	72	142	132	210	174	138	278	168	194	204	470	438	380	1180	992	764	92	78	164	62	58	68	256	192	232	168	194	252	116	110	108	142	124	140	8662
d__Archaea	k__unclassified_d__Archaea	p__Euryarchaeota	c__Methanomicrobia	o__Methanomicrobiales	f__Methanomicrobiaceae	g__Methanogenium	s__Methanogenium_sp._S4BF	164	58	84	76	98	110	66	104	112	78	128	116	718	786	550	2760	2018	1740	38	30	36	46	28	30	56	68	80	88	60	120	56	50	74	72	44	46	10788
d__Archaea	k__unclassified_d__Archaea	p__Euryarchaeota	c__Methanomicrobia	o__Methanomicrobiales	f__Methanomicrobiaceae	g__Methanolacinia	s__Methanolacinia_paynteri	36	46	56	74	44	26	48	40	64	30	78	22	206	104	100	226	214	150	66	50	50	22	32	22	44	24	40	100	86	78	122	90	82	102	108	116	2798
d__Archaea	k__unclassified_d__Archaea	p__Euryarchaeota	c__Methanomicrobia	o__Methanomicrobiales	f__Methanomicrobiaceae	g__Methanolacinia	s__Methanolacinia_petrolearia	38	18	26	26	8	24	16	34	32	30	30	20	32	24	12	68	70	54	46	26	26	8	18	12	78	34	34	248	96	224	24	20	26	42	20	14	1558
d__Archaea	k__unclassified_d__Archaea	p__Euryarchaeota	c__Methanomicrobia	o__Methanomicrobiales	f__Methanomicrobiaceae	g__Methanomicrobium	s__Methanobacterium_sp._enrichment_culture_clone_T01	0	0	0	0	0	0	0	0	0	0	0	0	0	0	0	0	0	0	0	0	0	0	0	0	0	0	0	0	0	0	0	2	0	0	0	2	4
d__Archaea	k__unclassified_d__Archaea	p__Euryarchaeota	c__Methanomicrobia	o__Methanomicrobiales	f__Methanomicrobiaceae	g__Methanomicrobium	s__Methanomicrobium_antiquum	0	12	2	2	4	2	0	0	0	0	0	0	10	22	12	24	44	8	4	12	2	8	4	0	12	6	14	40	20	50	8	0	4	8	6	0	340
d__Archaea	k__unclassified_d__Archaea	p__Euryarchaeota	c__Methanomicrobia	o__Methanomicrobiales	f__Methanomicrobiaceae	g__Methanomicrobium	s__Methanomicrobium_mobile	0	8	2	0	0	0	0	0	0	0	0	0	4	0	2	0	0	0	0	0	4	0	0	0	8	2	4	2	8	16	12	2	2	6	4	6	92
d__Archaea	k__unclassified_d__Archaea	p__Euryarchaeota	c__Methanomicrobia	o__Methanomicrobiales	f__Methanomicrobiaceae	g__Methanomicrobium	s__Methanomicrobium_sp.	62	74	52	92	66	108	138	130	156	86	122	82	112	206	86	166	222	212	94	94	68	60	56	22	82	68	64	134	100	164	38	66	38	64	58	62	3504
d__Archaea	k__unclassified_d__Archaea	p__Euryarchaeota	c__Methanomicrobia	o__Methanomicrobiales	f__Methanomicrobiaceae	g__Methanomicrobium	s__Methanomicrobium_sp._W14	2	4	6	24	24	16	28	28	44	36	24	36	28	18	10	42	12	24	26	14	28	6	14	32	32	20	22	36	24	50	24	12	10	12	18	6	792
d__Archaea	k__unclassified_d__Archaea	p__Euryarchaeota	c__Methanomicrobia	o__Methanomicrobiales	f__Methanomicrobiaceae	g__Methanoplanus	s__Methanoplanus_endosymbiosus	22	26	20	88	82	146	176	180	178	280	298	216	104	58	28	184	236	190	4	10	2	10	8	4	90	76	84	120	78	136	14	20	8	20	16	12	3224
d__Archaea	k__unclassified_d__Archaea	p__Euryarchaeota	c__Methanomicrobia	o__Methanomicrobiales	f__Methanomicrobiaceae	g__Methanoplanus	s__Methanoplanus_limicola	20	18	8	22	38	28	38	22	52	32	22	24	62	58	60	60	78	42	10	12	16	2	10	4	28	10	22	30	26	44	16	14	8	6	6	18	966
d__Archaea	k__unclassified_d__Archaea	p__Euryarchaeota	c__Methanomicrobia	o__Methanomicrobiales	f__Methanomicrobiaceae	g__unclassified_f__Methanomicrobiaceae	s__Methanomicrobiaceae_archaeon	462	416	424	778	628	996	1058	1080	1374	750	926	834	1412	2262	1218	2246	1994	2418	432	420	520	446	310	260	850	896	818	1084	788	1418	1816	1484	1724	2270	2442	2150	41404
d__Archaea	k__unclassified_d__Archaea	p__Euryarchaeota	c__Methanomicrobia	o__Methanomicrobiales	f__Methanomicrobiaceae	g__unclassified_f__Methanomicrobiaceae	s__Methanomicrobiaceae_archaeon_CYW5	3864	2488	3178	706	650	868	688	656	1126	626	950	748	32256	28950	27442	116312	97286	76560	114	230	98	82	86	48	248	208	142	256	180	542	554	396	474	714	596	518	400840
d__Archaea	k__unclassified_d__Archaea	p__Euryarchaeota	c__Methanomicrobia	o__Methanomicrobiales	f__Methanoregulaceae	g__Methanolinea	s__Methanolinea_mesophila	122	100	114	194	150	186	184	174	216	140	154	128	204	198	122	300	224	206	98	118	112	110	76	54	292	306	288	278	190	280	136	116	170	150	166	214	6270
d__Archaea	k__unclassified_d__Archaea	p__Euryarchaeota	c__Methanomicrobia	o__Methanomicrobiales	f__Methanoregulaceae	g__Methanolinea	s__Methanolinea_sp.	416	252	456	298	376	386	412	382	480	346	408	322	420	372	302	354	332	338	150	162	214	156	136	74	556	500	496	456	368	608	192	206	194	206	214	220	11760
d__Archaea	k__unclassified_d__Archaea	p__Euryarchaeota	c__Methanomicrobia	o__Methanomicrobiales	f__Methanoregulaceae	g__Methanolinea	s__Methanolinea_sp._SDB	110	108	78	46	62	72	74	56	82	66	78	74	120	136	122	118	124	90	50	58	30	18	36	18	126	128	52	122	120	146	164	102	112	154	100	134	3286
d__Archaea	k__unclassified_d__Archaea	p__Euryarchaeota	c__Methanomicrobia	o__Methanomicrobiales	f__Methanoregulaceae	g__Methanoregula	s__Methanoregula_boonei	96	80	38	58	62	52	78	64	64	70	74	70	40	28	30	32	80	62	6	20	14	6	16	8	16	18	14	54	8	48	50	30	58	40	30	30	1544
d__Archaea	k__unclassified_d__Archaea	p__Euryarchaeota	c__Methanomicrobia	o__Methanomicrobiales	f__Methanoregulaceae	g__Methanoregula	s__Methanoregula_formicica	10	4	6	14	2	4	22	20	32	28	28	20	12	24	12	4	20	6	14	14	10	8	8	10	26	58	42	44	14	20	24	22	10	4	26	20	642
d__Archaea	k__unclassified_d__Archaea	p__Euryarchaeota	c__Methanomicrobia	o__Methanomicrobiales	f__Methanoregulaceae	g__Methanoregula	s__Methanoregula_sp.	3250	2400	2738	2144	2032	2542	3010	3098	3394	2868	3376	2866	3194	2816	2188	2926	3090	2528	2284	2008	2210	1022	1222	800	3290	2824	2686	3978	2760	4554	2238	2220	2190	2462	2400	2408	94016
d__Archaea	k__unclassified_d__Archaea	p__Euryarchaeota	c__Methanomicrobia	o__Methanomicrobiales	f__Methanoregulaceae	g__Methanoregula	s__Methanoregula_sp._PtaB.Bin085	14	2	6	4	2	4	10	10	2	14	4	8	0	0	4	0	0	4	2	8	2	4	8	4	2	2	4	12	6	6	2	0	0	0	2	2	154
d__Archaea	k__unclassified_d__Archaea	p__Euryarchaeota	c__Methanomicrobia	o__Methanomicrobiales	f__Methanoregulaceae	g__Methanoregula	s__Methanoregula_sp._PtaU1.Bin006	18	2	2	2	4	0	2	2	8	4	0	2	16	12	2	20	2	8	2	2	14	0	6	2	14	0	6	126	68	82	0	0	0	2	2	0	432
d__Archaea	k__unclassified_d__Archaea	p__Euryarchaeota	c__Methanomicrobia	o__Methanomicrobiales	f__Methanoregulaceae	g__Methanoregula	s__Methanoregula_sp._PtaU1.Bin051	20	36	18	36	14	24	42	32	34	34	54	34	36	24	38	30	58	42	28	26	24	4	2	6	8	12	26	20	26	30	14	6	4	10	10	14	876
d__Archaea	k__unclassified_d__Archaea	p__Euryarchaeota	c__Methanomicrobia	o__Methanomicrobiales	f__Methanoregulaceae	g__Methanoregula	s__Methanoregula_sp._UBA64	10	6	6	14	0	10	2	12	2	10	22	12	38	52	44	64	48	64	28	20	28	14	14	2	24	52	34	44	24	22	46	38	30	38	42	38	954
d__Archaea	k__unclassified_d__Archaea	p__Euryarchaeota	c__Methanomicrobia	o__Methanomicrobiales	f__Methanoregulaceae	g__Methanosphaerula	s__Methanosphaerula_palustris	100	86	140	110	74	100	120	120	134	88	136	88	114	94	26	78	70	86	20	32	28	6	58	40	108	82	66	146	78	182	42	36	42	28	40	38	2836
d__Archaea	k__unclassified_d__Archaea	p__Euryarchaeota	c__Methanomicrobia	o__Methanomicrobiales	f__Methanoregulaceae	g__unclassified_f__Methanoregulaceae	s__Methanoregulaceae_archaeon	7712	4942	6304	4720	4420	5786	6110	6332	6980	6434	7468	6348	6324	6592	4426	4844	4936	5088	3430	2640	3926	1958	1728	1296	4238	3844	3656	4728	3070	5560	3794	3756	3826	4132	4008	4078	169434
d__Archaea	k__unclassified_d__Archaea	p__Euryarchaeota	c__Methanomicrobia	o__Methanomicrobiales	f__Methanoregulaceae	g__unclassified_f__Methanoregulaceae	s__Methanoregulaceae_archaeon_PtaB.Bin009	50	16	36	16	14	28	40	12	36	18	28	14	48	54	44	56	70	46	4	2	8	8	2	2	20	12	24	8	20	52	22	14	26	28	16	18	912
d__Archaea	k__unclassified_d__Archaea	p__Euryarchaeota	c__Methanomicrobia	o__Methanomicrobiales	f__Methanoregulaceae	g__unclassified_f__Methanoregulaceae	s__Methanoregulaceae_archaeon_PtaB.Bin056	126	52	62	30	34	24	42	38	40	52	50	54	30	44	28	54	116	50	16	20	22	14	26	6	12	14	10	58	10	48	48	34	42	72	54	52	1484
d__Archaea	k__unclassified_d__Archaea	p__Euryarchaeota	c__Methanomicrobia	o__Methanomicrobiales	f__Methanoregulaceae	g__unclassified_f__Methanoregulaceae	s__Methanoregulaceae_archaeon_PtaB.Bin108	22	22	60	8	14	22	26	16	30	20	16	22	76	38	58	148	126	102	36	18	22	10	28	14	10	10	28	52	26	50	34	36	30	32	52	36	1350
d__Archaea	k__unclassified_d__Archaea	p__Euryarchaeota	c__Methanomicrobia	o__Methanomicrobiales	f__Methanoregulaceae	g__unclassified_f__Methanoregulaceae	s__Methanoregulaceae_archaeon_PtaB.Bin152	90	52	44	20	28	26	30	14	20	20	48	46	54	48	66	54	18	42	14	22	16	18	20	16	56	76	58	26	24	42	24	32	42	60	42	44	1352
d__Archaea	k__unclassified_d__Archaea	p__Euryarchaeota	c__Methanomicrobia	o__Methanomicrobiales	f__Methanoregulaceae	g__unclassified_f__Methanoregulaceae	s__Methanoregulaceae_archaeon_PtaU1.Bin059	4	2	8	0	0	0	0	0	6	0	0	4	24	12	16	34	38	22	0	0	0	0	0	0	8	2	0	8	2	6	2	0	0	0	0	8	206
d__Archaea	k__unclassified_d__Archaea	p__Euryarchaeota	c__Methanomicrobia	o__Methanomicrobiales	f__Methanoregulaceae	g__unclassified_f__Methanoregulaceae	s__Methanoregulaceae_archaeon_PtaU1.Bin066	32	22	14	12	4	8	8	26	8	2	12	6	8	14	14	8	10	8	0	0	4	0	0	0	0	0	0	0	0	4	2	2	2	0	0	0	230
d__Archaea	k__unclassified_d__Archaea	p__Euryarchaeota	c__Methanomicrobia	o__Methanomicrobiales	f__Methanoregulaceae	g__unclassified_f__Methanoregulaceae	s__Methanoregulaceae_archaeon_PtaU1.Bin222	46	28	40	28	12	22	46	16	42	26	38	28	24	40	34	34	44	50	16	22	20	20	32	18	68	28	54	74	46	76	54	56	38	50	34	50	1354
d__Archaea	k__unclassified_d__Archaea	p__Euryarchaeota	c__Methanomicrobia	o__Methanomicrobiales	f__Methanospirillaceae	g__Methanospirillum	s__Methanospirillum_hungatei	80	40	82	54	46	88	106	90	98	78	54	88	124	96	82	52	260	52	46	38	34	50	66	40	52	64	70	60	36	60	58	40	40	28	72	38	2462
d__Archaea	k__unclassified_d__Archaea	p__Euryarchaeota	c__Methanomicrobia	o__Methanomicrobiales	f__Methanospirillaceae	g__Methanospirillum	s__Methanospirillum_lacunae	12	2	10	16	22	44	34	48	48	40	38	54	20	20	28	16	38	26	20	20	18	0	24	4	24	20	12	28	26	40	4	4	4	8	16	14	802
d__Archaea	k__unclassified_d__Archaea	p__Euryarchaeota	c__Methanomicrobia	o__Methanomicrobiales	f__Methanospirillaceae	g__Methanospirillum	s__Methanospirillum_sp.	190	130	138	182	144	218	254	204	244	240	302	262	234	240	224	248	298	256	214	178	182	184	166	80	296	274	240	300	280	340	186	160	168	184	190	176	7806
d__Archaea	k__unclassified_d__Archaea	p__Euryarchaeota	c__Methanomicrobia	o__Methanomicrobiales	f__Methanospirillaceae	g__Methanospirillum	s__Methanospirillum_sp._J.3.6.1-F.2.7.3	10	14	34	104	88	118	108	120	96	80	68	74	78	100	70	30	34	22	6	0	10	8	16	38	64	74	96	34	20	54	8	20	6	2	8	12	1724
d__Archaea	k__unclassified_d__Archaea	p__Euryarchaeota	c__Methanomicrobia	o__Methanomicrobiales	f__Methanospirillaceae	g__Methanospirillum	s__Methanospirillum_stamsii	10	12	18	32	32	52	54	34	50	50	50	32	30	40	38	32	122	28	24	44	24	16	14	14	24	8	22	50	30	36	36	22	32	42	48	44	1246
d__Archaea	k__unclassified_d__Archaea	p__Euryarchaeota	c__Methanomicrobia	o__Methanomicrobiales	f__Methanospirillaceae	g__unclassified_f__Methanospirillaceae	s__Methanospirillaceae_archaeon	62	54	64	70	46	106	86	106	92	78	128	108	140	120	84	90	96	84	56	60	36	32	28	18	42	34	52	76	32	52	44	62	48	58	66	70	2480
d__Archaea	k__unclassified_d__Archaea	p__Euryarchaeota	c__Methanomicrobia	o__Methanomicrobiales	f__unclassified_o__Methanomicrobiales	g__unclassified_o__Methanomicrobiales	s__Methanomicrobiales_archaeon	11664	7324	9568	4594	3926	5220	5700	5430	6414	5310	6528	5090	6860	7068	4910	7154	7044	6268	3280	2700	3384	2302	2104	1400	6514	5942	5916	7170	5376	9158	3542	3454	3304	3848	3848	3870	193184
d__Archaea	k__unclassified_d__Archaea	p__Euryarchaeota	c__Methanomicrobia	o__Methanomicrobiales	f__unclassified_o__Methanomicrobiales	g__unclassified_o__Methanomicrobiales	s__Methanomicrobiales_archaeon_53_19	2	10	2	16	12	18	18	28	16	6	22	6	12	16	8	24	24	22	0	2	4	6	0	6	4	4	6	60	12	24	32	20	16	32	18	12	520
d__Archaea	k__unclassified_d__Archaea	p__Euryarchaeota	c__Methanomicrobia	o__Methanomicrobiales	f__unclassified_o__Methanomicrobiales	g__unclassified_o__Methanomicrobiales	s__Methanomicrobiales_archaeon_HGW-Methanomicrobiales-1	20	18	22	20	14	10	12	36	10	34	36	24	12	12	10	30	24	24	2	4	2	2	12	8	22	34	36	36	10	34	2	6	6	2	10	4	600
d__Archaea	k__unclassified_d__Archaea	p__Euryarchaeota	c__Methanomicrobia	o__Methanomicrobiales	f__unclassified_o__Methanomicrobiales	g__unclassified_o__Methanomicrobiales	s__Methanomicrobiales_archaeon_HGW-Methanomicrobiales-2	34	48	40	68	28	82	96	56	74	52	76	50	186	184	128	96	102	84	40	64	82	36	56	24	210	218	182	154	102	226	172	180	166	168	176	156	3896
d__Archaea	k__unclassified_d__Archaea	p__Euryarchaeota	c__Methanomicrobia	o__Methanomicrobiales	f__unclassified_o__Methanomicrobiales	g__unclassified_o__Methanomicrobiales	s__Methanomicrobiales_archaeon_HGW-Methanomicrobiales-3	86	46	72	70	68	44	98	104	106	52	56	50	92	56	24	36	32	58	8	14	20	0	12	16	28	36	28	26	18	40	8	18	24	22	20	12	1500
d__Archaea	k__unclassified_d__Archaea	p__Euryarchaeota	c__Methanomicrobia	o__Methanomicrobiales	f__unclassified_o__Methanomicrobiales	g__unclassified_o__Methanomicrobiales	s__Methanomicrobiales_archaeon_HGW-Methanomicrobiales-4	36	40	50	42	8	48	52	36	50	42	78	34	136	118	56	204	208	156	76	74	84	22	26	48	50	42	62	54	38	70	48	34	34	40	42	56	2294
d__Archaea	k__unclassified_d__Archaea	p__Euryarchaeota	c__Methanomicrobia	o__Methanomicrobiales	f__unclassified_o__Methanomicrobiales	g__unclassified_o__Methanomicrobiales	s__Methanomicrobiales_archaeon_HGW-Methanomicrobiales-5	336	304	306	138	190	224	208	194	308	194	282	228	550	574	318	618	780	498	184	192	178	102	104	78	218	144	186	148	108	234	408	410	452	470	430	446	10742
d__Archaea	k__unclassified_d__Archaea	p__Euryarchaeota	c__Methanomicrobia	o__Methanomicrobiales	f__unclassified_o__Methanomicrobiales	g__unclassified_o__Methanomicrobiales	s__Methanomicrobiales_archaeon_HGW-Methanomicrobiales-6	30	32	26	28	42	54	42	38	20	22	16	26	30	34	28	96	42	52	26	28	42	14	12	6	16	14	12	22	16	12	20	22	30	22	22	16	1010
d__Archaea	k__unclassified_d__Archaea	p__Euryarchaeota	c__Methanomicrobia	o__Methanomicrobiales	f__unclassified_o__Methanomicrobiales	g__unclassified_o__Methanomicrobiales	s__methanogenic_archaeon_mixed_culture_ISO4-G1	0	0	0	0	6	6	2	2	0	24	36	26	2	0	0	6	0	24	0	0	0	0	0	0	0	0	0	0	0	0	0	0	0	0	0	0	134
d__Archaea	k__unclassified_d__Archaea	p__Euryarchaeota	c__Methanomicrobia	o__Methanophagales	f__Candidatus_Methanospirareceae	g__Candidatus_Methanospirare	s__Candidatus_Methanospirare_jalkutatii	72	78	82	96	116	78	140	114	126	112	110	94	56	62	76	52	48	78	66	76	96	22	20	24	118	134	116	104	100	172	56	52	60	68	66	76	3016
d__Archaea	k__unclassified_d__Archaea	p__Euryarchaeota	c__Methanomicrobia	o__Methanophagales	f__Candidatus_Methanospirareceae	g__Candidatus_Methanoxibalbensis	s__Candidatus_Methanoxibalbensis_ujae	152	126	102	114	144	182	236	204	250	180	268	206	178	170	86	116	136	130	148	180	154	160	62	44	374	428	336	364	254	418	212	228	238	290	306	274	7450
d__Archaea	k__unclassified_d__Archaea	p__Euryarchaeota	c__Methanomicrobia	o__Methanophagales	f__unclassified_o__Methanophagales	g__unclassified_o__Methanophagales	s__ANME-1_cluster_archaeon_AG-394-G06	90	44	60	40	40	36	40	40	36	36	38	32	116	88	62	84	48	54	20	26	18	18	28	10	24	32	30	28	36	30	28	22	16	18	24	4	1396
d__Archaea	k__unclassified_d__Archaea	p__Euryarchaeota	c__Methanomicrobia	o__Methanophagales	f__unclassified_o__Methanophagales	g__unclassified_o__Methanophagales	s__ANME-1_cluster_archaeon_AG-394-G21	192	108	106	40	32	86	88	106	72	70	64	102	94	74	52	60	46	58	132	104	114	70	46	30	82	68	84	132	82	116	68	70	84	72	76	96	2976
d__Archaea	k__unclassified_d__Archaea	p__Euryarchaeota	c__Methanomicrobia	o__Methanophagales	f__unclassified_o__Methanophagales	g__unclassified_o__Methanophagales	s__ANME-1_cluster_archaeon_GoMg1	186	116	142	102	118	100	136	146	112	146	120	132	42	40	52	40	30	82	78	72	114	38	118	84	98	92	76	92	58	142	46	50	46	48	60	46	3200
d__Archaea	k__unclassified_d__Archaea	p__Euryarchaeota	c__Methanomicrobia	o__Methanophagales	f__unclassified_o__Methanophagales	g__unclassified_o__Methanophagales	s__ANME-1_cluster_archaeon_GoMg2	58	58	52	106	92	108	108	104	166	136	140	124	98	98	56	20	38	42	38	60	74	32	30	22	86	92	60	220	120	184	28	24	24	26	32	32	2788
d__Archaea	k__unclassified_d__Archaea	p__Euryarchaeota	c__Methanomicrobia	o__Methanophagales	f__unclassified_o__Methanophagales	g__unclassified_o__Methanophagales	s__ANME-1_cluster_archaeon_GoMg3.2	140	82	134	342	222	264	282	236	282	266	270	188	234	220	176	200	178	168	156	124	146	80	102	70	214	176	198	204	166	236	106	96	100	110	88	112	6368
d__Archaea	k__unclassified_d__Archaea	p__Euryarchaeota	c__Methanomicrobia	o__Methanophagales	f__unclassified_o__Methanophagales	g__unclassified_o__Methanophagales	s__ANME-1_cluster_archaeon_GoMg4	14	14	30	20	10	48	42	34	52	16	34	26	30	76	50	56	86	48	76	50	66	14	48	6	18	24	30	72	34	76	22	22	22	26	24	16	1332
d__Archaea	k__unclassified_d__Archaea	p__Euryarchaeota	c__Methanomicrobia	o__Methanophagales	f__unclassified_o__Methanophagales	g__unclassified_o__Methanophagales	s__ANME-1_cluster_archaeon_ex4572_4	26	26	14	8	10	16	24	6	14	6	14	0	8	20	6	6	0	6	6	8	16	4	4	4	0	0	0	0	0	0	14	10	20	8	8	8	320
d__Archaea	k__unclassified_d__Archaea	p__Euryarchaeota	c__Methanomicrobia	o__Methanophagales	f__unclassified_o__Methanophagales	g__unclassified_o__Methanophagales	s__Methanophagales_archaeon	6098	4700	5332	5828	5682	7528	7944	7814	8726	7132	8170	7070	7186	7006	4732	4796	4930	5032	7014	6266	8066	4752	3588	2564	11218	9826	10470	11532	8110	14368	5734	5762	5652	6306	6096	6410	249440
d__Archaea	k__unclassified_d__Archaea	p__Euryarchaeota	c__Methanomicrobia	o__Methanophagales	f__unclassified_o__Methanophagales	g__unclassified_o__Methanophagales	s__Methanophagales_archaeon_ANME-1-THS	314	190	252	140	98	168	170	150	226	180	210	120	176	224	142	120	134	170	42	64	74	42	48	12	74	66	110	356	138	292	182	170	140	160	168	146	5468
d__Archaea	k__unclassified_d__Archaea	p__Euryarchaeota	c__Methanomicrobia	o__Methanosarcinales	f__Candidatus_Methanoperedenaceae	g__Candidatus_Methanoperedens	s__Candidatus_Methanoperedens_nitroreducens	2808	1914	2008	1672	1530	1886	1974	2144	2332	2054	2226	1948	2764	2696	2012	1776	1544	1828	1138	1040	1282	772	674	498	1108	970	1002	988	854	1328	1412	1416	1314	1592	1476	1476	57456
d__Archaea	k__unclassified_d__Archaea	p__Euryarchaeota	c__Methanomicrobia	o__Methanosarcinales	f__Candidatus_Methanoperedenaceae	g__Candidatus_Methanoperedens	s__Candidatus_Methanoperedens_sp.	6796	5344	6204	7270	6570	8684	9118	9284	10106	9550	10578	9336	9214	8246	5786	6650	6008	6918	5122	4426	5580	3258	2926	2270	6840	6058	6364	7160	4972	8848	5066	4962	4796	5224	5398	5128	236060
d__Archaea	k__unclassified_d__Archaea	p__Euryarchaeota	c__Methanomicrobia	o__Methanosarcinales	f__Candidatus_Methanoperedenaceae	g__Candidatus_Methanoperedens	s__Candidatus_Methanoperedens_sp._BLZ1	134	100	154	118	146	114	202	162	210	144	198	154	282	246	158	136	124	132	236	162	238	142	108	98	218	178	228	148	154	196	178	182	208	162	212	186	6148
d__Archaea	k__unclassified_d__Archaea	p__Euryarchaeota	c__Methanomicrobia	o__Methanosarcinales	f__Candidatus_Methanoperedenaceae	g__Candidatus_Methanoperedens	s__Candidatus_Methanoperedens_sp._BLZ2	156	152	146	294	276	312	366	368	442	300	410	300	230	234	152	194	130	244	120	76	110	100	74	48	164	180	142	150	116	184	100	110	108	128	102	104	6822
d__Archaea	k__unclassified_d__Archaea	p__Euryarchaeota	c__Methanomicrobia	o__Methanosarcinales	f__Candidatus_Methanoperedenaceae	g__unclassified_f__Candidatus_Methanoperedenaceae	s__Candidatus_Methanoperedenaceae_archaeon	626	514	590	718	684	860	916	968	1042	928	1118	950	682	772	456	604	538	750	1164	988	1144	514	550	452	918	878	844	896	706	1136	556	558	488	616	544	610	27278
d__Archaea	k__unclassified_d__Archaea	p__Euryarchaeota	c__Methanomicrobia	o__Methanosarcinales	f__Candidatus_Methanoperedenaceae	g__unclassified_f__Candidatus_Methanoperedenaceae	s__Candidatus_Methanoperedenaceae_archaeon_GB37	402	304	344	236	302	442	390	360	482	412	536	378	268	208	274	158	208	240	834	570	676	234	370	174	252	238	242	736	300	688	192	226	204	196	200	300	12576
d__Archaea	k__unclassified_d__Archaea	p__Euryarchaeota	c__Methanomicrobia	o__Methanosarcinales	f__Candidatus_Methanoperedenaceae	g__unclassified_f__Candidatus_Methanoperedenaceae	s__Candidatus_Methanoperedenaceae_archaeon_GB50	584	388	520	378	406	490	600	590	552	792	880	660	212	272	256	194	122	332	902	712	736	338	524	176	456	422	434	832	402	864	282	344	320	298	256	406	16932
d__Archaea	k__unclassified_d__Archaea	p__Euryarchaeota	c__Methanomicrobia	o__Methanosarcinales	f__Candidatus_Methanoperedenaceae	g__unclassified_f__Candidatus_Methanoperedenaceae	s__Candidatus_Methanoperedenaceae_archaeon_HGW-Methanoperedenaceae-1	2	2	0	0	2	0	0	0	0	2	0	0	0	4	2	0	0	0	10	6	2	0	6	2	8	4	2	4	4	10	2	2	0	0	0	0	76
d__Archaea	k__unclassified_d__Archaea	p__Euryarchaeota	c__Methanomicrobia	o__Methanosarcinales	f__Methanosarcinaceae	g__Methanimicrococcus	s__Methanimicrococcus_blatticola	18	6	6	2	0	0	0	0	8	4	0	0	0	0	0	0	0	6	0	4	0	0	0	0	0	0	0	2	2	2	0	0	0	2	4	0	66
d__Archaea	k__unclassified_d__Archaea	p__Euryarchaeota	c__Methanomicrobia	o__Methanosarcinales	f__Methanosarcinaceae	g__Methanimicrococcus	s__Methanimicrococcus_sp.	0	0	0	0	0	0	2	0	2	4	6	0	2	0	0	0	8	0	0	0	0	0	0	0	4	8	4	0	0	12	2	2	2	6	4	2	70
d__Archaea	k__unclassified_d__Archaea	p__Euryarchaeota	c__Methanomicrobia	o__Methanosarcinales	f__Methanosarcinaceae	g__Methanimicrococcus	s__Methanimicrococcus_sp._OttesenSCG-928-J09	0	4	0	0	0	0	0	0	0	0	0	0	0	0	0	22	24	0	2	0	4	8	0	0	6	0	0	0	2	8	0	0	0	4	0	0	84
d__Archaea	k__unclassified_d__Archaea	p__Euryarchaeota	c__Methanomicrobia	o__Methanosarcinales	f__Methanosarcinaceae	g__Methanococcoides	s__Methanococcoides_alaskense	56	54	42	28	42	38	30	38	78	42	38	34	160	100	94	134	284	96	38	32	46	22	16	28	42	8	26	36	0	14	30	36	26	34	30	32	1884
d__Archaea	k__unclassified_d__Archaea	p__Euryarchaeota	c__Methanomicrobia	o__Methanosarcinales	f__Methanosarcinaceae	g__Methanococcoides	s__Methanococcoides_burtonii	46	16	56	64	42	56	54	90	46	76	78	48	112	64	46	162	178	128	22	32	46	30	28	32	142	100	100	96	106	116	40	10	16	30	22	28	2358
d__Archaea	k__unclassified_d__Archaea	p__Euryarchaeota	c__Methanomicrobia	o__Methanosarcinales	f__Methanosarcinaceae	g__Methanococcoides	s__Methanococcoides_methylutens	376	330	234	260	192	290	302	308	380	286	338	312	284	352	234	162	236	222	412	378	900	442	296	228	858	842	820	730	580	938	274	250	224	260	234	250	14014
d__Archaea	k__unclassified_d__Archaea	p__Euryarchaeota	c__Methanomicrobia	o__Methanosarcinales	f__Methanosarcinaceae	g__Methanococcoides	s__Methanococcoides_orientis	424	288	336	542	514	626	668	796	780	600	746	562	400	354	206	320	260	392	250	200	356	248	218	238	222	234	328	346	240	488	172	156	152	130	230	210	13232
d__Archaea	k__unclassified_d__Archaea	p__Euryarchaeota	c__Methanomicrobia	o__Methanosarcinales	f__Methanosarcinaceae	g__Methanococcoides	s__Methanococcoides_seepicolus	58	48	28	208	192	250	224	250	296	156	280	214	88	84	58	94	68	94	60	68	94	56	30	20	56	32	46	42	34	52	34	36	60	54	80	60	3604
d__Archaea	k__unclassified_d__Archaea	p__Euryarchaeota	c__Methanomicrobia	o__Methanosarcinales	f__Methanosarcinaceae	g__Methanococcoides	s__Methanococcoides_sp.	410	344	494	450	538	714	790	884	886	566	714	562	866	612	494	736	984	692	1092	916	978	458	676	524	1852	1742	1806	2092	1554	2590	580	572	520	590	506	648	31432
d__Archaea	k__unclassified_d__Archaea	p__Euryarchaeota	c__Methanomicrobia	o__Methanosarcinales	f__Methanosarcinaceae	g__Methanococcoides	s__Methanococcoides_sp._AM1	156	114	114	68	50	126	72	84	152	118	80	96	182	168	114	302	332	182	82	76	92	100	82	104	62	80	62	86	146	140	100	98	112	106	84	106	4228
d__Archaea	k__unclassified_d__Archaea	p__Euryarchaeota	c__Methanomicrobia	o__Methanosarcinales	f__Methanosarcinaceae	g__Methanococcoides	s__Methanococcoides_sp._NM1	70	58	18	30	44	64	36	44	26	38	34	42	96	40	54	44	152	68	32	60	86	24	26	20	108	106	62	198	84	176	48	32	30	44	48	48	2190
d__Archaea	k__unclassified_d__Archaea	p__Euryarchaeota	c__Methanomicrobia	o__Methanosarcinales	f__Methanosarcinaceae	g__Methanococcoides	s__Methanococcoides_sp._SA1	138	174	170	218	198	264	318	254	310	222	282	240	166	192	104	164	268	202	318	406	416	238	126	146	460	470	446	560	274	606	190	206	194	218	176	216	9550
d__Archaea	k__unclassified_d__Archaea	p__Euryarchaeota	c__Methanomicrobia	o__Methanosarcinales	f__Methanosarcinaceae	g__Methanococcoides	s__Methanococcoides_vulcani	66	64	88	30	56	46	84	78	66	136	138	78	168	132	108	150	258	130	106	76	146	128	46	36	158	100	132	90	94	124	68	72	84	92	104	122	3654
d__Archaea	k__unclassified_d__Archaea	p__Euryarchaeota	c__Methanomicrobia	o__Methanosarcinales	f__Methanosarcinaceae	g__Methanohalobium	s__Methanohalobium_evestigatum	28	26	40	42	54	32	34	36	30	38	28	18	44	50	34	74	124	58	14	8	20	28	6	12	58	46	18	52	42	72	26	42	44	32	36	48	1394
d__Archaea	k__unclassified_d__Archaea	p__Euryarchaeota	c__Methanomicrobia	o__Methanosarcinales	f__Methanosarcinaceae	g__Methanohalobium	s__Methanohalobium_sp.	34	120	34	12	16	22	18	16	14	40	16	14	36	20	20	60	132	48	28	14	26	10	18	12	20	20	20	178	52	42	10	2	20	12	24	20	1200
d__Archaea	k__unclassified_d__Archaea	p__Euryarchaeota	c__Methanomicrobia	o__Methanosarcinales	f__Methanosarcinaceae	g__Methanohalophilus	s__Methanohalophilus_euhalobius	2	2	0	4	0	2	2	0	0	4	6	0	12	18	56	10	14	8	0	0	0	0	2	0	2	10	14	14	4	14	0	0	0	0	0	0	200
d__Archaea	k__unclassified_d__Archaea	p__Euryarchaeota	c__Methanomicrobia	o__Methanosarcinales	f__Methanosarcinaceae	g__Methanohalophilus	s__Methanohalophilus_halophilus	16	14	28	34	30	38	18	38	62	32	66	48	134	74	28	70	72	90	46	34	58	62	30	18	100	84	80	160	84	128	40	34	52	58	52	46	2058
d__Archaea	k__unclassified_d__Archaea	p__Euryarchaeota	c__Methanomicrobia	o__Methanosarcinales	f__Methanosarcinaceae	g__Methanohalophilus	s__Methanohalophilus_levihalophilus	160	150	144	278	306	378	442	402	448	384	426	356	452	300	222	250	220	276	158	192	198	218	78	96	250	194	178	450	164	342	232	256	224	318	370	336	9848
d__Archaea	k__unclassified_d__Archaea	p__Euryarchaeota	c__Methanomicrobia	o__Methanosarcinales	f__Methanosarcinaceae	g__Methanohalophilus	s__Methanohalophilus_mahii	40	36	36	58	50	66	68	82	94	64	114	62	74	60	30	54	128	38	28	74	36	22	76	36	24	44	16	56	20	60	30	18	18	18	26	34	1790
d__Archaea	k__unclassified_d__Archaea	p__Euryarchaeota	c__Methanomicrobia	o__Methanosarcinales	f__Methanosarcinaceae	g__Methanohalophilus	s__Methanohalophilus_portucalensis	40	22	26	40	44	50	36	40	74	26	46	50	140	160	92	180	240	138	22	28	52	48	10	30	58	50	50	52	36	74	68	64	78	108	82	88	2442
d__Archaea	k__unclassified_d__Archaea	p__Euryarchaeota	c__Methanomicrobia	o__Methanosarcinales	f__Methanosarcinaceae	g__Methanohalophilus	s__Methanohalophilus_profundi	10	2	6	12	10	10	6	20	6	8	18	12	26	20	30	10	12	22	14	0	4	2	8	2	32	18	24	30	20	30	30	30	10	16	28	22	560
d__Archaea	k__unclassified_d__Archaea	p__Euryarchaeota	c__Methanomicrobia	o__Methanosarcinales	f__Methanosarcinaceae	g__Methanohalophilus	s__Methanohalophilus_sp.	52	34	46	34	24	24	42	68	78	48	70	56	96	60	48	152	222	122	32	36	42	24	20	16	142	166	158	162	106	238	86	64	66	56	58	48	2796
d__Archaea	k__unclassified_d__Archaea	p__Euryarchaeota	c__Methanomicrobia	o__Methanosarcinales	f__Methanosarcinaceae	g__Methanohalophilus	s__Methanohalophilus_sp._2-GBenrich	0	2	0	0	0	0	6	0	0	2	0	0	18	16	8	22	28	26	0	0	0	0	0	0	0	0	0	0	0	0	0	0	0	0	0	0	128
d__Archaea	k__unclassified_d__Archaea	p__Euryarchaeota	c__Methanomicrobia	o__Methanosarcinales	f__Methanosarcinaceae	g__Methanohalophilus	s__Methanohalophilus_sp._DAL1	2	2	0	0	0	0	2	0	0	0	2	0	14	6	0	10	10	6	0	0	0	0	0	0	2	12	0	2	0	6	16	16	24	14	24	20	190
d__Archaea	k__unclassified_d__Archaea	p__Euryarchaeota	c__Methanomicrobia	o__Methanosarcinales	f__Methanosarcinaceae	g__Methanohalophilus	s__Methanohalophilus_sp._RSK	154	78	118	12	4	14	16	0	16	14	18	16	22	32	20	74	74	66	2	6	0	36	6	22	16	2	6	10	18	38	10	6	18	12	6	10	972
d__Archaea	k__unclassified_d__Archaea	p__Euryarchaeota	c__Methanomicrobia	o__Methanosarcinales	f__Methanosarcinaceae	g__Methanohalophilus	s__Methanohalophilus_sp._T328-1	0	0	6	8	12	6	4	4	8	2	14	0	12	4	6	16	22	16	30	10	20	4	8	4	20	18	18	14	12	34	0	8	2	4	0	8	354
d__Archaea	k__unclassified_d__Archaea	p__Euryarchaeota	c__Methanomicrobia	o__Methanosarcinales	f__Methanosarcinaceae	g__Methanohalophilus	s__Methanohalophilus_sp._WG1-DM	0	0	0	2	0	0	0	0	2	0	4	0	12	10	4	44	32	20	6	16	18	32	6	4	32	34	38	10	18	18	6	8	2	8	6	4	396
d__Archaea	k__unclassified_d__Archaea	p__Euryarchaeota	c__Methanomicrobia	o__Methanosarcinales	f__Methanosarcinaceae	g__Methanolobus	s__Methanolobus_bombayensis	130	84	124	50	38	46	72	48	66	62	58	50	204	162	114	302	752	168	88	144	192	234	74	58	216	214	224	318	240	322	142	114	132	128	128	158	5656
d__Archaea	k__unclassified_d__Archaea	p__Euryarchaeota	c__Methanomicrobia	o__Methanosarcinales	f__Methanosarcinaceae	g__Methanolobus	s__Methanolobus_chelungpuianus	156	90	106	212	196	226	232	212	272	230	238	218	212	236	146	292	246	204	120	144	140	168	76	78	320	272	256	224	222	246	78	38	96	62	96	86	6446
d__Archaea	k__unclassified_d__Archaea	p__Euryarchaeota	c__Methanomicrobia	o__Methanosarcinales	f__Methanosarcinaceae	g__Methanolobus	s__Methanolobus_halotolerans	32	18	34	40	54	110	68	86	58	68	74	64	92	86	66	90	162	60	74	26	54	8	34	24	22	18	32	70	52	32	30	44	38	36	30	54	1940
d__Archaea	k__unclassified_d__Archaea	p__Euryarchaeota	c__Methanomicrobia	o__Methanosarcinales	f__Methanosarcinaceae	g__Methanolobus	s__Methanolobus_profundi	124	62	60	72	48	128	94	82	106	66	76	80	212	192	106	196	344	128	138	110	166	166	66	42	162	158	160	134	126	218	144	118	72	128	110	118	4512
d__Archaea	k__unclassified_d__Archaea	p__Euryarchaeota	c__Methanomicrobia	o__Methanosarcinales	f__Methanosarcinaceae	g__Methanolobus	s__Methanolobus_psychrophilus	270	206	218	320	326	454	614	558	630	450	474	460	332	308	214	256	322	286	240	204	360	78	114	102	230	254	222	182	148	284	270	210	182	180	286	290	10534
d__Archaea	k__unclassified_d__Archaea	p__Euryarchaeota	c__Methanomicrobia	o__Methanosarcinales	f__Methanosarcinaceae	g__Methanolobus	s__Methanolobus_psychrotolerans	156	90	86	46	84	94	70	128	118	74	72	76	324	274	164	258	450	222	38	28	82	66	30	10	126	110	112	246	132	138	86	80	72	126	88	90	4446
d__Archaea	k__unclassified_d__Archaea	p__Euryarchaeota	c__Methanomicrobia	o__Methanosarcinales	f__Methanosarcinaceae	g__Methanolobus	s__Methanolobus_sp.	438	412	346	644	534	784	802	782	970	716	830	718	860	724	652	970	1436	724	480	482	556	438	332	200	1454	1220	1246	1736	1062	1802	560	558	526	544	630	568	27736
d__Archaea	k__unclassified_d__Archaea	p__Euryarchaeota	c__Methanomicrobia	o__Methanosarcinales	f__Methanosarcinaceae	g__Methanolobus	s__Methanolobus_sp._T82-4	102	76	88	464	348	338	466	376	484	324	458	514	378	316	228	528	448	352	188	222	280	176	72	92	642	586	526	422	360	606	256	230	230	192	246	260	11874
d__Archaea	k__unclassified_d__Archaea	p__Euryarchaeota	c__Methanomicrobia	o__Methanosarcinales	f__Methanosarcinaceae	g__Methanolobus	s__Methanolobus_tindarius	30	36	36	48	46	64	56	52	58	44	56	30	54	30	20	76	126	20	10	4	4	10	22	14	84	32	68	182	94	140	50	52	44	40	50	46	1828
d__Archaea	k__unclassified_d__Archaea	p__Euryarchaeota	c__Methanomicrobia	o__Methanosarcinales	f__Methanosarcinaceae	g__Methanolobus	s__Methanolobus_vulcani	26	18	20	90	100	106	100	102	164	146	170	114	124	118	60	240	404	190	28	58	52	98	24	42	264	276	194	320	186	284	32	30	58	44	38	54	4374
d__Archaea	k__unclassified_d__Archaea	p__Euryarchaeota	c__Methanomicrobia	o__Methanosarcinales	f__Methanosarcinaceae	g__Methanolobus	s__Methanolobus_zinderi	254	272	248	602	572	698	666	606	888	698	728	586	582	580	398	484	368	454	292	296	462	302	274	142	718	628	648	512	406	672	304	298	292	340	312	402	16984
d__Archaea	k__unclassified_d__Archaea	p__Euryarchaeota	c__Methanomicrobia	o__Methanosarcinales	f__Methanosarcinaceae	g__Methanomethylovorans	s__Methanomethylovorans_hollandica	52	80	98	76	60	82	122	100	138	128	142	76	198	202	114	118	136	100	212	186	290	200	108	72	244	260	216	172	192	210	202	132	188	200	152	210	5468
d__Archaea	k__unclassified_d__Archaea	p__Euryarchaeota	c__Methanomicrobia	o__Methanosarcinales	f__Methanosarcinaceae	g__Methanomethylovorans	s__Methanomethylovorans_sp.	246	406	268	230	218	216	234	302	356	258	312	234	480	554	408	506	698	434	204	180	260	112	144	84	282	210	180	418	226	336	428	374	342	420	340	320	11220
d__Archaea	k__unclassified_d__Archaea	p__Euryarchaeota	c__Methanomicrobia	o__Methanosarcinales	f__Methanosarcinaceae	g__Methanomethylovorans	s__Methanomethylovorans_sp._PtaU1.Bin073	16	32	28	34	30	30	54	38	46	16	64	52	98	64	48	108	158	88	8	10	16	4	2	14	44	24	18	38	28	42	32	40	10	30	44	22	1430
d__Archaea	k__unclassified_d__Archaea	p__Euryarchaeota	c__Methanomicrobia	o__Methanosarcinales	f__Methanosarcinaceae	g__Methanomethylovorans	s__Methanomethylovorans_sp._PtaU1.Bin093	262	92	172	42	50	48	42	44	74	30	90	42	94	72	40	84	142	78	66	64	96	34	28	36	78	64	38	74	72	78	92	66	60	58	58	74	2634
d__Archaea	k__unclassified_d__Archaea	p__Euryarchaeota	c__Methanomicrobia	o__Methanosarcinales	f__Methanosarcinaceae	g__Methanosalsum	s__Methanosalsum_natronophilum	22	40	44	40	40	28	40	30	24	66	70	50	46	48	40	56	64	64	76	44	42	28	10	62	46	60	50	84	36	54	30	36	50	38	46	52	1656
d__Archaea	k__unclassified_d__Archaea	p__Euryarchaeota	c__Methanomicrobia	o__Methanosarcinales	f__Methanosarcinaceae	g__Methanosalsum	s__Methanosalsum_zhilinae	32	10	14	28	70	104	78	96	94	74	72	34	74	56	28	76	138	70	52	34	40	272	30	34	56	70	44	68	20	84	28	22	28	28	38	22	2118
d__Archaea	k__unclassified_d__Archaea	p__Euryarchaeota	c__Methanomicrobia	o__Methanosarcinales	f__Methanosarcinaceae	g__Methanosarcina	s__Methanosarcina_acetivorans	4194	2916	4264	1892	1784	2520	2482	2856	3546	1664	2154	1942	12626	7182	4448	54728	50360	45674	570	542	628	494	312	222	1606	1526	1422	1252	900	1598	1318	1270	1122	1404	1542	1434	226394
d__Archaea	k__unclassified_d__Archaea	p__Euryarchaeota	c__Methanomicrobia	o__Methanosarcinales	f__Methanosarcinaceae	g__Methanosarcina	s__Methanosarcina_barkeri	606	476	540	1600	1440	1698	1564	1878	1680	1744	1798	1572	1674	1298	772	2888	3374	2300	586	648	768	466	384	264	2310	2118	2134	1902	1538	2368	482	504	516	494	622	616	47622
d__Archaea	k__unclassified_d__Archaea	p__Euryarchaeota	c__Methanomicrobia	o__Methanosarcinales	f__Methanosarcinaceae	g__Methanosarcina	s__Methanosarcina_flavescens	18	10	6	38	76	56	68	72	102	78	62	74	116	102	82	226	272	174	30	40	32	18	2	16	36	16	22	36	50	54	40	50	30	24	14	44	2186
d__Archaea	k__unclassified_d__Archaea	p__Euryarchaeota	c__Methanomicrobia	o__Methanosarcinales	f__Methanosarcinaceae	g__Methanosarcina	s__Methanosarcina_horonobensis	792	670	790	680	696	832	882	928	1130	682	812	680	2930	2130	1314	8260	8092	6622	286	318	358	212	194	182	898	720	842	798	738	998	626	538	598	682	638	602	49150
d__Archaea	k__unclassified_d__Archaea	p__Euryarchaeota	c__Methanomicrobia	o__Methanosarcinales	f__Methanosarcinaceae	g__Methanosarcina	s__Methanosarcina_lacustris	160	80	128	88	114	140	130	166	196	100	112	134	646	394	244	2198	2352	1572	12	16	28	10	14	16	74	68	84	142	168	158	48	52	26	62	46	52	10030
d__Archaea	k__unclassified_d__Archaea	p__Euryarchaeota	c__Methanomicrobia	o__Methanosarcinales	f__Methanosarcinaceae	g__Methanosarcina	s__Methanosarcina_mazei	856	786	822	838	808	1064	932	982	1286	818	882	904	3104	2250	1480	6422	7292	5108	616	686	742	806	290	294	1666	1486	1544	2082	1672	2122	972	810	910	1086	966	1012	56396
d__Archaea	k__unclassified_d__Archaea	p__Euryarchaeota	c__Methanomicrobia	o__Methanosarcinales	f__Methanosarcinaceae	g__Methanosarcina	s__Methanosarcina_siciliae	2592	2118	2836	1640	1678	2096	2198	2460	2704	1756	2054	1854	8638	5214	3518	31846	30474	26804	634	580	788	594	278	250	2224	1940	1888	1544	1232	2196	1384	1550	1444	1508	1542	1560	155616
d__Archaea	k__unclassified_d__Archaea	p__Euryarchaeota	c__Methanomicrobia	o__Methanosarcinales	f__Methanosarcinaceae	g__Methanosarcina	s__Methanosarcina_soligelidi	38	34	54	16	14	8	16	22	30	20	16	34	108	84	58	258	326	256	26	8	32	6	2	0	8	8	10	10	8	4	20	12	24	4	12	14	1600
d__Archaea	k__unclassified_d__Archaea	p__Euryarchaeota	c__Methanomicrobia	o__Methanosarcinales	f__Methanosarcinaceae	g__Methanosarcina	s__Methanosarcina_sp.	3398	2620	3298	2394	2310	3118	3454	3574	3952	2850	3350	2764	9798	7132	4732	27740	30126	22278	1812	1640	2056	1304	990	716	4650	3930	3646	9120	4026	7838	2514	2402	2390	2812	2568	2896	196198
d__Archaea	k__unclassified_d__Archaea	p__Euryarchaeota	c__Methanomicrobia	o__Methanosarcinales	f__Methanosarcinaceae	g__Methanosarcina	s__Methanosarcina_sp._1.H.A.2.2	498	540	432	450	528	676	644	624	730	522	668	632	1540	1182	628	3562	3690	3006	262	270	366	276	132	100	524	482	464	366	348	526	376	384	364	430	386	448	27056
d__Archaea	k__unclassified_d__Archaea	p__Euryarchaeota	c__Methanomicrobia	o__Methanosarcinales	f__Methanosarcinaceae	g__Methanosarcina	s__Methanosarcina_sp._1.H.T.1A.1	672	616	646	1282	1080	1480	1550	1528	1742	1164	1420	1312	2002	1506	994	4720	4564	4218	536	516	772	276	250	156	922	776	798	672	520	874	604	728	660	722	686	758	43722
d__Archaea	k__unclassified_d__Archaea	p__Euryarchaeota	c__Methanomicrobia	o__Methanosarcinales	f__Methanosarcinaceae	g__Methanosarcina	s__Methanosarcina_sp._2.H.A.1B.4	936	790	862	654	632	826	1000	892	1112	700	854	834	1782	1462	950	4010	3900	3172	588	572	750	544	236	200	1510	1260	1354	930	796	1238	1134	1056	1092	1184	1212	1274	42298
d__Archaea	k__unclassified_d__Archaea	p__Euryarchaeota	c__Methanomicrobia	o__Methanosarcinales	f__Methanosarcinaceae	g__Methanosarcina	s__Methanosarcina_sp._2.H.T.1A.15	92	90	120	304	378	494	428	422	460	348	474	394	470	400	272	846	854	848	240	220	272	112	86	106	272	278	258	254	208	342	176	240	150	228	238	214	11588
d__Archaea	k__unclassified_d__Archaea	p__Euryarchaeota	c__Methanomicrobia	o__Methanosarcinales	f__Methanosarcinaceae	g__Methanosarcina	s__Methanosarcina_sp._2.H.T.1A.3	24	16	24	40	28	42	30	32	20	32	42	34	96	70	26	232	272	180	10	4	20	6	6	12	56	62	48	22	14	54	6	8	14	10	14	8	1614
d__Archaea	k__unclassified_d__Archaea	p__Euryarchaeota	c__Methanomicrobia	o__Methanosarcinales	f__Methanosarcinaceae	g__Methanosarcina	s__Methanosarcina_sp._2.H.T.1A.6	4	16	6	2	0	4	6	8	2	6	2	4	34	2	2	108	72	68	0	0	0	0	0	0	0	0	0	0	0	0	0	0	0	0	4	0	350
d__Archaea	k__unclassified_d__Archaea	p__Euryarchaeota	c__Methanomicrobia	o__Methanosarcinales	f__Methanosarcinaceae	g__Methanosarcina	s__Methanosarcina_sp._2.H.T.1A.8	0	0	0	0	0	0	0	0	0	0	0	0	0	0	0	0	0	4	2	2	0	0	4	10	4	2	2	16	4	22	0	0	2	0	0	2	76
d__Archaea	k__unclassified_d__Archaea	p__Euryarchaeota	c__Methanomicrobia	o__Methanosarcinales	f__Methanosarcinaceae	g__Methanosarcina	s__Methanosarcina_sp._795	0	4	2	12	6	2	4	4	4	0	8	4	10	20	4	44	94	52	6	0	0	0	10	6	0	0	0	0	0	0	6	0	2	0	2	0	306
d__Archaea	k__unclassified_d__Archaea	p__Euryarchaeota	c__Methanomicrobia	o__Methanosarcinales	f__Methanosarcinaceae	g__Methanosarcina	s__Methanosarcina_sp._A14	10	10	20	6	4	6	2	16	8	8	2	2	24	10	16	60	116	78	16	12	18	26	2	8	94	106	108	38	38	40	0	10	10	0	2	6	932
d__Archaea	k__unclassified_d__Archaea	p__Euryarchaeota	c__Methanomicrobia	o__Methanosarcinales	f__Methanosarcinaceae	g__Methanosarcina	s__Methanosarcina_sp._Ant1	150	98	104	146	170	160	186	186	210	162	146	170	570	380	336	1416	1870	1002	52	72	74	100	70	56	230	196	246	136	120	198	82	92	86	80	122	120	9594
d__Archaea	k__unclassified_d__Archaea	p__Euryarchaeota	c__Methanomicrobia	o__Methanosarcinales	f__Methanosarcinaceae	g__Methanosarcina	s__Methanosarcina_sp._DH1	164	162	182	222	254	366	354	390	456	340	284	276	526	472	348	674	614	538	310	278	336	188	132	142	696	688	476	466	372	578	368	392	318	364	340	356	13422
d__Archaea	k__unclassified_d__Archaea	p__Euryarchaeota	c__Methanomicrobia	o__Methanosarcinales	f__Methanosarcinaceae	g__Methanosarcina	s__Methanosarcina_sp._DH2	446	432	550	356	294	460	454	456	584	312	416	362	2186	1472	926	7122	7246	6032	148	98	132	84	72	76	158	202	142	120	146	180	202	162	116	192	174	160	32670
d__Archaea	k__unclassified_d__Archaea	p__Euryarchaeota	c__Methanomicrobia	o__Methanosarcinales	f__Methanosarcinaceae	g__Methanosarcina	s__Methanosarcina_sp._KYL-1	2704	2086	2212	2922	2982	4278	4562	4772	5744	2310	2696	1814	39652	26680	16010	71874	82036	51014	804	900	1114	624	432	276	1304	1156	1154	1008	954	1222	1308	1388	1120	1292	1370	1440	345214
d__Archaea	k__unclassified_d__Archaea	p__Euryarchaeota	c__Methanomicrobia	o__Methanosarcinales	f__Methanosarcinaceae	g__Methanosarcina	s__Methanosarcina_sp._Kolksee	396	356	330	292	328	422	310	334	418	354	382	354	384	346	214	402	444	402	148	114	210	118	98	66	292	246	238	252	240	342	280	296	276	256	274	290	10504
d__Archaea	k__unclassified_d__Archaea	p__Euryarchaeota	c__Methanomicrobia	o__Methanosarcinales	f__Methanosarcinaceae	g__Methanosarcina	s__Methanosarcina_sp._MSH10X1	140	150	102	132	130	206	204	138	240	148	188	118	424	332	200	800	818	564	58	50	104	32	62	52	158	118	100	120	112	170	158	174	138	116	98	128	6982
d__Archaea	k__unclassified_d__Archaea	p__Euryarchaeota	c__Methanomicrobia	o__Methanosarcinales	f__Methanosarcinaceae	g__Methanosarcina	s__Methanosarcina_sp._MTP4	1592	1478	1308	2590	2062	3376	3304	3532	4076	1966	2228	1768	12722	10708	5828	27666	36658	21166	1142	1364	1542	1298	866	888	2094	1960	1918	1816	1712	2218	1590	1402	1362	1644	1688	1522	172054
d__Archaea	k__unclassified_d__Archaea	p__Euryarchaeota	c__Methanomicrobia	o__Methanosarcinales	f__Methanosarcinaceae	g__Methanosarcina	s__Methanosarcina_sp._UBA289	12	16	6	30	24	20	22	26	42	22	24	28	66	50	36	138	242	104	4	4	2	0	8	2	48	32	56	122	58	120	14	16	10	22	26	22	1474
d__Archaea	k__unclassified_d__Archaea	p__Euryarchaeota	c__Methanomicrobia	o__Methanosarcinales	f__Methanosarcinaceae	g__Methanosarcina	s__Methanosarcina_sp._UBA411	28	14	30	42	40	38	22	50	50	28	44	20	140	78	68	232	254	164	54	46	54	58	28	14	114	84	116	106	112	112	40	50	26	42	46	26	2470
d__Archaea	k__unclassified_d__Archaea	p__Euryarchaeota	c__Methanomicrobia	o__Methanosarcinales	f__Methanosarcinaceae	g__Methanosarcina	s__Methanosarcina_sp._UBA5	42	50	48	92	148	152	158	156	206	124	158	144	234	152	80	484	586	376	36	30	40	34	14	14	78	76	82	40	34	84	26	16	22	24	26	14	4080
d__Archaea	k__unclassified_d__Archaea	p__Euryarchaeota	c__Methanomicrobia	o__Methanosarcinales	f__Methanosarcinaceae	g__Methanosarcina	s__Methanosarcina_sp._WH1	112	88	118	136	130	152	184	188	162	94	132	86	648	350	210	1686	1708	1320	52	80	62	82	38	34	110	114	98	96	88	162	46	46	56	72	60	38	8838
d__Archaea	k__unclassified_d__Archaea	p__Euryarchaeota	c__Methanomicrobia	o__Methanosarcinales	f__Methanosarcinaceae	g__Methanosarcina	s__Methanosarcina_sp._WWM596	306	354	438	218	210	338	270	214	328	210	272	210	856	670	326	2492	2826	1926	140	124	202	166	70	34	92	86	116	80	124	150	146	152	120	168	192	136	14762
d__Archaea	k__unclassified_d__Archaea	p__Euryarchaeota	c__Methanomicrobia	o__Methanosarcinales	f__Methanosarcinaceae	g__Methanosarcina	s__Methanosarcina_spelaei	68	54	54	90	80	88	92	96	118	50	106	90	264	170	112	404	422	290	86	80	102	92	52	32	116	126	108	116	76	144	88	108	94	114	114	84	4380
d__Archaea	k__unclassified_d__Archaea	p__Euryarchaeota	c__Methanomicrobia	o__Methanosarcinales	f__Methanosarcinaceae	g__Methanosarcina	s__Methanosarcina_thermophila	80	60	50	118	94	126	94	150	152	88	86	120	484	142	106	464	610	412	52	36	56	22	34	24	176	126	150	218	120	284	70	80	78	78	90	82	5212
d__Archaea	k__unclassified_d__Archaea	p__Euryarchaeota	c__Methanomicrobia	o__Methanosarcinales	f__Methanosarcinaceae	g__Methanosarcina	s__Methanosarcina_vacuolata	124	76	84	114	110	162	108	156	176	136	172	156	240	216	150	316	374	288	188	202	240	180	86	78	544	504	564	374	218	378	174	196	184	214	246	232	7960
d__Archaea	k__unclassified_d__Archaea	p__Euryarchaeota	c__Methanomicrobia	o__Methanosarcinales	f__Methanosarcinaceae	g__unclassified_f__Methanosarcinaceae	s__Methanosarcinaceae_archaeon	10246	7766	9690	8622	8070	12294	13860	13566	15454	9750	11950	10188	21974	18976	12416	45418	78104	30682	14044	11294	13234	5520	6656	4370	17830	16140	16404	24564	14306	28824	7328	7424	6804	7808	7610	8096	557282
d__Archaea	k__unclassified_d__Archaea	p__Euryarchaeota	c__Methanomicrobia	o__Methanosarcinales	f__Methermicoccaceae	g__Methermicoccus	s__Methermicoccus_shengliensis	54	30	42	50	70	52	62	58	30	52	26	28	66	42	42	20	28	28	46	28	42	24	10	24	54	60	36	84	52	84	52	56	40	46	52	60	1630
d__Archaea	k__unclassified_d__Archaea	p__Euryarchaeota	c__Methanomicrobia	o__Methanosarcinales	f__Methermicoccaceae	g__Methermicoccus	s__Methermicoccus_sp.	0	0	0	24	8	10	6	12	4	26	8	12	30	10	12	12	12	0	0	4	0	0	2	2	46	44	48	232	66	98	14	8	8	24	8	10	800
d__Archaea	k__unclassified_d__Archaea	p__Euryarchaeota	c__Methanomicrobia	o__Methanosarcinales	f__unclassified_o__Methanosarcinales	g__Candidatus_Argoarchaeum	s__Candidatus_Argoarchaeum_ethanivorans	246	186	194	346	374	550	674	532	924	324	474	372	386	368	424	234	388	252	568	542	592	268	400	248	2580	2254	2114	2142	1772	3120	692	590	642	630	726	740	27868
d__Archaea	k__unclassified_d__Archaea	p__Euryarchaeota	c__Methanomicrobia	o__Methanosarcinales	f__unclassified_o__Methanosarcinales	g__Candidatus_Syntrophoarchaeum	s__Candidatus_Syntrophoarchaeum_butanivorans	134	98	86	86	48	80	114	96	102	96	102	124	102	114	56	72	38	50	138	150	134	78	60	44	124	78	106	126	104	152	104	138	78	114	142	114	3582
d__Archaea	k__unclassified_d__Archaea	p__Euryarchaeota	c__Methanomicrobia	o__Methanosarcinales	f__unclassified_o__Methanosarcinales	g__Candidatus_Syntrophoarchaeum	s__Candidatus_Syntrophoarchaeum_caldarius	108	98	86	70	52	88	74	48	92	80	106	74	164	176	150	126	152	92	118	72	140	42	50	22	150	110	90	176	128	208	124	122	90	156	118	98	3850
d__Archaea	k__unclassified_d__Archaea	p__Euryarchaeota	c__Methanomicrobia	o__Methanosarcinales	f__unclassified_o__Methanosarcinales	g__Candidatus_Syntrophoarchaeum	s__Candidatus_Syntrophoarchaeum_sp.	216	182	218	164	140	248	272	250	318	232	228	228	422	344	282	194	280	240	160	206	198	110	136	138	708	702	694	1606	1078	1450	388	382	328	440	412	378	13972
d__Archaea	k__unclassified_d__Archaea	p__Euryarchaeota	c__Methanomicrobia	o__Methanosarcinales	f__unclassified_o__Methanosarcinales	g__Candidatus_Syntrophoarchaeum	s__Candidatus_Syntrophoarchaeum_sp._GoM_oil	72	36	42	6	18	18	30	48	30	38	44	22	28	52	14	54	70	54	48	30	42	28	24	18	54	28	34	100	90	128	34	46	26	30	28	42	1506
d__Archaea	k__unclassified_d__Archaea	p__Euryarchaeota	c__Methanomicrobia	o__Methanosarcinales	f__unclassified_o__Methanosarcinales	g__Candidatus_Syntrophoarchaeum	s__Candidatus_Syntrophoarchaeum_sp._WYZ-LMO15	68	32	66	26	24	52	48	28	54	54	56	42	92	130	66	30	38	78	60	44	66	10	30	10	22	14	20	24	32	38	54	34	38	40	40	48	1608
d__Archaea	k__unclassified_d__Archaea	p__Euryarchaeota	c__Methanomicrobia	o__Methanosarcinales	f__unclassified_o__Methanosarcinales	g__unclassified_o__Methanosarcinales	s__ANME-2_cluster_archaeon	5566	4492	4594	4686	4444	6028	6268	6192	7162	5510	6744	5432	6532	6050	4398	4916	5334	5004	4978	4262	4890	3130	3048	2340	9286	7828	7738	11294	7652	14128	4376	4346	4074	4264	4354	4642	205982
d__Archaea	k__unclassified_d__Archaea	p__Euryarchaeota	c__Methanomicrobia	o__Methanosarcinales	f__unclassified_o__Methanosarcinales	g__unclassified_o__Methanosarcinales	s__ANME-2_cluster_archaeon_HR1	94	60	66	116	120	144	128	100	110	110	112	60	148	112	70	86	62	74	126	96	208	58	46	34	122	108	110	146	84	146	72	130	80	78	100	138	3654
d__Archaea	k__unclassified_d__Archaea	p__Euryarchaeota	c__Methanomicrobia	o__Methanosarcinales	f__unclassified_o__Methanosarcinales	g__unclassified_o__Methanosarcinales	s__Methanosarcinales_archaeon	7874	6694	7238	8276	8026	10044	11130	10502	12714	9894	11836	10114	9716	9064	6526	7244	7052	7442	9822	8266	10140	5132	4998	3782	14012	12994	12618	19300	11982	21532	8124	7762	7616	8596	8272	8690	345024
d__Archaea	k__unclassified_d__Archaea	p__Euryarchaeota	c__Methanomicrobia	o__Methanosarcinales	f__unclassified_o__Methanosarcinales	g__unclassified_o__Methanosarcinales	s__Methanosarcinales_archaeon_ANME-1_ERB6	338	350	284	532	512	644	688	688	968	504	630	650	504	426	314	292	294	406	560	444	606	222	244	220	568	398	380	862	538	860	324	354	250	534	338	334	17060
d__Archaea	k__unclassified_d__Archaea	p__Euryarchaeota	c__Methanomicrobia	o__Methanosarcinales	f__unclassified_o__Methanosarcinales	g__unclassified_o__Methanosarcinales	s__Methanosarcinales_archaeon_ANME-1_ERB7	782	474	636	590	532	600	448	518	636	410	506	474	508	546	386	458	352	434	412	304	382	254	266	222	760	800	764	1018	744	1214	432	342	366	404	414	398	18786
d__Archaea	k__unclassified_d__Archaea	p__Euryarchaeota	c__Methanomicrobia	o__Methanosarcinales	f__unclassified_o__Methanosarcinales	g__unclassified_o__Methanosarcinales	s__Methanosarcinales_archaeon_ANME-2c_ERB4	386	356	346	692	588	730	756	752	780	638	706	586	586	608	400	352	302	458	448	380	494	430	402	296	710	586	584	846	640	1004	514	418	402	438	474	470	19558
d__Archaea	k__unclassified_d__Archaea	p__Euryarchaeota	c__Methanomicrobia	o__Methanosarcinales	f__unclassified_o__Methanosarcinales	g__unclassified_o__Methanosarcinales	s__Methanosarcinales_archaeon_Met12	26	22	20	26	10	0	16	10	4	8	8	8	22	28	32	24	8	6	22	24	10	26	14	10	20	16	8	16	24	18	22	20	28	32	24	26	638
d__Archaea	k__unclassified_d__Archaea	p__Euryarchaeota	c__Methanomicrobia	o__Methanosarcinales	f__unclassified_o__Methanosarcinales	g__unclassified_o__Methanosarcinales	s__Methanosarcinales_archaeon_ex4484_138	8	12	12	18	6	8	8	6	4	12	26	12	12	2	16	26	46	30	12	8	4	6	0	12	106	50	54	274	100	214	4	0	6	2	0	6	1122
d__Archaea	k__unclassified_d__Archaea	p__Euryarchaeota	c__Methanomicrobia	o__Methanosarcinales	f__unclassified_o__Methanosarcinales	g__unclassified_o__Methanosarcinales	s__Methanosarcinales_archaeon_ex4572_44	0	4	0	36	26	18	18	36	16	12	10	20	12	0	4	6	4	4	30	38	34	24	22	18	30	12	40	18	18	16	4	12	4	2	2	0	550
d__Archaea	k__unclassified_d__Archaea	p__Euryarchaeota	c__Methanomicrobia	o__Methanosarcinales	f__unclassified_o__Methanosarcinales	g__unclassified_o__Methanosarcinales	s__Methanosarcinales_archeaon_56_1174	2	0	0	0	4	6	12	4	18	4	2	12	2	0	0	0	0	0	2	0	0	0	0	2	20	16	4	24	6	16	10	4	4	4	4	0	182
d__Archaea	k__unclassified_d__Archaea	p__Euryarchaeota	c__Methanomicrobia	o__Methanotrichales	f__Methanotrichaceae	g__Methanocrinis	s__Candidatus_Methanocrinis_alkalitolerans	104	92	104	52	56	96	58	94	104	56	84	78	288	438	480	1134	1214	616	60	70	98	68	86	90	74	64	102	104	82	202	138	160	110	216	138	158	7168
d__Archaea	k__unclassified_d__Archaea	p__Euryarchaeota	c__Methanomicrobia	o__Methanotrichales	f__Methanotrichaceae	g__Methanocrinis	s__Candidatus_Methanocrinis_natronophilus	134	98	100	52	60	64	96	104	78	70	90	74	172	194	236	822	946	446	100	84	90	44	36	12	46	26	48	58	36	96	54	50	68	74	68	72	4898
d__Archaea	k__unclassified_d__Archaea	p__Euryarchaeota	c__Methanomicrobia	o__Methanotrichales	f__Methanotrichaceae	g__Methanothrix	s__Methanosaeta_sp._ASM2	0	2	2	0	0	0	0	0	0	2	0	0	10	12	0	20	10	12	0	0	0	0	0	0	0	0	0	0	0	0	0	0	0	0	0	0	70
d__Archaea	k__unclassified_d__Archaea	p__Euryarchaeota	c__Methanomicrobia	o__Methanotrichales	f__Methanotrichaceae	g__Methanothrix	s__Methanosaeta_sp._ASO1	0	0	0	0	0	0	0	0	2	4	0	2	8	4	2	6	8	4	0	0	0	0	0	0	0	0	0	0	0	0	0	0	0	0	0	2	42
d__Archaea	k__unclassified_d__Archaea	p__Euryarchaeota	c__Methanomicrobia	o__Methanotrichales	f__Methanotrichaceae	g__Methanothrix	s__Methanosaeta_sp._ASP1-1	2	2	2	6	8	4	8	10	14	8	16	10	12	6	4	26	16	20	2	8	0	2	0	2	4	2	6	0	0	0	12	12	4	10	14	6	258
d__Archaea	k__unclassified_d__Archaea	p__Euryarchaeota	c__Methanomicrobia	o__Methanotrichales	f__Methanotrichaceae	g__Methanothrix	s__Methanosaeta_sp._ASP1-2	4	2	4	0	0	0	4	4	0	0	0	0	0	12	6	16	16	6	0	0	0	0	0	0	0	0	0	0	0	2	2	2	2	0	0	6	88
d__Archaea	k__unclassified_d__Archaea	p__Euryarchaeota	c__Methanomicrobia	o__Methanotrichales	f__Methanotrichaceae	g__Methanothrix	s__Methanosaeta_sp._NSM2	10	12	6	6	10	0	0	4	4	2	12	4	2	10	2	12	12	12	0	0	0	0	0	0	2	0	0	6	0	2	0	0	0	8	4	2	144
d__Archaea	k__unclassified_d__Archaea	p__Euryarchaeota	c__Methanomicrobia	o__Methanotrichales	f__Methanotrichaceae	g__Methanothrix	s__Methanosaeta_sp._NSP1	88	46	84	4	6	14	18	6	14	4	12	12	12	12	10	26	34	44	14	8	8	36	38	26	12	6	2	4	18	10	2	18	6	32	8	10	704
d__Archaea	k__unclassified_d__Archaea	p__Euryarchaeota	c__Methanomicrobia	o__Methanotrichales	f__Methanotrichaceae	g__Methanothrix	s__Methanosaeta_sp._PtaB.Bin005	122	82	106	24	28	64	76	54	44	42	52	48	44	46	48	84	44	62	16	14	22	14	16	22	96	100	96	120	82	182	400	332	342	600	422	420	4366
d__Archaea	k__unclassified_d__Archaea	p__Euryarchaeota	c__Methanomicrobia	o__Methanotrichales	f__Methanotrichaceae	g__Methanothrix	s__Methanosaeta_sp._PtaB.Bin018	32	22	46	12	22	20	24	14	24	10	18	12	56	50	40	184	208	136	4	0	4	2	2	12	18	14	12	18	8	20	26	34	36	44	48	32	1264
d__Archaea	k__unclassified_d__Archaea	p__Euryarchaeota	c__Methanomicrobia	o__Methanotrichales	f__Methanotrichaceae	g__Methanothrix	s__Methanosaeta_sp._PtaB.Bin039	322	142	260	90	90	120	118	126	134	130	148	136	658	450	396	1642	1974	1444	262	228	182	280	252	162	288	170	244	274	392	310	82	56	48	52	60	36	11758
d__Archaea	k__unclassified_d__Archaea	p__Euryarchaeota	c__Methanomicrobia	o__Methanotrichales	f__Methanotrichaceae	g__Methanothrix	s__Methanosaeta_sp._PtaB.Bin087	124	104	86	106	58	50	58	86	78	84	78	92	188	216	188	748	744	412	28	16	22	2	6	6	42	32	46	40	30	44	34	38	20	42	36	28	4012
d__Archaea	k__unclassified_d__Archaea	p__Euryarchaeota	c__Methanomicrobia	o__Methanotrichales	f__Methanotrichaceae	g__Methanothrix	s__Methanosaeta_sp._PtaU1.Bin016	18	14	18	68	36	46	54	80	72	56	72	80	74	48	60	234	236	138	30	46	36	36	8	28	20	34	12	20	64	46	36	36	28	24	42	26	1976
d__Archaea	k__unclassified_d__Archaea	p__Euryarchaeota	c__Methanomicrobia	o__Methanotrichales	f__Methanotrichaceae	g__Methanothrix	s__Methanosaeta_sp._PtaU1.Bin028	230	104	164	62	48	76	82	96	56	88	110	58	78	70	50	106	94	80	86	60	76	30	80	16	70	66	70	80	104	100	56	52	62	50	48	42	2800
d__Archaea	k__unclassified_d__Archaea	p__Euryarchaeota	c__Methanomicrobia	o__Methanotrichales	f__Methanotrichaceae	g__Methanothrix	s__Methanosaeta_sp._PtaU1.Bin055	36	18	28	126	128	156	142	132	124	74	108	142	158	210	156	638	706	344	96	94	94	34	52	30	56	28	18	38	44	64	120	122	106	142	134	186	4884
d__Archaea	k__unclassified_d__Archaea	p__Euryarchaeota	c__Methanomicrobia	o__Methanotrichales	f__Methanotrichaceae	g__Methanothrix	s__Methanosaeta_sp._PtaU1.Bin060	116	102	94	114	104	110	124	172	160	140	156	110	296	364	138	288	338	292	64	96	84	50	72	72	244	214	222	284	208	326	122	110	116	84	96	112	5794
d__Archaea	k__unclassified_d__Archaea	p__Euryarchaeota	c__Methanomicrobia	o__Methanotrichales	f__Methanotrichaceae	g__Methanothrix	s__Methanosaeta_sp._PtaU1.Bin112	338	420	286	212	184	272	334	308	446	286	386	354	1260	1134	754	1146	1006	956	274	264	284	230	132	78	558	418	362	402	314	480	416	354	364	422	418	364	16216
d__Archaea	k__unclassified_d__Archaea	p__Euryarchaeota	c__Methanomicrobia	o__Methanotrichales	f__Methanotrichaceae	g__Methanothrix	s__Methanosaeta_sp._SDB	200	184	150	140	150	224	188	148	196	228	246	162	898	1180	1178	8206	8326	4072	158	126	118	106	82	78	168	202	140	242	222	356	226	176	182	186	188	180	29212
d__Archaea	k__unclassified_d__Archaea	p__Euryarchaeota	c__Methanomicrobia	o__Methanotrichales	f__Methanotrichaceae	g__Methanothrix	s__Methanosaeta_sp._UBA356	148	90	84	14	14	36	40	18	58	32	26	40	28	28	24	32	14	8	24	12	28	8	16	8	46	12	6	64	36	58	366	372	344	562	452	298	3446
d__Archaea	k__unclassified_d__Archaea	p__Euryarchaeota	c__Methanomicrobia	o__Methanotrichales	f__Methanotrichaceae	g__Methanothrix	s__Methanosaeta_sp._UBA458	192	150	174	30	18	30	34	46	30	28	8	22	26	32	14	54	34	54	34	52	28	30	30	38	18	8	12	12	12	18	306	286	304	470	416	362	3412
d__Archaea	k__unclassified_d__Archaea	p__Euryarchaeota	c__Methanomicrobia	o__Methanotrichales	f__Methanotrichaceae	g__Methanothrix	s__Methanothrix_harundinacea	252	372	272	310	266	360	372	436	482	354	386	432	1736	2226	2282	13284	13724	6980	180	156	206	224	100	126	450	360	310	524	280	754	380	314	296	432	382	360	50360
d__Archaea	k__unclassified_d__Archaea	p__Euryarchaeota	c__Methanomicrobia	o__Methanotrichales	f__Methanotrichaceae	g__Methanothrix	s__Methanothrix_soehngenii	1072	1086	944	262	228	286	250	272	318	218	328	222	536	580	330	900	984	476	168	162	188	96	200	126	298	210	300	542	350	764	3504	3076	3326	4844	4006	3368	34820
d__Archaea	k__unclassified_d__Archaea	p__Euryarchaeota	c__Methanomicrobia	o__Methanotrichales	f__Methanotrichaceae	g__Methanothrix	s__Methanothrix_sp.	12262	10750	10836	10440	9626	12878	13942	13466	15678	13494	16466	13208	18424	18168	12766	27616	27076	20362	7768	6648	8126	4342	4570	3666	10298	9066	9494	11948	8806	14374	13738	13150	12962	16590	15616	14344	462964
d__Archaea	k__unclassified_d__Archaea	p__Euryarchaeota	c__Methanomicrobia	o__Methanotrichales	f__Methanotrichaceae	g__Methanothrix	s__Methanothrix_thermoacetophila	6	4	10	4	18	0	8	8	8	46	40	10	18	12	12	2	14	6	0	0	0	0	2	0	10	14	18	12	24	10	8	20	4	6	8	16	378
d__Archaea	k__unclassified_d__Archaea	p__Euryarchaeota	c__Methanomicrobia	o__Methanotrichales	f__Methanotrichaceae	g__unclassified_f__Methanotrichaceae	s__Methanotrichaceae_archaeon	7032	6648	6356	7580	6744	9446	9352	10252	11900	7808	9044	7808	24014	33230	13598	39186	26634	31838	4072	3576	4854	3220	2326	1824	7896	7346	7228	6376	5224	8702	6182	6198	5898	6674	6820	6544	369430
d__Archaea	k__unclassified_d__Archaea	p__Euryarchaeota	c__Methanomicrobia	o__unclassified_c__Methanomicrobia	f__unclassified_c__Methanomicrobia	g__unclassified_c__Methanomicrobia	s__Methanomicrobia_archaeon	1324	1226	1398	1342	1282	1728	1868	1968	2118	1674	1862	1642	1716	1718	1276	1514	1464	1236	1764	1456	1800	912	788	540	2412	2086	2100	3206	1874	3486	1172	1298	1258	1236	1344	1444	58532
d__Archaea	k__unclassified_d__Archaea	p__Euryarchaeota	c__Methanonatronarchaeia	o__Methanonatronarchaeales	f__Methanonatronarchaeaceae	g__Candidatus_Methanohalarchaeum	s__Candidatus_Methanohalarchaeum_thermophilum	40	42	30	114	66	70	60	54	70	48	46	56	38	80	42	122	58	74	8	16	14	4	14	6	30	52	44	62	76	70	114	134	86	128	134	126	2228
d__Archaea	k__unclassified_d__Archaea	p__Euryarchaeota	c__Methanonatronarchaeia	o__Methanonatronarchaeales	f__Methanonatronarchaeaceae	g__Methanonatronarchaeum	s__Methanonatronarchaeum_sp._AMET-Sl	0	0	0	10	18	4	22	30	10	26	26	4	4	0	0	0	0	2	4	0	2	0	4	0	0	2	0	10	12	4	0	0	0	0	0	0	194
d__Archaea	k__unclassified_d__Archaea	p__Euryarchaeota	c__Methanonatronarchaeia	o__Methanonatronarchaeales	f__Methanonatronarchaeaceae	g__Methanonatronarchaeum	s__Methanonatronarchaeum_sp._AMET6-2	6	8	2	16	16	12	18	8	12	8	18	10	2	4	8	4	0	6	6	8	6	0	10	0	0	0	0	0	0	2	4	2	0	4	2	0	202
d__Archaea	k__unclassified_d__Archaea	p__Euryarchaeota	c__Methanonatronarchaeia	o__Methanonatronarchaeales	f__Methanonatronarchaeaceae	g__Methanonatronarchaeum	s__Methanonatronarchaeum_thermophilum	28	28	12	0	0	4	0	0	12	4	6	4	0	0	2	0	0	0	20	6	6	4	4	0	10	4	10	20	14	34	4	2	2	4	0	2	246
d__Archaea	k__unclassified_d__Archaea	p__Euryarchaeota	c__Methanonatronarchaeia	o__Methanonatronarchaeales	f__unclassified_o__Methanonatronarchaeales	g__unclassified_o__Methanonatronarchaeales	s__Methanonatronarchaeales_archaeon	20	12	12	42	36	38	40	28	28	70	74	50	22	22	12	28	38	36	32	20	34	12	8	8	28	24	26	16	24	20	18	26	18	16	24	16	978
d__Archaea	k__unclassified_d__Archaea	p__Euryarchaeota	c__Methanonatronarchaeia	o__unclassified_c__Methanonatronarchaeia	f__unclassified_c__Methanonatronarchaeia	g__unclassified_c__Methanonatronarchaeia	s__Methanonatronarchaeia_archaeon	0	2	6	8	2	2	2	6	2	8	6	2	0	0	0	4	6	12	0	0	0	0	0	2	0	0	0	0	0	0	0	0	0	0	0	0	70
d__Archaea	k__unclassified_d__Archaea	p__Euryarchaeota	c__Methanopyri	o__Methanopyrales	f__Methanopyraceae	g__Methanopyrus	s__Methanopyrus_kandleri	12	6	6	16	8	12	14	22	12	32	10	14	60	40	30	14	22	24	6	6	6	8	40	0	38	20	12	102	56	164	4	4	6	2	2	4	834
d__Archaea	k__unclassified_d__Archaea	p__Euryarchaeota	c__Methanopyri	o__Methanopyrales	f__Methanopyraceae	g__Methanopyrus	s__Methanopyrus_sp._KOL6	26	10	24	2	14	6	2	2	6	4	8	6	4	6	4	0	4	2	4	10	10	30	8	16	10	10	10	8	16	16	6	8	10	2	12	2	318
d__Archaea	k__unclassified_d__Archaea	p__Euryarchaeota	c__Methanopyri	o__Methanopyrales	f__Methanopyraceae	g__Methanopyrus	s__Methanopyrus_sp._SNP6	0	0	0	0	0	4	10	4	4	26	20	2	0	0	0	4	0	0	6	0	4	0	0	0	0	0	0	14	2	4	0	0	0	0	0	0	104
d__Archaea	k__unclassified_d__Archaea	p__Euryarchaeota	c__Methanopyri	o__unclassified_c__Methanopyri	f__unclassified_c__Methanopyri	g__unclassified_c__Methanopyri	s__Methanopyri_archaeon	4	8	4	10	10	6	12	10	18	10	8	4	10	30	4	2	2	4	12	28	18	0	4	16	58	22	52	16	12	26	12	12	14	26	12	0	496
d__Archaea	k__unclassified_d__Archaea	p__Euryarchaeota	c__Theionarchaea	o__unclassified_c__Theionarchaea	f__unclassified_c__Theionarchaea	g__unclassified_c__Theionarchaea	s__Theionarchaea_archaeon	4786	3562	4260	3824	3734	5050	5210	5008	5962	4666	5560	4772	4748	4424	3222	3336	2892	3744	4484	3820	4870	2660	2418	1830	5748	5174	5266	6956	4468	8654	3504	3766	3300	3880	3902	4090	157550
d__Archaea	k__unclassified_d__Archaea	p__Euryarchaeota	c__Theionarchaea	o__unclassified_c__Theionarchaea	f__unclassified_c__Theionarchaea	g__unclassified_c__Theionarchaea	s__Theionarchaea_archaeon_DG-70	592	346	420	314	330	492	484	418	510	406	512	408	514	564	404	360	350	268	448	360	506	330	178	122	642	512	470	656	580	728	626	666	652	604	798	746	17316
d__Archaea	k__unclassified_d__Archaea	p__Euryarchaeota	c__Theionarchaea	o__unclassified_c__Theionarchaea	f__unclassified_c__Theionarchaea	g__unclassified_c__Theionarchaea	s__Theionarchaea_archaeon_DG-70-1	1986	1384	1832	1262	1164	1930	1812	1736	2166	1624	1890	1534	1512	1522	878	958	748	1036	1004	988	1288	862	488	330	1560	1326	1178	1512	866	1794	1200	1116	1060	1068	1174	1278	47066
d__Archaea	k__unclassified_d__Archaea	p__Euryarchaeota	c__Thermococci	o__Thermococcales	f__Thermococcaceae	g__Palaeococcus	s__Palaeococcus_ferrophilus	22	30	20	12	6	16	6	10	14	4	14	4	30	46	56	48	62	38	40	44	78	124	24	10	198	186	184	70	74	156	78	68	58	68	70	66	2034
d__Archaea	k__unclassified_d__Archaea	p__Euryarchaeota	c__Thermococci	o__Thermococcales	f__Thermococcaceae	g__Palaeococcus	s__Palaeococcus_pacificus	48	20	22	34	40	26	28	24	38	24	58	44	48	32	18	20	16	12	6	20	24	36	10	12	10	20	14	50	16	36	52	40	34	60	44	46	1082
d__Archaea	k__unclassified_d__Archaea	p__Euryarchaeota	c__Thermococci	o__Thermococcales	f__Thermococcaceae	g__Palaeococcus	s__Palaeococcus_sp._(in:_euryarchaeotes)	0	6	2	26	18	4	10	8	14	16	24	12	12	32	8	12	14	12	2	6	4	2	2	0	24	28	28	38	24	44	6	10	12	6	12	12	490
[truncated: 43,627 more rows]
