# Supplementary material for: Divergent microbial community and functional dynamics in mangrove sediments along a polycyclic aromatic hydrocarbons (PAHs) gradient in China
Source: Research Square preprint supplement (doi:10.21203/rs.3.rs-7178259/v1), 2025-09-17
Supplement: Supplementary file 14 [file b4d15eea17dd0935780578eb.xlsx]

## Sheet: PAH
#sampleID	lon	lat	NO3	NH4	TOC	TN	Gravel	Sand	Silt	Clay	Naphthalene	Acenaphthylene	Acenaphthene	Fluorene	Phenanthrene	Anthracene	Fluoranthene	Pyrene	Benz[a]anthracene	Chrysene	Benzo[b]fluoranthene	Benzo[j]fluoranthene	Benzo[k]fluoranthene	Benzo[e]pyrene	Benzo[a]pyrene	Indeno[1,2,3-cd]pyrene	Dibenz[a,h]anthracene	Benzo[ghi]perylene	Total PAHs	LMW PAHs%	HMW PAHs%
DY_1	117.897	24.3552	0	0.00388425	13.45	0.67	0	25.2234	60.5434	14.2332	44.894	7.20293	1.41078	7.57443	62.5891	13.5396	85.8848	94.0347	29.9573	117.285	60.8424	15.4164	27.2427	45.1037	37.8484	1.00802	5.88594	7.18978	664.91	0.20636	0.79364
DY_2	117.897	24.3552	0	0.00491198	13.46	0.65	4.20215e-11	15.4332	68.7508	15.8161	39.3753	1.74686	0	3.23141	23.7377	3.9959	41.8371	38.5773	9.44062	122.635	12.6086	10.9964	6.90103	14.8175	97.4672	0.053494	0.392904	1.87782	429.692	0.167765	0.832235
DY_3	117.897	24.3552	0	0.00831555	12.68	0.57	2.10892e-07	18.3236	65.1419	16.5344	21.4895	1.50743	3.55956	4.7044	31.2393	7.10407	55.6926	52.8024	14.1385	138.133	38.1783	6.99243	13.1759	19.7551	196.473	0.653987	0.592616	0.997282	607.189	0.114634	0.885366
FG_SC_1	117.909	24.3945	0	0.00491941	14.06	0.6	0	0	65.8707	34.1293	10.6959	0.986301	0.215086	8.6886	9.10142	0.989572	13.443	9.40048	2.93928	44.0849	9.6967	1.95181	1.00793	6.74869	26.4502	0.425196	0.984359	0.0155323	147.825	0.207522	0.792478
FG_SC_2	117.909	24.3945	5.66405e-05	0.00763927	13.87	0.72	1.42109e-14	7.01651	73.6527	19.3308	22.4878	0.99988	0.134888	0.264184	10.379	0.699774	15.6314	11.0964	2.92273	53.4822	8.34371	2.29445	2.40647	7.38154	34.3467	0.882024	0.14637	0.399192	174.299	0.200607	0.799393
FG_SC_3	117.909	24.3945	0.000225678	0.00654524	13.69	0.52	2.53795e-07	9.89416	71.5017	18.6041	12.4582	0.775276	0.253429	0.162081	9.25125	1.00726	15.5089	10.9016	3.45403	46.412	8.79939	0.866503	2.39059	7.31499	21.3037	0	0.278209	0.676975	141.814	0.168583	0.831417
FG_WR_1	117.91	24.3944	0.000713468	0.0122902	13.11	0.67	9.19442e-12	9.57894	73.3803	17.0407	14.8111	0.758853	0.522696	0.173413	7.66935	0	8.13485	3.35959	0.700512	33.0022	0.449627	1.35672	1.60165	4.93009	5.05646	0.292282	0.418447	0.3827	83.6206	0.286238	0.713762
FG_WR_2	117.91	24.3944	0.000567323	0.0163148	15.44	0.63	3.27995	13.7167	67.1897	15.8136	7.53527	0.460373	0.535532	0.27867	2.16945	0.0607879	0.797164	2.48765	0.637994	0.30686	0.104399	0.110281	0.0527686	1.1735	0.239136	0.0198107	0.180097	0.112461	17.2622	0.639553	0.360447
FG_WR_3	117.91	24.3944	0.00390893	0.00534265	13.42	0.8	5.68434e-14	24.4141	60.5758	15.0101	16.5084	0.781179	0	0	10.7778	0.629212	12.517	6.07242	1.42785	44.4505	6.26977	0	1.26009	5.65009	7.56599	0.220112	0.608107	2.46227	117.201	0.24485	0.75515
CPT_LW_1	117.903	24.3927	0.000494534	0.00753782	25.66	0.83	1.16267e-07	17.3055	67.6857	15.0088	1.15536	0.490151	0.0291756	11.7986	0.401784	1.22983	0.383429	0.638368	0.0775015	1.18914	0.397831	0.21522	0.271742	0.156524	0.176089	0.15435	0.206524	0.117393	19.089	0.791288	0.208712
CPT_LW_2	117.903	24.3927	0.000357268	0.00684259	26	0.49	0	28.0728	60.0418	11.8854	1.15536	0.490151	0.0291756	11.7986	0.401784	1.22983	0.383429	0.638368	0.0775015	1.18914	0.397831	0.21522	0.271742	0.156524	0.176089	0.15435	0.206524	0.117393	19.089	0.791288	0.208712
CPT_LW_3	117.903	24.3927	0.000316799	0.00751943	29.1	0.71	1.42109e-14	22.5236	63.2271	14.2494	1.15536	0.490151	0.0291756	11.7986	0.401784	1.22983	0.383429	0.638368	0.0775015	1.18914	0.397831	0.21522	0.271742	0.156524	0.176089	0.15435	0.206524	0.117393	19.089	0.791288	0.208712
CPT_MZ_1	117.903	24.3929	0.00055729	0.00491807	25.19	0.5	6.97099e-10	20.7992	66.7594	12.4413	1.24691	0.134691	0.151017	6.31632	0.341473	0.353597	0.103048	0.00808221	0.0565754	0.290528	0.203599	0.73204	0.63596	0.19216	0.51014	0.386609	0.256214	0.137257	12.0562	0.70868	0.29132
CPT_MZ_2	117.903	24.3929	0.000155246	0.00551406	28.13	0.66	0	24.289	59.8358	15.8752	1.24691	0.134691	0.151017	6.31632	0.341473	0.353597	0.103048	0.00808221	0.0565754	0.290528	0.203599	0.73204	0.63596	0.19216	0.51014	0.386609	0.256214	0.137257	12.0562	0.70868	0.29132
CPT_MZ_3	117.903	24.3929	0.00055311	0.00519007	27.72	0.69	0	14.5663	65.0176	20.4161	1.24691	0.134691	0.151017	6.31632	0.341473	0.353597	0.103048	0.00808221	0.0565754	0.290528	0.203599	0.73204	0.63596	0.19216	0.51014	0.386609	0.256214	0.137257	12.0562	0.70868	0.29132
CPT_SW_1	117.903	24.393	0.000276966	0.00349436	21.35	0.53	0.000815211	20.7824	65.3916	13.8252	2.17766	0.17253	0.189362	11.0104	1.52997	2.23676	0.0402066	0.256052	0.061368	0.533579	0.746023	0.72132	0.602747	0.491585	0.560752	0.0666974	0.106222	0.0296433	21.5328	0.804197	0.195803
CPT_SW_2	117.903	24.393	0.000287887	0.00253804	21.86	0.54	0	16.8891	68.1773	14.9336	2.17766	0.17253	0.189362	11.0104	1.52997	2.23676	0.0402066	0.256052	0.061368	0.533579	0.746023	0.72132	0.602747	0.491585	0.560752	0.0666974	0.106222	0.0296433	21.5328	0.804197	0.195803
CPT_SW_3	117.903	24.393	0.000133371	0.00383704	19.72	0.44	1.47836e-07	29.7498	59.556	10.6942	2.17766	0.17253	0.189362	11.0104	1.52997	2.23676	0.0402066	0.256052	0.061368	0.533579	0.746023	0.72132	0.602747	0.491585	0.560752	0.0666974	0.106222	0.0296433	21.5328	0.804197	0.195803
M1_1_1	109.179	21.4139	0.000155457	0.00755161	2.84	0.08	14.41	69.64	14.88	1.07	11.7925	0.0585435	13.6428	2.93759	10.8734	12.955	10.9949	12.7597	7.42284	1.74539	4.34701	0.664272	0.754444	12.0023	1.4301	0.941456	0.250215	4.20105	109.774	0.47607	0.52393
M1_1_2	109.179	21.4139	4.24924e-05	0.00633137	2.13	0.11	9.19	77.13	12.8	0.88	3.02048	0	6.4542	11.8331	41.9841	59.6971	39.11	44.6876	41.2098	5.87759	14.1982	4.33231	2.37566	8.09544	8.0935	30.877	12.9654	14.6016	349.413	0.351987	0.648013
M1_1_3	109.179	21.4139	0	0.0107555	3.48	0.16	13.47	78.19	7.75	0.59	23.8966	14.8386	17.2084	27.003	29.3417	65.6843	34.5356	21.3267	30.5017	2.97472	18.3599	7.49051	8.20477	7.38918	13.0214	18.4607	18.4056	12.2362	370.88	0.479866	0.520134
M1_2_1	109.179	21.4129	4.46258e-05	0.00485429	0.86	0	9.35	84.7	5.49	0.46	9.34445	0.0639382	1.64255	1.2113	4.57762	6.87335	2.46841	3.15698	12.0338	0.508323	0.5895	0.564162	0.310297	12.3153	0.265516	0.0153996	0.34859	0.36519	56.6546	0.418557	0.581443
M1_2_2	109.179	21.4129	0.000304099	0.00830774	4.27	0.25	8.75	75.7	14.68	0.87	18	2.67432	0.381391	3.06637	24.4	29.344	9.6218	10.8264	18.5285	12.2666	16.1548	16.1949	17.9571	25.9131	3.36188	22.7989	20.2559	19.112	270.858	0.287479	0.712521
M1_2_3	109.179	21.4129	0.000131583	0.00488	1.87	0.08	8.01	82.45	9.16	0.38	25.8229	14.7604	5.37757	8.53586	44.9497	49.4748	13.3853	2.87276	28.9583	0.0809191	2.67582	0	0	2.80301	2.39185	15.1088	13.3854	6.87494	237.458	0.627147	0.372853
M1_3_1	109.179	21.4114	0.00121579	0.0180301	0.71	0	11.88	77.17	10.185	0.765	26.5384	0.0359213	0.5157	0.642026	4.18462	5.87625	2.12448	3.13321	2.1845	0.582872	0.548129	0.0522243	0.212433	1.45127	0.283394	0.138328	0.252269	0.503938	49.26	0.767214	0.232786
M1_3_2	109.179	21.4114	0.000151426	0.0152379	2.04	0.11	8.97	76.415	13.74	0.875	26.5384	0.0359213	0.5157	0.642026	4.18462	5.87625	2.12448	3.13321	2.1845	0.582872	0.548129	0.0522243	0.212433	1.45127	0.283394	0.138328	0.252269	0.503938	49.26	0.767214	0.232786
M1_3_3	109.179	21.4114	0.000578444	0.0225069	1.98	0.09	10.74	80.32	8.455	0.485	26.5384	0.0359213	0.5157	0.642026	4.18462	5.87625	2.12448	3.13321	2.1845	0.582872	0.548129	0.0522243	0.212433	1.45127	0.283394	0.138328	0.252269	0.503938	49.26	0.767214	0.232786
M2_1_1	109.171	21.413	0	0.0273419	37.92	0.98	0	37.7025	56.2706	6.02699	44.0791	0.128712	1.27493	6.39846	33.4909	1.26546	25.8478	21.5509	13.6437	3.95703	18.0035	9.43883	3.20097	13.8255	6.99956	4.04971	0.197956	4.56819	211.921	0.40882	0.59118
M2_1_2	109.171	21.413	0	0	55.69	1.44	0	24.3961	69.8027	5.80124	62.5323	22.35	20.1916	28.8433	124.377	121.377	60.9277	62.1773	71.0953	14.7946	16.0036	19.5442	19.4925	14.3546	35.9181	47.9339	31.2033	33.154	806.27	0.470898	0.529102
M2_1_3	109.171	21.413	0	0	64.36	1.87	8.37446e-10	32.1826	62.258	5.55933	8.37481	2.63876	7.18616	4.65614	29.0005	46.7913	19.1693	25.0222	27.1604	7.87749	20.7645	11.9432	12.6786	19.0473	26.9833	23.3963	23.9825	25.3855	342.058	0.288395	0.711605
M2_2_1	109.171	21.4125	0	0.0178789	45.45	1.27	0	33.3711	60.0582	6.57069	2.87145	0.0821186	8.72748	5.36252	27.7877	2.11429	28.879	24.8203	20.9121	5.1402	29.6225	14.9274	4.00072	19.0477	16.3705	4.45324	0.448883	6.47472	222.043	0.211425	0.788575
M2_2_2	109.171	21.4125	0	0.0261286	40.42	1.46	6.16751e-11	34.5498	58.1831	7.26715	13.2003	5.71295	7.25137	12.2693	74.7242	58.2589	54.0489	62.005	40.2183	5.24606	15.5909	1.63825	2.61823	8.43808	6.84424	25.3822	22.6346	25.7416	441.824	0.387976	0.612024
M2_2_3	109.171	21.4125	0	0.0176194	37	1.03	0	31.02	65.72	3.26	0	3.18096	5.3322	9.24155	24.3016	40.5832	6.42033	8.90018	22.6156	2.07811	3.76114	3.77524	4.41282	3.92687	11.1035	22.3079	27.4089	11.9387	211.289	0.391121	0.608879
M2_3_1	109.171	21.4118	0.000153208	0.00982235	3.88	0.26	0	35.5368	58.1644	6.29884	8.25436	0.0329446	22.0336	3.70099	10.061	1.06087	8.26305	9.27526	4.5656	1.14496	1.3696	0.607867	1.16853	5.49554	3.45426	0.416858	0.468266	1.37799	82.7516	0.545534	0.454466
M2_3_2	109.171	21.4118	1.93936e-05	0.00892107	5.41	0.32	3.08376e-11	29.4729	63.9929	6.5342	8.25436	0.0329446	22.0336	3.70099	10.061	1.06087	8.26305	9.27526	4.5656	1.14496	1.3696	0.607867	1.16853	5.49554	3.45426	0.416858	0.468266	1.37799	82.7516	0.545534	0.454466
M2_3_3	109.171	21.4118	0.000364878	0.00924756	5.43	0.3	4.18723e-10	31.6013	63.989	4.40967	8.25436	0.0329446	22.0336	3.70099	10.061	1.06087	8.26305	9.27526	4.5656	1.14496	1.3696	0.607867	1.16853	5.49554	3.45426	0.416858	0.468266	1.37799	82.7516	0.545534	0.454466
M3_1_1	109.154	21.5068	0.000215537	0.0485197	27.42	1.2	0	28.1369	65.3606	6.50254	25.7912	1.81076	3.6599	3.52627	23.1243	4.65464	38.7258	37.4729	9.15357	123.967	22.7842	5.1394	9.84299	22.2868	143.225	70.5358	20.5171	60.2968	626.514	0.0998655	0.900135
M3_1_2	109.154	21.5068	0.000177883	0.0309781	28.64	1.33	0	29.8399	64.9526	5.20752	16.765	4.47908	1.48715	10.0625	130.366	55.4525	130.997	161.95	75.3327	28.3663	13.673	13.6648	17.9604	41.4472	30.8367	85.2153	19.5254	100.445	938.026	0.233056	0.766944
M3_1_3	109.154	21.5068	0.00068394	0.0461153	27.49	1.17	0	24.7222	68.6234	6.65445	16.1548	17.8361	4.23703	7.15932	68.0813	42.7713	47.8036	42.0983	30.4332	95.2876	18.2128	12.7247	12.1754	69.6931	43	60.1747	49.805	22.1149	659.763	0.236812	0.763188
M3_2_1	109.154	21.5069	0.00049234	0.0380762	22.76	1.04	7.93	59.42	30.24	2.41	60.4592	5.58862	2.13388	6.29152	41.2141	8.55601	48.7506	56.2854	16.6811	232.683	37.1464	10.613	14.8467	36.4399	25.1819	72.3653	33.3878	46.2651	754.89	0.164585	0.835415
M3_2_2	109.154	21.5069	0.000660227	0.0569905	24.7	1.12	5.32	45.62	45.31	3.75	37.2978	4.57451	3.87124	5.33144	48.532	33.897	38.7745	47.2607	34.883	124.217	43.4639	12.7818	13.6311	31.8168	33.4583	41.108	46.2551	38.8698	640.024	0.208592	0.791408
M3_2_3	109.154	21.5069	0.000442069	0.039263	26.31	1.54	5.15911e-10	40.6358	54.3203	5.0439	87.2721	32.9538	21.5848	39.2021	171.546	118.319	171.327	208.976	123.665	29.582	77.0703	14.3658	18.8335	43.3755	50.6946	37.6765	22.6733	95.8815	1365	0.344966	0.655034
M3_3_1	109.154	21.5068	7.54855e-05	0.094598	25.3	1.17	3.965	43.7785	47.8003	4.45627	34.8332	5.06369	2.27104	4.4486	31.9953	8.35978	46.7447	51.8229	14.8535	181.944	43.7237	14.8018	16.0305	39.0762	25.097	10.1109	35.4934	84.2207	650.891	0.13362	0.86638
M3_3_2	109.154	21.5068	0.000381898	0.0677194	28.58	0.91	2.66	37.7299	55.1313	4.47876	34.8332	5.06369	2.27104	4.4486	31.9953	8.35978	46.7447	51.8229	14.8535	181.944	43.7237	14.8018	16.0305	39.0762	25.097	10.1109	35.4934	84.2207	650.891	0.13362	0.86638
M3_3_3	109.154	21.5068	0.000197242	0.0406039	19.32	0.82	2.57955e-10	32.679	61.4718	5.84917	34.8332	5.06369	2.27104	4.4486	31.9953	8.35978	46.7447	51.8229	14.8535	181.944	43.7237	14.8018	16.0305	39.0762	25.097	10.1109	35.4934	84.2207	650.891	0.13362	0.86638
M3_4_1	109.154	21.5068	6.11759e-05	0.0151487	13.28	0.6	3.965	43.7785	47.8003	4.45627	21.6205	3.00937	1.59274	2.85715	23.6387	35.7744	35.5054	40.629	31.067	151.53	42.7905	13.7363	45.5352	26.5747	21.3229	30.7927	54.135	61.9731	644.084	0.137393	0.862607
M3_4_2	109.154	21.5068	3.04684e-05	0.015059	13.44	0.55	2.66	37.7299	55.1313	4.47876	21.6205	3.00937	1.59274	2.85715	23.6387	35.7744	35.5054	40.629	31.067	151.53	42.7905	13.7363	45.5352	26.5747	21.3229	30.7927	54.135	61.9731	644.084	0.137393	0.862607
M3_4_3	109.154	21.5068	0.000202726	0.0158329	16.42	0.7	2.57955e-10	32.679	61.4718	5.84917	21.6205	3.00937	1.59274	2.85715	23.6387	35.7744	35.5054	40.629	31.067	151.53	42.7905	13.7363	45.5352	26.5747	21.3229	30.7927	54.135	61.9731	644.084	0.137393	0.862607
Section
DY			0	0.00570393	13.1967	0.63	7.03113e-08	19.6601	64.812	15.5279	35.2529	3.48574	1.65678	5.17008	39.1887	8.21319	61.1382	61.8048	17.8455	126.018	37.2098	11.1351	15.7732	26.5588	110.596	0.571832	2.29049	3.35496	567.264	0.163887	0.836113
FG			0.000912007	0.00884194	13.9317	0.656667	0.546659	10.7701	68.6952	19.9881	14.0828	0.793644	0.276939	1.59449	8.22471	0.564434	11.0054	7.2197	2.01373	36.9564	5.6106	1.09663	1.45325	5.53315	15.827	0.306571	0.435932	0.674856	113.67	0.224659	0.775341
CPT			0.000348052	0.00526572	24.97	0.598889	9.06085e-05	21.6642	63.9658	14.3699	1.52664	0.265791	0.123185	9.70844	0.757741	1.27339	0.175561	0.300834	0.0651483	0.671084	0.449151	0.556193	0.503483	0.28009	0.415661	0.202552	0.189653	0.0947645	17.5594	0.777659	0.222341
M1			0.000291546	0.0109395	2.24222	0.0977778	10.53	77.9683	10.7933	0.708333	19.0547	3.61151	5.13934	6.27926	18.7423	26.8508	12.9433	11.67	16.1343	2.80024	6.44107	3.26698	3.35995	8.09691	3.26827	9.84636	7.37421	6.54475	171.424	0.4648	0.5352
M2			5.972e-05	0.0129955	32.84	0.992222	1.49853e-10	32.2037	62.0488	5.74757	17.3135	3.79915	12.8961	8.6527	38.2072	30.3969	24.4536	25.8113	23.2602	4.72537	11.9839	7.01008	5.54549	10.5696	12.7313	14.3082	11.9201	12.3774	275.962	0.403191	0.596809
M3			0.000301749	0.0424087	22.805	1.0125	2.20833	38.0625	54.8011	4.92807	34.4251	7.62184	4.04711	7.79087	54.1472	33.0045	60.2608	69.2833	35.6591	136.21	39.3244	12.9086	22.6656	36.8343	38.8047	40.8155	38.4208	66.8712	739.095	0.190823	0.809177
