# Supplementary material for: Divergent microbial community and functional dynamics in mangrove sediments along a polycyclic aromatic hydrocarbons (PAHs) gradient in China
Source: Research Square preprint supplement (doi:10.21203/rs.3.rs-7178259/v1), 2025-09-17
Supplement: Supplementary file 15 [file ba2d67782eefc1e8349e2136.xlsx]

## Sheet: PAH_degrading KOs profile
#KO	CPT_LW_1	CPT_LW_2	CPT_LW_3	CPT_MZ_1	CPT_MZ_2	CPT_MZ_3	CPT_SW_1	CPT_SW_2	CPT_SW_3	DY_1	DY_2	DY_3	FG_SC_1	FG_SC_2	FG_SC_3	FG_WR_1	FG_WR_2	FG_WR_3	M1_1_1	M1_1_2	M1_1_3	M1_2_1	M1_2_2	M1_2_3	M2_1_1	M2_1_2	M2_1_3	M2_2_1	M2_2_2	M2_2_3	M3_1_1	M3_1_2	M3_1_3	M3_2_1	M3_2_2	M3_2_3	Total	Description	Hyperlink	CPT	DY	FG	M1	M2	M3
K01897	47466	41282	50042	48552	54580	49028	48806	50856	49122	38250	30326	30356	55660	42278	36158	39326	39100	36650	38340	32918	41010	42062	32250	26446	60834	58486	60590	63458	62194	78760	55000	50470	50664	56944	59102	50388	1707754	long-chain acyl-CoA synthetase [EC:6.2.1.3]	http://www.genome.jp/dbget-bin/www_bget?ko:K01897	48859.3	32977.3	41528.7	35504.3	64053.7	53761.3
K00249	39906	35702	41500	39648	44544	35814	40976	41060	39200	26424	19578	20154	38384	29520	25286	26402	21420	25864	24758	22078	28226	31664	24244	21098	40740	40104	42368	35004	44518	47372	39652	36024	37294	40348	43538	35522	1225934	acyl-CoA dehydrogenase [EC:1.3.8.7]	http://www.genome.jp/dbget-bin/www_bget?ko:K00249	39816.7	22052	27812.7	25344.7	41684.3	38729.7
K00626	27720	24444	29194	29036	31930	28156	30378	30662	29340	19902	15994	15644	29490	23000	19178	21722	19790	21248	19688	16186	21088	22630	17570	15734	30210	28886	29958	29722	29972	37158	28296	26562	25976	29100	32252	26636	914452	acetyl-CoA C-acetyltransferase [EC:2.3.1.9]	http://www.genome.jp/dbget-bin/www_bget?ko:K00626	28984.4	17180	22404.7	18816	30984.3	28137
K01895	19578	16980	19668	20202	22294	18348	21072	21142	20814	18448	14386	14622	26200	19472	16968	19414	18628	17120	14304	11822	14552	18638	14596	12764	19224	18888	20014	19968	20834	25118	26206	23542	24464	28140	30606	24344	713380	acetyl-CoA synthetase [EC:6.2.1.1]	http://www.genome.jp/dbget-bin/www_bget?ko:K01895	20010.9	15818.7	19633.7	14446	20674.3	26217
K01055	16240	14726	17430	17786	19370	16388	18572	19502	17510	10594	7744	8336	17860	13840	10718	11798	9498	11324	10536	9556	12186	13654	8830	7140	18824	17962	18898	18014	19086	23936	18868	16838	17080	19396	22696	17680	550416	3-oxoadipate enol-lactonase [EC:3.1.1.24]	http://www.genome.jp/dbget-bin/www_bget?ko:K01055	17502.7	8891.33	12506.3	10317	19453.3	18759.7
K01426	15886	13872	16424	15892	18284	13892	16566	16594	16010	10378	7654	8098	16874	12968	10534	11422	10174	10572	11038	9896	12890	14376	10652	9010	19288	17924	18852	17320	19148	22240	18604	17000	17036	19278	21006	16482	534134	amidase [EC:3.5.1.4]	http://www.genome.jp/dbget-bin/www_bget?ko:K01426	15935.6	8710	12090.7	11310.3	19128.7	18234.3
K03388	12518	12266	17946	20398	18950	24552	17862	21652	17954	16806	15280	16410	18424	19716	14334	13026	10730	15048	26156	20786	23232	10828	11878	7342	33814	29950	30622	46950	29152	51146	17306	17476	16242	19052	18368	18484	732656	heterodisulfide reductase subunit A2 [EC:1.8.7.3 1.8.98.4 1.8.98.5 1.8.98.6]	http://www.genome.jp/dbget-bin/www_bget?ko:K03388	18233.1	16165.3	15213	16703.7	36939	17821.3
K00123	15718	13404	16132	16720	18004	15596	16372	17370	16458	18246	14960	15038	20324	15328	12828	17034	15614	14114	12246	9548	11614	11950	12688	11216	14970	14030	14698	13944	14808	18168	15952	15238	15336	16612	16796	15462	544536	formate dehydrogenase major subunit [EC:1.17.1.9]	http://www.genome.jp/dbget-bin/www_bget?ko:K00123	16197.1	16081.3	15873.7	11543.7	15103	15899.3
K00001	12944	11412	14176	14772	15770	14706	14424	14944	14056	12610	9800	9908	17202	13520	10984	11682	10418	10884	10620	8846	11286	12334	8940	8358	17754	16710	17488	15194	15664	20432	15372	14144	13890	15670	17116	14658	488688	alcohol dehydrogenase [EC:1.1.1.1]	http://www.genome.jp/dbget-bin/www_bget?ko:K00001	14133.8	10772.7	12448.3	10064	17207	15141.7
K00058	16186	14148	17302	16944	19160	16258	17200	18442	16878	14236	11000	11398	19048	14234	11856	14126	14072	12924	11038	9506	11382	12550	9494	8534	16668	15984	16458	16978	16168	21738	15340	14276	14320	15470	16296	14924	532536	D-3-phosphoglycerate dehydrogenase / 2-oxoglutarate reductase [EC:1.1.1.95 1.1.1.399]	http://www.genome.jp/dbget-bin/www_bget?ko:K00058	16946.4	12211.3	14376.7	10417.3	17332.3	15104.3
K01007	12556	11506	15004	15752	16220	17216	15220	16416	14972	12956	11112	11360	19424	15950	13508	14074	15978	13374	13364	11630	12602	12864	10152	7624	20184	18084	18284	25952	19998	28814	14264	14052	13766	15616	16034	14820	550702	pyruvate, water dikinase [EC:2.7.9.2]	http://www.genome.jp/dbget-bin/www_bget?ko:K01007	14984.7	11809.3	15384.7	11372.7	21886	14758.7
K14083	11404	10868	13590	13664	13828	15806	11948	13606	12570	14140	12420	11756	15632	14564	10440	11814	9092	11676	13174	10918	13400	7742	9868	8628	14336	12794	13936	18314	12532	21950	12176	11986	11298	13472	13898	12490	461730	trimethylamine---corrinoid protein Co-methyltransferase [EC:2.1.1.250]	http://www.genome.jp/dbget-bin/www_bget?ko:K14083	13031.6	12772	12203	10621.7	15643.7	12553.3
K01595	7760	7000	8300	8224	9728	8444	8148	8454	8670	7578	6474	5820	11654	8888	7494	9128	9648	7036	7002	6296	7828	10396	7086	6126	11816	11388	11930	9586	12090	12884	12078	11250	11080	12398	13634	11220	334536	phosphoenolpyruvate carboxylase [EC:4.1.1.31]	http://www.genome.jp/dbget-bin/www_bget?ko:K01595	8303.11	6624	8974.67	7455.67	11615.7	11943.3
K00128	11730	10164	11894	10974	12936	10092	12168	11484	12270	8330	6584	6800	12238	9398	8008	9920	8622	9368	6554	5788	7350	10482	6774	6372	11214	11048	11602	9642	11730	13044	11308	10028	10572	11664	13930	10570	362652	aldehyde dehydrogenase (NAD+) [EC:1.2.1.3]	http://www.genome.jp/dbget-bin/www_bget?ko:K00128	11523.6	7238	9592.33	7220	11380	11345.3
K00799	17326	14932	16600	16450	20486	13396	17108	16838	15894	12404	8296	8576	15870	11118	9216	11124	10174	9660	8808	7586	8806	12596	10602	9366	10426	10376	10778	8194	11860	12434	10904	9744	10128	11144	13882	10526	433628	glutathione S-transferase [EC:2.5.1.18]	http://www.genome.jp/dbget-bin/www_bget?ko:K00799	16558.9	9758.67	11193.7	9627.33	10678	11054.7
K00248	8920	7514	9690	9974	10956	9476	10420	11080	9998	9078	6864	7348	10112	8292	6716	8256	9196	7454	7324	6156	7862	7938	5798	4924	10580	9946	10280	13452	10888	15754	10578	9860	9940	10894	12980	10254	336752	butyryl-CoA dehydrogenase [EC:1.3.8.1]	http://www.genome.jp/dbget-bin/www_bget?ko:K00248	9780.89	7763.33	8337.67	6667	11816.7	10751
K00600	8604	7882	9230	8890	10128	8984	9234	9932	9230	8122	6432	6692	11900	9392	7674	9800	9040	8070	6974	6082	6950	7420	6318	5408	10568	9694	9848	11336	10194	13252	10254	9878	9606	10876	12342	9960	326196	glycine hydroxymethyltransferase [EC:2.1.2.1]	http://www.genome.jp/dbget-bin/www_bget?ko:K00600	9123.78	7082	9312.67	6525.33	10815.3	10486
K01782	5568	4426	5298	5094	6168	4908	5518	5792	5310	5610	4420	4722	7062	5412	4822	5854	5554	5060	4974	4408	5748	7002	5248	4454	7254	6794	6962	6326	7516	8708	9332	8542	8800	9190	10756	8534	227146	3-hydroxyacyl-CoA dehydrogenase / enoyl-CoA hydratase / 3-hydroxybutyryl-CoA epimerase [EC:1.1.1.35 4.2.1.17 5.1.2.3]	http://www.genome.jp/dbget-bin/www_bget?ko:K01782	5342.44	4917.33	5627.33	5305.67	7260	9192.33
K01689	7704	6894	7926	7448	8764	7216	8136	8578	8222	7936	5866	6068	10226	7518	6350	7702	7634	6544	6112	5108	6122	7202	5774	5292	9252	8590	8930	10392	9746	12578	9248	8352	8354	9626	10124	8394	285928	enolase [EC:4.2.1.11]	http://www.genome.jp/dbget-bin/www_bget?ko:K01689	7876.44	6623.33	7662.33	5935	9914.67	9016.33
K00074	7452	6308	6958	7498	8400	7262	8184	8126	7590	7166	5024	5288	8036	5934	4862	6310	6194	5892	4496	4034	4978	5350	4712	3718	7052	6902	7306	8400	7656	10136	8634	7814	7908	9146	10004	7500	248230	3-hydroxybutyryl-CoA dehydrogenase [EC:1.1.1.157]	http://www.genome.jp/dbget-bin/www_bget?ko:K00074	7530.89	5826	6204.67	4548	7908.67	8501
K00320	11158	9904	11678	11012	12462	10296	12538	12518	11626	5086	4312	3772	10818	7798	6500	7088	4704	6260	5500	5324	6678	8048	5086	4618	11108	10650	11334	8008	11542	11914	7852	7212	7390	7662	8302	7578	305336	5,10-methylenetetrahydromethanopterin reductase [EC:1.5.98.2]	http://www.genome.jp/dbget-bin/www_bget?ko:K00320	11465.8	4390	7194.67	5875.67	10759.3	7666
K21071	7792	6798	8212	8022	9002	8248	8950	9554	8504	7860	6500	6512	9868	8000	6292	7452	7924	6142	5766	5066	6214	7216	5688	4582	9694	9238	9582	11578	9872	12224	7798	7232	7400	8108	7912	7464	284266	ATP-dependent phosphofructokinase / diphosphate-dependent phosphofructokinase [EC:2.7.1.11 2.7.1.90]	http://www.genome.jp/dbget-bin/www_bget?ko:K21071	8342.44	6957.33	7613	5755.33	10364.7	7652.33
K14731	4868	4346	5268	5494	5748	5388	5144	5514	5424	5212	4222	4264	7394	5842	4582	4736	4342	4232	3964	3634	4916	4934	3208	2696	7388	7232	7418	5664	6438	7720	7584	6952	6930	7458	8704	7114	201974	epsilon-lactone hydrolase [EC:3.1.1.83]	http://www.genome.jp/dbget-bin/www_bget?ko:K14731	5243.78	4566	5188	3892	6976.67	7457
K00632	7722	7184	8084	8386	9198	7602	8760	9200	8188	6800	5304	5482	8466	6918	5428	5858	5026	5986	4926	4240	5534	6216	4798	4224	7238	7138	7374	7788	7930	9538	7262	6694	7144	7686	8582	7114	251018	acetyl-CoA acyltransferase [EC:2.3.1.16]	http://www.genome.jp/dbget-bin/www_bget?ko:K00632	8258.22	5862	6280.33	4989.67	7834.33	7413.67
K01061	10350	8794	10148	10176	11650	9450	11106	11290	10224	8164	5690	6018	10208	7790	6458	6642	5916	6356	5842	4810	5932	7718	6548	5474	9346	9280	9590	7550	9098	10786	7078	6510	6678	7104	8292	6956	291022	carboxymethylenebutenolidase [EC:3.1.1.45]	http://www.genome.jp/dbget-bin/www_bget?ko:K01061	10354.2	6624	7228.33	6054	9275	7103
K03379	6648	5790	6988	6056	7242	5362	6410	6156	6686	3052	2404	2258	5608	4162	3438	3686	2654	3708	3810	3380	4196	4988	3200	2926	6468	6476	6770	4678	7406	6868	6552	6132	6336	6456	7902	6524	189376	cyclohexanone monooxygenase [EC:1.14.13.22]	http://www.genome.jp/dbget-bin/www_bget?ko:K03379	6370.89	2571.33	3876	3750	6444.33	6650.33
K01624	3318	2880	4156	3802	4310	4534	3810	4332	4548	4028	3360	3378	5920	4326	3906	4772	5376	3998	3684	3390	4092	4054	2892	2124	6968	6476	6936	6746	6370	8192	6682	6050	6058	7340	7454	6092	176354	fructose-bisphosphate aldolase, class II [EC:4.1.2.13]	http://www.genome.jp/dbget-bin/www_bget?ko:K01624	3965.56	3588.67	4716.33	3372.67	6948	6612.67
K01563	4456	3970	4500	4498	5012	4108	4578	4350	4144	4350	3256	3278	6234	4812	4100	4136	2988	3108	3870	3782	4618	6768	3712	3224	6366	5854	6252	5116	6762	7356	6728	6158	5920	6616	7002	5754	177736	haloalkane dehalogenase [EC:3.8.1.5]	http://www.genome.jp/dbget-bin/www_bget?ko:K01563	4401.78	3628	4229.67	4329	6284.33	6363
K01692	5724	5068	5748	5900	6510	5040	5700	6010	5764	3000	2394	2300	5248	4230	3568	3512	2464	3558	3294	3132	4106	4456	3150	2544	6566	6294	6486	5010	6728	7774	6058	5394	5582	6838	7836	5706	178692	enoyl-CoA hydratase [EC:4.2.1.17]	http://www.genome.jp/dbget-bin/www_bget?ko:K01692	5718.22	2564.67	3763.33	3447	6476.33	6235.67
K00831	4134	3612	4716	4218	4998	4358	4398	4800	4628	4768	3766	3824	5812	4188	3932	5104	5460	4150	3682	3190	3798	5046	3550	3038	6270	6310	6540	6548	7054	8208	6344	5612	5678	6206	7216	5816	180972	phosphoserine aminotransferase [EC:2.6.1.52]	http://www.genome.jp/dbget-bin/www_bget?ko:K00831	4429.11	4119.33	4774.33	3717.33	6821.67	6145.33
K00024	5428	4868	5380	5574	6414	5636	6674	6466	6180	5538	4176	4364	6746	4926	4314	5026	5176	4964	3662	3014	3810	4554	4034	3838	5788	5334	5872	5834	6020	7076	5814	5484	5480	6356	7120	5808	192748	malate dehydrogenase [EC:1.1.1.37]	http://www.genome.jp/dbget-bin/www_bget?ko:K00024	5846.67	4692.67	5192	3818.67	5987.33	6010.33
K13953	6394	5220	6188	6540	6978	5800	6918	7068	6326	4022	3130	3224	5148	4590	3822	3594	2786	3470	3658	3122	4138	4230	3248	2968	6420	6018	6238	6432	5984	8078	5748	5352	5228	6012	7030	5616	186738	alcohol dehydrogenase, propanol-preferring [EC:1.1.1.1]	http://www.genome.jp/dbget-bin/www_bget?ko:K13953	6381.33	3458.67	3901.67	3560.67	6528.33	5831
K00529	4376	4076	5058	4874	5466	4942	4898	5108	4982	3270	2702	2428	5728	3966	3094	4028	3486	3872	2666	2334	3232	3748	2332	2132	3860	3886	4124	3372	4080	4782	5334	4904	5278	6198	7040	5170	150826	3-phenylpropionate/trans-cinnamate dioxygenase ferredoxin reductase component [EC:1.18.1.3]	http://www.genome.jp/dbget-bin/www_bget?ko:K00529	4864.44	2800	4029	2740.67	4017.33	5654
K15022	6518	6036	7214	7534	8220	7786	7526	8428	7374	6952	5130	5450	7226	5538	4578	4792	4772	4530	5898	4510	5624	5232	5198	4456	6496	6218	6248	7954	7338	9328	5834	5734	5540	5652	5484	5574	223922	formate dehydrogenase (NADP+) beta subunit [EC:1.17.1.10]	http://www.genome.jp/dbget-bin/www_bget?ko:K15022	7404	5844	5239.33	5153	7263.67	5636.33
K13788	1354	1318	2042	1570	1880	2462	1600	1616	2284	1318	1196	1174	2284	1682	1532	1782	1844	1762	3138	3034	3476	4056	2334	1758	5386	5634	5608	4692	5574	6446	5308	4862	5040	5480	6868	5224	114618	phosphate acetyltransferase [EC:2.3.1.8]	http://www.genome.jp/dbget-bin/www_bget?ko:K13788	1791.78	1229.33	1814.33	2966	5556.67	5463.67
K07516	6166	5558	6854	6994	7412	6920	7432	7512	6900	7110	5454	5628	7986	6058	4950	6142	6258	5302	4818	4102	4828	5716	4310	4032	7252	6810	6926	7502	7036	9166	5502	5102	5074	5458	5928	5072	221270	3-hydroxyacyl-CoA dehydrogenase [EC:1.1.1.35]	http://www.genome.jp/dbget-bin/www_bget?ko:K07516	6860.89	6064	6116	4634.33	7448.67	5356
K01053	10872	8754	10160	9962	12596	8774	11188	11502	10500	5366	3776	4258	8940	6634	4786	5626	5204	4988	4020	3628	4370	5880	4358	4134	8254	7822	8286	8442	9164	10756	5562	5010	4946	5308	5978	5328	255132	gluconolactonase [EC:3.1.1.17]	http://www.genome.jp/dbget-bin/www_bget?ko:K01053	10478.7	4466.67	6029.67	4398.33	8787.33	5355.33
K08264	4430	3922	5064	5074	5044	6066	5230	5618	5086	4874	4060	4138	5264	4746	3660	4102	4112	4022	4886	4082	5090	3372	2732	2116	6938	6586	7012	10320	6488	10956	5290	5054	4774	5438	5674	5074	186394	heterodisulfide reductase subunit D [EC:1.8.98.1]	http://www.genome.jp/dbget-bin/www_bget?ko:K08264	5059.33	4357.33	4317.67	3713	8050	5217.33
K00129	850	892	1074	1142	1094	1266	1014	1066	1102	1340	810	1054	1190	1182	892	810	642	786	1466	1484	2192	2394	1104	974	1974	1980	1914	1354	1930	2032	5354	4900	4940	5348	5694	4732	69972	aldehyde dehydrogenase (NAD(P)+) [EC:1.2.1.5]	http://www.genome.jp/dbget-bin/www_bget?ko:K00129	1055.56	1068	917	1602.33	1864	5161.33
K00925	3330	2860	3622	3648	4202	4016	3678	3908	4060	2338	2128	1932	4964	3778	3094	4048	4384	3744	3106	2754	3318	3886	2462	1918	6106	5698	6094	6538	5758	8088	5120	4708	4558	5330	5848	4694	149718	acetate kinase [EC:2.7.2.1]	http://www.genome.jp/dbget-bin/www_bget?ko:K00925	3702.67	2132.67	4002	2907.33	6380.33	5043
K15633	4024	3642	4756	4636	4736	5134	4718	5274	4940	3632	3184	2812	5464	4630	3902	5068	5638	4276	4320	3800	4272	4664	3560	2890	8900	8552	8602	8782	8076	10396	4748	4316	4370	4848	5450	4566	185578	2,3-bisphosphoglycerate-independent phosphoglycerate mutase [EC:5.4.2.12]	http://www.genome.jp/dbget-bin/www_bget?ko:K15633	4651.11	3209.33	4829.67	3917.67	8884.67	4716.33
K00124	3888	3572	4330	4874	4832	5392	4858	5698	4678	4816	4032	4292	6236	4710	4180	5492	6388	4670	4060	3332	3662	3244	3200	2510	7556	6712	6938	11072	7476	11628	4820	4410	4308	4802	4850	4710	186228	formate dehydrogenase iron-sulfur subunit	http://www.genome.jp/dbget-bin/www_bget?ko:K00124	4680.22	4380	5279.33	3334.67	8563.67	4650
K00830	6680	5828	6734	6642	7782	6132	7012	7370	6486	4954	3882	4154	7132	5266	4310	5398	4618	4552	4222	3606	4444	5014	4396	3400	6460	6010	6404	5840	6250	7452	4530	4522	4106	4950	4878	4782	196198	alanine-glyoxylate transaminase / serine-glyoxylate transaminase / serine-pyruvate transaminase [EC:2.6.1.44 2.6.1.45 2.6.1.51]	http://www.genome.jp/dbget-bin/www_bget?ko:K00830	6740.67	4330	5212.67	4180.33	6402.67	4628
K00252	3280	3072	3164	3310	3742	2868	3546	3460	3410	4184	2904	3328	4568	3296	3140	3504	3454	2912	2756	2318	2850	3358	3410	3230	3278	2782	2916	3036	3310	4138	4794	4462	4330	4762	5188	4170	126230	glutaryl-CoA dehydrogenase [EC:1.3.8.6]	http://www.genome.jp/dbget-bin/www_bget?ko:K00252	3316.89	3472	3479	2987	3243.33	4617.67
K22083	4730	3720	4560	4476	5180	3992	4628	4386	4344	2834	2342	2116	4254	3372	2930	3380	2876	3322	4574	4098	5010	6130	5504	4910	5670	5548	6002	5172	6650	7112	4408	3786	4244	4394	5442	4396	160492	methylamine---glutamate N-methyltransferase subunit C [EC:2.1.1.21]	http://www.genome.jp/dbget-bin/www_bget?ko:K22083	4446.22	2430.67	3355.67	5037.67	6025.67	4445
K00121	6522	5844	6328	6392	6890	5418	6804	6360	6056	3350	2848	2810	6300	4540	4108	4392	3170	4462	3298	2700	3454	4356	4022	3714	4682	4560	4734	3712	5012	5240	4360	3832	4082	4450	5574	4292	168668	S-(hydroxymethyl)glutathione dehydrogenase / alcohol dehydrogenase [EC:1.1.1.284 1.1.1.1]	http://www.genome.jp/dbget-bin/www_bget?ko:K00121	6290.44	3002.67	4495.33	3590.67	4656.67	4431.67
K00850	2852	2512	3306	3508	3670	3950	3106	3640	3298	3034	2626	2694	4954	3914	3346	3694	4032	2790	3326	3012	3458	3564	2318	1702	5072	4474	4618	5576	4802	6474	4464	4096	4060	4640	5052	4162	135796	6-phosphofructokinase 1 [EC:2.7.1.11]	http://www.genome.jp/dbget-bin/www_bget?ko:K00850	3315.78	2784.67	3788.33	2896.67	5169.33	4412.33
K00127	4350	3968	4946	5254	5690	5406	5776	6348	5172	6522	4628	4732	6776	4872	4092	5334	5244	4076	3338	2572	3274	3136	3010	2468	5416	4968	5330	5640	5080	6908	4308	4162	4290	4534	4590	4368	170578	formate dehydrogenase subunit gamma	http://www.genome.jp/dbget-bin/www_bget?ko:K00127	5212.22	5294	5065.67	2966.33	5557	4375.33
K05714	4684	4122	4882	5122	5628	4816	4882	5264	4936	2412	1906	2026	4710	3494	2644	3178	2988	3004	2554	2486	2894	3926	2108	1928	4978	4798	4782	4110	4590	5608	4300	3790	4076	4358	5070	4080	141134	2-hydroxy-6-oxonona-2,4-dienedioate hydrolase [EC:3.7.1.14]	http://www.genome.jp/dbget-bin/www_bget?ko:K05714	4926.22	2114.67	3336.33	2649.33	4811	4279
K01834	2552	2344	2564	2736	3052	2620	2602	2968	2762	3246	2216	2394	3902	3020	2560	3012	3116	2522	2030	1728	2242	2754	1784	1512	3648	3324	3428	2930	3108	4140	4224	3844	3994	4356	4878	3890	108002	2,3-bisphosphoglycerate-dependent phosphoglycerate mutase [EC:5.4.2.11]	http://www.genome.jp/dbget-bin/www_bget?ko:K01834	2688.89	2618.67	3022	2008.33	3429.67	4197.67
K03389	3374	3266	3980	4174	4198	4878	3900	4394	3868	5126	3944	3996	5978	5108	3688	4092	4002	3586	3634	2844	3484	2676	2480	1832	5958	5908	5728	6276	4548	7470	4210	3978	3746	4494	4310	4092	153220	heterodisulfide reductase subunit B2 [EC:1.8.7.3 1.8.98.4 1.8.98.5 1.8.98.6]	http://www.genome.jp/dbget-bin/www_bget?ko:K03389	4003.56	4355.33	4409	2825	5981.33	4138.33
K11779	3128	2972	3200	2904	3456	2468	3444	3122	3010	2170	1478	1548	2472	2014	1756	1506	952	1772	1994	1784	2568	3108	1988	1610	3088	3116	3298	2124	3208	3252	3874	3622	3740	3976	4384	3576	97682	FO synthase [EC:2.5.1.147 4.3.1.32]	http://www.genome.jp/dbget-bin/www_bget?ko:K11779	3078.22	1732	1745.33	2175.33	3014.33	3862
K01560	5160	4506	4950	5204	5712	4138	5424	5764	5364	3798	2938	2882	4738	3476	2856	3072	2580	2768	2950	2380	2996	3624	3088	2778	4462	4096	4404	3558	4136	5246	3808	3466	3566	3884	4446	3426	141644	2-haloacid dehalogenase [EC:3.8.1.2]	http://www.genome.jp/dbget-bin/www_bget?ko:K01560	5135.78	3206	3248.33	2969.33	4317	3766
K11529	4094	3528	4352	4778	4908	4376	4680	4860	4398	3498	2806	3294	5536	4198	3590	3840	3736	3590	3490	2700	3136	3322	2830	2264	5202	5004	4838	6006	4580	6716	3740	3640	3630	3686	3926	3776	146548	glycerate 2-kinase [EC:2.7.1.165]	http://www.genome.jp/dbget-bin/www_bget?ko:K11529	4441.56	3199.33	4081.67	2957	5391	3733
K10215	2536	2232	2664	2208	2604	2084	2190	2202	2344	2232	1642	1622	2640	1896	1704	2026	1462	1926	2204	2142	2454	3586	1796	1768	3310	3334	3600	2264	3850	3346	3430	3026	3184	3860	5500	3316	94184	monooxygenase [EC:1.14.13.-]	http://www.genome.jp/dbget-bin/www_bget?ko:K10215	2340.44	1832	1942.33	2325	3284	3719.33
K01079	2220	1898	2202	2302	2548	2116	2156	2146	2188	1906	1430	1534	2954	2070	1754	2158	2266	1970	2142	1718	2016	2166	1558	1466	2858	2818	3060	2966	2712	3824	3530	3070	3168	3974	4842	3400	89106	phosphoserine phosphatase [EC:3.1.3.3]	http://www.genome.jp/dbget-bin/www_bget?ko:K01079	2197.33	1623.33	2195.33	1844.33	3039.67	3664
K00122	2354	2080	2520	2102	2534	1932	2404	2246	2236	1846	1420	1320	2402	1968	1854	2024	1708	1978	1516	1302	1954	2078	1422	1164	3204	3056	3244	2384	3160	3228	3830	3544	3608	3622	3752	3338	86334	formate dehydrogenase [EC:1.17.1.9]	http://www.genome.jp/dbget-bin/www_bget?ko:K00122	2267.56	1528.67	1989	1572.67	3046	3615.67
K07535	5638	5122	6014	5650	6716	5386	6224	6180	6100	2172	1490	1742	3976	3046	2372	2282	1544	2772	2088	1780	2500	2648	2022	1692	4858	4752	5024	3718	4560	5188	3446	3076	3282	3586	4028	3284	135958	2-hydroxycyclohexanecarboxyl-CoA dehydrogenase [EC:1.1.1.-]	http://www.genome.jp/dbget-bin/www_bget?ko:K07535	5892.22	1801.33	2665.33	2121.67	4683.33	3450.33
K00317	2252	1764	1862	1850	2096	1818	2142	2056	1926	2632	1654	1942	2616	1962	1630	1620	1220	1530	1040	888	1212	794	2174	1868	1304	1170	1232	820	1106	1164	3520	3110	3182	3772	4020	2964	69912	dimethylamine/trimethylamine dehydrogenase [EC:1.5.8.1 1.5.8.2]	http://www.genome.jp/dbget-bin/www_bget?ko:K00317	1974	2076	1763	1329.33	1132.67	3428
K05939	4408	3726	4226	4532	5820	4524	4588	5018	4992	3084	2960	2316	4794	3206	2880	3056	3194	2636	2520	2278	2758	3152	2730	2562	4978	4762	4782	3900	4456	4788	3522	3090	3156	3416	3982	3240	134032	acyl-[acyl-carrier-protein]-phospholipid O-acyltransferase / long-chain-fatty-acid--[acyl-carrier-protein] ligase [EC:2.3.1.40 6.2.1.20]	http://www.genome.jp/dbget-bin/www_bget?ko:K05939	4648.22	2786.67	3294.33	2666.67	4611	3401
K22516	4386	3962	5218	5560	5502	6346	4988	5028	4848	3484	2486	2832	4172	3750	2874	3476	3176	3610	5564	4502	4942	3470	3274	2394	7932	7306	7508	11172	7952	12874	3176	3184	3008	3506	3446	3380	174288	formate dehydrogenase (coenzyme F420) alpha subunit [EC:1.17.98.3 1.8.98.6]	http://www.genome.jp/dbget-bin/www_bget?ko:K22516	5093.11	2934	3509.67	4024.33	9124	3283.33
K01623	2468	2386	2368	2534	3098	2246	2984	2858	2866	2204	1562	1746	3166	2104	1862	2332	1972	1976	1606	1498	1814	2496	1850	1874	2480	2262	2362	1832	2372	2898	3460	2836	3144	3706	3492	2864	87578	fructose-bisphosphate aldolase, class I [EC:4.1.2.13]	http://www.genome.jp/dbget-bin/www_bget?ko:K01623	2645.33	1837.33	2235.33	1856.33	2367.67	3250.33
K03390	2244	2146	2870	3082	2892	3602	2562	3474	2834	3422	2804	2844	3802	3456	2734	2702	2548	2324	2924	2442	2762	1866	1978	1472	4876	4408	4586	5590	4378	6862	3122	3028	2920	3518	3236	3118	115428	heterodisulfide reductase subunit C2 [EC:1.8.7.3 1.8.98.4 1.8.98.5 1.8.98.6]	http://www.genome.jp/dbget-bin/www_bget?ko:K03390	2856.22	3023.33	2927.67	2240.67	5116.67	3157
K19793	2094	1878	2208	2092	2558	2114	2224	2254	2202	2246	1790	1686	2522	1610	1476	2024	1864	1726	1940	1762	2072	2362	1664	1266	3056	2954	3234	2598	2808	3452	3224	2934	2964	3268	3362	3086	84574	(5-formylfuran-3-yl)methyl phosphate transaminase [EC:2.6.1.108]	http://www.genome.jp/dbget-bin/www_bget?ko:K19793	2180.44	1907.33	1870.33	1844.33	3017	3139.67
K15634	2292	2204	2418	2502	2650	2444	2214	2528	2556	1644	1510	1268	3510	2598	2168	2240	1728	1836	1720	1628	1894	2328	1616	1346	3296	2984	3302	2862	3378	3818	3060	2818	2958	3188	3264	2848	88618	2,3-bisphosphoglycerate-dependent phosphoglycerate mutase [EC:5.4.2.11]	http://www.genome.jp/dbget-bin/www_bget?ko:K15634	2423.11	1474	2346.67	1755.33	3273.33	3022.67
K01607	7724	6612	7714	8058	8932	7370	8244	8528	7852	3098	2204	2386	3956	3154	2532	2802	2150	3606	3000	2878	3338	3184	3148	2542	9630	9166	9714	10232	8770	12210	3020	2814	2958	2986	3444	2790	192746	4-carboxymuconolactone decarboxylase [EC:4.1.1.44]	http://www.genome.jp/dbget-bin/www_bget?ko:K01607	7892.67	2562.67	3033.33	3015	9953.67	3002
K08691	2342	2090	2242	2268	2656	2126	2508	2362	2240	1006	1150	790	2384	1644	1230	1426	1246	1356	1600	1378	1672	1698	1580	1418	2300	2142	2338	1946	2326	2916	2992	2812	2818	3046	3274	2702	74024	malyl-CoA/(S)-citramalyl-CoA lyase [EC:4.1.3.24 4.1.3.25]	http://www.genome.jp/dbget-bin/www_bget?ko:K08691	2314.89	982	1547.67	1557.67	2328	2940.67
K05299	3298	2746	3702	3674	3528	4506	3620	4352	3468	2924	2644	2662	4132	3622	2850	3172	2894	2740	3264	2772	3218	2292	2050	1652	4160	4156	4238	4270	4082	5478	2848	2672	2732	2716	3024	2976	119134	formate dehydrogenase (NADP+) alpha subunit [EC:1.17.1.10]	http://www.genome.jp/dbget-bin/www_bget?ko:K05299	3654.89	2743.33	3235	2541.33	4397.33	2828
K06445	2518	2238	2572	2616	2930	2286	2454	2734	2518	3106	2308	2386	2598	2052	1826	2144	2508	1790	3130	2382	2936	3418	3058	2714	3268	3304	3200	2930	4030	3824	2918	2746	2808	2570	2826	2914	98560	acyl-CoA dehydrogenase [EC:1.3.99.-]	http://www.genome.jp/dbget-bin/www_bget?ko:K06445	2540.67	2600	2153	2939.67	3426	2797
K00198	2068	1898	2742	3184	2904	4022	2920	3568	2946	2576	2158	2394	3034	2992	2452	2668	2640	2742	3908	3286	3468	1762	2020	1422	4396	3872	4058	5208	4314	6062	2826	2564	2520	2876	2712	2818	110000	anaerobic carbon-monoxide dehydrogenase catalytic subunit [EC:1.2.7.4]	http://www.genome.jp/dbget-bin/www_bget?ko:K00198	2916.89	2376	2754.67	2644.33	4651.67	2719.33
K00255	1526	1488	1792	1590	1906	1542	1428	1452	1710	2044	1462	1542	2708	1616	1466	1958	1674	1592	1344	1192	1454	2216	1350	1104	2066	2058	2232	1422	2306	2232	2798	2484	2480	2618	3462	2308	67622	long-chain-acyl-CoA dehydrogenase [EC:1.3.8.8]	http://www.genome.jp/dbget-bin/www_bget?ko:K00255	1603.78	1682.67	1835.67	1443.33	2052.67	2691.67
K00169	2018	1656	1954	2114	1994	2128	2316	2564	2004	2400	1906	2150	1868	1588	1480	1912	1844	1690	2384	1984	2446	2056	1898	1610	3076	2860	3130	3886	3216	4270	2688	2722	2500	2760	2726	2606	84404	pyruvate ferredoxin oxidoreductase alpha subunit [EC:1.2.7.1]	http://www.genome.jp/dbget-bin/www_bget?ko:K00169	2083.11	2152	1730.33	2063	3406.33	2667
K05710	2312	1906	2288	2114	2494	1942	2462	2560	2260	1554	1174	1208	3162	2210	1900	2040	1682	1792	1084	992	1388	1510	984	1048	2420	2466	2368	1890	2254	2624	2718	2386	2414	2842	2966	2502	73916	3-phenylpropionate/trans-cinnamate dioxygenase ferredoxin component	http://www.genome.jp/dbget-bin/www_bget?ko:K05710	2259.78	1312	2131	1167.67	2337	2638
K11212	2446	2316	2580	2504	2446	2312	2458	2894	2474	1644	1262	1212	2760	2118	1852	2168	1614	1934	1528	1552	2116	2212	1356	1180	2738	2774	2814	2092	2606	3090	2616	2452	2404	2620	2884	2488	80516	LPPG:FO 2-phospho-L-lactate transferase [EC:2.7.8.28]	http://www.genome.jp/dbget-bin/www_bget?ko:K11212	2492.22	1372.67	2074.33	1657.33	2685.67	2577.33
K10216	1806	1414	1950	1938	1906	1912	1860	2078	2034	1142	832	804	2254	1426	1228	1742	1460	1456	1434	1276	1692	1930	1184	1064	2916	2846	2898	2528	2518	3354	2578	2312	2370	2726	3018	2282	70168	2-hydroxymuconate-semialdehyde hydrolase [EC:3.7.1.9]	http://www.genome.jp/dbget-bin/www_bget?ko:K10216	1877.56	926	1594.33	1430	2843.33	2547.67
K05921	1742	1450	1714	1732	2036	1704	1854	1764	1904	1034	746	746	1812	1324	1068	1076	708	1060	786	740	904	1124	914	694	1336	1366	1448	1226	1244	1476	2462	2124	2268	2590	2740	2096	53012	5-oxopent-3-ene-1,2,5-tricarboxylate decarboxylase / 2-hydroxyhepta-2,4-diene-1,7-dioate isomerase [EC:4.1.1.68 5.3.3.-]	http://www.genome.jp/dbget-bin/www_bget?ko:K05921	1766.67	842	1174.67	860.333	1349.33	2380
K09461	3024	2274	2766	2896	3330	2208	3166	3042	2824	2156	1546	1608	2922	2276	2014	2036	1744	1910	1002	920	1142	1416	1838	1708	1474	1350	1514	1220	1576	1718	2346	2068	2200	2292	2710	2100	74336	anthraniloyl-CoA monooxygenase [EC:1.14.13.40]	http://www.genome.jp/dbget-bin/www_bget?ko:K09461	2836.67	1770	2150.33	1337.67	1475.33	2286
K00496	822	744	912	766	988	874	738	778	954	1822	1184	1304	1552	1078	938	1904	2074	1378	1240	960	1320	2060	1220	954	1168	1048	1146	1012	1504	1460	2022	1736	2010	2368	2928	2134	49100	alkane 1-monooxygenase [EC:1.14.15.3]	http://www.genome.jp/dbget-bin/www_bget?ko:K00496	841.778	1436.67	1487.33	1292.33	1223	2199.67
K00170	1606	1226	1526	1572	1756	1598	1636	1828	1438	1862	1570	1468	1694	1402	1244	1500	1694	1368	1538	1314	1822	1346	1272	1004	2190	1970	2018	2030	1822	2520	2210	2298	2076	2468	2072	2032	61990	pyruvate ferredoxin oxidoreductase beta subunit [EC:1.2.7.1]	http://www.genome.jp/dbget-bin/www_bget?ko:K00170	1576.22	1633.33	1483.67	1382.67	2091.67	2192.67
K01026	2224	1854	2226	2154	2582	2130	2090	2224	2188	2158	1544	1716	2786	2124	1730	1610	1498	1420	1706	1566	1858	1700	2050	1744	2576	2656	2706	2240	2740	3108	2198	2122	2244	2256	2024	2208	75960	propionate CoA-transferase [EC:2.8.3.1]	http://www.genome.jp/dbget-bin/www_bget?ko:K01026	2185.78	1806	1861.33	1770.67	2671	2175.33
K05712	3866	3412	3518	3774	4478	2930	3772	3720	3636	1582	1280	1176	2922	2238	1698	1780	1530	1844	1066	894	1326	1742	980	976	1834	1796	1840	1402	1816	1826	2022	1842	1916	1970	3172	2054	79630	3-(3-hydroxy-phenyl)propionate hydroxylase [EC:1.14.13.127]	http://www.genome.jp/dbget-bin/www_bget?ko:K05712	3678.44	1346	2002	1164	1752.33	2162.67
K01501	2092	2016	2260	2262	2758	2224	2650	2744	2422	2904	1952	2372	2212	1616	1282	1362	1482	1546	2192	2038	2224	2552	1810	1320	3400	3306	3574	3208	3334	3842	2324	2098	2092	1972	2130	2060	83632	nitrilase [EC:3.5.5.1]	http://www.genome.jp/dbget-bin/www_bget?ko:K01501	2380.89	2409.33	1583.33	2022.67	3444	2112.67
K11645	2150	1694	1890	2102	2526	1954	2178	2260	2228	1812	1510	1756	2204	1960	1554	1794	1764	1738	1554	1348	1812	1782	1474	1186	2800	2620	2566	2706	2474	3448	2138	2074	1934	2226	2082	2050	73348	fructose-bisphosphate aldolase, class I [EC:4.1.2.13]	http://www.genome.jp/dbget-bin/www_bget?ko:K11645	2109.11	1692.67	1835.67	1526	2769	2084
K22515	2258	2010	2294	2270	2764	2010	2364	2484	2272	2218	1682	1586	1850	1288	1138	1508	1278	1298	1362	1120	1486	1458	1906	1520	1770	1640	1718	1478	1798	2048	2178	1840	1890	2168	2188	1890	66030	formate dehydrogenase beta subunit [EC:1.17.1.9]	http://www.genome.jp/dbget-bin/www_bget?ko:K22515	2302.89	1828.67	1393.33	1475.33	1742	2025.67
K14127	1360	1268	2042	2194	2056	2788	1984	2506	1940	1798	1686	1738	2192	1934	1600	1548	1400	1562	2668	2180	2474	1026	1226	718	4516	3544	3458	6402	3762	7292	1932	2020	1820	2138	2078	2162	85012	F420-non-reducing hydrogenase iron-sulfur subunit [EC:1.12.99.- 1.8.98.5 1.8.98.6]	http://www.genome.jp/dbget-bin/www_bget?ko:K14127	2015.33	1740.67	1706	1715.33	4829	2025
K01039	3364	3106	3856	3904	4070	4030	4454	4994	3844	2434	1958	2120	3410	3042	2098	2352	1748	2434	1562	1318	1676	1016	1090	924	2662	2414	2540	2296	2080	3296	1964	2044	1748	2004	2176	2126	92154	glutaconate CoA-transferase, subunit A [EC:2.8.3.12]	http://www.genome.jp/dbget-bin/www_bget?ko:K01039	3958	2170.67	2514	1264.33	2548	2010.33
K07823	1812	1678	1794	1906	2120	2042	2228	2110	2024	2520	1772	1904	3016	2500	1996	2362	2382	2080	990	814	1028	1504	1236	1226	1836	1510	1650	1618	1762	1986	1738	1474	1806	1896	3196	1868	67384	3-oxoadipyl-CoA thiolase [EC:2.3.1.174]	http://www.genome.jp/dbget-bin/www_bget?ko:K07823	1968.22	2065.33	2389.33	1133	1727	1996.33
K01825	872	728	902	878	1224	826	814	914	870	1470	1198	1120	2192	1246	1072	1590	1368	924	898	700	1002	1286	1014	958	1160	986	1174	900	1166	1170	1678	1496	1800	2006	2850	1920	44372	3-hydroxyacyl-CoA dehydrogenase / enoyl-CoA hydratase / 3-hydroxybutyryl-CoA epimerase / enoyl-CoA isomerase [EC:1.1.1.35 4.2.1.17 5.1.2.3 5.3.3.8]	http://www.genome.jp/dbget-bin/www_bget?ko:K01825	892	1262.67	1398.67	976.333	1092.67	1958.33
K00451	1858	1574	1832	1784	2268	1682	1894	1930	1884	2258	1402	1562	3554	2516	2128	2410	2874	2090	1078	940	1158	1796	1480	1388	1356	1258	1388	1344	1656	1902	2062	1934	1942	1902	1914	1838	65836	homogentisate 1,2-dioxygenase [EC:1.13.11.5]	http://www.genome.jp/dbget-bin/www_bget?ko:K00451	1856.22	1740.67	2595.33	1306.67	1484	1932
K10218	3514	3186	3552	3684	4112	3550	3954	3932	3718	1788	1400	1608	3054	2180	1692	1690	1344	2116	1650	1562	1860	1756	1610	1316	2788	2664	3014	2422	2704	3302	1966	1858	1820	1814	2010	1924	88114	4-hydroxy-4-methyl-2-oxoglutarate aldolase [EC:4.1.3.17]	http://www.genome.jp/dbget-bin/www_bget?ko:K10218	3689.11	1598.67	2012.67	1625.67	2815.67	1898.67
K15635	2388	1892	2390	2554	2532	2514	2592	2890	2344	1760	1510	1448	3186	2724	2196	2594	2940	2374	2018	1622	1978	1476	1434	1410	2632	2240	2304	4258	2604	4398	1946	1782	1710	1830	1912	1900	82282	2,3-bisphosphoglycerate-independent phosphoglycerate mutase [EC:5.4.2.12]	http://www.genome.jp/dbget-bin/www_bget?ko:K15635	2455.11	1572.67	2669	1656.33	3072.67	1846.67
K24998	560	454	632	652	680	622	660	626	602	622	452	486	918	744	658	584	492	412	588	602	926	1218	456	360	1168	1136	1212	944	1108	1268	1904	1656	1620	2042	2082	1738	32884	dehydro coenzyme F420 reductase / coenzyme F420-0:L-glutamate ligase / coenzyme F420-1:gamma-L-glutamate ligase [EC:1.3.8.17 6.3.2.31 6.3.2.34]	http://www.genome.jp/dbget-bin/www_bget?ko:K24998	609.778	520	634.667	691.667	1139.33	1840.33
K00441	1480	1232	1456	1558	1668	1472	1476	1550	1620	1332	1068	1086	2064	1422	1420	1430	1432	1308	1664	1236	1740	1986	1326	1256	2008	1984	1994	2124	2252	2606	1746	1636	1764	1932	1976	1712	59016	coenzyme F420 hydrogenase subunit beta [EC:1.12.98.1]	http://www.genome.jp/dbget-bin/www_bget?ko:K00441	1501.33	1162	1512.67	1534.67	2161.33	1794.33
K02446	1968	1478	1844	1772	1858	1778	1988	1856	1706	1194	962	774	2156	1602	1416	1330	1074	1372	1156	1136	1272	1252	1014	848	1804	1746	1888	1282	1674	1880	1730	1550	1484	1806	2108	1600	55358	fructose-1,6-bisphosphatase II [EC:3.1.3.11]	http://www.genome.jp/dbget-bin/www_bget?ko:K02446	1805.33	976.667	1491.67	1113	1712.33	1713
K08726	1262	1072	1252	1306	1458	1044	1126	1176	1126	1090	844	798	1410	1062	880	1194	1046	902	1150	962	1340	2092	1164	1114	1934	1788	1894	1350	2114	2050	1548	1602	1660	1608	2018	1548	48984	soluble epoxide hydrolase / lipid-phosphate phosphatase [EC:3.3.2.10 3.1.3.76]	http://www.genome.jp/dbget-bin/www_bget?ko:K08726	1202.44	910.667	1082.33	1303.67	1855	1664
K14941	1346	1226	1414	1270	1392	1208	1264	1528	1330	672	552	552	1904	1286	1040	1398	1182	1166	922	836	1158	1312	734	794	1748	1680	1702	1390	1438	1956	1832	1462	1508	1706	1916	1528	47352	2-phospho-L-lactate/phosphoenolpyruvate guanylyltransferase [EC:2.7.7.68 2.7.7.105]	http://www.genome.jp/dbget-bin/www_bget?ko:K14941	1330.89	592	1329.33	959.333	1652.33	1658.67
K07104	2564	2172	2834	2888	3280	2646	2854	3006	2896	1530	856	1006	2644	2100	1572	1836	1472	1736	1052	844	1222	988	902	748	2066	1816	1908	1600	1712	2246	1536	1594	1534	1682	1978	1598	66918	catechol 2,3-dioxygenase [EC:1.13.11.2]	http://www.genome.jp/dbget-bin/www_bget?ko:K07104	2793.33	1130.67	1893.33	959.333	1891.33	1653.67
K00197	1698	1684	2504	2676	2512	3306	2220	2664	2224	1996	1600	1862	2050	1938	1352	1468	1266	1788	2412	2052	2058	1256	1150	926	3152	3016	2936	4066	2804	4792	1410	1616	1462	1642	1540	1790	76888	acetyl-CoA decarbonylase/synthase, CODH/ACS complex subunit gamma [EC:2.1.1.245]	http://www.genome.jp/dbget-bin/www_bget?ko:K00197	2387.56	1819.33	1643.67	1642.33	3461	1576.67
K14126	892	980	1268	1406	1360	1822	1454	1750	1390	1198	974	1002	1706	1596	1140	1234	1326	1274	1154	1038	1304	936	518	562	1864	1818	1934	2808	1766	2788	1442	1574	1384	1756	1728	1564	51710	F420-non-reducing hydrogenase large subunit [EC:1.12.99.- 1.8.98.5]	http://www.genome.jp/dbget-bin/www_bget?ko:K14126	1369.11	1058	1379.33	918.667	2163	1574.67
K03841	1818	1468	1882	1982	2210	2094	1568	1998	2034	1754	1422	1416	2682	2176	1730	2454	2884	1854	1118	1010	1322	1266	1142	858	2306	1982	1990	2158	1818	2608	1414	1380	1340	1588	2206	1392	64324	fructose-1,6-bisphosphatase I [EC:3.1.3.11]	http://www.genome.jp/dbget-bin/www_bget?ko:K03841	1894.89	1530.67	2296.67	1119.33	2143.67	1553.33
K00018	1120	908	1054	1074	1376	1044	1138	1164	1192	1418	1246	1082	1654	1114	1008	1326	1346	944	1310	1096	1224	1660	1278	1074	2268	2046	2062	1582	1946	2158	1666	1454	1432	1594	1614	1482	50154	glycerate dehydrogenase [EC:1.1.1.29]	http://www.genome.jp/dbget-bin/www_bget?ko:K00018	1118.89	1248.67	1232	1273.67	2010.33	1540.33
K00172	894	868	920	1156	1098	1092	1258	1372	1124	1318	1162	1188	952	1032	874	946	932	1054	1534	1200	1400	1160	1126	796	1644	1448	1734	1562	1414	2152	1620	1520	1428	1544	1568	1498	45588	pyruvate ferredoxin oxidoreductase gamma subunit [EC:1.2.7.1]	http://www.genome.jp/dbget-bin/www_bget?ko:K00172	1086.89	1222.67	965	1202.67	1659	1529.67
K03186	1774	1538	1870	2066	2200	1900	1862	2230	1784	1530	1284	1424	1982	1544	1300	1542	1610	1322	1692	1184	1474	1138	1114	928	2282	2258	2244	2354	1916	2884	1526	1656	1520	1486	1440	1540	61398	flavin prenyltransferase [EC:2.5.1.129]	http://www.genome.jp/dbget-bin/www_bget?ko:K03186	1913.78	1412.67	1550	1255	2323	1528
K01040	2896	2560	3192	3432	3620	3438	3698	4056	3330	1974	1528	1616	2968	2504	1762	1692	1654	2058	1242	1014	1312	762	884	682	2010	1936	1896	1656	1704	2654	1594	1494	1482	1582	1562	1432	74876	glutaconate CoA-transferase, subunit B [EC:2.8.3.12]	http://www.genome.jp/dbget-bin/www_bget?ko:K01040	3358	1706	2106.33	982.667	1976	1524.33
K01561	2700	2166	2560	2558	2960	1996	2628	2606	2456	1408	980	1056	2474	1804	1238	1328	1146	1214	1440	1306	1508	2002	1464	1096	1906	1724	1808	1660	1946	2168	1636	1394	1548	1512	1564	1478	64438	haloacetate dehalogenase [EC:3.8.1.3]	http://www.genome.jp/dbget-bin/www_bget?ko:K01561	2514.44	1148	1534	1469.33	1868.67	1522
K00449	2702	2290	2568	2634	2964	2398	2710	2844	2710	1454	916	1164	2608	1970	1492	1822	1670	1368	1058	928	1142	1470	1060	996	2040	2116	2098	1450	1686	2158	1418	1332	1322	1546	1796	1476	65376	protocatechuate 3,4-dioxygenase, beta subunit [EC:1.13.11.3]	http://www.genome.jp/dbget-bin/www_bget?ko:K00449	2646.67	1178	1821.67	1109	1924.67	1481.67
K00625	1684	1394	1602	1660	2116	1562	1688	1746	1678	1842	1290	1266	2652	1764	1524	1648	1924	1344	928	624	770	730	1062	792	2256	1976	2014	2592	2034	3066	1480	1292	1400	1610	1652	1358	58020	phosphate acetyltransferase [EC:2.3.1.8]	http://www.genome.jp/dbget-bin/www_bget?ko:K00625	1681.11	1466	1809.33	817.667	2323	1465.33
K16050	1314	1232	1342	1452	1518	1388	1248	1354	1292	746	436	506	1156	954	688	754	760	668	788	686	942	1302	650	630	1500	1434	1344	1272	1396	1608	1582	1252	1360	1524	1624	1388	41090	4,5:9,10-diseco-3-hydroxy-5,9,17-trioxoandrosta-1(10),2-diene-4-oate hydrolase [EC:3.7.1.17]	http://www.genome.jp/dbget-bin/www_bget?ko:K16050	1348.89	562.667	830	833	1425.67	1455
K14128	1084	1016	1364	1404	1394	1728	1398	1634	1378	986	988	918	1854	1562	1216	1432	1210	1140	1064	962	1228	934	530	480	2050	1832	1800	2854	1878	3060	1420	1434	1278	1402	1486	1394	50792	F420-non-reducing hydrogenase small subunit [EC:1.12.99.- 1.8.98.5]	http://www.genome.jp/dbget-bin/www_bget?ko:K14128	1377.78	964	1402.33	866.333	2245.67	1402.33
K16370	1082	906	1160	1132	1204	1160	1186	1154	1246	578	438	466	2098	1580	1406	1280	1302	986	742	704	894	952	572	464	1536	1622	1540	1328	1284	1720	1360	1290	1296	1526	1478	1376	42048	6-phosphofructokinase 2 [EC:2.7.1.11]	http://www.genome.jp/dbget-bin/www_bget?ko:K16370	1136.67	494	1442	721.333	1505	1387.67
K02554	1794	1462	1798	1738	2048	1412	1652	1622	1766	1382	956	878	1528	1098	834	898	748	990	900	726	926	1220	980	848	1402	1508	1490	940	1474	1580	1180	1082	1194	1412	2004	1342	46812	2-keto-4-pentenoate hydratase [EC:4.2.1.80]	http://www.genome.jp/dbget-bin/www_bget?ko:K02554	1699.11	1072	1016	933.333	1399	1369
K22086	1702	1272	1512	1514	1740	1114	1388	1176	1464	1602	986	1154	2022	1344	1174	1278	1214	1238	1048	918	1176	1358	1358	1116	1214	1174	1186	1046	1448	1498	1300	1168	1294	1474	1748	1192	47610	methylglutamate dehydrogenase subunit C [EC:1.5.99.5]	http://www.genome.jp/dbget-bin/www_bget?ko:K22086	1431.33	1247.33	1378.33	1162.33	1261	1362.67
K05979	934	936	1138	1128	1054	1202	1014	1118	998	892	676	664	1728	1296	1096	1204	1174	940	944	774	858	912	712	420	1260	1078	1146	2002	1370	2132	1398	1248	1324	1518	1500	1176	40964	2-phosphosulfolactate phosphatase [EC:3.1.3.71]	http://www.genome.jp/dbget-bin/www_bget?ko:K05979	1058	744	1239.67	770	1498	1360.67
K07812	1788	1540	2398	2974	2622	4122	2948	4004	3168	1094	1156	984	2040	1324	916	1972	1670	1866	498	370	456	388	300	256	2198	2702	3024	2058	1414	2408	1358	1344	1182	1374	1404	1250	62570	trimethylamine-N-oxide reductase (cytochrome c) [EC:1.7.2.3]	http://www.genome.jp/dbget-bin/www_bget?ko:K07812	2840.44	1078	1631.33	378	2300.67	1318.67
K00114	4828	4064	3974	4338	5442	2956	5072	4750	4064	1980	1490	1610	2928	2304	1618	2010	1472	2096	1050	898	1104	1496	2156	1710	1296	1412	1314	1228	1586	1532	1214	1042	1236	1356	1590	1436	81652	alcohol dehydrogenase (cytochrome c) [EC:1.1.2.8]	http://www.genome.jp/dbget-bin/www_bget?ko:K00114	4387.56	1693.33	2071.33	1402.33	1394.67	1312.33
K22305	1256	1110	1390	1404	1488	1626	1610	1792	1444	978	758	868	1658	1216	970	1120	1064	1066	970	940	1176	758	658	510	1534	1360	1396	1502	1118	1846	1212	1156	1214	1314	1362	1294	44138	phosphoserine phosphatase [EC:3.1.3.3]	http://www.genome.jp/dbget-bin/www_bget?ko:K22305	1457.78	868	1182.33	835.333	1459.33	1258.67
K00125	536	558	898	974	928	1230	728	980	748	1322	976	1326	1102	1412	970	1068	954	1124	2152	1630	1568	540	750	430	2466	1964	2186	3198	2072	3856	1262	1140	1054	1290	1248	1204	47844	formate dehydrogenase (coenzyme F420) beta subunit [EC:1.17.98.3 1.8.98.6]	http://www.genome.jp/dbget-bin/www_bget?ko:K00125	842.222	1208	1105	1178.33	2623.67	1199.67
K01555	940	786	956	906	1172	1000	1160	1038	1014	1042	702	1002	1610	1170	896	1498	1886	1036	626	550	540	1042	700	668	868	690	784	710	1102	1154	994	1016	1020	1214	1806	1138	36436	fumarylacetoacetase [EC:3.7.1.2]	http://www.genome.jp/dbget-bin/www_bget?ko:K01555	996.889	915.333	1349.33	687.667	884.667	1198
K12234	1884	1492	1802	1732	2140	1742	1758	1780	1780	880	724	704	2084	1534	1174	1718	1328	1574	826	860	1054	1030	840	1030	1640	1666	1694	1546	1492	2076	1190	1168	1192	1200	1222	1112	50668	coenzyme F420-0:L-glutamate ligase / coenzyme F420-1:gamma-L-glutamate ligase [EC:6.3.2.31 6.3.2.34]	http://www.genome.jp/dbget-bin/www_bget?ko:K12234	1790	769.333	1568.67	940	1685.67	1180.67
K01512	1180	926	1114	1066	1192	1112	1230	1174	1188	896	714	750	1418	1148	862	1028	1112	944	840	658	856	966	772	590	1530	1338	1348	1510	1418	2046	1254	1070	1026	1150	1410	1150	39986	acylphosphatase [EC:3.6.1.7]	http://www.genome.jp/dbget-bin/www_bget?ko:K01512	1131.33	786.667	1085.33	780.333	1531.67	1176.67
K00196	830	758	1072	1080	1104	1158	1068	1088	1046	1196	1024	1120	1084	960	842	1062	1100	844	1666	1192	1468	810	1024	896	1802	1660	1646	3156	1798	3574	1178	1158	1014	1258	1138	1304	46178	anaerobic carbon-monoxide dehydrogenase iron sulfur subunit	http://www.genome.jp/dbget-bin/www_bget?ko:K00196	1022.67	1113.33	982	1176	2272.67	1175
K04118	1080	1076	1170	1062	1264	968	1288	1374	1242	996	712	698	942	722	676	876	700	772	670	608	828	838	636	544	1012	974	1030	740	1148	1140	1188	1076	1128	1202	1338	1068	34786	pimeloyl-CoA dehydrogenase [EC:1.3.1.62]	http://www.genome.jp/dbget-bin/www_bget?ko:K04118	1169.33	802	781.333	687.333	1007.33	1166.67
K16171	1448	1250	1370	1486	1702	1224	1464	1558	1584	1876	1246	1368	1980	1516	1018	1508	1372	1166	874	652	880	1246	968	908	1160	1198	1130	1078	1406	1466	1346	1126	1140	1136	1088	1122	46060	fumarylacetoacetate (FAA) hydrolase [EC:3.7.1.2]	http://www.genome.jp/dbget-bin/www_bget?ko:K16171	1454	1496.67	1426.67	921.333	1239.67	1159.67
K07546	2582	2296	2484	2378	2836	1948	2558	2642	2580	552	506	486	1106	930	716	656	280	1212	694	698	924	1096	672	576	1712	1704	1650	1322	1596	1790	1224	1142	1048	1118	1270	1092	50076	(E)-benzylidenesuccinyl-CoA hydratase [EC:4.2.1.180]	http://www.genome.jp/dbget-bin/www_bget?ko:K07546	2478.22	514.667	816.667	776.667	1629	1149
K01622	614	572	714	700	782	758	1006	988	674	698	552	646	686	576	426	350	240	384	484	442	542	406	378	410	608	536	466	414	408	598	1236	1058	974	1244	1256	1014	23840	fructose 1,6-bisphosphate aldolase/phosphatase [EC:4.1.2.13 3.1.3.11]	http://www.genome.jp/dbget-bin/www_bget?ko:K01622	756.444	632	443.667	443.667	505	1130.33
K20509	1044	970	1330	1336	1296	1540	1142	1368	1300	1514	1596	1200	2014	1728	1280	1976	2570	1574	1026	816	918	944	842	806	2448	2274	2364	3036	2144	3644	1126	1094	1064	1162	1086	1180	54752	carboxybiotin decarboxylase [EC:7.2.4.1]	http://www.genome.jp/dbget-bin/www_bget?ko:K20509	1258.44	1436.67	1857	892	2651.67	1118.67
K01070	752	666	710	816	950	758	654	740	800	868	756	722	1212	776	706	994	1034	676	986	800	896	1364	1064	974	1114	1042	1206	916	1252	1312	1022	886	1104	1074	1468	1022	34092	S-formylglutathione hydrolase [EC:3.1.2.12]	http://www.genome.jp/dbget-bin/www_bget?ko:K01070	760.667	782	899.667	1014	1140.33	1096
K00446	2484	2146	2480	2592	3178	2466	3120	2948	2748	618	562	532	1644	1160	934	1070	608	1190	306	254	296	504	378	304	1382	1550	1696	802	1018	1170	1146	912	988	1196	1272	908	48562	catechol 2,3-dioxygenase [EC:1.13.11.2]	http://www.genome.jp/dbget-bin/www_bget?ko:K00446	2684.67	570.667	1101	340.333	1269.67	1070.33
K13238	848	866	958	1032	1206	930	1012	1090	1034	408	374	390	780	682	586	522	582	592	980	710	892	834	722	560	1354	1240	1280	1734	1566	2022	1170	1082	1070	1068	1086	942	34204	Delta3-Delta2-enoyl-CoA isomerase [EC:5.3.3.8]	http://www.genome.jp/dbget-bin/www_bget?ko:K13238	997.333	390.667	624	783	1532.67	1069.67
K15512	1294	1202	1352	1202	1464	978	1496	1560	1384	1684	1038	1158	1290	1124	1196	1000	752	1026	580	488	694	652	1218	1070	714	730	806	522	880	772	1096	1006	1010	1112	1092	1010	37652	benzoyl-CoA 2,3-epoxidase subunit B [EC:1.14.13.208]	http://www.genome.jp/dbget-bin/www_bget?ko:K15512	1325.78	1293.33	1064.67	783.667	737.333	1054.33
K13954	596	486	638	618	658	796	596	628	602	816	584	506	1370	1016	826	830	994	590	786	692	1044	662	552	552	1310	1196	1382	1474	1392	1724	1042	1018	1044	1056	1140	1014	32230	alcohol dehydrogenase [EC:1.1.1.1]	http://www.genome.jp/dbget-bin/www_bget?ko:K13954	624.222	635.333	937.667	714.667	1413	1052.33
K10217	458	400	428	480	676	488	530	452	534	498	288	378	910	684	552	1002	1176	704	466	432	494	554	526	420	756	772	774	464	960	696	1058	992	1028	1042	1124	906	24102	aminomuconate-semialdehyde/2-hydroxymuconate-6-semialdehyde dehydrogenase [EC:1.2.1.32 1.2.1.85]	http://www.genome.jp/dbget-bin/www_bget?ko:K10217	494	388	838	482	737	1025
K00194	778	752	1074	1254	1136	1470	1066	1370	1190	1118	882	1000	1292	1140	846	1070	946	888	1188	922	1146	646	596	412	1672	1630	1610	2058	1364	2470	980	1026	900	1032	1002	1106	41032	acetyl-CoA decarbonylase/synthase, CODH/ACS complex subunit delta [EC:2.1.1.245]	http://www.genome.jp/dbget-bin/www_bget?ko:K00194	1121.11	1000	1030.33	818.333	1800.67	1007.67
K00079	884	786	1068	1136	1338	1026	1014	1152	1074	574	496	406	952	838	686	672	634	678	998	738	920	876	558	480	1272	1256	1276	1106	1162	1482	986	986	996	1000	1032	972	33510	carbonyl reductase 1 [EC:1.1.1.184 1.1.1.189 1.1.1.197]	http://www.genome.jp/dbget-bin/www_bget?ko:K00079	1053.11	492	743.333	761.667	1259	995.333
K05884	2078	1824	2074	2036	2210	1640	2190	2044	1742	1094	920	848	1612	1322	1058	1202	1068	1080	1504	1338	1526	1896	922	790	1718	1540	1668	2122	1858	2526	976	852	814	1040	928	1024	53084	L-2-hydroxycarboxylate dehydrogenase (NAD+) [EC:1.1.1.337]	http://www.genome.jp/dbget-bin/www_bget?ko:K05884	1982	954	1223.67	1329.33	1905.33	939
K22084	1000	784	946	884	1222	774	868	896	900	836	620	604	1258	790	686	802	674	612	624	540	590	850	810	746	764	702	776	646	838	928	894	862	794	1060	1114	894	29588	methylglutamate dehydrogenase subunit A [EC:1.5.99.5]	http://www.genome.jp/dbget-bin/www_bget?ko:K22084	919.333	686.667	803.667	693.333	775.667	936.333
K04072	832	866	1030	824	828	1048	794	838	1064	262	384	338	860	538	480	530	400	626	448	374	428	580	296	256	666	484	470	496	592	662	804	712	754	984	1288	866	23702	acetaldehyde dehydrogenase / alcohol dehydrogenase [EC:1.2.1.10 1.1.1.1]	http://www.genome.jp/dbget-bin/www_bget?ko:K04072	902.667	328	572.333	397	561.667	901.333
K11261	770	872	1262	1414	1168	1852	928	1348	1096	564	486	538	1052	956	618	980	1022	874	1540	1252	1270	572	692	448	2184	1664	1822	3808	2306	4120	916	872	782	930	940	928	44846	formylmethanofuran dehydrogenase subunit E [EC:1.2.7.12]	http://www.genome.jp/dbget-bin/www_bget?ko:K11261	1190	529.333	917	962.333	2650.67	894.667
K22270	1508	1248	1446	1514	1968	1208	1804	1648	1356	732	650	518	1162	852	788	854	718	878	534	494	570	700	580	512	758	702	660	634	816	866	836	654	706	1070	1172	850	33966	3-hydroxybenzoate 6-monooxygenase [EC:1.14.13.24]	http://www.genome.jp/dbget-bin/www_bget?ko:K22270	1522.22	633.333	875.333	565	739.333	881.333
K00078	662	652	808	758	836	940	714	788	1014	632	604	510	906	610	570	960	772	774	652	592	686	1084	588	438	1074	1012	1076	1096	1156	1414	906	740	774	984	1090	788	29660	dihydrodiol dehydrogenase / D-xylose 1-dehydrogenase (NADP) [EC:1.3.1.20 1.1.1.179]	http://www.genome.jp/dbget-bin/www_bget?ko:K00078	796.889	582	765.333	673.333	1138	880.333
K14727	1060	810	1136	1100	1134	942	1026	1152	956	1018	616	738	1654	990	864	796	592	720	426	424	574	874	602	580	902	908	962	682	890	1070	900	864	744	1000	936	726	31368	3-oxoadipate enol-lactonase / 4-carboxymuconolactone decarboxylase [EC:3.1.1.24 4.1.1.44]	http://www.genome.jp/dbget-bin/www_bget?ko:K14727	1035.11	790.667	936	580	902.333	861.667
K06912	2540	2268	2608	2374	2882	1966	2146	2278	2388	934	416	718	920	764	650	590	310	932	1018	986	1012	1426	1048	1044	1876	1956	2056	1316	1760	1974	890	826	846	820	924	844	50306	alpha-ketoglutarate-dependent 2,4-dichlorophenoxyacetate dioxygenase [EC:1.14.11.-]	http://www.genome.jp/dbget-bin/www_bget?ko:K06912	2383.33	689.333	694.333	1089	1823	858.333
K04105	914	730	864	802	1148	662	1026	1028	910	500	420	430	706	566	536	540	480	630	626	614	668	736	688	650	708	664	808	600	818	918	858	780	836	926	912	758	26460	4-hydroxybenzoate-CoA ligase [EC:6.2.1.27 6.2.1.25]	http://www.genome.jp/dbget-bin/www_bget?ko:K04105	898.222	450	576.333	663.667	752.667	845
K16173	1342	1156	1482	1424	1574	1612	1556	1734	1472	1240	856	1020	1500	1256	892	1032	884	1024	694	644	708	382	498	370	1206	1106	1000	1906	1134	2086	738	828	774	930	846	908	39814	glutaryl-CoA dehydrogenase (non-decarboxylating) [EC:1.3.99.32]	http://www.genome.jp/dbget-bin/www_bget?ko:K16173	1483.56	1038.67	1098	549.333	1406.33	837.333
K01857	2124	1898	2158	2152	2182	1972	2308	2312	2218	558	400	432	1264	924	670	662	458	836	480	464	540	832	558	660	698	586	688	508	838	898	746	636	694	830	1248	798	38230	3-carboxy-cis,cis-muconate cycloisomerase [EC:5.5.1.2]	http://www.genome.jp/dbget-bin/www_bget?ko:K01857	2147.11	463.333	802.333	589	702.667	825.333
K01666	504	464	582	550	562	672	566	598	762	352	430	258	794	512	468	566	422	628	262	306	414	232	234	162	972	934	992	754	878	902	788	702	708	864	910	838	21542	4-hydroxy 2-oxovalerate aldolase [EC:4.1.3.39]	http://www.genome.jp/dbget-bin/www_bget?ko:K01666	584.444	346.667	565	268.333	905.333	801.667
K22081	1546	1470	1622	1548	1892	1382	1708	1714	1600	830	502	636	1270	992	744	616	410	884	734	614	784	632	956	984	662	542	530	936	732	1158	686	614	650	904	1104	850	35438	methylamine---glutamate N-methyltransferase subunit A [EC:2.1.1.21]	http://www.genome.jp/dbget-bin/www_bget?ko:K22081	1609.11	656	819.333	784	760	801.333
K01856	1092	1054	914	1086	1070	810	1178	1236	1018	726	498	544	926	632	462	582	500	616	406	342	392	528	372	328	478	378	386	358	592	600	656	528	622	736	1480	748	24874	muconate cycloisomerase [EC:5.5.1.1]	http://www.genome.jp/dbget-bin/www_bget?ko:K01856	1050.89	589.333	619.667	394.667	465.333	795
K23995	1618	1392	1438	1462	1868	1104	1330	1362	1598	534	566	396	904	702	484	772	468	916	424	376	338	494	704	600	512	482	480	420	550	596	720	642	702	876	798	752	29380	lanthanide-dependent methanol dehydrogenase [EC:1.1.2.10]	http://www.genome.jp/dbget-bin/www_bget?ko:K23995	1463.56	498.667	707.667	489.333	506.667	748.333
K00481	2024	1786	2106	1934	2436	1780	2152	2212	2018	848	532	618	1264	936	804	734	540	922	468	304	414	748	638	676	952	988	1052	606	1080	996	810	640	682	784	876	692	39052	p-hydroxybenzoate 3-monooxygenase [EC:1.14.13.2]	http://www.genome.jp/dbget-bin/www_bget?ko:K00481	2049.78	666	866.667	541.333	945.667	747.333
K15513	982	828	942	1086	1276	898	1272	1208	1136	1178	790	760	962	706	830	658	576	730	518	426	470	644	904	858	698	732	768	476	744	810	768	694	694	728	828	752	29330	benzoyl-CoA-dihydrodiol lyase [EC:4.1.2.44]	http://www.genome.jp/dbget-bin/www_bget?ko:K15513	1069.78	909.333	743.667	636.667	704.667	744
K14084	680	592	918	1022	932	1268	1014	1234	1004	780	796	670	904	846	620	1254	1042	1112	1116	958	996	468	376	296	1448	1248	1312	2268	1182	2624	742	750	688	704	794	746	35404	trimethylamine corrinoid protein	http://www.genome.jp/dbget-bin/www_bget?ko:K14084	962.667	748.667	963	701.667	1680.33	737.333
K25916	818	788	1164	1268	982	1650	1254	1530	1164	464	558	470	858	690	478	652	554	834	708	636	844	388	314	240	2186	2192	2008	2728	1534	3230	762	696	686	756	786	710	37580	methoxylated aromatic compound---corrinoid protein Co-methyltransferase [EC:2.1.1.382]	http://www.genome.jp/dbget-bin/www_bget?ko:K25916	1179.78	497.333	677.667	521.667	2313	732.667
K00200	1304	1074	1068	1074	1304	872	1090	1088	984	460	456	442	1208	926	650	1434	1138	1142	440	282	484	444	426	336	788	630	662	736	590	812	742	654	638	780	818	758	28734	formylmethanofuran dehydrogenase subunit A [EC:1.2.7.12]	http://www.genome.jp/dbget-bin/www_bget?ko:K00200	1095.33	452.667	1083	402	703	731.667
K00483	1660	1316	1430	1462	1636	1020	1618	1464	1480	448	348	352	872	726	494	558	408	666	296	254	332	394	500	488	414	412	450	256	460	326	588	580	668	758	812	606	26552	4-hydroxyphenylacetate 3-monooxygenase [EC:1.14.14.9]	http://www.genome.jp/dbget-bin/www_bget?ko:K00483	1454	382.667	620.667	377.333	386.333	668.667
K10676	664	546	580	546	786	408	620	640	536	172	210	140	596	468	444	422	358	354	322	246	450	484	382	260	846	804	896	702	834	1004	530	512	526	644	1142	620	19694	2,4-dichlorophenol 6-monooxygenase [EC:1.14.13.20]	http://www.genome.jp/dbget-bin/www_bget?ko:K10676	591.778	174	440.333	357.333	847.667	662.333
K16178	172	168	274	314	242	394	196	244	270	264	336	260	446	446	362	1040	826	720	312	258	242	60	112	94	588	516	518	1762	734	1628	690	588	530	636	750	678	17670	dimethylamine---corrinoid protein Co-methyltransferase [EC:2.1.1.249]	http://www.genome.jp/dbget-bin/www_bget?ko:K16178	252.667	286.667	640	179.667	957.667	645.333
K14067	788	590	656	640	908	604	714	640	808	486	426	388	728	500	390	568	470	516	358	364	384	424	496	522	408	374	422	260	404	438	558	658	580	704	682	654	19510	malate-CoA ligase subunit beta [EC:6.2.1.9]	http://www.genome.jp/dbget-bin/www_bget?ko:K14067	705.333	433.333	528.667	424.667	384.333	639.333
K05297	170	122	198	178	158	178	142	212	148	262	164	220	206	214	190	286	334	164	206	224	254	404	192	162	534	550	592	402	446	448	430	438	490	528	1308	562	11716	rubredoxin---NAD+ reductase [EC:1.18.1.1]	http://www.genome.jp/dbget-bin/www_bget?ko:K05297	167.333	215.333	232.333	240.333	495.333	626
K04041	786	668	878	866	960	1106	770	872	990	148	230	94	928	914	590	620	694	390	564	538	612	770	418	430	1470	1460	1432	866	1012	1288	562	564	584	700	682	654	27110	fructose-1,6-bisphosphatase III [EC:3.1.3.11]	http://www.genome.jp/dbget-bin/www_bget?ko:K04041	877.333	157.333	689.333	555.333	1254.67	624.333
K02586	694	668	864	728	708	1142	706	862	856	144	410	214	642	672	664	858	794	916	610	514	532	610	396	406	1126	992	1044	1090	1008	1104	578	610	602	712	660	578	25714	nitrogenase molybdenum-iron protein alpha chain [EC:1.18.6.1]	http://www.genome.jp/dbget-bin/www_bget?ko:K02586	803.111	256	757.667	511.333	1060.67	623.333
K00232	644	710	864	692	698	750	822	802	1102	216	234	234	840	610	536	848	748	1100	322	286	348	584	408	358	648	670	716	514	810	790	528	536	592	668	762	604	22594	acyl-CoA oxidase [EC:1.3.3.6]	http://www.genome.jp/dbget-bin/www_bget?ko:K00232	787.111	228	780.333	384.333	691.333	615
K11532	1300	1110	1164	1224	1452	940	1448	1454	1290	806	502	630	854	656	632	648	556	868	626	440	556	758	728	618	626	580	616	472	580	712	618	536	632	676	726	484	28518	fructose-1,6-bisphosphatase II / sedoheptulose-1,7-bisphosphatase [EC:3.1.3.11 3.1.3.37]	http://www.genome.jp/dbget-bin/www_bget?ko:K11532	1264.67	646	702.333	621	597.667	612
K01576	1452	1132	1134	1302	1448	998	1324	1508	1310	322	364	342	878	762	562	434	342	612	370	406	454	390	466	394	724	718	738	728	814	898	598	544	650	626	598	646	26988	benzoylformate decarboxylase [EC:4.1.1.7]	http://www.genome.jp/dbget-bin/www_bget?ko:K01576	1289.78	342.667	598.333	413.333	770	610.333
K14584	1110	912	948	950	1214	768	1168	1060	934	1038	628	676	976	662	532	500	472	466	572	402	604	820	626	614	932	962	988	668	966	988	670	594	600	592	626	580	27818	2-hydroxychromene-2-carboxylate isomerase [EC:5.99.1.4]	http://www.genome.jp/dbget-bin/www_bget?ko:K14584	1007.11	780.667	601.333	606.333	917.333	610.333
K23351	450	464	622	606	646	744	680	770	824	426	456	340	1002	762	648	978	1368	948	328	302	358	316	214	140	878	742	764	1334	830	1496	586	558	544	666	632	670	24092	glutaconyl-CoA/methylmalonyl-CoA decarboxylase subunit gamma	http://www.genome.jp/dbget-bin/www_bget?ko:K23351	645.111	407.333	951	276.333	1007.33	609.333
K02203	484	422	584	572	568	450	438	480	468	358	364	296	548	416	414	424	458	306	476	434	548	588	412	306	986	992	1028	1012	1026	1346	594	516	578	622	730	600	20844	phosphoserine / homoserine phosphotransferase [EC:3.1.3.3 2.7.1.39]	http://www.genome.jp/dbget-bin/www_bget?ko:K02203	496.222	339.333	427.667	460.667	1065	606.667
K07072	562	474	536	538	774	464	552	518	584	234	210	164	648	452	344	648	598	448	454	448	546	464	438	398	1376	1294	1348	846	866	1162	586	574	612	556	608	584	21908	(4-(4-[2-(gamma-L-glutamylamino)ethyl]phenoxymethyl)furan-2-yl)methanamine synthase [EC:2.5.1.131]	http://www.genome.jp/dbget-bin/www_bget?ko:K07072	555.778	202.667	523	458	1148.67	586.667
K08295	852	806	904	972	1144	846	1232	1200	912	1134	732	770	866	594	496	688	550	632	388	342	344	300	508	398	122	140	134	124	136	244	570	504	544	666	608	592	21994	2-aminobenzoate-CoA ligase [EC:6.2.1.32]	http://www.genome.jp/dbget-bin/www_bget?ko:K08295	985.333	878.667	637.667	380	150	580.667
K00201	936	824	908	1014	1152	846	958	898	866	470	394	420	1230	1002	632	1468	1338	1116	372	324	494	400	376	312	668	586	592	648	790	916	608	538	488	588	648	578	26398	formylmethanofuran dehydrogenase subunit B [EC:1.2.7.12]	http://www.genome.jp/dbget-bin/www_bget?ko:K00201	933.556	428	1131	379.667	700	574.667
K04108	1444	1354	1434	1630	1688	1250	1850	1882	1438	1838	1270	1474	984	962	882	730	480	832	888	666	760	384	972	912	1130	918	872	1676	1172	1564	602	580	618	558	544	538	38776	4-hydroxybenzoyl-CoA reductase subunit alpha [EC:1.1.7.1]	http://www.genome.jp/dbget-bin/www_bget?ko:K04108	1552.22	1527.33	811.667	763.667	1222	573.333
K18068	1994	1606	1972	1940	2204	1380	1802	1826	1604	614	410	558	798	570	562	458	338	736	234	252	274	308	410	528	316	276	364	256	382	418	588	526	534	590	620	528	28776	phthalate 4,5-dioxygenase [EC:1.14.12.7]	http://www.genome.jp/dbget-bin/www_bget?ko:K18068	1814.22	527.333	577	334.333	335.333	564.333
K16049	460	406	530	484	522	440	504	388	516	244	224	180	596	360	304	372	262	332	342	310	388	504	286	212	652	640	664	394	726	688	602	518	536	554	628	516	16284	3,4-dihydroxy-9,10-secoandrosta-1,3,5(10)-triene-9,17-dione 4,5-dioxygenase [EC:1.13.11.25]	http://www.genome.jp/dbget-bin/www_bget?ko:K16049	472.222	216	371	340.333	627.333	559
K03862	464	336	410	430	590	368	476	442	460	310	240	226	548	350	308	320	242	290	144	148	194	370	214	116	512	610	742	328	438	550	532	446	468	572	848	480	14522	vanillate monooxygenase [EC:1.14.13.82]	http://www.genome.jp/dbget-bin/www_bget?ko:K03862	441.778	258.667	343	197.667	530	557.667
K03381	568	564	728	688	886	670	740	770	752	274	290	240	550	412	306	390	374	424	358	190	244	272	292	336	262	260	332	136	260	294	362	386	398	486	1178	514	16186	catechol 1,2-dioxygenase [EC:1.13.11.1]	http://www.genome.jp/dbget-bin/www_bget?ko:K03381	707.333	268	409.333	282	257.333	554
K02591	674	654	838	666	734	1020	680	746	838	160	340	216	568	558	626	650	704	840	454	500	476	598	376	396	874	924	868	930	878	1006	546	574	552	542	544	528	23078	nitrogenase molybdenum-iron protein beta chain [EC:1.18.6.1]	http://www.genome.jp/dbget-bin/www_bget?ko:K02591	761.111	238.667	657.667	466.667	913.333	547.667
K20807	1214	1026	1174	1212	1418	1012	1366	1308	1106	546	318	346	870	696	494	504	358	444	440	374	436	626	488	506	758	632	738	462	728	694	572	514	524	534	650	486	25574	nitrile hydratase subunit beta [EC:4.2.1.84]	http://www.genome.jp/dbget-bin/www_bget?ko:K20807	1204	403.333	561	478.333	668.667	546.667
K00577	770	668	924	1006	966	1200	864	1010	868	262	270	260	666	584	432	714	742	692	448	442	462	456	386	384	1128	1166	1076	910	746	1254	554	500	478	524	510	600	24922	tetrahydromethanopterin S-methyltransferase subunit A [EC:2.1.1.86]	http://www.genome.jp/dbget-bin/www_bget?ko:K00577	919.556	264	638.333	429.667	1046.67	527.667
K22082	1024	754	800	768	1198	574	928	836	822	312	240	310	664	502	424	302	288	322	506	412	502	410	644	612	506	402	456	672	542	698	518	428	406	608	676	488	20554	methylamine---glutamate N-methyltransferase subunit B [EC:2.1.1.21]	http://www.genome.jp/dbget-bin/www_bget?ko:K22082	856	287.333	417	514.333	546	520.667
K04116	1466	1242	1460	1432	1676	1066	1550	1662	1492	236	262	242	544	500	342	356	92	610	248	234	394	450	310	254	1036	1054	1136	758	864	972	496	470	430	582	572	510	27000	cyclohexanecarboxylate-CoA ligase [EC:6.2.1.-]	http://www.genome.jp/dbget-bin/www_bget?ko:K04116	1449.56	246.667	407.333	315	970	510
K05784	294	192	234	240	342	274	260	296	292	122	132	168	340	190	194	256	270	176	504	406	440	376	246	196	712	638	644	534	604	832	470	406	414	418	812	492	13416	benzoate/toluate 1,2-dioxygenase reductase component [EC:1.18.1.-]	http://www.genome.jp/dbget-bin/www_bget?ko:K05784	269.333	140.667	237.667	361.333	660.667	502
K00217	1104	972	966	1036	1190	782	1122	1048	1034	200	266	168	724	526	470	484	292	558	566	418	574	606	410	456	860	998	1028	538	786	900	484	534	426	518	572	466	24082	maleylacetate reductase [EC:1.3.1.32]	http://www.genome.jp/dbget-bin/www_bget?ko:K00217	1028.22	211.333	509	505	851.667	500
K07544	1776	1518	1678	1770	2084	1272	2134	2080	1908	808	476	604	638	550	414	316	76	764	462	432	570	428	546	420	1102	1278	1364	884	1074	1140	544	520	490	446	534	452	33552	benzylsuccinate CoA-transferase BbsF subunit [EC:2.8.3.15]	http://www.genome.jp/dbget-bin/www_bget?ko:K07544	1802.22	629.333	459.667	476.333	1140.33	497.667
K16176	464	456	674	752	688	770	568	674	566	490	624	500	560	812	424	688	680	764	798	622	910	258	336	294	854	562	598	1004	612	1286	410	560	402	520	570	496	22246	methylamine---corrinoid protein Co-methyltransferase [EC:2.1.1.248]	http://www.genome.jp/dbget-bin/www_bget?ko:K16176	623.556	538	654.667	536.333	819.333	493
K04073	310	306	364	322	370	458	342	356	460	70	86	94	370	244	248	364	232	468	68	72	76	128	98	68	410	360	406	292	358	468	454	410	428	564	638	418	11180	acetaldehyde dehydrogenase [EC:1.2.1.10]	http://www.genome.jp/dbget-bin/www_bget?ko:K04073	365.333	83.3333	321	85	382.333	485.333
K15511	262	224	264	256	290	176	200	228	292	632	324	430	298	226	190	314	358	232	176	192	210	206	210	170	184	264	290	132	288	232	476	436	492	462	584	436	10636	benzoyl-CoA 2,3-epoxidase subunit A [EC:1.14.13.208]	http://www.genome.jp/dbget-bin/www_bget?ko:K15511	243.556	462	269.667	194	231.667	481
K00146	1028	888	1040	1080	1136	910	1062	1198	944	286	168	316	856	620	468	602	338	572	480	398	716	364	466	412	416	444	468	340	394	498	420	478	484	420	550	492	21752	phenylacetaldehyde dehydrogenase [EC:1.2.1.39]	http://www.genome.jp/dbget-bin/www_bget?ko:K00146	1031.78	256.667	576	472.667	426.667	474
K05713	266	334	356	264	346	326	356	284	270	240	158	176	234	190	136	96	56	82	92	86	110	260	132	160	238	270	242	112	222	206	120	122	266	342	1496	466	9112	2,3-dihydroxyphenylpropionate 1,2-dioxygenase [EC:1.13.11.16]	http://www.genome.jp/dbget-bin/www_bget?ko:K05713	311.333	191.333	132.333	140	215	468.667
K06034	746	678	706	598	810	542	854	830	654	432	298	306	506	372	348	308	256	332	266	292	272	364	368	332	342	248	256	366	396	414	462	424	452	514	528	424	16296	sulfopyruvate decarboxylase subunit alpha [EC:4.1.1.79]	http://www.genome.jp/dbget-bin/www_bget?ko:K06034	713.111	345.333	353.667	315.667	337	467.333
K01721	914	988	1006	1034	1288	788	1104	1102	882	562	420	354	970	640	560	466	404	518	392	422	478	602	630	502	580	570	640	458	670	704	540	416	424	410	512	464	23414	nitrile hydratase subunit alpha [EC:4.2.1.84]	http://www.genome.jp/dbget-bin/www_bget?ko:K01721	1011.78	445.333	593	504.333	603.667	461
K01086	78	88	116	126	174	122	100	112	84	794	492	490	814	506	486	602	428	314	124	138	118	112	126	98	326	354	344	320	436	396	468	430	454	522	484	390	11566	fructose-1,6-bisphosphatase I / sedoheptulose-1,7-bisphosphatase [EC:3.1.3.11 3.1.3.37]	http://www.genome.jp/dbget-bin/www_bget?ko:K01086	111.111	592	525	119.333	362.667	458
K01800	320	258	322	308	358	218	302	310	300	326	258	296	530	348	246	264	298	166	186	160	202	308	244	242	328	280	292	272	394	320	356	322	358	438	852	382	11364	maleylacetoacetate isomerase [EC:5.2.1.2]	http://www.genome.jp/dbget-bin/www_bget?ko:K01800	299.556	293.333	308.667	223.667	314.333	451.333
K16179	562	614	864	926	694	1086	642	868	686	606	538	466	654	690	416	774	718	856	594	450	560	222	204	154	940	874	762	1222	682	1452	444	448	354	484	486	486	23478	dimethylamine corrinoid protein	http://www.genome.jp/dbget-bin/www_bget?ko:K16179	771.333	536.667	684.667	364	988.667	450.333
K15054	716	598	586	670	780	398	766	730	612	518	292	342	716	454	366	476	348	298	118	94	130	382	178	162	136	76	134	84	170	170	430	472	416	448	474	402	14142	(S)-mandelate dehydrogenase [EC:1.1.99.31]	http://www.genome.jp/dbget-bin/www_bget?ko:K15054	650.667	384	443	177.333	128.333	440.333
K00002	292	254	356	302	370	478	338	338	432	160	218	86	236	250	202	222	344	172	552	486	616	568	468	268	686	658	664	520	662	784	514	392	494	344	394	454	14574	alcohol dehydrogenase (NADP+) [EC:1.1.1.2]	http://www.genome.jp/dbget-bin/www_bget?ko:K00002	351.111	154.667	237.667	493	662.333	432
K04102	2416	1950	2120	2328	2830	1786	2334	2508	2058	1146	824	810	1056	808	660	426	236	676	630	502	470	524	490	460	1100	1032	1220	780	826	1182	394	420	422	428	446	476	38774	4,5-dihydroxyphthalate decarboxylase [EC:4.1.1.55]	http://www.genome.jp/dbget-bin/www_bget?ko:K04102	2258.89	926.667	643.667	512.667	1023.33	431
K15055	652	554	646	712	920	680	682	788	762	530	334	458	1358	860	680	880	1140	696	418	272	386	324	390	236	496	492	500	556	542	622	442	384	412	420	512	390	21126	2-nitrobenzoate nitroreductase [EC:1.7.1.-]	http://www.genome.jp/dbget-bin/www_bget?ko:K15055	710.667	440.667	935.667	337.667	534.667	426.667
K07517	312	258	298	332	304	312	328	288	308	372	174	222	228	250	240	220	300	222	248	214	352	358	208	204	532	502	492	722	700	890	392	388	436	396	498	436	12936	Delta3-Delta2-enoyl-CoA isomerase [EC:5.3.3.8]	http://www.genome.jp/dbget-bin/www_bget?ko:K07517	304.444	256	243.333	264	639.667	424.333
K04101	1074	978	1196	1152	1300	1086	1082	1090	1210	406	332	376	690	428	396	364	284	454	172	118	212	208	402	332	744	1062	1152	494	826	718	494	358	436	444	420	372	22862	protocatechuate 4,5-dioxygenase, beta chain [EC:1.13.11.8]	http://www.genome.jp/dbget-bin/www_bget?ko:K04101	1129.78	371.333	436	240.667	832.667	420.667
K00672	444	456	424	454	706	352	440	418	444	240	274	236	684	480	352	526	556	432	250	260	276	324	246	236	672	584	530	640	566	794	392	352	376	494	510	382	15802	formylmethanofuran--tetrahydromethanopterin N-formyltransferase [EC:2.3.1.101]	http://www.genome.jp/dbget-bin/www_bget?ko:K00672	459.778	250	505	265.333	631	417.667
K18933	234	150	240	246	290	304	136	212	138	520	502	394	316	260	226	510	604	330	404	266	370	710	444	564	712	656	688	650	662	874	454	398	360	440	414	422	15100	tyrosine decarboxylase / aspartate 1-decarboxylase [EC:4.1.1.25 4.1.1.11]	http://www.genome.jp/dbget-bin/www_bget?ko:K18933	216.667	472	374.333	459.667	707	414.667
K00151	732	774	710	818	868	650	786	808	816	360	228	238	976	604	540	542	430	414	268	228	316	416	524	486	604	718	740	390	658	538	456	424	448	384	404	370	19666	5-carboxymethyl-2-hydroxymuconic-semialdehyde dehydrogenase [EC:1.2.1.60]	http://www.genome.jp/dbget-bin/www_bget?ko:K00151	773.556	275.333	584.333	373	608	414.333
K01499	622	470	612	630	782	554	552	530	566	266	282	238	774	644	336	788	732	662	234	202	304	288	286	238	690	596	614	596	500	796	376	350	386	452	458	454	17860	methenyltetrahydromethanopterin cyclohydrolase [EC:3.5.4.27]	http://www.genome.jp/dbget-bin/www_bget?ko:K01499	590.889	262	656	258.667	632	412.667
K15060	470	404	510	584	606	460	660	584	558	160	174	148	390	266	194	242	102	264	136	72	90	214	186	124	478	432	508	238	306	336	458	398	332	478	494	314	12370	5,5'-dehydrodivanillate O-demethylase oxygenase subunit [EC:1.14.13.-]	http://www.genome.jp/dbget-bin/www_bget?ko:K15060	537.333	160.667	243	137	383	412.333
K04098	680	640	740	696	798	612	692	722	662	330	220	180	786	462	404	230	182	342	160	200	192	344	284	158	488	434	524	248	382	390	426	398	414	424	434	372	15650	hydroxyquinol 1,2-dioxygenase [EC:1.13.11.37]	http://www.genome.jp/dbget-bin/www_bget?ko:K04098	693.556	243.333	401	223	411	411.333
K01617	738	646	828	856	990	746	944	898	840	398	244	304	566	364	346	408	254	450	68	110	132	306	136	106	402	380	400	216	336	324	436	400	326	452	506	324	16180	2-oxo-3-hexenedioate decarboxylase [EC:4.1.1.77]	http://www.genome.jp/dbget-bin/www_bget?ko:K01617	831.778	315.333	398	143	343	407.333
K03863	406	370	496	462	402	362	422	448	440	278	222	176	370	296	202	252	248	220	90	74	94	206	182	106	186	200	146	108	172	192	280	266	316	458	824	288	10260	vanillate monooxygenase ferredoxin subunit	http://www.genome.jp/dbget-bin/www_bget?ko:K03863	423.111	225.333	264.667	125.333	167.333	405.333
K05549	370	260	326	314	350	152	294	278	238	140	164	118	246	194	150	260	224	194	76	40	72	82	92	112	204	234	186	130	140	182	242	226	354	318	908	364	8234	benzoate/toluate 1,2-dioxygenase subunit alpha [EC:1.14.12.10 1.14.12.-]	http://www.genome.jp/dbget-bin/www_bget?ko:K05549	286.889	140.667	211.333	79	179.333	402
K17754	414	306	482	440	422	388	404	474	458	230	192	190	466	356	240	408	316	328	352	320	304	490	244	278	718	636	598	498	540	764	354	306	344	382	612	414	14668	cyclopentanol dehydrogenase [EC:1.1.1.163]	http://www.genome.jp/dbget-bin/www_bget?ko:K17754	420.889	204	352.333	331.333	625.667	402
K04113	1480	1296	1376	1604	1816	1424	2150	2092	1530	2054	1464	1706	846	790	608	654	802	798	568	466	696	272	786	802	602	616	568	912	624	976	404	408	456	362	362	406	34776	benzoyl-CoA reductase subunit B [EC:1.3.7.8]	http://www.genome.jp/dbget-bin/www_bget?ko:K04113	1640.89	1741.33	749.667	598.333	716.333	399.667
K02588	368	404	474	340	420	516	416	462	440	140	292	150	366	384	336	502	426	550	300	342	256	332	300	244	470	456	492	428	424	626	376	396	354	410	394	396	13982	nitrogenase iron protein NifH	http://www.genome.jp/dbget-bin/www_bget?ko:K02588	426.667	194	427.333	295.667	482.667	387.667
K08692	290	276	316	356	444	318	368	388	334	206	234	190	380	242	232	244	292	232	180	160	164	216	250	302	186	164	184	116	230	150	418	306	378	378	464	356	9944	malate-CoA ligase subunit alpha [EC:6.2.1.9]	http://www.genome.jp/dbget-bin/www_bget?ko:K08692	343.333	210	270.333	212	171.667	383.333
K21647	340	244	340	358	388	302	340	446	328	260	202	230	432	428	294	380	370	336	606	464	696	352	308	284	624	552	522	650	486	760	378	410	402	328	356	408	14604	tetrachloroethene reductive dehalogenase [EC:1.21.99.5]	http://www.genome.jp/dbget-bin/www_bget?ko:K21647	342.889	230.667	373.333	451.667	599	380.333
K00455	252	260	280	304	322	262	346	362	276	112	96	62	368	236	206	234	166	192	122	114	178	130	234	178	368	376	376	202	312	304	398	360	366	450	396	306	9506	3,4-dihydroxyphenylacetate 2,3-dioxygenase [EC:1.13.11.15]	http://www.genome.jp/dbget-bin/www_bget?ko:K00455	296	90	233.667	159.333	323	379.333
K10221	1868	1756	1890	1750	2166	1548	1928	1802	1686	782	530	592	970	608	534	504	312	572	232	194	210	300	414	352	586	608	666	428	640	546	390	370	380	340	362	398	29214	2-pyrone-4,6-dicarboxylate lactonase [EC:3.1.1.57]	http://www.genome.jp/dbget-bin/www_bget?ko:K10221	1821.56	634.667	583.333	283.667	579	373.333
K00448	908	838	966	948	1006	864	978	966	940	322	222	230	542	446	202	278	118	344	250	196	244	300	244	298	286	318	298	198	342	332	338	308	314	374	488	334	16580	protocatechuate 3,4-dioxygenase, alpha subunit [EC:1.13.11.3]	http://www.genome.jp/dbget-bin/www_bget?ko:K00448	934.889	258	321.667	255.333	295.667	359.333
K01821	528	426	526	468	628	548	554	604	656	270	224	192	496	348	254	372	396	364	386	318	332	328	292	246	744	642	722	630	634	960	340	288	334	340	432	374	16196	4-oxalocrotonate tautomerase [EC:5.3.2.6]	http://www.genome.jp/dbget-bin/www_bget?ko:K01821	548.667	228.667	371.667	317	722	351.333
K10219	790	852	910	956	1008	868	1006	888	1088	574	462	408	830	472	498	454	358	420	206	174	230	268	388	374	592	782	798	488	748	714	326	298	346	398	388	346	20706	2-hydroxy-4-carboxymuconate semialdehyde hemiacetal dehydrogenase [EC:1.1.1.312]	http://www.genome.jp/dbget-bin/www_bget?ko:K10219	929.556	481.333	505.333	273.333	687	350.333
K07539	714	628	664	654	856	614	910	960	804	1454	958	1056	592	450	462	388	480	400	600	428	504	224	614	622	692	534	546	1372	786	1462	344	354	386	328	340	348	23528	6-oxocyclohex-1-ene-carbonyl-CoA hydrolase [EC:3.7.1.21]	http://www.genome.jp/dbget-bin/www_bget?ko:K07539	756	1156	462	498.667	898.667	350
K16242	62	40	48	28	46	48	50	50	32	88	88	78	218	150	130	332	258	278	124	98	140	76	100	102	176	164	136	112	202	150	316	278	346	408	450	288	5690	phenol/toluene 2-monooxygenase (NADH) P3/A3 [EC:1.14.13.244 1.14.13.243]	http://www.genome.jp/dbget-bin/www_bget?ko:K16242	44.8889	84.6667	227.667	106.667	156.667	347.667
K01781	1266	1244	1282	1370	1890	1068	1678	1774	1512	962	568	732	986	582	494	486	374	560	360	284	278	304	424	306	270	258	254	160	236	278	354	316	332	342	412	316	24312	mandelate racemase [EC:5.1.2.2]	http://www.genome.jp/dbget-bin/www_bget?ko:K01781	1453.78	754	580.333	326	242.667	345.333
K00202	412	318	456	486	628	314	358	428	380	236	188	142	588	450	324	730	642	492	196	206	324	224	202	178	468	394	422	390	338	614	310	300	298	432	352	366	13586	formylmethanofuran dehydrogenase subunit C [EC:1.2.7.12]	http://www.genome.jp/dbget-bin/www_bget?ko:K00202	420	188.667	537.667	221.667	437.667	343
K03380	1000	980	1384	970	1288	1166	1076	898	1274	340	272	292	772	414	448	394	176	614	272	200	256	382	400	340	686	862	1024	394	750	734	290	294	308	356	456	328	22090	phenol 2-monooxygenase (NADPH) [EC:1.14.13.7]	http://www.genome.jp/dbget-bin/www_bget?ko:K03380	1115.11	301.333	469.667	308.333	741.667	338.667
K07536	478	388	424	500	622	496	626	628	556	344	244	280	410	344	210	256	210	286	146	110	172	146	202	224	318	242	322	272	256	360	356	382	300	356	368	268	12102	2-ketocyclohexanecarboxyl-CoA hydrolase [EC:3.1.2.-]	http://www.genome.jp/dbget-bin/www_bget?ko:K07536	524.222	289.333	286	166.667	295	338.333
K16246	104	82	82	86	54	86	214	182	166	62	70	58	234	208	212	270	316	256	234	170	242	106	156	136	160	106	126	252	256	332	294	306	318	324	386	346	6992	phenol/toluene 2-monooxygenase (NADH) P5/A5 [EC:1.14.13.244 1.14.13.243]	http://www.genome.jp/dbget-bin/www_bget?ko:K16246	117.333	63.3333	249.333	174	205.333	329
K01031	338	258	308	324	328	242	384	306	306	352	206	252	412	250	212	218	220	142	150	124	168	268	134	134	204	186	176	136	294	260	220	182	214	340	682	334	9264	3-oxoadipate CoA-transferase, alpha subunit [EC:2.8.3.6]	http://www.genome.jp/dbget-bin/www_bget?ko:K01031	310.444	270	242.333	163	209.333	328.667
K10713	512	396	512	450	564	370	430	408	418	162	166	170	470	316	300	370	310	306	194	150	196	174	152	160	316	220	262	262	296	408	294	294	240	414	364	362	11388	5,6,7,8-tetrahydromethanopterin hydro-lyase [EC:4.2.1.147]	http://www.genome.jp/dbget-bin/www_bget?ko:K10713	451.111	166	345.333	171	294	328
K18365	132	96	120	102	128	106	116	62	112	68	58	58	122	122	76	160	180	86	40	76	100	100	82	74	274	228	314	178	220	230	186	118	226	264	818	346	5778	4-hydroxy-2-oxovalerate/4-hydroxy-2-oxohexanoate aldolase [EC:4.1.3.39 4.1.3.43]	http://www.genome.jp/dbget-bin/www_bget?ko:K18365	108.222	61.3333	124.333	78.6667	240.667	326.333
K22087	264	258	306	266	368	240	204	216	288	298	242	226	350	230	194	232	228	202	224	228	276	298	228	146	350	266	314	276	356	400	332	280	290	324	428	298	9926	methylglutamate dehydrogenase subunit D [EC:1.5.99.5]	http://www.genome.jp/dbget-bin/www_bget?ko:K22087	267.778	255.333	239.333	233.333	327	325.333
K04112	1042	900	1072	1148	1310	1176	1580	1626	1252	1484	846	1058	714	646	486	604	730	580	618	400	466	212	608	472	524	544	534	1058	668	1234	284	360	262	406	328	296	27528	benzoyl-CoA reductase subunit C [EC:1.3.7.8]	http://www.genome.jp/dbget-bin/www_bget?ko:K04112	1234	1129.33	626.667	462.667	760.333	322.667
K01615	216	204	262	302	298	396	300	336	284	474	458	398	246	214	198	158	312	248	402	368	368	132	290	224	830	656	766	1292	856	1476	304	270	300	362	306	368	14874	glutaconyl-CoA decarboxylase subunit alpha [EC:7.2.4.5]	http://www.genome.jp/dbget-bin/www_bget?ko:K01615	288.667	443.333	229.333	297.333	979.333	318.333
K11260	244	286	350	428	378	478	294	328	368	376	308	380	320	320	184	392	338	356	620	480	506	164	284	148	818	754	748	876	592	1450	298	266	318	358	352	316	15476	4Fe-4S ferredoxin	http://www.genome.jp/dbget-bin/www_bget?ko:K11260	350.444	354.667	318.333	367	873	318
K16514	1288	1064	1322	1206	1366	1008	1126	1072	1206	338	252	288	858	520	442	322	284	420	310	230	270	556	498	420	554	604	582	296	498	578	306	318	296	316	368	288	21670	4-oxalomesaconate tautomerase [EC:5.3.2.8]	http://www.genome.jp/dbget-bin/www_bget?ko:K16514	1184.22	292.667	474.333	380.667	518.667	315.333
K18067	368	372	416	466	686	348	512	578	470	154	124	124	442	342	224	274	170	228	136	150	166	138	156	132	348	300	352	274	310	330	286	270	268	372	390	304	10980	phthalate 4,5-cis-dihydrodiol dehydrogenase [EC:1.3.1.64]	http://www.genome.jp/dbget-bin/www_bget?ko:K18067	468.444	134	280	146.333	319	315
K18366	126	134	144	116	136	182	112	76	136	74	64	64	102	96	94	118	166	140	142	126	176	106	130	104	256	266	232	188	274	280	220	176	222	230	730	286	6224	acetaldehyde/propanal dehydrogenase [EC:1.2.1.10 1.2.1.87]	http://www.genome.jp/dbget-bin/www_bget?ko:K18366	129.111	67.3333	119.333	130.667	249.333	310.667
K16260	166	174	156	160	198	172	170	178	248	138	168	110	292	192	172	212	198	138	54	46	108	106	74	78	86	74	90	56	124	72	316	260	288	386	362	242	6064	mxaD protein	http://www.genome.jp/dbget-bin/www_bget?ko:K16260	180.222	138.667	200.667	77.6667	83.6667	309
K14940	188	132	168	268	210	216	156	228	166	158	124	194	166	168	128	106	114	184	428	252	322	134	170	150	374	306	292	296	376	490	350	362	320	238	226	356	8516	gamma-F420-2:alpha-L-glutamate ligase [EC:6.3.2.32]	http://www.genome.jp/dbget-bin/www_bget?ko:K14940	192.444	158.667	144.333	242.667	355.667	308.667
K13767	322	336	348	302	356	286	304	344	350	254	230	164	244	264	240	208	390	214	324	312	328	328	202	180	560	554	560	622	516	714	314	270	278	378	326	274	12196	enoyl-CoA hydratase [EC:4.2.1.17]	http://www.genome.jp/dbget-bin/www_bget?ko:K13767	327.556	216	260	279	587.667	306.667
K19515	194	162	250	256	206	366	238	376	242	482	440	442	192	298	200	134	196	126	1188	780	880	358	492	312	1108	878	1016	1880	1156	1890	264	328	210	328	356	340	18564	benzoyl-CoA reductase subunit BamB [EC:1.3.-.-]	http://www.genome.jp/dbget-bin/www_bget?ko:K19515	254.444	454.667	191	668.333	1321.33	304.333
K08685	294	214	280	242	298	248	282	346	306	272	150	130	256	234	138	158	172	166	72	60	68	80	146	104	294	200	214	204	196	238	290	302	278	320	324	310	7886	quinohemoprotein amine dehydrogenase [EC:1.4.9.1]	http://www.genome.jp/dbget-bin/www_bget?ko:K08685	278.889	184	187.333	88.3333	224.333	304
K05708	408	330	398	326	318	288	356	330	376	8	34	60	124	96	90	50	34	132	88	86	78	140	112	140	418	382	348	274	298	368	110	62	180	194	944	312	8292	3-phenylpropionate/trans-cinnamate dioxygenase subunit alpha [EC:1.14.12.19]	http://www.genome.jp/dbget-bin/www_bget?ko:K05708	347.778	34	87.6667	107.333	348	300.333
K14080	316	270	400	430	360	594	368	436	356	236	172	240	594	446	352	956	900	866	762	560	548	350	298	320	1408	1228	1156	1318	948	1730	262	294	274	318	302	334	20702	[methyl-Co(III) methanol/glycine betaine-specific corrinoid protein]:coenzyme M methyltransferase [EC:2.1.1.246 2.1.1.377]	http://www.genome.jp/dbget-bin/www_bget?ko:K14080	392.222	216	685.667	473	1298	297.333
K10220	940	916	1106	976	1198	796	1052	994	1022	532	358	428	790	468	426	410	234	458	194	170	178	286	362	276	476	574	574	352	592	560	354	260	288	354	258	268	19480	4-oxalmesaconate hydratase [EC:4.2.1.83]	http://www.genome.jp/dbget-bin/www_bget?ko:K10220	1000	439.333	464.333	244.333	521.333	297
K00055	744	620	876	776	802	772	906	798	1050	174	144	190	356	278	250	224	42	390	204	160	200	198	178	158	422	402	380	384	342	396	298	306	226	332	356	262	14596	aryl-alcohol dehydrogenase [EC:1.1.1.90]	http://www.genome.jp/dbget-bin/www_bget?ko:K00055	816	169.333	256.667	183	387.667	296.667
K13039	754	660	694	696	774	530	738	788	526	246	242	204	404	282	250	292	168	272	304	210	288	292	310	336	272	228	282	314	280	424	298	262	252	326	322	304	13824	sulfopyruvate decarboxylase subunit beta [EC:4.1.1.79]	http://www.genome.jp/dbget-bin/www_bget?ko:K13039	684.444	230.667	278	290	300	294
K16239	506	418	494	504	616	654	624	726	596	496	290	372	554	538	474	434	490	412	268	316	254	262	316	312	556	580	556	964	714	868	298	280	268	296	306	294	16906	4-hydroxybenzoate decarboxylase subunit C [EC:4.1.1.61]	http://www.genome.jp/dbget-bin/www_bget?ko:K16239	570.889	386	483.667	288	706.333	290.333
K09733	420	344	462	438	552	384	422	418	458	180	140	158	574	398	300	450	394	326	150	200	232	232	200	154	492	448	518	460	428	526	302	262	266	316	288	300	12592	(5-formylfuran-3-yl)methyl phosphate synthase [EC:4.2.3.153]	http://www.genome.jp/dbget-bin/www_bget?ko:K09733	433.111	159.333	407	194.667	478.667	289
K01032	230	192	224	280	242	260	268	290	244	406	210	238	376	238	256	222	236	168	146	120	174	262	124	98	268	246	216	242	248	324	210	226	306	236	496	252	8774	3-oxoadipate CoA-transferase, beta subunit [EC:2.8.3.6]	http://www.genome.jp/dbget-bin/www_bget?ko:K01032	247.778	284.667	249.333	154	257.333	287.667
K08094	166	196	272	280	228	324	258	346	264	224	186	194	328	256	168	428	348	404	244	212	250	234	124	86	362	276	330	288	234	368	326	260	242	308	246	326	9586	6-phospho-3-hexuloisomerase [EC:5.3.1.27]	http://www.genome.jp/dbget-bin/www_bget?ko:K08094	259.333	201.333	322	191.667	309.667	284.667
K07144	394	320	408	402	510	332	404	410	350	132	142	102	454	326	288	516	450	376	182	156	194	200	192	138	554	430	500	486	366	580	300	190	282	332	256	286	11940	5-(aminomethyl)-3-furanmethanol phosphate kinase [EC:2.7.4.31]	http://www.genome.jp/dbget-bin/www_bget?ko:K07144	392.222	125.333	401.667	177	486	274.333
K18277	294	242	234	256	358	250	324	302	306	286	182	180	284	160	136	220	192	178	70	78	94	128	298	310	140	164	134	142	130	150	206	200	206	256	444	226	7760	trimethylamine monooxygenase [EC:1.14.13.148]	http://www.genome.jp/dbget-bin/www_bget?ko:K18277	285.111	216	195	163	143.333	256.333
K04114	608	560	552	562	614	432	862	852	640	1218	862	840	494	368	354	382	324	350	170	118	148	64	412	412	194	148	226	366	244	412	262	230	270	238	252	284	15324	benzoyl-CoA reductase subunit A [EC:1.3.7.8]	http://www.genome.jp/dbget-bin/www_bget?ko:K04114	631.333	973.333	378.667	220.667	265	256
K13239	264	252	252	270	286	216	304	336	302	388	282	278	284	278	236	244	258	206	166	152	194	186	150	126	326	256	240	344	302	416	278	228	200	254	262	302	9318	Delta3-Delta2-enoyl-CoA isomerase [EC:5.3.3.8]	http://www.genome.jp/dbget-bin/www_bget?ko:K13239	275.778	316	251	162.333	314	254
K14333	740	646	814	886	1124	568	890	912	846	68	58	78	260	208	176	74	10	182	36	52	124	68	50	20	46	14	20	16	56	64	250	190	216	242	310	210	10524	2,3-dihydroxybenzoate decarboxylase [EC:4.1.1.46]	http://www.genome.jp/dbget-bin/www_bget?ko:K14333	825.111	68	151.667	58.3333	36	236.333
K15057	138	108	160	216	248	198	102	148	190	74	114	120	292	146	178	212	126	170	216	218	202	420	168	156	452	374	344	474	412	612	240	184	200	262	322	192	8388	nitrobenzene nitroreductase [EC:1.7.1.16]	http://www.genome.jp/dbget-bin/www_bget?ko:K15057	167.556	102.667	187.333	230	444.667	233.333
K15229	424	360	374	422	536	346	386	388	310	526	360	336	562	364	254	430	524	268	146	108	178	158	218	190	266	310	300	232	352	292	228	288	268	202	182	220	11308	methylamine dehydrogenase heavy chain [EC:1.4.9.1]	http://www.genome.jp/dbget-bin/www_bget?ko:K15229	394	407.333	400.333	166.333	292	231.333
K16306	304	308	320	446	512	398	488	510	458	260	230	248	268	330	188	526	474	502	318	258	246	62	144	180	240	196	220	288	120	336	214	222	222	272	228	214	10750	fructose-bisphosphate aldolase / 2-amino-3,7-dideoxy-D-threo-hept-6-ulosonate synthase [EC:4.1.2.13 2.2.1.10]	http://www.genome.jp/dbget-bin/www_bget?ko:K16306	416	246	381.333	201.333	233.333	228.667
K05797	412	356	464	424	440	358	410	494	400	140	62	136	128	70	76	104	54	176	116	100	90	136	96	66	242	312	296	114	216	238	270	202	196	192	236	246	8068	4-cresol dehydrogenase (hydroxylating) flavoprotein subunit [EC:1.17.9.1]	http://www.genome.jp/dbget-bin/www_bget?ko:K05797	417.556	112.667	101.333	100.667	236.333	223.667
K21607	172	194	254	170	228	244	228	214	240	12	24	10	100	44	52	62	42	124	6	4	10	14	18	10	222	228	322	66	76	142	182	200	218	284	278	170	4864	tetrachlorobenzoquinone reductase [EC:1.1.1.404]	http://www.genome.jp/dbget-bin/www_bget?ko:K21607	216	15.3333	70.6667	10.3333	176	222
K09479	216	202	152	156	290	256	216	202	204	228	146	226	498	396	266	286	278	248	50	40	80	90	90	120	170	174	146	182	162	188	214	182	216	210	270	230	7280	very long chain acyl-CoA dehydrogenase [EC:1.3.8.9]	http://www.genome.jp/dbget-bin/www_bget?ko:K09479	210.444	200	328.667	78.3333	170.333	220.333
K03532	30	48	58	46	84	38	46	30	42	28	26	22	80	74	64	134	258	94	112	76	98	92	68	76	404	378	358	170	178	150	176	200	210	242	236	228	4654	trimethylamine-N-oxide reductase (cytochrome c), cytochrome c-type subunit TorC	http://www.genome.jp/dbget-bin/www_bget?ko:K03532	46.8889	25.3333	117.333	87	273	215.333
K04110	1118	934	1130	1086	1344	828	1524	1388	1196	1008	678	670	762	658	504	490	384	464	366	248	260	206	630	506	356	374	472	358	462	466	250	210	242	192	182	212	22158	benzoate-CoA ligase [EC:6.2.1.25]	http://www.genome.jp/dbget-bin/www_bget?ko:K04110	1172	785.333	543.667	369.333	414.667	214.667
K04117	278	260	230	374	330	204	342	276	270	94	76	76	272	208	158	164	108	208	114	156	152	176	138	154	348	300	354	250	354	288	194	206	206	258	216	206	7998	cyclohexanecarboxyl-CoA dehydrogenase [EC:1.3.99.-]	http://www.genome.jp/dbget-bin/www_bget?ko:K04117	284.889	82	186.333	148.333	315.667	214.333
K21802	866	850	960	954	1100	864	1072	1190	1232	456	254	376	530	320	246	276	214	338	232	170	226	302	220	220	148	160	122	116	148	186	204	124	166	188	430	166	15626	vanillin dehydrogenase [EC:1.2.1.67]	http://www.genome.jp/dbget-bin/www_bget?ko:K21802	1009.78	362	320.667	228.333	146.667	213
K05550	106	86	140	78	110	92	106	84	104	84	46	58	132	78	80	94	128	54	44	42	54	64	50	44	66	72	64	44	58	66	184	162	182	226	334	184	3600	benzoate/toluate 1,2-dioxygenase subunit beta [EC:1.14.12.10 1.14.12.-]	http://www.genome.jp/dbget-bin/www_bget?ko:K05550	100.667	62.6667	94.3333	49.6667	61.6667	212
K05711	44	36	74	28	38	36	40	34	70	0	0	0	40	8	28	6	0	42	2	4	6	2	0	0	4	0	2	0	0	0	64	20	108	154	700	208	1798	2,3-dihydroxy-2,3-dihydrophenylpropionate dehydrogenase [EC:1.3.1.87]	http://www.genome.jp/dbget-bin/www_bget?ko:K05711	44.4444	0	20.6667	2.33333	1	209
K08097	516	422	450	494	566	432	632	754	480	206	218	202	332	240	260	254	290	262	142	128	148	94	152	156	364	368	378	572	366	580	184	214	190	282	172	202	11702	phosphosulfolactate synthase [EC:4.4.1.19]	http://www.genome.jp/dbget-bin/www_bget?ko:K08097	527.333	208.667	273	136.667	438	207.333
K20712	166	148	134	170	218	110	216	174	168	878	522	570	644	286	314	300	308	154	34	18	30	30	72	44	8	28	36	16	28	34	198	220	246	218	200	154	7094	3-(hydroxyamino)phenol mutase [EC:5.4.4.3]	http://www.genome.jp/dbget-bin/www_bget?ko:K20712	167.111	656.667	334.333	38	25	206
K01075	632	540	500	588	740	426	722	710	598	356	270	258	396	244	218	264	254	282	128	84	128	128	252	204	154	166	190	170	162	196	226	190	226	168	204	218	11192	4-hydroxybenzoyl-CoA thioesterase [EC:3.1.2.23]	http://www.genome.jp/dbget-bin/www_bget?ko:K01075	606.222	294.667	276.333	154	173	205.333
K00300	400	342	402	354	464	284	338	364	390	52	72	72	308	256	202	192	176	168	190	110	210	174	168	128	460	400	386	392	318	456	222	188	174	210	250	184	9456	methylenetetrahydrofolate/methylenetetrahydromethanopterin dehydrogenase (NADP+) [EC:1.5.1.5 1.5.1.-]	http://www.genome.jp/dbget-bin/www_bget?ko:K00300	370.889	65.3333	217	163.333	402	204.667
K15765	318	248	270	344	350	272	298	364	330	144	86	70	252	198	140	220	154	182	48	40	34	40	78	82	26	30	52	28	32	42	208	170	162	226	252	186	5976	toluene monooxygenase electron transfer component [EC:1.18.1.3]	http://www.genome.jp/dbget-bin/www_bget?ko:K15765	310.444	100	191	53.6667	35	200.667
K05783	66	54	46	60	42	70	58	48	46	24	22	36	74	42	30	80	96	54	28	12	6	54	6	8	68	58	42	20	38	18	84	58	80	140	644	188	2500	dihydroxycyclohexadiene carboxylate dehydrogenase [EC:1.3.1.25 1.3.1.-]	http://www.genome.jp/dbget-bin/www_bget?ko:K05783	54.4444	27.3333	62.6667	19	40.6667	199
K14082	200	122	204	198	206	290	180	222	158	110	66	114	362	274	204	306	460	262	154	136	138	78	62	52	250	196	218	306	262	304	220	188	184	180	238	184	7288	[methyl-Co(III) methylamine-specific corrinoid protein]:coenzyme M methyltransferase [EC:2.1.1.247]	http://www.genome.jp/dbget-bin/www_bget?ko:K14082	197.778	96.6667	311.333	103.333	256	199
K16254	926	724	854	884	982	614	742	790	750	114	130	122	408	268	242	314	260	394	260	246	330	268	340	256	462	474	474	398	420	582	168	196	142	258	224	206	15222	mxaJ protein	http://www.genome.jp/dbget-bin/www_bget?ko:K16254	807.333	122	314.333	283.333	468.333	199
K18092	168	170	164	220	208	170	168	168	184	142	64	72	336	208	204	148	124	158	228	228	186	216	192	206	200	190	174	152	336	254	184	174	206	170	236	192	6800	2-hydroxy-6-oxo-octa-2,4-dienoate hydrolase [EC:3.7.1.-]	http://www.genome.jp/dbget-bin/www_bget?ko:K18092	180	92.6667	196.333	209.333	217.667	193.667
K04109	630	468	634	702	808	478	908	848	632	618	380	428	322	324	296	252	178	274	402	262	284	132	350	302	314	254	288	534	418	642	168	166	224	176	214	192	14502	4-hydroxybenzoyl-CoA reductase subunit beta [EC:1.1.7.1]	http://www.genome.jp/dbget-bin/www_bget?ko:K04109	678.667	475.333	274.333	288.667	408.333	190
K07538	390	384	352	384	502	436	596	678	536	874	546	636	284	284	246	182	252	238	230	224	250	112	250	270	444	378	374	766	476	906	196	162	182	184	176	230	13610	6-hydroxycyclohex-1-ene-1-carbonyl-CoA dehydrogenase [EC:1.1.1.368]	http://www.genome.jp/dbget-bin/www_bget?ko:K07538	473.111	685.333	247.667	222.667	557.333	188.333
K13831	252	170	198	228	226	230	328	274	266	218	176	234	206	196	176	398	362	328	130	102	110	54	86	26	146	114	140	148	98	202	150	200	152	186	216	218	6944	3-hexulose-6-phosphate synthase / 6-phospho-3-hexuloisomerase [EC:4.1.2.43 5.3.1.27]	http://www.genome.jp/dbget-bin/www_bget?ko:K13831	241.333	209.333	277.667	84.6667	141.333	187
K18364	98	128	204	138	174	130	104	134	152	48	30	56	94	116	76	140	232	124	126	76	166	120	86	114	242	252	244	192	242	232	198	158	212	172	172	198	5380	2-oxopent-4-enoate/cis-2-oxohex-4-enoate hydratase [EC:4.2.1.80 4.2.1.132]	http://www.genome.jp/dbget-bin/www_bget?ko:K18364	140.222	44.6667	130.333	114.667	234	185
K22553	536	522	554	548	522	502	486	510	482	112	74	60	216	168	100	96	42	204	118	108	140	190	168	122	706	912	976	340	758	538	180	162	194	192	180	198	11916	4-methoxybenzoate monooxygenase (O-demethylating) [EC:1.14.99.15]	http://www.genome.jp/dbget-bin/www_bget?ko:K22553	518	82	137.667	141	705	184.333
K22085	186	154	186	174	244	140	214	176	182	168	116	94	250	158	146	140	138	114	90	96	152	142	150	116	150	148	132	102	220	184	136	138	144	202	260	190	5732	methylglutamate dehydrogenase subunit B [EC:1.5.99.5]	http://www.genome.jp/dbget-bin/www_bget?ko:K22085	184	126	157.667	124.333	156	178.333
K16515	706	662	828	708	772	648	900	910	922	140	114	144	456	262	220	254	126	324	148	92	128	108	216	210	126	146	150	162	164	188	164	174	144	160	226	190	11992	4-oxalomesaconate hydratase [EC:4.2.1.83]	http://www.genome.jp/dbget-bin/www_bget?ko:K16515	784	132.667	273.667	150.333	156	176.333
K14338	230	232	198	254	296	190	242	236	188	64	38	46	120	146	94	112	128	146	148	116	128	160	82	102	100	112	146	50	118	122	162	142	176	146	246	178	5394	cytochrome P450 / NADPH-cytochrome P450 reductase [EC:1.14.14.1 1.6.2.4]	http://www.genome.jp/dbget-bin/www_bget?ko:K14338	229.556	49.3333	124.333	122.667	108	175
K05709	62	78	102	82	92	62	72	82	106	0	0	0	18	26	10	2	0	24	20	14	26	12	12	16	48	52	68	30	60	40	14	18	120	128	558	202	2256	3-phenylpropionate/trans-cinnamate dioxygenase subunit beta [EC:1.14.12.19]	http://www.genome.jp/dbget-bin/www_bget?ko:K05709	82	0	13.3333	16.6667	49.6667	173.333
K16792	126	172	196	170	182	274	188	198	170	54	72	84	306	192	126	460	502	332	112	102	118	144	52	110	378	376	370	426	242	438	164	128	156	214	200	178	7712	methanogen homoaconitase large subunit [EC:4.2.1.114]	http://www.genome.jp/dbget-bin/www_bget?ko:K16792	186.222	70	319.667	106.333	371.667	173.333
K16243	32	34	32	20	20	52	26	18	26	16	30	12	128	72	98	90	124	110	38	28	42	40	50	44	44	80	64	50	66	42	134	160	160	196	238	144	2560	phenol/toluene 2-monooxygenase (NADH) P1/A1 [EC:1.14.13.244 1.14.13.243]	http://www.genome.jp/dbget-bin/www_bget?ko:K16243	28.8889	19.3333	103.667	40.3333	57.6667	172
K08093	264	204	194	304	286	220	242	242	254	164	124	162	438	278	206	290	196	192	106	126	136	150	78	52	200	168	148	156	148	194	182	134	116	188	200	198	6940	3-hexulose-6-phosphate synthase [EC:4.1.2.43]	http://www.genome.jp/dbget-bin/www_bget?ko:K08093	245.556	150	266.667	108	169	169.667
K10946	304	232	300	322	412	248	280	272	242	74	84	74	150	90	84	108	78	176	40	38	48	6	128	146	6	8	4	4	6	8	206	104	174	204	170	146	4976	methane/ammonia monooxygenase subunit C	http://www.genome.jp/dbget-bin/www_bget?ko:K10946	290.222	77.3333	114.333	67.6667	6	167.333
K01253	340	290	328	300	376	258	362	426	358	150	160	92	150	168	86	114	56	130	90	80	134	106	188	208	116	78	46	104	104	114	180	152	136	160	214	154	6508	microsomal epoxide hydrolase [EC:3.3.2.9]	http://www.genome.jp/dbget-bin/www_bget?ko:K01253	337.556	134	117.333	134.333	93.6667	166
K15066	1246	1292	1558	1440	1556	1440	1544	1632	1620	460	252	444	898	444	424	362	108	626	188	164	206	308	288	320	478	618	590	312	450	518	188	122	166	172	172	164	22770	vanillate/3-O-methylgallate O-demethylase [EC:2.1.1.341]	http://www.genome.jp/dbget-bin/www_bget?ko:K15066	1480.89	385.333	477	245.667	494.333	164
K07537	490	454	480	586	582	584	652	698	508	468	366	426	272	234	156	166	156	214	256	204	246	70	284	276	536	510	364	834	466	946	166	162	142	174	140	186	13454	cyclohexa-1,5-dienecarbonyl-CoA hydratase [EC:4.2.1.100]	http://www.genome.jp/dbget-bin/www_bget?ko:K07537	559.333	420	199.667	222.667	609.333	161.667
K01826	292	218	282	272	398	346	298	296	254	46	54	28	182	134	100	106	56	126	46	30	42	62	44	88	172	176	150	174	202	244	136	112	124	120	320	146	5876	5-carboxymethyl-2-hydroxymuconate isomerase [EC:5.3.3.10]	http://www.genome.jp/dbget-bin/www_bget?ko:K01826	295.111	42.6667	117.333	52	186.333	159.667
K11947	272	228	342	240	306	250	272	310	334	28	26	58	154	78	58	50	8	100	52	64	92	110	42	30	172	164	170	102	158	114	188	138	140	148	180	160	5338	aldehyde dehydrogenase [EC:1.2.1.-]	http://www.genome.jp/dbget-bin/www_bget?ko:K11947	283.778	37.3333	74.6667	65	146.667	159
K22015	262	172	234	262	304	172	244	246	234	256	238	220	386	276	206	264	152	156	120	90	152	124	156	100	126	122	182	106	164	174	132	152	158	162	180	170	6854	formate dehydrogenase (hydrogenase) [EC:1.17.98.4 1.17.98.-]	http://www.genome.jp/dbget-bin/www_bget?ko:K22015	236.667	238	240	123.667	145.667	159
K10621	342	276	318	300	324	264	368	352	304	52	116	46	476	228	202	166	164	112	134	70	136	124	110	86	230	266	324	182	252	312	170	160	134	154	152	174	7580	2,3-dihydroxy-p-cumate/2,3-dihydroxybenzoate 3,4-dioxygenase [EC:1.13.11.- 1.13.11.14]	http://www.genome.jp/dbget-bin/www_bget?ko:K10621	316.444	71.3333	224.667	110	261	157.333
K20625	260	236	328	350	388	408	388	454	322	232	146	198	174	124	110	78	100	122	402	356	384	370	234	154	484	466	552	544	460	678	166	180	176	116	136	152	10428	acetylene hydratase [EC:4.2.1.112]	http://www.genome.jp/dbget-bin/www_bget?ko:K20625	348.222	192	118	316.667	530.667	154.333
K10619	170	100	120	138	96	72	110	110	98	150	126	96	204	96	96	152	138	78	102	46	104	66	92	68	316	304	232	208	316	306	178	164	192	124	144	112	5224	p-cumate 2,3-dioxygenase subunit alpha [EC:1.14.12.25]	http://www.genome.jp/dbget-bin/www_bget?ko:K10619	112.667	124	127.333	79.6667	280.333	152.333
K04115	452	360	438	468	478	362	656	646	492	858	470	632	336	268	264	216	216	220	122	58	84	62	204	304	178	168	138	252	124	230	150	188	136	142	148	140	10660	benzoyl-CoA reductase subunit D [EC:1.3.7.8]	http://www.genome.jp/dbget-bin/www_bget?ko:K04115	483.556	653.333	253.333	139	181.667	150.667
K00022	126	84	78	114	142	104	102	122	116	122	82	130	70	62	90	58	134	58	74	96	86	72	72	78	346	332	276	436	290	464	148	114	108	136	206	178	5306	3-hydroxyacyl-CoA dehydrogenase [EC:1.1.1.35]	http://www.genome.jp/dbget-bin/www_bget?ko:K00022	109.778	111.333	78.6667	79.6667	357.333	148.333
K00399	26	20	30	18	22	20	36	44	10	124	96	102	268	242	196	766	674	430	4	8	10	28	10	8	2	4	2	12	4	28	156	146	116	162	164	140	4128	methyl-coenzyme M reductase alpha subunit [EC:2.8.4.1]	http://www.genome.jp/dbget-bin/www_bget?ko:K00399	25.1111	107.333	429.333	11.3333	8.66667	147.333
K00141	350	364	578	396	332	388	438	422	462	264	208	298	360	212	188	192	84	296	26	22	44	44	92	78	326	374	362	224	270	350	160	112	118	132	228	112	8906	benzaldehyde dehydrogenase (NAD) [EC:1.2.1.28]	http://www.genome.jp/dbget-bin/www_bget?ko:K00141	414.444	256.667	222	51	317.667	143.667
K23526	72	62	60	66	58	56	88	76	72	34	44	24	124	88	54	50	32	52	54	48	46	134	56	52	44	28	34	12	28	32	142	140	108	172	156	124	2522	aromatic O-demethylase, cytochrome P450 subunit [EC:1.14.14.-]	http://www.genome.jp/dbget-bin/www_bget?ko:K23526	67.7778	34	66.6667	65	29.6667	140.333
K00400	12	16	30	20	36	34	16	22	12	64	62	60	226	166	96	592	688	394	0	0	4	0	4	0	0	2	0	0	2	0	146	118	110	192	176	98	3398	methyl coenzyme M reductase system, component A2	http://www.genome.jp/dbget-bin/www_bget?ko:K00400	22	62	360.333	1.33333	0.666667	140
K06914	180	166	190	210	252	138	170	126	160	80	90	98	348	176	148	392	334	332	72	58	86	90	190	124	116	108	118	118	136	200	108	102	138	168	174	130	5826	tyramine---L-glutamate ligase [EC:6.3.4.24]	http://www.genome.jp/dbget-bin/www_bget?ko:K06914	176.889	89.3333	288.333	103.333	132.667	136.667
K05599	58	60	66	80	102	74	64	58	96	38	12	18	30	16	4	14	4	54	8	28	6	30	20	20	34	30	38	12	24	24	44	40	66	144	406	108	1930	anthranilate 1,2-dioxygenase (deaminating, decarboxylating) large subunit [EC:1.14.12.1]	http://www.genome.jp/dbget-bin/www_bget?ko:K05599	73.1111	22.6667	20.3333	18.6667	27	134.667
K10714	362	296	280	336	470	282	384	358	354	144	134	140	226	134	114	148	94	162	102	92	136	120	142	130	150	140	98	142	160	222	128	114	124	138	140	150	6846	methylene-tetrahydromethanopterin dehydrogenase [EC:1.5.1.-]	http://www.genome.jp/dbget-bin/www_bget?ko:K10714	346.889	139.333	146.333	120.333	152	132.333
K04100	354	328	334	318	362	308	370	416	392	206	206	200	314	214	194	168	170	144	42	52	72	130	212	128	306	316	388	200	384	308	124	132	146	134	136	120	8328	protocatechuate 4,5-dioxygenase, alpha chain [EC:1.13.11.8]	http://www.genome.jp/dbget-bin/www_bget?ko:K04100	353.556	204	200.667	106	317	132
K07508	158	128	124	188	184	128	214	194	178	220	116	176	126	236	176	64	100	178	42	64	74	32	122	80	128	168	92	118	150	206	158	112	118	120	160	106	4938	acetyl-CoA acyltransferase 2 [EC:2.3.1.16]	http://www.genome.jp/dbget-bin/www_bget?ko:K07508	166.222	170.667	146.667	69	143.667	129
K19516	84	72	74	96	112	138	78	106	134	164	150	176	34	96	80	30	32	74	202	224	258	80	122	86	376	362	326	812	404	760	108	144	112	132	122	140	6500	benzoyl-CoA reductase subunit BamC [EC:1.3.-.-]	http://www.genome.jp/dbget-bin/www_bget?ko:K19516	99.3333	163.333	57.6667	162	506.667	126.333
K08265	64	68	100	148	126	156	84	102	82	72	50	58	64	76	62	118	144	114	312	190	198	200	114	126	618	588	536	530	412	678	116	132	120	124	120	140	6942	heterodisulfide reductase subunit E [EC:1.8.98.1]	http://www.genome.jp/dbget-bin/www_bget?ko:K08265	103.333	60	96.3333	190	560.333	125.333
K00699	138	98	156	154	182	152	148	174	188	126	62	80	234	184	150	126	126	102	90	44	90	78	58	68	102	102	88	162	98	150	126	136	92	142	120	130	4456	glucuronosyltransferase [EC:2.4.1.17]	http://www.genome.jp/dbget-bin/www_bget?ko:K00699	154.444	89.3333	153.667	71.3333	117	124.333
K16319	140	206	188	178	206	150	176	218	176	46	80	22	200	166	114	110	86	72	116	92	178	146	126	76	296	274	374	216	272	260	132	142	150	84	108	104	5680	anthranilate 1,2-dioxygenase large subunit [EC:1.14.12.1]	http://www.genome.jp/dbget-bin/www_bget?ko:K16319	182	49.3333	124.667	122.333	282	120
K17067	38	34	44	34	38	64	50	48	42	14	10	28	10	18	12	46	6	60	26	24	46	30	34	32	102	106	132	122	68	102	136	80	116	118	164	82	2116	formaldehyde dismutase / methanol dehydrogenase [EC:1.2.98.1 1.1.99.37]	http://www.genome.jp/dbget-bin/www_bget?ko:K17067	43.5556	17.3333	25.3333	32	105.333	116
K01034	60	62	54	106	100	112	80	118	156	42	54	56	138	68	46	92	162	84	86	86	112	54	110	94	278	248	284	472	246	470	102	118	106	124	114	130	4824	acetate CoA/acetoacetate CoA-transferase alpha subunit [EC:2.8.3.8 2.8.3.9]	http://www.genome.jp/dbget-bin/www_bget?ko:K01034	94.2222	50.6667	98.3333	90.3333	333	115.667
K00171	190	184	212	268	232	234	298	450	280	160	162	204	130	118	106	208	334	240	166	144	154	56	92	22	114	100	130	178	88	140	116	96	108	120	112	136	6082	pyruvate ferredoxin oxidoreductase delta subunit [EC:1.2.7.1]	http://www.genome.jp/dbget-bin/www_bget?ko:K00171	260.889	175.333	189.333	105.667	125	114.667
K04480	108	98	76	110	146	150	110	110	86	96	70	106	338	176	172	498	674	324	82	82	62	26	38	26	322	292	290	378	240	428	84	124	142	132	90	104	6390	methanol---5-hydroxybenzimidazolylcobamide Co-methyltransferase [EC:2.1.1.90]	http://www.genome.jp/dbget-bin/www_bget?ko:K04480	110.444	90.6667	363.667	52.6667	325	112.667
K13299	120	144	154	168	166	144	124	136	146	200	150	150	140	96	148	188	132	122	66	78	64	160	102	110	86	104	110	76	98	106	106	90	102	134	142	90	4452	glutathione S-transferase kappa 1 [EC:2.5.1.18]	http://www.genome.jp/dbget-bin/www_bget?ko:K13299	144.667	166.667	137.667	96.6667	96.6667	110.667
K00203	88	36	78	96	58	80	76	90	62	66	68	64	198	206	106	404	302	274	54	58	46	60	54	60	118	126	118	92	74	138	106	92	94	122	114	134	4012	formylmethanofuran dehydrogenase subunit D [EC:1.2.7.12]	http://www.genome.jp/dbget-bin/www_bget?ko:K00203	73.7778	66	248.333	55.3333	111	110.333
K00584	74	78	132	128	94	190	80	126	110	130	76	106	190	194	158	362	388	292	202	136	126	84	96	68	240	182	154	280	136	374	106	112	100	112	96	130	5642	tetrahydromethanopterin S-methyltransferase subunit H [EC:2.1.1.86]	http://www.genome.jp/dbget-bin/www_bget?ko:K00584	112.444	104	264	118.667	227.667	109.333
K07543	580	458	644	666	750	418	718	674	554	192	118	156	190	202	132	112	32	216	176	92	134	104	150	108	306	370	390	246	314	366	110	76	98	104	114	136	10206	benzylsuccinate CoA-transferase BbsE subunit [EC:2.8.3.15]	http://www.genome.jp/dbget-bin/www_bget?ko:K07543	606.889	155.333	147.333	127.333	332	106.333
K25933	422	488	514	472	524	370	502	526	440	224	188	146	258	174	158	136	184	200	116	118	94	28	90	74	242	178	124	366	228	404	110	90	144	110	92	76	8610	phenyl-phosphate phosphatase/carboxylase subunit beta [EC:4.1.1.123]	http://www.genome.jp/dbget-bin/www_bget?ko:K25933	473.111	186	185	86.6667	257	103.667
K25936	106	134	100	150	154	150	400	308	234	104	108	114	50	88	44	118	124	96	64	50	86	38	74	52	102	92	106	134	138	150	98	102	66	124	106	110	4274	phenol phosphorylase subunit alpha [EC:2.7.1.238]	http://www.genome.jp/dbget-bin/www_bget?ko:K25936	192.889	108.667	86.6667	60.6667	120.333	101
K14581	176	126	138	156	148	142	110	150	160	34	44	32	198	130	106	196	148	88	32	34	20	20	38	52	10	16	24	4	4	16	74	118	100	110	98	96	3148	naphthalene 1,2-dioxygenase ferredoxin reductase component [EC:1.18.1.7]	http://www.genome.jp/dbget-bin/www_bget?ko:K14581	145.111	36.6667	144.333	32.6667	12.3333	99.3333
K07509	4	10	4	6	8	6	0	10	10	54	50	70	452	280	218	224	218	122	60	88	82	62	40	26	100	98	108	64	112	162	88	80	100	110	126	84	3336	acetyl-CoA acyltransferase [EC:2.3.1.16]	http://www.genome.jp/dbget-bin/www_bget?ko:K07509	6.44444	58	252.333	59.6667	107.333	98
K07821	60	52	108	128	50	168	70	102	64	52	34	74	82	46	38	78	104	40	128	116	90	54	94	42	222	174	168	190	246	292	114	106	84	78	86	120	3754	trimethylamine-N-oxide reductase (cytochrome c), cytochrome c-type subunit TorY	http://www.genome.jp/dbget-bin/www_bget?ko:K07821	89.1111	53.3333	64.6667	87.3333	215.333	98
K00863	190	174	154	186	306	108	202	188	194	74	60	82	274	110	164	46	64	80	84	68	78	172	124	64	44	78	42	32	108	66	88	94	92	90	136	82	4198	triose/dihydroxyacetone kinase / FAD-AMP lyase (cyclizing) [EC:2.7.1.28 2.7.1.29 4.6.1.15]	http://www.genome.jp/dbget-bin/www_bget?ko:K00863	189.111	72	123	98.3333	61.6667	97
K15063	668	670	714	824	840	686	788	948	718	134	120	228	238	188	122	90	16	174	52	30	60	48	126	130	222	236	204	170	228	226	62	108	82	98	110	114	10472	5-carboxyvanillate decarboxylase	http://www.genome.jp/dbget-bin/www_bget?ko:K15063	761.778	160.667	138	74.3333	214.333	95.6667
K15228	114	104	164	128	160	108	106	104	108	102	58	96	252	154	104	194	182	118	58	38	84	52	80	96	86	114	108	88	130	112	112	102	122	88	52	88	3966	methylamine dehydrogenase light chain [EC:1.4.9.1]	http://www.genome.jp/dbget-bin/www_bget?ko:K15228	121.778	85.3333	167.333	68	106.333	94
K20199	20	28	12	18	14	38	28	26	16	42	30	26	36	4	12	0	2	2	76	68	44	32	56	12	66	50	36	16	30	56	44	34	38	48	318	68	1446	4-hydroxybenzaldehyde dehydrogenase (NADP+) [EC:1.2.1.96]	http://www.genome.jp/dbget-bin/www_bget?ko:K20199	22.2222	32.6667	9.33333	48	42.3333	91.6667
K15760	38	16	24	12	26	8	4	10	18	2	24	0	2	2	0	2	8	0	0	0	0	0	0	2	0	0	2	0	0	0	88	76	78	124	116	66	748	toluene monooxygenase system protein A [EC:1.14.13.236 1.14.13.-]	http://www.genome.jp/dbget-bin/www_bget?ko:K15760	17.3333	8.66667	2.33333	0.333333	0.333333	91.3333
K01035	56	54	104	124	90	138	74	110	122	38	34	24	84	54	40	122	164	62	56	44	44	60	56	48	144	190	204	242	202	252	84	106	60	90	100	104	3580	acetate CoA/acetoacetate CoA-transferase beta subunit [EC:2.8.3.8 2.8.3.9]	http://www.genome.jp/dbget-bin/www_bget?ko:K01035	96.8889	32	87.6667	51.3333	205.667	90.6667
K10945	174	98	120	142	184	128	126	162	126	32	54	40	74	64	44	104	208	98	38	2	24	4	116	152	0	2	2	0	4	2	110	102	82	94	82	70	2864	methane/ammonia monooxygenase subunit B	http://www.genome.jp/dbget-bin/www_bget?ko:K10945	140	42	98.6667	56	1.66667	90
K15762	96	140	84	104	84	104	98	72	78	22	26	32	72	48	48	52	54	58	88	50	84	98	134	86	58	82	76	60	90	76	98	76	76	114	92	84	2794	toluene monooxygenase system ferredoxin subunit	http://www.genome.jp/dbget-bin/www_bget?ko:K15762	95.5556	26.6667	55.3333	90	73.6667	90
K00205	8	30	12	22	32	34	10	28	22	168	56	118	240	200	138	552	594	386	48	42	90	28	20	2	82	72	50	190	64	190	98	68	70	118	96	88	4066	4Fe-4S ferredoxin	http://www.genome.jp/dbget-bin/www_bget?ko:K00205	22	114	351.667	38.3333	108	89.6667
K22363	12	10	20	22	22	26	6	48	26	2	6	2	6	18	10	16	4	12	0	0	0	0	0	0	0	0	0	2	0	0	92	58	90	114	94	82	800	2-hydroxypropyl-CoM lyase [EC:4.4.1.23]	http://www.genome.jp/dbget-bin/www_bget?ko:K22363	21.3333	3.33333	11	0	0.333333	88.3333
K09478	442	348	448	354	474	274	604	588	404	350	200	234	194	196	92	84	98	136	128	128	118	230	218	154	112	84	100	108	146	104	78	74	90	90	100	96	7678	short-chain 2-methylacyl-CoA dehydrogenase [EC:1.3.8.5]	http://www.genome.jp/dbget-bin/www_bget?ko:K09478	437.333	261.333	133.333	162.667	109	88
K11945	266	256	268	274	408	262	304	258	362	96	128	88	200	96	104	48	44	80	40	30	70	56	50	24	40	46	46	28	42	44	108	94	66	90	80	82	4578	extradiol dioxygenase [EC:1.13.11.-]	http://www.genome.jp/dbget-bin/www_bget?ko:K11945	295.333	104	95.3333	45	41	86.6667
K00401	20	14	16	16	24	32	6	16	18	90	54	66	188	136	98	414	396	338	2	0	4	0	2	2	0	0	2	0	0	10	74	84	70	122	84	82	2480	methyl-coenzyme M reductase beta subunit [EC:2.8.4.1]	http://www.genome.jp/dbget-bin/www_bget?ko:K00401	18	70	261.667	1.66667	2	86
K04099	434	512	692	530	754	510	652	546	736	42	66	80	206	114	138	84	8	172	62	32	58	58	82	58	182	246	172	172	124	238	58	62	74	66	170	74	8264	gallate dioxygenase [EC:1.13.11.57]	http://www.genome.jp/dbget-bin/www_bget?ko:K04099	596.222	62.6667	120.333	58.3333	189	84
K16161	0	0	4	8	2	2	0	4	0	0	0	0	2	8	10	16	2	10	18	8	18	22	16	0	16	12	26	20	6	30	84	60	92	98	92	70	756	methane monooxygenase component C [EC:1.14.13.25]	http://www.genome.jp/dbget-bin/www_bget?ko:K16161	2.22222	0	8	13.6667	18.3333	82.6667
K11781	328	248	288	336	314	246	264	246	244	98	84	82	258	188	204	632	576	440	272	210	198	322	332	392	48	30	48	42	88	90	68	88	70	76	108	84	7642	5-amino-6-(D-ribitylamino)uracil---L-tyrosine 4-hydroxyphenyl transferase [EC:2.5.1.147]	http://www.genome.jp/dbget-bin/www_bget?ko:K11781	279.333	88	383	287.667	57.6667	82.3333
K00442	118	106	182	170	230	248	156	210	190	76	62	72	98	62	60	154	116	128	70	48	38	42	28	12	66	66	74	34	60	96	58	80	64	96	84	90	3544	coenzyme F420 hydrogenase subunit delta	http://www.genome.jp/dbget-bin/www_bget?ko:K00442	178.889	70	103	39.6667	66	78.6667
K15756	122	90	78	70	78	40	76	98	72	46	16	18	50	34	20	42	22	44	86	88	44	92	46	76	122	106	136	160	160	160	104	64	86	62	104	46	2758	2-hydroxy-6-oxo-6-(2'-aminophenyl)hexa-2,4-dienoate hydrolase [EC:3.7.1.13]	http://www.genome.jp/dbget-bin/www_bget?ko:K15756	80.4444	26.6667	35.3333	72	140.667	77.6667
K10222	82	54	80	76	74	92	104	88	100	108	70	80	86	48	60	34	28	48	58	50	84	66	32	38	290	264	220	208	142	268	86	66	60	74	80	90	3488	2,6-dioxo-6-phenylhexa-3-enoate hydrolase [EC:3.7.1.8]	http://www.genome.jp/dbget-bin/www_bget?ko:K10222	83.3333	86	50.6667	54.6667	232	76
K10977	384	386	358	438	552	334	394	518	358	494	200	360	234	204	130	356	386	328	136	124	88	122	90	152	166	130	122	364	212	374	74	64	54	78	104	78	8946	methanogen homocitrate synthase [EC:2.3.3.14 2.3.3.-]	http://www.genome.jp/dbget-bin/www_bget?ko:K10977	413.556	351.333	273	118.667	228	75.3333
K00462	402	336	384	392	358	384	428	386	284	44	24	38	136	112	104	118	140	142	48	62	86	106	70	52	134	116	78	64	124	94	68	60	68	68	108	72	5690	biphenyl-2,3-diol 1,2-dioxygenase [EC:1.13.11.39]	http://www.genome.jp/dbget-bin/www_bget?ko:K00462	372.667	35.3333	125.333	70.6667	101.667	74
K16793	78	48	36	46	52	72	38	44	62	18	22	12	136	84	74	228	182	114	38	14	40	20	32	22	126	106	100	80	78	124	80	76	66	70	66	80	2564	methanogen homoaconitase small subunit [EC:4.2.1.114]	http://www.genome.jp/dbget-bin/www_bget?ko:K16793	52.8889	17.3333	136.333	27.6667	102.333	73
K15056	28	30	52	24	56	30	40	38	24	234	120	118	92	72	118	58	40	72	56	38	42	36	72	96	42	30	24	20	26	22	76	52	74	80	80	74	2186	2-hydroxylaminobenzoate mutase [EC:5.4.99.-]	http://www.genome.jp/dbget-bin/www_bget?ko:K15056	35.7778	157.333	75.3333	56.6667	27.3333	72.6667
K15514	290	234	250	288	360	226	364	354	274	154	92	130	124	174	218	130	76	106	50	24	82	56	202	164	118	64	70	54	92	108	58	56	82	56	80	94	5354	3,4-dehydroadipyl-CoA semialdehyde dehydrogenase [EC:1.2.1.77]	http://www.genome.jp/dbget-bin/www_bget?ko:K15514	293.333	125.333	138	96.3333	84.3333	71
K10701	202	232	254	274	296	208	428	412	338	120	90	114	60	28	38	20	2	54	138	136	170	58	58	42	188	144	142	152	104	138	48	76	56	58	70	104	5052	acetophenone carboxylase [EC:6.4.1.8]	http://www.genome.jp/dbget-bin/www_bget?ko:K10701	293.778	108	33.6667	100.333	144.667	68.6667
K04097	422	294	380	316	488	302	328	312	352	348	316	252	384	276	152	232	172	198	208	148	258	208	240	160	306	338	338	258	332	416	74	88	58	62	56	70	9142	prostaglandin-H2 D-isomerase / glutathione transferase [EC:5.3.99.2 2.5.1.18]	http://www.genome.jp/dbget-bin/www_bget?ko:K04097	354.889	305.333	235.667	203.667	331.333	68
K11311	28	48	26	30	48	22	26	44	36	0	0	0	2	4	4	8	2	10	28	38	36	40	48	42	88	56	70	44	74	54	18	20	32	76	226	34	1362	anthranilate 1,2-dioxygenase reductase component [EC:1.18.1.-]	http://www.genome.jp/dbget-bin/www_bget?ko:K11311	34.2222	0	5	38.6667	64.3333	67.6667
K00126	54	56	28	64	78	30	38	54	70	48	24	32	60	36	58	22	28	34	10	22	6	22	36	20	22	38	40	40	38	58	76	64	48	78	76	60	1568	formate dehydrogenase subunit delta [EC:1.17.1.9]	http://www.genome.jp/dbget-bin/www_bget?ko:K00126	52.4444	34.6667	39.6667	19.3333	39.3333	67
K00192	44	34	38	58	30	76	32	66	44	110	34	96	240	180	106	604	576	474	34	10	20	10	2	4	128	120	78	130	64	190	56	64	48	108	64	58	4030	anaerobic carbon-monoxide dehydrogenase, CODH/ACS complex subunit alpha [EC:1.2.7.4]	http://www.genome.jp/dbget-bin/www_bget?ko:K00192	46.8889	80	363.333	13.3333	118.333	66.3333
K03464	56	52	60	44	56	38	54	54	26	8	6	0	60	20	36	34	12	52	12	8	4	14	20	14	10	20	10	8	6	18	16	8	32	38	238	66	1210	muconolactone D-isomerase [EC:5.3.3.4]	http://www.genome.jp/dbget-bin/www_bget?ko:K03464	48.8889	4.66667	35.6667	12	12	66.3333
K00918	14	14	28	24	32	22	14	0	6	18	12	20	170	140	98	328	450	304	32	28	26	50	18	12	80	42	48	26	70	54	64	68	66	64	68	56	2566	ADP-dependent phosphofructokinase/glucokinase [EC:2.7.1.146 2.7.1.147]	http://www.genome.jp/dbget-bin/www_bget?ko:K00918	17.1111	16.6667	248.333	27.6667	53.3333	64.3333
K14578	94	104	114	132	136	118	134	128	128	62	32	26	114	76	100	94	66	90	72	58	74	74	60	26	74	48	76	98	62	72	58	66	46	66	88	54	2920	naphthalene 1,2-dioxygenase ferredoxin component	http://www.genome.jp/dbget-bin/www_bget?ko:K14578	120.889	40	90	60.6667	71.6667	63
K00084	38	30	34	76	54	50	122	108	94	2	10	14	26	26	4	38	28	46	52	30	38	20	38	14	80	66	110	54	68	100	68	64	72	52	70	50	1846	carbonyl reductase 3 [EC:1.1.1.184]	http://www.genome.jp/dbget-bin/www_bget?ko:K00084	67.3333	8.66667	28	32	79.6667	62.6667
K15758	4	26	34	26	36	12	12	12	50	56	34	40	60	44	22	46	82	62	4	12	20	60	2	4	8	4	6	10	10	16	86	72	68	32	34	62	1168	toluene methyl-monooxygenase electron transfer component [EC:1.18.1.3]	http://www.genome.jp/dbget-bin/www_bget?ko:K15758	23.5556	43.3333	52.6667	17	9	59
K15237	58	76	118	80	66	82	116	148	160	44	58	20	112	74	86	102	80	72	48	46	60	146	40	34	86	78	90	78	86	102	60	66	48	42	82	48	2792	2,5-dichloro-2,5-cyclohexadiene-1,4-diol dehydrogenase 1 [EC:1.3.1.-]	http://www.genome.jp/dbget-bin/www_bget?ko:K15237	100.444	40.6667	87.6667	62.3333	86.6667	57.6667
K25937	48	52	56	62	64	56	46	84	60	26	34	36	44	56	24	50	54	66	236	116	104	72	102	108	94	82	86	138	76	170	44	74	64	54	58	50	2646	phenol phosphorylase subunit beta [EC:2.7.1.238]	http://www.genome.jp/dbget-bin/www_bget?ko:K25937	58.6667	32	49	123	107.667	57.3333
K10944	86	68	90	70	74	18	70	76	100	48	40	20	48	102	158	108	174	70	16	12	4	2	44	108	0	0	0	2	0	0	54	54	38	52	50	84	1940	methane/ammonia monooxygenase subunit A [EC:1.14.18.3 1.14.99.39]	http://www.genome.jp/dbget-bin/www_bget?ko:K10944	72.4444	36	110	31	0.333333	55.3333
K13812	8	10	30	32	6	28	40	12	20	70	66	76	64	112	84	258	290	236	24	10	60	36	22	18	68	22	32	134	52	192	64	46	54	52	42	50	2420	bifunctional enzyme Fae/Hps [EC:4.2.1.147 4.1.2.43]	http://www.genome.jp/dbget-bin/www_bget?ko:K13812	20.6667	70.6667	174	28.3333	83.3333	51.3333
K14750	56	20	32	54	34	48	46	70	38	14	18	16	24	26	18	16	14	50	6	8	2	6	10	0	48	54	64	32	42	74	42	54	48	46	62	54	1246	ethylbenzene dioxygenase ferredoxin component	http://www.genome.jp/dbget-bin/www_bget?ko:K14750	44.2222	16	24.6667	5.33333	52.3333	51
K16245	2	0	6	4	10	4	6	4	8	16	14	6	32	10	38	62	34	26	12	6	4	16	26	4	26	44	30	24	36	18	48	50	52	60	58	36	832	phenol/toluene 2-monooxygenase (NADH) P4/A4 [EC:1.14.13.244 1.14.13.243]	http://www.genome.jp/dbget-bin/www_bget?ko:K16245	4.88889	12	33.6667	11.3333	29.6667	50.6667
K00440	2	4	10	4	8	6	2	4	2	32	18	48	78	56	36	200	188	142	0	0	0	0	0	0	0	0	0	2	0	12	74	58	38	58	28	46	1156	coenzyme F420 hydrogenase subunit alpha [EC:1.12.98.1]	http://www.genome.jp/dbget-bin/www_bget?ko:K00440	4.66667	32.6667	116.667	0	2.33333	50.3333
K00443	2	2	4	0	4	4	6	4	0	58	26	38	64	52	38	130	160	108	0	4	2	2	0	6	6	0	4	6	4	14	62	28	32	54	60	66	1050	coenzyme F420 hydrogenase subunit gamma [EC:1.12.98.1]	http://www.genome.jp/dbget-bin/www_bget?ko:K00443	2.88889	40.6667	92	2.33333	5.66667	50.3333
K25528	76	58	82	70	46	106	48	90	78	20	34	24	122	108	60	144	136	80	84	40	82	12	30	6	14	38	28	18	12	22	30	56	40	46	82	44	2066	phosphoserine phosphatase [EC:3.1.3.3]	http://www.genome.jp/dbget-bin/www_bget?ko:K25528	72.6667	26	108.333	42.3333	22	49.6667
K07511	170	156	134	136	138	100	128	156	138	24	16	28	90	42	42	36	8	70	60	70	38	48	64	68	56	70	72	58	92	72	46	38	62	52	64	32	2674	enoyl-CoA hydratase [EC:4.2.1.17]	http://www.genome.jp/dbget-bin/www_bget?ko:K07511	139.556	22.6667	48	58	70	49
K00189	54	30	82	82	64	78	66	54	52	186	84	110	24	50	36	16	32	24	42	40	60	48	30	12	166	154	148	446	260	400	38	52	52	48	54	44	3218	2-oxoisovalerate/pyruvate ferredoxin oxidoreductase gamma subunit [EC:1.2.7.7 1.2.7.1]	http://www.genome.jp/dbget-bin/www_bget?ko:K00189	62.4444	126.667	30.3333	38.6667	262.333	48
K07515	46	38	24	32	44	6	30	30	48	22	12	10	56	32	66	54	64	54	26	10	14	10	2	10	22	22	24	34	28	60	26	48	36	72	78	24	1214	enoyl-CoA hydratase / long-chain 3-hydroxyacyl-CoA dehydrogenase [EC:4.2.1.17 1.1.1.211]	http://www.genome.jp/dbget-bin/www_bget?ko:K07515	33.1111	14.6667	54.3333	12	31.6667	47.3333
K15764	20	20	0	14	8	6	10	12	8	0	0	2	0	8	0	0	0	0	2	0	0	0	0	0	0	0	0	0	0	0	24	36	52	72	60	34	388	toluene monooxygenase system protein E [EC:1.14.13.236 1.14.13.-]	http://www.genome.jp/dbget-bin/www_bget?ko:K15764	10.8889	0.666667	1.33333	0.333333	0	46.3333
K07549	6	4	6	6	8	2	14	2	0	4	20	30	16	4	4	8	0	2	0	0	2	2	0	0	0	0	2	2	6	0	50	50	40	50	48	36	424	benzoylsuccinyl-CoA thiolase BbsA subunit [EC:2.3.1.310]	http://www.genome.jp/dbget-bin/www_bget?ko:K07549	5.33333	18	5.66667	0.666667	1.66667	45.6667
K11780	254	146	158	206	236	118	96	172	174	32	24	60	144	128	74	276	252	268	134	136	88	278	236	312	32	6	14	20	32	40	42	44	40	52	32	52	4408	7,8-didemethyl-8-hydroxy-5-deazariboflavin synthase [EC:4.3.1.32]	http://www.genome.jp/dbget-bin/www_bget?ko:K11780	173.333	38.6667	190.333	197.333	24	43.6667
K22481	12	4	14	14	8	20	18	10	24	12	44	26	50	62	42	168	212	124	6	2	0	2	0	0	0	16	4	10	4	30	20	54	44	40	56	42	1194	heterodisulfide reductase subunit B1 [EC:1.8.7.3]	http://www.genome.jp/dbget-bin/www_bget?ko:K22481	13.7778	27.3333	109.667	1.66667	10.6667	42.6667
K22960	40	20	28	46	30	34	26	40	26	52	10	30	66	76	74	126	94	110	90	42	46	40	20	12	106	74	46	234	82	206	30	62	26	48	30	54	2176	gallate decarboxylase subunit D	http://www.genome.jp/dbget-bin/www_bget?ko:K22960	32.2222	30.6667	91	41.6667	124.667	41.6667
K10527	18	12	22	30	32	20	16	22	28	2	10	8	20	34	20	8	14	18	12	28	16	30	10	2	50	18	60	20	16	42	20	36	54	52	50	36	886	enoyl-CoA hydratase/3-hydroxyacyl-CoA dehydrogenase [EC:4.2.1.17 1.1.1.35 1.1.1.211]	http://www.genome.jp/dbget-bin/www_bget?ko:K10527	22.2222	6.66667	19	16.3333	34.3333	41.3333
K10978	16	26	46	52	52	38	44	30	44	20	12	56	122	106	80	336	354	202	28	22	24	30	14	6	104	118	116	126	92	130	42	36	38	46	58	28	2694	methanogen homoisocitrate dehydrogenase [EC:1.1.1.87 1.1.1.-]	http://www.genome.jp/dbget-bin/www_bget?ko:K10978	38.6667	29.3333	200	20.6667	114.333	41.3333
K18293	4	4	8	0	2	4	4	8	0	70	18	28	0	2	4	8	8	4	2	0	0	0	2	2	0	2	4	6	8	16	42	38	48	38	42	40	466	p-cymene methyl-monooxygenase electron transfer component [EC:1.18.1.3]	http://www.genome.jp/dbget-bin/www_bget?ko:K18293	3.77778	38.6667	4.33333	1	6	41.3333
K23352	64	50	50	70	56	140	56	54	106	20	84	20	160	110	72	152	248	148	18	20	34	54	12	18	118	100	72	198	150	174	54	46	24	28	44	52	2876	glutaconyl-CoA/methylmalonyl-CoA decarboxylase subunit delta	http://www.genome.jp/dbget-bin/www_bget?ko:K23352	71.7778	41.3333	148.333	26	135.333	41.3333
K18251	2	12	10	8	18	6	6	10	14	16	14	12	16	12	4	60	80	26	12	4	4	16	18	16	2	6	2	0	0	6	58	38	36	34	34	40	652	phthalate 3,4-dioxygenase subunit alpha [EC:1.14.12.-]	http://www.genome.jp/dbget-bin/www_bget?ko:K18251	9.55556	14	33	11.6667	2.66667	40
K21727	32	34	72	50	88	18	126	102	92	2	8	6	46	44	20	24	38	20	40	54	60	50	32	4	52	40	34	98	64	68	50	34	44	52	34	26	1658	4-nitrophenol 2-monooxygenase / 4-nitrocatechol 4-monooxygenase, reductase component	http://www.genome.jp/dbget-bin/www_bget?ko:K21727	68.2222	5.33333	32	40	59.3333	40
K01101	42	28	16	20	26	26	24	30	20	24	4	10	88	62	48	56	44	40	26	20	30	32	30	20	52	24	32	20	34	28	36	24	48	30	36	62	1192	4-nitrophenyl phosphatase [EC:3.1.3.41]	http://www.genome.jp/dbget-bin/www_bget?ko:K01101	25.7778	12.6667	56.3333	26.3333	31.6667	39.3333
K15752	10	14	4	14	16	10	20	18	4	38	26	22	36	46	26	22	38	16	6	4	4	20	10	12	44	20	12	12	16	18	38	34	40	34	44	46	794	carbazole 1,9a-dioxygenase ferredoxin component	http://www.genome.jp/dbget-bin/www_bget?ko:K15752	12.2222	28.6667	30.6667	9.33333	20.3333	39.3333
K22482	6	8	2	4	10	32	12	4	6	10	14	14	60	46	12	150	168	110	20	8	6	10	2	0	0	2	8	2	6	0	38	42	28	52	40	28	960	heterodisulfide reductase subunit C1 [EC:1.8.7.3]	http://www.genome.jp/dbget-bin/www_bget?ko:K22482	9.33333	12.6667	91	7.66667	3	38
K00193	32	42	54	58	60	94	42	82	50	200	100	170	152	134	96	362	454	330	52	8	58	10	8	2	52	62	48	66	56	108	32	32	44	54	34	30	3268	acetyl-CoA decarbonylase/synthase, CODH/ACS complex subunit beta [EC:2.3.1.169]	http://www.genome.jp/dbget-bin/www_bget?ko:K00193	57.1111	156.667	254.667	23	65.3333	37.6667
K20941	442	430	404	436	618	264	486	464	430	28	48	24	116	108	74	28	2	98	10	12	20	12	62	38	42	30	50	12	24	36	62	24	24	40	30	42	5070	gamma-resorcylate decarboxylase [EC:4.1.1.103]	http://www.genome.jp/dbget-bin/www_bget?ko:K20941	441.556	33.3333	71	25.6667	32.3333	37
K00319	0	6	14	2	10	16	0	4	0	54	34	52	68	68	62	270	268	170	16	4	4	4	0	0	2	0	0	10	2	14	28	28	32	60	26	46	1374	methylenetetrahydromethanopterin dehydrogenase [EC:1.5.98.1]	http://www.genome.jp/dbget-bin/www_bget?ko:K00319	5.77778	46.6667	151	4.66667	4.66667	36.6667
K22480	14	28	34	46	16	24	14	20	10	30	24	24	136	116	44	314	304	220	62	46	62	18	30	18	50	30	34	32	42	52	26	44	20	38	60	32	2114	heterodisulfide reductase subunit A1 [EC:1.8.7.3]	http://www.genome.jp/dbget-bin/www_bget?ko:K22480	22.8889	26	189	39.3333	40	36.6667
K16244	6	4	10	0	14	14	2	8	6	8	10	2	28	10	20	42	34	32	24	20	18	10	20	6	30	14	12	14	14	8	38	30	26	50	34	32	650	phenol/toluene 2-monooxygenase (NADH) P2/A2 [EC:1.14.13.244 1.14.13.243]	http://www.genome.jp/dbget-bin/www_bget?ko:K16244	7.11111	6.66667	27.6667	16.3333	15.3333	35
K00581	2	0	14	14	26	16	8	14	12	30	22	32	116	112	58	284	272	188	0	0	0	0	0	0	0	0	0	0	0	4	36	26	22	48	46	22	1424	tetrahydromethanopterin S-methyltransferase subunit E [EC:2.1.1.86]	http://www.genome.jp/dbget-bin/www_bget?ko:K00581	11.7778	28	171.667	0	0.666667	33.3333
K03391	18	6	8	2	4	0	2	4	0	0	2	4	0	0	0	0	0	6	4	0	0	0	10	24	0	0	0	0	4	0	28	38	28	26	30	46	294	pentachlorophenol monooxygenase [EC:1.14.13.50]	http://www.genome.jp/dbget-bin/www_bget?ko:K03391	4.88889	2	1	6.33333	0.666667	32.6667
K19067	44	28	50	44	50	74	62	42	48	80	38	60	18	20	30	14	10	34	46	38	28	8	20	24	22	26	32	122	34	72	34	26	22	34	28	48	1410	cyclohexane-1-carbonyl-CoA dehydrogenase [EC:1.3.8.11]	http://www.genome.jp/dbget-bin/www_bget?ko:K19067	49.1111	59.3333	21	27.3333	51.3333	32
K07811	40	66	36	64	42	68	76	56	68	24	26	22	84	64	56	114	90	64	8	4	16	14	14	4	86	50	74	60	32	70	32	30	30	20	44	26	1674	trimethylamine-N-oxide reductase (cytochrome c) [EC:1.7.2.3]	http://www.genome.jp/dbget-bin/www_bget?ko:K07811	57.3333	24	78.6667	10	62	30.3333
K15064	308	338	308	372	338	344	456	526	324	32	28	78	142	126	54	38	0	96	36	18	46	16	36	126	108	104	120	86	138	70	36	38	22	26	28	32	4994	syringate O-demethylase [EC:2.1.1.-]	http://www.genome.jp/dbget-bin/www_bget?ko:K15064	368.222	46	76	46.3333	104.333	30.3333
K21725	110	110	104	148	214	88	186	218	146	28	22	52	48	20	12	14	4	6	0	2	8	2	6	8	14	4	4	2	6	6	38	38	24	22	24	36	1774	4-nitrocatechol/4-nitrophenol 4-monooxygenase [EC:1.14.13.166 1.14.13.167]	http://www.genome.jp/dbget-bin/www_bget?ko:K21725	147.111	34	17.3333	4.33333	6	30.3333
K14081	24	14	24	16	36	40	8	22	22	4	14	18	130	68	42	256	248	152	28	30	34	24	22	26	210	232	226	180	138	278	12	44	26	44	10	44	2746	methanol corrinoid protein	http://www.genome.jp/dbget-bin/www_bget?ko:K14081	22.8889	12	149.333	27.3333	210.667	30
K01865	40	56	58	68	70	48	60	52	44	42	36	52	56	40	42	76	144	74	58	32	64	42	62	82	26	26	26	42	28	40	22	34	14	40	26	36	1758	(hydroxyamino)benzene mutase [EC:5.4.4.1]	http://www.genome.jp/dbget-bin/www_bget?ko:K01865	55.1111	43.3333	72	56.6667	31.3333	28.6667
K00579	2	8	2	16	26	12	4	2	4	34	22	40	84	108	62	252	286	224	0	0	0	0	0	0	0	2	0	6	0	0	18	28	16	42	32	32	1364	tetrahydromethanopterin S-methyltransferase subunit C [EC:2.1.1.86]	http://www.genome.jp/dbget-bin/www_bget?ko:K00579	8.44444	32	169.333	0	1.33333	28
K22958	354	322	354	354	370	340	398	398	288	174	170	168	134	118	52	52	20	98	46	28	32	18	134	138	102	154	108	240	146	268	34	30	32	32	22	18	5746	gallate decarboxylase subunit C [EC:4.1.1.59]	http://www.genome.jp/dbget-bin/www_bget?ko:K22958	353.111	170.667	79	66	169.667	28
K20626	12	12	24	24	50	42	56	32	18	18	4	8	28	18	30	24	40	34	18	32	44	8	8	8	56	36	48	80	38	100	22	40	20	26	30	28	1116	lactoyl-CoA dehydratase subunit alpha [EC:4.2.1.54]	http://www.genome.jp/dbget-bin/www_bget?ko:K20626	30	10	29	19.6667	59.6667	27.6667
K07550	182	150	122	128	154	114	188	274	174	22	34	16	90	86	70	66	26	82	44	20	28	26	38	48	20	44	42	22	22	36	24	26	30	20	24	36	2528	benzoylsuccinyl-CoA thiolase BbsB subunit [EC:2.3.1.310]	http://www.genome.jp/dbget-bin/www_bget?ko:K07550	165.111	24	70	34	31	26.6667
K20942	202	158	156	226	296	134	212	224	174	24	8	2	36	42	18	20	12	58	6	0	2	4	26	10	6	6	16	0	0	4	20	32	20	34	22	28	2238	resorcinol 4-hydroxylase (FADH2) [EC:1.14.14.27]	http://www.genome.jp/dbget-bin/www_bget?ko:K20942	198	11.3333	31	8	5.33333	26
K01612	62	46	76	108	90	84	116	104	94	48	30	52	44	34	8	12	14	40	100	60	78	18	40	18	32	40	64	32	34	46	28	30	38	22	10	26	1778	vanillate/4-hydroxybenzoate decarboxylase subunit C [EC:4.1.1.- 4.1.1.61]	http://www.genome.jp/dbget-bin/www_bget?ko:K01612	86.6667	43.3333	25.3333	52.3333	41.3333	25.6667
K20218	574	506	596	732	744	380	732	734	638	214	114	170	238	126	126	22	14	86	42	40	30	138	108	182	74	60	80	48	94	108	32	20	32	22	16	30	7902	4-hydroxyisophthalate hydroxylase	http://www.genome.jp/dbget-bin/www_bget?ko:K20218	626.222	166	102	90	77.3333	25.3333
K00402	2	0	10	6	12	4	4	2	6	38	18	54	92	74	60	326	316	138	0	4	0	0	0	2	0	0	0	4	0	4	42	24	16	26	18	18	1320	methyl-coenzyme M reductase gamma subunit [EC:2.8.4.1]	http://www.genome.jp/dbget-bin/www_bget?ko:K00402	5.11111	36.6667	167.667	1	1.33333	24
K16305	2	10	10	16	16	6	0	6	18	12	18	6	76	66	22	172	136	124	30	20	12	12	6	4	40	16	32	132	40	108	20	18	26	28	28	24	1312	fructose-bisphosphate aldolase / 6-deoxy-5-ketofructose 1-phosphate synthase [EC:4.1.2.13 2.2.1.11]	http://www.genome.jp/dbget-bin/www_bget?ko:K16305	9.33333	12	99.3333	14	61.3333	24
K14519	68	92	144	54	136	112	88	72	206	44	36	42	170	70	120	114	8	246	12	20	12	46	14	8	8	2	4	6	8	8	22	16	24	40	22	18	2112	NADP-dependent aldehyde dehydrogenase [EC:1.2.1.4]	http://www.genome.jp/dbget-bin/www_bget?ko:K14519	108	40.6667	121.333	18.6667	6	23.6667
K05600	0	0	4	0	2	0	0	4	0	2	0	0	0	0	0	0	0	0	0	0	0	0	0	0	0	0	0	0	0	0	0	0	16	12	100	12	152	anthranilate 1,2-dioxygenase (deaminating, decarboxylating) small subunit [EC:1.14.12.1]	http://www.genome.jp/dbget-bin/www_bget?ko:K05600	1.11111	0.666667	0	0	0	23.3333
K25932	54	38	54	32	54	40	84	100	40	150	130	134	62	52	68	72	130	46	46	30	26	8	28	30	116	46	42	154	124	228	24	26	28	22	16	22	2356	phenyl-phosphate phosphatase/carboxylase subunit alpha [EC:4.1.1.123]	http://www.genome.jp/dbget-bin/www_bget?ko:K25932	55.1111	138	71.6667	28	118.333	23
K03533	160	118	164	164	158	144	184	162	180	20	8	12	86	64	20	76	56	56	26	54	44	26	60	30	90	72	72	90	64	122	18	20	22	20	26	28	2716	TorA specific chaperone	http://www.genome.jp/dbget-bin/www_bget?ko:K03533	159.333	13.3333	59.6667	40	85	22.3333
K14748	146	152	176	134	140	104	126	148	154	6	14	18	52	16	38	28	6	60	30	38	30	58	40	24	94	104	156	58	140	76	16	22	34	14	24	24	2500	ethylbenzene dioxygenase subunit alpha [EC:1.14.12.-]	http://www.genome.jp/dbget-bin/www_bget?ko:K14748	142.222	12.6667	33.3333	36.6667	104.667	22.3333
K00580	2	0	10	8	8	4	6	22	2	16	12	16	46	62	22	250	208	172	0	0	0	0	0	0	0	0	0	0	0	2	20	16	8	34	28	14	988	tetrahydromethanopterin S-methyltransferase subunit D [EC:2.1.1.86]	http://www.genome.jp/dbget-bin/www_bget?ko:K00580	6.88889	14.6667	126.667	0	0.333333	20
K18248	18	16	26	20	26	36	18	28	20	8	28	4	52	38	16	76	80	48	36	14	26	54	18	66	22	32	44	28	40	46	4	30	18	24	36	4	1100	anthranilate 1,2-dioxygenase ferredoxin component	http://www.genome.jp/dbget-bin/www_bget?ko:K18248	23.1111	13.3333	51.6667	35.6667	35.3333	19.3333
K00578	0	10	0	4	6	0	2	0	0	6	4	8	20	30	24	90	92	50	0	0	0	2	0	0	2	0	0	0	0	6	12	22	22	22	20	14	468	tetrahydromethanopterin S-methyltransferase subunit B [EC:2.1.1.86]	http://www.genome.jp/dbget-bin/www_bget?ko:K00578	2.44444	6	51	0.333333	1.33333	18.6667
K00148	28	42	20	22	42	30	26	28	42	16	30	16	78	66	28	48	26	56	16	22	26	16	34	26	14	26	10	26	26	26	20	20	4	22	32	12	1022	glutathione-independent formaldehyde dehydrogenase [EC:1.2.1.46]	http://www.genome.jp/dbget-bin/www_bget?ko:K00148	31.1111	20.6667	50.3333	23.3333	21.3333	18.3333
K14579	60	78	70	60	56	106	90	112	88	2	2	6	4	24	12	4	2	32	0	6	0	4	2	8	60	62	50	46	42	22	18	12	12	22	28	18	1220	naphthalene 1,2-dioxygenase subunit alpha [EC:1.14.12.12 1.14.12.23 1.14.12.24]	http://www.genome.jp/dbget-bin/www_bget?ko:K14579	80	3.33333	13	3.33333	47	18.3333
K18069	206	154	216	218	268	200	298	220	224	22	18	20	88	54	38	26	4	48	24	30	36	18	40	42	46	34	50	24	36	44	16	22	12	26	18	14	2854	phthalate 4,5-dioxygenase reductase component [EC:1.18.1.-]	http://www.genome.jp/dbget-bin/www_bget?ko:K18069	222.667	20	43	31.6667	39	18
K15058	18	12	6	12	20	2	10	12	4	0	0	0	2	12	8	6	18	0	30	12	50	32	32	26	26	40	44	20	66	68	20	26	12	20	18	10	694	2-aminophenol/2-amino-5-chlorophenol 1,6-dioxygenase subunit alpha	http://www.genome.jp/dbget-bin/www_bget?ko:K15058	10.6667	0	7.66667	30.3333	44	17.6667
K03421	2	8	14	2	2	14	10	10	2	22	4	20	58	50	34	196	198	170	0	0	0	0	2	0	2	0	0	0	0	2	8	10	18	30	24	14	926	methyl-coenzyme M reductase subunit C	http://www.genome.jp/dbget-bin/www_bget?ko:K03421	7.11111	15.3333	117.667	0.333333	0.666667	17.3333
K04107	154	112	124	134	194	88	202	124	142	212	128	180	134	86	56	74	40	40	10	2	10	0	18	30	0	6	6	16	4	16	14	8	14	26	20	22	2446	4-hydroxybenzoyl-CoA reductase subunit gamma [EC:1.1.7.1]	http://www.genome.jp/dbget-bin/www_bget?ko:K04107	141.556	173.333	71.6667	11.6667	8	17.3333
K25938	34	24	44	36	34	38	44	34	36	2	4	6	14	12	0	40	32	28	12	4	22	2	4	0	20	16	14	58	26	48	12	10	26	20	24	12	792	phenol phosphorylase subunit delta gamma [EC:2.7.1.238]	http://www.genome.jp/dbget-bin/www_bget?ko:K25938	36	4	21	7.33333	30.3333	17.3333
K08690	8	2	0	6	6	4	2	4	4	0	0	0	2	0	4	10	10	6	10	4	2	0	22	2	0	0	0	0	0	0	20	14	6	14	28	20	210	cis-2,3-dihydrobiphenyl-2,3-diol dehydrogenase [EC:1.3.1.56]	http://www.genome.jp/dbget-bin/www_bget?ko:K08690	4	0	5.33333	6.66667	0	17
K18252	2	4	10	0	2	10	10	14	4	6	0	2	0	0	0	0	0	0	2	0	0	0	2	0	0	2	6	0	8	2	14	24	12	20	24	8	188	phthalate 3,4-dioxygenase subunit beta [EC:1.14.12.-]	http://www.genome.jp/dbget-bin/www_bget?ko:K18252	6.22222	2.66667	0	0.666667	3	17
K00195	6	10	14	16	6	16	0	18	8	12	20	24	84	50	22	142	188	96	12	10	6	2	2	0	8	6	6	18	4	8	16	18	16	12	22	14	912	anaerobic carbon-monoxide dehydrogenase, CODH/ACS complex subunit epsilon	http://www.genome.jp/dbget-bin/www_bget?ko:K00195	10.4444	18.6667	97	5.33333	8.33333	16.3333
K16249	0	0	0	0	0	4	0	4	0	0	4	0	14	12	24	20	16	12	4	10	14	6	6	6	14	22	14	10	26	18	20	4	24	20	16	10	354	phenol/toluene 2-monooxygenase (NADH) P0/A0	http://www.genome.jp/dbget-bin/www_bget?ko:K16249	0.888889	1.33333	16.3333	7.66667	17.3333	15.6667
K11822	0	0	2	0	2	4	8	4	0	4	6	0	80	50	64	36	90	38	28	10	34	14	38	42	80	108	54	52	58	82	2	26	12	10	14	20	1072	bile-salt sulfotransferase [EC:2.8.2.14]	http://www.genome.jp/dbget-bin/www_bget?ko:K11822	2.22222	3.33333	59.6667	27.6667	72.3333	14
K16304	0	4	2	0	4	0	4	6	8	50	20	48	6	0	4	0	0	0	6	16	4	20	2	4	34	28	46	2	14	40	18	14	18	14	6	14	456	p-cumate 2,3-dioxygenase ferredoxin component	http://www.genome.jp/dbget-bin/www_bget?ko:K16304	3.11111	39.3333	1.66667	8.66667	27.3333	14
K15303	30	18	22	12	10	4	8	6	14	0	8	2	4	12	6	4	0	14	16	10	14	2	44	56	58	28	30	20	48	26	8	8	22	12	12	20	608	aflatoxin B1 aldehyde reductase	http://www.genome.jp/dbget-bin/www_bget?ko:K15303	13.7778	3.33333	6.66667	23.6667	35	13.6667
K15013	2	10	12	14	20	20	22	42	22	24	4	16	38	28	44	28	28	28	6	4	8	2	4	2	22	16	24	20	40	54	10	10	12	14	14	20	684	long-chain-fatty-acid--CoA ligase ACSBG [EC:6.2.1.3]	http://www.genome.jp/dbget-bin/www_bget?ko:K15013	18.2222	14.6667	32.3333	4.33333	29.3333	13.3333
K15241	88	70	74	68	122	78	66	56	84	6	2	8	62	54	32	28	0	54	8	0	4	4	22	40	32	46	68	8	10	30	22	10	6	22	12	8	1304	tetrachlorohydroquinone reductive dehalogenase [EC:1.21.4.5]	http://www.genome.jp/dbget-bin/www_bget?ko:K15241	78.4444	5.33333	38.3333	13	32.3333	13.3333
K15059	16	28	8	12	12	10	14	22	6	0	6	4	12	6	6	12	42	8	18	34	56	18	50	40	52	40	40	48	60	66	6	12	24	10	14	12	824	2-aminophenol/2-amino-5-chlorophenol 1,6-dioxygenase subunit beta [EC:1.13.11.74 1.13.11.76]	http://www.genome.jp/dbget-bin/www_bget?ko:K15059	14.2222	3.33333	14.3333	36	51	13
K16177	20	32	42	66	30	34	28	36	46	16	18	14	86	58	34	220	248	140	12	12	28	2	6	2	8	30	14	20	8	32	8	6	4	26	18	14	1418	monomethylamine corrinoid protein	http://www.genome.jp/dbget-bin/www_bget?ko:K16177	37.1111	16	131	10.3333	18.6667	12.6667
K03422	6	2	0	0	2	8	6	4	0	14	2	4	54	44	46	154	194	154	0	0	0	0	0	0	0	0	0	0	0	6	12	6	6	16	22	12	774	methyl-coenzyme M reductase subunit D	http://www.genome.jp/dbget-bin/www_bget?ko:K03422	3.11111	6.66667	107.667	0	1	12.3333
K18256	28	26	48	38	20	34	34	50	30	8	6	4	12	8	10	10	0	6	0	6	6	2	8	0	52	22	36	120	58	142	12	2	20	12	8	20	898	3,4-dihydroxyphthalate decarboxylase [EC:4.1.1.69]	http://www.genome.jp/dbget-bin/www_bget?ko:K18256	34.2222	6	7.66667	3.66667	71.6667	12.3333
K11946	2	8	12	12	14	4	8	6	14	0	0	0	4	6	2	0	2	0	0	0	0	0	0	0	0	4	0	0	0	0	10	20	6	8	16	12	170	hydratase-aldolase [EC:4.1.2.-]	http://www.genome.jp/dbget-bin/www_bget?ko:K11946	8.88889	0	2.33333	0	0.666667	12
K11944	6	4	4	2	16	2	4	0	8	2	8	2	2	2	0	8	12	2	12	14	18	18	14	6	8	10	14	14	20	6	20	10	10	18	4	8	308	PAH dioxygenase small subunit [EC:1.13.11.-]	http://www.genome.jp/dbget-bin/www_bget?ko:K11944	5.11111	4	4.33333	13.6667	12	11.6667
K15763	0	14	4	0	0	4	6	10	2	0	2	0	0	0	0	0	0	0	0	0	2	8	0	0	0	0	0	0	0	0	10	14	12	14	12	8	122	toluene monooxygenase system protein D [EC:1.14.13.236 1.14.13.-]	http://www.genome.jp/dbget-bin/www_bget?ko:K15763	4.44444	0.666667	0	1.66667	0	11.6667
K18242	74	108	62	92	116	36	94	84	118	10	12	12	24	26	26	16	38	18	14	4	6	56	22	34	0	4	2	0	0	0	8	10	8	18	14	10	1176	salicylate 5-hydroxylase large subunit [EC:1.14.13.172]	http://www.genome.jp/dbget-bin/www_bget?ko:K18242	87.1111	11.3333	24.6667	22.6667	1	11.3333
K15761	0	0	0	0	0	0	2	0	0	0	0	0	0	0	0	0	0	0	0	0	0	0	0	0	0	0	0	0	0	0	6	6	8	24	16	6	68	toluene monooxygenase system protein B [EC:1.14.13.236 1.14.13.-]	http://www.genome.jp/dbget-bin/www_bget?ko:K15761	0.222222	0	0	0	0	11
K14746	126	150	178	118	232	138	230	216	140	12	6	12	66	40	16	14	0	16	8	8	8	124	6	4	0	4	0	0	2	2	18	6	10	14	8	8	1940	(S)-1-phenylethanol dehydrogenase [EC:1.1.1.311]	http://www.genome.jp/dbget-bin/www_bget?ko:K14746	169.778	10	25.3333	26.3333	1.33333	10.6667
K07548	20	12	16	14	18	8	10	14	10	14	2	22	20	10	24	14	30	10	86	74	62	46	40	36	6	20	4	2	4	16	10	14	4	2	14	14	722	(2S)-[(R)-hydroxy(phenyl)methyl]-succinyl-CoA dehydrogenase BbsD subunit [EC:1.1.1.429]	http://www.genome.jp/dbget-bin/www_bget?ko:K07548	13.5556	12.6667	18	57.3333	8.66667	9.66667
K10620	4	8	16	6	20	10	18	30	10	2	2	0	10	2	0	0	0	2	0	0	0	2	0	0	0	2	2	0	0	0	6	8	20	4	8	12	204	2,3-dihydroxy-2,3-dihydro-p-cumate dehydrogenase [EC:1.3.1.58]	http://www.genome.jp/dbget-bin/www_bget?ko:K10620	13.5556	1.33333	2.33333	0.333333	0.666667	9.66667
K16270	32	26	36	24	10	20	10	22	36	0	0	2	6	6	0	0	0	6	2	0	0	0	0	0	2	0	0	0	0	6	8	10	4	4	14	18	304	3-methylcatechol 2,3-dioxygenase [EC:1.13.11.-]	http://www.genome.jp/dbget-bin/www_bget?ko:K16270	24	0.666667	3	0.333333	1.33333	9.66667
K16303	26	24	44	16	28	18	8	22	30	18	18	26	14	18	14	6	2	16	0	0	0	0	2	2	4	6	12	0	0	0	14	10	4	12	12	6	432	p-cumate 2,3-dioxygenase subunit beta [EC:1.14.12.25]	http://www.genome.jp/dbget-bin/www_bget?ko:K16303	24	20.6667	11.6667	0.666667	3.66667	9.66667
K19961	16	10	6	18	14	20	26	18	16	30	0	2	0	6	10	0	0	0	4	0	2	0	4	18	0	0	0	4	0	0	6	16	8	8	14	4	280	6-hydroxyhexanoate dehydrogenase [EC:1.1.1.258]	http://www.genome.jp/dbget-bin/www_bget?ko:K19961	16	10.6667	2.66667	4.66667	0.666667	9.33333
K15245	2	0	0	0	0	0	0	0	0	0	0	0	0	2	0	0	0	0	4	0	0	0	0	0	0	0	4	0	0	0	4	10	6	6	14	14	66	flavin reductase [EC:1.5.1.37]	http://www.genome.jp/dbget-bin/www_bget?ko:K15245	0.222222	0	0.333333	0.666667	0.666667	9
K08765	2	0	0	0	0	0	2	0	0	0	0	0	0	0	0	0	0	0	2	0	0	0	0	2	0	0	0	0	2	0	4	6	18	8	12	4	62	carnitine O-palmitoyltransferase 1, liver isoform [EC:2.3.1.21]	http://www.genome.jp/dbget-bin/www_bget?ko:K08765	0.444444	0	0	0.666667	0.333333	8.66667
K15750	38	58	102	40	50	42	36	14	74	0	0	2	14	10	4	6	0	6	6	6	8	26	12	16	40	80	64	44	58	86	14	8	14	6	2	2	988	biphenyl 2,3-dioxygenase subunit beta [EC:1.14.12.18]	http://www.genome.jp/dbget-bin/www_bget?ko:K15750	50.4444	0.666667	6.66667	12.3333	62	7.66667
K10617	76	56	58	52	76	32	104	94	64	26	16	14	38	34	14	16	12	14	8	2	6	2	12	18	0	0	0	0	0	2	14	2	6	6	12	4	890	p-cumic alcohol dehydrogenase	http://www.genome.jp/dbget-bin/www_bget?ko:K10617	68	18.6667	21.3333	8	0.333333	7.33333
K00204	0	0	0	0	0	0	0	0	0	4	2	0	0	0	0	0	0	0	0	0	0	0	0	0	0	0	0	4	2	0	2	6	14	12	4	4	54	4Fe-4S ferredoxin	http://www.genome.jp/dbget-bin/www_bget?ko:K00204	0	2	0	0	1	7
K00582	4	0	2	0	0	6	0	0	0	4	2	6	10	18	6	32	40	24	0	2	0	0	0	0	0	0	0	2	0	0	16	2	8	6	6	2	198	tetrahydromethanopterin S-methyltransferase subunit F [EC:2.1.1.86]	http://www.genome.jp/dbget-bin/www_bget?ko:K00582	1.33333	4	21.6667	0.333333	0.333333	6.66667
K07408	0	0	0	2	0	0	0	0	0	0	0	0	4	2	4	0	14	0	0	0	0	0	0	0	0	0	0	0	0	0	2	2	4	10	8	14	66	cytochrome P450 family 1 subfamily A1 [EC:1.14.14.1]	http://www.genome.jp/dbget-bin/www_bget?ko:K07408	0.222222	0	4	0	0	6.66667
K11943	38	32	24	36	58	22	24	40	20	0	2	0	2	10	4	6	10	10	6	2	0	6	2	2	14	30	20	8	28	26	6	8	4	4	14	4	522	PAH dioxygenase large subunit [EC:1.13.11.-]	http://www.genome.jp/dbget-bin/www_bget?ko:K11943	32.6667	0.666667	7	3	21	6.66667
K00480	50	18	56	64	104	50	66	70	92	14	0	16	34	22	12	10	10	14	4	16	0	40	2	4	4	8	8	8	22	6	2	0	4	6	24	2	862	salicylate hydroxylase [EC:1.14.13.1]	http://www.genome.jp/dbget-bin/www_bget?ko:K00480	63.3333	10	17	11	9.33333	6.33333
K03396	144	152	122	142	152	104	100	126	114	28	6	14	54	52	38	38	52	62	24	14	6	18	50	60	6	10	6	2	8	6	2	8	8	10	6	4	1748	S-(hydroxymethyl)glutathione synthase [EC:4.4.1.22]	http://www.genome.jp/dbget-bin/www_bget?ko:K03396	128.444	16	49.3333	28.6667	6.33333	6.33333
K14028	56	68	10	28	36	40	42	62	46	10	20	12	8	4	2	4	2	42	0	4	0	0	0	0	0	0	0	2	4	4	0	6	8	4	14	6	544	methanol dehydrogenase (cytochrome c) subunit 1 [EC:1.1.2.7]	http://www.genome.jp/dbget-bin/www_bget?ko:K14028	43.1111	14	10.3333	0.666667	1.66667	6.33333
K14599	22	12	2	14	18	14	18	14	42	2	8	4	6	12	4	2	10	14	12	8	6	14	2	0	10	16	6	6	2	4	2	14	2	6	8	6	342	dibenzofuran dioxygenase subunit alpha [EC:1.14.12.-]	http://www.genome.jp/dbget-bin/www_bget?ko:K14599	17.3333	4.66667	8	7	7.33333	6.33333
K15065	98	88	68	60	76	32	50	96	62	20	20	12	28	20	14	6	0	14	14	14	6	8	26	46	8	14	2	6	12	8	10	2	4	8	4	10	966	3-O-methylgallate 3,4-dioxygenase [EC:1.13.11.-]	http://www.genome.jp/dbget-bin/www_bget?ko:K15065	70	17.3333	13.6667	19	8.33333	6.33333
K15238	16	8	22	8	22	14	14	6	8	4	10	4	16	2	8	2	2	2	0	8	2	0	2	0	10	6	8	8	2	2	6	10	2	6	10	4	254	2,5-dichloro-2,5-cyclohexadiene-1,4-diol dehydrogenase 2 [EC:1.3.1.-]	http://www.genome.jp/dbget-bin/www_bget?ko:K15238	13.1111	6	5.33333	2	6	6.33333
K18243	2	6	2	0	2	2	4	0	10	0	2	6	0	0	0	2	4	0	6	4	0	48	6	8	0	6	6	0	0	2	2	10	12	6	2	6	166	salicylate 5-hydroxylase small subunit [EC:1.14.13.172]	http://www.genome.jp/dbget-bin/www_bget?ko:K18243	3.11111	2.66667	1	12	2.33333	6.33333
K19066	20	6	20	8	6	54	16	26	10	16	20	22	2	12	0	0	0	10	6	2	8	2	4	0	32	4	10	94	16	72	8	10	4	0	12	2	534	cyclohex-1-ene-1-carbonyl-CoA dehydrogenase [EC:1.3.8.10]	http://www.genome.jp/dbget-bin/www_bget?ko:K19066	18.4444	19.3333	4	3.66667	38	6
K10702	18	28	26	14	6	14	12	6	10	0	0	0	2	8	2	0	0	2	6	10	16	0	20	12	0	2	12	4	4	6	4	14	6	2	4	4	274	2-hydroxy-6-oxohepta-2,4-dienoate hydrolase [EC:3.7.1.25]	http://www.genome.jp/dbget-bin/www_bget?ko:K10702	14.8889	0	2.33333	10.6667	4.66667	5.66667
K15061	42	36	58	38	52	26	42	50	10	8	22	8	10	26	2	6	2	16	4	0	0	2	20	36	0	0	0	0	0	0	12	2	2	4	8	4	548	OH-DDVA oxygenase	http://www.genome.jp/dbget-bin/www_bget?ko:K15061	39.3333	12.6667	10.3333	10.3333	0	5.33333
K18075	2	4	6	0	2	0	6	4	4	2	0	4	4	0	0	0	4	4	4	0	0	0	12	0	0	0	0	0	0	0	4	6	6	6	10	0	94	terephthalate 1,2-dioxygenase oxygenase component beta subunit [EC:1.14.12.15]	http://www.genome.jp/dbget-bin/www_bget?ko:K18075	3.11111	2	2	2.66667	0	5.33333
K00583	0	2	2	0	6	4	2	0	2	4	4	4	6	6	6	28	28	24	0	0	0	0	0	0	0	0	0	2	0	0	6	10	4	10	0	0	160	tetrahydromethanopterin S-methyltransferase subunit G [EC:2.1.1.86]	http://www.genome.jp/dbget-bin/www_bget?ko:K00583	2	4	16.3333	0	0.333333	5
K16901	68	68	54	52	54	52	20	58	42	8	8	2	16	12	12	0	0	8	2	4	8	12	36	70	6	8	12	2	6	0	0	10	2	14	0	4	730	anthranilate 3-monooxygenase (FAD) / 4-hydroxyphenylacetate 3-monooxygenase [EC:1.14.14.8 1.14.14.9]	http://www.genome.jp/dbget-bin/www_bget?ko:K16901	52	6	8	22	5.66667	5
K20458	56	68	34	54	84	40	78	72	40	8	2	2	6	8	8	0	0	10	2	2	2	0	32	42	6	0	0	0	0	8	0	8	2	8	2	10	694	3-hydroxybenzoate/4-hydroxybenzoate---CoA ligase [EC:6.2.1.37 6.2.1.27]	http://www.genome.jp/dbget-bin/www_bget?ko:K20458	58.4444	4	5.33333	13.3333	2.33333	5
K20627	10	4	16	24	12	20	16	46	22	18	4	22	4	4	4	12	24	20	10	10	6	8	6	4	2	4	8	42	4	26	6	6	2	8	4	4	442	lactoyl-CoA dehydratase subunit beta [EC:4.2.1.54]	http://www.genome.jp/dbget-bin/www_bget?ko:K20627	18.8889	14.6667	11.3333	7.33333	14.3333	5
K10618	6	14	20	4	4	6	24	8	14	10	8	4	34	22	14	24	28	28	2	8	6	8	0	8	18	8	6	8	4	14	6	6	2	4	4	4	388	p-cumic aldehyde dehydrogenase	http://www.genome.jp/dbget-bin/www_bget?ko:K10618	11.1111	7.33333	25	5.33333	9.66667	4.33333
K15062	14	40	18	12	14	16	12	12	12	2	10	8	8	14	10	8	0	4	0	0	2	0	2	12	0	2	4	0	2	2	8	0	8	2	0	8	266	OH-DDVA meta-cleavage compound hydrolase	http://www.genome.jp/dbget-bin/www_bget?ko:K15062	16.6667	6.66667	7.33333	2.66667	1.66667	4.33333
K25123	10	4	4	2	0	2	2	0	4	2	6	4	0	2	2	0	0	0	0	6	4	0	0	0	2	4	0	0	2	2	0	10	4	6	2	4	90	iron hydrogenase HydA2 [EC:1.12.7.-]	http://www.genome.jp/dbget-bin/www_bget?ko:K25123	3.11111	4	0.666667	1.66667	1.66667	4.33333
K14085	0	20	32	26	14	22	30	22	24	10	18	8	38	16	20	2	24	14	72	48	8	2	26	70	8	8	0	14	14	20	6	4	2	4	6	2	654	aldehyde dehydrogenase family 7 member A1 [EC:1.2.1.31 1.2.1.8 1.2.1.3]	http://www.genome.jp/dbget-bin/www_bget?ko:K14085	21.1111	12	19	37.6667	10.6667	4
K18090	0	0	0	0	0	0	0	0	0	0	0	0	0	0	0	0	0	0	0	0	0	0	0	0	0	0	0	0	0	0	0	0	0	0	18	6	24	benzene/toluene/chlorobenzene dioxygenase ferredoxin reductase component [EC:1.18.1.3 1.18.1.-]	http://www.genome.jp/dbget-bin/www_bget?ko:K18090	0	0	0	0	0	4
K03268	0	0	0	0	4	0	6	2	0	0	0	0	0	0	0	0	0	0	0	0	0	0	0	0	0	0	0	0	0	0	0	2	2	2	14	2	34	benzene/toluene/chlorobenzene dioxygenase subunit alpha [EC:1.14.12.3 1.14.12.11 1.14.12.26]	http://www.genome.jp/dbget-bin/www_bget?ko:K03268	1.33333	0	0	0	0	3.66667
K20200	6	16	16	8	4	10	2	4	6	0	0	0	0	0	0	0	0	2	0	0	0	0	0	0	0	0	0	0	0	0	2	6	6	2	4	2	96	4-cresol dehydrogenase (hydroxylating) cytochrome subunit	http://www.genome.jp/dbget-bin/www_bget?ko:K20200	8	0	0.333333	0	0	3.66667
K00484	48	44	72	74	86	58	40	34	42	76	48	60	30	24	14	22	20	60	8	10	8	8	32	18	4	6	2	16	12	14	4	10	0	2	2	2	1010	flavin reductase (NADH) [EC:1.5.1.36]	http://www.genome.jp/dbget-bin/www_bget?ko:K00484	55.3333	61.3333	28.3333	14	9	3.33333
K15751	10	14	12	12	4	6	10	2	6	0	0	0	18	18	20	0	0	0	4	6	8	8	4	10	12	12	2	4	6	4	0	2	2	4	8	4	232	carbazole 1,9a-dioxygenase [EC:1.14.12.22]	http://www.genome.jp/dbget-bin/www_bget?ko:K15751	8.44444	0	9.33333	6.66667	6.66667	3.33333
K16320	72	64	74	76	94	60	70	104	68	10	2	4	10	26	4	4	6	16	0	4	0	0	0	4	18	20	18	36	18	16	10	2	4	0	4	0	918	anthranilate 1,2-dioxygenase small subunit [EC:1.14.12.1]	http://www.genome.jp/dbget-bin/www_bget?ko:K16320	75.7778	5.33333	11	1.33333	21	3.33333
K24393	16	22	18	16	24	6	46	18	22	14	14	14	86	76	38	308	238	196	4	0	4	4	10	32	26	22	20	20	40	22	0	2	0	12	2	2	1394	sulfopyruvate decarboxylase [EC:4.1.1.79]	http://www.genome.jp/dbget-bin/www_bget?ko:K24393	20.8889	14	157	9	25	3
K13951	6	0	10	12	12	8	14	26	2	2	10	16	0	0	0	0	0	0	6	4	6	2	18	2	14	6	22	18	10	32	0	2	0	6	8	0	274	alcohol dehydrogenase 1/7 [EC:1.1.1.1]	http://www.genome.jp/dbget-bin/www_bget?ko:K13951	10	9.33333	0	6.33333	17	2.66667
K17066	4	0	4	2	6	4	4	4	2	0	0	0	0	0	4	0	2	14	4	4	0	2	6	2	4	0	0	2	0	0	2	2	2	0	8	2	90	alcohol oxidase [EC:1.1.3.13]	http://www.genome.jp/dbget-bin/www_bget?ko:K17066	3.33333	0	3.33333	3	1	2.66667
K25935	2	12	8	8	0	0	16	2	14	30	16	24	22	6	4	26	32	10	2	8	0	0	0	0	20	40	36	92	50	100	4	0	4	0	4	4	596	phenyl-phosphate phosphatase/carboxylase subunit delta [EC:4.1.1.123]	http://www.genome.jp/dbget-bin/www_bget?ko:K25935	6.88889	23.3333	16.6667	1.66667	56.3333	2.66667
K07425	8	6	14	18	18	8	6	24	14	0	0	0	6	24	18	6	2	4	14	0	10	10	8	14	16	8	14	12	12	16	4	0	2	4	4	0	324	long-chain fatty acid omega-monooxygenase [EC:1.14.14.80]	http://www.genome.jp/dbget-bin/www_bget?ko:K07425	12.8889	0	10	9.33333	13	2.33333
K10622	0	14	0	0	8	2	12	0	8	4	0	0	0	2	4	2	0	0	0	2	0	0	0	0	0	0	0	2	0	0	4	4	0	2	0	2	72	HCOMODA/2-hydroxy-3-carboxy-muconic semialdehyde decarboxylase [EC:4.1.1.-]	http://www.genome.jp/dbget-bin/www_bget?ko:K10622	4.88889	1.33333	1.33333	0.333333	0.333333	2
K18076	0	0	0	0	0	0	0	0	0	0	4	2	0	0	2	0	0	0	2	2	8	0	0	2	8	0	0	0	2	0	6	0	2	0	4	0	44	1,2-dihydroxy-3,5-cyclohexadiene-1,4-dicarboxylate dehydrogenase [EC:1.3.1.53]	http://www.genome.jp/dbget-bin/www_bget?ko:K18076	0	2	0.333333	2.33333	1.66667	2
K00487	2	2	0	6	2	0	14	0	2	0	0	0	0	0	0	0	0	0	0	0	0	0	0	0	0	0	0	0	0	0	6	0	2	0	0	2	38	trans-cinnamate 4-monooxygenase [EC:1.14.14.91]	http://www.genome.jp/dbget-bin/www_bget?ko:K00487	3.11111	0	0	0	0	1.66667
K16269	0	0	0	0	0	0	0	0	0	0	0	0	0	0	0	0	0	0	0	0	0	0	0	0	0	0	0	0	0	0	0	2	0	0	6	2	10	cis-1,2-dihydrobenzene-1,2-diol/chlorobenzene dihydrodiol dehydrogenase [EC:1.3.1.19 1.3.1.119]	http://www.genome.jp/dbget-bin/www_bget?ko:K16269	0	0	0	0	0	1.66667
K19709	8	4	6	12	14	2	14	10	20	2	0	0	10	4	4	2	0	12	8	6	4	2	0	0	10	16	14	6	12	14	2	4	0	0	4	0	226	acetate CoA-transferase [EC:2.8.3.8]	http://www.genome.jp/dbget-bin/www_bget?ko:K19709	10	0.666667	5.33333	3.33333	12	1.66667
K25124	20	34	36	38	58	30	44	56	30	0	2	2	18	16	10	12	0	4	8	16	2	4	16	30	0	4	2	4	12	10	4	0	2	2	2	0	528	FeS-containing electron transfer protein	http://www.genome.jp/dbget-bin/www_bget?ko:K25124	38.4444	1.33333	10	12.6667	5.33333	1.66667
K14585	196	176	242	216	266	210	308	302	270	6	8	10	70	56	34	24	4	70	2	4	0	8	12	8	50	102	76	22	60	48	2	0	0	0	4	2	2868	trans-o-hydroxybenzylidenepyruvate hydratase-aldolase [EC:4.1.2.45]	http://www.genome.jp/dbget-bin/www_bget?ko:K14585	242.889	8	43	5.66667	59.6667	1.33333
K14749	128	74	70	104	62	76	60	58	86	10	4	10	28	14	4	8	16	14	2	12	2	10	28	20	86	132	98	46	64	52	0	4	2	0	2	0	1386	ethylbenzene dioxygenase subunit beta [EC:1.14.12.-]	http://www.genome.jp/dbget-bin/www_bget?ko:K14749	79.7778	8	14	12.3333	79.6667	1.33333
K16255	204	122	166	154	176	130	120	154	144	10	0	8	104	32	44	36	16	62	2	0	0	0	6	20	6	4	8	0	0	0	2	0	2	2	0	2	1736	cytochrome c-L	http://www.genome.jp/dbget-bin/www_bget?ko:K16255	152.222	6	49	4.66667	3	1.33333
K16268	0	0	0	0	0	0	0	0	0	0	0	0	0	0	0	0	0	0	0	0	0	0	0	0	0	8	2	2	2	2	0	0	0	0	8	0	24	benzene/toluene/chlorobenzene dioxygenase subunit beta [EC:1.14.12.3 1.14.12.11 1.14.12.26]	http://www.genome.jp/dbget-bin/www_bget?ko:K16268	0	0	0	0	2.66667	1.33333
K01860	16	8	12	8	12	4	10	16	14	0	0	0	2	10	2	4	0	2	2	0	0	0	0	0	2	0	0	0	4	4	0	2	0	0	0	4	138	chloromuconate cycloisomerase [EC:5.5.1.7]	http://www.genome.jp/dbget-bin/www_bget?ko:K01860	11.1111	0	3.33333	0.333333	1.66667	1
K14751	164	118	112	150	200	152	192	166	180	22	12	8	20	42	10	8	0	28	8	14	8	24	12	18	38	22	68	18	26	26	0	2	2	2	0	0	1872	2,3-dihydroxyethylbenzene 1,2-dioxygenase [EC:1.13.11.-]	http://www.genome.jp/dbget-bin/www_bget?ko:K14751	159.333	14	18	14	33	1
K16257	94	40	82	62	72	74	54	62	80	6	0	2	34	14	20	2	0	10	6	0	0	44	12	18	0	0	0	0	2	0	0	0	0	6	0	0	796	mxaC protein	http://www.genome.jp/dbget-bin/www_bget?ko:K16257	68.8889	2.66667	13.3333	13.3333	0.333333	1
K18275	18	8	16	14	38	20	8	26	22	2	14	2	6	6	2	2	12	4	0	0	0	0	0	8	0	4	0	2	0	8	2	2	0	0	2	0	248	2-formylbenzoate dehydrogenase [EC:1.2.1.78]	http://www.genome.jp/dbget-bin/www_bget?ko:K18275	18.8889	6	5.33333	1.33333	2.33333	1
K07514	0	2	2	8	4	4	2	0	2	8	4	8	2	0	0	0	0	0	0	0	0	8	2	4	0	0	2	0	0	0	0	2	0	0	2	0	66	enoyl-CoA hydratase / 3-hydroxyacyl-CoA dehydrogenase / 3,2-trans-enoyl-CoA isomerase [EC:4.2.1.17 1.1.1.35 5.3.3.8]	http://www.genome.jp/dbget-bin/www_bget?ko:K07514	2.66667	6.66667	0.333333	2.33333	0.333333	0.666667
K07540	22	10	18	24	14	32	20	16	16	4	0	4	6	18	2	32	82	4	12	2	12	0	4	2	0	0	0	0	0	0	0	2	0	0	0	2	360	benzylsuccinate synthase [EC:4.1.99.11]	http://www.genome.jp/dbget-bin/www_bget?ko:K07540	19.1111	2.66667	24	5.33333	0	0.666667
K08766	0	0	0	0	0	0	0	0	0	0	0	0	0	0	0	0	0	0	6	0	4	0	2	0	0	0	0	0	2	2	0	2	0	0	0	2	20	carnitine O-palmitoyltransferase 2 [EC:2.3.1.21]	http://www.genome.jp/dbget-bin/www_bget?ko:K08766	0	0	0	2	0.666667	0.666667
K14029	0	2	2	6	4	0	4	6	8	0	0	0	0	0	0	0	0	14	0	0	0	0	0	0	0	0	0	0	0	0	0	0	0	0	4	0	50	methanol dehydrogenase (cytochrome c) subunit 2 [EC:1.1.2.7]	http://www.genome.jp/dbget-bin/www_bget?ko:K14029	3.55556	0	2.33333	0	0	0.666667
K14481	48	22	36	30	22	12	106	64	42	0	0	0	12	26	4	6	0	8	6	2	4	0	6	12	4	4	4	0	2	4	0	4	0	0	0	0	490	styrene monooxygenase [EC:1.14.14.11]	http://www.genome.jp/dbget-bin/www_bget?ko:K14481	42.4444	0	9.33333	5	3	0.666667
K21759	0	2	0	0	0	0	0	0	2	2	0	0	0	0	0	0	0	0	8	2	0	0	0	2	4	6	2	0	6	16	0	0	0	2	2	0	56	vanillate/4-hydroxybenzoate decarboxylase subunit D [EC:4.1.1.- 4.1.1.61]	http://www.genome.jp/dbget-bin/www_bget?ko:K21759	0.444444	0.666667	0	2	5.66667	0.666667
K22959	0	0	0	0	0	0	0	0	0	0	0	0	2	0	0	0	2	6	0	0	0	0	0	0	0	0	0	0	0	0	0	2	0	0	0	2	14	gallate decarboxylase subunit B	http://www.genome.jp/dbget-bin/www_bget?ko:K22959	0	0	1.66667	0	0	0.666667
K23528	0	0	0	0	0	0	0	0	0	0	0	0	0	0	0	0	0	0	0	0	0	0	0	0	0	0	0	6	0	0	2	0	0	0	2	0	10	p-benzoquinone reductase (NADPH) [EC:1.6.5.6]	http://www.genome.jp/dbget-bin/www_bget?ko:K23528	0	0	0	0	1	0.666667
K00093	0	0	0	0	0	0	0	0	0	0	0	0	0	0	0	0	6	0	0	0	0	0	0	0	0	0	0	0	0	0	0	0	0	0	0	2	8	methanol dehydrogenase [EC:1.1.1.244]	http://www.genome.jp/dbget-bin/www_bget?ko:K00093	0	0	1	0	0	0.333333
K11948	6	0	0	0	2	0	2	0	0	2	0	0	0	0	0	0	0	0	6	4	4	0	2	0	0	2	0	0	0	0	0	0	0	0	2	0	32	1-hydroxy-2-naphthoate dioxygenase [EC:1.13.11.38]	http://www.genome.jp/dbget-bin/www_bget?ko:K11948	1.11111	0.666667	0	2.66667	0.333333	0.333333
K18249	4	4	18	0	0	0	2	8	0	0	0	2	2	0	0	0	0	4	0	0	0	0	0	0	0	0	0	0	0	0	0	0	0	2	0	0	46	anthranilate 1,2-dioxygenase ferredoxin reductase component [EC:1.18.1.-]	http://www.genome.jp/dbget-bin/www_bget?ko:K18249	4	0.666667	1	0	0	0.333333
K23527	2	10	2	4	10	2	18	14	20	0	0	0	2	6	0	0	0	2	20	14	4	30	14	14	38	54	38	28	56	44	0	0	0	0	2	0	448	aromatic O-demethylase, reductase subunit [EC:1.6.2.-]	http://www.genome.jp/dbget-bin/www_bget?ko:K23527	9.11111	0	1.66667	16	43	0.333333
K00081	2	0	10	2	0	0	0	0	4	2	2	0	0	0	0	0	0	0	0	0	0	0	0	0	0	2	0	0	2	0	0	0	0	0	0	0	26	carbonyl reductase 2 [EC:1.1.1.184]	http://www.genome.jp/dbget-bin/www_bget?ko:K00081	2	1.33333	0	0	0.666667	0
K00149	0	6	6	8	2	6	0	6	6	0	0	0	2	0	0	0	0	2	4	0	2	4	4	2	0	0	0	0	0	0	0	0	0	0	0	0	60	aldehyde dehydrogenase family 9 member A1 [EC:1.2.1.47 1.2.1.3]	http://www.genome.jp/dbget-bin/www_bget?ko:K00149	4.44444	0	0.666667	2.66667	0	0
K00152	0	0	0	0	0	0	0	0	0	0	0	0	0	0	0	0	0	0	0	0	0	0	0	0	2	4	0	0	0	0	0	0	0	0	0	0	6	salicylaldehyde dehydrogenase [EC:1.2.1.65]	http://www.genome.jp/dbget-bin/www_bget?ko:K00152	0	0	0	0	1	0
K00530	0	4	2	0	0	2	0	2	0	0	0	0	6	8	0	10	12	4	0	0	0	0	0	0	0	0	0	0	0	0	0	0	0	0	0	0	50	rubredoxin---NAD(P)+ reductase [EC:1.18.1.4]	http://www.genome.jp/dbget-bin/www_bget?ko:K00530	1.11111	0	6.66667	0	0	0
K01909	76	48	38	40	80	34	46	48	84	4	0	6	2	4	2	0	0	4	0	0	0	0	4	0	2	8	4	12	0	4	0	0	0	0	0	0	550	long-chain-fatty-acid--[acyl-carrier-protein] ligase [EC:6.2.1.20]	http://www.genome.jp/dbget-bin/www_bget?ko:K01909	54.8889	3.33333	2	0.666667	5	0
K07420	0	0	0	0	4	0	2	0	6	0	0	0	2	0	0	0	0	2	0	0	0	0	0	0	0	0	0	0	0	2	0	0	0	0	0	0	18	cytochrome P450 family 2 subfamily S1 [EC:1.14.14.1]	http://www.genome.jp/dbget-bin/www_bget?ko:K07420	1.33333	0	0.666667	0	0.333333	0
K07422	0	4	4	8	2	6	0	0	4	0	0	2	10	0	0	0	0	0	0	0	0	0	0	0	0	0	0	0	0	0	0	0	0	0	0	0	40	long-chain fatty acid omega-monooxygenase [EC:1.14.14.80]	http://www.genome.jp/dbget-bin/www_bget?ko:K07422	3.11111	0.666667	1.66667	0	0	0
K07513	2	0	0	0	2	2	0	0	2	0	10	0	2	0	0	0	16	38	2	0	0	0	0	0	2	8	2	0	0	0	0	0	0	0	0	0	88	acetyl-CoA acyltransferase 1 [EC:2.3.1.16]	http://www.genome.jp/dbget-bin/www_bget?ko:K07513	0.888889	3.33333	9.33333	0.333333	2	0
K07534	8	4	6	2	0	2	20	2	0	0	0	0	6	6	12	12	10	12	0	0	0	0	0	6	0	0	0	0	0	0	0	0	0	0	0	0	108	cyclohex-1-ene-1-carboxyl-CoA hydratase [EC:4.2.1.-]	http://www.genome.jp/dbget-bin/www_bget?ko:K07534	4.88889	0	9.66667	1	0	0
K07545	4	2	2	16	4	2	6	4	0	0	0	0	0	0	0	0	0	2	0	0	0	0	8	6	0	0	0	0	0	0	0	0	0	0	0	0	56	(R)-benzylsuccinyl-CoA dehydrogenase [EC:1.3.8.3]	http://www.genome.jp/dbget-bin/www_bget?ko:K07545	4.44444	0	0.333333	2.33333	0	0
K07824	2	2	2	2	10	10	2	0	6	0	0	0	4	0	0	0	0	20	0	0	0	0	0	0	0	0	0	0	0	0	0	0	0	0	0	0	60	benzoate 4-monooxygenase [EC:1.14.14.92]	http://www.genome.jp/dbget-bin/www_bget?ko:K07824	4	0	4	0	0	0
K08689	6	10	16	10	22	4	10	16	16	0	0	0	0	0	2	0	0	2	0	2	2	0	2	0	4	2	2	0	4	6	0	0	0	0	0	0	138	biphenyl 2,3-dioxygenase subunit alpha [EC:1.14.12.18]	http://www.genome.jp/dbget-bin/www_bget?ko:K08689	12.2222	0	0.666667	1	3	0
K10616	0	0	0	0	0	0	0	0	0	2	0	0	0	0	0	0	0	0	0	0	0	0	0	0	0	0	0	0	0	0	0	0	0	0	0	0	2	p-cymene methyl-monooxygenase [EC:1.14.15.25]	http://www.genome.jp/dbget-bin/www_bget?ko:K10616	0	0.666667	0	0	0	0
K10623	2	0	0	6	0	14	2	10	0	0	0	0	0	0	2	0	0	0	0	0	0	0	0	0	0	0	0	0	0	0	0	0	0	0	0	0	36	HOMODA hydrolase [EC:3.7.1.-]	http://www.genome.jp/dbget-bin/www_bget?ko:K10623	3.77778	0	0.333333	0	0	0
K11949	10	6	0	4	6	0	8	12	10	38	18	28	0	2	2	0	0	0	0	2	0	0	10	8	0	0	0	0	0	0	0	0	0	0	0	0	164	4-(2-carboxyphenyl)-2-oxobut-3-enoate aldolase [EC:4.1.2.34]	http://www.genome.jp/dbget-bin/www_bget?ko:K11949	6.22222	28	0.666667	3.33333	0	0
K13942	0	0	0	2	0	0	0	0	0	0	0	0	12	0	0	0	0	0	0	0	0	0	0	0	0	0	0	0	0	0	0	0	0	0	0	0	14	5,10-methenyltetrahydromethanopterin hydrogenase [EC:1.12.98.2]	http://www.genome.jp/dbget-bin/www_bget?ko:K13942	0.222222	0	2	0	0	0
K14334	0	0	0	0	0	0	0	0	0	0	0	0	0	0	0	0	0	12	0	0	0	0	0	0	0	0	0	0	0	0	0	0	0	0	0	0	12	carboxy-cis,cis-muconate cyclase [EC:5.5.1.5]	http://www.genome.jp/dbget-bin/www_bget?ko:K14334	0	0	2	0	0	0
K14583	8	0	0	8	6	0	0	0	0	2	0	0	0	0	0	0	0	0	0	0	0	0	0	0	0	0	0	0	0	0	0	0	0	0	0	0	24	1,2-dihydroxynaphthalene dioxygenase [EC:1.13.11.56]	http://www.genome.jp/dbget-bin/www_bget?ko:K14583	2.44444	0.666667	0	0	0	0
K14600	4	2	2	0	2	0	0	0	2	0	0	0	0	0	0	0	0	0	0	0	0	0	0	0	0	0	0	0	0	0	0	0	0	0	0	0	12	dibenzofuran dioxygenase subunit beta [EC:1.14.12.-]	http://www.genome.jp/dbget-bin/www_bget?ko:K14600	1.33333	0	0	0	0	0
K15236	18	2	0	0	4	0	6	2	2	0	0	0	0	0	4	0	0	0	8	0	0	0	2	2	0	0	0	0	0	0	0	0	0	0	0	0	50	gamma-hexachlorocyclohexane dehydrochlorinase [EC:4.5.1.-]	http://www.genome.jp/dbget-bin/www_bget?ko:K15236	3.77778	0	0.666667	2	0	0
K15239	0	2	2	0	0	0	4	0	0	0	0	0	0	0	0	0	0	0	4	12	14	68	12	18	0	2	0	2	4	0	0	0	0	0	0	0	144	2,5-dichlorohydroquinone reductive dechlorinase [EC:2.5.1.-]	http://www.genome.jp/dbget-bin/www_bget?ko:K15239	0.888889	0	0	21.3333	1.33333	0
K15253	0	0	0	0	0	0	0	0	0	2	4	16	2	0	0	0	0	0	4	2	0	0	0	2	0	0	0	0	0	0	0	0	0	0	0	0	32	chlorocatechol 1,2-dioxygenase [EC:1.13.11.-]	http://www.genome.jp/dbget-bin/www_bget?ko:K15253	0	7.33333	0.333333	1.33333	0	0
K15401	4	10	10	4	0	2	0	0	12	0	0	0	0	0	0	0	0	0	0	0	0	0	0	0	0	0	0	0	0	0	0	0	0	0	0	0	42	long-chain fatty acid omega-monooxygenase [EC:1.14.14.80]	http://www.genome.jp/dbget-bin/www_bget?ko:K15401	4.66667	0	0	0	0	0
K15680	0	0	0	0	0	0	0	0	0	0	0	0	0	2	0	0	0	0	2	2	0	2	8	2	0	8	12	2	12	2	0	0	0	0	0	0	54	corticosteroid 11-beta-dehydrogenase isozyme 1 [EC:1.1.1.146]	http://www.genome.jp/dbget-bin/www_bget?ko:K15680	0	0	0.333333	2.66667	6	0
K15754	0	0	0	0	0	0	0	0	0	0	0	0	0	0	0	0	0	0	0	0	0	0	0	6	0	0	0	0	0	0	0	0	0	0	0	0	6	2'-aminobiphenyl-2,3-diol 1,2-dioxygenase, small subunit [EC:1.13.11.-]	http://www.genome.jp/dbget-bin/www_bget?ko:K15754	0	0	0	1	0	0
K15755	42	28	42	18	20	14	36	20	16	4	0	8	2	4	0	2	0	0	0	0	0	0	0	0	6	2	2	0	0	2	0	0	0	0	0	0	268	2'-aminobiphenyl-2,3-diol 1,2-dioxygenase, large subunit [EC:1.13.11.-]	http://www.genome.jp/dbget-bin/www_bget?ko:K15755	26.2222	4	1.33333	0	2	0
K16160	4	6	2	0	2	4	4	6	6	0	0	0	0	4	0	0	0	0	0	0	0	0	0	0	0	0	0	0	0	0	0	0	0	0	0	0	38	methane monooxygenase regulatory protein B	http://www.genome.jp/dbget-bin/www_bget?ko:K16160	3.77778	0	0.666667	0	0	0
K16256	52	64	46	40	42	32	40	38	66	2	0	8	52	2	18	6	4	8	8	0	0	16	0	0	0	0	0	0	0	0	0	0	0	0	0	0	544	mxaA protein	http://www.genome.jp/dbget-bin/www_bget?ko:K16256	46.6667	3.33333	15	4	0	0
K16258	40	38	46	48	46	34	28	34	62	0	6	2	14	8	12	0	0	14	0	0	0	0	0	0	0	0	0	0	0	0	0	0	0	0	0	0	432	mxaK protein	http://www.genome.jp/dbget-bin/www_bget?ko:K16258	41.7778	2.66667	8	0	0	0
K16259	40	76	86	74	94	84	48	56	102	0	10	4	30	14	20	12	2	10	8	8	2	58	10	26	2	0	0	0	0	2	0	0	0	0	0	0	878	mxaL protein	http://www.genome.jp/dbget-bin/www_bget?ko:K16259	73.3333	4.66667	14.6667	18.6667	0.666667	0
K17048	0	0	0	2	0	0	10	4	6	14	16	14	4	2	0	0	0	0	0	0	0	0	6	2	0	0	0	0	0	0	0	0	0	0	0	0	80	ethylbenzene hydroxylase subunit beta	http://www.genome.jp/dbget-bin/www_bget?ko:K17048	2.44444	14.6667	1	1.33333	0	0
K17049	0	0	0	0	0	0	0	2	0	0	2	8	0	0	0	0	0	2	0	0	0	0	0	0	0	0	0	0	0	0	0	0	0	0	0	0	14	ethylbenzene hydroxylase subunit gamma	http://www.genome.jp/dbget-bin/www_bget?ko:K17049	0.222222	3.33333	0.333333	0	0	0
K17070	0	2	0	0	0	0	0	0	0	8	4	4	54	20	8	22	12	18	0	0	0	0	0	0	0	0	0	0	0	0	0	0	0	0	0	0	152	dichloromethane dehalogenase [EC:4.5.1.3]	http://www.genome.jp/dbget-bin/www_bget?ko:K17070	0.222222	5.33333	22.3333	0	0	0
K17100	2	4	2	0	2	10	2	2	0	0	0	0	4	6	0	0	0	2	0	0	0	0	0	0	0	0	0	0	0	0	0	0	0	0	0	0	36	dihydroxyacetone synthase [EC:2.2.1.3]	http://www.genome.jp/dbget-bin/www_bget?ko:K17100	2.66667	0	2	0	0	0
K18074	18	20	40	22	28	2	44	10	4	0	0	0	6	0	0	2	0	0	4	0	4	0	0	0	0	0	0	0	0	0	0	0	0	0	0	0	204	terephthalate 1,2-dioxygenase oxygenase component alpha subunit [EC:1.14.12.15]	http://www.genome.jp/dbget-bin/www_bget?ko:K18074	20.8889	0	1.33333	1.33333	0	0
K18077	0	0	0	0	0	0	0	0	0	0	2	4	0	0	0	0	0	0	0	0	0	0	0	0	0	0	0	0	0	0	0	0	0	0	0	0	6	terephthalate 1,2-dioxygenase reductase component [EC:1.18.1.-]	http://www.genome.jp/dbget-bin/www_bget?ko:K18077	0	2	0	0	0	0
K18087	4	6	10	4	26	8	14	22	12	12	6	6	6	2	4	0	0	6	0	0	0	0	4	6	0	0	0	0	0	0	0	0	0	0	0	0	158	biphenyl 2,3-dioxygenase ferredoxin component	http://www.genome.jp/dbget-bin/www_bget?ko:K18087	11.7778	8	3	1.66667	0	0
K18089	2	2	4	14	2	4	0	2	0	0	0	0	4	0	0	0	0	2	2	0	0	0	0	0	0	0	0	0	0	0	0	0	0	0	0	0	38	benzene/toluene/chlorobenzene dioxygenase ferredoxin component	http://www.genome.jp/dbget-bin/www_bget?ko:K18089	3.33333	0	1	0.333333	0	0
K18254	0	0	0	0	8	0	0	0	0	0	0	0	0	0	0	0	0	0	0	0	0	0	0	0	0	0	0	0	0	0	0	0	0	0	0	0	8	phthalate 3,4-dioxygenase ferredoxin reductase component [EC:1.18.1.3]	http://www.genome.jp/dbget-bin/www_bget?ko:K18254	0.888889	0	0	0	0	0
K18255	6	6	2	2	6	0	0	2	2	0	0	0	0	0	0	0	0	2	0	0	0	0	0	0	0	0	0	0	0	0	0	0	0	0	0	0	28	phthalate 3,4-cis-dihydrodiol dehydrogenase [EC:1.3.1.-]	http://www.genome.jp/dbget-bin/www_bget?ko:K18255	2.88889	0	0.333333	0	0	0
K18257	0	0	0	0	0	0	0	0	0	0	0	0	0	0	0	4	0	0	0	0	0	0	0	0	0	0	0	0	4	0	0	0	0	0	0	0	8	cis-3,4-dihydrophenanthrene-3,4-diol dehydrogenase [EC:1.3.1.49]	http://www.genome.jp/dbget-bin/www_bget?ko:K18257	0	0	0.666667	0	0.666667	0
K19065	2	4	4	4	30	8	4	10	6	194	128	122	2	4	6	0	0	2	0	0	2	0	0	0	0	0	2	6	4	6	0	0	0	0	0	0	550	3-hydroxybenzoate 4-monooxygenase [EC:1.14.13.23]	http://www.genome.jp/dbget-bin/www_bget?ko:K19065	8	148	2.33333	0.333333	3	0
K20495	0	6	4	4	4	4	4	0	8	8	2	4	0	6	0	12	0	6	4	0	2	30	4	4	4	0	0	0	0	0	0	0	0	0	0	0	120	long-chain fatty acid omega-monooxygenase [EC:1.14.14.80]	http://www.genome.jp/dbget-bin/www_bget?ko:K20495	3.77778	4.66667	4	7.33333	0.666667	0
K20943	0	0	2	0	2	0	6	2	14	0	0	2	0	4	4	0	0	0	0	0	0	0	0	0	0	0	0	0	0	0	0	0	0	0	0	0	36	resorcinol 4-hydroxylase (NADPH) [EC:1.14.13.219]	http://www.genome.jp/dbget-bin/www_bget?ko:K20943	2.88889	0.666667	1.33333	0	0	0
K20990	0	0	0	0	0	0	0	0	4	12	2	2	0	0	2	0	0	0	0	0	0	0	0	0	0	0	0	0	0	0	0	0	0	0	0	0	22	4-sulfomuconolactone hydrolase [EC:3.1.1.92]	http://www.genome.jp/dbget-bin/www_bget?ko:K20990	0.444444	5.33333	0.333333	0	0	0
K21317	6	14	2	4	2	0	20	12	2	0	0	4	0	0	0	0	0	2	0	0	0	0	0	0	0	0	0	0	0	0	0	0	0	0	0	0	68	butane monooxygenase alpha subunit [EC:1.14.13.230]	http://www.genome.jp/dbget-bin/www_bget?ko:K21317	6.88889	1.33333	0.333333	0	0	0
K21726	0	0	0	2	6	0	0	0	0	0	0	0	0	0	0	0	0	2	0	0	0	0	0	0	0	0	0	0	0	0	0	0	0	0	0	0	10	4-nitrophenol 2-monooxygenase / 4-nitrocatechol 4-monooxygenase, oxygenase component [EC:1.14.13.29 1.14.13.166]	http://www.genome.jp/dbget-bin/www_bget?ko:K21726	0.888889	0	0.333333	0	0	0
K21738	0	0	0	0	0	0	0	0	0	0	0	0	0	0	0	0	0	0	2	2	0	0	0	0	0	0	0	0	0	0	0	0	0	0	0	0	4	rubredoxin---NAD+ reductase [EC:1.18.1.1]	http://www.genome.jp/dbget-bin/www_bget?ko:K21738	0	0	0	0.666667	0	0
K22353	2	2	10	2	0	0	10	0	0	0	0	0	0	0	0	0	0	0	0	0	0	0	0	0	0	0	0	0	0	0	0	0	0	0	0	0	26	alkene monooxygenase alpha subunit [EC:1.14.13.69]	http://www.genome.jp/dbget-bin/www_bget?ko:K22353	2.88889	0	0	0	0	0
K22356	14	2	6	14	6	12	2	12	2	0	0	0	8	0	20	0	0	0	0	0	0	0	0	0	0	0	0	0	0	0	0	0	0	0	0	0	98	alkene monooxygenase reductase	http://www.genome.jp/dbget-bin/www_bget?ko:K22356	7.77778	0	4.66667	0	0	0
K22716	6	0	12	0	0	0	0	4	8	0	0	0	0	0	0	2	0	2	0	0	0	0	0	0	0	0	0	0	0	0	0	0	0	0	0	0	34	dibenzofuran dioxygenase subunit beta [EC:1.14.12.-]	http://www.genome.jp/dbget-bin/www_bget?ko:K22716	3.33333	0	0.666667	0	0	0
K23529	0	0	0	0	0	0	0	0	0	0	0	0	0	0	0	0	0	0	8	0	0	0	0	0	0	0	0	0	0	0	0	0	0	0	0	0	8	2-hydroxy-1,4-benzoquinone reductase [EC:1.6.5.7]	http://www.genome.jp/dbget-bin/www_bget?ko:K23529	0	0	0	1.33333	0	0
K23790	0	0	0	2	4	0	0	0	0	0	0	0	0	0	0	0	0	0	2	0	0	0	2	0	0	0	0	0	0	0	0	0	0	0	0	0	10	glutathione S-transferase P [EC:2.5.1.18]	http://www.genome.jp/dbget-bin/www_bget?ko:K23790	0.666667	0	0	0.666667	0	0
K24182	0	0	0	0	0	0	0	0	0	0	0	0	2	4	0	0	0	0	0	0	0	0	0	0	0	0	0	0	0	0	0	0	0	0	0	0	6	6-phosphofructokinase [EC:2.7.1.11]	http://www.genome.jp/dbget-bin/www_bget?ko:K24182	0	0	1	0	0	0
K25934	0	0	0	0	0	0	0	0	0	2	8	2	0	0	0	8	10	6	0	0	0	2	0	0	12	14	10	26	18	42	0	0	0	0	0	0	160	phenyl-phosphate phosphatase/carboxylase subunit gamma [EC:4.1.1.123]	http://www.genome.jp/dbget-bin/www_bget?ko:K25934	0	4	4	0.333333	20.3333	0
																																							sum	821881	544710	658260	528170	908344	773518
																																							4aromatic	184755	95876.7	117659	94534.3	165516	147103
																																							9hydrocarbon	637126	448833	540601	433636	742829	626415
