# Supplementary material for: Divergent microbial community and functional dynamics in mangrove sediments along a polycyclic aromatic hydrocarbons (PAHs) gradient in China
Source: Research Square preprint supplement (doi:10.21203/rs.3.rs-7178259/v1), 2025-09-17
Supplement: Supplementary file 16 [file d6163cf89793c4c0084ae281.xlsx]

## Sheet: cazy_family
#Family	DY_1	DY_2	DY_3	CPT_LW_1	CPT_LW_2	CPT_LW_3	CPT_MZ_1	CPT_MZ_2	CPT_MZ_3	CPT_SW_1	CPT_SW_2	CPT_SW_3	FG_SC_1	FG_SC_2	FG_SC_3	FG_WR_1	FG_WR_2	FG_WR_3	M1_1_1	M1_1_2	M1_1_3	M1_2_1	M1_2_2	M1_2_3	M2_1_1	M2_1_2	M2_1_3	M2_2_1	M2_2_2	M2_2_3	M3_1_1	M3_1_2	M3_1_3	M3_2_1	M3_2_2	M3_2_3	DY	CPT	FG	M1	M2	M3	Total	Percentage	Description
GT41	80188	60450	64998	103078	86386	102410	106768	122244	104412	109378	116694	101630	107308	90934	74222	77376	84010	71452	79320	63870	79746	72020	72340	61304	112522	102386	103676	136518	117652	161630	76162	70964	71312	73434	74582	75688	68545.3	105889	84217	71433.3	122397	73690.3	3269064	0.0970662	UDP-Glc: peptide N-β-glucosyltransferase (EC 2.4.1.-);GDP-L-Fuc: protein O-α-L-fucosyltransferase (EC 2.4.1.221);UDP-GlcNAc: protein O-β-N-acetylglucosaminyltransferase (EC 2.4.1.255);
GT4	43342	32410	32972	59528	50922	64192	66352	71786	66836	67674	71962	65116	77718	60492	46702	54744	55694	46696	44040	39264	49090	56014	34482	28178	92568	86716	87976	87426	78000	110248	67534	61924	61594	70828	76132	65184	36241.3	64929.8	57007.7	41844.7	90489	67199.3	2232336	0.0662833	1L-myo-inositol-1-P α-N-acetylglucoaminyltransferase (EC 2.4.1.-);EPS α-1,6-galactosyltransferase (EC 2.4.1.-);GDP-Man : α-1,4-mannosyltransferase (EC 2.4.1.-);GDP-Man α-mannosyltransferase (EC 2.4.1.-);GDP-Man: α-1,3-mannosyltransferase (EC 2.4.1.-);GDP-Man:queuosine α-mannosyltransferase (EC 2.4.1.-);GDP-Rha: α-1,3-rhamnosyltransferase (EC 2.4.1.-);Hexosyltransferases (EC 2.4.1.-);LPS α-1,6-gal…
CE1	47030	33706	35948	45532	39020	47850	48784	53738	47764	49246	51924	48600	69050	52148	42580	51388	52910	40926	36294	32424	40048	49758	32456	27280	74948	69502	72086	80048	77050	96082	59252	53952	54822	60422	67104	55372	38894.7	48050.9	51500.3	36376.7	78286	58487.3	1897044	0.0563277	Trehalose 6-O-mycolyltransferase (EC 2.3.1.122);Diacylglycerol O-acyltransferase (EC 2.3.1.20);Carboxylic ester hydrolase (EC 3.1.1.-);Acetylxylan esterase (EC 3.1.1.72);Feruloyl esterase (EC 3.1.1.73);
GT2_Glycos_transf_2	38614	27990	30906	48702	42108	52722	54604	60788	53726	55392	60562	55932	62464	47970	37348	47962	51968	40570	33232	29576	36436	42990	26918	22436	69552	64288	66566	70508	61264	85952	52232	48222	48138	54784	58560	49980	32503.3	53837.3	48047	31931.3	69688.3	51986	1791962	0.0532075	GT2's subfamily
GT83	21316	15486	16714	29890	25744	32702	33526	35440	35112	33206	36350	32266	46354	36936	28030	29858	30316	24530	21370	19424	23404	21660	14316	10836	52752	49722	48614	49124	38636	60030	32976	31154	31320	33626	34390	31942	17838.7	32692.9	32670.7	18501.7	49813	32568	1149072	0.0341186	Undecaprenyl phosphate-α-L-Ara4N: 4-amino-4-deoxy-β-L-arabinosyltransferase (EC 2.4.2.43);
AA3	15908	10960	11540	17528	15420	18426	17952	21168	16608	18856	19966	18688	20694	15548	13148	15510	14786	13564	10280	9434	12250	14272	10886	8712	19696	19520	19866	18996	19772	24390	20114	18344	19248	20924	23160	18760	12802.7	18290.2	15541.7	10972.3	20373.3	20091.7	604894	0.0179607	Pyranose:oxygen 2-oxidoreductase / glucose 2-oxidase (EC 1.1.3.10);Alcohol oxidase (EC 1.1.3.13);Ecdysone oxidase (EC 1.1.3.16);Glucose 1-oxidase (EC 1.1.3.4);Aryl alcohol oxidase (EC 1.1.3.7);Oligosaccharide dehydrogenase (FAD) (EC 1.1.5.-);Glucose 1-dehydrogenase (FAD, quinone) (EC 1.1.5.9);Cellobiose dehydrogenase (EC 1.1.99.18);Pyranose dehydrogenase (EC 1.1.99.29);
CE9	14824	12362	11708	19190	16920	19786	19932	22292	18236	20668	20976	19504	20834	16982	13644	14524	13642	13658	14366	12006	14934	15556	14720	12108	20246	18656	19700	17578	19766	23978	18690	16714	16894	17888	18966	16976	12964.7	19722.7	15547.3	13948.3	19987.3	17688	619424	0.0183921	N-acetylglucosamine-6-phosphate deacetylase (EC 3.5.1.25);
AA7	10992	8588	8200	16960	14512	17238	16612	19564	16588	18630	19162	17988	18564	13800	11190	12810	10824	11662	9782	8770	12182	11444	9476	8520	18576	18106	19174	16330	17596	21256	16716	15362	15328	17592	19390	15724	9260	17472.7	13141.7	10029	18506.3	16685.3	535208	0.0158916	Chitooligosaccharide oxidase (EC 1.1.3.-);Glucooligosaccharide oxidase (EC 1.1.3.-);Xylooligosaccharide oxidase (EC 1.1.3.-);Cellooligosaccharide dehydrogenase (EC 1.1.99.-);
GH179	11594	9364	9086	15390	12736	16116	17144	19350	17168	17420	18366	17580	20704	15326	12174	12680	11762	10898	10802	10180	12588	13314	8366	6750	20364	19286	19498	21292	19568	26458	16614	15372	15076	17472	18272	16120	10014.7	16807.8	13924	10333.3	21077.7	16487.7	552250	0.0163976	β-N-acetylhexosaminidase (EC 3.2.1.52);
GT35	11770	9806	9580	12176	10972	13402	14116	15610	14502	14130	15804	15206	15314	12214	10698	10662	11058	9888	11776	10138	11306	13810	9494	7668	20068	19468	19992	18956	18618	23084	16792	15558	15058	16924	17134	15362	10385.3	13990.9	11639	10698.7	20031	16138	508114	0.0150871	[retaining] α-1,4-glucan phosphorylase (EC 2.4.1.1);
GH13_11	6334	5820	5110	8808	7592	9050	8730	10520	8808	9476	9222	9714	11142	8480	7224	7092	6080	6906	6840	6764	8226	10202	6302	4936	12526	13004	13364	10624	12482	13898	15806	14134	14766	16638	17082	14218	5754.67	9102.22	7820.67	7211.67	12649.7	15440.7	357920	0.0106275	GH13's subfamily
GH177	13738	10804	10750	15020	12638	15268	16026	18366	15870	17284	17992	16914	23134	17316	14090	16374	17360	13876	10444	9868	12166	13276	8320	7194	18112	17062	18024	21064	19626	24576	15328	13822	13944	15090	16202	15124	11764	16153.1	17025	10211.3	19744	14918.3	552062	0.016392	Exo-α-sialidase (EC 3.2.1.18);
GH3	10252	8206	8384	9990	9664	12430	12152	12706	13156	12008	12764	13072	13964	9948	8728	10576	11014	9956	8770	7670	9592	11930	6694	5596	19052	18714	19358	20314	19176	23724	12616	11846	11616	13032	13920	11972	8947.33	11993.6	10697.7	8375.33	20056.3	12500.3	444562	0.0132001	[retaining] β-NAcetylglucosaminoside phosphorylase (EC 2.4.1.-);β-glycan phosphorylase (EC 2.4.1.-);MLG exo-β-1,4-glucosidase (EC 3.2.1.-);[retaining] xyloglucan-specific exo-β-1,4-glucosidase (EC 3.2.1.-);α-L-arabinopyranosidase (EC 3.2.1.-);Avenacinase (EC 3.2.1.-);β-1,2-glucosidase (EC 3.2.1.-);β-1,6-glucosidase (EC 3.2.1.-);D-4,5-unsaturated β-glucuronyl hydrolase (EC 3.2.1.-);Exo-β-1,3-1,4-g…
CE7	13560	10126	10554	13346	11496	14340	14184	16094	14028	14192	15204	13668	17204	13422	10554	11568	11098	10756	8332	7250	9314	10112	7922	6632	15472	15074	14960	15772	15040	19738	12744	11388	11050	12902	13842	11924	11413.3	14061.3	12433.7	8260.33	16009.3	12308.3	454862	0.0135059	Carboxylic ester hydrolase (EC 3.1.1.-);Cephalosporin-C deacetylase (EC 3.1.1.41);Acetylxylan esterase (EC 3.1.1.72);
GH2	8876	8582	7752	10052	9338	12322	12736	13484	14980	12296	12964	14392	16810	11638	10276	14516	18046	10914	7676	7452	9708	10444	5886	4588	22884	22158	22412	32016	25932	33242	12848	11730	11464	12542	12686	12182	8403.33	12507.1	13700	7625.67	26440.7	12242	497824	0.0147816	α-L-arabinopyranosidase (EC 3.2.1.-);β-1,3-galactosidase (EC 3.2.1.-);β-galacturonidase (EC 3.2.1.-);β-galacturonidase RGII specific (EC 3.2.1.-);Lactase (EC 3.2.1.108);Glycyrrhizin β-glucuronidase (EC 3.2.1.128);β-D-galactofuranosidase (EC 3.2.1.146);Mannosylglycoprotein endo-β-mannosidase (EC 3.2.1.152);Exo-β-1,4-glucosaminidase (EC 3.2.1.165);β-glucosidase (EC 3.2.1.21);β-galactosidase (EC 3.2…
GH23	11616	8996	9292	9038	8052	9802	10238	11166	10112	10218	10942	10240	10222	8254	7408	9050	10196	8032	9470	7648	9206	9098	8522	6888	16158	14914	15900	16266	15080	19512	11684	10902	11088	11428	13896	11486	9968	9978.67	8860.33	8472	16305	11747.3	392020	0.01164	Chitinase (EC 3.2.1.14);Lysozyme (EC 3.2.1.17);Peptidoglycan lytic transglycosylase / peptidoglycan lyase (EC 4.2.2.-);
GT2_Glyco_tranf_2_3	6504	4522	5090	7316	6020	7576	7806	8666	7520	8204	8668	8252	10858	7956	6826	7180	6958	6210	5438	4932	6246	8196	3944	2938	10178	9474	9390	9700	9280	12274	11240	10240	10304	11542	13442	10498	5372	7780.89	7664.67	5282.33	10049.3	11211	291388	0.00865199	GT2's subfamily
CE4	7568	6056	6046	11430	9320	11138	12000	13722	10966	12918	13438	12182	12658	9184	7608	9550	9758	8318	6520	5350	6804	7464	6138	5202	12046	11778	11850	12388	11614	15316	10624	9720	9904	11266	12818	10260	6556.67	11901.6	9512.67	6246.33	12498.7	10765.3	360922	0.0107166	Chitin oligosaccharide deacetylase (EC 3.1.1.-);Acetylesterase (EC 3.1.1.6);Acetylxylan esterase (EC 3.1.1.72);LPS deacetylase (EC 3.5.1.-);Poly-β-1,6-N-acetylglucosamine deacetylase (EC 3.5.1.-);Peptidoglycan N-acetylglucosamine deacetylase (EC 3.5.1.104);Chitin deacetylase (EC 3.5.1.41);
GT51	8252	6666	6884	9602	8444	10432	10538	11586	9688	10822	10944	11014	10834	8478	7288	8228	8432	8058	7150	6236	7486	7648	6564	5298	10780	10518	10656	11608	11288	14280	10360	9412	9870	11310	12814	9854	7267.33	10341.1	8553	6730.33	11521.7	10603.3	339322	0.0100753	Peptidoglycan glycosyltransferase (EC 2.4.1.129);
GT5	8414	6580	6804	7876	6688	8220	8624	9500	9344	8774	9692	9242	10730	8390	6976	8076	9510	6902	8106	7280	8186	9242	6456	5246	13856	12924	13592	14684	12846	17532	10896	10272	10090	10906	11282	10044	7266	8662.22	8430.67	7419.33	14239	10581.7	343782	0.0102077	α-1,4-glucan synthase (EC 2.4.1.-);Pullulan synthase (EC 2.4.1.-);UDP-Glc glycogen synthase / starch synthase (EC 2.4.1.11);α-1,3-glucan synthase (EC 2.4.1.183);ADP-Glc glycogen synthase / starch synthase (EC 2.4.1.21);NDP-Glc: starch glucosyltransferase (EC 2.4.1.242);
GH74	15528	11502	12976	14402	12802	14596	15368	16620	14394	16334	18002	15212	17098	14506	11656	14312	18700	12798	11802	10308	12602	13936	11678	10046	16156	14422	14922	21304	21456	24294	10484	10174	10416	10044	9936	10190	13335.3	15303.3	14845	11728.7	18759	10207.3	510976	0.0151721	Oligoxyloglucan reducing-end-specific cellobiohydrolase (EC 3.2.1.150);Xyloglucan-specific endo-β-1,4-glucanase / endo-xyloglucanase (EC 3.2.1.151);Endo-β-1,4-glucanase (EC 3.2.1.4);
CE14	6400	5060	5086	8212	7168	8712	8912	9378	9288	9604	10332	9480	11556	8882	7034	7930	6862	7516	5518	5174	6814	7398	4184	3318	10280	9984	10638	9602	10016	12218	10260	9442	9224	10904	11658	9664	5515.33	9009.56	8296.67	5401	10456.3	10192	303708	0.0090178	Diacetylchitobiose deacetylase (EC 3.5.1.-);Chitin disaccharide deacetylase (RE) (EC 3.5.1.105);Mycothiol S-conjugate amidase (EC 3.5.1.115);Chitin disaccharide deacetylase (NRE) (EC 3.5.1.136);N-acetylglucosamine deacetylase (EC 3.5.1.33);N-acetylglucosaminylphosphatidylinositol deacetylase (EC 3.5.1.89);
AA2	7726	5932	6298	6840	6346	7704	7808	8634	7362	7908	8352	7978	9390	7322	6164	7732	7306	6748	8012	6562	7822	8990	7600	6994	10072	9572	10124	10114	10976	12434	10362	9096	9632	10228	10646	9284	6652	7659.11	7443.67	7663.33	10548.7	9874.67	302070	0.00896917	Peroxidases (EC 1.11.1.-);Ascorbate peroxidase (EC 1.11.1.11);Manganese peroxidase (EC 1.11.1.13);Lignin peroxidase (EC 1.11.1.14);Versatile peroxidase (EC 1.11.1.16);Cytochrome-c peroxidase (EC 1.11.1.5);
GH13_9	6502	4922	5168	7380	6392	7768	7794	8488	7258	8268	8326	8302	9368	6956	6114	6348	5836	6010	5728	5152	6280	7780	5596	4766	10020	9808	10030	8624	9584	10536	9812	9366	9542	10636	10510	9272	5530.67	7775.11	6772	5883.67	9767	9856.33	280242	0.00832104	GH13's subfamily
GH149	7148	5786	5650	1718	1544	2038	2176	2102	2882	1720	2036	1962	9734	6934	5846	8318	8970	4810	5328	4714	6336	9954	4324	4330	7742	7464	7752	6344	8508	8820	10680	9196	9482	9958	10226	8936	6194.67	2019.78	7435.33	5831	7771.67	9746.33	221468	0.0065759	β-1,3-glucan phosphorylase (EC 2.4.1.97);
AA1	5774	4592	4416	10108	8706	10088	10016	11398	8952	10756	11266	10454	9878	8330	6792	9006	8068	8114	4834	3870	5098	6106	5518	4560	6764	6764	6906	6730	6330	8194	9252	8218	8270	9844	12370	8416	4927.33	10193.8	8364.67	4997.67	6948	9395	284758	0.00845513	[copper-containing] dihydrogeodin oxidase (EC 1.10.3.-);Laccase / p-diphenol:oxygen oxidoreductase (EC 1.10.3.2);
GH109	8980	7266	7192	9460	8068	9894	10396	12242	10470	10904	11804	10748	14370	10532	8622	10262	11204	8326	7244	6128	7930	8338	5944	5076	12818	11808	11802	15928	13902	18040	9646	8658	8818	9450	9820	9126	7812.67	10442.9	10552.7	6776.67	14049.7	9253	361216	0.0107253	α-N-acetylgalactosaminidase (EC 3.2.1.49);β-N-acetylhexosaminidase (EC 3.2.1.52);
AA3_2	7322	5160	5520	11884	10152	11588	11658	13750	10212	11326	11608	11592	10620	7668	6432	7226	6112	6640	5592	4612	6338	7774	6856	5816	7482	7480	7704	5846	8394	8464	9322	8098	8642	9598	10766	8378	6000.67	11530	7449.67	6164.67	7561.67	9134	303632	0.00901554	AA3's subfamily
GH94	5168	5084	4284	5356	4928	6398	6118	6610	6556	5906	6880	6158	8622	7672	5566	6488	6454	5628	4148	3676	4840	3854	2550	2262	9526	9610	9638	9344	7760	11550	9176	8300	8164	9560	9626	8018	4845.33	6101.11	6738.33	3555	9571.33	8807.33	241478	0.00717005	Acholetin phosphorylase (EC 2.4.1.-);Glucosylgalactose phosphorylase (EC 2.4.1.-);Mixed-linkage β-glucooligosaccharide phosphorylase (EC 2.4.1.-);Cellobiose phosphorylase (EC 2.4.1.20);Chitobiose phosphorylase (EC 2.4.1.280);Laminaribiose phosphorylase (EC 2.4.1.31);Cellobionic acid phosphorylase (EC 2.4.1.321);β-1,2-oligoglucan phosphorylase (EC 2.4.1.333);Solabiose phosphorylase (EC 2.4.1.389);…
GH77	5844	4340	4730	6062	5100	6400	6354	7174	6560	6668	7124	6534	7780	6062	5230	5486	5550	4910	5160	4594	5658	6400	4342	3690	9146	8900	8764	8624	8464	11006	8966	8106	7852	9162	9034	8066	4971.33	6441.78	5836.33	4974	9150.67	8531	243842	0.00724024	[retaining] 4-α-glucanotransferase / amylomaltase (EC 2.4.1.25);
GH39	2518	2464	2030	5126	4456	5916	5424	5454	6348	5046	5738	5022	9934	7654	5792	5556	5538	4120	3778	3764	4666	3982	1968	1692	10280	9386	9720	9094	7510	11600	7964	7700	7604	9030	9306	8052	2337.33	5392.22	6432.33	3308.33	9598.33	8276	221232	0.0065689	3-O-β-L-arabinopyranosyl-α-L-arabinofuranosidase (EC 3.2.1.-);Endo-α-L-rhamnosidase (EC 3.2.1.-);β-glucosidase (EC 3.2.1.21);3-O-α-D-galactosyl-α-L-arabinofuranosidase (EC 3.2.1.215);β-galactosidase (EC 3.2.1.23);Xylan β-1,4-xylosidase (EC 3.2.1.37);Exo-β-1,4-glucanase / cellodextrinase (EC 3.2.1.74);α-L-iduronidase (EC 3.2.1.76);
AA4	7514	5300	5702	7224	6456	7724	8400	9004	7912	8678	9040	8006	9720	7418	5866	6474	6152	5706	5744	4650	5658	6762	5322	4430	9150	8722	8898	10604	9058	12286	8300	7350	7272	8302	8652	7448	6172	8049.33	6889.33	5427.67	9786.33	7887.33	270904	0.00804377	Vanillyl-alcohol oxidase (EC 1.1.3.38);
GH33	6730	4832	5330	7158	5934	7496	8014	8772	7796	8122	8806	7606	11918	9282	7014	9252	11188	7160	4390	4240	5432	5782	4288	3178	9406	9052	9288	13846	11458	14198	7930	7350	7326	7750	7766	7706	5630.67	7744.89	9302.33	4551.67	11208	7638	282796	0.00839687	Trans-sialidase (EC 2.4.1.-);2-keto-3-deoxynononic acid hydrolase / KDNase (EC 3.2.1.-);Kdo hydrolase (EC 3.2.1.124);Exo-α-sialidase (EC 3.2.1.18);Anhydrosialidase (EC 4.2.2.15);
GH1	2902	2670	2406	4202	3634	5262	4450	4878	5126	4770	5008	5840	6932	5092	4416	4998	4288	4684	2704	2574	3230	3856	1732	1610	4788	5042	5142	4188	4384	5820	6900	6116	6046	7706	9288	6472	2659.33	4796.67	5068.33	2617.67	4894	7088	169156	0.00502264	[retaining] anthocyanin 5-O-glucosyltransferase / 5-O-transglucosidase (EC 2.4.1.-);[retaining] anthocyanin 7-O-glucosyltransferase / 7-O-transglucosidase (EC 2.4.1.-);[retaining] β-transglucosidase (EC 2.4.1.-);α-L-arabinopyranosidase (EC 3.2.1.-);β-1,2-glucosidase (EC 3.2.1.-);β-rutinosidase /α-L-rhamnose-(1,6)-β-D-glucosidase (EC 3.2.1.-);Isoflavone 7-O-glucosyl β-glucosidase (EC 3.2.1.-);3-a-…
CE3	5542	4220	4158	5446	4746	5896	6014	7402	5808	6338	6940	6654	6542	4598	3830	5144	5662	4526	4042	3588	4506	5398	3486	2776	8318	8182	8262	7966	7964	10570	6952	6554	6404	7110	7634	6668	4640	6138.22	5050.33	3966	8543.67	6887	215846	0.00640897	Acetylesterase (EC 3.1.1.6);Acetylxylan esterase (EC 3.1.1.72);
GH13_16	3420	3052	2894	5512	4682	5280	5412	6432	4914	6098	6176	5770	6136	4866	4330	4472	3448	4706	3122	2910	3648	3968	3146	2500	5366	5258	5436	4554	5124	6474	6818	5818	6056	6850	7368	5978	3122	5586.22	4659.67	3215.67	5368.67	6481.33	177994	0.00528506	GH13's subfamily
GT20	4174	3382	3308	5570	4840	5818	6094	6744	5336	6220	6510	6280	6872	5054	3996	4834	4276	4490	3964	3462	4546	5856	3950	3160	6354	6192	6528	6466	6144	8066	6350	5770	6048	6724	7172	5858	3621.33	5934.67	4920.33	4156.33	6625	6320.33	196408	0.00583181	[retaining] GDP-valeniol: validamine 7-phosphate valeniolyltransferase (EC 2.-.-.-);α,α-trehalose-6-phosphate synthase (UDP-forming) (EC 2.4.1.15);Glucosylglycerol-phosphate synthase (EC 2.4.1.213);α,α-trehalose-6-phosphate synthase (GDP-forming) (EC 2.4.1.36);Trehalose-6-P phosphatase (EC 3.1.3.12);
GT39	2414	2286	2058	4488	3962	4584	4680	5006	4884	4372	4600	4276	6416	5156	3950	4118	3920	3584	2830	2692	3672	3268	1716	1328	6134	6052	5994	5232	5056	6690	6198	5804	5688	6542	6746	5894	2252.67	4539.11	4524	2584.33	5859.67	6145.33	162290	0.00481877	Dol-P-Man:protein mannosyltransferase (EC 2.4.1.109);
GH65	2688	2482	2256	4686	4104	5002	5014	5682	4876	4934	4882	5244	5654	4116	3790	3922	4230	3580	4312	3960	5074	6506	4124	3410	7476	7642	7596	7592	8450	9644	6312	5448	5292	6340	7214	5624	2475.33	4936	4215.33	4564.33	8066.67	6038.33	189158	0.00561654	α-glucan phosphorylase (EC 2.4.1.-);[inverting] a,α-trehalose-6-phosphate phosphorylase (EC 2.4.1.216);Kojibiose phosphorylase (EC 2.4.1.230);[inverting] nigerose phosphorylase (EC 2.4.1.279);[inverting] 3-O-α-glucopyranosyl-L-rhamnose phosphorylase (EC 2.4.1.282);1,2-α-glucosylglycerol phosphorylase (EC 2.4.1.332);1,3-α-oligoglucan phosphorylase (EC 2.4.1.334);α,α-trehalose phosphorylase (EC 2.4…
GT28	4428	3384	3606	4298	3666	4732	4582	5370	4868	4896	5378	4922	6514	4614	4076	4822	5596	4224	4286	3724	4342	5440	3612	2918	6764	6712	6634	7430	6714	9486	5984	5332	5332	6156	6506	5456	3806	4745.78	4974.33	4053.67	7290	5794.33	186804	0.00554665	UDP-Glc: 1,2-diacylglycerol 3-glucosyltransferase (EC 2.4.1.157);UDP-GlcNAc: undecaprenyldiphospho-muramoylpentapeptide β-1,4-N-acetylglucosaminyltransferase (EC 2.4.1.227);Digalactosyldiacylglycerol synthase (EC 2.4.1.241);Monogalactosyldiacylglycerol synthase (EC 2.4.1.46);
PL22	10312	7444	8292	12544	10806	11824	12474	14588	11632	15402	15620	12976	10808	9608	7248	8004	8490	8372	5920	5330	6972	6290	6878	5460	8984	7782	7790	10998	9928	13158	5648	5592	5626	5760	5888	5980	8682.67	13096.2	8755	6141.67	9773.33	5749	326428	0.00969241	Oligogalacturonate lyase / oligogalacturonide lyase (EC 4.2.2.6);
GH57	3508	2576	2900	2906	2532	3252	3474	3720	3890	4124	4664	3982	4388	3628	2796	3742	4602	3230	3386	2846	3188	4254	2412	1746	6532	6130	6290	7856	5662	8022	5664	5356	5254	6224	5936	5248	2994.67	3616	3731	2972	6748.67	5613.67	155920	0.00462963	[retaining] α-1,4-glucan branching enzyme (EC 2.4.1.18);[retaining] 4-α-glucanotransferase / amylomaltase (EC 2.4.1.25);[retaining] α-amylase (EC 3.2.1.1);[retaining] maltogenic α-amylase (EC 3.2.1.133);α-galactosidase (EC 3.2.1.22);[retaining] pullulanase (EC 3.2.1.41);[retaining] cyclomaltodextrinase (EC 3.2.1.54);
GT1	3238	2594	2572	5188	4488	5438	5468	5726	5538	5304	5798	5616	8064	6214	4844	5344	4840	4614	2900	2582	3368	3656	2638	2282	5346	5334	5676	4914	4646	6432	5290	4808	5064	6014	6072	5294	2801.33	5396	5653.33	2904.33	5391.33	5423.67	173204	0.00514283	C-glycosyltransferase (EC 2.4.-.-);Hexosyltransferases (EC 2.4.1.-);TDP-D-desosamine: macrolide D-desosaminyltransferase (EC 2.4.1.-);UDP-Arap: flavone-C-arabinosytransferase (EC 2.4.1.-);UDP-Glc: 6-hydroxyflavone β-glucosyltransferase (EC 2.4.1.-);UDP-Glc: 7-deoxyloganetic acid β-glucosyltransferase (EC 2.4.1.-);UDP-Glc: 7-deoxyloganetin β-glucosyltransferase (EC 2.4.1.-);UDP-Glc: anthocyanin 5-…
CBM48	2568	2142	2182	4004	3386	4470	4534	5164	4550	4198	4458	4340	5120	3978	3448	3316	3174	3134	3686	3100	3796	4274	2904	2150	6256	6036	5738	5524	6062	7522	5340	4700	5204	5718	5848	5076	2297.33	4344.89	3695	3318.33	6189.67	5314.33	157100	0.00466467	Modules of approx. 100 residues with glycogen-binding function, appended to GH13 modules. Also found in the beta subunit (glycogen-binding) of AMP-activated protein kinases (AMPK)
CE19	3380	2964	2744	5156	4568	5198	5640	6376	5710	5498	5972	5562	6712	5008	3846	4318	3950	3976	3170	2754	3738	3898	3098	2588	6978	6898	6794	6830	6802	9360	5166	4612	4846	5228	5466	5010	3029.33	5520	4635	3207.67	7277	5054.67	179814	0.0053391	Pectin methylesterase (EC 3.1.1.11);
GH103	3744	3088	2770	5260	4298	5266	5416	6664	5012	5478	5364	5302	5116	3262	3070	3468	3500	3078	4136	3352	3970	4382	3750	2872	6274	5728	6358	5046	5868	6938	4608	4232	4556	5178	5640	4620	3200.67	5340	3582.33	3743.67	6035.33	4805.67	166664	0.00494864	Peptidoglycan lytic transglycosylase / peptidoglycan lyase (EC 4.2.2.-);
GH13_3	2160	1638	1998	3014	2592	3034	3236	3480	2860	3542	3498	3540	3478	2626	2272	2384	2270	2482	2094	2106	2408	2624	2020	1444	3562	3386	3544	3288	3650	4164	4740	4708	4552	5046	5272	4286	1932	3199.56	2585.33	2116	3599	4767.33	112998	0.00335518	GH13's subfamily
GH18	1974	1650	1498	1140	990	1280	1318	1256	1314	1294	1324	1224	3618	2392	2048	2374	2282	1660	1566	1292	1914	2080	1046	722	2692	2762	2882	2924	3292	3818	4760	4404	4132	4878	5062	4188	1707.33	1237.78	2395.67	1436.67	3061.67	4570.67	85050	0.00252533	Nod factor hydrolase (EC 3.2.1.-);Chitin exo-β-1,4-N-acetylglucosaminidase (EC 3.2.1.-);Di-N-acetylchitobiase / reducing-end exo-hexosaminidase (EC 3.2.1.-);Peptidoglycan endo-β-1,4-N-acetylglucosaminidase (EC 3.2.1.-);Chitosanase (EC 3.2.1.132);Chitinase (EC 3.2.1.14);Chitin exo-β-1,4-N-acetylglucobiosaminidase (EC 3.2.1.200);[reducing end] exo-chitinase (EC 3.2.1.201);β-N-acetylhexosaminidase (…
GH78	3726	3142	2828	5992	5866	7330	7266	7328	8834	7360	7742	8508	7176	5090	4344	5592	6206	5090	2364	2398	3000	2880	1916	1666	11728	11508	11332	13804	11280	15460	4486	4004	4348	4664	4628	4556	3232	7358.44	5583	2370.67	12518.7	4447.67	225442	0.0066939	Isoflavone 7-O-glucosyl α-1,6-rhamnosidase (EC 3.2.1.-);Rhamnogalacturonan α-L-rhamnohydrolase (EC 3.2.1.174);α-L-rhamnosidase (EC 3.2.1.40);
GH15	2322	2038	1894	7708	6712	7546	7926	9240	6896	9526	8912	8406	5940	4878	3704	4468	3404	5442	3128	2730	3528	3994	3526	2976	5754	5714	5710	5990	5916	7862	4388	4080	4072	4742	4916	3982	2084.67	8096.89	4639.33	3313.67	6157.67	4363.33	189970	0.00564065	Dextran dextrinase (EC 2.4.1.2);[inverting] α-1,6-glucosidase / isomaltase (EC 3.2.1.205);α,α-trehalase (EC 3.2.1.28);[inverting] glucoamylase (EC 3.2.1.3);Glucodextranase (EC 3.2.1.70);
GT9	6028	4064	4766	5226	4656	5564	6464	7184	5790	6792	7386	5978	5890	4478	3916	4008	5962	3846	4450	3706	4684	3656	3884	2890	6432	6094	6196	9404	6814	9820	4594	4436	4460	4180	4028	4274	4952.67	6115.56	4683.33	3878.33	7460	4328.67	192000	0.00570093	LPS β-N-acetylglucosaminyltransferase (EC 2.4.1.56);LOS α-1,6-heptosyltransferase (EC 2.4.99.-);LPS α-1,6-heptosyltransferase (EC 2.4.99.-);Heptosyltransferase (EC 2.4.99.-);
CBM50	2620	2558	2460	3694	3446	4148	4100	3982	4168	3454	3882	3640	4558	4054	3364	3820	4012	3310	3314	2996	3638	3532	2990	2492	5192	4784	4992	4598	4498	5984	4124	3816	3926	4316	5088	4218	2546	3834.89	3853	3160.33	5008	4248	139768	0.00415004	Modules of approx. 50 residues found attached to various enzymes from families GH18, GH19, GH23, GH24, GH25 and GH73, i.e. enzymes cleaving either chitin or peptidoglycan. Binding to chitopentaose demonstrated in the case of Pteris ryukyuensis chitinase A [Ohnuma T et al. (2008) J. Biol. Chem. 283:5178-87 (PMID: 18083709)]. CBM50 modules are also found in a multitude of other enzymes targeting th…
GH29	3696	3614	2970	3056	2508	3580	3618	3944	4446	3920	4272	4238	5580	4118	3754	4550	6318	3394	2778	2620	3430	3136	1842	1480	6994	6534	6918	11168	8964	11248	4240	4128	4182	4114	4248	4088	3426.67	3731.33	4619	2547.67	8637.67	4166.67	163688	0.00486028	α-1,3-L-galactosidase (EC 3.2.1.-);α-1,4-L-fucosidase (EC 3.2.1.-);α-L-galactosidase (EC 3.2.1.-);α-L-glucosidase (EC 3.2.1.-);α-1,3-L-fucosidase (EC 3.2.1.111);α-1,6-L-fucosidase (EC 3.2.1.127);α-L-fucosidase (EC 3.2.1.51);α-1,2-L-fucosidase (EC 3.2.1.63);
AA6	3450	2782	3050	3010	2952	3734	4042	4250	4718	3522	4230	3646	5050	4002	3300	5022	5350	4378	4514	3912	4432	4144	3094	2534	6864	6408	6840	7952	6374	9344	4006	3856	3778	4320	4814	4060	3094	3789.33	4517	3771.67	7297	4139	161734	0.00480226	P-benzoquinone reductase (NADPH) (EC 1.6.5.6);
GH13_18	1864	1856	1708	2724	2370	3424	3370	3466	3842	2920	3248	3588	3110	2496	2142	2108	2018	2160	3508	3240	3618	4680	2618	1788	7308	6884	7532	5414	5728	7220	4408	4010	3822	4196	4318	3916	1809.33	3216.89	2339	3242	6681	4111.67	132622	0.00393786	GH13's subfamily
CBM66	3530	3086	2936	4302	3890	4580	4678	5460	4886	4684	5146	4746	6824	5284	4370	4974	5200	4064	2990	3016	3610	3282	2314	1824	5694	5268	5300	6346	5994	7632	4312	3842	3966	4124	4302	4040	3184	4708	5119.33	2839.33	6039	4097.67	160496	0.0047655	The CBM66 module, derived from the Bacillus subtilis exo-acting β-fructosidase SacC, targets the terminal fructoside residue of fructans.
GH16_3	4032	3310	3140	1116	1162	1554	1536	1634	1892	1256	1448	1448	5220	3978	3122	5010	6158	3388	2790	2414	3098	5098	2476	2442	3748	3582	3624	4518	4426	5184	4318	3914	3898	4014	4396	4042	3494	1449.56	4479.33	3053	4180.33	4097	118386	0.00351516	GH16's subfamily
GH36	2112	1952	1686	1780	1512	2344	2370	2346	2664	2424	2634	3002	3904	2638	2420	3104	2968	2720	2000	1850	2280	2884	1460	1138	4710	4634	4718	4436	4860	5578	3968	3764	3688	4312	4804	3850	1916.67	2341.78	2959	1935.33	4822.67	4064.33	109514	0.00325173	Stachyose synthase / galactinol-raffinose galactosyltransferase (EC 2.4.1.67);Raffinose synthase / galactinol-sucrose galactosyltransferase (EC 2.4.1.82);α-galactosaminidase (EC 3.2.1.-);Blood group B α-1,3-galactosidase (EC 3.2.1.-);Raffinose exo-α-1,6-galactosidase (EC 3.2.1.-);α-galactosidase (EC 3.2.1.22);α-N-acetylgalactosaminidase (EC 3.2.1.49);[retaining] β-L-arabinopyranosidase / β-L-arab…
GH63	2108	1688	1792	3932	3446	4134	4066	4308	3866	3702	4014	3918	4480	3432	2824	3118	2464	2768	2038	2076	2656	2390	1400	1222	3258	3048	3192	2852	2512	3764	4008	3818	3832	4350	4570	3784	1862.67	3931.78	3181	1963.67	3104.33	4060.33	114830	0.00340957	Mannosyl-oligosaccharide α-glucosidase (EC 3.2.1.106);Mannosylglycerate α-mannosidase / mannosylglycerate hydrolase (EC 3.2.1.170);α-glucosidase (EC 3.2.1.20);Glucosylglycerate hydrolase (EC 3.2.1.208);Exo-α-1,3-glucanase / α-1,3-glucosidase (EC 3.2.1.84);
GH13_13	882	956	682	1844	1794	2468	2336	2374	2748	1986	2070	2720	4894	3414	3124	2984	2478	2374	2406	2216	2660	3296	1796	1548	3842	3560	3500	2878	3432	3804	4114	3850	3720	4166	4452	3872	840	2260	3211.33	2320.33	3502.67	4029	101240	0.00300605	GH13's subfamily
GT2_Glyco_trans_2_3	2866	2378	2544	4340	3736	4690	4712	4986	4598	4584	4924	4990	5276	4094	3526	4086	4246	3586	2952	2252	3102	3546	2630	2392	3962	3630	3756	4098	4276	5208	3728	3570	3542	3998	4402	3540	2596	4617.78	4135.67	2812.33	4155	3796.67	138746	0.00411969	GT2's subfamily
GH13_4	1794	1372	1390	2114	1968	2618	2430	2404	3042	2252	2372	2612	3688	2776	2344	2774	2842	2172	2364	2314	2650	3400	2206	1600	5562	5340	5908	4236	4778	5484	3790	3252	3274	3630	3612	3560	1518.67	2423.56	2766	2422.33	5218	3519.67	109924	0.0032639	GH13's subfamily
GH13_10	1048	1216	942	3270	2620	3280	3328	3702	3012	3586	3566	3376	3214	2578	2262	2600	2568	2774	1996	1838	2060	2836	1528	1352	4056	4008	3792	3632	3804	4874	3440	3134	3124	3754	3650	3050	1068.67	3304.44	2666	1935	4027.67	3358.67	104870	0.00311384	GH13's subfamily
AA3_1	2690	2214	2298	3568	3274	3792	3772	4136	3702	3782	3770	3796	3638	3300	2734	2802	2528	2710	2592	2138	2858	2872	2510	2344	3240	3186	3234	3102	3298	4444	3308	2900	3116	3372	3746	3072	2400.67	3732.44	2952	2552.33	3417.33	3252.33	113838	0.00338012	AA3's subfamily
GH119	2058	2310	1494	2286	2012	2574	2772	3172	2624	2882	3206	2832	2740	2726	1898	2214	2502	1724	1912	1686	2408	2316	1622	1342	2888	3024	3002	3784	3302	4114	3520	3160	3052	2968	3330	3020	1954	2706.67	2300.67	1881	3352.33	3175	94476	0.00280521	[retaining] α-amylase (EC 3.2.1.1);
GH106	2938	3188	2434	3252	2798	3732	4330	4352	5304	4520	4984	4456	6038	4478	3608	4666	6062	3710	1978	1780	2246	2380	1342	1196	7482	7318	7250	12288	8838	12502	3344	3000	2994	2978	3084	3166	2853.33	4192	4760.33	1820.33	9279.67	3094.33	160016	0.00475125	Rhamnogalacturonan α-L-rhamnohydrolase (EC 3.2.1.174);α-L-rhamnosidase (EC 3.2.1.40);
GH13_30	388	552	304	798	790	1176	754	898	912	846	786	1338	1288	698	694	926	496	926	740	790	1196	1646	798	586	1822	2068	2066	1422	1972	1916	3358	2692	2730	3454	3644	2584	414.667	922	838	959.333	1877.67	3077	50054	0.00148622	GH13's subfamily
AA5	2640	2158	2098	4018	3436	4278	4540	5102	4328	4934	5144	4782	5432	4532	4334	3416	3494	3118	3050	2710	3316	3444	2294	1920	6568	6028	6044	6480	5804	7988	2950	3026	3028	3092	3278	3044	2298.67	4506.89	4054.33	2789	6485.33	3069.67	145848	0.00433057	Raffinose oxidase (EC 1.1.3.-);Alcohol oxidase (EC 1.1.3.13);5-(hydroxymethyl)furfural oxidase (EC 1.1.3.47);Aryl alcohol oxidase (EC 1.1.3.7);Galactose oxidase (EC 1.1.3.9);Glyoxal oxidase (EC 1.2.3.15);
GT19	3166	2422	2446	2936	2498	2866	3302	3596	3016	3250	3618	3254	3836	2698	2244	3260	3774	2564	2654	2120	2332	3578	2542	2042	4126	4046	3956	5402	4442	6114	2938	2632	2840	2934	3812	3076	2678	3148.44	3062.67	2544.67	4681	3038.67	116332	0.00345417	Lipid-A-disaccharide synthase (EC 2.4.1.182);
CBM9	4854	3330	3614	4224	3572	4142	4848	5142	4056	5188	5244	4248	5360	4450	3418	4356	5010	3538	2812	2384	3162	3468	2854	2300	5560	5398	5296	8468	6496	8724	3054	3010	2892	2966	2884	3090	3932.67	4518.22	4355.33	2830	6657	2982.67	153412	0.00455516	Modules of approx. 170 residues found so far only in xylanases. The cellulose-binding function has been demonstrated in one case.
GH13_20	1782	1308	1468	1738	1438	1824	1818	1998	2240	1690	2186	1924	3680	2856	2190	2940	3258	1956	1244	1162	1398	2074	900	700	2468	2190	2206	2658	2226	3382	2826	2676	2818	3080	3356	2748	1519.33	1872.89	2813.33	1246.33	2521.67	2917.33	78406	0.00232806	GH13's subfamily
GT81	2456	1980	1990	3158	2792	3390	3576	3994	3694	3964	4124	3904	3066	2466	1958	2262	2058	2242	2676	2286	2818	2622	1950	1438	3786	3814	4068	4968	3998	5468	2900	2654	2660	3032	3190	2764	2142	3621.78	2342	2298.33	4350.33	2866.67	110166	0.00327109	Hexosyltransferases (EC 2.4.1.-);Mannosyl-3-phosphoglycerate synthase / [retaining] GDP-Man: 3-phosphoglycerate α-mannosyltransferase (EC 2.4.1.217);NDP-Glc: glucosyl-3-phosphoglycerate synthase (EC 2.4.1.266);UDP-Glc: glucosyl-3-phosphoglycerate synthase (EC 2.4.1.266);[retaining] ADP-Glc: glucosylglycerate synthase (EC 2.4.1.270);
GH20	1824	1426	1604	1354	1242	1624	1644	1688	1664	1546	1606	1606	2470	1664	1424	2358	3254	1726	1076	1028	1266	1402	768	706	3588	3228	3244	4992	3742	5072	3216	2582	2652	3028	3038	2592	1618	1552.67	2149.33	1041	3977.67	2851.33	78944	0.00234403	β-1,6-N-acetylglucosaminidase (EC 3.2.1.-);β-N-acetyl-6-sulfo-glucosaminidase (EC 3.2.1.-);Lacto-N-biosidase (EC 3.2.1.140);β-N-acetylhexosaminidase (EC 3.2.1.52);Mannosyl-glycoprotein endo-β-N-acetylglucosaminidase (EC 3.2.1.96);
GH13	1626	1484	1326	1806	1472	2310	2198	2396	2488	1892	2328	2386	3332	2666	2202	3230	4450	2524	1682	1492	1716	2596	1404	1100	2800	2558	2678	4884	3248	5016	2752	2716	2614	3058	3200	2602	1478.67	2141.78	3067.33	1665	3530.67	2823.67	90232	0.0026792	-
GH32	1274	1314	994	1494	1292	1684	1618	1904	1842	1762	1804	1904	2856	2086	1812	2122	2486	1638	1234	926	1322	1512	872	854	3740	3322	3580	3622	3238	4152	2938	2268	2504	3096	3516	2580	1194	1700.44	2166.67	1120	3609	2817	77162	0.00229112	[retaining] cycloinulo-oligosaccharide fructanotransferase (EC 2.4.1.-);[retaining] sucrose:sucrose 6-fructosyltransferase (6-SST) (EC 2.4.1.-);Sucrose 6 acetate β-2,1-fructosyltransferase (EC 2.4.1.-);[retaining] levansucrase / sucrose:fructan 6-fructosyltransferase (6-SFT) (EC 2.4.1.10);[retaining] fructan:fructan 1-fructosyltransferase (1-FFT) (EC 2.4.1.100);[retaining] fructan:fructan 6-fruct…
GH13_26	834	862	750	2610	2322	2698	2650	3462	2632	3254	2886	3034	2040	1818	1578	1568	966	1758	1416	1298	1560	1684	1310	914	2852	2930	3080	2518	2624	3572	2878	2512	2626	2892	3086	2314	815.333	2838.67	1621.33	1363.67	2929.33	2718	79788	0.00236909	GH13's subfamily
GH4	1458	1358	1414	1566	1694	2028	2022	2050	2408	1952	2054	2076	3648	2608	2112	2602	2254	2000	1574	1336	2068	1682	890	764	3442	3310	3350	3240	2736	4044	2584	2380	2546	2868	3048	2610	1410	1983.33	2537.33	1385.67	3353.67	2672.67	81776	0.00242812	6-P-α-glucosidase (EC 3.2.1.122);α-glucuronidase (EC 3.2.1.139);α-glucosidase (EC 3.2.1.20);β-glucosidase (EC 3.2.1.21);α-galactosidase (EC 3.2.1.22);Galacturonan α-1,4-galacturonidase (EC 3.2.1.67);6-P-β-glucosidase (EC 3.2.1.86);
CE11	3024	2286	2484	2704	2696	3080	3014	3552	2932	3324	3534	3270	3650	2540	2186	3010	3542	2382	2100	1796	1960	2572	2380	2140	3742	3540	3646	4444	3820	4918	2454	2388	2612	2588	3070	2648	2598	3122.89	2885	2158	4018.33	2626.67	106028	0.00314822	UDP-3-O-acyl N-acetylglucosamine deacetylase (EC 3.5.1.108);
GT30	2844	2114	2212	1992	1800	2318	2500	2766	2492	2462	2662	2454	2664	1980	1754	2270	2760	1926	2344	1808	1966	2580	1870	1728	3868	3650	3932	4824	4254	5534	2502	2390	2308	2538	2908	2564	2390	2382.89	2225.67	2049.33	4343.67	2535	95538	0.00283675	[inverting] CMP-β-KDO: α-3-deoxy-D-manno-octulosonic-acid (KDO) transferase (EC 2.4.3.-);
GH171	2872	2014	2324	2338	1776	2590	2616	2948	2636	2982	2976	2740	2992	2452	2072	2920	3562	2308	1966	1620	1950	2060	1620	1148	3872	3574	3890	5998	4262	5940	2342	2298	2332	2554	2652	2438	2403.33	2622.44	2717.67	1727.33	4589.33	2436	99634	0.00295837	Peptidoglycan β-N-acetylmuramidase (EC 3.2.1.92);
GH13_36	594	390	386	502	528	754	798	782	870	564	762	666	1678	1500	1220	1274	1356	854	666	526	854	926	390	300	1100	1024	1112	1200	1152	1670	2510	2200	2336	2528	2746	2116	456.667	691.778	1313.67	610.333	1209.67	2406	40834	0.00121246	GH13's subfamily
GH38	988	1162	944	1096	1072	1336	1246	1504	1504	1178	1500	1464	2848	2576	1878	2480	2586	1522	1210	1234	1624	1462	866	730	2616	2462	2522	3476	2856	3776	2374	2204	2244	2522	2506	2324	1031.33	1322.22	2315	1187.67	2951.33	2362.33	67892	0.00201587	Mannosyl-1-phosphodiester α-1,P-mannosidase (EC 3.2.1.-);Mannosyl-oligosaccharide α-1,3-mannosidase (EC 3.2.1.-);Mannosyl-oligosaccharide α-1,2-mannosidase (EC 3.2.1.113);Mannosyl-oligosaccharide α-1,3-1,6-mannosidase (EC 3.2.1.114);Mannosyl-oligosaccharide α-1,6-mannosidase / exo-α-1,6-mannosidase (EC 3.2.1.163);α-mannosidase (EC 3.2.1.24);
PL9	1654	1262	1266	2234	1984	2412	2392	2774	2518	2372	2664	2386	3428	2806	2214	3018	3094	2180	1490	1410	1910	1900	1206	1094	3480	2970	2904	3764	2840	4586	2398	2106	2274	2378	2402	2332	1394	2415.11	2790	1501.67	3424	2315	86102	0.00255657	Thiopeptidoglycan lyase (EC 4.2.2.-);Pectin lyase (EC 4.2.2.10);Pectate lyase (EC 4.2.2.2);Rhamnogalacturonan endolyase (EC 4.2.2.23);Exo-polygalacturonate lyase (EC 4.2.2.9);
CBM67	1306	1432	1192	2598	2444	3304	3296	3656	3708	3244	3432	3602	4356	3044	2434	2342	2458	2112	1366	1464	1944	1990	1266	1130	4626	4184	4324	4754	4438	5610	2474	2076	2080	2426	2488	2316	1310	3253.78	2791	1526.67	4656	2310	100916	0.00299643	Fujimoto et al. [PMID : 23486481] disclosed the L-rhamnose binding activity and 3-D structure of the CBM67 of Streptomyces avermitilis α-L-rhamnosidase (SaRha78A);
CBM32	1332	1616	1168	2994	2560	3068	3020	3650	3242	3344	3494	3416	3558	2934	2336	2728	3008	2380	1254	1156	1402	1450	1202	986	2510	2270	2390	4002	3232	4330	2246	2102	2130	2382	2416	2280	1372	3198.67	2824	1241.67	3122.33	2259.33	89588	0.00266008	Binding to galactose and lactose has been demonstrated for the module of Micromonospora viridifaciens sialidase (PMID: 16239725). Binding to polygalacturonic acid has been shown for a Yersinia member (PMID: 17292916). Binding to LacNAc (β-D-galactosyl-1,4-β-D-N-acetylglucosamine) has been shown for an N-acetylglucosaminidase from Clostridium perfingens (PMID: 16990278).
GH5	1234	978	1044	1900	1738	2226	2194	2528	2210	2022	2286	1918	3660	2862	2208	2522	2510	1792	1178	1080	1482	1940	890	858	3184	3064	3074	3382	2788	3908	2096	2124	2108	2484	2168	2310	1085.33	2113.56	2592.33	1238	3233.33	2215	77950	0.00231452	[retaining] arabinoxylan-specific endo-β-1,4-xylanase (EC 3.2.1.-);β-1,3-mannanase (EC 3.2.1.-);β-rutinosidase /α-L-rhamnose-(1,6)-β-D-glucosidase (EC 3.2.1.-);Glucomannan-specific endo-β-1,4-glucanase (EC 3.2.1.-);Mannan exo-β-1,4-mannosidase (EC 3.2.1.-);Steryl β-glucosidase (EC 3.2.1.104);Endoglycosylceramidase (EC 3.2.1.123);Chitosanase (EC 3.2.1.132);β-D-galactofuranosidase (EC 3.2.1.146);β-…
GH140	1180	1078	944	1756	1448	1958	2028	2026	2074	1978	2118	2006	3164	2188	1842	2144	2382	1682	1280	1228	1604	1402	962	794	3424	2938	2842	4370	3556	5186	2164	2064	2014	2284	2104	2196	1067.33	1932.44	2233.67	1211.67	3719.33	2137.67	76408	0.00226873	Endo-β-1,2-apiosidase (EC 3.2.1.-);
GH127	1294	1452	1088	2330	1882	2232	2298	2420	2640	2536	2602	2564	4132	3078	2252	3004	3668	1952	1482	1446	1800	1588	916	818	3594	3470	3612	5512	4490	5894	2258	2092	2054	2018	2182	2160	1278	2389.33	3014.33	1341.67	4428.67	2127.33	90810	0.00269636	3-C-carboxy-5-deoxy-L-xylose (aceric acid) hydrolase (EC 3.2.1.-);[retaining] α-1,3-(3,6)-anhydro-D-galactosidase (EC 3.2.1.-);β-L-arabinofuranosidase (EC 3.2.1.185);
GT26	1190	874	826	1674	1396	1588	1702	1976	1868	1636	1940	1784	2342	1794	1410	1606	1710	1240	1386	1340	1488	2790	1124	996	3116	2866	2738	2490	2462	3482	2164	2030	2078	2198	2274	1964	963.333	1729.33	1683.67	1520.67	2859	2118	67542	0.00200548	UDP-Gal: β-1,4-galactosyltransferase (EC 2.4.1.-);UDP-Glc: β-1,4-glucosyltransferase (EC 2.4.1.-);UDP-ManNAc: β-N-acetyl-mannosaminyltransferase (EC 2.4.1.-);UDP-ManNAcA: β-N-acetyl mannosaminuronyltransferase (EC 2.4.1.-);
GH13_23	1582	1140	1322	1710	1658	2222	1998	2106	2228	1960	2186	2020	3270	2230	2064	1884	1864	1596	1980	1656	1852	3244	1512	1364	3108	2974	3004	2160	2568	3314	1972	2008	1842	2484	2284	1960	1348	2009.78	2151.33	1934.67	2854.67	2091.67	76326	0.0022663	GH13's subfamily
GH42	1166	1186	972	2052	2228	2768	2650	2848	3266	2848	2708	3680	4128	2220	2074	2300	2076	2116	1120	1014	1292	1354	740	730	2172	1786	1852	3120	2190	3286	1940	1972	1924	2348	2234	1950	1108	2783.11	2485.67	1041.67	2401	2061.33	76310	0.00226582	α-L-arabinopyranosidase (EC 3.2.1.-);β-galactosidase (EC 3.2.1.23);
GH95	1978	2434	1858	1592	1492	2200	2018	2368	2348	2204	2208	2302	3490	2706	2206	2840	3848	2266	1530	1458	1950	1740	990	790	3214	2996	2972	5360	4430	5526	2338	1882	1996	1990	2070	2046	2090	2081.33	2892.67	1409.67	4083	2053.67	87636	0.00260212	α-L-galactosidase (EC 3.2.1.-);α-L-fucosidase (EC 3.2.1.51);α-1,2-L-fucosidase (EC 3.2.1.63);
GH13_21	150	264	94	280	330	518	400	486	590	302	376	450	1188	808	756	684	610	554	480	450	810	670	286	192	1126	996	990	796	824	1072	2120	1894	1902	2266	2286	1744	169.333	414.667	766.667	481.333	967.333	2035.33	29744	0.000883169	GH13's subfamily
GT87	1772	1224	1292	2114	1790	2174	2138	2634	2170	2744	3042	2660	2084	1764	1232	1434	1220	1376	552	600	614	588	620	486	1410	1442	1490	1686	1214	1900	1962	1802	1896	2240	2300	1708	1429.33	2385.11	1518.33	576.667	1523.67	1984.67	59374	0.00176295	Polyprenol-P-Man: α-1,2-mannosyltransferase (EC 2.4.1.-);
AA12	2344	1580	1970	2120	1868	2140	2260	2612	1932	2206	2446	2194	2610	2030	1644	1878	1858	1564	1310	1116	1308	1438	1146	1086	2768	2390	2662	2618	2448	3142	1758	1688	1690	1848	1996	1738	1964.67	2197.56	1930.67	1234	2671.33	1786.33	71406	0.00212021	Oxidoreductases (EC 1.-.-.-);
GH141	572	892	440	1098	948	1342	1348	1634	1526	1428	1566	1478	2432	1992	1624	1584	2114	1172	1302	1236	1554	1634	888	668	2262	1832	1766	3524	3034	3982	1696	1602	1814	1848	1848	1780	634.667	1374.22	1819.67	1213.67	2733.33	1764.67	59460	0.00176551	α-L-fucosidase (EC 3.2.1.51);Endo-β-1,4-xylanase (EC 3.2.1.8);
GH13_31	398	304	298	370	348	604	450	562	598	432	406	682	766	482	434	480	380	522	586	568	710	1058	476	390	1102	1132	1274	870	1270	1290	1492	1376	1436	1868	2840	1354	333.333	494.667	510.667	631.333	1156.33	1727.67	29608	0.000879131	GH13's subfamily
GT66	2302	1434	1800	2714	2464	3118	3190	3436	3212	2766	3242	2806	3542	2830	2070	3058	3092	2654	1222	1202	1422	1232	770	902	2392	2036	1994	2514	1978	3128	1636	1528	1588	1710	1810	1748	1845.33	2994.22	2874.33	1125	2340.33	1670	80542	0.00239148	Dolichyldiphosphooligosaccharide-protein oligosaccharyltransferase (EC 2.4.1.119);Dolichyl-diphosphooligosaccharide鈥攑rotein glycotransferase (EC 2.4.99.18);Undecaprenyl-diphosphooligosaccharide--protein glycotransferase (EC 2.4.99.19);
GH51_1	1628	1452	1514	2958	2668	3572	3534	3812	3674	3930	4154	4074	2996	1950	1530	2142	1964	2372	1096	954	1126	998	942	694	3644	3402	3470	4788	4188	5340	1720	1534	1592	1684	1700	1696	1531.33	3597.33	2159	968.333	4138.67	1654.33	90492	0.00268692	GH51's subfamily
GH97	1738	1514	1432	1654	1450	2080	1902	2160	2248	1926	2216	2102	2960	2182	1784	2666	4168	1976	1198	1104	1244	2338	1196	880	3086	3048	3090	4196	3986	4554	1714	1596	1658	1600	1558	1604	1561.33	1970.89	2622.67	1326.67	3660	1621.67	77808	0.0023103	α-glucosidase (EC 3.2.1.20);α-galactosidase (EC 3.2.1.22);[inverting] glucoamylase (EC 3.2.1.3);[retaining] β-L-arabinopyranosidase / β-L-arabinosidase (EC 3.2.1.88);
GT8	1044	706	896	1922	1770	1824	1940	2054	1636	1634	1646	1704	1150	908	762	820	1164	784	1546	1270	1640	1750	1346	1130	2408	2256	2462	2150	2126	2646	1708	1610	1596	1434	1486	1616	882	1792.22	931.333	1447	2341.33	1575	56544	0.00167892	Hexosyltransferases (EC 2.4.1.-);UDP-Gal α-galactosyltransferase (EC 2.4.1.-);UDP-Gal:glucoside α-1,3-galactosyltransferase (EC 2.4.1.-);UDP-Glc: LOS α-1,3-glucosyltransferase (EC 2.4.1.-);UDP-GlcA: inositol phosphorylceramide α-glucuronosyltransferase (EC 2.4.1.-);UDP-GlcA: xylan α-glucuronyltransferase (EC 2.4.1.-);UDP-GlcNAc: α-N-acetylglucosaminyltransferase (EC 2.4.1.-);α-1,3-galactosyltrans…
GH17	1236	970	928	482	360	438	518	532	618	448	482	446	2440	1576	1336	2422	3228	1316	896	758	840	2280	988	1110	906	744	814	868	970	1042	1662	1458	1496	1636	1330	1478	1044.67	480.444	2053	1145.33	890.667	1510	41052	0.00121893	[retaining] β-1,3-glucanosyltransglucosidase (EC 2.4.1.-);ABA-specific β-glucosidase (EC 3.2.1.175);Endo-β-1,3-glucanase / laminarinase (EC 3.2.1.39);Exo-β-1,3-glucanase (EC 3.2.1.58);Lichenase / endo-β-1,3-1,4-glucanase (EC 3.2.1.73);
CE20	1456	2962	1272	1814	1488	1978	1956	2532	1790	1652	1742	1770	3340	2302	1854	1874	2296	1586	1498	1432	1958	1554	1540	1262	2296	2188	2116	3576	3694	4116	1558	1428	1458	1442	1608	1510	1896.67	1858	2208.67	1540.67	2997.67	1500.67	71898	0.00213482	Sialate O-acetylesterase (EC 3.1.1.53);Acetylesterase (EC 3.1.1.6);
GH9	1550	1408	1304	1188	1086	1522	1618	1530	1676	1480	1558	1420	1626	1394	1174	1360	2290	1230	1298	918	1014	1886	772	666	3940	4058	4020	4728	4514	4956	1544	1556	1478	1314	1630	1466	1420.67	1453.11	1512.33	1092.33	4369.33	1498	68172	0.00202419	Endo-β-1,4-glucanase (xanthanase) (EC 3.2.1.-);Xyloglucan-specific endo-β-1,4-glucanase / endo-xyloglucanase (EC 3.2.1.151);Exo-β-1,4-glucosaminidase (EC 3.2.1.165);Endo-β-1,4-glucanase (EC 3.2.1.4);Endo-β-1,3(4)-glucanase / lichenase-laminarinase (EC 3.2.1.6);Lichenase / endo-β-1,3-1,4-glucanase (EC 3.2.1.73);Exo-β-1,4-glucanase / cellodextrinase (EC 3.2.1.74);Endo-β-1,4-xylanase (EC 3.2.1.8);Ce…
GH73	1090	1142	860	1014	926	1396	1280	1362	1418	1080	1086	1290	1058	832	624	1082	1778	888	898	952	986	1530	846	722	1748	1736	1808	1858	2048	2156	1522	1290	1320	1406	1702	1418	1030.67	1205.78	1043.67	989	1892.33	1443	46152	0.00137036	Peptidoglycan endo-β-1,4-N-acetylglucosaminidase (EC 3.2.1.-);Mannosyl-glycoprotein endo-β-N-acetylglucosaminidase (EC 3.2.1.96);
GH25	592	690	440	1500	1150	1538	1450	1602	1382	1520	1672	1492	940	970	926	1032	952	1068	612	496	666	528	554	292	1272	1068	1164	1092	1196	1400	1280	1124	1254	1378	2168	1386	574	1478.44	981.333	524.667	1198.67	1431.67	39846	0.00118312	Lysozyme (EC 3.2.1.17);
CBM96	938	806	736	1778	1468	1674	1862	1788	1722	1940	1904	1758	2228	1728	1326	1556	1602	1408	1080	1088	1484	1320	574	794	1892	1876	1726	1986	1514	2382	1492	1342	1392	1498	1494	1362	826.667	1766	1641.33	1056.67	1896	1430	54518	0.00161877	alginate binding
GT94	716	594	490	1506	1158	1390	1420	1464	1508	1458	1686	1480	1794	1128	944	1092	1012	800	828	730	780	1158	662	610	1782	1530	1550	1822	1800	2476	1480	1348	1250	1508	1500	1428	600	1452.22	1128.33	794.667	1826.67	1419	45882	0.00136234	GDP-Man: GlcA-β-1,2-Man-α-1,3-Glc-β-1,4-Glc-α-1-PP-undecaprenol β-1,4-mannosyltransferase (EC 2.4.1.251);
GH26	630	594	498	994	874	1056	934	1136	1098	1292	1310	1144	1406	1238	878	1038	1274	876	618	610	640	972	472	356	1232	1200	1178	1528	1506	1706	1478	1262	1370	1510	1440	1336	574	1093.11	1118.33	611.333	1391.67	1399.33	38684	0.00114862	Mixed-linkage xylan-specific endo-β-1,4-xylanase (cleaves glycosidic bond after β-1,3-linkage) (EC 3.2.1.-);Exo-β-1,4-mannobiohydrolase / mannobiose-producing exo-β-mannanase (EC 3.2.1.100);Endo-β-1,3-xylanase (EC 3.2.1.32);Endo-β-1,4-glucanase (EC 3.2.1.4);Lichenase / endo-β-1,3-1,4-glucanase (EC 3.2.1.73);Endo-β-1,4-mannanase (EC 3.2.1.78);
GH161	1092	924	846	130	122	148	190	194	248	122	208	150	678	862	498	634	622	522	508	560	576	224	164	90	708	508	542	966	572	1248	1336	1440	1202	1554	1428	1354	954	168	636	353.667	757.333	1385.67	23170	0.000687972	β-1,3-glucan phosphorylase (EC 2.4.1.97);
GT76	540	648	474	1404	1272	1414	1336	1562	1464	1386	1384	1556	2048	1576	1194	1330	1134	1154	686	642	956	1004	600	404	1644	1550	1682	1260	1524	1792	1288	1292	1228	1584	1508	1226	554	1419.78	1406	715.333	1575.33	1354.33	44746	0.00132861	No protein characterized
GH172	1002	796	868	1462	1214	1404	1688	1964	1766	1904	1848	1570	2194	2022	1440	1702	1766	1394	756	634	980	614	718	592	1880	1660	1774	3518	2536	3420	1368	1344	1344	1342	1232	1310	888.667	1646.67	1753	715.667	2464.67	1323.33	55026	0.00163385	α-D-arabinofuranosidase (EC 3.2.1.-);α-D-fructofuranosidase (EC 3.2.1.-);Exo-α-1,5-D-arabinofuranosidase (EC 3.2.1.-);Difructose-anhydride-I synthase (EC 4.2.1.179);
GH10	734	812	640	1776	1484	1842	1926	2214	1920	1690	2070	1980	2072	1758	1274	1504	1612	1442	1118	1110	1632	1536	926	938	2550	2272	2498	2954	3532	3488	1412	1222	1274	1298	1290	1374	728.667	1878	1610.33	1210	2882.33	1311.67	61174	0.0018164	Xylan endotransglycosylase (EC 2.4.2.-);[retaining] arabinoxylan-specific endo-β-1,4-xylanase (EC 3.2.1.-);Mixed-linkage xylan-specific endo-β-1,4-xylanase (cleaves glycosidic bond after β-1,3-linkage) (EC 3.2.1.-);Mixed-linkage xylan-specific endo-β-1,4-xylanase (cleaves glycosidic bond preceding β-1,3-linkage) (EC 3.2.1.-);Tomatinase β-galactosidase (EC 3.2.1.-);[inverting] oligosaccharide redu…
CBM11	600	650	568	426	414	574	542	514	640	488	554	538	1242	920	822	834	806	730	1106	1048	1250	1332	752	718	1270	1148	1324	1006	1266	1530	1392	1276	1170	1306	1324	1250	606	521.111	892.333	1034.33	1257.33	1286.33	33330	0.000989646	Modules of approx. 180-200 residues. The CBM11 of Clotridium thermocellum Cel26A-Cel5E has been shown to bind both β-1,4-glucan and β-1,3-1,4-mixed linked glucans.
CBM91	486	436	430	900	818	1072	1008	1028	1230	886	954	904	1622	1416	1116	1250	1368	910	894	904	1118	1596	548	520	2660	2776	2532	2096	2544	2702	1350	1194	1124	1302	1374	1266	450.667	977.778	1280.33	930	2551.67	1268.33	46334	0.00137576	Binding to xylans (birchwood and oat spelt)
GT89	1490	1034	1174	1782	1606	2092	2322	2390	2150	2258	2444	2110	2088	2084	1494	1744	1736	1770	848	668	1046	664	704	412	1690	1416	1366	2610	1430	2614	1226	1132	1128	1246	1196	1206	1232.67	2128.22	1819.33	723.667	1854.33	1189	56370	0.00167376	β-D-arabinofuranosyl-1-monophosphoryldecaprenol : arabinan β-1,2-arabinofuranosyltransferase (EC 2.4.2.-);
GH31_3	572	708	534	828	844	1134	888	1062	1110	1120	1158	1328	1956	1372	1072	1586	1712	1276	770	816	1086	926	464	470	1522	1356	1372	1966	1718	2118	1232	1070	1052	1278	1284	1216	604.667	1052.44	1495.67	755.333	1675.33	1188.67	41976	0.00124637	GH31's subfamily
GH28	786	912	696	1542	1332	1780	1748	2040	2116	1614	1702	1920	1904	1468	1298	1660	2062	1314	776	776	958	840	644	514	2566	2624	2434	4862	3150	4410	1288	1044	1078	1238	1192	1270	798	1754.89	1617.67	751.333	3341	1185	59558	0.00176842	Xylogalacturonan hydrolase (EC 3.2.1.-);Endo-polygalacturonase (EC 3.2.1.15);Rhamnogalacturonase (EC 3.2.1.171);Rhamnogalacturonan α-1,2-galacturonohydrolase (EC 3.2.1.173);Galacturonan α-1,4-galacturonidase (EC 3.2.1.67);Exo-poly-α-digalacturonosidase (EC 3.2.1.82);
GH183	660	564	444	1080	816	1112	946	1304	1050	996	1008	1182	912	644	548	642	876	688	636	538	812	856	436	360	1222	1142	1194	1236	1324	1590	1174	1166	1120	1214	1246	1124	556	1054.89	718.333	606.333	1284.67	1174	33862	0.00100544	Endo-α-1,5-D-arabinofuranosidase (EC 3.2.1.-);
GH31_13	222	246	200	282	292	308	270	312	304	298	272	204	432	448	312	568	684	336	590	670	790	884	522	354	1272	1224	1242	1316	1390	1420	1080	1020	1088	1312	1400	1000	222.667	282.444	463.333	635	1310.67	1150	24564	0.000729363	GH31's subfamily
GH133	694	578	528	1586	1356	1426	1724	1556	1638	1534	1650	1648	1782	1616	1190	1662	2244	1284	984	834	968	1098	706	580	1824	1794	1662	2032	1452	2150	1062	1058	1026	1244	1272	1190	600	1568.67	1629.67	861.667	1819	1142	48632	0.001444	[retaining] amylo-α-1,6-glucosidase (EC 3.2.1.33);
GT27	550	518	502	1328	1136	1412	1384	1674	1654	1504	1530	1454	1338	1142	830	1002	1306	944	836	718	946	1020	690	524	1578	1604	1620	1520	1468	1944	1098	1028	1032	1224	1194	1128	523.333	1452.89	1093.67	789	1622.33	1117.33	42380	0.00125836	[retaining] UDP-GalNAc: polypeptide α-N-acetylgalactosaminyltransferase (EC 2.4.1.41);
GH99	680	624	502	1026	726	994	970	1200	1116	1248	1262	1162	1720	1222	1014	1124	1530	850	676	748	946	1024	542	494	1940	1922	1872	1932	1708	2268	1150	944	1008	1130	1104	1064	602	1078.22	1243.33	738.333	1940.33	1066.67	41442	0.00123051	Glycoprotein endo-α-1,2-mannosidase (EC 3.2.1.130);Mannan endo-1,2-α-mannanase (EC 3.2.1.198);
PL9_2	872	810	718	1138	964	1214	1100	1358	1148	1190	1318	1046	2096	1528	1262	1370	1842	928	812	768	1044	820	694	586	1356	1168	1188	2332	1776	2386	1046	1006	1018	1150	1180	982	800	1164	1504.33	787.333	1701	1063.67	43214	0.00128312	PL9's subfamily
CBM40	772	774	648	1918	1486	1902	1906	2250	1924	1808	1788	1888	2184	1494	1154	1324	1644	1010	1084	1032	1486	1166	1022	1020	1464	1188	1260	1784	1726	1872	1052	990	996	1054	1068	1202	731.333	1874.44	1468.33	1135	1549	1060.33	50340	0.00149471	Modules of approx. 200 residues, found at the N-terminus of GH33 sialidases. Can also be found inserted in the β-propeller of GH33 sialidases. The sialic acid binding function has been demonstrated for the N-terminal CBM40 of Vibrio cholerae sialidase (Moustafa et al. (2004) J Biol Chem 279:40819-26) (PMID: 15226294).
CBM4	262	256	202	346	354	410	448	444	584	422	552	446	1368	950	842	530	814	398	600	702	774	1198	434	512	2108	1842	1896	1570	1366	1900	990	1040	920	1074	1228	1072	240	445.111	817	703.333	1780.33	1054	30854	0.000916127	Modules of approx. 150 residues found in bacterial enzymes. Binding of these modules has been demonstrated with xylan, β-1,3-glucan, β-1,3-1,4-glucan, β-1,6-glucan and amorphous cellulose but not with crystalline cellulose.
GH102	1344	1048	1018	1286	1192	1410	1468	1640	1282	1310	1330	1300	2228	1324	1102	1338	1370	1000	1110	910	906	1154	982	632	1322	1268	1336	1504	1390	2074	1066	886	906	1190	1246	974	1136.67	1357.56	1393.67	949	1482.33	1044.67	44846	0.00133158	Peptidoglycan lytic transglycosylase / peptidoglycan lyase (EC 4.2.2.-);
GH114	522	426	446	480	358	496	556	664	584	512	588	584	748	750	492	890	750	664	196	198	332	362	200	122	644	556	540	884	618	936	1062	868	968	1082	1256	924	464.667	535.778	715.667	235	696.333	1026.67	22258	0.000660892	[retaining] endo-α-1,4-galactosaminidase (EC 3.2.1.109);
GH31_1	690	380	574	344	302	472	472	546	522	446	416	510	966	794	504	1092	1482	658	416	460	594	646	268	270	888	884	806	1112	866	1412	982	888	942	966	1218	1058	548	447.778	916	442.333	994.667	1009	25846	0.000767428	GH31's subfamily
GH76	706	566	668	1336	1198	1288	1262	1714	1254	1468	1630	1518	976	810	748	764	896	756	874	610	752	724	704	584	1272	1234	1358	1456	1362	1732	958	958	1030	1038	1028	1020	646.667	1407.56	825	708	1402.33	1005.33	38252	0.00113579	Endo-α-1,6-mannanase (EC 3.2.1.101);α-glucosidase (EC 3.2.1.20);
GT105	2294	1600	1932	2118	1918	2088	2196	2232	2166	2322	2636	2188	1540	1534	1208	1088	1226	1148	2600	1938	2186	1172	1768	1214	2392	2054	2036	3256	2396	3744	896	1048	922	1004	1054	1100	1942	2207.11	1290.67	1813	2646.33	1004	66214	0.00196605	Dol-P-Man:protein mannosyltransferase (EC 2.4.1.109);
GT2_Glyco_tranf_2_4	816	468	458	878	724	806	926	1082	706	1030	1030	1042	850	594	532	658	676	520	640	538	484	1084	526	590	878	786	902	1000	994	1208	1138	888	888	954	1050	964	580.667	913.778	638.333	643.667	961.333	980.333	29308	0.000870223	GT2's subfamily
GH178	372	410	344	1006	940	1078	946	1168	940	928	1000	1022	1014	780	606	688	544	648	962	824	904	912	654	494	1504	1416	1668	1414	1562	1856	966	880	836	1034	1074	936	375.333	1003.11	713.333	791.667	1570	954.333	34330	0.00101934	Mannan endo-α-1,4-mannosidase (EC 3.2.1.-);
GH150	764	526	614	928	798	896	1084	956	1158	888	1026	890	1202	1104	864	1064	1108	950	698	502	880	706	450	398	1166	1122	1148	1632	1212	1796	920	914	898	1060	960	956	634.667	958.222	1048.67	605.667	1346	951.333	34238	0.00101661	L-carrageenase (EC 3.2.1.162);
GH92	1094	1054	986	1212	1210	1594	1344	1566	1900	1446	1440	1538	2280	1562	1378	2632	4662	2006	836	770	936	1628	744	468	2670	2486	2578	5098	4232	5040	974	1032	964	966	896	828	1044.67	1472.22	2420	897	3684	943.333	64050	0.00190179	α-1,4-mannosidase (EC 3.2.1.-);Mannosyl-1-phosphodiester α-1,P-mannosidase (EC 3.2.1.-);Mannosyl-oligosaccharide α-1,3-mannosidase (EC 3.2.1.-);Mannosyl-oligosaccharide α-1,2-mannosidase (EC 3.2.1.113);α-mannosidase (EC 3.2.1.24);
GH175	508	502	460	734	688	882	790	932	844	780	794	812	976	934	708	762	676	644	568	496	606	332	406	276	496	468	550	518	482	646	940	936	826	942	946	864	490	806.222	783.333	447.333	526.667	909	24724	0.000734113	β-glucosidase (EC 3.2.1.21);
GH146	1214	982	948	1186	1074	1362	1462	1752	1556	1544	1518	1748	1946	1112	1106	1244	1198	938	380	358	538	426	368	238	1436	1450	1454	2560	2114	2518	976	900	946	892	854	878	1048	1466.89	1257.33	384.667	1922	907.667	43176	0.001282	β-L-arabinofuranosidase (EC 3.2.1.185);
GT53	70	148	64	610	484	538	544	658	446	566	588	624	280	292	260	288	240	362	58	42	80	66	38	16	98	82	102	94	166	146	824	752	800	974	1140	760	94	562	287	50	114.667	875	13300	0.000394908	Decaprenyl-P-β-D-Araf: Lipoarabinomannan α-1,5-D-arabinofuranosyltransferase (EC 2.4.2.-);Decaprenyl-P-β-D-Araf: α-D-arabinofuranosyltransferase (EC 2.4.2.-);
CBM41	178	270	148	408	352	440	514	470	628	386	450	388	702	660	454	404	422	286	512	546	716	684	480	386	908	856	826	704	780	976	914	748	820	856	1042	808	198.667	448.444	488	554	841.667	864.667	21122	0.000627162	Modules of approx. 100 residues found in primarily in bacterial pullulanases. The N-terminal module from Thermotoga maritima Pul13 has been shown to bind to the α-glucans amylose, amylopectin, pullulan, and oligosaccharide fragments derived from these polysaccharides (Lammerts van Bueren et al. (2004) Biochemistry 43:15633-42) (PMID: 15581376).
GH165	428	518	464	1172	822	1112	1038	1396	1054	1218	1096	900	1192	1078	828	980	914	796	684	582	782	476	738	498	936	746	758	1818	1218	1830	844	834	810	882	826	922	470	1089.78	964.667	626.667	1217.67	853	33190	0.000985489	β-galactosidase (EC 3.2.1.23);
GH93	966	544	622	1244	1338	1728	1420	1598	1588	1590	1606	2068	1838	1092	962	924	886	998	630	438	616	502	546	366	972	876	976	1520	1132	1630	864	856	816	862	776	800	710.667	1575.56	1116.67	516.333	1184.33	829	38190	0.00113395	Exo-α-1,5-L-arabinofuranosidase (EC 3.2.1.-);
GH158	1484	1162	1138	412	368	334	416	462	422	434	420	404	1254	898	760	828	1132	514	780	640	752	1180	726	648	940	762	724	974	1098	1268	870	880	930	732	696	830	1261.33	408	897.667	787.667	961	823	28272	0.000839462	Endo-β-1,3-glucanase / laminarinase (EC 3.2.1.39);
CE12	410	512	294	1460	1104	1414	1464	1880	1540	1366	1544	1858	1584	1066	872	1518	1526	1370	552	532	784	660	556	484	1610	1602	1700	2282	1726	2384	844	806	730	772	918	848	405.333	1514.44	1322.67	594.667	1884	819.667	42572	0.00126406	Carboxylic ester hydrolase (EC 3.1.1.-);Pectin acetylesterase (EC 3.1.1.-);Acetylxylan esterase (EC 3.1.1.72);Rhamnogalacturonan acetylesterase (EC 3.1.1.86);
GH136	622	682	546	1016	900	976	1076	1194	1154	1008	1224	972	1850	1368	1292	1428	1848	1202	1176	1232	1586	1630	952	810	1944	1764	1894	2536	2064	2844	844	812	714	876	794	850	616.667	1057.78	1498	1231	2174.33	815	45680	0.00135635	Lacto-N-biosidase (Lewis antigen a/b specificity) (EC 3.2.1.-);Lacto-N-biosidase (EC 3.2.1.140);
PL11	522	524	522	1220	1106	1558	1546	1646	1448	1520	1430	1290	1168	1128	902	980	914	1078	638	688	752	700	598	528	1576	1346	1524	1752	1598	2140	808	806	804	692	814	906	522.667	1418.22	1028.33	650.667	1656	805	39172	0.00116311	Rhamnogalacturonan endolyase (EC 4.2.2.23);Rhamnogalacturonan exolyase (EC 4.2.2.24);
CE15	610	608	594	1696	1314	1576	1578	2240	1622	1766	2052	1730	1678	1202	964	934	1114	878	714	676	954	974	816	670	1676	1536	1466	2190	2062	2406	812	794	698	724	836	916	604	1730.44	1128.33	800.667	1889.33	796.667	45076	0.00133841	4-O-methyl-glucuronoyl esterase (EC 3.1.1.117);
GH88	666	604	564	660	702	968	878	932	1174	908	1016	952	1238	912	772	848	858	736	618	536	668	796	376	306	1490	1512	1654	1212	1136	1452	740	734	728	846	834	882	611.333	910	894	550	1409.33	794	31908	0.000947423	D-4,5-unsaturated β-glucuronyl hydrolase (EC 3.2.1.-);Gellan tetrasaccharide unsaturated glucuronosyl hydrolase (EC 3.2.1.179);Unsaturated chondroitin disaccharide hydrolase (EC 3.2.1.180);
GH30_1	1034	630	760	148	108	142	194	222	204	174	208	236	664	530	370	872	1412	502	428	432	508	862	376	528	464	404	426	854	724	808	800	754	718	712	814	736	808	181.778	725	522.333	613.333	755.667	19758	0.000586661	GH30's subfamily
GH13_5	24	130	26	46	40	60	56	40	84	66	32	60	108	74	56	100	98	92	328	290	256	650	230	260	524	508	546	372	402	662	724	690	710	768	924	548	60	53.7778	88	335.667	502.333	727.333	10584	0.000314264	GH13's subfamily
GH50	498	490	448	550	476	600	630	748	734	766	788	624	742	742	582	462	660	486	694	706	864	600	504	466	1086	1088	1176	1572	1518	2010	708	588	678	714	744	808	478.667	657.333	612.333	639	1408.33	706.667	27550	0.000818024	β-galactosidase (EC 3.2.1.23);β-agarase (EC 3.2.1.81);
GH105	640	782	512	974	938	1538	1274	1318	1588	1096	1358	1546	1212	964	768	1030	1696	920	594	592	734	774	566	370	2632	2580	2568	3456	2992	3592	606	716	698	742	690	724	644.667	1292.22	1098.33	605	2970	696	45780	0.00135932	D-4,5-unsaturated α-galacturonidase (EC 3.2.1.-);D-4,5-unsaturated β-glucuronyl hydrolase (EC 3.2.1.-);Unsaturated rhamnogalacturonyl hydrolase (EC 3.2.1.172);
GH128	166	234	234	518	412	402	500	530	560	484	524	530	698	592	458	538	724	326	318	322	344	378	208	194	706	656	622	548	562	712	728	628	682	730	722	636	211.333	495.556	556	294	634.333	687.667	18126	0.000538203	Endo-β-1,3-glucanase / laminarinase (EC 3.2.1.39);Exo-β-1,3-glucanase (EC 3.2.1.58);
GH116	684	646	602	544	496	756	732	784	684	840	916	764	1158	804	716	770	828	564	620	510	658	692	370	306	990	908	1014	1816	1272	1760	644	676	698	726	702	636	644	724	806.667	526	1293.33	680.333	28286	0.000839878	β-D-arabinofuranosidase (EC 3.2.1.-);β-glucosidase (EC 3.2.1.21);Xylan β-1,4-xylosidase (EC 3.2.1.37);β-glucosylceramidase (EC 3.2.1.45);β-N-acetylhexosaminidase (EC 3.2.1.52);
GH184	34	48	22	94	114	162	122	122	114	100	92	178	234	116	124	198	106	288	148	178	228	268	100	66	390	426	432	296	388	410	678	584	588	790	788	610	34.6667	122	177.667	164.667	390.333	673	9636	0.000286115	Lysozyme (EC 3.2.1.17);
GH121	1126	986	846	1968	1580	2180	2074	2406	2242	2590	2608	2342	1450	1110	914	780	716	988	826	796	908	828	812	764	1066	1056	1056	1322	998	1504	722	646	642	604	652	718	986	2221.11	993	822.333	1167	664	44826	0.00133099	(Arα-f)3-Hyp β-L-arabinobiosidase (EC 3.2.1.187);
GH5_29	44	48	20	98	106	178	144	144	130	126	104	76	64	62	64	200	178	106	54	34	58	68	72	20	50	66	94	80	78	108	690	544	576	750	838	514	37.3333	122.889	112.333	51	79.3333	652	6586	0.000195554	GH5's subfamily
GH16	326	328	262	230	200	254	296	316	282	244	266	384	416	296	216	472	504	300	212	184	184	206	132	112	462	378	490	712	460	854	642	572	534	712	738	660	305.333	274.667	367.333	171.667	559.333	643	13836	0.000410823	[retaining] β-1,3-glucanosyltransglucosidase (EC 2.4.1.-);β-transglycosidase (EC 2.4.1.-);Chitin β-1,3/1,6-glucanosyltransferase (EC 2.4.1.-);Xyloglucan:xyloglucosyl transferase (EC 2.4.1.207);GlcNAc-α-1,4-Gal-releasing endo-β-galactosidase (EC 3.2.1.-);[retaining] β-1,3-glucanase (EC 3.2.1.-);α-carrageenase (EC 3.2.1.-);β-carrageenase (EC 3.2.1.-);Endo-β-1,4-galactosidase (EC 3.2.1.-);Keratan-su…
CE5	98	64	62	526	478	392	382	520	366	504	464	496	148	116	152	182	112	224	60	52	72	80	96	98	94	58	94	132	114	134	604	630	606	688	822	496	74.6667	458.667	155.667	76.3333	104.333	641	10216	0.000303337	Triacylglycerol lipase (EC 3.1.1.3);Acetylxylan esterase (EC 3.1.1.72);Cutinase (EC 3.1.1.74);
CE2	126	184	178	302	330	446	374	436	424	368	362	376	656	616	470	450	428	328	430	466	460	942	318	264	1752	1678	1580	1494	1236	1822	594	578	626	664	636	682	162.667	379.778	491.333	480	1593.67	630	23076	0.00068518	6-O-glycoside deacetylase (EC 3.1.1.-);Acetylmannan esterase (EC 3.1.1.-);Acetylesterase (EC 3.1.1.6);Acetylxylan esterase (EC 3.1.1.72);
GH30_3	586	402	506	118	102	144	116	130	84	104	80	144	474	340	198	308	372	120	40	18	56	160	42	18	96	102	164	184	136	184	572	668	520	732	706	528	498	113.556	302	55.6667	144.333	621	9254	0.000274773	GH30's subfamily
CE13	610	460	510	852	664	766	826	876	654	772	732	764	1244	1156	1060	1108	1190	906	598	492	728	1120	762	720	1082	1128	1102	866	1342	1238	598	606	632	628	628	624	526.667	767.333	1110.67	736.667	1126.33	619.333	30044	0.000892077	Pectin acetylesterase (EC 3.1.1.-);
GH13_38	982	882	698	226	222	232	298	324	354	228	280	282	558	438	406	498	668	326	774	528	622	1088	520	486	730	794	756	702	856	910	620	568	584	586	674	568	854	271.778	482.333	669.667	791.333	600	20268	0.000601804	GH13's subfamily
GH13_46	1320	862	1092	254	228	386	354	346	428	352	270	388	1152	628	554	1106	1738	718	694	550	664	1262	688	682	914	964	864	1222	1380	1402	690	594	676	524	520	566	1091.33	334	982.667	756.667	1124.33	595	27032	0.000802643	GH13's subfamily
GH31	550	594	452	644	632	694	786	894	772	850	866	726	1014	786	664	1312	1950	908	822	568	964	1090	872	874	976	798	790	1738	1250	1696	628	554	606	584	626	548	532	762.667	1105.67	865	1208	591	31078	0.000922779	Oligosaccharide α-4-glucosyltransferase (EC 2.4.1.161);α-6-glucosyltransferase (EC 2.4.1.24);α-3-isomaltosyltransferase / cycloalternan-forming enzyme (EC 2.4.1.387);Exo-α-1,4-galactosidase (EC 3.2.1.-);[retaining] oligo-α-1,6-glucosidase (EC 3.2.1.10);Dextranase (EC 3.2.1.11);α-xylosidase (EC 3.2.1.177);Sulfoquinovosidase (EC 3.2.1.199);α-glucosidase (EC 3.2.1.20);[retaining] cycloalternan-speci…
CE8	478	430	442	1432	1260	1786	1538	1810	1744	1556	1650	1834	1330	1066	846	1170	1198	1022	608	450	676	640	402	412	1954	1852	1824	2632	2100	2654	592	636	516	614	640	544	450	1623.33	1105.33	531.333	2169.33	590.333	42338	0.00125711	Pectin methylesterase (EC 3.1.1.11);
CBM6	498	542	324	368	304	550	496	684	544	514	484	588	716	604	522	598	910	470	344	264	372	568	362	276	656	630	674	812	904	1112	582	522	592	632	626	570	454.667	503.556	636.667	364.333	798	587.333	20214	0.000600201	Modules of approx. 120 residues. The cellulose-binding function has been demonstrated in one case on amorphous cellulose and β-1,4-xylan. Some of these modules also bind β-1,3-glucan, β-1,3-1,4-glucan, and β-1,4-glucan.
GH138	384	296	372	322	344	422	372	402	544	376	376	450	898	702	650	584	744	464	542	500	724	620	350	272	1038	1006	930	1374	1418	1688	684	550	562	498	600	576	350.667	400.889	673.667	501.333	1242.33	578.333	22634	0.000672056	Rhamnogalacturonan α-1,2-galacturonohydrolase (EC 3.2.1.173);
PL31	880	514	656	988	744	820	946	964	914	852	942	860	1462	938	812	1888	2026	1372	356	258	384	606	376	306	424	440	350	862	570	806	566	554	556	628	574	574	683.333	892.222	1416.33	381	575.333	575.333	27768	0.000824497	Endo-β-1,4-glucuronan lyase (EC 4.2.2.14);Poly(β-mannuronate) lyase / M-specific alginate lyase (EC 4.2.2.3);
CBM16	566	528	338	604	552	592	692	642	648	586	646	554	1192	990	834	922	970	586	472	448	544	564	438	464	1002	782	822	1562	1080	1826	578	524	538	578	638	586	477.333	612.889	915.667	488.333	1179	573.667	25888	0.000768675	Carbohydrate-binding module 16. Binding to cellulose and glucomannan demonstrated [B. Bae et al (2008) J Biol Chem. 283:12415-25 (PMID: 18025086)]
GH163	602	398	470	636	468	606	554	760	614	626	820	654	838	660	474	652	798	430	460	356	604	338	298	292	800	590	554	1704	1290	1642	622	554	544	520	568	622	490	637.556	642	391.333	1096.67	571.667	23418	0.000695335	Endo-β-N-acetylglucosaminidase cleaving GlcNAc-β-1,2-Man (EC 3.2.1.-);
GT107	838	542	542	180	220	248	248	260	356	270	268	288	702	638	498	684	692	632	394	342	322	668	396	276	364	364	386	490	374	564	678	486	536	542	600	576	640.667	259.778	641	399.667	423.667	569.667	16464	0.000488855	CMP-KDO: β-2,4-KDO transferase (EC 2.4.3.-);CMP-KDO: β-2,7-KDO transferase (EC 2.4.3.-);
CBM20	536	370	380	304	276	502	478	472	546	360	386	474	784	662	602	688	816	536	400	412	474	472	302	178	674	536	582	792	686	926	562	542	580	562	558	598	428.667	422	681.333	373	699.333	567	19008	0.000564392	The granular starch-binding function has been demonstrated in several cases. Interact strongly with cyclodextrins. Often designated as starch-binding domains (SBD).
GH144	532	504	486	586	462	674	678	708	582	692	638	572	1396	1038	864	1048	1706	810	352	324	356	434	316	348	618	708	614	1106	918	908	546	506	582	584	622	542	507.333	621.333	1143.67	355	812	563.667	24360	0.000723305	Exo β-1,2-glucooligosaccharide sophorohydrolase (non-reducing end) (EC 3.2.1.214);Endo-β-1,2-glucanase (EC 3.2.1.71);
GH81	750	622	444	84	130	128	130	96	132	116	152	162	770	406	442	558	714	458	128	34	110	126	80	78	174	150	134	146	208	168	580	554	570	670	486	514	605.333	125.556	558	92.6667	163.333	562.333	11204	0.000332673	Endo-β-1,3-glucanase / laminarinase (EC 3.2.1.39);
GH43	326	344	344	612	496	712	830	844	672	826	902	814	1142	868	550	696	624	638	474	442	546	538	430	278	852	826	844	992	1038	1160	518	504	524	522	572	626	338	745.333	753	451.333	952	544.333	23926	0.000710419	α-1,2-L-arabinofuranosidase (EC 3.2.1.-);α-1,3-L-arabinofuranosidase (EC 3.2.1.-);α-1,4-L-arabinofuranosidase (EC 3.2.1.-);Exo-1,4-β-xylosidase (EC 3.2.1.-);Exo-α-1,5-L-arabinofuranosidase (EC 3.2.1.-);Exo-β-1,3-galactanase (EC 3.2.1.145);β-D-galactofuranosidase (EC 3.2.1.146);Xylan β-1,4-xylosidase (EC 3.2.1.37);α-L-arabinofuranosidase (EC 3.2.1.55);β-1,3-xylosidase (EC 3.2.1.72);Endo-β-1,4-xyla…
GH100	1116	698	778	722	644	838	870	806	1004	808	1002	830	1060	804	790	612	580	578	560	522	600	926	610	404	928	928	930	770	822	1036	554	554	478	620	508	550	864	836	737.333	603.667	902.333	544	26840	0.000796942	β-fructofuranosidase / invertase (EC 3.2.1.26);
GT14	508	318	318	248	232	230	232	274	234	290	240	244	756	410	360	480	572	500	382	254	222	894	168	220	296	200	324	294	290	268	600	514	468	576	614	484	381.333	247.111	513	356.667	278.667	542.667	13514	0.000401262	UDP-GlcA: β-1,3-galactan β-1,6-glucuronosyltransferase (EC 2.4.1.-);UDP-GlcA: β-1,6-galactan β-1,6-glucuronosyltransferase (EC 2.4.1.-);β-1,3-galactosyl-O-glycosyl-glycoprotein β-1,6-N-acetylglucosaminyltransferase (EC 2.4.1.102);UDP-GlcNAc: N-acetyllactoside β-1,6-N-acetylglucosaminyltransferase (EC 2.4.1.150);Peptide O-β-xylosyltransferase (EC 2.4.2.26);
GH176	588	614	440	834	602	820	880	994	760	780	828	758	1122	772	730	1080	626	860	294	224	232	432	372	262	462	408	472	702	568	644	558	362	530	510	576	450	547.333	806.222	865	302.667	542.667	497.667	22146	0.000657567	Isoamylase (EC 3.2.1.68);
GH113	960	572	688	682	604	680	788	890	820	866	978	828	792	574	516	958	910	774	388	322	490	464	360	380	568	382	422	940	662	1222	502	484	472	490	526	506	740	792.889	754	400.667	699.333	496.667	23460	0.000696582	[retaining] reducing end exo-β-mannosidase (EC 3.2.1.-);β-mannosidase (EC 3.2.1.25);Endo-β-1,4-mannanase (EC 3.2.1.78);
GH117	400	378	342	364	394	518	430	512	546	496	540	518	684	580	532	580	766	352	568	544	708	630	428	394	1134	1088	1004	1590	1292	1820	488	470	560	460	476	510	373.333	479.778	582.333	545.333	1321.33	494	23096	0.000685774	α-neoagarobiosidase (EC 3.2.1.-);β-D-galactofuranosidase (EC 3.2.1.146);α-neoagaro-oligosaccharide hydrolase (EC 3.2.1.159);
GH31_15	234	224	208	390	424	512	536	564	636	560	634	754	978	906	652	780	612	450	300	328	416	170	136	108	576	580	510	626	462	700	440	450	442	476	632	496	222	556.667	729.667	243	575.667	489.333	17902	0.000531552	GH31's subfamily
CBM23	230	262	214	104	94	116	144	124	202	82	176	84	444	400	244	260	450	182	468	468	508	570	308	220	806	720	676	770	636	1030	530	516	506	464	464	448	235.333	125.111	330	423.667	773	488	13920	0.000413317	Mannan-binding function demonstrated in one case.
GH67	598	454	502	582	528	716	618	728	628	738	700	624	426	268	228	358	352	378	196	162	154	154	238	212	884	1030	1012	1342	1222	1460	518	458	414	530	452	460	518	651.333	335	186	1158.33	472	20324	0.000603467	Xylan α-1,2-(4-O-methyl)-glucuronidase (EC 3.2.1.131);α-glucuronidase (EC 3.2.1.139);
GT70	440	218	314	202	182	158	180	244	208	268	284	216	566	412	372	444	336	356	308	286	286	532	254	210	542	470	454	394	502	586	472	486	424	388	510	496	324	215.778	414.333	312.667	491.333	462.667	13000	0.000386	UDP-GlcA: β-glucuronosyltransferase (EC 2.4.1.17);
CE16	794	570	556	484	442	458	466	576	492	456	532	396	684	402	330	322	264	210	622	412	514	924	522	514	1108	1148	1182	1048	914	1372	570	464	452	408	360	476	640	478	368.667	584.667	1128.67	455	21444	0.000636723	Acetylesterase (EC 3.1.1.6);
GH55	182	314	158	322	326	454	450	568	478	420	530	430	420	412	260	260	316	246	394	352	510	630	290	290	636	644	622	752	822	820	552	422	424	454	430	436	218	442	319	411	716	453	16026	0.000475849	Hesperidin 6-O-α-L-rhamnosyl-β-glucosidase (EC 3.2.1.168);Endo-β-1,3-glucanase / laminarinase (EC 3.2.1.39);Exo-β-1,3-glucanase (EC 3.2.1.58);
GH55_1	176	224	130	280	258	380	508	456	498	356	366	450	228	164	124	148	104	172	328	252	464	518	326	262	706	726	798	666	604	746	534	424	444	414	486	376	176.667	394.667	156.667	358.333	707.667	446.333	14096	0.000418543	GH55's subfamily
PL12	364	262	306	460	358	504	534	670	576	530	516	498	596	470	328	610	574	404	290	172	370	172	242	160	250	222	256	622	358	720	354	338	338	422	698	430	310.667	516.222	497	234.333	404.667	430	14974	0.000444613	Heparin lyase / heparin lyase I (EC 4.2.2.7);Heparin-sulfate lyase / heparin lyase III (EC 4.2.2.8);
PL22_1	524	454	514	772	676	792	836	956	822	1002	976	884	760	688	572	536	572	634	376	340	460	334	558	346	680	578	594	726	708	982	442	470	388	424	380	468	497.333	857.333	627	402.333	711.333	428.667	22224	0.000659883	PL22's subfamily
GH13_41	146	86	102	32	42	62	72	86	56	88	62	82	278	214	140	132	210	72	138	148	204	244	154	118	242	148	164	214	296	270	388	362	378	430	538	440	111.333	64.6667	174.333	167.667	222.333	422.667	6838	0.000203036	GH13's subfamily
GH148	376	252	232	296	228	346	282	432	406	352	418	366	394	478	438	260	382	246	308	346	444	390	218	170	502	494	508	686	690	872	450	398	402	424	384	460	286.667	347.333	366.333	312.667	625.333	419.667	14330	0.000425491	[retaining] β-1,3-glucanase (EC 3.2.1.-);Endo-β-1,4-glucanase (EC 3.2.1.4);Lichenase / endo-β-1,3-1,4-glucanase (EC 3.2.1.73);
GH13_14	254	126	150	154	94	146	104	96	234	122	168	224	448	284	274	698	1050	460	102	118	122	310	174	138	386	412	376	568	502	518	320	304	286	398	858	332	176.667	149.111	535.667	160.667	460.333	416.333	11310	0.00033582	GH13's subfamily
PL6	218	180	210	326	324	382	342	412	402	370	388	428	528	396	324	410	492	316	228	202	256	302	230	170	554	544	538	424	468	692	442	382	322	452	488	406	202.667	374.889	411	231.333	536.667	415.333	13548	0.000402272	Alginate lyase (EC 4.2.2.-);Oligo-α-L-guluronate lyase / exo-acting α-L-guluronan lyase (EC 4.2.2.-);Poly-(MG)-lyase / MG-specific alginate lyase (EC 4.2.2.-);Poly(α-L-guluronate) lyase / G-specific alginate lyase (EC 4.2.2.11);Chondroitinase B (EC 4.2.2.19);Oligoalginate lyase / exo-alginate lyase (EC 4.2.2.26);Poly(β-mannuronate) lyase / M-specific alginate lyase (EC 4.2.2.3);
GT25	892	606	630	384	396	442	470	494	432	424	384	414	716	438	326	678	786	384	246	256	266	578	316	288	506	524	496	526	562	732	264	190	268	372	952	430	709.333	426.667	554.667	325	557.667	412.667	17068	0.000506789	LPS β-1,4-N-acetylgalactosaminyltransferase (EC 2.4.1.-);UDP-Gal: β-1,4-galactosyltransferase (EC 2.4.1.-);UDP-Glc: hydroxylysine O-glucosyltransferase (EC 2.4.1.-);β-1,2-galactosyltransferase (EC 2.4.1.-);Occidiofungin β-xylosyltransferase (EC 2.4.2.-);
GH153	68	66	76	78	48	118	64	96	62	44	100	92	62	40	36	50	36	30	54	54	82	38	56	14	28	14	18	106	40	88	114	90	224	312	1320	406	70	78	42.3333	49.6667	49	411	4224	0.00012542	β-1,6-N-acetylglucosaminidase (EC 3.2.1.-);
GH151	370	442	396	288	138	276	304	286	376	276	320	330	766	726	462	500	580	298	374	408	544	548	366	336	582	500	528	786	582	846	370	416	424	396	408	384	402.667	288.222	555.333	429.333	637.333	399.667	15932	0.000473058	α-L-fucosidase (EC 3.2.1.51);
GH123	622	346	584	180	108	234	198	200	228	190	280	174	346	318	298	364	404	196	328	234	370	340	142	62	422	282	348	1186	662	1124	492	368	402	388	358	372	517.333	199.111	321	246	670.667	396.667	13150	0.000390454	Glycosphingolipid β-N-acetylgalactosaminidase (EC 3.2.1.-);β-N-acetylgalactosaminidase (EC 3.2.1.53);
GT2_Glyco_tranf_2_2	300	290	238	734	580	666	814	740	618	856	870	678	888	506	472	464	604	388	456	416	472	530	328	276	688	704	724	640	536	852	352	372	418	434	394	410	276	728.444	553.667	413	690.667	396.667	19708	0.000585177	GT2's subfamily
GH13_19	632	340	592	104	136	106	132	144	172	72	88	124	354	316	280	548	854	426	368	290	272	762	278	256	642	706	624	680	692	776	392	364	392	362	410	424	521.333	119.778	463	371	686.667	390.667	14110	0.000418959	GH13's subfamily
AA1_3	276	240	180	636	580	706	778	916	698	826	904	766	602	492	458	494	350	472	250	200	344	254	316	304	210	266	248	242	290	274	408	364	330	468	442	322	232	756.667	478	278	255	389	15906	0.000472286	AA1's subfamily
GH84	128	64	88	230	218	284	252	254	238	292	272	262	258	238	176	212	234	166	124	160	174	204	148	96	466	478	502	534	578	666	382	400	364	356	356	414	93.3333	255.778	214	151	537.333	378.667	10268	0.000304881	[protein]-3-O-(GlcNAc)-L-Ser/Thr β-N-acetylglucosaminidase (EC 3.2.1.169);Hyaluronidase / hyaluronoglucosaminidase (EC 3.2.1.35);β-N-acetylhexosaminidase (EC 3.2.1.52);
GH27	426	448	398	568	552	816	874	892	1010	924	1012	1050	762	466	446	412	468	424	182	166	284	212	192	182	860	778	812	2042	1288	1762	350	358	334	364	424	424	424	855.333	496.333	203	1257	375.667	22962	0.000681796	Galactan:galactan α-galactosyltransferase (EC 2.4.1.-);Galactomannan exo-α-1,6-galactosidase (EC 3.2.1.-);α-galactosidase (EC 3.2.1.22);α-N-acetylgalactosaminidase (EC 3.2.1.49);[retaining] β-L-arabinopyranosidase / β-L-arabinosidase (EC 3.2.1.88);[retaining] isomalto-dextranase (EC 3.2.1.94);
CBM69	120	46	70	120	108	132	128	164	132	76	102	108	270	284	270	176	116	140	398	226	444	380	280	266	220	228	200	286	446	338	410	376	400	328	338	380	78.6667	118.889	209.333	332.333	286.333	372	8506	0.000252563	starch-binding function demonstrated in one case; distantly related to families CBM20 and CBM48
PL42	208	358	240	462	366	470	518	638	428	540	526	618	550	398	272	490	470	314	518	358	564	356	286	190	660	504	532	874	718	972	360	390	352	406	328	382	268.667	507.333	415.667	378.667	710	369.667	16616	0.000493368	L-rhamnose-α-1,4-D-glucuronate lyase (EC 4.2.2.28);
PL22_2	622	426	524	538	466	640	622	714	532	692	762	596	638	484	436	410	384	442	228	200	248	116	284	164	688	628	608	1072	682	968	352	344	326	402	370	408	524	618	465.667	206.667	774.333	367	18016	0.000534937	PL22's subfamily
GH13_39	244	192	134	144	144	188	224	186	312	274	212	260	888	768	604	738	608	584	142	128	88	140	48	58	182	196	218	162	114	156	300	306	286	456	366	408	190	216	698.333	100.667	171.333	353.667	10458	0.000310522	GH13's subfamily
GH43_12	212	172	262	190	268	394	348	326	390	272	364	326	474	280	248	338	524	282	264	186	252	338	166	108	978	938	1048	888	924	1062	348	424	358	332	288	354	215.333	319.778	357.667	219	973	350.667	14926	0.000443188	GH43's subfamily
CBM51	176	180	128	708	428	508	492	674	516	496	528	490	812	550	370	344	414	230	130	158	206	188	204	150	308	244	214	446	486	550	358	304	320	358	424	338	161.333	537.778	453.333	172.667	374.667	350.333	13430	0.000398768	Modules of approx. 150 residues found attached to various enzymes from families GH2, GH27, GH31, GH95, GH98 and GH101 . Binding to galactose and to blood group A/B-antigens demonstrated in the case of C. perfringens GH95CBM51 and GH98CBM51 respectively [Gregg KJ et al. (2008) J. Biol. Chem. 283:12604-13 PMID: 18292090].
CBM57	328	294	272	940	856	1038	920	1142	850	816	916	1018	938	688	508	666	680	670	542	476	504	1194	682	590	788	602	632	766	836	974	376	258	310	350	382	364	298	944	691.667	664.667	766.333	340	24166	0.000717545	Created from reading Schallus et al (2008) Mol Biol Cell. 19:3404-3414 [PMID: 18524852] and finding related domains attached to various glycosidases.
GH130_8	490	554	460	514	394	566	482	620	566	494	544	530	502	390	336	348	250	226	390	310	400	250	208	264	620	488	586	640	508	778	356	298	292	398	338	352	501.333	523.333	342	303.667	603.333	339	15742	0.000467417	GH130's subfamily
PL1_2	324	248	280	1058	864	1024	888	1158	1060	892	800	1006	672	474	412	482	538	460	524	528	512	760	494	368	986	948	956	1880	1730	1864	374	318	294	340	346	340	284	972.222	506.333	531	1394	335.333	26202	0.000777999	PL1's subfamily
GH16_21	258	186	274	160	144	142	132	142	186	116	154	172	556	320	230	308	296	184	106	92	90	120	96	80	206	200	218	306	350	322	382	330	288	338	350	296	239.333	149.778	315.667	97.3333	267	330.667	8130	0.000241399	GH16's subfamily
GH51_3	100	262	96	242	202	296	318	318	366	178	368	234	396	320	206	222	392	188	94	106	128	132	74	40	408	362	340	234	366	384	352	308	268	394	342	320	152.667	280.222	287.333	95.6667	349	330.667	9356	0.000277802	GH51's subfamily
GT21	514	338	406	792	664	742	816	988	784	930	848	874	594	520	476	384	248	486	280	294	372	172	238	178	370	298	312	706	472	688	322	324	306	358	354	306	419.333	826.444	451.333	255.667	474.333	328.333	17754	0.000527158	Hexosyltransferases (EC 2.4.1.-);UDP-Glc: ceramide β-glucosyltransferase (EC 2.4.1.80);
GH87	88	222	96	230	200	282	200	312	268	244	238	248	288	154	216	174	316	218	160	134	210	244	140	136	504	638	520	380	266	422	306	288	318	342	404	294	135.333	246.889	227.667	170.667	455	325.333	9700	0.000288016	Endo-α-1,3-glucanase / mutanase (EC 3.2.1.59);Mycodextranase / α-1,3-1,4-glucanase (EC 3.2.1.61);
GH13_2	134	124	114	132	148	192	218	180	282	158	236	190	286	366	224	252	264	234	450	426	552	774	450	432	448	460	406	518	616	594	328	278	336	304	340	340	124	192.889	271	514	507	321	11786	0.000349954	GH13's subfamily
GH13_8	322	298	276	214	212	358	388	378	588	260	282	334	346	336	196	310	608	244	464	428	406	210	282	152	1156	1134	1052	1626	1256	1838	360	316	318	296	338	284	298.667	334.889	340	323.667	1343.67	318.667	17866	0.000530483	GH13's subfamily
GH5_13	228	166	180	440	324	366	448	516	310	428	452	378	480	400	328	354	412	274	336	230	404	680	334	244	396	370	422	326	470	504	402	268	312	304	290	310	191.333	406.889	374.667	371.333	414.667	314.333	13086	0.000388554	GH5's subfamily
GH62	68	138	88	184	170	260	262	300	264	282	284	304	418	324	264	240	222	214	178	160	258	190	126	78	194	204	210	300	272	340	352	290	292	304	280	360	98	256.667	280.333	165	253.333	313	8674	0.000257551	α-1,3-L-arabinofuranosidase (EC 3.2.1.-);α-L-arabinofuranosidase (EC 3.2.1.55);Endo-β-1,4-xylanase (EC 3.2.1.8);
GT84	630	558	528	656	544	644	712	782	702	860	858	646	1060	848	642	686	586	672	198	226	242	250	256	336	580	596	488	496	318	534	316	284	292	394	320	270	572	711.556	749	251.333	502	312.667	19010	0.000564451	Cyclic β-1,2-glucan synthase (elongation) (EC 2.4.1.-);
GH35	152	136	150	518	476	630	504	600	624	546	576	676	602	374	262	684	708	502	100	108	164	54	102	210	480	380	456	992	502	1016	318	306	282	278	350	316	146	572.222	522	123	637.667	308.333	15134	0.000449364	β-1,2-glucooligosaccharide:β-glucosyltransferase (EC 2.4.1.391);β-1,3-galactosidase (EC 3.2.1.-);Exo-β-1,4-galactanase (EC 3.2.1.-);Exo-β-1,4-glucosaminidase (EC 3.2.1.165);β-galactosidase (EC 3.2.1.23);
GT3	250	216	174	332	282	366	322	360	346	310	288	274	384	352	312	750	1232	474	232	212	262	408	214	218	574	504	548	912	994	906	324	256	334	298	326	292	213.333	320	584	257.667	739.667	305	14838	0.000440575	UDP-Glc glycogen synthase / starch synthase (EC 2.4.1.11);
PL12_3	172	138	226	450	386	496	426	546	404	450	502	434	312	298	308	274	268	272	174	136	164	254	214	184	360	338	352	292	306	442	302	248	278	362	370	262	178.667	454.889	288.667	187.667	348.333	303.667	11400	0.000338493	PL12's subfamily
GH130_3	518	234	446	86	54	78	94	120	108	120	110	88	314	230	164	218	316	130	142	116	120	178	82	76	282	298	292	444	362	346	366	244	286	264	290	344	399.333	95.3333	228.667	119	337.333	299	7960	0.000236351	GH130's subfamily
CBM13	94	134	56	880	790	1142	912	1160	1142	812	980	1378	872	434	516	378	198	504	64	42	42	92	82	94	338	316	368	436	318	432	294	262	246	300	362	328	94.6667	1021.78	483.667	69.3333	368	298.667	16798	0.000498772	Modules of approx. 150 residues which always appear as a threefold internal repeat. The only apparent exception to this, xylanase II of Actinomadura sp. FC7 (GenBank U08894), is in fact not completely sequenced. These modules were first identified in several plant lectins such as ricin or agglutinin of Ricinus communis which bind galactose residues. The three-dimensional structure of a plant lect…
GH110	246	630	156	164	146	174	218	274	224	228	200	208	446	370	294	254	452	232	236	242	422	354	178	166	358	354	296	556	624	676	288	284	278	286	286	338	344	204	341.333	266.333	477.333	293.333	11138	0.000330713	α-1,3-D-galactosidase (EC 3.2.1.-);Blood group B α-1,3-galactosidase (EC 3.2.1.-);
GH31_4	208	176	166	378	336	462	572	614	602	464	506	570	418	282	206	304	306	304	268	240	328	318	224	174	1410	1326	1318	1484	1380	1730	312	322	290	278	282	264	183.333	500.444	303.333	258.667	1441.33	291.333	18822	0.000558869	GH31's subfamily
GH5_7	144	156	128	176	146	194	152	186	146	192	140	206	468	256	212	622	818	298	134	116	138	136	120	92	682	634	630	678	638	882	296	240	292	382	272	244	142.667	170.889	445.667	122.667	690.667	287.667	11246	0.00033392	GH5's subfamily
CBM35	134	244	156	358	420	688	582	628	538	340	468	538	456	236	250	448	410	392	558	408	556	544	490	444	962	736	770	1708	1658	1460	260	240	284	296	338	296	178	506.667	365.333	500	1215.67	285.667	19294	0.000572884	-
GH53	468	384	386	800	678	768	882	930	908	712	786	860	650	500	464	900	1244	616	402	364	342	666	278	266	852	698	742	976	998	1178	290	276	288	230	288	306	412.667	813.778	729	386.333	907.333	279.667	22376	0.000664396	Endo-β-1,4-galactanase (EC 3.2.1.89);
GH13_45	98	60	64	72	68	82	74	110	94	88	86	68	258	242	258	354	500	300	134	102	176	268	144	100	240	180	192	340	286	422	294	252	250	236	370	248	74	82.4444	318.667	154	276.667	275	7110	0.000211113	GH13's subfamily
GH139	164	318	136	98	118	138	126	166	252	152	146	180	676	454	362	524	836	314	138	174	188	160	94	74	252	204	234	576	452	530	280	278	268	236	288	280	206	152.889	527.667	138	374.667	271.667	9866	0.000292945	α-2-O-Me-L-fucosidase (EC 3.2.1.-);
GH130_2	130	192	134	388	284	348	410	450	504	326	376	378	382	312	240	270	186	194	188	148	198	162	84	76	604	598	530	592	386	670	250	248	232	282	308	302	152	384.889	264	142.667	563.333	270.333	11362	0.000337364	GH130's subfamily
PL6_1	200	176	138	212	144	228	200	238	194	204	232	238	356	306	214	344	448	248	246	222	278	412	256	152	408	392	402	544	360	684	254	232	306	270	284	262	171.333	210	319.333	261	465	268	10284	0.000305356	PL6's subfamily
GH13_33	42	66	36	52	30	98	96	104	126	176	146	138	270	166	156	96	134	66	40	48	60	58	28	36	222	164	186	230	222	328	326	218	202	278	328	252	48	107.333	148	45	225.333	267.333	5224	0.000155113	GH13's subfamily
GH37	748	440	708	352	258	426	452	528	466	646	846	692	430	236	138	262	514	340	234	234	180	518	266	270	300	204	256	748	452	650	304	280	226	246	244	290	632	518.444	320	283.667	435	265	14384	0.000427095	α,α-trehalase (EC 3.2.1.28);
CBM47	98	122	74	190	132	222	198	254	238	250	230	210	508	492	268	272	326	170	112	88	190	174	114	90	276	208	216	198	324	336	232	224	230	280	274	290	98	213.778	339.333	128	259.667	255	8110	0.000240805	Modules of approx 150 residues. Fucose-binding activity demonstrated
GH43_30	44	28	28	258	232	214	232	294	188	176	270	254	206	190	210	172	96	160	150	142	172	240	106	78	384	382	306	264	362	390	248	238	268	234	298	228	33.3333	235.333	172.333	148	348	252.333	7742	0.000229878	GH43's subfamily
GH6	56	94	42	584	514	932	680	752	740	616	638	590	210	208	148	178	98	340	112	108	178	96	72	38	404	390	454	374	262	504	224	266	196	258	324	226	64	671.778	197	100.667	398	249	11906	0.000353517	Endo-β-1,4-glucanase (EC 3.2.1.4);Lichenase / endo-β-1,3-1,4-glucanase (EC 3.2.1.73);Endo-β-1,4-xylanase (EC 3.2.1.8);Cellobiohydrolase (EC 3.2.1.91);
PL14	148	162	102	340	280	336	362	438	400	430	400	438	546	418	236	208	260	286	234	186	250	280	230	194	418	346	374	590	528	686	256	228	248	252	270	228	137.333	380.444	325.667	229	490.333	247	11588	0.000344075	Alginate lyase (EC 4.2.2.-);Endo-β-1,4-glucuronan lyase (EC 4.2.2.14);Oligoalginate lyase / exo-alginate lyase (EC 4.2.2.26);Poly(β-mannuronate) lyase / M-specific alginate lyase (EC 4.2.2.3);
GT115	34	48	28	82	70	94	86	124	106	76	118	90	164	136	76	110	86	112	86	104	102	164	94	96	90	86	120	148	140	148	244	230	238	290	254	218	36.6667	94	114	107.667	122	245.667	4492	0.000133378	UDP-GlcNAc: Dol-PP-GlcNAc β-GlcNAc-transferase (EC 2.4.1.-);
GT11	114	234	78	196	154	206	178	216	130	286	300	242	256	202	136	278	382	222	174	128	168	252	146	82	204	178	192	216	224	308	238	226	238	282	278	198	142	212	246	158.333	220.333	243.333	7542	0.00022394	GDP-L-Fuc: LacNAc-protein α-1,3-L-fucosyltransferase (EC 2.4.1.-);GDP-L-Fuc: galactoside α-1,2-L-fucosyltransferase (EC 2.4.1.69);
PL11_1	90	80	80	436	314	476	392	474	642	550	544	612	538	424	254	204	272	260	108	140	152	140	98	86	268	268	334	338	334	430	208	222	248	254	256	260	83.3333	493.333	325.333	120.667	328.667	241.333	10786	0.000320262	PL11's subfamily
CBM38	92	172	80	354	272	302	358	354	238	292	302	298	594	404	412	370	424	246	324	318	418	350	310	238	400	398	420	790	728	824	238	218	218	262	294	208	114.667	307.778	408.333	326.333	593.333	239.667	12520	0.000371748	The inulin-binding function has been demonstrated in the case of the cycloinulo-oligosaccharide fructanotransferase from Paenibacillus macerans (Bacillus macerans) by Lee et al. (2004) FEMS Microbiol Lett 234:105-10. (PMID:15109727).
GH154	198	176	146	148	204	276	248	342	278	178	192	282	464	356	300	350	308	262	180	148	222	222	108	62	388	324	356	644	454	556	220	266	194	296	248	214	173.333	238.667	340	157	453.667	239.667	9810	0.000291282	Allolactose exo-β-1,6-galactosidase (EC 3.2.1.-);β-1,6-D-glucuronidase (EC 3.2.1.-);
GH5_19	244	248	192	354	266	348	318	396	326	420	378	322	718	474	408	342	316	196	336	256	296	196	214	150	332	316	362	412	330	514	190	260	204	284	216	284	228	347.556	409	241.333	377.667	239.667	11418	0.000339027	GH5's subfamily
GH5_12	326	252	300	306	260	318	340	270	354	402	338	288	934	668	506	732	646	386	154	140	182	70	146	74	116	88	70	206	102	174	244	266	202	226	238	248	292.667	319.556	645.333	127.667	126	237.333	10572	0.000313907	GH5's subfamily
GH104	20	42	16	106	112	118	136	126	80	86	90	86	96	90	50	42	114	24	258	290	232	384	272	170	414	420	354	220	316	294	222	238	172	270	300	218	26	104.444	69.3333	267.667	336.333	236.667	6478	0.000192347	Peptidoglycan lytic transglycosylase / peptidoglycan lyase (EC 4.2.2.-);
PL39	130	150	110	230	212	232	272	326	258	314	328	258	350	334	224	708	704	480	78	132	94	98	70	54	194	176	148	560	292	464	192	262	250	210	288	212	130	270	466.667	87.6667	305.667	235.667	9394	0.00027893	Poly-(MG)-lyase / MG-specific alginate lyase (EC 4.2.2.-);Poly(α-L-guluronate) lyase / G-specific alginate lyase (EC 4.2.2.11);Poly(β-mannuronate) lyase / M-specific alginate lyase (EC 4.2.2.3);
GH13_42	44	56	20	4	6	8	16	16	10	0	20	10	28	46	126	22	30	28	118	72	90	46	86	54	310	332	326	178	194	210	234	218	190	286	270	192	40	10	46.6667	77.6667	258.333	231.667	3896	0.000115681	GH13's subfamily
GH31_2	18	14	26	14	12	36	36	38	36	14	14	40	104	52	62	164	150	142	192	166	298	376	100	50	150	96	128	64	196	174	270	242	238	142	230	262	19.3333	26.6667	112.333	197	134.667	230.667	4346	0.000129043	GH31's subfamily
PL41	224	234	214	392	334	354	464	514	372	396	418	372	468	368	230	470	594	316	124	84	182	94	120	92	250	198	178	150	172	276	256	234	196	194	258	218	224	401.778	407.667	116	204	226	10010	0.00029722	Poly(β-mannuronate) lyase / M-specific alginate lyase (EC 4.2.2.3);
GH43_10	206	224	138	368	298	436	422	528	384	390	388	442	526	288	270	376	448	282	108	120	186	200	76	74	562	558	662	776	666	838	248	212	198	192	230	260	189.333	406.222	365	127.333	677	223.333	12580	0.00037353	GH43's subfamily
CE6	236	470	196	328	252	304	462	514	264	334	356	402	590	320	288	464	444	360	234	232	342	286	224	156	618	530	454	832	716	1002	240	190	190	222	238	234	300.667	357.333	411	245.667	692	219	13524	0.000401559	Acetylxylan esterase (EC 3.1.1.72);
GH24	164	80	184	174	158	206	180	234	126	156	128	208	124	146	154	350	686	248	202	182	132	430	318	204	226	292	254	150	182	172	184	156	192	198	370	208	142.667	174.444	284.667	244.667	212.667	218	7758	0.000230353	Lysozyme (EC 3.2.1.17);
GT102	124	76	108	188	156	202	168	226	148	144	164	216	304	218	228	230	218	126	156	134	234	162	102	60	280	226	210	190	262	316	218	222	164	220	224	260	102.667	179.111	220.667	141.333	247.333	218	6884	0.000204402	DTDP-L-Rha: N-acetylglucosaminyl-PP-decaprenol α-1,3-L-rhamnosyltransferase (EC 2.4.1.289);
CBM34	84	148	54	56	76	102	94	106	168	98	124	118	346	310	214	320	304	198	72	70	62	78	108	70	156	148	166	140	162	188	210	186	158	274	282	192	95.3333	104.667	282	76.6667	160	217	5642	0.000167524	Modules of approx. 120 residues. Granular starch-binding function has been demonstrated in the case of Thermoactinomyces vulgaris R-47 α-amylase 1 (TVAI).
GH142	230	334	184	172	190	252	236	334	180	220	254	244	436	324	300	292	272	334	124	112	166	222	100	80	294	218	208	590	532	586	180	182	164	230	198	272	249.333	231.333	326.333	134	404.667	204.333	9246	0.000274535	β-L-arabinofuranosidase (EC 3.2.1.185);
GH51	62	132	74	226	200	282	266	326	280	250	328	348	228	140	142	150	222	212	124	116	164	136	44	44	250	266	262	306	278	388	166	220	184	184	230	222	89.3333	278.444	182.333	104.667	291.667	201	7452	0.000221267	Arabinoxylan exo-α-1,3-L-arabinofuranosidase (EC 3.2.1.-);Xylan β-1,4-xylosidase (EC 3.2.1.37);Endo-β-1,4-glucanase (EC 3.2.1.4);α-L-arabinofuranosidase (EC 3.2.1.55);Endo-β-1,3(4)-glucanase / lichenase-laminarinase (EC 3.2.1.6);Endo-β-1,4-xylanase (EC 3.2.1.8);Cellobiohydrolase (EC 3.2.1.91);
GH5_36	162	166	132	108	94	178	120	150	210	154	176	106	380	252	242	220	354	144	86	72	100	82	78	56	454	416	418	690	492	624	210	200	196	190	214	194	153.333	144	265.333	79	515.667	200.667	8120	0.000241102	GH5's subfamily
GT92	90	114	70	148	122	150	196	166	174	230	240	216	260	264	202	206	270	102	106	150	140	194	96	100	328	338	330	284	368	392	180	198	188	214	200	218	91.3333	182.444	217.333	131	340	199.667	7244	0.000215091	UDP-Gal: N-glycan core α-1,6-fucoside β-1,4-galactosyltransferase (EC 2.4.1.-);UDP-Gal: β-1,4-galactan β-1,4-galactosyltransferase / β-1,4-galactan synthase (EC 2.4.1.-);UDP-Gal: β-galactoside β-1,4-galactosyltransferase (EC 2.4.1.-);UDP-L-Arap: α-arabinopyranosyltransferase (EC 2.4.2.-);
PL1	186	134	112	410	482	504	454	596	516	432	548	532	548	348	300	584	728	412	134	90	172	148	158	148	434	318	324	754	508	650	198	182	168	226	188	234	144	497.111	486.667	141.667	498	199.333	12860	0.000381843	Poly α-D-N-acetylgalactosaminuric acid lyase (EC 4.2.2.-);Pectin lyase (EC 4.2.2.10);Pectate lyase (EC 4.2.2.2);Exo-polygalacturonate lyase (EC 4.2.2.9);
GH5_46	202	394	216	66	62	74	94	74	84	106	108	64	386	242	250	222	510	186	108	82	82	250	84	74	332	274	242	506	364	458	246	180	196	162	168	222	270.667	81.3333	299.333	113.333	362.667	195.667	7370	0.000218833	GH5's subfamily
PL4	228	214	162	450	426	500	488	586	444	464	586	668	374	348	306	322	250	342	114	102	120	142	164	168	238	198	280	482	296	520	198	192	224	196	180	180	201.333	512.444	323.667	135	335.667	195	11152	0.000331129	Rhamnogalacturonan endolyase (EC 4.2.2.23);
PL10_3	64	68	68	366	252	296	224	340	220	262	276	218	378	318	218	238	238	190	132	182	220	254	212	142	280	214	252	374	358	406	160	164	150	244	212	228	66.6667	272.667	263.333	190.333	314	193	8418	0.00024995	PL10's subfamily
GH13_32	84	70	36	86	98	142	104	110	176	126	84	172	200	122	250	118	66	122	88	74	50	146	98	138	178	152	214	106	136	148	198	200	144	204	212	190	63.3333	122	146.333	99	155.667	191.333	4842	0.00014377	GH13's subfamily
GT22	280	222	226	486	456	488	510	530	492	442	474	396	600	462	378	366	418	318	204	136	234	130	300	228	280	272	222	414	380	520	228	196	158	186	166	202	242.667	474.889	423.667	205.333	348	189.333	12000	0.000356308	Dol-P-Man: Man2-GlcNAc-phosphatidylinositol α-1,2-mannosyltransferase (EC 2.4.1.-);Dol-P-Man: Man3-GlcNAc-phosphatidylinositol α-1,2-mannosyltransferase (EC 2.4.1.-);Dol-P-Man: Man6GlcNAc2-PP-Dol α-1,2-mannosyltransferase (EC 2.4.1.259);Dol-P-Man: Man7GlcNAc2-PP-Dol α-1,6-mannosyltransferase (EC 2.4.1.260);Dol-P-Man: Man8GlcNAc2-PP-Dol α-1,2-mannosyltransferase (EC 2.4.1.261);
CBM61	100	102	70	232	284	340	360	374	386	326	318	444	304	236	200	190	204	178	68	56	32	28	28	48	38	42	46	40	62	70	192	180	190	172	218	176	90.6667	340.444	218.667	43.3333	49.6667	188	6334	0.000188071	Modules of approx. 150 residues found appended to GH16, GH30, GH31, GH43, GH53 and GH66 catalytic domains. A β-1,4-galactan binding function has been demonstrated for the CBM61 of Thermotoga maritima GH53 galactanase [PMID: 20826814].
GH143	332	242	308	156	146	212	220	216	252	152	236	204	358	248	254	528	800	418	196	148	230	106	124	94	396	316	418	744	580	800	214	194	184	160	200	170	294	199.333	434.333	149.667	542.333	187	10556	0.000313432	2-keto-3-deoxy-D-lyxo-heptulosaric acid hydrolase (EC 3.2.1.-);
GH130_9	194	184	186	466	368	430	480	426	552	510	550	382	360	322	252	290	308	320	304	278	248	180	166	146	388	440	500	610	316	698	246	158	186	184	184	148	188	462.667	308.667	220.333	492	184.333	11960	0.00035512	GH130's subfamily
GH44	116	112	86	290	256	324	372	294	492	364	518	420	364	336	186	316	224	214	58	66	68	62	62	24	130	134	108	278	146	324	188	178	170	190	196	168	104.667	370	273.333	56.6667	186.667	181.667	7834	0.00023261	Xyloglucan-specific endo-β-1,4-glucanase / endo-xyloglucanase (EC 3.2.1.151);Endo-β-1,4-glucanase (EC 3.2.1.4);Endo-β-1,4-xylanase (EC 3.2.1.8);
PL29	228	190	144	252	192	330	270	366	274	246	308	350	342	324	300	312	452	292	74	118	108	136	140	154	274	196	208	618	548	488	206	160	222	150	184	156	187.333	287.556	337	121.667	388.667	179.667	9312	0.000276495	Chondroitin-sulfate ABC endolyase (EC 4.2.2.20);
PL35	124	320	88	164	106	134	202	188	154	174	240	142	262	204	240	222	190	158	56	82	110	174	126	76	290	274	304	514	400	502	182	194	140	162	224	176	177.333	167.111	212.667	104	380.667	179.667	7298	0.000216695	Chondroitin lyase / chondroitinase (EC 4.2.2.-);
GH43_1	250	144	294	46	36	102	84	74	120	50	26	72	198	144	120	176	220	122	24	42	48	90	28	34	164	150	204	202	138	268	162	154	166	204	186	188	229.333	67.7778	163.333	44.3333	187.667	176.667	4730	0.000140445	GH43's subfamily
GH166	74	114	70	122	122	160	144	280	132	118	128	162	376	212	174	398	304	196	66	60	80	62	82	42	102	96	84	78	56	124	134	146	128	190	292	152	86	152	276.667	65.3333	90	173.667	5260	0.000156182	[retaining] endo-α-1,4-N-acetylgalactosaminidase (EC 3.2.1.- );
GH5_25	222	314	140	84	80	94	134	110	156	70	78	82	250	202	162	242	298	216	122	148	154	204	88	56	262	154	230	398	372	414	180	164	156	206	190	136	225.333	98.6667	228.333	128.667	305	172	6568	0.000195019	GH5's subfamily
GH19_1	74	72	98	124	124	142	156	180	128	146	180	154	74	76	62	130	236	96	108	126	82	100	150	66	242	218	252	206	180	260	168	124	150	162	258	156	81.3333	148.222	112.333	105.333	226.333	169.667	5260	0.000156182	GH19's subfamily
GH71	4	2	0	0	2	0	0	0	0	0	10	2	4	0	10	6	24	4	34	32	94	70	12	14	32	24	18	38	42	42	166	166	130	190	216	136	2	1.55556	8	42.6667	32.6667	167.333	1524	4.52511e-05	Endo-α-1,3-glucanase / mutanase (EC 3.2.1.59);
GH129	122	90	92	70	90	148	132	114	156	172	186	142	396	274	244	220	304	162	172	176	318	102	106	108	326	302	254	550	502	690	144	156	174	178	180	152	101.333	134.444	266.667	163.667	437.333	164	7704	0.00022875	[retaining] α-1,3-(3,6)-anhydro-D-galactosidase (EC 3.2.1.-);α-N-acetylgalactosaminidase (EC 3.2.1.49);
GH108	132	94	80	176	156	198	116	192	130	100	100	132	206	126	140	158	316	134	82	46	62	146	86	62	122	84	64	92	100	102	160	128	152	136	230	172	102	144.444	180	80.6667	94	163	4712	0.00013991	Lysozyme (EC 3.2.1.17);
GH168	116	116	86	118	60	124	166	204	204	140	164	130	194	138	128	240	264	172	200	188	230	202	112	94	282	220	202	238	292	362	138	142	170	158	182	188	106	145.556	189.333	171	266	163	6364	0.000188962	Fucoidan (Ib) endo-α-1,3-L-fucosidase (EC 3.2.1.-);
GT85	16	14	12	130	68	120	128	152	62	120	108	94	50	50	32	42	36	50	4	12	12	14	24	18	16	8	8	24	14	34	146	152	108	146	262	160	14	109.111	43.3333	14	17.3333	162.333	2446	7.26275e-05	β-D-arabinofuranosyl monophosphoryldecaprenol: galactan α-D-arabinofuranosyltransferase (EC 2.4.2.-);β-D-arabinofuranosyl-1-monophosphoryldecaprenol : arabinan β-1,2-arabinofuranosyltransferase (EC 2.4.2.-);
GH5_28	94	58	70	176	164	188	184	216	152	150	178	144	184	234	174	246	270	182	80	88	110	120	56	40	48	42	64	234	134	162	202	144	126	172	174	148	74	172.444	215	82.3333	114	161	5208	0.000154638	GH5's subfamily
GH43_18	120	72	106	344	222	370	382	438	410	432	326	474	444	330	204	230	340	194	94	128	140	114	84	48	360	302	272	478	438	508	218	132	148	126	156	170	99.3333	377.556	290.333	101.333	393	158.333	9354	0.000277742	GH43's subfamily
PL14_3	94	96	80	84	68	94	76	100	74	70	46	118	162	116	100	238	250	164	166	192	148	352	236	156	458	454	482	380	440	536	138	140	144	166	172	180	90	81.1111	171.667	208.333	458.333	156.667	6970	0.000206956	PL14's subfamily
GH30	280	196	274	240	252	288	402	438	444	320	394	378	356	208	230	356	422	386	112	94	170	96	70	38	474	488	520	992	676	810	144	172	160	170	152	136	250	350.667	326.333	96.6667	660	155.667	11338	0.000336652	β-1,6-glucosidase (EC 3.2.1.-);Glucuronoxylan endo-β-1,4-xylanase (EC 3.2.1.-);Xylan exo-β-1,4-xylobiosidase (EC 3.2.1.-);Glucuronoarabinoxylan-specific endo-β-1,4-xylanase (EC 3.2.1.136);[inverting] oligosaccharide reducing-end xylanase (EC 3.2.1.156);Endo-β-1,6-galactanase (EC 3.2.1.164);Baicalin β-glucuronidase (EC 3.2.1.167);β-glucosidase (EC 3.2.1.21);Galactan exo-1,6-β-galactobiohydrolase (…
PL10_1	124	108	150	336	330	334	442	428	430	350	308	476	396	242	224	180	146	194	66	90	72	84	44	60	130	76	128	248	216	300	150	150	130	162	152	182	127.333	381.556	230.333	69.3333	183	154.333	7638	0.00022679	PL10's subfamily
GH130_6	102	98	126	118	62	126	118	84	144	102	124	66	212	154	166	228	180	102	108	80	148	52	68	36	404	364	362	444	334	522	168	136	164	152	158	126	108.667	104.889	173.667	82	405	150.667	6138	0.000182252	GH130's subfamily
GH5_42	124	98	68	98	90	174	86	138	120	68	110	74	254	124	194	260	302	182	138	130	114	180	106	106	164	120	136	126	186	208	190	180	152	120	134	100	96.6667	106.444	219.333	129	156.667	146	5154	0.000153034	GH5's subfamily
GH115	318	372	486	358	316	488	446	534	568	476	440	540	358	206	154	158	216	226	212	148	200	134	208	96	1028	884	956	1128	1044	1318	126	146	138	160	170	134	392	462.889	219.667	166.333	1059.67	145.667	14890	0.000442119	α-1,6-(4-O-methyl)-glucuronidase (EC 3.2.1.-);Xylan α-1,2-(4-O-methyl)-glucuronidase (EC 3.2.1.131);
GH16_14	58	54	52	76	54	64	50	106	54	62	94	86	124	120	64	64	108	68	66	62	82	34	22	20	112	76	94	124	112	110	98	126	144	198	148	154	54.6667	71.7778	91.3333	47.6667	104.667	144.667	3140	9.32339e-05	GH16's subfamily
GT73	136	138	68	146	102	126	140	142	172	120	168	152	84	100	68	82	128	78	78	56	104	250	94	20	206	176	228	156	122	150	154	130	152	156	136	140	114	140.889	90	100.333	173	144.667	4658	0.000138307	[inverting] CMP-β-KDO: α-3-deoxy-D-manno-octulosonic-acid (KDO) transferase (EC 2.4.3.-);
GH120	150	114	102	256	136	232	218	256	212	240	180	226	228	226	150	198	236	148	110	86	126	98	102	72	160	148	96	234	146	238	130	146	156	128	152	140	122	217.333	197.667	99	170.333	142	5976	0.000177441	Xylan β-1,4-xylosidase (EC 3.2.1.37);
GH79	38	24	26	122	116	184	146	176	172	240	184	142	88	150	108	136	58	140	156	140	184	180	102	104	556	688	684	470	604	644	136	118	160	122	160	152	29.3333	164.667	113.333	144.333	607.667	141.333	7610	0.000225959	β-4-O-methyl-glucuronidase (EC 3.2.1.-);Glycyrrhizin β-glucuronidase (EC 3.2.1.128);Heparanase / endo-β-glucuronidase (EC 3.2.1.166);Baicalin β-glucuronidase (EC 3.2.1.167);β-glucuronidase (EC 3.2.1.31);Hyaluronidase / hyaluronoglucuronidase (EC 3.2.1.36);
GH5_40	2	0	4	14	28	8	20	22	28	18	24	18	0	8	8	0	4	8	58	70	114	102	44	34	134	116	112	76	92	118	162	112	166	144	122	138	2	20	4.66667	70.3333	108	140.667	2128	6.31853e-05	GH5's subfamily
GT101	2	0	0	4	2	10	6	4	8	12	6	10	4	2	6	0	6	6	2	4	14	10	4	0	28	38	36	8	20	40	64	60	78	100	402	140	0.666667	6.88889	4	5.66667	28.3333	140.667	1136	3.37305e-05	Hexosyltransferases (EC 2.4.1.-);
GH182	148	84	104	76	64	86	104	128	98	92	86	102	350	190	216	300	236	252	170	164	202	156	168	152	196	182	236	238	236	370	146	120	140	154	158	120	112	92.8889	257.333	168.667	243	139.667	6024	0.000178867	β-D-galactofuranosidase (EC 3.2.1.146);
GT50	70	128	58	40	50	46	40	60	62	50	44	78	30	46	8	72	20	100	26	10	10	32	10	6	78	38	62	6	38	54	142	112	102	164	200	114	85.3333	52.2222	46	15.6667	46	139	2206	6.55013e-05	Dol-P-Man α-1,4-mannosyltransferase (EC 2.4.1.-);
CBM56	58	70	54	114	178	308	194	242	222	196	292	220	252	170	110	134	116	150	66	92	74	108	82	74	178	206	224	246	174	264	126	152	106	138	128	170	60.6667	218.444	155.333	82.6667	215.333	136.667	5688	0.00016889	β-1,3-glucan binding function demonstrated by Yamamoto et al. (1998) FEBS Letters 433:41-43 [PMID: 9738929]
PL6_2	200	158	140	250	186	192	202	240	228	186	290	186	314	204	230	290	224	206	106	126	164	180	134	92	182	188	188	270	172	338	150	122	110	126	164	146	166	217.778	244.667	133.667	223	136.333	6884	0.000204402	PL6's subfamily
GH16_9	10	8	4	50	64	66	56	68	54	96	76	78	18	28	38	26	22	30	4	4	4	4	0	10	2	2	4	4	10	12	134	136	86	182	154	122	7.33333	67.5556	27	4.33333	5.66667	135.667	1666	4.94674e-05	GH16's subfamily
GH43_26	32	82	46	538	490	672	616	740	856	590	526	804	646	292	292	462	514	366	118	104	126	160	160	108	850	786	792	816	860	890	100	128	100	164	164	148	53.3333	648	428.667	129.333	832.333	134	15138	0.000449483	GH43's subfamily
GH91	190	118	174	128	120	166	198	212	116	242	192	178	176	178	136	306	214	208	116	90	148	84	72	74	214	198	156	212	144	202	152	158	134	118	116	126	160.667	172.444	203	97.3333	187.667	134	5766	0.000171206	Di-fructofuranose 1,2':2,3' dianhydride hydrolase (DFA IIIase) (EC 3.2.1.-);Inulin fructotransferase (DFA-I-forming) (EC 4.2.2.17);Inulin fructotransferase (DFA-III-forming) (EC 4.2.2.18);
GH96	94	62	48	24	18	44	34	30	50	52	50	32	94	62	70	30	28	56	72	40	74	66	32	38	56	42	68	94	98	112	138	146	130	114	122	154	68	37.1111	56.6667	53.6667	78.3333	134	2474	7.34588e-05	α-agarase (EC 3.2.1.158);
GH164	172	174	156	112	124	224	204	194	260	198	192	260	280	198	234	156	240	104	104	110	104	30	54	32	290	262	228	286	204	368	138	146	146	120	140	102	167.333	196.444	202	72.3333	273	132	6346	0.000188428	β-mannosidase (EC 3.2.1.25);
GH130_1	146	194	174	102	114	170	186	200	190	174	206	202	214	132	148	232	402	276	90	82	98	116	68	66	474	518	546	596	648	714	152	120	144	118	116	134	171.333	171.556	234	86.6667	582.667	130.667	8262	0.000245318	GH130's subfamily
GT116	90	112	104	76	66	74	110	80	62	56	96	102	94	70	72	138	264	72	104	116	108	204	78	56	238	272	244	158	196	212	130	142	122	146	112	132	102	80.2222	118.333	111	220	130.667	4508	0.000133853	UDP-GalA: RGI α-1,2-galacturonosyltransferase (EC 2.4.1.-);
CBM37	50	60	36	40	54	54	100	70	56	62	90	128	92	70	46	98	92	64	68	100	102	98	92	64	208	190	190	248	202	298	130	160	128	140	124	98	48.6667	72.6667	77	87.3333	222.667	130	3902	0.00011586	Modules of approx. 100 residues, conserved in numerous R. albus polysaccharide-degrading enzymes and other proteins from this bacterium. Several members of CBM37 have been shown to exhibit rather broad binding specificity to xylan, chitin, microcrystalline and phosphoric-acid swollen cellulose, as well as more heterogeneous substrates, such as alfalfa cell walls, banana stem and wheat straw.
GH181	228	178	124	92	72	102	82	150	90	82	122	112	120	168	98	90	124	112	138	86	174	122	94	86	226	228	210	278	328	364	168	120	142	88	102	154	176.667	100.444	118.667	116.667	272.333	129	5254	0.000156004	Exo-α-sialidase (EC 3.2.1.18);
GH157	118	104	112	88	96	94	122	112	142	116	128	170	192	150	120	246	430	150	162	124	162	292	138	128	126	124	128	208	194	172	134	156	148	114	124	96	111.333	118.667	214.667	167.667	158.667	128.667	5420	0.000160932	Endo-β-1,3-glucanase / laminarinase (EC 3.2.1.39);
GT55	120	50	74	236	150	144	180	158	144	120	150	132	392	236	254	150	176	120	40	74	80	302	68	104	102	88	86	68	42	68	100	92	158	152	146	124	81.3333	157.111	221.333	111.333	75.6667	128.667	4880	0.000144899	Mannosyl-3-phosphoglycerate synthase / [retaining] GDP-Man: 3-phosphoglycerate α-mannosyltransferase (EC 2.4.1.217);
GH30_4	38	60	36	50	68	84	74	56	236	104	110	144	160	136	146	168	108	72	46	36	34	92	6	16	104	76	52	204	132	256	150	114	142	116	118	126	44.6667	102.889	131.667	38.3333	137.333	127.667	3670	0.000108971	GH30's subfamily
CBM22	104	76	42	180	114	226	168	154	152	118	118	136	156	116	118	138	106	76	86	86	106	126	132	128	256	272	216	364	246	446	130	134	140	92	136	132	74	151.778	118.333	110.667	300	127.333	5526	0.00016408	A xylan binding function has been demonstrated in several cases and affinity with mixed β-1,3/β-1,4-glucans in one. In several cases a thermostabilizing effect has also been seen.
GH159	74	106	74	160	188	262	204	250	212	194	180	248	230	148	146	154	128	132	46	56	58	30	48	34	216	230	178	300	216	298	134	100	128	120	154	122	84.6667	210.889	156.333	45.3333	239.667	126.333	5558	0.00016503	β-D-galactofuranosidase (EC 3.2.1.146);α-L-arabinofuranosidase (EC 3.2.1.55);
GT13	66	52	64	38	14	36	56	42	76	38	54	52	124	86	96	68	86	34	58	34	50	104	50	12	116	78	70	56	22	106	112	134	158	112	104	138	60.6667	45.1111	82.3333	51.3333	74.6667	126.333	2596	7.70813e-05	Hexosyltransferases (EC 2.4.1.-);α-1,3-mannosyl-glycoprotein β-1,2-N-acetylglucosaminyltransferase (EC 2.4.1.101);
PL9_4	116	110	96	160	108	142	146	172	134	146	142	130	382	270	260	174	250	138	76	92	82	114	178	100	232	146	178	580	270	466	108	156	120	138	120	110	107.333	142.222	245.667	107	312	125.333	6342	0.000188309	PL9's subfamily
GH156	132	92	90	122	80	90	114	162	134	190	266	134	152	150	96	120	196	110	134	132	100	214	86	70	110	96	92	552	240	574	166	104	126	128	104	116	104.667	143.556	137.333	122.667	277.333	124	5574	0.000165505	Exo-α-sialidase (EC 3.2.1.18);
GH43_5	54	78	50	714	640	1154	960	1164	1006	844	820	1230	588	280	276	278	190	376	60	42	118	82	100	74	594	548	564	882	706	768	148	100	104	110	132	138	60.6667	948	331.333	79.3333	677	122	15972	0.000474246	GH43's subfamily
CE17	98	144	96	360	286	354	322	416	322	396	390	326	202	198	90	168	188	144	164	104	170	238	128	94	286	224	242	474	280	520	120	112	98	132	138	124	112.667	352.444	165	149.667	337.667	120.667	8148	0.000241933	Acetylmannan esterase (EC 3.1.1.-);
GH147	214	202	222	188	164	206	230	240	290	166	262	196	196	178	118	196	382	164	106	92	116	76	80	50	370	340	368	402	352	568	132	100	108	138	122	124	212.667	215.778	205.667	86.6667	400	120.667	7458	0.000221445	β-galactosidase (EC 3.2.1.23);Endo-β-1,4-galactanase (EC 3.2.1.89);
CBM88	238	126	110	52	130	182	90	154	128	72	92	166	220	162	172	288	624	242	138	136	140	242	76	104	282	156	178	406	404	276	112	126	146	102	110	126	158	118.444	284.667	139.333	283.667	120.333	6508	0.000193238	Binding to terminal galactose in galactoxyloglucan and galactomannan
PL26	106	48	80	148	124	188	194	116	176	296	256	270	136	112	94	86	116	86	50	52	34	62	94	54	186	208	148	392	230	384	124	118	96	116	136	126	78	196.444	105	57.6667	258	119.333	5242	0.000155647	Rhamnogalacturonan exolyase (EC 4.2.2.24);
GH130	114	96	108	442	296	332	266	308	236	248	318	298	320	260	184	162	192	152	136	126	114	118	96	74	296	276	244	342	288	500	126	104	110	106	132	134	106	304.889	211.667	110.667	324.333	118.667	7654	0.000227265	[inverting] β-mannoside phosphorylase (EC 2.4.1.-);β-1,3-oligomannan phosphorylase (EC 2.4.1.-);β-1,4-mannosylglucose phosphorylase (EC 2.4.1.281);β-1,4-mannooligosaccharide phosphorylase (EC 2.4.1.319);β-1,4-mannosyl-N-acetyl-glucosamine phosphorylase (EC 2.4.1.320);β-1,2-mannobiose phosphorylase (EC 2.4.1.339);β-1,2-oligomannan phosphorylase (EC 2.4.1.340);β-1,2-mannosidase (EC 3.2.1.197);
GH125	42	60	68	184	86	172	184	190	180	268	246	176	196	140	130	106	166	102	154	134	220	260	142	58	346	258	296	750	628	650	102	114	120	118	122	122	56.6667	187.333	140	161.333	488	116.333	7290	0.000216457	Mannosyl-oligosaccharide α-1,6-mannosidase / exo-α-1,6-mannosidase (EC 3.2.1.163);
GH137	150	154	102	202	156	210	248	240	242	236	312	242	214	270	124	258	314	212	68	56	66	72	54	72	284	260	308	546	356	504	132	114	96	124	104	116	135.333	232	232	64.6667	376.333	114.333	7218	0.000214319	β-L-arabinofuranosidase (EC 3.2.1.185);
GH12	14	18	2	44	76	134	72	96	84	42	36	94	56	88	58	82	54	56	8	10	16	14	4	6	28	32	42	90	88	78	114	102	78	132	128	112	11.3333	75.3333	65.6667	9.66667	59.6667	111	2188	6.49668e-05	Xyloglucan-specific endo-β-1,4-glucanase / endo-xyloglucanase (EC 3.2.1.151);Endo-β-1,4-glucanase (EC 3.2.1.4);Lichenase / endo-β-1,3-1,4-glucanase (EC 3.2.1.73);
GH130_4	96	108	94	278	184	314	222	342	278	204	324	264	266	134	106	170	198	102	94	58	154	100	38	60	158	120	134	152	136	134	108	104	100	128	86	138	99.3333	267.778	162.667	84	139	110.667	5686	0.000168831	GH130's subfamily
GH43_34	88	102	110	288	272	396	368	518	504	366	386	574	632	316	296	360	396	252	40	36	56	60	58	18	144	116	130	308	258	274	134	106	96	120	94	114	100	408	375.333	44.6667	205	110.667	8386	0.000249	GH43's subfamily
GH43_28	110	60	106	92	82	88	126	132	118	78	132	92	184	118	74	100	110	108	18	70	44	38	26	14	62	36	52	158	146	230	96	124	78	114	138	108	92	104.444	115.667	35	114	109.667	3462	0.000102795	GH43's subfamily
GH43_17	32	22	24	260	236	232	304	300	372	330	384	398	226	124	94	152	120	102	36	62	50	42	32	32	644	550	604	562	392	578	110	88	82	126	146	94	26	312.889	136.333	42.3333	555	107.667	7942	0.000235817	GH43's subfamily
GH55_2	34	34	38	68	48	48	40	54	58	42	40	34	94	58	72	54	86	68	54	62	94	58	60	62	156	184	132	394	230	324	134	84	96	70	138	102	35.3333	48	72	65	236.667	104	3404	0.000101073	GH55's subfamily
PL37	62	214	50	42	44	44	42	28	50	44	70	24	74	66	74	60	40	48	82	50	118	30	42	44	82	82	100	24	74	70	96	106	120	92	110	100	108.667	43.1111	60.3333	61	72	104	2498	7.41715e-05	Ulvan lyase (EC 4.2.2.-);Chondroitin-sulfate ABC endolyase (EC 4.2.2.20);Heparin-sulfate lyase / heparin lyase III (EC 4.2.2.8);
AA5_2	118	62	56	190	168	166	218	154	180	152	142	164	160	144	172	64	148	120	142	130	116	182	132	148	252	248	246	254	180	270	86	128	96	106	98	108	78.6667	170.444	134.667	141.667	241.667	103.667	5500	0.000163308	AA5's subfamily
GH16_5	4	14	22	54	22	34	36	32	34	50	52	24	64	34	34	30	44	28	84	74	46	202	40	42	132	84	102	184	134	190	88	86	104	110	124	110	13.3333	37.5556	39	81.3333	137.667	103.667	2548	7.56561e-05	GH16's subfamily
GH55_3	112	160	78	250	168	208	202	218	232	228	280	168	176	128	124	136	134	106	112	120	186	240	138	90	504	440	480	846	684	828	138	76	110	96	98	94	116.667	217.111	134	147.667	630.333	102	8388	0.000249059	GH55's subfamily
AA1_2	126	104	112	194	128	224	182	232	148	172	194	176	174	160	146	124	152	172	20	20	54	44	66	60	76	66	62	28	46	62	112	92	72	130	98	100	114	183.333	154.667	44	56.6667	100.667	4128	0.00012257	AA1's subfamily
PL9_3	92	64	112	316	236	258	232	290	176	242	308	204	220	196	200	168	136	164	108	80	114	72	94	98	64	134	96	122	136	130	88	106	76	130	96	100	89.3333	251.333	180.667	94.3333	113.667	99.3333	5458	0.000162061	PL9's subfamily
GH167	152	124	126	102	100	120	154	168	178	204	212	210	228	158	132	158	210	160	60	66	84	74	58	24	160	102	124	440	194	392	88	72	94	118	94	110	134	160.889	174.333	61	235.333	96	5250	0.000155885	β-neocarrabiosidase (EC 3.2.1.-);魏-neocarrabiosidase (EC 3.2.1.-);
GH43_31	22	34	38	38	30	46	46	34	66	28	32	24	138	90	52	58	68	68	36	26	50	62	44	28	48	48	42	64	82	68	92	88	88	98	102	108	31.3333	38.2222	79	41	58.6667	96	2086	6.19382e-05	GH43's subfamily
PL11_2	68	78	84	120	98	176	142	194	246	166	150	182	276	212	174	144	138	186	66	68	146	86	100	52	220	148	220	462	300	390	94	88	102	96	100	96	76.6667	163.778	188.333	86.3333	290	96	5668	0.000168296	PL11's subfamily
GT10	254	224	192	474	298	414	468	592	490	468	544	502	308	238	188	246	282	222	160	124	110	172	126	132	160	106	156	134	240	260	92	94	84	88	120	96	223.333	472.222	247.333	137.333	176	95.6667	8858	0.000263015	4-galactosyl-N-acetylglucoside 3-α-L-fucosyltransferase (EC 2.4.1.152);Glycoprotein 3-α-L-fucosyltransferase (EC 2.4.1.214);3-galactosyl-N-acetylglucoside 4-α-L-fucosyltransferase (EC 2.4.1.65);
CBM84	66	90	46	130	78	150	132	158	122	116	104	128	184	158	120	82	74	48	58	52	98	62	104	60	76	58	66	148	144	188	138	64	114	100	80	68	67.3333	124.222	111	72.3333	113.333	94	3664	0.000108793	Modules of approx. 140 aminoacids appended to enzymes of different families of CAZymes. A xanthan-binding function was reported for the GH9 xanthanase of Paenibacillus nanensis by Moroz et al. ACS Catal., 2018, 8 (7), pp 6021-6034.
CBM8	64	76	66	110	102	174	158	144	148	60	72	96	180	170	144	200	152	96	68	52	46	86	138	114	76	64	72	154	112	114	102	102	108	68	92	78	68.6667	118.222	157	84	98.6667	91.6667	3858	0.000114553	The cellulose-binding module from a cellulase of the slime mold Dictyostelium discoideum has been experimentally shown to bind cellulose.
PL15	50	50	76	40	36	56	36	64	74	60	86	26	140	124	86	86	134	66	90	70	144	48	54	38	162	94	124	312	178	252	108	72	74	84	122	90	58.6667	53.1111	106	74	187	91.6667	3406	0.000101132	Exo-heparin lyase (reducing-end specific) (EC 4.2.2.-);Oligoalginate lyase / exo-alginate lyase (EC 4.2.2.26);Poly(β-mannuronate) lyase / M-specific alginate lyase (EC 4.2.2.3);
GH51_14	26	26	20	124	138	212	214	228	272	122	158	124	256	174	154	120	206	70	86	84	120	82	58	62	194	206	146	140	198	224	100	72	98	66	94	112	24	176.889	163.333	82	184.667	90.3333	4786	0.000142108	GH51's subfamily
CBM92	38	28	24	84	60	80	78	78	38	100	120	94	118	102	126	92	78	64	14	24	30	66	28	12	36	82	20	54	66	66	70	88	72	76	130	92	30	81.3333	96.6667	29	54	88	2428	7.2093e-05	β-1,3- and β-1,6-glucan binding
PL38	152	184	110	122	96	140	130	202	118	172	134	168	316	210	146	202	470	144	94	70	130	152	88	22	180	180	200	402	280	334	102	86	86	84	82	88	148.667	142.444	248	92.6667	262.667	88	5876	0.000174472	Exo-β-1,4-glucuronan lyase (EC 4.2.2.-);Poly-(MG)-lyase / MG-specific alginate lyase (EC 4.2.2.-);Poly(α-L-guluronate) lyase / G-specific alginate lyase (EC 4.2.2.11);Endo-β-1,4-glucuronan lyase (EC 4.2.2.14);Poly(β-mannuronate) lyase / M-specific alginate lyase (EC 4.2.2.3);
GH51_2	268	212	216	686	640	916	810	1014	1074	856	804	1176	628	250	280	280	200	264	14	40	30	34	40	38	380	342	316	540	494	620	120	84	62	84	116	60	232	886.222	317	32.6667	448.667	87.6667	13988	0.000415336	GH51's subfamily
GH13_29	14	28	10	6	10	8	2	6	4	4	6	2	44	8	38	16	18	8	10	10	4	26	18	14	30	36	32	8	10	8	46	32	52	100	212	72	17.3333	5.33333	22	13.6667	20.6667	85.6667	952	2.82671e-05	GH13's subfamily
GH135	2	0	10	24	12	20	52	50	36	42	62	24	16	14	14	16	42	14	30	20	18	66	10	4	50	70	44	36	20	56	80	80	80	86	108	78	4	35.7778	19.3333	24.6667	46	85.3333	1386	4.11536e-05	[retaining] endo-α-1,4-N-acetylgalactosaminidase (EC 3.2.1.- );
GT32	56	54	68	176	166	118	136	172	92	142	212	104	154	86	104	74	136	78	40	46	26	48	62	62	152	152	112	100	94	200	74	52	90	56	116	120	59.3333	146.444	105.333	47.3333	135	84.6667	3730	0.000110752	GDP-Man: α-1,3-mannosyltransferase (EC 2.4.1.-);GDP-Man: α-1,6-mannosyltransferase (EC 2.4.1.-);GDP-Man: inositol-phosphorylceramide α-mannosyltransferase (EC 2.4.1.-);Hexosyltransferases (EC 2.4.1.-);UDP-Gal: β-galactoside α-1,4-galactosyltransferase (EC 2.4.1.-);UDP-Glc: protein α-glucosyltransferase (EC 2.4.1.-);[retaining] UDP-GlcNAc: inositol-phosphorylceramide α-1,2-N-acetylglucosaminyltran…
GH66	50	66	48	186	174	290	284	266	384	314	332	352	228	222	134	242	208	286	32	30	58	8	22	50	104	76	72	142	120	120	64	82	66	106	86	96	54.6667	286.889	220	33.3333	105.667	83.3333	5400	0.000160339	Dextran dextrinase (EC 2.4.1.2);Cycloisomaltooligosaccharide glucanotransferase (EC 2.4.1.248);Dextranase (EC 3.2.1.11);
GT12	82	54	42	86	76	82	94	98	78	112	110	68	236	160	104	352	266	218	68	54	64	106	64	70	142	96	72	82	94	150	60	64	68	112	106	90	59.3333	89.3333	222.667	71	106	83.3333	3880	0.000115206	UDP-GalNAc: (N-acetylneuraminyl)-galactosylglucosylceramide N-acetylgalactosaminyltransferase (EC 2.4.1.92);
GH8	40	134	18	236	238	358	316	310	308	334	342	340	254	238	210	174	158	232	160	104	130	82	112	78	168	126	110	128	116	178	104	78	78	62	80	96	64	309.111	211	111	137.667	83	6230	0.000184983	Chitosanase (EC 3.2.1.132);[inverting] oligosaccharide reducing-end xylanase (EC 3.2.1.156);Endo-β-1,3-xylanase (EC 3.2.1.32);Endo-β-1,4-glucanase (EC 3.2.1.4);Endo-β-1,3(4)-glucanase / lichenase-laminarinase (EC 3.2.1.6);Lichenase / endo-β-1,3-1,4-glucanase (EC 3.2.1.73);Endo-β-1,4-xylanase (EC 3.2.1.8);
GH89	42	40	22	120	70	130	148	146	204	164	164	140	138	118	122	102	294	60	46	48	50	60	50	30	108	70	82	138	108	142	94	86	86	80	82	70	34.6667	142.889	139	47.3333	108	83	3654	0.000108496	α-N-acetylglucosaminidase (EC 3.2.1.50);
GH43_29	24	72	70	332	302	512	502	588	656	358	426	540	458	188	290	302	220	228	64	86	80	88	54	62	486	458	484	620	574	596	92	76	108	90	70	60	55.3333	468.444	281	72.3333	536.333	82.6667	10216	0.000303337	GH43's subfamily
GH16_24	62	80	72	394	354	490	420	526	526	458	456	446	366	256	206	190	104	252	54	38	90	18	82	76	164	128	128	86	102	132	60	62	70	100	92	102	71.3333	452.222	229	59.6667	123.333	81	7242	0.000215032	GH16's subfamily
GT23	102	64	90	180	132	198	170	276	148	220	214	214	82	70	66	88	116	64	64	58	94	58	74	84	84	60	52	64	60	96	122	78	88	72	60	66	85.3333	194.667	81	72	69.3333	81	3828	0.000113662	Hexosyltransferases (EC 2.4.1.-);Chitin-oligosaccharide α-1,6-L-fucosyltransferase (EC 2.4.1.-);Glycoprotein 6-α-L-fucosyltransferase (EC 2.4.1.68);
PL10	74	80	62	232	178	252	202	298	190	204	202	208	190	178	122	150	178	134	88	72	86	86	110	84	96	148	118	128	142	164	68	74	74	82	90	94	72	218.444	158.667	87.6667	132.667	80.3333	4938	0.000146621	Pectate lyase (EC 4.2.2.2);
GH5_1	66	88	62	404	418	450	408	454	326	394	428	366	190	174	112	178	82	188	46	48	78	120	72	56	22	28	12	168	124	120	66	94	56	70	118	64	72	405.333	154	70	79	78	6150	0.000182608	GH5's subfamily
PL40	70	182	44	10	8	20	32	48	26	24	16	50	58	74	82	120	216	136	64	54	68	40	50	20	116	110	92	348	188	270	68	96	80	78	52	76	98.6667	26	114.333	49.3333	187.333	75	3086	9.16306e-05	Ulvan lyase (EC 4.2.2.-);
GH22	2	0	4	2	0	16	6	4	2	0	2	4	6	8	0	2	6	8	54	42	118	106	34	30	34	30	52	30	60	70	78	60	96	52	82	76	2	4	5	64	46	74	1176	3.49182e-05	Lysozyme (EC 3.2.1.17);
GH43_3	36	52	32	114	92	174	122	160	130	116	126	154	140	108	96	104	74	114	102	80	110	62	38	32	30	16	40	12	32	36	84	52	70	72	64	96	40	132	106	70.6667	27.6667	73	2972	8.82456e-05	GH43's subfamily
GH170	8	10	2	0	0	0	0	0	0	0	0	4	4	0	0	2	0	6	0	0	0	0	0	18	6	8	0	0	2	4	16	14	6	42	314	40	6.66667	0.444444	2	3	3.33333	72	506	1.50243e-05	6-phospho- N-acetylmuramidase (EC 3.2.1.-);
GH174	18	32	6	16	8	18	46	4	22	20	16	16	40	36	32	40	44	26	20	20	34	14	6	14	28	16	30	22	20	36	62	70	88	74	62	70	18.6667	18.4444	36.3333	18	25.3333	71	1126	3.34336e-05	Fucoidan (Ib) endo-α-1,3-L-fucosidase (EC 3.2.1.-);
GT33	72	54	80	230	206	146	198	206	160	258	224	180	162	130	88	180	276	138	70	52	84	68	60	52	126	134	118	116	118	142	66	80	66	70	62	82	68.6667	200.889	162.333	64.3333	125.667	71	4554	0.000135219	GDP-Man: chitobiosyldiphosphodolichol β-1,4-mannosyltransferase (EC 2.4.1.142);
PL2	26	16	34	88	76	138	108	128	98	126	134	154	44	86	56	46	66	50	52	44	64	62	20	30	66	60	32	98	90	126	92	98	84	44	38	60	25.3333	116.667	58	45.3333	78.6667	69.3333	2634	7.82096e-05	Pectate lyase (EC 4.2.2.2);Exo-polygalacturonate lyase (EC 4.2.2.9);
GT7	62	58	52	142	150	168	138	228	138	304	214	230	166	130	84	102	124	106	50	48	94	106	112	90	130	132	144	78	154	156	60	80	66	42	58	96	57.3333	190.222	118.667	83.3333	132.333	67	4292	0.00012744	N-acetylgalactosaminyltransferase (EC 2.4.1.-);UDP-GalNAc: β-1,4-N-acetylgalactosaminyltransferase (EC 2.4.1.-);UDP-GlcNAc: N-acetylglucosamine-β-1,4-N-acetylglucosaminyltransferase (EC 2.4.1.-);β-1,4-N-acetylgalactosaminyltransferase (EC 2.4.1.-);UDP-Gal: xylosylprotein β-1,4-galactosyltransferase (EC 2.4.1.133);UDP-GalNAc: β-1,3-glucuronyl-galactosylproteoglycan β-1,4-N-acetylgalactosaminyltran…
GH31_19	118	86	94	80	72	82	116	178	126	128	132	120	100	122	118	76	184	78	92	68	84	80	58	48	126	140	120	242	168	262	68	58	52	82	86	54	99.3333	114.889	113	71.6667	176.333	66.6667	3898	0.000115741	GH31's subfamily
PL25	62	66	36	28	26	40	46	34	26	42	32	56	176	82	68	46	58	56	106	84	110	134	48	30	126	92	120	170	118	204	56	72	76	50	80	66	54.6667	36.6667	81	85.3333	138.333	66.6667	2722	8.08225e-05	Ulvan lyase (EC 4.2.2.-);
GT61	26	28	38	194	160	188	188	204	182	200	212	152	138	142	72	78	64	52	76	76	58	174	68	52	56	58	84	56	80	124	100	46	38	64	96	52	30.6667	186.667	91	84	76.3333	66	3676	0.000109149	UDP-Xyl: xylan arabinosyl 2-O-xylosyltransferase (EC 2.4.1.-);UDP-Xyl: xylan β-1,2-O-xylosyltransferase (EC 2.4.1.-);UDP-GlcNAc: protein O-β-N-acetylglucosaminyltransferase (EC 2.4.1.255);Protein O-mannose β-1,4-N-acetylglucosaminyltransferase (EC 2.4.1.312);UDP-Xyl: xylan β-1,4-xylosyltransferase (EC 2.4.2.-);Xylan α-1,3-L-arabinofuranosyltransferase (EC 2.4.2.-);UDP-Xyl: glycoprotein β-1,2-xylo…
GH31_7	14	8	16	32	40	46	28	62	46	28	46	64	134	100	70	114	96	126	40	46	48	68	10	28	98	106	76	40	44	48	84	50	44	70	90	52	12.6667	43.5556	106.667	40	68.6667	65	2112	6.27102e-05	GH31's subfamily
PL20	4	18	18	72	32	68	50	54	74	32	50	46	40	44	54	40	40	34	70	32	56	82	94	70	66	36	56	50	132	122	60	62	50	92	70	52	13.3333	53.1111	42	67.3333	77	64.3333	2022	6.00379e-05	Endo-β-1,4-glucuronan lyase (EC 4.2.2.14);
SLH	88	92	72	222	152	226	242	226	274	142	176	174	208	128	98	174	172	136	100	88	84	222	176	216	144	146	166	186	180	280	58	72	48	70	84	54	84	203.778	152.667	147.667	183.667	64.3333	5376	0.000159626	-
PL9_1	106	98	94	290	284	468	350	478	402	290	310	486	286	144	150	258	346	348	98	100	126	140	104	88	416	374	304	680	426	648	52	56	64	76	66	64	99.3333	373.111	255.333	109.333	474.667	63	9070	0.00026931	PL9's subfamily
GH51_13	26	48	44	176	160	206	174	250	202	206	196	196	182	132	86	32	78	78	20	18	16	40	20	8	100	72	74	48	36	114	52	32	56	78	68	88	39.3333	196.222	98	20.3333	74	62.3333	3412	0.00010131	GH51's subfamily
CBM2	60	126	36	398	496	500	424	518	446	232	244	356	156	86	88	106	154	178	94	106	62	382	154	124	120	122	110	112	106	166	62	64	68	64	66	44	74	401.556	128	153.667	122.667	61.3333	6630	0.00019686	Modules of approx. 100 residues and which are found in a large number of bacterial enzymes. The cellulose-binding function has been demonstrated in many cases. Several of these modules have been shown to also bind chitin or xylan.
GH43_11	72	106	94	126	104	148	130	180	108	100	104	144	180	78	84	124	134	84	116	110	158	274	192	104	322	342	398	362	398	374	84	56	100	38	32	58	90.6667	127.111	114	159	366	61.3333	5618	0.000166812	GH43's subfamily
GH75	16	50	30	56	58	46	76	90	114	86	56	74	48	30	98	16	2	16	34	22	26	8	18	20	16	20	20	18	54	40	42	44	52	64	100	64	32	72.8889	35	21.3333	28	61	1624	4.82204e-05	Chitosanase (EC 3.2.1.132);
GH13_35	2	14	8	14	14	10	6	8	26	12	12	8	62	30	34	20	14	10	26	40	46	44	26	32	34	30	42	30	42	32	50	42	68	68	52	72	8	12.2222	28.3333	35.6667	35	58.6667	1080	3.20677e-05	GH13's subfamily
GH16_7	22	14	16	52	68	74	34	94	62	38	72	50	26	32	48	40	18	16	30	18	18	52	22	6	44	70	72	50	64	124	40	52	40	64	94	62	17.3333	60.4444	30	24.3333	70.6667	58.6667	1698	5.04176e-05	GH16's subfamily
AA3_4	94	86	76	480	446	462	496	614	380	518	544	532	176	118	66	50	36	106	58	56	92	68	66	64	108	108	106	140	164	134	52	54	62	50	66	66	85.3333	496.889	92	67.3333	126.667	58.3333	6794	0.00020173	AA3's subfamily
GT2_Glyco_tranf_2_5	126	42	58	54	28	58	42	96	44	50	42	90	80	42	38	14	56	50	28	18	26	62	28	14	36	34	46	18	32	54	62	50	50	70	72	46	75.3333	56	46.6667	29.3333	36.6667	58.3333	1756	5.21397e-05	GT2's subfamily
CBM70	42	34	26	102	98	112	100	124	98	212	178	164	90	80	78	112	124	138	50	44	74	42	34	20	138	126	174	310	132	344	62	92	68	34	38	54	34	132	103.667	44	204	58	3748	0.000111287	The hyaluronan-specific binding function of the N-terminal CBM70 module of Streptococcus pneumoniae hyaluronate lyase has been demonstrated.
CBM30	36	46	28	34	28	14	28	16	28	24	20	22	40	42	48	66	98	40	88	74	98	74	54	70	140	166	116	114	176	242	42	70	42	50	58	82	36.6667	23.7778	55.6667	76.3333	159	57.3333	2414	7.16773e-05	Binding to cellulose has been demonstrated for the N-terminal module of Fibrobacter succinogenes CelF.
PL15_1	2	0	0	2	2	4	12	2	24	8	4	4	8	2	0	2	0	2	18	4	4	20	6	10	2	0	2	6	10	10	32	52	58	54	66	78	0.666667	6.88889	2.33333	10.3333	5	56.6667	510	1.51431e-05	PL15's subfamily
CBM26	20	8	4	12	4	12	12	10	6	4	0	4	2	2	10	0	0	0	6	6	6	0	4	0	36	38	42	18	10	18	56	48	50	50	62	60	10.6667	7.11111	2.33333	3.66667	27	54.3333	620	1.84093e-05	Starch-binding function demonstrated in two cases.
GH19	22	28	28	34	38	44	64	66	20	62	36	52	62	54	46	74	88	94	20	158	40	80	76	60	28	28	24	40	86	84	24	30	46	54	102	54	26	46.2222	69.6667	72.3333	48.3333	51.6667	1946	5.77813e-05	Chitinase (EC 3.2.1.14);Lysozyme (EC 3.2.1.17);[reducing end] exo-chitinase (EC 3.2.1.201);
GH5_26	136	96	82	92	68	58	72	72	88	80	104	84	188	154	108	226	324	194	80	52	68	50	98	26	600	650	576	524	632	646	34	62	38	52	52	68	104.667	79.7778	199	62.3333	604.667	51	6534	0.00019401	GH5's subfamily
GT78	444	172	322	86	70	86	96	82	102	92	106	48	118	62	70	86	28	14	22	26	12	26	62	8	12	14	14	2	24	18	58	42	34	56	52	64	312.667	85.3333	63	26	14	51	2630	7.80909e-05	Mannosyl-3-phosphoglycerate synthase / [retaining] GDP-Man: 3-phosphoglycerate α-mannosyltransferase (EC 2.4.1.217);
GH47	134	64	92	48	30	64	74	74	74	94	102	62	88	28	40	76	164	110	26	58	66	60	78	20	112	102	146	412	212	326	78	72	34	34	44	38	96.6667	69.1111	84.3333	51.3333	218.333	50	3336	9.90536e-05	Mannosyl-oligosaccharide α-1,2-mannosidase (EC 3.2.1.113);
GH51_4	8	48	4	16	34	42	58	56	48	66	34	58	58	62	34	22	16	14	14	12	24	22	8	4	44	28	34	20	28	42	44	42	36	64	56	50	20	45.7778	34.3333	14	32.6667	48.6667	1250	3.71154e-05	GH51's subfamily
GH173	82	102	42	174	150	180	144	212	218	220	214	248	98	130	70	58	94	102	20	28	34	12	18	6	182	144	136	184	120	186	72	44	42	62	46	22	75.3333	195.556	92	19.6667	158.667	48	3896	0.000115681	β-galactosidase (EC 3.2.1.23);
GH43_24	120	142	72	172	244	426	282	324	420	308	314	508	192	144	104	176	194	160	48	70	44	62	18	28	158	114	124	336	144	364	50	46	64	60	46	20	111.333	333.111	161.667	45	206.667	47.6667	6098	0.000181064	GH43's subfamily
GH5_45	12	4	0	0	0	0	0	0	2	0	0	0	10	12	6	36	32	14	0	0	2	0	0	2	2	0	4	0	0	2	46	32	50	64	60	32	5.33333	0.222222	18.3333	0.666667	1.33333	47.3333	424	1.25896e-05	GH5's subfamily
GT60	78	28	72	368	282	314	370	416	272	478	394	316	156	100	46	108	188	78	22	18	20	18	104	94	18	32	44	16	20	14	40	44	56	36	48	58	59.3333	356.667	112.667	46	24	47	4766	0.000141514	[retaining] UDP-GlcNAc: hydroxyproline polypeptide α-N-acetylglucosaminyltransferase (EC 2.4.1.-);[retaining] UDP-GlcNAc: polypeptide α-N-acetylglucosaminyltransferase (EC 2.4.1.-);
GH13_44	18	22	28	72	62	110	104	92	98	40	72	74	122	58	64	172	96	154	38	30	26	14	32	10	164	110	130	222	178	310	32	36	46	78	66	22	22.6667	80.4444	111	25	185.667	46.6667	3002	8.91364e-05	GH13's subfamily
PL27	72	64	42	76	70	82	82	150	126	86	92	162	154	46	62	164	130	56	20	28	14	22	2	8	92	68	68	182	140	116	48	42	40	38	52	58	59.3333	102.889	102	15.6667	111	46.3333	2754	8.17727e-05	L-rhamnose-α-1,4-D-glucuronate lyase (EC 4.2.2.28);
GH59	24	18	14	110	88	114	92	140	64	146	88	80	202	156	150	172	292	110	28	44	34	50	18	38	28	18	12	28	34	42	48	36	64	40	42	42	18.6667	102.444	180.333	35.3333	27	45.3333	2706	8.03475e-05	β-galactosylceramidase (EC 3.2.1.46);
GH5_39	62	54	66	98	102	76	144	160	74	126	142	158	70	72	36	62	66	82	20	26	24	32	30	16	144	136	142	102	146	184	72	34	64	32	32	34	60.6667	120	64.6667	24.6667	142.333	44.6667	2920	8.67016e-05	GH5's subfamily
GH49	2	24	6	32	56	114	98	84	80	48	38	130	78	70	82	40	98	140	42	28	32	42	14	12	44	50	32	104	68	138	64	50	42	44	36	22	10.6667	75.5556	84.6667	28.3333	72.6667	43	2084	6.18788e-05	Chaetomorphan endo-β-1,4-(3-sulfo)-arabinanase (EC 3.2.1.-);Panose α-1,4-glucosidase (EC 3.2.1.-);Dextranase (EC 3.2.1.11);Isopullulanase (EC 3.2.1.57);[inverting] dextran α-1,6-isomaltotriosidase (EC 3.2.1.95);
GH31_14	92	54	48	8	14	16	8	4	14	14	12	18	40	54	46	42	90	52	12	12	10	44	6	10	34	18	16	80	80	108	42	44	58	36	30	36	64.6667	12	54	15.6667	56	41	1302	3.86594e-05	GH31's subfamily
GT113	62	108	68	24	52	64	50	46	72	40	48	52	42	22	34	96	186	44	96	92	56	64	44	26	50	64	50	158	100	198	30	32	30	58	58	38	79.3333	49.7778	70.6667	63	103.333	41	2354	6.98958e-05	Hexosyltransferases (EC 2.4.1.-);[inverting] UDP-Galf: [LPS/O-antigen] α-glucoside β-1,6-galactofuranosyltransferase (EC 2.4.1.-);
GT62	54	32	26	130	142	152	176	212	118	186	162	220	48	46	52	54	174	60	16	40	44	58	34	48	152	160	186	126	98	132	38	28	40	42	50	48	37.3333	166.444	72.3333	40	142.333	41	3384	0.000100479	[retaining] GDP-Man: [α-core-mannan] α-1,6-mannosyltransferase (EC 2.4.1.-);α-1,2-mannosyltransferase (EC 2.4.1.-);GDP-Man: Man2GlcNAc2-PP-dolichol α-1,6-mannosyltransferase (EC 2.4.1.257);
GH43_9	24	8	20	58	102	140	88	124	176	66	56	132	90	60	70	76	174	70	42	38	54	34	42	40	232	270	304	254	372	326	38	40	38	48	48	26	17.3333	104.667	90	41.6667	293	39.6667	3780	0.000112237	GH43's subfamily
GH5_41	64	56	28	166	168	144	168	238	156	204	244	164	40	64	60	78	52	78	52	40	52	14	40	26	226	304	324	322	296	352	34	30	42	54	36	36	49.3333	183.556	62	37.3333	304	38.6667	4452	0.00013219	GH5's subfamily
GH43_33	26	12	26	52	52	68	70	62	76	30	76	46	70	68	48	66	44	46	28	44	18	26	20	6	32	52	52	48	48	70	38	34	40	30	34	48	21.3333	59.1111	57	23.6667	50.3333	37.3333	1606	4.76859e-05	GH43's subfamily
GH43_2	68	68	54	54	70	100	58	88	122	60	60	102	132	70	84	184	348	88	16	12	22	24	38	6	308	428	346	356	394	450	54	30	26	34	32	46	63.3333	79.3333	151	19.6667	380.333	37	4432	0.000131596	GH43's subfamily
GH5_38	88	64	66	24	18	30	44	44	54	40	48	54	78	50	48	54	148	56	36	52	72	60	52	74	332	338	342	372	464	534	28	54	40	30	38	28	72.6667	39.5556	72.3333	57.6667	397	36.3333	3954	0.000117404	GH5's subfamily
PL32	200	226	208	22	26	62	60	64	96	54	28	98	234	134	110	346	762	264	20	44	22	100	30	12	256	226	292	466	476	456	52	26	36	28	30	28	211.333	56.6667	308.333	38	362	33.3333	5594	0.000166099	Poly(β-mannuronate) lyase / M-specific alginate lyase (EC 4.2.2.3);
PL5	134	50	50	132	102	84	80	70	42	62	44	68	84	98	30	40	28	54	64	50	64	308	116	78	42	32	32	40	74	56	38	38	30	32	38	24	78	76	55.6667	113.333	46	33.3333	2408	7.14992e-05	Endo-β-1,4-glucuronan lyase (EC 4.2.2.14);Poly(β-mannuronate) lyase / M-specific alginate lyase (EC 4.2.2.3);
GH107	24	14	6	12	12	26	14	30	14	14	48	12	34	26	14	48	60	34	20	24	24	58	14	18	28	28	24	50	30	70	44	32	18	40	38	26	14.6667	20.2222	36	26.3333	38.3333	33	1028	3.05237e-05	Endo-α-1,3-L-fucanase (EC 3.2.1.211);Endo-α-1,4-L-fucanase (EC 3.2.1.212);
GT71	10	6	22	116	70	100	122	156	76	118	110	94	98	54	28	36	52	34	16	12	6	8	18	36	16	20	2	16	16	6	32	24	38	42	38	24	12.6667	106.889	50.3333	16	12.6667	33	1672	4.96456e-05	α-mannosyltransferase (EC 2.4.1.-);
GH5_55	26	30	34	20	50	56	26	82	34	26	20	50	24	20	20	24	44	40	12	14	6	84	12	56	78	64	68	240	134	180	30	24	30	40	46	24	30	40.4444	28.6667	30.6667	127.333	32.3333	1768	5.24961e-05	GH5's subfamily
GT104	178	158	138	36	44	48	32	48	22	20	12	30	126	78	28	182	220	82	0	0	0	0	0	0	0	0	0	8	0	8	24	40	48	34	24	22	158	32.4444	119.333	0	2.66667	32	1690	5.01801e-05	DTDP-L-Rha: α-L-rhamnosyltransferase (EC 2.4.1.-);
CBM60	8	4	4	94	64	62	68	68	68	22	54	38	48	36	10	12	18	16	2	12	14	6	2	4	10	6	10	8	24	22	38	30	28	36	30	24	5.33333	59.7778	23.3333	6.66667	13.3333	31	1000	2.96923e-05	Modules of approx 120 residues usually found appended to xylanases. The xylan-binding function and the relatedness (circular permutation) to family CBM36 has been demonstrated [PMID: 20659893].
GH5_22	56	60	84	64	74	82	96	108	100	176	130	116	104	58	34	78	68	52	18	34	26	8	38	30	172	134	146	170	102	208	30	22	38	44	30	22	66.6667	105.111	65.6667	25.6667	155.333	31	2812	8.34949e-05	GH5's subfamily
PL17	8	58	12	30	36	10	44	54	22	42	20	46	36	26	26	36	68	42	22	26	50	20	26	18	74	48	32	150	88	128	30	28	28	28	32	38	26	33.7778	39	27	86.6667	30.6667	1482	4.4004e-05	Alginate lyase (EC 4.2.2.-);Oligomannuronate lyase / exo-acting mannuronan lyase (EC 4.2.2.-);Hyaluronate lyase (EC 4.2.2.1);Poly(α-L-guluronate) lyase / G-specific alginate lyase (EC 4.2.2.11);Oligoalginate lyase / exo-alginate lyase (EC 4.2.2.26);Poly(β-mannuronate) lyase / M-specific alginate lyase (EC 4.2.2.3);
GH5_5	4	14	4	130	118	180	162	190	134	188	216	182	82	44	82	118	68	84	66	50	44	74	70	46	100	96	58	186	348	198	24	28	30	42	18	38	7.33333	166.667	79.6667	58.3333	164.333	30	3516	0.000104398	GH5's subfamily
GH13_7	50	38	28	64	110	100	84	98	108	56	72	108	118	88	74	120	56	122	14	2	0	56	12	6	2	0	2	30	2	26	30	32	48	22	6	40	38.6667	88.8889	96.3333	15	10.3333	29.6667	1824	5.41588e-05	GH13's subfamily
GH130_5	56	100	64	28	18	26	38	64	36	42	44	64	66	32	44	88	98	38	18	16	48	8	18	2	88	70	74	154	136	150	24	40	40	20	34	20	73.3333	40	61	18.3333	112	29.6667	1906	5.65936e-05	GH130's subfamily
GT75	34	64	16	112	114	124	114	180	88	126	120	124	60	32	32	40	122	54	68	38	54	40	62	44	78	66	70	212	162	162	28	34	26	30	20	36	38	122.444	56.6667	51	125	29	2786	8.27229e-05	UDP-Glc: self-glucosylating β-glucosyltransferase (EC 2.4.1.-);NDP-pyranose mutase (EC 5.4.99.-);UDP-L-arabinopyranose mutase (EC 5.4.99.30);
GH13_24	0	0	0	4	0	2	2	2	2	4	0	0	20	6	10	24	26	26	0	6	2	6	12	0	14	4	0	4	0	12	24	24	24	36	32	30	0	1.77778	18.6667	4.33333	5.66667	28.3333	358	1.06299e-05	GH13's subfamily
GT34	28	2	10	40	4	34	36	32	30	30	34	22	24	8	16	30	22	8	6	16	12	22	20	32	20	34	18	12	24	14	26	14	26	36	54	14	13.3333	29.1111	18	18	20.3333	28.3333	810	2.40508e-05	UDP-Gal: galactoglucomannan α-1,6-galactosyltransferase (EC 2.4.1.-);α-1,2-galactosyltransferase (EC 2.4.1.-);Galactomannan α-1,6-galactosyltransferase (EC 2.4.1.-);UDP-Xyl: xyloglucan α-1,6-xylosyltransferase (EC 2.4.2.39);
GT64	0	0	0	4	0	2	2	6	12	2	2	10	4	2	6	8	42	0	0	0	0	4	6	2	4	0	2	10	12	4	24	34	24	38	30	14	0	4.44444	10.3333	2	5.33333	27.3333	310	9.20463e-06	Glucuronyl-galactosyl-proteoglycan 4-α-N-acetylglucosaminyltransferase (EC 2.4.1.223);Glucuronosyl-N-acetylglucosaminyl-proteoglycan α-1,4-N-acetylglucosaminyltransferase (EC 2.4.1.224);
GH13_1	44	48	32	22	60	48	38	24	56	38	48	28	54	88	44	14	16	66	48	22	30	26	40	32	50	28	22	156	116	134	32	30	28	20	14	38	41.3333	40.2222	47	33	84.3333	27	1634	4.85173e-05	GH13's subfamily
GH43_35	4	8	0	124	166	226	138	156	150	152	90	242	104	42	56	78	40	94	18	24	14	10	12	0	110	94	62	158	92	146	24	28	26	24	30	28	4	160.444	69	13	110.333	26.6667	2770	8.22478e-05	GH43's subfamily
GT2_Chitin_synth_2	16	18	30	42	36	30	60	48	34	32	42	22	46	20	48	16	22	50	14	32	24	8	18	2	16	16	28	8	16	20	18	24	32	20	38	28	21.3333	38.4444	33.6667	16.3333	17.3333	26.6667	974	2.89203e-05	GT2's subfamily
GH152	18	4	12	90	86	58	78	72	40	118	148	94	20	12	20	10	6	46	2	2	12	0	18	10	2	4	8	12	6	2	42	18	24	6	24	40	11.3333	87.1111	19	7.33333	5.66667	25.6667	1164	3.45619e-05	Endo-β-1,3-glucanase / laminarinase (EC 3.2.1.39);
GH85	8	16	10	30	16	14	12	4	12	8	16	12	28	22	16	26	60	6	0	14	4	0	4	2	20	6	4	82	14	80	30	20	36	38	18	10	11.3333	13.7778	26.3333	4	34.3333	25.3333	698	2.07253e-05	Mannosyl-glycoprotein endo-β-N-acetylglucosaminidase (EC 3.2.1.96);
GT40	20	38	14	66	52	68	128	76	124	94	114	92	68	68	32	32	100	54	40	34	20	48	80	44	72	106	126	56	78	92	20	38	20	18	32	24	24	90.4444	59	44.3333	88.3333	25.3333	2188	6.49668e-05	UDP-Galf: β-1,3-galactofuranosyltransferase (EC 2.4.1.-);
GH5_2	36	24	24	74	98	90	70	82	84	82	84	68	14	16	42	6	20	30	20	10	18	10	4	10	34	8	42	150	62	108	26	36	14	24	24	24	28	81.3333	21.3333	12	67.3333	24.6667	1568	4.65576e-05	GH5's subfamily
GT29	2	2	0	26	20	20	38	34	24	12	24	22	26	30	10	30	16	62	2	8	14	22	20	6	36	34	34	40	42	26	32	26	16	24	24	26	1.33333	24.4444	29	12	35.3333	24.6667	830	2.46446e-05	UDP-Gal: β-1,3-galactan β-1,6-galactosyltransferase (EC 2.4.1.-);UDP-Gal: β-1,6-galactan β-1,6-galactosyltransferase (EC 2.4.1.-);CMP-NeuAc: α-2,8-polysialyltransferase (EC 2.4.3.-);Sialyltransferase (EC 2.4.3.-);CMP-NeuAc: β-galactoside α-2,6-sialyltransferase (EC 2.4.3.1);CMP-Neu5Ac: α-N-acetylgalactoside α-2,6-sialyltransferase (EC 2.4.3.3);CMP-Neu5Ac: β-galactoside α-2,3-sialyltransferase (EC…
PL4_1	34	26	60	126	92	116	136	176	140	198	112	208	94	74	110	84	62	86	46	18	52	16	58	36	54	54	66	110	112	152	24	38	40	12	16	14	40	144.889	85	37.6667	91.3333	24	2852	8.46826e-05	PL4's subfamily
AA3_3	36	14	20	22	36	46	32	38	32	42	78	34	26	24	18	28	34	40	18	8	20	36	8	18	40	38	44	28	20	56	16	30	24	16	22	34	23.3333	40	28.3333	18	37.6667	23.6667	1076	3.1949e-05	AA3's subfamily
GH5_10	48	46	48	60	76	126	120	108	136	66	82	50	52	30	48	34	130	32	10	4	14	0	10	6	102	72	88	294	120	288	28	26	8	22	34	24	47.3333	91.5556	54.3333	7.33333	160.667	23.6667	2442	7.25087e-05	GH5's subfamily
GT77	14	12	14	138	142	118	158	226	110	168	100	132	62	46	24	42	76	44	14	6	12	28	54	26	42	28	48	18	20	38	18	20	22	42	10	30	13.3333	143.556	49	23.3333	32.3333	23.6667	2102	6.24133e-05	Fucosylgalactoside 3-α-galactosyltransferase (EC 2.4.1.37);α-1,3-xylosyltransferase (EC 2.4.2.-);β-L-arabinofuranosyltransferase (EC 2.4.2.-);
PL33_2	16	10	8	30	16	26	40	28	72	50	30	34	12	38	38	10	28	20	16	14	14	46	8	8	50	60	30	40	58	58	18	26	40	14	24	18	11.3333	36.2222	24.3333	17.6667	49.3333	23.3333	1048	3.11176e-05	PL33's subfamily
GH13_37	8	0	0	62	22	32	36	48	22	38	72	36	20	12	8	0	8	12	22	28	36	92	16	24	60	56	56	70	96	58	24	16	22	18	38	14	2.66667	40.8889	10	36.3333	66	22	1182	3.50963e-05	GH13's subfamily
GH51_5	26	16	10	0	2	2	2	0	4	2	0	2	74	42	66	96	208	70	0	0	0	44	6	6	100	92	110	72	104	96	24	12	16	24	34	20	17.3333	1.55556	92.6667	9.33333	95.6667	21.6667	1382	4.10348e-05	GH51's subfamily
GT56	40	40	20	2	8	12	6	32	26	8	0	28	2	0	2	0	4	2	0	0	10	26	0	6	58	48	54	130	82	106	20	8	36	22	22	22	33.3333	13.5556	1.66667	7	79.6667	21.6667	882	2.61886e-05	TDP-Fuc4NAc: lipid II Fuc4NAc transferase (EC 2.4.1.-);
PL33	18	20	20	16	4	22	34	12	32	16	52	26	54	28	14	34	80	26	8	10	18	10	2	0	10	12	10	62	56	30	36	20	18	18	16	22	19.3333	23.7778	39.3333	8	30	21.6667	866	2.57136e-05	Hyaluronate lyase (EC 4.2.2.1);Chondroitin-sulfate ABC endolyase (EC 4.2.2.20);Gellan lyase (EC 4.2.2.25);Chondroitin AC lyase (EC 4.2.2.5);
CBM21	4	16	8	22	14	16	18	48	26	14	28	20	22	20	10	2	10	14	0	0	4	8	2	0	12	8	6	84	18	50	32	30	10	10	22	24	9.33333	22.8889	13	2.33333	29.6667	21.3333	632	1.87656e-05	Modules of approx. 100 residues. The granular starch-binding function has been demonstrated in one case. Sometimes designated as starch-binding domains (SBD).
CBM85	12	14	8	8	16	8	26	14	26	6	20	2	54	46	12	56	58	32	42	46	58	98	22	46	36	38	36	60	108	74	16	26	22	22	10	26	11.3333	14	43	52	58.6667	20.3333	1204	3.57496e-05	-
PL21	26	42	26	4	0	10	4	4	8	14	6	18	0	20	6	2	4	8	0	6	2	2	0	0	14	18	16	36	22	30	20	26	4	42	14	16	31.3333	7.55556	6.66667	1.66667	22.6667	20.3333	470	1.39554e-05	Acharan-sulfate lyase (EC 4.2.2.-);Heparin lyase / heparin lyase I (EC 4.2.2.7);Heparin-sulfate lyase / heparin lyase III (EC 4.2.2.8);
GH68_2	4	0	2	20	36	40	50	52	58	40	36	34	52	34	16	114	98	80	10	8	2	54	6	0	14	16	14	26	36	18	4	12	8	16	48	26	2	40.6667	65.6667	13.3333	20.6667	19	1084	3.21865e-05	GH68's subfamily
GH82	10	8	0	4	8	10	18	14	20	24	16	26	14	0	8	10	10	0	4	14	24	4	8	14	18	42	28	10	28	10	28	20	18	16	16	16	6	15.5556	7	11.3333	22.6667	19	518	1.53806e-05	螜-carrageenase (EC 3.2.1.157);
PL12_1	4	4	14	4	0	0	6	2	4	0	0	0	0	0	0	2	0	8	2	0	2	0	4	6	8	2	2	2	0	2	16	18	14	36	24	6	7.33333	1.77778	1.66667	2.33333	2.66667	19	192	5.70093e-06	PL12's subfamily
GH16_1	2	0	6	0	0	0	0	0	2	0	0	0	22	8	24	12	126	12	0	0	0	0	2	0	10	4	4	6	4	12	20	18	20	20	16	18	2.66667	0.222222	34	0.333333	6.66667	18.6667	368	1.09268e-05	GH16's subfamily
GH30_2	58	36	56	234	196	308	292	346	410	270	394	462	288	80	148	180	118	104	28	22	46	18	68	56	496	568	592	520	554	758	26	16	18	20	14	18	50	323.556	153	39.6667	581.333	18.6667	7818	0.000232135	GH30's subfamily
GH46	10	0	0	48	36	20	30	34	62	46	30	34	36	42	40	26	20	8	8	0	0	0	10	6	2	0	0	18	0	2	18	14	18	26	12	22	3.33333	37.7778	28.6667	4	3.66667	18.3333	678	2.01314e-05	Chitosanase (EC 3.2.1.132);
GH5_53	0	34	0	100	158	216	202	196	176	146	132	216	18	22	6	26	42	96	6	0	2	2	4	0	18	12	20	80	50	70	26	16	20	12	20	16	11.3333	171.333	35	2.33333	41.6667	18.3333	2160	6.41355e-05	GH5's subfamily
GT45	2	4	2	20	28	36	48	62	12	32	56	28	44	32	26	18	64	2	20	22	22	38	46	30	2	0	4	46	32	16	14	16	18	6	32	22	2.66667	35.7778	31	29.6667	16.6667	18	902	2.67825e-05	UDP-GlcNAc: α-N-acetylglucosaminyltransferase (EC 2.4.1.-);Glucuronosyl-N-acetylglucosaminyl-proteoglycan α-1,4-N-acetylglucosaminyltransferase (EC 2.4.1.224);
CBM87	50	10	28	0	4	0	0	4	0	2	0	2	2	2	2	0	2	20	4	4	0	10	0	0	0	0	0	16	10	8	32	4	14	20	16	20	29.3333	1.33333	4.66667	3	5.66667	17.6667	286	8.49201e-06	Binding to α-1,4-N-acetylgalactosamine-rich regions of galactosaminogalactan
GH5_48	20	28	26	80	58	78	96	106	116	154	142	90	74	44	50	26	58	40	30	32	24	38	14	10	80	82	74	40	58	78	6	36	20	16	14	14	24.6667	102.222	48.6667	24.6667	68.6667	17.6667	1952	5.79594e-05	GH5's subfamily
PL4_5	16	14	4	8	0	10	2	26	4	8	12	18	6	16	8	22	8	18	0	0	0	0	0	2	2	0	4	2	4	8	26	4	8	30	22	16	11.3333	9.77778	13	0.333333	3.33333	17.6667	328	9.73909e-06	PL4's subfamily
GH30_8	10	10	24	22	32	30	30	66	40	16	14	38	10	8	2	16	0	66	44	26	16	30	24	26	116	132	126	234	178	196	38	8	26	4	12	14	14.6667	32	17	27.6667	163.667	17	1684	5.00019e-05	GH30's subfamily
GT99	44	22	34	24	16	40	68	32	50	60	62	52	46	6	22	12	34	10	2	0	16	2	6	6	6	10	18	40	18	24	22	22	8	18	2	30	33.3333	44.8889	21.6667	5.33333	19.3333	17	884	2.6248e-05	[retaining] CMP-β-KDO: 3-deoxy-β-D-manno-oct-2-ulosonic acid transferase (EC 2.4.3.-);
PL34	0	22	0	20	34	14	22	14	16	12	6	14	14	16	14	50	4	60	0	0	0	0	0	0	14	2	0	174	32	126	26	8	24	20	6	16	7.33333	16.8889	26.3333	0	58	16.6667	780	2.316e-05	Alginate lyase (EC 4.2.2.-);
CBM5	10	6	14	18	32	20	32	18	30	12	12	24	30	6	16	8	12	12	6	2	4	6	8	2	22	46	32	28	42	8	10	14	18	10	26	20	10	22	14	4.66667	29.6667	16.3333	616	1.82905e-05	Modules of approx. 60 residues found in bacterial enzymes. Chitin-binding described in several cases. Distantly related to the CBM12 family.
PL8_3	22	58	14	22	28	34	44	18	34	28	46	30	52	74	102	38	96	42	22	8	38	30	18	10	128	206	188	222	156	216	10	22	18	24	14	10	31.3333	31.5556	67.3333	21	186	16.3333	2122	6.30071e-05	PL8's subfamily
GT90	6	10	10	224	198	214	254	276	156	252	242	238	64	54	44	28	66	62	2	0	8	22	10	30	34	14	16	174	40	82	6	16	24	22	18	10	8.66667	228.222	53	12	60	16	2926	8.68798e-05	[inverting] UDP-Glc: protein O-β-glucosyltransferase (EC 2.4.1.-);(mannosyl) glucuronoxylomannan/galactoxylomannan β-1,2-xylosyltransferase (EC 2.4.2.-);[inverting] UDP-Xyl: protein O-β-xylosyltransferase (EC 2.4.2.-);
GH43_20	20	8	22	48	36	76	62	60	102	42	48	90	26	20	22	22	14	16	8	8	8	8	4	0	10	6	2	26	14	20	10	10	18	12	16	28	16.6667	62.6667	20	6	13	15.6667	942	2.79702e-05	GH43's subfamily
GH13_15	8	2	2	6	8	10	6	8	4	4	4	8	8	2	4	6	20	0	6	4	4	16	32	10	42	76	56	16	50	32	24	20	20	8	2	18	4	6.44444	6.66667	12	45.3333	15.3333	546	1.6212e-05	GH13's subfamily
PL10_2	46	18	24	48	38	88	40	100	62	10	48	92	28	12	20	20	6	42	38	16	38	16	56	24	128	156	166	86	82	68	20	4	18	14	18	18	29.3333	58.4444	21.3333	31.3333	114.333	15.3333	1708	5.07145e-05	PL10's subfamily
PL33_1	42	30	30	18	10	42	16	20	12	22	32	32	48	30	18	34	36	34	22	14	30	20	2	4	10	32	26	140	42	56	10	14	6	14	20	28	34	22.6667	33.3333	15.3333	51	15.3333	996	2.95736e-05	PL33's subfamily
CBM63	18	14	24	66	58	68	62	74	58	60	82	70	38	66	48	34	30	58	22	10	2	36	44	14	20	2	14	50	22	60	24	8	16	22	12	6	18.6667	66.4444	45.6667	21.3333	28	14.6667	1312	3.89563e-05	The CBM63 module of Bacillus subtilis expansin EXLX1 has been shown to bind cellulose.
GH5_57	0	18	4	14	36	28	36	32	56	34	70	50	52	20	42	40	16	24	0	0	4	2	6	0	12	0	8	20	20	42	12	0	26	26	16	8	7.33333	39.5556	32.3333	2	17	14.6667	774	2.29819e-05	GH5's subfamily
GT111	84	50	46	18	0	18	14	10	24	14	8	16	36	20	38	16	22	14	0	2	10	0	0	2	0	0	0	0	0	0	22	6	10	10	26	14	60	13.5556	24.3333	2.33333	0	14.6667	550	1.63308e-05	UDP-Galf: β-1,3-galactofuranosyltransferase (EC 2.4.1.-);
AA10	8	2	8	112	140	108	94	102	60	44	46	120	40	60	32	14	16	54	20	32	36	26	6	24	10	4	28	4	38	20	16	8	18	12	12	20	6	91.7778	36	24	17.3333	14.3333	1394	4.13911e-05	Lytic xylan monooxygenase / xylan oxidase (glycosidic bond-cleaving) (EC 1.14.99.-);Lytic chitin monooxygenase (EC 1.14.99.53);Lytic cellulose monooxygenase (C1-hydroxylating) (EC 1.14.99.54);Lytic cellulose monooxygenase (C4-dehydrogenating) (EC 1.14.99.56);
GH13_27	0	0	0	2	2	20	10	16	8	2	2	2	8	2	10	4	22	12	128	84	104	86	122	76	38	34	22	40	76	62	10	14	8	24	20	10	0	7.11111	9.66667	100	45.3333	14.3333	1080	3.20677e-05	GH13's subfamily
GH112	14	20	12	10	0	12	4	4	18	10	18	16	34	26	14	10	28	4	14	22	34	36	14	10	46	34	48	96	66	90	8	24	12	22	6	12	15.3333	10.2222	19.3333	21.6667	63.3333	14	848	2.51791e-05	[inverting] β-galactoside phosphorylase (EC 2.4.1.-);β-1,3-galactosyl-N-acetylhexosamine phosphorylase (EC 2.4.1.211);[inverting] D-galactosyl-β-1,4-L-rhamnose phosphorylase (EC 2.4.1.247);
GT58	8	8	2	12	16	30	20	18	44	44	16	20	26	6	12	8	18	4	8	22	10	18	6	12	30	32	26	54	120	48	8	22	18	8	10	18	6	24.4444	12.3333	12.6667	51.6667	14	782	2.32194e-05	Dol-P-Man: Man5GlcNAc2-PP-Dol α-1,3-mannosyltransferase (EC 2.4.1.258);
GT96	8	2	16	130	120	124	112	150	112	196	142	142	52	46	28	6	8	30	8	10	18	4	30	4	14	16	20	10	12	18	12	20	10	22	18	2	8.66667	136.444	28.3333	12.3333	15	14	1672	4.96456e-05	UDP-Gal: peptidyl serine α-galactosyltransferase (EC 2.4.1.-);
CBM44	10	8	2	24	32	20	50	14	54	18	24	20	42	20	20	20	44	20	4	0	0	2	0	0	8	14	4	54	4	32	16	6	22	0	32	4	6.66667	28.4444	27.6667	1	19.3333	13.3333	644	1.91219e-05	The C-terminal CBM44 module of the Clostridium thermocellum enzyme has been demonstrated to bind equally well cellulose and xyloglucan
CE18	82	32	50	12	2	12	4	6	2	2	6	2	10	38	4	0	0	16	0	4	6	0	6	6	20	10	12	28	28	54	16	8	4	16	8	26	54.6667	5.33333	11.3333	3.66667	25.3333	13	532	1.57963e-05	N-acetylgalactosaminegalactan deacetylase (EC 3.5.1.-);
GT47	54	50	44	112	102	118	162	174	144	148	176	198	62	18	26	46	80	54	58	32	46	40	64	34	62	38	88	38	78	74	12	10	16	10	10	20	49.3333	148.222	47.6667	45.6667	63	13	2498	7.41715e-05	Glucomannan β-1,2-galactosyltransferase (EC 2.4.1.-);Pectin β-1,4-glucuronyltransferase (EC 2.4.1.-);Xyloglucan β-1,2-galactosyltransferase (EC 2.4.1.-);Xyloglucan β-1,2-galacturonyltransferase (EC 2.4.1.-);UDP-GlcA: N-acetylglucosaminyl-proteoglycan β-1,4-glucuronosyltransferase (EC 2.4.1.225);UDP-Xyl: xylan β-1,4-xylosyltransferase (EC 2.4.2.-);α-1,3-L-arabinofuranosyltransferase (EC 2.4.2.-);A…
GH43_4	4	36	10	208	230	508	310	346	436	250	230	500	156	42	46	116	84	126	46	20	32	26	68	52	254	260	240	244	260	294	2	0	0	0	70	2	16.6667	335.333	95	40.6667	258.667	12.3333	5508	0.000163545	GH43's subfamily
PL4_4	8	4	10	22	10	4	12	36	46	4	20	12	46	42	70	40	62	14	16	10	24	8	4	6	12	12	8	100	28	46	16	20	2	12	6	18	7.33333	18.4444	45.6667	11.3333	34.3333	12.3333	810	2.40508e-05	PL4's subfamily
GH31_5	0	10	0	8	10	2	10	10	24	8	2	18	12	16	14	8	6	4	6	4	6	0	0	2	26	8	30	4	26	16	12	24	8	6	10	12	3.33333	10.2222	10	3	18.3333	12	362	1.07486e-05	GH31's subfamily
GH86	18	8	0	6	2	6	8	8	2	2	16	14	8	0	4	12	24	0	56	30	44	60	26	24	82	70	60	68	106	110	16	12	14	18	8	4	8.66667	7.11111	8	40	82.6667	12	946	2.8089e-05	[retaining] β-porphyranase (EC 3.2.1.178);β-agarase (EC 3.2.1.81);
GT57	34	18	20	16	34	52	20	38	48	46	22	44	14	20	16	6	16	36	22	34	74	14	12	12	8	0	12	8	2	6	8	12	22	12	10	8	24	35.5556	18	28	6	12	776	2.30413e-05	Dolichyl-P-Glc:Glc1Man9GlcNAc2-PP-dolichol α-1,3-glucosyltransferase (EC 2.4.1.265);Dolichyl-P-Glc:Man9GlcNAc2-PP-dolichol α-1,3-glucosyltransferase (EC 2.4.1.267);
GH43_37	0	0	0	6	18	12	8	18	10	10	14	60	2	0	4	0	0	2	10	14	10	18	6	4	20	38	18	10	20	30	12	16	12	14	8	8	0	17.3333	1.33333	10.3333	22.6667	11.6667	432	1.28271e-05	GH43's subfamily
GH51_12	18	6	20	28	30	18	52	46	26	58	20	30	0	4	0	4	12	6	22	18	34	14	6	4	36	22	54	18	16	48	10	10	24	12	10	4	14.6667	34.2222	4.33333	16.3333	32.3333	11.6667	740	2.19723e-05	GH51's subfamily
GH126	0	10	2	2	4	0	0	4	0	4	0	0	2	2	0	6	18	6	14	38	22	4	12	14	16	18	10	6	2	16	0	6	2	6	46	4	4	1.55556	5.66667	17.3333	11.3333	10.6667	296	8.78893e-06	[retaining] α-amylase (EC 3.2.1.1);
GH43_19	24	10	14	76	166	218	222	206	464	166	202	408	252	56	104	122	30	110	14	12	14	10	10	4	60	78	50	200	46	156	6	22	14	4	8	8	16	236.444	112.333	10.6667	98.3333	10.3333	3566	0.000105883	GH43's subfamily
PL12_2	2	4	2	0	4	6	4	0	2	2	8	2	20	8	6	24	22	20	2	8	8	2	2	0	20	32	20	56	38	44	16	10	6	6	18	6	2.66667	3.11111	16.6667	3.66667	35	10.3333	430	1.27677e-05	PL12's subfamily
PL8_2	8	10	0	2	0	10	4	20	12	8	0	0	6	6	6	10	14	2	10	6	4	4	0	4	8	6	6	30	38	28	18	10	4	20	2	8	6	6.22222	7.33333	4.66667	19.3333	10.3333	324	9.62032e-06	PL8's subfamily
GH13_6	14	14	6	24	28	34	40	42	30	46	40	40	14	26	10	22	36	24	4	2	0	8	6	18	0	2	0	2	2	8	12	12	6	8	6	16	11.3333	36	22	6.33333	2.33333	10	602	1.78748e-05	GH13's subfamily
GH31_20	14	32	12	2	6	4	4	4	2	0	2	0	38	24	12	92	108	74	14	6	2	0	10	2	64	54	50	198	82	216	8	8	8	26	8	2	19.3333	2.66667	58	5.66667	110.667	10	1188	3.52745e-05	GH31's subfamily
GH64	2	4	10	50	38	18	22	14	12	18	42	16	2	14	14	34	58	20	14	8	10	2	8	0	8	12	14	30	32	28	6	4	6	10	18	16	5.33333	25.5556	23.6667	7	20.6667	10	614	1.82311e-05	Endo-β-1,3-glucanase / laminarinase (EC 3.2.1.39);
GT97	0	4	0	12	0	20	6	14	10	2	6	16	4	2	4	14	42	2	0	0	0	0	0	0	2	2	0	8	12	28	14	16	10	4	8	2	1.33333	9.55556	11.3333	0	8.66667	9	264	7.83878e-06	CMP-NeuAc: α-galactoside-a-(2,6)-sialyltransferase (EC 2.4.3.-);
PL21_1	6	4	4	20	14	18	22	26	2	10	12	34	20	20	14	24	26	4	4	4	0	6	0	4	18	30	10	22	22	24	0	12	8	2	12	20	4.66667	17.5556	18	3	21	9	478	1.41929e-05	PL21's subfamily
GH5_47	10	0	4	0	0	4	0	6	6	4	0	20	6	2	6	0	4	0	6	14	10	8	2	2	12	10	6	0	4	6	4	8	8	12	8	12	4.66667	4.44444	3	7	6.33333	8.66667	204	6.05724e-06	GH5's subfamily
GH51_11	6	84	10	8	2	6	4	4	14	32	20	10	0	2	2	2	6	8	20	22	48	12	22	12	38	10	10	16	32	24	10	0	6	6	12	18	33.3333	11.1111	3.33333	22.6667	21.6667	8.66667	538	1.59745e-05	GH51's subfamily
GT17	12	4	8	184	210	172	154	168	134	100	168	110	74	68	50	82	182	76	24	8	14	6	54	26	2	16	4	18	24	10	4	4	4	16	16	8	8	155.556	88.6667	22	12.3333	8.66667	2214	6.57388e-05	UDP-GlcNAc: β-1,4-mannosyl-glycoprotein β-1,4-N-acetylglucosaminyltransferase (EC 2.4.1.144);
PL6_3	8	0	14	24	18	22	28	36	44	10	28	6	18	6	10	6	10	14	6	2	12	10	10	4	58	24	22	54	38	70	12	0	18	4	14	4	7.33333	24	10.6667	7.33333	44.3333	8.66667	664	1.97157e-05	PL6's subfamily
AA5_1	0	2	8	0	10	18	28	14	16	4	18	28	16	22	0	8	10	12	46	30	70	2	26	20	30	36	56	96	52	72	12	2	14	6	12	4	3.33333	15.1111	11.3333	32.3333	57	8.33333	800	2.37539e-05	AA5's subfamily
GH5_30	0	0	0	4	4	0	2	4	2	12	0	8	0	2	2	0	0	2	6	2	10	6	8	4	26	18	36	18	14	16	6	10	6	2	18	8	0	4	1	6	21.3333	8.33333	256	7.60124e-06	GH5's subfamily
GH5_44	10	2	8	0	2	2	0	2	2	0	4	0	50	10	12	58	46	36	0	0	0	0	0	0	0	0	0	2	2	0	2	4	22	6	12	4	6.66667	1.33333	35.3333	0	0.666667	8.33333	298	8.84832e-06	GH5's subfamily
PL30	0	2	0	2	12	12	4	8	8	10	4	4	20	26	34	30	112	28	2	14	0	20	0	2	18	10	14	100	40	58	4	8	12	2	10	14	0.666667	7.11111	41.6667	6.33333	40	8.33333	644	1.91219e-05	Hyaluronate lyase (EC 4.2.2.1);
CBM35inCE17	8	38	6	6	8	14	4	20	10	10	8	12	16	6	6	6	12	4	4	8	4	14	2	0	4	6	2	0	2	2	4	6	14	8	4	12	17.3333	10.2222	8.33333	5.33333	2.66667	8	290	8.61078e-06	-
GH16_11	2	8	10	8	22	6	24	18	16	12	22	14	2	0	2	2	4	4	8	14	26	54	18	16	24	12	34	20	20	40	18	4	2	10	6	8	6.66667	15.7778	2.33333	22.6667	25	8	510	1.51431e-05	GH16's subfamily
GT2_Cellulose_synt	32	26	30	24	34	42	26	36	22	22	38	34	12	6	20	6	0	14	32	12	18	20	6	6	26	16	12	42	26	32	2	4	0	16	6	20	29.3333	30.8889	9.66667	15.6667	25.6667	8	720	2.13785e-05	GT2's subfamily
AA1_1	44	30	22	42	14	22	26	38	12	40	26	44	60	50	48	58	10	22	2	8	4	2	8	6	8	8	14	4	6	18	10	8	10	2	4	12	32	29.3333	41.3333	5	9.66667	7.66667	742	2.20317e-05	AA1's subfamily
GH31_18	0	0	0	0	2	2	2	0	4	0	0	6	14	4	8	28	24	30	2	2	2	0	4	0	26	32	40	12	54	52	4	8	4	8	6	16	0	1.77778	18	1.66667	36	7.66667	396	1.17582e-05	GH31's subfamily
PL14_4	2	0	0	0	0	4	0	2	0	0	0	0	4	2	2	0	0	0	14	14	24	22	10	8	114	108	88	76	66	132	8	4	8	6	4	16	0.666667	0.666667	1.33333	15.3333	97.3333	7.66667	738	2.19129e-05	PL14's subfamily
GH58	0	20	4	0	6	2	0	0	0	0	4	0	0	0	2	6	10	0	0	0	0	4	6	0	4	14	8	0	0	4	2	22	12	0	0	8	8	1.33333	3	1.66667	5	7.33333	138	4.09754e-06	Endo-α-sialidase (EC 3.2.1.129);
GH98	0	0	0	0	0	2	0	2	6	2	2	4	4	2	14	14	12	18	0	2	4	0	0	4	2	0	0	0	2	14	4	14	4	8	6	8	0	2	10.6667	1.66667	3	7.33333	154	4.57262e-06	Blood-group endo-β-1,4-galactosidase (EC 3.2.1.102);Endo-β-1,4-xylanase (EC 3.2.1.8);
GT59	20	16	16	30	20	30	60	24	8	16	8	30	16	60	16	20	22	28	24	14	38	36	40	20	26	6	18	4	28	18	16	8	4	8	4	4	17.3333	25.1111	27	28.6667	16.6667	7.33333	756	2.24474e-05	Dol-P-Glc: Glc2Man9GlcNAc2-PP-Dol α-1,2-glucosyltransferase (EC 2.4.1.256);
CBM14	10	12	8	2	2	12	2	0	6	4	4	4	12	12	14	4	16	2	2	2	10	14	4	0	4	4	0	14	0	4	14	6	4	10	4	4	10	4	10	5.33333	4.33333	7	226	6.71047e-06	Modules of approx. 70 residues. The chitin-binding function has been demonstrated in several cases. These modules are found attached to a number of chitinase catalytic domains, but also in non-catalytic proteins either in isolation or as multiple repeats; chitin binding (EC IIa.chitin)
GH160	12	12	0	6	4	10	4	8	12	26	24	12	4	0	6	0	0	4	4	0	14	6	0	2	16	30	26	8	0	0	2	8	10	8	8	6	8	11.7778	2.33333	4.33333	13.3333	7	292	8.67016e-06	Endo-β-1,4-galactosidase (EC 3.2.1.-);
GH30_7	22	20	20	44	20	18	36	38	16	52	26	22	12	4	14	18	10	48	16	14	16	8	6	4	10	4	14	4	2	14	18	4	6	6	2	6	20.6667	30.2222	17.6667	10.6667	8	7	594	1.76372e-05	GH30's subfamily
GH43_16	34	34	34	22	38	50	18	38	44	46	18	22	36	32	36	16	14	8	0	4	0	16	6	2	32	34	36	54	40	54	6	4	18	4	6	4	34	32.8889	23.6667	4.66667	41.6667	7	860	2.55354e-05	GH43's subfamily
GH43_22	8	0	18	146	182	302	158	238	168	118	68	312	154	52	76	34	10	96	2	6	6	4	6	0	24	34	42	18	20	22	2	4	10	12	10	4	8.66667	188	70.3333	4	26.6667	7	2366	7.02521e-05	GH43's subfamily
GT100	2	2	2	0	4	22	6	4	4	8	2	4	16	2	8	0	4	4	0	0	0	0	0	6	0	0	0	0	0	10	4	8	4	6	8	12	2	6	5.66667	1	1.66667	7	152	4.51324e-06	CMP-Neu5Ac: Gal-β-1,3-GalNAc-α-PP-lipid α-2,3-sialyltransferase (EC 2.4.3.-);
GT114	18	16	12	30	22	38	14	26	12	28	26	12	20	14	2	14	36	4	16	16	2	30	10	14	16	22	32	38	20	22	6	2	4	8	12	10	15.3333	23.1111	15	14.6667	25	7	624	1.8528e-05	β-xylosyltransferase (EC 2.4.1.-);
GH118	0	14	10	8	4	4	4	12	12	10	2	6	6	2	4	6	14	0	8	0	0	46	2	6	2	4	6	12	2	10	2	2	8	4	8	16	8	6.88889	5.33333	10.3333	6	6.66667	256	7.60124e-06	β-agarase (EC 3.2.1.81);
GH43_6	0	0	0	4	0	6	0	2	0	2	6	2	6	2	0	0	0	0	2	0	4	0	0	0	4	2	0	0	0	6	8	2	10	4	8	8	0	2.44444	1.33333	1	2	6.66667	88	2.61293e-06	GH43's subfamily
GH5_8	4	34	8	152	142	250	200	170	192	126	172	146	52	26	36	28	26	34	48	12	10	198	28	40	36	24	26	24	68	70	8	6	2	8	4	12	15.3333	172.222	33.6667	56	41.3333	6.66667	2422	7.19148e-05	GH5's subfamily
GT6	4	2	2	4	8	12	20	16	20	18	6	4	10	14	12	22	24	18	0	0	4	0	12	14	4	0	0	74	28	8	8	0	6	10	4	12	2.66667	12	16.6667	5	19	6.66667	400	1.18769e-05	Fucosylgalactoside 3-α-galactosyltransferase (EC 2.4.1.37);Glycoprotein-fucosylgalactoside α-N-acetylgalactosaminyltransferase (EC 2.4.1.40);N-acetyllactoside 3-α-galactosyltransferase (EC 2.4.1.87);Globoside α-N-acetylgalactosaminyltransferase (EC 2.4.1.88);
PL16	0	0	0	0	0	0	0	0	0	0	0	0	0	0	0	0	0	0	0	0	0	0	0	0	0	0	0	0	0	0	8	14	6	2	8	2	0	0	0	0	0	6.66667	40	1.18769e-06	Hyaluronate lyase (EC 4.2.2.1);
CBM54	2	0	2	14	6	0	8	22	8	6	2	4	42	16	28	30	48	10	10	14	10	26	18	12	20	34	6	20	36	26	14	0	0	4	4	16	1.33333	7.77778	29	15	23.6667	6.33333	518	1.53806e-05	Binding to xylan, yeast cell wall glucan and chitin shown in Dvortsov et al., Microbiology UK (2009) in press.
CBM94	8	8	2	0	0	0	0	0	0	0	0	0	0	10	2	0	0	0	0	4	0	4	0	0	0	10	0	2	4	0	6	4	4	10	6	8	6	0	2	1.33333	2.66667	6.33333	92	2.7317e-06	N-Acetylglucosamine binding
AA9	4	4	2	0	8	2	4	0	2	2	2	0	2	4	8	4	12	4	0	2	6	6	4	4	20	18	30	6	0	20	0	4	2	16	8	6	3.33333	2.22222	5.66667	3.66667	15.6667	6	216	6.41355e-06	Lytic cellulose monooxygenase (C1-hydroxylating) (EC 1.14.99.54);Lytic cellulose monooxygenase (C4-dehydrogenating) (EC 1.14.99.56);
GH16_17	0	6	0	6	2	0	6	6	16	12	10	6	14	4	6	2	8	0	18	30	34	18	16	10	42	28	30	84	76	92	16	4	2	2	8	4	2	7.11111	5.66667	21	58.6667	6	618	1.83499e-05	GH16's subfamily
GT44	14	8	4	0	0	0	0	0	0	0	0	0	2	6	2	0	0	4	14	0	6	2	4	0	20	24	24	68	20	52	6	6	2	2	6	14	8.66667	0	2.33333	4.33333	34.6667	6	310	9.20463e-06	UDP-Glc: α-glucosyltransferase (EC 2.4.1.-);UDP-GlcNAc: α-N-acetylglucosaminyltransferase (EC 2.4.1.-);[retaining] UDP-GlcNAc: polypeptide α-N-acetylglucosaminyltransferase (EC 2.4.1.-);
GT108	16	2	4	10	0	0	4	2	0	0	0	0	24	22	14	6	12	2	0	0	0	0	0	0	0	0	0	0	0	0	12	0	8	6	2	6	7.33333	1.77778	13.3333	0	0	5.66667	152	4.51324e-06	GDP-α-D-Manp: β-1,2-D-mannosyltransferase (EC 2.4.1.374);
CBM93	28	14	16	14	8	10	10	8	4	8	12	12	16	14	10	46	18	14	0	0	4	0	0	0	6	0	0	2	6	14	6	4	6	6	2	8	19.3333	9.55556	19.6667	0.666667	4.66667	5.33333	326	9.6797e-06	broad-specificity glycan binding
GH5_54	14	2	26	2	2	2	10	2	2	10	6	12	6	8	0	0	0	0	4	4	2	4	4	4	6	0	2	0	2	0	6	14	0	8	2	2	14	5.33333	2.33333	3.66667	1.66667	5.33333	168	4.98831e-06	GH5's subfamily
PL7_3	0	4	0	0	0	0	0	0	0	0	0	0	6	2	4	0	0	0	10	8	10	32	16	18	6	8	18	12	12	18	8	0	0	8	8	8	1.33333	0	2	15.6667	12.3333	5.33333	216	6.41355e-06	PL7's subfamily
CBM49	0	0	0	0	0	0	0	0	0	0	2	0	0	0	0	10	0	8	0	0	0	0	0	0	0	0	0	0	0	0	4	6	2	0	8	10	0	0.222222	3	0	0	5	50	1.48462e-06	Modules of approx. 100 residues found at the C-terminus of plant GH9 enzymes. Distantly related to CBM2 modules. Binding to crystalline cellulose demonstrated in the case of Solanum lycopersicum Cel8 enzyme (SlCel9C1).
CBM89	2	14	4	134	74	84	60	108	80	70	90	128	42	30	16	28	6	24	12	18	10	6	26	0	20	20	6	14	12	30	2	6	6	4	8	4	6.66667	92	24.3333	12	17	5	1198	3.55714e-05	beechwood xylan and rye arabinoxylan binding
GH13_17	8	0	4	0	0	2	0	6	2	24	18	16	2	0	6	0	2	2	0	0	0	0	0	4	2	0	0	0	0	0	6	6	10	0	2	6	4	7.55556	2	0.666667	0.333333	5	128	3.80062e-06	GH13's subfamily
GH16_12	0	4	0	0	4	2	0	2	4	0	6	2	0	6	10	0	0	0	2	2	2	2	0	2	2	2	6	4	6	6	6	2	2	8	2	10	1.33333	2.22222	2.66667	1.66667	4.33333	5	106	3.14739e-06	GH16's subfamily
GH31_12	4	10	2	20	12	8	40	0	52	4	10	4	28	18	14	54	108	28	10	22	22	12	8	2	42	106	78	60	24	50	8	4	2	2	6	8	5.33333	16.6667	41.6667	12.6667	60	5	882	2.61886e-05	GH31's subfamily
GH5_15	0	0	0	0	0	0	0	0	0	0	0	0	0	0	2	2	2	0	0	0	0	0	0	0	0	0	0	0	0	0	4	8	2	4	6	4	0	0	1	0	0	4.66667	34	1.00954e-06	GH5's subfamily
GT52	0	0	0	0	0	0	4	0	0	0	0	0	0	0	0	0	0	0	0	2	0	4	2	0	20	24	18	0	2	6	2	0	2	6	12	6	0	0.444444	0	1.33333	11.6667	4.66667	110	3.26616e-06	CMP-NeuAc: β-galactoside α-2,6-sialyltransferase (EC 2.4.3.1);CMP-Neu5Ac: β-galactoside α-2,3-sialyltransferase (EC 2.4.3.4);CMP-Neu5Ac: N-acetyllactoside α-2,3-sialyltransferase (EC 2.4.3.6);
GH43_36	0	2	6	14	16	6	14	2	14	6	6	4	6	10	24	6	4	4	2	0	2	0	0	0	18	0	8	4	2	4	4	6	2	2	2	10	2.66667	9.11111	9	0.666667	6	4.33333	210	6.23539e-06	GH43's subfamily
GH5_17	18	8	12	20	62	24	30	36	22	32	32	42	14	8	0	6	4	10	0	0	6	0	2	0	2	0	4	2	4	2	4	6	8	6	2	0	12.6667	33.3333	7	1.33333	2.33333	4.33333	428	1.27083e-05	GH5's subfamily
GT31	0	2	6	10	4	4	2	2	14	18	16	16	12	40	14	18	44	18	8	8	14	24	18	16	6	8	2	10	16	8	10	2	2	6	6	0	2.66667	9.55556	24.3333	14.6667	8.33333	4.33333	404	1.19957e-05	UDP-Gal: β-1,3-galactan β-1,3-galactosyltransferase (EC 2.4.1.-);UDP-Gal: β-1,6-galactan β-1,6-galactosyltransferase (EC 2.4.1.-);UDP-Gal: glycosaminoglycan β-1,3-galactosyltransferase (EC 2.4.1.-);UDP-Gal: mannosylinositolphosphoceramide β-1,6-galactosyltransferase (EC 2.4.1.-);UDP-GalNAc: β-1,3-N-acetylgalactosaminyltrasferase (EC 2.4.1.-);UDP-Galf: [galactomannan] β-galactofuranoside β-1,5-gal…
GT82	2	4	2	4	6	2	4	10	2	6	4	12	0	8	4	4	2	2	0	0	2	0	0	0	2	2	2	0	0	2	6	4	2	4	2	8	2.66667	5.55556	3.33333	0.333333	1.33333	4.33333	114	3.38493e-06	UDP-GalNAc: β-1,4-N-acetylgalactosaminyltransferase (EC 2.4.1.-);
GH101	34	4	18	2	0	0	4	8	0	0	4	2	8	24	10	16	6	6	0	6	0	0	0	0	6	0	6	20	32	40	4	8	4	0	4	4	18.6667	2.22222	11.6667	1	17.3333	4	280	8.31386e-06	Glycopeptide α-N-acetylgalactosaminidase (EC 3.2.1.97);
GH130_11	0	74	8	0	0	4	0	2	0	2	0	0	0	0	0	0	0	0	0	2	0	4	0	0	0	0	0	6	0	0	4	2	4	2	2	10	27.3333	0.888889	0	1	1	4	126	3.74123e-06	GH130's subfamily
GH14	2	14	0	18	16	4	4	0	8	2	10	14	4	4	6	2	6	4	6	12	2	0	6	4	0	0	0	2	0	2	4	2	12	0	4	2	5.33333	8.44444	4.33333	5	0.666667	4	176	5.22585e-06	[inverting] β-amylase (EC 3.2.1.2);
GH51_6	42	56	32	2	0	0	6	0	8	10	12	8	8	2	4	20	32	12	16	18	22	40	6	8	62	78	62	54	70	102	2	4	8	4	0	6	43.3333	5.11111	13	18.3333	71.3333	4	816	2.42289e-05	GH51's subfamily
GT2_Chitin_synth_1	0	2	2	0	0	0	2	0	0	0	4	0	0	4	2	4	20	6	12	14	22	16	8	8	6	12	12	16	8	20	4	4	6	2	8	0	1.33333	0.666667	6	13.3333	12.3333	4	224	6.65108e-06	GT2's subfamily
PL7_4	0	0	0	4	0	0	0	0	0	2	0	0	6	2	0	2	0	2	0	4	2	4	4	0	6	8	2	4	4	2	2	2	4	4	2	10	0	0.666667	2	2.33333	4.33333	4	82	2.43477e-06	PL7's subfamily
CBM3	10	32	6	102	72	104	120	106	160	82	120	114	16	12	6	20	10	28	0	2	4	0	2	4	14	18	16	134	148	68	12	4	0	2	0	4	16	108.889	15.3333	2	66.3333	3.66667	1552	4.60825e-05	Modules of approx. 150 residues found in bacterial enzymes. The cellulose-binding function has been demonstrated in many cases. In one instance binding to chitin has been reported.
GH52	0	0	0	0	2	0	0	0	2	2	2	4	0	2	0	0	0	2	2	2	0	0	8	0	58	58	42	88	38	60	0	10	2	0	8	2	0	1.33333	0.666667	2	57.3333	3.66667	394	1.16988e-05	Xylan β-1,4-xylosidase (EC 3.2.1.37);
GT69	0	0	0	10	4	8	18	2	24	8	16	16	26	12	12	30	108	20	10	28	40	24	0	8	16	16	8	18	16	26	2	4	2	0	4	10	0	11.7778	34.6667	18.3333	16.6667	3.66667	546	1.6212e-05	GDP-Man: α-1,3-mannosyltransferase (EC 2.4.1.-);
PL24	0	2	0	0	0	0	0	0	0	0	0	0	6	8	12	4	4	12	0	0	0	0	0	0	0	0	0	0	0	0	6	2	4	2	4	4	0.666667	0	7.66667	0	0	3.66667	70	2.07846e-06	Glucuronic specific ulvan lyase (EC 4.2.2.-);Ulvan lyase (EC 4.2.2.-);
PL36_1	0	0	2	0	0	0	0	0	0	0	0	0	0	0	8	2	0	0	0	0	0	0	0	2	0	0	0	0	0	0	0	2	10	4	0	6	0.666667	0	1.66667	0.333333	0	3.66667	36	1.06892e-06	PL36's subfamily
CBM12	0	0	0	0	6	0	4	0	0	0	0	0	2	0	2	2	12	4	0	0	2	0	6	0	4	2	2	0	6	16	2	2	2	2	6	6	0	1.11111	3.66667	1.33333	5	3.33333	90	2.67231e-06	Modules of approx. 40-60 residues. The majority of these modules is found among chitinases where the function is chitin-binding. Distantly related to the CBM5 family.
CBM59	0	10	0	0	2	0	4	6	0	0	6	2	0	0	0	0	18	2	0	2	0	0	2	0	6	2	0	2	20	0	4	2	2	6	4	2	3.33333	2.22222	3.33333	0.666667	5	3.33333	104	3.088e-06	Binding to mannan, xylan, and cellulose demonstrated for the CBM59 of ManF-X10 xylanase from an environmental genomic DNA library (Li et al. (2009) World Journal of Microbiology and Biotechnology 25:2071-2078; doi:10.1007/s11274-009-0111-6)
GH11	12	50	8	38	14	18	14	4	4	38	38	14	12	6	6	0	8	4	0	0	0	12	2	0	0	0	2	26	14	16	4	2	4	0	6	4	23.3333	20.2222	6	2.33333	9.66667	3.33333	380	1.12831e-05	Xylan β-1,4-xylosidase (EC 3.2.1.37);Endo-β-1,4-xylanase (EC 3.2.1.8);
GH45_2	0	2	0	0	0	2	0	2	8	0	2	0	0	0	0	0	0	0	0	2	4	4	0	2	0	0	2	16	2	4	0	8	4	6	2	0	0.666667	1.55556	0	2	4	3.33333	72	2.13785e-06	GH45's subfamily
GH5_18	2	0	2	0	0	0	2	2	0	4	0	0	2	0	2	0	4	0	2	12	16	8	14	4	2	6	4	6	14	4	6	0	8	0	4	2	1.33333	0.888889	1.33333	9.33333	6	3.33333	132	3.91939e-06	GH5's subfamily
AA8	0	6	0	0	0	0	4	0	2	0	0	2	4	0	0	0	0	10	2	2	0	0	0	0	0	0	0	0	0	0	8	0	4	2	2	2	2	0.888889	2.33333	0.666667	0	3	50	1.48462e-06	No protein characterized
CBM46	36	20	50	0	4	6	4	2	6	4	0	16	4	8	0	0	0	0	8	6	8	8	22	8	8	8	16	4	16	18	2	4	4	2	6	0	35.3333	4.66667	2	10	11.6667	3	308	9.14524e-06	Modules of approx. 100 residues, found at the C-terminus of several GH5 cellulases. Cellulose-binding function demonstrated in one case.
CBM71	4	2	2	0	0	0	0	0	0	0	0	0	6	0	4	2	6	2	2	0	0	0	0	6	0	0	0	0	0	2	4	4	2	4	0	4	2.66667	0	3.33333	1.33333	0.333333	3	56	1.66277e-06	The two CBM71s of S. pneumoniae BgaA bind lactose and LacNAc.
GH13_22	0	4	0	0	0	0	0	0	2	0	0	0	0	4	12	0	2	14	0	4	0	0	0	0	0	0	0	0	0	0	2	2	4	4	2	4	1.33333	0.222222	5.33333	0.666667	0	3	60	1.78154e-06	GH13's subfamily
GH31_9	0	0	0	6	2	14	4	10	28	4	6	20	2	2	0	6	0	0	0	0	0	6	4	0	2	8	0	0	0	0	6	8	4	0	0	0	0	10.4444	1.66667	1.66667	1.66667	3	142	4.21631e-06	GH31's subfamily
GH72	0	0	2	22	8	4	24	28	24	12	14	22	2	4	2	22	42	24	0	0	0	0	2	0	2	6	6	0	6	18	0	4	6	2	6	0	0.666667	17.5556	16	0.333333	6.33333	3	314	9.32339e-06	[retaining] β-1,3-glucanosyltransglucosidase (EC 2.4.1.-);
PL2_1	2	0	2	2	0	0	2	0	0	0	0	0	6	12	6	4	4	2	4	0	0	0	2	0	6	0	0	46	2	10	10	2	0	0	4	2	1.33333	0.444444	5.66667	1	10.6667	3	130	3.86e-06	PL2's subfamily
GH13_40	0	2	0	6	0	2	8	2	8	8	4	12	20	18	16	22	54	26	2	0	0	2	0	0	2	0	8	2	0	2	0	4	2	2	4	4	0.666667	5.55556	26	0.666667	2.33333	2.66667	242	7.18555e-06	GH13's subfamily
GH130_10	2	0	2	8	2	2	0	2	0	0	4	0	16	20	6	34	16	16	0	0	0	0	0	10	0	0	0	0	0	0	2	4	2	2	2	4	1.33333	2	18	1.66667	0	2.66667	156	4.63201e-06	GH130's subfamily
GH16_6	0	0	0	0	0	0	0	0	0	0	0	0	0	0	6	2	0	0	0	0	4	0	2	0	0	0	0	2	0	4	12	0	0	0	2	2	0	0	1.33333	1	1	2.66667	36	1.06892e-06	GH16's subfamily
GH31_17	0	0	4	0	0	0	0	0	0	0	6	4	10	10	4	18	14	58	6	4	0	0	0	2	2	8	2	16	6	16	0	4	2	4	2	4	1.33333	1.11111	19	2	8.33333	2.66667	206	6.11662e-06	GH31's subfamily
GH43_13	0	8	2	2	4	6	2	4	4	4	0	0	0	0	0	0	0	14	0	0	0	0	0	2	0	2	0	10	0	2	2	6	2	2	2	2	3.33333	2.88889	2.33333	0.333333	2.33333	2.66667	82	2.43477e-06	GH43's subfamily
GH43_8	4	2	4	4	2	8	2	0	2	4	0	4	24	24	40	14	20	10	2	10	20	14	6	6	16	2	8	84	44	44	4	4	6	0	2	0	3.33333	2.88889	22	9.66667	33	2.66667	440	1.30646e-05	GH43's subfamily
GH5_27	20	42	12	8	22	12	14	28	14	24	28	22	14	24	8	10	2	16	0	0	2	0	2	4	2	2	4	2	0	2	0	0	2	0	12	2	24.6667	19.1111	12.3333	1.33333	2	2.66667	356	1.05705e-05	GH5's subfamily
GH5_37	4	0	0	0	18	8	2	0	4	0	0	6	4	2	4	6	8	6	2	0	0	0	4	0	0	6	2	6	2	6	0	4	2	4	2	2	1.33333	4.22222	5	1	3.66667	2.33333	114	3.38493e-06	GH5's subfamily
GH70	6	2	0	10	22	22	24	20	10	6	4	12	18	2	10	2	0	4	0	0	0	0	0	0	0	0	0	0	0	0	2	2	0	0	0	10	2.66667	14.4444	6	0	0	2.33333	188	5.58216e-06	[retaining] α-1,2-branched dextransucrase (EC 2.4.1.-);[retaining] α-4,3-glucanotransferase (EC 2.4.1.-);[retaining] α-4,6-glucanotransferase (EC 2.4.1.-);[retaining] reuteransucrase (EC 2.4.1.-);[retaining] alternansucrase (EC 2.4.1.140);[retaining] dextransucrase (EC 2.4.1.5);
GT24	0	6	2	2	0	0	2	0	0	0	4	6	2	0	0	4	6	18	0	0	4	2	0	8	0	0	0	0	0	0	2	0	4	4	2	2	2.66667	1.55556	5	2.33333	0	2.33333	80	2.37539e-06	Hexosyltransferases (EC 2.4.1.-);UDP-Glc: glycoprotein α-glucosyltransferase (EC 2.4.1.-);
GT63	12	0	8	0	0	0	0	0	2	0	0	8	0	2	10	0	0	0	4	0	0	0	0	0	0	2	4	8	0	0	2	0	0	2	0	10	6.66667	1.11111	2	0.666667	2.33333	2.33333	74	2.19723e-06	UDP-Glc: DNA β-glucosyltransferase (EC 2.4.1.27);
CBM39	0	0	0	0	0	0	0	4	0	0	0	0	2	0	0	2	10	10	0	0	0	12	0	0	0	2	2	0	0	2	2	6	0	0	0	4	0	0.444444	4	2	1	2	58	1.72216e-06	Modules generally found at the N-terminus of a GH16 module (itself frequently lacking a catalytic machinery) and more seldomly in isolation. The β-1,3-glucan binding function has been demonstrated, along with binding to lipopolysaccharide and lipoteichoic acid.
CBM73	8	14	0	10	6	16	14	4	0	6	4	2	4	0	4	0	2	0	2	0	6	0	2	4	2	0	4	2	6	0	2	2	0	0	6	2	7.33333	6.88889	1.66667	2.33333	2.33333	2	134	3.97877e-06	Modules of approx 65 residues found on various enzymes active of chitin. Chitin-binding function demonstrated for the Cellvibrio japonicus CjLPMO10A protein.
GH16_13	0	0	0	0	2	0	4	6	6	0	0	0	2	4	6	4	6	0	12	24	4	18	14	14	30	20	28	30	28	38	0	0	2	6	4	0	0	2	3.66667	14.3333	29	2	312	9.26401e-06	GH16's subfamily
GH16_25	0	0	4	0	0	8	8	6	2	4	8	0	30	22	22	20	74	20	8	0	0	8	0	2	0	6	0	4	10	14	4	2	2	0	2	2	1.33333	4	31.3333	3	5.66667	2	292	8.67016e-06	GH16's subfamily
GH180	4	2	6	0	4	2	0	2	0	2	6	6	56	32	34	38	32	46	2	0	0	2	0	0	0	0	0	26	16	24	0	4	4	0	2	2	4	2.44444	39.6667	0.666667	11	2	354	1.05111e-05	β-glucosidase (EC 3.2.1.21);
GH48	0	2	2	44	24	50	28	44	54	6	22	40	4	14	6	0	0	44	0	0	0	0	0	0	0	0	0	0	0	0	2	8	0	0	2	0	1.33333	34.6667	11.3333	0	0	2	396	1.17582e-05	Chitinase (EC 3.2.1.14);Reducing end-acting cellobiohydrolase (EC 3.2.1.176);Endo-β-1,4-glucanase (EC 3.2.1.4);Cellobiohydrolase (EC 3.2.1.91);
GH5_21	12	4	0	0	0	4	0	0	2	0	2	2	28	6	8	20	16	44	0	2	2	0	4	0	2	2	4	0	0	2	0	0	6	4	2	0	5.33333	1.11111	20.3333	1.33333	1.66667	2	178	5.28524e-06	GH5's subfamily
GT112	0	0	0	10	4	10	0	0	0	0	0	0	0	0	0	10	60	0	14	8	8	6	12	28	38	60	64	10	24	12	0	2	4	4	0	2	0	2.66667	11.6667	12.6667	34.6667	2	390	1.158e-05	ADP-glyceromannoheptose: glycoprotein O-heptosyltransferase (EC 2.4.99.-);
GT79	0	0	0	0	0	0	0	0	0	0	0	0	0	0	0	0	2	0	0	0	0	0	0	0	0	0	0	0	0	0	0	0	0	2	2	8	0	0	0.333333	0	0	2	14	4.15693e-07	GDP-D-Ara: phosphoglycan α-1,2-D-arabinopyranosyltransferase 1 (EC 2.4.2.-);
PL1_8	0	4	0	18	8	30	26	4	30	14	34	6	2	0	0	2	0	2	0	0	0	0	0	0	0	0	0	0	0	0	2	2	4	0	0	4	1.33333	18.8889	1	0	0	2	192	5.70093e-06	PL1's subfamily
PL4_2	26	44	22	26	12	28	36	38	48	40	50	104	16	6	8	0	0	6	0	8	2	6	0	0	16	12	22	24	16	28	0	10	2	0	0	0	30.6667	42.4444	6	2.66667	19.6667	2	656	1.94782e-05	PL4's subfamily
PL5_1	0	0	0	0	0	0	0	0	0	2	0	0	0	2	0	6	0	0	0	0	0	0	0	0	0	0	0	0	0	0	0	0	4	2	4	2	0	0.222222	1.33333	0	0	2	22	6.53231e-07	PL5's subfamily
PL7_2	0	0	0	0	0	0	0	0	0	0	0	0	0	0	0	0	0	0	0	0	0	0	0	0	2	8	0	4	0	2	2	0	0	0	0	10	0	0	0	0	2.66667	2	28	8.31386e-07	PL7's subfamily
CBM45	4	4	0	18	6	22	30	8	22	32	18	28	14	0	6	2	0	12	2	0	8	0	0	0	14	10	4	24	8	20	4	2	0	0	4	0	2.66667	20.4444	5.66667	1.66667	13.3333	1.66667	326	9.6797e-06	Modules of approx. 100 residues, found at the N-terminus of plastidial α-amylases and of α-glucan, water dikinases. Starch-binding activity demonstrated in the case of potato α-glucan, water dikinase.
CBM90	0	0	0	0	0	0	0	0	0	2	0	0	0	0	0	0	0	0	0	0	0	0	6	0	2	0	0	38	80	30	2	0	2	4	2	0	0	0.222222	0	1	25	1.66667	168	4.98831e-06	ulvan binding
GH169	0	2	0	10	4	2	4	4	0	6	2	6	0	2	0	0	4	2	6	0	0	10	2	6	30	18	20	36	30	26	2	4	0	2	2	0	0.666667	4.22222	1.33333	4	26.6667	1.66667	242	7.18555e-06	β-1,4-D-glucuronidase (EC 3.2.1.-);
GH43_7	2	0	0	42	20	24	42	36	44	42	50	42	20	10	2	36	22	32	6	2	2	0	12	4	2	2	4	14	4	4	0	0	4	4	2	0	0.666667	38	20.3333	4.33333	5	1.66667	532	1.57963e-05	GH43's subfamily
GH51_9	4	38	4	4	0	6	6	8	8	38	18	20	12	4	8	4	2	0	0	0	0	0	2	0	2	2	4	8	30	6	0	2	0	4	4	0	15.3333	12	5	0.333333	8.66667	1.66667	248	7.3637e-06	GH51's subfamily
GH83	0	0	0	0	0	0	0	0	0	0	0	0	0	0	4	2	6	2	0	0	0	0	4	0	14	6	8	2	2	18	2	2	4	0	0	2	0	0	2.33333	0.666667	8.33333	1.66667	78	2.316e-06	Exo-α-sialidase (EC 3.2.1.18);
PL1_10	0	0	0	0	0	0	0	0	0	0	0	0	0	0	0	0	2	0	2	2	0	2	0	0	0	0	0	0	0	2	4	0	0	4	2	0	0	0	0.333333	1	0.333333	1.66667	20	5.93847e-07	PL1's subfamily
PL1_12	0	0	0	6	6	4	0	4	0	2	10	4	0	0	0	0	0	2	0	0	0	0	0	0	0	0	0	0	0	0	0	0	8	2	0	0	0	4	0.333333	0	0	1.66667	48	1.42523e-06	PL1's subfamily
PL14_2	0	0	0	0	0	0	0	0	0	0	0	0	0	0	0	0	0	0	2	0	6	0	0	0	0	0	0	0	0	0	0	2	0	0	6	2	0	0	0	1.33333	0	1.66667	18	5.34462e-07	PL14's subfamily
CBM42	0	0	0	14	38	24	4	22	6	16	20	8	16	6	4	14	4	22	2	0	10	0	2	10	0	4	4	20	44	20	2	0	2	2	2	0	0	16.8889	11	4	15.3333	1.33333	342	1.01548e-05	Modules of approx. 160 residues found mostly at the C-terminus of GH54 catalytic domains. Binding to arabinofuranose (present in arabinoxylan) has been demonstrated.
CBM53	0	0	0	0	2	14	2	0	14	0	0	4	2	2	0	14	0	4	0	0	0	4	0	0	0	0	0	10	6	12	0	0	0	0	8	0	0	4	3.66667	0.666667	4.66667	1.33333	98	2.90985e-06	Starch-binding function demonstrated by Valdez et al. (2008) [PMID: 18260645]
CBM77	16	2	0	2	12	24	30	10	52	18	18	32	4	2	10	2	4	4	0	0	0	0	0	0	8	20	6	6	0	8	2	2	2	0	2	0	6	22	4.33333	0	8	1.33333	298	8.84832e-06	Pectin binding modules of approx. 110 residues. The Ruminococcus flavefaciens CBM77 was shown to bind various pectins of low degree of esterification.
GH30_5	14	6	0	100	80	112	120	88	138	142	82	214	158	42	48	84	118	118	6	0	6	2	0	0	16	0	14	84	48	46	0	2	0	0	6	0	6.66667	119.556	94.6667	2.33333	34.6667	1.33333	1894	5.62373e-05	GH30's subfamily
GT74	30	2	18	80	46	78	110	148	64	114	152	96	8	8	6	14	44	68	8	4	4	2	56	36	22	12	20	96	42	26	6	0	0	0	2	0	16.6667	98.6667	24.6667	18.3333	36.3333	1.33333	1422	4.22225e-05	GDP-L-Fuc: galactoside α-1,2-L-fucosyltransferase (EC 2.4.1.69);
PL1_13	0	0	0	0	0	0	0	0	0	0	0	0	0	0	0	0	0	0	0	0	0	0	0	0	0	0	0	0	0	0	0	0	2	0	4	2	0	0	0	0	0	1.33333	8	2.37539e-07	PL1's subfamily
CBM79	0	0	6	0	0	0	0	0	0	0	0	0	0	0	0	0	0	0	0	0	0	2	0	0	2	16	12	12	6	48	0	0	4	2	0	0	2	0	0	0.333333	16	1	110	3.26616e-06	Modules of approx. 130 residues found so far only in ruminococcal proteins. Binding to various β-glucans was shown for the R. flavefaciens GH9 enzyme.
GH122	0	0	2	2	0	0	0	0	4	0	0	0	2	2	0	4	4	4	0	0	0	0	0	0	0	0	0	0	0	0	0	0	0	0	4	2	0.666667	0.666667	2.66667	0	0	1	30	8.9077e-07	α-glucosidase (EC 3.2.1.20);
GH124	4	4	0	0	2	2	0	0	0	0	2	0	0	0	2	2	0	12	4	2	0	14	0	2	10	12	10	152	78	42	0	2	0	0	2	2	2.66667	0.666667	2.66667	3.66667	50.6667	1	362	1.07486e-05	Endo-β-1,4-glucanase (EC 3.2.1.4);
GH13_43	0	0	0	34	28	16	24	14	16	14	26	12	30	6	20	6	2	10	10	4	0	42	4	8	18	16	4	28	20	44	0	2	0	4	0	0	0	20.4444	12.3333	11.3333	21.6667	1	462	1.37179e-05	GH13's subfamily
GH16_8	0	0	0	0	0	0	0	2	0	0	0	0	0	0	0	0	0	0	0	0	0	0	0	0	0	0	0	0	0	0	0	4	0	0	2	0	0	0.222222	0	0	0	1	8	2.37539e-07	GH16's subfamily
GH162	0	0	0	0	0	0	0	4	0	0	0	0	0	0	0	0	0	0	0	2	0	0	0	0	0	2	0	0	0	0	2	0	2	0	0	2	0	0.444444	0	0.333333	0.333333	1	14	4.15693e-07	Endo-β-1,2-glucanase (EC 3.2.1.71);
GH43_32	0	0	0	42	12	34	16	30	28	26	30	52	36	28	26	20	44	12	0	2	4	2	4	0	14	4	20	18	22	40	2	0	4	0	0	0	0	30	27.6667	2	19.6667	1	572	1.6984e-05	GH43's subfamily
GH5_31	0	0	0	4	0	2	0	0	0	0	0	0	0	0	0	2	0	0	0	0	0	0	0	0	0	0	0	0	0	0	0	0	0	2	4	0	0	0.666667	0.333333	0	0	1	14	4.15693e-07	GH5's subfamily
GT95	4	0	0	28	36	28	28	36	24	64	22	22	20	26	4	6	14	10	4	0	4	14	2	2	8	8	0	0	16	0	0	0	2	0	0	4	1.33333	32	13.3333	4.33333	5.33333	1	436	1.29459e-05	UDP-β-L-Araf:hydroxyproline β-L-arabinofuranosyltransferase (EC 2.4.2.-);
PL28	10	8	4	4	0	0	0	4	0	0	0	0	4	6	8	0	0	2	2	0	4	0	2	0	0	2	0	0	2	2	0	2	0	2	0	2	7.33333	0.888889	3.33333	1.33333	1	1	70	2.07846e-06	Ulvan lyase (EC 4.2.2.-);
AA14	0	0	0	0	0	0	0	0	0	0	0	0	0	0	0	0	0	0	0	0	0	0	0	0	0	0	0	0	0	0	0	2	0	2	0	0	0	0	0	0	0	0.666667	4	1.18769e-07	Lytic xylan monooxygenase / xylan oxidase (glycosidic bond-cleaving) (EC 1.14.99.-);
GH130_14	12	98	4	0	0	0	0	0	0	0	0	0	0	0	6	4	2	0	0	0	0	0	0	0	4	2	0	4	0	12	0	0	0	0	0	4	38	0	2	0	3.66667	0.666667	152	4.51324e-06	GH130's subfamily
GH130_7	2	0	0	0	0	0	0	0	0	0	0	6	28	20	22	26	32	12	4	6	0	0	2	8	22	16	6	58	16	44	0	2	0	0	0	2	0.666667	0.666667	23.3333	3.33333	27	0.666667	334	9.91724e-06	GH130's subfamily
GH31_8	6	2	18	6	0	10	8	14	8	2	0	0	12	0	2	26	24	12	0	0	2	0	0	2	14	18	2	4	10	2	0	0	0	0	4	0	8.66667	5.33333	12.6667	0.666667	8.33333	0.666667	208	6.17601e-06	GH31's subfamily
GH43_15	0	0	0	0	0	0	0	0	0	0	0	0	0	0	0	0	0	0	0	0	0	0	4	0	12	2	6	32	14	42	0	0	0	0	2	2	0	0	0	0.666667	18	0.666667	116	3.44431e-06	GH43's subfamily
GH51_10	2	28	6	6	6	6	6	10	8	2	6	14	10	2	0	2	18	2	0	0	0	0	0	4	0	0	6	24	4	28	0	2	2	0	0	0	12	7.11111	5.66667	0.666667	10.3333	0.666667	204	6.05724e-06	GH51's subfamily
GT109	0	0	0	0	2	0	2	14	0	0	2	2	4	16	12	0	0	0	2	0	0	6	0	2	2	0	0	0	2	2	4	0	0	0	0	0	0	2.44444	5.33333	1.66667	1	0.666667	74	2.19723e-06	UDP-GalNAc: β-1,4-N-acetylgalactosaminyltransferase (EC 2.4.1.-);
GT48	0	0	0	0	0	2	0	0	0	0	2	0	16	14	10	8	34	12	2	0	0	0	8	4	4	2	0	4	0	2	0	0	0	2	2	0	0	0.444444	15.6667	2.33333	2	0.666667	128	3.80062e-06	UDP-Glc: β-1,3-glucan synthase / callose synthase (EC 2.4.1.34);
PL1_6	0	0	0	86	76	112	74	104	74	52	46	60	22	10	2	14	0	56	0	0	0	0	0	0	0	0	0	46	0	18	0	0	0	0	0	4	0	76	17.3333	0	10.6667	0.666667	856	2.54166e-05	PL1's subfamily
PL15_2	0	2	2	0	0	0	0	0	0	0	0	0	0	0	0	0	0	0	2	0	2	2	0	0	4	0	2	0	0	2	0	0	0	0	4	0	1.33333	0	0	1	1.33333	0.666667	22	6.53231e-07	PL15's subfamily
PL17_1	20	10	8	2	2	0	2	0	0	0	0	2	2	0	0	0	0	0	0	0	2	0	0	8	0	0	0	0	0	0	0	0	2	0	0	2	12.6667	0.888889	0.333333	1.66667	0	0.666667	62	1.84093e-06	PL17's subfamily
AA15	0	2	0	88	76	50	68	114	22	86	90	62	32	48	26	16	2	32	0	0	4	0	8	0	0	0	0	0	0	0	0	0	0	2	0	0	0.666667	72.8889	26	2	0	0.333333	828	2.45853e-05	Lytic chitin monooxygenase (EC 1.14.99.53);Lytic cellulose monooxygenase (C1-hydroxylating) (EC 1.14.99.54);
AA16	2	0	2	6	2	2	2	8	12	10	6	2	0	0	4	0	2	2	0	0	0	0	0	2	0	0	0	0	0	0	2	0	0	0	0	0	1.33333	5.55556	1.33333	0.333333	0	0.333333	66	1.95969e-06	Lytic cellulose monooxygenase (C1-hydroxylating) (EC 1.14.99.54);
CBM17	0	2	0	2	0	0	0	4	2	0	0	0	0	0	0	0	0	0	0	0	0	0	0	0	0	0	0	0	0	0	0	0	0	2	0	0	0.666667	0.888889	0	0	0	0.333333	12	3.56308e-07	Modules of approx. 200 residues. Binding to amorphous cellulose, cellooligosaccharides and derivatized cellulose has been demonstrated.
CBM36	0	0	0	10	2	6	16	6	14	6	2	4	6	20	4	0	8	8	0	0	0	0	0	0	0	0	0	0	0	0	2	0	0	0	0	0	0	7.33333	7.66667	0	0	0.333333	114	3.38493e-06	Modules of approx. 120-130 residues displaying structural similarities to CBM6 modules. The only CBM36 currently characterised, that from Paenbacillus polymyxa xylanase 43A, shows calcium-dependent binding of xylans and xylooligosaccharides. X-ray crystallography shows that there is a direct interaction between calcium and ligand.
CBM52	0	0	0	0	0	0	0	0	0	0	0	0	0	0	0	0	0	0	0	0	0	0	0	0	2	0	0	6	0	0	0	0	0	0	0	2	0	0	0	0	1.33333	0.333333	10	2.96923e-07	Modules of approx. 60 residues attached to a few GH81 enzymes but present in other proteins. Binding to β-1,3-glucan demonstrated for Schizosaccharomyces pombe 972h- endo-1,3-β-glucanase Eng1 [Martin-Quadrado et al., Mol. Microbiol. (2008) 69:188-200 PMID:18466295]
CBM64	0	2	4	4	4	10	6	4	14	10	16	8	2	0	0	4	0	2	0	0	0	0	0	0	4	2	2	42	22	22	0	0	0	0	0	2	2	8.44444	1.33333	0	15.6667	0.333333	186	5.52278e-06	Module found at C-term of several Spirochaeta thermophila proteins. Binding to cellulose shown by Angelov, Loderer, Pompei & Liebl (2011) AEM, 77:5483-5489 [PMID - 21685171]
GH13_12	4	4	4	0	6	0	2	2	2	10	0	8	10	16	4	8	2	4	0	0	0	4	0	0	0	0	0	0	0	0	0	0	0	0	2	0	4	3.33333	7.33333	0.666667	0	0.333333	92	2.7317e-06	GH13's subfamily
GH13_28	0	0	2	0	0	4	0	0	0	0	0	0	0	0	0	0	0	0	0	0	0	0	14	0	0	0	0	0	0	4	0	0	0	2	0	0	0.666667	0.444444	0	2.33333	0.666667	0.333333	26	7.72001e-07	GH13's subfamily
GH130_16	0	0	0	2	0	2	0	2	0	0	2	0	0	0	0	12	12	0	0	0	0	0	0	0	0	0	0	0	0	0	0	0	2	0	0	0	0	0.888889	4	0	0	0.333333	34	1.00954e-06	GH130's subfamily
GH16_23	0	0	0	0	0	0	0	8	0	2	2	0	10	2	6	6	16	4	0	0	2	0	0	0	0	2	6	0	0	0	0	0	0	0	0	2	0	1.33333	7.33333	0.333333	1.33333	0.333333	68	2.01908e-06	GH16's subfamily
GH16_26	0	0	0	0	0	0	0	0	0	0	0	0	0	0	0	0	0	0	0	0	2	0	0	0	6	0	12	2	6	0	0	0	0	2	0	0	0	0	0	0.333333	4.33333	0.333333	30	8.9077e-07	GH16's subfamily
GH19_2	0	0	0	2	8	2	6	6	2	4	2	2	0	26	22	22	6	46	22	36	28	14	12	22	12	20	16	10	42	20	0	0	0	0	2	0	0	3.77778	20.3333	22.3333	20	0.333333	412	1.22332e-05	GH19's subfamily
GH30_6	0	0	2	0	0	0	0	0	0	0	0	0	4	6	16	2	4	4	0	0	0	0	4	0	6	0	10	2	10	6	0	0	0	0	2	0	0.666667	0	6	0.666667	5.66667	0.333333	78	2.316e-06	GH30's subfamily
GH43_27	2	0	26	32	42	124	58	34	38	72	52	108	74	2	6	0	0	8	0	0	0	0	0	8	12	10	6	0	0	4	2	0	0	0	0	0	9.33333	62.2222	15	1.33333	5.33333	0.333333	720	2.13785e-05	GH43's subfamily
GH5_24	0	0	0	0	0	0	0	0	2	2	8	0	2	0	0	0	0	0	0	0	0	0	18	0	0	4	2	0	0	2	0	0	0	2	0	0	0	1.33333	0.333333	3	1.33333	0.333333	42	1.24708e-06	GH5's subfamily
GH5_34	0	2	0	4	2	2	2	0	0	0	0	0	2	0	2	10	6	0	2	6	6	0	0	0	12	10	8	16	20	12	0	0	0	0	2	0	0.666667	1.11111	3.33333	2.33333	13	0.333333	126	3.74123e-06	GH5's subfamily
GH5_4	6	66	8	102	168	150	130	178	160	100	108	154	32	22	26	38	14	104	2	0	2	10	10	2	138	150	144	430	310	328	0	0	2	0	0	0	26.6667	138.889	39.3333	4.33333	250	0.333333	3094	9.18681e-05	GH5's subfamily
GH54	10	16	18	76	78	98	78	128	62	110	120	86	36	8	6	16	124	18	2	6	8	0	12	4	90	76	70	170	108	100	0	0	0	2	0	0	14.6667	92.8889	34.6667	5.33333	102.333	0.333333	1736	5.15459e-05	β-galactosidase (EC 3.2.1.23);Xylan β-1,4-xylosidase (EC 3.2.1.37);α-L-arabinofuranosidase (EC 3.2.1.55);
GH80	8	2	0	0	0	0	0	0	0	0	0	4	0	0	0	0	0	0	0	0	0	0	4	0	0	0	0	0	0	0	0	0	0	0	0	2	3.33333	0.444444	0	0.666667	0	0.333333	20	5.93847e-07	Chitosanase (EC 3.2.1.132);
GT15	0	0	0	0	0	0	0	0	0	0	0	0	4	0	0	0	4	12	6	4	4	2	10	16	10	14	10	14	4	22	0	0	0	0	2	0	0	0	3.33333	7	12.3333	0.333333	138	4.09754e-06	GDP-Man: α-1,2-mannosyltransferase (EC 2.4.1.-);GDP-Man: Man3GlcNAc2-PP-dolichol/Man4GlcNAc2-PP-dolichol α-1,2-mannosyltransferase (EC 2.4.1.131);
GT43	2	0	2	0	0	0	0	2	0	2	0	2	0	4	8	0	0	0	2	2	2	2	0	0	0	0	0	0	0	0	0	0	0	0	0	2	1.33333	0.666667	2	1.33333	0	0.333333	32	9.50155e-07	Glycosyltransferases (EC 2.4.-.-);UDP-GlcA: β-1,4-galactosyl-xylosylprotein β-1,3-glucuronosyltransferase (EC 2.4.1.135);UDP-Xyl: xylan β-1,4-xylosyltransferase (EC 2.4.2.-);
PL18	0	0	0	0	0	4	0	0	0	2	0	0	0	0	0	0	0	0	0	0	0	0	0	0	0	0	0	0	0	2	0	0	2	0	0	0	0	0.666667	0	0	0.333333	0.333333	10	2.96923e-07	Alginate lyase (EC 4.2.2.-);Poly-(MG)-lyase / MG-specific alginate lyase (EC 4.2.2.-);Poly(α-L-guluronate) lyase / G-specific alginate lyase (EC 4.2.2.11);Poly(β-mannuronate) lyase / M-specific alginate lyase (EC 4.2.2.3);
PL3_5	0	0	0	12	16	66	34	44	2	14	0	28	0	4	0	6	2	16	0	0	0	0	0	0	0	0	0	0	0	0	0	2	0	0	0	0	0	24	4.66667	0	0	0.333333	246	7.30432e-06	PL3's subfamily
PL7	0	0	0	14	0	4	0	2	2	8	4	4	0	2	0	0	0	0	0	2	0	0	0	0	2	4	4	0	2	4	0	0	0	0	0	2	0	4.22222	0.333333	0.333333	2.66667	0.333333	60	1.78154e-06	Alginate lyase (EC 4.2.2.-);Poly-(MG)-lyase / MG-specific alginate lyase (EC 4.2.2.-);Poly(α-L-guluronate) lyase / G-specific alginate lyase (EC 4.2.2.11);Endo-β-1,4-glucuronan lyase (EC 4.2.2.14);Oligoalginate lyase / exo-alginate lyase (EC 4.2.2.26);Poly(β-mannuronate) lyase / M-specific alginate lyase (EC 4.2.2.3);
PL8	0	0	0	0	0	0	0	0	8	0	0	0	0	0	0	0	0	0	0	0	4	6	2	0	2	0	0	34	4	20	0	0	0	2	0	0	0	0.888889	0	2	10	0.333333	82	2.43477e-06	Exo-β-1,4-glucuronan lyase (EC 4.2.2.-);Exo-hyaluronate lyase (EC 4.2.2.-);Hyaluronate lyase (EC 4.2.2.1);Xanthan lyase (EC 4.2.2.12);Chondroitin-sulfate ABC endolyase (EC 4.2.2.20);Poly(β-mannuronate) lyase / M-specific alginate lyase (EC 4.2.2.3);Chondroitin AC lyase (EC 4.2.2.5);Heparin lyase / heparin lyase I (EC 4.2.2.7);
AA11	12	2	0	0	0	0	0	0	0	0	0	0	0	0	0	0	0	0	0	0	0	0	0	0	0	0	0	0	0	0	0	0	0	0	0	0	4.66667	0	0	0	0	0	14	4.15693e-07	Lytic chitin monooxygenase (EC 1.14.99.53);
CBM10	0	6	0	0	0	0	0	0	0	0	0	0	0	0	0	0	0	0	0	0	0	0	0	0	0	0	0	0	0	0	0	0	0	0	0	0	2	0	0	0	0	0	6	1.78154e-07	Modules of approx. 50 residues. The cellulose-binding function has been demonstrated in one case.
CBM15	0	0	0	0	0	0	0	0	0	0	0	0	0	0	0	0	0	0	0	0	0	0	4	0	0	0	0	0	0	0	0	0	0	0	0	0	0	0	0	0.666667	0	0	4	1.18769e-07	Binding to xylan and xylooligosaccharides has been demonstrated in the case of Xyn10C of Cellvibrio mixtus.
CBM19	0	2	0	0	0	0	0	0	0	0	0	0	0	0	0	2	0	0	0	0	0	0	0	0	0	0	0	0	0	0	0	0	0	0	0	0	0.666667	0	0.333333	0	0	0	4	1.18769e-07	Modules of 60-70 residues with chitin-binding function.
CBM25	0	0	2	0	0	0	0	0	0	0	0	0	4	0	0	2	0	0	4	2	0	0	0	0	0	0	0	10	0	6	0	0	0	0	0	0	0.666667	0	1	1	2.66667	0	30	8.9077e-07	Starch-binding function demonstrated in one case.
CBM27	0	0	0	0	0	0	0	0	0	0	0	0	0	0	0	0	0	0	0	0	0	0	0	0	0	0	0	24	24	8	0	0	0	0	0	0	0	0	0	0	9.33333	0	56	1.66277e-06	Mannan-binding function demonstrated in two cases
CBM28	0	0	0	12	10	8	16	18	8	14	16	28	12	6	0	0	0	0	0	0	0	0	0	0	0	0	0	0	0	0	0	0	0	0	0	0	0	14.4444	3	0	0	0	148	4.39447e-06	The module from the endo-1,4-glucanase of Bacillus sp. 1139 binds to non-crystalline cellulose, cellooligosaccharides, and β-(1,3)(1,4)-glucans
CBM31	0	0	0	6	6	10	20	10	10	0	6	6	0	0	0	0	0	0	8	2	4	0	2	8	12	8	6	16	22	8	0	0	0	0	0	0	0	8.22222	0	4	12	0	170	5.0477e-06	Binding to β-1,3-xylan has been demonstrated for the C-terminal module of the β-1,3-xylanase of Alcaligenes sp. XY234.
CBM43	0	0	0	0	0	0	0	0	0	0	0	0	0	0	0	0	0	0	0	0	0	0	0	0	4	0	2	0	2	4	0	0	0	0	0	0	0	0	0	0	2	0	12	3.56308e-07	Modules of approx. 90-100 residues found at the C-terminus of GH17 or GH72 enzymatic modules and also sometimes isolated. CBM43 modules sometimes carry a C-terminal membrane anchor. The β-1,3-glucan binding function has been demonstrated with the olive pollen protein Ole e 10.
CBM58	0	0	0	0	0	0	0	0	0	0	0	0	0	0	0	0	0	0	12	4	6	2	0	0	0	0	0	0	0	0	0	0	0	0	0	0	0	0	0	4	0	0	24	7.12616e-07	The CBM58 module of the Bacteroides thetaiotaomicron SusG protein has been shown to bind maltoheptaose
CBM62	0	0	0	36	24	56	68	54	108	80	78	138	56	24	24	60	8	22	6	0	0	0	0	0	0	0	4	0	6	0	0	0	0	0	0	0	0	71.3333	32.3333	1	1.66667	0	852	2.52979e-05	The CBM62 module of Clostridium thermocellum Cthe_2193 protein binds galactose moieties found on xyloglucan, arabinogalactan and galactomannan.
CBM65	0	0	0	0	0	0	0	0	0	0	2	8	0	0	0	0	0	8	0	0	0	0	0	0	0	0	0	0	0	0	0	0	0	0	0	0	0	1.11111	1.33333	0	0	0	18	5.34462e-07	CBM65A and CBM65B, derived from Eubacterium cellulosolvens endoglucanase EcCel5A, bind to a range of β-glucans but, uniquely, display significant preference for xyloglucan
CBM68	0	0	0	0	0	0	0	0	0	0	0	0	0	0	0	4	6	0	0	0	0	0	0	0	0	0	4	0	0	0	0	0	0	0	0	0	0	0	1.66667	0	0.666667	0	14	4.15693e-07	Binding to maltotriose and maltotetraose shown for the pullulanase of Anoxybacillus sp. LM18-11. Binding function derived from crystal structure and deletion of the CBM, which showed reduced specific activity and increased Km value compared to the wild type enzyme.
CBM72	0	0	0	0	0	0	0	0	0	0	0	0	0	0	0	0	4	0	0	0	0	0	0	0	0	0	0	0	0	0	0	0	0	0	0	0	0	0	0.666667	0	0	0	4	1.18769e-07	Modules of 130-180 residues found at the C-terminus glycoside hydrolases from various families, sometimes as tandem repeats. The CBM72 found on an endoglucanase from an uncultivated microorganism was found to bind a broad spectrum of polysaccharides including soluble and insoluble cellulose, β-1,3/1,4-mixed linked glucans, xylan, and β-mannan [PMID=26765840].
CBM74	0	2	2	0	2	0	0	0	0	2	0	0	0	0	0	0	0	0	0	0	0	0	0	0	6	0	2	44	22	52	0	0	0	0	0	0	1.33333	0.444444	0	0	21	0	134	3.97877e-06	Modules of approx. 300 residues appended to several α-amylases. The starch-binding function has been demonstrated for the CBM74 appended to the GH13 α-amylase of Microbacterium aureum B8.A
CBM75	0	0	0	0	0	2	0	0	2	0	0	0	0	0	0	0	0	0	0	0	0	0	0	0	0	0	0	0	0	0	0	0	0	0	0	0	0	0.444444	0	0	0	0	4	1.18769e-07	Modules of 290 residues appended to GH43_16 enzymes. So far found exclusively in Ruminococci. The xyloglucan-binding function was demonstrated for the R. flavefaciens protein.
CBM76	0	0	0	0	0	0	0	0	0	0	0	0	0	0	0	0	0	0	0	0	2	0	0	0	0	0	2	0	0	0	0	0	0	0	0	0	0	0	0	0.333333	0.333333	0	4	1.18769e-07	Modules of approx. 170 residues appended to GH44 enzymes. So far found exclusively in Ruminococci. Broad specificity binding to β-glucans demontsrated for the R. flavefaciens module, which binds xyloglucan, glucomannan, and barley β-glucan.
CBM78	0	0	0	0	0	0	0	0	0	0	0	0	0	0	0	0	0	2	0	0	0	0	4	0	0	0	0	6	0	0	0	0	0	0	0	0	0	0	0.333333	0.666667	1	0	12	3.56308e-07	Modules of approx. 150 residues appended to the C-terminus of GH5 and GH26 enzymes. So far found exclusively in Ruminococcal enzymes. The R. flavefaciens module has been shown to bind decorated β-1,4-glucans with a preference for xyloglucan.
CBM80	0	0	0	0	0	0	0	0	0	0	0	0	0	0	0	0	0	0	2	0	0	0	0	4	0	0	0	0	0	0	0	0	0	0	0	0	0	0	0	1	0	0	6	1.78154e-07	Modules of approx. 90 residues found so far only in ruminococcal enzymes of families GH5 or GH26. Broad specificity for β-glycans (xyloglucan, glucomannan, galactomannan, barley β-glucan).
CBM82	2	0	0	0	0	0	0	0	0	0	0	0	0	0	8	0	0	0	0	0	0	0	0	0	2	0	0	0	0	0	0	0	0	0	0	0	0.666667	0	1.33333	0	0.333333	0	12	3.56308e-07	The boundaries, structure and starch-binding function of the CBM82 module of Eubacterium rectale Amy13K have been reported by Cockburn and coworkers in Molec. Microbiol. (2017) (PMID=29139580)
CBM83	0	0	0	0	0	0	0	0	0	0	0	0	0	0	0	0	0	0	2	0	0	0	0	0	0	0	0	0	0	0	0	0	0	0	0	0	0	0	0	0.333333	0	0	2	5.93847e-08	The boundaries, structure and starch-binding function of the CBM83 module of Eubacterium rectale Amy13K have been reported by Cockburn and coworkers in Molec. Microbiol. (2017) (PMID=29139580)
CBM86	0	0	0	0	0	0	0	0	0	0	0	0	0	0	0	0	0	0	0	0	0	0	0	0	0	8	0	0	0	0	0	0	0	0	0	0	0	0	0	0	1.33333	0	8	2.37539e-07	-
CBM95	0	0	0	6	4	14	10	6	14	18	14	12	0	2	0	10	2	4	0	0	0	0	0	0	0	0	0	0	0	0	0	0	0	0	0	0	0	10.8889	3	0	0	0	116	3.44431e-06	pectic rhamnogalacturonan-I binding
CBM97	0	0	2	10	2	34	14	10	22	10	2	60	10	0	4	8	10	6	12	0	0	6	0	0	0	2	2	14	4	18	0	0	0	0	0	0	0.666667	18.2222	6.33333	3	6.66667	0	262	7.77939e-06	polygalacturonic acid binding
GH111	2	2	6	2	8	6	2	4	0	0	0	0	0	0	20	0	0	0	2	8	12	10	2	0	14	2	34	24	24	32	0	0	0	0	0	0	3.33333	2.44444	3.33333	5.66667	21.6667	0	216	6.41355e-06	Keratan sulfate endo-β-N-acetylglucosaminidase / keratanase II (EC 3.2.1.-);
GH13_25	0	0	0	8	0	0	0	0	0	0	0	0	0	0	0	2	2	0	0	0	0	0	0	0	0	0	0	0	0	0	0	0	0	0	0	0	0	0.888889	0.666667	0	0	0	12	3.56308e-07	GH13's subfamily
GH13_34	12	8	8	2	0	0	2	0	4	4	0	14	0	0	2	0	0	0	0	0	0	0	0	0	0	0	0	0	0	0	0	0	0	0	0	0	9.33333	2.88889	0.333333	0	0	0	56	1.66277e-06	GH13's subfamily
GH130_12	0	0	0	0	0	0	0	0	0	0	0	0	0	0	0	0	0	0	0	0	0	0	0	0	0	2	0	0	0	0	0	0	0	0	0	0	0	0	0	0	0.333333	0	2	5.93847e-08	GH130's subfamily
GH130_15	10	0	20	2	0	2	4	0	2	2	0	0	2	0	0	0	0	0	0	2	0	16	0	0	8	2	12	22	6	2	0	0	0	0	0	0	10	1.33333	0.333333	3	8.66667	0	114	3.38493e-06	GH130's subfamily
GH132	0	0	0	0	0	0	0	0	0	0	0	0	0	0	0	4	4	0	0	0	0	0	0	0	0	0	0	0	0	0	0	0	0	0	0	0	0	0	1.33333	0	0	0	8	2.37539e-07	Exo-β-1,3-glucanase (EC 3.2.1.58);
GH134	0	0	0	0	0	0	0	0	0	0	0	0	0	0	0	0	0	4	0	0	0	0	0	0	0	0	0	0	0	0	0	0	0	0	0	0	0	0	0.666667	0	0	0	4	1.18769e-07	Endo-β-1,4-mannanase (EC 3.2.1.78);
GH16_10	0	0	0	20	16	18	22	32	18	4	8	4	6	6	4	10	0	6	0	4	0	0	0	0	0	0	10	0	0	2	0	0	0	0	0	0	0	15.7778	5.33333	0.666667	2	0	190	5.64154e-06	GH16's subfamily
GH16_16	0	0	0	0	0	0	0	0	0	0	0	0	2	0	0	0	0	0	0	0	0	0	0	0	0	0	0	0	0	0	0	0	0	0	0	0	0	0	0.333333	0	0	0	2	5.93847e-08	GH16's subfamily
GH16_18	2	0	2	4	0	0	0	4	0	0	0	0	0	0	0	0	0	0	0	0	0	0	0	0	0	0	0	0	0	0	0	0	0	0	0	0	1.33333	0.888889	0	0	0	0	12	3.56308e-07	GH16's subfamily
GH16_19	0	0	0	0	0	0	0	0	0	0	0	0	0	0	0	0	0	0	0	0	0	0	2	2	0	2	2	0	4	0	0	0	0	0	0	0	0	0	0	0.666667	1.33333	0	12	3.56308e-07	GH16's subfamily
GH16_2	0	0	0	0	0	2	0	0	0	0	0	0	0	0	0	0	8	0	2	0	0	0	0	2	0	0	0	0	0	0	0	0	0	0	0	0	0	0.222222	1.33333	0.666667	0	0	14	4.15693e-07	GH16's subfamily
GH16_20	0	0	0	0	0	0	0	0	0	0	0	0	0	0	2	0	6	0	0	0	0	0	0	0	0	0	0	0	0	0	0	0	0	0	0	0	0	0	1.33333	0	0	0	8	2.37539e-07	GH16's subfamily
GH16_22	0	0	0	0	2	0	4	2	0	2	0	2	0	0	0	0	0	0	0	0	0	0	0	0	0	0	0	0	0	0	0	0	0	0	0	0	0	1.33333	0	0	0	0	12	3.56308e-07	GH16's subfamily
GH16_27	0	0	0	8	0	4	0	2	0	4	0	2	0	0	0	4	2	0	0	0	0	0	0	0	0	0	0	0	0	0	0	0	0	0	0	0	0	2.22222	1	0	0	0	26	7.72001e-07	GH16's subfamily
GH16_4	0	0	0	0	0	2	2	0	8	0	0	0	0	0	0	0	0	0	0	0	0	0	0	0	0	0	0	0	0	0	0	0	0	0	0	0	0	1.33333	0	0	0	0	12	3.56308e-07	GH16's subfamily
GH30_10	0	0	0	0	0	2	6	2	8	28	36	10	0	0	0	0	0	0	0	0	0	0	0	0	10	4	16	16	20	4	0	0	0	0	0	0	0	10.2222	0	0	11.6667	0	162	4.81016e-06	GH30's subfamily
GH30_9	2	10	10	0	0	0	0	0	0	0	0	2	0	4	0	6	16	0	0	0	0	0	2	2	2	0	2	0	0	0	0	0	0	0	0	0	7.33333	0.222222	4.33333	0.666667	0.666667	0	58	1.72216e-06	GH30's subfamily
GH31_10	0	0	0	0	0	0	0	0	0	0	0	0	0	6	0	0	0	0	2	0	0	0	20	0	0	0	0	0	0	0	0	0	0	0	0	0	0	0	1	3.66667	0	0	28	8.31386e-07	GH31's subfamily
GH31_16	0	0	0	0	0	0	0	0	0	0	0	0	0	0	0	0	0	0	0	0	0	2	0	0	0	0	0	0	0	0	0	0	0	0	0	0	0	0	0	0.333333	0	0	2	5.93847e-08	GH31's subfamily
GH31_6	0	0	0	0	0	0	0	0	0	0	2	2	0	0	0	0	0	0	0	0	0	0	0	0	0	0	0	0	0	0	0	0	0	0	0	0	0	0.444444	0	0	0	0	4	1.18769e-07	GH31's subfamily
GH34	0	0	0	0	0	0	0	2	0	2	0	0	0	0	0	0	0	0	0	0	0	0	0	0	0	0	0	0	0	0	0	0	0	0	0	0	0	0.444444	0	0	0	0	4	1.18769e-07	Exo-α-sialidase (EC 3.2.1.18);
GH43_14	0	0	0	2	0	0	2	8	0	0	0	0	0	0	4	2	2	0	0	0	0	0	0	0	0	0	0	0	0	0	0	0	0	0	0	0	0	1.33333	1.33333	0	0	0	20	5.93847e-07	GH43's subfamily
GH43_21	0	0	0	20	16	34	34	24	28	48	16	48	4	6	8	0	0	6	0	0	0	0	0	0	0	0	0	8	6	4	0	0	0	0	0	0	0	29.7778	4	0	3	0	310	9.20463e-06	GH43's subfamily
GH43_23	0	0	0	2	0	0	0	0	0	0	0	0	0	0	0	0	0	0	0	0	0	0	0	0	0	0	4	54	28	20	0	0	0	0	0	0	0	0.222222	0	0	17.6667	0	108	3.20677e-06	GH43's subfamily
GH43_25	0	0	0	0	0	0	0	0	0	0	0	0	0	0	0	0	2	0	0	0	0	0	0	0	0	0	0	0	0	0	0	0	0	0	0	0	0	0	0.333333	0	0	0	2	5.93847e-08	GH43's subfamily
GH45	0	0	0	14	8	20	16	12	4	4	26	4	2	0	0	0	0	6	0	0	0	0	0	0	2	0	2	38	4	4	0	0	0	0	0	0	0	12	1.33333	0	8.33333	0	166	4.92893e-06	Glucomannan-specific endo-β-1,4-glucanase (EC 3.2.1.-);Xyloglucan-specific endo-β-1,4-glucanase / endo-xyloglucanase (EC 3.2.1.151);Endo-β-1,4-glucanase (EC 3.2.1.4);
GH45_1	0	0	0	8	4	24	26	20	0	8	16	14	6	14	2	4	0	4	2	2	0	0	6	0	0	0	0	0	0	0	0	0	0	0	0	0	0	13.3333	5	1.66667	0	0	160	4.75077e-06	GH45's subfamily
GH5_11	36	12	20	16	8	14	16	12	4	8	4	4	4	0	0	2	0	0	0	0	0	0	0	0	0	0	0	0	0	0	0	0	0	0	0	0	22.6667	9.55556	1	0	0	0	160	4.75077e-06	GH5's subfamily
GH5_16	20	0	4	4	2	4	14	2	2	4	6	2	0	0	2	0	0	0	2	2	2	4	2	2	52	56	62	32	32	12	0	0	0	0	0	0	8	4.44444	0.333333	2.33333	41	0	326	9.6797e-06	GH5's subfamily
GH5_23	0	2	0	0	2	0	0	0	0	0	0	0	0	2	0	2	0	2	0	0	0	0	0	0	0	0	0	0	0	2	0	0	0	0	0	0	0.666667	0.222222	1	0	0.333333	0	12	3.56308e-07	GH5's subfamily
GH5_32	0	0	0	0	0	0	0	0	0	0	0	0	0	0	0	0	2	0	0	0	0	0	0	0	0	0	0	0	0	0	0	0	0	0	0	0	0	0	0.333333	0	0	0	2	5.93847e-08	GH5's subfamily
GH5_33	0	0	0	0	0	0	0	0	0	0	0	0	0	0	0	0	0	0	0	0	0	0	0	4	0	0	0	0	0	0	0	0	0	0	0	0	0	0	0	0.666667	0	0	4	1.18769e-07	GH5's subfamily
GH5_35	0	0	0	18	0	8	2	10	8	12	2	0	6	0	2	0	0	0	0	0	0	0	0	0	0	0	0	0	0	0	0	0	0	0	0	0	0	6.66667	1.33333	0	0	0	68	2.01908e-06	GH5's subfamily
GH5_43	0	0	0	2	0	0	0	0	0	0	0	0	0	0	0	0	0	0	0	0	0	0	16	0	0	0	0	0	0	0	0	0	0	0	0	0	0	0.222222	0	2.66667	0	0	18	5.34462e-07	GH5's subfamily
GH5_49	0	0	0	0	0	0	0	0	0	0	0	0	0	0	0	0	0	0	0	0	0	0	0	0	0	0	2	0	2	0	0	0	0	0	0	0	0	0	0	0	0.666667	0	4	1.18769e-07	GH5's subfamily
GH5_50	0	0	0	0	0	0	0	0	0	0	0	0	0	0	0	0	0	0	0	0	0	0	0	0	0	2	0	2	0	6	0	0	0	0	0	0	0	0	0	0	1.66667	0	10	2.96923e-07	GH5's subfamily
GH5_52	0	0	0	0	0	0	0	0	0	0	0	0	0	0	0	0	0	0	0	0	0	18	2	0	0	0	4	8	20	8	0	0	0	0	0	0	0	0	0	3.33333	6.66667	0	60	1.78154e-06	GH5's subfamily
GH5_56	0	2	4	2	2	4	2	0	2	0	4	4	2	0	4	0	0	0	0	0	0	0	0	0	0	0	0	0	0	0	0	0	0	0	0	0	2	2.22222	1	0	0	0	32	9.50155e-07	GH5's subfamily
GH5_9	0	0	0	0	0	0	0	0	0	0	0	0	0	0	4	0	0	0	0	0	0	0	6	0	0	0	0	0	0	0	0	0	0	0	0	0	0	0	0.666667	1	0	0	10	2.96923e-07	GH5's subfamily
GH51_7	0	2	0	0	0	0	0	0	0	0	0	0	4	0	2	2	2	0	0	0	0	0	0	0	4	4	4	2	6	2	0	0	0	0	0	0	0.666667	0	1.66667	0	3.66667	0	34	1.00954e-06	GH51's subfamily
GH68_1	0	0	0	0	6	2	4	0	2	0	0	0	10	0	0	0	0	2	0	0	0	0	0	4	0	0	0	0	0	0	0	0	0	0	0	0	0	1.55556	2	0.666667	0	0	30	8.9077e-07	GH68's subfamily
GH7	0	0	0	0	0	0	6	8	0	0	0	0	0	0	0	0	0	4	0	0	0	0	0	0	0	2	0	0	4	0	0	0	0	0	0	0	0	1.55556	0.666667	0	1	0	24	7.12616e-07	Chitosanase (EC 3.2.1.132);Reducing end-acting cellobiohydrolase (EC 3.2.1.176);Endo-β-1,4-glucanase (EC 3.2.1.4);Lichenase / endo-β-1,3-1,4-glucanase (EC 3.2.1.73);
GH90	0	0	0	0	0	0	0	0	0	2	0	0	8	0	6	2	0	0	8	2	2	2	6	0	0	0	0	0	0	0	0	0	0	0	0	0	0	0.222222	2.66667	3.33333	0	0	38	1.12831e-06	Endo-α-L-1,3-rhamnosidase (EC 3.2.1.-);
GT103	38	0	4	2	2	0	0	0	0	0	0	0	0	0	0	0	0	0	0	0	0	0	0	0	0	0	0	0	0	0	0	0	0	0	0	0	14	0.444444	0	0	0	0	46	1.36585e-06	LPS β-N-acetylglucosaminyltransferase (EC 2.4.1.56);
GT110	0	0	0	0	4	4	2	0	8	0	0	0	0	0	0	0	0	0	0	0	0	0	0	0	0	0	0	0	0	0	0	0	0	0	0	0	0	2	0	0	0	0	18	5.34462e-07	UDP-D-xylose:ribitol-5-phosphate β-1,4-xylosyltransferase (EC 2.4.2.-);
GT16	0	0	0	0	0	0	0	0	0	0	0	0	0	0	0	0	0	0	4	2	2	2	2	0	12	8	2	4	8	8	0	0	0	0	0	0	0	0	0	2	7	0	54	1.60339e-06	α-1,6-mannosyl-glycoprotein 2-β-N-acetylglucosaminyltransferase (EC 2.4.1.143);
GT18	6	2	0	0	0	0	0	0	0	0	0	0	0	0	0	0	0	0	0	0	0	0	0	0	0	0	0	0	0	0	0	0	0	0	0	0	2.66667	0	0	0	0	0	8	2.37539e-07	α-1,6-mannosyl-glycoprotein 6-β-N-acetylglucosaminyltransferase (EC 2.4.1.155);
GT37	0	0	0	0	0	0	0	0	0	0	0	0	0	0	0	0	0	0	0	0	0	0	0	0	0	0	0	2	0	2	0	0	0	0	0	0	0	0	0	0	0.666667	0	4	1.18769e-07	Arabinosyl α-1,2-L-fucosyltransferase (EC 2.4.1.-);GDP-L-Fuc: galactoside α-1,2-L-fucosyltransferase (EC 2.4.1.69);
GT38	0	14	2	0	0	0	0	0	0	0	0	0	2	0	0	2	0	0	0	0	0	0	0	0	2	0	0	0	2	16	0	0	0	0	0	0	5.33333	0	0.666667	0	3.33333	0	40	1.18769e-06	CMP-NeuAc: α-2,8-polysialyltransferase (EC 2.4.3.-);CMP-NeuAc: alternating α-2,8/2,9-polysialyltransferase (EC 2.4.3.-);
GT42	12	8	10	0	6	4	6	4	8	2	6	8	0	0	0	0	0	0	0	4	6	6	4	0	6	8	2	14	14	10	0	0	0	0	0	0	10	4.88889	0	3.33333	9	0	148	4.39447e-06	CMP-Neu5Ac: α-N-acetylgalactoside α-2,6-sialyltransferase (EC 2.4.3.3);CMP-Neu5Ac: β-galactoside α-2,3-sialyltransferase (EC 2.4.3.4);CMP-Neu5Ac: N-acetyllactoside α-2,3-sialyltransferase (EC 2.4.3.6);CMP-Neu5Ac : α-N-acetylneuraminate α-2,8-sialyltransferase (EC 2.4.3.8);
GT49	0	0	0	2	2	0	0	0	10	4	2	0	0	4	4	6	78	2	0	0	0	0	0	0	0	0	0	0	0	0	0	0	0	0	0	0	0	2.22222	15.6667	0	0	0	114	3.38493e-06	α-glucuronyltransferase (EC 2.4.1.-);
GT54	0	0	0	4	4	8	0	14	10	2	2	10	0	4	0	0	0	2	0	2	0	0	0	0	0	0	0	0	0	0	0	0	0	0	0	0	0	6	1	0.333333	0	0	62	1.84093e-06	α-1,3-mannosyl-glycoprotein 4-β-N-acetylglucosaminyltransferase (EC 2.4.1.145);UDP-GlcNAc: GnGnGnGn tetraantennary-glycoprotein β-1,4-N-acetylglucosaminyltransferase (EC 2.4.1.201);
GT65	0	0	0	0	0	4	4	14	2	0	28	4	0	0	0	0	0	0	0	8	0	0	2	0	0	0	0	0	0	0	0	0	0	0	0	0	0	6.22222	0	1.66667	0	0	66	1.95969e-06	GDP-L-Fuc: protein O-α-L-fucosyltransferase (EC 2.4.1.221);
GT67	0	2	0	2	0	0	2	0	0	0	0	2	2	2	2	0	0	2	0	0	0	0	0	0	0	0	0	0	0	0	0	0	0	0	0	0	0.666667	0.666667	1.33333	0	0	0	16	4.75077e-07	UDP-Gal: phosphoglycan β-1,3-galactosyltransferase (EC 2.4.1.-);UDP-GlcNAc: β-1,2-N-acetylglucosaminyltransferase (EC 2.4.1.-);UDP-GlcNAc: N-acetyllactoside β-1,3-N-acetylglucosaminyltransferase (EC 2.4.1.149);
GT68	16	8	10	48	26	46	40	76	24	42	40	60	26	22	10	2	0	12	4	0	0	0	62	62	0	0	2	4	2	2	0	0	0	0	0	0	11.3333	44.6667	12	21.3333	1.66667	0	646	1.91813e-05	GDP-L-Fuc: protein O-α-L-fucosyltransferase (EC 2.4.1.221);
GT80	0	0	0	2	4	0	0	0	0	0	0	0	0	0	0	0	0	4	0	0	0	0	0	0	0	0	0	4	0	0	0	0	0	0	0	0	0	0.666667	0.666667	0	0.666667	0	14	4.15693e-07	CMP-NeuAc: β-galactoside α-2,6-sialyltransferase (EC 2.4.3.1);CMP-Neu5Ac: β-galactoside α-2,3-sialyltransferase (EC 2.4.3.4);
GT88	6	2	2	0	0	0	0	0	0	0	0	0	0	0	0	0	0	0	2	2	6	2	2	0	0	0	0	2	0	0	0	0	0	0	0	0	3.33333	0	0	2.33333	0.333333	0	26	7.72001e-07	UDP-Glc: protein α-glucosyltransferase (EC 2.4.1.-);
GT91	24	4	4	0	0	0	0	0	0	0	0	0	0	0	0	6	0	8	0	0	0	0	10	0	0	0	0	0	0	0	0	0	0	0	0	0	10.6667	0	2.33333	1.66667	0	0	56	1.66277e-06	β-1,2-mannobiose phosphorylase (EC 2.4.1.339);GDP-α-D-Manp: β-1,2-D-mannosyltransferase (EC 2.4.1.374);
GT93	0	0	0	0	0	0	0	0	0	0	0	0	0	0	0	0	0	0	0	0	0	0	6	0	0	0	0	0	0	0	0	0	0	0	0	0	0	0	0	1	0	0	6	1.78154e-07	α-glucuronyltransferase (EC 2.4.1.-);
GT98	0	0	0	12	10	0	2	6	2	0	0	2	8	4	0	0	6	0	0	0	0	0	2	0	0	0	0	14	8	16	0	0	0	0	0	0	0	3.77778	3	0.333333	6.33333	0	92	2.7317e-06	Dol-P-Man : protein [tryptophan] α-C-mannosyltransferase (EC 2.4.1.-);
PL1_1	0	0	8	0	0	0	0	0	4	2	0	0	2	2	2	2	0	2	0	0	0	0	0	0	0	8	0	18	2	8	0	0	0	0	0	0	2.66667	0.666667	1.66667	0	6	0	60	1.78154e-06	PL1's subfamily
PL1_11	0	0	0	18	50	74	56	78	22	28	26	48	14	4	4	10	0	14	0	0	0	0	0	0	0	0	0	12	8	0	0	0	0	0	0	0	0	44.4444	7.66667	0	3.33333	0	466	1.38366e-05	PL1's subfamily
PL1_3	0	0	0	52	30	22	20	32	16	34	24	42	4	4	6	0	0	12	0	0	0	0	0	0	0	0	0	0	0	0	0	0	0	0	0	0	0	30.2222	4.33333	0	0	0	298	8.84832e-06	PL1's subfamily
PL1_4	0	0	0	4	8	0	6	18	0	10	12	14	6	4	0	0	0	2	0	0	0	0	6	4	2	0	0	0	0	0	0	0	0	0	0	0	0	8	2	1.66667	0.333333	0	96	2.85046e-06	PL1's subfamily
PL1_5	0	2	0	114	96	236	136	168	98	52	50	140	26	16	6	8	0	84	0	0	2	0	0	0	10	2	4	16	46	34	0	0	0	0	0	0	0.666667	121.111	23.3333	0.333333	18.6667	0	1346	3.99659e-05	PL1's subfamily
PL1_7	0	0	0	14	14	12	8	6	14	8	14	6	10	0	12	6	0	4	0	0	0	0	0	2	0	0	0	10	0	0	0	0	0	0	0	0	0	10.6667	5.33333	0.333333	1.66667	0	140	4.15693e-06	PL1's subfamily
PL1_9	0	0	0	2	0	0	0	0	0	0	0	0	0	0	0	6	0	2	0	0	0	0	0	0	0	0	0	0	0	0	0	0	0	0	0	0	0	0.222222	1.33333	0	0	0	10	2.96923e-07	PL1's subfamily
PL13	6	0	0	12	6	12	4	12	16	2	2	0	0	2	0	2	2	2	4	2	0	0	0	0	4	0	0	0	2	6	0	0	0	0	0	0	2	7.33333	1.33333	1	2	0	98	2.90985e-06	Heparin lyase / heparin lyase I (EC 4.2.2.7);
PL14_1	0	0	0	2	0	0	0	2	0	0	0	2	0	0	0	0	0	0	0	0	0	0	2	0	0	0	0	0	0	2	0	0	0	0	0	0	0	0.666667	0	0.333333	0.333333	0	10	2.96923e-07	PL14's subfamily
PL14_5	0	0	0	0	0	0	0	0	0	0	0	0	0	0	0	0	0	0	2	2	2	0	12	0	0	0	0	0	0	0	0	0	0	0	0	0	0	0	0	3	0	0	18	5.34462e-07	PL14's subfamily
PL17_2	0	0	0	0	0	0	0	0	0	0	0	0	0	0	4	0	2	0	12	32	32	28	8	6	16	4	2	16	14	12	0	0	0	0	0	0	0	0	1	19.6667	10.6667	0	188	5.58216e-06	PL17's subfamily
PL2_2	0	2	0	0	0	6	2	0	0	4	36	0	0	0	0	2	24	8	0	0	2	0	0	4	0	0	0	4	0	0	0	0	0	0	0	0	0.666667	5.33333	5.66667	1	0.666667	0	94	2.79108e-06	PL2's subfamily
PL23	0	0	0	0	0	0	2	0	0	0	0	0	0	0	0	0	0	0	0	0	0	0	0	0	0	0	0	0	0	0	0	0	0	0	0	0	0	0.222222	0	0	0	0	2	5.93847e-08	Chondroitin lyase / chondroitinase (EC 4.2.2.-);
PL3	0	0	2	10	12	22	6	2	14	8	30	8	14	18	6	8	8	6	0	0	0	0	0	0	4	2	2	20	8	8	0	0	0	0	0	0	0.666667	12.4444	10	0	7.33333	0	218	6.47293e-06	Pectate lyase (EC 4.2.2.2);
PL3_1	0	0	4	70	68	162	102	90	140	68	92	80	18	14	2	2	0	52	0	0	0	0	0	0	0	2	0	32	14	26	0	0	0	0	0	0	1.33333	96.8889	14.6667	0	12.3333	0	1038	3.08206e-05	PL3's subfamily
PL3_2	2	0	0	6	4	2	8	4	0	8	0	4	2	4	0	2	8	2	0	0	0	0	0	0	0	0	0	0	0	0	0	0	0	0	0	0	0.666667	4	3	0	0	0	56	1.66277e-06	PL3's subfamily
PL3_3	0	0	0	0	0	2	0	2	0	8	2	0	0	0	0	0	0	0	0	0	0	0	0	0	0	0	0	0	0	0	0	0	0	0	0	0	0	1.55556	0	0	0	0	14	4.15693e-07	PL3's subfamily
PL3_4	0	0	0	38	32	22	18	30	12	22	6	26	8	0	4	0	0	14	0	0	0	0	0	0	0	0	0	0	0	0	0	0	0	0	0	0	0	22.8889	4.33333	0	0	0	232	6.88862e-06	PL3's subfamily
PL36	2	0	2	2	0	0	8	6	6	6	0	2	0	0	0	0	0	0	0	0	0	0	0	0	0	0	0	0	0	0	0	0	0	0	0	0	1.33333	3.33333	0	0	0	0	34	1.00954e-06	Poly(β-mannuronate) lyase / M-specific alginate lyase (EC 4.2.2.3);
PL7_1	0	0	0	2	0	2	4	0	0	0	0	0	0	0	0	0	0	0	0	0	0	0	0	0	0	0	0	4	0	0	0	0	0	0	0	0	0	0.888889	0	0	0.666667	0	12	3.56308e-07	PL7's subfamily
PL7_5	4	20	16	0	0	0	0	0	0	0	0	0	0	2	0	0	2	4	30	20	34	24	20	8	6	2	0	6	22	2	0	0	0	0	0	0	13.3333	0	1.33333	22.6667	6.33333	0	222	6.5917e-06	PL7's subfamily
PL8_1	4	0	0	0	0	0	0	0	0	0	0	2	0	0	0	0	0	2	0	0	0	2	0	0	0	0	0	0	0	0	0	0	0	0	0	0	1.33333	0.222222	0.333333	0.333333	0	0	10	2.96923e-07	PL8's subfamily
PL8_4	0	0	0	0	0	0	0	0	0	0	0	0	0	0	0	0	2	0	2	0	0	0	6	4	0	0	0	0	0	0	0	0	0	0	0	0	0	0	0.333333	2	0	0	14	4.15693e-07	PL8's subfamily
