# Supplementary material for: Divergent microbial community and functional dynamics in mangrove sediments along a polycyclic aromatic hydrocarbons (PAHs) gradient in China
Source: Research Square preprint supplement (doi:10.21203/rs.3.rs-7178259/v1), 2025-09-17
Supplement: Supplementary file 17 [file da59062e28aa8971489fd91f.xlsx]

## Sheet: MAGs_PAHs_degrading_KOs
MAG Id	Domain	Phylum	Class	Order	Family	Genus	Species	Number of PAH-degrading KOs
MAG1	d__Bacteria	p__Actinomycetota	c__Acidimicrobiia	o__UBA5794	f__ZC4RG35	g__SZUA-217	s__Unclassified	57
MAG10	d__Bacteria	p__Bacillota_A	c__Clostridia	o__DUPQ01	f__DUPQ01	g__JAFGQE01	s__Unclassified	17
MAG100	d__Bacteria	p__Acidobacteriota	c__Vicinamibacteria	o__Vicinamibacterales	f__Unclassified	g__Unclassified	s__Unclassified	51
MAG101	d__Bacteria	p__Bacteroidota	c__Bacteroidia	o__Bacteroidales	f__VadinHA17	g__JAADHC01	s__Unclassified	34
MAG102	d__Bacteria	p__Bacteroidota	c__Bacteroidia	o__Bacteroidales	f__Prolixibacteraceae	g__Draconibacterium	s__Unclassified	34
MAG103	d__Bacteria	p__Bacteroidota	c__Bacteroidia	o__Bacteroidales	f__GCA-2748055	g__Unclassified	s__Unclassified	41
MAG104	d__Bacteria	p__Pseudomonadota	c__Gammaproteobacteria	o__Chromatiales	f__Sedimenticolaceae	g__Sva-25	s__Unclassified	30
MAG105	d__Bacteria	p__Actinomycetota	c__Acidimicrobiia	o__UBA5794	f__ZC4RG35	g__SZUA-217	s__Unclassified	42
MAG106	d__Bacteria	p__Pseudomonadota	c__Gammaproteobacteria	o__Steroidobacterales	f__Steroidobacteraceae	g__SG8-30	s__Unclassified	51
MAG107	d__Bacteria	p__Desulfobacterota	c__Desulfobacteria	o__Desulfobacterales	f__B30-G6	g__Unclassified	s__Unclassified	81
MAG108	d__Bacteria	p__Pseudomonadota	c__Alphaproteobacteria	o__Rhizobiales	f__Methyloligellaceae	g__Methyloceanibacter	s__Unclassified	62
MAG109	d__Bacteria	p__Chloroflexota	c__Anaerolineae	o__Anaerolineales	f__UBA4823	g__PFL25	s__Unclassified	64
MAG11	d__Bacteria	p__Pseudomonadota	c__Gammaproteobacteria	o__Woeseiales	f__Woeseiaceae	g__UBA1847	s__Unclassified	41
MAG110	d__Bacteria	p__Myxococcota	c__Polyangia	o__GCA-2747355	f__Unclassified	g__Unclassified	s__Unclassified	67
MAG111	d__Bacteria	p__Chloroflexota	c__Anaerolineae	o__Anaerolineales	f__UBA4823	g__PFL25	s__Unclassified	56
MAG112	d__Bacteria	p__Bacteroidota	c__Bacteroidia	o__Bacteroidales	f__GCA-2748055	g__GCA-2748055	s__Unclassified	40
MAG113	d__Bacteria	p__Pseudomonadota	c__Alphaproteobacteria	o__Rhizobiales	f__Rhizobiaceae	g__Salaquimonas	s__Unclassified	48
MAG114	d__Bacteria	p__Chloroflexota	c__Anaerolineae	o__Anaerolineales	f__UBA4823	g__PFL25	s__Unclassified	59
MAG115	d__Bacteria	p__Pseudomonadota	c__Gammaproteobacteria	o__UBA9214	f__UBA9214	g__Unclassified	s__Unclassified	34
MAG116	d__Bacteria	p__Pseudomonadota	c__Alphaproteobacteria	o__Rhizobiales	f__Rhizobiaceae	g__BOKV01	s__Unclassified	86
MAG117	d__Bacteria	p__Actinomycetota	c__Actinomycetia	o__Nanopelagicales	f__CAIYMF01	g__Unclassified	s__Unclassified	35
MAG118	d__Bacteria	p__Pseudomonadota	c__Alphaproteobacteria	o__Rhizobiales	f__Aestuariivirgaceae	g__Anderseniella	s__Unclassified	71
MAG119	d__Bacteria	p__Bacteroidota	c__Bacteroidia	o__Flavobacteriales	f__Flavobacteriaceae	g__Lutimonas	s__Unclassified	42
MAG12	d__Bacteria	p__Actinomycetota	c__Acidimicrobiia	o__UBA5794	f__ZC4RG35	g__Unclassified	s__Unclassified	59
MAG120	d__Bacteria	p__Pseudomonadota	c__Alphaproteobacteria	o__Rhizobiales	f__Methyloligellaceae	g__Methyloceanibacter	s__Unclassified	82
MAG121	d__Bacteria	p__Chloroflexota	c__Anaerolineae	o__Promineofilales	f__Promineofilaceae	g__UBA11865	s__Unclassified	81
MAG122	d__Bacteria	p__Actinomycetota	c__Actinomycetia	o__Actinomycetales	f__Dermatophilaceae	g__Phycicoccus	s__Unclassified	67
MAG123	d__Bacteria	p__Actinomycetota	c__Acidimicrobiia	o__UBA5794	f__ZC4RG35	g__SZUA-217	s__Unclassified	50
MAG124	d__Bacteria	p__Chloroflexota	c__Anaerolineae	o__Anaerolineales	f__UBA4823	g__PFL25	s__PFL25 sp020349245	62
MAG125	d__Bacteria	p__Pseudomonadota	c__Gammaproteobacteria	o__Woeseiales	f__Woeseiaceae	g__UBA1847	s__Unclassified	41
MAG126	d__Bacteria	p__Pseudomonadota	c__Alphaproteobacteria	o__Rhizobiales	f__Aestuariivirgaceae	g__Anderseniella	s__Unclassified	69
MAG127	d__Bacteria	p__Pseudomonadota	c__Gammaproteobacteria	o__Steroidobacterales	f__Steroidobacteraceae	g__Unclassified	s__Unclassified	59
MAG128	d__Bacteria	p__Bacteroidota	c__Bacteroidia	o__Bacteroidales	f__VadinHA17	g__SR-FBR-E99	s__SR-FBR-E99 sp006227095	40
MAG129	d__Bacteria	p__Pseudomonadota	c__Gammaproteobacteria	o__Woeseiales	f__Woeseiaceae	g__UBA1847	s__Unclassified	52
MAG13	d__Bacteria	p__Pseudomonadota	c__Gammaproteobacteria	o__Burkholderiales	f__Burkholderiaceae_B	g__G020354665	s__G020354665 sp020354665	103
MAG130	d__Bacteria	p__Planctomycetota	c__Planctomycetia	o__Pirellulales	f__Pirellulaceae	g__JAGQPK01	s__Unclassified	60
MAG131	d__Bacteria	p__Bacteroidota	c__Bacteroidia	o__Flavobacteriales	f__Flavobacteriaceae	g__Robiginitalea	s__Unclassified	35
MAG132	d__Bacteria	p__Chloroflexota	c__Anaerolineae	o__Anaerolineales	f__UBA4823	g__DSOS01	s__Unclassified	92
MAG133	d__Bacteria	p__Pseudomonadota	c__Alphaproteobacteria	o__Rhizobiales	f__Aestuariivirgaceae	g__Anderseniella	s__Unclassified	52
MAG134	d__Bacteria	p__Actinomycetota	c__Actinomycetia	o__Mycobacteriales	f__Mycobacteriaceae	g__Mycobacterium	s__Unclassified	93
MAG135	d__Bacteria	p__Actinomycetota	c__Thermoleophilia	o__Solirubrobacterales	f__70-9	g__JAJKHV01	s__Unclassified	44
MAG136	d__Bacteria	p__Actinomycetota	c__Acidimicrobiia	o__Acidimicrobiales	f__Ilumatobacteraceae	g__Ilumatobacter	s__Unclassified	79
MAG137	d__Bacteria	p__Pseudomonadota	c__Gammaproteobacteria	o__Woeseiales	f__Woeseiaceae	g__UBA1847	s__Unclassified	51
MAG138	d__Bacteria	p__Pseudomonadota	c__Gammaproteobacteria	o__Arenicellales	f__BMS3Bbin11	g__BMS3Bbin11	s__Unclassified	34
MAG139	d__Bacteria	p__Desulfobacterota	c__Desulfobacteria	o__Desulfobacterales	f__UBA11574	g__UBA11574	s__UBA11574 sp003486165	55
MAG14	d__Bacteria	p__Pseudomonadota	c__Gammaproteobacteria	o__Steroidobacterales	f__Steroidobacteraceae	g__Unclassified	s__Unclassified	59
MAG140	d__Bacteria	p__Chloroflexota	c__Anaerolineae	o__Anaerolineales	f__UBA4823	g__PFL25	s__Unclassified	59
MAG141	d__Bacteria	p__Actinomycetota	c__Acidimicrobiia	o__UBA5794	f__ZC4RG35	g__Unclassified	s__Unclassified	48
MAG142	d__Bacteria	p__Pseudomonadota	c__Alphaproteobacteria	o__Rhizobiales	f__Methyloligellaceae	g__Methyloceanibacter	s__Unclassified	42
MAG143	d__Archaea	p__Thermoproteota	c__Nitrososphaeria	o__Nitrososphaerales	f__Nitrosopumilaceae	g__JACEMX01	s__Unclassified	21
MAG144	d__Bacteria	p__Actinomycetota	c__Acidimicrobiia	o__Acidimicrobiales	f__Microtrichaceae	g__JAAEPF01	s__Unclassified	62
MAG145	d__Bacteria	p__Actinomycetota	c__Actinomycetia	o__Nanopelagicales	f__GCA-2699445	g__Unclassified	s__Unclassified	35
MAG146	d__Bacteria	p__Bacteroidota	c__Bacteroidia	o__Flavobacteriales	f__Flavobacteriaceae	g__Lutimonas	s__Unclassified	20
MAG147	d__Bacteria	p__Pseudomonadota	c__Gammaproteobacteria	o__Burkholderiales	f__Burkholderiaceae_A	g__JADJWR01	s__Unclassified	74
MAG148	d__Bacteria	p__Chloroflexota	c__Anaerolineae	o__Anaerolineales	f__UBA4823	g__DSOS01	s__Unclassified	70
MAG149	d__Bacteria	p__Bacteroidota	c__Bacteroidia	o__Flavobacteriales	f__Flavobacteriaceae	g__Robiginitalea	s__Unclassified	37
MAG15	d__Bacteria	p__Bacteroidota	c__Bacteroidia	o__Bacteroidales	f__VadinHA17	g__LD21	s__Unclassified	37
MAG150	d__Bacteria	p__Actinomycetota	c__Acidimicrobiia	o__UBA5794	f__ZC4RG35	g__Unclassified	s__Unclassified	63
MAG151	d__Bacteria	p__Desulfobacterota_F	c__Desulfuromonadia	o__Desulfuromonadales	f__BM103	g__JAFDBW01	s__Unclassified	37
MAG152	d__Bacteria	p__Bacteroidota	c__Bacteroidia	o__Flavobacteriales	f__Flavobacteriaceae	g__Robiginitalea	s__Unclassified	38
MAG153	d__Bacteria	p__Pseudomonadota	c__Gammaproteobacteria	o__Chromatiales	f__Sedimenticolaceae	g__Unclassified	s__Unclassified	26
MAG154	d__Bacteria	p__Desulfobacterota	c__Desulfobulbia	o__Desulfobulbales	f__Desulfocapsaceae	g__JABDQA01	s__Unclassified	62
MAG155	d__Archaea	p__Thermoproteota	c__Nitrososphaeria	o__Nitrososphaerales	f__Nitrososphaeraceae	g__TH1177	s__Unclassified	32
MAG156	d__Bacteria	p__Actinomycetota	c__Acidimicrobiia	o__UBA5794	f__ZC4RG35	g__Unclassified	s__Unclassified	55
MAG157	d__Bacteria	p__Actinomycetota	c__Actinomycetia	o__Jiangellales	f__Unclassified	g__Unclassified	s__Unclassified	52
MAG158	d__Archaea	p__Halobacteriota	c__Methanosarcinia	o__Methanosarcinales	f__Methanosarcinaceae	g__Methanosarcina	s__Unclassified	78
MAG159	d__Bacteria	p__Actinomycetota	c__Actinomycetia	o__Nanopelagicales	f__CAIYMF01	g__Unclassified	s__Unclassified	48
MAG16	d__Bacteria	p__Pseudomonadota	c__Alphaproteobacteria	o__Rhizobiales	f__Methyloligellaceae	g__Methyloceanibacter	s__Unclassified	54
MAG160	d__Bacteria	p__Actinomycetota	c__Acidimicrobiia	o__Acidimicrobiales	f__UBA8139	g__Rhabdothermincola_A	s__Unclassified	63
MAG161	d__Bacteria	p__Actinomycetota	c__Actinomycetia	o__Nanopelagicales	f__GCA-2699445	g__Unclassified	s__Unclassified	32
MAG162	d__Bacteria	p__Actinomycetota	c__Acidimicrobiia	o__Acidimicrobiales	f__Ilumatobacteraceae	g__Ilumatobacter	s__Unclassified	90
MAG163	d__Bacteria	p__Chloroflexota	c__Anaerolineae	o__Anaerolineales	f__UBA4823	g__DSOS01	s__Unclassified	83
MAG164	d__Bacteria	p__Chloroflexota	c__Anaerolineae	o__Anaerolineales	f__UBA4823	g__PFL25	s__PFL25 sp020349245	45
MAG165	d__Bacteria	p__Pseudomonadota	c__Alphaproteobacteria	o__Rhizobiales	f__Methyloligellaceae	g__Methyloceanibacter	s__Unclassified	57
MAG166	d__Bacteria	p__Chloroflexota	c__Anaerolineae	o__Anaerolineales	f__DRKV01	g__JAGUYX01	s__Unclassified	61
MAG167	d__Bacteria	p__Bacteroidota	c__Bacteroidia	o__Flavobacteriales	f__Flavobacteriaceae	g__Robiginitalea	s__Unclassified	38
MAG168	d__Bacteria	p__Pseudomonadota	c__Alphaproteobacteria	o__Rhizobiales	f__Rhizobiaceae	g__Salaquimonas	s__Unclassified	60
MAG169	d__Bacteria	p__Pseudomonadota	c__Alphaproteobacteria	o__Rhizobiales	f__Aestuariivirgaceae	g__Anderseniella	s__Unclassified	62
MAG17	d__Bacteria	p__Acidobacteriota	c__Aminicenantia	o__UBA2199	f__UBA2199	g__Unclassified	s__Unclassified	26
MAG170	d__Bacteria	p__Pseudomonadota	c__Alphaproteobacteria	o__Rhizobiales	f__Methyloligellaceae	g__Methyloceanibacter	s__Unclassified	81
MAG171	d__Bacteria	p__Chloroflexota	c__Anaerolineae	o__Promineofilales	f__Promineofilaceae	g__JAKEFB01	s__Unclassified	55
MAG172	d__Bacteria	p__Desulfobacterota	c__DSM-4660	o__Desulfatiglandales	f__Desulfatiglandaceae	g__B46-G9	s__Unclassified	66
MAG173	d__Bacteria	p__Actinomycetota	c__Actinomycetia	o__Actinomycetales	f__Dermatophilaceae	g__Phycicoccus	s__Unclassified	71
MAG174	d__Bacteria	p__Fermentibacterota	c__Fermentibacteria	o__Fermentibacterales	f__Fermentibacteraceae	g__Aegiribacteria	s__Unclassified	34
MAG175	d__Bacteria	p__Desulfobacterota	c__Desulfobacteria	o__Desulfobacterales	f__UBA11574	g__UBA11574	s__Unclassified	73
MAG176	d__Archaea	p__Thermoproteota	c__Nitrososphaeria	o__Nitrososphaerales	f__Nitrososphaeraceae	g__TH1177	s__Unclassified	37
MAG177	d__Bacteria	p__Acidobacteriota	c__Thermoanaerobaculia	o__Thermoanaerobaculales	f__Sulfomarinibacteraceae	g__Sulfomarinibacter	s__Sulfomarinibacter sp022340665	35
MAG178	d__Bacteria	p__Pseudomonadota	c__Gammaproteobacteria	o__Woeseiales	f__Woeseiaceae	g__UBA1847	s__Unclassified	61
MAG179	d__Bacteria	p__Pseudomonadota	c__Alphaproteobacteria	o__Rhizobiales	f__Aestuariivirgaceae	g__Anderseniella	s__Unclassified	57
MAG18	d__Bacteria	p__Chloroflexota	c__Anaerolineae	o__Promineofilales	f__Promineofilaceae	g__JAKEFB01	s__Unclassified	63
MAG180	d__Bacteria	p__Desulfobacterota	c__Syntrophobacteria	o__BM002	f__BM002	g__BM002	s__Unclassified	43
MAG181	d__Bacteria	p__Actinomycetota	c__Actinomycetia	o__Nanopelagicales	f__GCA-2699445	g__Unclassified	s__Unclassified	36
MAG182	d__Bacteria	p__Actinomycetota	c__Actinomycetia	o__Nanopelagicales	f__GCA-2699445	g__Unclassified	s__Unclassified	43
MAG183	d__Bacteria	p__Cyanobacteriota	c__Cyanobacteriia	o__Cyanobacteriales	f__Xenococcaceae	g__Waterburya	s__Unclassified	49
MAG184	d__Bacteria	p__Bacteroidota	c__Bacteroidia	o__Bacteroidales	f__VadinHA17	g__SR-FBR-E99	s__Unclassified	39
MAG185	d__Bacteria	p__Pseudomonadota	c__Alphaproteobacteria	o__Kiloniellales	f__JAKSDN01	g__Unclassified	s__Unclassified	60
MAG186	d__Bacteria	p__Pseudomonadota	c__Alphaproteobacteria	o__Rhizobiales	f__Rhizobiaceae	g__Salaquimonas	s__Unclassified	53
MAG187	d__Bacteria	p__Planctomycetota	c__Planctomycetia	o__Pirellulales	f__Pirellulaceae	g__GCA-2723275	s__Unclassified	65
MAG188	d__Bacteria	p__Desulfobacterota	c__Desulfobacteria	o__Desulfobacterales	f__UBA11574	g__UBA11574	s__Unclassified	62
MAG189	d__Bacteria	p__Chloroflexota	c__Anaerolineae	o__Anaerolineales	f__UBA4823	g__DSOS01	s__Unclassified	80
MAG19	d__Bacteria	p__Pseudomonadota	c__Alphaproteobacteria	o__Rhizobiales	f__Rhizobiaceae	g__Salaquimonas	s__Unclassified	57
MAG190	d__Bacteria	p__Synergistota	c__Synergistia	o__Synergistales	f__79-D21	g__79-D21	s__Unclassified	33
MAG191	d__Bacteria	p__Chloroflexota	c__Anaerolineae	o__Anaerolineales	f__UBA11858	g__B10-G9	s__Unclassified	49
MAG192	d__Bacteria	p__Bacteroidota	c__Bacteroidia	o__Flavobacteriales	f__Flavobacteriaceae	g__Robiginitalea	s__Unclassified	41
MAG193	d__Bacteria	p__Gemmatimonadota	c__Gemmatimonadetes	o__Longimicrobiales	f__UBA6960	g__IDS-52	s__Unclassified	30
MAG194	d__Bacteria	p__Desulfobacterota	c__Desulfobulbia	o__Desulfobulbales	f__Desulfocapsaceae	g__JABDQA01	s__Unclassified	52
MAG195	d__Bacteria	p__Desulfobacterota	c__Desulfobacteria	o__Desulfobacterales	f__B30-G6	g__Unclassified	s__Unclassified	89
MAG196	d__Bacteria	p__Pseudomonadota	c__Alphaproteobacteria	o__Rhizobiales	f__Rhizobiaceae	g__Unclassified	s__Unclassified	91
MAG197	d__Bacteria	p__Bacteroidota	c__Bacteroidia	o__Flavobacteriales	f__Flavobacteriaceae	g__Robiginitalea	s__Unclassified	38
MAG198	d__Bacteria	p__Actinomycetota	c__Actinomycetia	o__Nanopelagicales	f__GCA-2699445	g__Unclassified	s__Unclassified	33
MAG199	d__Bacteria	p__Chloroflexota	c__Anaerolineae	o__Promineofilales	f__Promineofilaceae	g__JAKEFB01	s__Unclassified	67
MAG2	d__Bacteria	p__Chloroflexota	c__Anaerolineae	o__Promineofilales	f__Promineofilaceae	g__Unclassified	s__Unclassified	56
MAG20	d__Bacteria	p__Desulfobacterota	c__Desulfobacteria	o__Desulfobacterales	f__UBA11574	g__UBA11574	s__Unclassified	64
MAG200	d__Archaea	p__Halobacteriota	c__Methanomicrobia	o__Methanomicrobiales	f__Methanomicrobiaceae	g__Methanogenium	s__Unclassified	54
MAG201	d__Bacteria	p__Actinomycetota	c__Thermoleophilia	o__Solirubrobacterales	f__70-9	g__JAJKHV01	s__Unclassified	53
MAG202	d__Bacteria	p__Pseudomonadota	c__Alphaproteobacteria	o__Rhizobiales	f__Rhizobiaceae	g__Salaquimonas	s__Unclassified	51
MAG203	d__Bacteria	p__Pseudomonadota	c__Alphaproteobacteria	o__Rhizobiales	f__Rhizobiaceae	g__Unclassified	s__Unclassified	81
MAG204	d__Bacteria	p__Chloroflexota	c__Anaerolineae	o__Anaerolineales	f__UBA4823	g__DSOS01	s__Unclassified	80
MAG205	d__Bacteria	p__Bacteroidota	c__Bacteroidia	o__Flavobacteriales	f__Flavobacteriaceae	g__Robiginitalea	s__Unclassified	34
MAG206	d__Bacteria	p__Bacteroidota	c__Bacteroidia	o__Bacteroidales	f__UBA5342	g__Unclassified	s__Unclassified	30
MAG207	d__Bacteria	p__Pseudomonadota	c__Alphaproteobacteria	o__Rhizobiales	f__Xanthobacteraceae	g__Pseudolabrys	s__Unclassified	109
MAG208	d__Bacteria	p__Bacteroidota	c__Ignavibacteria	o__Ignavibacteriales	f__Ignavibacteriaceae	g__Unclassified	s__Unclassified	38
MAG209	d__Bacteria	p__Gemmatimonadota	c__Gemmatimonadetes	o__Longimicrobiales	f__UBA6960	g__Unclassified	s__Unclassified	43
MAG21	d__Archaea	p__Halobacteriota	c__Methanosarcinia	o__Methanosarcinales	f__Methanosarcinaceae	g__Methanosarcina	s__Unclassified	87
MAG210	d__Bacteria	p__Pseudomonadota	c__Gammaproteobacteria	o__XN24	f__XN24	g__Unclassified	s__Unclassified	57
MAG211	d__Bacteria	p__Pseudomonadota	c__Alphaproteobacteria	o__Rhizobiales	f__Methyloligellaceae	g__Methyloceanibacter	s__Unclassified	64
MAG212	d__Bacteria	p__Actinomycetota	c__Actinomycetia	o__Jiangellales	f__Unclassified	g__Unclassified	s__Unclassified	44
MAG213	d__Bacteria	p__Pseudomonadota	c__Gammaproteobacteria	o__Woeseiales	f__Woeseiaceae	g__JAACFE01	s__Unclassified	50
MAG214	d__Bacteria	p__Chloroflexota	c__Anaerolineae	o__Promineofilales	f__Promineofilaceae	g__JAACFF01	s__Unclassified	68
MAG215	d__Bacteria	p__Bacteroidota	c__Bacteroidia	o__Chitinophagales	f__Saprospiraceae	g__Unclassified	s__Unclassified	38
MAG216	d__Bacteria	p__Nitrospirota	c__Nitrospiria	o__Nitrospirales	f__UBA8639	g__UBA8639	s__Unclassified	40
MAG217	d__Bacteria	p__Chloroflexota	c__Anaerolineae	o__Anaerolineales	f__UBA4823	g__PFL25	s__Unclassified	65
MAG218	d__Bacteria	p__Pseudomonadota	c__Alphaproteobacteria	o__Sphingomonadales	f__Sphingomonadaceae	g__Erythrobacter	s__Unclassified	38
MAG219	d__Bacteria	p__Bacteroidota	c__Bacteroidia	o__Flavobacteriales	f__Flavobacteriaceae	g__Flavobacterium	s__Unclassified	30
MAG22	d__Bacteria	p__Pseudomonadota	c__Gammaproteobacteria	o__XN24	f__XN24	g__Unclassified	s__Unclassified	56
MAG220	d__Bacteria	p__Pseudomonadota	c__Gammaproteobacteria	o__Arenicellales	f__BMS3Bbin11	g__BMS3Bbin11	s__Unclassified	21
MAG221	d__Bacteria	p__Desulfobacterota	c__Desulfobacteria	o__Desulfobacterales	f__B30-G6	g__Unclassified	s__Unclassified	81
MAG222	d__Bacteria	p__Bacteroidota	c__Bacteroidia	o__Bacteroidales	f__VadinHA17	g__SR-FBR-E99	s__Unclassified	33
MAG223	d__Archaea	p__Thermoproteota	c__Nitrososphaeria	o__Nitrososphaerales	f__Nitrososphaeraceae	g__TH1177	s__Unclassified	36
MAG224	d__Bacteria	p__Desulfobacterota_D	c__UBA1144	o__UBA2774	f__UBA2774	g__2-12-FULL-53-21	s__Unclassified	34
MAG225	d__Bacteria	p__Bacteroidota	c__Bacteroidia	o__Flavobacteriales	f__Flavobacteriaceae	g__Lutibacter	s__Unclassified	29
MAG226	d__Bacteria	p__Planctomycetota	c__Planctomycetia	o__Pirellulales	f__Pirellulaceae	g__Rubripirellula	s__Unclassified	51
MAG227	d__Bacteria	p__Actinomycetota	c__Actinomycetia	o__Actinomycetales	f__Dermatophilaceae	g__Phycicoccus	s__Unclassified	65
MAG228	d__Bacteria	p__Pseudomonadota	c__Gammaproteobacteria	o__Pseudomonadales	f__Halieaceae	g__Halioglobus	s__Unclassified	66
MAG229	d__Bacteria	p__Bacteroidota	c__Ignavibacteria	o__Ignavibacteriales	f__Melioribacteraceae	g__GCA-2746605	s__Unclassified	43
MAG23	d__Bacteria	p__Actinomycetota	c__Actinomycetia	o__Actinomycetales	f__Dermatophilaceae	g__Phycicoccus	s__Unclassified	71
MAG230	d__Bacteria	p__Pseudomonadota	c__Gammaproteobacteria	o__Steroidobacterales	f__Steroidobacteraceae	g__Unclassified	s__Unclassified	57
MAG231	d__Bacteria	p__Pseudomonadota	c__Gammaproteobacteria	o__Acidiferrobacterales	f__SPGG2	g__SZUA-472	s__SZUA-472 sp003251795	60
MAG232	d__Bacteria	p__Desulfobacterota	c__Syntrophobacteria	o__BM002	f__BM002	g__BM002	s__Unclassified	46
MAG233	d__Bacteria	p__Bacteroidota	c__Ignavibacteria	o__Ignavibacteriales	f__Ignavibacteriaceae	g__Unclassified	s__Unclassified	32
MAG234	d__Archaea	p__Thermoproteota	c__Nitrososphaeria	o__Nitrososphaerales	f__Nitrososphaeraceae	g__TH1177	s__Unclassified	36
MAG235	d__Bacteria	p__Chloroflexota	c__Anaerolineae	o__Promineofilales	f__Promineofilaceae	g__UBA11865	s__Unclassified	90
MAG236	d__Bacteria	p__Bacteroidota	c__Bacteroidia	o__Bacteroidales	f__F082	g__UBA4459	s__Unclassified	33
MAG237	d__Bacteria	p__Actinomycetota	c__Acidimicrobiia	o__UBA5794	f__JAHEDJ01	g__JAHEDJ01	s__Unclassified	61
MAG238	d__Bacteria	p__Bacteroidota	c__Ignavibacteria	o__Ignavibacteriales	f__Melioribacteraceae	g__GCA-2746605	s__Unclassified	41
MAG239	d__Bacteria	p__Myxococcota	c__Polyangia	o__Haliangiales	f__Haliangiaceae	g__Unclassified	s__Unclassified	66
MAG24	d__Archaea	p__Thermoproteota	c__Nitrososphaeria	o__Nitrososphaerales	f__Nitrososphaeraceae	g__TH1177	s__Unclassified	35
MAG240	d__Bacteria	p__Actinomycetota	c__Actinomycetia	o__Actinomycetales	f__Dermatophilaceae	g__Phycicoccus	s__Unclassified	62
MAG241	d__Bacteria	p__Pseudomonadota	c__Gammaproteobacteria	o__XN24	f__XN24	g__JAHEFR01	s__Unclassified	47
MAG242	d__Bacteria	p__Pseudomonadota	c__Alphaproteobacteria	o__Rhizobiales	f__Aestuariivirgaceae	g__Anderseniella	s__Unclassified	62
MAG243	d__Bacteria	p__Bacteroidota	c__Bacteroidia	o__Bacteroidales	f__VadinHA17	g__SR-FBR-E99	s__Unclassified	33
MAG244	d__Bacteria	p__Myxococcota	c__Polyangia	o__GCA-2747355	f__Unclassified	g__Unclassified	s__Unclassified	57
MAG245	d__Bacteria	p__Bacteroidota	c__Bacteroidia	o__Flavobacteriales	f__Flavobacteriaceae	g__HKST-UBA85	s__Unclassified	39
MAG246	d__Bacteria	p__Pseudomonadota	c__Gammaproteobacteria	o__Chromatiales	f__Sedimenticolaceae	g__Sva-25	s__Unclassified	24
MAG247	d__Bacteria	p__Desulfobacterota	c__Desulfobacteria	o__Desulfobacterales	f__B30-G6	g__Unclassified	s__Unclassified	79
MAG248	d__Bacteria	p__Planctomycetota	c__Planctomycetia	o__Pirellulales	f__Pirellulaceae	g__JAGQPK01	s__Unclassified	60
MAG249	d__Bacteria	p__Pseudomonadota	c__Alphaproteobacteria	o__Rhizobiales	f__Methyloligellaceae	g__Methyloceanibacter	s__Unclassified	73
MAG25	d__Bacteria	p__Actinomycetota	c__Actinomycetia	o__Jiangellales	f__Unclassified	g__Unclassified	s__Unclassified	40
MAG250	d__Archaea	p__Thermoproteota	c__Nitrososphaeria	o__Nitrososphaerales	f__Nitrososphaeraceae	g__TH1177	s__Unclassified	36
MAG251	d__Bacteria	p__Pseudomonadota	c__Gammaproteobacteria	o__Pseudomonadales	f__Halieaceae	g__Halioglobus	s__Unclassified	84
MAG252	d__Bacteria	p__Pseudomonadota	c__Gammaproteobacteria	o__Woeseiales	f__Woeseiaceae	g__UBA1847	s__Unclassified	52
MAG253	d__Bacteria	p__Acidobacteriota	c__Thermoanaerobaculia	o__Thermoanaerobaculales	f__Sulfomarinibacteraceae	g__Unclassified	s__Unclassified	34
MAG254	d__Bacteria	p__Chloroflexota	c__Anaerolineae	o__Promineofilales	f__Promineofilaceae	g__UBA11865	s__Unclassified	84
MAG255	d__Bacteria	p__Actinomycetota	c__Acidimicrobiia	o__Acidimicrobiales	f__Ilumatobacteraceae	g__Ilumatobacter	s__Unclassified	59
MAG256	d__Bacteria	p__Pseudomonadota	c__Gammaproteobacteria	o__XN24	f__XN24	g__Unclassified	s__Unclassified	55
MAG257	d__Bacteria	p__Actinomycetota	c__Actinomycetia	o__Jiangellales	f__Unclassified	g__Unclassified	s__Unclassified	40
MAG258	d__Bacteria	p__Desulfobacterota	c__Desulfobulbia	o__Desulfobulbales	f__Desulfocapsaceae	g__JABDQA01	s__Unclassified	68
MAG259	d__Bacteria	p__Pseudomonadota	c__Alphaproteobacteria	o__Rhizobiales	f__Methyloligellaceae	g__Methyloceanibacter	s__Unclassified	59
MAG26	d__Bacteria	p__Bacteroidota	c__Bacteroidia	o__Flavobacteriales	f__Flavobacteriaceae	g__Lutimonas	s__Unclassified	42
MAG260	d__Bacteria	p__Pseudomonadota	c__Alphaproteobacteria	o__Rhizobiales	f__Methyloligellaceae	g__Methyloceanibacter	s__Unclassified	52
MAG261	d__Bacteria	p__Bacteroidota	c__Bacteroidia	o__Flavobacteriales	f__Flavobacteriaceae	g__Flavobacterium	s__Unclassified	27
MAG262	d__Bacteria	p__Actinomycetota	c__Acidimicrobiia	o__UBA5794	f__ZC4RG35	g__Unclassified	s__Unclassified	54
MAG263	d__Bacteria	p__Chloroflexota	c__Anaerolineae	o__Promineofilales	f__Promineofilaceae	g__Unclassified	s__Unclassified	67
MAG264	d__Bacteria	p__Desulfobacterota_B	c__Binatia	o__DP-6	f__DP-6	g__Unclassified	s__Unclassified	67
MAG265	d__Bacteria	p__Cyanobacteriota	c__Cyanobacteriia	o__Cyanobacteriales	f__Xenococcaceae	g__Waterburya	s__Unclassified	50
MAG266	d__Bacteria	p__Pseudomonadota	c__Gammaproteobacteria	o__Steroidobacterales	f__Steroidobacteraceae	g__Unclassified	s__Unclassified	51
MAG267	d__Bacteria	p__Desulfobacterota	c__Desulfobacteria	o__Desulfobacterales	f__UBA11574	g__UBA11574	s__Unclassified	66
MAG268	d__Bacteria	p__Pseudomonadota	c__Gammaproteobacteria	o__UBA9214	f__UBA9214	g__UBA9214	s__Unclassified	39
MAG269	d__Bacteria	p__Acidobacteriota	c__Thermoanaerobaculia	o__Thermoanaerobaculales	f__Sulfomarinibacteraceae	g__JANTFG01	s__Unclassified	30
MAG27	d__Bacteria	p__Chloroflexota	c__Anaerolineae	o__Anaerolineales	f__UBA4823	g__PFL25	s__Unclassified	58
MAG270	d__Bacteria	p__Pseudomonadota	c__Gammaproteobacteria	o__Competibacterales	f__Competibacteraceae	g__Unclassified	s__Unclassified	99
MAG271	d__Bacteria	p__Pseudomonadota	c__Gammaproteobacteria	o__UBA9214	f__UBA9214	g__UBA9214	s__Unclassified	40
MAG272	d__Bacteria	p__Nitrospirota	c__Nitrospiria	o__Nitrospirales	f__UBA8639	g__UBA8639	s__Unclassified	29
MAG273	d__Bacteria	p__Pseudomonadota	c__Gammaproteobacteria	o__UBA9214	f__UBA9214	g__Unclassified	s__Unclassified	41
MAG274	d__Bacteria	p__Actinomycetota	c__Acidimicrobiia	o__UBA5794	f__ZC4RG35	g__Unclassified	s__Unclassified	53
MAG275	d__Bacteria	p__Bacteroidota	c__Bacteroidia	o__Flavobacteriales	f__Flavobacteriaceae	g__Robiginitalea	s__Unclassified	42
MAG276	d__Bacteria	p__Pseudomonadota	c__Gammaproteobacteria	o__Steroidobacterales	f__Steroidobacteraceae	g__Unclassified	s__Unclassified	55
MAG277	d__Bacteria	p__Desulfobacterota	c__Desulfobulbia	o__Desulfobulbales	f__Desulfocapsaceae	g__JABDQA01	s__Unclassified	70
MAG278	d__Bacteria	p__Chloroflexota	c__Anaerolineae	o__Anaerolineales	f__UBA4823	g__PFL25	s__Unclassified	57
MAG279	d__Bacteria	p__Pseudomonadota	c__Gammaproteobacteria	o__Burkholderiales	f__Nitrosomonadaceae	g__Nitrosomonas	s__Nitrosomonas sp024235735	31
MAG28	d__Bacteria	p__Pseudomonadota	c__Gammaproteobacteria	o__Chromatiales	f__Sedimenticolaceae	g__Sva-25	s__Unclassified	30
MAG280	d__Bacteria	p__Desulfobacterota	c__Desulfobulbia	o__Desulfobulbales	f__Desulfocapsaceae	g__JABDQA01	s__Unclassified	58
MAG281	d__Bacteria	p__Chloroflexota	c__Anaerolineae	o__Anaerolineales	f__UBA11858	g__B10-G9	s__Unclassified	41
MAG282	d__Bacteria	p__Actinomycetota	c__Actinomycetia	o__Actinomycetales	f__Dermatophilaceae	g__Phycicoccus	s__Unclassified	70
MAG283	d__Bacteria	p__Actinomycetota	c__Acidimicrobiia	o__UBA5794	f__ZC4RG35	g__SZUA-217	s__Unclassified	55
MAG29	d__Bacteria	p__Desulfobacterota	c__Desulfobulbia	o__Desulfobulbales	f__Desulfocapsaceae	g__JABDQA01	s__Unclassified	68
MAG3	d__Bacteria	p__Chloroflexota	c__Anaerolineae	o__Promineofilales	f__Promineofilaceae	g__JAKEFB01	s__Unclassified	57
MAG30	d__Bacteria	p__Chloroflexota	c__Anaerolineae	o__Anaerolineales	f__UBA4823	g__DSOS01	s__Unclassified	75
MAG31	d__Bacteria	p__Bacteroidota	c__Bacteroidia	o__Chitinophagales	f__Saprospiraceae	g__Unclassified	s__Unclassified	41
MAG32	d__Bacteria	p__Pseudomonadota	c__Gammaproteobacteria	o__Chromatiales	f__Chromatiaceae	g__Thiohalocapsa	s__Unclassified	50
MAG33	d__Bacteria	p__Actinomycetota	c__Actinomycetia	o__Jiangellales	f__Unclassified	g__Unclassified	s__Unclassified	45
MAG34	d__Bacteria	p__Actinomycetota	c__Acidimicrobiia	o__Acidimicrobiales	f__Ilumatobacteraceae	g__Ilumatobacter	s__Unclassified	91
MAG35	d__Bacteria	p__Pseudomonadota	c__Alphaproteobacteria	o__Sphingomonadales	f__Sphingomonadaceae	g__Erythrobacter	s__Unclassified	42
MAG36	d__Bacteria	p__Actinomycetota	c__Actinomycetia	o__Mycobacteriales	f__Mycobacteriaceae	g__Mycobacterium	s__Unclassified	69
MAG37	d__Bacteria	p__Bacteroidota	c__Bacteroidia	o__Flavobacteriales	f__Flavobacteriaceae	g__Robiginitalea	s__Unclassified	36
MAG38	d__Bacteria	p__Bacteroidota	c__Bacteroidia	o__Flavobacteriales	f__Flavobacteriaceae	g__Lutimonas	s__Unclassified	42
MAG39	d__Archaea	p__Thermoproteota	c__Nitrososphaeria	o__Nitrososphaerales	f__Nitrososphaeraceae	g__TH5896	s__Unclassified	39
MAG4	d__Archaea	p__Halobacteriota	c__Methanosarcinia	o__Methanosarcinales	f__Methanosarcinaceae	g__Methanosarcina	s__Unclassified	80
MAG40	d__Bacteria	p__Pseudomonadota	c__Gammaproteobacteria	o__Woeseiales	f__Woeseiaceae	g__UBA1847	s__Unclassified	57
MAG41	d__Bacteria	p__Pseudomonadota	c__Gammaproteobacteria	o__UBA9214	f__UBA9214	g__Unclassified	s__Unclassified	40
MAG42	d__Bacteria	p__Pseudomonadota	c__Gammaproteobacteria	o__Burkholderiales	f__Burkholderiaceae_A	g__JADJWR01	s__JADJWR01 sp020355165	87
MAG43	d__Bacteria	p__Actinomycetota	c__Acidimicrobiia	o__Acidimicrobiales	f__Microtrichaceae	g__JAAEPF01	s__Unclassified	52
MAG44	d__Bacteria	p__Actinomycetota	c__UBA4738	o__UBA4738	f__HRBIN12	g__Unclassified	s__Unclassified	41
MAG45	d__Bacteria	p__Bacteroidota	c__Bacteroidia	o__Flavobacteriales	f__Flavobacteriaceae	g__Robiginitalea	s__Unclassified	30
MAG46	d__Bacteria	p__Pseudomonadota	c__Gammaproteobacteria	o__Pseudomonadales	f__Halieaceae	g__Halioglobus	s__Unclassified	76
MAG47	d__Bacteria	p__Pseudomonadota	c__Gammaproteobacteria	o__Steroidobacterales	f__Steroidobacteraceae	g__Unclassified	s__Unclassified	47
MAG48	d__Bacteria	p__Bacteroidota	c__Bacteroidia	o__Flavobacteriales	f__Flavobacteriaceae	g__Robiginitalea	s__Unclassified	34
MAG49	d__Bacteria	p__Pseudomonadota	c__Gammaproteobacteria	o__Chromatiales	f__Sedimenticolaceae	g__Unclassified	s__Unclassified	37
MAG5	d__Bacteria	p__Gemmatimonadota	c__Gemmatimonadetes	o__Longimicrobiales	f__UBA6960	g__Unclassified	s__Unclassified	46
MAG50	d__Archaea	p__Thermoproteota	c__Nitrososphaeria	o__Nitrososphaerales	f__Nitrososphaeraceae	g__TH5896	s__Unclassified	34
MAG51	d__Bacteria	p__Pseudomonadota	c__Gammaproteobacteria	o__XN24	f__XN24	g__Unclassified	s__Unclassified	61
MAG52	d__Bacteria	p__Bacteroidota	c__Bacteroidia	o__Flavobacteriales	f__Flavobacteriaceae	g__Robiginitalea	s__Unclassified	36
MAG53	d__Bacteria	p__Bacteroidota	c__Bacteroidia	o__Flavobacteriales	f__Flavobacteriaceae	g__Lutimonas	s__Unclassified	42
MAG54	d__Bacteria	p__Actinomycetota	c__Acidimicrobiia	o__Acidimicrobiales	f__Microtrichaceae	g__JAAEPF01	s__Unclassified	65
MAG55	d__Bacteria	p__Desulfobacterota	c__Syntrophobacteria	o__BM002	f__BM002	g__BM002	s__Unclassified	51
MAG56	d__Bacteria	p__Planctomycetota	c__Planctomycetia	o__Pirellulales	f__Pirellulaceae	g__JAGQPK01	s__Unclassified	51
MAG57	d__Bacteria	p__Bacteroidota	c__Bacteroidia	o__Flavobacteriales	f__Flavobacteriaceae	g__Lutimonas	s__Unclassified	40
MAG58	d__Bacteria	p__Bacteroidota	c__Bacteroidia	o__Flavobacteriales	f__Flavobacteriaceae	g__HKST-UBA85	s__Unclassified	35
MAG59	d__Bacteria	p__Acidobacteriota	c__Thermoanaerobaculia	o__Thermoanaerobaculales	f__Unclassified	g__Unclassified	s__Unclassified	30
MAG6	d__Bacteria	p__Chloroflexota	c__Anaerolineae	o__Anaerolineales	f__UBA4823	g__PFL25	s__Unclassified	64
MAG60	d__Bacteria	p__Desulfobacterota	c__Desulfobulbia	o__Desulfobulbales	f__Desulfocapsaceae	g__JABDQA01	s__Unclassified	58
MAG61	d__Bacteria	p__Pseudomonadota	c__Gammaproteobacteria	o__Woeseiales	f__Woeseiaceae	g__JAACFE01	s__Unclassified	58
MAG62	d__Bacteria	p__Chloroflexota	c__Anaerolineae	o__Anaerolineales	f__UBA4823	g__PFL25	s__Unclassified	57
MAG63	d__Bacteria	p__Desulfobacterota	c__Desulfobulbia	o__Desulfobulbales	f__Desulfocapsaceae	g__JABDQA01	s__Unclassified	66
MAG64	d__Bacteria	p__Bacteroidota	c__Bacteroidia	o__Bacteroidales	f__VadinHA17	g__SR-FBR-E99	s__SR-FBR-E99 sp006227095	30
MAG65	d__Bacteria	p__Bacteroidota	c__Bacteroidia	o__Bacteroidales	f__Prolixibacteraceae	g__Draconibacterium	s__Unclassified	33
MAG66	d__Bacteria	p__Planctomycetota	c__Planctomycetia	o__Pirellulales	f__Pirellulaceae	g__Rubripirellula	s__Unclassified	62
MAG67	d__Bacteria	p__Pseudomonadota	c__Gammaproteobacteria	o__Steroidobacterales	f__Steroidobacteraceae	g__SG8-30	s__Unclassified	57
MAG68	d__Bacteria	p__Bacteroidota	c__Bacteroidia	o__Chitinophagales	f__Saprospiraceae	g__Unclassified	s__Unclassified	38
MAG69	d__Bacteria	p__Chloroflexota	c__Anaerolineae	o__Anaerolineales	f__EnvOPS12	g__JAABUE01	s__Unclassified	87
MAG7	d__Bacteria	p__Actinomycetota	c__Actinomycetia	o__Jiangellales	f__Unclassified	g__Unclassified	s__Unclassified	44
MAG70	d__Bacteria	p__Pseudomonadota	c__Gammaproteobacteria	o__Burkholderiales	f__Burkholderiaceae_A	g__JADJWR01	s__JADJWR01 sp020355165	72
MAG71	d__Bacteria	p__Chloroflexota	c__Anaerolineae	o__Promineofilales	f__Promineofilaceae	g__UBA11865	s__Unclassified	88
MAG72	d__Bacteria	p__Actinomycetota	c__Actinomycetia	o__Nanopelagicales	f__GCA-2699445	g__Unclassified	s__Unclassified	43
MAG73	d__Bacteria	p__Actinomycetota	c__Actinomycetia	o__Actinomycetales	f__Dermatophilaceae	g__Phycicoccus	s__Unclassified	75
MAG74	d__Bacteria	p__Bacteroidota	c__Bacteroidia	o__Flavobacteriales	f__Flavobacteriaceae	g__QXCW01	s__Unclassified	34
MAG75	d__Bacteria	p__Chloroflexota	c__Anaerolineae	o__Anaerolineales	f__UBA4823	g__PFL25	s__Unclassified	61
MAG76	d__Bacteria	p__Gemmatimonadota	c__Gemmatimonadetes	o__KS3-K002	f__JABDQB01	g__Unclassified	s__Unclassified	44
MAG77	d__Bacteria	p__Chloroflexota	c__Anaerolineae	o__Anaerolineales	f__DRKV01	g__JAGUYX01	s__Unclassified	64
MAG78	d__Bacteria	p__Bacteroidota	c__Bacteroidia	o__Flavobacteriales	f__Flavobacteriaceae	g__Lutimonas	s__Unclassified	42
MAG79	d__Bacteria	p__Actinomycetota	c__Actinomycetia	o__Jiangellales	f__Unclassified	g__Unclassified	s__Unclassified	51
MAG8	d__Bacteria	p__Desulfobacterota	c__Desulfobacteria	o__Desulfobacterales	f__UBA11574	g__UBA11574	s__UBA11574 sp003486165	54
MAG80	d__Bacteria	p__Pseudomonadota	c__Alphaproteobacteria	o__Rhizobiales	f__Methyloligellaceae	g__Methyloceanibacter	s__Unclassified	70
MAG81	d__Bacteria	p__Bacteroidota	c__Bacteroidia	o__Flavobacteriales	f__Flavobacteriaceae	g__Flavobacterium	s__Unclassified	32
MAG82	d__Bacteria	p__Chloroflexota	c__Anaerolineae	o__JAAEKA01	f__JAAEKA01	g__JAAEKA01	s__Unclassified	56
MAG83	d__Bacteria	p__Pseudomonadota	c__Gammaproteobacteria	o__Arenicellales	f__JAANXG01	g__JAHEKE01	s__Unclassified	83
MAG84	d__Bacteria	p__Chloroflexota	c__Anaerolineae	o__Anaerolineales	f__UBA4823	g__DSOS01	s__Unclassified	82
MAG85	d__Bacteria	p__Desulfobacterota	c__Desulfobacteria	o__Desulfobacterales	f__SG8-13	g__Unclassified	s__Unclassified	70
MAG86	d__Bacteria	p__Pseudomonadota	c__Gammaproteobacteria	o__Chromatiales	f__Sedimenticolaceae	g__Unclassified	s__Unclassified	30
MAG87	d__Bacteria	p__Pseudomonadota	c__Alphaproteobacteria	o__Rhizobiales	f__Xanthobacteraceae	g__Pseudolabrys	s__Unclassified	81
MAG88	d__Bacteria	p__Chloroflexota	c__Anaerolineae	o__Anaerolineales	f__Anaerolineaceae	g__UBA6170	s__Unclassified	34
MAG89	d__Bacteria	p__Pseudomonadota	c__Alphaproteobacteria	o__Rhizobiales	f__Rhizobiaceae	g__Salaquimonas	s__Unclassified	50
MAG9	d__Bacteria	p__Acidobacteriota	c__Thermoanaerobaculia	o__Thermoanaerobaculales	f__Sulfomarinibacteraceae	g__Sulfomarinibacter	s__Sulfomarinibacter sp022340665	39
MAG90	d__Bacteria	p__Pseudomonadota	c__Gammaproteobacteria	o__Woeseiales	f__Woeseiaceae	g__JAACFE01	s__Unclassified	51
MAG91	d__Bacteria	p__Pseudomonadota	c__Alphaproteobacteria	o__Rhodobacterales	f__Rhodobacteraceae	g__Unclassified	s__Unclassified	72
MAG92	d__Bacteria	p__Bacteroidota	c__Bacteroidia	o__Flavobacteriales	f__Flavobacteriaceae	g__Robiginitalea	s__Robiginitalea sp006227965	35
MAG93	d__Bacteria	p__Pseudomonadota	c__Gammaproteobacteria	o__Acidiferrobacterales	f__SPGG2	g__SZUA-472	s__SZUA-472 sp003251795	59
MAG94	d__Bacteria	p__Pseudomonadota	c__Alphaproteobacteria	o__Rhizobiales	f__Methyloligellaceae	g__Methyloceanibacter	s__Unclassified	78
MAG95	d__Bacteria	p__Chloroflexota	c__Anaerolineae	o__Promineofilales	f__Promineofilaceae	g__Unclassified	s__Unclassified	74
MAG96	d__Bacteria	p__Gemmatimonadota	c__Gemmatimonadetes	o__Longimicrobiales	f__UBA6960	g__JABDNZ01	s__Unclassified	41
MAG97	d__Bacteria	p__Desulfobacterota	c__Desulfobacteria	o__Desulfobacterales	f__B30-G6	g__Unclassified	s__Unclassified	85
MAG98	d__Bacteria	p__Pseudomonadota	c__Alphaproteobacteria	o__Rhizobiales	f__Methyloligellaceae	g__Methyloceanibacter	s__Unclassified	79
MAG99	d__Bacteria	p__Chloroflexota	c__Anaerolineae	o__Anaerolineales	f__UBA4823	g__PFL25	s__Unclassified	55
								15175
