# Supplementary material for: Divergent microbial community and functional dynamics in mangrove sediments along a polycyclic aromatic hydrocarbons (PAHs) gradient in China
Source: Research Square preprint supplement (doi:10.21203/rs.3.rs-7178259/v1), 2025-09-17
Supplement: Supplementary file 18 [file f2119313ffe2c219f6a7e792.xlsx]

## Sheet: 4655Genus
Domain	Kingdom	Phylum	Class	Order	Family	Genus	DY_1	DY_2	DY_3	CPT_LW_1	CPT_LW_2	CPT_LW_3	CPT_MZ_1	CPT_MZ_2	CPT_MZ_3	CPT_SW_1	CPT_SW_2	CPT_SW_3	FG_SC_1	FG_SC_2	FG_SC_3	FG_WR_1	FG_WR_2	FG_WR_3	M1_1_1	M1_1_2	M1_1_3	M1_2_1	M1_2_2	M1_2_3	M2_1_1	M2_1_2	M2_1_3	M2_2_1	M2_2_2	M2_2_3	M3_1_1	M3_1_2	M3_1_3	M3_2_1	M3_2_2	M3_2_3	DY	CPT	FG	M1	M2	M3	Total
d__Bacteria	k__unclassified_d__Bacteria	p__Chloroflexota	c__Anaerolineae	o__Anaerolineales	f__Anaerolineaceae	g__Anaerolinea	624220	544986	521792	814708	754286	984810	1000548	935776	1160854	913968	1063186	954000	1416390	1190638	848618	979200	935538	805318	485926	463502	604150	435860	249266	208832	1003922	927384	909430	700928	615620	1009542	805110	779778	752112	871882	878418	853596	563666	953571	1.02928e+06	407923	861138	823483	29004094
d__Bacteria	k__unclassified_d__Bacteria	p__Actinomycetota	c__Acidimicrobiia	o__Acidimicrobiales	f__Ilumatobacteraceae	g__Ilumatobacter	276192	384696	193802	422980	406680	550728	474312	510928	527776	416636	409034	509070	1153826	723336	689822	727082	488060	461738	597900	561466	756364	1042762	565556	396584	1225848	1272718	1399118	843430	1539374	1322698	730410	648882	662274	734806	810678	672148	284897	469794	707311	653439	1.2672e+06	709866	25109714
d__Bacteria	k__unclassified_d__Bacteria	p__Pseudomonadota	c__Gammaproteobacteria	o__Moraxellales	f__Moraxellaceae	g__Acinetobacter	3548	2936	12548	2832	2446	3588	3964	4880	5608	2860	3560	4928	2978	2370	2360	2518	4266	2290	1878	1700	2008	2634	2382	2484	5682	3350	3472	3554	3050	3794	84484	55050	228528	332168	1831898	448794	6344	3851.78	2797	2181	3817	496820	3087390
d__Bacteria	k__unclassified_d__Bacteria	p__Chloroflexota	c__Ardenticatenia	o__unclassified_c__Ardenticatenia	f__unclassified_c__Ardenticatenia	g__Candidatus_Promineifilum	154638	155408	129820	405206	359608	465824	447722	404070	534094	359220	413862	367762	1076530	764958	634698	510318	507154	314708	272782	277496	359580	355880	153558	131692	848780	815666	782300	501406	468344	719966	485086	471558	457760	524060	526042	513556	146622	417485	634728	258498	689410	496344	16671112
d__Bacteria	k__unclassified_d__Bacteria	p__Chloroflexota	c__Caldilineae	o__Caldilineales	f__Caldilineaceae	g__Caldilinea	212620	217832	171570	228878	205824	279018	280640	266596	345530	237336	279308	257732	658120	460796	350276	401460	402648	264508	240776	249228	298936	271992	133010	114564	550978	492086	502182	420444	408748	575554	489098	463672	459276	535110	513350	497446	200674	264540	422968	218084	491665	492992	12737142
d__Bacteria	k__unclassified_d__Bacteria	p__Actinomycetota	c__Actinomycetes	o__Propionibacteriales	f__Nocardioidaceae	g__Nocardioides	53850	65302	45002	84026	75100	100270	94752	101830	102812	102036	92002	128716	116330	91408	80796	180134	65492	281338	76332	77526	116562	142400	61796	49956	152024	167592	179146	115088	153440	178550	375574	323192	322316	395816	428766	305448	54718	97949.3	135916	87428.7	157640	358519	5482720
d__Bacteria	k__unclassified_d__Bacteria	p__Actinomycetota	c__Actinomycetes	o__Kitasatosporales	f__Streptomycetaceae	g__Streptomyces	51526	54040	39932	87142	75138	88392	85436	91226	82900	89812	89566	86748	100094	82042	67488	53170	37972	52704	78216	76656	119272	141460	60580	51696	129614	131974	140070	106346	141830	160234	359786	314784	315140	370944	392626	291362	48499.3	86262.2	65578.3	87980	135011	340774	4697918
d__Bacteria	k__unclassified_d__Bacteria	p__Actinomycetota	c__Actinomycetes	o__Mycobacteriales	f__Mycobacteriaceae	g__Mycobacterium	48094	63826	40576	256316	207032	223796	215816	276504	184568	245856	236144	247468	111660	101746	91806	107468	79712	121054	46214	46456	72126	77086	41582	34668	77476	75200	79512	65112	91862	103978	320976	296578	313578	379076	417378	290032	50832	232611	102241	53022	82190	336270	5688332
d__Bacteria	k__unclassified_d__Bacteria	p__Pseudomonadota	c__Alphaproteobacteria	o__Hyphomicrobiales	f__Parvibaculaceae	g__Anderseniella	96420	73286	71706	21698	17186	22290	19968	27934	22570	20142	22910	26942	126002	94420	95560	131926	108184	75448	80592	77844	98852	108678	72936	53176	117624	84714	100156	75480	156150	127738	293764	250066	276522	374382	413964	279946	80470.7	22404.4	105257	82013	110310	314774	4117176
d__Bacteria	k__unclassified_d__Bacteria	p__Pseudomonadota	c__Alphaproteobacteria	o__Hyphomicrobiales	f__Hyphomicrobiaceae	g__Hyphomicrobium	149904	196412	119906	286332	233600	288336	324126	419760	305708	304700	311818	325604	440514	304202	230284	386380	290610	247350	119452	109320	129342	134248	98080	79948	151464	148128	153608	110776	157500	179602	258916	241220	236878	274622	296970	265498	155407	311109	316557	111732	150180	262351	8311118
d__Bacteria	k__unclassified_d__Bacteria	p__Pseudomonadota	c__Gammaproteobacteria	o__Nevskiales	f__Steroidobacteraceae	g__Steroidobacter	206058	139208	145976	46856	41476	52372	61224	79324	49166	53808	56498	56574	434172	251604	211888	269734	246674	139192	33588	26676	34226	38444	33372	30538	69822	62844	64802	55314	71360	85356	222774	210424	206578	246570	216590	195308	163747	55255.3	258877	32807.3	68249.7	216374	4446390
d__Bacteria	k__unclassified_d__Bacteria	p__Chloroflexota	c__Caldilineae	o__Caldilineales	f__Caldilineaceae	g__Litorilinea	88620	80262	73202	122970	107088	144788	145192	138438	180352	121088	144582	130048	251230	193520	142692	172262	118720	127494	136742	140626	165214	148552	77068	65154	387414	339702	347712	365152	321404	476338	205752	194240	192078	214888	217136	211146	80694.7	137172	167653	122226	372954	205873	6688866
d__Bacteria	k__unclassified_d__Bacteria	p__Pseudomonadota	c__Gammaproteobacteria	o__Cellvibrionales	f__Halieaceae	g__Halioglobus	94756	109634	72542	90888	75450	94648	96266	105142	107796	83350	98116	87580	76560	74636	61980	73382	113550	44126	152614	131760	182150	223284	125954	124918	337078	353618	364942	250894	329094	305250	237994	223052	226574	158308	161958	184420	92310.7	93248.4	74039	156780	323479	198718	5634264
d__Bacteria	k__unclassified_d__Bacteria	p__Rhodothermota	c__Rhodothermia	o__Rhodothermales	f__Rubricoccaceae	g__Rubrivirga	6640	13894	5110	4630	3460	5000	5722	5706	6240	4668	4960	4696	14568	12830	9300	7152	7666	4892	26824	23588	48460	50052	16242	13388	46280	44256	49592	29522	40996	45374	201504	175606	176510	210392	222412	159660	8548	5009.11	9401.33	29759	42670	191014	1707792
d__Bacteria	k__unclassified_d__Bacteria	p__unclassified_d__Bacteria	c__Deltaproteobacteria	o__unclassified_c__Deltaproteobacteria	f__unclassified_c__Deltaproteobacteria	g__unclassified_c__Deltaproteobacteria	133256	96032	137970	179846	169286	246018	270328	261714	305288	190716	228850	205030	121060	120684	98662	60330	82460	96602	620712	466754	459076	169592	289752	213644	647680	559508	568364	745622	505066	964298	184744	190270	173640	182274	173134	198864	122419	228564	96633	369922	665090	183821	10317126
d__Bacteria	k__unclassified_d__Bacteria	p__Pseudomonadota	c__Gammaproteobacteria	o__Chromatiales	f__Ectothiorhodospiraceae	g__Thioalkalivibrio	114584	82480	82628	51738	44302	51474	55696	57936	50852	48144	51868	43854	168278	123540	119856	137622	174288	77716	194110	145302	197868	147928	157240	124572	147840	121438	127296	148218	215776	190420	199924	184012	193934	146952	133296	181506	93230.7	50651.6	133550	161170	158498	173271	4494488
d__Bacteria	k__unclassified_d__Bacteria	p__Pseudomonadota	c__Gammaproteobacteria	o__unclassified_c__Gammaproteobacteria	f__unclassified_c__Gammaproteobacteria	g__Sedimenticola	71706	58566	56990	29796	25510	30172	31582	32354	34018	31758	35658	31796	54338	53398	42302	46620	63798	29236	51744	43654	50716	75036	47586	44062	204328	208442	229924	110298	117282	136464	165234	156434	147008	178398	154114	147534	62420.7	31404.9	48282	52133	167790	158120	3027856
d__Bacteria	k__unclassified_d__Bacteria	p__Bacteroidota	c__Flavobacteriia	o__Flavobacteriales	f__Flavobacteriaceae	g__Robiginitalea	497008	180334	380260	3238	2700	4156	4264	5014	6068	4668	5372	5758	59808	41422	34450	64032	54604	28670	135846	112576	84568	153490	75728	68194	88074	51598	58738	104126	144890	139280	163304	143314	151706	156806	167270	150786	352534	4582	47164.3	105067	97784.3	155531	3532120
d__Bacteria	k__unclassified_d__Bacteria	p__Thermodesulfobacteriota	c__Desulfobacteria	o__Desulfobacterales	f__Desulfosarcinaceae	g__Desulfosarcina	56626	50834	57822	83596	80260	125820	143942	123458	208138	108342	147838	122352	128550	116918	96712	93246	148628	83004	167056	137662	128412	58174	98126	69452	418288	358064	369194	461012	361408	605722	151498	149674	137364	166280	153048	164510	55094	127083	111176	109814	428948	153729	6131030
d__Bacteria	k__unclassified_d__Bacteria	p__Pseudomonadota	c__Gammaproteobacteria	o__Chromatiales	f__Wenzhouxiangellaceae	g__Wenzhouxiangella	103636	86328	73030	58588	45714	54354	56346	53856	64446	41086	53726	39442	104526	80438	74600	128710	187176	63586	205670	156766	199632	223528	175006	147480	273518	242606	252010	278650	423452	340840	190316	168954	184212	117238	100160	153862	87664.7	51950.9	106506	184680	301846	152457	5203488
d__Bacteria	k__unclassified_d__Bacteria	p__Actinomycetota	c__Actinomycetes	o__Mycobacteriales	f__Mycobacteriaceae	g__Mycolicibacterium	19036	21872	15474	174840	139996	150924	143994	185808	122482	161364	157872	163512	56406	50366	40882	39922	23302	60286	19412	19154	27380	30414	18014	14546	36588	35510	37752	28734	39806	44638	142562	132622	140592	172750	185418	127818	18794	155644	45194	21486.7	37171.3	150294	2982048
d__Bacteria	k__unclassified_d__Bacteria	p__Actinomycetota	c__Actinomycetes	o__Micrococcales	f__Cellulomonadaceae	g__Cellulomonas	13074	18878	10590	21110	16616	23112	21726	22986	26694	20802	19312	24348	26900	22620	18560	14920	9556	21244	29454	29914	47258	53868	21054	15566	53018	55978	58546	44322	56616	64864	158668	136386	137208	165242	174086	126738	14180.7	21856.2	18966.7	32852.3	55557.3	149721	1781834
d__Bacteria	k__unclassified_d__Bacteria	p__Actinomycetota	c__Actinomycetes	o__Micrococcales	f__Intrasporangiaceae	g__Phycicoccus	19348	32528	16856	56734	49192	69464	67838	72640	89322	71256	66886	104162	82912	53934	45792	131472	64290	115770	19946	21056	30398	45544	21212	15848	160868	182978	199586	114782	140930	182990	141018	121788	119208	168694	203404	115526	22910.7	71943.8	82361.7	25667.3	163689	144940	3216172
d__Bacteria	k__unclassified_d__Bacteria	p__Candidatus_Aminicenantes	c__unclassified_p__Candidatus_Aminicenantes	o__unclassified_p__Candidatus_Aminicenantes	f__unclassified_p__Candidatus_Aminicenantes	g__unclassified_p__Candidatus_Aminicenantes	209358	143654	184380	162534	140938	174746	193576	208716	189862	226904	251472	192296	214230	213396	172518	195944	224786	179538	148626	121332	145444	75012	114194	82410	322524	252424	252580	709950	342850	686374	120028	118792	113686	122182	127766	127352	179131	193449	200069	114503	427784	121634	7462374
d__Bacteria	k__unclassified_d__Bacteria	p__Actinomycetota	c__Acidimicrobiia	o__Acidimicrobiales	f__Iamiaceae	g__Dermatobacter	14868	13010	13388	70094	61396	70686	69808	77192	61696	70264	69008	71138	74028	54462	46090	29722	14894	32148	76052	79838	118640	119608	53588	45994	168580	163256	173194	92926	166990	152266	120600	112036	110604	125940	138944	113054	13755.3	69031.3	41890.7	82286.7	152869	120196	3046002
d__Bacteria	k__unclassified_d__Bacteria	p__Gemmatimonadota	c__Gemmatimonadetes	o__Gemmatimonadales	f__Gemmatimonadaceae	g__Gemmatimonas	235918	134462	174190	188070	165358	181730	194476	195416	161612	225558	232090	176318	135308	159500	121306	123616	117214	123818	139208	122810	153742	114026	197022	123994	279864	248824	240536	459260	403932	448144	125054	113038	117486	110270	114266	119646	181523	191181	130127	141800	346760	116627	6677082
d__Bacteria	k__unclassified_d__Bacteria	p__Pseudomonadota	c__Gammaproteobacteria	o__Chromatiales	f__Chromatiaceae	g__Thiocapsa	21088	17276	15996	14984	12292	15334	16172	17850	17370	15784	17362	15952	25788	21960	17912	17708	19562	11612	34684	32050	33202	28726	24168	18564	148452	146260	147778	75752	81226	94320	110588	103708	99478	125186	113496	103552	18120	15900	19090.3	28565.7	115631	109335	1833192
d__Bacteria	k__unclassified_d__Bacteria	p__Planctomycetota	c__Planctomycetia	o__Pirellulales	f__Pirellulaceae	g__Rhodopirellula	38072	49616	33698	116322	84380	103062	103486	137216	97942	105442	114132	102430	160554	137418	102006	136022	114952	94548	87744	88606	120882	125322	90040	74226	123178	107740	114014	137338	162702	196104	108754	96890	101444	110204	117334	116764	40462	107157	124250	97803.3	140179	108565	3910584
d__Bacteria	k__unclassified_d__Bacteria	p__Actinomycetota	c__Actinomycetes	o__Jiangellales	f__Jiangellaceae	g__Jiangella	8438	8584	6330	12662	10294	13052	13386	13306	14782	12290	12286	11350	19398	17816	16578	9268	7010	8512	47062	51394	64560	81920	34954	26178	82920	89110	94424	70602	93038	99236	109586	93642	93646	115238	123526	91404	7784	12600.9	13097	51011.3	88221.7	104507	1677782
d__Archaea	k__unclassified_d__Archaea	p__Euryarchaeota	c__Halobacteria	o__unclassified_c__Halobacteria	f__unclassified_c__Halobacteria	g__unclassified_c__Halobacteria	144024	101916	127022	87694	72080	96582	106202	104458	134250	126890	142872	141500	54896	51584	42800	19420	18734	34410	88866	75898	79508	54756	61366	41202	196526	202618	213084	82774	98944	115058	117164	127834	117154	82704	57160	116534	124321	112503	36974	66932.7	151501	103092	3536484
d__Bacteria	k__unclassified_d__Bacteria	p__Pseudomonadota	c__Gammaproteobacteria	o__Chromatiales	f__Chromatiaceae	g__Thiohalocapsa	23506	18500	18080	17504	15192	18282	19508	20796	20026	17986	20044	18976	31214	26008	21858	22916	24666	15486	91522	93422	89508	71814	60556	47384	457160	435924	427950	274650	274900	325054	102798	98100	93724	114770	103584	96606	20028.7	18701.6	23691.3	75701	365940	101597	3629974
d__Bacteria	k__unclassified_d__Bacteria	p__Actinomycetota	c__Acidimicrobiia	o__Acidimicrobiales	f__Iamiaceae	g__Rhabdothermincola	50428	31896	43284	173734	148330	151962	141126	164528	115466	163134	157976	170710	81404	66104	54362	41962	17362	66664	68796	69308	91808	104890	55898	47690	210438	184842	191502	192552	197816	264660	102250	95310	92986	107082	115294	94048	41869.3	154107	54643	73065	206968	101162	4127602
d__Bacteria	k__unclassified_d__Bacteria	p__Bacteroidota	c__Flavobacteriia	o__Flavobacteriales	f__Flavobacteriaceae	g__Lutimonas	48820	40200	42752	874	708	1106	1166	1060	2132	684	976	854	9428	11238	14252	2816	4512	1952	49096	39618	42498	74648	18498	14080	63610	64858	76556	34950	51324	55400	104460	86316	94324	90376	118878	99760	43924	1062.22	7366.33	39739.7	57783	99019	1364780
d__Bacteria	k__unclassified_d__Bacteria	p__Pseudomonadota	c__Gammaproteobacteria	o__Nevskiales	f__Steroidobacteraceae	g__Povalibacter	87028	58120	62204	18604	16490	21324	26842	36048	20504	24278	24164	31662	192498	110586	93248	117098	106902	59438	11900	9794	13006	15316	12368	12534	30350	27812	28048	23774	29910	37028	98806	94036	92382	109232	97326	87164	69117.3	24435.1	113295	12486.3	29487	96491	1937824
d__Bacteria	k__unclassified_d__Bacteria	p__Pseudomonadota	c__Gammaproteobacteria	o__Chromatiales	f__Woeseiaceae	g__Woeseia	604250	527710	436860	143456	123540	145754	164676	184356	157304	132044	144410	119274	186472	141402	154758	190358	178756	81882	407218	279630	440138	790424	540314	614530	311034	364930	343858	267016	405612	389708	114330	100500	111180	72130	67490	105096	522940	146090	155605	512042	347026	95121	9542400
d__Bacteria	k__unclassified_d__Bacteria	p__Actinomycetota	c__Actinomycetes	o__Kitasatosporales	f__Carbonactinosporaceae	g__Carbonactinospora	6148	7740	4596	3620	2928	4192	4546	4622	5022	3876	3726	3654	10962	9046	7288	3600	2842	2648	13238	13234	23394	26054	7958	5938	20868	21312	22808	16448	22622	24388	93336	81076	81992	97630	101624	75022	6161.33	4020.67	6064.33	14969.3	21407.7	88446.7	839998
d__Bacteria	k__unclassified_d__Bacteria	p__Pseudomonadota	c__Alphaproteobacteria	o__Hyphomicrobiales	f__Hyphomicrobiaceae	g__Filomicrobium	38038	48676	33428	106896	82736	111420	122830	145520	123286	117460	118790	119038	88812	67196	48222	78982	56154	55240	142034	130430	155924	163722	107248	78806	164350	161116	161936	118530	172466	192208	84254	79444	78484	86124	97370	91034	40047.3	116442	65767.7	129694	161768	86118.3	3828204
d__Bacteria	k__unclassified_d__Bacteria	p__Actinomycetota	c__Actinomycetes	o__Streptosporangiales	f__Thermomonosporaceae	g__Actinomadura	19998	15648	14668	33926	29490	33652	32480	34848	30528	34082	34006	32736	29744	24354	20070	14358	8314	15340	21876	22002	32558	40740	18480	15194	38384	38796	41390	30492	41902	45464	89448	78124	77900	91916	97022	72450	16771.3	32860.9	18696.7	25141.7	39404.7	84476.7	1352380
d__Bacteria	k__unclassified_d__Bacteria	p__Actinomycetota	c__Actinomycetes	o__Motilibacterales	f__Motilibacteraceae	g__Motilibacter	3594	6978	2510	4014	3312	4178	4682	4518	5188	3486	3302	3584	10796	8292	6666	3728	3214	2836	14798	15598	24836	27934	9096	6820	25338	26972	28610	20782	27774	30712	89140	77236	77278	94232	98490	70266	4360.67	4029.33	5922	16513.7	26698	84440.3	850790
d__Bacteria	k__unclassified_d__Bacteria	p__Bacteroidota	c__Cytophagia	o__Cytophagales	f__Fulvivirgaceae	g__Fulvivirga	21876	10698	17270	6368	5788	11720	17338	34302	9772	5198	5954	6394	17546	10724	8904	10158	16884	7536	38920	28358	40740	49948	42378	33084	90552	79986	81412	77722	129828	135128	100266	83948	90946	64850	81396	83170	16614.7	11426	11958.7	38904.7	99104.7	84096	1557062
d__Bacteria	k__unclassified_d__Bacteria	p__Pseudomonadota	c__Alphaproteobacteria	o__Rhodobacterales	f__Paracoccaceae	g__Defluviimonas	168736	97602	112646	17628	16030	22350	19772	25758	29626	22716	22278	29516	220158	138042	100038	245782	221870	206184	13052	9352	9918	19298	16896	15756	12354	11816	14082	8882	14632	14980	78798	65564	68778	100130	118312	69876	126328	22852.7	188679	14045.3	12791	83576.3	2379208
d__Bacteria	k__unclassified_d__Bacteria	p__Pseudomonadota	c__Gammaproteobacteria	o__Chromatiales	f__Ectothiorhodospiraceae	g__Thiogranum	56048	43264	49018	109516	98408	135336	145698	144704	177732	165664	186218	184510	32878	30976	26220	22788	22970	39334	93270	73564	81580	74790	77980	48796	353256	349340	359264	197502	194366	270824	85960	87792	82880	77398	72270	90724	49443.3	149754	29194.3	74996.7	287425	82837.3	4342838
d__Bacteria	k__unclassified_d__Bacteria	p__Thermodesulfobacteriota	c__Desulfobaccia	o__Desulfobaccales	f__Desulfobaccaceae	g__Desulfobacca	56708	54930	59452	15822	16646	22758	29082	32974	32190	23708	27918	22210	39474	63256	44822	14556	8838	33248	106214	82984	95456	25562	46774	14774	32976	27122	26846	46422	28632	59638	77054	78040	70254	90762	89320	84744	57030	24812	34032.3	61960.7	36939.3	81695.7	1682166
d__Bacteria	k__unclassified_d__Bacteria	p__Planctomycetota	c__Planctomycetia	o__Pirellulales	f__Pirellulaceae	g__Rubripirellula	34464	43984	31896	79538	57330	72858	71866	102936	69446	64894	69610	77566	110228	91920	67468	150494	98574	103586	123886	131824	170860	220190	116180	97640	171728	150540	160682	186132	223478	257420	77308	67846	70908	83114	95444	87342	36781.3	74004.9	103712	143430	191663	80327	3891180
d__Bacteria	k__unclassified_d__Bacteria	p__Actinomycetota	c__Actinomycetes	o__Micromonosporales	f__Micromonosporaceae	g__Micromonospora	17124	14870	12726	33338	30242	33090	28012	29896	26988	35554	35828	33176	30142	27250	21446	16760	10490	18114	21662	21464	30822	38424	17360	14958	37450	38564	40672	29930	40064	45036	82814	71334	71308	86288	89910	67402	14906.7	31791.6	20700.3	24115	38619.3	78176	1300508
d__Bacteria	k__unclassified_d__Bacteria	p__Pseudomonadota	c__Gammaproteobacteria	o__unclassified_c__Gammaproteobacteria	f__unclassified_c__Gammaproteobacteria	g__unclassified_c__Gammaproteobacteria	46376	36018	36178	27146	24030	28858	29964	30656	31764	28946	32146	30412	39322	35738	33508	35952	52824	28890	60686	52866	52038	94724	69726	71606	301016	297274	335818	183268	184512	218838	81872	78410	74174	83412	73592	74790	39524	29324.7	37705.7	66941	253454	77708.3	2997350
d__Bacteria	k__unclassified_d__Bacteria	p__Thermodesulfobacteriota	c__Desulfuromonadia	o__Desulfuromonadales	f__Desulfuromonadaceae	g__Desulfuromonas	87106	273164	92864	102042	84596	102458	92502	73472	164656	113252	146142	92984	74722	70794	58904	100570	176190	100258	60002	44876	54420	48214	51308	53338	60620	57254	57306	87762	95260	95144	88560	82008	86492	64164	59084	83402	151045	108012	96906.3	52026.3	75557.7	77285	3235890
d__Bacteria	k__unclassified_d__Bacteria	p__Thermodesulfobacteriota	c__Desulfobulbia	o__Desulfobulbales	f__Desulfocapsaceae	g__Desulfofustis	13344	13566	11466	23798	19880	33386	36322	26060	80430	25262	36552	31328	30904	25042	19190	24156	20900	13936	207086	174644	166104	328294	81626	152392	325416	414058	431500	154506	226584	282900	82720	72682	76140	76300	74150	78586	12792	34779.8	22354.7	185024	305827	76763	3891210
d__Bacteria	k__unclassified_d__Bacteria	p__Pseudomonadota	c__Alphaproteobacteria	o__Hyphomicrobiales	f__Aestuariivirgaceae	g__Aestuariivirga	47982	41186	33774	13330	10718	11838	11162	14474	10190	17452	17962	18130	183170	111280	93780	55502	54746	30876	10030	9248	12446	11718	11536	9032	14272	10622	12224	9726	17526	15878	74262	64940	70332	88990	89360	68510	40980.7	13917.3	88225.7	10668.3	13374.7	76065.7	1378204
d__Bacteria	k__unclassified_d__Bacteria	p__Thermodesulfobacteriota	c__Desulfobacteria	o__Desulfobacterales	f__Desulfococcaceae	g__Desulfonema	43246	32228	47000	43512	49792	82148	96356	90752	121724	62126	82968	68324	71588	62888	52758	30824	47902	48200	93794	78492	69970	30220	54476	30928	191924	173620	167678	272828	183260	328982	75038	73238	67582	81236	77656	80256	40824.7	77522.4	52360	59646.7	219715	75834.3	3265514
d__Bacteria	k__unclassified_d__Bacteria	p__Pseudomonadota	c__Alphaproteobacteria	o__Hyphomicrobiales	f__Hyphomicrobiaceae	g__Methyloceanibacter	43580	62502	39134	647728	525466	563504	580876	745602	427104	574500	555272	524248	183204	120176	82086	63614	13328	205018	262082	232634	304670	248466	272460	195772	515058	456546	480940	486502	468042	669950	76196	72390	73834	71654	78316	81378	48405.3	571589	111238	252681	512840	75628	11003832
d__Bacteria	k__unclassified_d__Bacteria	p__Candidatus_Latescibacteria	c__unclassified_p__Candidatus_Latescibacteria	o__unclassified_p__Candidatus_Latescibacteria	f__unclassified_p__Candidatus_Latescibacteria	g__unclassified_p__Candidatus_Latescibacteria	101730	76648	82794	120844	106130	127628	137298	147214	133454	157014	169680	134146	117344	109424	83506	87820	85816	92122	85746	74520	95208	58562	80460	66644	137810	118114	118932	203324	142128	220218	75122	71870	70124	73466	75322	76634	87057.3	137045	96005.3	76856.7	156754	73756.3	3914816
d__Bacteria	k__unclassified_d__Bacteria	p__Candidatus_Rokubacteria	c__unclassified_p__Candidatus_Rokubacteria	o__unclassified_p__Candidatus_Rokubacteria	f__unclassified_p__Candidatus_Rokubacteria	g__unclassified_p__Candidatus_Rokubacteria	138024	96026	105148	237720	204632	227184	241784	273726	197396	331158	331818	260654	142434	120574	90062	81648	56872	103180	64868	54578	71030	57620	78516	74702	102846	94444	95582	115068	99524	139732	74622	71872	70616	75604	75714	73994	113066	256230	99128.3	66885.7	107866	73737	4730972
d__Bacteria	k__unclassified_d__Bacteria	p__Bacillota	c__Bacilli	o__Bacillales	f__unclassified_o__Bacillales	g__Exiguobacterium	9816	2622	9196	452	398	596	524	532	730	592	658	870	5460	1340	1006	1146	1166	1014	970	800	1288	2032	1158	670	7468	4876	3474	2444	1740	2212	12034	4276	13338	55054	333320	22862	7211.33	594.667	1855.33	1153	3702.33	73480.7	508134
d__Bacteria	k__unclassified_d__Bacteria	p__Pseudomonadota	c__Betaproteobacteria	o__Burkholderiales	f__Sphaerotilaceae	g__Rubrivivax	201730	121080	140754	37684	35056	43090	45904	62714	39242	49756	51972	58130	164374	98880	84940	108152	133870	50218	17728	15290	20378	18800	19474	17776	33322	30794	31400	30796	32746	41854	76462	73938	73000	78546	67790	68950	154521	47060.9	106739	18241	33485.3	73114.3	2276590
d__Bacteria	k__unclassified_d__Bacteria	p__Actinomycetota	c__Actinomycetes	o__Kineosporiales	f__Kineosporiaceae	g__Kineosporia	6214	8248	4400	16864	10832	14184	12026	14418	10066	7608	6146	8002	12998	10580	8860	5824	4272	4790	15088	15632	23286	28100	11058	7960	26144	27538	29406	20696	28304	31200	76256	66328	66242	81768	84606	61918	6287.33	11127.3	7887.33	16854	27214.7	72853	867862
d__Bacteria	k__unclassified_d__Bacteria	p__Actinomycetota	c__Actinomycetes	o__Pseudonocardiales	f__Pseudonocardiaceae	g__Pseudonocardia	18552	15754	13452	36750	31772	36488	36422	39180	33434	40410	38352	36338	33868	27630	21746	17944	9854	17824	23868	23532	33484	43178	20662	18194	42074	43622	46298	33908	45206	50060	76060	66454	66468	78866	84330	63386	15919.3	36571.8	21477.7	27153	43528	72594	1365420
d__Bacteria	k__unclassified_d__Bacteria	p__Candidatus_Hydrogenedentes	c__unclassified_p__Candidatus_Hydrogenedentes	o__unclassified_p__Candidatus_Hydrogenedentes	f__unclassified_p__Candidatus_Hydrogenedentes	g__unclassified_p__Candidatus_Hydrogenedentes	50810	40088	40126	66526	54464	66406	72504	79532	71782	84240	91410	72448	75390	66866	51814	55840	61956	51134	45374	38270	58542	33726	53848	34492	66878	57812	59264	89356	69388	103930	76850	71256	71032	64414	66048	78120	43674.7	73256.9	60500	44042	74438	71286.7	2291936
d__Bacteria	k__unclassified_d__Bacteria	p__Actinomycetota	c__Actinomycetes	o__Jiangellales	f__Jiangellaceae	g__Phytoactinopolyspora	7960	7040	5852	9254	7936	9962	10250	9560	11352	8780	8938	7986	15438	14268	14012	8114	5686	7220	33728	36794	45550	57688	25426	18842	58456	62438	65548	48900	66862	70288	72546	62788	61742	77516	82784	61874	6950.67	9335.33	10789.7	36338	62082	69875	1179378
d__Bacteria	k__unclassified_d__Bacteria	p__Candidatus_Eisenbacteria	c__unclassified_p__Candidatus_Eisenbacteria	o__unclassified_p__Candidatus_Eisenbacteria	f__unclassified_p__Candidatus_Eisenbacteria	g__unclassified_p__Candidatus_Eisenbacteria	112136	80462	88808	116398	97622	118226	129386	142074	117300	165990	175020	135920	110580	105164	85490	85018	87076	91412	61910	52710	66016	50466	76062	62974	118128	99442	99384	199296	128524	208828	68692	65368	63644	69444	69482	67838	93802	133104	94123.3	61689.7	142267	67411.3	3672290
d__Bacteria	k__unclassified_d__Bacteria	p__Planctomycetota	c__Planctomycetia	o__Pirellulales	f__Pirellulaceae	g__Candidatus_Anammoximicrobium	10768	14882	9350	32498	23114	29956	30874	39514	31322	32348	35302	29410	86658	73286	53424	51086	66268	34036	22226	22882	28294	24762	21290	15346	40190	38048	37672	66604	74590	69712	70256	61352	64322	66406	64184	67216	11666.7	31593.1	60793	22466.7	54469.3	65622.7	1539448
d__Bacteria	k__unclassified_d__Bacteria	p__Actinomycetota	c__Actinomycetes	o__Motilibacterales	f__Vallicoccaceae	g__Vallicoccus	2230	5678	1608	1882	1326	2142	2602	2336	2790	1480	1378	1636	8200	6466	5374	2554	2404	1524	11590	11696	18418	20918	6992	5066	19434	20544	21486	15966	21764	22856	68836	60948	60490	72026	76420	54950	3172	1952.44	4420.33	12446.7	20341.7	65611.7	644010
d__Bacteria	k__unclassified_d__Bacteria	p__Actinomycetota	c__Actinomycetes	o__unclassified_c__Actinomycetes	f__unclassified_c__Actinomycetes	g__unclassified_c__Actinomycetes	17984	15234	12470	29294	25710	29334	28702	31148	24438	28498	27872	24268	34626	25440	21342	13090	5858	11950	16132	15236	22678	34870	15914	14496	22870	23466	25358	14442	24662	23792	66414	58728	59274	69736	73930	54640	15229.3	27696	18717.7	19887.7	22431.7	63787	1043896
d__Bacteria	k__unclassified_d__Bacteria	p__Actinomycetota	c__Actinomycetes	o__Micrococcales	f__Cellulomonadaceae	g__Actinotalea	6768	8066	4908	14476	13498	21098	22604	18976	34484	20868	20116	30470	18176	14504	11532	10518	5720	10408	16498	17046	25262	31188	11880	8922	31476	33596	35620	25374	33716	37612	65278	56714	56292	67800	72762	52778	6580.67	21843.3	11809.7	18466	32899	61937.3	967004
d__Bacteria	k__unclassified_d__Bacteria	p__Actinomycetota	c__Actinomycetes	o__Propionibacteriales	f__Propionibacteriaceae	g__Brooklawnia	2486	3320	2262	290	280	380	346	376	466	486	478	496	698	548	422	408	272	350	322	426	508	616	288	254	1164	1096	1174	1352	1198	2890	56452	52790	56888	70862	71266	58972	2689.33	399.778	449.667	402.333	1479	61205	392882
d__Bacteria	k__unclassified_d__Bacteria	p__Pseudomonadota	c__Alphaproteobacteria	o__Sphingomonadales	f__Sphingomonadaceae	g__Novosphingobium	106288	34694	75170	69704	67998	101788	67214	68392	60058	77262	85108	88024	48506	35976	53134	37192	19410	47304	8934	7278	8856	10852	11378	10110	21690	22764	24326	14782	21616	23160	62216	56454	59688	60268	66732	60316	72050.7	76172	40253.7	9568	21389.7	60945.7	1694642
d__Bacteria	k__unclassified_d__Bacteria	p__Actinomycetota	c__Actinomycetes	o__Micrococcales	f__Intrasporangiaceae	g__Tetrasphaera	8900	12322	6346	12384	10532	14728	13862	13368	18920	13044	14060	15960	20902	15760	13744	121684	98650	79372	11916	12314	18044	22558	9540	7512	33540	35752	39158	24384	31998	38958	63490	53916	53354	67266	74044	51376	9189.33	14095.3	58352	13647.3	33965	60574.3	1153658
d__Bacteria	k__unclassified_d__Bacteria	p__Actinomycetota	c__Actinomycetes	o__Micrococcales	f__Microbacteriaceae	g__Microbacterium	14270	13550	11858	65020	98480	147772	83234	83010	111936	103748	75604	171472	107074	39856	56468	53104	11210	89250	16236	15772	23314	27968	15030	12242	35864	37834	39716	32604	37830	46516	61656	54596	55634	67590	70654	52998	13226	104475	59493.7	18427	38394	60521.3	2040970
d__Bacteria	k__unclassified_d__Bacteria	p__Pseudomonadota	c__Gammaproteobacteria	o__Chromatiales	f__Sedimenticolaceae	g__Candidatus_Thiodiazotropha	37518	29170	30774	30888	26754	33024	33308	34462	36596	33046	37376	34166	35872	33036	28358	27750	36856	22020	36388	30928	35732	44656	38820	36232	123936	122306	132158	73130	76954	91332	63262	60390	58160	62994	55676	58402	32487.3	33291.1	30648.7	37126	103303	59814	1782430
d__Bacteria	k__unclassified_d__Bacteria	p__Bacteroidota	c__Saprospiria	o__Saprospirales	f__Haliscomenobacteraceae	g__Phaeodactylibacter	55252	25048	35420	13552	12638	17460	17148	18502	18862	15232	16400	16898	85206	50912	43086	105026	158402	79916	39490	51298	53186	38964	36188	25430	48638	41106	42450	52608	93856	71670	68996	61938	67674	50964	45216	62500	38573.3	16299.1	87091.3	40759.3	58388	59548	1737132
d__Bacteria	k__unclassified_d__Bacteria	p__Pseudomonadota	c__Gammaproteobacteria	o__Pseudomonadales	f__Pseudomonadaceae	g__Pseudomonas	55070	42146	42036	44918	41764	48220	47406	53510	43232	44272	46376	44612	71288	51640	51852	46840	49264	36184	33360	28086	36846	39362	39602	37106	56574	53392	56530	44104	51938	59646	62580	59756	59602	59328	57260	57590	46417.3	46034.4	51178	35727	53697.3	59352.7	1753292
d__Bacteria	k__unclassified_d__Bacteria	p__Nitrospirota	c__Nitrospiria	o__Nitrospirales	f__Nitrospiraceae	g__Nitrospira	97032	79876	85964	331000	277044	260032	261068	307620	195574	328220	344536	261986	134240	125098	115832	117930	77992	154136	89660	62884	73704	45210	101182	90176	77132	71804	73138	77756	67336	95450	60106	57958	56722	60458	57494	60712	87624	285231	120871	77136	77102.7	58908.3	4834062
d__Bacteria	k__unclassified_d__Bacteria	p__Pseudomonadota	c__Alphaproteobacteria	o__Rhodobacterales	f__Roseobacteraceae	g__Roseobacter	9784	7406	7376	7616	6400	8628	8164	11802	7584	7544	7182	9118	9660	5704	4884	5626	5640	4456	27474	24620	30958	37856	19704	17626	17148	15018	17164	12018	26356	21532	73168	51760	65142	43910	50752	66662	8188.67	8226.44	5995	26373	18206	58565.7	753442
d__Bacteria	k__unclassified_d__Bacteria	p__Candidatus_Marinimicrobia	c__unclassified_p__Candidatus_Marinimicrobia	o__unclassified_p__Candidatus_Marinimicrobia	f__unclassified_p__Candidatus_Marinimicrobia	g__unclassified_p__Candidatus_Marinimicrobia	94930	75318	78080	97368	86494	103890	109776	115324	112372	118502	129982	104570	91662	80256	61822	67698	84984	67154	67834	59390	75590	52902	65068	54242	128370	110082	110816	240166	143446	203282	59438	58328	56350	56424	56436	60580	82776	108698	75596	62504.3	156027	57926	3338926
d__Bacteria	k__unclassified_d__Bacteria	p__Actinomycetota	c__Actinomycetes	o__Micrococcales	f__Demequinaceae	g__Demequina	9358	12974	20842	54550	98688	188888	81156	76710	115264	101562	77150	197522	101958	19428	43870	17028	5380	49656	15170	15250	22372	28426	11318	8862	27350	28740	31120	21634	29518	33338	60700	52288	52876	62088	68248	49368	14391.3	110166	39553.3	16899.7	28616.7	57594.7	1890650
d__Bacteria	k__unclassified_d__Bacteria	p__Actinomycetota	c__Actinomycetes	o__Mycobacteriales	f__Nocardiaceae	g__Rhodococcus	8384	8764	6606	19458	16160	19694	19060	20202	17542	19030	19098	18974	17606	14368	11620	10180	7174	10458	14030	13864	21736	25016	11030	9076	26284	27070	28532	20786	27278	30914	59790	51918	51972	63226	68924	49422	7918	18802	11901	15792	26810.7	57542	865246
d__Bacteria	k__unclassified_d__Bacteria	p__Myxococcota	c__unclassified_p__Myxococcota	o__Polyangiales	f__Sandaracinaceae	g__Sandaracinus	46126	37914	33974	131372	110076	119670	112240	126962	108420	118566	101682	104486	55570	95432	81360	120170	147932	98498	57572	48460	79198	97056	65878	54876	50574	40220	42408	88100	83838	86786	59676	55818	57528	52564	60040	57548	39338	114830	99827	67173.3	65321	57195.7	2888590
d__Bacteria	k__unclassified_d__Bacteria	p__Pseudomonadota	c__Alphaproteobacteria	o__Hyphomicrobiales	f__Phyllobacteriaceae	g__Nitratireductor	41522	39240	32640	167368	130566	160798	178312	237820	148124	190312	185994	194868	150880	92228	70014	73768	66992	65152	43948	33266	37330	54430	64306	36270	100802	96910	104324	61588	105518	110152	52978	47190	49406	64574	69254	52378	37800.7	177129	86505.7	44925	96549	55963.3	3411222
d__Bacteria	k__unclassified_d__Bacteria	p__Actinomycetota	c__Actinomycetes	o__Geodermatophilales	f__Geodermatophilaceae	g__Blastococcus	12522	10004	9194	18746	15618	18944	19264	19768	17808	19384	18234	18318	19444	15942	12904	10248	6176	10934	15160	14668	21668	28678	12674	10294	26302	26450	28854	20858	28460	31538	57446	50920	49720	58990	63914	47556	10573.3	18453.8	12608	17190.3	27077	54757.7	867602
d__Bacteria	k__unclassified_d__Bacteria	p__Thermodesulfobacteriota	c__Desulfomonilia	o__Desulfomonilales	f__Desulfomonilaceae	g__Desulfomonile	18990	19590	19456	13744	19834	19850	23288	24406	29324	21366	25370	19982	20538	36672	18152	12368	11490	22964	56298	46152	58780	18244	25512	11012	77016	64412	67922	85700	50106	121756	48548	53634	46954	59466	58962	57194	19345.3	21907.1	20364	35999.7	77818.7	54126.3	1385052
d__Bacteria	k__unclassified_d__Bacteria	p__Pseudomonadota	c__Betaproteobacteria	o__Burkholderiales	f__Burkholderiaceae	g__Quisquiliibacterium	59688	34192	38664	1882	1714	1934	2230	2656	2226	2756	3390	3092	18504	10742	8222	10478	13788	4186	732	716	752	794	994	794	1314	1150	1296	1160	1546	1902	57784	59726	55486	55906	43242	44958	44181.3	2431.11	10986.7	797	1394.67	52850.3	550596
d__Bacteria	k__unclassified_d__Bacteria	p__Pseudomonadota	c__Gammaproteobacteria	o__Cellvibrionales	f__Halieaceae	g__Haliea	36132	27658	27316	35378	33058	43754	41970	46040	42308	35456	40054	37172	29514	25166	22086	21640	25590	17706	63644	57236	66638	87976	50068	48008	175542	190352	194752	129738	160030	160986	60986	57404	57726	43870	43344	53390	30368.7	39465.6	23617	62261.7	168567	52786.7	2289688
d__Bacteria	k__unclassified_d__Bacteria	p__Candidatus_Omnitrophota	c__unclassified_p__Candidatus_Omnitrophota	o__unclassified_p__Candidatus_Omnitrophota	f__unclassified_p__Candidatus_Omnitrophota	g__unclassified_p__Candidatus_Omnitrophota	75662	54476	62574	77314	67654	85360	93324	100120	96864	107822	122122	96486	78802	70702	54422	58920	63838	61222	54642	46874	57810	34270	46796	36848	80846	70596	71442	123830	80202	133998	51992	50882	49454	51812	53738	54414	64237.3	94118.4	64651	46206.7	93485.7	52048.7	2578130
d__Bacteria	k__unclassified_d__Bacteria	p__Chloroflexota	c__Anaerolineae	o__Anaerolineales	f__Anaerolineaceae	g__Longilinea	77390	62466	67320	62290	61542	87100	94970	93066	111128	85276	103794	89720	130692	113888	77500	137008	139660	109342	43504	38184	51480	17778	17980	12922	42212	33334	34592	39556	24188	57906	50890	51282	47408	52108	54334	55874	69058.7	87654	118015	30308	38631.3	51982.7	2429684
d__Bacteria	k__unclassified_d__Bacteria	p__Pseudomonadota	c__Alphaproteobacteria	o__Rhodobacterales	f__Roseobacteraceae	g__Ruegeria	39874	32478	29778	36168	29284	35836	35628	43882	31948	32584	34146	34330	41130	24384	20570	25854	25380	20302	33690	27074	32956	49282	36404	32698	44118	41786	45742	29740	44336	47292	55652	44594	49690	48380	60330	51022	34043.3	34867.3	26270	35350.7	42169	51611.3	1348342
d__Bacteria	k__unclassified_d__Bacteria	p__Pseudomonadota	c__Gammaproteobacteria	o__Chromatiales	f__Chromatiaceae	g__Thiodictyon	8062	7422	6374	3856	3364	4030	4502	4586	4664	4556	4750	4594	8246	6642	5386	5224	5454	3380	8642	8110	8634	6966	5618	4344	59178	63860	61716	21702	21946	25244	49670	46856	45414	62290	54828	48888	7286	4322.44	5722	7052.33	42274.3	51324.3	698998
d__Bacteria	k__unclassified_d__Bacteria	p__Chloroflexota	c__Chloroflexia	o__Chloroflexales	f__Roseiflexaceae	g__Kouleothrix	37128	31700	30830	56824	52822	66822	67316	65156	77346	62476	72484	64002	78892	71498	48954	53062	40186	49574	31436	30002	38976	27230	18848	16770	62260	56170	56722	46288	40576	64182	50048	48348	49394	53072	53850	51746	33219.3	65027.6	57027.7	27210.3	54366.3	51076.3	1822990
d__Bacteria	k__unclassified_d__Bacteria	p__Planctomycetota	c__Planctomycetia	o__Pirellulales	f__Pirellulaceae	g__Blastopirellula	16320	18980	13436	57620	42200	51902	48634	67786	45104	46306	49580	46430	128578	88898	66742	62158	68980	56978	23926	24086	32294	34554	28620	24412	35382	31046	32706	36626	46556	54216	51304	45120	48448	52862	55390	53152	16245.3	50618	78722.3	27982	39422	51046	1687332
d__Bacteria	k__unclassified_d__Bacteria	p__Actinomycetota	c__Actinomycetes	o__Micromonosporales	f__Micromonosporaceae	g__Actinoplanes	10588	9764	7624	17266	14560	17688	17370	17858	16988	18180	17842	17494	17874	15184	12644	9694	6120	9450	14264	13862	20336	25302	11412	9428	25178	26080	27032	20834	26674	29640	53476	46534	46776	55790	59376	44168	9325.33	17249.6	11827.7	15767.3	25906.3	51020	810350
d__Bacteria	k__unclassified_d__Bacteria	p__Pseudomonadota	c__Gammaproteobacteria	o__Chromatiales	f__Chromatiaceae	g__Candidatus_Thiosymbion	5018	4370	3938	2878	2534	3048	3112	3214	3562	3272	3438	3392	4844	4558	3780	3208	4054	2076	8896	8274	9112	6882	5226	4646	37326	34896	36252	19972	20622	22184	53820	49916	47624	57232	49822	47530	4442	3161.11	3753.33	7172.67	28542	50990.7	584528
d__Bacteria	k__unclassified_d__Bacteria	p__Pseudomonadota	c__Gammaproteobacteria	o__Chromatiales	f__Chromatiaceae	g__Lamprocystis	5686	4646	4370	3060	2754	3062	3242	3722	3664	3304	3628	3500	6082	5022	3896	3574	4090	2322	6562	6098	6114	4866	4138	3568	58004	64402	61582	17000	17068	20136	49216	45620	44224	60932	54650	48890	4900.67	3326.22	4164.33	5224.33	39698.7	50588.7	642694
d__Bacteria	k__unclassified_d__Bacteria	p__Pseudomonadota	c__Alphaproteobacteria	o__Hyphomicrobiales	f__Nitrobacteraceae	g__Bradyrhizobium	47256	41904	38064	194920	154000	172234	189064	246928	141508	215904	207968	194206	88718	66324	49476	44612	32334	54326	40376	34968	44024	43060	49800	41796	56836	54382	56046	44242	55942	65288	50168	47076	46946	51356	53426	48780	42408	190748	55965	42337.3	55456	49625.3	3064258
d__Bacteria	k__unclassified_d__Bacteria	p__Candidatus_Bipolaricaulota	c__unclassified_p__Candidatus_Bipolaricaulota	o__unclassified_p__Candidatus_Bipolaricaulota	f__unclassified_p__Candidatus_Bipolaricaulota	g__unclassified_p__Candidatus_Bipolaricaulota	52978	43198	45082	52730	49340	63362	66124	65160	73800	65194	74494	62702	65416	66602	46032	46520	37388	48368	45036	41060	53438	32740	25014	20856	68048	57936	57518	194174	73954	114734	47106	47256	44518	50032	50830	48598	47086	63656.2	51721	36357.3	94394	48056.7	2097338
d__Bacteria	k__unclassified_d__Bacteria	p__Actinomycetota	c__Actinomycetes	o__Propionibacteriales	f__Kribbellaceae	g__Kribbella	9532	8220	6960	14810	12630	15372	15046	15860	14806	15740	15226	14676	16412	13254	10920	8718	5138	9212	13528	13686	20264	24880	11178	8990	24894	25872	26538	19880	25806	28862	49240	43298	43724	52102	55558	41624	8237.33	14907.3	10609	15421	25308.7	47591	752456
d__Bacteria	k__unclassified_d__Bacteria	p__Actinomycetota	c__Actinomycetes	o__Propionibacteriales	f__Nocardioidaceae	g__Marmoricola	7766	7882	5866	8230	7646	9296	8962	9570	9348	9192	8914	10318	11496	9006	7690	11012	5260	14282	10242	10628	15390	19356	8320	6200	19294	20522	21706	15102	20166	22904	49396	42700	42534	51950	55316	40352	7171.33	9052.89	9791	11689.3	19949	47041.3	633814
d__Bacteria	k__unclassified_d__Bacteria	p__Candidatus_Dadabacteria	c__unclassified_p__Candidatus_Dadabacteria	o__unclassified_p__Candidatus_Dadabacteria	f__unclassified_p__Candidatus_Dadabacteria	g__unclassified_p__Candidatus_Dadabacteria	109908	59538	82150	220652	175626	156172	150796	209374	92834	228370	231530	198720	90256	62290	53318	44464	31578	78348	28636	22462	30750	19030	57112	55834	29774	26240	26774	36072	28182	42282	46990	44096	46614	43266	47880	52688	83865.3	184897	60042.3	35637.3	31554	46922.3	2960606
d__Bacteria	k__unclassified_d__Bacteria	p__Candidatus_Poribacteria	c__unclassified_p__Candidatus_Poribacteria	o__unclassified_p__Candidatus_Poribacteria	f__unclassified_p__Candidatus_Poribacteria	g__unclassified_p__Candidatus_Poribacteria	50188	41292	42162	69372	63012	77142	80530	85590	83984	88096	94394	78964	74524	65560	49208	49530	43880	50424	50126	43914	58076	36288	38478	33932	80918	71670	72426	102300	74938	121324	47214	45832	43752	47908	48160	48592	44547.3	80120.4	55521	43469	87262.7	46909.7	2253700
d__Bacteria	k__unclassified_d__Bacteria	p__Actinomycetota	c__Thermoleophilia	o__Solirubrobacterales	f__Conexibacteraceae	g__Conexibacter	16180	14858	12856	78708	73300	42912	27504	33602	22510	39564	33774	27780	20066	16492	13298	15972	11770	15114	18334	17738	25362	26704	16978	14626	31666	27680	29976	26212	31066	42622	46760	44638	42434	49762	49070	43434	14631.3	42183.8	15452	19957	31537	46016.3	1101322
d__Bacteria	k__unclassified_d__Bacteria	p__Chloroflexota	c__Anaerolineae	o__Anaerolineales	f__Anaerolineaceae	g__Bellilinea	72702	57368	62086	53716	52320	75372	81740	82274	94340	73702	89212	78188	112960	96512	65548	114814	119504	91780	37754	33574	45630	15304	15526	11846	32506	25656	26960	29472	18848	44302	44338	44902	41138	45402	47870	48890	64052	75651.6	100186	26605.7	29624	45423.3	2084056
d__Bacteria	k__unclassified_d__Bacteria	p__Pseudomonadota	c__Alphaproteobacteria	o__Rhodospirillales	f__Rhodospirillaceae	g__Defluviicoccus	8894	7216	6598	38756	32712	31350	30918	36888	22472	28594	28718	24458	16836	13942	10594	6938	4714	9348	11502	9768	13328	9688	25458	19904	15916	14188	14004	14178	14422	21180	43904	40934	47588	51392	49104	38654	7569.33	30540.7	10395.3	14941.3	15648	45262.7	815058
d__Archaea	k__unclassified_d__Archaea	p__Candidatus_Bathyarchaeota	c__unclassified_p__Candidatus_Bathyarchaeota	o__unclassified_p__Candidatus_Bathyarchaeota	f__unclassified_p__Candidatus_Bathyarchaeota	g__unclassified_p__Candidatus_Bathyarchaeota	94584	59370	89456	55764	60042	69984	74824	72424	83010	68528	81792	68526	61422	60384	42288	42694	37926	50442	92574	61284	82022	40218	31234	20802	106044	94520	93562	124868	76704	140508	43996	44664	41282	46624	46714	47542	81136.7	70543.8	49192.7	54689	106034	45137	2408622
d__Bacteria	k__unclassified_d__Bacteria	p__Bacteroidota	c__Bacteroidia	o__Bacteroidales	f__Bacteroidaceae	g__Bacteroides	69302	67468	66700	15438	13850	23004	21732	15324	38284	14862	19564	16870	39952	28808	23956	62890	146726	33970	27528	27100	31892	49752	16584	9772	392906	433862	434422	419566	352914	448002	47514	42182	42330	41700	49508	47054	67823.3	19880.9	56050.3	27104.7	413612	45048	3633288
d__Bacteria	k__unclassified_d__Bacteria	p__Pseudomonadota	c__Alphaproteobacteria	o__Hyphomicrobiales	f__Phyllobacteriaceae	g__Mesorhizobium	44906	33332	34772	119626	97856	109088	112420	139452	90566	114040	114530	108382	83836	59068	45516	44458	36538	45530	32004	23908	32242	30408	68200	39286	38094	35874	38422	29146	38688	44412	43228	39182	39932	47734	51150	42334	37670	111773	52491	37674.7	37439.3	43926.7	2148160
d__Bacteria	k__unclassified_d__Bacteria	p__Actinomycetota	c__Actinomycetes	o__Propionibacteriales	f__Nocardioidaceae	g__Aeromicrobium	11020	9470	7860	9072	7682	9660	9546	9856	9974	9852	9708	9758	17858	14230	11810	19666	13814	19180	20584	15790	20756	24906	9420	7540	17688	17742	18768	13766	18286	21278	46442	40700	40348	47550	49674	38456	9450	9456.44	16093	16499.3	17921.3	43861.7	679710
d__Bacteria	k__unclassified_d__Bacteria	p__Pseudomonadota	c__Alphaproteobacteria	o__Hyphomicrobiales	f__Methylocystaceae	g__Methylocystis	8266	11448	6750	17436	14286	18706	22618	26620	22960	38122	38070	35264	10884	8096	5876	6532	4500	13882	4296	3846	4790	4874	5354	4134	5860	5450	5762	4974	6256	7934	45930	41418	39496	48996	44514	40092	8821.33	26009.1	8295	4549	6039.33	43407.7	634292
d__Bacteria	k__unclassified_d__Bacteria	p__Thermodesulfobacteriota	c__Desulfobacteria	o__Desulfobacterales	f__Desulfosarcinaceae	g__Desulfatitalea	17962	14010	16848	90634	72894	113254	142372	71650	205902	78406	151148	81208	43302	39424	33232	22100	32924	26210	43412	36198	34214	16286	26176	18598	119542	110200	110304	143012	109820	183976	42900	42524	39704	46196	44080	45040	16273.3	111941	32865.3	29147.3	129476	43407.3	2465662
d__Bacteria	k__unclassified_d__Bacteria	p__Pseudomonadota	c__Alphaproteobacteria	o__Rhodobacterales	f__Paracoccaceae	g__Limibaculum	88644	52358	62240	30248	24132	29968	28738	38512	29924	30592	31434	36342	129754	94696	83414	177054	160694	122386	17540	13116	17810	17332	31502	32384	11030	10174	11124	7438	13188	12340	44802	43508	42788	37284	36942	44176	67747.3	31098.9	128000	21614	10882.3	41583.3	1695608
d__Bacteria	k__unclassified_d__Bacteria	p__Actinomycetota	c__Actinomycetes	o__Streptosporangiales	f__Streptosporangiaceae	g__Nonomuraea	11940	9430	8770	15480	13112	15842	15818	16954	15030	16680	17154	15772	17798	14720	11718	9354	5870	9004	11058	10752	15706	19990	10148	8278	20226	20636	21948	16584	22252	24360	42460	36930	37492	45124	47670	35202	10046.7	15760.2	11410.7	12655.3	21001	40813	687262
d__Bacteria	k__unclassified_d__Bacteria	p__Actinomycetota	c__Actinomycetes	o__Micrococcales	f__Micrococcaceae	g__Arthrobacter	7356	7786	5994	14752	12716	16566	16068	16590	17704	16754	16508	18912	18072	13270	10596	14726	8158	14942	9400	8688	13674	16216	7486	6108	21130	22270	24224	16180	20114	24782	41116	36246	36428	43658	51238	34536	7045.33	16285.6	13294	10262	21450	40537	680964
d__Bacteria	k__unclassified_d__Bacteria	p__Actinomycetota	c__Actinomycetes	o__Propionibacteriales	f__Nocardioidaceae	g__Micropruina	1782	3046	1368	1868	1636	2170	2262	2266	2444	2340	2356	2698	3734	2790	2324	2180	1508	2092	2820	3048	4128	4990	2032	1660	5876	6194	6370	4732	5890	7684	36802	32548	39094	51254	49574	33360	2065.33	2226.67	2438	3113	6124.33	40438.7	338920
d__Bacteria	k__unclassified_d__Bacteria	p__Pseudomonadota	c__Gammaproteobacteria	o__Chromatiales	f__Chromatiaceae	g__Thiocystis	7170	6056	5506	4104	3322	4124	4410	4588	5124	4648	4808	4898	7956	6872	5756	5136	6400	3416	9060	8360	9092	9068	6392	5738	48044	48482	48198	23390	23234	27668	40676	37952	36472	46854	42056	38314	6244	4447.33	5922.67	7951.67	36502.7	40387.3	603344
d__Bacteria	k__unclassified_d__Bacteria	p__Acidobacteriota	c__Thermoanaerobaculia	o__Thermoanaerobaculales	f__Thermoanaerobaculaceae	g__Thermoanaerobaculum	42826	29406	34570	20740	15984	19096	19778	22442	20600	25548	30592	21182	85508	92446	84486	97954	125560	73728	26904	24138	22766	13918	30900	22770	128126	88528	89838	296116	139888	252960	38564	37832	37492	40300	44420	40810	35600.7	21773.6	93280.3	23566	165909	39903	2238716
d__Bacteria	k__unclassified_d__Bacteria	p__Chloroflexota	c__Anaerolineae	o__Anaerolineales	f__Anaerolineaceae	g__Thermanaerothrix	64880	49326	55210	49612	48674	70060	75780	76894	87300	70120	84502	73302	86526	80112	52004	82458	75454	76052	36782	32412	43186	13664	14816	11644	32060	24272	26102	30132	18034	44528	38964	38878	36920	40040	41198	42664	56472	70693.8	75434.3	25417.3	29188	39777.3	1824562
d__Bacteria	k__unclassified_d__Bacteria	p__Actinomycetota	c__Actinomycetes	o__Geodermatophilales	f__Geodermatophilaceae	g__Geodermatophilus	7992	6636	5554	11234	9490	10898	11184	11830	11286	11608	11268	11070	12038	9826	8106	6096	3946	6460	12474	12088	17570	21156	9680	7562	20520	22364	22750	17038	22368	24726	41428	36850	36538	43032	45948	34016	6727.33	11096.4	7745.33	13421.7	21627.7	39635.3	614630
d__Bacteria	k__unclassified_d__Bacteria	p__Pseudomonadota	c__Alphaproteobacteria	o__Sphingomonadales	f__Erythrobacteraceae	g__Qipengyuania	13352	4606	10816	2510	2902	4690	3524	4634	3856	3910	3374	6066	9470	5550	4680	24378	22178	24614	5304	3270	2674	7654	5108	6954	3950	3054	3286	2834	4430	4166	24876	18758	20444	64262	84826	19190	9591.33	3940.67	15145	5160.67	3620	38726	440150
d__Bacteria	k__unclassified_d__Bacteria	p__Pseudomonadota	c__Gammaproteobacteria	o__Chromatiales	f__unclassified_o__Chromatiales	g__Thiohalobacter	31190	23292	25408	59300	48598	57306	54958	56404	58618	58808	63300	59714	25028	20678	19626	20284	22488	20998	28308	23260	27014	26178	32090	26500	57150	56780	58428	35150	40940	46276	41618	41582	40194	37594	32494	38858	26630	57445.1	21517	27225	49120.7	38723.3	1416412
d__Bacteria	k__unclassified_d__Bacteria	p__Actinomycetota	c__Actinomycetes	o__Micrococcales	f__Bogoriellaceae	g__Georgenia	7146	7360	4888	6474	5440	7602	7436	7362	8566	7278	7696	7784	18490	14880	10996	12770	6054	10982	8978	8840	13332	16070	6770	5162	15476	16648	17266	12448	15964	18814	38306	33304	33410	39248	43252	31456	6464.67	7293.11	12362	9858.67	16102.7	36496	533948
d__Bacteria	k__unclassified_d__Bacteria	p__Actinomycetota	c__Rubrobacteria	o__Gaiellales	f__Gaiellaceae	g__Gaiella	39330	35156	32658	141716	107678	122922	142784	178090	94820	256174	218804	182128	48828	38144	21204	16868	5338	26866	8184	6988	10806	9922	15748	20282	10866	10282	10864	9512	11248	14688	37282	36564	34294	35554	36874	35906	35714.7	160568	26208	11988.3	11243.3	36079	2065372
d__Bacteria	k__unclassified_d__Bacteria	p__Pseudomonadota	c__Alphaproteobacteria	o__Rhodobacterales	f__Roseobacteraceae	g__Sulfitobacter	22378	17346	17904	21934	18886	24270	23436	28808	23314	21188	21050	23546	27098	17626	15200	15968	16724	13774	26762	21700	26116	35740	25156	23050	35800	34800	36226	25012	32662	34444	39356	32224	35492	33078	36414	36782	19209.3	22936.9	17731.7	26420.7	33157.3	35557.7	941264
d__Bacteria	k__unclassified_d__Bacteria	p__Cyanobacteriota	c__Cyanophyceae	o__Synechococcales	f__Prochlorococcaceae	g__Cyanobium	2738	2676	2324	3672	3140	3636	4074	4190	3778	4012	4280	3926	18502	12170	12260	15838	9410	10490	145678	142264	137570	148794	146482	96382	48296	32662	35110	43722	94444	70338	34744	34670	30996	40606	39518	31122	2579.33	3856.44	13111.7	136195	54095.3	35276	1474514
d__Bacteria	k__unclassified_d__Bacteria	p__Actinomycetota	c__Rubrobacteria	o__Rubrobacterales	f__Rubrobacteraceae	g__Rubrobacter	37086	29264	30224	51354	45188	53072	54524	55914	55806	61770	64620	55364	51662	44406	32742	32746	22444	31894	24614	22570	29750	28784	21836	20178	44250	40958	42732	36738	34416	49084	35870	33862	32522	36782	36996	35588	32191.3	55290.2	35982.3	24622	41363	35270	1417610
d__Bacteria	k__unclassified_d__Bacteria	p__Candidatus_Binatota	c__Candidatus_Binatia	o__unclassified_c__Candidatus_Binatia	f__unclassified_c__Candidatus_Binatia	g__unclassified_c__Candidatus_Binatia	88288	53598	61702	188978	165942	177922	186064	227636	131526	259700	253568	187274	65066	60886	44756	50672	30226	72586	29732	25766	36466	30460	39402	39464	42656	39424	41218	46956	45432	56130	36064	33870	33280	35570	36958	34500	67862.7	197623	54032	33548.3	45302.7	35040.3	2989738
d__Bacteria	k__unclassified_d__Bacteria	p__Actinomycetota	c__Actinomycetes	o__Frankiales	f__Frankiaceae	g__Frankia	14084	10806	10322	33244	27892	31504	30642	33736	27118	32426	31596	32756	18648	15246	12136	9336	4280	12296	10634	10030	15072	17386	9444	8680	24764	24098	24510	19316	24868	28332	36674	32036	32386	38066	39490	30840	11737.3	31212.7	11990.3	11874.3	24314.7	34915.3	814694
d__Bacteria	k__unclassified_d__Bacteria	p__Candidatus_Melainabacteria	c__unclassified_p__Candidatus_Melainabacteria	o__Candidatus_Obscuribacterales	f__unclassified_o__Candidatus_Obscuribacterales	g__unclassified_o__Candidatus_Obscuribacterales	37158	25342	26568	10132	8878	10952	12524	16692	10246	11818	12398	11276	72132	42442	35910	44366	40710	23800	4600	4136	5162	5736	4844	4930	11568	10314	10404	9534	10930	14414	35266	33184	32858	39032	34670	31100	29689.3	11657.3	43226.7	4901.33	11194	34351.7	756026
d__Bacteria	k__unclassified_d__Bacteria	p__Actinomycetota	c__Acidimicrobiia	o__Acidimicrobiales	f__Microthrixaceae	g__Candidatus_Microthrix	12480	10458	9298	28002	23502	27726	27646	29440	24144	28328	28008	27796	27990	21478	18298	16114	9030	14362	18092	17656	25370	33004	15994	13928	33826	33730	35656	22960	37062	34962	35088	31784	31520	36822	39364	31372	10745.3	27176.9	17878.7	20674	33032.7	34325	912290
d__Bacteria	k__unclassified_d__Bacteria	p__Candidatus_Nealsonbacteria	c__unclassified_p__Candidatus_Nealsonbacteria	o__unclassified_p__Candidatus_Nealsonbacteria	f__unclassified_p__Candidatus_Nealsonbacteria	g__unclassified_p__Candidatus_Nealsonbacteria	12778	15984	10714	33604	24728	30666	31356	39322	31522	34066	38458	31102	46652	43256	30966	28656	30426	21342	20876	19720	30598	19150	15858	13304	27632	24020	25566	36068	37536	50330	34888	31000	32850	34278	35100	36698	13158.7	32758.2	33549.7	19917.7	33525.3	34135.7	1061070
d__Bacteria	k__unclassified_d__Bacteria	p__Actinomycetota	c__Actinomycetes	o__Propionibacteriales	f__Propionibacteriaceae	g__Propionibacterium	3222	4058	2634	3826	3478	4498	4312	4610	4974	4798	4808	5368	6388	5278	4092	4684	2858	4086	4374	4100	6072	6982	2808	2160	7132	7080	7268	5934	7360	8910	33192	29394	31336	37838	39398	30802	3304.67	4519.11	4564.33	4416	7280.67	33660	350112
d__Bacteria	k__unclassified_d__Bacteria	p__Pseudomonadota	c__Betaproteobacteria	o__unclassified_c__Betaproteobacteria	f__unclassified_c__Betaproteobacteria	g__Candidatus_Accumulibacter	32436	23980	23830	24020	20206	22188	22740	25642	20214	23806	26280	22950	44926	29820	25828	20688	21974	14654	11780	10294	12558	12916	13032	11686	27112	25324	25880	20618	21374	27814	34868	32792	31742	36280	33094	31194	26748.7	23116.2	26315	12044.3	24687	33328.3	866540
d__Bacteria	k__unclassified_d__Bacteria	p__Actinomycetota	c__Nitriliruptoria	o__Nitriliruptorales	f__Nitriliruptoraceae	g__Nitriliruptor	42678	22436	30612	22732	20012	24452	23960	23710	22874	25494	25516	21756	30310	24438	21652	12608	5644	11738	27542	22180	23738	53536	37266	38096	23702	23050	24596	17716	26422	26812	34626	30822	30490	34792	37242	30802	31908.7	23389.6	17731.7	33726.3	23716.3	33129	956052
d__Bacteria	k__unclassified_d__Bacteria	p__Pseudomonadota	c__Betaproteobacteria	o__Burkholderiales	f__Comamonadaceae	g__Rhodoferax	41342	28936	29270	16482	14822	17058	17608	22326	15800	18236	18872	19680	38516	24702	21710	69268	104066	24380	8658	7878	10648	12290	10580	9298	15716	15684	16108	13572	16556	18260	35488	32080	31666	36150	33852	29472	33182.7	17876	47107	9892	15982.7	33118	897030
d__Bacteria	k__unclassified_d__Bacteria	p__Candidatus_Krumholzibacteriota	c__Candidatus_Krumholzibacteria	o__unclassified_c__Candidatus_Krumholzibacteria	f__unclassified_c__Candidatus_Krumholzibacteria	g__unclassified_c__Candidatus_Krumholzibacteria	49368	37710	38594	44924	39202	46020	51106	54026	48092	61068	65948	51498	46640	48066	39798	45768	68118	41464	36782	32192	38424	27094	42074	33090	74836	68364	67046	105490	80256	113564	34078	32620	31758	32118	31976	33150	41890.7	51320.4	48309	34942.7	84926	32616.7	1792322
d__Bacteria	k__unclassified_d__Bacteria	p__Chloroflexota	c__Anaerolineae	o__Anaerolineales	f__Anaerolineaceae	g__Levilinea	40298	34066	35724	32116	31164	44610	47844	46210	55992	43460	52412	45462	70110	60636	41010	68484	65784	55966	24916	22310	30782	12848	10132	7232	27988	22794	23148	23520	15984	33808	32124	31716	29280	32986	33472	34720	36696	44363.3	60331.7	18036.7	24540.3	32383	1321108
d__Bacteria	k__unclassified_d__Bacteria	p__Ignavibacteriota	c__Ignavibacteria	o__Ignavibacteriales	f__Ignavibacteriaceae	g__Ignavibacterium	28594	16548	28066	23150	21476	21330	20538	15066	24518	24316	30786	18034	56914	50406	47262	132372	320988	71650	7226	6664	6900	6296	8038	5808	37790	21330	23166	176086	50264	157050	33336	34726	35694	31330	25858	31254	24402.7	22134.9	113265	6822	77614.3	32033	1650830
d__Bacteria	k__unclassified_d__Bacteria	p__Pseudomonadota	c__Gammaproteobacteria	o__Chromatiales	f__Sedimenticolaceae	g__Thiolapillus	15972	12592	16720	8040	6662	8124	8720	8662	9822	8290	9384	8714	18870	15878	13544	17066	28048	8470	13214	11338	12394	16866	11370	9866	65344	67466	74704	43154	44870	52098	32926	31336	29430	34868	30926	29736	15094.7	8490.89	16979.3	12508	57939.3	31537	835484
d__Bacteria	k__unclassified_d__Bacteria	p__Actinomycetota	c__Actinomycetes	o__Micrococcales	f__Microbacteriaceae	g__Agromyces	19410	13312	17300	47728	46690	58082	46640	64782	39440	62340	51480	104066	105504	33404	52200	40178	7380	103310	8528	8272	11814	14766	7528	6398	18074	18456	20112	13366	17928	20828	30408	26730	26980	36594	41434	25834	16674	57916.4	56996	9551	18127.3	31330	1267296
d__Bacteria	k__unclassified_d__Bacteria	p__Actinomycetota	c__Actinomycetes	o__Actinomycetales	f__Actinomycetaceae	g__Actinomyces	39172	27888	28122	65848	56596	63254	64160	65832	53636	77158	74386	58816	79688	58462	52986	42152	14426	38846	22306	21176	24818	46308	30310	35856	29716	32036	33936	18184	33694	30032	32254	28176	28920	31454	35324	30228	31727.3	64409.6	47760	30129	29599.7	31059.3	1506156
d__Bacteria	k__unclassified_d__Bacteria	p__Chloroflexota	c__Ardenticatenia	o__Ardenticatenales	f__Ardenticatenaceae	g__Ardenticatena	25456	21236	21022	30744	29498	37424	37374	35138	43086	34178	39132	34136	42814	41906	28530	27548	19972	26984	26016	25086	31756	18418	12528	11858	39116	34670	35122	31696	24110	43292	29848	29808	29384	32484	33086	31286	22571.3	35634.4	31292.3	20943.7	34667.7	30982.7	1095742
d__Bacteria	k__unclassified_d__Bacteria	p__Actinomycetota	c__Acidimicrobiia	o__Acidimicrobiales	f__Iamiaceae	g__Iamia	22592	14652	16658	63228	50972	53990	50652	55036	42164	50754	49834	49226	37770	29714	25922	20944	9450	24306	18608	18194	23936	36434	18490	16326	32340	31992	34452	21508	35986	33868	30728	28656	28692	32076	34880	28796	17967.3	51761.8	24684.3	21998	31691	30638	1173826
d__Bacteria	k__unclassified_d__Bacteria	p__Actinomycetota	c__Actinomycetes	o__Pseudonocardiales	f__Pseudonocardiaceae	g__Amycolatopsis	8798	7194	6586	17910	15124	16804	16610	17986	15546	18164	17452	16032	15426	12952	11014	8750	5120	9470	9544	9192	13102	17532	8892	7520	16798	16738	17994	13562	17778	19876	32408	27568	27772	33624	35084	26870	7526	16847.6	10455.3	10963.7	17124.3	30554.3	588792
d__Bacteria	k__unclassified_d__Bacteria	p__Planctomycetota	c__Planctomycetia	o__Pirellulales	f__Pirellulaceae	g__Pirellula	9520	12394	8382	51898	37730	40106	39728	54986	33758	36340	38660	35162	89194	59830	43574	43828	43440	29452	13456	13556	17776	21692	14890	12774	19862	17242	18622	18478	24664	29434	30480	26996	28286	31432	32906	31576	10098.7	40929.8	51553	15690.7	21383.7	30279.3	1112104
d__Bacteria	k__unclassified_d__Bacteria	p__Pseudomonadota	c__Betaproteobacteria	o__Nitrosomonadales	f__Thiobacillaceae	g__Thiobacillus	44282	32038	41794	12998	11966	12790	13090	14498	12484	14652	15754	13426	52234	35300	37408	76774	45384	73132	8602	7402	9154	8726	10212	8392	21892	21120	22116	15370	16808	20182	31156	30024	28326	33580	29556	27640	39371.3	13517.6	53372	8748	19581.3	30047	910262
d__Bacteria	k__unclassified_d__Bacteria	p__Actinomycetota	c__Actinomycetes	o__Kitasatosporales	f__Streptomycetaceae	g__Kitasatospora	3346	3616	2410	4786	4164	4540	4656	4994	4654	4962	5004	4338	6462	5094	4274	3160	2152	2696	5668	5524	8838	10922	3604	3006	9460	9762	10044	8424	10198	11750	31900	27762	27462	33086	34450	25404	3124	4677.56	3973	6260.33	9939.67	30010.7	352572
d__Bacteria	k__unclassified_d__Bacteria	p__Pseudomonadota	c__Alphaproteobacteria	o__Sphingomonadales	f__Erythrobacteraceae	g__Altererythrobacter	37914	13680	27724	7614	9850	17510	12926	20088	13658	11584	8512	18580	28784	17732	15580	89272	74696	38326	25242	17552	12146	39046	21588	19644	8914	7394	8188	7426	16352	11002	28204	25028	27464	33096	39728	26144	26439.3	13369.1	44065	22536.3	9879.33	29944	838188
d__Bacteria	k__unclassified_d__Bacteria	p__Actinomycetota	c__Actinomycetes	o__Propionibacteriales	f__Actinopolymorphaceae	g__Actinopolymorpha	3180	3098	2330	4080	3574	4152	4354	4310	4556	3958	3916	3718	5394	4802	3852	3118	2018	3260	10090	10664	14410	17314	7172	5112	17570	18958	19452	14656	19020	20794	30314	26300	26370	32598	34846	24662	2869.33	4068.67	3740.67	10793.7	18408.3	29181.7	417972
d__Bacteria	k__unclassified_d__Bacteria	p__Chloroflexota	c__Anaerolineae	o__Aggregatilineales	f__Aggregatilineaceae	g__Aggregatilinea	23982	22278	20996	30660	29878	38632	39844	38260	47386	35580	41662	36712	54524	49530	34362	79498	42480	69944	23980	22804	29210	17780	11306	9414	42672	38570	38170	32752	26982	46298	28454	28470	26172	30842	31088	30024	22418.7	37623.8	55056.3	19082.3	37574	29175	1251196
d__Bacteria	k__unclassified_d__Bacteria	p__Pseudomonadota	c__Gammaproteobacteria	o__Chromatiales	f__Chromatiaceae	g__Thiorhodococcus	6614	5814	5306	4646	3992	4662	5012	5156	5330	4694	5088	4938	6696	5830	4924	4726	5874	2996	11592	10772	11552	10854	7968	6466	42372	40856	41464	23304	24750	28518	29810	28266	26336	32820	29504	27424	5911.33	4835.33	5174.33	9867.33	33544	29026.7	526926
d__Bacteria	k__unclassified_d__Bacteria	p__Actinomycetota	c__Actinomycetes	o__Nakamurellales	f__Nakamurellaceae	g__Nakamurella	2776	3384	2048	4176	3358	4290	4498	4708	4656	4564	4512	4592	5552	4584	3748	2948	2046	2494	6230	6032	10268	12202	4252	3290	10698	11140	11338	8262	11278	12806	30214	26372	25990	32350	33656	24572	2736	4372.67	3562	7045.67	10920.3	28859	349884
d__Bacteria	k__unclassified_d__Bacteria	p__Pseudomonadota	c__Gammaproteobacteria	o__Xanthomonadales	f__Xanthomonadaceae	g__Lysobacter	43028	28440	31040	17864	15188	16950	18836	21580	16140	19656	20780	18906	62664	38998	35170	34550	32906	23198	13614	10526	14192	15618	15018	13838	21616	19582	20396	21744	25468	27846	30112	28540	28704	30170	27112	26412	34169.3	18433.3	37914.3	13801	22775.3	28508.3	886402
d__Bacteria	k__unclassified_d__Bacteria	p__Actinomycetota	c__Actinomycetes	o__Kineosporiales	f__Kineosporiaceae	g__Angustibacter	1082	2506	836	1724	1416	1754	1842	1832	1932	1438	1352	1564	3904	3046	2582	1514	1184	1144	4664	4804	7660	8278	2890	2336	7472	7968	8408	6202	8382	9470	29482	26066	25896	31754	33618	23936	1474.67	1650.44	2229	5105.33	7983.67	28458.7	281938
d__Bacteria	k__unclassified_d__Bacteria	p__Actinomycetota	c__Actinomycetes	o__Micrococcales	f__Ornithinimicrobiaceae	g__Ornithinimicrobium	5574	4660	4022	5632	4662	6232	6002	5974	6204	5972	5926	5978	9516	7556	6302	7998	5216	7670	8686	8794	12828	16220	6794	5444	15698	16654	17344	12518	16672	18770	30038	25572	25676	31092	33714	24346	4752	5842.44	7376.33	9794.33	16276	28406.3	437956
d__Bacteria	k__unclassified_d__Bacteria	p__Chloroflexota	c__Thermoflexia	o__Thermoflexales	f__Thermoflexaceae	g__Thermoflexus	30988	25034	25992	27492	26468	34760	35040	34898	39754	33266	38904	32758	37440	42916	27888	26710	18216	29174	26214	24884	31284	14204	11092	9940	33522	28430	29078	30724	21872	41406	26936	27274	26084	29682	30258	29412	27338	33704.4	30390.7	19603	30838.7	28274.3	1039994
d__Bacteria	k__unclassified_d__Bacteria	p__Chloroflexota	c__Anaerolineae	o__Anaerolineales	f__Anaerolineaceae	g__Brevefilum	32200	26198	27734	26672	26334	36820	38962	38122	45844	33340	40750	35804	56112	49266	34928	78290	108390	52156	22776	21204	26706	12656	10222	7690	63876	43980	44854	119748	66392	175578	27778	26694	25446	28272	29360	29708	28710.7	35849.8	63190.3	16875.7	85738	27876.3	1570862
d__Bacteria	k__unclassified_d__Bacteria	p__Actinomycetota	c__Actinomycetes	o__Mycobacteriales	f__Nocardiaceae	g__Nocardia	7296	6836	5402	21020	17872	19970	19680	21202	16938	20342	20186	19842	15272	12764	10490	8988	5588	10424	9960	9688	13216	16438	9450	8448	17990	17506	18764	14374	18508	20864	29108	25492	25672	30208	32112	24654	6511.33	19672.4	10587.7	11200	18001	27874.3	602564
d__Bacteria	k__unclassified_d__Bacteria	p__Chloroflexota	c__Anaerolineae	o__Anaerolineales	f__Anaerolineaceae	g__Ornatilinea	32618	26858	28300	27592	27770	38032	40716	39656	48366	37172	45240	38856	57288	50976	33976	58888	60870	47304	22290	19886	26842	11772	9380	7042	30006	24688	24706	27254	17260	38556	27440	26644	25362	28292	28558	29500	29258.7	38155.6	51550.3	16202	27078.3	27632.7	1165956
d__Bacteria	k__unclassified_d__Bacteria	p__Planctomycetota	c__Planctomycetia	o__Planctomycetales	f__Planctomycetaceae	g__Fuerstiella	15064	18168	12580	45406	32092	37588	38506	52156	34374	35780	37984	35108	46016	34788	26802	28208	26118	20494	24360	23452	31264	32404	33584	27120	32392	29270	30574	32988	41430	48016	27510	25086	25414	27794	29710	29284	15270.7	38777.1	30404.3	28697.3	35778.3	27466.3	1128884
d__Bacteria	k__unclassified_d__Bacteria	p__Planctomycetota	c__Planctomycetia	o__Pirellulales	f__Pirellulaceae	g__Stieleria	9474	14878	8674	28678	20810	25658	25542	36578	24036	24420	25442	25978	40620	30592	22460	35044	28696	23424	27708	29218	37476	47746	28492	24124	40392	35556	38352	41548	53706	59974	26922	24024	24828	27598	30508	29104	11008.7	26349.1	30139.3	32460.7	44921.3	27164	1078280
d__Bacteria	k__unclassified_d__Bacteria	p__Actinomycetota	c__Actinomycetes	o__Micrococcales	f__Intrasporangiaceae	g__Humibacillus	2526	3706	1834	3978	3468	4820	5156	5160	5922	4862	4768	5908	6238	5166	3738	6578	3016	11328	5562	5874	8884	10160	4264	3052	11632	12990	13144	8682	11860	13570	28472	24564	24996	29672	31920	22740	2688.67	4893.56	6010.67	6299.33	11979.7	27060.7	360210
d__Bacteria	k__unclassified_d__Bacteria	p__Pseudomonadota	c__Alphaproteobacteria	o__Rhodobacterales	f__Roseobacteraceae	g__Roseovarius	29476	19994	22482	21862	18208	22062	20958	26018	19498	20054	20388	22258	33116	20134	17898	48042	51894	28710	25038	19980	20220	38572	30628	29112	23196	21694	23756	15946	28618	26578	28224	23184	25868	26780	30094	26052	23984	21256.2	33299	27258.3	23298	26700.3	926592
d__Bacteria	k__unclassified_d__Bacteria	p__Thermodesulfobacteriota	c__Desulfobacteria	o__Desulfobacterales	f__Desulfobacteriaceae	g__Desulfobacterium	32028	23492	33722	22314	23638	38776	45646	43438	56384	31718	43452	33554	27292	24374	19714	17020	24118	25088	47788	37980	36744	13564	25968	14074	75288	67360	65614	170740	77224	168556	25824	26168	24298	27758	26674	28600	29747.3	37657.8	22934.3	29353	104130	26553.7	1525990
d__Bacteria	k__unclassified_d__Bacteria	p__Acidobacteriota	c__Vicinamibacteria	o__Vicinamibacterales	f__Vicinamibacteraceae	g__Luteitalea	192230	108442	137926	230928	183708	198492	233848	315312	153854	352394	348692	278146	116880	92552	64456	44066	27340	85978	23714	19058	26740	15542	38474	33032	43770	41692	41726	52806	43116	67576	27332	26790	25710	26584	26436	25880	146199	255042	71878.7	26093.3	48447.7	26455.3	3771222
d__Bacteria	k__unclassified_d__Bacteria	p__Pseudomonadota	c__Gammaproteobacteria	o__Pseudomonadales	f__Marinobacteraceae	g__Marinobacter	23632	17712	17856	28016	25936	31500	31126	35132	29154	28854	30326	30000	32286	25642	21094	24098	24162	55214	21934	18286	22352	26202	29014	28940	43024	41222	43376	32410	38410	43444	27642	26604	27080	25678	24510	26508	19733.3	30004.9	30416	24454.7	40314.3	26337	1058376
d__Bacteria	k__unclassified_d__Bacteria	p__Actinomycetota	c__Actinomycetes	o__Micrococcales	f__Intrasporangiaceae	g__Ornithinibacter	3142	5394	2802	8120	7406	9726	9740	10572	12840	9730	9748	14386	12882	8766	7414	21546	11114	18842	3450	3864	5392	7838	3576	2472	25000	28576	30878	17698	22606	29278	24904	21642	21216	29648	39488	20812	3779.33	10252	13427.3	4432	25672.7	26285	522508
d__Bacteria	k__unclassified_d__Bacteria	p__Cyanobacteriota	c__Cyanophyceae	o__Synechococcales	f__Synechococcaceae	g__Synechococcus	5730	4564	4624	6230	5464	6504	6666	7534	6698	6868	7016	6798	14216	10772	8358	18122	13046	7936	70274	73650	70472	61016	75410	47528	27796	18078	18624	25462	47850	37122	24514	25282	22952	29292	32124	22768	4972.67	6642	12075	66391.7	29155.3	26155.3	877360
d__Bacteria	k__unclassified_d__Bacteria	p__Actinomycetota	c__Actinomycetes	o__Geodermatophilales	f__Geodermatophilaceae	g__Modestobacter	4610	4254	3370	6788	5760	7016	7386	7508	7046	7038	6918	7176	7396	6066	4884	3712	2288	3828	6974	6444	9920	12812	5272	4516	12206	12318	13164	8842	12590	14258	27944	23872	23778	28472	30190	22668	4078	6959.56	4695.67	7656.33	12229.7	26154	379284
d__Bacteria	k__unclassified_d__Bacteria	p__Chloroflexota	c__Chloroflexia	o__Chloroflexales	f__Oscillochloridaceae	g__Oscillochloris	16978	15526	14452	24534	22764	28696	29356	27140	33792	27394	30462	26918	38434	34714	24734	27010	21704	23258	17920	17006	21908	16620	10590	9994	33540	30134	29030	26554	23268	35848	25468	24752	24472	26952	27792	26630	15652	27895.1	28309	15673	29729	26011	896344
d__Bacteria	k__unclassified_d__Bacteria	p__Planctomycetota	c__Planctomycetia	o__Pirellulales	f__Pirellulaceae	g__Novipirellula	8532	11170	7660	20064	14316	18612	18284	24594	18664	17324	19568	18458	32394	26358	19854	24804	22096	16852	24842	25440	33150	35448	21480	18200	36894	33140	35304	39202	47234	53884	25874	23638	24242	26394	28180	27424	9120.67	18876	23726.3	26426.7	40943	25958.7	899574
d__Bacteria	k__unclassified_d__Bacteria	p__Actinomycetota	c__Actinomycetes	o__Kitasatosporales	f__Streptomycetaceae	g__Yinghuangia	2382	3078	1618	5944	5120	5886	5846	6442	5136	5702	6150	6114	5250	4380	3726	2602	1276	2952	4506	4678	7612	8732	3136	2470	8634	8618	8840	6658	8618	9686	26822	23610	23886	29062	30234	21846	2359.33	5815.56	3364.33	5189	8509	25910	317252
d__Bacteria	k__unclassified_d__Bacteria	p__Bacillota	c__Clostridia	o__Eubacteriales	f__Peptostreptococcaceae	g__Romboutsia	1550	2278	1368	578	470	698	804	914	816	558	706	676	854	572	350	346	712	426	400	422	552	340	292	264	6006	3430	5184	6116	2440	8180	25346	20946	20350	22016	23274	41990	1732	691.111	543.333	378.333	5226	25653.7	202224
d__Bacteria	k__unclassified_d__Bacteria	p__Bacillota	c__Clostridia	o__Eubacteriales	f__Clostridiaceae	g__Clostridium	12782	14560	10516	9040	7908	10730	11616	11340	13010	11022	12910	11616	13276	11096	8514	13886	20050	10916	7146	6424	7590	6014	5660	4878	12782	12752	11118	28848	14004	23326	22024	21882	20112	28478	28688	32300	12619.3	11021.3	12956.3	6285.33	17138.3	25580.7	508814
d__Bacteria	k__unclassified_d__Bacteria	p__Actinomycetota	c__Actinomycetes	o__Jiangellales	f__Jiangellaceae	g__Haloactinopolyspora	1368	1616	1054	1978	1606	2208	2122	1994	2722	1550	1486	1448	4402	3942	4242	2046	1800	1818	14092	15364	19314	23424	10116	7436	23904	25466	26944	19884	27326	28184	26420	22928	22512	28410	30450	22626	1346	1901.56	3041.67	14957.7	25284.7	25557.7	434202
d__Bacteria	k__unclassified_d__Bacteria	p__Pseudomonadota	c__Gammaproteobacteria	o__Chromatiales	f__Chromatiaceae	g__Thiococcus	4564	3744	3346	1796	1452	1942	2006	2018	2162	1854	1940	1916	5024	4252	3592	3542	4048	2056	5862	5632	6136	5288	4158	3714	23804	23238	23110	13026	13586	14844	26342	24614	23426	28952	25626	23868	3884.67	1898.44	3752.33	5131.67	18601.3	25471.3	346480
d__Bacteria	k__unclassified_d__Bacteria	p__Actinomycetota	c__Actinomycetes	o__Jatrophihabitantales	f__Jatrophihabitantaceae	g__Jatrophihabitans	2610	2764	1798	4632	4182	4834	5108	5390	4910	5002	4776	4934	5316	4224	3688	2614	1790	2432	4824	4482	7856	8970	3336	2680	8090	8206	8686	5948	7980	9364	27000	22530	23244	27534	29558	21554	2390.67	4863.11	3344	5358	8045.67	25236.7	302846
d__Bacteria	k__unclassified_d__Bacteria	p__Actinomycetota	c__Actinomycetes	o__Micromonosporales	f__Micromonosporaceae	g__Dactylosporangium	5314	4778	3940	8944	7670	9028	8824	8868	8344	9588	9888	8978	8120	7156	5132	4400	2752	4262	7512	7536	11036	13742	5584	4898	12742	12868	13746	10184	13832	15360	26400	22950	23164	27150	28768	21752	4677.33	8903.56	5303.67	8384.67	13122	25030.7	405210
d__Bacteria	k__unclassified_d__Bacteria	p__Candidatus_Saccharibacteria	c__unclassified_p__Candidatus_Saccharibacteria	o__unclassified_p__Candidatus_Saccharibacteria	f__unclassified_p__Candidatus_Saccharibacteria	g__unclassified_p__Candidatus_Saccharibacteria	14344	10286	13604	14164	13132	17908	18248	18820	19948	14410	17024	15612	14070	11354	9426	10076	12852	11350	35516	26388	28532	15024	15928	11598	23014	21142	21804	19930	17638	28762	27012	24030	24426	24104	26688	23650	12744.7	16585.1	11521.3	22164.3	22048.3	24985	671814
d__Bacteria	k__unclassified_d__Bacteria	p__Actinomycetota	c__Actinomycetes	o__Streptosporangiales	f__Nocardiopsaceae	g__Nocardiopsis	6722	5550	5198	6104	5072	6216	6130	6740	5970	6220	6254	5842	10550	8128	7230	7718	4766	6212	7806	7414	11014	14218	6574	5828	12294	12262	13062	9370	13878	14538	25380	23218	22816	26998	28560	21750	5823.33	6060.89	7434	8809	12567.3	24787	393602
d__Bacteria	k__unclassified_d__Bacteria	p__Pseudomonadota	c__Betaproteobacteria	o__Burkholderiales	f__Burkholderiaceae	g__Zeimonas	44430	26290	30432	4888	4198	4458	4788	5084	4052	5058	5622	5358	53160	30864	25746	86114	64692	59762	1750	1350	1634	1976	2276	2178	3008	2606	2904	2350	2722	3470	26790	27038	25262	26486	21458	21538	33717.3	4834	53389.7	1860.67	2843.33	24762	641792
d__Bacteria	k__unclassified_d__Bacteria	p__Actinomycetota	c__Actinomycetes	o__Micrococcales	f__Intrasporangiaceae	g__Knoellia	3650	3404	2860	4456	3800	5040	5006	5122	5710	4742	4728	5792	7014	5248	4302	7650	4014	9124	5134	5432	8106	9454	4302	3480	13778	15048	16288	9928	13410	15668	25648	22176	21984	27576	30350	20234	3304.67	4932.89	6225.33	5984.67	14020	24661.3	359658
d__Bacteria	k__unclassified_d__Bacteria	p__Pseudomonadota	c__Gammaproteobacteria	o__unclassified_c__Gammaproteobacteria	f__unclassified_c__Gammaproteobacteria	g__Acidibacter	32704	22578	22606	3136	2854	3822	4766	6392	4050	4214	4514	4672	58244	33660	28400	39402	33586	19794	2098	1820	2016	3754	2988	3072	6452	5194	5564	5706	6492	8286	24972	23530	23412	28110	25394	22480	25962.7	4268.89	35514.3	2624.67	6282.33	24649.7	530734
d__Bacteria	k__unclassified_d__Bacteria	p__Bacteroidota	c__Bacteroidia	o__Marinilabiliales	f__Prolixibacteraceae	g__Draconibacterium	9628	24046	9396	5954	6548	10010	8542	5434	21954	4812	6468	5470	54624	47876	64810	48960	99808	46196	7064	5920	7114	39186	8056	8246	50366	56934	57378	116480	84308	96866	28704	29682	28856	22288	18798	19136	14356.7	8354.67	60379	12597.7	77055.3	24577.3	1165918
d__Bacteria	k__unclassified_d__Bacteria	p__Pseudomonadota	c__Betaproteobacteria	o__Burkholderiales	f__Burkholderiaceae	g__Lautropia	46638	26242	30966	5834	5208	5464	5888	6548	4730	7010	7486	6484	29034	16686	14038	14076	13314	7926	1468	1210	1696	1780	2496	2228	2416	2162	2350	2226	2554	3152	26726	26942	24690	26620	20712	21174	34615.3	6072.44	15845.7	1813	2476.67	24477.3	426174
d__Bacteria	k__unclassified_d__Bacteria	p__Planctomycetota	c__Planctomycetia	o__Pirellulales	f__Pirellulaceae	g__Aureliella	3070	5130	2730	7232	4934	6712	6718	12140	6444	5098	5718	6200	49430	27266	23052	51996	56366	20896	13980	13538	14442	40848	8546	8822	11804	10982	12478	8732	20074	17362	24308	20332	22892	24472	29604	25166	3643.33	6799.56	38167.7	16696	13572	24462.3	629514
d__Archaea	k__unclassified_d__Archaea	p__Candidatus_Thermoplasmatota	c__Thermoplasmata	o__unclassified_c__Thermoplasmata	f__unclassified_c__Thermoplasmata	g__unclassified_c__Thermoplasmata	37384	28620	33036	33330	31796	42784	47206	47084	51642	44424	51178	44296	33566	33530	23888	24524	24736	27940	34284	29270	33956	17574	20932	14946	54056	45406	45682	168930	61036	141260	24232	24230	22642	24866	25194	25130	33013.3	43748.9	28030.7	25160.3	86061.7	24382.3	1474590
d__Bacteria	k__unclassified_d__Bacteria	p__Actinomycetota	c__Actinomycetes	o__Propionibacteriales	f__Propionibacteriaceae	g__Tessaracoccus	2470	2782	1948	7492	8098	12680	10314	8278	17974	15838	12780	23168	7246	4902	4696	4056	2340	7764	5076	5302	7984	9558	4024	3074	10226	10654	10682	8338	10786	12342	24736	21788	21916	26268	28226	20682	2400	12958	5167.33	5836.33	10504.7	23936	396488
d__Bacteria	k__unclassified_d__Bacteria	p__Actinomycetota	c__Acidimicrobiia	o__Acidimicrobiales	f__Iamiaceae	g__Actinomarinicola	30198	17532	21284	107386	86092	95774	85808	96306	71740	67156	62620	69844	42268	32848	29762	21092	8052	25672	15254	14656	17908	35632	18420	17606	23850	23858	25876	15240	25806	24268	24790	22164	22180	24518	26822	23102	23004.7	82525.1	26615.7	19912.7	23149.7	23929.3	1373384
d__Bacteria	k__unclassified_d__Bacteria	p__Candidatus_Cloacimonadota	c__unclassified_p__Candidatus_Cloacimonadota	o__unclassified_p__Candidatus_Cloacimonadota	f__unclassified_p__Candidatus_Cloacimonadota	g__unclassified_p__Candidatus_Cloacimonadota	34570	20834	27054	27544	24436	29100	30350	30114	29642	34046	36226	28048	25172	27804	22222	30410	42286	27134	26924	24776	28128	20834	31738	20224	64066	54380	53040	121420	90356	116430	24848	23262	23952	23124	23160	24954	27486	29945.1	29171.3	25437.3	83282	23883.3	1322608
d__Bacteria	k__unclassified_d__Bacteria	p__Pseudomonadota	c__Alphaproteobacteria	o__Hyphomicrobiales	f__Kaistiaceae	g__Bauldia	18944	16460	16384	191260	157772	174194	186726	228978	134952	197048	195236	173506	62536	51500	32764	23900	12752	49374	14478	11508	15094	13810	19062	15936	22846	21558	22822	17760	22598	27380	24204	22230	21894	24530	26330	23680	17262.7	182186	38804.3	14981.3	22494	23811.3	2292006
d__Bacteria	k__unclassified_d__Bacteria	p__Actinomycetota	c__Actinomycetes	o__Mycobacteriales	f__Gordoniaceae	g__Gordonia	4190	4104	3416	9750	8368	9906	9644	10926	8906	9948	9246	10148	9384	6914	5870	5444	3452	4954	7760	7680	11470	12818	6260	4834	15174	16350	16640	11164	15958	16924	24596	21906	21816	26090	27608	20466	3903.33	9649.11	6003	8470.33	15368.3	23747	420084
d__Bacteria	k__unclassified_d__Bacteria	p__Actinomycetota	c__Actinomycetes	o__Sporichthyales	f__Sporichthyaceae	g__Sporichthya	1782	2388	1266	1932	1668	1912	1978	2018	2068	2008	1870	1916	3498	3070	2336	1340	1070	1012	4776	4914	7606	8660	3210	2208	8890	9448	10030	7106	9350	10436	25286	21652	21548	25894	27692	20258	1812	1930	2054.33	5229	9210	23721.7	264096
d__Bacteria	k__unclassified_d__Bacteria	p__Actinomycetota	c__Acidimicrobiia	o__Acidimicrobiales	f__Ilumatobacteraceae	g__Desertimonas	15778	14298	11342	34058	29524	35120	32246	34814	30946	32490	31908	32500	41100	27948	24784	23436	13386	18610	17028	16424	21188	30000	18676	14280	37056	38098	41288	27580	44666	40758	24546	21648	21828	24748	27196	22052	13806	32622.9	24877.3	19599.3	38241	23669.7	973348
d__Bacteria	k__unclassified_d__Bacteria	p__Chloroflexota	c__Chloroflexia	o__Chloroflexales	f__Roseiflexaceae	g__Roseiflexus	15594	13236	13408	19830	17790	23136	23312	22094	26894	22642	25756	22440	32624	29300	21330	22722	19522	20572	14540	14328	17344	13644	9048	8446	25114	22602	23028	20286	18338	27866	23218	22246	22032	24786	25040	23262	14079.3	22654.9	24345	12891.7	22872.3	23430.7	747370
d__Bacteria	k__unclassified_d__Bacteria	p__Pseudomonadota	c__Gammaproteobacteria	o__unclassified_c__Gammaproteobacteria	f__Candidatus_Competibacteraceae	g__Candidatus_Contendobacter	16030	12112	12560	11670	9940	11210	11894	12974	11514	12088	13006	11892	19232	14256	12170	14208	25710	8736	25384	22434	29286	40962	35916	32454	41876	38896	37710	33582	31598	45986	24670	22846	22592	25234	22908	22110	13567.3	11798.7	15718.7	31072.7	38274.7	23393.3	797646
d__Bacteria	k__unclassified_d__Bacteria	p__Candidatus_Tectomicrobia	c__unclassified_p__Candidatus_Tectomicrobia	o__unclassified_p__Candidatus_Tectomicrobia	f__unclassified_p__Candidatus_Tectomicrobia	g__unclassified_p__Candidatus_Tectomicrobia	36502	27458	30176	71052	64556	69440	74258	84292	63360	88276	91464	73072	41708	37184	27712	24836	19162	32334	29410	24018	29914	20998	28964	27490	33888	31450	31604	37252	29244	44482	23340	22532	22210	23112	24334	23850	31378.7	75530	30489.3	26799	34653.3	23229.7	1464934
d__Bacteria	k__unclassified_d__Bacteria	p__Bacteroidota	c__Cytophagia	o__Cytophagales	f__Cyclobacteriaceae	g__Algoriphagus	14162	7932	11514	7580	8318	13168	11854	18250	9224	8062	8066	10618	16574	10784	10114	12194	20152	9902	8094	7384	7674	10948	7530	5896	13500	12230	12834	14838	18376	18956	26342	22016	21490	26098	23254	18614	11202.7	10571.1	13286.7	7921	15122.3	22969	484542
d__Bacteria	k__unclassified_d__Bacteria	p__Pseudomonadota	c__Gammaproteobacteria	o__Cellvibrionales	f__Microbulbiferaceae	g__Microbulbifer	22500	17092	16506	54918	48428	62712	54938	70616	40726	38530	38490	45074	34322	24060	20568	21736	18330	31102	28236	21998	31690	32636	29398	27888	53872	52560	54576	43252	51242	57922	24306	23188	24132	21136	20404	23398	18699.3	50492.4	25019.7	28641	52237.3	22760.7	1282482
d__Bacteria	k__unclassified_d__Bacteria	p__Verrucomicrobiota	c__Verrucomicrobiae	o__Limisphaerales	f__unclassified_o__Limisphaerales	g__Pedosphaera	27968	29198	21168	53874	43032	50400	53824	62938	59094	59702	67842	58374	100764	70474	53084	48030	47458	32642	12556	11414	15620	13118	16824	13978	20810	18486	19112	24094	23732	29672	23276	21624	21910	23216	22720	23156	26111.3	56564.4	58742	13918.3	22651	22650.3	1295184
d__Bacteria	k__unclassified_d__Bacteria	p__Chloroflexota	c__Anaerolineae	o__Anaerolineales	f__Anaerolineaceae	g__Leptolinea	29224	23646	25074	25674	25518	35854	37344	37078	44122	33890	41106	35922	46040	41542	28426	47814	47328	40306	19348	17414	23826	8810	8238	6226	23400	19296	19356	21328	13840	31460	22454	22222	21004	22874	23552	23780	25981.3	35167.6	41909.3	13977	21446.7	22647.7	994336
d__Bacteria	k__unclassified_d__Bacteria	p__Actinomycetota	c__Actinomycetes	o__Propionibacteriales	f__Propionibacteriaceae	g__Microlunatus	2674	3222	1982	3882	3130	4194	4230	3966	4118	3936	4058	4184	5214	4228	3518	3686	2356	3164	5106	5228	7854	9702	4394	3028	9770	10536	11144	7708	10604	12012	23644	20310	20474	25022	26250	19430	2626	3966.44	3694.33	5885.33	10295.7	22521.7	297958
d__Archaea	k__unclassified_d__Archaea	p__Euryarchaeota	c__Methanobacteria	o__Methanobacteriales	f__Methanobacteriaceae	g__Methanobacterium	4276	3072	3760	2638	2296	3128	3332	3282	3798	3308	3842	3248	3164	2586	1896	2176	1976	2196	2834	2516	3118	2308	1424	1082	4276	3884	3938	4582	3462	6218	20282	18800	17248	29372	23204	22868	3702.67	3208	2332.33	2213.67	4393.33	21962.3	225390
d__Bacteria	k__unclassified_d__Bacteria	p__Chloroflexota	c__Candidatus_Thermofonsia	o__unclassified_c__Candidatus_Thermofonsia	f__unclassified_c__Candidatus_Thermofonsia	g__Candidatus_Roseilinea	18932	16030	15556	20786	19350	24836	25108	23934	29734	23082	26716	23750	33294	30222	21296	22466	16744	20618	17178	16182	20896	13436	8502	7778	29268	26266	26660	22990	20102	32520	21222	21012	20332	23104	23296	22514	16839.3	24144	24106.7	13995.3	26301	21913.3	785712
d__Bacteria	k__unclassified_d__Bacteria	p__Candidatus_Sumerlaeota	c__unclassified_p__Candidatus_Sumerlaeota	o__unclassified_p__Candidatus_Sumerlaeota	f__unclassified_p__Candidatus_Sumerlaeota	g__unclassified_p__Candidatus_Sumerlaeota	19734	16980	16090	26868	22186	27200	29914	32630	30426	34772	38118	30898	31160	28564	22870	22992	24132	20686	18202	16456	22320	13726	14836	11934	29798	25054	25622	45454	33096	51082	22340	20672	20596	22822	22344	22474	17601.3	30334.7	25067.3	16245.7	35017.7	21874.7	915048
d__Bacteria	k__unclassified_d__Bacteria	p__Thermodesulfobacteriota	c__Desulfobacteria	o__Desulfobacterales	f__Desulfococcaceae	g__Desulfococcus	10594	8084	10684	8646	8548	13062	14770	13424	20276	10472	13680	11142	18156	17310	14278	10458	18850	10236	19376	15660	14300	6406	10828	7048	47284	38160	38390	113354	50580	105222	21532	21296	19572	23132	22280	23010	9787.33	12668.9	14881.3	12269.7	65498.3	21803.7	830100
d__Bacteria	k__unclassified_d__Bacteria	p__Pseudomonadota	c__Alphaproteobacteria	o__Rhodobacterales	f__Paracoccaceae	g__Rhodobacter	28212	16406	19694	11324	9928	11570	11320	14446	11162	11682	11112	12748	31340	18664	15832	17684	17848	12996	13364	9518	10020	24686	16582	17640	9764	9596	10448	6880	11940	12122	22240	17792	19514	24738	26644	19634	21437.3	11699.1	19060.7	15301.7	10125	21760.3	567090
d__Bacteria	k__unclassified_d__Bacteria	p__Thermodesulfobacteriota	c__Desulfobacteria	o__Desulfobacterales	f__Desulfobacteraceae	g__Desulfobacula	19730	15792	19710	22848	21990	32698	37394	33736	49084	26112	34782	29534	21334	20666	17424	13114	18132	17042	46692	36766	36814	15622	24720	16968	70724	63116	63438	114776	68432	132746	21870	22166	20290	22064	21062	23082	18410.7	32019.8	17952	29597	85538.7	21755.7	1272470
d__Bacteria	k__unclassified_d__Bacteria	p__Pseudomonadota	c__Alphaproteobacteria	o__Rhodobacterales	f__Paracoccaceae	g__Thermohalobaculum	16686	9708	12266	14800	11454	13042	13138	17722	12648	16250	16044	18558	20670	15622	13668	24546	30514	18776	9932	6928	9886	8994	17234	18060	5404	4560	5198	3820	6632	5904	25016	24512	23722	17722	16460	23002	12886.7	14850.7	20632.7	11839	5253	21739	529098
d__Bacteria	k__unclassified_d__Bacteria	p__Bacillota	c__Bacilli	o__Bacillales	f__Bacillaceae	g__Bacillus	13274	9168	10784	12074	10766	13300	13482	13788	14082	13648	15450	12890	14354	11422	8416	9764	9570	9432	7872	6754	8784	7826	6864	5908	12446	11342	11472	15268	12360	17738	13478	11092	11748	13934	67420	12542	11075.3	13275.6	10493	7334.67	13437.7	21702.3	470512
d__Bacteria	k__unclassified_d__Bacteria	p__Pseudomonadota	c__Betaproteobacteria	o__Nitrosomonadales	f__Nitrosomonadaceae	g__Nitrosomonas	21308	16706	17224	25284	22022	25226	26000	27684	26022	23342	26524	23130	38988	37596	33842	107078	186032	39316	15100	12336	15476	14500	17144	13780	29210	28264	28676	20806	23644	28760	22222	21956	21360	21656	20742	21148	18412.7	25026	73808.7	14722.7	26560	21514	1100104
d__Bacteria	k__unclassified_d__Bacteria	p__Pseudomonadota	c__Gammaproteobacteria	o__Chromatiales	f__Ectothiorhodospiraceae	g__Thioalbus	17698	12834	13396	8288	7282	8284	9202	9460	8848	9182	10176	8900	14076	11358	10274	11824	12718	10838	10106	8336	9980	11166	11656	10844	24022	24050	25138	17206	18828	21276	22500	21496	20626	23112	20636	20706	14642.7	8846.89	11848	10348	21753.3	21512.7	516322
d__Bacteria	k__unclassified_d__Bacteria	p__Actinomycetota	c__Actinomycetes	o__Micrococcales	f__Intrasporangiaceae	g__Intrasporangium	4672	4406	3908	4940	4146	6120	7462	7888	8584	7882	8102	10510	6488	7436	4530	14738	3904	40250	3598	3736	5506	7074	2930	2188	8956	9456	10526	6624	8572	10092	21790	19204	19060	23170	25932	18038	4328.67	7292.67	12891	4172	9037.67	21199	362418
d__Bacteria	k__unclassified_d__Bacteria	p__Actinomycetota	c__Thermoleophilia	o__Solirubrobacterales	f__Solirubrobacteraceae	g__Solirubrobacter	9824	9038	7918	33360	29960	22522	19328	21694	16236	26338	24304	20510	13884	10962	8854	8456	5862	8440	9028	8652	11906	13322	8178	7774	16454	15292	16046	13282	15596	20654	21872	20070	19362	22326	23794	19546	8926.67	23805.8	9409.67	9810	16220.7	21161.7	580644
d__Bacteria	k__unclassified_d__Bacteria	p__Actinomycetota	c__Actinomycetes	o__Kineosporiales	f__Kineosporiaceae	g__Kineococcus	1228	2142	852	2510	1988	2578	2452	2628	2434	1776	1914	1866	3264	2672	2362	1376	1016	1110	5200	5216	8090	9290	3412	2560	7606	7968	8844	6436	8316	9862	22174	19278	19232	22564	24016	18094	1407.33	2238.44	1966.67	5628	8172	20893	244326
d__Bacteria	k__unclassified_d__Bacteria	p__Pseudomonadota	c__Alphaproteobacteria	o__Hyphomicrobiales	f__Rhodovibrionaceae	g__Pelagibius	23762	18350	19480	126686	106210	102020	92854	108238	71204	80768	78282	71254	50864	40806	26914	20584	10626	27756	42082	27712	40404	28224	121252	97940	21878	21366	21500	17052	23556	25690	21422	19428	19944	20328	21964	21658	20530.7	93057.3	29591.7	59602.3	21840.3	20790.7	1690058
d__Bacteria	k__unclassified_d__Bacteria	p__Acidobacteriota	c__Blastocatellia	o__Blastocatellales	f__Blastocatellaceae	g__Aridibacter	132628	31516	92942	6230	4710	5834	6026	10640	6556	8020	8738	8554	16216	11226	12160	13730	5036	8644	1614	1240	1968	1520	8932	2784	3158	2760	2658	3502	3926	4280	19312	18486	19558	21358	24330	21524	85695.3	7256.44	11168.7	3009.67	3380.67	20761.3	552316
d__Archaea	k__unclassified_d__Archaea	p__Euryarchaeota	c__Methanomicrobia	o__Methanotrichales	f__Methanotrichaceae	g__Methanothrix	15574	13708	13656	12030	11042	14746	15876	15486	17942	15330	18668	15156	24522	24870	18460	55270	55618	35920	9208	7990	9506	5522	5658	4496	12698	10956	11370	14630	10994	17920	19836	18560	18552	24600	22398	20200	14312.7	15141.8	35776.7	7063.33	13094.7	20691	638968
d__Bacteria	k__unclassified_d__Bacteria	p__Pseudomonadota	c__Alphaproteobacteria	o__Rhodobacterales	f__Paracoccaceae	g__Silicimonas	144962	67260	98230	12364	11126	15946	16624	23022	14376	11726	11932	16230	70198	28218	30456	25548	18862	20252	74646	46376	32622	229986	65154	75372	23698	21922	24626	19814	43132	34850	22502	17622	19898	21220	22812	19742	103484	14816.2	32255.7	87359.3	28007	20632.7	1453326
d__Bacteria	k__unclassified_d__Bacteria	p__Chloroflexota	c__Ktedonobacteria	o__Ktedonobacterales	f__Ktedonobacteraceae	g__Ktedonobacter	17154	16146	14240	30778	28846	35780	36558	34412	39556	34128	38044	33772	34956	31208	21300	23248	16704	23220	15324	14104	19404	12310	9032	8318	29036	26398	26090	21530	18840	30104	20132	19504	19368	21498	21196	21148	15846.7	34652.7	25106	13082	25333	20474.3	863386
d__Bacteria	k__unclassified_d__Bacteria	p__Bacillota	c__Bacilli	o__Bacillales	f__Paenibacillaceae	g__Paenibacillus	17360	14876	14378	23348	20930	25152	26304	26722	28950	26732	30942	27612	28804	24638	19160	23886	23938	20158	14940	13562	17640	15384	11982	10182	28528	24860	25542	37756	25660	39780	20600	19502	18942	20826	22276	20662	15538	26299.1	23430.7	13948.3	30354.3	20468	812514
d__Bacteria	k__unclassified_d__Bacteria	p__Actinomycetota	c__Nitriliruptoria	o__Euzebyales	f__Euzebyaceae	g__Euzebya	29444	15424	21150	18808	16238	19592	19150	19638	17998	20096	19592	17930	22834	18366	15788	10530	4396	9522	16046	14556	15758	40178	22938	22898	17706	18070	19306	13352	19736	19440	21314	18694	18820	21080	22914	19320	22006	18782.4	13572.7	22062.3	17935	20357	678622
d__Bacteria	k__unclassified_d__Bacteria	p__Pseudomonadota	c__Gammaproteobacteria	o__Oceanospirillales	f__Halomonadaceae	g__Halomonas	16530	14342	12540	23048	20242	23038	23080	25660	20034	20874	22156	20318	21780	18264	15410	16314	18736	14074	19238	16188	19586	25050	24128	23306	30362	29412	30310	24906	32364	33302	21694	20358	20860	19464	19502	19866	14470.7	22050	17429.7	21249.3	30109.3	20290.7	776336
d__Archaea	k__unclassified_d__Archaea	p__Euryarchaeota	c__unclassified_p__Euryarchaeota	o__unclassified_p__Euryarchaeota	f__unclassified_p__Euryarchaeota	g__unclassified_p__Euryarchaeota	29860	22380	24594	33426	30212	37106	38228	40472	37280	43410	46086	37622	34192	30606	22970	25622	25264	25090	19440	17200	21236	17240	17512	14370	28476	26318	26062	37208	31452	41992	20348	19896	18984	21132	20988	20380	25611.3	38204.7	27290.7	17833	31918	20288	1004654
d__Bacteria	k__unclassified_d__Bacteria	p__Verrucomicrobiota	c__Verrucomicrobiae	o__Verrucomicrobiales	f__Verrucomicrobiaceae	g__Haloferula	14784	22490	8788	9178	7406	13338	16970	30898	14420	16796	13884	29786	44160	14594	16652	5448	4450	5158	2730	2292	3180	4224	3942	3088	9554	9488	10606	7144	14444	12990	21926	17540	20150	20068	22010	19906	15354	16964	15077	3242.67	10704.3	20266.7	494482
d__Bacteria	k__unclassified_d__Bacteria	p__Actinomycetota	c__Actinomycetes	o__Micrococcales	f__Promicromonosporaceae	g__Isoptericola	1606	1914	1392	3980	3730	5112	4364	4182	4704	3612	3450	4330	5320	4220	4966	12602	4474	62008	6156	6324	9128	11118	4960	3808	11942	12602	13356	8968	11980	13372	20450	17724	18094	21154	23610	16988	1637.33	4162.67	15598.3	6915.67	12036.7	19670	367700
d__Bacteria	k__unclassified_d__Bacteria	p__Planctomycetota	c__Planctomycetia	o__Pirellulales	f__Pirellulaceae	g__Lignipirellula	5126	6702	4374	26842	18574	21314	21610	29730	18768	19354	20822	17902	39362	28140	20144	17112	17340	11590	9768	9812	13412	12896	14158	14050	13778	12222	12816	14888	18986	22310	19614	17684	18548	20406	20570	20858	5400.67	21657.3	22281.3	12349.3	15833.3	19613.3	631582
d__Bacteria	k__unclassified_d__Bacteria	p__Candidatus_Dormibacteraeota	c__unclassified_p__Candidatus_Dormibacteraeota	o__unclassified_p__Candidatus_Dormibacteraeota	f__unclassified_p__Candidatus_Dormibacteraeota	g__unclassified_p__Candidatus_Dormibacteraeota	25014	17140	18308	29118	24674	27622	28416	30628	25404	36516	36960	32430	25906	20532	15564	12742	6710	12698	10204	9400	11280	17706	11206	10526	18002	17622	18896	14566	18062	21520	20258	18262	18428	20440	21560	18482	20154	30196.4	15692	11720.3	18111.3	19571.7	722802
d__Bacteria	k__unclassified_d__Bacteria	p__Pseudomonadota	c__Alphaproteobacteria	o__Rhodobacterales	f__Paracoccaceae	g__Rhodovulum	16770	12400	12156	12182	9846	12290	12306	15782	11350	12718	12928	16350	24996	15590	13526	15120	14450	10436	15592	11884	11682	26120	16520	14932	15450	15882	17104	10692	17480	17518	20146	16500	17826	21184	22970	18262	13775.3	12861.3	15686.3	16121.7	15687.7	19481.3	558940
d__Bacteria	k__unclassified_d__Bacteria	p__Pseudomonadota	c__Gammaproteobacteria	o__Cellvibrionales	f__Halieaceae	g__Seongchinamella	12288	9870	9238	9198	8062	10792	10976	12216	12032	9042	10432	9180	11410	9372	8320	7768	9318	5252	22444	19672	22004	36574	17268	16730	54528	60694	61720	40308	53226	51420	21906	20776	21202	16908	16588	19260	10465.3	10214.4	8573.33	22448.7	53649.3	19440	747994
d__Bacteria	k__unclassified_d__Bacteria	p__Actinomycetota	c__Actinomycetes	o__Streptosporangiales	f__Thermomonosporaceae	g__Thermomonospora	2726	2516	1952	3568	2976	3634	3494	3814	3362	3668	3508	3410	4266	3636	2902	2148	1236	2006	4244	4062	6670	8298	3086	2606	7010	7124	7430	5574	7584	8112	20114	17646	17496	21592	22580	16348	2398	3492.67	2699	4827.67	7139	19296	242398
d__Bacteria	k__unclassified_d__Bacteria	p__Pseudomonadota	c__Gammaproteobacteria	o__unclassified_c__Gammaproteobacteria	f__Candidatus_Competibacteraceae	g__Candidatus_Competibacter	14382	10956	11176	11390	9686	11442	11758	12920	11322	12556	13878	11968	16498	12320	10666	12224	18032	8334	24700	21882	28462	38476	35628	32592	40424	37704	36760	32856	30448	45398	19802	19174	18476	20236	18646	18648	12171.3	11880	13012.3	30290	37265	19163.7	741820
d__Bacteria	k__unclassified_d__Bacteria	p__Pseudomonadota	c__Alphaproteobacteria	o__Rhodobacterales	f__Roseobacteraceae	g__Tateyamaria	6686	4224	5054	4548	3862	4412	4858	6456	4506	4374	4262	4860	6372	3626	3172	2972	2738	2606	8944	7050	11026	13418	7036	6886	6058	5716	6312	3946	6888	6532	23340	17664	20426	14748	19274	19480	5321.33	4682	3581	9060	5908.67	19155.3	284332
d__Bacteria	k__unclassified_d__Bacteria	p__Actinomycetota	c__Actinomycetes	o__Acidothermales	f__Acidothermaceae	g__Acidothermus	4020	2948	2826	1854	1570	2074	2388	2480	2240	2242	2378	2220	3536	2846	2100	1356	744	1098	3300	3290	5116	6440	2322	1898	5206	5036	5544	3978	5376	6294	20236	17932	17492	20866	21462	16182	3264.67	2160.67	1946.67	3727.67	5239	19028.3	208890
d__Bacteria	k__unclassified_d__Bacteria	p__Pseudomonadota	c__Alphaproteobacteria	o__Hyphomicrobiales	f__unclassified_o__Hyphomicrobiales	g__Nordella	7788	5730	6272	10014	7990	8660	8444	10592	7232	8966	8944	8520	11754	8582	7290	9344	5910	7144	4152	3630	4874	4952	4836	3714	6626	5250	5824	4308	7144	6886	18496	16322	17244	21260	22880	17352	6596.67	8818	8337.33	4359.67	6006.33	18925.7	324926
d__Bacteria	k__unclassified_d__Bacteria	p__Pseudomonadota	c__Alphaproteobacteria	o__Hyphomicrobiales	f__Parvibaculaceae	g__Kaustia	7514	5174	6172	14592	12008	12060	11184	13516	9426	10002	10552	8954	11946	8130	7116	10354	6166	9538	5068	4312	5764	5878	7776	6198	6066	4660	5158	4318	7584	6816	18730	16292	17124	20830	22922	17500	6286.67	11366	8875	5832.67	5767	18899.7	357400
d__Bacteria	k__unclassified_d__Bacteria	p__Pseudomonadota	c__Alphaproteobacteria	o__Hyphomicrobiales	f__Rhizobiaceae	g__Rhizobium	16710	13600	14848	38638	31036	35720	37620	46100	31352	37896	38838	38042	30972	21796	63132	17760	14950	17558	12450	9826	11992	13862	17718	13156	17824	16764	17652	13932	18834	20792	18546	16816	17304	20542	21698	17874	15052.7	37249.1	27694.7	13167.3	17633	18796.7	844150
d__Bacteria	k__unclassified_d__Bacteria	p__Pseudomonadota	c__Gammaproteobacteria	o__Xanthomonadales	f__Xanthomonadaceae	g__Arenimonas	18584	12568	13074	5402	4572	5876	6356	7146	5746	5778	6324	5886	38230	22826	20134	33364	34750	27210	8304	6652	8924	9564	8994	8262	12802	12128	12030	12292	16124	16344	19808	18612	18926	20162	17548	17342	14742	5898.44	29419	8450	13620	18733	518644
d__Bacteria	k__unclassified_d__Bacteria	p__Verrucomicrobiota	c__Verrucomicrobiae	o__Verrucomicrobiales	f__Verrucomicrobiaceae	g__Luteolibacter	23926	89006	14478	15334	11516	19964	24296	42950	23312	31074	28774	51552	46900	20732	20742	7714	7256	7048	3626	2850	4028	4868	5284	3620	9218	9082	9682	8068	13160	13410	20008	16154	18624	18108	20454	18316	42470	27641.3	18398.7	4046	10436.7	18610.7	685134
d__Bacteria	k__unclassified_d__Bacteria	p__Planctomycetota	c__Planctomycetia	o__Planctomycetales	f__Planctomycetaceae	g__Gimesia	10582	17354	9628	42208	31154	35958	35200	48312	30666	34286	37092	32748	33180	25236	18900	30446	17962	36830	14952	14178	19452	17086	29452	21296	20666	18880	19378	21956	26276	30886	18674	16920	17766	18448	20032	19752	12521.3	36402.7	27092.3	19402.7	23007	18598.7	893792
d__Bacteria	k__unclassified_d__Bacteria	p__Pseudomonadota	c__Alphaproteobacteria	o__Sphingomonadales	f__Sphingomonadaceae	g__Sphingomonas	19274	13664	16032	25676	22656	26834	26008	30996	21736	27258	27178	25992	27176	19764	17700	19210	16508	16102	13274	10502	13382	16466	22246	19666	19874	19594	20390	17886	22582	24162	19320	17422	17518	19066	19870	17108	16323.3	26037.1	19410	15922.7	20748	18384	730092
d__Bacteria	k__unclassified_d__Bacteria	p__Actinomycetota	c__Actinomycetes	o__Micrococcales	f__Microbacteriaceae	g__Cryobacterium	4264	4094	3224	5666	4928	6034	5828	6356	6340	6492	6564	6712	8192	5806	4738	4710	3318	4346	5186	5280	7918	9828	4354	3564	8996	8754	9510	7016	9358	10756	19230	16882	17430	19546	21080	15998	3860.67	6102.22	5185	6021.67	9065	18361	298298
d__Bacteria	k__unclassified_d__Bacteria	p__Thermodesulfobacteriota	c__Desulfobulbia	o__Desulfobulbales	f__Desulfocapsaceae	g__Desulfopila	9856	16424	8680	32388	26514	40534	37954	31048	87774	31388	41782	38140	15612	15334	12480	8530	11026	8984	23952	19532	22604	20836	22148	16902	58900	65816	67922	60446	62686	101394	18500	17850	17994	18554	17146	18562	11653.3	40835.8	11994.3	20995.7	69527.3	18101	1126192
d__Bacteria	k__unclassified_d__Bacteria	p__Cyanobacteriota	c__Cyanophyceae	o__Leptolyngbyales	f__Leptolyngbyaceae	g__Leptolyngbya	19812	13642	15538	20548	18004	21762	21274	22764	22606	22024	23342	20984	30206	24930	20756	19728	20460	16154	28380	20546	18902	24530	29346	23784	25118	22920	22752	22022	22158	28932	18318	17556	16976	18536	18608	18218	16330.7	21478.7	22039	24248	23983.7	18035.3	772136
d__Bacteria	k__unclassified_d__Bacteria	p__Myxococcota	c__Myxococcia	o__Myxococcales	f__Anaeromyxobacteraceae	g__Anaeromyxobacter	23950	19766	18270	25988	22178	26476	29968	34320	26592	40558	42390	34338	21282	20982	19170	18280	17482	22406	9404	7878	10938	9576	12904	10058	21012	16988	17068	48320	27260	45564	18696	16862	17034	18816	18902	17000	20662	31423.1	19933.7	10126.3	29368.7	17885	808676
d__Bacteria	k__unclassified_d__Bacteria	p__Pseudomonadota	c__Alphaproteobacteria	o__Sphingomonadales	f__Erythrobacteraceae	g__Alteraurantiacibacter	2120	1054	2680	3242	4186	6410	4126	4406	4322	3836	3650	6120	1450	1002	1172	1174	736	2038	822	516	1362	1186	884	928	2172	1482	2006	1080	2268	1876	19134	16904	17740	15066	17404	19956	1951.33	4477.56	1262	949.667	1814	17700.7	176510
d__Bacteria	k__unclassified_d__Bacteria	p__Actinomycetota	c__Actinomycetes	o__Kitasatosporales	f__Streptomycetaceae	g__Streptacidiphilus	1906	2526	1416	2552	2320	2558	2580	2734	2510	2422	2576	2610	4140	3212	2586	1784	1266	1404	2908	2740	5026	5710	2148	1862	5344	5334	5718	4250	5856	6392	18722	16012	16420	19316	20132	14928	1949.33	2540.22	2398.67	3399	5482.33	17588.3	201920
d__Bacteria	k__unclassified_d__Bacteria	p__Actinomycetota	c__Actinomycetes	o__Streptosporangiales	f__Streptosporangiaceae	g__Microbispora	3530	3270	2716	4422	3806	4324	4542	4674	4280	4352	4386	4138	5252	4080	3794	2442	1734	2316	3766	3774	5684	7604	2888	2982	7396	7094	7580	5854	7244	8612	18376	16248	16114	19170	20412	15038	3172	4324.89	3269.67	4449.67	7296.67	17559.7	243894
d__Bacteria	k__unclassified_d__Bacteria	p__Pseudomonadota	c__Alphaproteobacteria	o__Hyphomicrobiales	f__Stappiaceae	g__Roseibium	14428	10512	12158	38422	31580	35650	36836	46144	31972	39092	38778	38896	25034	17036	16478	13662	9724	14630	15876	12848	15762	20026	20866	15474	20052	19196	19926	13900	21470	22464	17560	15124	16136	18122	20114	17798	12366	37485.6	16094	16808.7	19501.3	17475.7	793746
d__Bacteria	k__unclassified_d__Bacteria	p__Planctomycetota	c__Planctomycetia	o__Pirellulales	f__Lacipirellulaceae	g__Bythopirellula	6940	9452	6812	121374	86716	97504	102616	161192	80910	103748	104730	105160	61596	39714	29778	18758	13522	20116	9120	8752	11698	11976	11026	10582	18294	16960	17856	16004	21104	26134	17500	15640	16300	17854	18376	18668	7734.67	107106	30580.7	10525.7	19392	17389.7	1454482
d__Bacteria	k__unclassified_d__Bacteria	p__Chloroflexota	c__Chloroflexia	o__Chloroflexales	f__Chloroflexaceae	g__Chloroflexus	11210	9866	9322	15194	13510	17224	17692	17248	19688	17508	19926	16734	24052	21684	15694	17144	15626	15562	11532	10792	13590	11010	7472	6570	19728	17594	17822	15076	14162	21182	17174	16324	15946	18152	18558	17458	10132.7	17191.6	18293.7	10161	17594	17268.7	565026
d__Bacteria	k__unclassified_d__Bacteria	p__Pseudomonadota	c__Gammaproteobacteria	o__Cellvibrionales	f__Halieaceae	g__Pseudohalioglobus	10696	8676	7802	6444	5856	7860	7892	8504	9128	6352	7780	6548	10118	8150	6968	7222	9104	4450	21622	19576	21332	36692	16704	16670	53148	58644	59550	39008	50554	48730	19806	18318	18612	14752	14746	17128	9058	7373.78	7668.67	22099.3	51605.7	17227	685142
d__Bacteria	k__unclassified_d__Bacteria	p__Deinococcota	c__Deinococci	o__Deinococcales	f__Deinococcaceae	g__Deinococcus	15632	11822	12552	20788	18774	23034	23516	24868	25080	25334	27210	24046	26876	22302	15886	19940	14012	18140	11918	11062	13906	15776	9774	8906	21882	19842	19806	18440	16704	24696	17362	16208	16352	17490	18454	17066	13335.3	23627.8	19526	11890.3	20228.3	17155.3	665456
d__Bacteria	k__unclassified_d__Bacteria	p__Pseudomonadota	c__Alphaproteobacteria	o__Sphingomonadales	f__Erythrobacteraceae	g__Erythrobacter	30824	15952	23264	12468	11798	16336	14162	17976	13542	13658	12880	16296	20192	13104	11898	24548	20068	19104	27460	15032	11744	63540	20982	29318	11334	11152	11238	8656	12744	12870	16824	15228	16166	17396	19496	15760	23346.7	14346.2	18152.3	28012.7	11332.3	16811.7	645010
d__Bacteria	k__unclassified_d__Bacteria	p__Pseudomonadota	c__Alphaproteobacteria	o__Rhodospirillales	f__Azospirillaceae	g__Azospirillum	13524	9830	10544	48268	41400	40904	38280	45970	29256	31890	31848	28320	27514	22940	17448	13678	11524	15646	14718	11634	16616	14396	27512	22050	15900	14524	15142	14160	16434	19226	17552	15840	16582	17164	17438	15792	11299.3	37348.4	18125	17821	15897.7	16728	781464
d__Bacteria	k__unclassified_d__Bacteria	p__Thermodesulfobacteriota	c__Desulfuromonadia	o__Geobacterales	f__Geobacteraceae	g__Geobacter	25386	24754	23460	30384	28008	38294	43154	44850	45784	63358	71006	52362	25858	22276	18038	21440	22790	28108	18514	14932	17844	9682	13002	10802	21434	18644	18652	31620	21318	34380	17106	16738	16112	16976	16176	17036	24533.3	46355.6	23085	14129.3	24341.3	16690.7	960278
d__Bacteria	k__unclassified_d__Bacteria	p__Pseudomonadota	c__Betaproteobacteria	o__Burkholderiales	f__Sphaerotilaceae	g__Aquincola	50668	31988	35232	6896	5876	6922	8078	9894	6892	8180	9044	8894	43720	25112	21626	23300	22496	12418	3266	2342	2912	3066	3550	3020	5158	4878	5058	4068	5006	6308	17006	16340	16278	19180	16458	14566	39296	7852.89	24778.7	3026	5079.33	16638	485696
d__Bacteria	k__unclassified_d__Bacteria	p__Balneolota	c__Balneolia	o__Balneolales	f__Balneolaceae	g__Fodinibius	24748	21198	21606	25000	23666	30796	32524	32336	37198	28940	33832	28758	30186	29310	21376	27994	23220	26458	20904	18016	22958	11364	13060	10104	24842	21624	21390	25780	20368	32574	16430	16118	15782	16558	16716	18160	22517.3	30338.9	26424	16067.7	24429.7	16627.3	841894
d__Bacteria	k__unclassified_d__Bacteria	p__Actinomycetota	c__Thermoleophilia	o__Miltoncostaeales	f__Miltoncostaeaceae	g__Miltoncostaea	13056	14674	11048	23522	19066	25252	31502	37446	25186	29078	27860	29432	18294	15962	11758	13972	7038	13432	28484	26518	35194	31016	21966	16338	40636	39068	40738	38434	41432	63260	16860	15692	15002	17468	18132	15878	12926	27593.8	13409.3	26586	43928	16505.3	889694
d__Bacteria	k__unclassified_d__Bacteria	p__Planctomycetota	c__Planctomycetia	o__Pirellulales	f__Pirellulaceae	g__Anatilimnocola	4966	6618	3974	22512	14608	16590	17106	25624	14110	14756	15600	14062	65272	41782	30008	15654	17274	11000	6670	6734	9146	9360	9018	7352	10360	9252	10008	10238	13276	15838	16948	14820	15612	17476	17382	16708	5186	17218.7	30165	8046.67	11495.3	16491	567714
d__Bacteria	k__unclassified_d__Bacteria	p__Pseudomonadota	c__Gammaproteobacteria	o__Cellvibrionales	f__Halieaceae	g__Parahaliea	13446	9548	9650	11620	11408	15352	14688	18986	14210	10700	11996	11724	13962	10610	9220	9716	10842	7432	17826	15222	18056	25684	16502	15672	48948	52246	54438	37410	46478	47112	18690	18024	17894	14308	13400	16502	10881.3	13409.3	10297	18160.3	47772	16469.7	709522
d__Bacteria	k__unclassified_d__Bacteria	p__Chloroflexota	c__Chloroflexia	o__Chloroflexales	f__Oscillochloridaceae	g__Candidatus_Chloroploca	7714	7596	6574	10184	9664	13326	13632	12686	15926	11124	13240	11890	24132	19644	14122	14852	14044	11560	9124	9172	11540	9034	4926	4250	19294	17274	17592	14114	12888	19514	15988	15824	15214	17332	17392	16530	7294.67	12408	16392.3	8007.67	16779.3	16380	478912
d__Bacteria	k__unclassified_d__Bacteria	p__Planctomycetota	c__Planctomycetia	o__Pirellulales	f__Pirellulaceae	g__Mariniblastus	11058	12550	10782	31032	20438	21938	21408	31086	17280	18852	18816	19894	56732	36648	28038	15718	16856	9638	10728	9794	12544	19454	10862	10518	13032	11584	12524	13024	18664	20128	16392	14418	15762	16406	18052	17190	11463.3	22304.9	27271.7	12316.7	14826	16370	659840
d__Bacteria	k__unclassified_d__Bacteria	p__Bacteroidota	c__Saprospiria	o__Saprospirales	f__Lewinellaceae	g__Lewinella	17256	7632	11492	5208	4734	6476	6258	7126	6842	5386	5544	6264	24194	15050	12196	27944	41636	23538	12294	14750	15330	12680	12408	7984	17358	15498	16388	18352	29022	24474	18424	16990	18186	14324	12688	16866	12126.7	5982	24093	12574.3	20182	16246.3	528792
d__Bacteria	k__unclassified_d__Bacteria	p__Actinomycetota	c__Nitriliruptoria	o__Salsipaludibacterales	f__Salsipaludibacteraceae	g__Salsipaludibacter	18084	9870	12538	17170	15560	18764	17808	17916	18104	17168	17318	16028	20180	15764	13334	10462	3812	10864	26496	21672	22126	50200	47338	37558	21548	23082	24802	13280	20510	19326	16918	15116	14796	16858	18292	15490	13497.3	17315.1	12402.7	34231.7	20424.7	16245	696152
d__Bacteria	k__unclassified_d__Bacteria	p__Actinomycetota	c__Acidimicrobiia	o__Acidimicrobiales	f__Acidimicrobiaceae	g__Acidiferrimicrobium	19940	11978	14676	23616	19484	22346	21800	23960	19078	24064	24416	22958	17306	14008	12134	8450	3418	9812	6572	6404	8222	14800	8688	7662	10310	10104	10740	7182	11002	11046	16714	14998	14784	16708	18308	15068	15531.3	22413.6	10854.7	8724.67	10064	16096.7	522756
d__Bacteria	k__unclassified_d__Bacteria	p__Actinomycetota	c__Actinomycetes	o__Micrococcales	f__Intrasporangiaceae	g__Terrabacter	2656	3146	2288	3634	3064	4568	5430	5796	6430	5906	5956	8102	4474	5432	2840	8468	2850	20248	2964	3002	4488	5570	2084	1638	6010	6192	6754	4346	5766	6618	16410	14272	14254	17692	19398	13262	2696.67	5431.78	7385.33	3291	5947.67	15881.3	252008
d__Bacteria	k__unclassified_d__Bacteria	p__Thermodesulfobacteriota	c__Syntrophobacteria	o__Syntrophobacterales	f__Syntrophobacteraceae	g__Desulforhabdus	15486	12358	14780	8786	8210	11612	13268	13286	15450	11850	14602	11324	11424	11498	9316	6724	8034	7828	38916	29468	28226	9318	18320	7560	18094	15776	15670	23834	15120	26844	15810	15826	14330	16380	15332	17424	14208	12043.1	9137.33	21968	19223	15850.3	548084
d__Bacteria	k__unclassified_d__Bacteria	p__Spirochaetota	c__Spirochaetia	o__Spirochaetales	f__Spirochaetaceae	g__Alkalispirochaeta	9920	7084	10750	12814	12144	17154	18334	17900	21016	13584	15894	14022	10180	10368	8562	4920	6726	6866	54316	39744	39822	14686	24938	19762	49590	43910	44326	53096	39174	72406	15864	16606	15174	15584	14494	16564	9251.33	15873.6	7937	32211.3	50417	15714.3	808294
d__Bacteria	k__unclassified_d__Bacteria	p__Pseudomonadota	c__Alphaproteobacteria	o__Hyphomicrobiales	f__Methylobacteriaceae	g__Microvirga	13186	10688	10198	49168	40446	43856	44428	54670	34316	40932	39918	36936	35104	26066	19196	15558	12854	15708	12338	10954	14096	13688	17250	14296	17840	16644	17062	13888	17202	20390	15844	14536	14580	16286	16978	15110	11357.3	42741.1	20747.7	13770.3	17171	15555.7	822210
d__Bacteria	k__unclassified_d__Bacteria	p__Thermodesulfobacteriota	c__Desulfobacteria	o__Desulfobacterales	f__Desulfobacteraceae	g__Desulfobacter	12596	9536	13446	14160	15000	23968	28866	27044	34748	19294	26008	21108	14974	13418	10868	8086	10342	13626	29530	24018	23574	10382	16502	10480	45574	42828	42384	64898	41342	76948	15580	15574	14190	16120	15366	16040	11859.3	23355.1	11885.7	19081	52329	15478.3	838418
d__Bacteria	k__unclassified_d__Bacteria	p__Actinomycetota	c__Actinomycetes	o__Micrococcales	f__Intrasporangiaceae	g__Janibacter	2250	2036	1690	2266	1782	2470	2448	2442	2740	2174	2136	2408	3364	2536	2582	2506	1476	2516	3478	3562	5182	6826	2794	2052	6712	7112	7556	5294	7382	8210	16212	14024	14022	16856	18348	13260	1992	2318.44	2496.67	3982.33	7044.33	15453.7	200704
d__Bacteria	k__unclassified_d__Bacteria	p__Actinomycetota	c__Actinomycetes	o__Streptosporangiales	f__Thermomonosporaceae	g__Actinoallomurus	2820	2712	2054	3994	3252	3880	4026	4324	3836	4424	4314	4004	4894	4030	3194	2148	1410	2232	3368	3232	5136	6006	2902	2456	5350	5658	5712	4406	6014	6586	16236	13970	13798	16678	17600	13298	2528.67	4006	2984.67	3850	5621	15263.3	209954
d__Bacteria	k__unclassified_d__Bacteria	p__Actinomycetota	c__Actinomycetes	o__Propionibacteriales	f__Propionibacteriaceae	g__Propioniciclava	2230	2096	1726	2704	2304	2972	2796	2624	3264	2990	2732	3142	4156	3148	2560	2476	1254	2208	3012	3012	4464	5348	2500	2050	6406	6728	7234	4634	6350	7194	15450	13824	13754	16412	18292	13402	2017.33	2836.44	2633.67	3397.67	6424.33	15189	197448
d__Bacteria	k__unclassified_d__Bacteria	p__Pseudomonadota	c__Gammaproteobacteria	o__Chromatiales	f__Chromatiaceae	g__Halochromatium	4438	3568	3284	2896	2656	2818	3110	3252	3010	2956	3110	2920	5452	4298	3768	4076	4816	2716	37222	42684	40004	33054	19402	19298	59798	55532	56498	38342	54298	52674	15132	14732	13640	16936	15238	14156	3763.33	2969.78	4187.67	31944	52857	14972.3	661784
d__Bacteria	k__unclassified_d__Bacteria	p__Planctomycetota	c__Planctomycetia	o__Planctomycetales	f__Planctomycetaceae	g__Planctomyces	11228	11028	9220	33240	25672	29790	29922	38554	26418	27958	29334	26006	34452	25342	18870	18740	17146	15492	9904	9228	12494	11554	15352	12030	13358	12086	12432	12386	14784	18334	15042	13720	14006	15376	16096	15544	10492	29654.9	21673.7	11760.3	13896.7	14964	672138
d__Bacteria	k__unclassified_d__Bacteria	p__Pseudomonadota	c__Betaproteobacteria	o__Rhodocyclales	f__Azonexaceae	g__Dechloromonas	15276	11434	11018	7798	6830	7566	7868	8410	7278	8418	8558	8000	22084	13668	11658	11168	11226	7232	3430	2882	3652	4166	4134	3420	9036	8576	8778	7130	7446	8874	15768	15198	14528	16962	13680	13550	12576	7858.44	12839.3	3614	8306.67	14947.7	346700
d__Bacteria	k__unclassified_d__Bacteria	p__Actinomycetota	c__Actinomycetes	o__Propionibacteriales	f__Nocardioidaceae	g__Mumia	1024	1332	794	3684	2890	3428	3226	3402	2968	2616	2730	3076	3684	2878	2512	2146	1210	2352	4800	4886	6480	8070	3486	2552	8480	9036	9548	7026	9472	10384	15476	13422	13382	16698	17632	12968	1050	3113.33	2463.67	5045.67	8991	14929.7	219750
d__Bacteria	k__unclassified_d__Bacteria	p__Planctomycetota	c__Planctomycetia	o__Pirellulales	f__Lacipirellulaceae	g__Aeoliella	5574	6720	5864	74292	55662	67268	65768	96812	57386	69950	69422	81756	47882	31716	28438	16884	11456	18022	9210	8950	11930	14914	11424	10566	17918	16438	17938	18056	26120	30930	14794	13782	13986	14886	15742	16108	6052.67	70924	25733	11165.7	21233.3	14883	1094564
d__Bacteria	k__unclassified_d__Bacteria	p__Pseudomonadota	c__Gammaproteobacteria	o__Chromatiales	f__Chromatiaceae	g__Thioflavicoccus	2594	2150	1930	1666	1460	1758	1754	2086	1822	1716	2052	1798	2970	2680	1940	2158	2512	1428	3788	3242	3566	3430	2728	2472	15408	15378	15316	9420	9414	11314	15094	14456	13500	17196	14960	13866	2224.67	1790.22	2281.33	3204.33	12708.3	14845.3	221022
d__Archaea	k__unclassified_d__Archaea	p__Euryarchaeota	c__Methanomicrobia	o__Methanosarcinales	f__Methanosarcinaceae	g__Methanosarcina	21254	17266	20466	19436	18632	25406	25714	27308	31666	18836	22044	18890	104994	72656	44490	264318	282938	208012	9506	9552	11900	8228	5254	4346	23064	20492	20188	24254	16746	26774	14298	14184	13360	15328	15360	15590	19662	23103.6	162901	8131	21919.7	14686.7	1512750
d__Bacteria	k__unclassified_d__Bacteria	p__Candidatus_Parcubacteria	c__unclassified_p__Candidatus_Parcubacteria	o__unclassified_p__Candidatus_Parcubacteria	f__unclassified_p__Candidatus_Parcubacteria	g__unclassified_p__Candidatus_Parcubacteria	17140	13672	14748	44010	42434	41180	42590	39164	37510	40386	46010	36216	26374	25026	18992	14744	12522	19430	13152	11272	15326	7640	15888	10574	18558	16052	16426	21394	14956	23028	14682	14930	14012	14652	14430	15310	15186.7	41055.6	19514.7	12308.7	18402.3	14669.3	804430
d__Bacteria	k__unclassified_d__Bacteria	p__Pseudomonadota	c__Alphaproteobacteria	o__Rhodobacterales	f__Paracoccaceae	g__Boseongicola	64892	30764	43580	11454	9992	12300	11980	14552	10960	11090	10690	12240	24386	13234	12360	13956	12430	9096	28928	20438	16708	94412	27154	30270	14406	13528	14600	10908	20176	18302	15624	12446	13962	14888	16586	14494	46412	11695.3	14243.7	36318.3	15320	14666.7	727786
d__Bacteria	k__unclassified_d__Bacteria	p__Actinomycetota	c__Actinomycetes	o__Candidatus_Actinomarinales	f__Candidatus_Actinomarinaceae	g__Candidatus_Actinomarina	63420	26750	45054	20110	17234	20732	20136	19904	18662	21244	21680	17142	27662	22516	19864	10300	2212	9104	9280	8110	8180	29322	20340	18994	8514	7764	8584	5752	8826	8340	15328	14012	14124	14352	15258	14906	45074.7	19649.3	15276.3	15704.3	7963.33	14663.3	633712
d__Bacteria	k__unclassified_d__Bacteria	p__Pseudomonadota	c__Gammaproteobacteria	o__Pseudomonadales	f__Pseudomonadaceae	g__Stutzerimonas	15834	14242	13426	16194	15442	18738	19006	19380	19772	18562	20542	16900	17786	17662	13094	11660	8856	11722	15454	12998	18428	10458	10336	9824	17352	15834	16152	12924	13142	17942	14760	14756	13826	14366	14798	15356	14500.7	18281.8	13463.3	12916.3	15557.7	14643.7	547524
d__Bacteria	k__unclassified_d__Bacteria	p__Calditrichota	c__Calditrichia	o__Calditrichales	f__Calditrichaceae	g__Caldithrix	24076	16242	20372	24812	22266	26388	28186	30840	28182	33458	36606	27298	23320	21948	16826	18662	23372	18562	18334	16796	19764	12524	20138	17364	38768	31254	31478	89812	52800	83646	14266	14568	14432	14250	14536	15662	20230	28670.7	20448.3	17486.7	54626.3	14619	961808
d__Bacteria	k__unclassified_d__Bacteria	p__Pseudomonadota	c__Betaproteobacteria	o__Nitrosomonadales	f__Sterolibacteriaceae	g__Sulfuritalea	21452	13536	14842	12734	11706	11412	11922	12348	9368	12710	13800	11182	22356	13864	12292	9934	9984	6812	3248	2598	3598	3554	5320	4408	6058	5694	5900	5108	5498	6542	15342	15538	14518	16070	12772	13388	16610	11909.1	12540.3	3787.67	5800	14604.7	377408
d__Bacteria	k__unclassified_d__Bacteria	p__Pseudomonadota	c__Gammaproteobacteria	o__Chromatiales	f__Chromatiaceae	g__Allochromatium	4126	3284	3224	1896	1676	2066	2052	2482	2220	1940	2204	2046	4466	3914	2826	3280	4132	2008	3740	3300	3444	3652	2772	2390	13872	13798	13670	7812	8248	9132	14734	13988	12956	16438	14758	13754	3544.67	2064.67	3437.67	3216.33	11088.7	14438	222300
d__Bacteria	k__unclassified_d__Bacteria	p__Actinomycetota	c__Actinomycetes	o__Cryptosporangiales	f__Cryptosporangiaceae	g__Cryptosporangium	1672	1556	1324	3940	3424	4390	4304	4544	4316	3916	3830	3898	3680	3038	2354	1540	754	1602	3430	3368	5446	5952	2482	1982	6138	6148	6294	4554	6280	6950	15062	13248	13542	15742	16274	12008	1517.33	4062.44	2161.33	3776.67	6060.67	14312.7	198982
d__Bacteria	k__unclassified_d__Bacteria	p__Thermodesulfobacteriota	c__Syntrophobacteria	o__Syntrophobacterales	f__Syntrophobacteraceae	g__Desulfoferrobacter	14996	11008	14546	5910	6346	9168	10960	11080	13322	8178	10232	8438	8010	8824	7018	4636	5154	7046	40374	29544	28376	9192	18548	7098	20010	18424	18484	25754	16170	30402	13404	14816	12830	14882	13858	15818	13516.7	9292.67	6781.33	22188.7	21540.7	14268	512856
d__Bacteria	k__unclassified_d__Bacteria	p__Pseudomonadota	c__Betaproteobacteria	o__Burkholderiales	f__Comamonadaceae	g__Delftia	12276	11522	10674	11852	11908	15786	15504	14524	19026	13850	15890	13988	17346	19066	12884	11432	9172	11994	14080	13380	17768	7410	5602	4616	16846	14684	15220	13204	10142	18882	13244	14158	12850	14934	15402	15002	11490.7	14703.1	13649	10476	14829.7	14265	486118
d__Bacteria	k__unclassified_d__Bacteria	p__Pseudomonadota	c__Betaproteobacteria	o__Rhodocyclales	f__Rhodocyclaceae	g__Aromatoleum	38262	38894	27866	11246	9648	10198	10982	12828	8544	13772	15996	13800	35072	21624	18740	14606	17560	6854	4284	3270	4438	4114	5416	4622	5594	5204	5176	4598	5488	6388	14940	14004	13494	15648	13216	12274	35007.3	11890.4	19076	4357.33	5408	13929.3	468660
d__Archaea	k__unclassified_d__Archaea	p__Euryarchaeota	c__Methanomicrobia	o__Methanosarcinales	f__unclassified_o__Methanosarcinales	g__unclassified_o__Methanosarcinales	15076	12464	13196	14972	14268	18222	19472	18808	22412	17102	20580	17368	18042	16836	12146	13404	13454	13858	16412	13822	16768	9282	9040	6936	25634	22808	22300	33798	21788	39148	13882	13388	12830	14354	13982	14704	13578.7	18133.8	14623.3	12043.3	27579.3	13856.7	612556
d__Bacteria	k__unclassified_d__Bacteria	p__Bacteroidota	c__Flavobacteriia	o__Flavobacteriales	f__Flavobacteriaceae	g__Eudoraea	31640	13246	25670	4594	3846	5118	5268	6000	5178	4662	4612	4410	9532	6946	5150	8760	12104	5192	17026	14538	11918	51224	10036	9972	17610	15786	16898	15234	20028	21146	14708	13046	14094	13316	14024	13668	23518.7	4854.22	7947.33	19119	17783.7	13809.3	466200
d__Bacteria	k__unclassified_d__Bacteria	p__Actinomycetota	c__Actinomycetes	o__Candidatus_Nanopelagicales	f__Candidatus_Nanopelagicaceae	g__Candidatus_Planktophila	1282	2016	968	1110	756	994	988	1140	1074	1164	1118	1072	2218	1830	1364	1072	980	672	1656	1524	3128	3392	1106	896	3042	3188	3310	2160	2964	3648	14570	12640	12692	15112	16068	11396	1422	1046.22	1356	1950.33	3052	13746.3	134310
d__Bacteria	k__unclassified_d__Bacteria	p__Pseudomonadota	c__Gammaproteobacteria	o__Oceanospirillales	f__Oceanospirillaceae	g__Marinobacterium	10482	8006	8428	11368	10518	12552	12212	12950	12218	10500	11742	11324	11112	8652	7838	7618	7952	6568	10448	8514	11186	12124	12144	11534	24552	24500	25906	17562	19976	23078	15020	14086	13958	12874	12112	13948	8972	11709.3	8290	10991.7	22595.7	13666.3	465562
d__Bacteria	k__unclassified_d__Bacteria	p__Pseudomonadota	c__Gammaproteobacteria	o__Alteromonadales	f__Alteromonadaceae	g__Aestuariibacter	8816	8710	7514	19492	18172	22654	22246	20242	26014	17972	20524	18856	19040	16190	11600	10506	10854	9876	15734	14310	18562	14548	14704	15280	33962	32652	31532	23808	21424	31728	13826	13372	12978	13622	13254	14436	8346.67	20685.8	13011	15523	29184.3	13581.3	639010
d__Bacteria	k__unclassified_d__Bacteria	p__Actinomycetota	c__Actinomycetes	o__Pseudonocardiales	f__Pseudonocardiaceae	g__Saccharothrix	3280	2502	2542	4702	3860	4736	4688	4948	4702	4578	4456	4372	5342	4556	4078	2968	1830	2808	3942	3808	5512	6602	3180	2768	6686	6292	6950	5342	7060	7890	14238	12266	12172	14312	15380	11724	2774.67	4560.22	3597	4302	6703.33	13348.7	217072
d__Bacteria	k__unclassified_d__Bacteria	p__Actinomycetota	c__Actinomycetes	o__Propionibacteriales	f__Nocardioidaceae	g__Thermasporomyces	674	868	480	1100	854	1122	1214	1284	1252	1012	908	864	1994	1866	1564	866	662	660	3928	4150	5912	6884	2688	2048	7010	7516	7830	5884	7554	8164	13858	12202	11868	14576	15600	11502	674	1067.78	1268.67	4268.33	7326.33	13267.7	168418
d__Bacteria	k__unclassified_d__Bacteria	p__Actinomycetota	c__Actinomycetes	o__Micrococcales	f__Intrasporangiaceae	g__Oryzihumus	600	1370	478	1020	822	1074	1156	1256	1160	900	952	988	1784	1576	1244	1254	700	1468	1934	2174	3296	3990	1334	1056	3572	3686	3858	2816	3884	4316	14190	12400	12202	14596	15266	10804	816	1036.44	1337.67	2297.33	3688.67	13243	135176
d__Bacteria	k__unclassified_d__Bacteria	p__Myxococcota	c__Myxococcia	o__Myxococcales	f__Archangiaceae	g__Archangium	17200	13240	12748	21394	17436	19496	20802	31132	18772	25986	24970	25828	20302	23026	26866	15228	12972	20822	8876	8034	10460	10352	11756	10664	16594	13094	13056	40108	23010	36832	13470	12836	12474	13680	14060	12688	14396	22868.4	19869.3	10023.7	23782.3	13201.3	650264
d__Bacteria	k__unclassified_d__Bacteria	p__Pseudomonadota	c__Betaproteobacteria	o__Burkholderiales	f__Comamonadaceae	g__Variovorax	23738	15140	16716	16664	14600	15724	16136	18728	13584	16786	17414	15786	27498	17030	14912	13800	12770	9350	5688	5214	6514	7458	7314	6268	10312	9966	9946	8690	9870	11964	13732	13058	12956	14094	12842	12376	18531.3	16158	15893.3	6409.33	10124.7	13176.3	474638
d__Bacteria	k__unclassified_d__Bacteria	p__Thermodesulfobacteriota	c__Desulfobulbia	o__Desulfobulbales	f__Desulfobulbaceae	g__Desulfobulbus	14470	12590	14226	16618	16382	25108	26532	19282	39406	19966	27228	20786	19532	36322	80428	13798	13540	22440	20878	17252	19926	20508	13338	10140	27684	24664	24934	55074	113326	55772	12976	12900	12172	14864	12908	12962	13762	23478.7	31010	17007	50242.3	13130.3	920932
d__Bacteria	k__unclassified_d__Bacteria	p__Actinomycetota	c__Actinomycetes	o__Propionibacteriales	f__Nocardioidaceae	g__Propionicimonas	940	1582	800	1246	1130	1636	1722	1678	2484	2618	2272	3882	1876	1556	1200	1126	770	1266	1424	1442	2142	2338	1088	808	2904	3066	3354	2240	2814	3542	12902	11584	12088	15114	15646	11316	1107.33	2074.22	1299	1540.33	2986.67	13108.3	135596
d__Bacteria	k__unclassified_d__Bacteria	p__Planctomycetota	c__Planctomycetia	o__Pirellulales	f__Pirellulaceae	g__Bremerella	6010	7676	4872	30028	28314	41410	29430	44262	27860	25770	28474	35700	28484	19638	15190	14730	12692	18856	9500	9084	11704	12004	11278	9940	15206	13652	14228	14186	17234	20890	13046	11716	12606	13398	13790	13968	6186	32360.9	18265	10585	15899.3	13087.3	656826
d__Bacteria	k__unclassified_d__Bacteria	p__Chloroflexota	c__Anaerolineae	o__Anaerolineales	f__Anaerolineaceae	g__Pelolinea	19752	15108	16966	15538	15198	20430	21850	21440	25928	18866	23098	20530	29698	23750	16772	31976	34898	23604	11220	10484	13238	6294	5216	4174	18950	15314	15264	25506	12912	32370	13014	12704	12282	13210	13086	13926	17275.3	20319.8	26783	8437.67	20052.7	13037	644566
d__Bacteria	k__unclassified_d__Bacteria	p__Pseudomonadota	c__Betaproteobacteria	o__Rhodocyclales	f__Zoogloeaceae	g__Thauera	18956	29692	14064	8586	7326	8062	8230	9152	6736	8570	8618	7822	20350	13648	12282	75856	89600	32816	3752	3170	4290	4438	5554	4776	7370	6776	7444	5898	7216	8302	13808	12846	12256	14388	13028	11836	20904	8122.44	40758.7	4330	7167.67	13027	527514
d__Bacteria	k__unclassified_d__Bacteria	p__Actinomycetota	c__Actinomycetes	o__Micrococcales	f__Intrasporangiaceae	g__Pedococcus	1498	1944	1194	2938	2222	2910	2920	3158	3190	3070	2984	3126	3336	2626	2022	2902	1504	3502	2102	2126	3356	4084	1618	1242	4718	4984	5568	3392	4896	5740	14078	11658	11874	14502	15336	10550	1545.33	2946.44	2648.67	2421.33	4883	12999.7	168870
d__Bacteria	k__unclassified_d__Bacteria	p__Pseudomonadota	c__Gammaproteobacteria	o__Vibrionales	f__Vibrionaceae	g__Vibrio	10824	8626	8834	10978	11018	14008	12894	14028	15934	10864	12170	12212	20088	9666	8472	8072	9128	7992	12998	11096	14052	14754	12350	11450	20424	19418	20244	16482	18686	22312	12984	12360	12834	11856	14426	12988	9428	12678.4	10569.7	12783.3	19594.3	12908	477522
d__Bacteria	k__unclassified_d__Bacteria	p__Pseudomonadota	c__Gammaproteobacteria	o__Alteromonadales	f__Shewanellaceae	g__Shewanella	10250	8000	7926	10208	9370	12140	12042	13776	11398	10604	11252	11200	11032	9146	7892	7630	8108	7140	11076	8766	12542	10678	11338	9750	17934	17530	18346	14312	16638	18738	13744	13158	13226	12308	11926	13018	8725.33	11332.2	8491.33	10691.7	17249.7	12896.7	424142
d__Bacteria	k__unclassified_d__Bacteria	p__Pseudomonadota	c__Betaproteobacteria	o__Burkholderiales	f__Comamonadaceae	g__Ramlibacter	32018	19878	22732	15418	14186	13836	15068	16632	12016	16548	16802	14902	30670	19140	16218	12026	10986	8746	4796	3960	5022	5946	6742	6196	8300	7724	7982	7190	8064	9552	13582	12778	12544	13556	12850	11800	24876	15045.3	16297.7	5443.67	8135.33	12851.7	466406
d__Bacteria	k__unclassified_d__Bacteria	p__Pseudomonadota	c__Betaproteobacteria	o__Burkholderiales	f__Sphaerotilaceae	g__Piscinibacter	74762	45322	51734	7304	6586	7798	8392	11194	6926	9830	10580	11144	30540	18234	16362	13762	13220	7698	2704	2324	2942	3036	3508	3074	5264	5216	4954	4526	5258	6452	13074	12708	12412	14376	12618	11702	57272.7	8861.56	16636	2931.33	5278.33	12815	477536
d__Bacteria	k__unclassified_d__Bacteria	p__Candidatus_Tectomicrobia	c__unclassified_p__Candidatus_Tectomicrobia	o__unclassified_p__Candidatus_Tectomicrobia	f__unclassified_p__Candidatus_Tectomicrobia	g__Candidatus_Entotheonella	12310	9744	9534	53676	48050	43968	44132	56464	32720	40674	38306	36170	24516	21482	16522	11968	9210	13666	15008	12984	16260	17744	19488	22590	24478	22664	23004	20112	20230	27596	12822	12446	12094	12874	13126	13432	10529.3	43795.6	16227.3	17345.7	23014	12799	842064
d__Bacteria	k__unclassified_d__Bacteria	p__Thermodesulfobacteriota	c__Syntrophia	o__Syntrophales	f__Syntrophaceae	g__Syntrophus	20354	16082	19026	15848	15478	21642	23980	24326	26218	29526	34010	25910	16048	15742	12258	17848	28300	18510	22250	16808	18586	7480	11148	7366	22310	20220	20080	39136	21192	40888	12592	12710	11876	13070	12806	13554	18487.3	24104.2	18117.7	13939.7	27304.3	12768	705178
d__Bacteria	k__unclassified_d__Bacteria	p__Planctomycetota	c__Planctomycetia	o__Planctomycetales	f__Planctomycetaceae	g__Symmachiella	5886	6240	4790	24974	18386	20080	19972	27208	17732	19642	21122	18250	22912	17652	13426	11534	10046	11224	9276	8536	11974	10398	18650	12900	13188	12086	12648	12394	14624	18242	13146	11726	12414	12558	13308	13346	5638.67	20818.4	14465.7	11955.7	13863.7	12749.7	522490
d__Bacteria	k__unclassified_d__Bacteria	p__Actinomycetota	c__Actinomycetes	o__Catenulisporales	f__Catenulisporaceae	g__Catenulispora	2224	2140	1702	3132	2596	2916	3242	3432	2920	3232	3366	2882	3406	2800	2220	1586	1060	1630	2744	2712	4534	4934	1898	1450	4552	4422	4816	3604	4736	5470	13332	11884	11804	13882	14296	10910	2022	3079.78	2117	3045.33	4600	12684.7	168466
d__Bacteria	k__unclassified_d__Bacteria	p__Chlorobiota	c__Chlorobiia	o__Chlorobiales	f__Chlorobiaceae	g__Chlorobium	7154	5470	6896	11244	8986	9770	8364	7474	11518	7856	10060	7424	13010	15264	13426	11940	33394	9244	4488	4172	4454	2998	3432	2406	11646	8904	9056	37432	15622	33684	12736	14284	14146	11332	10770	12684	6506.67	9188.44	16046.3	3658.33	19390.7	12658.7	412740
d__Bacteria	k__unclassified_d__Bacteria	p__Planctomycetota	c__Planctomycetia	o__Pirellulales	f__Thermoguttaceae	g__Thermogutta	4314	5070	3828	10588	7650	9808	9334	11544	9252	11032	12528	9388	16618	15610	11164	10718	11096	8286	5976	5728	8384	5976	4596	4148	8146	6780	7358	10376	10630	14554	12906	11612	12218	12898	12826	13422	4404	10124.9	12248.7	5801.33	9640.67	12647	346362
d__Bacteria	k__unclassified_d__Bacteria	p__Pseudomonadota	c__Alphaproteobacteria	o__Hyphomicrobiales	f__Methylobacteriaceae	g__Methylobacterium	8972	7346	6782	20680	17474	19636	19328	23782	15378	18894	18934	18110	20414	14716	12056	11066	9920	9728	8452	7036	9030	10448	11218	9512	11354	10638	11184	9494	12502	13488	12626	11882	11510	13520	13748	12242	7700	19135.1	12983.3	9282.67	11443.3	12588	473100
d__Bacteria	k__unclassified_d__Bacteria	p__Pseudomonadota	c__Alphaproteobacteria	o__Rhodobacterales	f__Roseobacteraceae	g__Tropicimonas	14022	17718	11214	33658	30412	38390	31008	37952	40206	34918	37254	40876	33754	19708	16562	30352	44870	19110	12978	9972	10208	23626	13890	12918	26738	27610	30462	16604	26416	28714	13254	10760	11810	12724	14428	12518	14318	36074.9	27392.7	13932	26090.7	12582.3	847614
d__Bacteria	k__unclassified_d__Bacteria	p__Pseudomonadota	c__Alphaproteobacteria	o__Hyphomicrobiales	f__Reyranellaceae	g__Reyranella	11148	7646	7846	25298	21188	22616	23454	29144	18258	22974	22266	20474	19278	13514	10750	11056	8306	10692	7288	6708	7842	7814	10228	8552	10356	9876	10242	7594	10656	11468	12804	11776	11636	13120	13270	11908	8880	22852.4	12266	8072	10032	12419	489046
d__Bacteria	k__unclassified_d__Bacteria	p__Pseudomonadota	c__Alphaproteobacteria	o__Rhodobacterales	f__Paracoccaceae	g__Paracoccus	12618	9476	9434	13890	11852	14264	13414	17284	13214	13622	13432	15250	20960	13068	11458	15002	14288	12184	7834	6164	6360	11698	10112	9266	8946	8908	9792	6646	9676	10222	12566	10278	11286	13302	14336	11498	10509.3	14024.7	14493.3	8572.33	9031.67	12211	423600
d__Bacteria	k__unclassified_d__Bacteria	p__Pseudomonadota	c__Alphaproteobacteria	o__Caulobacterales	f__Caulobacteraceae	g__Phenylobacterium	10138	7588	7716	15130	13434	14924	15274	18314	12030	15490	15024	14048	16720	12156	10014	10980	9516	9210	6056	5230	6844	7274	7908	7048	10778	10320	10290	9298	12034	12266	13044	11484	11280	12954	12714	11350	8480.67	14852	11432.7	6726.67	10831	12137.7	405878
d__Bacteria	k__unclassified_d__Bacteria	p__Pseudomonadota	c__Gammaproteobacteria	o__Cellvibrionales	f__Spongiibacteraceae	g__Oceanicoccus	8206	5094	5902	4352	5054	5674	5592	9350	4506	4552	4572	5328	5864	4684	4168	3270	3272	3022	4808	4042	6010	4724	4850	4434	8962	9484	9204	6336	7638	8752	13442	13500	12888	10142	9694	13154	6400.67	5442.22	4046.67	4811.33	8396	12136.7	244526
d__Bacteria	k__unclassified_d__Bacteria	p__Pseudomonadota	c__Betaproteobacteria	o__Burkholderiales	f__Burkholderiaceae	g__Burkholderia	21502	13718	15222	14260	12362	13448	13946	15750	11856	14666	15154	13672	26704	19498	15822	11466	11210	8910	5746	5126	6150	7358	8202	7022	11474	11258	11594	9248	10260	11764	12432	11648	11840	12848	12648	11010	16814	13901.6	15601.7	6600.67	10933	12071	446794
d__Bacteria	k__unclassified_d__Bacteria	p__Actinomycetota	c__Actinomycetes	o__Pseudonocardiales	f__Pseudonocardiaceae	g__Actinokineospora	1956	1894	1412	3706	2942	3638	3544	3716	3390	3628	3830	3514	3488	3210	2504	2004	1396	1892	3316	3178	4804	5756	2758	2324	5044	5084	5334	3862	5600	5946	12514	11124	11234	13136	13976	10242	1754	3545.33	2415.67	3689.33	5145	12037.7	176896
d__Bacteria	k__unclassified_d__Bacteria	p__Actinomycetota	c__Actinomycetes	o__Streptosporangiales	f__Streptosporangiaceae	g__Streptosporangium	2058	2012	1474	3912	3368	3994	4004	4266	3852	4234	4356	3904	4168	3696	2962	2300	1418	2286	2908	2848	4382	5314	2560	2250	4852	4972	5518	4110	5304	6016	12614	10942	10814	13270	13924	10206	1848	3987.78	2805	3377	5128.67	11961.7	181068
d__Bacteria	k__unclassified_d__Bacteria	p__Pseudomonadota	c__Alphaproteobacteria	o__Rhodobacterales	f__Paracoccaceae	g__Pseudorhodobacter	4326	3306	3120	1848	1664	2096	2250	2660	2342	2176	2024	2392	5416	3540	3078	3374	3274	2518	2608	2182	3042	4764	2450	2234	2988	2772	3270	2198	3574	3798	12248	10486	10846	13924	14332	9766	3584	2161.33	3533.33	2880	3100	11933.7	158886
d__Bacteria	k__unclassified_d__Bacteria	p__Planctomycetota	c__Planctomycetia	o__Isosphaerales	f__Isosphaeraceae	g__Tautonia	6242	6432	5086	15838	12266	14140	14622	18868	13148	15464	16662	14254	33252	23322	17526	15402	11756	14112	6160	5916	7628	7942	7452	6378	10348	9218	9474	11030	11958	14776	11996	10758	11282	12536	12822	11908	5920	15029.1	19228.3	6912.67	11134	11883.7	447974
d__Bacteria	k__unclassified_d__Bacteria	p__Pseudomonadota	c__Alphaproteobacteria	o__Hyphomicrobiales	f__Phyllobacteriaceae	g__Hoeflea	11076	9272	9010	24802	20032	23512	24340	31928	21362	24632	26064	25688	18910	12228	10786	12066	9112	11776	8350	6514	8382	10100	13274	8494	12176	11984	12962	8242	13194	13688	11696	9682	10380	13576	14474	10800	9786	24706.7	12479.7	9185.67	12041	11768	524564
d__Bacteria	k__unclassified_d__Bacteria	p__Pseudomonadota	c__Alphaproteobacteria	o__Hyphomicrobiales	f__Phyllobacteriaceae	g__Oricola	10318	7038	8872	29144	23056	28470	30372	39174	26020	31574	32452	32402	19140	12628	9654	10376	8520	10856	7862	6086	7406	9918	13752	7238	12322	12114	12668	8086	13408	14070	11190	9664	10512	13208	14528	11192	8742.67	30296	11862.3	8710.33	12111.3	11715.7	565290
d__Bacteria	k__unclassified_d__Bacteria	p__Thermodesulfobacteriota	c__Desulfobacteria	o__Desulfatiglandales	f__Desulfatiglandaceae	g__Desulfatiglans	21860	16030	21918	10750	10656	16030	19358	16718	24276	15188	20088	14722	13348	13746	10990	12648	18272	13498	20880	15858	16080	5870	10286	6068	40890	35010	34682	184536	60632	129266	11406	11522	10590	12180	11716	12632	19936	16420.7	13750.3	12507	80836	11674.3	920200
d__Bacteria	k__unclassified_d__Bacteria	p__Actinomycetota	c__Actinomycetes	o__Kineosporiales	f__Kineosporiaceae	g__Quadrisphaera	930	1204	624	1354	964	1332	1128	1334	1132	1076	1216	1060	2042	1712	1412	808	596	616	2892	2700	4326	5312	1956	1548	4036	4256	4608	3444	4572	5074	12450	10734	10230	12426	13298	10030	919.333	1177.33	1197.67	3122.33	4331.67	11528	134432
d__Bacteria	k__unclassified_d__Bacteria	p__Thermodesulfobacteriota	c__Syntrophobacteria	o__Syntrophobacterales	f__Syntrophobacteraceae	g__Desulfacinum	15096	11780	14834	5804	6066	9338	11212	10986	12022	10646	12636	9770	7426	7440	6288	5172	6282	6734	40008	29288	28024	9054	18326	6716	15808	13702	13416	26238	14828	27430	11000	12188	10572	11118	10924	13100	13903.3	9831.11	6557	21902.7	18570.3	11483.7	481272
d__Bacteria	k__unclassified_d__Bacteria	p__Planctomycetota	c__Planctomycetia	o__Pirellulales	f__Pirellulaceae	g__Roseiconus	3704	4936	3414	14450	10204	13102	13138	17696	11810	12202	12762	13136	18784	13354	10294	16500	13888	11600	13644	13680	18508	22154	13572	11446	20284	18164	19194	20940	26708	30248	11142	9982	10318	11444	12596	12298	4018	13166.7	14070	15500.7	22589.7	11296.7	511296
d__Bacteria	k__unclassified_d__Bacteria	p__Actinomycetota	c__Actinomycetes	o__Kitasatosporales	f__Streptomycetaceae	g__Embleya	1192	1494	934	1648	1418	1626	1720	1780	1624	1664	1604	1788	2476	2036	1534	1048	716	954	2000	2020	3284	3750	1510	1286	3266	3252	3682	2582	3604	4082	12228	10198	10232	12448	13042	9500	1206.67	1652.44	1460.67	2308.33	3411.33	11274.7	129222
d__Bacteria	k__unclassified_d__Bacteria	p__Pseudomonadota	c__Alphaproteobacteria	o__Rhodobacterales	f__Roseobacteraceae	g__Shimia	8934	7332	7282	10016	8500	10206	10632	12538	10484	9948	9890	10294	10562	7186	6050	5786	5648	4858	9870	8562	10124	12404	9982	10226	13324	12328	13364	8568	11076	12734	11902	10362	10720	11276	11542	11358	7849.33	10278.7	6681.67	10194.7	11899	11193.3	355868
d__Bacteria	k__unclassified_d__Bacteria	p__Cyanobacteriota	c__Cyanophyceae	o__Nostocales	f__Nostocaceae	g__Nostoc	7948	6798	6648	14820	12388	15940	15584	16788	17100	15508	17858	15678	16764	13708	11296	10830	9644	10014	12596	11320	10898	18360	9652	9420	18292	17096	16892	15018	13902	20332	11172	10644	10488	11720	11736	11400	7131.33	15740.4	12042.7	12041	16922	11193.3	476252
d__Bacteria	k__unclassified_d__Bacteria	p__Myxococcota	c__unclassified_p__Myxococcota	o__Polyangiales	f__Polyangiaceae	g__Sorangium	15226	12944	10250	28752	22114	23204	23372	29704	18662	32532	29194	28542	23146	41926	43062	24850	12732	40018	6800	5918	8186	8610	11698	12712	14634	10304	10026	43650	23578	36172	11550	10742	10710	11440	11782	10696	12806.7	26230.7	30955.7	8987.33	23060.7	11153.3	719438
d__Bacteria	k__unclassified_d__Bacteria	p__Cyanobacteriota	c__unclassified_p__Cyanobacteriota	o__unclassified_p__Cyanobacteriota	f__unclassified_p__Cyanobacteriota	g__unclassified_p__Cyanobacteriota	10328	7270	7678	25838	21794	23338	23644	25622	19852	24348	24186	23096	17810	15428	12944	10312	6516	12234	14400	10756	10700	14238	13698	11720	13864	13210	13456	13694	14334	17282	11316	10488	10538	11658	12248	10548	8425.33	23524.2	12540.7	12585.3	14306.7	11132.7	540386
d__Bacteria	k__unclassified_d__Bacteria	p__Planctomycetota	c__Planctomycetia	o__Isosphaerales	f__Isosphaeraceae	g__Singulisphaera	5868	6260	4794	18148	13938	15392	15924	19726	14398	17278	17760	15558	26426	18312	13482	10444	9024	9762	5608	5120	7152	5692	7644	6722	8950	7086	7626	12250	10358	14254	11418	10190	10522	11506	11674	11066	5640.67	16458	14575	6323	10087.3	11062.7	417332
d__Bacteria	k__unclassified_d__Bacteria	p__Planctomycetota	c__Phycisphaerae	o__Phycisphaerales	f__Phycisphaeraceae	g__Phycisphaera	7242	8410	5504	12942	10260	11666	12138	14958	10242	12350	12482	10948	43482	31794	28210	20022	35820	10978	6420	5748	8008	8044	11806	10028	9748	8556	8998	13848	13566	17254	10818	10246	10606	11562	11720	11136	7052	11998.4	28384.3	8342.33	11995	11014.7	487560
d__Bacteria	k__unclassified_d__Bacteria	p__Actinomycetota	c__Acidimicrobiia	o__Acidimicrobiales	f__Iamiaceae	g__Aquihabitans	10424	6344	7912	30354	23936	25092	23032	26094	19852	23548	22586	23634	24048	16056	15280	10084	4706	11884	6234	5848	7544	13610	6720	6004	10416	9886	10738	6462	11218	10792	10768	10192	10264	11370	12458	10432	8226.67	24236.4	13676.3	7660	9918.67	10914	495822
d__Bacteria	k__unclassified_d__Bacteria	p__Actinomycetota	c__Actinomycetes	o__Streptosporangiales	f__Streptosporangiaceae	g__Sphaerisporangium	2876	2444	2230	3656	2976	3678	3614	3876	3454	3920	3840	3582	4450	3920	3040	2106	1428	2004	2698	2830	4270	5620	2158	1950	4410	4690	4808	3680	5110	5810	11340	10084	9750	11760	12430	9568	2516.67	3621.78	2824.67	3254.33	4751.33	10822	170060
d__Bacteria	k__unclassified_d__Bacteria	p__Pseudomonadota	c__Alphaproteobacteria	o__Rhodobacterales	f__Paracoccaceae	g__Tabrizicola	10412	6328	6712	3170	2788	3440	3180	4210	3176	3410	3266	4010	18052	10670	9578	9322	8964	6556	2766	2032	2016	4504	3540	3306	2110	1976	2388	1488	2472	2426	9896	8294	9436	13930	14460	8794	7817.33	3405.56	10523.7	3027.33	2143.33	10801.7	213078
d__Bacteria	k__unclassified_d__Bacteria	p__Pseudomonadota	c__Gammaproteobacteria	o__Xanthomonadales	f__Rhodanobacteraceae	g__Dokdonella	10588	8088	7890	6346	5626	6500	6906	7650	6260	6814	7926	6766	16212	12046	9758	11950	13936	8662	5876	4740	6106	6516	7274	6228	10872	9652	9644	11698	12356	13660	11692	10764	10996	10730	10174	10446	8855.33	6754.89	12094	6123.33	11313.7	10800.3	329348
d__Bacteria	k__unclassified_d__Bacteria	p__Candidatus_Eremiobacterota	c__unclassified_p__Candidatus_Eremiobacterota	o__unclassified_p__Candidatus_Eremiobacterota	f__unclassified_p__Candidatus_Eremiobacterota	g__unclassified_p__Candidatus_Eremiobacterota	14822	10388	11086	20384	18184	20356	21382	23440	19518	24442	25362	21490	18534	15792	12246	10614	8548	11548	9420	8284	10944	10296	11082	10288	15590	14302	14658	17012	15506	21378	11082	10238	10200	11418	11320	10498	12098.7	21617.6	12880.3	10052.3	16407.7	10792.7	531652
d__Bacteria	k__unclassified_d__Bacteria	p__Pseudomonadota	c__Alphaproteobacteria	o__Hyphomonadales	f__Hyphomonadaceae	g__Hyphomonas	12358	11718	36150	10196	9084	11558	10912	13648	10260	10398	10878	11806	18908	12576	10906	22370	28520	18694	7736	6078	7652	13050	8524	8226	9072	8786	9104	7384	10548	10332	11120	9832	10358	11172	11400	10550	20075.3	10971.1	18662.3	8544.33	9204.33	10738.7	441864
d__Bacteria	k__unclassified_d__Bacteria	p__Actinomycetota	c__Actinomycetes	o__Pseudonocardiales	f__Pseudonocardiaceae	g__Saccharopolyspora	2572	1880	1754	4704	4358	4724	4640	4610	4364	5028	5286	4860	4252	3614	2904	2384	1534	2502	3374	3416	4940	6572	2974	2588	6020	5998	6622	4908	6480	7078	11286	10074	10022	11400	12206	9442	2068.67	4730.44	2865	3977.33	6184.33	10738.3	191370
d__Bacteria	k__unclassified_d__Bacteria	p__Myxococcota	c__unclassified_p__Myxococcota	o__Nannocystales	f__Nannocystaceae	g__Nannocystis	13492	10910	9958	17442	14882	16134	16354	19732	14396	19208	18278	16928	17276	29944	32888	21370	16182	27158	7696	6892	8938	10704	13316	10632	15798	11000	10952	43810	26186	41776	11540	10130	10020	10712	11500	10506	11453.3	17039.3	24136.3	9696.33	24920.3	10734.7	604640
d__Bacteria	k__unclassified_d__Bacteria	p__Bdellovibrionota	c__Bdellovibrionia	o__Bdellovibrionales	f__Pseudobdellovibrionaceae	g__Bdellovibrio	4862	2820	3384	4202	4280	5056	6028	6898	4382	4488	4762	5240	6508	3516	3944	4188	4648	3090	1836	1492	2302	2010	3270	1928	3694	2838	3110	5606	4230	6526	11584	10296	11010	8126	11914	11392	3688.67	5037.33	4315.67	2139.67	4334	10720.3	185460
d__Bacteria	k__unclassified_d__Bacteria	p__Bacteroidota	c__Flavobacteriia	o__Flavobacteriales	f__Flavobacteriaceae	g__Maribacter	28406	13770	22408	4496	3970	5750	5282	6016	5692	4064	4404	4250	12668	8366	6928	12270	19496	7706	9694	8784	8504	15932	6858	5890	15042	13268	14372	16830	17062	20822	11488	10040	10576	10104	11010	10522	21528	4880.44	11239	9277	16232.7	10623.3	392740
d__Bacteria	k__unclassified_d__Bacteria	p__Bacteroidota	c__Flavobacteriia	o__Flavobacteriales	f__Flavobacteriaceae	g__Flavobacterium	17900	12450	57416	38704	29186	41938	61478	96742	79948	47948	53660	109052	138068	30854	52418	56296	44124	18262	7392	6718	6840	12328	6434	5448	16024	14890	15508	27516	20282	26100	10980	10388	10822	10408	10730	10332	29255.3	62072.9	56670.3	7526.67	20053.3	10610	1215584
d__Bacteria	k__unclassified_d__Bacteria	p__Chloroflexota	c__Anaerolineae	o__Anaerolineales	f__Anaerolineaceae	g__Candidatus_Denitrolinea	23042	19988	20338	25292	26546	32254	32426	27358	40954	32116	40102	32686	38072	37062	25770	43136	34826	47608	8568	7834	10798	3632	4784	3020	9108	7698	7458	8502	5486	11798	10284	10644	9932	10998	10898	10904	21122.7	32192.7	37745.7	6439.33	8341.67	10610	731922
d__Bacteria	k__unclassified_d__Bacteria	p__Actinomycetota	c__Actinomycetes	o__Micromonosporales	f__Micromonosporaceae	g__Catellatospora	2522	2156	1850	4478	3648	4550	4084	4546	3974	4776	4792	4414	4458	4614	3044	2302	1412	2400	2702	2898	4068	4880	2386	2046	5382	5244	5440	4004	5446	6516	11212	9810	9618	11612	12294	9038	2176	4362.44	3038.33	3163.33	5338.67	10597.3	178616
d__Bacteria	k__unclassified_d__Bacteria	p__Pseudomonadota	c__Betaproteobacteria	o__Burkholderiales	f__Burkholderiaceae	g__Cupriavidus	29184	17332	20830	11504	10872	11222	11498	13270	9734	11834	12958	11338	30770	18096	15858	9314	8168	6854	4618	3664	5032	5528	6230	6034	9320	9100	9188	7016	7594	9696	11402	10346	10210	11432	10254	9900	22448.7	11581.1	14843.3	5184.33	8652.33	10590.7	407200
d__Bacteria	k__unclassified_d__Bacteria	p__Deinococcota	c__Deinococci	o__Trueperales	f__Trueperaceae	g__Truepera	22230	12236	18498	11136	9844	11922	12082	11650	13344	11660	12762	11088	29636	21914	18164	33788	20482	24926	13818	13630	12610	44026	15596	23148	17504	15606	15900	13640	14388	19458	10816	10058	9768	11074	10674	10904	17654.7	11720.9	24818.3	20471.3	16082.7	10549	589980
d__Bacteria	k__unclassified_d__Bacteria	p__Pseudomonadota	c__Betaproteobacteria	o__Nitrosomonadales	f__Sulfuricellaceae	g__Sulfuricella	11066	7600	8598	12270	11578	10244	10516	10260	8170	12040	12420	9808	12604	9076	7658	6830	7374	6036	3920	3270	3956	4132	6002	4368	9074	9032	9222	6802	6088	8480	10864	10758	10250	11574	9794	9906	9088	10811.8	8263	4274.67	8116.33	10524.3	311640
d__Bacteria	k__unclassified_d__Bacteria	p__Chloroflexota	c__Candidatus_Thermofonsia	o__Phototrophicales	f__Phototrophicaceae	g__Phototrophicus	4968	5046	5024	10516	9832	12606	12244	11420	14818	9886	12396	10924	16998	14336	10848	16614	11272	16364	7922	8986	9814	9004	9312	5230	19446	17764	17390	13358	12162	19050	10372	9848	9814	10960	11074	10900	5012.67	11626.9	14405.3	8378	16528.3	10494.7	418518
d__Bacteria	k__unclassified_d__Bacteria	p__Pseudomonadota	c__Alphaproteobacteria	o__Hyphomicrobiales	f__Parvibaculaceae	g__Parvibaculum	8204	6100	6344	16124	13674	14412	14236	16378	11536	13064	13242	12040	12026	9142	7596	8504	7472	7844	7682	6594	8664	9128	11062	8824	9222	8628	8936	7062	9908	10278	10704	9614	9722	11140	11370	9930	6882.67	13856.2	8764	8659	9005.67	10413.3	366406
d__Bacteria	k__unclassified_d__Bacteria	p__Actinomycetota	c__Actinomycetes	o__Pseudonocardiales	f__Pseudonocardiaceae	g__Actinomycetospora	2696	2198	2116	4768	3936	4694	4864	4930	4326	4824	4868	4756	5104	4240	3928	2974	1832	2596	3968	3770	5598	7086	3502	3190	6868	7154	7848	5446	7638	8314	11042	9034	9554	11326	12032	9260	2336.67	4662.89	3445.67	4519	7211.33	10374.7	202280
d__Bacteria	k__unclassified_d__Bacteria	p__Actinomycetota	c__Actinomycetes	o__Micrococcales	f__Promicromonosporaceae	g__Cellulosimicrobium	758	1000	526	1496	1296	1786	1584	1640	1838	1330	1398	1764	2292	1828	1706	1254	786	1548	2642	2618	3898	4638	1988	1370	4770	4728	4956	3870	5230	5732	10794	9440	9586	11322	12202	8412	761.333	1570.22	1569	2859	4881	10292.7	134026
d__Bacteria	k__unclassified_d__Bacteria	p__Thermomicrobiota	c__Thermomicrobia	o__Sphaerobacterales	f__Sphaerobacteraceae	g__Sphaerobacter	10974	8920	9516	27140	22282	23980	23164	24088	20298	24126	24414	21246	23566	20168	14018	13402	7482	13904	6322	5678	6978	6118	5192	4226	10214	9244	9432	9242	8524	12168	10106	9890	9946	10794	10878	10082	9803.33	23415.3	15423.3	5752.33	9804	10282.7	487722
d__Bacteria	k__unclassified_d__Bacteria	p__Pseudomonadota	c__Betaproteobacteria	o__Burkholderiales	f__Sphaerotilaceae	g__Ideonella	40518	24386	28600	5650	5042	5832	6478	7754	5572	7338	7762	7628	21958	13514	11854	9808	11616	5546	2844	2248	3028	3212	3432	2752	5184	4778	4934	4470	5010	5800	10908	10296	9924	11626	9554	9168	31168	6561.78	12382.7	2919.33	5029.33	10246	336024
d__Bacteria	k__unclassified_d__Bacteria	p__Actinomycetota	c__Thermoleophilia	o__Thermoleophilales	f__Thermoleophilaceae	g__Thermoleophilum	4410	4676	3644	23214	21106	12572	7554	9262	6460	9984	8594	6822	4416	3924	3176	4920	3684	4644	4416	4568	6458	6090	3856	3488	8098	7044	7544	7002	7762	10992	10480	9824	9462	10900	10618	9958	4243.33	11729.8	4127.33	4812.67	8073.67	10207	281622
d__Bacteria	k__unclassified_d__Bacteria	p__Bacteroidota	c__Flavobacteriia	o__Flavobacteriales	f__Flavobacteriaceae	g__Allomuricauda	23242	9944	20322	3380	3666	5154	4018	4792	4172	3152	3544	3660	9832	6348	5238	26602	37138	18196	8874	7444	6698	17108	6548	5526	10450	9102	9988	11594	13486	14688	10576	9612	9792	9736	11102	10066	17836	3948.67	17225.7	8699.67	11551.3	10147.3	374790
d__Bacteria	k__unclassified_d__Bacteria	p__Pseudomonadota	c__Alphaproteobacteria	o__Hyphomicrobiales	f__Hyphomicrobiaceae	g__Rhodoplanes	7538	7182	6216	32866	26860	29816	34230	44200	24570	38964	37960	33000	13488	10984	9008	5828	3746	9934	2858	2442	2986	3258	3916	3102	4670	4290	4636	4292	4904	6116	10390	9654	9412	10584	10388	10078	6978.67	33607.3	8831.33	3093.67	4818	10084.3	484366
d__Bacteria	k__unclassified_d__Bacteria	p__Pseudomonadota	c__Gammaproteobacteria	o__Methylococcales	f__Methylococcaceae	g__Methylococcus	7856	5710	5654	5830	5258	5790	6108	6682	5764	6420	6838	5974	9594	7024	5644	5732	5888	4372	4612	3864	4844	4862	5442	5038	9872	9176	9256	8020	8774	10806	10502	9890	9782	10948	9724	9424	6406.67	6073.78	6375.67	4777	9317.33	10045	256974
d__Bacteria	k__unclassified_d__Bacteria	p__Pseudomonadota	c__Gammaproteobacteria	o__Methylococcales	f__Methylococcaceae	g__Methylobacter	9068	6734	6854	10434	9166	11362	11666	13056	11718	13050	13716	12406	9838	8386	6836	6324	6810	6972	5954	5230	6102	6180	7146	6572	15190	15530	15812	11198	10962	13528	10344	10284	9758	10258	9598	9996	7552	11841.6	7527.67	6197.33	13703.3	10039.7	354038
d__Bacteria	k__unclassified_d__Bacteria	p__Pseudomonadota	c__Gammaproteobacteria	o__Xanthomonadales	f__Xanthomonadaceae	g__Luteimonas	9838	7100	7042	7122	6250	7032	7578	8406	6614	7358	8148	7174	15566	10758	8970	11266	11846	8266	5726	4594	6380	6828	6154	5868	9518	8488	8980	9198	10912	12174	10586	9616	10198	10654	9500	9344	7993.33	7298	11112	5925	9878.33	9983	311052
d__Bacteria	k__unclassified_d__Bacteria	p__Pseudomonadota	c__Gammaproteobacteria	o__Chromatiales	f__Chromatiaceae	g__Nitrosococcus	7944	6018	6430	13822	12172	13602	13776	14652	13376	14342	15380	13558	9216	7562	6492	6570	6440	6670	10898	8964	10896	11236	15018	13590	20644	19812	19844	15770	14562	20550	10488	10272	9850	9900	9084	10172	6797.33	13853.3	7158.33	11767	18530.3	9961	429572
d__Bacteria	k__unclassified_d__Bacteria	p__Candidatus_Kapabacteria	c__unclassified_p__Candidatus_Kapabacteria	o__unclassified_p__Candidatus_Kapabacteria	f__unclassified_p__Candidatus_Kapabacteria	g__unclassified_p__Candidatus_Kapabacteria	7864	4948	6354	5170	4330	5694	5886	6204	5860	6490	7614	6256	8782	7086	5732	10224	19880	6784	14836	12480	17830	27744	13588	7806	14522	11674	11798	22422	19076	21708	11216	11506	12346	8354	7648	8418	6388.67	5944.89	9748	15714	16866.7	9914.67	386130
d__Bacteria	k__unclassified_d__Bacteria	p__Thermodesulfobacteriota	c__Desulfobulbia	o__Desulfobulbales	f__Desulfocapsaceae	g__Desulforhopalus	8384	8212	7748	35384	29942	43844	41268	31728	101940	32356	41488	41172	10698	10540	7660	4702	6210	5020	28172	20914	19620	14192	23154	12836	39434	48544	49680	50358	53754	96110	10098	9758	9712	9536	9014	11042	8114.67	44346.9	7471.67	19814.7	56313.3	9860	984224
d__Bacteria	k__unclassified_d__Bacteria	p__Pseudomonadota	c__Alphaproteobacteria	o__Hyphomicrobiales	f__Stappiaceae	g__Stappia	7410	5922	5732	30974	24956	27844	28504	35328	24170	27138	28082	26916	17436	12042	8864	8226	5698	9972	10046	8256	10944	9816	14822	10536	13192	12582	13470	9066	12742	13752	9904	8592	9084	10560	10828	9812	6354.67	28212.4	10373	10736.7	12467.3	9796.67	533218
d__Bacteria	k__unclassified_d__Bacteria	p__Pseudomonadota	c__Alphaproteobacteria	o__Hyphomicrobiales	f__Rhodovibrionaceae	g__Limibacillus	8730	4614	6292	48394	38378	37018	29626	33366	25430	27176	26974	29938	12818	10324	8806	2790	1432	3842	30276	18132	32566	9016	69250	28116	4096	3752	4170	3720	6842	4976	11152	10454	11322	7372	6754	11592	6545.33	32922.2	6668.67	31226	4592.67	9774.33	629506
d__Bacteria	k__unclassified_d__Bacteria	p__Pseudomonadota	c__Betaproteobacteria	o__Burkholderiales	f__Comamonadaceae	g__Hydrogenophaga	16850	11654	14932	7598	6572	7536	7616	8200	7228	7546	7966	7272	16538	10658	10318	10074	12650	6244	6814	5592	7568	8654	7048	6264	13238	12488	12878	12080	16782	15088	11008	10108	10450	9328	8436	9114	14478.7	7503.78	11080.3	6990	13759	9740.67	360390
d__Bacteria	k__unclassified_d__Bacteria	p__Gemmatimonadota	c__Longimicrobiia	o__Longimicrobiales	f__Longimicrobiaceae	g__Longimicrobium	16564	7504	12578	10054	8378	9600	9852	9718	8512	12382	12784	9728	8050	9404	7682	7930	6460	8370	8856	8222	9788	7890	12262	7248	24718	22796	21930	41106	34572	39872	10520	9552	9560	9482	9558	9728	12215.3	10112	7982.67	9044.33	30832.3	9733.33	473210
d__Archaea	k__unclassified_d__Archaea	p__unclassified_d__Archaea	c__unclassified_d__Archaea	o__unclassified_d__Archaea	f__unclassified_d__Archaea	g__unclassified_d__Archaea	12610	9584	11570	14406	13122	16770	17944	17300	19206	15180	18282	15354	13274	13546	10834	15220	30072	12672	13124	11196	13660	6646	11948	16256	20226	18378	18466	34172	20892	30642	9956	9628	9246	9818	9578	10002	11254.7	16396	15936.3	12138.3	23796	9704.67	550780
d__Bacteria	k__unclassified_d__Bacteria	p__Thermodesulfobacteriota	c__Syntrophobacteria	o__Syntrophobacterales	f__Syntrophobacteraceae	g__Syntrophobacter	10336	8048	9698	6644	6738	9514	11324	11506	12262	11436	13652	10492	7640	7540	5730	4722	5622	6986	23260	16798	17146	5926	10312	4616	13162	11514	11468	17708	10840	20194	9564	9702	8930	9856	9284	10304	9360.67	10396.4	6373.33	13009.7	14147.7	9606.67	380474
d__Bacteria	k__unclassified_d__Bacteria	p__Actinomycetota	c__Thermoleophilia	o__Solirubrobacterales	f__Capillimicrobiaceae	g__Capillimicrobium	2764	2874	2208	17532	16534	10676	8364	9894	6030	12880	11198	9250	5224	4130	3272	3316	2450	3636	3572	3522	5246	5138	3492	3194	5772	5374	5766	5238	6308	7890	9536	9254	8632	10660	10100	9260	2615.33	11373.1	3671.33	4027.33	6058	9573.67	250186
d__Bacteria	k__unclassified_d__Bacteria	p__Actinomycetota	c__Actinomycetes	o__Kitasatosporales	f__Streptomycetaceae	g__Actinacidiphila	1370	1274	952	1856	1790	1652	1448	1594	1460	1728	1642	1544	1670	1488	1176	820	538	912	2148	1888	3256	3726	1368	1108	3162	3054	3516	2720	3604	3976	10166	8636	8744	10292	11184	8060	1198.67	1634.89	1100.67	2249	3338.67	9513.67	115522
d__Bacteria	k__unclassified_d__Bacteria	p__Thermodesulfobacteriota	c__Desulfobulbia	o__Desulfobulbales	f__Desulfobulbaceae	g__Candidatus_Electrothrix	4788	4518	4488	6986	6878	9604	10134	8176	24010	7926	9566	8022	7986	9888	13176	5734	6052	7036	8826	9642	9750	6794	6038	5618	16276	14516	13946	43208	113750	42270	6860	7976	6276	18480	8660	8672	4598	10144.7	8312	7778	40661	9487.33	502526
d__Bacteria	k__unclassified_d__Bacteria	p__Spirochaetota	c__Spirochaetia	o__Spirochaetales	f__Spirochaetaceae	g__Spirochaeta	20588	18994	18538	50172	46704	56126	67224	68420	57204	51866	54422	45810	18880	24668	17702	14490	11798	25580	17606	14464	21644	11656	27322	31286	19968	18064	18586	55772	27042	39610	9536	9102	8876	9670	9926	9706	19373.3	55327.6	18853	20663	29840.3	9469.33	1029022
d__Bacteria	k__unclassified_d__Bacteria	p__Actinomycetota	c__Actinomycetes	o__Mycobacteriales	f__Mycobacteriaceae	g__Mycobacteroides	2764	2784	2388	4040	3616	4542	4162	4924	3796	3944	4210	4628	4210	3146	2902	3174	2616	3132	3056	2770	3786	4376	2618	2034	4190	4212	4474	3468	4874	5650	9256	8460	8634	10416	11444	8436	2645.33	4206.89	3196.67	3106.67	4478	9441	167132
d__Archaea	k__unclassified_d__Archaea	p__Candidatus_Woesearchaeota	c__unclassified_p__Candidatus_Woesearchaeota	o__unclassified_p__Candidatus_Woesearchaeota	f__unclassified_p__Candidatus_Woesearchaeota	g__unclassified_p__Candidatus_Woesearchaeota	12784	9880	10406	18292	16440	19762	20428	21746	18534	18776	19620	16926	17922	17880	13970	16398	26624	13594	10062	9306	10010	7456	12412	11580	16292	14404	14708	25808	19078	25524	9766	9436	8770	9496	9502	9512	11023.3	18947.1	17731.3	10137.7	19302.3	9413.67	543104
d__Bacteria	k__unclassified_d__Bacteria	p__Actinomycetota	c__Actinomycetes	o__Pseudonocardiales	f__Pseudonocardiaceae	g__Actinophytocola	3310	2272	2334	4974	4294	4552	4648	4676	4184	5036	5002	4662	4842	4070	3746	2640	1278	3044	3218	2860	4326	5904	2644	2502	4624	4672	4994	4004	5378	5634	9998	8618	8754	10252	10652	8202	2638.67	4669.78	3270	3575.67	4884.33	9412.67	176800
d__Bacteria	k__unclassified_d__Bacteria	p__Pseudomonadota	c__Alphaproteobacteria	o__Hyphomicrobiales	f__Boseaceae	g__Bosea	6966	5938	5338	16070	13074	14292	14902	18834	12330	14348	14704	13424	21614	15168	11948	9850	8930	8024	6120	5468	6958	6550	7504	6248	8150	7438	7718	6412	8378	9250	9228	8546	8774	10228	10512	9144	6080.67	14664.2	12589	6474.67	7891	9405.33	368380
d__Bacteria	k__unclassified_d__Bacteria	p__Pseudomonadota	c__Gammaproteobacteria	o__Nevskiales	f__Nevskiaceae	g__Nevskia	11802	8406	8696	9162	7994	8494	9142	10958	7664	10336	10698	9186	16042	10222	8870	9748	9102	7170	4928	4110	5068	6494	6124	6112	8376	7594	8130	8184	8742	10598	9862	9164	9162	9886	9230	8982	9634.67	9292.67	10192.3	5472.67	8604	9381	314438
d__Bacteria	k__unclassified_d__Bacteria	p__Pseudomonadota	c__Gammaproteobacteria	o__Xanthomonadales	f__Xanthomonadaceae	g__Pseudoxanthomonas	7750	5712	5744	5712	4744	5680	6088	7112	5476	6066	6360	6020	15464	10484	8596	10728	11798	7408	4762	4068	5282	6002	5236	4590	8450	7926	8204	7852	9772	10412	9834	9380	9314	9986	8900	8864	6402	5917.56	10746.3	4990	8769.33	9379.67	275776
d__Bacteria	k__unclassified_d__Bacteria	p__Cyanobacteriota	c__Cyanophyceae	o__Pleurocapsales	f__Hyellaceae	g__Pleurocapsa	6980	5798	6052	10788	9736	12266	12712	12596	14260	11680	13314	11824	16336	13198	9574	13734	10414	12508	75764	65894	23982	404048	46110	67870	14758	13976	13996	12416	13482	18018	9400	8996	8584	9688	9906	9562	6276.67	12130.7	12627.3	113945	14441	9356	1030220
d__Bacteria	k__unclassified_d__Bacteria	p__Acidobacteriota	c__Blastocatellia	o__unclassified_c__Blastocatellia	f__unclassified_c__Blastocatellia	g__Chloracidobacterium	64628	22582	42918	27100	22356	25374	28932	33752	24458	37678	39686	31718	23304	20128	16014	12642	9906	15908	7916	6370	8624	5564	12882	9648	13432	12078	12368	18970	13996	21934	9194	8984	8906	9460	9730	9850	43376	30117.1	16317	8500.67	15463	9354	698990
d__Bacteria	k__unclassified_d__Bacteria	p__Pseudomonadota	c__Alphaproteobacteria	o__Hyphomicrobiales	f__Parvibaculaceae	g__Rhodoligotrophos	3850	2920	3296	7444	6150	6284	5880	7318	4852	5534	5444	4800	6648	4636	4064	5540	3620	4696	2486	2118	2846	2778	3766	2946	2946	2160	2462	1960	3556	3360	9212	8140	8432	10200	11106	8836	3355.33	5967.33	4867.33	2823.33	2740.67	9321	182286
d__Bacteria	k__unclassified_d__Bacteria	p__Actinomycetota	c__Actinomycetes	o__Micromonosporales	f__Micromonosporaceae	g__Virgisporangium	1698	1540	1288	3610	3148	3624	3598	3714	3104	3604	3574	3510	3764	3044	2574	1810	1064	1568	2222	2110	3060	4424	2180	1792	3690	3894	4110	3154	4198	4600	9970	8544	8678	10120	10472	7832	1508.67	3498.44	2304	2631.33	3941	9269.33	144886
d__Bacteria	k__unclassified_d__Bacteria	p__Pseudomonadota	c__Gammaproteobacteria	o__Cellvibrionales	f__Spongiibacteraceae	g__Spongiibacter	4792	2648	3314	2720	3300	5032	3564	5254	3044	2896	2778	3770	2350	2416	2106	1728	1926	2386	2486	2166	3356	3734	2956	2872	4460	5070	5358	3308	4362	4416	10282	10214	9984	7514	7172	10216	3584.67	3595.33	2152	2928.33	4495.67	9230.33	155950
d__Bacteria	k__unclassified_d__Bacteria	p__Pseudomonadota	c__Gammaproteobacteria	o__Thiotrichales	f__Thiotrichaceae	g__Thiothrix	6134	5152	4862	7474	6404	7738	7810	8074	8246	7574	8262	7500	8176	6502	5586	6112	7092	5286	7316	6284	7098	11816	8648	8782	24112	22530	25342	16962	18180	21116	9594	9296	8838	9832	8298	9202	5382.67	7675.78	6459	8324	21373.7	9176.67	357230
d__Bacteria	k__unclassified_d__Bacteria	p__Bacteroidota	c__Saprospiria	o__Saprospirales	f__Haliscomenobacteraceae	g__Haliscomenobacter	9844	4360	6116	2008	1792	2438	2516	2664	2612	2120	2180	2494	13238	8082	7036	14914	22782	12646	5092	7120	7350	5008	4682	3086	6574	5704	6010	7446	12368	9892	10466	9510	10260	7814	6912	9640	6773.33	2313.78	13116.3	5389.67	7999	9100.33	254776
d__Bacteria	k__unclassified_d__Bacteria	p__Planctomycetota	c__Planctomycetia	o__Pirellulales	f__Pirellulaceae	g__Roseimaritima	3118	3794	2796	9728	7040	8342	8646	12150	8232	7794	8356	8334	15942	12078	9238	13290	11966	8362	7774	7764	10154	12722	8050	6770	10812	9736	10102	11790	14584	16696	8938	7966	8384	9298	10130	9836	3236	8735.78	11812.7	8872.33	12286.7	9092	340712
d__Bacteria	k__unclassified_d__Bacteria	p__Candidatus_Moduliflexota	c__Candidatus_Vecturitrichia	o__Candidatus_Vecturitrichales	f__Candidatus_Vecturitrichaceae	g__Candidatus_Vecturithrix	7608	6756	6844	9408	9182	12250	13022	12540	15356	11792	14334	11792	11336	10448	7620	7516	7338	8212	11442	9564	11228	6024	6188	4598	20024	17050	17810	25246	16714	29302	9010	8736	8394	9424	9352	9456	7069.33	12186.2	8745	8174	21024.3	9062	412916
d__Bacteria	k__unclassified_d__Bacteria	p__Verrucomicrobiota	c__Verrucomicrobiae	o__Verrucomicrobiales	f__Verrucomicrobiaceae	g__Roseibacillus	25858	36106	17482	9164	7392	10782	11454	16056	10140	9908	10274	11136	40814	24540	25566	8368	9438	6202	8304	7722	9748	11554	9500	8400	8916	7406	7778	9492	14732	13860	9230	8186	8796	8810	9460	9390	26482	10700.7	19154.7	9204.67	10364	8978.67	461964
d__Bacteria	k__unclassified_d__Bacteria	p__Pseudomonadota	c__Alphaproteobacteria	o__Hyphomicrobiales	f__Phyllobacteriaceae	g__Salaquimonas	6084	5748	5296	51822	39438	50608	55518	73910	46934	59840	58120	61320	28948	17874	11708	9170	7400	12514	13242	9502	10554	17000	18070	9460	34306	33548	35882	19850	35930	36094	8432	7662	7986	9976	11262	8522	5709.33	55278.9	14602.3	12971.3	32601.7	8973.33	929530
d__Bacteria	k__unclassified_d__Bacteria	p__Candidatus_Schekmanbacteria	c__unclassified_p__Candidatus_Schekmanbacteria	o__unclassified_p__Candidatus_Schekmanbacteria	f__unclassified_p__Candidatus_Schekmanbacteria	g__unclassified_p__Candidatus_Schekmanbacteria	19338	13742	16398	16506	14706	18772	21618	23630	20392	29778	31928	24522	13774	13360	10912	10886	11082	14072	13652	10950	14410	6066	9808	8274	16932	13804	14014	30376	17352	30452	8878	9352	8380	8752	8914	9386	16492.7	22428	12347.7	10526.7	20488.3	8943.67	565168
d__Bacteria	k__unclassified_d__Bacteria	p__Actinomycetota	c__Actinomycetes	o__Propionibacteriales	f__Nocardioidaceae	g__Tenggerimyces	1052	1258	774	1162	1036	1446	1314	1382	1336	1198	1292	1082	1936	1638	1316	964	604	844	2802	2928	3824	4544	2064	1464	4330	4856	4966	3992	5406	5698	9442	7988	7972	9928	10606	7672	1028	1249.78	1217	2937.67	4874.67	8934.67	122116
d__Bacteria	k__unclassified_d__Bacteria	p__Pseudomonadota	c__Betaproteobacteria	o__Burkholderiales	f__unclassified_o__Burkholderiales	g__Rhizobacter	50130	29618	35422	8994	8046	9172	9416	11604	7778	10180	11088	10884	21520	13038	11748	9042	9422	6122	2780	2464	3258	3340	3930	3492	4716	4270	4430	4568	4818	5804	9328	8968	8584	9314	8580	7946	38390	9684.67	11815.3	3210.67	4767.67	8786.67	373814
d__Bacteria	k__unclassified_d__Bacteria	p__Pseudomonadota	c__Alphaproteobacteria	o__Rhodospirillales	f__Rhodospirillaceae	g__Magnetospirillum	7576	6236	5952	20210	17454	17232	16454	18882	12702	14296	14220	12610	12976	10194	8138	7122	5856	7958	7152	5446	7346	6440	12544	9718	7480	7036	7046	7332	7842	9476	9000	8302	8708	9224	9240	8184	6588	16006.7	8707.33	8107.67	7702	8776.33	363584
d__Bacteria	k__unclassified_d__Bacteria	p__Pseudomonadota	c__Betaproteobacteria	o__Burkholderiales	f__Burkholderiaceae	g__Paraburkholderia	16464	10660	11772	14894	12718	13872	14728	16758	12950	14840	15548	13688	18886	13306	10874	7024	5992	6222	5144	4320	5626	6308	6432	6144	11540	11164	11378	9768	9984	12624	9250	8498	8378	9432	8788	8282	12965.3	14444	10384	5662.33	11076.3	8771.33	384256
d__Bacteria	k__unclassified_d__Bacteria	p__Pseudomonadota	c__Gammaproteobacteria	o__Cellvibrionales	f__Halieaceae	g__Candidatus_Litorirhabdus	9916	6786	7356	3676	3210	4172	4166	4820	4646	3844	4106	3534	6728	5154	4332	4502	4910	2886	6430	5344	9474	7392	6070	5212	10130	9944	10314	7276	9938	9260	9782	9310	9224	7522	7028	9174	8019.33	4019.33	4752	6653.67	9477	8673.33	237568
d__Bacteria	k__unclassified_d__Bacteria	p__Pseudomonadota	c__Alphaproteobacteria	o__Rhodobacterales	f__Roseobacteraceae	g__Marivita	9130	5642	6922	3292	2992	3774	3610	4696	3402	3218	3254	3910	9526	5522	4696	6050	5446	4004	15778	11704	9514	34764	12396	11898	11054	9736	11384	7564	12614	12708	9012	7714	8410	8632	9410	8632	7231.33	3572	5874	16009	10843.3	8635	302010
d__Bacteria	k__unclassified_d__Bacteria	p__Planctomycetota	c__Planctomycetia	o__Planctomycetales	f__Planctomycetaceae	g__Maioricimonas	4242	4566	3412	31464	22252	24758	22658	35940	17756	14780	15814	14710	19124	13990	11494	11468	10434	8802	5680	5222	7484	7414	15512	10682	7220	6302	6740	7544	9762	11340	8332	7860	7962	8890	9432	9290	4073.33	22236.9	12552	8665.67	8151.33	8627.67	440332
d__Bacteria	k__unclassified_d__Bacteria	p__Pseudomonadota	c__Alphaproteobacteria	o__Rhodospirillales	f__Thalassospiraceae	g__Magnetovibrio	8016	6354	6150	41058	35170	35168	33470	37076	25722	28688	29310	24042	19452	14368	10090	7282	4530	10620	11274	8520	11488	9608	22898	21374	10708	10100	10532	8960	11054	12748	8680	8018	8572	8678	9080	8624	6840	32189.3	11057	14193.7	10683.7	8608.67	577482
d__Bacteria	k__unclassified_d__Bacteria	p__Pseudomonadota	c__Alphaproteobacteria	o__Rhodospirillales	f__Acetobacteraceae	g__Roseomonas	6800	5280	4890	12920	11336	11878	12228	15214	9520	11468	11542	10832	23080	14542	11666	7394	6210	6196	4828	4188	5522	6310	7034	5870	5994	6106	6312	5790	6780	7920	9232	8074	8340	9182	9044	7716	5656.67	11882	11514.7	5625.33	6483.67	8598	317238
d__Bacteria	k__unclassified_d__Bacteria	p__Pseudomonadota	c__Gammaproteobacteria	o__Oceanospirillales	f__Alcanivoracaceae	g__Ketobacter	6458	5356	5066	39972	101754	196906	88702	116590	59876	50346	25104	157234	15484	12630	8342	11662	7146	131684	6450	5496	7442	6004	7462	7228	11366	11160	11322	8458	9094	11490	8608	8796	8394	8532	7854	8900	5626.67	92942.7	31158	6680.33	10481.7	8514	1194368
d__Bacteria	k__unclassified_d__Bacteria	p__Planctomycetota	c__Planctomycetia	o__Isosphaerales	f__Isosphaeraceae	g__Aquisphaera	4870	4440	3832	8698	6862	7942	8254	10320	7628	9528	9812	8344	15470	11372	8410	7126	6482	5802	3322	3012	4056	4204	3956	3348	6612	6148	5898	7190	7050	9168	8602	7956	8144	8666	8774	8550	4380.67	8598.67	9110.33	3649.67	7011	8448.67	259848
d__Bacteria	k__unclassified_d__Bacteria	p__Pseudomonadota	c__Gammaproteobacteria	o__Chromatiales	f__Chromatiaceae	g__Marichromatium	2244	1842	1830	1284	1062	1284	1146	1294	1366	1116	1254	1110	2190	2088	1818	1782	2104	1184	2572	2086	2502	2810	2236	2096	9126	8768	9378	5016	5398	6108	8630	8266	7700	9798	8294	7660	1972	1212.89	1861	2383.67	7299	8391.33	136442
d__Bacteria	k__unclassified_d__Bacteria	p__Candidatus_Moduliflexota	c__Candidatus_Moduliflexia	o__Candidatus_Moduliflexales	f__Candidatus_Moduliflexaceae	g__Candidatus_Moduliflexus	7526	6920	6898	9468	9218	11416	11806	11204	14622	11102	13308	11170	12132	11018	8548	11412	12198	11152	7794	6942	8782	5088	4432	3570	12114	10914	10610	13422	9462	14762	8420	8342	7716	8828	8330	8582	7114.67	11479.3	11076.7	6101.33	11880.7	8369.67	349228
d__Bacteria	k__unclassified_d__Bacteria	p__Pseudomonadota	c__Alphaproteobacteria	o__Hyphomicrobiales	f__Devosiaceae	g__Devosia	7442	5872	25094	15704	13838	15588	15716	18938	14480	16220	16626	15668	14644	10638	8572	7848	6748	8992	6218	5310	7146	7244	7116	6166	9956	9584	9754	7868	8828	11212	8120	7466	7930	8734	9914	7986	12802.7	15864.2	9573.67	6533.33	9533.67	8358.33	385180
d__Bacteria	k__unclassified_d__Bacteria	p__Pseudomonadota	c__Alphaproteobacteria	o__Rhodobacterales	f__Roseobacteraceae	g__Aliiruegeria	7264	9868	5790	17816	19766	27030	18120	20148	27010	15780	17106	22312	18306	8632	8082	6972	9238	5666	7606	6332	6734	13824	6652	6116	12874	13480	14866	7970	12460	13768	8592	7830	7866	8384	9206	8178	7640.67	20565.3	9482.67	7877.33	12569.7	8342.67	437644
d__Bacteria	k__unclassified_d__Bacteria	p__Pseudomonadota	c__Gammaproteobacteria	o__Cellvibrionales	f__Halieaceae	g__Luminiphilus	16390	12730	11724	6888	6106	7556	7508	8882	7530	6936	7414	6328	11588	8244	7274	9254	9310	5840	13734	10902	13734	20414	14562	15468	19224	20614	21278	15668	22450	20120	9276	8444	8818	7632	7182	8362	13614.7	7238.67	8585	14802.3	19892.3	8285.67	415384
d__Bacteria	k__unclassified_d__Bacteria	p__Pseudomonadota	c__Gammaproteobacteria	o__Cellvibrionales	f__Spongiibacteraceae	g__Sinobacterium	1382	806	938	754	682	802	794	1074	648	620	660	730	620	768	790	504	758	584	582	518	1466	792	628	608	1018	1164	1314	710	1208	1080	9132	9392	8962	6402	6062	9758	1042	751.556	670.667	765.667	1082.33	8284.67	74710
d__Bacteria	k__unclassified_d__Bacteria	p__Myxococcota	c__unclassified_p__Myxococcota	o__Polyangiales	f__Polyangiaceae	g__Polyangium	12598	10988	8520	22200	17132	17938	18074	24548	14896	26024	23152	22186	20838	44090	44776	21754	10314	38770	5728	4992	6576	7634	9466	9292	10606	7940	7734	32816	17758	27262	8462	8184	8146	8154	8854	7904	10702	20683.3	30090.3	7281.33	17352.7	8284	596306
d__Bacteria	k__unclassified_d__Bacteria	p__Actinomycetota	c__Actinomycetes	o__Pseudonocardiales	f__Pseudonocardiaceae	g__Lentzea	2798	2248	2084	3384	2904	3494	3532	3904	3328	4168	3890	3858	3934	3070	2580	2146	1448	2046	3166	3260	4496	6272	2688	2624	5578	5630	5804	4556	5876	6632	8746	7816	7392	8626	9218	7606	2376.67	3606.89	2537.33	3751	5679.33	8234	160802
d__Archaea	k__unclassified_d__Archaea	p__Candidatus_Thermoplasmatota	c__unclassified_p__Candidatus_Thermoplasmatota	o__unclassified_p__Candidatus_Thermoplasmatota	f__unclassified_p__Candidatus_Thermoplasmatota	g__unclassified_p__Candidatus_Thermoplasmatota	9162	7594	8744	7154	6734	8588	9224	8652	10022	8442	9712	8452	10630	11446	8790	10554	8000	11242	9206	7840	9720	4954	4118	3400	11304	10438	10458	14352	8752	14076	8424	8004	7630	8590	8400	8312	8500	8553.33	10110.3	6539.67	11563.3	8226.67	321120
d__Bacteria	k__unclassified_d__Bacteria	p__Actinomycetota	c__Actinomycetes	o__Streptosporangiales	f__Streptosporangiaceae	g__Planotetraspora	1658	1462	1292	1956	1592	2166	2064	2038	2034	2046	2078	2114	2226	1978	1512	1092	562	1128	1572	1708	2580	3122	1532	1214	2860	3018	3302	2370	3156	3410	8624	7682	7980	8748	9162	7146	1470.67	2009.78	1416.33	1954.67	3019.33	8223.67	110184
d__Bacteria	k__unclassified_d__Bacteria	p__Actinomycetota	c__Actinomycetes	o__Micromonosporales	f__Micromonosporaceae	g__Planosporangium	1432	1426	1042	2336	1852	2444	2344	2518	2232	2872	2754	2678	2664	2446	2000	1384	900	1400	2250	2352	3324	4288	1778	1398	3718	3908	4176	3126	4024	4676	8522	7570	7680	9118	9402	7012	1300	2447.78	1799	2565	3938	8217.33	125046
d__Bacteria	k__unclassified_d__Bacteria	p__Pseudomonadota	c__Alphaproteobacteria	o__Rhodobacterales	f__Roseobacteraceae	g__Actibacterium	14146	16376	11116	5450	4750	6200	5602	7268	5550	5922	5562	6676	10470	6086	5054	6138	5520	5182	5788	4050	3790	10726	6516	6258	4130	3994	4506	2672	4922	4778	8696	6918	7404	8862	9748	7602	13879.3	5886.67	6408.33	6188	4167	8205	244428
d__Bacteria	k__unclassified_d__Bacteria	p__Bacteroidota	c__Bacteroidia	o__Marinilabiliales	f__Prolixibacteraceae	g__Maribellus	6116	9726	5304	8770	10218	17146	16336	5502	52774	4948	8382	6346	26396	21604	20022	56118	81498	58544	4266	4006	4098	15940	2914	2436	55432	73062	64052	206340	167682	145470	9366	9178	9172	7534	6822	7076	7048.67	14491.3	44030.3	5610	118673	8191.33	1210596
d__Bacteria	k__unclassified_d__Bacteria	p__Bacteroidota	c__Bacteroidia	o__Marinilabiliales	f__Prolixibacteraceae	g__Mariniphaga	8280	10240	7196	3236	3138	4846	4828	3870	8664	3536	4022	3768	24892	21256	26634	42472	104372	31596	3740	3364	4222	9286	2492	1874	31894	30124	30380	82550	45182	63824	9284	8888	9238	7256	7102	7364	8572	4434.22	41870.3	4163	47325.7	8188.67	674910
d__Bacteria	k__unclassified_d__Bacteria	p__Pseudomonadota	c__Gammaproteobacteria	o__Chromatiales	f__Thioalkalispiraceae	g__Sulfurivermis	6404	5250	5482	3750	3768	3834	4094	3914	5092	4176	5184	4132	9182	12162	17668	11894	23166	28850	3736	3530	3792	3938	6102	4656	7980	7668	8166	5454	5868	6504	8444	8314	7944	8914	7748	7686	5712	4216	17153.7	4292.33	6940	8175	274446
d__Archaea	k__unclassified_d__Archaea	p__Candidatus_Thorarchaeota	c__unclassified_p__Candidatus_Thorarchaeota	o__unclassified_p__Candidatus_Thorarchaeota	f__unclassified_p__Candidatus_Thorarchaeota	g__unclassified_p__Candidatus_Thorarchaeota	9476	7780	8906	7234	6872	8744	9270	9172	10764	8508	10060	8482	9448	9840	6824	7014	7136	6984	13854	11476	12954	5896	6392	4500	19168	13952	13760	96878	23020	54906	7762	7922	7344	8150	8354	9008	8720.67	8789.56	7874.33	9178.67	36947.3	8090	477810
d__Bacteria	k__unclassified_d__Bacteria	p__Pseudomonadota	c__Gammaproteobacteria	o__Chromatiales	f__Ectothiorhodospiraceae	g__Ectothiorhodospira	5784	4224	4162	3310	2834	3462	3424	3914	3470	3296	3542	3172	6750	5336	4902	5788	6188	3896	5886	4802	5684	7710	7632	7250	9578	9054	9152	8046	9128	10034	8390	8428	7696	8564	7586	7822	4723.33	3380.44	5476.67	6494	9165.33	8081	219896
d__Bacteria	k__unclassified_d__Bacteria	p__Bacteroidota	c__Saprospiria	o__Saprospirales	f__Lewinellaceae	g__Flavilitoribacter	8492	4036	5728	2444	1990	2964	2794	3578	3150	2318	2338	3122	12394	7532	5854	26978	17814	52206	6642	8736	7890	7344	8876	5180	8608	8088	8122	8280	15128	12002	9342	8350	8962	6998	5988	8730	6085.33	2744.22	20463	7444.67	10038	8061.67	318998
d__Bacteria	k__unclassified_d__Bacteria	p__Pseudomonadota	c__Alphaproteobacteria	o__Hyphomicrobiales	f__Xanthobacteraceae	g__Pseudolabrys	17076	16064	16914	225724	191474	229450	265410	370000	174272	380606	348620	283544	58472	45428	27230	14066	4968	40386	6408	4772	7336	4788	11836	7808	5224	4868	5254	4262	5522	6938	8074	7434	7282	8716	8544	8146	16684.7	274344	31758.3	7158	5344.67	8032.67	2832916
d__Bacteria	k__unclassified_d__Bacteria	p__Pseudomonadota	c__Gammaproteobacteria	o__Chromatiales	f__Ectothiorhodospiraceae	g__Inmirania	6160	4774	4574	4598	3836	4088	4272	4690	3696	4862	4700	3722	7884	5796	5106	5680	5584	3752	4700	3832	4846	5514	6078	6148	6666	5842	6404	7248	7878	8410	8560	7866	8170	8228	7844	7392	5169.33	4273.78	5633.67	5186.33	7074.67	8010	209400
d__Bacteria	k__unclassified_d__Bacteria	p__Pseudomonadota	c__Betaproteobacteria	o__Burkholderiales	f__Comamonadaceae	g__Polaromonas	26232	16128	17824	11278	10152	10528	11052	12408	8894	13208	13682	10916	15290	10696	8656	7698	7220	6544	3718	3226	3868	3886	6092	5084	6522	6058	6090	8264	7734	9276	8248	8192	7940	8374	7664	7560	20061.3	11346.4	9350.67	4312.33	7324	7996.33	336202
d__Bacteria	k__unclassified_d__Bacteria	p__Pseudomonadota	c__Gammaproteobacteria	o__Methylococcales	f__Methylococcaceae	g__Methylocaldum	5224	4126	4218	6112	5580	6596	6382	6930	5894	6578	7060	5900	7538	6010	5322	4688	4998	3968	4636	4140	5036	5316	6294	5664	8918	8216	8494	7212	7288	9580	8516	7844	7876	8324	7464	7782	4522.67	6336.89	5420.67	5181	8284.67	7967.67	231724
d__Bacteria	k__unclassified_d__Bacteria	p__Myxococcota	c__Myxococcia	o__Myxococcales	f__Myxococcaceae	g__Myxococcus	11548	8910	8358	14876	12110	13730	13816	19008	12068	17402	16910	15284	11736	13942	16684	10536	9712	13780	5314	4520	6050	6018	8080	7746	10310	8482	8170	26264	15672	23350	8246	7338	7746	8126	8596	7496	9605.33	15022.7	12731.7	6288	15374.7	7924.67	417934
d__Bacteria	k__unclassified_d__Bacteria	p__Thermodesulfobacteriota	c__Desulfovibrionia	o__Desulfovibrionales	f__Desulfovibrionaceae	g__Desulfovibrio	7318	6444	6730	8226	7720	9696	10206	10536	11708	10472	11988	9744	8926	8410	7554	7004	8328	6582	9916	7746	8792	5348	6928	5588	15136	13510	13682	19852	14708	23386	8018	7860	7042	8174	8074	8296	6830.67	10032.9	7800.67	7386.33	16712.3	7910.67	349648
d__Bacteria	k__unclassified_d__Bacteria	p__Actinomycetota	c__Rubrobacteria	o__Rubrobacterales	f__Baekduiaceae	g__Baekduia	3122	2734	2316	10440	9936	7056	5876	6886	4500	7870	7338	5912	4268	3336	2596	2698	1574	2498	2660	2316	3538	3636	2726	2360	4122	3558	3984	3286	3790	5452	8154	7268	7410	8562	8396	7482	2724	7312.67	2828.33	2872.67	4032	7878.67	179656
d__Bacteria	k__unclassified_d__Bacteria	p__Pseudomonadota	c__Alphaproteobacteria	o__unclassified_c__Alphaproteobacteria	f__unclassified_c__Alphaproteobacteria	g__Thermopetrobacter	4092	2738	3354	4152	3364	3782	3730	4204	3294	3886	4142	3526	4964	3518	3228	5312	3530	4288	2416	2028	2606	2784	2704	2236	3534	2970	3256	2716	4036	3770	7638	6288	6996	9006	9716	7296	3394.67	3786.67	4140	2462.33	3380.33	7823.33	151100
d__Bacteria	k__unclassified_d__Bacteria	p__Pseudomonadota	c__Alphaproteobacteria	o__Rhodobacterales	f__Roseobacteraceae	g__Maritimibacter	10832	7032	8626	6148	5530	6780	6124	7744	6732	6436	6122	7572	11958	7180	6328	8868	6802	8210	6424	4426	4602	9862	7808	7214	6906	7240	9630	4338	6990	7324	7900	6676	7052	8318	9334	7432	8830	6576.44	8224.33	6722.67	7071.33	7785.33	264500
d__Bacteria	k__unclassified_d__Bacteria	p__Acidobacteriota	c__Terriglobia	o__Bryobacterales	f__Solibacteraceae	g__Candidatus_Solibacter	28046	18864	21822	32776	27582	30724	34918	41062	28570	46098	47396	37630	28722	23586	18342	25374	24322	25798	8330	7034	9184	5852	12448	10908	14070	12850	12878	19286	14828	22462	8052	7496	7774	7574	7728	8006	22910.7	36306.2	24357.3	8959.33	16062.3	7771.67	738392
d__Bacteria	k__unclassified_d__Bacteria	p__Actinomycetota	c__Actinomycetes	o__Mycobacteriales	f__Corynebacteriaceae	g__Corynebacterium	4122	2632	2980	2524	2144	2892	2822	2806	2822	2744	2832	2724	3240	2638	2246	1906	1334	1864	2252	2188	3176	4632	2436	2252	3556	3740	4094	3246	4070	4946	7922	7192	7230	8062	9010	7122	3244.67	2701.11	2204.67	2822.67	3942	7756.33	134398
d__Bacteria	k__unclassified_d__Bacteria	p__Pseudomonadota	c__Alphaproteobacteria	o__Rhodospirillales	f__Geminicoccaceae	g__Geminicoccus	1678	1860	1498	31304	26356	26064	22710	28800	16850	12894	13036	12450	11668	12086	8732	5128	3954	8126	8384	6774	11196	4488	13428	8198	9530	8666	9602	8858	11180	11726	8552	7482	7688	7794	7678	7314	1678.67	21162.7	8282.33	8744.67	9927	7751.33	403732
d__Bacteria	k__unclassified_d__Bacteria	p__Chloroflexota	c__Candidatus_Limnocylindria	o__unclassified_c__Candidatus_Limnocylindria	f__unclassified_c__Candidatus_Limnocylindria	g__Candidatus_Aquidulcis	11424	10094	8454	9882	7686	10438	10836	10162	11714	15008	15828	15810	13718	10752	8468	5810	3376	5048	5992	6044	6330	9058	3954	4174	13090	12878	13642	10256	13202	15986	8220	7180	7076	7934	8360	7590	9990.67	11929.3	7862	5925.33	13175.7	7726.67	345474
d__Bacteria	k__unclassified_d__Bacteria	p__Actinomycetota	c__Actinomycetes	o__Catenulisporales	f__Actinospicaceae	g__Actinospica	1440	1144	1036	870	758	984	1030	1014	1054	1014	978	920	1440	1320	934	706	602	660	1524	1554	2474	2824	982	788	2556	2520	2638	2326	2694	3286	8478	7144	6962	8262	9038	6474	1206.67	958	943.667	1691	2670	7726.33	90428
d__Bacteria	k__unclassified_d__Bacteria	p__Actinomycetota	c__Actinomycetes	o__Kineosporiales	f__Kineosporiaceae	g__Pseudokineococcus	572	680	476	728	592	722	716	726	708	590	484	614	1214	972	830	430	314	458	1444	1446	2228	2980	896	722	2382	2202	2436	1760	2366	2680	7994	6778	7024	8560	9040	6732	576	653.333	703	1619.33	2304.33	7688	81496
d__Bacteria	k__unclassified_d__Bacteria	p__Pseudomonadota	c__Alphaproteobacteria	o__Rhodospirillales	f__Rhodospirillaceae	g__Inquilinus	8808	6178	6762	27506	23756	23076	21662	25842	16140	17274	17120	15964	15282	11936	8730	7238	5508	7904	8188	6110	9008	9380	17186	14022	8258	7614	7902	7038	8768	10022	8178	7264	7606	7808	7654	7584	7249.33	20926.7	9433	10649	8267	7682.33	426276
d__Bacteria	k__unclassified_d__Bacteria	p__Pseudomonadota	c__Betaproteobacteria	o__Burkholderiales	f__Oxalobacteraceae	g__Massilia	17904	11828	12668	7674	6796	7886	7972	9328	6698	8318	8960	7932	22564	13620	12242	7762	7262	5394	3352	2864	3592	5326	4630	4524	6194	5848	5982	6280	6422	7346	8064	7544	7408	8052	7650	7300	14133.3	7951.56	11474	4048	6345.33	7669.67	291186
d__Bacteria	k__unclassified_d__Bacteria	p__Pseudomonadota	c__Alphaproteobacteria	o__Hyphomicrobiales	f__Notoacmeibacteraceae	g__Notoacmeibacter	7122	4862	5428	11148	9098	10638	11594	14790	10134	11892	11464	12268	10066	6580	5406	25112	21800	22502	4866	3286	4164	4992	10608	4508	6080	5618	6226	3766	6528	6848	7346	6020	6736	9130	9694	7054	5804	11447.3	15244.3	5404	5844.33	7663.33	325374
d__Bacteria	k__unclassified_d__Bacteria	p__Pseudomonadota	c__Gammaproteobacteria	o__Chromatiales	f__Chromatiaceae	g__Thiobaca	1356	1068	1168	870	812	980	1194	1116	1034	1090	1054	998	1326	1156	958	1010	1334	894	1328	1232	1392	1136	1236	990	6696	6586	6988	3392	3192	3944	7640	7262	6918	8736	7844	7484	1197.33	1016.44	1113	1219	5133	7647.33	103414
d__Bacteria	k__unclassified_d__Bacteria	p__Actinomycetota	c__Actinomycetes	o__Micromonosporales	f__Micromonosporaceae	g__Hamadaea	1294	1218	1000	2236	1862	2162	2198	2342	1998	2706	2376	2542	2436	2106	1692	1282	652	1280	1936	1804	2750	3390	1272	1026	3526	3444	3574	2632	3330	3994	7918	6848	7292	8332	8916	6458	1170.67	2269.11	1574.67	2029.67	3416.67	7627.33	111824
d__Bacteria	k__unclassified_d__Bacteria	p__Pseudomonadota	c__Gammaproteobacteria	o__Chromatiales	f__Sedimenticolaceae	g__Candidatus_Endoriftia	3768	3228	3194	1506	1426	1516	1652	1724	1852	1724	1828	1636	2974	2796	2562	2780	3878	1772	2774	2238	2546	3786	2898	2626	9082	8670	9838	6106	6312	7308	7944	7538	6944	8544	7656	7012	3396.67	1651.56	2793.67	2811.33	7886	7606.33	151638
d__Bacteria	k__unclassified_d__Bacteria	p__Pseudomonadota	c__Gammaproteobacteria	o__Cellvibrionales	f__Cellvibrionaceae	g__Pseudomaricurvus	10006	7624	7290	8238	10036	15050	11122	16722	9476	7370	8070	9524	6664	5182	4726	4902	5014	6052	8382	6860	9668	13454	9104	9108	16436	18758	18656	12350	16166	15450	8644	8266	8174	6244	6174	8128	8306.67	10623.1	5423.33	9429.33	16302.7	7605	353090
d__Bacteria	k__unclassified_d__Bacteria	p__Pseudomonadota	c__Gammaproteobacteria	o__Oceanospirillales	f__Alcanivoracaceae	g__Alcanivorax	7482	5380	5744	8064	7888	10296	9194	10718	7302	7284	7004	8326	7998	6378	5816	6164	6604	6888	6838	5776	7260	9058	9076	9200	9878	9410	9782	8320	10354	10552	8062	7896	7872	7010	6964	7790	6202	8452.89	6641.33	7868	9716	7599	285628
d__Bacteria	k__unclassified_d__Bacteria	p__Planctomycetota	c__Planctomycetia	o__Pirellulales	f__Lacipirellulaceae	g__Lacipirellula	2702	3398	3480	58830	43808	45838	43104	58056	35654	41824	43836	39132	21806	14830	10720	10562	8038	9908	3172	3000	4358	4022	3904	3604	6228	5584	5818	5612	7000	9124	7576	6822	7354	7824	7910	8050	3193.33	45564.7	12644	3676.67	6561	7589.33	602488
d__Archaea	k__unclassified_d__Archaea	p__Candidatus_Heimdallarchaeota	c__unclassified_p__Candidatus_Heimdallarchaeota	o__unclassified_p__Candidatus_Heimdallarchaeota	f__unclassified_p__Candidatus_Heimdallarchaeota	g__unclassified_p__Candidatus_Heimdallarchaeota	10546	8074	9376	10644	10262	13936	13964	14158	16416	13390	15442	13556	11766	11216	8074	9114	10828	9500	9724	8224	10718	6048	6874	4502	15254	12296	12722	25724	13186	22770	7358	7756	7130	7394	7596	8116	9332	13529.8	10083	7681.67	16992	7558.33	403654
d__Bacteria	k__unclassified_d__Bacteria	p__Candidatus_Aerophobetes	c__unclassified_p__Candidatus_Aerophobetes	o__unclassified_p__Candidatus_Aerophobetes	f__unclassified_p__Candidatus_Aerophobetes	g__unclassified_p__Candidatus_Aerophobetes	10586	8660	9478	7708	7308	10596	11434	11290	12482	11510	13486	11040	9022	9278	6538	7052	6196	8474	10786	8862	11748	4444	4346	3226	13006	10706	11030	18880	10324	21852	7324	7566	6750	7618	7560	8366	9574.67	10761.6	7760	7235.33	14299.7	7530.67	346532
d__Archaea	k__unclassified_d__Archaea	p__Euryarchaeota	c__Methanomicrobia	o__Methanosarcinales	f__Methanosarcinaceae	g__unclassified_f__Methanosarcinaceae	10246	7766	9690	8622	8070	12294	13860	13566	15454	9750	11950	10188	21974	18976	12416	45418	78104	30682	14044	11294	13234	5520	6656	4370	17830	16140	16404	24564	14306	28824	7328	7424	6804	7808	7610	8096	9234	11528.2	34595	9186.33	19678	7511.67	557282
d__Bacteria	k__unclassified_d__Bacteria	p__Pseudomonadota	c__Gammaproteobacteria	o__unclassified_c__Gammaproteobacteria	f__unclassified_c__Gammaproteobacteria	g__Candidatus_Kentron	6312	5016	4828	7430	6456	7240	7902	7964	7726	7366	8106	7000	6316	5460	5708	4578	4742	4048	8016	6592	8428	7618	11540	16020	14444	13214	13700	11506	11990	14272	7878	7450	7308	7532	7292	7336	5385.33	7465.56	5142	9702.33	13187.7	7466	296334
d__Bacteria	k__unclassified_d__Bacteria	p__Pseudomonadota	c__Betaproteobacteria	o__Burkholderiales	f__Oxalobacteraceae	g__Noviherbaspirillum	31470	17116	21342	7914	7308	7556	7822	8882	6436	8314	8946	7822	30910	18110	15934	7004	5232	4706	2854	2362	2850	3536	3640	3440	4888	4522	4702	4070	4258	5304	7762	7730	7498	7894	6916	6980	23309.3	7888.89	13649.3	3113.67	4624	7463.33	314030
d__Bacteria	k__unclassified_d__Bacteria	p__Actinomycetota	c__Actinomycetes	o__Micrococcales	f__Microbacteriaceae	g__Leifsonia	2258	2084	1794	2978	2638	3630	3648	3422	3662	3470	3560	3556	3668	2866	2278	2046	1216	2134	2472	2290	3554	3584	1940	1568	4888	5016	5102	3992	4458	5530	7846	6992	6888	8040	8484	6516	2045.33	3396	2368	2568	4831	7461	140068
d__Bacteria	k__unclassified_d__Bacteria	p__Actinomycetota	c__Actinomycetes	o__Micrococcales	f__Dermatophilaceae	g__Austwickia	752	758	498	986	774	982	1036	1060	1184	1040	984	1162	1590	1104	984	1652	1086	1332	1394	1518	2220	2610	1062	764	3034	3254	3620	2550	3434	3928	7926	6750	6670	8158	8964	6218	669.333	1023.11	1291.33	1594.67	3303.33	7447.67	93038
d__Bacteria	k__unclassified_d__Bacteria	p__Actinomycetota	c__Actinomycetes	o__Streptosporangiales	f__Streptosporangiaceae	g__Planomonospora	834	994	682	1666	1438	1728	1476	1624	1438	1726	1622	1552	1826	1402	1042	828	574	892	1448	1590	2564	3240	1236	1112	2404	2346	2456	1844	2612	2802	7920	6830	6774	8056	8720	6306	836.667	1585.56	1094	1865	2410.67	7434.33	93604
d__Bacteria	k__unclassified_d__Bacteria	p__Actinomycetota	c__Actinomycetes	o__Streptosporangiales	f__Nocardiopsaceae	g__Thermobifida	1660	1622	1194	1358	1164	1322	1346	1570	1418	1546	1480	1410	1996	1658	1368	1006	660	994	2020	1976	3164	3420	1684	1236	3144	3190	3400	2626	3554	3840	7808	6828	6716	8210	8576	6362	1492	1401.56	1280.33	2250	3292.33	7416.67	102526
d__Bacteria	k__unclassified_d__Bacteria	p__Actinomycetota	c__Thermoleophilia	o__Solirubrobacterales	f__Paraconexibacteraceae	g__Paraconexibacter	2114	1862	1536	9346	8796	5126	3044	3850	2630	4248	3720	2966	2806	2252	1762	1980	1494	1684	2446	2406	3382	3600	2078	1718	4334	3826	4272	3822	4546	5668	7788	7066	6612	8116	7928	6484	1837.33	4858.44	1996.33	2605	4411.33	7332.33	147308
d__Bacteria	k__unclassified_d__Bacteria	p__Actinomycetota	c__Actinomycetes	o__Micrococcales	f__Intrasporangiaceae	g__Arsenicicoccus	758	848	506	868	748	1016	832	888	942	926	854	1024	1362	1042	810	956	602	992	1494	1486	2280	2604	1156	750	3012	2978	3188	2220	3194	3634	7848	6612	6534	7888	8718	6250	704	899.778	960.667	1628.33	3037.67	7308.33	87820
d__Bacteria	k__unclassified_d__Bacteria	p__Actinomycetota	c__Coriobacteriia	o__Anaerosomatales	f__Anaerosomataceae	g__Parvivirga	4832	4376	4208	1792	1574	2542	2936	2452	3770	3010	3630	2992	8184	6612	5160	15400	10270	13420	12230	7774	8288	9176	2980	1936	2960	2416	2706	2628	2392	3650	7924	7930	6978	7050	6620	7152	4472	2744.22	9841	7064	2792	7275.67	199950
d__Bacteria	k__unclassified_d__Bacteria	p__Planctomycetota	c__Planctomycetia	o__Planctomycetales	f__Planctomycetaceae	g__Rubinisphaera	3084	3448	2712	10974	7794	9512	9186	12770	8206	8030	8734	8106	11734	8290	6716	11364	10126	7568	5146	5140	6710	6900	6958	5740	7468	6502	6984	7770	9592	11018	7204	6564	6638	7040	8072	7926	3081.33	9256.89	9299.67	6099	8222.33	7240.67	277726
d__Bacteria	k__unclassified_d__Bacteria	p__Candidatus_Riflebacteria	c__unclassified_p__Candidatus_Riflebacteria	o__unclassified_p__Candidatus_Riflebacteria	f__unclassified_p__Candidatus_Riflebacteria	g__unclassified_p__Candidatus_Riflebacteria	11330	7444	9046	7044	6220	7940	8648	9382	8988	10206	11700	9492	10520	9596	8138	9060	9726	8282	5258	4550	5792	3562	5132	3746	11324	9026	9142	24262	13548	23026	7168	7050	6718	7576	7616	7280	9273.33	8846.67	9220.33	4673.33	15054.7	7234.67	324538
d__Bacteria	k__unclassified_d__Bacteria	p__Pseudomonadota	c__Alphaproteobacteria	o__Rhodobacterales	f__Roseobacteraceae	g__Roseibacterium	4758	3258	3534	2276	2120	2632	2574	3030	2550	2454	2388	2886	9468	5578	5064	5454	5614	3224	10364	7956	5240	16562	8486	8370	4372	3988	4632	3196	6164	5398	7548	5812	6522	8230	8702	6584	3850	2545.56	5733.67	9496.33	4625	7233	196988
d__Bacteria	k__unclassified_d__Bacteria	p__Pseudomonadota	c__Gammaproteobacteria	o__Chromatiales	f__Chromatiaceae	g__Imhoffiella	1716	1238	1210	968	732	1036	1008	1046	1204	1094	1238	1128	1694	1428	1106	1140	1358	810	1996	1714	1770	1692	1524	1344	8322	8220	8164	4454	4492	5404	7428	6574	6412	8504	7382	7030	1388	1050.44	1256	1673.33	6509.33	7221.67	113580
d__Bacteria	k__unclassified_d__Bacteria	p__Pseudomonadota	c__Gammaproteobacteria	o__Acidiferrobacterales	f__Acidiferrobacteraceae	g__Sulfuricaulis	12390	9326	10010	21070	20630	18636	18478	17316	13518	26354	27322	20502	10594	8118	6896	6154	5856	6236	7838	6444	8352	6450	29718	16136	17304	17994	18490	8548	9210	11170	7748	7538	7128	7046	6504	7308	10575.3	20425.1	7309	12489.7	13786	7212	460332
d__Bacteria	k__unclassified_d__Bacteria	p__Pseudomonadota	c__Gammaproteobacteria	o__Cellvibrionales	f__Porticoccaceae	g__Porticoccus	7768	5592	5906	5136	4774	6348	5738	6834	5264	4762	5272	5096	5226	4298	3688	3462	3852	3422	5554	4270	6390	5218	5778	5224	9198	9452	9496	6608	8126	8450	7858	8218	7856	5818	5570	7730	6422	5469.33	3991.33	5405.67	8555	7175	219252
d__Bacteria	k__unclassified_d__Bacteria	p__Deinococcota	c__Deinococci	o__Thermales	f__Thermaceae	g__Meiothermus	6300	4664	5060	7114	6182	7614	7748	7750	8238	7548	8384	7432	10644	9208	7004	7996	6254	6656	5038	4838	5988	7522	3942	3872	8610	8276	8262	7494	6822	9562	6898	6890	6670	7622	7756	7096	5341.33	7556.67	7960.33	5200	8171	7155.33	254954
d__Bacteria	k__unclassified_d__Bacteria	p__Actinomycetota	c__Thermoleophilia	o__Solirubrobacterales	f__Patulibacteraceae	g__Patulibacter	2192	1968	1834	8536	8082	5306	3670	4198	2798	4196	4066	3274	2698	2446	1862	2070	1656	1904	2560	2574	3606	4070	2344	1938	4310	3888	4190	3900	4358	5928	7208	6846	6580	7646	7836	6678	1998	4902.89	2106	2848.67	4429	7132.33	149216
d__Bacteria	k__unclassified_d__Bacteria	p__Pseudomonadota	c__Gammaproteobacteria	o__Thiotrichales	f__Piscirickettsiaceae	g__Methylophaga	7814	6122	6512	7818	7866	8840	8094	9044	7338	6326	6754	7028	9640	6862	7242	9386	6944	8188	7226	5882	7326	7766	11560	9862	12694	12708	13372	9290	10150	11502	8140	7354	7522	6498	5818	7426	6816	7678.67	8043.67	8270.33	11619.3	7126.33	299914
d__Bacteria	k__unclassified_d__Bacteria	p__Pseudomonadota	c__Gammaproteobacteria	o__unclassified_c__Gammaproteobacteria	f__Candidatus_Competibacteraceae	g__Plasticicumulans	6380	4794	4614	3720	3162	3552	3508	4304	3426	3502	3846	3474	6796	4968	4192	4542	4726	2940	7372	6440	7902	13212	10714	9424	11042	10012	9852	8832	9090	12442	7402	7128	6714	7780	6786	6872	5262.67	3610.44	4694	9177.33	10211.7	7113.67	235462
d__Bacteria	k__unclassified_d__Bacteria	p__Pseudomonadota	c__Alphaproteobacteria	o__Rhodobacterales	f__Roseobacteraceae	g__Seohaeicola	6082	7378	4636	3064	2960	4114	3354	4554	4114	3558	3084	4622	10594	5800	4496	22080	31550	20064	3572	2528	2798	5238	3356	3086	3562	3312	3630	2240	3610	3490	7448	5822	6526	7330	8366	6616	6032	3713.78	15764	3429.67	3307.33	7018	228634
d__Bacteria	k__unclassified_d__Bacteria	p__Bacteroidota	c__Flavobacteriia	o__Flavobacteriales	f__Flavobacteriaceae	g__Lutibacter	16770	105218	14356	2082	2026	2660	2744	2974	3558	2092	1988	2624	7778	5214	4268	43652	170724	47992	4128	3692	4000	6130	2336	2006	9146	8760	9754	11382	10114	12576	7522	6454	7028	6374	7638	7000	45448	2527.56	46604.7	3715.33	10288.7	7002.67	564760
d__Bacteria	k__unclassified_d__Bacteria	p__Pseudomonadota	c__Betaproteobacteria	o__Nitrosomonadales	f__Gallionellaceae	g__Gallionella	9546	7218	8614	11432	10734	10696	10926	10954	10076	11334	12352	10504	13076	13276	8702	11758	28414	8856	3752	3246	4086	3654	6026	4080	7290	7328	7132	5788	5548	7282	7156	6900	6846	7786	6462	6620	8459.33	11000.9	14013.7	4140.67	6728	6961.67	315450
d__Bacteria	k__unclassified_d__Bacteria	p__Actinomycetota	c__Actinomycetes	o__Micromonosporales	f__Micromonosporaceae	g__Phytohabitans	2614	1974	1970	6000	5476	6264	5044	5440	4608	6744	6340	6198	4240	4036	2996	2496	1382	2666	2332	2086	2960	4158	2094	1830	3502	3440	3884	2888	3716	4168	7416	6270	6354	7644	7866	6064	2186	5790.44	2969.33	2576.67	3599.67	6935.67	155160
d__Bacteria	k__unclassified_d__Bacteria	p__Pseudomonadota	c__Alphaproteobacteria	o__Hyphomicrobiales	f__Hyphomicrobiaceae	g__Rhodomicrobium	3886	4228	3174	27110	21720	23250	23600	28198	20114	22196	22174	20138	16456	11112	7608	9494	6364	10006	7146	6132	7576	8042	7734	6548	8232	7896	8096	6172	8482	9764	6780	6412	6498	7074	7866	6952	3762.67	23166.7	10173.3	7196.33	8107	6930.33	414230
d__Bacteria	k__unclassified_d__Bacteria	p__Pseudomonadota	c__Betaproteobacteria	o__Burkholderiales	f__unclassified_o__Burkholderiales	g__Aquabacterium	23980	14894	16982	5348	4712	5534	5722	7428	4952	6154	5948	7010	14306	8958	7834	8834	10136	4924	2188	1926	2444	3102	3054	2992	4192	3704	4030	3898	4328	5012	7278	6800	6744	7598	6774	6296	18618.7	5867.56	9165.33	2617.67	4194	6915	246016
d__Bacteria	k__unclassified_d__Bacteria	p__Pseudomonadota	c__Gammaproteobacteria	o__Xanthomonadales	f__Rhodanobacteraceae	g__Rhodanobacter	7598	5402	5608	5392	4582	5560	5958	6450	5114	6404	6464	5778	11488	8686	6648	8122	8218	5706	3338	2664	3632	4962	7196	4044	5858	5352	5308	7086	7246	8144	7448	6936	6950	6980	6374	6750	6202.67	5744.67	8144.67	4306	6499	6906.33	225446
d__Bacteria	k__unclassified_d__Bacteria	p__Pseudomonadota	c__Alphaproteobacteria	o__Hyphomicrobiales	f__unclassified_o__Hyphomicrobiales	g__Pseudorhodoplanes	8298	8238	6638	39994	32688	36432	40592	52348	29568	46758	45760	39278	17530	14032	10892	7516	4888	12790	3490	2890	3750	3184	5406	4204	3552	3442	3662	2968	3872	4406	6978	6472	6366	7408	7390	6770	7724.67	40379.8	11274.7	3820.67	3650.33	6897.33	540450
d__Bacteria	k__unclassified_d__Bacteria	p__Actinomycetota	c__Actinomycetes	o__Micrococcales	f__Micrococcaceae	g__Kocuria	948	870	780	1398	1246	1578	1508	1490	1570	1574	1698	1626	1742	1544	1182	1524	1104	1704	1786	1614	2424	3220	1338	1010	2712	2938	3114	2474	3258	3592	7186	6156	6232	7606	8160	5934	866	1520.89	1466.67	1898.67	3014.67	6879	95840
d__Archaea	k__unclassified_d__Archaea	p__Euryarchaeota	c__Methanomicrobia	o__Methanosarcinales	f__Candidatus_Methanoperedenaceae	g__Candidatus_Methanoperedens	9894	7510	8512	9354	8522	10996	11660	11958	13090	12048	13412	11738	12490	11422	8108	8756	7806	9122	6616	5704	7210	4272	3782	2914	8330	7386	7736	8446	6096	10556	6756	6670	6426	7106	7188	6894	8638.67	11419.8	9617.33	5083	8091.67	6840	306486
d__Bacteria	k__unclassified_d__Bacteria	p__Planctomycetota	c__Planctomycetia	o__Pirellulales	f__Pirellulaceae	g__Rosistilla	2260	2598	1836	7482	5218	6760	6456	8850	6032	6280	6616	6286	12360	9242	6556	8522	8046	5840	4966	4864	6648	8392	5048	4456	7954	7110	7834	8468	10122	12198	6904	6030	6120	7112	7484	7236	2231.33	6664.44	8427.67	5729	8947.67	6814.33	246186
d__Bacteria	k__unclassified_d__Bacteria	p__Actinomycetota	c__Nitriliruptoria	o__Egicoccales	f__Egicoccaceae	g__Egicoccus	14882	7070	10940	6252	5328	5844	6124	6518	5648	6546	6502	5300	7808	6392	6144	3202	1030	3146	8196	5996	5154	15448	11702	13424	4254	3928	4388	3300	4694	4684	7172	6414	6258	7016	7464	6440	10964	6006.89	4620.33	9986.67	4208	6794	240608
d__Bacteria	k__unclassified_d__Bacteria	p__Chloroflexota	c__Candidatus_Limnocylindria	o__Candidatus_Limnocylindrales	f__Candidatus_Limnocylindraceae	g__Candidatus_Limnocylindrus	10054	8672	7636	7928	6406	8584	8994	8826	10296	12756	13888	13584	12396	9428	7352	5382	3052	4486	5090	5066	5574	8090	3424	3408	11564	10696	11524	8992	11386	13904	7094	6254	6322	7062	7216	6744	8787.33	10140.2	7016	5108.67	11344.3	6782	299130
d__Bacteria	k__unclassified_d__Bacteria	p__Pseudomonadota	c__Betaproteobacteria	o__Rhodocyclales	f__Rhodocyclaceae	g__Propionivibrio	7810	6152	5688	5364	4688	5172	5440	6142	4980	5750	6384	5360	7534	5130	4198	3798	3876	3028	2434	2132	2768	2566	2648	2280	5280	5330	5552	3958	4126	5120	7102	6532	6482	7424	6700	6422	6550	5475.56	4594	2471.33	4894.33	6777	181350
d__Bacteria	k__unclassified_d__Bacteria	p__Pseudomonadota	c__Alphaproteobacteria	o__Hyphomicrobiales	f__Tepidamorphaceae	g__Microbaculum	4960	4098	4058	22446	19636	20734	21680	26048	18690	22698	24030	23706	13738	12584	9126	12322	5982	22198	4082	3258	4468	4176	6596	5004	4816	5000	5268	3784	5828	6170	6668	5898	6166	7266	7502	6718	4372	22185.3	12658.3	4597.33	5144.33	6703	387402
d__Bacteria	k__unclassified_d__Bacteria	p__Pseudomonadota	c__Alphaproteobacteria	o__Rhodobacterales	f__Paracoccaceae	g__Gemmobacter	7494	4428	5090	2028	1814	2100	1952	2744	2252	2436	2290	3020	11716	6842	6344	7632	7950	5174	2342	1572	1640	3562	2488	2442	1820	1698	1964	1330	2138	2046	6020	5202	5490	8942	9064	5406	5670.67	2292.89	7609.67	2341	1832.67	6687.33	148472
d__Bacteria	k__unclassified_d__Bacteria	p__Actinomycetota	c__Actinomycetes	o__Pseudonocardiales	f__Pseudonocardiaceae	g__Saccharomonospora	2286	1542	1584	2814	2422	2678	2764	2870	2468	2764	2754	2520	2480	1956	1648	1402	624	1890	1542	1592	2368	3352	1596	1492	2602	2536	2894	2130	2758	3238	7214	6024	6144	7410	7712	5602	1804	2672.67	1666.67	1990.33	2693	6684.33	107672
d__Bacteria	k__unclassified_d__Bacteria	p__Planctomycetota	c__Candidatus_Brocadiia	o__Candidatus_Brocadiales	f__Candidatus_Scalinduaceae	g__Candidatus_Scalindua	9250	7526	8592	10016	9080	11488	12126	12848	12662	12598	13832	11414	7976	7564	6310	6236	7544	6884	12124	9818	11126	5760	8076	7068	14944	13708	13616	17892	12872	20948	6502	6740	6366	6614	6592	7172	8456	11784.9	7085.67	8995.33	15663.3	6664.33	361884
d__Bacteria	k__unclassified_d__Bacteria	p__Chloroflexota	c__Ktedonobacteria	o__Ktedonobacterales	f__Dictyobacteraceae	g__Dictyobacter	6006	4810	4764	8172	7162	9070	9382	9016	9952	9024	10374	8954	10348	9042	6658	7526	5690	6976	4052	4050	5046	4254	2530	2562	8316	7830	7350	6650	5680	8972	6628	6462	6302	6828	6898	6708	5193.33	9011.78	7706.67	3749	7466.33	6637.67	250044
d__Bacteria	k__unclassified_d__Bacteria	p__Myxococcota	c__Myxococcia	o__Myxococcales	f__unclassified_o__Myxococcales	g__Enhygromyxa	9348	8326	9624	19608	20698	17080	12758	13054	12668	15852	14006	15070	23156	138312	88312	62702	16828	124810	4156	3556	4794	5700	9764	6564	6660	5066	5308	15214	10108	14658	6722	6428	6102	7008	7304	6168	9099.33	15643.8	75686.7	5755.67	9502.33	6622	753492
d__Bacteria	k__unclassified_d__Bacteria	p__Bacteroidota	c__Bacteroidia	o__Bacteroidales	f__Lentimicrobiaceae	g__Lentimicrobium	4334	5132	3772	1886	1774	2430	1952	1920	2270	1798	1844	1864	9480	6164	5820	28664	85516	12112	4000	4048	3406	4338	3520	1942	34168	26830	28168	70278	65994	68918	7490	7046	6784	6482	5592	6252	4412.67	1970.89	24626	3542.33	49059.3	6607.67	533988
d__Bacteria	k__unclassified_d__Bacteria	p__Rhodothermota	c__Rhodothermia	o__Rhodothermales	f__Rhodothermaceae	g__Rhodocaloribacter	7880	4998	5882	10126	8946	9366	10092	10322	9148	11038	12036	9414	10600	10014	8042	8444	7862	7636	8572	6770	7950	10704	11940	11474	15948	13832	13812	17622	18612	21104	7002	6364	6550	6422	6528	6506	6253.33	10054.2	8766.33	9568.33	16821.7	6562	359558
d__Bacteria	k__unclassified_d__Bacteria	p__Chloroflexota	c__Chloroflexia	o__Kallotenuales	f__Kallotenuaceae	g__Kallotenue	6400	4986	4940	8102	7322	9204	9464	9460	10420	9486	11130	9470	12432	11194	7978	9012	6392	8278	5036	4658	5826	4366	2884	2702	8698	8184	7850	6886	5950	9672	6550	6100	6148	7050	7088	6416	5442	9339.78	9214.33	4245.33	7873.33	6558.67	267734
d__Bacteria	k__unclassified_d__Bacteria	p__Actinomycetota	c__Actinomycetes	o__Mycobacteriales	f__Dietziaceae	g__Dietzia	858	848	662	1132	1020	1372	1222	1530	1302	1360	1300	1316	1720	1426	1130	1356	896	1336	1416	1352	2308	2588	1126	822	2212	2300	2524	1704	2512	2778	7118	6148	5850	7098	7614	5438	789.333	1283.78	1310.67	1602	2338.33	6544.33	84694
d__Bacteria	k__unclassified_d__Bacteria	p__Actinomycetota	c__Coriobacteriia	o__Anaerosomatales	f__Anaerosomataceae	g__Anaerosoma	4820	4026	3924	1822	1772	2396	2576	2098	3276	2644	3208	2708	6854	5544	4628	11894	8866	11262	9426	6544	6756	7446	2750	1778	3332	3044	3160	2892	2994	4222	7086	6648	6180	6602	6310	6416	4256.67	2500	8174.67	5783.33	3274	6540.33	177904
d__Bacteria	k__unclassified_d__Bacteria	p__Myxococcota	c__Myxococcia	o__Myxococcales	f__Myxococcaceae	g__Corallococcus	7438	6034	5348	10420	8268	9274	9732	14956	8376	11960	11896	11068	9310	10888	13656	7610	6908	10050	4160	3672	5166	5168	5932	6226	7378	5970	6198	15476	9844	14898	6652	6100	6296	6784	7132	6180	6273.33	10661.1	9737	5054	9960.67	6524	302424
d__Bacteria	k__unclassified_d__Bacteria	p__Actinomycetota	c__Actinomycetes	o__Frankiales	f__Frankiaceae	g__Pseudofrankia	2282	1974	1758	11416	9936	10900	10510	11554	8640	11324	11012	11222	5852	4346	3730	3038	1252	4278	2898	2862	4062	4242	2382	2014	8260	8048	8912	6112	8362	9358	6842	5724	5842	7076	7698	5818	2004.67	10723.8	3749.33	3076.67	8175.33	6500	231536
d__Bacteria	k__unclassified_d__Bacteria	p__Actinomycetota	c__Actinomycetes	o__Streptosporangiales	f__Streptosporangiaceae	g__Planobispora	1530	1500	1210	2016	1672	2040	2250	2212	2042	2144	2046	2254	2138	1772	1442	1142	702	1104	1984	1840	3046	3456	1464	1228	3092	2958	3328	2436	3386	3584	6674	5754	6152	7090	7520	5764	1413.33	2075.11	1383.33	2169.67	3130.67	6492.33	101972
d__Archaea	k__unclassified_d__Archaea	p__Euryarchaeota	c__Methanomicrobia	o__Methanophagales	f__unclassified_o__Methanophagales	g__unclassified_o__Methanophagales	7118	5338	6122	6626	6304	8354	8834	8636	9686	7988	9060	7794	7984	7846	5328	5382	5490	5660	7562	6774	8688	5050	4012	2802	11814	10376	11058	12636	8744	15444	6228	6226	6104	6774	6576	6870	6192.67	8142.44	6281.67	5814.67	11678.7	6463	273288
d__Bacteria	k__unclassified_d__Bacteria	p__Pseudomonadota	c__Alphaproteobacteria	o__Caulobacterales	f__Caulobacteraceae	g__Caulobacter	6514	5146	5186	7728	6888	7998	7968	9804	7132	8448	8632	7876	10502	7468	6386	7162	6070	5500	4464	3644	4662	5562	5738	4958	6684	6284	6642	5642	7628	8274	6728	5908	6358	6846	6700	6186	5615.33	8052.67	7181.33	4838	6859	6454.33	241316
d__Bacteria	k__unclassified_d__Bacteria	p__Thermodesulfobacteriota	c__Syntrophorhabdia	o__Syntrophorhabdales	f__Syntrophorhabdaceae	g__Syntrophorhabdus	10042	7378	9434	7056	6462	9314	10584	10744	12306	12228	14610	11488	7590	7122	5620	13258	28380	10696	8308	6706	7636	3362	4184	2802	12192	10954	11158	18930	10948	20392	6224	6640	5878	6606	6424	6916	8951.33	10532.4	12111	5499.67	14095.7	6448	350572
d__Archaea	k__unclassified_d__Archaea	p__Candidatus_Lokiarchaeota	c__unclassified_p__Candidatus_Lokiarchaeota	o__unclassified_p__Candidatus_Lokiarchaeota	f__unclassified_p__Candidatus_Lokiarchaeota	g__unclassified_p__Candidatus_Lokiarchaeota	7994	5950	7190	7446	7012	9590	10330	9700	11890	9786	11692	9618	8892	8550	5778	6942	8668	7250	7000	6272	8302	4658	4322	2746	12592	11152	10878	26106	12194	20404	6336	6138	5966	6508	6850	6698	7044.67	9673.78	7680	5550	15554.3	6416	319400
d__Bacteria	k__unclassified_d__Bacteria	p__Actinomycetota	c__Actinomycetes	o__Micrococcales	f__Ornithinimicrobiaceae	g__Serinicoccus	574	774	464	886	862	1124	1098	1164	1442	1042	1032	976	1592	1162	992	1734	1140	1518	2012	2174	3152	4234	1512	1282	3762	3860	4312	2852	4092	4592	6814	5842	5814	6752	7560	5656	604	1069.56	1356.33	2394.33	3911.67	6406.33	95850
d__Bacteria	k__unclassified_d__Bacteria	p__Myxococcota	c__unclassified_p__Myxococcota	o__Haliangiales	f__Kofleriaceae	g__Haliangium	47532	52690	30954	26746	20124	17940	18278	32764	14372	22418	18978	21152	33880	88184	260704	47166	9194	54754	8504	7720	9698	6594	57932	51800	33606	8762	7156	214520	92650	183756	6366	6418	6358	6038	6958	6290	43725.3	21419.1	82313.7	23708	90075	6404.67	1538956
d__Bacteria	k__unclassified_d__Bacteria	p__Candidatus_Abyssubacteria	c__unclassified_p__Candidatus_Abyssubacteria	o__unclassified_p__Candidatus_Abyssubacteria	f__unclassified_p__Candidatus_Abyssubacteria	g__unclassified_p__Candidatus_Abyssubacteria	8052	6324	7058	7588	7404	10386	11820	12760	11930	13044	14874	11598	9040	8708	6748	7074	7522	8538	8290	6662	8260	3550	5078	3412	11634	9830	10008	19838	11282	20550	6414	6248	6016	6564	6570	6602	7144.67	11267.1	7938.33	5875.33	13857	6402.33	327276
d__Archaea	k__unclassified_d__Archaea	p__Euryarchaeota	c__Methanomicrobia	o__Methanotrichales	f__Methanotrichaceae	g__unclassified_f__Methanotrichaceae	7032	6648	6356	7580	6744	9446	9352	10252	11900	7808	9044	7808	24014	33230	13598	39186	26634	31838	4072	3576	4854	3220	2326	1824	7896	7346	7228	6376	5224	8702	6182	6198	5898	6674	6820	6544	6678.67	8881.56	28083.3	3312	7128.67	6386	369430
d__Bacteria	k__unclassified_d__Bacteria	p__Cyanobacteriota	c__Cyanophyceae	o__Leptolyngbyales	f__Leptolyngbyaceae	g__unclassified_f__Leptolyngbyaceae	5158	4052	4186	7744	6928	8294	8478	9036	8982	8240	9230	7890	8920	7468	5804	5514	4530	4898	10262	7666	7056	10152	12342	11608	7832	7054	7186	6568	6378	9004	6580	6304	6322	6262	6322	6526	4465.33	8313.56	6189	9847.67	7337	6386	266776
d__Bacteria	k__unclassified_d__Bacteria	p__Pseudomonadota	c__Gammaproteobacteria	o__Thiotrichales	f__Thiotrichaceae	g__Beggiatoa	6244	5480	5462	8886	7936	9442	9462	9946	9082	9574	10374	9170	7984	7140	6924	5410	5348	5540	7054	6674	7486	6968	11654	10814	11272	10674	10904	10178	9550	12568	6660	6484	5878	6444	6232	6472	5728.67	9319.11	6391	8441.67	10857.7	6361.67	293370
d__Bacteria	k__unclassified_d__Bacteria	p__Pseudomonadota	c__Gammaproteobacteria	o__Nevskiales	f__Nevskiaceae	g__Solimonas	5348	3686	4032	4292	3830	4558	4638	5566	4072	4464	4632	4648	11220	7258	5768	6800	6500	4506	2294	1898	2392	3232	2728	2880	5442	5394	5566	4748	5324	6422	6784	6308	6334	6526	6088	6078	4355.33	4522.22	7008.67	2570.67	5482.67	6353	182256
d__Bacteria	k__unclassified_d__Bacteria	p__Myxococcota	c__unclassified_p__Myxococcota	o__Polyangiales	f__Labilitrichaceae	g__Labilithrix	10950	7938	7718	21994	18192	19724	19802	24488	14792	26840	23048	22922	10910	15086	14606	11424	9660	14784	5432	4860	6462	6472	11458	7964	10228	6936	6762	36960	21606	32532	6620	6218	6144	6334	6644	6106	8868.67	21311.3	12745	7108	19170.7	6344.33	490616
d__Bacteria	k__unclassified_d__Bacteria	p__Actinomycetota	c__Acidimicrobiia	o__Acidimicrobiales	f__Acidimicrobiaceae	g__Acidimicrobium	6356	4054	4390	7502	6656	7422	7366	8136	6654	7770	7852	7374	8966	6552	5526	4506	2668	4014	3754	3408	4276	7418	4522	4306	5920	6128	6488	4060	6732	6460	6576	5798	5990	6616	7006	6022	4933.33	7414.67	5372	4614	5964.67	6334.67	215244
d__Bacteria	k__unclassified_d__Bacteria	p__Pseudomonadota	c__Gammaproteobacteria	o__Enterobacterales	f__Enterobacteriaceae	g__Escherichia	6492	5764	5434	5900	5154	6212	5632	6636	5686	6112	6274	5992	7468	5624	4950	5254	5962	4968	3920	2922	3786	4290	5166	4964	4988	4694	4536	4434	5154	6092	6074	5548	5736	6366	8298	5900	5896.67	5955.33	5704.33	4174.67	4983	6320.33	198382
d__Bacteria	k__unclassified_d__Bacteria	p__Acidobacteriota	c__Holophagae	o__Holophagales	f__Holophagaceae	g__Geothrix	9542	7160	7458	7940	6572	8030	8930	10364	8668	12164	12790	10266	11622	9848	8486	8496	8638	7980	3246	2774	3386	3014	4152	3416	8110	6666	6930	13752	8802	13966	6366	6094	5776	6658	6642	6290	8053.33	9524.89	9178.33	3331.33	9704.33	6304.33	280994
d__Bacteria	k__unclassified_d__Bacteria	p__Pseudomonadota	c__Alphaproteobacteria	o__Hyphomicrobiales	f__Rhizobiaceae	g__Sinorhizobium	4828	3946	4056	14530	11944	13404	13714	17182	11660	14342	14250	13782	9416	6754	6444	5032	4444	5268	3668	3178	4312	3976	6142	4640	5792	5728	5986	4422	5480	6484	6250	5810	5874	6560	7002	6054	4276.67	13867.6	6226.33	4319.33	5648.67	6258.33	272354
d__Bacteria	k__unclassified_d__Bacteria	p__Pseudomonadota	c__Alphaproteobacteria	o__Hyphomicrobiales	f__Ahrensiaceae	g__Ahrensia	4098	2704	3264	13674	10212	11482	12114	16378	9914	11002	11312	10770	7190	4648	4464	4178	3178	4146	4136	3610	4232	5384	5518	3866	7848	7918	8784	5220	9330	9632	5940	5352	5758	6782	7778	5872	3355.33	11873.1	4634	4457.67	8122	6247	257688
d__Bacteria	k__unclassified_d__Bacteria	p__Actinomycetota	c__Actinomycetes	o__Streptosporangiales	f__Thermomonosporaceae	g__Actinocorallia	1472	1168	1112	2662	2236	2410	2456	2610	2192	2360	2528	2356	2030	1618	1370	912	516	1052	1338	1314	2060	2734	1226	888	3192	3298	3482	2264	3150	3412	6486	5784	5746	6898	6974	5592	1250.67	2423.33	1249.67	1593.33	3133	6246.67	98898
d__Bacteria	k__unclassified_d__Bacteria	p__Actinomycetota	c__Actinomycetes	o__Geodermatophilales	f__Geodermatophilaceae	g__Klenkia	1746	1240	1196	978	768	1042	944	1048	1052	896	1018	964	1240	1010	810	582	344	518	1662	1656	2294	3660	1206	1058	2412	2494	2472	1974	2648	2880	6662	5558	5318	6720	7680	5302	1394	967.778	750.667	1922.67	2480	6206.67	81052
d__Bacteria	k__unclassified_d__Bacteria	p__Planctomycetota	c__Candidatus_Brocadiia	o__Candidatus_Brocadiales	f__Candidatus_Brocadiaceae	g__Candidatus_Brocadia	6234	4674	5574	9208	8378	10138	10908	11626	11034	11706	13202	10748	8474	7866	6206	6350	7016	6438	7096	5730	6588	3970	5206	4918	10150	9066	8968	11694	8974	14426	6148	5970	5850	6562	6230	6442	5494	10772	7058.33	5584.67	10546.3	6200.33	289768
d__Bacteria	k__unclassified_d__Bacteria	p__Pseudomonadota	c__Alphaproteobacteria	o__Sneathiellales	f__Sneathiellaceae	g__Sneathiella	4916	4180	4042	19644	16764	17146	16524	20292	13550	15066	15320	13872	9232	7068	5318	4710	3826	5692	6788	5402	7410	7128	11760	9938	7318	7126	7602	6006	8090	8676	6046	5680	5972	6264	7136	6068	4379.33	16464.2	5974.33	8071	7469.67	6194.33	327572
d__Bacteria	k__unclassified_d__Bacteria	p__Planctomycetota	c__Planctomycetia	o__Pirellulales	f__Lacipirellulaceae	g__Posidoniimonas	2440	2694	3236	33388	24216	26936	27124	37884	22292	28338	29208	27524	17534	11608	8874	7808	6224	7264	3034	2842	4052	4504	3750	3582	5842	5278	5452	6046	8038	9174	6476	5590	5606	6332	6656	6418	2790	28545.6	9885.33	3627.33	6638.33	6179.67	423264
d__Bacteria	k__unclassified_d__Bacteria	p__Chloroflexota	c__Chloroflexia	o__Herpetosiphonales	f__Herpetosiphonaceae	g__Herpetosiphon	5804	5302	4812	7848	7482	9124	9838	9350	11400	8940	10428	9366	9950	9154	6434	7570	6238	6794	4568	4198	5256	3592	2680	2646	7936	7018	6906	6550	5570	9240	6286	5896	6136	6272	6444	6034	5306	9308.44	7690	3823.33	7203.33	6178	249062
d__Bacteria	k__unclassified_d__Bacteria	p__Actinomycetota	c__Actinomycetes	o__Micromonosporales	f__Micromonosporaceae	g__Solwaraspora	1382	910	974	2810	2480	2650	2194	2312	2114	2922	2950	2534	1860	1754	1258	830	472	886	1280	1278	2152	2674	1350	1232	2240	2086	2194	1802	2356	2792	6574	5748	5730	6434	7160	5376	1088.67	2551.78	1176.67	1661	2245	6170.33	93750
d__Bacteria	k__unclassified_d__Bacteria	p__Actinomycetota	c__Rubrobacteria	o__Gaiellales	f__Gaiellaceae	g__Candidatus_Gaiellasilicea	8922	7914	7308	42650	32368	36272	41298	51168	27692	82604	70038	56662	13720	10380	5782	5730	1930	8852	2804	2252	3788	2420	5532	6322	3278	3062	3294	2868	3068	4168	6174	6206	5916	6358	6386	5680	8048	48972.4	7732.33	3853	3289.67	6120	590866
d__Bacteria	k__unclassified_d__Bacteria	p__Pseudomonadota	c__Gammaproteobacteria	o__Methylococcales	f__Methylococcaceae	g__Methylotetracoccus	4640	3310	3446	3600	2988	3440	3604	4038	3310	3858	4184	3666	7120	5148	3900	3562	3506	2470	2120	2046	2366	2756	2486	2424	5334	5254	5348	4102	4274	5448	6164	5936	5856	6800	6094	5854	3798.67	3632	4284.33	2366.33	4960	6117.33	150452
d__Bacteria	k__unclassified_d__Bacteria	p__Candidatus_Woesebacteria	c__unclassified_p__Candidatus_Woesebacteria	o__unclassified_p__Candidatus_Woesebacteria	f__unclassified_p__Candidatus_Woesebacteria	g__unclassified_p__Candidatus_Woesebacteria	12926	7132	11734	8110	8640	13100	14980	14708	16516	11696	14774	11720	8176	6680	5100	4688	5806	7810	14542	11714	11690	5004	7660	4724	19444	19220	18058	26134	16118	31432	6006	6284	5760	6012	5916	6662	10597.3	12693.8	6376.67	9222.33	21734.3	6106.67	406676
d__Bacteria	k__unclassified_d__Bacteria	p__Pseudomonadota	c__Gammaproteobacteria	o__Methylococcales	f__Methylococcaceae	g__Methylomonas	5050	4062	3914	5546	5040	5940	5744	7004	5588	5704	6296	5998	5684	4860	4288	4726	5970	3804	4228	3364	4086	4410	5542	4716	8292	7922	8492	5894	6238	7546	6330	6016	5874	6472	5894	5974	4342	5873.33	4888.67	4391	7397.33	6093.33	202508
d__Bacteria	k__unclassified_d__Bacteria	p__Candidatus_Krumholzibacteriota	c__unclassified_p__Candidatus_Krumholzibacteriota	o__unclassified_p__Candidatus_Krumholzibacteriota	f__unclassified_p__Candidatus_Krumholzibacteriota	g__unclassified_p__Candidatus_Krumholzibacteriota	7784	5244	6280	6800	5962	7240	7886	8268	7710	9564	10810	7792	7906	8030	6488	7100	8396	6622	6248	5260	6938	4428	7294	5236	11244	8880	9394	25766	14164	21230	6046	6082	5926	6130	6128	6164	6436	8003.56	7423.67	5900.67	15113	6079.33	298440
d__Bacteria	k__unclassified_d__Bacteria	p__Actinomycetota	c__Actinomycetes	o__Micrococcales	f__Cellulomonadaceae	g__Paraoerskovia	226	458	172	418	330	418	490	520	668	478	446	538	994	800	616	502	304	354	1624	1700	2614	3100	1164	824	2528	2460	2740	2002	2896	3008	6342	5508	5634	6580	7152	5202	285.333	478.444	595	1837.67	2605.67	6069.67	71810
d__Bacteria	k__unclassified_d__Bacteria	p__Actinomycetota	c__Actinomycetes	o__Pseudonocardiales	f__Pseudonocardiaceae	g__Kutzneria	1158	1046	930	2036	1876	2040	2094	2228	1982	2066	2084	2082	2068	1960	2130	1126	686	1210	1538	1680	2180	2920	1476	1114	2606	2614	2818	2088	2646	3206	6362	5590	5380	6524	7006	5370	1044.67	2054.22	1530	1818	2663	6038.67	93920
d__Bacteria	k__unclassified_d__Bacteria	p__Chloroflexota	c__Tepidiformia	o__Tepidiformales	f__Tepidiformaceae	g__Tepidiforma	23820	13276	17152	22266	21202	23492	25302	29214	16942	34798	34932	27442	17022	15356	10910	9812	2582	16248	3964	3774	4814	5870	5030	5142	6368	6090	6610	5236	6140	7644	6288	5710	5644	6194	6542	5832	18082.7	26176.7	11988.3	4765.67	6348	6035	464660
d__Bacteria	k__unclassified_d__Bacteria	p__Thermodesulfobacteriota	c__Desulfobulbia	o__Desulfobulbales	f__Desulfocapsaceae	g__Desulfosediminicola	6168	5396	5396	8350	7250	10492	9992	9118	17434	9752	12738	9674	4968	4970	4602	2812	2920	3658	9458	8100	12012	9512	6484	5598	18948	20680	21274	14360	16234	23308	6406	6128	5960	5760	5468	6334	5653.33	10533.3	3988.33	8527.33	19134	6009.33	337714
d__Bacteria	k__unclassified_d__Bacteria	p__Pseudomonadota	c__Gammaproteobacteria	o__Acidiferrobacterales	f__Acidiferrobacteraceae	g__Sulfurifustis	7030	5482	5336	14534	13752	12638	12408	12788	8998	17298	18080	13416	8036	5628	5116	5014	4500	4880	4746	3618	5144	4502	15914	10218	7776	8264	8482	4806	5708	6074	6474	6070	5696	6296	5582	5720	5949.33	13768	5529	7357	6851.67	5973	296024
d__Bacteria	k__unclassified_d__Bacteria	p__Pseudomonadota	c__Betaproteobacteria	o__Burkholderiales	f__Comamonadaceae	g__Ottowia	4856	3798	3630	2972	2682	2888	3006	3298	2880	3104	3440	2988	5950	4348	3488	3930	5824	2612	2398	2210	3340	2726	2230	1866	4928	4480	4896	4248	5258	5056	6568	6380	6310	5536	5292	5524	4094.67	3028.67	4358.67	2461.67	4811	5935	144940
d__Bacteria	k__unclassified_d__Bacteria	p__Pseudomonadota	c__Gammaproteobacteria	o__Chromatiales	f__Ectothiorhodospiraceae	g__Acidihalobacter	4060	3220	3148	2962	2742	3386	3274	3470	3276	3092	3520	3242	4714	3776	3506	2854	3124	2668	3454	2962	3526	3860	4778	4204	7300	6922	7340	5456	5924	6958	6470	6078	5834	6020	5284	5898	3476	3218.22	3440.33	3797.33	6650	5930.67	158302
d__Bacteria	k__unclassified_d__Bacteria	p__Actinomycetota	c__Actinomycetes	o__Streptosporangiales	f__Streptosporangiaceae	g__Acrocarpospora	1596	1514	1302	2682	2174	2528	2594	2620	2434	2610	2696	2656	2472	2010	1618	1234	710	1130	1408	1308	1988	2604	1142	946	2408	2454	2438	1778	2510	2862	6254	5304	5590	6526	6864	4966	1470.67	2554.89	1529	1566	2408.33	5917.33	95930
d__Bacteria	k__unclassified_d__Bacteria	p__Nitrospinota	c__Nitrospinia	o__Nitrospinales	f__Nitrospinaceae	g__Nitrospina	11778	9312	11724	10028	9156	11364	12696	12838	13448	12728	14786	11766	7168	6766	5640	4892	4796	6484	18296	11262	16628	5192	9152	7434	14670	12316	13264	18990	11878	21728	5954	6184	5566	5496	5632	6498	10938	12090	5957.67	11327.3	15474.3	5888.33	373510
d__Bacteria	k__unclassified_d__Bacteria	p__Campylobacterota	c__Epsilonproteobacteria	o__Campylobacterales	f__Sulfurovaceae	g__Sulfurovum	40464	104540	48856	29714	32862	37884	25800	22504	67474	26834	46118	44418	55982	42094	35060	25334	16698	62604	15142	15806	21166	31430	4602	2300	9682	7054	7786	10270	8328	14530	4872	4438	4034	6866	8180	6814	64620	37067.6	39628.7	15074.3	9608.33	5867.33	948540
d__Bacteria	k__unclassified_d__Bacteria	p__Actinomycetota	c__Actinomycetes	o__Streptosporangiales	f__Nocardiopsaceae	g__Streptomonospora	654	588	448	612	536	724	888	814	768	822	796	814	1100	902	748	542	336	562	1280	1280	2136	2460	958	840	1830	1788	1988	1582	2032	2386	6240	5414	5422	6282	6852	4918	563.333	752.667	698.333	1492.33	1934.33	5854.67	68342
d__Bacteria	k__unclassified_d__Bacteria	p__Planctomycetota	c__Planctomycetia	o__Planctomycetales	f__Planctomycetaceae	g__Crateriforma	1622	1960	1342	4412	2978	4134	4262	5498	4080	4002	4410	4298	7174	5548	4070	5864	5270	3800	4794	5148	6226	8344	4760	4490	7286	6396	7030	7534	9046	10822	5882	5210	5456	5804	6528	6118	1641.33	4230.44	5287.67	5627	8019	5833	191598
d__Bacteria	k__unclassified_d__Bacteria	p__Actinomycetota	c__Actinomycetes	o__Micromonosporales	f__Micromonosporaceae	g__Asanoa	1574	1402	1166	2804	2454	2758	2774	2742	2378	3134	2948	2890	3092	2464	2060	1674	1228	1470	2006	2102	2832	3898	1854	1566	3692	3642	3758	2880	3776	4114	6144	5400	5246	6376	6608	5198	1380.67	2764.67	1998	2376.33	3643.67	5828.67	112104
d__Archaea	k__unclassified_d__Archaea	p__Nitrososphaerota	c__Nitrososphaeria	o__Nitrososphaerales	f__Nitrososphaeraceae	g__Nitrososphaera	6008	4886	5418	22244	17906	19950	18768	19616	17206	14738	17626	16054	13820	10026	7208	7764	6334	8562	5018	4406	6204	4334	4912	4580	10732	9748	9466	6826	6092	9772	5814	5586	5738	5902	5898	5928	5437.33	18234.2	8952.33	4909	8772.67	5811	351090
d__Bacteria	k__unclassified_d__Bacteria	p__Pseudomonadota	c__Alphaproteobacteria	o__Rhodobacterales	f__Paracoccaceae	g__Aliiroseovarius	9672	6024	7200	4642	3820	4642	4562	5268	4642	4420	4298	4840	6668	4292	3714	4050	3822	3292	5294	4466	4822	8864	6344	5848	5062	5122	5080	3448	5092	5442	6052	5246	5362	5816	6518	5788	7632	4570.44	4306.33	5939.67	4874.33	5797	189534
d__Bacteria	k__unclassified_d__Bacteria	p__Pseudomonadota	c__Betaproteobacteria	o__Rhodocyclales	f__Zoogloeaceae	g__Zoogloea	9428	7806	6856	6126	5694	5508	5728	6546	4896	5924	6256	5298	11430	7070	6344	5628	5546	4112	2138	1714	2192	2432	2686	2426	4208	4214	4228	3238	3634	4524	5900	5724	5498	6474	5730	5438	8030	5775.11	6688.33	2264.67	4007.67	5794	188594
d__Bacteria	k__unclassified_d__Bacteria	p__Cyanobacteriota	c__Cyanophyceae	o__Oscillatoriales	f__Oscillatoriaceae	g__Oscillatoria	4808	4128	4036	8452	7282	8598	8338	9814	9156	8396	9772	8386	19378	12914	11016	7368	6424	6466	5494	4720	5202	6104	6202	5004	7488	6928	6720	7674	6712	10020	5630	5512	5606	5782	6022	6140	4324	8688.22	10594.3	5454.33	7590.33	5782	267692
d__Bacteria	k__unclassified_d__Bacteria	p__Rhodothermota	c__Rhodothermia	o__Rhodothermales	f__Rhodothermaceae	g__Rhodothermus	7660	4830	5752	8318	7374	8388	8888	9288	8392	9830	10336	8500	9330	8372	6992	7094	7008	6604	5824	4622	5376	6858	7780	7080	9818	8368	8314	13080	11744	14336	5992	5616	5514	5668	5798	6008	6080.67	8812.67	7566.67	6256.67	10943.3	5766	280752
d__Bacteria	k__unclassified_d__Bacteria	p__Actinomycetota	c__Actinomycetes	o__Frankiales	f__Frankiaceae	g__Parafrankia	1474	1126	1286	9452	8488	9304	8480	9860	7692	8822	8986	9350	4092	3388	2610	2144	812	3128	2582	2734	3712	4072	2260	1936	7726	7558	8322	5634	7678	8550	5928	5446	5362	6192	6416	5244	1295.33	8937.11	2695.67	2882.67	7578	5764.67	197846
d__Bacteria	k__unclassified_d__Bacteria	p__Verrucomicrobiota	c__Opitutae	o__Opitutales	f__Opitutaceae	g__Opitutus	8640	7800	6376	13750	11074	13114	14332	17398	12842	16726	17232	15836	14302	10776	8616	8768	8974	7548	3928	3416	4544	4012	4506	3882	6812	6034	6280	8226	7794	10488	6050	5456	5540	5944	5944	5636	7605.33	14700.4	9830.67	4048	7605.67	5761.67	318596
d__Bacteria	k__unclassified_d__Bacteria	p__Verrucomicrobiota	c__Verrucomicrobiae	o__Verrucomicrobiales	f__Verrucomicrobiaceae	g__Prosthecobacter	5242	9556	4338	10046	8152	12208	11756	17240	11266	11884	12048	14114	25588	16798	13778	8696	8776	6868	3094	2836	3610	4432	4032	3174	4828	4536	4552	6060	6558	7836	6172	4940	5596	5514	6322	5858	6378.67	12079.3	13417.3	3529.67	5728.33	5733.67	298304
d__Bacteria	k__unclassified_d__Bacteria	p__Planctomycetota	c__Planctomycetia	o__Isosphaerales	f__Isosphaeraceae	g__Paludisphaera	3554	3650	3220	9708	7048	8292	8682	11100	7592	9538	10182	8258	13948	9594	7390	5798	5408	5080	2896	2750	3558	3704	3444	2850	5618	4908	5260	6224	6306	8226	5668	5140	5408	6006	5852	6056	3474.67	8933.33	7869.67	3200.33	6090.33	5688.33	227916
d__Bacteria	k__unclassified_d__Bacteria	p__Thermodesulfobacteriota	c__Desulfobacteria	o__Desulfobacterales	f__Desulfobacteraceae	g__Desulfamplus	3516	3048	3222	4056	3792	5510	6220	5004	8824	4542	6164	5146	5912	5796	4726	4234	5826	3994	6564	5452	5500	3096	3972	2932	13114	11128	11764	18546	12978	20920	5610	5692	5060	5894	5880	5822	3262	5473.11	5081.33	4586	14741.7	5659.67	239456
d__Bacteria	k__unclassified_d__Bacteria	p__Actinomycetota	c__Nitriliruptoria	o__Egibacterales	f__Egibacteraceae	g__Egibacter	17712	8222	12384	7278	6230	7362	7156	7566	6536	8820	8562	7142	8650	7462	6410	3370	1228	3364	3740	3808	3996	9468	6526	6988	4416	4336	4548	3750	4982	5268	5850	5162	5320	5936	6116	5384	12772.7	7405.78	5080.67	5754.33	4550	5628	231048
d__Bacteria	k__unclassified_d__Bacteria	p__Pseudomonadota	c__Gammaproteobacteria	o__Chromatiales	f__Chromatiaceae	g__Candidatus_Tenderia	5534	4142	4618	5546	4774	5162	5328	5498	5658	5716	6032	5466	5306	5772	12434	4168	5712	4804	6350	5576	6086	6044	11820	7738	13460	12984	13622	8520	9174	11172	6056	6006	5752	5292	4770	5862	4764.67	5464.44	6366	7269	11488.7	5623	247954
d__Bacteria	k__unclassified_d__Bacteria	p__Pseudomonadota	c__Betaproteobacteria	o__Rhodocyclales	f__Rhodocyclaceae	g__Azospira	9464	6092	6854	11148	9892	8822	8724	8988	5892	10098	10148	7790	14374	8934	7280	4510	4320	3728	1700	1322	1828	2110	3442	2568	2940	2850	2842	3008	3306	3588	6010	5552	5514	6086	5278	5254	7470	9055.78	7191	2161.67	3089	5615.67	212256
d__Bacteria	k__unclassified_d__Bacteria	p__Actinomycetota	c__Actinomycetes	o__Streptosporangiales	f__Treboniaceae	g__Trebonia	2794	2010	1956	3500	3004	3432	3458	3724	3120	4362	3930	3898	2910	2366	1804	1488	836	1530	1630	1482	2132	2728	1550	1386	2646	2972	3004	2252	2932	3282	5832	5244	5220	6062	6312	4946	2253.33	3603.11	1822.33	1818	2848	5602.67	111734
d__Bacteria	k__unclassified_d__Bacteria	p__Actinomycetota	c__Actinomycetes	o__Propionibacteriales	f__Nocardioidaceae	g__Friedmanniella	554	674	380	788	670	972	942	1080	904	798	828	934	1024	840	650	634	358	706	852	858	1486	1790	616	590	1442	1452	1568	1208	1570	1872	5982	4948	4976	6270	6422	4910	536	879.556	702	1032	1518.67	5584.67	62548
d__Bacteria	k__unclassified_d__Bacteria	p__Pseudomonadota	c__Gammaproteobacteria	o__Xanthomonadales	f__Xanthomonadaceae	g__Xanthomonas	5296	3926	4166	3614	3022	3548	3332	4306	3268	3552	3876	3518	6086	4542	4222	4478	4952	3774	3192	2508	3050	4026	4116	3772	5088	4514	4718	4874	5908	6210	5754	5546	5302	5846	5750	5242	4462.67	3559.56	4675.67	3444	5218.67	5573.33	158894
d__Archaea	k__unclassified_d__Archaea	p__Euryarchaeota	c__Theionarchaea	o__unclassified_c__Theionarchaea	f__unclassified_c__Theionarchaea	g__unclassified_c__Theionarchaea	7364	5292	6512	5400	5228	7472	7506	7162	8638	6696	7962	6714	6774	6510	4504	4654	3990	5048	5936	5168	6664	3852	3084	2282	7950	7012	6914	9124	5914	11176	5330	5548	5012	5552	5874	6114	6389.33	6975.33	5246.67	4497.67	8015	5571.67	221932
d__Bacteria	k__unclassified_d__Bacteria	p__Actinomycetota	c__Actinomycetes	o__Kitasatosporales	f__Streptomycetaceae	g__Allostreptomyces	720	836	480	482	384	482	540	452	576	410	438	372	998	786	686	344	224	374	1404	1294	2088	2476	914	700	2284	2494	2746	1732	2470	2800	5980	5170	5050	6070	6322	4744	678.667	459.556	568.667	1479.33	2421	5556	66322
d__Bacteria	k__unclassified_d__Bacteria	p__Thermomicrobiota	c__Thermomicrobia	o__Thermomicrobiales	f__Thermomicrobiaceae	g__Thermomicrobium	5260	4046	4110	10386	8332	8868	9042	9286	7998	9986	10154	8920	9478	8390	5938	4972	3072	5652	3360	3258	4236	3730	2714	2432	5706	5028	5242	5388	4684	7228	5470	5320	5272	5730	5978	5414	4472	9219.11	6250.33	3288.33	5546	5530.67	220080
d__Bacteria	k__unclassified_d__Bacteria	p__Actinomycetota	c__Actinomycetes	o__Propionibacteriales	f__Propionibacteriaceae	g__Raineyella	856	786	552	450	462	566	610	630	638	620	536	624	1150	1022	744	790	548	750	818	838	1260	1750	580	536	1608	1676	1840	1326	1650	1998	5860	5064	5050	5910	6420	4658	731.333	570.667	834	963.667	1683	5493.67	61176
d__Bacteria	k__unclassified_d__Bacteria	p__Actinomycetota	c__Actinomycetes	o__Pseudonocardiales	f__Pseudonocardiaceae	g__Thermocrispum	1646	928	1220	1340	1212	1554	1508	1522	1424	1498	1608	1310	1674	1468	1228	650	274	592	1476	1426	2078	2728	1608	1256	2266	2078	2250	1546	2180	2328	5808	5010	4896	5932	6278	4710	1264.67	1441.78	981	1762	2108	5439	78510
d__Bacteria	k__unclassified_d__Bacteria	p__Actinomycetota	c__Actinomycetes	o__Pseudonocardiales	f__Pseudonocardiaceae	g__Prauserella	2394	1694	1886	3108	2618	2926	3008	3220	2754	3700	3380	3164	2760	2158	1776	1332	670	1432	1798	1700	2476	3112	1746	1560	3340	3252	3600	2630	3336	3694	5858	4966	4922	5878	6200	4740	1991.33	3097.56	1688	2065.33	3308.67	5427.33	108788
d__Bacteria	k__unclassified_d__Bacteria	p__Actinomycetota	c__Actinomycetes	o__Mycobacteriales	f__Mycobacteriaceae	g__Mycolicibacter	1032	860	752	3830	3308	3244	3198	4052	2760	3566	3338	3476	1872	1518	1288	1016	630	1372	1244	1222	1720	2148	996	854	2128	2234	2394	1680	2524	2850	5590	4704	4892	5992	6740	4602	881.333	3419.11	1282.67	1364	2301.67	5420	95626
d__Bacteria	k__unclassified_d__Bacteria	p__Actinomycetota	c__Nitriliruptoria	o__Nitriliruptorales	f__Nitriliruptoraceae	g__Profundirhabdus	9664	4818	6966	4748	4254	5004	4810	4556	4784	4918	5096	4382	6438	5008	4282	2724	1624	2638	7986	6270	5416	16292	10870	12092	4900	4922	5234	3854	5848	5606	5866	4888	5204	5486	6038	5028	7149.33	4728	3785.67	9821	5060.67	5418.33	208514
d__Bacteria	k__unclassified_d__Bacteria	p__Pseudomonadota	c__Gammaproteobacteria	o__Cellvibrionales	f__Halieaceae	g__Kineobactrum	4476	3638	3444	3118	2882	3828	3750	4064	3592	3130	3690	3388	3506	2936	2594	3508	4338	2474	4524	3766	4874	7704	4456	4334	12060	12466	12872	8944	11490	11544	5968	5780	5960	4638	4544	5526	3852.67	3493.56	3226	4943	11562.7	5402.67	193806
d__Bacteria	k__unclassified_d__Bacteria	p__Actinomycetota	c__Actinomycetes	o__Micrococcales	f__Dermabacteraceae	g__Brachybacterium	656	712	492	878	814	1044	1006	1044	1058	1040	1080	1224	1428	936	876	826	544	756	1324	1148	1866	2770	1030	846	1954	2044	2056	1526	2118	2234	5866	4576	5060	5672	6398	4812	620	1020.89	894.333	1497.33	1988.67	5397.33	69714
d__Bacteria	k__unclassified_d__Bacteria	p__Pseudomonadota	c__Alphaproteobacteria	o__Rhodospirillales	f__Thalassobaculaceae	g__Nisaea	3764	2938	3022	16670	14628	14512	14180	16750	11454	11812	11954	10844	7700	6370	4700	3404	2362	4630	7758	6844	8088	9476	11534	10640	8404	8022	8612	6062	9240	9620	5380	5032	5094	5528	5906	5442	3241.33	13644.9	4861	9056.67	8326.67	5397	298376
d__Archaea	k__unclassified_d__Archaea	p__Euryarchaeota	c__Methanomicrobia	o__Methanomicrobiales	f__Methanomicrobiaceae	g__Methanoculleus	4952	3358	3752	4142	3640	4822	4880	4760	5742	4488	5240	4284	19916	19618	14602	61178	49538	42812	2988	2894	3604	2262	1944	1250	6490	5592	5658	5930	4578	7716	4996	5048	4654	5746	6022	5882	4020.67	4666.44	34610.7	2490.33	5994	5391.33	344978
d__Bacteria	k__unclassified_d__Bacteria	p__Pseudomonadota	c__Alphaproteobacteria	o__Rhodobacterales	f__Paracoccaceae	g__Sedimentimonas	4896	6006	4318	974	1122	2148	2236	2716	6104	3230	2264	4668	10774	6036	3710	31122	38292	18486	606	442	376	800	610	584	510	514	602	336	632	584	5654	3648	4428	5048	8558	4774	5073.33	2829.11	18070	569.667	529.667	5351.67	187808
d__Bacteria	k__unclassified_d__Bacteria	p__Pseudomonadota	c__Gammaproteobacteria	o__Chromatiales	f__Chromatiaceae	g__Thiorhodovibrio	1706	1402	1314	1502	1186	1320	1398	1486	1482	1418	1516	1336	1998	1790	1434	1766	1908	1236	4156	4104	3894	3948	2694	2566	14930	14492	14624	9036	9528	10266	5620	4964	5084	6024	5190	5216	1474	1404.89	1688.67	3560.33	12146	5349.67	153534
d__Bacteria	k__unclassified_d__Bacteria	p__Pseudomonadota	c__Alphaproteobacteria	o__Rhodobacterales	f__Roseobacteraceae	g__Phaeobacter	3858	3750	3172	3370	2854	3660	3564	4572	3488	3476	3284	3768	4376	2732	2356	3392	3558	2706	3584	2832	3292	4990	4064	3614	4178	4018	4378	2678	4404	4312	5692	4800	5112	5224	5894	5368	3593.33	3559.56	3186.67	3729.33	3994.67	5348.33	140370
d__Bacteria	k__unclassified_d__Bacteria	p__Bacteroidota	c__Cytophagia	o__Cytophagales	f__Hymenobacteraceae	g__Hymenobacter	6460	4338	6656	6532	5520	6662	6584	7918	6378	7378	7746	6556	9304	7222	5830	6996	10458	5496	3846	3308	4426	4938	3888	3398	7698	6582	6894	10212	8546	11270	5432	5320	5146	5312	5350	5496	5818	6808.22	7551	3967.33	8533.67	5342.67	231096
d__Bacteria	k__unclassified_d__Bacteria	p__Actinomycetota	c__Actinomycetes	o__Micrococcales	f__Brevibacteriaceae	g__Brevibacterium	612	756	512	1300	1128	1352	1194	1472	1170	1534	1442	1552	1584	1248	916	904	580	934	1330	1480	2206	2784	1178	830	1980	1900	2308	1610	2246	2460	5584	4746	4972	5764	6306	4674	626.667	1349.33	1027.67	1634.67	2084	5341	74548
d__Bacteria	k__unclassified_d__Bacteria	p__Candidatus_Handelsmanbacteria	c__unclassified_p__Candidatus_Handelsmanbacteria	o__unclassified_p__Candidatus_Handelsmanbacteria	f__unclassified_p__Candidatus_Handelsmanbacteria	g__unclassified_p__Candidatus_Handelsmanbacteria	9286	6722	7318	10252	8990	10634	11020	11600	10560	12894	13804	11346	9502	8260	6274	6000	4962	6436	5078	4504	6050	4600	5142	4420	8464	7576	7640	10482	8396	12976	5024	5348	5338	5240	5492	5562	7775.33	11233.3	6905.67	4965.67	9255.67	5334	283192
d__Bacteria	k__unclassified_d__Bacteria	p__Pseudomonadota	c__Alphaproteobacteria	o__Rhodobacterales	f__Roseobacteraceae	g__Jannaschia	5812	3582	4178	4112	3462	4172	4294	5104	3808	4090	3920	4476	7626	4590	3972	4364	4244	3160	5442	3882	3622	9504	6056	5596	3652	3632	3872	2748	4564	4386	5650	4650	4914	5370	6148	5200	4524	4159.78	4659.33	5683.67	3809	5322	167854
d__Bacteria	k__unclassified_d__Bacteria	p__Pseudomonadota	c__Alphaproteobacteria	o__Sphingomonadales	f__Sphingomonadaceae	g__Sphingopyxis	4874	2730	3952	3598	3340	3974	3760	4490	3464	3964	4144	3738	4942	3160	3154	3718	3138	3096	2040	1656	2486	3142	2352	2136	2962	2852	3046	2324	3316	3276	5558	5108	5164	5520	5764	4816	3852	3830.22	3534.67	2302	2962.67	5321.67	130754
d__Bacteria	k__unclassified_d__Bacteria	p__Pseudomonadota	c__Alphaproteobacteria	o__Rhodobacterales	f__Paracoccaceae	g__Pseudooceanicola	6316	4378	5000	4412	3928	5306	4312	6346	4556	4404	4554	6062	6962	3860	4114	4154	3810	3682	3832	2890	2770	7034	4366	4388	3560	3800	4202	2412	4224	4124	5622	4366	4970	5614	6020	5094	5231.33	4875.56	4430.33	4213.33	3720.33	5281	165444
d__Bacteria	k__unclassified_d__Bacteria	p__Pseudomonadota	c__Gammaproteobacteria	o__Chromatiales	f__Granulosicoccaceae	g__Sulfuriflexus	5156	3756	4496	3988	3538	4158	4306	4128	4384	4898	5318	4968	3634	3414	4706	2406	3564	3274	5956	5030	5510	5220	11742	5512	14724	14716	15560	7364	7700	9620	5544	5868	5646	4984	4156	5438	4469.33	4409.56	3499.67	6495	11614	5272.67	214382
d__Bacteria	k__unclassified_d__Bacteria	p__Pseudomonadota	c__Betaproteobacteria	o__Burkholderiales	f__Burkholderiaceae	g__Limnobacter	12156	7456	8644	2168	1972	1904	2108	2398	1724	2074	2168	2062	13204	7190	6190	4786	4966	2718	950	684	864	984	1232	1160	1150	1022	1122	956	1230	1428	5360	5844	5362	5526	4744	4712	9418.67	2064.22	6509	979	1151.33	5258	130218
d__Bacteria	k__unclassified_d__Bacteria	p__Pseudomonadota	c__Alphaproteobacteria	o__Rhodobacterales	f__Roseobacteraceae	g__Rubellimicrobium	4298	2732	2936	3776	3372	3920	3858	4890	3776	4548	4548	4828	9082	6004	4606	4224	3966	3094	2048	1700	1812	2652	2698	2772	2384	2384	2504	1880	2582	3038	5328	4620	4856	5902	6166	4606	3322	4168.44	5162.67	2280.33	2462	5246.33	138390
d__Bacteria	k__unclassified_d__Bacteria	p__Pseudomonadota	c__Alphaproteobacteria	o__Sphingomonadales	f__Sphingomonadaceae	g__Sphingobium	4782	3104	4856	9932	9164	10670	10630	12364	8738	10346	10308	10146	7576	5732	5376	4176	3422	4858	2916	2452	3030	3204	4302	3380	7378	7964	8184	5584	6602	7488	5344	4982	5030	5268	5604	5226	4247.33	10255.3	5190	3214	7200	5242.33	230118
d__Bacteria	k__unclassified_d__Bacteria	p__Pseudomonadota	c__Gammaproteobacteria	o__Enterobacterales	f__Enterobacteriaceae	g__Klebsiella	3706	3122	3032	3626	3076	3486	3592	3930	3298	3494	3716	3574	4202	3622	3228	3262	4278	3032	2302	2030	2642	2710	3088	3016	3432	3286	3322	3370	3740	4306	4578	4394	4610	4920	7978	4760	3286.67	3532.44	3604	2631.33	3576	5206.67	131760
d__Bacteria	k__unclassified_d__Bacteria	p__Actinomycetota	c__Actinomycetes	o__Micrococcales	f__Cellulomonadaceae	g__Oerskovia	684	702	548	768	562	864	764	810	812	726	716	728	1274	914	804	660	474	506	1284	1246	1888	2316	828	656	2104	2094	2224	1694	2216	2554	5658	4798	4932	5490	5796	4406	644.667	750	772	1369.67	2147.67	5180	65500
d__Bacteria	k__unclassified_d__Bacteria	p__Thermodesulfobacteriota	c__Desulfarculia	o__Desulfarculales	f__Desulfarculaceae	g__Desulfarculus	7518	5718	6948	5936	5508	7684	8514	8544	9362	8972	10354	8268	5448	5726	4634	4936	5430	5614	11198	8374	8722	3378	5766	3322	10952	9822	9418	21774	11490	23438	5006	5076	4806	5406	5110	5666	6728	8126.89	5298	6793.33	14482.3	5178.33	283838
d__Bacteria	k__unclassified_d__Bacteria	p__Pseudomonadota	c__Alphaproteobacteria	o__Hyphomicrobiales	f__Beijerinckiaceae	g__Rhodoblastus	3810	2734	2684	6852	5298	6224	6612	8522	5994	6712	6676	6428	6620	4748	3748	5270	4164	3944	1946	1734	2214	2346	2686	2214	3334	3110	3224	2672	3410	3842	5322	4846	4868	5476	5566	4982	3076	6590.89	4749	2190	3265.33	5176.67	160832
d__Archaea	k__unclassified_d__Archaea	p__Nitrososphaerota	c__unclassified_p__Nitrososphaerota	o__unclassified_p__Nitrososphaerota	f__unclassified_p__Nitrososphaerota	g__unclassified_p__Nitrososphaerota	7722	5642	7058	24518	19612	22078	22390	24886	17672	19914	21534	18562	14012	10778	7828	7068	5044	8432	6138	4470	6584	3764	20468	88618	7018	6600	6548	7390	5878	9184	5330	4964	4786	5356	5660	4950	6807.33	21240.7	8860.33	21673.7	7103	5174.33	468456
d__Bacteria	k__unclassified_d__Bacteria	p__Actinomycetota	c__Actinomycetes	o__Kitasatosporales	f__Streptomycetaceae	g__Peterkaempfera	340	662	262	474	414	542	510	522	452	484	520	466	812	678	522	354	234	346	890	886	1412	1462	624	416	1274	1282	1500	1014	1418	1632	5334	4774	4886	5722	5892	4376	421.333	487.111	491	948.333	1353.33	5164	53388
d__Bacteria	k__unclassified_d__Bacteria	p__Cyanobacteriota	c__Cyanophyceae	o__Oscillatoriales	f__Microcoleaceae	g__Microcoleus	3878	3236	3060	7634	6622	7788	8108	8504	8392	8060	9148	7972	7850	7314	5236	5384	5350	5382	6042	5346	5040	7116	6340	5752	7500	6928	6940	6450	6086	8350	4928	5002	4718	5362	5630	5202	3391.33	8025.33	6086	5939.33	7042.33	5140.33	227650
d__Bacteria	k__unclassified_d__Bacteria	p__Actinomycetota	c__Actinomycetes	o__Streptosporangiales	f__Streptosporangiaceae	g__Thermobispora	572	708	454	806	742	856	976	1122	1030	1114	1220	1048	1152	1054	726	588	318	528	1022	968	1590	2066	810	532	1526	1624	1718	1394	1890	2012	5364	4798	4624	5636	5948	4422	578	990.444	727.667	1164.67	1694	5132	62958
d__Bacteria	k__unclassified_d__Bacteria	p__Actinomycetota	c__Actinomycetes	o__Pseudonocardiales	f__Pseudonocardiaceae	g__Kibdelosporangium	1772	1108	1142	1792	1706	1884	1938	2080	1788	2092	2006	1884	2406	1870	1650	1376	838	1214	1140	1084	1752	1930	998	986	1830	1918	1876	1506	2028	2086	5518	4794	4724	5530	5758	4452	1340.67	1907.78	1559	1315	1874	5129.33	80456
d__Bacteria	k__unclassified_d__Bacteria	p__Actinomycetota	c__Actinomycetes	o__Geodermatophilales	f__Geodermatophilaceae	g__Petropleomorpha	1106	890	818	1110	886	1196	1268	1318	1176	1344	1400	1264	1920	1420	1230	802	442	726	1142	1018	1728	2058	808	746	1862	1888	1944	1478	2268	2330	5394	4742	4688	5748	5776	4320	938	1218	1090	1250	1961.67	5111.33	70254
d__Bacteria	k__unclassified_d__Bacteria	p__Actinomycetota	c__Actinomycetes	o__Glycomycetales	f__Glycomycetaceae	g__Glycomyces	2128	1378	1612	2128	1926	2384	2420	2442	2238	2344	2418	2310	2568	2080	1618	1484	834	1640	1898	1850	2514	3666	1560	1492	3728	3514	3596	3116	3866	4402	5242	4620	4806	5584	5776	4628	1706	2290	1704	2163.33	3703.67	5109.33	101810
d__Bacteria	k__unclassified_d__Bacteria	p__Pseudomonadota	c__Alphaproteobacteria	o__Rhodobacterales	f__Roseobacteraceae	g__Tranquillimonas	4292	2464	2790	1488	1328	1676	1418	2052	1448	1324	1372	1902	6346	3710	3392	3400	3134	1666	2474	1946	1570	5172	2950	2684	1654	1774	2010	1118	2488	2268	5398	4180	4656	5660	6076	4646	3182	1556.44	3608	2799.33	1885.33	5102.67	103926
d__Bacteria	k__unclassified_d__Bacteria	p__Pseudomonadota	c__Gammaproteobacteria	o__Alteromonadales	f__Psychromonadaceae	g__Psychromonas	2970	2302	2630	5152	4022	4384	3984	3216	4994	3246	4222	3276	4214	5652	4786	4198	11474	3406	2442	2048	2396	1910	2074	1854	6120	5342	5446	13420	6862	12586	5330	5932	5620	4424	4170	5110	2634	4055.11	5621.67	2120.67	8296	5097.67	171214
d__Bacteria	k__unclassified_d__Bacteria	p__Actinomycetota	c__Actinomycetes	o__Micrococcales	f__Intrasporangiaceae	g__Ornithinicoccus	822	688	576	1026	928	1174	1298	1230	1276	1150	1246	1060	1488	1186	944	1146	584	1544	1468	1504	2284	2768	1042	826	2930	2976	3298	2100	2960	3452	5032	4670	4680	5790	6152	4200	695.333	1154.22	1148.67	1648.67	2952.67	5087.33	77498
d__Bacteria	k__unclassified_d__Bacteria	p__Candidatus_Fermentibacteria	c__unclassified_p__Candidatus_Fermentibacteria	o__unclassified_p__Candidatus_Fermentibacteria	f__unclassified_p__Candidatus_Fermentibacteria	g__unclassified_p__Candidatus_Fermentibacteria	5618	4534	4614	4258	3586	4840	5218	5152	5666	5174	5844	5210	5964	5842	4616	5798	7472	4652	5068	4434	5716	4326	4010	3246	12078	9936	10322	20144	11754	19556	5250	5112	5190	4818	4822	5214	4922	4994.22	5724	4466.67	13965	5067.67	235054
d__Bacteria	k__unclassified_d__Bacteria	p__Cyanobacteriota	c__Cyanophyceae	o__Nostocales	f__Calotrichaceae	g__Calothrix	3368	2752	2680	6348	5650	6906	7118	7186	7176	6898	7556	6834	6560	5412	4494	3960	3620	4008	6580	5270	4902	12260	5384	5234	7256	7062	6732	5910	6032	8372	5282	4820	4890	4756	5312	5340	2933.33	6852.44	4675.67	6605	6894	5066.67	209920
d__Bacteria	k__unclassified_d__Bacteria	p__Pseudomonadota	c__Gammaproteobacteria	o__Cellvibrionales	f__Cellvibrionaceae	g__Aestuariicella	3844	2828	2938	5162	6278	9262	7038	10482	5544	4884	4992	6474	4296	3000	2700	2830	2744	4168	4016	3372	4126	5068	4084	3422	13224	14082	14840	9484	11956	11842	5636	5370	5304	4566	4138	5348	3203.33	6679.56	3289.67	4014.67	12571.3	5060.33	219342
d__Bacteria	k__unclassified_d__Bacteria	p__Pseudomonadota	c__Betaproteobacteria	o__Burkholderiales	f__Sphaerotilaceae	g__Azohydromonas	46940	28350	33996	2568	2240	2726	3174	4666	2466	3588	4248	4350	14356	7954	7478	7224	8870	3208	1264	1028	1202	1676	1546	1402	2282	2318	2372	1878	2418	2682	5314	4946	5100	5662	4748	4558	36428.7	3336.22	8181.67	1353	2325	5054.67	240798
d__Bacteria	k__unclassified_d__Bacteria	p__Actinomycetota	c__Actinomycetes	o__Micrococcales	f__Micrococcaceae	g__Pseudarthrobacter	606	986	478	1494	1112	1548	1520	1472	1742	1560	1598	1638	1748	1372	1118	1302	680	1292	996	948	1528	1672	758	624	1652	1718	1810	1338	1602	2038	5510	4582	4686	5642	5666	4188	690	1520.44	1252	1087.67	1693	5045.67	70224
d__Bacteria	k__unclassified_d__Bacteria	p__Actinomycetota	c__Actinomycetes	o__Micrococcales	f__Microbacteriaceae	g__Leucobacter	1330	1076	960	1238	1090	1478	1526	1444	1484	1488	1482	1716	2854	2012	1670	1702	1438	1348	1272	1236	1784	2014	1116	892	2680	2516	2860	2250	2452	3256	5340	4560	4678	5508	5966	4208	1122	1438.44	1837.33	1385.67	2669	5043.33	81924
d__Bacteria	k__unclassified_d__Bacteria	p__Myxococcota	c__Myxococcia	o__Myxococcales	f__Myxococcaceae	g__Pyxidicoccus	5876	4672	4490	8790	7280	8220	8808	12042	7964	10906	10926	9774	8078	8988	11204	6610	5302	8386	3026	2740	3714	3320	4994	4528	6008	4988	4504	13442	8544	12676	5100	4934	4886	5044	5360	4934	5012.67	9412.22	8094.67	3720.33	8360.33	5043	251058
d__Bacteria	k__unclassified_d__Bacteria	p__Thermodesulfobacteriota	c__Deferrisomatia	o__Deferrisomatales	f__Deferrisomataceae	g__Deferrisoma	5356	6712	5300	5454	4886	6648	7350	7682	7858	10896	12668	8900	8922	9182	12166	11112	16854	6572	3758	2862	3464	1848	2918	3224	4634	3912	3962	7300	4970	7392	4972	5176	6140	5330	4370	4268	5789.33	8038	10801.3	3012.33	5361.67	5042.67	235018
d__Bacteria	k__unclassified_d__Bacteria	p__Acidobacteriota	c__Holophagae	o__Holophagales	f__Holophagaceae	g__Holophaga	4502	4330	3952	4492	4220	5982	6258	5750	7502	7016	8596	6570	7564	7114	5066	6492	5808	6380	2446	2408	3240	2054	1978	1774	4994	4458	4598	6546	4472	7116	5116	4866	4516	5296	5554	4760	4261.33	6265.11	6404	2316.67	5364	5018	183786
d__Bacteria	k__unclassified_d__Bacteria	p__Acidobacteriota	c__Terriglobia	o__Candidatus_Acidoferrales	f__unclassified_o__Candidatus_Acidoferrales	g__Candidatus_Acidoferrum	14302	10878	11516	24960	21378	23192	26164	30776	20146	34216	34002	26204	12792	10224	8272	7194	5688	10908	6220	5106	6902	4298	8858	8084	8434	8144	7810	9418	8442	11868	4994	4890	4956	5120	4950	5080	12232	26782	9179.67	6578	9019.33	4998.33	456386
d__Bacteria	k__unclassified_d__Bacteria	p__Actinomycetota	c__Actinomycetes	o__Micromonosporales	f__Micromonosporaceae	g__Actinocatenispora	874	788	678	1588	1406	1546	1698	1740	1582	1912	1712	1652	1708	1488	1212	762	632	866	1478	1398	2210	2646	1124	976	2442	2316	2572	2140	2756	3038	5212	4528	4574	5512	5704	4280	780	1648.44	1111.33	1638.67	2544	4968.33	78750
d__Bacteria	k__unclassified_d__Bacteria	p__Actinomycetota	c__Actinomycetes	o__Streptosporangiales	f__Streptosporangiaceae	g__Microtetraspora	1228	1340	858	1996	1606	1904	2056	2158	1680	1982	2038	2052	2220	1808	1292	1006	504	988	1192	1066	1716	1948	1182	830	2344	2172	2400	1738	2236	2496	5170	4642	4472	5600	5562	4328	1142	1941.33	1303	1322.33	2231	4962.33	79810
d__Bacteria	k__unclassified_d__Bacteria	p__Pseudomonadota	c__Betaproteobacteria	o__Rhodocyclales	f__Zoogloeaceae	g__Azoarcus	11496	30606	8458	5282	4986	5076	5198	5906	4284	5348	5680	4940	8886	5628	5306	21876	33346	4194	1852	1570	2288	2248	2912	2432	3934	3686	3618	3328	3206	4502	5242	4704	4736	5294	4850	4904	16853.3	5188.89	13206	2217	3712.33	4955	241802
d__Bacteria	k__unclassified_d__Bacteria	p__Pseudomonadota	c__Gammaproteobacteria	o__Oceanospirillales	f__Oceanospirillaceae	g__Motiliproteus	4806	3892	3688	4884	4532	5084	5316	6036	5052	5036	5032	5120	3698	3132	2876	2552	2724	2268	4900	3874	5030	5282	5952	6184	9370	9128	9298	6772	7988	9210	5420	5584	5122	4428	4198	4930	4128.67	5121.33	2875	5203.67	8627.67	4947	188398
d__Bacteria	k__unclassified_d__Bacteria	p__Thermodesulfobacteriota	c__Syntrophia	o__Syntrophales	f__Smithellaceae	g__Smithella	8852	6694	8074	7308	6708	9096	10232	9216	12416	11056	13982	10294	10156	8552	7166	15820	28924	10710	9172	6858	7858	3210	4742	2840	8884	7844	7488	18874	9788	18126	4772	5174	4584	4982	4878	5236	7873.33	10034.2	13554.7	5780	11834	4937.67	330566
d__Bacteria	k__unclassified_d__Bacteria	p__candidate_division_NC10	c__unclassified_p__candidate_division_NC10	o__unclassified_p__candidate_division_NC10	f__unclassified_p__candidate_division_NC10	g__Candidatus_Methylomirabilis	9646	7222	8116	13298	11978	14540	16330	18178	14696	21032	22834	17378	9304	8956	6582	6832	5766	11294	5964	4900	6298	3458	5864	5022	7284	6212	6388	10516	7068	11716	4824	4808	4730	4946	5140	5154	8328	16696	8122.33	5251	8197.33	4933.67	334274
d__Bacteria	k__unclassified_d__Bacteria	p__Thermodesulfobacteriota	c__Desulfobulbia	o__Desulfobulbales	f__Desulfobulbaceae	g__Desulfurivibrio	8190	7226	9160	10950	10612	15920	15400	9946	22396	11236	16866	11544	9980	11224	15174	5202	4184	8948	15846	20732	20168	4590	7202	5564	6952	6466	6374	12114	7066	12968	5146	5282	5032	4660	4532	4942	8192	13874.4	9118.67	12350.3	8656.67	4932.33	359794
d__Bacteria	k__unclassified_d__Bacteria	p__Pseudomonadota	c__Betaproteobacteria	o__Burkholderiales	f__Sphaerotilaceae	g__Caldimonas	30094	17972	21704	3326	2612	3152	3246	4256	2678	3640	4072	3834	18644	10482	9414	4944	4720	3070	1252	998	1226	1548	1720	1320	1894	1840	1664	1694	1768	2256	5112	4940	4838	5470	4630	4564	23256.7	3424	8545.67	1344	1852.67	4925.67	200594
d__Bacteria	k__unclassified_d__Bacteria	p__Bacillota	c__Bacilli	o__Lactobacillales	f__Streptococcaceae	g__Streptococcus	2284	1632	1824	1836	1606	1884	1654	1898	1894	1676	1700	1888	1982	1494	1244	1402	1406	1672	1264	1268	1354	1600	1470	2022	1690	1590	1804	1658	1652	2230	3060	2604	2924	3362	14638	2894	1913.33	1781.78	1533.33	1496.33	1770.67	4913.67	80060
d__Bacteria	k__unclassified_d__Bacteria	p__Pseudomonadota	c__Alphaproteobacteria	o__Rhodobacterales	f__Paracoccaceae	g__Sedimentitalea	3716	14362	3078	4624	4014	4902	4664	5426	4634	4428	4730	4796	5578	3222	2838	3452	4054	2606	3372	2766	3186	4658	4092	3882	3910	3796	3982	2588	4046	4000	5196	4354	4748	4962	5502	4704	7052	4690.89	3625	3659.33	3720.33	4911	158868
d__Bacteria	k__unclassified_d__Bacteria	p__Pseudomonadota	c__Alphaproteobacteria	o__Hyphomicrobiales	f__Rhizobiaceae	g__Flavimaribacter	3018	2298	2480	32756	29778	37974	32412	38942	35362	29470	31934	36694	21830	13630	10478	6292	2288	9338	4592	4014	4636	5066	5552	4062	28886	30852	32122	18878	26092	32164	4774	4210	4522	5090	6054	4716	2598.67	33924.7	10642.7	4653.67	28165.7	4894.33	603256
d__Bacteria	k__unclassified_d__Bacteria	p__Actinomycetota	c__Actinomycetes	o__Catenulisporales	f__Actinospicaceae	g__Actinocrinis	334	532	270	308	294	304	376	394	326	302	408	396	504	498	366	200	132	198	596	576	998	1240	346	228	1098	1142	1198	786	1026	1194	5210	4434	4668	5306	5658	4086	378.667	345.333	316.333	664	1074	4893.67	45932
d__Bacteria	k__unclassified_d__Bacteria	p__Pseudomonadota	c__Gammaproteobacteria	o__Cellvibrionales	f__Cellvibrionaceae	g__Exilibacterium	3874	2890	2818	4212	4768	5444	5774	11852	2916	2780	3038	3998	4216	3508	3234	2784	2798	2910	4218	3510	4396	7494	4858	5126	6230	6058	6210	4842	6868	6678	5512	5248	5320	4234	3780	5252	3194	4975.78	3241.67	4933.67	6147.67	4891	169648
d__Bacteria	k__unclassified_d__Bacteria	p__Pseudomonadota	c__Alphaproteobacteria	o__Hyphomicrobiales	f__Blastochloridaceae	g__Blastochloris	3058	2830	2494	6944	5686	6994	7358	8458	7068	6888	7558	7294	8628	6580	5580	5574	4858	4658	3538	3326	4124	3562	2840	2668	5160	4480	4438	4294	4012	5656	4846	4540	4484	5410	5214	4850	2794	7138.67	5979.67	3343	4673.33	4890.67	185950
d__Bacteria	k__unclassified_d__Bacteria	p__Thermodesulfobacteriota	c__Desulfobacteria	o__Desulfobacterales	f__Desulfolunaceae	g__Desulfoluna	7026	5234	5816	3796	3516	4876	5246	4846	7542	4424	6412	4638	4886	4820	4204	3856	5632	3416	5978	5188	4970	2994	3542	2474	10674	9414	9698	12476	8934	15116	4978	4782	4556	4936	4890	5142	6025.33	5032.89	4469	4191	11052	4880.67	210928
d__Bacteria	k__unclassified_d__Bacteria	p__Spirochaetota	c__Spirochaetia	o__Spirochaetales	f__Treponemataceae	g__Treponema	4982	4406	4426	5262	5038	6440	6478	6294	7926	6904	8178	6762	7012	7202	4998	7066	8412	6682	4594	3998	4870	3370	2628	2104	7810	6996	7260	28998	11866	19590	4874	4856	4534	5084	5024	4910	4604.67	6586.89	6895.33	3594	13753.3	4880.33	247834
d__Bacteria	k__unclassified_d__Bacteria	p__Pseudomonadota	c__Alphaproteobacteria	o__Rhodospirillales	f__Acetobacteraceae	g__Neoroseomonas	4416	3306	3032	4270	3272	3992	4524	7270	3498	4282	4162	5352	14930	8750	6872	2914	2854	2210	1876	1682	2004	2020	2108	1788	2104	2178	2172	1764	2282	2478	5364	4722	4748	5484	4676	4204	3584.67	4513.56	6421.67	1913	2163	4866.33	143560
d__Bacteria	k__unclassified_d__Bacteria	p__Pseudomonadota	c__Alphaproteobacteria	o__Caulobacterales	f__Caulobacteraceae	g__Brevundimonas	4910	3770	3866	5756	4948	5822	5594	7078	5006	5624	5816	5778	7446	5414	4956	5188	4922	4090	2998	2488	3076	4540	3922	3634	4344	4144	4158	4412	5322	5376	5124	4446	4564	5044	5276	4660	4182	5713.56	5336	3443	4626	4852.33	173512
d__Bacteria	k__unclassified_d__Bacteria	p__Bacteroidota	c__Bacteroidia	o__Bacteroidales	f__Porphyromonadaceae	g__Microbacter	1528	1804	1506	19976	34710	53366	27094	26616	39070	34700	23228	62754	38674	10510	19744	18770	1774	35502	2670	2714	3404	4812	2348	1584	16882	19674	20886	14964	13724	23266	4956	4380	4436	5210	5816	4298	1612.67	35723.8	20829	2922	18232.7	4849.33	607350
d__Bacteria	k__unclassified_d__Bacteria	p__Pseudomonadota	c__Alphaproteobacteria	o__Rhodobacterales	f__Paracoccaceae	g__Kangsaoukella	18352	8032	12624	1242	1270	1528	1522	2054	1576	1398	1330	2152	7604	3618	3636	4014	3512	2318	20090	11844	11056	56436	13948	15212	7582	7056	8808	4648	12790	11146	5164	4128	4474	5090	5584	4640	13002.7	1563.56	4117	21431	8671.67	4846.67	287478
d__Bacteria	k__unclassified_d__Bacteria	p__Thermodesulfobacteriota	c__Desulfuromonadia	o__Desulfuromonadales	f__Geoalkalibacteraceae	g__Geoalkalibacter	4714	8392	4666	6586	5652	7092	7466	7304	9182	9926	11530	7882	5604	5036	4268	5192	7818	6130	4640	3754	4186	3060	3566	3750	5356	4820	4816	7448	6020	7680	5178	5000	4918	4818	4392	4744	5924	8068.89	5674.67	3826	6023.33	4841.67	212586
d__Bacteria	k__unclassified_d__Bacteria	p__Cyanobacteriota	c__Cyanophyceae	o__Oscillatoriales	f__Oscillatoriaceae	g__Moorena	2948	2798	2492	6218	5308	6404	6160	6986	6476	6132	6724	5618	6882	5970	4690	4182	3720	3752	7218	6326	5378	13342	6276	6562	7254	6460	6776	6024	5896	8228	4990	4696	4668	4830	4892	4912	2746	6225.11	4866	7517	6773	4831.33	208188
d__Bacteria	k__unclassified_d__Bacteria	p__Actinomycetota	c__Actinomycetes	o__Streptosporangiales	f__Streptosporangiaceae	g__Thermopolyspora	932	598	672	806	704	940	954	940	938	1078	1082	854	1096	968	636	400	248	424	892	926	1704	2226	834	716	1542	1508	1606	1148	1660	1828	5054	4624	4452	5288	5394	4150	734	921.778	628.667	1216.33	1548.67	4827	59822
d__Bacteria	k__unclassified_d__Bacteria	p__Pseudomonadota	c__Alphaproteobacteria	o__Hyphomicrobiales	f__Alsobacteraceae	g__Alsobacter	2654	2484	2020	4270	3680	4006	4212	5360	3694	3944	4158	3944	10960	7388	5920	4164	4394	3236	1964	1778	2224	2430	2276	1780	2240	2090	2156	1868	2574	2684	4924	4480	4332	5228	5452	4408	2386	4140.89	6010.33	2075.33	2268.67	4804	135376
d__Bacteria	k__unclassified_d__Bacteria	p__Pseudomonadota	c__Alphaproteobacteria	o__Kordiimonadales	f__Kordiimonadaceae	g__Kordiimonas	7406	6414	5564	5928	4828	5682	5912	6620	5212	5528	5974	5096	6636	5088	4664	5534	5900	3850	7044	4990	6976	10120	11484	9152	6696	6804	6810	6820	8900	8676	5394	5086	5412	3986	3894	4866	6461.33	5642.22	5278.67	8294.33	7451	4773	224946
d__Bacteria	k__unclassified_d__Bacteria	p__Thermodesulfobacteriota	c__Desulfuromonadia	o__Desulfuromonadales	f__Geopsychrobacteraceae	g__Desulfuromusa	5524	12858	5238	5652	5032	6488	6098	5214	10588	6242	8062	6034	4492	4414	3582	4310	6966	3898	6044	4706	5500	3452	4934	4494	8452	8048	8214	11002	9066	12234	5250	5154	5372	4136	3602	5088	7873.33	6601.11	4610.33	4855	9502.67	4767	225440
d__Bacteria	k__unclassified_d__Bacteria	p__Candidatus_Sumerlaeota	c__Candidatus_Sumerlaeia	o__unclassified_c__Candidatus_Sumerlaeia	f__unclassified_c__Candidatus_Sumerlaeia	g__unclassified_c__Candidatus_Sumerlaeia	3638	3300	3170	5652	4316	5318	5822	6708	5882	6598	7006	5888	6610	6236	4718	4408	4922	3810	3742	3472	4282	3130	3250	2706	5878	4940	4990	9492	7462	10442	4758	4682	4758	4846	4646	4870	3369.33	5910	5117.33	3430.33	7200.67	4760	186348
d__Bacteria	k__unclassified_d__Bacteria	p__Pseudomonadota	c__Alphaproteobacteria	o__Hyphomicrobiales	f__Nitrobacteraceae	g__Rhodopseudomonas	4634	3954	4000	23668	20526	23540	26662	35398	19896	34112	32422	27032	10892	8156	6042	5456	4382	6924	2920	2438	3144	3212	3608	2852	4004	3802	3970	3476	4254	5202	4828	4524	4422	4992	5190	4568	4196	27028.4	6975.33	3029	4118	4754	369102
d__Bacteria	k__unclassified_d__Bacteria	p__Pseudomonadota	c__Alphaproteobacteria	o__Rhodobacterales	f__Roseobacteraceae	g__Salipiger	6540	4926	5970	5816	5906	8072	6182	8128	7006	6198	5916	8486	8634	4658	8056	5562	5020	6206	5054	3864	3548	7996	5928	5280	7884	8508	9388	5152	7574	8342	4766	4080	4388	4902	5792	4482	5812	6856.67	6356	5278.33	7808	4735	224210
d__Bacteria	k__unclassified_d__Bacteria	p__Pseudomonadota	c__Alphaproteobacteria	o__Rhodobacterales	f__Paracoccaceae	g__Frigidibacter	18320	6318	8358	1914	1640	2060	1816	2414	1922	2314	1964	2914	8412	4806	4044	5868	5388	4054	1688	1236	1290	2530	1920	1858	1526	1472	1778	1008	1812	1924	4726	3764	3920	5704	6294	3980	10998.7	2106.44	5428.67	1753.67	1586.67	4731.33	132956
d__Bacteria	k__unclassified_d__Bacteria	p__Planctomycetota	c__Planctomycetia	o__Pirellulales	f__Lacipirellulaceae	g__Botrimarina	1820	2206	2190	19140	13916	15100	15188	21294	12390	15814	16516	15702	11638	8062	5774	5830	4448	5322	2080	1830	2522	3086	2152	2188	3532	3212	3564	3464	4552	5460	4726	4352	4494	4862	4898	5026	2072	16117.8	6845.67	2309.67	3964	4726.33	258350
d__Bacteria	k__unclassified_d__Bacteria	p__Actinomycetota	c__Actinomycetes	o__Micromonosporales	f__Micromonosporaceae	g__Plantactinospora	952	840	694	2386	2146	2430	2120	2328	2162	2844	2788	2648	1710	1460	1214	1044	682	1164	1178	1200	1734	2174	998	862	1792	1712	1932	1388	1870	2176	4904	4386	4292	5118	5478	4142	828.667	2428	1212.33	1357.67	1811.67	4720	78948
d__Bacteria	k__unclassified_d__Bacteria	p__Pseudomonadota	c__Alphaproteobacteria	o__Rhodospirillales	f__Thalassobaculaceae	g__Thalassobaculum	3126	2838	2574	16528	13834	14244	13912	16278	10454	10966	10996	10314	8258	6428	4974	4078	2848	4600	6628	5576	7130	8190	10210	8896	6530	6488	6646	5062	7496	7826	4724	4418	4474	4768	5158	4756	2846	13058.4	5197.67	7771.67	6674.67	4716.33	272226
d__Bacteria	k__unclassified_d__Bacteria	p__Bacteroidota	c__Cytophagia	o__Cytophagales	f__Hymenobacteraceae	g__Pontibacter	7378	4248	5446	4362	4010	5096	5110	5834	5270	5282	5424	4824	9100	6706	5748	8802	13596	6354	4002	3478	4248	3932	3834	2822	9850	8762	8936	15216	11468	15882	4970	4720	4982	4382	4348	4826	5690.67	5023.56	8384.33	3719.33	11685.7	4704.67	233248
d__Bacteria	k__unclassified_d__Bacteria	p__Myxococcota	c__Myxococcia	o__Myxococcales	f__unclassified_o__Myxococcales	g__Paraliomyxa	9038	11072	10004	16166	16254	15410	14044	16208	11176	22110	18264	17860	45824	213636	192602	118044	9186	198310	3332	3034	3756	3750	13284	7324	5120	3426	3424	16396	9420	14958	4452	4048	4122	4666	5472	5392	10038	16388	129600	5746.67	8790.67	4692	1070584
d__Bacteria	k__unclassified_d__Bacteria	p__Pseudomonadota	c__Alphaproteobacteria	o__Hyphomicrobiales	f__Rhodobiaceae	g__Rhodobium	2336	2102	2008	10424	8328	9284	9776	11342	8190	8934	9598	8618	6740	4534	3330	4486	3214	4240	2946	2364	3342	3240	4524	3550	4272	3806	4102	2990	4160	4548	4516	4186	4294	5212	5486	4420	2148.67	9388.22	4424	3327.67	3979.67	4685.67	189442
d__Bacteria	k__unclassified_d__Bacteria	p__Candidatus_Gracilibacteria	c__unclassified_p__Candidatus_Gracilibacteria	o__unclassified_p__Candidatus_Gracilibacteria	f__unclassified_p__Candidatus_Gracilibacteria	g__unclassified_p__Candidatus_Gracilibacteria	3018	2340	2348	4876	4248	5344	5504	5188	6492	4734	5642	5028	7274	6186	4414	4854	4214	4140	3474	3282	4114	4080	2078	1904	6064	5302	5398	6826	4612	10332	4642	4496	4398	4882	4782	4794	2568.67	5228.44	5180.33	3155.33	6422.33	4665.67	171304
d__Bacteria	k__unclassified_d__Bacteria	p__Actinomycetota	c__Actinomycetes	o__Frankiales	f__Frankiaceae	g__Protofrankia	1354	1164	1016	1434	1340	1646	1630	1764	1364	1432	1458	1436	1238	1084	1046	698	346	814	1370	1466	2182	2316	972	946	2024	2118	2188	1592	2024	2404	4750	4428	4398	4914	5346	4112	1178	1500.44	871	1542	2058.33	4658	71814
d__Bacteria	k__unclassified_d__Bacteria	p__Gemmatimonadota	c__Gemmatimonadetes	o__Gemmatimonadales	f__Gemmatimonadaceae	g__Roseisolibacter	13238	6842	9078	9008	7506	8138	8342	9154	6706	10702	11048	8434	7090	7064	5052	5252	3930	5406	4482	3864	4764	4116	7054	4464	10774	9764	9648	16048	13986	16572	4904	4588	4746	4470	4668	4532	9719.33	8782	5632.33	4790.67	12798.7	4651.33	275434
d__Archaea	k__unclassified_d__Archaea	p__Euryarchaeota	c__Methanobacteria	o__Methanobacteriales	f__Methanobacteriaceae	g__unclassified_f__Methanobacteriaceae	1076	932	916	516	456	578	634	542	906	496	648	610	1180	1056	700	730	610	764	504	572	646	526	266	202	908	852	830	882	692	1342	4088	3920	3930	6268	4646	4996	974.667	598.444	840	452.667	917.667	4641.33	49420
d__Bacteria	k__unclassified_d__Bacteria	p__Pseudomonadota	c__Alphaproteobacteria	o__Rhodospirillales	f__Azospirillaceae	g__Skermanella	4300	3198	3178	21042	17656	17110	16022	19766	11726	12172	12318	10658	9304	8252	6020	4232	3486	5226	5400	4386	6072	6588	11406	9170	6018	5870	5906	5726	6372	7618	4772	4672	4510	4612	4776	4464	3558.67	15385.6	6086.67	7170.33	6251.67	4634.33	294004
d__Bacteria	k__unclassified_d__Bacteria	p__Pseudomonadota	c__Gammaproteobacteria	o__Xanthomonadales	f__Rhodanobacteraceae	g__Dyella	6130	4490	4482	4376	3918	4392	4524	5682	4018	4734	5476	4590	9104	6530	5340	5824	6452	4228	2960	2394	3050	4344	4812	3688	4438	3900	4070	4234	5268	5590	4880	4690	4664	4696	4246	4406	5034	4634.44	6246.33	3541.33	4583.33	4597	170620
d__Bacteria	k__unclassified_d__Bacteria	p__Actinomycetota	c__Actinomycetes	o__Micrococcales	f__Sanguibacteraceae	g__Sanguibacter	370	638	344	668	534	740	734	696	846	542	580	650	882	720	570	514	342	488	972	828	1454	1806	568	482	1504	1612	1692	1146	1648	1836	4876	4166	4166	4938	5338	3980	450.667	665.556	586	1018.33	1573	4577.33	53870
d__Bacteria	k__unclassified_d__Bacteria	p__Planctomycetota	c__Planctomycetia	o__Pirellulales	f__Lacipirellulaceae	g__Adhaeretor	2176	2636	2486	25580	18668	22042	23164	31440	20320	21566	22332	20438	11404	7810	5716	5452	4774	4886	3054	3042	3984	4032	3722	3762	5218	4966	5394	4696	6540	8170	4632	4254	4114	4574	4716	5138	2432.67	22838.9	6673.67	3599.33	5830.67	4571.33	336898
d__Bacteria	k__unclassified_d__Bacteria	p__Thermodesulfobacteriota	c__Desulfobacteria	o__Desulfobacterales	f__Desulfatibacillaceae	g__Desulfatibacillum	3388	2996	3304	4102	3764	5668	6574	5588	8420	5096	6822	5254	4994	4776	3924	3746	5924	3826	7824	6198	6536	2888	4354	2470	9908	8778	8682	19698	11708	18600	4508	4672	4062	4812	4438	4876	3229.33	5698.67	4531.67	5045	12895.7	4561.33	223178
d__Bacteria	k__unclassified_d__Bacteria	p__Planctomycetota	c__Planctomycetia	o__Planctomycetales	f__Planctomycetaceae	g__Thalassoglobus	1822	2884	1538	10496	7360	9036	8180	12638	6518	5776	5950	5646	8250	5920	4898	6294	6206	4552	2964	2822	4036	4556	4812	4030	4684	3980	4518	4458	5436	6538	4384	3946	4296	4530	5150	4964	2081.33	7955.56	6020	3870	4935.67	4545	194068
d__Bacteria	k__unclassified_d__Bacteria	p__Actinomycetota	c__Candidatus_Geothermincolia	o__Candidatus_Geothermincolales	f__Candidatus_Geothermincolaceae	g__Candidatus_Solincola	10286	7084	7916	3726	3294	4566	5432	4934	5950	5662	6754	5494	4216	4088	3050	3160	2666	3244	2268	2022	2752	2604	1902	1728	7670	7372	6858	5140	3758	7348	4468	4178	4146	4830	5016	4558	8428.67	5090.22	3404	2212.67	6357.67	4532.67	170140
d__Bacteria	k__unclassified_d__Bacteria	p__Cyanobacteriota	c__Cyanophyceae	o__Coleofasciculales	f__Coleofasciculaceae	g__Coleofasciculus	3370	2692	2572	5982	5422	6554	6632	7022	7406	6604	7448	6334	6998	5664	4460	4218	4220	4074	5156	4428	4810	7224	4822	4656	6518	5742	5538	5710	4878	7270	4700	4316	4168	4820	4534	4554	2878	6600.44	4939	5182.67	5942.67	4515.33	191516
d__Bacteria	k__unclassified_d__Bacteria	p__Deinococcota	c__Deinococci	o__Thermales	f__Thermaceae	g__Calidithermus	3838	2762	3148	4056	3500	4296	4342	4264	4932	4498	5236	4722	6904	6046	4378	4774	3776	3912	2622	2514	2996	3774	2098	2040	4432	4110	4380	3722	4184	4986	4582	4368	4274	4660	4912	4292	3249.33	4427.33	4965	2674	4302.33	4514.67	148330
d__Bacteria	k__unclassified_d__Bacteria	p__Pseudomonadota	c__Gammaproteobacteria	o__Chromatiales	f__Ectothiorhodospiraceae	g__Nitrococcus	4400	3162	3190	5982	5198	5938	5910	6740	5420	5726	5788	5288	4792	3816	3594	2976	3016	2470	4396	3692	4716	5396	5868	5660	7884	7632	7596	5602	6650	7514	4778	4688	4602	4312	4080	4612	3584	5776.67	3444	4954.67	7146.33	4512	183084
d__Bacteria	k__unclassified_d__Bacteria	p__Thermodesulfobacteriota	c__Desulfobulbia	o__Desulfobulbales	f__Desulfobulbaceae	g__Desulfogranum	2612	2532	2206	6434	5878	8928	8906	7208	15226	7088	8972	7676	4518	5284	6484	2614	3152	3398	7220	6050	6640	7228	4798	4404	15182	16128	16846	13596	13700	21124	4564	4350	4232	4736	4412	4732	2450	8479.56	4241.67	6056.67	16096	4504.33	269058
d__Bacteria	k__unclassified_d__Bacteria	p__Pseudomonadota	c__Alphaproteobacteria	o__Rhodobacterales	f__Roseobacteraceae	g__Roseivivax	6534	4108	4396	3238	2862	3476	3548	4398	3396	3188	3216	4148	6250	3286	3464	3868	3670	3040	11500	6498	4394	33724	9202	11500	3544	3758	4022	2520	4296	4238	4660	3754	4354	4620	5298	4238	5012.67	3496.67	3929.67	12803	3729.67	4487.33	196206
d__Bacteria	k__unclassified_d__Bacteria	p__Actinomycetota	c__Actinomycetes	o__Micrococcales	f__Microbacteriaceae	g__Salinibacterium	1500	1556	1104	3248	2672	2976	2510	2766	2416	3344	2884	3040	2722	2152	1736	1654	1504	1564	1472	1500	2004	2618	1574	1212	2784	2814	3122	2436	3120	3444	4668	4124	4066	4740	5346	3966	1386.67	2872.89	1888.67	1730	2953.33	4485	96358
d__Bacteria	k__unclassified_d__Bacteria	p__Pseudomonadota	c__Alphaproteobacteria	o__Hyphomicrobiales	f__Chelatococcaceae	g__Chelatococcus	3582	3040	2814	10542	8476	9324	9510	11412	7496	9336	9462	8430	16030	10802	8648	5814	6242	4988	2488	2172	2674	2726	3380	2504	3248	3188	3180	2732	3522	3934	4500	4102	4100	4888	5054	4214	3145.33	9332	8754	2657.33	3300.67	4476.33	208554
d__Bacteria	k__unclassified_d__Bacteria	p__Pseudomonadota	c__Alphaproteobacteria	o__Rhodobacterales	f__Roseobacteraceae	g__Leisingera	4302	2960	3478	4958	4058	4966	4890	6156	4360	4784	4840	5204	5536	3422	3172	3446	2988	2768	3722	2828	3304	5142	5894	5276	3554	3190	3500	2428	3980	3710	4636	3822	4242	4538	5024	4438	3580	4912.89	3555.33	4361	3393.67	4450	149516
d__Bacteria	k__unclassified_d__Bacteria	p__Pseudomonadota	c__Gammaproteobacteria	o__Methylococcales	f__Methylococcaceae	g__Methyloprofundus	4020	3152	3344	4636	4020	4952	5348	5766	5486	4712	5266	4906	3646	3126	2682	2486	2876	2468	4430	3760	4632	4292	4190	3778	12166	12728	13074	8492	8784	11320	4792	4512	4392	4154	4172	4646	3505.33	5010.22	2880.67	4180.33	11094	4444.67	191206
d__Bacteria	k__unclassified_d__Bacteria	p__Pseudomonadota	c__Alphaproteobacteria	o__Hyphomicrobiales	f__Nitrobacteraceae	g__Afipia	4996	4188	3964	12460	10612	11774	12544	15256	9944	13730	13718	11852	8958	6388	5194	5306	3610	5622	2812	2294	2772	2560	3874	2948	3544	3232	3078	2740	3442	4222	4346	4170	4176	4900	4696	4286	4382.67	12432.2	5846.33	2876.67	3376.33	4429	224208
d__Bacteria	k__unclassified_d__Bacteria	p__Actinomycetota	c__unclassified_p__Actinomycetota	o__Candidatus_Hakubellales	f__Candidatus_Hakubellaceae	g__Candidatus_Hakubella	5472	4606	4772	4032	3702	5046	5376	5118	6018	5784	6746	5482	5238	5330	3582	3796	2966	3814	3304	3128	3824	3032	2250	2208	5372	4612	5014	6016	4148	6970	4418	4236	3966	4778	4836	4296	4950	5256	4121	2957.67	5355.33	4421.67	163288
d__Bacteria	k__unclassified_d__Bacteria	p__Actinomycetota	c__Actinomycetes	o__Streptosporangiales	f__Streptosporangiaceae	g__Bailinhaonella	1120	740	906	868	738	786	876	934	800	970	922	824	938	894	648	322	254	324	948	1148	1618	1846	718	596	1730	1568	1776	1144	1656	1958	4512	4202	4138	4686	5182	3792	922	857.556	563.333	1145.67	1638.67	4418.67	57082
d__Bacteria	k__unclassified_d__Bacteria	p__Pseudomonadota	c__Gammaproteobacteria	o__Enterobacterales	f__Enterobacteriaceae	g__Salmonella	2194	1862	2500	2352	2152	2460	2560	2778	2122	2254	2344	2458	2984	2298	1960	2348	2776	2118	1444	1338	1614	1800	1980	2826	2696	2706	2876	2256	2568	3018	3784	3322	3740	4266	7292	4044	2185.33	2386.67	2414	1833.67	2686.67	4408	96090
d__Bacteria	k__unclassified_d__Bacteria	p__Pseudomonadota	c__Gammaproteobacteria	o__Aeromonadales	f__Aeromonadaceae	g__Aeromonas	3108	2824	2370	2370	2118	2824	2616	2948	2592	2418	2766	2438	4434	3136	2740	3140	3650	2622	2606	2192	2666	3296	2598	2482	4496	4248	4560	3798	4498	4956	4574	4326	4310	4324	4440	4330	2767.33	2565.56	3287	2640	4426	4384	119814
d__Bacteria	k__unclassified_d__Bacteria	p__Pseudomonadota	c__Gammaproteobacteria	o__Chromatiales	f__Granulosicoccaceae	g__Granulosicoccus	5458	4114	4526	8362	7046	7398	7794	8888	6656	6480	6574	6352	5912	4336	3580	3738	3214	3648	6582	5450	6138	11520	10956	14548	9594	8990	9288	6676	8562	9212	4492	4382	4314	4128	4514	4454	4699.33	7283.33	4071.33	9199	8720.33	4380.67	237876
d__Bacteria	k__unclassified_d__Bacteria	p__Pseudomonadota	c__Gammaproteobacteria	o__Xanthomonadales	f__Xanthomonadaceae	g__Stenotrophomonas	4060	2980	3174	3086	2454	3024	3104	3550	2744	3002	3364	3070	5352	3654	3328	3762	4340	3144	2508	1944	2738	3238	3140	3048	4358	4204	4248	4704	5082	5610	4676	4446	4282	4424	4366	4038	3404.67	3044.22	3930	2769.33	4701	4372	132246
d__Bacteria	k__unclassified_d__Bacteria	p__Pseudomonadota	c__Alphaproteobacteria	o__Rhodobacterales	f__Roseobacteraceae	g__Pseudoruegeria	5150	3146	3696	3762	3356	4150	3626	4648	3706	3198	3390	4330	5808	3184	3366	2716	2674	1990	3382	2514	2422	5680	3612	3390	2978	3226	3274	2054	3714	3252	4418	3770	3882	4844	5152	4086	3997.33	3796.22	3289.67	3500	3083	4358.67	131546
d__Archaea	k__unclassified_d__Archaea	p__Euryarchaeota	c__Methanomicrobia	o__Methanomicrobiales	f__unclassified_o__Methanomicrobiales	g__unclassified_o__Methanomicrobiales	12208	7822	10086	4976	4294	5706	6228	5924	6998	5736	7130	5534	7880	8062	5482	8264	8256	7186	3616	3078	3796	2484	2326	1586	7062	6434	6428	7670	5680	9798	4232	4144	4032	4604	4566	4572	10038.7	5836.22	7521.67	2814.33	7178.67	4358.33	213880
d__Bacteria	k__unclassified_d__Bacteria	p__Pseudomonadota	c__Alphaproteobacteria	o__Rhodobacterales	f__Roseobacteraceae	g__Thalassovita	7288	4546	5838	3138	2762	3606	3648	4360	3850	3132	3402	4002	5758	3728	3182	4524	4496	3572	3108	2488	2584	5346	3660	3448	4380	3944	4526	3916	4878	5138	4606	3702	4126	4642	4922	4108	5890.67	3544.44	4210	3439	4463.67	4351	148354
d__Bacteria	k__unclassified_d__Bacteria	p__Actinomycetota	c__Actinomycetes	o__Kitasatosporales	f__Streptomycetaceae	g__Streptantibioticus	426	708	356	676	630	686	702	682	618	810	710	678	872	808	452	382	358	310	918	932	1506	1678	710	524	1140	1218	1366	1044	1410	1588	4606	3966	4054	4792	4914	3714	496.667	688	530.333	1044.67	1294.33	4341	50944
d__Bacteria	k__unclassified_d__Bacteria	p__Pseudomonadota	c__Gammaproteobacteria	o__Alteromonadales	f__Alteromonadaceae	g__Alteromonas	5488	4358	4378	4554	5000	8144	5424	6392	5196	4326	4532	4872	5252	3946	3708	11752	12906	15406	6498	4924	6672	8566	7156	7112	11172	12098	12268	8960	11892	11762	4978	4298	4570	3872	3738	4578	4741.33	5382.22	8828.33	6821.33	11358.7	4339	250748
d__Bacteria	k__unclassified_d__Bacteria	p__Pseudomonadota	c__Gammaproteobacteria	o__Alteromonadales	f__Colwelliaceae	g__Colwellia	7946	6202	5838	4758	4508	5848	6024	6144	5834	4774	5438	4964	6390	4708	4270	4962	5816	3874	5686	4422	6510	6926	6458	6380	8376	8560	8574	7792	9060	9854	4756	4288	4638	4050	3924	4370	6662	5365.78	5003.33	6063.67	8702.67	4337.67	212922
d__Bacteria	k__unclassified_d__Bacteria	p__Pseudomonadota	c__Alphaproteobacteria	o__Hyphomicrobiales	f__Rhizobiaceae	g__Ensifer	2480	2044	2176	7636	6560	7224	7188	8960	6162	6882	6978	6796	5888	3974	4142	3194	2364	2818	2944	2534	3460	3454	3708	3096	5500	5656	5598	3864	4912	5644	4266	3788	4214	4576	4854	4212	2233.33	7154	3730	3199.33	5195.67	4318.33	169746
d__Archaea	k__unclassified_d__Archaea	p__Nanoarchaeota	c__unclassified_p__Nanoarchaeota	o__unclassified_p__Nanoarchaeota	f__unclassified_p__Nanoarchaeota	g__unclassified_p__Nanoarchaeota	6378	5194	5868	5850	5766	8190	8698	8452	9764	7824	9824	7940	7538	7374	4884	6034	6318	6866	5690	4876	5944	2504	3196	2544	7236	6430	6246	14138	6732	13740	4204	4318	3980	4376	4596	4392	5813.33	8034.22	6502.33	4125.67	9087	4311	233904
d__Bacteria	k__unclassified_d__Bacteria	p__Candidatus_Uhrbacteria	c__unclassified_p__Candidatus_Uhrbacteria	o__unclassified_p__Candidatus_Uhrbacteria	f__unclassified_p__Candidatus_Uhrbacteria	g__unclassified_p__Candidatus_Uhrbacteria	3540	3298	2896	4502	3868	4618	4858	5032	4752	5252	5848	4670	5814	5212	4568	4602	5072	3750	2748	2562	3614	2286	4834	3076	5204	4384	4544	8026	10126	9388	4282	4136	4116	4402	4594	4286	3244.67	4822.22	4836.33	3186.67	6945.33	4302.67	168760
d__Bacteria	k__unclassified_d__Bacteria	p__Pseudomonadota	c__Alphaproteobacteria	o__Hyphomicrobiales	f__Hyphomicrobiaceae	g__Dichotomicrobium	2546	2434	1928	16802	13408	14332	14554	16890	12216	13044	12700	10920	9960	6510	4272	4462	3010	5560	5574	4644	5836	6180	6004	4750	6562	6190	6512	4772	6714	7466	4270	4046	4004	4332	4750	4400	2302.67	13874	5629	5498	6369.33	4300.33	262554
d__Bacteria	k__unclassified_d__Bacteria	p__Actinomycetota	c__Actinomycetes	o__Kitasatosporales	f__Streptomycetaceae	g__Wenjunlia	538	492	372	652	524	610	718	794	652	650	644	588	974	928	778	384	220	320	852	818	1486	1496	558	432	1280	1366	1460	1012	1504	1634	4662	3832	3938	4866	4818	3630	467.333	648	600.667	940.333	1376	4291	50482
d__Bacteria	k__unclassified_d__Bacteria	p__Thermodesulfobacteriota	c__Desulfobacteria	o__Desulfobacterales	f__Desulfatirhabdiaceae	g__Desulfatirhabdium	2508	1862	2056	2106	2268	3688	4196	3918	5454	3200	4258	3352	4222	3770	3156	2422	3768	2662	4538	3494	3016	1352	2420	1596	10882	9336	9302	14650	10000	17454	4366	4192	3934	4616	4126	4504	2142	3604.44	3333.33	2736	11937.3	4289.67	172644
d__Bacteria	k__unclassified_d__Bacteria	p__Pseudomonadota	c__Alphaproteobacteria	o__Hyphomicrobiales	f__Beijerinckiaceae	g__Beijerinckia	4488	2172	2264	3058	2396	2734	3144	3690	2404	3002	3024	2872	3394	2234	1742	1468	1368	1412	776	716	986	938	1006	702	1056	1050	1138	922	1294	1380	4420	3770	4174	4038	5044	4232	2974.67	2924.89	1936.33	854	1140	4279.67	84508
d__Bacteria	k__unclassified_d__Bacteria	p__Actinomycetota	c__Actinomycetes	o__Propionibacteriales	f__Nocardioidaceae	g__Pimelobacter	338	508	288	680	666	830	866	802	748	830	672	1002	850	622	512	704	648	694	724	718	1216	1496	548	466	962	1000	1118	862	1152	1288	4440	3826	3912	4612	5100	3774	378	788.444	671.667	861.333	1063.67	4277.33	49474
d__Bacteria	k__unclassified_d__Bacteria	p__Bacteroidota	c__Flavobacteriia	o__Flavobacteriales	f__Flavobacteriaceae	g__Winogradskyella	21290	9064	18832	3082	2834	4560	4492	5650	4452	2214	2294	3518	17078	9870	7744	23898	37632	12952	4944	3764	3320	9308	3292	2990	5462	5232	5788	6258	6960	7326	4666	4138	4300	3956	4376	4216	16395.3	3677.33	18195.7	4603	6171	4275.33	281752
d__Bacteria	k__unclassified_d__Bacteria	p__Acidobacteriota	c__Terriglobia	o__Bryobacterales	f__Solibacteraceae	g__Candidatus_Sulfopaludibacter	15066	9890	11628	21866	18076	21050	23432	29134	19062	31202	32178	25096	13332	11368	8462	9540	8344	12158	4736	3960	5426	3630	7394	6008	9616	8976	8642	12592	9646	14438	4314	4278	4178	4112	4300	4344	12194.7	24566.2	10534	5192.33	10651.7	4254.33	441474
d__Bacteria	k__unclassified_d__Bacteria	p__Actinomycetota	c__Acidimicrobiia	o__Acidimicrobiales	f__Acidimicrobiaceae	g__Aciditerrimonas	8692	4710	6112	7194	6012	6600	7410	7640	5742	7526	7782	6862	6132	5330	4558	2702	1006	3266	2024	1820	1948	4360	2832	2898	2174	1934	2068	1488	2180	2258	4390	3860	3952	4670	4544	4108	6504.67	6974.22	3832.33	2647	2017	4254	158784
d__Bacteria	k__unclassified_d__Bacteria	p__Pseudomonadota	c__Betaproteobacteria	o__Burkholderiales	f__Burkholderiaceae	g__Ralstonia	9272	5710	6564	6856	6450	7520	7546	8438	7156	8096	8702	7416	11890	7758	6434	4162	3388	4154	2934	2560	3414	2230	2472	2020	3148	3138	3196	2176	2612	3224	4344	4250	4102	4758	3986	4048	7182	7575.56	6297.67	2605	2915.67	4248	186124
d__Bacteria	k__unclassified_d__Bacteria	p__Nitrospirota	c__Nitrospiria	o__Candidatus_Troglogloeales	f__Candidatus_Manganitrophaceae	g__Candidatus_Manganitrophus	6796	5330	5578	11164	9788	10946	11782	13498	10790	16376	17462	13504	8118	7382	5830	6136	5418	7472	4268	3690	4374	3474	4642	4052	7406	6282	6752	9302	6550	10848	4402	4260	4054	4122	4196	4400	5901.33	12812.2	6726	4083.33	7856.67	4239	270444
d__Bacteria	k__unclassified_d__Bacteria	p__Actinomycetota	c__Actinomycetes	o__Micrococcales	f__Intrasporangiaceae	g__Lapillicoccus	290	324	166	638	490	642	590	698	772	638	598	728	708	578	494	646	322	674	812	874	1274	1746	620	524	1474	1626	1592	1202	1678	1828	4558	3714	3682	4790	5110	3488	260	643.778	570.333	975	1566.67	4223.67	50588
d__Bacteria	k__unclassified_d__Bacteria	p__Pseudomonadota	c__Gammaproteobacteria	o__Vibrionales	f__Vibrionaceae	g__Photobacterium	3730	3066	2922	3642	3412	4464	4428	4588	6290	3946	4380	4058	4236	3144	2824	2980	3382	2458	3814	3154	4082	4416	4248	3994	7036	7120	6994	5886	6726	7598	4586	4286	4190	4028	3950	4286	3239.33	4356.44	3170.67	3951.33	6893.33	4221	158344
d__Bacteria	k__unclassified_d__Bacteria	p__Pseudomonadota	c__Gammaproteobacteria	o__Chromatiales	f__Ectothiorhodospiraceae	g__Alkalilimnicola	3628	2900	2660	2824	2352	2858	3130	3374	2524	2848	2990	2646	3776	3090	2896	3018	3228	2466	4558	3474	4256	5336	5466	5348	5372	4774	5022	4216	5704	5802	4442	4324	4336	4034	3808	4250	3062.67	2838.44	3079	4739.67	5148.33	4199	137730
d__Bacteria	k__unclassified_d__Bacteria	p__Pseudomonadota	c__Gammaproteobacteria	o__Alteromonadales	f__Alteromonadaceae	g__Paraglaciecola	5556	4110	4024	3786	3868	5044	4636	5142	4158	3698	3568	4234	5588	4360	3690	4018	5074	3340	4776	3616	5032	7282	5822	5774	6620	6906	6960	5542	7384	7678	4784	4190	4648	3746	3610	4214	4563.33	4237.11	4345	5383.67	6848.33	4198.67	176478
d__Bacteria	k__unclassified_d__Bacteria	p__Pseudomonadota	c__Betaproteobacteria	o__Nitrosomonadales	f__Nitrosomonadaceae	g__Nitrosospira	5902	3830	4450	9788	9144	7878	8208	7816	5932	8668	9394	7286	6902	5444	4608	4120	4048	3624	3286	2382	3412	2718	4014	3468	5400	4994	5052	4154	4608	5858	4480	4080	4136	4262	4000	4228	4727.33	8234.89	4791	3213.33	5011	4197.67	191574
d__Bacteria	k__unclassified_d__Bacteria	p__Pseudomonadota	c__Gammaproteobacteria	o__Chromatiales	f__Ectothiorhodospiraceae	g__Aquisalimonas	4322	3034	3218	4050	3628	4132	4138	4562	3930	3938	4190	3598	4414	3218	3016	3078	3158	2382	3924	3222	3862	4864	5248	5630	6140	5702	5444	4672	5614	6420	4522	4372	4170	3960	3848	4266	3524.67	4018.44	3211	4458.33	5665.33	4189.67	151886
d__Bacteria	k__unclassified_d__Bacteria	p__Actinomycetota	c__Actinomycetes	o__Streptosporangiales	f__unclassified_o__Streptosporangiales	g__Allonocardiopsis	470	532	300	536	436	476	556	656	540	560	462	478	836	788	640	374	292	344	616	610	976	1188	412	308	836	840	946	830	1038	1262	4510	3794	3906	4606	4860	3392	434	522.222	545.667	685	958.667	4178	44206
d__Bacteria	k__unclassified_d__Bacteria	p__Candidatus_Pacebacteria	c__unclassified_p__Candidatus_Pacebacteria	o__unclassified_p__Candidatus_Pacebacteria	f__unclassified_p__Candidatus_Pacebacteria	g__unclassified_p__Candidatus_Pacebacteria	4260	3444	3694	4308	4236	4636	4884	5312	5468	5108	5714	4906	5660	5008	4574	4820	7302	3932	3620	2952	3774	2362	3416	2372	6682	5748	5948	9806	6536	10748	4308	4000	3808	4294	4400	4256	3799.33	4952.44	5216	3082.67	7578	4177.67	176296
d__Bacteria	k__unclassified_d__Bacteria	p__Gemmatimonadota	c__Gemmatimonadetes	o__Gemmatimonadales	f__Gemmatimonadaceae	g__Gemmatirosa	13896	7694	9616	11576	9804	10336	11160	12726	8528	14006	14228	11406	7170	7108	5314	4778	4250	5622	4376	3814	4488	3608	7774	4384	9920	8734	8736	18510	15460	17678	4356	4228	4270	3940	4012	4186	10402	11530	5707	4740.67	13173	4165.33	301692
d__Bacteria	k__unclassified_d__Bacteria	p__Kiritimatiellota	c__Kiritimatiellia	o__Kiritimatiellales	f__Pontiellaceae	g__Pontiella	5566	11308	4376	26492	18566	31286	46680	31104	95378	34310	60734	52646	19256	11914	12822	24780	6910	5924	7430	6620	9990	7604	5478	5268	11330	10508	10666	15110	16900	18284	4396	4018	4126	3990	4000	4356	7083.33	44132.9	13601	7065	13799.7	4147.67	650126
d__Bacteria	k__unclassified_d__Bacteria	p__Pseudomonadota	c__Gammaproteobacteria	o__Nevskiales	f__Nevskiaceae	g__Sinimarinibacterium	3806	2448	2902	2348	2070	2294	2482	2876	2160	2374	2412	2412	5432	3796	3158	3552	3580	2196	2676	1966	2772	3232	2632	2204	3796	3614	4064	2974	4134	4088	4364	4084	4170	4348	3994	3922	3052	2380.89	3619	2580.33	3778.33	4147	115332
d__Bacteria	k__unclassified_d__Bacteria	p__Pseudomonadota	c__Gammaproteobacteria	o__Alteromonadales	f__Pseudoalteromonadaceae	g__Pseudoalteromonas	4214	3274	3210	4548	4202	5764	5370	6640	5288	4426	4710	4876	4248	3536	3570	3542	4828	3430	4462	3592	4500	4924	5026	5100	8176	7712	7588	6576	7514	8518	4366	4300	4248	3972	3842	4110	3566	5091.56	3859	4600.67	7680.67	4139.67	178202
d__Bacteria	k__unclassified_d__Bacteria	p__Actinomycetota	c__Thermoleophilia	o__Solirubrobacterales	f__Solirubrobacteraceae	g__Candidatus_Siliceabacter	1258	1324	1016	8478	7136	4566	2406	2920	2066	3610	3126	2266	1848	1410	1130	1382	1064	1228	1632	1414	2526	2304	1424	1254	2934	2604	2936	2346	2880	3842	4260	4064	3850	4346	4500	3800	1199.33	4063.78	1343.67	1759	2923.67	4136.67	101150
d__Bacteria	k__unclassified_d__Bacteria	p__Pseudomonadota	c__Alphaproteobacteria	o__Rhodobacterales	f__Roseobacteraceae	g__Roseicyclus	2998	2030	2212	1272	1078	1458	1394	1772	1352	1296	1448	1542	6804	3942	3634	3476	3740	1980	3750	2862	2284	7228	3418	3420	1830	1616	1856	1358	2690	2460	4312	3444	3832	4672	4792	3740	2413.33	1401.33	3929.33	3827	1968.33	4132	102992
d__Archaea	k__unclassified_d__Archaea	p__Euryarchaeota	c__Methanomicrobia	o__Methanomicrobiales	f__Methanoregulaceae	g__unclassified_f__Methanoregulaceae	8082	5136	6568	4834	4526	5916	6302	6454	7162	6572	7660	6522	6588	6842	4686	5232	5358	5408	3516	2724	4018	2028	1836	1352	4412	3986	3830	4954	3198	5838	3980	3930	4006	4374	4206	4286	6595.33	6216.44	5685.67	2579	4369.67	4130.33	176322
d__Bacteria	k__unclassified_d__Bacteria	p__Pseudomonadota	c__Gammaproteobacteria	o__Chromatiales	f__unclassified_o__Chromatiales	g__unclassified_o__Chromatiales	1682	1240	1410	1098	1058	1192	1364	1398	1536	1426	1588	1554	1536	1376	1362	1106	1512	782	2118	1756	1922	2344	1534	1316	7120	7094	7754	4146	4000	5046	4366	4322	4004	4354	3722	3924	1444	1357.11	1279	1831.67	5860	4115.33	95062
d__Bacteria	k__unclassified_d__Bacteria	p__Chloroflexota	c__Chloroflexia	o__Chloroflexales	f__Oscillochloridaceae	g__Candidatus_Viridilinea	3078	2638	2570	3366	3320	4208	4060	4070	4578	3716	4166	3730	6088	5324	3758	4170	3372	3418	2648	2384	2998	2210	1516	1402	4584	4016	4080	3906	3456	5794	4116	3894	3820	4374	4342	4130	2762	3912.67	4355	2193	4306	4112.67	133300
d__Bacteria	k__unclassified_d__Bacteria	p__Pseudomonadota	c__Gammaproteobacteria	o__Oceanospirillales	f__Endozoicomonadaceae	g__Endozoicomonas	2414	1772	1918	2278	1992	2390	2346	2580	2210	1922	2200	2082	2720	2026	1922	1936	2244	1502	2204	1964	2418	3134	2796	2540	3546	3488	3616	3184	3834	3762	4304	4268	4322	3516	3766	4466	2034.67	2222.22	2058.33	2509.33	3571.67	4107	99582
d__Bacteria	k__unclassified_d__Bacteria	p__Pseudomonadota	c__Alphaproteobacteria	o__Rhodospirillales	f__Geminicoccaceae	g__Arboricoccus	494	592	492	11948	10180	10462	8692	10746	6728	4780	4718	4676	4636	5546	4114	2180	1884	3788	3912	3352	5826	1512	6352	3544	4348	4142	4336	4416	5358	5848	4384	3994	4270	3982	4024	3950	526	8103.33	3691.33	4083	4741.33	4100.67	174206
d__Bacteria	k__unclassified_d__Bacteria	p__Pseudomonadota	c__Alphaproteobacteria	o__Hyphomicrobiales	f__Afifellaceae	g__Afifella	3334	2714	2894	30788	25692	26566	27620	32970	22234	20900	25250	20604	13744	9624	6454	4526	2454	9920	5796	4252	5552	5604	10390	6916	5952	5924	5934	4828	7104	7412	4148	3544	3588	4250	4774	4246	2980.67	25847.1	7787	6418.33	6192.33	4091.67	388502
d__Bacteria	k__unclassified_d__Bacteria	p__Pseudomonadota	c__Betaproteobacteria	o__Burkholderiales	f__Comamonadaceae	g__Limnohabitans	4096	3200	2900	3468	2922	3166	3174	3350	2408	3014	3226	2908	11392	7620	7090	4988	8364	2430	972	1032	1448	1336	1678	1904	1518	1300	1490	1132	1512	1670	4490	4146	4076	4266	3748	3810	3398.67	3070.67	6980.67	1395	1437	4089.33	121244
d__Bacteria	k__unclassified_d__Bacteria	p__Pseudomonadota	c__Alphaproteobacteria	o__Rhodospirillales	f__Thalassospiraceae	g__Thalassospira	3284	2706	2748	9932	8330	8156	7990	9696	6230	6918	6922	6622	5456	4598	3660	3088	2674	3808	3014	2410	3442	3526	6236	5192	4178	4284	4106	3070	4040	4426	3406	3014	3062	3788	7638	3596	2912.67	7866.22	3880.67	3970	4017.33	4084	175246
d__Bacteria	k__unclassified_d__Bacteria	p__Pseudomonadota	c__Gammaproteobacteria	o__Thiotrichales	f__Thiotrichaceae	g__Thiomargarita	3386	2830	2740	4054	3442	4138	4512	4330	4658	4192	4608	4026	4820	4172	3766	3126	3064	2932	4314	4096	5016	4872	5198	4932	9032	9026	8702	7920	7210	9956	4138	3944	4120	4112	4008	4150	2985.33	4217.78	3646.67	4738	8641	4078.67	173542
d__Bacteria	k__unclassified_d__Bacteria	p__Pseudomonadota	c__Acidithiobacillia	o__Acidithiobacillales	f__Acidithiobacillaceae	g__Acidithiobacillus	4612	3428	3546	8638	7300	8012	8316	8846	7174	8530	8438	7292	5720	4998	3864	3740	3152	3870	3774	3168	3802	3870	6224	6850	5528	5154	5284	4936	4546	6108	4154	4108	3886	4232	4000	4082	3862	8060.67	4224	4614.67	5259.33	4077	193182
d__Archaea	k__unclassified_d__Archaea	p__Candidatus_Aenigmarchaeota	c__unclassified_p__Candidatus_Aenigmarchaeota	o__unclassified_p__Candidatus_Aenigmarchaeota	f__unclassified_p__Candidatus_Aenigmarchaeota	g__unclassified_p__Candidatus_Aenigmarchaeota	5226	4188	4892	5114	4648	6390	6790	7290	7332	7030	8300	6484	5870	5450	3872	4238	5366	4262	6286	5102	6136	2972	3864	3538	9032	7814	7904	13542	8032	14438	3984	4088	3634	4144	4252	4294	4768.67	6597.56	4843	4649.67	10127	4066	215798
d__Bacteria	k__unclassified_d__Bacteria	p__Actinomycetota	c__Actinomycetes	o__Micrococcales	f__Microbacteriaceae	g__Curtobacterium	708	678	598	918	846	1144	996	1040	1088	1124	1082	1218	1410	996	864	794	470	794	1148	1250	1682	2060	964	720	1876	1912	2026	1372	1918	2136	4256	3670	3722	4420	4792	3466	661.333	1050.67	888	1304	1873.33	4054.33	60158
d__Bacteria	k__unclassified_d__Bacteria	p__Pseudomonadota	c__Alphaproteobacteria	o__Rhodobacterales	f__Paracoccaceae	g__Aestuariivita	2468	1684	1844	944	962	1048	1066	1370	938	934	822	1166	2576	1428	1464	1656	2022	1120	3608	2734	3024	5848	3322	3222	2486	2262	2532	1718	2924	2804	4440	3706	4250	3580	4432	3850	1998.67	1027.78	1711	3626.33	2454.33	4043	86254
d__Bacteria	k__unclassified_d__Bacteria	p__Bacteroidota	c__Flavobacteriia	o__Flavobacteriales	f__Flavobacteriaceae	g__Muriicola	10712	4372	8330	832	836	1130	1342	1314	1148	928	996	966	2450	1582	1460	2276	3140	1542	7800	7232	3838	54556	5204	6790	4690	3586	3904	4982	5800	7076	4310	3672	4030	3870	4322	4010	7804.67	1054.67	2075	14236.7	5006.33	4035.67	185028
d__Bacteria	k__unclassified_d__Bacteria	p__Pseudomonadota	c__Betaproteobacteria	o__Nitrosomonadales	f__Sterolibacteriaceae	g__Sulfuricystis	2028	1286	1454	1146	988	1042	958	1050	744	1104	1184	842	1872	1346	1106	978	974	736	372	290	346	360	550	412	580	534	518	416	582	616	4074	4568	3886	5256	2858	3474	1589.33	1006.44	1168.67	388.333	541	4019.33	50530
d__Bacteria	k__unclassified_d__Bacteria	p__Pseudomonadota	c__Betaproteobacteria	o__Burkholderiales	f__Comamonadaceae	g__Pelomonas	8542	5484	6304	2586	2438	3056	3158	3690	2676	3166	3398	3154	7598	4690	4000	3588	3834	2446	1292	1248	1886	2076	1378	1308	2760	2620	2854	2534	2528	3192	4236	3794	3970	4310	4132	3610	6776.67	3035.78	4359.33	1531.33	2748	4008.67	123536
d__Bacteria	k__unclassified_d__Bacteria	p__Planctomycetota	c__Planctomycetia	o__Gemmatales	f__Gemmataceae	g__Gemmata	2498	2308	2002	9102	7384	8028	8002	10584	6886	8788	9654	8074	12796	8436	6212	5492	4752	4954	2374	2086	2548	2520	3310	2810	3734	3198	3612	4100	3848	5288	3984	3622	3664	4106	4406	4062	2269.33	8500.22	7107	2608	3963.33	3974	189224
d__Bacteria	k__unclassified_d__Bacteria	p__Planctomycetota	c__Planctomycetia	o__Pirellulales	f__Lacipirellulaceae	g__Pirellulimonas	1418	1902	1560	15564	10954	11830	11966	16482	9364	12676	13210	11664	8970	6402	4450	4646	3596	4314	2208	2004	2756	3144	2484	2392	3212	2814	2984	3368	4152	4820	4044	3756	3798	4152	4116	3970	1626.67	12634.4	5396.33	2498	3558.33	3972.67	211142
d__Bacteria	k__unclassified_d__Bacteria	p__Pseudomonadota	c__Gammaproteobacteria	o__Xanthomonadales	f__Xanthomonadaceae	g__Thermomonas	4758	3460	3288	2044	1698	2052	2354	2764	2012	2074	2352	2284	6764	4262	3764	4188	4502	3024	2414	1664	2374	2470	2482	1994	3544	3342	3488	3318	4452	4478	4132	3882	3846	4118	3980	3860	3835.33	2181.56	4417.33	2233	3770.33	3969.67	117482
d__Bacteria	k__unclassified_d__Bacteria	p__Pseudomonadota	c__Gammaproteobacteria	o__unclassified_c__Gammaproteobacteria	f__unclassified_c__Gammaproteobacteria	g__Pseudohongiella	6580	5428	4748	11702	11074	11260	12660	16670	7976	10500	10586	9546	5878	5120	4088	4140	6358	4502	6310	5198	6792	7236	8988	8706	6666	6862	6804	5752	8456	7550	4644	4230	4648	3066	2990	4216	5585.33	11330.4	5014.33	7205	7015	3965.67	257930
d__Bacteria	k__unclassified_d__Bacteria	p__Pseudomonadota	c__Alphaproteobacteria	o__Hyphomicrobiales	f__Rhodovibrionaceae	g__Tistlia	3196	2710	2696	17002	14288	14112	13162	15628	10340	11666	11652	10548	7332	5810	4176	3396	2150	4048	6234	4194	6130	4230	16632	11776	3344	2878	3100	2610	3648	3878	3892	3706	3892	4034	4122	4090	2867.33	13155.3	4485.33	8199.33	3243	3956	246302
d__Bacteria	k__unclassified_d__Bacteria	p__Planctomycetota	c__Planctomycetia	o__Pirellulales	f__Pirellulaceae	g__Candidatus_Laterigemmans	1460	1506	1094	4336	3070	3664	3854	5178	3460	3616	3742	3182	8248	5934	4544	13662	14756	7020	1900	1912	2396	3390	2662	2094	2796	2354	2608	2816	3486	4322	3954	3460	3768	4146	4370	4002	1353.33	3789.11	9027.33	2392.33	3063.67	3950	148762
d__Bacteria	k__unclassified_d__Bacteria	p__Pseudomonadota	c__Alphaproteobacteria	o__Hyphomicrobiales	f__Amorphaceae	g__Acuticoccus	2906	2534	2434	12380	10214	11532	11416	14246	9638	10394	10380	9984	6302	4766	3698	3112	2418	4452	5024	4250	5348	5894	5936	4854	6030	5872	6044	4506	6612	6918	3898	3724	3826	3914	4362	3960	2624.67	11131.6	4124.67	5217.67	5997	3947.33	223778
d__Bacteria	k__unclassified_d__Bacteria	p__Thermodesulfobacteriota	c__Desulfobulbia	o__Desulfobulbales	f__Desulfocapsaceae	g__Desulfocapsa	5192	4574	5378	6858	6388	9820	10164	7672	14666	7046	9646	7670	6580	7738	10890	3500	3556	5906	8200	7454	8680	4932	4894	4016	9730	9968	10234	10620	10604	14070	4036	4036	3546	3740	4048	4162	5048	8881.11	6361.67	6362.67	10871	3928	260214
d__Bacteria	k__unclassified_d__Bacteria	p__Chloroflexota	c__Ktedonobacteria	o__Ktedonobacterales	f__Reticulibacteraceae	g__Reticulibacter	2712	2350	2516	5264	4792	6208	6164	6394	7392	6158	6660	6206	6680	5772	3818	4288	3100	3972	2796	2654	3748	2486	1720	1504	5914	5206	5298	4770	4008	6620	3992	3750	3670	3984	4012	3994	2526	6137.56	4605	2484.67	5302.67	3900.33	160572
d__Bacteria	k__unclassified_d__Bacteria	p__Actinomycetota	c__Actinomycetes	o__Micrococcales	f__Ruaniaceae	g__Ruania	590	630	478	832	774	932	816	872	1118	780	828	892	1744	1208	1106	978	608	860	1144	1106	1752	2060	896	804	1826	1878	2024	1430	1846	2366	3914	3662	3502	4276	4542	3458	566	871.556	1084	1293.67	1895	3892.33	58532
d__Bacteria	k__unclassified_d__Bacteria	p__Pseudomonadota	c__Alphaproteobacteria	o__Rhodobacterales	f__Roseobacteraceae	g__Litoreibacter	5580	3336	4154	3358	2814	3308	3082	3970	3012	2776	2842	3172	4448	2778	2320	2360	2172	1676	4412	3380	3418	8864	4898	4590	3286	3446	3548	2334	3988	4102	4164	3246	3836	3994	4198	3852	4356.67	3148.22	2625.67	4927	3450.67	3881.67	130714
d__Bacteria	k__unclassified_d__Bacteria	p__Pseudomonadota	c__Alphaproteobacteria	o__Sphingomonadales	f__Erythrobacteraceae	g__Aurantiacibacter	2208	1064	12814	1732	1936	3056	1988	2256	2142	1956	1742	3008	1860	1158	1218	1656	1412	1880	1104	740	860	1568	1242	1188	3388	2350	3168	1788	5456	3558	3970	3442	3798	3810	4186	4014	5362	2201.78	1530.67	1117	3284.67	3870	94716
d__Bacteria	k__unclassified_d__Bacteria	p__Pseudomonadota	c__Alphaproteobacteria	o__Rhodospirillales	f__Rhodospirillaceae	g__Denitrobaculum	3220	2554	2732	17848	15048	14174	13042	14548	10220	11032	11034	9786	7640	6140	4136	3298	1938	4152	6652	4450	6562	4218	18346	14612	3352	3080	3502	2572	3620	3776	3944	3524	3784	3850	4082	3794	2835.33	12970.2	4550.67	9140	3317	3829.67	250262
d__Bacteria	k__unclassified_d__Bacteria	p__Chloroflexota	c__Dehalococcoidia	o__unclassified_c__Dehalococcoidia	f__unclassified_c__Dehalococcoidia	g__Dehalogenimonas	4172	3276	3304	4728	4170	5676	6040	5074	6886	6886	8528	6000	5534	4494	3424	3768	2716	4042	2536	2502	2828	2692	1546	1366	5280	4912	4862	5978	3916	8092	3864	3718	3448	3874	4266	3744	3584	5998.67	3996.33	2245	5506.67	3819	158142
d__Bacteria	k__unclassified_d__Bacteria	p__Actinomycetota	c__Actinomycetes	o__Mycobacteriales	f__unclassified_o__Mycobacteriales	g__Fodinicola	776	702	606	980	912	1084	1086	1130	910	952	986	876	1068	898	698	538	294	460	910	926	1380	1910	684	630	1668	1698	1750	1230	1648	1986	4108	3542	3438	4054	4432	3238	694.667	990.667	659.333	1073.33	1663.33	3802	54188
d__Bacteria	k__unclassified_d__Bacteria	p__Pseudomonadota	c__Gammaproteobacteria	o__Chromatiales	f__Chromatiaceae	g__Lamprobacter	996	916	836	732	586	736	896	1062	862	904	970	846	1418	1140	1058	1228	1602	758	8038	9268	8460	7472	4364	4292	14546	13296	13956	9096	12644	12968	3862	3576	3486	4224	3950	3576	916	843.778	1200.67	6982.33	12751	3779	158620
d__Bacteria	k__unclassified_d__Bacteria	p__Planctomycetota	c__Planctomycetia	o__Planctomycetales	f__Planctomycetaceae	g__Thalassoroseus	2126	2192	1776	10304	7284	8210	7790	11140	6712	7316	7380	7142	8374	5906	4362	4958	4340	3830	3470	3254	4724	4296	9538	6290	4102	3918	4040	4822	5408	6722	3810	3310	3410	4024	4128	3990	2031.33	8142	5295	5262	4835.33	3778.67	194398
d__Bacteria	k__unclassified_d__Bacteria	p__Thermomicrobiota	c__Thermomicrobia	o__Sphaerobacterales	f__Sphaerobacteraceae	g__Nitrolancea	3110	2548	2414	6920	5828	6426	6314	6806	5800	6542	6772	5840	6696	6170	4370	4342	2500	4544	2038	1816	2144	2024	1488	1180	4072	3898	4040	3630	3226	4916	3690	3626	4056	3854	3738	3558	2690.67	6360.89	4770.33	1781.67	3963.67	3753.67	150936
d__Bacteria	k__unclassified_d__Bacteria	p__Bacteroidota	c__Bacteroidia	o__Bacteroidales	f__Odoribacteraceae	g__Odoribacter	5980	6206	5798	832	798	1258	1030	984	1712	1074	1292	1162	10972	6248	6194	27652	62014	12330	1550	1270	1218	1784	974	636	42488	24528	22162	186146	48626	121258	3962	3828	3740	3954	3410	3578	5994.67	1126.89	20901.7	1238.67	74201.3	3745.33	628648
d__Bacteria	k__unclassified_d__Bacteria	p__Bacillota	c__Clostridia	o__Moorellales	f__Moorellaceae	g__Moorella	5040	4292	4366	5208	4490	6356	6980	6466	8574	7886	8854	7310	5456	5044	3840	4466	3722	5068	3106	2864	3396	2186	1768	1660	6528	6180	6240	8080	4988	9366	3656	3666	3362	3906	4098	3738	4566	6902.67	4599.33	2496.67	6897	3737.67	182206
d__Bacteria	k__unclassified_d__Bacteria	p__Pseudomonadota	c__Gammaproteobacteria	o__Alteromonadales	f__Colwelliaceae	g__Thalassotalea	6096	4388	5190	2598	2242	2928	2840	3658	2706	2740	2858	2786	5008	3300	2894	4238	4294	2468	4944	3552	5322	6702	5418	5310	7946	8016	8108	7170	8816	9156	4002	3938	3984	3482	3108	3854	5224.67	2817.33	3700.33	5208	8202	3728	166060
d__Bacteria	k__unclassified_d__Bacteria	p__Thermomicrobiota	c__Thermomicrobia	o__Thermomicrobiales	f__Thermomicrobiaceae	g__Thermalbibacter	4018	2994	3094	9842	7762	8670	8504	8788	7348	8554	8932	7958	7428	6980	4680	4228	2050	4676	2144	1932	2742	2380	1922	1818	3452	3130	3322	3182	2892	4272	3848	3590	3614	3622	4026	3628	3368.67	8484.22	5007	2156.33	3375	3721.33	172022
d__Bacteria	k__unclassified_d__Bacteria	p__Cyanobacteriota	c__Cyanophyceae	o__Chroococcales	f__Microcystaceae	g__Microcystis	3452	2798	2638	4706	3948	4606	4764	5274	4574	4614	5054	4334	6566	4952	4022	3912	3958	3186	9232	8902	7654	14612	9368	7832	5780	4936	4908	5756	7416	7506	3794	3666	3432	3822	4008	3564	2962.67	4652.67	4432.67	9600	6050.33	3714.33	193546
d__Bacteria	k__unclassified_d__Bacteria	p__Pseudomonadota	c__Gammaproteobacteria	o__Cellvibrionales	f__Cellvibrionaceae	g__Simiduia	4012	2786	2974	2174	2448	3372	2986	5242	2026	1748	1592	2458	3584	2496	2312	2556	2320	2284	2128	1700	2342	2910	2592	2562	3188	3080	3066	2836	3354	3646	3938	4004	3748	3454	3158	3886	3257.33	2671.78	2592	2372.33	3195	3698	104962
d__Bacteria	k__unclassified_d__Bacteria	p__Thermodesulfobacteriota	c__Desulfuromonadia	o__Geobacterales	f__Geobacteraceae	g__Geomonas	5732	5460	4956	6068	5824	7552	9186	9794	8756	12926	14552	10338	6110	4976	4322	5336	5254	5716	4416	3508	4110	2994	3276	2716	5122	4514	4522	6488	4978	7492	3954	3426	3364	3850	3736	3836	5382.67	9444	5285.67	3503.33	5519.33	3694.33	209160
d__Bacteria	k__unclassified_d__Bacteria	p__Bacillota	c__Bacilli	o__Bacillales	f__Alicyclobacillaceae	g__Alicyclobacillus	5504	3828	4378	5852	5064	5834	6074	6290	5794	7692	7820	6580	5412	4758	3440	3890	3094	4008	2530	2232	2846	2778	2608	2172	4088	3760	3680	4834	3886	5846	3740	3510	3534	3788	3856	3722	4570	6333.33	4100.33	2527.67	4349	3691.67	158722
d__Bacteria	k__unclassified_d__Bacteria	p__Pseudomonadota	c__Alphaproteobacteria	o__Rhodospirillales	f__Rhodospirillaceae	g__Hypericibacter	3196	2654	2444	16370	14184	13486	12094	14306	9376	11012	10600	9474	7738	5952	4178	3224	2070	4008	4020	2820	4166	2772	11976	9752	2838	2470	2678	3086	3112	4154	3746	3364	3566	3856	3930	3662	2764.67	12322.4	4528.33	5917.67	3056.33	3687.33	222334
d__Bacteria	k__unclassified_d__Bacteria	p__Pseudomonadota	c__Gammaproteobacteria	o__Immundisolibacterales	f__Immundisolibacteraceae	g__Immundisolibacter	3490	2314	2468	1830	1472	1770	1938	2142	1786	2100	2074	1842	4174	2760	2568	2864	2718	1780	1760	1424	1804	2074	1990	1928	2564	2346	2636	2438	2592	3130	3922	3630	3474	4064	3598	3436	2757.33	1883.78	2810.67	1830	2617.67	3687.33	90900
d__Bacteria	k__unclassified_d__Bacteria	p__Pseudomonadota	c__Gammaproteobacteria	o__Chromatiales	f__Ectothiorhodospiraceae	g__Thiohalomonas	3146	2558	2804	2404	2220	2722	2814	2782	3420	2690	3264	2630	5108	6722	10518	7504	14836	18606	3692	4660	3898	3250	5162	3616	6468	7238	7588	3304	3926	4388	3876	3694	3582	3888	3442	3634	2836	2771.78	10549	4046.33	5485.33	3686	176054
d__Bacteria	k__unclassified_d__Bacteria	p__Pseudomonadota	c__Gammaproteobacteria	o__Pseudomonadales	f__Pseudomonadaceae	g__Halopseudomonas	3766	2944	2636	2238	2028	2788	2416	2936	2220	1932	2200	2298	3114	2548	2228	2902	2830	1966	2756	2118	2972	3154	3124	2842	4162	4146	4238	3354	4014	4460	4050	3834	3866	3240	3322	3800	3115.33	2339.56	2598	2827.67	4062.33	3685.33	109442
d__Bacteria	k__unclassified_d__Bacteria	p__Thermodesulfobacteriota	c__Syntrophobacteria	o__Syntrophobacterales	f__Syntrophobacteraceae	g__Desulfoglaeba	4480	3682	4556	1620	1684	2234	2748	2892	3228	2630	3000	2228	2256	2492	2146	1724	2092	1974	14852	10786	10346	3354	6560	2246	4400	3594	3636	6470	3852	6818	3558	3934	3404	3386	3424	4328	4239.33	2473.78	2114	8024	4795	3672.33	146614
d__Bacteria	k__unclassified_d__Bacteria	p__Pseudomonadota	c__Betaproteobacteria	o__Burkholderiales	f__Comamonadaceae	g__Acidovorax	5790	4106	4148	2746	2314	2694	2702	3152	2238	2800	2784	2774	5072	3448	3124	2614	2932	2018	1202	1142	1396	1898	1448	1270	2178	2242	2288	2240	2386	2742	3758	3622	3596	3974	3826	3212	4681.33	2689.33	3201.33	1392.67	2346	3664.67	101876
d__Bacteria	k__unclassified_d__Bacteria	p__Pseudomonadota	c__Gammaproteobacteria	o__Xanthomonadales	f__Xanthomonadaceae	g__Silanimonas	4182	2738	2940	788	696	862	862	1136	738	816	884	800	7428	4466	4120	5240	5278	2798	1060	774	1096	1644	1298	1140	1768	1590	1506	1614	2050	2106	3968	3398	3496	4146	3404	3432	3286.67	842.444	4888.33	1168.67	1772.33	3640.67	86262
d__Bacteria	k__unclassified_d__Bacteria	p__Pseudomonadota	c__Gammaproteobacteria	o__unclassified_c__Gammaproteobacteria	f__unclassified_c__Gammaproteobacteria	g__Litorivivens	1916	936	1414	704	662	694	780	1106	642	670	692	682	698	762	732	478	468	430	890	822	1108	1470	1118	976	948	874	998	672	1056	968	3936	4066	3850	3072	2906	3990	1422	736.889	594.667	1064	919.333	3636.67	48186
d__Bacteria	k__unclassified_d__Bacteria	p__Thermodesulfobacteriota	c__Desulfuromonadia	o__Desulfuromonadales	f__Geothermobacteraceae	g__Geothermobacter	5532	12978	5442	6198	5682	6894	7388	6938	10750	10184	11944	8392	4342	4070	3170	4484	7038	4590	3902	3188	4044	2382	3490	3430	4584	4070	4032	6856	6074	7382	4128	3812	3896	3066	2924	3902	7984	8263.33	4615.67	3406	5499.67	3621.33	201178
d__Bacteria	k__unclassified_d__Bacteria	p__Pseudomonadota	c__Alphaproteobacteria	o__Hyphomicrobiales	f__Phyllobacteriaceae	g__Zhengella	2870	2126	2154	4952	4058	4970	5284	6742	5230	5726	5708	6172	4690	3076	2426	16658	14486	14736	1546	1140	1430	1862	2972	1372	2336	2078	2344	1602	2634	2596	3466	2876	3098	4234	4554	3428	2383.33	5426.89	9345.33	1720.33	2265	3609.33	157632
d__Bacteria	k__unclassified_d__Bacteria	p__Actinomycetota	c__Actinomycetes	o__Micromonosporales	f__Micromonosporaceae	g__Krasilnikovia	270	248	236	646	636	618	692	724	502	848	730	748	634	598	426	220	142	256	582	530	990	1218	490	368	602	626	704	588	836	930	3602	3312	3414	3950	4290	3070	251.333	682.667	379.333	696.333	714.333	3606.33	39276
d__Bacteria	k__unclassified_d__Bacteria	p__Pseudomonadota	c__Alphaproteobacteria	o__Rhodobacterales	f__Paracoccaceae	g__Thioclava	5132	3804	4026	3098	2896	3398	3340	4082	3946	3666	3438	4380	5720	3182	2984	5864	4180	5776	2704	1956	1896	4448	3160	2936	3022	2900	3426	2402	3258	3510	3632	3084	3318	4056	4218	3306	4320.67	3582.67	4617.67	2850	3086.33	3602.33	130144
d__Bacteria	k__unclassified_d__Bacteria	p__Pseudomonadota	c__Alphaproteobacteria	o__Rhodobacterales	f__Paracoccaceae	g__Amaricoccus	4494	3208	3668	5660	4692	5602	5418	7592	4846	6056	5850	8150	5238	3554	2994	3234	2812	2794	2866	2178	2814	3238	5062	4980	3462	3408	3810	2506	3546	3972	3666	3148	3480	3694	4196	3394	3790	5985.11	3437.67	3523	3450.67	3596.33	149282
d__Bacteria	k__unclassified_d__Bacteria	p__Pseudomonadota	c__Gammaproteobacteria	o__Legionellales	f__Legionellaceae	g__Legionella	9440	3490	9112	5264	5574	4934	4586	5906	4504	4700	5038	5840	5266	3790	3114	3510	4020	4376	3156	2740	3262	2982	4078	4086	5346	4896	5186	4454	4772	5426	3440	3462	3478	3670	4028	3438	7347.33	5149.56	4012.67	3384	5013.33	3586	164364
d__Bacteria	k__unclassified_d__Bacteria	p__Verrucomicrobiota	c__Verrucomicrobiae	o__Limisphaerales	f__Fontisphaeraceae	g__Fontisphaera	3348	3042	2580	3860	3098	4042	4164	4628	4692	4718	5426	4614	10714	7652	5824	5558	5648	3668	1336	1144	1706	1140	1018	898	2312	1944	2174	2758	2622	3418	3600	3380	3444	3668	3616	3792	2990	4360.22	6510.67	1207	2538	3583.33	131246
d__Bacteria	k__unclassified_d__Bacteria	p__Actinomycetota	c__Actinomycetes	o__Micromonosporales	f__Micromonosporaceae	g__Longispora	1308	1040	946	1404	1290	1644	1680	1732	1638	1964	1816	1854	1422	1118	784	616	382	676	1018	1020	1520	1826	1004	864	1588	1724	1694	1368	1724	1908	3908	3366	3132	3972	4068	3046	1098	1669.11	833	1208.67	1667.67	3582	62064
d__Bacteria	k__unclassified_d__Bacteria	p__Pseudomonadota	c__Betaproteobacteria	o__Burkholderiales	f__Alcaligenaceae	g__Bordetella	12522	7510	8744	5392	4642	4710	5274	5682	3776	5332	5314	4698	13078	7706	7112	3488	3144	2374	1538	1294	1572	2144	2338	2114	2462	2204	2250	1922	2192	2640	3712	3646	3428	3744	3446	3464	9592	4980	6150.33	1833.33	2278.33	3573.33	156608
d__Bacteria	k__unclassified_d__Bacteria	p__Planctomycetota	c__Planctomycetia	o__Planctomycetales	f__Planctomycetaceae	g__Schlesneria	2976	4206	2506	9096	6706	7330	7554	10370	5906	7368	7532	6888	9226	6522	4542	5280	4812	4034	1966	1634	2516	2188	5460	3852	2410	1906	2050	2544	3024	3886	3682	3120	3342	3712	3806	3704	3229.33	7638.89	5736	2936	2636.67	3561	167656
d__Bacteria	k__unclassified_d__Bacteria	p__Pseudomonadota	c__Gammaproteobacteria	o__Chromatiales	f__Ectothiorhodospiraceae	g__Spiribacter	3156	2332	2154	3290	2812	3292	3232	3624	2730	2932	2964	2396	4010	3024	2976	2906	3438	2158	3066	2770	3294	4828	4498	4528	4642	4244	4694	4722	5280	5934	3836	3508	3590	3460	3222	3690	2547.33	3030.22	3085.33	3830.67	4919.33	3551	127232
d__Bacteria	k__unclassified_d__Bacteria	p__Pseudomonadota	c__Alphaproteobacteria	o__Maricaulales	f__Robiginitomaculaceae	g__Robiginitomaculum	5784	4586	4022	3688	3112	3480	3794	4136	3316	2996	3358	2982	4902	3790	3394	3894	3450	2618	4612	3506	5170	5990	5728	5874	5122	5102	5428	4624	6324	6312	3920	3430	3650	3548	3370	3376	4797.33	3429.11	3674.67	5146.67	5485.33	3549	152388
d__Bacteria	k__unclassified_d__Bacteria	p__Pseudomonadota	c__Alphaproteobacteria	o__Hyphomicrobiales	f__Phyllobacteriaceae	g__Chelativorans	4656	2954	4254	15326	12220	14092	14730	18272	11898	14172	14368	13074	8240	5976	4542	4964	3940	5488	3500	2556	3370	3332	8066	4016	3832	3888	3976	3020	4078	4536	3452	3144	3064	3896	4234	3494	3954.67	14239.1	5525	4140	3888.33	3547.33	242620
d__Bacteria	k__unclassified_d__Bacteria	p__Actinomycetota	c__Actinomycetes	o__Streptosporangiales	f__Streptosporangiaceae	g__Spongiactinospora	1280	704	816	792	772	878	908	1002	930	966	912	770	766	732	528	316	272	406	868	894	1270	1322	558	432	1298	1218	1310	1046	1368	1424	3726	3174	3212	3812	4058	3268	933.333	881.111	503.333	890.667	1277.33	3541.67	48008
d__Bacteria	k__unclassified_d__Bacteria	p__Pseudomonadota	c__Alphaproteobacteria	o__Rhodobacterales	f__Paracoccaceae	g__Cereibacter	3826	2288	2798	1994	1678	1952	1944	2300	1824	1934	1884	2380	5546	3632	2954	3828	3908	2426	1648	1260	1416	2374	2118	1768	1968	1870	1950	1558	2132	2216	3406	2668	2888	4626	4742	2892	2970.67	1987.78	3715.67	1764	1949	3537	92596
d__Bacteria	k__unclassified_d__Bacteria	p__Acidobacteriota	c__Holophagae	o__Acanthopleuribacterales	f__Acanthopleuribacteraceae	g__Sulfidibacter	5148	3562	3558	6186	5232	6062	6574	7290	5568	7986	7914	6038	5768	5684	5184	5092	5916	4838	3658	3094	4042	3464	4828	5504	6768	5514	5754	9918	7020	10050	3712	3544	3410	3492	3476	3574	4089.33	6538.89	5413.67	4098.33	7504	3534.67	194422
d__Bacteria	k__unclassified_d__Bacteria	p__Pseudomonadota	c__Alphaproteobacteria	o__Rhodobacterales	f__Paracoccaceae	g__Yoonia	5374	4118	4100	2118	1750	2154	2198	2904	2652	2378	2308	2752	5358	3206	2402	2710	2536	1794	3182	2558	2412	6074	3170	3026	2816	2624	2974	1886	3168	3122	3802	3158	3582	3584	3744	3302	4530.67	2357.11	3001	3403.67	2765	3528.67	110996
d__Bacteria	k__unclassified_d__Bacteria	p__Bacillota	c__Bacilli	o__Bacillales	f__Planococcaceae	g__Kurthia	100	90	62	46	56	88	58	72	68	48	46	128	72	44	68	48	20	40	64	60	70	104	102	88	70	66	46	50	90	92	424	212	1002	852	16534	2136	84	67.7778	48.6667	81.3333	69	3526.67	23216
d__Bacteria	k__unclassified_d__Bacteria	p__Pseudomonadota	c__Gammaproteobacteria	o__Xanthomonadales	f__Rhodanobacteraceae	g__Tahibacter	4192	3338	3284	2976	2680	3026	3166	3906	3028	3352	3636	3140	5934	4510	3910	4634	6042	3628	2440	2036	2578	2912	2986	3092	5102	4382	4654	5922	5830	6474	3862	3672	3612	3398	3194	3404	3604.67	3212.22	4776.33	2674	5394	3523.67	137932
d__Bacteria	k__unclassified_d__Bacteria	p__Actinomycetota	c__Actinomycetes	o__Pseudonocardiales	f__Pseudonocardiaceae	g__Streptoalloteichus	396	444	296	526	690	648	832	824	798	766	736	612	880	746	718	520	316	622	1086	1008	1608	1702	910	710	1552	1646	1712	1398	1952	2186	3684	3262	3244	3912	4120	2910	378.667	714.667	633.667	1170.67	1741	3522	49972
d__Bacteria	k__unclassified_d__Bacteria	p__Bacillota	c__Bacilli	o__Bacillales	f__Staphylococcaceae	g__Staphylococcus	3048	2838	2748	2958	2666	2906	2804	3086	2818	2868	3072	2918	3388	2770	2398	2592	2778	2538	2580	2074	2168	2460	2732	2620	2512	2354	2424	2468	2590	2896	3082	3044	3150	3298	5048	3502	2878	2899.56	2744	2439	2540.67	3520.67	102196
d__Bacteria	k__unclassified_d__Bacteria	p__Pseudomonadota	c__Alphaproteobacteria	o__Rhodobacterales	f__Paracoccaceae	g__Coraliihabitans	3216	1990	2374	5260	4210	4738	4694	6408	3832	5326	5228	5496	3150	2304	2168	2328	2092	1966	3358	2610	3010	4504	8826	10764	2260	1942	2110	1624	2832	2582	3556	3128	3294	3516	4270	3340	2526.67	5021.33	2334.67	5512	2225	3517.33	134306
d__Bacteria	k__unclassified_d__Bacteria	p__Pseudomonadota	c__Alphaproteobacteria	o__Hyphomonadales	f__Hyphomonadaceae	g__Henriciella	3282	2632	3224	3558	2900	3252	3514	3926	2978	2988	3342	2912	3682	2624	2182	3338	3372	2198	4634	3870	4482	9892	5616	5918	3962	3926	3836	3536	5226	4676	3762	3446	3656	3414	3302	3480	3046	3263.33	2899.33	5735.33	4193.67	3510	136538
d__Bacteria	k__unclassified_d__Bacteria	p__Pseudomonadota	c__Alphaproteobacteria	o__Hyphomicrobiales	f__Phyllobacteriaceae	g__Aquibium	3710	2610	2938	7258	6050	6854	7240	8890	6002	6998	7096	6964	6594	3978	3322	4084	3626	3594	3188	2204	2814	3310	6310	2736	3764	3650	3912	2772	4082	4296	3410	3178	3004	3850	4150	3404	3086	7039.11	4199.67	3427	3746	3499.33	161842
d__Bacteria	k__unclassified_d__Bacteria	p__Thermodesulfobacteriota	c__Desulfobacteria	o__Desulfobacterales	f__Desulfobacteraceae	g__Desulfotignum	1786	1518	1906	2900	2558	3820	3880	3512	5258	2948	3936	3100	3960	3674	3124	2118	3544	2336	5580	4568	4606	2160	3288	2394	10716	9508	9524	15648	10030	17566	3524	3364	3146	3610	3600	3730	1736.67	3545.78	3126	3766	12165.3	3495.67	172440
d__Bacteria	k__unclassified_d__Bacteria	p__Planctomycetota	c__Planctomycetia	o__Planctomycetales	f__Planctomycetaceae	g__Planctomicrobium	1854	2780	1642	9444	6690	7418	7016	10484	5442	4998	5464	4982	7074	5346	4112	5192	5160	3680	1798	1738	2330	2460	3746	2986	2852	2536	2668	3210	3874	4556	3330	3170	3296	3348	3906	3772	2092	6882	5094	2509.67	3282.67	3470.33	154354
d__Bacteria	k__unclassified_d__Bacteria	p__Bacteroidota	c__Bacteroidia	o__Marinilabiliales	f__Marinilabiliaceae	g__Carboxylicivirga	4368	12266	3446	2090	4944	10122	4486	3390	13280	2492	2946	2664	4056	2956	2530	6542	13140	3790	2508	2378	2622	18652	1762	1152	11516	10670	11442	19864	14048	17996	3632	3502	3556	3308	3302	3486	6693.33	5157.11	5502.33	4845.67	14256	3464.33	234904
d__Archaea	k__unclassified_d__Archaea	p__Candidatus_Thermoplasmatota	c__Thermoplasmata	o__Thermoplasmatales	f__unclassified_o__Thermoplasmatales	g__unclassified_o__Thermoplasmatales	3412	2448	2878	2980	2660	3542	3812	3430	4408	3420	3898	3344	4012	4000	2976	3622	4534	3060	3934	3124	4096	2298	2026	1602	6018	5888	5532	8750	5498	8900	3514	3162	3310	3564	3654	3546	2912.67	3499.33	3700.67	2846.67	6764.33	3458.33	140852
d__Bacteria	k__unclassified_d__Bacteria	p__Pseudomonadota	c__Gammaproteobacteria	o__Arenicellales	f__Arenicellaceae	g__Arenicella	5932	4628	4478	5608	4714	5640	6412	6648	5286	5804	6302	5342	4302	3594	2792	3018	3276	2294	6100	4658	6064	8860	11622	13466	7494	8396	8590	5298	7382	7458	4064	3596	3800	3016	2694	3530	5012.67	5750.67	3212.67	8461.67	7436.33	3450	202158
d__Bacteria	k__unclassified_d__Bacteria	p__Actinomycetota	c__Actinomycetes	o__Mycobacteriales	f__Nocardiaceae	g__Prescottella	562	590	364	1344	1324	1368	1342	1350	1208	1220	1342	1304	1168	922	692	440	314	640	758	634	1234	1276	776	444	1222	1412	1394	968	1374	1598	3566	3090	3264	3884	3854	3022	505.333	1311.33	696	853.667	1328	3446.67	51264
d__Bacteria	k__unclassified_d__Bacteria	p__Pseudomonadota	c__Alphaproteobacteria	o__Hyphomicrobiales	f__Tepidamorphaceae	g__Tepidamorphus	2118	1688	1662	7570	6350	6508	6718	7664	5292	5896	6308	5972	5252	3768	2774	2832	1804	3996	1646	1382	1856	1668	2976	2352	2046	1822	1900	1606	2452	2448	3246	3028	3148	3750	4172	3288	1822.67	6475.33	3404.33	1980	2045.67	3438.67	128958
d__Bacteria	k__unclassified_d__Bacteria	p__Actinomycetota	c__Actinomycetes	o__Micrococcales	f__Dermacoccaceae	g__Flexivirga	656	650	496	684	626	698	754	780	704	736	794	708	804	760	604	466	276	496	600	652	896	1490	626	522	954	1054	1126	826	1150	1300	3650	3112	3200	3734	3944	2976	600.667	720.444	567.667	797.667	1068.33	3436	43504
d__Bacteria	k__unclassified_d__Bacteria	p__Cyanobacteriota	c__Cyanophyceae	o__Gomontiellales	f__Cyanothecaceae	g__Cyanothece	2934	1766	2078	2792	2196	2586	2698	2996	2874	2586	2822	2622	4868	3604	2692	4010	5304	3296	6094	4854	3994	7278	6456	5522	3648	3092	3192	3028	5032	4376	3666	3220	3746	3288	2992	3536	2259.33	2685.78	3962.33	5699.67	3728	3408	131738
d__Bacteria	k__unclassified_d__Bacteria	p__Rhodothermota	c__Rhodothermia	o__Rhodothermales	f__Salinibacteraceae	g__Salinibacter	3462	2172	2764	4266	3672	4252	4256	4508	3844	4494	4940	4082	4976	4622	3836	3986	4194	3568	3568	3086	3856	4498	4184	3806	7160	5960	6040	8400	7062	9846	3600	3172	3178	3460	3620	3396	2799.33	4257.11	4197	3833	7411.33	3404.33	159786
d__Bacteria	k__unclassified_d__Bacteria	p__Pseudomonadota	c__Betaproteobacteria	o__Nitrosomonadales	f__Thiobacillaceae	g__Sulfuritortus	3024	1834	2390	1070	904	984	1158	1018	978	1156	968	954	2920	1996	1846	1510	1660	1144	444	386	510	742	630	534	1694	1488	1656	1164	1110	1500	3512	3206	3258	3780	3494	3172	2416	1021.11	1846	541	1435.33	3403.67	59794
d__Bacteria	k__unclassified_d__Bacteria	p__Pseudomonadota	c__Gammaproteobacteria	o__Oceanospirillales	f__Aestuariirhabdaceae	g__Aestuariirhabdus	2194	1498	1576	1316	1026	1324	1246	1492	1388	1230	1282	1318	1502	1274	1128	1218	1354	980	2406	2116	2840	2322	2414	2286	3514	3552	3730	2546	3612	3578	3700	3546	3840	2896	2828	3564	1756	1291.33	1242.67	2397.33	3422	3395.67	79636
d__Bacteria	k__unclassified_d__Bacteria	p__Pseudomonadota	c__Betaproteobacteria	o__Burkholderiales	f__Alcaligenaceae	g__Achromobacter	6926	4388	5118	3784	3404	3494	3874	4358	3092	3592	3768	3340	8572	5484	4860	3904	3704	2642	1552	1172	1578	1712	2080	1952	2592	2164	2302	1866	2290	2570	3584	3244	3192	3626	3306	3318	5477.33	3634	4861	1674.33	2297.33	3378.33	122404
d__Bacteria	k__unclassified_d__Bacteria	p__Pseudomonadota	c__Alphaproteobacteria	o__Rhodobacterales	f__Paracoccaceae	g__Sinirhodobacter	4460	4578	3516	1446	1688	2892	2954	3460	8198	4276	3250	6448	7004	4018	2916	17938	19484	12750	578	426	408	1048	712	658	532	512	518	378	496	600	3482	2450	2792	3316	5298	2924	4184.67	3845.78	10685	638.333	506	3377	138404
d__Bacteria	k__unclassified_d__Bacteria	p__Pseudomonadota	c__Alphaproteobacteria	o__Rhodobacterales	f__Paracoccaceae	g__Jhaorihella	1272	700	918	662	644	726	802	938	688	694	768	802	1540	912	980	1066	1556	702	830	538	650	1202	1082	988	676	706	680	528	856	744	3426	3038	3188	3650	3868	3074	963.333	747.111	1126	881.667	698.333	3374	46094
d__Bacteria	k__unclassified_d__Bacteria	p__Pseudomonadota	c__Gammaproteobacteria	o__Cellvibrionales	f__Cellvibrionaceae	g__Cellvibrio	2628	2030	2210	4342	7246	12626	8140	15732	4258	4290	3160	7358	3636	2818	2250	2544	2110	4768	1950	1430	2084	2576	2398	2044	4420	4542	4778	3480	4530	4774	3764	3620	3452	3094	2742	3480	2289.33	7461.33	3021	2080.33	4420.67	3358.67	151304
d__Bacteria	k__unclassified_d__Bacteria	p__Pseudomonadota	c__Gammaproteobacteria	o__Cellvibrionales	f__Spongiibacteraceae	g__Zhongshania	2166	1388	1720	1332	1474	2202	1848	2360	1442	1262	1306	1850	1460	1190	1102	1038	1134	1216	1002	934	1220	1962	1240	1232	2684	3356	3228	2058	2598	2554	3738	3728	3452	2738	2662	3808	1758	1675.11	1190	1265	2746.33	3354.33	71684
d__Archaea	k__unclassified_d__Archaea	p__Euryarchaeota	c__Methanobacteria	o__Methanobacteriales	f__unclassified_o__Methanobacteriales	g__unclassified_o__Methanobacteriales	1150	770	1088	178	192	258	220	320	250	282	412	252	198	134	108	152	106	178	132	126	138	102	58	56	250	184	154	338	224	452	3192	2790	2602	4546	3668	3284	1002.67	262.667	146	102	267	3347	28544
d__Bacteria	k__unclassified_d__Bacteria	p__Candidatus_Kaiserbacteria	c__unclassified_p__Candidatus_Kaiserbacteria	o__unclassified_p__Candidatus_Kaiserbacteria	f__unclassified_p__Candidatus_Kaiserbacteria	g__unclassified_p__Candidatus_Kaiserbacteria	1880	1884	1808	3948	3618	4230	4360	4472	3930	3636	3624	3324	5734	4382	3192	4058	6162	2928	2314	2014	2592	2566	3920	1992	4344	4296	4370	3028	3554	4388	3512	3142	3074	3338	3582	3398	1857.33	3904.67	4409.33	2566.33	3996.67	3341	126594
d__Bacteria	k__unclassified_d__Bacteria	p__Bacteroidota	c__Chitinophagia	o__Chitinophagales	f__Chitinophagaceae	g__Flavihumibacter	3716	1920	2728	1420	1332	1664	1694	2152	1924	1900	2044	2016	7080	4126	3708	3248	5402	2176	1516	1538	1760	1370	1288	956	3266	2838	3010	3988	3976	4550	3392	3110	3354	3718	3266	3192	2788	1794	4290	1404.67	3604.67	3338.67	100338
d__Bacteria	k__unclassified_d__Bacteria	p__Pseudomonadota	c__Gammaproteobacteria	o__Thiotrichales	f__Thiotrichaceae	g__Thioploca	3072	2498	2526	4116	3800	4654	4696	4542	5158	4750	5258	4454	3808	3184	2576	2408	2312	2416	3010	2780	3390	2890	3456	3274	5486	5372	4984	4868	4480	5634	3458	3312	3180	3534	3166	3296	2698.67	4603.11	2784	3133.33	5137.33	3324.33	135798
d__Bacteria	k__unclassified_d__Bacteria	p__Pseudomonadota	c__Alphaproteobacteria	o__Rhodospirillales	f__Rhodospirillaceae	g__Ferrovibrio	2558	1984	1978	8352	7110	6816	6398	7764	4572	5624	5924	4896	4796	3856	3034	2488	1888	2794	2166	1600	2336	2470	4600	3220	2456	2290	2426	2008	2516	2624	3438	3142	3180	3510	3528	3146	2173.33	6384	3142.67	2732	2386.67	3324	133488
d__Archaea	k__unclassified_d__Archaea	p__Candidatus_Thermoplasmatota	c__Thermoplasmata	o__Methanomassiliicoccales	f__unclassified_o__Methanomassiliicoccales	g__unclassified_o__Methanomassiliicoccales	4098	2862	3320	2540	2158	3234	3486	3472	3876	3450	4196	3254	3756	3470	2946	4186	8708	3388	3710	3036	3862	2138	2240	1648	4584	4082	4176	5282	3748	6172	3322	3218	3186	3458	3472	3220	3426.67	3296.22	4409	2772.33	4674	3312.67	130954
d__Bacteria	k__unclassified_d__Bacteria	p__Pseudomonadota	c__Gammaproteobacteria	o__Salinisphaerales	f__Salinisphaeraceae	g__Salinisphaera	3090	2486	2498	4006	3602	4012	4326	4638	3972	3972	4438	3554	3858	3044	2572	2384	2178	2298	3576	2738	3252	5128	4258	4438	5258	4768	4968	4618	4918	5604	3588	3298	3168	3274	3184	3324	2691.33	4057.78	2722.33	3898.33	5022.33	3306	134288
d__Bacteria	k__unclassified_d__Bacteria	p__Pseudomonadota	c__Alphaproteobacteria	o__Hyphomicrobiales	f__Phreatobacteraceae	g__Phreatobacter	2148	1930	1678	5200	3992	4794	4798	6202	4068	4694	4768	4560	5994	4012	3324	3234	2824	2534	2524	2198	2722	3034	2492	2042	3654	3064	3312	2490	3400	4046	3538	2934	3024	3484	3692	3160	1918.67	4786.22	3653.67	2502	3327.67	3305.33	125564
d__Bacteria	k__unclassified_d__Bacteria	p__unclassified_d__Bacteria	c__Deltaproteobacteria	o__Bradymonadales	f__Bradymonadaceae	g__Persicimonas	3682	2622	2922	5222	4400	4890	4834	5578	4804	5130	4850	4550	8354	7186	7448	9110	26342	6684	3264	2830	3454	3952	4794	3192	6020	4454	4394	16050	10024	13742	3436	3070	3134	3370	3346	3420	3075.33	4917.56	10854	3581	9114	3296	214554
d__Bacteria	k__unclassified_d__Bacteria	p__Acidobacteriota	c__Blastocatellia	o__Blastocatellales	f__Pyrinomonadaceae	g__Pyrinomonas	9190	5682	6822	9302	7930	9170	10336	11958	9008	14406	14730	11470	7034	5480	4494	4042	3582	5654	2354	1994	2612	1686	3670	3014	5222	4896	4866	7292	5080	8430	3278	3152	3096	3560	3418	3166	7231.33	10923.3	5047.67	2555	5964.33	3278.33	221076
d__Bacteria	k__unclassified_d__Bacteria	p__Actinomycetota	c__Actinomycetes	o__Micrococcales	f__Dermacoccaceae	g__Luteipulveratus	218	344	180	516	422	546	464	584	640	518	578	598	810	560	480	512	384	570	920	958	1270	1696	694	552	1472	1692	1796	1426	2006	2194	3516	2856	3104	3592	3768	2756	247.333	540.667	552.667	1015	1764.33	3265.33	45192
d__Bacteria	k__unclassified_d__Bacteria	p__Pseudomonadota	c__Alphaproteobacteria	o__Futianiales	f__Futianiaceae	g__Futiania	2074	1646	1708	4960	4298	4448	4652	5282	3368	3978	4006	3748	3786	2998	2306	8804	6452	8550	2736	2272	2958	3272	4170	3034	2856	2636	2648	2056	3144	3226	3306	2938	3196	3318	3654	3178	1809.33	4304.44	5482.67	3073.67	2761	3265	131662
d__Bacteria	k__unclassified_d__Bacteria	p__Pseudomonadota	c__Alphaproteobacteria	o__Hyphomicrobiales	f__Kaistiaceae	g__Kaistia	2718	2304	2374	17454	14274	15816	16516	20752	12356	17464	17008	15214	8994	6506	4756	4122	2720	5786	1996	1740	2154	2090	2560	2038	2794	2592	2734	2062	2866	3388	3096	2908	3210	3484	3790	3092	2465.33	16317.1	5480.67	2096.33	2739.33	3263.33	235728
d__Bacteria	k__unclassified_d__Bacteria	p__Thermodesulfobacteriota	c__Desulfobacteria	o__Desulfobacterales	f__Desulfosalsimonadaceae	g__Desulfosalsimonas	1604	1268	1682	2090	1940	2918	3622	3028	4618	2748	3460	2768	5154	4356	3996	2368	4134	2376	4192	3366	3080	1404	2468	1490	7686	7048	6950	13346	7206	13158	3192	3198	2912	3560	3268	3392	1518	3021.33	3730.67	2666.67	9232.33	3253.67	145046
d__Bacteria	k__unclassified_d__Bacteria	p__Thermodesulfobacteriota	c__Desulfuromonadia	o__Desulfuromonadales	f__Syntrophotaleaceae	g__Syntrophotalea	3536	6296	3346	4834	4078	5018	5070	4906	6662	6188	7252	5728	4262	3994	3322	3852	5040	4098	3428	2776	3412	2324	2978	9364	5092	4530	4418	6308	5322	7304	3420	3234	3424	3048	2930	3464	4392.67	5526.22	4094.67	4047	5495.67	3253.33	164258
d__Bacteria	k__unclassified_d__Bacteria	p__Pseudomonadota	c__Betaproteobacteria	o__Rhodocyclales	f__Rhodocyclaceae	g__Niveibacterium	5310	3464	3654	1392	1396	1422	1346	1536	1160	1512	1588	1498	8034	4624	3722	3932	3712	2098	598	552	792	706	640	402	1430	1358	1392	1258	1350	1598	3428	3052	3128	3638	3330	2936	4142.67	1427.78	4353.67	615	1397.67	3252	82988
d__Bacteria	k__unclassified_d__Bacteria	p__Pseudomonadota	c__Acidithiobacillia	o__Acidithiobacillales	f__Thermithiobacillaceae	g__Thermithiobacillus	3618	2600	2740	3280	2796	3092	3432	3374	2754	3630	3834	3198	4088	2874	2466	2758	2586	2184	1886	1574	1990	1620	2514	1864	3320	3160	3352	3334	3180	3730	3382	3184	3138	3560	3164	3014	2986	3265.56	2826	1908	3346	3240.33	106270
d__Bacteria	k__unclassified_d__Bacteria	p__Pseudomonadota	c__Alphaproteobacteria	o__Rhodobacterales	f__Roseobacteraceae	g__Thalassococcus	3138	2024	2404	1352	1222	1540	1354	1876	1362	1250	1086	1532	2974	1726	1638	1720	1756	1444	3070	2122	2036	6286	2770	2906	1590	1476	1694	1082	2048	1970	3652	2752	3162	3136	3628	3028	2522	1397.11	1876.33	3198.33	1643.33	3226.33	79806
d__Bacteria	k__unclassified_d__Bacteria	p__Pseudomonadota	c__Alphaproteobacteria	o__Rhodobacterales	f__Roseobacteraceae	g__Dinoroseobacter	4602	2560	3522	1598	1416	1740	1740	1982	1488	1334	1514	1720	4010	2396	2198	2314	2142	1436	4190	3198	2856	8118	4132	4046	2996	2622	2898	1780	3692	3286	3400	2870	2884	3266	3692	3240	3561.33	1614.67	2416	4423.33	2879	3225.33	102878
d__Bacteria	k__unclassified_d__Bacteria	p__Pseudomonadota	c__Gammaproteobacteria	o__Methylococcales	f__Methylococcaceae	g__Methylomicrobium	3322	2352	2292	3040	3014	3292	3504	3778	3886	3740	4312	3704	3806	3116	2608	3026	3294	2716	2084	1694	2208	2368	2440	2040	4016	3994	3990	3100	3322	4194	3476	3136	3114	3288	3204	3126	2655.33	3585.56	3094.33	2139	3769.33	3224	113596
d__Bacteria	k__unclassified_d__Bacteria	p__Pseudomonadota	c__Alphaproteobacteria	o__Rhodospirillales	f__Thalassobaculaceae	g__Oceanibaculum	2850	2260	2446	14782	12818	12520	11518	13524	8546	9354	9012	8324	6312	5212	3780	2642	1734	3742	4950	3880	5396	4498	9394	7656	4880	4794	5032	4100	5212	5848	3372	3048	3212	3326	3128	3234	2518.67	11155.3	3903.67	5962.33	4977.67	3220	216336
d__Bacteria	k__unclassified_d__Bacteria	p__Pseudomonadota	c__Alphaproteobacteria	o__Rhodospirillales	f__Rhodospirillaceae	g__Dongia	2246	1734	1714	10118	8354	8140	8030	9222	5874	7150	7180	6356	6034	4544	3338	2674	2094	3118	2482	1722	2534	2120	6492	5530	2354	2278	2350	1878	2526	2822	3298	2898	3010	3562	3640	2902	1898	7824.89	3633.67	3480	2368	3218.33	152318
d__Bacteria	k__unclassified_d__Bacteria	p__Pseudomonadota	c__Alphaproteobacteria	o__Rhodobacterales	f__Roseobacteraceae	g__Loktanella	6030	3806	3778	2068	1888	2414	2156	2568	3108	2654	2426	3350	5832	4102	3066	2602	2430	1984	2662	1754	1730	4148	2370	2390	1678	1674	1870	1262	2060	2012	3338	2920	3162	3340	3494	3044	4538	2514.67	3336	2509	1759.33	3216.33	101170
d__Bacteria	k__unclassified_d__Bacteria	p__Bacillota	c__Clostridia	o__Eubacteriales	f__Clostridiales_Family_XVII._Incertae_Sedis	g__Thermaerobacter	4876	3386	3924	4928	4296	5236	5784	5572	5566	7208	7686	5942	4620	4330	3354	3304	2148	3400	2216	1836	2488	2582	2354	1880	4204	3858	3878	4654	3826	5652	3184	3114	3124	3254	3410	3092	4062	5802	3526	2226	4345.33	3196.33	144166
d__Bacteria	k__unclassified_d__Bacteria	p__Pseudomonadota	c__Alphaproteobacteria	o__Hyphomicrobiales	f__Stappiaceae	g__Labrenzia	3712	2708	3210	8186	6810	7430	7676	9594	6632	8122	8438	7836	4928	3438	2724	2534	1784	2758	3674	3002	3914	4280	4486	3442	5444	5172	5496	3582	5122	5762	3076	2764	2908	3444	3614	3214	3210	7858.22	3027.67	3799.67	5096.33	3170	170916
d__Bacteria	k__unclassified_d__Bacteria	p__Actinomycetota	c__Actinomycetes	o__Micrococcales	f__Jonesiaceae	g__Flavimobilis	156	330	142	232	266	294	240	248	308	220	234	224	508	494	364	254	170	248	550	544	976	928	352	362	722	838	918	492	880	950	3508	2814	2946	3356	3686	2688	209.333	251.778	339.667	618.667	800	3166.33	32442
d__Bacteria	k__unclassified_d__Bacteria	p__Actinomycetota	c__Actinomycetes	o__Pseudonocardiales	f__Pseudonocardiaceae	g__Crossiella	1174	866	906	1084	904	1124	1186	1186	1152	1194	1174	1106	1234	1020	824	574	486	530	980	1024	1436	2018	844	660	1892	2094	1966	1342	1734	2158	3358	2728	2696	3660	3684	2832	982	1123.33	778	1160.33	1864.33	3159.67	54830
d__Bacteria	k__unclassified_d__Bacteria	p__Bacteroidota	c__Cytophagia	o__Cytophagales	f__Catalimonadaceae	g__Catalinimonas	6946	3724	5690	2636	2332	3228	3104	3560	3278	2906	3144	2794	5586	3728	3324	3974	6018	2808	2672	2300	2780	2614	2800	2404	5566	4780	5326	7360	6404	8500	3556	3020	3334	2812	2998	3214	5453.33	2998	4239.67	2595	6322.67	3155.67	141220
d__Bacteria	k__unclassified_d__Bacteria	p__Cyanobacteriota	c__Cyanophyceae	o__Nostocales	f__Hapalosiphonaceae	g__Fischerella	2056	1972	1800	4214	3490	4304	4390	4816	4796	4226	4868	4340	4618	4092	3194	3098	2764	2812	3378	3160	3244	5852	2886	2480	4638	4490	4348	4076	3732	5216	3020	3080	2956	3220	3284	3304	1942.67	4382.67	3429.67	3500	4416.67	3144	132214
d__Bacteria	k__unclassified_d__Bacteria	p__Verrucomicrobiota	c__Verrucomicrobiae	o__Limisphaerales	f__Limisphaeraceae	g__Limisphaera	3670	3776	2922	6630	5326	6264	6948	7422	8824	7928	9646	7580	14924	10760	8514	7224	7364	4698	1422	1460	1630	1268	1418	1274	3144	2540	2788	6414	4232	5960	3180	2980	2962	3378	3204	3120	3456	7396.44	8914	1412	4179.67	3137.33	182794
d__Bacteria	k__unclassified_d__Bacteria	p__Bacteroidota	c__Flavobacteriia	o__Flavobacteriales	f__Flavobacteriaceae	g__Aquimarina	5008	3288	4416	2056	2024	2684	2544	2856	2510	2168	2386	2418	4116	2846	2342	4734	7726	3700	3192	2760	2554	5608	2294	2088	4724	4556	4688	6748	5914	6798	3238	2984	3184	2984	3356	3072	4237.33	2405.11	4244	3082.67	5571.33	3136.33	130564
d__Bacteria	k__unclassified_d__Bacteria	p__Actinomycetota	c__Actinomycetes	o__Micrococcales	f__Microbacteriaceae	g__Microcella	938	850	792	980	680	956	892	952	906	1112	996	1002	1260	918	780	466	348	444	854	880	1246	1576	726	574	1800	1852	1898	1190	1688	1844	3426	2842	2876	3314	3630	2726	860	941.778	702.667	976	1712	3135.67	50214
d__Bacteria	k__unclassified_d__Bacteria	p__Pseudomonadota	c__Alphaproteobacteria	o__Rhodospirillales	f__Rhodospirillaceae	g__Rhodospirillum	2414	1822	1798	8000	6516	6896	6390	7630	5036	5858	5490	5102	5296	3990	2908	2656	2198	2752	2418	2004	2916	3078	4872	4334	2776	2742	2922	2568	3392	3660	3260	2908	2944	3336	3382	2976	2011.33	6324.22	3300	3270.33	3010	3134.33	139240
d__Bacteria	k__unclassified_d__Bacteria	p__Bacteroidota	c__Chitinophagia	o__Chitinophagales	f__Chitinophagaceae	g__Chitinophaga	5164	3130	3832	2998	2570	3084	3344	3750	3444	3238	3402	3484	6318	4202	3804	5318	9686	3998	1886	1752	2354	2488	2096	1818	4858	4130	4262	9358	6676	8188	3488	3066	3416	3044	2748	3026	4042	3257.11	5554.33	2065.67	6245.33	3131.33	143420
d__Bacteria	k__unclassified_d__Bacteria	p__Cyanobacteriota	c__Cyanophyceae	o__Pleurocapsales	f__Xenococcaceae	g__unclassified_f__Xenococcaceae	1710	1482	1330	3206	2758	3468	3526	3816	3760	2926	3428	3310	4094	3264	2560	2148	2246	2108	25708	21832	7726	141050	16508	25278	6470	5896	5748	5440	6180	7652	3046	3060	2956	3220	3198	3300	1507.33	3355.33	2736.67	39683.7	6231	3130	345408
d__Bacteria	k__unclassified_d__Bacteria	p__Pseudomonadota	c__Betaproteobacteria	o__Nitrosomonadales	f__Gallionellaceae	g__Sideroxydans	3550	2324	2638	3144	2966	2972	3040	3150	2650	2928	3498	3030	4516	9460	3080	2948	4544	2448	1220	1084	1188	1254	2060	1156	2654	2488	2506	2016	2006	2400	3148	3016	3022	3476	3118	2994	2837.33	3042	4499.33	1327	2345	3129	103692
d__Bacteria	k__unclassified_d__Bacteria	p__Myxococcota	c__unclassified_p__Myxococcota	o__Polyangiales	f__Polyangiaceae	g__Minicystis	4310	3918	3086	9698	6808	7018	6812	8768	5448	12272	10554	10392	9972	23152	15364	12008	3850	25178	1678	1438	2036	1984	3786	2488	4018	2482	2564	16824	8262	13236	3202	2978	2858	3048	3596	3066	3771.33	8641.11	14920.7	2235	7897.67	3124.67	258152
d__Bacteria	k__unclassified_d__Bacteria	p__Pseudomonadota	c__Alphaproteobacteria	o__Minwuiales	f__Minwuiaceae	g__Minwuia	2290	1824	1754	9192	8040	8200	8184	9556	6654	7472	7352	6606	4938	3884	3060	2278	1578	3072	4840	4150	5282	5238	7320	5940	5344	5244	5518	3882	5728	5680	3212	3084	2918	3050	3310	3172	1956	7917.33	3135	5461.67	5232.67	3124.33	178846
d__Bacteria	k__unclassified_d__Bacteria	p__Bacteroidota	c__Flavobacteriia	o__Flavobacteriales	f__Flavobacteriaceae	g__Mangrovimonas	20108	11322	20562	3474	6304	12476	5620	6510	6314	2498	2380	4468	152710	89782	64274	334696	482512	152376	1528	1286	1228	2400	1088	1004	3532	3392	3408	3126	3514	4288	3628	3038	3296	2712	2702	3362	17330.7	5560.44	212725	1422.33	3543.33	3123	1426918
d__Bacteria	k__unclassified_d__Bacteria	p__Pseudomonadota	c__Gammaproteobacteria	o__Oceanospirillales	f__Pleioneaceae	g__Aliikangiella	4662	3982	3612	2470	2260	2784	2864	3500	2596	2396	2384	2326	3126	2522	2514	3214	3540	2126	3972	2898	4392	4842	4618	4534	5118	4986	5046	4446	6314	5828	3622	3162	3470	2702	2370	3202	4085.33	2620	2840.33	4209.33	5289.67	3088	128400
d__Bacteria	k__unclassified_d__Bacteria	p__Pseudomonadota	c__Alphaproteobacteria	o__Maricaulales	f__Maricaulaceae	g__Maricaulis	3344	2584	2462	2924	2716	2830	2892	3462	2658	2844	2794	2612	3130	2288	1908	2332	2602	1768	2354	1986	2788	3414	3506	2976	3114	3058	3124	2932	4186	4068	3354	2844	3120	3126	3130	2932	2796.67	2859.11	2338	2837.33	3413.67	3084.33	104162
d__Bacteria	k__unclassified_d__Bacteria	p__Acidobacteriota	c__Terriglobia	o__Terriglobales	f__Acidobacteriaceae	g__Candidatus_Sulfotelmatobacter	7830	5510	6314	9960	8556	10258	11246	13752	10018	15568	15886	12952	7338	5658	4006	4500	3392	5906	2720	2378	3136	1882	3742	3570	4388	4110	4180	7188	4648	7950	3074	3050	3142	3150	3196	2878	6551.33	12021.8	5133.33	2904.67	5410.67	3081.67	227032
d__Bacteria	k__unclassified_d__Bacteria	p__Actinomycetota	c__Actinomycetes	o__Micrococcales	f__Ruaniaceae	g__Occultella	394	592	256	744	656	686	834	878	794	694	662	772	1308	1036	800	732	510	560	840	924	1294	1734	586	600	1724	1678	1810	1104	1602	1798	3160	2774	2802	3434	3512	2792	414	746.667	824.333	996.333	1619.33	3079	47076
d__Bacteria	k__unclassified_d__Bacteria	p__Bacillota	c__Bacilli	o__Lactobacillales	f__Carnobacteriaceae	g__Trichococcus	542	864	186	90	96	122	114	140	124	142	140	100	316	172	184	392	416	314	96	84	112	146	64	48	150	166	148	220	112	202	910	356	554	412	15452	784	530.667	118.667	299	91.6667	166.333	3078	24470
d__Bacteria	k__unclassified_d__Bacteria	p__Bacillota	c__Bacilli	o__Bacillales	f__Paenibacillaceae	g__Brevibacillus	3326	2528	2798	3902	3332	3966	4224	4348	4418	4554	5046	4204	4058	3896	2890	3170	3106	3050	2226	1958	2514	2078	1834	1722	4872	4222	4566	4756	4400	6128	3102	3018	2842	2976	3374	3146	2884	4221.56	3361.67	2055.33	4824	3076.33	126550
d__Bacteria	k__unclassified_d__Bacteria	p__Thermodesulfobacteriota	c__Desulfuromonadia	o__Geobacterales	f__Geobacteraceae	g__Geotalea	4706	4894	4276	6740	6610	8768	10040	10828	10370	15502	17804	12742	4980	4200	3360	4284	3638	6262	4056	3332	3876	2154	2604	2024	4832	4448	4510	5462	4116	6480	2936	3046	2994	3286	3086	3106	4625.33	11044.9	4454	3007.67	4974.67	3075.67	206352
d__Bacteria	k__unclassified_d__Bacteria	p__Pseudomonadota	c__Gammaproteobacteria	o__Cellvibrionales	f__Cellvibrionaceae	g__Marinimicrobium	2858	1870	2096	2188	2662	3990	3284	6016	2304	1808	1918	2850	2090	1548	1544	1676	1614	1712	1502	1344	1604	2216	1960	2024	3342	3452	3422	2534	3246	3346	3356	3292	3198	2718	2540	3342	2274.67	3002.22	1697.33	1775	3223.67	3074.33	92466
d__Bacteria	k__unclassified_d__Bacteria	p__Pseudomonadota	c__Betaproteobacteria	o__Nitrosomonadales	f__Thiobacillaceae	g__Parasulfuritortus	1662	1588	1330	794	736	790	908	966	902	786	1042	918	2156	1516	1332	1298	1342	1080	380	352	456	290	558	348	1086	986	980	700	920	922	3050	2898	2876	3598	3210	2810	1526.67	871.333	1454	397.333	932.333	3073.67	47566
d__Bacteria	k__unclassified_d__Bacteria	p__Bacillota	c__Clostridia	o__Eubacteriales	f__Desulfotomaculaceae	g__Desulfotomaculum	3150	2566	2686	3436	2992	3972	4214	4136	4772	4948	5682	4750	3638	3634	2690	2844	2758	3144	2618	2280	2618	1498	1484	1170	4062	3586	3782	5440	3396	6368	3076	2994	2944	3202	3124	3082	2800.67	4322.44	3118	1944.67	4439	3070.33	122736
d__Bacteria	k__unclassified_d__Bacteria	p__Pseudomonadota	c__Betaproteobacteria	o__Burkholderiales	f__unclassified_o__Burkholderiales	g__Paucibacter	9898	5966	7112	2024	1750	2176	2252	2786	2102	2568	2620	2734	9508	5214	4612	3724	3560	1986	1182	996	1196	1462	1522	1084	2104	1956	1998	1776	2166	2354	3332	2840	2952	3330	3030	2928	7658.67	2334.67	4767.33	1240.33	2059	3068.67	110800
d__Bacteria	k__unclassified_d__Bacteria	p__Candidatus_Auribacterota	c__unclassified_p__Candidatus_Auribacterota	o__unclassified_p__Candidatus_Auribacterota	f__unclassified_p__Candidatus_Auribacterota	g__unclassified_p__Candidatus_Auribacterota	4148	3256	3604	5488	5172	6700	7256	7902	7306	9090	10012	7568	4878	4630	3362	3820	3854	4176	3416	2796	3754	2012	2558	2098	6256	5216	5224	11578	6344	11254	3066	2940	2848	3192	3158	3198	3669.33	7388.22	4120	2772.33	7645.33	3067	183130
d__Bacteria	k__unclassified_d__Bacteria	p__Pseudomonadota	c__Betaproteobacteria	o__Nitrosomonadales	f__Sulfuricellaceae	g__Sulfuriferula	4824	3070	3422	3410	3206	3180	3368	3484	2864	3600	3996	3454	4884	3036	3012	2784	2488	2366	1362	1196	1302	1422	2236	1418	3408	3416	3626	2138	2410	3032	3274	3018	2836	3318	2944	2998	3772	3395.78	3095	1489.33	3005	3064.67	105802
d__Bacteria	k__unclassified_d__Bacteria	p__Pseudomonadota	c__Alphaproteobacteria	o__Rhodobacterales	f__Roseobacteraceae	g__Mameliella	4220	2690	3376	3286	2738	3442	3376	4330	3386	3272	3416	3740	5620	2968	2586	4146	5076	3430	3736	3246	2672	6086	4258	3526	3040	2916	3112	2560	4392	4034	3282	2808	3058	2960	3240	3028	3428.67	3442.89	3971	3920.67	3342.33	3062.67	127052
d__Bacteria	k__unclassified_d__Bacteria	p__Actinomycetota	c__Actinomycetes	o__Streptosporangiales	f__Thermomonosporaceae	g__Thermostaphylospora	678	604	462	398	350	468	524	564	546	562	568	486	688	452	390	352	224	290	626	606	1042	1336	452	410	972	978	996	638	1098	1054	3122	2826	2804	3206	3702	2694	581.333	496.222	399.333	745.333	956	3059	37168
d__Bacteria	k__unclassified_d__Bacteria	p__Pseudomonadota	c__Alphaproteobacteria	o__Hyphomicrobiales	f__Phyllobacteriaceae	g__Phyllobacterium	2614	1850	2072	6340	5468	6004	6190	8080	5174	6438	6380	5718	4546	3250	2502	2628	2182	2466	2044	1574	2026	2070	3826	2434	2746	2490	2582	1784	2804	3100	2900	2608	2898	3208	3866	2860	2178.67	6199.11	2929	2329	2584.33	3056.67	127722
d__Bacteria	k__unclassified_d__Bacteria	p__Pseudomonadota	c__Alphaproteobacteria	o__Hyphomicrobiales	f__Aurantimonadaceae	g__Aurantimonas	2420	2070	2070	9370	7886	8800	9334	11566	7392	8822	8594	8216	5584	4092	3530	3218	2432	3312	3100	2504	3142	3298	4546	3376	4384	4084	4230	3224	4564	4702	3030	2738	2886	3216	3554	2856	2186.67	8886.67	3694.67	3327.67	4198	3046.67	172142
d__Bacteria	k__unclassified_d__Bacteria	p__Pseudomonadota	c__Betaproteobacteria	o__Burkholderiales	f__Oxalobacteraceae	g__Herbaspirillum	10986	6298	7764	4114	3704	4062	4200	4618	3556	4570	4500	3978	11328	6798	5884	3494	3310	2512	1568	1406	1880	1632	2110	2250	2348	2146	2268	2612	2300	2940	3266	2896	2994	3252	2968	2840	8349.33	4144.67	5554.33	1807.67	2435.67	3036	139352
d__Bacteria	k__unclassified_d__Bacteria	p__Actinomycetota	c__Actinomycetes	o__Micromonosporales	f__Micromonosporaceae	g__Couchioplanes	290	412	210	818	788	742	796	744	712	760	770	836	1034	816	558	496	308	494	576	606	974	1280	502	402	1056	946	1004	900	1116	1248	3330	2684	2692	3496	3584	2426	304	774	617.667	723.333	1045	3035.33	40406
d__Bacteria	k__unclassified_d__Bacteria	p__Pseudomonadota	c__Alphaproteobacteria	o__Hyphomicrobiales	f__Nitrobacteraceae	g__Variibacter	3488	3158	2812	17020	14194	16026	16954	21662	12690	18370	18160	15542	6816	5424	4208	3068	2124	5222	1750	1484	1712	2096	2368	1742	2124	1994	2038	1582	2240	2396	2942	2892	2972	3278	3182	2940	3152.67	16735.3	4477	1858.67	2062.33	3034.33	228670
d__Bacteria	k__unclassified_d__Bacteria	p__Pseudomonadota	c__Alphaproteobacteria	o__Rhodospirillales	f__Elioraeaceae	g__Elioraea	3964	2472	2860	6646	5994	5838	5594	6304	4296	4934	4994	4362	6214	4352	3562	2646	2158	2598	2592	2040	2496	2728	3968	3054	3152	2934	2970	2974	3718	4122	3118	2896	2934	3168	3118	2968	3098.67	5440.22	3588.33	2813	3311.67	3033.67	134738
d__Bacteria	k__unclassified_d__Bacteria	p__Pseudomonadota	c__Gammaproteobacteria	o__Oceanospirillales	f__Hahellaceae	g__Hahella	2256	1708	1760	2934	3274	5014	3822	4926	3598	3166	3150	3942	2754	2614	2380	2060	1784	2748	2254	1890	2294	2954	2764	2482	3592	3250	3158	2774	3074	3846	3224	3094	3214	2962	2612	3058	1908	3758.44	2390	2439.67	3282.33	3027.33	106386
d__Bacteria	k__unclassified_d__Bacteria	p__Pseudomonadota	c__Alphaproteobacteria	o__Rhodospirillales	f__Rhodospirillaceae	g__Ferruginivarius	2658	1822	2002	16446	13748	13262	11370	13370	8302	9304	8636	8202	7050	5986	4068	2864	1732	3570	5862	3810	6030	2770	18076	12868	3232	2874	3220	2408	3014	3528	3068	2912	2874	2978	3146	3166	2160.67	11404.4	4211.67	8236	3046	3024	220228
d__Bacteria	k__unclassified_d__Bacteria	p__Verrucomicrobiota	c__Spartobacteria	o__Chthoniobacterales	f__Chthoniobacteraceae	g__Chthoniobacter	3496	6554	2528	57816	40594	54324	67450	102388	76812	77566	85568	102246	17868	11906	8688	4868	4690	7486	1390	1340	1542	1754	1994	1588	2730	2328	2270	3280	3120	4304	3110	2674	3016	3006	3200	3078	4192.67	73862.7	9251	1601.33	3005.33	3014	778572
d__Bacteria	k__unclassified_d__Bacteria	p__Chloroflexota	c__Ktedonobacteria	o__Thermogemmatisporales	f__Thermogemmatisporaceae	g__Thermogemmatispora	3330	2654	2682	4316	4286	5084	5116	5000	5420	5726	6104	5422	4818	4166	2890	2884	1796	3008	2160	2064	2440	1890	1614	1618	3312	3182	3132	2952	2560	4346	2980	2992	2684	3150	3282	2954	2888.67	5163.78	3260.33	1964.33	3247.33	3007	124014
d__Bacteria	k__unclassified_d__Bacteria	p__Actinomycetota	c__Actinomycetes	o__Micrococcales	f__Microbacteriaceae	g__Agrococcus	542	458	312	770	760	1000	790	858	1036	998	870	1264	1930	1058	1168	870	518	1022	748	726	1094	1514	552	526	1622	1778	1994	1180	1696	1996	3144	2814	2644	3316	3474	2630	437.333	927.333	1094.33	860	1711	3003.67	49672
d__Bacteria	k__unclassified_d__Bacteria	p__Pseudomonadota	c__Alphaproteobacteria	o__Rhodobacterales	f__Paracoccaceae	g__Halovulum	17386	6104	10970	4048	3614	4218	4246	6086	3810	4154	4050	4612	5788	3142	2730	3326	2622	3152	4682	2742	2500	5482	7316	7004	3006	3020	3428	2096	3408	3478	3114	2500	2848	3136	3566	2850	11486.7	4315.33	3460	4954.33	3072.67	3002.33	160234
d__Bacteria	k__unclassified_d__Bacteria	p__Actinomycetota	c__Actinomycetes	o__Micrococcales	f__Promicromonosporaceae	g__Promicromonospora	648	620	458	1072	994	1350	1092	1248	1324	1188	1056	1414	1354	1006	908	694	362	1336	990	982	1296	1918	914	778	1508	1634	1718	1310	1928	2078	3070	2744	2774	3320	3472	2612	575.333	1193.11	943.333	1146.33	1696	2998.67	53170
d__Bacteria	k__unclassified_d__Bacteria	p__Bacteroidota	c__Sphingobacteriia	o__Sphingobacteriales	f__Sphingobacteriaceae	g__Mucilaginibacter	4572	2888	3716	3720	3162	3756	3642	4312	3554	3748	3896	3648	5254	3744	3168	4680	8032	3366	1920	1656	2014	2120	1922	1572	5686	4972	5062	10174	7064	9464	3074	2952	3060	2952	2966	2972	3725.33	3715.33	4707.33	1867.33	7070.33	2996	144460
d__Bacteria	k__unclassified_d__Bacteria	p__Pseudomonadota	c__Gammaproteobacteria	o__Oceanospirillales	f__Alcanivoracaceae	g__Marinicella	3670	2990	2834	3046	2660	3148	2944	3430	3062	2742	3136	2602	4732	3628	3222	5476	5046	3616	4220	3242	4422	5652	4490	4624	7008	6172	6568	7122	8036	8424	3342	3086	3388	2512	2582	3058	3164.67	2974.44	4286.67	4441.67	7221.67	2994.67	149932
d__Bacteria	k__unclassified_d__Bacteria	p__Bacillota	c__Clostridia	o__Eubacteriales	f__Desulfitobacteriaceae	g__Desulfosporosinus	3952	3652	3622	4444	3926	5524	5666	5452	6932	5526	6946	5580	4284	3968	2890	3642	3728	3848	3386	2922	3638	1714	1696	1228	4782	4418	4370	6322	4210	7220	2834	2958	2804	3020	3120	3180	3742	5555.11	3726.67	2430.67	5220.33	2986	147404
d__Bacteria	k__unclassified_d__Bacteria	p__Bacteroidota	c__Cytophagia	o__Cytophagales	f__Cytophagaceae	g__Spirosoma	4334	2690	3294	3682	3230	3714	3878	4392	4048	4168	4290	3982	5670	3964	3434	4280	5784	3240	2396	2250	2622	2396	2216	1918	4236	4246	4070	6302	5648	6512	3104	2940	3168	2632	2862	3192	3439.33	3931.56	4395.33	2299.67	5169	2983	134784
d__Bacteria	k__unclassified_d__Bacteria	p__Thermodesulfobacteriota	c__Desulfobacteria	o__Desulfobacterales	f__Desulfosudaceae	g__Desulfosudis	2526	1996	2314	2610	2282	3264	3924	2920	5242	3234	4622	3282	3492	3576	2824	3056	5164	2750	3490	3060	2978	1186	2176	1402	7622	5880	5888	24704	9804	14770	3088	2912	2654	3136	2986	3090	2278.67	3486.67	3477	2382	11444.7	2977.67	159904
d__Bacteria	k__unclassified_d__Bacteria	p__Pseudomonadota	c__Gammaproteobacteria	o__Cellvibrionales	f__Spongiibacteraceae	g__Dasania	2616	1822	1810	1126	1130	1460	1412	2012	1256	1030	1104	1286	870	830	694	718	1014	610	1112	856	1510	1546	1374	1622	1606	1868	1998	1224	1616	1522	3442	3412	3142	2402	2214	3226	2082.67	1312.89	789.333	1336.67	1639	2973	58492
d__Bacteria	k__unclassified_d__Bacteria	p__Pseudomonadota	c__Gammaproteobacteria	o__Xanthomonadales	f__Xanthomonadaceae	g__Rehaibacterium	2498	1754	1758	678	600	760	840	914	774	792	838	636	3648	2508	2188	2958	3344	2128	852	742	1002	1212	1194	1066	1560	1400	1442	1542	2028	1956	3186	2808	2860	3212	2946	2768	2003.33	759.111	2795.67	1011.33	1654.67	2963.33	63392
d__Bacteria	k__unclassified_d__Bacteria	p__Bacteroidota	c__Flavobacteriia	o__Flavobacteriales	f__Flavobacteriaceae	g__Arenibacter	6268	6502	5026	1774	1582	2210	2302	2468	2506	1532	1884	2036	3570	2294	2018	4056	6804	4568	2460	2230	2240	4148	1832	1578	4102	3976	4150	5056	5242	6068	3030	2810	2960	2764	3182	3026	5932	2032.67	3885	2414.67	4765.67	2962	120254
d__Bacteria	k__unclassified_d__Bacteria	p__Pseudomonadota	c__Gammaproteobacteria	o__Xanthomonadales	f__Rhodanobacteraceae	g__Aquimonas	3786	2738	2510	1090	884	1168	1222	1416	1248	1268	1350	1240	5240	3374	2926	3820	4740	2576	1430	1298	1740	2408	1660	1752	2668	2464	2624	3160	3446	3502	3114	2908	2980	3078	2786	2900	3011.33	1209.56	3779.33	1714.67	2977.33	2961	88514
d__Bacteria	k__unclassified_d__Bacteria	p__Thermodesulfobacteriota	c__Desulfovibrionia	o__Desulfovibrionales	f__Desulfonatronaceae	g__Desulfonatronum	2008	1622	1676	2052	2004	2526	2774	2722	3454	2530	3002	2500	4102	3666	3000	2606	3580	2338	2838	2362	2576	1570	1900	1320	3148	2546	2590	5088	3250	5664	2934	2770	2646	3136	3156	3088	1768.67	2618.22	3215.33	2094.33	3714.33	2955	100744
d__Bacteria	k__unclassified_d__Bacteria	p__Pseudomonadota	c__Betaproteobacteria	o__Nitrosomonadales	f__Usitatibacteraceae	g__Usitatibacter	9410	5576	6628	4464	4104	3670	4018	3994	2944	4324	4554	3458	9382	5666	5142	3156	2948	2226	978	660	672	1204	1568	1604	1332	1260	1298	1198	1332	1644	3112	2952	2850	3194	2852	2762	7204.67	3947.78	4753.33	1114.33	1344	2953.67	118136
d__Bacteria	k__unclassified_d__Bacteria	p__Chloroflexota	c__Anaerolineae	o__Anaerolineales	f__Anaerolineaceae	g__Flexilinea	3446	3030	3210	2652	2656	3514	3544	3344	4384	3270	3884	3524	5408	4652	3260	6074	6684	4802	2714	2506	3128	1968	1224	1224	3946	3130	3370	3642	2650	4930	3012	2804	2608	3032	3034	3008	3228.67	3419.11	5146.67	2127.33	3611.33	2916.33	123268
d__Archaea	k__unclassified_d__Archaea	p__Euryarchaeota	c__Halobacteria	o__Haloferacales	f__Haloferacaceae	g__Haloferax	2406	1666	1830	3412	2864	3894	3740	3770	4234	3738	4036	3592	3628	2946	2208	1744	1218	1926	2736	2462	3278	3374	2126	2232	4272	4046	3812	3238	3462	4548	2988	3006	2664	2836	3018	2952	1967.33	3697.78	2278.33	2701.33	3896.33	2910.67	109902
d__Bacteria	k__unclassified_d__Bacteria	p__Pseudomonadota	c__Gammaproteobacteria	o__Chromatiales	f__Chromatiaceae	g__Rheinheimera	2512	1774	1770	1522	1592	2260	1874	2216	1674	1474	1618	1752	3208	2336	2044	2324	2416	1824	1756	1410	1976	2348	1996	2254	2350	2154	2416	2518	2870	2918	3068	2806	2932	3126	2604	2876	2018.67	1775.78	2358.67	1956.67	2537.67	2902	80568
d__Bacteria	k__unclassified_d__Bacteria	p__Pseudomonadota	c__Gammaproteobacteria	o__Chromatiales	f__Thioalkalispiraceae	g__Thiohalophilus	2574	1988	2204	2190	1888	2160	2388	2240	2202	2456	2670	2466	2494	2322	3576	2118	3430	2824	5754	4264	5088	4074	10810	4412	7456	7472	8072	4760	5184	6088	3184	2940	3264	2600	2458	2960	2255.33	2295.56	2794	5733.67	6505.33	2901	135030
d__Bacteria	k__unclassified_d__Bacteria	p__Pseudomonadota	c__Alphaproteobacteria	o__Rhodospirillales	f__Stellaceae	g__Stella	2812	1868	2002	10894	9374	8838	8280	9466	5818	6520	6438	5880	4992	4300	2754	2000	1548	2576	2660	2244	2902	3218	5336	4714	2844	2710	2754	2566	3024	3608	3148	2638	2750	2942	3118	2760	2227.33	7945.33	3028.33	3512.33	2917.67	2892.67	152296
d__Bacteria	k__unclassified_d__Bacteria	p__Pseudomonadota	c__Betaproteobacteria	o__Nitrosomonadales	f__Sterolibacteriaceae	g__Sulfurisoma	2480	1726	1944	1092	1042	976	1036	1078	862	1012	1302	952	1784	1262	1088	694	804	650	292	242	390	408	460	350	536	522	504	508	466	610	3160	2978	2708	3294	2746	2464	2050	1039.11	1047	357	524.333	2891.67	44422
d__Bacteria	k__unclassified_d__Bacteria	p__Verrucomicrobiota	c__Opitutae	o__Opitutales	f__Opitutaceae	g__Lacunisphaera	3530	3016	2466	4218	3488	4106	4696	5452	4342	5224	5716	4992	5722	4240	3598	3588	3486	2720	1634	1316	1700	1510	1962	1724	2906	2678	2614	3690	3354	4376	2948	2848	2774	2902	3040	2808	3004	4692.67	3892.33	1641	3269.67	2886.67	121384
d__Bacteria	k__unclassified_d__Bacteria	p__Actinomycetota	c__Actinomycetes	o__Streptosporangiales	f__Streptosporangiaceae	g__Herbidospora	602	654	436	1006	856	842	1046	942	938	1054	958	848	1088	846	872	432	332	472	826	802	1194	1702	810	608	1552	1458	1672	1096	1730	1740	3074	2716	2626	3090	3342	2454	564	943.333	673.667	990.333	1541.33	2883.67	46716
d__Bacteria	k__unclassified_d__Bacteria	p__Pseudomonadota	c__Alphaproteobacteria	o__Hyphomicrobiales	f__Salinarimonadaceae	g__Salinarimonas	1734	1402	1220	3546	3054	3344	3660	4230	2944	3404	3444	3170	5872	4092	3246	2518	2242	1966	1884	1806	2166	2486	2470	1932	2290	2094	2238	1630	2494	2604	2888	2658	2760	3128	3240	2560	1452	3421.78	3322.67	2124	2225	2872.33	98416
d__Bacteria	k__unclassified_d__Bacteria	p__Actinomycetota	c__Actinomycetes	o__Propionibacteriales	f__Propionibacteriaceae	g__Nigerium	546	308	342	214	154	266	234	244	356	232	228	296	510	416	332	356	240	306	670	810	924	1296	464	332	1026	1112	1156	842	1344	1404	2782	2692	2482	3248	3396	2634	398.667	247.111	360	749.333	1147.33	2872.33	34194
d__Bacteria	k__unclassified_d__Bacteria	p__Pseudomonadota	c__Alphaproteobacteria	o__Rhodospirillales	f__Rhodospirillaceae	g__Caenispirillum	2266	1624	1668	6038	5270	5420	4730	5732	3736	4016	4104	3768	3784	3278	2394	2204	1834	2446	2348	1738	2442	2372	4376	3466	2604	2468	2400	2092	2730	3074	3128	2738	2656	3098	2962	2646	1852.67	4757.11	2656.67	2790.33	2561.33	2871.33	113650
d__Bacteria	k__unclassified_d__Bacteria	p__Thermodesulfobacteriota	c__Desulfovibrionia	o__Desulfovibrionales	f__Desulfomicrobiaceae	g__Desulfomicrobium	2106	2022	2022	1938	1454	2128	2070	2106	2598	2150	2578	2228	3764	3186	2844	3048	8494	2242	2486	2018	2068	1482	1814	1212	3974	3506	3686	4174	3514	5178	2866	2814	2672	3030	2852	2972	2050	2138.89	3929.67	1846.67	4005.33	2867.67	101296
d__Bacteria	k__unclassified_d__Bacteria	p__Myxococcota	c__unclassified_p__Myxococcota	o__Polyangiales	f__Polyangiaceae	g__Chondromyces	4486	3650	2966	6858	5554	5434	5590	7158	4324	7944	7046	7276	6242	11212	10282	6562	3636	10810	1796	1546	2376	2286	3178	3018	3666	2430	2474	12668	6550	10648	2938	2864	2682	3078	3038	2590	3700.67	6353.78	8124	2366.67	6406	2865	186856
d__Bacteria	k__unclassified_d__Bacteria	p__Planctomycetota	c__Planctomycetia	o__Gemmatales	f__Gemmataceae	g__Fimbriiglobus	1796	1930	1402	6230	4758	4934	4962	6690	3934	5176	5774	5102	35420	22770	15068	7352	9190	4326	1312	1096	1558	1504	2396	2388	2092	1848	1874	2678	2486	3404	2926	2624	2756	2950	3050	2848	1709.33	5284.44	15687.7	1709	2397	2859	188604
d__Bacteria	k__unclassified_d__Bacteria	p__Candidatus_Glassbacteria	c__unclassified_p__Candidatus_Glassbacteria	o__unclassified_p__Candidatus_Glassbacteria	f__unclassified_p__Candidatus_Glassbacteria	g__unclassified_p__Candidatus_Glassbacteria	6006	4108	4812	5288	4710	5710	5956	6608	5882	7242	7946	6084	4044	3880	2962	2992	3016	3452	3520	2942	3894	2338	3450	3276	5692	5262	5360	9486	6242	9540	2724	2852	2686	2806	3066	3012	4975.33	6158.44	3391	3236.67	6930.33	2857.67	168846
d__Bacteria	k__unclassified_d__Bacteria	p__Cyanobacteriota	c__Cyanophyceae	o__Synechococcales	f__Synechococcaceae	g__Vulcanococcus	212	302	220	228	224	224	238	248	272	282	246	238	1218	724	638	1086	1122	558	4192	4254	4158	3642	4208	2732	1710	1068	1142	1358	2788	2202	2296	2480	2124	3234	4930	2062	244.667	244.444	891	3864.33	1711.33	2854.33	58860
d__Bacteria	k__unclassified_d__Bacteria	p__Acidobacteriota	c__Terriglobia	o__Terriglobales	f__Acidobacteriaceae	g__Edaphobacter	5990	4044	4550	8650	7228	7974	8762	10792	7598	11574	11952	9702	5654	5074	4170	3958	3216	4904	2630	2422	3174	2292	3186	2652	4780	4642	4544	5438	4562	7008	2664	2882	2672	3028	2936	2840	4861.33	9359.11	4496	2726	5162.33	2837	190144
d__Archaea	k__unclassified_d__Archaea	p__Candidatus_Thermoplasmatota	c__Candidatus_Poseidoniia	o__Candidatus_Poseidoniales	f__unclassified_o__Candidatus_Poseidoniales	g__unclassified_o__Candidatus_Poseidoniales	2794	2080	2278	5688	5052	5654	6074	6334	5372	6248	6344	5326	4752	4092	3190	2526	1950	2792	2670	2444	3360	2870	2622	2532	3938	3698	3896	3458	3872	4828	2824	2760	2770	2872	2922	2822	2384	5788	3217	2749.67	3948.33	2828.33	135704
d__Bacteria	k__unclassified_d__Bacteria	p__Pseudomonadota	c__Alphaproteobacteria	o__Rhodobacterales	f__Paracoccaceae	g__Marimonas	2558	1540	2216	872	842	1212	1138	1230	1148	918	1088	1196	2194	1230	1178	1602	1420	1170	1728	1424	1526	3128	1512	1428	4072	2868	3834	1956	2706	3116	2836	2350	2718	2998	3348	2706	2104.67	1071.56	1465.67	1791	3092	2826	71006
d__Bacteria	k__unclassified_d__Bacteria	p__Candidatus_Coatesbacteria	c__unclassified_p__Candidatus_Coatesbacteria	o__unclassified_p__Candidatus_Coatesbacteria	f__unclassified_p__Candidatus_Coatesbacteria	g__unclassified_p__Candidatus_Coatesbacteria	3502	2480	3030	4060	3544	5014	5214	5428	5378	5624	6150	5134	3950	4158	2900	3058	3224	3486	3206	2752	3500	1674	1834	1598	4896	3984	3944	8572	4966	8484	2914	2672	2516	2984	2976	2886	3004	5060.67	3462.67	2427.33	5807.67	2824.67	141692
d__Archaea	k__unclassified_d__Archaea	p__Candidatus_Altiarchaeota	c__unclassified_p__Candidatus_Altiarchaeota	o__Candidatus_Altiarchaeales	f__unclassified_o__Candidatus_Altiarchaeales	g__unclassified_o__Candidatus_Altiarchaeales	2524	2364	2374	2820	2560	3528	3800	3748	4154	3370	3800	3352	3592	3596	2666	2976	5262	2572	3602	2950	3864	2140	4000	1648	4958	4178	4020	5054	3744	6224	2824	2784	2616	2894	2916	2876	2420.67	3459.11	3444	3034	4696.33	2818.33	122350
d__Bacteria	k__unclassified_d__Bacteria	p__Pseudomonadota	c__Alphaproteobacteria	o__Rhodobacterales	f__Paracoccaceae	g__Limimaricola	3724	2424	2442	1848	1572	2008	2010	2538	1926	1904	1948	2536	4940	3222	2572	2150	2140	1518	1812	1328	1266	3204	2220	2080	1524	1564	1638	1106	1720	1812	2904	2458	2668	3078	3102	2652	2863.33	2032.22	2757	1985	1560.67	2810.33	81558
d__Bacteria	k__unclassified_d__Bacteria	p__Pseudomonadota	c__Betaproteobacteria	o__Nitrosomonadales	f__Sterolibacteriaceae	g__Methyloversatilis	4684	3018	3490	3300	2758	2552	2908	3140	2258	2834	2970	2610	7150	4586	4178	3016	2900	1854	1096	1008	1172	1904	1726	1514	2032	1938	1826	1688	2146	2282	3096	2838	2744	2988	2734	2406	3730.67	2814.44	3947.33	1403.33	1985.33	2801	97344
d__Bacteria	k__unclassified_d__Bacteria	p__Actinomycetota	c__Actinomycetes	o__Propionibacteriales	f__Nocardioidaceae	g__Propionicicella	132	278	120	90	86	118	76	90	164	114	90	138	216	228	110	82	46	104	336	390	508	652	194	150	714	782	796	486	696	764	2996	2552	2630	2992	3252	2326	176.667	107.333	131	371.667	706.333	2791.33	25498
d__Bacteria	k__unclassified_d__Bacteria	p__Actinomycetota	c__Actinomycetes	o__Mycobacteriales	f__unclassified_o__Mycobacteriales	g__Tomitella	144	220	118	564	398	542	438	504	392	436	364	416	458	368	254	298	196	236	610	708	966	1188	496	410	1222	1276	1360	1020	1534	1352	3090	2442	2552	2998	3384	2276	160.667	450.444	301.667	729.667	1294	2790.33	35230
d__Bacteria	k__unclassified_d__Bacteria	p__Pseudomonadota	c__Betaproteobacteria	o__Burkholderiales	f__Sphaerotilaceae	g__Methylibium	19708	11846	13644	2628	2374	2560	2954	3734	2558	3200	3634	3494	7348	4400	3846	2456	2846	1530	1392	1300	1532	1908	1736	1586	2514	2416	2488	2274	2420	2800	2820	2750	2786	2982	2670	2634	15066	3015.11	3737.67	1575.67	2485.33	2773.67	135768
d__Bacteria	k__unclassified_d__Bacteria	p__Actinomycetota	c__Actinomycetes	o__Micrococcales	f__unclassified_o__Micrococcales	g__Pengzhenrongella	186	262	114	330	306	374	340	328	362	294	244	380	366	296	254	266	196	216	586	612	854	1220	408	338	930	1092	1106	766	1108	1376	2952	2416	2588	3030	3320	2306	187.333	328.667	265.667	669.667	1063	2768.67	32122
d__Bacteria	k__unclassified_d__Bacteria	p__Pseudomonadota	c__Gammaproteobacteria	o__Xanthomonadales	f__Rhodanobacteraceae	g__Chiayiivirga	2112	1564	1556	1084	1020	1190	1214	1468	1158	1124	1170	1018	3618	2546	2136	3174	3418	3622	1822	1452	1746	1898	1772	1680	2472	2070	2164	2200	3006	2956	3080	2808	2846	2862	2380	2596	1744	1160.67	3085.67	1728.33	2478	2762	76002
d__Bacteria	k__unclassified_d__Bacteria	p__Pseudomonadota	c__Alphaproteobacteria	o__Rhodobacterales	f__Paracoccaceae	g__Maliponia	2394	1502	1750	782	730	928	956	1316	894	882	966	1138	3014	1736	1560	2014	2514	1474	1100	812	866	2372	1192	1264	746	812	902	530	1012	962	2804	2378	2576	2916	3380	2512	1882	954.667	2052	1267.67	827.333	2761	55686
d__Bacteria	k__unclassified_d__Bacteria	p__Pseudomonadota	c__Alphaproteobacteria	o__Hyphomicrobiales	f__Hyphomicrobiaceae	g__Methyloligella	1862	1658	1380	22052	17964	18616	18762	21588	14886	17778	17084	14542	9936	6544	3984	3678	1718	6884	3220	2642	3266	3000	5032	3720	4618	4324	4668	3782	4294	5416	2708	2478	2564	2894	3236	2682	1633.33	18141.3	5457.33	3480	4517	2760.33	265460
d__Bacteria	k__unclassified_d__Bacteria	p__Candidatus_Fraserbacteria	c__unclassified_p__Candidatus_Fraserbacteria	o__unclassified_p__Candidatus_Fraserbacteria	f__unclassified_p__Candidatus_Fraserbacteria	g__unclassified_p__Candidatus_Fraserbacteria	3644	3052	3236	4814	4468	5542	6188	5978	6464	6380	7128	6020	5410	5060	3374	3444	2406	3752	2524	2258	3014	1602	1774	1520	4350	3792	3744	3726	3222	4404	2828	2696	2380	2866	2936	2828	3310.67	5886.89	3907.67	2115.33	3873	2755.67	138824
d__Bacteria	k__unclassified_d__Bacteria	p__Pseudomonadota	c__Alphaproteobacteria	o__Rhodobacterales	f__Paracoccaceae	g__Marinosulfonomonas	3778	2358	3012	1726	1516	1594	1582	2024	1424	1512	1578	1756	3606	2052	1838	1704	1842	1158	1598	1166	1168	2800	2370	2176	1874	2074	2472	1148	2046	2060	2766	2302	2464	3112	3352	2506	3049.33	1634.67	2033.33	1879.67	1945.67	2750.33	75514
d__Bacteria	k__unclassified_d__Bacteria	p__unclassified_d__Bacteria	c__Deltaproteobacteria	o__Bradymonadales	f__Lujinxingiaceae	g__Lujinxingia	1894	1476	1420	1916	1700	1824	2098	2194	1636	2342	2228	1988	3870	3670	4082	4308	13476	3292	1330	1378	1814	1720	2122	2070	2918	2258	2324	7544	4784	7030	2910	2570	2542	2844	2938	2652	1596.67	1991.78	5449.67	1739	4476.33	2742.67	109162
d__Bacteria	k__unclassified_d__Bacteria	p__Actinomycetota	c__Actinomycetes	o__Micrococcales	f__Micrococcaceae	g__Micrococcus	720	388	484	648	552	706	758	758	646	804	852	740	950	720	584	558	266	508	562	602	1000	1220	596	556	946	1068	1300	778	1172	1242	2970	2570	2620	2804	3186	2290	530.667	718.222	597.667	756	1084.33	2740	39124
d__Bacteria	k__unclassified_d__Bacteria	p__Actinomycetota	c__Actinomycetes	o__Micrococcales	f__Micrococcaceae	g__Sinomonas	820	876	608	1052	1000	1148	1262	1222	1302	1422	1296	1354	1168	862	688	622	394	808	744	814	1148	1506	544	450	1242	1410	1412	1052	1320	1556	2648	2534	2448	3062	3262	2354	768	1228.67	757	867.667	1332	2718	47410
d__Bacteria	k__unclassified_d__Bacteria	p__Bacteroidota	c__Cytophagia	o__Cytophagales	f__Roseivirgaceae	g__Roseivirga	5634	2746	4302	2414	2220	2552	2648	3128	2576	2366	2714	2262	4312	3030	2496	3662	6270	2722	2940	2416	3152	3052	4254	3082	5240	4428	4494	7146	7100	8126	3002	2788	2798	2302	2562	2814	4227.33	2542.22	3748.67	3149.33	6089	2711	129750
d__Bacteria	k__unclassified_d__Bacteria	p__Bacillota	c__Bacilli	o__Bacillales	f__Paenibacillaceae	g__Cohnella	2508	2080	1958	3800	3414	4244	4624	4696	4920	4698	5338	4724	3914	3478	2354	3070	2864	3004	2420	2216	2778	2518	1824	1342	3894	3950	3630	4922	3532	5406	2782	2442	2636	2932	2814	2658	2182	4495.33	3114	2183	4222.33	2710.67	120384
d__Bacteria	k__unclassified_d__Bacteria	p__Nitrospirota	c__Thermodesulfovibrionia	o__Thermodesulfovibrionales	f__Thermodesulfovibrionaceae	g__Thermodesulfovibrio	10200	6386	9406	4706	4656	6712	8114	8402	8432	12084	13826	9846	4158	3652	3138	3178	3060	4880	14672	8594	8388	2488	4542	2098	4336	3786	3766	7334	3868	7534	2678	2890	2532	2656	2588	2908	8664	8530.89	3677.67	6797	5104	2708.67	212494
d__Bacteria	k__unclassified_d__Bacteria	p__Deinococcota	c__Deinococci	o__Thermales	f__Thermaceae	g__Thermus	3434	2400	2690	4618	4088	4642	4728	5412	4764	5932	6120	5100	4322	3694	3146	3702	2510	3474	1946	1658	2070	2576	2050	2148	2766	2466	2672	3126	2780	4200	2806	2602	2602	2712	2832	2684	2841.33	5044.89	3474.67	2074.67	3001.67	2706.33	121472
d__Bacteria	k__unclassified_d__Bacteria	p__Pseudomonadota	c__Gammaproteobacteria	o__Alteromonadales	f__Ferrimonadaceae	g__Ferrimonas	2588	2286	1990	1566	1250	1562	1690	1716	1812	1472	1532	1426	1768	1638	1660	1448	1738	1042	3052	2580	3532	4144	3214	2952	4860	4740	5028	4044	5518	5442	2990	2916	2876	2218	2398	2824	2288	1558.44	1549	3245.67	4938.67	2703.67	95512
d__Bacteria	k__unclassified_d__Bacteria	p__Pseudomonadota	c__Alphaproteobacteria	o__Hyphomicrobiales	f__Rhizobiaceae	g__Agrobacterium	2288	1620	2116	4382	3782	4312	4298	5296	3660	4288	4436	4236	3804	2866	8806	2622	2200	2626	1932	1554	1890	2372	2538	2118	2454	2418	2656	1932	2808	2950	2758	2472	2438	2984	3068	2502	2008	4298.89	3820.67	2067.33	2536.33	2703.67	111482
d__Bacteria	k__unclassified_d__Bacteria	p__Pseudomonadota	c__Gammaproteobacteria	o__Oceanospirillales	f__Oleiphilaceae	g__Oleiphilus	2300	1704	1704	2298	2628	3576	2662	3786	2250	2150	2028	2886	2214	1860	1774	1806	2304	2084	2416	2090	2674	3170	3500	3332	4004	4356	4502	2970	3572	3662	2878	2918	2852	2568	2344	2638	1902.67	2696	2007	2863.67	3844.33	2699.67	98460
d__Bacteria	k__unclassified_d__Bacteria	p__Actinomycetota	c__Actinomycetes	o__Propionibacteriales	f__Nocardioidaceae	g__Solicola	282	290	198	450	410	522	452	532	520	556	480	468	822	690	594	412	280	558	806	644	1022	1226	436	332	1312	1422	1476	1074	1254	1576	2976	2602	2370	2920	2968	2360	256.667	487.778	559.333	744.333	1352.33	2699.33	37292
d__Bacteria	k__unclassified_d__Bacteria	p__Cyanobacteriota	c__Cyanophyceae	o__Gloeobacterales	f__Gloeobacteraceae	g__unclassified_f__Gloeobacteraceae	7164	54428	4388	3754	1960	3866	5864	10402	6400	12060	11508	20904	5372	2732	2462	1216	1162	928	502	430	526	604	852	422	716	656	746	734	1050	1186	2998	2218	2750	2306	3008	2906	21993.3	8524.22	2312	556	848	2697.67	181180
d__Bacteria	k__unclassified_d__Bacteria	p__Pseudomonadota	c__Alphaproteobacteria	o__Rhodobacterales	f__Paracoccaceae	g__Pararhodobacter	2854	2328	2282	2450	2104	2454	2522	3088	2284	2794	2806	2998	5082	3178	2826	3134	3150	2176	1458	1110	1192	2246	1852	1976	1494	1412	1504	1038	1618	1654	2764	2296	2416	3104	3070	2520	2488	2611.11	3257.67	1639	1453.33	2695	85234
d__Bacteria	k__unclassified_d__Bacteria	p__Pseudomonadota	c__Alphaproteobacteria	o__Emcibacterales	f__Emcibacteraceae	g__Emcibacter	5340	3880	3982	4856	4366	4584	4594	5136	4630	4478	5256	4290	3378	2798	2392	3178	3422	2136	2956	2352	3376	4540	5162	4678	5282	6076	5912	4390	5388	5274	3120	2720	2878	2380	2366	2690	4400.67	4687.78	2884	3844	5387	2692.33	144236
d__Bacteria	k__unclassified_d__Bacteria	p__Pseudomonadota	c__Betaproteobacteria	o__Burkholderiales	f__unclassified_o__Burkholderiales	g__Thiomonas	5314	3440	3712	1710	1616	1654	1914	1974	1596	1912	2124	1822	6148	3694	3348	2704	2836	1744	814	702	918	1156	1084	962	1590	1646	1694	1470	1610	1762	2798	2606	2606	3068	2630	2390	4155.33	1813.56	3412.33	939.333	1628.67	2683	80768
d__Bacteria	k__unclassified_d__Bacteria	p__Actinomycetota	c__Actinomycetes	o__Micrococcales	f__Intrasporangiaceae	g__Terracoccus	552	496	398	588	424	656	826	810	850	778	778	904	782	822	482	1084	426	2594	860	1070	1236	1714	694	578	1644	1760	1892	1322	1792	1924	2622	2454	2418	3042	3284	2274	482	734.889	1031.67	1025.33	1722.33	2682.33	46830
d__Bacteria	k__unclassified_d__Bacteria	p__Pseudomonadota	c__Gammaproteobacteria	o__Methylococcales	f__Methylococcaceae	g__Methylomagnum	2090	1622	1656	1882	1460	1830	1806	2212	1872	2058	2194	1866	2382	1674	1390	1408	1028	1082	1152	974	1190	1308	1236	1108	2192	2204	2458	1954	1918	2328	2756	2598	2562	2896	2682	2554	1789.33	1908.89	1494	1161.33	2175.67	2674.67	67582
d__Bacteria	k__unclassified_d__Bacteria	p__Cyanobacteriota	c__Cyanophyceae	o__Oscillatoriales	f__Oscillatoriaceae	g__Phormidium	1888	1438	1420	4108	3520	3876	3918	4296	3958	3352	3646	3554	3674	3076	2334	2528	2270	2290	4042	3180	3180	3680	4294	3590	4044	3758	3992	3028	3312	4208	2790	2554	2558	2676	2624	2810	1582	3803.11	2695.33	3661	3723.67	2668.67	115466
d__Bacteria	k__unclassified_d__Bacteria	p__Pseudomonadota	c__Gammaproteobacteria	o__Cellvibrionales	f__Cellvibrionaceae	g__Gilvimarinus	2550	1752	1864	2422	3202	5240	3760	6276	2460	2072	2034	3080	2144	1584	1456	1310	1278	1894	1924	1612	2030	2628	1982	1820	3354	3592	3808	2804	3744	3714	2822	2784	2800	2408	2486	2702	2055.33	3394	1611	1999.33	3502.67	2667	95392
d__Bacteria	k__unclassified_d__Bacteria	p__Planctomycetota	c__Planctomycetia	o__Gemmatales	f__Gemmataceae	g__Zavarzinella	1408	1612	1262	9118	6524	7376	7244	9706	6010	8692	9380	7272	8582	6044	4234	3484	2792	3892	1406	1288	1810	1598	2614	1982	2010	1772	1764	2430	2370	3230	2686	2574	2526	2698	2766	2738	1427.33	7924.67	4838	1783	2262.67	2664.67	144894
d__Bacteria	k__unclassified_d__Bacteria	p__Cyanobacteriota	c__Cyanophyceae	o__Oscillatoriales	f__Oscillatoriaceae	g__Okeania	2052	2032	1706	5130	4508	5586	5590	5654	5742	4776	5362	4956	3926	3692	2554	2670	2566	2732	6352	5786	3840	6460	4282	4172	4424	3818	4168	3816	3980	5010	2700	2522	2556	2698	2754	2746	1930	5256	3023.33	5148.67	4202.67	2662.67	143318
d__Bacteria	k__unclassified_d__Bacteria	p__Verrucomicrobiota	c__Opitutae	o__Puniceicoccales	f__Coraliomargaritaceae	g__Coraliomargarita	3498	11430	2350	3718	2854	3932	4470	6276	4964	4310	5062	5314	3798	2496	6454	2072	2530	1648	1848	1654	2154	1932	2298	1892	3498	2942	3150	3962	4202	5052	2654	2612	2734	2462	2698	2726	5759.33	4544.44	3166.33	1963	3801	2647.67	127646
d__Bacteria	k__unclassified_d__Bacteria	p__Pseudomonadota	c__Betaproteobacteria	o__Burkholderiales	f__Sphaerotilaceae	g__Sphaerotilus	4936	3114	3370	1154	1032	1246	1248	1516	1152	1212	1348	1444	5232	3186	2806	2980	3718	1534	838	724	1078	1364	1050	940	1822	1604	1686	1532	2040	1910	2914	2686	2696	2716	2404	2448	3806.67	1261.33	3242.67	999	1765.67	2644	74680
d__Bacteria	k__unclassified_d__Bacteria	p__Actinomycetota	c__Actinomycetes	o__Pseudonocardiales	f__Pseudonocardiaceae	g__Umezawaea	512	404	452	738	622	794	736	744	682	702	690	688	914	744	682	564	342	438	878	748	1276	1416	608	500	1798	1690	2064	1320	1848	2110	2784	2402	2482	2832	2990	2324	456	710.667	614	904.333	1805	2635.67	43518
d__Bacteria	k__unclassified_d__Bacteria	p__Thermodesulfobacteriota	c__Desulfuromonadia	o__Desulfuromonadales	f__Desulfuromonadaceae	g__Pelobacter	3440	4624	2944	3586	3068	4068	4592	3878	6726	4978	5760	4476	3252	2780	2294	2644	3462	2400	2686	2018	2362	2082	2234	2014	3950	3944	4292	4440	4282	5716	2744	2708	2840	2408	2302	2804	3669.33	4570.22	2805.33	2232.67	4437.33	2634.33	124798
d__Bacteria	k__unclassified_d__Bacteria	p__Pseudomonadota	c__Alphaproteobacteria	o__unclassified_c__Alphaproteobacteria	f__unclassified_c__Alphaproteobacteria	g__unclassified_c__Alphaproteobacteria	2274	1760	1674	7768	6738	6870	6762	8406	5342	6076	6124	5522	4198	3320	2470	2018	1764	2386	2792	2428	3018	3590	4974	3710	2826	2712	2712	2320	3126	3498	2774	2528	2370	2608	2786	2736	1902.67	6623.11	2692.67	3418.67	2865.67	2633.67	134980
d__Bacteria	k__unclassified_d__Bacteria	p__Pseudomonadota	c__Alphaproteobacteria	o__Hyphomicrobiales	f__Xanthobacteraceae	g__Ancylobacter	1664	1552	1346	6750	5434	5908	6532	7798	4836	6272	6432	5762	4152	3224	2492	2148	1700	2488	1754	1454	2076	1824	2204	1696	2328	2240	2276	1780	2548	2776	2620	2408	2556	2850	2924	2390	1520.67	6191.56	2700.67	1834.67	2324.67	2624.67	117194
d__Bacteria	k__unclassified_d__Bacteria	p__Actinomycetota	c__Actinomycetes	o__Micrococcales	f__Dermatophilaceae	g__Mobilicoccus	290	278	204	234	202	288	286	330	312	242	238	334	438	422	280	422	262	456	478	532	816	1062	372	298	860	962	994	692	918	1204	2874	2426	2276	2912	3108	2152	257.333	274	380	593	938.333	2624.67	30454
d__Bacteria	k__unclassified_d__Bacteria	p__Actinomycetota	c__Actinomycetes	o__Micromonosporales	f__Micromonosporaceae	g__Spirilliplanes	352	266	298	534	432	594	586	588	572	534	546	604	672	540	456	290	180	368	846	1012	1374	1658	688	506	1572	1594	1888	1358	1746	1936	2714	2406	2448	2822	3192	2144	305.333	554.444	417.667	1014	1682.33	2621	40316
d__Bacteria	k__unclassified_d__Bacteria	p__Candidatus_Hydrogenedentes	c__unclassified_p__Candidatus_Hydrogenedentes	o__unclassified_p__Candidatus_Hydrogenedentes	f__unclassified_p__Candidatus_Hydrogenedentes	g__Candidatus_Hydrogenedens	2060	1678	1656	1764	1524	1852	2008	2322	1960	2196	2424	2046	2122	1756	1412	1452	1618	1286	1502	1242	1896	1470	1542	1328	2508	2008	2180	3246	2570	3438	2828	2544	2418	2466	2762	2628	1798	2010.67	1607.67	1496.67	2658.33	2607.67	73712
d__Bacteria	k__unclassified_d__Bacteria	p__Actinomycetota	c__Actinomycetes	o__Mycobacteriales	f__Nocardiaceae	g__Williamsia	672	616	534	1320	1050	1496	1222	1328	1232	1310	1334	1498	1170	1036	820	804	618	768	716	634	1168	1146	684	526	1542	1456	1446	1168	1566	1862	2698	2478	2372	2870	2958	2260	607.333	1310	869.333	812.333	1506.67	2606	48378
d__Bacteria	k__unclassified_d__Bacteria	p__Cyanobacteriota	c__Cyanophyceae	o__Pseudanabaenales	f__Pseudanabaenaceae	g__Pseudanabaena	2112	1750	1774	3492	3156	3906	3984	4066	4114	3588	4060	3752	4428	3464	2972	3642	4478	3006	3102	2670	2272	4228	3014	2672	3228	2804	2990	3152	3056	3992	2642	2480	2450	2766	2712	2554	1878.67	3790.89	3665	2993	3203.67	2600.67	114528
d__Bacteria	k__unclassified_d__Bacteria	p__Pseudomonadota	c__Alphaproteobacteria	o__Hyphomicrobiales	f__Brucellaceae	g__Brucella	2238	1880	1832	4184	3680	3862	3730	4638	3348	3874	3918	3718	3938	2534	2702	2500	2354	2430	1874	1476	1832	2048	3326	2200	2432	2354	2494	1718	2434	2612	2458	2360	2328	2806	3090	2530	1983.33	3883.56	2743	2126	2340.67	2595.33	99732
d__Bacteria	k__unclassified_d__Bacteria	p__Myxococcota	c__Myxococcia	o__Myxococcales	f__Archangiaceae	g__Cystobacter	4922	3894	3524	6380	5406	5962	6264	9340	5142	8860	8398	7830	5822	6908	7700	4702	3244	8114	2448	2262	2736	2598	3086	2600	4402	3858	3666	9266	5630	8454	2694	2496	2590	2640	2560	2586	4113.33	7064.67	6081.67	2621.67	5879.33	2594.33	178984
d__Bacteria	k__unclassified_d__Bacteria	p__Balneolota	c__Balneolia	o__Balneolales	f__Balneolaceae	g__Rhodohalobacter	3200	2028	2560	3954	3616	4036	4144	4492	3984	4314	4684	3952	3894	3290	2392	3140	3812	2918	2920	2674	3066	3222	3310	2808	5492	5348	5628	7018	6678	8272	2838	2348	2548	2418	2726	2656	2596	4130.67	3241	3000	6406	2589	136380
d__Bacteria	k__unclassified_d__Bacteria	p__Actinomycetota	c__Actinomycetes	o__Pseudonocardiales	f__Pseudonocardiaceae	g__Actinosynnema	460	378	298	682	528	682	590	728	636	894	802	764	556	542	388	278	178	286	628	614	964	1106	462	408	1198	1196	1050	962	1270	1382	2690	2454	2358	2866	3038	2116	378.667	700.667	371.333	697	1176.33	2587	36432
d__Bacteria	k__unclassified_d__Bacteria	p__Candidatus_Wallbacteria	c__unclassified_p__Candidatus_Wallbacteria	o__unclassified_p__Candidatus_Wallbacteria	f__unclassified_p__Candidatus_Wallbacteria	g__unclassified_p__Candidatus_Wallbacteria	3778	2974	3080	4604	3840	4494	4928	5912	4486	6444	6856	5520	3818	3790	3140	3160	3242	3448	1836	1682	2304	1776	2646	2020	4422	3766	3906	8548	5242	8334	2612	2546	2520	2596	2762	2448	3277.33	5231.56	3433	2044	5703	2580.67	139480
d__Bacteria	k__unclassified_d__Bacteria	p__Pseudomonadota	c__Betaproteobacteria	o__Burkholderiales	f__Burkholderiaceae	g__Caballeronia	3552	2588	2916	5252	4448	5296	4594	5736	3942	4952	5128	4916	5036	3884	3130	2346	2012	2162	1600	1352	1768	1786	2062	1762	4314	4102	4210	3608	3506	4786	2674	2538	2540	2730	2452	2540	3018.67	4918.22	3095	1721.67	4087.67	2579	122220
d__Bacteria	k__unclassified_d__Bacteria	p__Cyanobacteriota	c__Cyanophyceae	o__Oscillatoriales	f__Microcoleaceae	g__Symploca	1886	1722	1658	3796	3262	4050	4174	4484	3908	3852	4294	3988	4012	3320	2818	2460	2438	2312	4338	3836	3224	7862	3852	3892	4790	4486	4596	3974	3630	5202	2530	2420	2430	2602	2602	2780	1755.33	3978.67	2893.33	4500.67	4446.33	2560.67	127480
d__Bacteria	k__unclassified_d__Bacteria	p__Thermodesulfobacteriota	c__Desulfovibrionia	o__Desulfovibrionales	f__Desulfovibrionaceae	g__Pseudodesulfovibrio	2646	2804	2602	3362	3094	4024	4300	4212	5484	4172	5152	4304	3082	2950	2512	2610	3550	2768	3972	3244	3352	2726	2718	2062	6064	5468	5458	7388	5834	9082	2546	2514	2292	2704	2594	2634	2684	4233.78	2912	3012.33	6549	2547.33	136280
d__Bacteria	k__unclassified_d__Bacteria	p__Pseudomonadota	c__Alphaproteobacteria	o__Rhodobacterales	f__Paracoccaceae	g__Antarcticimicrobium	1894	1266	1324	1198	864	1004	1060	1290	984	864	892	1050	1710	990	856	1256	1238	928	808	546	690	1166	888	868	828	778	956	576	832	930	2546	2306	2560	2710	2772	2372	1494.67	1022.89	1163	827.667	816.667	2544.33	45800
d__Bacteria	k__unclassified_d__Bacteria	p__Actinomycetota	c__Actinomycetes	o__Micrococcales	f__Beutenbergiaceae	g__Serinibacter	64	110	58	144	122	196	200	168	212	122	96	240	380	296	264	192	96	96	344	346	622	654	232	206	584	636	706	472	648	670	2746	2374	2340	2630	3000	2088	77.3333	166.667	220.667	400.667	619.333	2529.67	24354
d__Bacteria	k__unclassified_d__Bacteria	p__Actinomycetota	c__Actinomycetes	o__Propionibacteriales	f__Propionibacteriaceae	g__Cutibacterium	836	782	746	720	764	940	850	914	872	808	768	1096	1052	904	794	830	696	798	852	780	1086	1338	628	490	1106	1044	1106	1006	1284	1482	2602	2242	2358	2806	2966	2198	788	859.111	845.667	862.333	1171.33	2528.67	42544
d__Bacteria	k__unclassified_d__Bacteria	p__Pseudomonadota	c__Alphaproteobacteria	o__Hyphomicrobiales	f__Aurantimonadaceae	g__Aureimonas	1532	1342	1214	4694	3942	4384	4372	5662	3732	4258	4504	4236	3724	2898	2076	2148	1744	1978	1458	1194	1752	1588	2016	1532	2114	2010	2040	1684	2168	2464	2600	2372	2416	2728	2710	2344	1362.67	4420.44	2428	1590	2080	2528.33	95630
d__Archaea	k__unclassified_d__Archaea	p__Euryarchaeota	c__Methanomicrobia	o__Methanomicrobiales	f__Methanomicrobiaceae	g__unclassified_f__Methanomicrobiaceae	4326	2904	3602	1484	1278	1864	1746	1736	2500	1376	1876	1582	33668	31212	28660	118558	99280	78978	546	650	618	528	396	308	1098	1104	960	1340	968	1960	2370	1880	2198	2984	3038	2668	3610.67	1715.78	65059.3	507.667	1238.33	2523	442244
d__Bacteria	k__unclassified_d__Bacteria	p__Cyanobacteriota	c__Cyanophyceae	o__Gloeobacterales	f__Gloeobacteraceae	g__Gloeobacter	1658	1218	1280	2458	2244	2382	2394	2902	2242	2996	3144	2396	2706	2056	2010	1766	1392	1630	1580	1418	1744	1556	1404	1276	2132	1884	2008	2460	2518	3106	2612	2468	2456	2618	2610	2364	1385.33	2573.11	1926.67	1496.33	2351.33	2521.33	77088
d__Bacteria	k__unclassified_d__Bacteria	p__Actinomycetota	c__Actinomycetes	o__Micromonosporales	f__Micromonosporaceae	g__Rhizocola	954	810	690	1076	912	1246	1068	1160	1096	1218	1336	1194	1112	818	648	666	462	620	902	854	1272	1634	778	612	2042	1984	2072	1560	1656	2228	2706	2282	2170	2796	3118	2056	818	1145.11	721	1008.67	1923.67	2521.33	49808
d__Bacteria	k__unclassified_d__Bacteria	p__Pseudomonadota	c__Alphaproteobacteria	o__Hyphomicrobiales	f__unclassified_o__Hyphomicrobiales	g__Enhydrobacter	3244	2714	2630	6668	5894	6440	6906	7820	5692	6252	6460	5990	4134	3504	2632	2674	2024	3232	2246	1924	2590	2094	2744	2204	2412	2236	2246	1888	2380	2770	2540	2392	2398	2620	2616	2556	2862.67	6458	3033.33	2300.33	2322	2520.33	127766
d__Bacteria	k__unclassified_d__Bacteria	p__Pseudomonadota	c__Betaproteobacteria	o__Rhodocyclales	f__Azonexaceae	g__Azonexus	3456	2912	2546	1662	1554	1508	1444	1760	1310	1562	1632	1416	4214	2490	2292	2088	2346	1264	596	496	732	734	924	672	1488	1422	1438	956	1120	1332	2702	2530	2536	2764	2356	2230	2971.33	1538.67	2449	692.333	1292.67	2519.67	64484
d__Bacteria	k__unclassified_d__Bacteria	p__Actinomycetota	c__Actinomycetes	o__Micrococcales	f__Microbacteriaceae	g__Aurantimicrobium	128	164	108	204	220	212	226	244	266	308	242	322	346	224	150	126	138	108	422	334	616	820	322	324	786	806	816	488	682	832	2660	2276	2548	2810	2778	2034	133.333	249.333	182	473	735	2517.67	26090
d__Bacteria	k__unclassified_d__Bacteria	p__Bacteroidota	c__Sphingobacteriia	o__Sphingobacteriales	f__Sphingobacteriaceae	g__Pedobacter	4188	3138	3344	3426	2960	3594	3212	3920	3274	3242	3488	3488	5496	3712	3322	5690	11018	3542	1726	1778	1986	2436	2140	1706	5400	4656	4740	9644	7190	9512	2614	2590	2532	2390	2484	2476	3556.67	3400.44	5463.33	1962	6857	2514.33	142054
d__Bacteria	k__unclassified_d__Bacteria	p__Cyanobacteriota	c__Cyanophyceae	o__Leptolyngbyales	f__Trichocoleusaceae	g__Trichocoleus	1420	1288	1250	3106	2862	3726	3548	3758	3618	3510	3832	3654	3546	2852	2224	2088	1798	2200	2646	2344	2416	3274	2684	2286	3446	3420	3274	2964	2530	3772	2346	2522	2420	2636	2508	2612	1319.33	3512.67	2451.33	2608.33	3234.33	2507.33	100380
d__Bacteria	k__unclassified_d__Bacteria	p__Pseudomonadota	c__Gammaproteobacteria	o__Cellvibrionales	f__Spongiibacteraceae	g__unclassified_f__Spongiibacteraceae	1656	1202	1344	1068	1242	1398	1390	2154	952	984	1014	1070	1098	898	856	842	920	650	1886	1536	1956	1804	1920	2194	2886	3084	3210	1886	2846	2404	2914	2750	2668	1998	1892	2804	1400.67	1252.44	877.333	1882.67	2719.33	2504.33	63376
d__Bacteria	k__unclassified_d__Bacteria	p__Actinomycetota	c__Actinomycetes	o__Mycobacteriales	f__Nocardiaceae	g__Aldersonia	1762	1140	1208	3722	3052	3306	3646	4190	2594	4144	4002	3688	2264	2046	1380	1280	552	1394	970	1024	1392	1320	1168	850	1774	1794	1948	1226	1736	1924	2510	2414	2258	2640	2966	2232	1370	3593.78	1486	1120.67	1733.67	2503.33	77516
d__Bacteria	k__unclassified_d__Bacteria	p__Pseudomonadota	c__Gammaproteobacteria	o__Cellvibrionales	f__Halieaceae	g__Congregibacter	3396	2756	2386	1474	1428	1714	1976	2176	1874	1596	1694	1526	2562	1826	1502	1992	2210	1228	4932	3650	4446	7734	5174	5550	5598	5832	6090	4596	7020	6032	2910	2624	2698	2132	2178	2466	2846	1717.56	1886.67	5247.67	5861.33	2501.33	116978
d__Bacteria	k__unclassified_d__Bacteria	p__Candidatus_Saccharibacteria	c__Candidatus_Saccharimonadia	o__Candidatus_Saccharimonadales	f__Candidatus_Saccharimonadaceae	g__Candidatus_Saccharimonas	2562	3182	2074	6564	4990	5722	5706	7744	4216	5494	5888	5160	6594	4746	3404	3270	2636	2692	1614	1494	2290	1788	4640	3426	1900	1586	1726	1890	2204	2876	2424	2258	2554	2620	2486	2622	2606	5720.44	3890.33	2542	2030.33	2494	125042
d__Bacteria	k__unclassified_d__Bacteria	p__Ignavibacteriota	c__Ignavibacteria	o__Ignavibacteriales	f__Melioribacteraceae	g__Melioribacter	11120	5270	11676	2688	3230	3090	3384	3220	3532	3982	4236	3010	3662	3276	2694	5030	10348	3482	2320	2518	2048	3452	2500	2060	21434	10336	11482	82018	23116	77832	2672	2614	2554	2244	2302	2548	9355.33	3374.67	4748.67	2483	37703	2489	342980
d__Bacteria	k__unclassified_d__Bacteria	p__Myxococcota	c__Myxococcia	o__Myxococcales	f__Archangiaceae	g__Stigmatella	2328	2112	1796	4136	3460	3948	4138	6630	3662	5766	5442	5172	3130	4276	5210	3216	2710	4810	1494	1430	1734	2052	2202	2450	3970	3188	2986	7472	4300	6570	2598	2524	2404	2472	2664	2268	2078.67	4706	3892	1893.67	4747.67	2488.33	126720
d__Bacteria	k__unclassified_d__Bacteria	p__Pseudomonadota	c__Betaproteobacteria	o__Nitrosomonadales	f__Sterolibacteriaceae	g__Denitratisoma	3868	2306	2548	1882	1732	1922	2024	2020	1652	1914	2082	1772	2796	1936	1618	1422	1536	1196	860	742	1028	858	940	760	734	736	710	600	718	820	2692	2638	2514	2488	2256	2328	2907.33	1888.89	1750.67	864.667	719.667	2486	60648
d__Bacteria	k__unclassified_d__Bacteria	p__Cyanobacteriota	c__Cyanophyceae	o__Nostocales	f__Scytonemataceae	g__Scytonema	1726	1524	1636	3662	3496	4282	4198	4510	4760	4098	4622	3938	3922	3514	2792	2770	2464	2664	2424	2406	2404	4792	2142	1872	3500	3254	3216	3330	2780	4124	2390	2402	2312	2504	2716	2564	1628.67	4174	3021	2673.33	3367.33	2481.33	111710
d__Bacteria	k__unclassified_d__Bacteria	p__Actinomycetota	c__Actinomycetes	o__Micrococcales	f__Micrococcaceae	g__Nesterenkonia	826	514	620	786	596	668	814	754	756	792	820	692	1004	952	718	614	440	624	742	724	1082	1520	574	530	1152	1028	1244	872	1234	1418	2574	2148	2212	2842	2930	2172	653.333	742	725.333	862	1158	2479.67	39988
d__Bacteria	k__unclassified_d__Bacteria	p__Pseudomonadota	c__Alphaproteobacteria	o__Rhodobacterales	f__Paracoccaceae	g__Marinibacterium	2448	1792	1892	2414	2226	2746	2638	3482	2452	2332	2596	2988	2830	1618	3024	1464	1426	1324	2148	1642	1874	3044	2352	2370	2146	2214	2398	1394	2328	2336	2664	2180	2496	2474	2612	2444	2044	2652.67	1947.67	2238.33	2136	2478.33	82808
d__Bacteria	k__unclassified_d__Bacteria	p__Myxococcota	c__unclassified_p__Myxococcota	o__Nannocystales	f__Nannocystaceae	g__Plesiocystis	1682	1266	1370	3602	3388	3180	2844	3190	2742	3616	3148	2942	3954	14650	10598	7064	3240	11876	1598	1450	1996	2476	2570	2162	2386	2040	1820	5880	4010	5678	2710	2364	2316	2500	2604	2372	1439.33	3183.56	8563.67	2042	3635.67	2477.67	133284
d__Bacteria	k__unclassified_d__Bacteria	p__Pseudomonadota	c__Alphaproteobacteria	o__Rhodospirillales	f__Azospirillaceae	g__Indioceanicola	1558	1180	1226	2830	2384	2394	2238	2742	1794	1838	1952	1758	3016	2384	1876	2004	1756	1364	1420	1158	1666	1614	1918	1506	1920	1710	1834	1754	2184	2548	2624	2510	2454	2582	2382	2272	1321.33	2214.44	2066.67	1547	1991.67	2470.67	72350
d__Bacteria	k__unclassified_d__Bacteria	p__Pseudomonadota	c__Alphaproteobacteria	o__Hyphomicrobiales	f__Phyllobacteriaceae	g__Aquamicrobium	3074	1716	2204	4614	3776	4066	4272	5658	3302	4244	4462	4372	3930	2582	2240	2620	2342	2306	1550	1102	1416	1570	3760	1628	2058	1958	2228	1458	1938	2086	2516	2132	2206	2738	2904	2312	2331.33	4307.33	2670	1837.67	1954.33	2468	99340
d__Bacteria	k__unclassified_d__Bacteria	p__Pseudomonadota	c__Hydrogenophilia	o__unclassified_c__Hydrogenophilia	f__unclassified_c__Hydrogenophilia	g__Pelomicrobium	6024	3914	4656	10352	9160	7496	7638	7440	5054	8916	9308	6306	8130	5614	4426	2792	2150	2562	1290	988	1258	1346	2548	2278	2130	2044	2054	1518	1694	1996	2508	2396	2422	2654	2418	2334	4864.67	7963.33	4279	1618	1906	2455.33	147814
d__Bacteria	k__unclassified_d__Bacteria	p__Pseudomonadota	c__Gammaproteobacteria	o__Chromatiales	f__Chromatiaceae	g__Thermochromatium	736	616	588	324	210	248	274	300	274	276	270	264	788	694	532	650	718	334	556	392	528	584	528	520	1358	1342	1408	862	812	892	2496	2322	2308	2878	2490	2228	646.667	271.111	619.333	518	1112.33	2453.67	32600
d__Bacteria	k__unclassified_d__Bacteria	p__Actinomycetota	c__Actinomycetes	o__Micrococcales	f__unclassified_o__Micrococcales	g__Luteimicrobium	330	556	280	404	374	520	480	380	516	482	516	468	540	424	392	344	218	336	642	658	1154	1378	418	254	1108	1158	1114	806	1010	1316	2466	2244	2220	2666	3020	2100	388.667	460	375.667	750.667	1085.33	2452.67	33292
d__Bacteria	k__unclassified_d__Bacteria	p__Cyanobacteriota	c__Cyanophyceae	o__Oscillatoriales	f__Microcoleaceae	g__Planktothrix	2148	1810	1616	3716	3142	3792	3968	4294	3980	3920	4286	3712	3798	3264	2706	2468	2206	2548	7210	6434	3124	5104	3174	2628	2968	2592	2730	2656	2846	3682	2386	2288	2362	2524	2484	2660	1858	3867.78	2831.67	4612.33	2912.33	2450.67	117226
d__Bacteria	k__unclassified_d__Bacteria	p__Pseudomonadota	c__Alphaproteobacteria	o__Hyphomicrobiales	f__Stappiaceae	g__Hongsoonwoonella	1810	1208	1448	6642	5514	5834	6128	7544	4918	5486	5612	5576	3554	2380	1898	1608	1098	1984	2002	1488	1974	1980	3484	2254	2598	2220	2380	1728	2530	2580	2336	2050	2316	2608	3008	2284	1488.67	5917.11	2087	2197	2339.33	2433.67	112062
d__Bacteria	k__unclassified_d__Bacteria	p__Actinomycetota	c__Actinomycetes	o__Propionibacteriales	f__Propionibacteriaceae	g__Enemella	626	426	436	440	344	502	502	512	518	512	556	590	900	632	446	488	420	412	422	394	630	814	448	376	672	736	774	506	776	778	2518	2232	2216	2778	2792	2064	496	497.333	549.667	514	707	2433.33	31188
d__Bacteria	k__unclassified_d__Bacteria	p__Actinomycetota	c__Candidatus_Aquicultoria	o__Candidatus_Aquicultorales	f__Candidatus_Aquicultoraceae	g__Candidatus_Aquicultor	5256	4058	4076	2552	2436	3142	3562	3116	4066	3810	4740	3682	2744	2512	1810	2508	1596	2680	1764	1454	1616	1924	1382	1220	2580	2524	2660	2732	2064	3444	2562	2384	2382	2426	2426	2418	4463.33	3456.22	2308.33	1560	2667.33	2433	98308
d__Archaea	k__unclassified_d__Archaea	p__Euryarchaeota	c__Methanomicrobia	o__Methanomicrobiales	f__Methanoregulaceae	g__Methanoregula	3418	2530	2814	2272	2116	2636	3166	3238	3536	3028	3558	3012	3336	2956	2318	3076	3298	2714	2364	2098	2302	1058	1276	832	3380	2966	2812	4278	2906	4762	2374	2316	2292	2556	2512	2512	2920.67	2951.33	2949.67	1655	3517.33	2427	98618
d__Bacteria	k__unclassified_d__Bacteria	p__Pseudomonadota	c__Alphaproteobacteria	o__Rhodospirillales	f__Rhodospirillaceae	g__Hwanghaeella	1534	1356	1142	8706	7782	7502	7008	8092	5784	5510	5950	5306	4064	3454	2392	2296	1412	2664	2800	2234	2680	2980	5290	4656	2654	2398	2682	1880	2772	2830	2518	2230	2302	2380	2692	2422	1344	6848.89	2713.67	3440	2536	2424	132354
d__Bacteria	k__unclassified_d__Bacteria	p__Pseudomonadota	c__Alphaproteobacteria	o__Rhodobacterales	f__Roseobacteraceae	g__Thetidibacter	2152	1392	1470	808	618	822	816	1002	684	820	774	748	2814	1582	1578	1922	1636	1278	1508	1110	982	3322	1262	1156	974	922	1044	712	1238	1136	2564	2178	2086	2652	2810	2236	1671.33	788	1801.67	1556.67	1004.33	2421	52808
d__Bacteria	k__unclassified_d__Bacteria	p__Pseudomonadota	c__Betaproteobacteria	o__Nitrosomonadales	f__Sterolibacteriaceae	g__Sterolibacterium	5766	3414	4100	2732	2620	2628	2658	2726	2148	2804	2972	2488	3962	2758	2196	2134	2252	1854	904	698	1090	774	1104	988	1316	1208	1290	1122	1276	1348	2618	2410	2316	2664	2240	2242	4426.67	2641.78	2526	926.333	1260	2415	79820
d__Bacteria	k__unclassified_d__Bacteria	p__Pseudomonadota	c__Betaproteobacteria	o__Burkholderiales	f__Comamonadaceae	g__Comamonas	4206	2636	3026	2242	1972	2134	2126	2658	1864	2484	2416	2204	3948	2732	2520	2260	2120	1728	918	764	1092	1298	1256	1152	1716	1424	1448	2138	1758	2108	2458	2436	2330	2504	2406	2346	3289.33	2233.33	2551.33	1080	1765.33	2413.33	76828
d__Bacteria	k__unclassified_d__Bacteria	p__Pseudomonadota	c__Gammaproteobacteria	o__Kangiellales	f__Kangiellaceae	g__Kangiella	3286	2482	2496	2312	1980	2204	2434	2670	2078	2300	2552	2102	2368	2144	2148	2444	2654	3434	3060	2248	3288	5192	3904	3942	4604	4604	4704	3808	4916	4952	2554	2664	2608	2254	2016	2352	2754.67	2292.44	2532	3605.67	4598	2408	107758
d__Bacteria	k__unclassified_d__Bacteria	p__Pseudomonadota	c__Alphaproteobacteria	o__Hyphomicrobiales	f__Xanthobacteraceae	g__Xanthobacter	1404	1228	1142	5112	4230	4466	4926	5926	3798	5012	4794	4698	3892	2548	2154	1894	1484	1960	1350	1136	1654	1714	1882	1472	1792	1606	1504	1324	1846	2052	2412	2184	2100	2666	2798	2272	1258	4773.56	2322	1534.67	1687.33	2405.33	94432
d__Bacteria	k__unclassified_d__Bacteria	p__Pseudomonadota	c__Alphaproteobacteria	o__Parvularculales	f__Parvularculaceae	g__Marinicaulis	10710	6862	5886	5032	4400	4666	4922	5730	3870	4042	4220	3574	4522	3774	2870	7132	10800	4018	4878	3504	5016	8404	13172	7034	4696	4922	4662	3674	5512	5708	2816	2408	2562	2158	2102	2370	7819.33	4495.11	5519.33	7001.33	4862.33	2402.67	182628
d__Bacteria	k__unclassified_d__Bacteria	p__Pseudomonadota	c__Gammaproteobacteria	o__Chromatiales	f__Ectothiorhodospiraceae	g__Natronospira	1710	1338	1322	1272	1248	1200	1254	1606	1016	1266	1368	924	2138	1668	1554	1922	1782	1244	2992	2456	2890	3194	3294	2774	2172	1722	1798	2166	3078	2800	2628	2446	2638	2122	1946	2604	1456.67	1239.33	1718	2933.33	2289.33	2397.33	71552
d__Bacteria	k__unclassified_d__Bacteria	p__Actinomycetota	c__Actinomycetes	o__Pseudonocardiales	f__Pseudonocardiaceae	g__Actinoalloteichus	608	526	608	638	512	668	742	750	652	704	666	682	718	602	534	380	218	394	660	580	948	1256	628	492	898	972	1002	762	1086	1210	2536	2176	2132	2534	2876	2082	580.667	668.222	474.333	760.667	988.333	2389.33	35432
d__Bacteria	k__unclassified_d__Bacteria	p__Actinomycetota	c__Actinomycetes	o__Micrococcales	f__Microbacteriaceae	g__Aquiluna	400	372	314	368	362	456	368	326	456	330	320	346	628	428	436	230	232	174	436	422	640	836	436	392	698	788	892	590	782	838	2542	2130	2254	2556	2798	2036	362	370.222	354.667	527	764.667	2386	28612
d__Bacteria	k__unclassified_d__Bacteria	p__Pseudomonadota	c__Gammaproteobacteria	o__Pseudomonadales	f__Pseudomonadaceae	g__Azotobacter	2012	1446	1452	1564	1258	1600	1554	1792	1396	1456	1450	1542	2948	1982	1752	1698	1592	1278	1128	868	1170	948	914	880	1944	1726	1864	1620	2006	2184	2564	2522	2276	2362	2062	2518	1636.67	1512.44	1875	984.667	1890.67	2384	61328
d__Bacteria	k__unclassified_d__Bacteria	p__Pseudomonadota	c__Alphaproteobacteria	o__Rhodobacterales	f__Paracoccaceae	g__Marivivens	7072	4536	4448	3514	3886	5978	5104	4870	22912	9416	7306	17074	5348	3432	3158	3416	4162	2690	2068	1296	1134	3254	2244	2086	1680	1862	2400	1022	1814	1716	2542	2328	2348	2224	2516	2338	5352	8895.56	3701	2013.67	1749	2382.67	155194
d__Bacteria	k__unclassified_d__Bacteria	p__Candidatus_Peregrinibacteria	c__unclassified_p__Candidatus_Peregrinibacteria	o__unclassified_p__Candidatus_Peregrinibacteria	f__unclassified_p__Candidatus_Peregrinibacteria	g__unclassified_p__Candidatus_Peregrinibacteria	2714	2288	2474	3036	2950	3470	3424	3552	4130	3326	3852	3450	3500	2964	2426	3200	3998	2692	2036	1672	2180	1426	1676	1656	4760	2926	3056	16542	8674	34640	2408	2318	2260	2408	2458	2432	2492	3465.56	3130	1774.33	11766.3	2380.67	152974
d__Bacteria	k__unclassified_d__Bacteria	p__Acidobacteriota	c__Terriglobia	o__unclassified_c__Terriglobia	f__unclassified_c__Terriglobia	g__Candidatus_Angelobacter	6428	4338	5322	9486	8092	8744	10562	12214	8486	14258	14356	11252	6114	5146	4006	3950	3200	5152	2248	1960	2542	1778	3806	3756	4176	3498	3400	4834	3766	6172	2384	2354	2432	2360	2424	2320	5362.67	10827.8	4594.67	2681.67	4307.67	2379	197316
d__Bacteria	k__unclassified_d__Bacteria	p__Pseudomonadota	c__Alphaproteobacteria	o__Rhodobacterales	f__Paracoccaceae	g__Cognatishimia	2748	1736	2142	1266	1102	1468	1182	1902	1432	1240	1412	1610	2966	1614	1494	1544	1598	1030	2524	1890	1750	4938	2472	2652	1410	1380	1708	1044	1982	1786	2514	2030	2316	2254	2668	2398	2208.67	1401.56	1707.67	2704.33	1551.67	2363.33	69202
d__Bacteria	k__unclassified_d__Bacteria	p__Pseudomonadota	c__Alphaproteobacteria	o__Parvularculales	f__Parvularculaceae	g__Parvularcula	23918	13514	10988	4402	4228	4014	4276	4732	3494	3666	4004	3414	4856	3594	2788	7898	7758	4862	3238	2352	3140	6086	5788	4864	3022	2972	3170	2738	3904	3912	2538	2384	2346	2278	2286	2286	16140	4025.56	5292.67	4244.67	3286.33	2353	175710
d__Bacteria	k__unclassified_d__Bacteria	p__Pseudomonadota	c__Alphaproteobacteria	o__Maricaulales	f__Maricaulaceae	g__Oceanicaulis	2248	1734	1734	1736	1540	1772	1630	1774	1608	1536	1910	1506	4076	3708	3192	3778	4612	2894	1854	1546	1492	1760	2172	1904	4762	3502	3526	8122	4972	7812	2394	2122	2308	2384	2500	2394	1905.33	1668	3710	1788	5449.33	2350.33	100514
d__Archaea	k__unclassified_d__Archaea	p__Candidatus_Hadarchaeota	c__Candidatus_Hadarchaeia	o__unclassified_c__Candidatus_Hadarchaeia	f__unclassified_c__Candidatus_Hadarchaeia	g__unclassified_c__Candidatus_Hadarchaeia	2674	2344	2350	2162	2036	2684	2880	2876	3384	2724	3212	2578	2508	2648	1804	1534	1064	1920	2672	2404	2894	1616	1462	920	3084	2680	2876	2942	2250	3838	2276	2252	2240	2278	2622	2426	2456	2726.22	1913	1994.67	2945	2349	87114
d__Bacteria	k__unclassified_d__Bacteria	p__Actinomycetota	c__Actinomycetes	o__Glycomycetales	f__Glycomycetaceae	g__Stackebrandtia	774	706	626	854	712	884	836	850	726	824	894	738	1024	904	676	440	292	466	716	698	1058	1526	698	682	1190	1016	1144	938	1238	1546	2422	2222	2200	2516	2666	2066	702	813.111	633.667	896.333	1178.67	2348.67	39768
d__Bacteria	k__unclassified_d__Bacteria	p__Pseudomonadota	c__Gammaproteobacteria	o__Thiotrichales	f__Piscirickettsiaceae	g__Cycloclasticus	2638	1922	2032	2368	2164	2726	2534	2870	2520	2382	2678	2600	2422	1988	1934	1850	2260	1706	2326	2148	2484	2712	3756	3532	4896	5020	5274	3208	3906	4180	2466	2600	2486	2140	1876	2502	2197.33	2538	2026.67	2826.33	4414	2345	99106
d__Bacteria	k__unclassified_d__Bacteria	p__Chloroflexota	c__unclassified_p__Chloroflexota	o__unclassified_p__Chloroflexota	f__unclassified_p__Chloroflexota	g__Thermobaculum	3926	2426	2944	3822	3210	3832	3808	3984	3650	4682	5176	4064	4308	3654	2600	2840	1790	2874	1374	1296	1532	1654	1196	1116	2998	2740	2640	2834	2142	3450	2406	2334	2316	2320	2540	2132	3098.67	4025.33	3011	1361.33	2800.67	2341.33	102610
d__Bacteria	k__unclassified_d__Bacteria	p__Pseudomonadota	c__Alphaproteobacteria	o__Rhodobacterales	f__Roseobacteraceae	g__Lutimaribacter	2522	1414	1922	936	868	1104	1034	1260	1012	906	926	1140	2680	1488	1282	1976	1944	1296	2428	1646	1488	5426	2058	2078	2118	1662	1934	1358	3790	2498	2518	2042	2190	2462	2580	2244	1952.67	1020.67	1777.67	2520.67	2226.67	2339.33	68230
d__Bacteria	k__unclassified_d__Bacteria	p__Actinomycetota	c__Actinomycetes	o__Candidatus_Nanopelagicales	f__Candidatus_Nanopelagicaceae	g__Candidatus_Nanopelagicus	96	186	94	102	100	98	160	108	122	170	148	134	308	224	172	114	172	82	202	134	392	388	126	110	402	454	438	324	356	492	2526	2106	2084	2612	2668	2004	125.333	126.889	178.667	225.333	411	2333.33	20408
d__Bacteria	k__unclassified_d__Bacteria	p__Bacteroidota	c__unclassified_p__Bacteroidota	o__Candidatus_Sulfidibacteriales	f__unclassified_o__Candidatus_Sulfidibacteriales	g__Candidatus_Sulfidibacterium	684	1294	686	350	278	460	522	418	680	386	498	418	1378	1084	844	15154	111096	1456	1546	1708	1388	2630	1016	554	11340	9704	9232	23282	31848	19124	2656	2678	2486	2340	1828	2002	888	445.556	21835.3	1473.67	17421.7	2331.67	265048
d__Bacteria	k__unclassified_d__Bacteria	p__Bacteroidota	c__Bacteroidia	o__Bacteroidales	f__Rikenellaceae	g__Alistipes	1804	1948	1560	1262	1142	1422	1476	1728	1556	1672	1734	1636	2526	2036	1946	4152	8546	2458	1074	1006	1264	964	904	980	4424	3656	3514	10648	6370	9150	2550	2176	2256	2368	2422	2182	1770.67	1514.22	3610.67	1032	6293.67	2325.67	98512
d__Bacteria	k__unclassified_d__Bacteria	p__Actinomycetota	c__Actinomycetes	o__Micrococcales	f__Kytococcaceae	g__Kytococcus	314	252	306	240	228	244	280	266	248	276	324	252	356	318	286	186	110	174	384	304	736	678	180	130	452	428	472	426	654	654	2424	2158	2104	2514	2678	2056	290.667	262	238.333	402	514.333	2322.33	24092
d__Bacteria	k__unclassified_d__Bacteria	p__Actinomycetota	c__Actinomycetes	o__Propionibacteriales	f__Propionibacteriaceae	g__Aestuariimicrobium	190	168	138	216	184	140	180	216	146	182	174	164	262	236	230	128	82	150	228	274	352	492	224	154	270	350	300	240	366	450	2266	2000	2078	2728	2726	2124	165.333	178	181.333	287.333	329.333	2320.33	20808
d__Bacteria	k__unclassified_d__Bacteria	p__Pseudomonadota	c__Gammaproteobacteria	o__Chromatiales	f__Ectothiorhodospiraceae	g__Oceanococcus	1314	1148	972	1452	1230	1402	1634	1630	1324	1216	1368	1340	1672	1388	1156	1322	1440	940	1844	1454	1806	3180	1888	1860	2052	1876	2082	1958	2528	2296	2574	2318	2270	2414	2164	2146	1144.67	1399.56	1319.67	2005.33	2132	2314.33	62658
d__Bacteria	k__unclassified_d__Bacteria	p__Actinomycetota	c__Actinomycetes	o__Micromonosporales	f__Micromonosporaceae	g__Pseudosporangium	328	468	238	650	426	492	480	486	430	420	436	470	456	398	412	272	146	262	502	438	710	702	284	220	590	614	700	546	710	730	2382	2130	2054	2514	2782	2022	344.667	476.667	324.333	476	648.333	2314	27900
d__Bacteria	k__unclassified_d__Bacteria	p__Actinomycetota	c__Actinomycetes	o__Mycobacteriales	f__Tsukamurellaceae	g__Tsukamurella	222	300	176	530	536	504	486	500	486	502	490	524	612	500	424	408	254	282	414	402	728	778	410	282	666	640	764	598	770	954	2372	2150	2212	2470	2738	1896	232.667	506.444	413.333	502.333	732	2306.33	28980
d__Bacteria	k__unclassified_d__Bacteria	p__Verrucomicrobiota	c__Verrucomicrobiae	o__Verrucomicrobiales	f__Verrucomicrobiaceae	g__Verrucomicrobium	2702	3092	2194	6694	5154	7772	7934	11270	7868	8118	8722	10134	11704	7666	6616	3884	3960	3318	1016	1090	1326	1542	1478	1084	2130	2044	1958	2246	2558	2856	2264	2108	2148	2322	2558	2422	2662.67	8185.11	6191.33	1256	2298.67	2303.67	153952
d__Bacteria	k__unclassified_d__Bacteria	p__Spirochaetota	c__Spirochaetia	o__Leptospirales	f__Leptospiraceae	g__Leptospira	2854	2180	2268	3482	3168	3772	3994	4152	3844	3936	4296	3390	3502	3228	2762	2978	3724	2944	2326	1830	2608	2334	2508	2136	3908	3584	3624	6808	4120	6750	2290	2188	2284	2378	2324	2308	2434	3781.56	3189.67	2290.33	4799	2295.33	116782
d__Bacteria	k__unclassified_d__Bacteria	p__Myxococcota	c__Myxococcia	o__Myxococcales	f__Archangiaceae	g__Hyalangium	2954	2538	2210	5016	3900	4184	4680	8230	3312	8134	7412	6884	3932	4542	5538	2748	2150	6278	1704	1508	2054	1860	2616	2294	3508	3028	2968	7544	4234	6980	2382	2266	2198	2360	2350	2206	2567.33	5750.22	4198	2006	4710.33	2293.67	138702
d__Bacteria	k__unclassified_d__Bacteria	p__Pseudomonadota	c__Zetaproteobacteria	o__Mariprofundales	f__Mariprofundaceae	g__Mariprofundus	1648	1490	1482	2206	1954	2536	2408	2714	2464	2388	2620	2512	1864	1766	1890	2232	2404	2128	2254	1946	2454	2952	2544	2158	5704	5444	6034	5018	4648	5388	2400	2396	2466	2136	2040	2310	1540	2422.44	2047.33	2384.67	5372.67	2291.33	98998
d__Bacteria	k__unclassified_d__Bacteria	p__Pseudomonadota	c__Alphaproteobacteria	o__Hyphomicrobiales	f__Rhodovibrionaceae	g__Fodinicurvata	1584	1226	1280	11062	9276	8576	7964	9208	6050	6452	6388	5862	4264	3800	2654	1832	1008	2318	4928	3272	4934	2620	13162	9328	1962	1764	1934	1900	2366	2404	2472	2242	2262	2108	2216	2440	1363.33	7870.89	2646	6374	2055	2290	155118
d__Bacteria	k__unclassified_d__Bacteria	p__Pseudomonadota	c__Gammaproteobacteria	o__unclassified_c__Gammaproteobacteria	f__unclassified_c__Gammaproteobacteria	g__Candidatus_Vondammii	1078	882	834	408	384	442	408	460	576	438	508	464	740	766	756	522	922	334	1190	1048	1112	1816	936	790	5676	5746	6538	2474	2662	2858	2292	2432	2288	2488	2082	2106	931.333	454.222	673.333	1148.67	4325.67	2281.33	57456
d__Bacteria	k__unclassified_d__Bacteria	p__Actinomycetota	c__Actinomycetes	o__Micrococcales	f__Microbacteriaceae	g__Pseudoclavibacter	608	504	510	820	794	1002	958	916	1024	980	920	1044	1068	914	642	566	456	570	832	810	1070	1352	654	494	1376	1350	1402	970	1276	1516	2310	2020	2078	2384	2734	2122	540.667	939.778	702.667	868.667	1315	2274.67	41046
d__Bacteria	k__unclassified_d__Bacteria	p__Pseudomonadota	c__Alphaproteobacteria	o__Rhodobacterales	f__Paracoccaceae	g__Pseudohalocynthiibacter	3596	1990	2948	2118	1598	1930	1870	2342	1662	1918	1912	2116	2244	1132	1056	896	816	858	1704	1518	1572	2468	2554	1932	2024	1880	2052	1230	2346	2250	2532	1948	2068	2250	2646	2182	2844.67	1940.67	1167	1958	1963.67	2271	70158
d__Bacteria	k__unclassified_d__Bacteria	p__Candidatus_Falkowbacteria	c__unclassified_p__Candidatus_Falkowbacteria	o__unclassified_p__Candidatus_Falkowbacteria	f__unclassified_p__Candidatus_Falkowbacteria	g__unclassified_p__Candidatus_Falkowbacteria	2236	1730	1618	1334	1214	1748	1770	1926	1932	1620	1960	1856	2394	1730	1784	3746	8304	2258	1678	1294	1300	1112	1336	1046	4640	4364	4402	9196	7914	8612	2238	2198	2110	2590	2296	2186	1861.33	1706.67	3369.33	1294.33	6521.33	2269.67	101672
d__Bacteria	k__unclassified_d__Bacteria	p__Actinomycetota	c__Actinomycetes	o__Micrococcales	f__Promicromonosporaceae	g__Xylanimonas	436	328	360	630	530	652	540	674	590	658	612	640	638	564	488	454	272	402	410	396	584	772	312	326	730	726	946	606	866	1048	2416	2062	2020	2510	2684	1856	374.667	614	469.667	466.667	820.333	2258	30738
d__Bacteria	k__unclassified_d__Bacteria	p__Pseudomonadota	c__Betaproteobacteria	o__Burkholderiales	f__Sphaerotilaceae	g__Leptothrix	10282	5894	6910	1404	1246	1474	1708	2170	1472	1964	2126	2166	6760	3666	3342	3050	2982	1580	498	478	602	620	610	506	1070	1140	1040	888	1040	1268	2280	2252	2184	2556	2230	2030	7695.33	1747.78	3563.33	552.333	1074.33	2255.33	83488
d__Bacteria	k__unclassified_d__Bacteria	p__Acidobacteriota	c__Terriglobia	o__Bryobacterales	f__Bryobacteraceae	g__Bryobacter	6114	4020	4616	5418	4662	5486	6356	6814	5116	7936	8216	6588	6836	5712	4796	7414	7262	6102	1566	1428	1920	1240	2220	1852	2990	2550	2830	3896	3136	4748	2098	2124	2192	2336	2500	2242	4916.67	6288	6353.67	1704.33	3358.33	2248.67	153332
d__Bacteria	k__unclassified_d__Bacteria	p__Pseudomonadota	c__Alphaproteobacteria	o__Hyphomicrobiales	f__Propylenellaceae	g__Propylenella	3032	2368	2240	25982	21164	21862	23808	27182	18266	19150	22160	18630	9500	6752	4548	2580	962	7906	2506	1470	2414	1830	5640	3560	1470	1480	1616	1294	2034	2062	2082	1932	2078	2506	2634	2234	2546.67	22022.7	5374.67	2903.33	1659.33	2244.33	278934
d__Bacteria	k__unclassified_d__Bacteria	p__Planctomycetota	c__Phycisphaerae	o__Sedimentisphaerales	f__Anaerohalosphaeraceae	g__Anaerohalosphaera	1612	1986	1534	2072	1652	2366	2600	2602	2920	2654	3030	2460	3514	3212	2650	3538	5646	2720	3602	3576	10422	1462	2540	1178	4384	3570	3516	14402	10314	11006	2314	2088	2106	2222	2280	2450	1710.67	2484	3546.67	3796.67	7865.33	2243.33	132200
d__Bacteria	k__unclassified_d__Bacteria	p__Pseudomonadota	c__Alphaproteobacteria	o__Rhodobacterales	f__Roseobacteraceae	g__Palleronia	2330	1512	1746	1448	1304	1546	1392	2156	1444	1596	1464	1680	3392	2090	1842	1838	1802	1222	12414	2998	1604	13848	4122	8142	1344	1360	1428	994	1810	1666	2234	1950	2186	2396	2610	2080	1862.67	1558.89	2031	7188	1433.67	2242.67	96990
d__Bacteria	k__unclassified_d__Bacteria	p__Chloroflexota	c__Ktedonobacteria	o__Ktedonobacterales	f__Ktedonosporobacteraceae	g__Ktedonosporobacter	2486	1924	1914	3918	3736	4688	4448	4402	4866	4480	4750	4192	3882	3518	2344	2672	1910	2792	1768	1742	2354	1566	930	860	2834	2596	2746	2248	1970	3110	2288	2086	2072	2282	2312	2348	2108	4386.67	2853	1536.67	2584	2231.33	101034
d__Bacteria	k__unclassified_d__Bacteria	p__Actinomycetota	c__Actinomycetes	o__Micrococcales	f__Microbacteriaceae	g__Glaciihabitans	410	444	320	582	614	816	780	618	840	684	766	874	1024	824	690	510	372	596	724	666	976	1010	500	352	1260	1132	1242	968	1094	1476	2290	1928	1998	2504	2656	1994	391.333	730.444	669.333	704.667	1195.33	2228.33	36534
d__Bacteria	k__unclassified_d__Bacteria	p__Pseudomonadota	c__Gammaproteobacteria	o__Oceanospirillales	f__Oceanospirillaceae	g__Amphritea	2614	2010	1926	3002	3098	3890	3616	4284	3190	3236	3458	3322	2888	2438	2156	2010	2318	2304	2020	1632	2332	2622	3032	3270	4380	4324	4490	3182	3434	4412	2388	2274	2202	2078	2198	2226	2183.33	3455.11	2352.33	2484.67	4037	2227.67	104256
d__Bacteria	k__unclassified_d__Bacteria	p__Bacteroidota	c__Cytophagia	o__Cytophagales	f__Catalimonadaceae	g__Tunicatimonas	3678	1892	3416	2172	1732	2224	2320	2790	2652	1826	2156	1964	3482	2362	2354	2582	3766	2178	4100	1984	2150	2858	2184	3072	5084	4710	4554	6152	5576	7090	2416	2338	2342	2098	2022	2142	2995.33	2204	2787.33	2724.67	5527.67	2226.33	108418
d__Bacteria	k__unclassified_d__Bacteria	p__Actinomycetota	c__Actinomycetes	o__Pseudonocardiales	f__Pseudonocardiaceae	g__Haloechinothrix	828	604	666	1348	1248	1598	1536	1508	1498	1534	1590	1454	1292	1138	904	834	340	1010	1010	892	1290	1832	1038	816	1352	1464	1758	1242	1632	1848	2244	1966	1934	2494	2782	1918	699.333	1479.33	919.667	1146.33	1549.33	2223	50442
d__Bacteria	k__unclassified_d__Bacteria	p__Bacteroidota	c__Bacteroidia	o__Marinilabiliales	f__Prolixibacteraceae	g__Mangrovibacterium	3082	3390	2706	4280	2842	5120	5786	3298	18460	7100	7466	11578	4858	2962	4614	7318	12066	3792	1300	1336	1516	1856	1130	726	9102	9326	8444	16264	11612	14962	2362	2352	2406	1988	2084	2140	3059.33	7325.56	5935	1310.67	11618.3	2222	201624
d__Bacteria	k__unclassified_d__Bacteria	p__Pseudomonadota	c__Gammaproteobacteria	o__unclassified_c__Gammaproteobacteria	f__unclassified_c__Gammaproteobacteria	g__Candidatus_Reidiella	2336	2010	2002	1870	1816	1824	2026	1802	2124	1902	2222	2000	2528	3066	4562	3230	5530	6728	2446	1968	2420	2300	3528	2766	4646	4916	5196	2658	2988	3278	2322	2316	2058	2324	2036	2222	2116	1954	4274	2571.33	3947	2213	101966
d__Bacteria	k__unclassified_d__Bacteria	p__Pseudomonadota	c__Alphaproteobacteria	o__Rhodobacterales	f__Roseobacteraceae	g__Primorskyibacter	2932	1662	2188	1658	1388	2008	1892	2374	1890	2032	1842	2244	2778	1610	1644	1842	1630	1440	2330	1622	1628	3884	2622	2612	1358	1352	1466	856	1700	1644	2384	1980	2148	2140	2424	2146	2260.67	1925.33	1824	2449.67	1396	2203.67	71350
d__Bacteria	k__unclassified_d__Bacteria	p__Bacteroidota	c__Flavobacteriia	o__Flavobacteriales	f__Flavobacteriaceae	g__Christiangramia	3872	2314	3248	1522	1324	1946	2074	2508	1972	1462	1590	1816	3384	2132	1904	3660	5320	7238	1920	1580	1602	3190	1806	1558	3344	3130	3106	4146	4054	4594	2300	2012	2296	2132	2314	2164	3144.67	1801.56	3939.67	1942.67	3729	2203	96534
d__Archaea	k__unclassified_d__Archaea	p__Euryarchaeota	c__Methanomicrobia	o__Methanomicrobiales	f__Methanomicrobiaceae	g__Methanofollis	1212	1200	1058	1726	1444	1854	1872	1878	2286	2000	2200	1878	3246	3038	1988	3122	2834	2316	1622	1496	2054	1958	950	710	3812	3648	3390	2970	2960	4098	2138	2170	2008	2374	2310	2176	1156.67	1904.22	2757.33	1465	3479.67	2196	79996
d__Bacteria	k__unclassified_d__Bacteria	p__Pseudomonadota	c__Gammaproteobacteria	o__Methylococcales	f__Methylococcaceae	g__Methylomarinum	2082	1690	1758	2288	1930	2572	2482	2760	2844	2858	3000	2534	1534	1220	1124	930	1076	1228	2170	1752	2352	1962	2280	1940	6698	6928	7450	3912	4310	5238	2406	2232	2202	2254	1948	2132	1843.33	2585.33	1185.33	2076	5756	2195.67	96076
d__Bacteria	k__unclassified_d__Bacteria	p__Actinomycetota	c__Actinomycetes	o__Micrococcales	f__Microbacteriaceae	g__Rhodoluna	204	238	148	192	170	206	162	194	280	256	294	224	436	360	290	252	232	180	224	230	386	528	194	174	760	728	814	376	436	636	2280	2068	1966	2608	2376	1838	196.667	219.778	291.667	289.333	625	2189.33	22940
d__Bacteria	k__unclassified_d__Bacteria	p__Actinomycetota	c__Actinomycetes	o__Pseudonocardiales	f__Pseudonocardiaceae	g__Gandjariella	716	478	486	596	558	658	624	700	572	650	644	624	962	736	790	596	376	474	808	828	1124	1360	534	444	1414	1442	1408	1196	1528	1638	2364	1954	2010	2358	2524	1912	560	625.111	655.667	849.667	1437.67	2187	38086
[truncated: 3,622 more rows]
[truncated: 6 more columns]
