# Supplementary material for: Divergent microbial community and functional dynamics in mangrove sediments along a polycyclic aromatic hydrocarbons (PAHs) gradient in China
Source: Research Square preprint supplement (doi:10.21203/rs.3.rs-7178259/v1), 2025-09-17
Supplement: Supplementary file 19 [file f812ddec954aa5e3c98287df.xlsx]

## Sheet: kegg_KO
KO	DY_1	DY_2	DY_3	CPT_LW_1	CPT_LW_2	CPT_LW_3	CPT_MZ_1	CPT_MZ_2	CPT_MZ_3	CPT_SW_1	CPT_SW_2	CPT_SW_3	FG_SC_1	FG_SC_2	FG_SC_3	FG_WR_1	FG_WR_2	FG_WR_3	M1_1_1	M1_1_2	M1_1_3	M1_2_1	M1_2_2	M1_2_3	M2_1_1	M2_1_2	M2_1_3	M2_2_1	M2_2_2	M2_2_3	M3_1_1	M3_1_2	M3_1_3	M3_2_1	M3_2_2	M3_2_3	Total	DY AVE	DY SD	CPT AVE	CPT SD	FG AVE	FG SD	M1 AVE	M1 SD	M2 AVE	M2 SD	M3 AVE	M3 SD
K12132	135818	108380	106974	234788	193200	224654	234986	278210	213194	267928	278472	241626	226502	210856	181284	148132	127936	159792	108636	95732	127704	120308	126276	103460	190336	172224	172040	247210	207626	285210	132020	123556	125598	134076	141222	133302	6319268	117057	16262.4	240784	29397.7	175750	37795.3	113686	13048.2	212441	45311.5	131629	6364.14
K20276	109058	98220	88630	121244	103760	130464	129438	144524	135638	130964	141162	131296	221240	167970	140096	189770	214542	144420	102076	93032	111146	144584	95296	85238	185726	172810	178374	210280	197120	238084	149892	136696	141736	152542	166762	145634	5249464	98636	10220.4	129832	11913.3	179673	34617	105229	21170	197066	24180.3	148877	10432.9
K01768	118844	82528	93564	202580	169648	199274	203792	232780	186980	203004	209942	189744	152156	116422	88790	83890	69890	86222	123610	100734	128152	109308	118838	104196	181560	176962	178246	160758	173594	217086	121208	111788	114056	114954	119174	116276	5160550	98312	18617.7	199749	17318.1	99561.7	29901.2	114140	11045.7	181368	18921.8	116243	3450.64
K02004	76840	58318	61506	88692	79194	91806	95988	107716	90240	106206	111948	96122	94542	76996	59260	68254	67998	63104	56726	49128	63240	60594	55152	42938	103650	98808	99716	129294	113702	140292	69878	65210	64446	68054	71906	67106	2914570	65554.7	9902.52	96434.7	10492.2	71692.3	12680.9	54629.7	7501.23	114244	17128.1	67766.7	2816.89
K07497	39146	35354	34346	66376	55648	67622	68752	79250	66984	66450	71662	65386	56388	42976	34574	35556	35866	35432	45692	40502	47236	45430	42204	37302	70094	65650	67270	62410	61690	79834	51784	48954	49484	53182	59584	52984	1939054	36282	2530.99	67570	6169.42	40132	8537.75	43061	3752.7	67824.7	6653.77	52662	3818.59
K02014	66706	47364	53434	31408	28608	38382	37472	45810	36630	32176	33960	35440	71114	47956	44740	63422	72892	41270	41052	32268	42738	62392	43968	44110	64622	65036	66290	67118	77828	79568	46428	42558	45366	43098	51440	43300	1787964	55834.7	9891.95	35542.9	4967.64	56899	13946.2	44421.3	9850.25	70077	6759.04	45365	3326.21
K02035	41536	32552	33274	55808	49418	58154	58018	63708	57644	56960	60714	57094	69108	52038	41936	49320	41624	43610	34902	30958	37854	37034	31088	27360	58100	54166	55758	57230	51208	70480	45654	43400	43074	48524	49988	44982	1744276	35787.3	4991.56	57502	3844.21	49606	10438.6	33199.3	4070.6	57823.7	6663.69	45937	2783.11
K03088	40840	30832	32092	56708	47838	57372	58726	66530	56076	61988	64488	61248	67604	53388	44880	47626	43164	43378	30648	27582	35176	41878	32116	28776	53404	48436	50408	58764	56942	74684	44798	41444	41112	45352	47924	42918	1737140	34588	5450.92	58997.1	5499.08	50006.7	9421.37	32696	5225.12	57106.3	9439.27	43924.7	2602.8
K01897	38250	30326	30356	47466	41282	50042	48552	54580	49028	48806	50856	49122	55660	42278	36158	39326	39100	36650	38340	32918	41010	42062	32250	26446	60834	58486	60590	63458	62194	78760	55000	50470	50664	56944	59102	50388	1707754	32977.3	4566.29	48859.3	3493.99	41528.7	7261.57	35504.3	6011.48	64053.7	7395.29	53761.3	3794.53
K00059	34560	24780	26544	51654	44824	53214	53214	59434	49912	55200	55404	52700	53098	38872	32828	36750	32960	34010	30350	26908	32256	37872	28500	24410	52240	50948	51334	48480	52086	64296	43324	39940	39838	44596	48924	41626	1547886	28628	5212.43	52839.6	4033.61	38086.3	7723.98	30049.3	4695.2	53230.7	5587.67	43041.3	3434.69
K21449	42438	30124	33852	35292	30484	36658	36936	41310	36620	39560	41986	38114	61360	46408	40816	54722	72256	40006	27272	23808	28210	36258	25112	22922	53932	49450	50352	74238	59676	74036	42616	38762	39410	42762	54368	41862	1543988	35471.3	6314.69	37440	3448.36	52594.7	12676	27263.7	4841.8	60280.7	11318.7	43296.7	5675.41
K02482	34960	26748	30080	48658	42520	52212	56024	63404	56212	57922	61958	53776	45178	39262	32736	32368	34382	32550	36592	29022	31284	22460	26352	19148	47578	43314	43680	67024	49364	75402	30260	29208	28826	31214	31572	30986	1474236	30596	4130.25	54742.9	6468.62	36079.3	5161.47	27476.3	6257.34	54393.7	13492	30344.3	1120.62
K01134	27510	26736	22444	41078	33018	40100	41562	52288	40184	40456	42868	40034	50464	37106	29430	32368	32832	26358	31680	30104	38236	38570	27800	22992	59528	57762	58722	56722	63240	72906	37294	34464	34872	36936	38748	36938	1434350	25563.3	2729	41287.6	4961.14	34759.7	8491.89	31563.7	6056.26	61480	6025.45	36542	1603.18
K03556	20100	19758	18222	33098	30768	40696	41376	39540	49902	35246	41868	38044	50442	43636	31508	32514	27276	29942	30208	27970	37278	26802	17204	13602	61684	57838	57324	44440	42964	64920	49184	47136	46446	52052	53844	49134	1403966	19360	1000.26	38948.7	5628.88	35886.3	9076.79	25510.7	8707.1	54861.7	9086.27	49632.7	2843.47
K03296	33434	28858	27574	35730	29892	36234	37610	43140	36726	39348	42558	37800	42626	36366	30924	36474	41004	31908	34030	27930	33208	36744	34392	30666	50230	48418	48940	59816	54882	65976	33012	31210	32078	31328	32576	32638	1366280	29955.3	3080.26	37670.9	3934.84	36550.3	4690.32	32828.3	3099.52	54710.3	7013.93	32140.3	738.454
K01990	33228	26014	27192	36800	33166	40404	40558	43730	40660	41722	43446	40376	47714	38820	30396	35440	31536	32110	26566	23496	30718	33812	22672	18772	43094	41324	42644	43730	43286	54756	46262	42376	42054	48200	51448	42572	1361094	28811.3	3870.03	40095.8	3291.38	36002.7	6510.73	26006	5535.28	44805.7	4943.69	45485.3	3832.9
K07486	21552	21444	19828	46678	39420	48556	49732	56546	49410	44808	47566	45288	34448	26808	22048	22350	20966	22888	32844	30094	36928	31600	28680	23430	55336	54690	55264	49582	49096	62686	35640	32906	32544	35532	36274	34124	1357586	20941.3	965.686	47556	4605.07	24918	5078.66	30596	4504.01	54442.3	4933.54	34503.3	1550.47
K01992	34794	25312	26820	34020	29874	37896	37380	40208	37596	38314	40734	38130	46910	36610	29156	34674	30096	30464	25050	23086	28928	33332	21948	17872	41242	38982	40558	38912	40366	50906	45356	41572	41130	47328	52576	41752	1299884	28975.3	5095.21	37128	3317.62	34651.7	6672.26	25036	5452.2	41827.7	4541.07	44952.3	4476.74
K07315	27140	23338	23134	32364	28232	36320	37356	39224	41600	36404	40770	36784	41218	36440	28620	33412	35682	30368	31064	25850	29220	23398	21362	16760	47350	43444	44626	52672	41782	63708	29714	27956	27414	29976	31892	30046	1226640	24537.3	2256.28	36561.6	4152.56	34290	4535.62	24609	5255.18	48930.3	8180.5	29499.7	1614.16
K00249	26424	19578	20154	39906	35702	41500	39648	44544	35814	40976	41060	39200	38384	29520	25286	26402	21420	25864	24758	22078	28226	31664	24244	21098	40740	40104	42368	35004	44518	47372	39652	36024	37294	40348	43538	35522	1225934	22052	3797.2	39816.7	2771.28	27812.7	5791.47	25344.7	3962.25	41684.3	4215.75	38729.7	3041.73
K11527	25152	23354	21766	32258	29484	36758	37084	40000	40512	33194	36760	36012	37456	31766	27814	32634	36128	30156	29416	25034	26562	29442	22794	18990	43566	39762	41798	49650	42084	58606	28034	26488	26128	28658	30536	28060	1183896	23424	1694.09	35784.7	3581.25	32659	3621.66	25373	4045.37	45911	7071.28	27984	1591.1
K07114	25760	21472	20046	34782	29138	36232	36746	41526	36132	36574	39132	36312	39930	34438	28948	30052	29394	28464	22274	19954	25476	30062	21196	18388	42258	40254	41226	47382	42200	55020	31088	28112	28208	31068	32088	29296	1170628	22426	2974.06	36286	3339.82	31871	4497.4	22891.7	4248.82	44723.3	5616.78	29976.7	1670.47
K03321	17918	16974	14540	23348	20034	25522	25748	26830	27872	24378	26326	26406	38588	29706	24340	25766	25108	20700	25654	23204	29044	29164	18246	14286	47796	46344	47170	34870	40154	47058	46488	42924	43756	49130	53322	43692	1122406	16477.3	1742.91	25162.7	2337.29	27368	6207.41	23266.3	5995.31	43898.7	5241.97	46552	4040.86
K01999	25274	20980	20882	42152	37724	44094	44926	48576	44192	47342	50128	45312	36000	27526	21610	23968	20158	24728	24800	20536	23602	19502	19766	16088	34954	32914	33746	38360	32406	46906	25496	23606	23298	26154	27566	24434	1119706	22378.7	2507.91	44938.4	3659.97	25665	5671.04	20715.7	3125.22	36547.7	5501.38	25092.3	1629.19
K08282	19132	15368	14858	35782	31328	39914	40606	41664	43878	39612	42436	38798	45594	36868	27418	26946	20228	25446	17684	16862	22028	21960	14584	12154	41522	40960	40504	29864	32574	42416	30140	28962	28220	30922	32122	29378	1098732	16452.7	2334.34	39335.3	3787	30416.7	9181.78	17545.3	3947.3	37973.3	5339.83	29957.3	1413.82
K06147	22492	18434	18222	28110	25530	30932	29844	32418	30692	29186	30802	30100	41202	32000	26586	28972	26508	24458	22436	20940	25528	31200	19416	16942	37110	34696	36534	31436	35706	43062	31386	28728	28532	32056	35026	30412	1047634	19716	2406.42	29734.9	1982.89	29954.3	6084.28	22743.7	5046.64	36424	3819.09	31023.3	2411.15
K03046	27646	23472	23340	25056	23156	26342	25984	29212	25114	27446	27688	27906	35136	26234	23552	26654	26680	24352	23132	19472	22270	25744	24950	22586	28112	26494	27636	28524	30276	35104	32242	29520	30724	34414	37802	30786	984758	24819.3	2448.85	26433.8	1839.78	27101.3	4143.49	23025.7	2213.44	29357.7	3074.9	32581.3	3058.56
K03657	21170	17420	16506	22910	20294	25290	24528	26896	25466	25240	25740	25866	33342	25664	22036	24188	22938	21726	20198	17270	22276	25594	17390	14806	30200	29308	30586	30964	32250	40448	39084	34540	35104	39838	44552	34848	966476	18365.3	2471.53	24692.2	1972.82	24982.3	4346.11	19589	3917.69	32292.7	4110.4	37994.3	3943.99
K01537	21702	18550	17378	19776	17576	21438	21462	23162	22768	21404	22122	21862	39028	30326	25494	28740	27412	22624	20414	18216	22304	26342	16032	13030	30990	29946	31834	25564	28734	34570	38234	35048	35036	40228	42034	35358	946738	19210	2236.28	21285.6	1690.36	28937.3	5618.37	19389.7	4711.14	30273	3035.3	37656.3	3002.1
K02003	23144	19210	18670	22678	20244	25276	25266	27028	26122	26168	28440	25272	33526	26000	21388	24906	24836	21386	19422	17154	21132	23258	16100	13848	36884	34292	35106	36354	33896	44196	27014	25638	24838	27706	27860	26050	930308	20341.3	2442.15	25166	2412.3	25340.3	4452.89	18485.7	3453.34	36788	3807.86	26517.7	1206.16
K03701	23542	19488	19518	25150	23086	26328	26664	30296	25510	27688	29496	27918	33796	26518	22098	25718	26594	23530	18914	15774	19772	21020	18402	16180	26954	25464	26406	28478	27592	34042	30566	27778	27902	30594	32132	28094	919002	20849.3	2331.97	26904	2231.96	26375.7	4048.66	18343.7	2040.4	28156	3060.1	29511	1830.61
K00626	19902	15994	15644	27720	24444	29194	29036	31930	28156	30378	30662	29340	29490	23000	19178	21722	19790	21248	19688	16186	21088	22630	17570	15734	30210	28886	29958	29722	29972	37158	28296	26562	25976	29100	32252	26636	914452	17180	2363.81	28984.4	2136.18	22404.7	3731.17	18816	2772.62	30984.3	3059.03	28137	2336.21
K02355	25536	21386	21232	23964	20744	24998	24994	27390	24406	26590	26676	25298	31980	25430	22074	24524	25006	22052	20096	16458	19708	22912	20022	17044	28084	26224	27228	30494	29798	36270	29834	27260	27488	30716	32224	27624	913764	22718	2441.67	25006.7	1958.23	25177.7	3638.54	19373.3	2345.3	29683	3594.66	29191	2050.49
K13587	15702	13798	14340	26472	23762	30386	32376	32792	37642	30078	35900	30858	25470	23572	19682	22224	26134	22016	21430	16768	18146	13480	17342	12794	30796	26936	26558	54452	31976	53458	17528	17036	16986	19118	18414	18516	894938	14613.3	980.988	31140.7	4289.4	23183	2392.85	16660	3177.93	37362.7	13028.4	17933	876.461
K03043	25276	21362	21512	23712	21526	23832	23618	26910	22556	24738	25774	25766	32496	24476	22072	24456	24296	22286	20276	16606	19180	22196	22324	20278	24460	23052	23710	24704	25946	31214	29064	26704	26868	30018	32990	27264	883518	22716.7	2217.72	24270.2	1698.69	25013.7	3826.07	20143.3	2118.74	25514.3	2958.36	28818	2432.8
K04771	18942	14812	15678	28140	24178	28306	29932	34652	28424	30012	31712	28868	33154	25736	19944	22798	21298	19926	17612	15656	18628	19084	16828	12944	28932	26656	27330	30940	27974	37968	22680	20640	21018	23550	24946	22410	872308	16477.3	2177.94	29358.2	2847.37	23809.3	5067.26	16792	2253.68	29966.7	4193.39	22540.7	1598.24
K06015	20674	14880	16326	21150	17938	21012	21614	24800	19574	22456	22960	21268	26644	22600	19168	18104	17314	15230	21668	19340	23936	21400	18434	14754	32380	30960	32466	26796	33014	35702	33350	31708	31698	32446	33806	31846	869416	17293.3	3015.69	21419.1	1959	19843.3	4123.35	19922	3181.39	31886.3	2938.72	32475.7	908.37
K07001	19770	15446	15600	21198	17674	21078	21982	24260	21370	21880	22700	21568	32904	23324	18858	22342	22860	17234	16378	14846	18604	21752	14718	12106	33692	31808	32716	29818	31724	38112	31442	29240	29170	31154	33526	28836	861690	16938.7	2453.22	21523.3	1744.94	22920.3	5459.15	16400.7	3381.85	32978.3	2823.59	30561.3	1820.69
K01652	20536	16438	16138	30514	26498	30710	31680	35060	27594	32908	33594	30362	28176	22462	18288	19852	17794	19096	16640	14304	17678	20796	17510	16706	26022	24958	26748	23498	26432	31104	23702	22106	22032	24392	25616	22070	860014	17704	2457.17	30991.1	2736.58	20944.7	3903.6	17272.3	2105.65	26460.3	2564.05	23319.7	1500.8
K11690	28706	20394	22040	30928	26080	31020	32032	37496	29370	32216	33846	30882	28880	19654	17036	19246	19874	17924	17562	13478	15436	19650	19334	17184	25424	25182	26580	25478	24496	32220	19042	17676	18036	19662	20736	18806	853606	23713.3	4401.41	31541.1	3104.21	20435.7	4278.19	17107.3	2349.52	26563.3	2851.53	18993	1111.15
K00548	20416	17298	16294	21796	19546	23438	23148	25684	22804	23586	24768	22968	28782	21442	18318	21674	22028	18954	16138	13918	17406	19858	16176	15626	26816	24650	26202	27018	26810	34062	24080	22432	22318	24698	25996	22788	799936	18002.7	2149.45	23082	1740.89	21866.3	3718.66	16520.3	1988.02	27593	3286.08	23718.7	1466.93
K00525	23674	18966	18912	21638	19654	21940	21584	24534	19876	22666	23250	22632	27960	21438	18892	22106	22318	19728	16460	13486	16224	19920	19310	16326	22182	20948	22016	22036	23838	27448	25456	23496	24026	26054	28322	23688	783004	20517.3	2733.89	21974.9	1546.92	22073.7	3185.56	16954.3	2347.18	23078	2333.57	25173.7	1849.63
K02337	20036	16092	16492	20432	17762	22004	21380	24106	21484	21822	23524	22546	28158	22038	18432	22176	23452	19478	16900	14524	18080	20088	15436	13194	24958	23154	24088	25686	25372	31700	24632	22628	23278	25224	27574	23224	781154	17540	2170.83	21673.3	1843.81	22289	3424.96	16370.3	2505.82	25826.3	3021.37	24426.7	1821.24
K00666	15858	12130	12524	24656	21568	26504	25460	29420	24466	26456	27572	26900	24224	18244	15292	17680	15250	17080	15376	12732	15962	17010	13712	11742	27310	28196	28652	24608	26430	30744	20864	18750	19406	20210	21130	19246	753364	13504	2048.12	25889.1	2219.87	17961.7	3305.55	14422.3	2025.93	27656.7	2084.82	19934.3	951.365
K01915	19950	15744	15786	23258	19864	22698	22266	25762	20182	22822	23420	22804	27986	20172	17244	20166	19442	17990	14814	12260	15640	18208	16648	15748	20150	18830	19676	21188	22586	26456	24556	22784	23440	25796	27908	22942	747186	17160	2416.3	22564	1754.87	20500	3854.36	15553	1984.12	21481	2760.97	24571	1988.09
K04763	11282	10402	9734	20526	17420	22024	23206	25748	24344	21176	22946	21572	19066	15822	12014	14308	15270	12840	19458	17408	19140	21898	14334	12482	34368	33484	33756	31574	29768	39272	19146	17988	17760	20346	21032	18718	741632	10472.7	776.416	22106.9	2392.7	14886.7	2500.58	17453.3	3494.71	33703.7	3210.1	19165	1299.23
K03388	16806	15280	16410	12518	12266	17946	20398	18950	24552	17862	21652	17954	18424	19716	14334	13026	10730	15048	26156	20786	23232	10828	11878	7342	33814	29950	30622	46950	29152	51146	17306	17476	16242	19052	18368	18484	732656	16165.3	791.875	18233.1	3958.93	15213	3354.63	16703.7	7669.19	36939	9604.3	17821.3	1013.08
K07263	22486	16704	16958	19026	16762	19874	20528	23902	19612	22984	23352	21278	24358	19828	17620	20088	22840	18082	15372	13288	15818	18484	15984	13456	24174	22314	22936	31464	27468	36182	18300	16260	17458	18052	20424	17788	731504	18716	3267.38	20813.1	2316.44	20469.3	2650.15	15400.3	1911.4	27423	5474.36	18047	1365.4
K05349	15520	13500	12656	14308	13718	18690	17640	17704	20296	16538	17844	18502	24190	17112	14864	18606	19764	15764	13656	12550	15980	19994	11090	9574	34152	33592	33890	36792	34752	42044	20564	19598	19122	21006	22088	19880	727540	13892	1471.69	17248.9	2099.63	18383.3	3362.62	13807.3	3739.09	35870.3	3233.56	20376.3	1075.83
K00344	18396	13916	14012	23302	20524	24516	24212	27786	22860	26780	26750	25696	23874	17922	15360	16236	13300	15442	13800	12028	15710	18948	12908	11438	22598	22028	22288	19004	21586	25702	23364	21224	20964	23580	26172	20932	725158	15441.3	2559.27	24714	2293.84	17022.3	3673.95	14138.7	2792.01	22201	2147.14	22706	2077.88
K03320	17522	14320	14214	22236	19618	22590	22538	26252	21154	23714	25144	23852	25966	18416	16350	18532	16962	16484	14734	12184	14256	21498	16714	14954	22976	22230	23016	20948	22440	26568	20782	19288	19692	21424	23526	20118	723212	15352	1880.02	23010.9	2006.79	18785	3641.82	15723.3	3180.53	23029.7	1889.09	20805	1536.2
K02031	18942	15074	15158	21512	18996	23356	21808	24224	22424	21556	22652	21974	28248	20674	17348	20146	17538	17660	15180	12652	14948	17232	14742	13012	23126	20888	22396	21948	21464	28038	20124	18204	18462	20978	21816	18956	713456	16391.3	2209.34	22055.8	1451.66	20269	4162.72	14627.7	1656.32	22976.7	2595.59	19756.7	1455.71
K01895	18448	14386	14622	19578	16980	19668	20202	22294	18348	21072	21142	20814	26200	19472	16968	19414	18628	17120	14304	11822	14552	18638	14596	12764	19224	18888	20014	19968	20834	25118	26206	23542	24464	28140	30606	24344	713380	15818.7	2280.12	20010.9	1602.96	19633.7	3394.9	14446	2338.43	20674.3	2280.4	26217	2709.17
K03070	19178	15762	15540	19360	17550	20190	19446	22160	19232	20368	21334	20806	26326	19374	17000	19396	19302	17464	15406	12846	15798	17590	15846	13662	20964	19408	20096	21354	22078	26366	23458	21850	21968	24764	27506	22528	713276	16826.7	2039.34	20049.6	1348.75	19810.3	3360.88	15191.3	1699.16	21711	2465.81	23679	2166.54
K00265	16612	14342	13404	19488	17266	20408	19600	22412	19558	20718	20850	21160	24036	16872	14970	16962	15700	15688	14418	12126	15760	18684	14828	13434	23008	22714	23056	18864	23220	26040	25150	22710	22974	25534	28164	22600	703330	14786	1649.44	20162.2	1432.8	17371.3	3353.45	14875	2242.15	22817	2292.62	24522	2193.46
K01784	15432	11898	12270	18234	16198	20336	19802	22476	19536	20988	22304	20620	24954	19172	15380	18936	17706	16718	14088	12802	15724	17896	11420	9824	25640	24046	25272	25002	24176	31652	22304	19896	20224	22956	25142	20840	701864	13200	1941.9	20054.9	1959.39	18811	3324.33	13625.7	2927.41	25964.7	2854.41	21893.7	1986.82
K01338	20660	16280	17000	20122	16824	20098	20700	22842	20290	21348	23334	20890	24378	20504	17710	19358	20290	17896	16570	13680	15620	14566	15508	14190	21852	20482	20600	25298	21902	30202	18090	17166	17126	18478	19312	17522	698688	17980	2348.7	20716.4	1866.4	20022.7	2432.49	15022.3	1066.89	23389.3	3764.68	17949	852.084
K03737	18350	16548	14880	14772	12560	15748	15744	17150	16506	17118	18160	17220	21274	16990	14122	16520	17818	14548	15488	13698	17652	18494	14630	12498	24346	23746	24002	25280	25598	30318	26998	25138	24934	27440	27258	24416	697962	16592.7	1735.43	16108.7	1671.33	16878.7	2583.55	15410	2304.9	25548.3	2445.79	26030.7	1344.25
K03924	15052	13072	11822	20452	17358	20554	20946	23012	20032	20870	22200	21214	25496	20700	16622	18954	17742	17320	13926	12436	15504	17414	14530	12512	23024	22000	22700	23576	24204	28738	20194	18498	18740	20622	22334	19786	694156	13315.3	1628.69	20737.6	1566.62	19472.3	3280.59	14387	1895.54	24040.3	2420.86	20029	1396.88
K02033	19002	14558	14984	21010	19576	22752	21748	24128	22724	22338	23036	22322	28942	21676	17406	20948	17638	18606	14016	12464	15054	15254	12120	10936	21616	19304	20824	20800	18980	26406	17574	16164	16834	18928	19238	17370	687276	16181.3	2452.04	22181.6	1300.58	20869.3	4321.66	13307.3	1737.05	21321.7	2683.7	17684.7	1192.14
K07636	16918	13408	14634	18048	16500	20192	20678	21156	23776	19728	22112	19552	24822	21212	16662	20370	22732	17994	14222	12160	14454	15350	10728	9192	22926	20204	20864	28992	21478	32600	17704	17168	16492	18348	19568	18092	681036	14986.7	1781.38	20193.6	2137.45	20632	3003.03	12684.3	2404.18	24510.7	5080.82	17895.3	1056.06
K07493	10376	11386	8930	18708	15914	18930	19212	20988	19584	18092	19330	18500	18786	15360	12258	13242	14030	11838	17306	16064	20494	15952	14890	11986	26328	25176	25956	26050	23970	31588	23206	22018	21564	24234	26410	22016	680672	10230.7	1234.43	18806.4	1360.05	14252.3	2555.69	16115.3	2799.02	26511.3	2629.41	23241.3	1835.13
K07090	16044	12326	12556	19424	16064	19972	20370	22290	19826	19970	21040	19686	22284	16890	14498	17360	16116	15384	13376	11224	13574	15504	11922	9340	23996	22770	23540	27706	24196	32930	20808	18964	19232	21642	25260	20114	678198	13642	2083.37	19849.1	1666.29	17088.7	2744.74	12490	2139.73	25856.3	3861.77	21003.3	2308.8
K14445	16142	12760	12904	14842	13416	16510	16852	17840	17862	15664	16818	15360	24192	19110	15950	18832	21438	14778	16676	14018	16774	17988	14396	12124	27166	26040	26764	26296	26082	33106	20030	18260	18658	19946	20246	19454	675294	13935.3	1912.39	16129.3	1453.35	19050	3465.65	15329.3	2183.3	27575.7	2743.65	19432.3	807.16
K02034	18048	13340	14378	20174	18160	21594	21428	22874	21570	20926	22178	20542	27748	21122	16228	20858	18164	18132	13326	11792	13626	13868	11160	9914	22178	19946	20572	21282	18918	27002	18412	17832	17506	20156	20206	18090	673250	15255.3	2473.58	21049.6	1355.61	20375.3	4056.34	12281	1582.28	21649.7	2849.13	18700.3	1185.08
K04077	18206	15914	15052	20454	17740	20496	20810	23172	19118	21628	21676	20586	23480	18624	15710	16616	15592	16018	14908	12890	15974	16810	16126	15008	17868	16594	17684	17056	19308	22836	21582	19332	19906	22518	24458	19600	671350	16390.7	1630.13	20631.1	1552.15	17673.3	3055.02	15286	1375.68	18557.7	2289.85	21232.7	2010.72
K06889	15174	11512	11818	16666	14554	18114	18346	20452	19082	17794	19198	17730	21664	17256	12978	15930	16204	13700	13976	12190	15508	16892	11584	9410	26450	25072	24872	26692	24326	32980	22928	20402	20476	23522	24804	20750	671006	12834.7	2031.69	17992.9	1677.81	16288.7	3086.34	13260	2739.85	26732	3197.58	22147	1862.75
K05366	15350	12272	12442	19264	16694	20360	19940	22226	19136	20626	20824	21058	20288	16088	14088	16202	15754	15222	14226	12278	15290	17280	13022	10620	22108	21502	21514	22308	22582	27600	21672	20184	20394	23556	26030	20254	670254	13354.7	1730.1	20014.2	1561.03	16273.7	2112.23	13786	2347.12	22935.7	2325.37	22015	2353.46
K10914	14504	11498	11562	20904	17528	21550	22124	25454	21362	23200	24072	22094	24432	18514	14876	15858	14328	13924	14148	12168	14256	14486	11350	8936	22758	21084	21696	21578	21356	28590	19988	18382	18236	20840	22948	18616	669200	12521.3	1717.34	22032	2221.71	16988.7	3998.57	12557.3	2184.43	22843.7	2872.5	19835	1837.29
K01069	15458	11574	11666	17276	15058	17716	17730	19580	17934	18110	19300	17430	25120	18562	15298	18382	17276	15418	14274	12344	15102	17058	11658	9506	23640	22806	23198	25828	22854	31424	21370	20072	19692	22090	23976	20434	666214	12899.3	2216.35	17792.7	1297.79	18342.7	3603.98	13323.7	2695.17	24958.3	3360.32	21272.3	1589.28
K01997	15496	11786	12618	24932	22330	26366	26544	29564	26148	27890	29156	27406	23704	16552	13142	15166	12002	15490	14146	11322	13380	12728	11220	9364	20278	19030	20114	21448	19098	27400	14968	14296	13762	15676	16832	14702	666056	13300	1946.76	26704	2202.62	16009.3	4117.37	12026.7	1735.05	21228	3151.3	15039.3	1088.3
K07003	17950	13960	14692	19790	17156	20776	20242	23536	18970	20506	21342	19752	18292	15324	12760	15448	17438	14280	17822	14852	17840	18188	16730	14762	24118	22360	24086	28436	25750	31822	14682	14014	14110	13918	15246	14826	665776	15534	2124.09	20230	1732.04	15590.3	2026.42	16699	1545.6	26095.3	3472.54	14466	532.165
K01955	17868	14830	14658	18078	16142	18192	18574	20788	17190	18804	20144	18662	22702	17836	16340	17700	18694	15694	14184	11826	13894	16570	15320	13154	19028	18382	18684	20434	20716	25266	22604	20358	20516	23364	25314	20832	663342	15785.3	1805.69	18508.2	1396.89	18161	2474.88	14158	1654.36	20418.3	2556.42	22164.7	1965.09
K21395	19366	13978	15188	23108	20508	23258	23592	27310	22252	22828	23774	22680	21018	14412	12306	14424	14578	13274	13396	10898	12108	15968	13834	12550	22050	21236	22250	20624	20736	27940	14526	13322	13480	14820	15102	13696	646390	16177.3	2826.96	23256.7	1799.74	15002	3075.99	13125.7	1731.08	22472.7	2759.81	14157.7	753.237
K00635	12790	9974	9452	12714	10960	13284	13142	14736	12736	13028	13202	13216	19146	14496	11752	12064	11284	9562	12080	11108	16876	19854	9948	8178	24782	24786	25988	18918	25510	26424	34000	30152	30420	33982	35900	29100	645544	10738.7	1795.58	13002	969.266	13050.7	3382.13	13007.3	4449.56	24401.3	2763.97	32259	2722.4
K07052	14798	11214	12112	16936	15210	19316	19300	19974	20944	18332	19668	18764	22316	17516	13520	18900	17674	16308	12086	11218	14694	16546	9998	8068	21910	20692	20952	24362	21110	30046	20542	18970	18276	21024	22678	19078	645052	12708	1864.85	18716	1723.52	17705.7	2904.89	12101.7	3096.75	23178.7	3621.91	20094.7	1633.61
K04043	16456	13888	13706	18144	16176	18748	18590	20644	17802	19274	20054	19272	22324	18524	16466	17294	17098	17258	13930	12012	14140	16416	15514	13908	18382	16760	17208	22862	20362	26152	19230	17684	17898	20382	21934	18232	644724	14683.3	1537.87	18744.9	1311.08	18160.7	2146.27	14320	1516.57	20287.7	3649.2	19226.7	1661.26
K01998	17230	12536	13856	23494	20968	24838	25892	27900	25402	28172	28994	26508	22156	16062	12716	14340	12348	14864	13712	10902	12680	11700	11714	9382	18578	17616	18010	21554	16782	26814	14274	13396	13144	15210	15066	14028	642838	14540.7	2420.74	25796.4	2512.4	15414.3	3577.99	11681.7	1484.36	19892.3	3762.9	14186.3	844.458
K02469	14866	12884	12504	16568	15046	17956	17082	19494	16898	17944	18662	18128	22654	17080	15246	18032	17906	16434	13424	11890	14230	16684	13498	11242	18872	17398	18486	19324	20088	23630	22748	20200	20754	23554	25990	20996	638392	13418	1268.32	17530.9	1301.2	17892	2548.84	13494.7	1916.61	19633	2152.6	22373.7	2184.37
K01286	13778	9476	10764	15272	13652	17050	17114	18812	17658	17064	18170	17068	24214	18816	14852	16310	15890	13794	12358	11498	14452	15960	10200	7794	27106	26226	26194	24374	24566	30720	19868	18416	18014	20288	21352	18772	637912	11339.3	2207.95	16873.3	1547.58	17312.7	3777.66	12043.7	2932.34	26531	2306.46	19451.7	1271.65
K10716	12396	9938	9776	15534	13464	16132	15678	18214	15940	16226	16722	15708	19266	14778	12282	14358	14232	11542	14336	12560	15524	16706	11734	10376	25778	24696	25898	21916	23718	29936	23892	22016	21260	24636	25872	22042	635082	10703.3	1468.13	15957.6	1240.78	14409.7	2702.01	13539.3	2401.1	25323.7	2697.93	23286.3	1796.79
K03798	16002	13186	13374	17022	15184	17766	17968	19868	17206	19192	19970	18622	21448	17096	14676	15954	15036	15074	14684	12316	14246	16548	14624	12996	19756	18300	19226	19640	19904	25646	20628	19036	18796	21678	22768	19142	634578	14187.3	1574.36	18088.7	1528.07	16547.3	2554.46	14235.7	1477.88	20412	2628.55	20341.3	1630.21
K01870	16262	13300	13450	17346	14654	17666	17234	19770	17334	18464	19038	18444	21904	16836	14576	17664	17158	15782	13596	11614	14116	16352	13324	11712	19072	18402	19056	19832	20128	24452	20072	18162	18766	21252	23258	19002	629050	14337.3	1668.5	17772.2	1454.35	17320	2501.47	13452.3	1748.93	20157	2191.94	20085.3	1899.5
K02005	17622	13460	13956	16296	14380	18038	18970	20846	18866	19240	21316	18432	24414	19184	15616	18268	19202	15548	11400	9718	11968	15956	10894	9014	22152	20450	20666	27284	22640	30398	15860	14148	14156	15616	16586	15484	628044	15012.7	2273.32	18487.1	2132.62	18705.3	3248.65	11491.7	2441.62	23931.7	4016.81	15308.3	973.297
K01995	14382	11250	11732	23056	20620	24572	24792	27184	24066	26728	27508	25348	21958	15998	12664	14024	11294	14494	13330	10892	12612	12274	10846	8730	19384	18338	19248	20052	18488	27130	14136	12842	12812	14470	14954	13422	625630	12454.7	1686.43	24874.9	2181.99	15072	3735.74	11447.3	1651.55	20440	3336.81	13772.7	886.095
K02335	16476	12986	13088	15582	13814	16056	15840	17732	15774	16718	17362	16422	20512	16248	13550	16048	17286	13792	13112	11202	13964	16834	13090	10668	21068	20284	20706	20500	21204	25564	22340	20394	20630	22922	24584	20352	624704	14183.3	1986.16	16144.4	1139.84	16239.3	2553.81	13145	2199.74	21554.3	1994.08	21870.3	1715.45
K00681	16518	12226	12426	18210	15158	17646	17532	20106	15872	18816	19024	16844	20840	16450	13872	15516	15930	13094	14610	12434	15742	18794	15918	13626	21452	20080	20632	21542	23360	26600	17966	16598	16396	17680	17852	16446	623808	13723.3	2422.32	17689.8	1565.79	15950.3	2713.88	15187.3	2200.07	22277.7	2392.28	17156.3	749.42
K00341	17478	13912	13948	16600	14950	17470	17934	19148	17296	18472	19436	18236	24780	18864	15856	17762	16470	15804	11786	10646	12948	13512	12156	10336	19286	18358	19048	17404	18304	21558	19432	18206	18648	20794	22546	18976	618360	15112.7	2048.52	17726.9	1370.7	18256	3409.94	11897.3	1248.52	18993	1419.22	19767	1625.08
K02027	9996	9772	9010	19652	17836	20998	20434	21886	21742	19488	20248	20896	28026	20222	15918	18010	14910	15052	12780	11394	14084	14302	9206	8072	20658	18744	20092	17294	15984	23572	17386	16352	16310	18810	18626	17086	614848	9592.67	516.884	20353.3	1254.13	18689.7	5003.55	11639.7	2571.94	19390.7	2683.32	17428.3	1083.66
K03699	14782	11296	11654	14280	12914	15646	15702	17322	15718	16370	17124	15812	20896	15578	13140	16358	16698	13978	12770	11438	13776	17166	11928	10640	22984	21488	22530	20816	20636	25718	21512	19030	19552	21718	24358	19768	613096	12577.3	1917.67	15654.2	1363.94	16108	2718.91	12953	2330.49	22362	1887.37	20989.7	1977.3
K03086	15916	13024	13308	17948	15522	17804	18160	20840	17196	18930	20140	18682	21208	17116	14912	16268	15534	14774	13698	12522	15076	14788	14134	12092	17448	15344	16344	19128	17824	23760	18632	17428	17136	18952	20058	17854	609500	14082.7	1594.05	18358	1568.25	16635.3	2405.1	13718.3	1203.06	18308	2966.92	18343.3	1088.93
K01953	13422	9164	10418	19030	16298	18262	18836	22366	17570	19252	20392	18382	19598	15616	12528	15350	16770	13256	11776	10090	12480	12414	13402	11020	22684	21700	22216	22554	20580	27504	16392	15644	15050	16532	17050	15762	601360	11001.3	2188.12	18932	1717.18	15519.7	2541.99	11863.7	1175.97	22873	2393.7	16071.7	720.313
K00615	13242	11450	10980	16052	13938	16680	17364	19040	17462	18896	19088	18092	21508	17094	14736	16670	16808	14794	13256	10870	13208	13264	11034	9834	20444	19428	19876	21986	20300	26546	17802	15686	16046	18312	20028	16804	598618	11890.7	1193.65	17401.3	1680.1	16935	2467.53	11911	1515.82	21430	2651.59	17446.3	1613.27
K17686	14300	12116	12480	16942	14794	17368	18414	20368	18898	18516	19754	18412	21402	16710	13752	20028	20610	17038	11172	9362	11480	11884	9626	8088	17182	16484	16908	17138	16686	21848	18836	17138	17628	19362	23132	17900	593756	12965.3	1170.1	18162.9	1645.3	18256.7	2923.64	10268.7	1475.33	17707.7	2045.67	18999.3	2181.32
K01869	15444	12734	12712	16538	14920	16824	16822	18852	17130	17110	18068	17536	21528	16332	13832	16358	16440	14768	12492	10362	12814	14570	11964	10572	17824	17800	17696	18324	18954	22428	18806	17428	17772	20070	21988	17688	593500	13630	1571.01	17088.9	1085.02	16543	2662.32	12129	1557.77	18837.7	1820.74	18958.7	1777.69
K03466	13006	11130	10554	14910	13408	15486	15390	17240	15692	15430	16430	16112	22292	16308	14324	16838	16892	14264	11644	10442	12996	15120	10558	9590	19620	18618	19664	19138	20468	24040	20548	18420	19988	21736	24340	19588	592224	11563.3	1282.15	15566.4	1061.01	16819.7	2931.67	11725	2035.4	20258	1952	20770	2061.96
K07484	8046	9410	6484	17192	14722	16540	16064	18938	17362	14186	15408	14606	15824	13656	11806	13966	15526	10878	13672	12908	14572	20392	14240	14774	27470	27428	27248	21718	21368	27600	15784	15466	14892	16846	17108	16380	590480	7980	1464.12	16113.1	1553.46	13609.3	1970.78	15093	2682.3	25472	3047.49	16079.3	849.646
K07045	10954	7220	8810	28092	23890	26900	26350	30252	22632	28704	28690	27268	17412	13550	10790	10122	7312	13366	9658	8264	10662	10344	9236	8474	18506	17146	17990	18850	18916	23912	13120	11702	11378	13086	14648	12238	590444	8994.67	1873.84	26975.3	2418.11	12092	3477.81	9439.67	971.161	19220	2390.33	12695.3	1189.71
K00688	13610	11122	11002	14364	13002	15704	16778	18488	17180	16698	18632	17680	17542	14210	12318	12334	12448	11742	13804	11992	13308	15684	11080	8908	23188	22390	23064	21318	21200	26588	19046	17814	17130	19356	19370	17674	587768	11911.3	1472.31	16502.9	1867.51	13432.3	2180.29	12462.7	2352.01	22958	1966.92	18398.3	975.244
K03723	14054	11306	11462	15242	13584	15630	15874	17862	15674	16640	17316	16704	19858	15008	13240	15250	15708	13362	12576	10576	12782	14614	11876	9560	18382	18034	18660	19280	19426	23838	20666	18686	18702	20998	23896	18918	585244	12274	1543.5	16058.4	1262.14	15404.3	2406.81	11997.3	1776.12	19603.3	2140.69	20311	2030.77
K03695	14132	12116	11714	15590	13760	15280	15190	17196	14536	16228	16904	16252	19556	15528	13620	15114	15126	13630	13478	10752	13452	15734	13730	12532	17952	16686	17286	18522	18902	22308	20076	17884	18376	20892	23158	18336	581528	12654	1295.67	15659.6	1108.12	15429	2179.08	13279.7	1627.49	18609.3	1982.72	19787	2019.2
K01873	15474	11780	12452	15046	13452	15994	15760	17566	15770	16384	17106	16112	19406	15152	13134	15974	15832	13828	12450	10740	12878	14938	12156	10428	18908	17852	17674	19394	18720	23294	18884	17262	17558	19402	20540	17578	576878	13235.3	1967.64	15910	1187.21	15554.3	2194.93	12265	1628.93	19307	2058.7	18537.3	1294.94
K03797	15888	12266	12908	13766	11758	14572	14816	16684	14938	14226	15366	14406	21748	16722	14130	17536	20042	13316	12058	10648	12288	16092	11576	9738	22334	20614	20410	24492	21730	28258	15332	14394	14586	15390	16610	15124	576762	13687.3	1932.68	14503.6	1320.88	17249	3274.1	12066.7	2187.62	22973	2977.44	15239.3	782.911
K07494	8076	9120	7530	20084	17448	18808	19236	22362	18622	17688	18704	18306	15262	12820	9614	9402	8404	8936	14872	13448	15386	17080	14386	12778	23196	22228	22666	17286	18654	23872	15340	14444	14476	15690	15754	14918	566896	8242	807.894	19028.7	1475.02	10739.7	2703.49	14658.3	1517.52	21317	2685.1	15103.7	580.719
K00382	13810	11190	10918	14700	12640	15332	15122	17028	15546	16180	16702	16382	20020	15172	13264	15494	16310	13442	12836	10414	12882	14888	12216	10354	20284	19050	19298	20158	19400	25416	16630	15188	15846	16764	19260	15350	565486	11972.7	1596.98	15514.7	1323.39	15617	2463.62	12265	1712.74	20601	2409.43	16506.3	1495.03
K02358	19402	15482	15798	14922	13602	15104	15026	16150	15086	15764	16834	15248	20296	16366	13968	15350	14300	13982	13998	11824	13788	14390	14970	14238	15646	14542	15258	15524	16172	19176	17080	15814	15994	17370	19310	16504	564278	16894	2177.73	15304	899.923	15710.3	2433.1	13868	1079.35	16053	1620.37	17012	1276.18
K01681	14084	11652	11646	16204	14262	17068	16356	18074	15966	17516	18100	17366	20438	15976	13758	16020	15438	14802	11222	9680	11678	13368	11950	10966	16196	15690	16060	15442	16738	19654	18290	16694	17206	19280	21112	17150	563102	12460.7	1405.85	16768	1219.53	16072	2299.71	11477.3	1216.17	16630	1546.9	18288.7	1671.27
K02030	9456	8386	7994	15564	13452	16368	16324	18128	16808	16004	17188	15782	17340	12904	10484	11578	10966	10826	13974	12230	14328	14612	10990	9544	24814	23146	23964	20808	19830	28506	16360	15808	15808	17880	18092	16234	562480	8612	756.748	16179.8	1288.02	12349.7	2589.32	12613	2048.86	23511.3	3093.29	16697	1025.09
K01006	13342	11018	10874	13802	12130	14608	15118	16440	15454	16064	16560	15236	19636	15282	12982	14400	15072	12520	12460	10708	13172	13416	10794	9000	19386	18284	19158	20932	21250	24966	18208	16982	16566	18622	19072	16712	560226	11744.7	1385.2	15045.8	1401.87	14982	2536.06	11591.7	1715.43	20662.7	2386.97	17693.7	1074.05
K00384	13320	10042	11008	16288	14478	17550	17382	18910	17176	18200	19492	18266	19102	14602	12856	14760	13422	13466	11472	9696	12168	13672	10794	8706	19176	17556	18224	19086	17944	23702	16104	14904	14912	16776	18344	15428	558984	11456.7	1684.43	17526.9	1489.52	14701.3	2278.03	11084.7	1771.38	19281.3	2257.2	16078	1325.37
K02529	10348	8724	8450	16368	15152	19742	18928	20330	21052	17762	18858	22052	23662	15976	13090	16650	14954	13902	9418	8724	10694	13352	7116	6566	22016	21012	21334	19096	18674	24280	13112	12020	12354	13588	15452	12962	557770	9174	1025.9	18916	2210.03	16372.3	3801.61	9311.67	2488.03	21068.7	2044.97	13248	1214.97
K03738	13140	11732	11802	11216	9888	14016	15164	13716	19076	13008	16202	13444	15164	15386	11332	13214	14276	12340	18418	14840	17422	8522	8254	7008	23880	21310	21488	32440	19586	37034	13060	12748	12318	13636	13668	13458	553206	12224.7	793.474	13970	2692.46	13618.7	1610.66	12410.7	5073.29	25956.3	7088.01	13148	540.609
K01599	11928	11050	10106	10998	9756	12956	13722	13832	15106	13168	15026	13080	20190	16530	12536	15352	15364	12372	13404	11994	15548	11940	7150	6264	23240	20694	21706	26244	21180	31312	16310	15648	15214	17034	17812	16350	552116	11028	911.199	13071.6	1741.96	15390.7	2884.28	11050	3621.39	24062.7	4079.2	16394.7	935.76
K01007	12956	11112	11360	12556	11506	15004	15752	16220	17216	15220	16416	14972	19424	15950	13508	14074	15978	13374	13364	11630	12602	12864	10152	7624	20184	18084	18284	25952	19998	28814	14264	14052	13766	15616	16034	14820	550702	11809.3	1000.75	14984.7	1843.84	15384.7	2292.18	11372.7	2159.14	21886	4436.68	14758.7	904.955
K01055	10594	7744	8336	16240	14726	17430	17786	19370	16388	18572	19502	17510	17860	13840	10718	11798	9498	11324	10536	9556	12186	13654	8830	7140	18824	17962	18898	18014	19086	23936	18868	16838	17080	19396	22696	17680	550416	8891.33	1503.97	17502.7	1551.61	12506.3	2986.24	10317	2347.78	19453.3	2246.31	18759.7	2172.15
K00123	18246	14960	15038	15718	13404	16132	16720	18004	15596	16372	17370	16458	20324	15328	12828	17034	15614	14114	12246	9548	11614	11950	12688	11216	14970	14030	14698	13944	14808	18168	15952	15238	15336	16612	16796	15462	544536	16081.3	1875.06	16197.1	1294.66	15873.7	2603.44	11543.7	1101.17	15103	1559.33	15899.3	672.405
K07714	12290	10008	10612	15246	13370	16944	18444	20084	19436	19906	21886	18092	13980	13556	12384	11634	12900	13078	13978	11740	12286	7398	10828	7994	20338	18276	17712	33544	21068	36114	10124	9658	9112	10414	9632	10262	544328	10970	1182.37	18156.4	2628.23	12922	836.006	10704	2552.81	24508.7	8131.35	9867	487.896
K03183	11592	8802	8892	17388	14996	18360	18846	21264	18174	19978	20656	18570	17582	13766	10898	12510	11018	12112	10836	9506	12160	12718	8952	7952	18778	17240	18184	18622	17194	23656	15168	14042	14052	15512	16662	14526	541164	9762	1585.47	18692.4	1867.63	12981	2488.16	10354	1872.79	18945.7	2403.24	14993.7	1009.31
K02274	16406	12564	12784	18646	16436	17442	17410	20348	15320	18888	18852	18200	20598	14896	13090	14424	13272	13112	10064	8664	10446	12778	13486	12986	13756	12986	14278	10620	13732	14968	16236	15334	15362	16812	18436	15462	539094	13918	2157.48	17949.1	1489.53	14898.7	2891.96	11404	1946.6	13390	1507.69	16273.7	1211.6
K02470	14026	10852	11320	14418	12692	14292	13884	16212	13718	14976	15348	15396	18310	13698	11984	13842	13468	12862	10822	9310	11396	13810	11550	9300	15666	14834	15564	15834	16612	20456	20084	17824	18514	21380	23596	18418	536268	12066	1713.46	14548.4	1058.78	14027.3	2205.91	11031.3	1680.91	16494.3	2022.53	19969.3	2203.77
K01426	10378	7654	8098	15886	13872	16424	15892	18284	13892	16566	16594	16010	16874	12968	10534	11422	10174	10572	11038	9896	12890	14376	10652	9010	19288	17924	18852	17320	19148	22240	18604	17000	17036	19278	21006	16482	534134	8710	1461.49	15935.6	1370.63	12090.7	2549.52	11310.3	1984.6	19128.7	1703.24	18234.3	1728.48
K00058	14236	11000	11398	16186	14148	17302	16944	19160	16258	17200	18442	16878	19048	14234	11856	14126	14072	12924	11038	9506	11382	12550	9494	8534	16668	15984	16458	16978	16168	21738	15340	14276	14320	15470	16296	14924	532536	12211.3	1764.67	16946.4	1423.7	14376.7	2468.25	10417.3	1489.57	17332.3	2187	15104.3	767.223
K02945	13788	10874	11372	13702	12312	14722	14876	16104	15198	14806	16192	15048	19944	15212	12924	15430	15060	13510	11474	9798	11764	12240	10712	9112	17718	16350	16464	17988	16844	22602	15722	15048	14658	16606	18038	15678	529890	12011.3	1558.66	14773.3	1186.34	15346.7	2469.23	10850	1208.57	17994.3	2352.7	15958.3	1216.43
K00986	7912	9704	6992	14820	12762	14866	15808	17350	16992	13192	14690	13774	11864	11278	9786	9508	9570	8944	14834	13002	14616	16562	12416	13132	24926	25094	25232	21376	19770	25820	13346	12606	12318	13608	14054	14090	526614	8202.67	1379.17	14917.1	1581.48	10158.3	1144.14	14093.7	1539.14	23703	2495.34	13337	738.558
K00342	15244	12152	12180	14604	13106	14848	14808	16792	14734	15992	16688	15950	21182	15754	13356	15622	14086	13402	10100	8700	10544	11514	10386	8866	16084	15662	16670	14618	14798	18090	16326	15322	15150	17302	19012	15808	525452	13192	1777.14	15280.2	1178.73	15567	2943.99	10018.3	1069.68	15987	1287.79	16486.7	1460.93
K06894	9678	10264	8766	16298	14320	18314	17792	19690	18970	18318	19296	18130	21540	19060	14784	17510	17096	16096	9208	8714	10688	7696	7200	5558	16216	14130	14496	20982	16214	23510	11744	11128	11238	12642	12658	12438	522382	9569.33	754.889	17903.1	1661.75	17681	2369.38	8177.33	1772.09	17591.3	3791.51	11974.7	698.525
K18138	15546	12022	11798	14110	12184	15120	14840	16632	14286	14508	15152	14656	18940	13596	12080	13394	14802	11318	10262	8436	10056	8864	10322	7978	19066	18948	19192	17584	18164	21288	16210	15038	15376	16026	18526	15634	521954	13122	2102.23	14609.8	1169.84	14021.7	2700.15	9319.67	1022.1	19040.3	1262.78	16135	1246.18
K22579	10040	9872	8230	12536	11468	14788	14844	14990	16534	14110	15174	13452	19192	15832	12392	13040	11256	11704	11446	10306	12776	10898	7354	6000	20786	19388	20030	19366	18758	25352	17190	15728	15478	17422	17288	15606	520626	9380.67	1000.04	14210.7	1523.98	13902.7	3051.71	9796.67	2586.52	20613.3	2421.76	16452	935.201
K00627	11896	9294	9118	12990	11756	14602	14592	16450	14860	15258	16160	14850	19046	15088	12544	13908	13264	11210	9454	8824	10556	12848	8546	7526	17162	16194	17184	16068	16766	21362	18112	16468	16596	18894	21830	17134	518410	10102.7	1555.56	14613.1	1461.94	14176.7	2717.09	9625.67	1870.58	17456	1970.41	18172.3	2018.45
K03307	14694	10482	11350	15078	12480	14656	15660	18666	14758	17436	18444	16320	17654	13194	10692	15598	20086	13078	9896	8608	10560	12288	11168	10280	17346	15794	16166	24922	21678	26168	10844	9962	10340	10294	10912	10514	518066	12175.3	2223.99	15944.2	1997.57	15050.3	3428.36	10466.7	1235.56	20345.7	4556.38	10477.7	358.542
K01872	12792	10584	10708	13786	12064	14578	13936	15914	13654	14620	15546	14876	17502	13582	11716	14102	14732	12412	11028	9452	11852	12758	10874	9458	17040	15892	16472	18004	16742	21506	16874	15192	15258	16958	18912	15864	517240	11361.3	1240.54	14330.4	1144.24	14007.7	2035.83	10903.7	1307.79	17609.3	2032.68	16509.7	1401.77
K01256	12304	9470	10038	11142	9722	12306	12180	13818	13136	12634	13300	13090	14312	11072	9926	12878	14490	11820	11436	9832	11370	12508	9966	8344	19516	19546	19752	20162	20178	23770	19286	17496	17688	19682	21078	17408	516656	10604	1499.39	12369.8	1259.79	12416.3	1815.01	10576	1483.92	20487.3	1633.88	18773	1488.2
K00174	16134	12236	13070	12532	11120	13926	14354	15374	14566	15442	16494	14362	18362	14666	11804	14482	14598	12178	11914	9432	12162	11016	9568	9238	16682	15524	16138	19546	17384	22546	15040	13940	14520	15226	15576	14262	515414	13813.3	2052.56	14241.1	1608.4	14348.3	2344.13	10555	1312.37	17970	2636.86	14760.7	622.802
K11717	14102	10530	11038	13364	11262	13488	13798	15174	12928	14080	14948	13870	19120	13988	11960	14634	14632	12080	10272	9132	11106	13518	10752	9284	17188	15952	16350	19450	18380	22762	16154	14582	14680	16594	17220	15298	513670	11890	1932.41	13656.9	1150.76	14402.3	2603.56	10677.3	1597.03	18347	2521	15754.7	1072.36
K07755	13846	10540	11048	14990	13142	15936	16598	18458	15942	17628	18562	16502	16466	12758	10444	11178	10272	10338	10278	8960	11064	11836	8550	7144	17580	16802	16848	15956	15650	21258	14838	14330	13714	15634	15750	14090	504930	11811.3	1780.29	16417.6	1713.63	11909.3	2421.38	9638.67	1739.99	17349	2035.23	14726	833.191
K00335	14432	11660	11704	11526	10340	12542	13146	13758	13842	13066	14950	13542	18072	14482	12238	13226	13106	11550	10800	9512	11388	10844	8804	7062	17110	16562	16682	19468	16762	22758	16634	15086	15238	17632	18148	15960	503632	12598.7	1587.87	12968	1362.64	13779	2324.91	9735	1622.22	18223.7	2474.8	16449.7	1255.68
K21162	14992	9994	12102	15866	13060	15482	16194	19504	14436	17918	17884	16270	19520	14496	11566	12968	13558	11202	9438	8678	10566	12486	9996	9438	16744	15936	17282	16366	17846	20402	12414	11230	11422	11518	11600	11796	502170	12362.7	2509.18	16290.4	1944.01	13885	3021.61	10100.3	1328.12	17429.3	1603.9	11663.3	412.857
K01996	12418	9434	10106	18166	16312	19630	20098	22102	19612	22038	22104	20192	16840	12940	9676	10430	8990	11328	9986	7874	9678	9032	8862	6866	15560	14594	15098	17168	14066	22710	11290	10734	10256	11824	12218	10966	501198	10652.7	1565.31	20028.2	1945.84	11700.7	2868.77	8716.33	1165.42	16532.7	3206.57	11214.7	720.494
K03286	13046	9972	10574	10620	9368	12604	12980	14578	13170	11872	12778	12232	16570	12622	11394	14332	17726	11800	12554	10054	11538	12574	10386	8574	19160	17218	17600	25006	20518	26882	12524	11700	12178	13036	16112	12898	498750	11197.3	1629.04	12244.7	1512.81	14074	2611.34	10946.7	1569.85	21064	4002.57	13074.7	1565.57
K03496	10238	9206	8630	12690	11634	13450	13452	15142	13902	13274	14062	13892	16706	12398	10664	12190	12826	11150	10478	9008	10988	15376	9458	8668	16846	15848	15762	15542	15466	20698	17670	16424	16506	18504	21206	17188	497142	9358	814.705	13499.8	969.614	12655.7	2142.49	10662.7	2470.76	16693.7	2023.59	17916.3	1787.43
K01133	9514	8854	7634	16036	13084	15626	15808	18496	14340	17364	18516	15410	17990	14264	11550	13450	13412	11434	9476	8836	11412	10552	10134	8220	18616	16608	17630	21608	19624	26634	10888	9942	9846	10918	11810	10468	496004	8667.33	953.799	16075.6	1808.11	13683.3	2392.62	9771.67	1166.32	20120	3624.6	10645.3	728.662
K01649	10962	9340	9144	14290	12524	15176	14572	16456	14108	15400	16450	15440	16564	12626	10598	12054	10214	11492	10740	9272	11494	13126	10428	8964	14998	14524	15386	14284	15736	18972	16596	15126	15844	18148	18630	15618	495296	9815.33	997.866	14935.1	1234.03	12258	2290.81	10670.7	1525.73	15650	1712.99	16660.3	1428.56
K02483	9980	8552	8794	14704	12984	16010	16000	17228	15542	16050	15828	15532	16296	12668	10788	13114	12532	12184	10118	8622	9952	12100	9468	7664	17584	16296	16928	18924	16984	24278	13628	12738	12180	14176	15410	13260	495096	9108.67	764.236	15542	1164.95	12930.3	1829.51	9654	1506.44	18499	2967.53	13565.3	1138.11
K07713	9780	7840	8198	11900	10280	13062	13846	14906	15198	14022	15870	13390	11784	11718	10796	9816	11512	9880	13168	10380	11644	8668	10512	7498	22374	20158	20426	32456	23478	36804	10774	10070	10250	10638	10380	10542	494018	8606	1032.35	13608.2	1728.3	10917.7	899.947	10311.7	2029.63	25949.3	6972.77	10442.3	259.897
K03520	10088	7944	7476	25190	21974	24004	24252	27692	20396	26784	26178	24314	18954	14338	11510	10504	6668	12102	7434	6288	8092	11340	9372	8410	11074	11510	11792	8232	12152	11740	9290	8818	8656	9490	10460	8916	493434	8502.67	1392.74	24531.6	2298.2	12346	4099.39	8489.33	1733.73	11083.3	1441.37	9271.67	659.014
K07487	9510	9250	8140	18244	15532	18576	19898	23004	19080	19234	20388	18874	14766	11386	8372	8656	7920	8512	11754	10928	12364	10030	11166	9764	16780	16724	16522	13766	14318	17752	11684	10946	11044	11380	11800	11594	489658	8966.67	727.622	19203.3	1976.37	9935.33	2668.63	11001	993.01	15977	1567.88	11408	349.617
K00001	12610	9800	9908	12944	11412	14176	14772	15770	14706	14424	14944	14056	17202	13520	10984	11682	10418	10884	10620	8846	11286	12334	8940	8358	17754	16710	17488	15194	15664	20432	15372	14144	13890	15670	17116	14658	488688	10772.7	1592.09	14133.8	1273.98	12448.3	2570.87	10064	1588.25	17207	1868.63	15141.7	1185.42
K03574	9366	8162	7700	11438	9992	12796	12510	14216	12956	13062	13552	12914	16828	13378	11060	13054	12404	11204	9880	9078	10912	12428	8020	6226	17750	16970	17606	17072	16808	22024	17970	16066	16274	18758	21400	16718	488552	8409.33	860.098	12604	1232.62	12988	2104.42	9424	2180.1	18038.3	1987.18	17864.3	2019.31
K03688	8614	7750	7052	12306	10672	13356	12984	14442	13678	11908	12860	12522	15692	12460	10326	11190	10762	10090	11904	10410	13264	13170	9754	7892	20908	20376	20368	17444	18830	23850	14884	13806	13362	15728	17966	14378	486958	7805.33	782.469	12747.6	1085.95	11753.3	2103.17	11065.7	2106.48	20296	2158.71	15020.7	1663.35
K00784	12520	9796	9790	12600	11076	13720	13692	15892	14270	13876	14826	13454	13818	10932	9186	10106	9314	9342	11400	10236	12386	11596	8630	6654	19688	18074	19200	19206	17460	22928	15046	14392	14196	15464	16236	14684	485686	10702	1574.44	13711.8	1350.17	10449.7	1778.2	10150.3	2153.74	19426	1903.95	15003	756.438
K12960	12482	9046	9976	14830	13318	15884	16108	17540	15352	16360	17222	15100	16796	13936	10918	12912	12124	10862	11964	10102	12720	11516	9964	9270	16574	15676	16030	16690	15420	20184	10480	10290	10016	10780	11222	10624	480288	10501.3	1777.22	15746	1286.03	12924.7	2233.05	10922.7	1340.95	16762.3	1747.39	10568.7	416.059
K00655	12932	9512	10138	10872	9784	12196	12266	13402	12840	12794	13626	12516	15404	11784	10294	12598	12548	10884	10086	8868	11436	13540	8246	6802	16726	15590	16122	17310	16996	21134	16764	14976	15388	17342	19378	15222	478316	10860.7	1820.93	12255.1	1220.57	12252	1792.58	9829.67	2408.82	17313	1971.41	16511.7	1688.38
K03529	10630	8936	8906	12430	10604	13460	13098	14466	12586	13024	13808	13058	15230	12162	10516	12710	12914	11294	10564	8930	10844	11804	10298	8612	16024	15526	15558	16226	16154	20200	16396	14472	14802	17094	19122	15442	477900	9490.67	986.806	12948.2	1074.72	12471	1622.85	10175.3	1205.04	16614.7	1781.49	16221.3	1725.57
K02433	11740	9186	9050	16472	14558	16828	17030	19272	15280	18632	19174	16838	16430	12926	10388	11930	10584	11072	9588	8194	10588	11546	10096	8590	13132	13046	13394	12726	14100	16512	13422	12166	12582	13620	14618	12480	477790	9992	1515.34	17120.4	1646.15	12221.7	2265.27	9767	1252.1	13818.3	1398.28	13148	915.387
K01190	8900	8622	7700	9758	8778	12132	12284	13492	14502	11838	12186	13876	16682	11266	9902	14630	18446	10350	7658	7346	9218	10770	6258	4922	21648	20154	20630	30714	25194	31820	11434	10600	10532	10948	11486	10938	477614	8407.33	628.141	12094	1853.8	13546	3569.62	7695.33	2081	25026.7	5157.75	10989.7	402.364
K02480	10778	8258	9132	13444	12266	15986	16354	16552	18254	15526	17206	15986	18462	14640	10896	12414	10842	11534	8314	7586	9730	9668	6116	5198	16520	16006	15674	12524	12500	17090	15404	14692	14202	16148	16690	14788	477380	9389.33	1279.56	15730.4	1837.53	13131.3	2966.34	7768.67	1850.66	15052.3	2025.29	15320.7	948.353
K24012	11232	9618	9082	11806	10240	12824	13580	14558	14240	14146	14890	13840	15514	12420	10390	11876	12156	9936	9844	8502	11094	9042	8422	6682	17840	16614	17512	20630	17322	23998	14512	13692	13736	14770	15318	13952	475830	9977.33	1119.14	13347.1	1495.08	12048.7	1969.89	8931	1484.96	18986	2817.95	14330	648.943
K07027	7798	6128	6084	11726	10288	13088	12866	13938	12834	13056	13032	12484	16002	12736	9954	11510	11194	9868	9446	8822	11796	12658	7320	5868	18732	17796	18596	17172	17946	22514	17166	16084	15596	17684	18706	15810	474298	6670	977.124	12590.2	1041.05	11877.3	2284.24	9318.33	2586.62	18792.7	1909.32	16841	1223.15
K00820	11174	9300	9454	13228	11338	13728	13540	14828	13450	13960	15398	13856	17262	13488	11194	13232	13954	11830	9190	8062	10246	11106	8960	7706	15292	14492	14636	16418	15102	20536	14934	13248	13622	15514	17070	13906	474254	9976	1040.35	13702.9	1125.73	13493.3	2123.06	9211.67	1289.26	16079.3	2287.12	14715.7	1430.64
K14162	11828	9554	9328	12886	11274	13172	12860	14560	11778	13760	14024	13250	15864	12600	11034	11428	10258	10298	9684	8676	10778	12454	10598	9162	14518	14046	14534	14130	15866	18906	17178	15564	15656	17626	18220	15672	473024	10236.7	1382.76	13062.7	1038.12	11913.7	2118.37	10225.3	1359.08	15333.3	1868.51	16652.7	1167.92
K01951	12272	9936	10058	12948	11028	12860	12808	14414	12420	13874	14172	13222	15680	12188	9754	12144	12322	10888	10118	8496	10266	11560	9950	9270	15118	14274	14414	15438	15230	18892	15622	14132	14654	16752	19066	14910	471150	10755.3	1314.89	13082.9	1025.22	12162.7	1991.2	9943.33	1029.22	15561	1696.38	15856	1815.13
K05802	12408	9472	9684	10968	9494	11766	12058	14242	11874	12462	13144	12586	15346	10754	9230	10620	12178	8496	11792	9644	11632	11940	10876	8736	18840	18550	18632	16076	17566	21284	15116	14224	13938	14822	14376	14178	469004	10521.3	1637.34	12066	1335.66	11104	2442.06	10770	1309.4	18491.3	1710.78	14442.3	441.422
K03782	12404	9868	10450	10758	10216	12404	12106	13356	11522	12058	12978	12238	15222	12050	10134	12148	11754	10966	12498	10270	12186	13930	11586	10764	14848	14272	14968	15152	16128	18720	15628	13912	14474	15506	16464	14312	468250	10907.3	1328.42	11959.6	998.039	12045.7	1732.33	11872.3	1311.62	15681.3	1606.41	15049.3	970.863
K03281	7700	7084	6370	12372	10998	13642	14082	15412	15068	14618	15334	15078	13322	10752	8758	10274	9744	9642	10402	9670	11042	10906	8498	6204	19132	18562	18536	20498	17874	24870	13436	12054	12116	13834	14330	12528	464742	7051.33	665.601	14067.1	1508.92	10415.3	1573.37	9453.67	1846.72	19912	2584.68	13049.7	952.776
K03168	11750	9002	9306	11966	10966	12670	12034	13836	11726	12726	13622	12724	16234	12228	10612	13552	13632	12234	10250	8540	10376	12292	10002	8520	14234	14012	13694	14870	15256	18006	15420	13882	14236	16258	17590	14440	462698	10019.3	1506.49	12474.4	909.849	13082	1897.78	9996.67	1398.5	15012	1573.92	15304.3	1418.35
K14083	14140	12420	11756	11404	10868	13590	13664	13828	15806	11948	13606	12570	15632	14564	10440	11814	9092	11676	13174	10918	13400	7742	9868	8628	14336	12794	13936	18314	12532	21950	12176	11986	11298	13472	13898	12490	461730	12772	1230.36	13031.6	1503.78	12203	2471.76	10621.7	2330.52	15643.7	3723.7	12553.3	969.144
K00010	11710	9946	9112	13916	11730	13552	14566	16896	14228	15808	17054	15052	20302	15142	12712	13776	13982	11564	7752	7752	9858	10298	6642	5582	13992	13164	13900	16078	15134	19036	12250	10932	11298	11670	12600	12244	461230	10256	1326.45	14755.8	1683.8	14579.7	3054.4	7980.67	1819.04	15217.3	2134.61	11832.3	641.201
K03585	13042	10512	10262	11368	9834	12010	12558	15030	12672	12884	14002	12668	14626	11154	10002	11416	13514	9414	9988	8172	9954	10684	9584	8074	18710	17992	18194	20960	18528	23968	11486	10930	11150	10994	12534	11836	460706	11272	1537.95	12558.4	1477.49	11687.7	2016.88	9409.33	1058.39	19725.3	2338.31	11488.3	613.982
K01139	12212	9718	9860	11420	10646	11892	11992	13384	12300	12384	13162	12766	16258	12206	10546	12582	12980	10442	9942	8530	10508	11792	9120	8158	15930	15088	15432	15556	15596	19712	14724	13440	13540	15092	16280	13512	458702	10596.7	1400.72	12216.2	855.175	12502.3	2121.3	9675	1354.05	16219	1732.67	14431.3	1145.61
K00721	9928	7380	8018	13656	11538	14050	14274	15950	13994	14598	15626	14426	16444	12926	10024	12736	13326	10694	8100	7078	8810	9328	6894	6130	16962	16474	16882	17590	15480	22042	13024	11944	11780	13376	13388	12274	457144	8442	1325.86	14234.7	1262.3	12691.7	2264.79	7723.33	1228.06	17571.7	2298.33	12631	721.961
K01214	8028	7366	6340	11330	9900	12038	11560	13864	11610	12056	11902	12540	14268	11068	9306	9474	8266	8922	8892	8478	10416	12890	8026	6308	15880	16050	16372	12916	15336	17400	20228	17992	18688	21184	21954	18130	456978	7244.67	850.516	11866.7	1050.29	10217.3	2190.9	9168.33	2255.96	15659	1507.95	19696	1671.39
K17713	9066	7760	6980	16818	12660	14704	15418	19876	13972	16666	17324	14738	19122	13668	10510	11810	11898	10248	7570	7010	9564	9894	9212	7984	15318	14776	15258	17992	17460	21172	10106	8808	9194	9648	10962	10338	455504	7935.33	1053.99	15797.3	2133.04	12876	3293.54	8539	1176.81	16996	2425.33	9842.67	786.995
K04034	9374	7606	8340	12208	11128	13862	14790	15780	15884	14482	16318	13180	14396	12992	10120	10758	11534	10414	12718	10880	11748	7450	7696	6320	16762	14366	14350	24750	16030	26426	9814	9490	8870	10536	10338	9916	451626	8440	888.232	14181.3	1760.77	11702.3	1673.49	9468.67	2641.09	18780.7	5382.29	9827.33	600.218
K00266	12448	9882	9934	10130	9348	10956	11272	11708	11574	12400	12884	11970	14556	10958	9230	10870	10368	8750	8712	7282	9408	10232	7938	6584	16756	16596	17214	16186	15670	19574	17122	15862	15946	17512	18280	15360	451472	10754.7	1466.7	11360.2	1099.73	10788.7	2048.93	8359.33	1358.01	16999.3	1365.69	16680.3	1131.18
K15987	11936	10354	9558	12028	10592	12126	11962	13780	11650	13282	13606	13072	16840	13202	10970	12670	13186	11314	8648	7158	9180	9938	8534	7742	13998	13264	13486	14666	13940	17230	15414	14062	13814	16014	16442	14090	449748	10616	1210.46	12455.3	1048.66	13030.3	2092.27	8533.33	992.186	14430.7	1454.17	14972.7	1130.4
K03641	12666	9702	9866	12464	11148	13234	14100	15328	13406	15276	16338	14012	16982	13872	10456	14148	13882	12274	8356	7674	9552	8390	7574	6294	15180	13868	14224	16480	14226	19512	11314	10884	10916	11632	12244	11254	448728	10744.7	1665.94	13922.9	1590.89	13602.3	2169.55	7973.33	1084.57	15581.7	2146.33	11374	508.198
K00962	11968	9746	9928	11976	10410	12642	11980	13720	12148	12602	13474	12754	15854	12024	10754	12448	12412	11154	9792	8306	9652	11720	9980	8598	13242	12306	12976	13546	14002	17108	14716	13544	13992	15452	16722	13884	447532	10547.3	1233.69	12411.8	968.187	12441	1806.97	9674.67	1210.24	13863.3	1687.99	14718.3	1196.3
K06048	9430	7788	6798	12680	10690	12748	12252	14652	11780	13124	13118	13138	15256	10416	9190	9950	8804	8174	9292	8182	9822	13492	9500	8046	16520	16306	17156	13146	16280	17948	15696	14422	14312	15954	16658	14300	447020	8005.33	1329.39	12686.9	1086.57	10298.3	2556.87	9722.33	1981.8	16226	1637.82	15223.7	1013.98
K02111	11438	9510	9370	11698	10094	11568	11736	13208	10974	12062	12208	12158	16068	12064	10908	11854	12432	10744	10592	8706	9990	12088	11334	9758	13230	12938	13580	12942	14572	16964	14752	13670	13460	15062	16532	13716	443980	10106	1155.67	11745.1	864.556	12345	1939.92	10411.3	1200.64	14037.7	1556.95	14532	1173.66
K02519	11334	9268	9360	10800	9444	11504	11360	12992	11382	11940	12674	12252	14906	11366	10096	11276	11788	10224	9776	8390	9484	11366	9288	7762	13470	12940	13322	14202	14752	17800	14660	13534	13974	14780	17360	13704	434530	9987.33	1167.15	11594.2	1062.67	11609.3	1748.12	9344.33	1241.83	14414.3	1782.16	14668.7	1411.12
K03724	7260	5694	5698	12668	10978	12164	12106	14636	10302	13298	12998	12386	12794	10426	8634	8998	7526	8928	9424	8096	10534	12014	9528	8804	15116	14510	15502	13306	15684	18000	16948	14878	14672	17156	17706	14754	434126	6217.33	902.978	12392.9	1264.96	9551	1839.46	9733.33	1380.21	15353	1555.34	16019	1394.15
K00799	12404	8296	8576	17326	14932	16600	16450	20486	13396	17108	16838	15894	15870	11118	9216	11124	10174	9660	8808	7586	8806	12596	10602	9366	10426	10376	10778	8194	11860	12434	10904	9744	10128	11144	13882	10526	433628	9758.67	2295.2	16558.9	1920.17	11193.7	2415.85	9627.33	1751.81	10678	1470.76	11054.7	1475.16
K06158	10486	9224	8634	10952	9920	12336	12008	12602	12632	11880	12270	12030	16434	12708	11014	13236	14430	11178	8338	7424	9128	10360	7508	5932	14592	14092	14210	14524	14178	17776	12828	11966	12104	13654	17360	13002	432950	9448	946.101	11847.8	878.859	13166.7	2053.07	8115	1531.49	14895.3	1425.32	13485.7	1996.18
K00239	11000	9200	8786	12298	10716	12600	12140	13518	11614	12662	13304	12884	14822	11556	9986	10956	10242	10178	9616	7936	9644	10154	8910	8620	13470	12992	13404	13930	13894	16926	13534	12578	12944	14578	15322	13076	429990	9662	1177.09	12415.1	861.658	11290	1827.16	9146.67	810.116	14102.7	1425.94	13672	1062.49
K02484	9418	8024	7658	11984	10948	13596	13444	14322	13520	13498	14088	14006	14496	10722	8776	10704	8570	10612	7386	6494	8182	10770	7126	6586	14814	14980	15698	13826	13752	17740	13966	12484	12984	14578	16662	12690	429104	8366.67	928.69	13267.3	1096.24	10646.7	2127.88	7757.33	1597.56	15135	1473.51	13894	1574.84
K01921	10884	8732	8788	11938	10344	12536	13488	14686	12932	14058	14788	12984	14394	11536	10100	12054	12892	10324	8230	7084	8482	9702	7858	6896	13418	12028	12272	15624	13046	18288	12902	12126	11900	13632	14778	12586	428310	9468	1226.61	13083.8	1402.51	11883.3	1617.56	8042	1024.64	14112.7	2411.3	12987.3	1069.08
K00574	9820	7710	7864	13562	11800	13556	14184	16396	13208	14828	15594	13880	13488	9752	8328	9332	9098	8680	9228	7272	9230	9996	9362	7840	15816	14954	15816	13472	15018	18598	11946	11084	10960	11608	13262	11270	427812	8464.67	1176.28	14112	1358.25	9779.67	1883.3	8821.33	1036.15	15612.3	1694.98	11688.3	850.878
K03498	10354	7988	8096	10800	9578	11320	11538	12494	11868	11750	12362	11536	15098	11430	9800	12010	12654	10064	9644	7792	9056	11188	9576	7418	15198	14726	14882	16442	16036	18980	12958	11944	11882	12784	14046	11950	427242	8812.67	1335.93	11471.8	876.146	11842.7	1938.55	9112.33	1372.83	16044	1586.29	12594	851.009
K01647	11860	8890	9642	12588	11004	12556	12766	14496	12030	13446	14144	13366	14164	10508	9440	10706	10340	9806	8294	7014	8282	10386	9064	7650	14134	13136	13580	13534	13994	16954	13172	12184	12210	13764	14978	12582	426664	10130.7	1544.12	12932.9	1071.54	10827.3	1700.31	8448.33	1173.01	14222	1384.81	13148.3	1082.44
K00700	9256	7250	7368	10834	9338	11688	11744	12788	11420	11858	12092	12134	14026	10568	9362	9928	9968	9364	9326	8290	10014	12038	8572	6882	15792	15510	15616	14376	15402	17932	14166	13126	13566	15020	15018	13284	424916	7958	1125.65	11544	983.691	10536	1767.78	9187	1750.85	15771.3	1170.02	14030	844.247
K03294	11682	8710	9198	12494	10584	12306	12782	14900	12438	13754	14356	13418	13622	10984	8568	10688	9966	9794	7534	6274	8050	8372	7784	6826	13216	11762	11890	18118	13902	19710	13362	12124	12536	13668	14282	12352	422006	9863.33	1593.8	13003.6	1281.11	10603.7	1701.07	7473.33	787.119	14766.3	3350.33	13054	849.22
K07481	6548	6452	5988	10846	9162	11434	12306	13928	13208	10996	12104	12174	8858	7444	5816	7114	7250	5912	12598	11362	12574	11916	10894	8986	20636	20208	21144	19588	16762	22772	10828	10348	10542	11202	11118	10958	421976	6329.33	299.475	11795.3	1398.59	7065.67	1121.12	11388.3	1353.79	20185	1994.47	10832.7	332.548
K09458	9860	8008	7970	12822	11720	13962	14204	16114	14154	15014	16192	14588	15582	12756	9826	11392	11750	10258	9242	8006	9276	9376	7228	6300	13578	12518	12574	14110	13186	17468	10048	9290	9364	10444	10700	10040	418920	8612.67	1080.39	14307.8	1433.88	11927.3	2076.71	8238	1281.43	13905.7	1846.95	9981	565.238
K01126	8918	6658	6946	10238	8564	10820	10634	12684	10716	10590	10774	10874	14978	11346	9302	10636	9682	8426	9342	7882	10012	11346	7836	6350	16422	15604	16638	14894	15484	19242	13846	13086	12616	15190	15932	13204	417712	7507.33	1230.13	10654.9	1046.47	10728.3	2318.61	8794.67	1789.93	16380.7	1540.94	13979	1308
K03442	7950	6310	6398	10156	8620	11064	10610	12058	11506	9264	10278	9666	12788	10000	8306	10638	11074	8612	10568	8928	10210	13310	9484	8060	19324	18154	18548	18128	18362	22524	10524	9814	10066	10558	11890	10752	414502	6886	922.501	10358	1090.49	10236.3	1661	10093.3	1813.81	19173.3	1698.87	10600.7	720.79
K03702	10646	8426	8746	11504	10598	11922	11642	13808	11044	12564	12772	12262	14650	11228	9852	11468	11716	10542	8574	7320	8834	10120	9112	8732	11512	10684	11948	12250	12296	15394	13666	12828	12774	14320	15520	13048	414322	9272.67	1200.06	12012.9	968.884	11576	1651.86	8782	903.887	12347.3	1607.37	13692.7	1071.5
K03750	10852	8346	8196	10564	9290	11780	12056	12596	12490	11934	12832	11950	14470	11538	9092	11048	11070	9400	9310	7646	9568	9914	7266	5370	13742	13680	13668	12866	12326	16610	13736	12776	12720	14426	15522	13042	413692	9131.33	1492.03	11721.3	1121.01	11103	1922.2	8179	1745.1	13815.3	1481.55	13703.7	1104.09
K01710	11246	8334	9048	9838	8632	10462	11362	12438	11260	12226	12836	11950	14562	10722	8822	11216	12020	9204	8292	7446	9118	10150	6812	5888	14956	13600	13590	15520	14282	18850	13140	11406	11938	13318	14750	12102	411336	9542.67	1517.71	11222.7	1362.16	11091	2086.71	7951	1557.05	15133	1972.43	12775.7	1212.96
K00031	11872	9658	10024	9980	8912	10732	10658	11564	10668	10898	11004	11076	16284	11978	10516	12728	12594	10418	8592	7294	8840	11712	9224	8412	11304	10932	11370	11750	12922	14186	13770	12396	13074	14346	16070	13090	410848	10518	1186.79	10610.2	763.717	12419.7	2139.36	9012.33	1473.26	12077.3	1239.13	13791	1300.29
K06994	4134	4948	3172	14652	12860	14542	13216	15440	12444	15978	15008	16484	10750	7498	6264	7600	4336	8570	5282	5176	7836	8888	4380	3788	10818	11260	11674	8434	11828	12892	20638	18124	18230	21464	24374	17190	410172	4084.67	889.027	14513.8	1407.61	7503	2156.66	5891.67	2017.57	11151	1501.19	20003.3	2691.86
K11618	7564	6996	6586	11950	10540	14284	13984	13514	16116	12738	14268	13138	17694	14800	11004	12254	10068	11050	7356	7214	9212	7812	4648	3674	14070	13308	13480	10768	10220	15266	12390	11502	11372	13288	13556	12384	410068	7048.67	491.123	13392.4	1583.27	12811.7	2898.29	6652.67	2078.23	12852	1958.76	12415.3	892.974
K02112	11142	9196	9082	10728	9790	11118	10748	12422	9904	11172	11946	11768	15064	10924	10100	10806	10760	10130	9114	7730	8770	10872	10196	8858	12242	11816	12048	11844	12358	14878	13358	12326	12666	14460	16208	12886	409430	9806.67	1157.84	11066.2	888.374	11297.3	1879.02	9256.67	1117	12531	1169.47	13650.7	1455.31
K03655	9720	7684	7760	10566	8870	10888	10622	12004	11182	11118	11552	10890	14832	11762	9458	12374	13026	9608	8056	7170	9170	10114	7224	6120	13724	13280	13288	14668	13450	17392	13280	12208	12396	14074	15266	12332	407128	8388	1154.17	10854.7	870.521	11843.3	2064.25	7975.67	1460.34	14300.3	1600.92	13259.3	1216.67
K13924	6514	8240	5700	13936	11958	14470	13744	17054	12710	13210	13760	13960	15906	13506	11828	12888	12244	12978	7358	6132	7150	11542	8318	8118	10804	10194	10512	11384	10550	14128	10410	9760	10198	11728	13354	10534	406780	6818	1297	13866.9	1413.11	13225	1439.12	8103	1855.87	11262	1459.36	10997.3	1327.95
K01733	10350	7804	8368	11382	9548	11832	11644	12690	11530	12468	13158	11860	13852	11758	9288	10786	10024	9378	9092	7770	9358	9618	8210	6900	13300	12796	13404	14332	13498	17752	12320	11196	11048	12200	12710	11596	404820	8840.67	1337.19	11790.2	1026.51	10847.7	1739.51	8491.33	1050.06	14180.3	1818.76	11845	666.076
K00336	10376	8494	8448	9778	8882	10444	11044	11676	11140	11266	12002	11294	14492	11210	9114	10506	9650	9252	8402	7396	8962	9108	7946	6318	14068	14000	14050	13292	12944	16414	13838	12846	12778	14494	15382	13004	404310	9106	1100.09	10836.2	980.22	10704	2019.48	8022	1049.63	14128	1212.65	13723.7	1052.53
K01890	10018	8384	7972	10494	9222	11218	11680	12402	11534	11560	12390	11488	13414	10486	8978	10874	11608	9616	8720	7402	9136	10400	8432	6960	13218	13078	13098	14008	13374	16876	12434	11778	12016	13140	14452	12234	404094	8791.33	1082.11	11332	979.147	10829.3	1568.84	8508.33	1236.47	13942	1477.72	12675.7	986.449
K07058	7832	6368	6324	10724	9442	11376	11020	12512	10718	11202	12066	11680	12914	9886	8044	9118	7946	8482	8366	7816	9274	11220	7208	5568	14866	14206	15036	13416	14364	17526	14858	13458	13672	15178	16596	13620	403902	6841.33	858.225	11193.3	888.408	9398.33	1868.66	8242	1915.71	14902.3	1406.18	14563.7	1224.95
K03696	8628	7668	7524	10518	9258	10754	10766	12040	10860	11822	12424	11606	15006	11714	9620	11418	11248	10280	8234	7412	8892	10082	8002	6988	11326	10920	11072	12450	11798	15296	14796	13130	13628	15706	17274	13254	403414	7940	600.16	11116.4	963.848	11547.7	1866.4	8268.33	1106.62	12143.7	1641.03	14631.3	1632.39
K01868	10814	8254	8910	11380	9726	11392	11298	12922	11012	11522	12218	11758	14614	10936	9556	10786	11032	9454	8306	7294	8574	10120	8648	7486	12456	11624	11824	13248	12596	15524	13350	11620	12274	13508	15042	12280	403358	9326	1329.73	11469.8	869.52	11063	1874.21	8404.67	1011.68	12878.7	1419.81	13012.3	1224.69
K05568	6796	5720	5596	9400	7572	8968	9084	10422	9276	9618	10272	9158	13960	10888	9614	10948	11806	8398	10770	9266	10892	12514	9638	8626	16806	16276	17086	16104	16178	18942	11962	11110	10890	11702	11442	11302	399002	6037.33	659.943	9307.78	827.485	10935.7	1902.26	10284.3	1398.67	16898.7	1073.08	11401.3	390.539
K00937	9058	7064	7498	10256	9162	11112	10532	12024	10852	11018	11086	11264	15050	10492	9026	10912	11094	8754	7906	6794	8566	11148	8268	7282	13576	12990	12932	11740	13308	15762	13408	12304	12250	14222	16772	12636	398118	7873.33	1048.65	10811.8	789.968	10888	2260.22	8327.33	1525.65	13384.7	1323.62	13598.7	1727.24
K06888	9430	7022	7612	12140	9922	12014	11640	13438	11188	12390	13434	11956	12252	9958	8272	9098	9294	8620	9010	7580	9290	9770	8286	6788	14834	13658	14974	13392	13364	16686	12018	11050	10980	12166	12282	10948	396756	8021.33	1255.1	12013.6	1084.17	9582.33	1430.32	8454	1123.17	14484.7	1291.55	11574	643.141
K00812	11312	8188	8986	10470	9002	10680	10760	12592	11194	10980	12006	10690	15286	11512	9618	11438	12566	10324	7762	6604	8332	9114	7544	6262	12820	11852	11860	14894	13540	17082	12194	10576	11090	12416	13476	11174	396196	9495.33	1623.09	10930.4	1004.37	11790.7	1994.6	7603	1062.04	13674.7	2022.89	11821	1071
K00135	9948	7156	7490	11816	10356	12368	11464	13146	10992	12306	12330	12126	13810	10402	8606	10000	8642	10010	7316	6092	7746	10662	8108	7228	10742	10660	11268	10544	12000	13696	14444	12714	13286	14876	17082	13006	394438	8198	1524.72	11878.2	834.688	10245	1902.9	7858.67	1532.77	11485	1209.88	14234.7	1630
K01845	10396	9304	8230	10052	8934	10704	10680	11802	11042	11110	12124	11410	14702	11528	9264	10582	10468	9592	7776	6906	8716	8984	6768	6400	11420	11232	11374	10934	11364	14256	14324	13080	13332	15106	16032	13360	393288	9310	1083.01	10873.1	955.295	11022.7	1971.52	7591.67	1077.53	11763.3	1233.89	14205.7	1175.22
K12340	11106	8136	8980	8728	7594	9536	10222	11638	10108	11388	11950	10636	12400	8828	8128	11766	15306	9366	7754	6314	7310	8692	7146	5594	14672	13444	13952	23384	17062	22636	9510	8772	9198	9702	10868	9532	391358	9407.33	1530.42	10200	1420.37	10965.7	2709.88	7135	1085.07	17525	4432.27	9597	704.001
K01874	10154	8618	8376	9582	8460	9898	9992	11788	9948	10488	10940	10604	14082	10466	8828	11484	12008	9706	8344	7114	9062	9736	7828	6550	11850	11706	11976	13384	13172	15800	12582	11506	11302	13008	13892	11862	386096	9049.33	964.291	10188.9	930.181	11095.7	1863.94	8105.67	1192.47	12981.3	1553.09	12358.7	991.25
K00343	10326	8570	8940	10344	9456	11514	11438	12650	11492	12378	12746	11698	14616	11338	9526	10770	9720	9782	7662	6862	8024	8298	7036	6048	12378	12142	12524	11714	11558	14606	11352	10960	10796	12348	13244	11080	385936	9278.67	925.692	11524	1072.28	10958.7	1924.94	7321.67	833.961	12487	1103	11630	963.822
K01465	9946	7484	7998	10590	8778	10806	10776	12672	9970	11472	11664	11338	12958	9868	8424	9896	10940	8356	8228	7112	8538	10308	8054	6580	13166	12324	12812	12868	13540	16262	12322	11324	11316	12298	13478	11292	385758	8476	1298.74	10896.2	1102.88	10073.7	1721.37	8136.67	1293.37	13495.3	1414.03	12005	872.114
K07277	11902	8156	9690	10434	9020	10726	11026	13428	10990	12766	13518	11820	12914	9972	8416	11224	14204	9458	8174	6656	7486	8846	8246	6360	13382	12040	12504	17214	14792	18988	8356	8172	8204	8408	10036	8072	385600	9916	1883.2	11525.3	1494.13	11031.3	2194.76	7628	973.277	14820	2766.38	8541.33	742.513
K00854	7416	6430	5988	8458	7938	10340	11056	11184	12058	10778	11810	10980	14946	12148	8866	9870	9774	8584	8284	7258	9408	9642	4866	4098	14546	13822	14124	15108	13532	18862	12562	11692	11092	12898	13338	11536	385292	6611.33	731.066	10511.3	1413.6	10698	2429.51	7259.33	2326.62	14999	1971.95	12186.3	876.219
K02032	10324	7574	8132	11664	10202	12320	12384	13312	12998	11830	12974	12160	15460	11820	9156	11026	9210	9348	7762	6660	8210	7784	6412	5458	13162	12208	12608	13132	11602	16986	9688	9392	9368	10520	10678	9564	383088	8676.67	1453.66	12204.9	931.28	11003.3	2445.33	7047.67	1047.37	13283	1907.18	9868.33	580.103
K02199	10972	8136	8744	9478	8166	10334	10234	11594	10096	11128	11570	10810	15134	11506	8968	11492	11908	9070	6728	6248	7362	8548	6546	5256	14262	13748	13916	13852	12736	16746	11492	10930	10568	11764	12098	10944	383084	9284	1493.13	10378.9	1087.07	11346.3	2260.39	6781.33	1107.03	14210	1344.23	11299.3	581.106
K00163	9814	7822	7780	9956	8882	10244	9894	11078	9126	10038	10260	10278	13852	10206	8814	9708	9110	8148	7466	6340	8270	10756	8422	8212	11992	11708	12668	10532	12632	14390	14346	13040	13318	14858	15050	12944	381954	8472	1162.4	9972.89	650.798	9973	2029.28	8244.33	1454.24	12320.3	1279.25	13926	940.998
K01271	10318	7440	8180	12264	10890	12334	12842	14264	11946	13368	13648	12326	13482	10160	8186	9384	8528	8240	8618	7326	9082	9964	9208	8656	11492	10596	11058	12792	12238	15346	9810	8786	8896	10120	10340	9360	381488	8646	1494.52	12653.6	1006.25	9663.33	2020.11	8809	874.864	12253.7	1709.4	9552	642.509
K01207	9578	6420	7808	9270	8114	10650	10770	11538	11098	10850	11400	10992	12492	9380	7802	10552	11790	9254	7644	6668	8304	9090	5862	4650	15044	14010	14858	17202	14818	19812	10354	9648	9824	11160	11896	10274	380876	7935.33	1582.85	10520.2	1112.84	10211.7	1744.83	7036.33	1637.26	15957.3	2169.82	10526	852.717
K07004	8236	6822	6390	8386	8062	10032	9618	10402	10664	10022	10408	10000	16824	13810	11330	13444	15910	10714	7054	6486	7960	10344	5566	5252	14368	12974	13026	13402	11564	15886	10462	9966	10114	10740	11994	10396	378628	7149.33	965.551	9732.67	910.634	13672	2418.66	7110.33	1866	13536.7	1462.7	10612	729.491
K01251	10056	8560	8178	10448	9292	10820	10696	12194	10400	11306	11500	11132	13896	10598	9048	9856	9956	8802	7822	6510	8064	8978	8574	7812	11170	10510	10954	11190	11492	14028	12524	11434	11922	12830	13906	11700	378158	8931.33	992.541	10865.3	816.262	10359.3	1850.72	7960	844.699	11557.3	1253.34	12386	907.61
K01434	9208	6724	7184	9180	7882	9630	9452	10236	9270	10076	10918	9698	13446	11586	9062	10754	10856	9158	8446	7224	9526	10790	7530	6422	13852	12794	12876	14364	13938	17388	11638	10766	10916	11454	12064	10710	377018	7705.33	1321.52	9593.56	839.423	10810.3	1633.43	8323	1612.38	14202	1679.87	11258	546.22
K03596	10318	8486	8602	10024	8904	10152	9924	11456	9934	10564	11012	11130	13592	10328	8958	10652	10514	9306	7722	6774	8056	9704	8668	7446	10634	10266	10232	11090	11702	14362	12558	11918	11718	13636	14342	11894	376578	9135.33	1025.86	10344.4	783.129	10558.3	1636.85	8061.67	1021.51	11381	1561.76	12677.7	1078.42
K01738	11436	8820	8942	10914	9458	11418	11644	13268	11286	12004	12908	11942	13284	10178	8386	9698	8756	8242	8110	6452	8620	9358	8284	8006	11134	10382	10954	11520	11292	14600	11078	10022	10370	11008	12274	10214	376262	9732.67	1476.39	11649.1	1114.9	9757.33	1886.65	8138.33	959.463	11647	1497.06	10827.7	827.31
K01278	11536	7974	9004	8000	6768	8554	8644	9244	8294	8606	9298	8272	13714	11482	9046	10680	13320	7864	8054	6772	8580	10640	7662	5716	14994	13288	13432	21228	18766	21902	9500	8604	9076	9338	9384	8864	376100	9504.67	1833.02	8408.89	749.563	11017.7	2312.3	7904	1678.84	17268.3	3876.23	9127.67	344.962
K03406	6414	8414	6584	13044	11740	14804	13794	15076	14326	11834	13228	13106	11826	9806	10546	11210	13352	11474	6366	5544	6492	9088	7672	5862	10426	9728	10072	14978	13138	14702	7966	7556	7644	8804	11254	7936	375806	7137.33	1108.89	13439.1	1184.79	11369	1208.12	6837.33	1321.18	12174	2393.3	8526.67	1407.11
K14645	8198	6342	6372	9032	8006	10038	9810	10604	9936	10408	11138	10308	14332	11032	9670	11946	14294	9698	6676	5610	7566	8374	6508	4842	14594	12522	13040	19616	14686	20368	10300	9308	9756	10328	10470	10014	375742	6970.67	1063.01	9920	923.193	11828.7	2106.78	6596	1277.89	15804.3	3361.15	10029.3	436.33
K01971	5218	4250	4436	11828	10056	11814	11634	13518	10302	12938	12390	12972	12630	9942	8606	9334	6700	8752	6712	6166	8350	9690	6778	5422	12328	11994	12432	10238	12706	14884	13924	12252	12592	14422	14978	12104	375292	4634.67	513.67	11939.1	1178.35	9327.33	1951.39	7186.33	1560.01	12430.3	1490.21	13378.7	1221.21
K03555	9570	7486	7996	9338	8250	10020	10672	11648	10766	10774	10836	10272	13082	10380	8710	10744	12676	9104	8714	7300	8732	8798	7914	6594	13280	11994	12212	16888	13512	18006	9694	9046	9280	9704	10810	9608	374410	8350.67	1086.33	10286.2	993.103	10782.7	1797.17	8008.67	911.724	14315.3	2520.69	9690.33	607.317
K02025	6270	5812	5238	10836	9816	11818	12082	13006	12734	11040	11796	11916	18022	12614	9990	11558	9510	9220	7104	6764	8266	9134	5288	5318	13080	11960	12558	10910	10398	15284	10598	10224	9786	11172	11332	10518	372972	5773.33	517.085	11671.6	982.012	11819	3304.81	6979	1547.94	12365	1744.66	10605	578.543
K01473	7916	6258	5896	14180	12368	14246	14562	16252	12658	16292	16264	14072	12898	10198	7854	8898	7190	8436	8336	7034	8314	8424	7546	6716	11074	10534	10910	11172	10984	14498	8388	7946	8004	8778	8860	8362	372318	6690	1077.06	14543.8	1486.08	9245.67	2058.42	7728.33	739.781	11528.7	1471.03	8389.67	379.042
K06131	6434	5756	5292	8550	7666	9804	9826	10882	10540	9040	10110	10160	11576	9744	8432	8506	8740	7768	9036	7994	9658	10312	7898	5948	17052	15598	16252	14646	14910	18806	10724	10034	10392	10620	12330	11002	372038	5827.33	574.332	9619.78	1021.42	9127.67	1359.68	8474.33	1551.7	16210.7	1546.65	10850.3	794.72
K00873	9078	7212	6876	9522	8236	9914	9770	11322	9856	9828	10290	9994	12982	9418	7990	10156	10824	8360	8132	6998	8444	10912	7572	6592	13078	12100	12654	12260	12508	15660	12314	11464	11478	12558	12726	11724	370802	7722	1186.29	9859.11	798.747	9955	1824.93	8108.33	1535.81	13043.3	1325.88	12044	558.816
K07491	7474	8080	6504	7806	6674	8656	8930	9628	10266	7648	9144	8076	12976	10374	8844	10078	12430	7670	9010	7804	8526	9510	8174	6284	15556	13588	13616	21412	15626	24236	9326	8758	9068	9662	9522	9636	370572	7352.67	794.975	8536.44	1102.54	10395.3	2036.42	8218	1122.95	17339	4431.75	9328.67	356.807
K00826	10656	7582	8210	10184	8978	10532	11146	11998	10620	10970	11390	11030	13416	10052	8532	9462	9752	8718	8336	6760	8284	9616	7678	6876	11034	10292	10782	11806	11468	15000	11940	10742	10832	11926	12716	11156	370472	8816	1624.13	10760.9	849.589	9988.67	1778.79	7925	1065.45	11730.3	1686.31	11552	771.574
K01754	10680	8048	8486	10140	8514	10280	10382	11838	9904	11260	11708	10606	13348	9744	7956	9558	9074	7686	7852	6780	8536	10696	8472	7674	12486	12112	12010	11328	12618	14084	11280	10510	10580	11624	12032	10406	370292	9071.33	1410.25	10514.7	1020.28	9561	2034.88	8335	1320.74	12439.7	923.641	11072	673.948
K00111	8028	6596	6574	9230	8076	10286	10526	11120	10364	9914	10636	9986	12852	9572	8318	9060	8422	8126	7868	6912	8416	10480	6940	5466	12796	12470	12358	12460	12328	16140	12846	11396	11940	13440	15078	12174	369194	7066	833.189	10015.3	897.915	9391.67	1778.28	7680.33	1700.37	13092	1502.44	12812.3	1319.3
K07658	9310	7648	7308	9986	8776	11272	11664	11982	12828	11538	13220	11572	13076	11478	9040	10698	11062	9560	7056	5920	7176	6372	5042	4372	12236	10580	10992	15948	11250	18126	9726	8946	9106	9954	10494	9472	364786	8088.67	1071.28	11426.4	1355.71	10819	1438.88	5989.67	1114.49	13188.7	3107.66	9616.33	570.432
K00754	8846	6602	7042	10266	9154	10798	11234	12330	10992	11612	12682	11044	11418	9240	6702	8240	10356	7806	7338	6074	7792	9128	6218	5414	13878	12898	13178	15722	12592	18644	9654	8944	9100	9670	11320	10132	364060	7496.67	1189.09	11123.6	1053.52	8960.33	1733.07	6994	1360.45	14485.3	2324.06	9803.33	858.08
K00128	8330	6584	6800	11730	10164	11894	10974	12936	10092	12168	11484	12270	12238	9398	8008	9920	8622	9368	6554	5788	7350	10482	6774	6372	11214	11048	11602	9642	11730	13044	11308	10028	10572	11664	13930	10570	362652	7238	951.847	11523.6	958.427	9592.33	1459.22	7220	1677.48	11380	1104.45	11345.3	1394.13
K01972	9316	7022	7324	9438	8434	10356	9610	11132	9754	10098	10866	10070	11290	8634	7366	8774	9460	7752	7668	6644	8072	9104	7078	5644	11966	11318	11840	12618	12666	15706	12338	11228	11368	12750	14566	11454	360724	7887.33	1246.44	9973.11	802.101	8879.33	1398.63	7368.33	1198.31	12685.7	1564.03	12284	1270.49
K07787	10430	8890	8748	9980	8532	9760	10126	11740	10418	11456	12196	10488	12022	9944	8872	11794	13836	9580	6878	5912	7326	7240	7096	6144	12300	11254	11356	12388	12130	14116	9426	8796	9230	9058	8922	9412	357796	9356	932.817	10521.8	1127.02	11008	1864.26	6766	595.973	12257.3	1030.42	9140.67	259.408
K07029	6886	5574	5796	8896	8352	10230	10116	10834	10160	9616	9894	9550	11970	9518	7416	8436	7680	7474	7632	6954	9342	8944	5454	4242	13000	11910	12376	13120	12014	16712	12590	11926	11890	13426	15514	11964	357408	6085.33	702.226	9738.67	747.393	8749	1766.89	7094.67	1980.33	13188.7	1796.08	12885	1417.69
K01876	9940	7644	8106	9150	8110	9702	9432	10606	9760	10170	10114	9756	12022	9546	8130	8964	9456	8280	7242	6358	7570	9262	7144	6370	11694	11312	11734	12308	12480	15692	11606	10564	10652	11754	13490	11174	357294	8563.33	1214.4	9644.44	715.412	9399.67	1411.15	7324.33	1067.59	12536.7	1604.11	11540	1070.3
K07301	9524	7278	7362	8356	7478	8704	8916	9916	8914	9032	9738	9360	13074	9408	8072	10126	10542	8048	7824	6938	8104	10334	7424	6508	12672	12476	12400	11754	13126	14944	11964	10172	10652	12032	12066	11090	356328	8054.67	1273.17	8934.89	733.95	9878.33	1873.41	7855.33	1345.32	12895.3	1097.63	11329.3	811.751
K05989	4962	4762	3984	9460	8850	11446	11304	12058	13476	11506	11778	12972	12012	8668	7126	8828	9764	8006	4108	4292	5316	5378	3582	3086	18116	17882	17968	21408	18258	23892	6922	6364	6592	7098	7254	7040	355518	4569.33	516.683	11427.8	1484.86	9067.33	1689.28	4293.67	918.733	19587.3	2502.29	6878.33	335.841
K21023	7372	6890	5788	9846	9024	11186	10560	12404	9304	11458	11548	11892	11208	7712	7050	7822	7922	7266	7188	6180	7414	13000	7786	7608	10840	10774	11168	7844	9896	10808	13424	11766	12074	13462	15954	11540	354978	6683.33	811.971	10802.4	1186.73	8163.33	1529.26	8196	2420.09	10221.7	1239.85	13036.7	1650.64
K15371	9178	7626	7024	9564	8214	9482	9406	10672	8600	9980	9662	9172	11236	8412	7372	8406	7278	7402	7646	6312	8780	10586	9598	8104	10502	10678	10770	8464	11860	12082	14030	12514	13042	14162	14558	12142	354516	7942.67	1111.37	9416.89	720.477	8351	1506.01	8504.33	1503.91	10726	1288.08	13408	981.208
K06978	8452	6742	6766	14536	13334	14934	15426	17162	13318	16490	16636	14468	11264	9096	7124	7306	5940	7934	6414	5602	7302	6710	7134	5816	10840	10294	10316	12016	10736	13594	6914	6354	6438	6826	7054	6602	353890	7320	980.414	15144.9	1399.59	8110.67	1858.95	6496.33	688.598	11299.3	1287.25	6698	277.463
K16052	7172	5958	5766	9682	8372	10410	10574	11808	10754	10156	11696	10312	10004	9018	7336	7510	8278	7142	8888	7764	9218	8994	7118	5624	15808	14378	14300	13960	13184	17900	8912	8396	8488	8864	9266	8962	351972	6298.67	762.397	10418.2	1031.41	8214.67	1119.85	7934.33	1393.79	14921.7	1690.11	8814.67	322.276
K22452	6926	6458	5624	8086	7086	8840	8800	9720	9064	9034	9150	8840	12176	9220	7544	8276	7986	6962	7316	6476	8340	9506	6722	5362	14386	13910	14460	14058	14128	16514	12154	11242	11252	11844	13372	11096	351930	6336	659.518	8735.56	750.564	8694	1865.44	7287	1463.98	14576	971.389	11826.7	860.401
K03980	7658	6124	6106	9448	8508	10114	10318	10974	10310	10680	11236	10816	11900	9378	7782	8236	8170	7810	7230	6336	7664	8250	5606	4766	11566	11144	11554	11308	10944	13936	12726	11166	11296	13444	14784	11812	351100	6629.33	890.897	10267.1	844.355	8879.33	1589.83	6642	1316.22	11742	1101.16	12538	1403.76
K02275	10876	8012	8306	11938	10318	12128	11742	12962	11368	13208	13802	12188	14224	10650	8258	10124	8880	8690	6014	5054	6600	8154	7020	6082	10016	9384	10222	7768	9674	10858	9410	8936	9252	9784	9974	8972	350848	9064.67	1575.53	12183.8	1041.55	10137.7	2198.7	6487.33	1050.43	9653.67	1052.01	9388	423.451
K00104	9704	7256	7626	9254	8430	9870	10608	11144	10832	10966	11986	10490	11860	9688	7740	8882	8236	8002	7896	6552	7754	7506	6578	5544	12086	12078	12154	13980	11342	15550	10274	9468	8920	10552	10348	9288	350444	8195.33	1319.58	10397.8	1066.67	9068	1536.65	6971.67	907.885	12865	1581.37	9808.33	668.855
K05515	9332	7510	7898	8790	8078	9490	9728	10290	10190	9918	11062	10410	12926	10224	8092	10494	10628	8362	7164	6238	7592	8524	6432	5196	11756	11030	11320	11830	11076	14146	10624	10184	10216	11050	11988	10278	350066	8246.67	959.738	9772.89	897.978	10121	1759.87	6857.67	1160.7	11859.7	1168.99	10723.3	701.79
K01715	8078	5782	6556	11364	10132	11646	11774	12974	10800	12898	13346	11306	9906	7642	6476	7038	6344	7480	8040	6760	7930	8608	7146	6210	11644	11250	11816	12020	12332	15852	9768	8926	8958	9918	11064	9082	348866	6805.33	1168.13	11804.4	1073.23	7481	1296.58	7449	897.282	12485.7	1688.57	9619.33	825.247
K06207	9496	7686	7792	9074	8274	9672	9714	10710	9454	10336	10530	10384	12634	9704	8170	9996	10424	9178	7164	5804	6820	8542	7288	5678	10376	9746	10118	10480	11082	13210	11640	10626	10732	12324	13066	10904	348828	8324.67	1015.79	9794.22	789.644	10017.7	1498.54	6882.67	1059.76	10835.3	1244.05	11548.7	984.443
K04759	9900	7606	8046	6860	6300	8066	8330	9184	10374	8710	9926	8812	11854	9268	7958	10252	12210	8084	7386	6310	7730	7940	5438	4370	12534	11610	11874	14906	12328	17026	11122	10336	10220	11316	12684	10554	347424	8517.33	1217.47	8506.89	1318.19	9937.67	1829.66	6529	1418.96	13379.7	2137.54	11038.7	915.406
K02316	8028	6616	6436	8030	7120	8984	9152	9984	9398	8890	9302	8614	10794	8262	7144	9208	10342	7540	7136	6174	7334	8524	6464	5304	11956	11218	11222	13664	13058	16554	12294	11074	11566	12952	14886	11588	346812	7026.67	871.838	8830.44	838.069	8881.67	1489.94	6822.67	1105.44	12945.3	2024.05	12393.3	1386.29
K02026	6150	5440	5120	10764	9644	11804	11356	12716	12182	10970	11664	11932	16350	11160	9038	10422	8410	8880	6622	5938	6798	8588	4962	4502	11960	10986	11558	9900	9568	14080	9266	8968	8654	10144	10426	9190	346112	5570	527.162	11448	902.32	10710	2950.58	6235	1463.92	11342	1629.63	9441.33	692.987
K01881	8892	7366	7242	9030	8104	9468	9440	10550	9412	9794	10586	10012	12306	9260	7886	9500	10184	8308	7276	6608	7686	9034	6998	6480	10898	10334	10716	11598	10982	13778	11154	10070	10130	11044	12556	10408	345090	7833.33	918.926	9599.56	768.388	9574	1574.3	7347	936.541	11384.3	1242.86	10893.7	932.868
K02040	7024	6002	5876	9250	8106	9500	9380	10404	9704	9382	10028	9516	12596	9522	8098	9128	9024	7918	7542	6392	7360	9512	7112	6476	12368	11582	11770	11562	11196	14754	10956	10042	10160	11182	12356	10672	343452	6300.67	629.585	9474.44	629.092	9381	1693.16	7399	1134.47	12205.3	1306.36	10894.7	841.21
K02238	8316	6524	6636	8362	7870	8892	9656	10348	9346	9624	10210	9142	11238	8718	7094	9354	10040	7644	7162	6282	7850	8584	6258	5000	12030	11898	12126	13286	12052	15568	11018	9922	10126	11216	13474	10292	343158	7158.67	1003.84	9272.22	811.593	9014.67	1533.97	6856	1280.58	12826.7	1436.25	11008	1311.07
K01937	9324	7716	7786	8980	8076	9094	9116	10408	9098	9844	10146	9874	12382	9366	7994	9532	9718	8520	7196	5970	7316	8864	7340	6562	10174	9580	9698	11186	10806	12922	11294	10416	10756	11754	13032	10526	342366	8275.33	908.846	9404	723.63	9585.33	1520.34	7208	971.754	10727.7	1242.19	11296.3	988.166
K01262	9658	7370	7482	9940	8720	10164	10616	11684	9806	11942	12028	10140	11212	8830	7580	8882	9892	8014	6706	5866	6990	7820	6546	5566	11182	10648	10852	12448	11774	14878	9240	8844	9100	9712	10720	8966	341818	8170	1289.86	10560	1118.21	9068.33	1318.48	6582.33	807.551	11963.7	1571.09	9430.33	699.616
K02108	9834	7286	7874	8508	7838	8830	8862	10056	8862	9000	9510	9388	11812	8892	7538	9062	9816	8086	7720	6626	7380	9054	7578	6284	10920	10688	10756	10856	11112	13450	10504	10278	10282	11458	13992	10932	340924	8331.33	1334.14	8983.78	630.744	9201	1504.6	7440.33	970.049	11297	1064.88	11241	1421.32
K08676	10930	6928	8300	7382	6426	8160	8440	9678	8272	9426	10048	8870	12184	10868	8942	10226	13202	8552	5988	5712	6340	7516	6336	4666	12922	11092	10934	22424	17942	22222	6732	6274	6408	6494	6600	6496	339932	8719.33	2033.69	8522.44	1145.45	10662.3	1811.69	6093	931.397	16256	5340.15	6500.67	157.107
K00337	9894	7830	8274	8942	8184	9302	9220	10382	9162	9978	10584	10336	14066	10164	8646	9706	9066	8622	6732	5580	6836	7578	6232	5464	10682	9704	10578	9844	9720	12526	11020	10104	10180	11468	12372	10368	339346	8666	1086.4	9565.56	799.746	10045	2060.98	6403.67	808.04	10509	1078.49	10918.7	887.328
K06213	9114	7048	6898	9526	8374	9920	9916	11444	9822	10628	11550	10144	10882	8430	7066	8134	8722	7330	8156	6892	8092	9178	8032	6376	11460	10562	11082	11184	11266	13898	10120	9426	9404	9814	10098	9240	339228	7686.67	1238.38	10147.1	976.068	8427.33	1360.56	7787.67	1001.6	11575.3	1177.04	9683.67	379.603
K01887	9176	7144	7284	9146	7870	9432	9210	10274	8964	9716	10088	9542	11510	8676	7502	9376	9782	7906	7428	5976	7536	8502	6988	5744	10454	10598	10674	11674	11350	14296	10644	10004	10276	11252	12772	10110	338876	7868	1134.92	9360.22	704.95	9125.33	1449.45	7029	1034.19	11507.7	1446.38	10843	1047.91
K01883	8320	6620	6632	8662	7486	8878	9200	10208	8838	9456	10212	9608	10822	8332	7032	8410	8738	7288	8082	6798	8164	8898	6728	5778	11536	11078	11126	13610	12310	15948	10836	9846	9814	11392	12036	9900	338622	7190.67	978.05	9172	846.103	8437	1347.95	7408	1160.8	12601.3	1893.91	10637.3	939.469
K01303	11572	7964	8606	6542	5672	7208	7500	8270	7096	8164	8594	7610	13838	10596	8882	10246	10716	7524	7230	6112	7188	9560	7110	6318	12194	11042	11446	16110	14856	17518	9472	8974	8936	9412	9512	8982	338572	9380.67	1924.71	7406.22	913.196	10300.3	2121.22	7253	1226.67	13861	2682.52	9214.67	276.867
K01187	5930	4926	4742	6450	6166	8556	7474	8242	8870	7446	8068	8926	12764	9084	7758	9404	10352	7348	6504	5874	7780	10686	5246	4374	12868	12514	12598	12866	12864	16096	12934	11396	11424	13578	14678	11582	338368	5199.33	639.429	7799.78	998.471	9451.67	1960.28	6744	2248.91	13301	1377.92	12598.7	1360.52
K00248	9078	6864	7348	8920	7514	9690	9974	10956	9476	10420	11080	9998	10112	8292	6716	8256	9196	7454	7324	6156	7862	7938	5798	4924	10580	9946	10280	13452	10888	15754	10578	9860	9940	10894	12980	10254	336752	7763.33	1163.97	9780.89	1092.17	8337.67	1208.67	6667	1227.15	11816.7	2299.1	10751	1159.09
K01669	7592	5598	6232	6938	6104	7108	7046	8152	7120	7418	7562	7580	10376	7578	6418	8304	8520	6572	8900	7918	9630	13072	8280	7096	13484	12790	13344	13004	13986	16644	10996	10382	10040	11354	12288	10180	335606	6474	1018.79	7225.33	562.576	7961.33	1464.19	9149.33	2105.64	13875.3	1417.77	10873.3	856.03
K01595	7578	6474	5820	7760	7000	8300	8224	9728	8444	8148	8454	8670	11654	8888	7494	9128	9648	7036	7002	6296	7828	10396	7086	6126	11816	11388	11930	9586	12090	12884	12078	11250	11080	12398	13634	11220	334536	6624	888.547	8303.11	727.232	8974.67	1650.09	7455.67	1564.58	11615.7	1108.51	11943.3	983.105
K04066	8184	6742	6634	8118	7336	8484	8798	9902	8954	9066	9948	9208	11234	8560	7288	8980	9660	7692	7548	6648	7570	8238	6280	4956	11908	11626	11692	13026	12130	15998	10400	10060	9686	10604	11504	9804	334466	7186.67	865.402	8868.22	826.108	8902.33	1428.63	6873.33	1173.19	12730	1679.25	10343	666.566
K01885	8444	6424	6748	8856	7714	9054	8818	10286	9172	9100	9632	9474	12416	8962	7538	9836	10008	8288	6798	6030	7150	8910	6392	5540	10554	9984	10896	11452	11046	13880	10920	9514	10254	11260	12478	10042	333870	7205.33	1084.88	9122.89	697.508	9508	1701.85	6803.33	1176.56	11302	1356.14	10744.7	1053.55
K02283	7656	6292	6090	9498	8322	9796	9706	10934	9686	10306	10666	10354	11418	8866	7050	9048	7118	8008	6098	5098	7124	8604	5960	5242	8506	8214	9016	8696	9266	11518	13592	12232	12076	14508	15122	12084	333770	6679.33	851.827	9918.67	772.145	8584.67	1622.37	6354.33	1318.35	9202.67	1193.24	13269	1339.84
K02314	7910	6586	6668	7604	7012	8362	8356	9138	8332	8524	8976	8768	11982	9060	7774	9340	11094	7810	6946	6066	6960	9562	6900	5638	10696	10262	10544	11350	11438	13214	11634	10928	10702	11872	13972	11124	333104	7054.67	741.874	8341.33	667.496	9510	1717.84	7012	1364.18	11250.7	1066.22	11705.3	1193.27
K01448	7640	6472	6338	8526	7492	9442	10290	11330	10426	9850	10960	9852	10810	7998	6834	8094	8736	7526	6918	6132	7098	8552	6042	4902	12218	11510	11784	14066	12142	16248	9370	8676	8732	9552	10966	9002	332526	6816.67	716.169	9796.44	1193.82	8333	1368.61	6607.33	1230.67	12994.7	1829.32	9383	848.932
K10112	7072	5624	5548	10808	8778	10848	10618	12550	10946	10814	11134	10770	13162	9760	7852	7580	6104	7034	6382	5568	6960	9532	5528	4774	9820	9670	10316	8152	8848	11118	11596	10326	10686	12070	13168	10700	332216	6081.33	858.784	10807.3	956.554	8582	2547.07	6457.33	1685.24	9654	1050.24	11424.3	1073.58
K25227	6814	5858	5426	6868	6054	7336	7782	8638	8034	7312	7310	7486	16794	11208	9684	11006	10754	6764	7328	6650	7726	8926	5544	4592	12034	11756	12536	8744	11364	12190	11930	11076	10820	12586	12782	11628	331340	6032.67	710.294	7424.44	724.329	11035	3266.27	6794.33	1557.64	11437.3	1377.72	11803.7	789.063
K10440	7286	5678	5564	11854	10526	12182	12422	14030	12846	13728	14512	13730	15292	10968	8250	8200	6372	7642	6002	5258	6544	7048	5288	4374	9264	8248	9438	8638	8584	11252	8420	7660	7770	8328	9218	7868	330284	6176	962.977	12870	1260.89	9454	3230.44	5752.33	972.378	9237.33	1083.02	8210.67	580.887
K01533	7498	6590	6036	9134	8282	9664	9638	10654	9670	9472	10128	9524	13100	10198	8246	10982	10860	9452	5994	5086	6530	8004	6138	5246	10764	10800	10846	8988	10292	12360	10276	9404	9640	10640	10568	9578	330282	6708	738.108	9574	649.086	10473	1636.31	6166.33	1053.94	10675	1084.87	10017.7	542.112
K03593	8084	6164	6274	8050	7364	8680	8622	9844	8520	8710	8996	8720	11328	8542	6792	9100	9222	7620	6896	5918	7230	8770	6316	5536	11458	10630	11432	12550	11722	14708	11082	9840	10122	12116	12572	10312	329842	6840.67	1078.16	8611.78	668.308	8767.33	1558.43	6777.67	1156.02	12083.3	1425.81	11007.3	1123.64
K01687	7310	6484	5840	8736	7960	9666	9580	10516	9574	9778	10392	9980	10636	8264	7048	8216	8166	7638	7496	6046	7562	8632	6922	5864	10812	10884	11030	10250	10884	12684	10812	9994	10000	11292	12134	10298	329380	6544.67	736.875	9575.78	796.763	8328	1223.46	7087	1037.94	11090.7	826.098	10755	842.764
K03703	8544	6350	6906	8584	7846	8764	8896	10002	9128	9738	9994	9488	11154	8268	7178	8890	9520	7652	7206	6094	7406	8578	6790	5748	10814	9900	10382	11876	11370	14318	10346	9520	9810	10708	11568	9808	329144	7266.67	1140.6	9160	718.688	8777	1435.02	6970.33	1012.37	11443.3	1572.3	10293.3	757.192
K01703	7384	6716	6104	10142	8906	10436	10570	11802	9998	10890	11256	10558	11316	8776	7562	8600	8200	8208	6658	5282	6770	7884	6692	5858	9694	9146	9478	11008	10176	13034	10114	9182	9370	10650	10524	9216	328160	6734.67	640.204	10506.4	817.911	8777	1312.31	6524	887.966	10422.7	1433.58	9842.67	669.661
K23537	8774	6988	6984	8888	8434	10338	10272	11046	10866	9486	10424	10430	13084	10064	8086	9498	8988	8138	7028	6076	7002	7436	5082	4540	10826	10090	10330	9856	9312	12898	9284	8734	8824	10024	10478	9156	327764	7582	1032.3	10020.4	890.668	9643	1852.41	6194	1172.79	10552	1254.08	9416.67	692.549
K21573	11188	7054	9616	2944	3454	5746	4662	4772	7410	3186	3288	5676	12722	8272	8468	16640	27296	11912	4642	4382	4328	8846	4584	3030	14096	13416	13312	25004	21824	23310	5904	5376	5584	4754	4910	5274	326882	9286	2086.66	4570.89	1507.04	14218.3	7111.59	4968.67	1990.05	18493.7	5452.42	5300.33	424.768
K11927	9292	7894	7242	8210	7258	8648	8554	9788	8654	9214	9760	9196	11150	8256	7078	8368	8762	7164	6696	5682	7286	9298	6480	5598	10948	10478	10872	10020	11284	13332	10656	10068	10038	11238	12146	10072	326680	8142.67	1047.38	8809.11	794.985	8463	1481	6840	1361.95	11155.7	1151.13	10703	850.211
K00428	7422	5790	5942	9844	8266	10584	9712	11246	10008	9980	10794	9972	12770	10990	8976	10748	10778	8754	5822	4950	6732	8028	5746	4882	11572	11236	11466	8756	9894	12106	9084	8338	8642	9078	8918	8668	326494	6384.67	901.566	10045.1	838.226	10502.7	1476.67	6026.67	1191.05	10838.3	1258.99	8788	292.175
K00600	8122	6432	6692	8604	7882	9230	8890	10128	8984	9234	9932	9230	11900	9392	7674	9800	9040	8070	6974	6082	6950	7420	6318	5408	10568	9694	9848	11336	10194	13252	10254	9878	9606	10876	12342	9960	326196	7082	910	9123.78	669.213	9312.67	1499.46	6525.33	730.758	10815.3	1330.32	10486	1007.11
K00175	10648	7518	8174	8504	7588	8720	9666	9770	9388	10230	10824	8940	11486	8944	7692	8786	9080	7438	7298	6084	7500	6858	6256	5712	10524	9900	10106	12692	10950	14658	9240	8518	8866	9300	9448	8790	326096	8780	1650.65	9292.22	973.402	8904.33	1437.45	6618	712.034	11471.7	1851.88	9027	357.298
K03217	9920	7042	8020	8300	7472	8684	8996	10122	8402	9180	9734	9456	11222	8024	7106	8604	9544	7472	6610	5824	6802	8494	7098	5970	10562	9954	10148	11056	11406	13744	10142	9044	9222	10372	12216	9594	325558	8327.33	1463.41	8927.33	811.843	8662	1521.79	6799.67	962.914	11145	1384.43	10098.3	1157.17
K16898	8058	6346	6360	9148	8102	9532	9232	10664	9102	9920	10136	9494	11958	8592	7906	9536	10648	7444	6768	5544	7214	8812	6684	5026	11690	10966	11094	11962	12292	15024	8514	8060	7918	8382	8816	8000	324944	6921.33	984.407	9481.11	728.198	9347.33	1721.25	6674.67	1331.49	12171.3	1486.02	8281.67	349.366
K02652	9206	8244	7454	8878	7270	9066	9366	10742	9430	10632	11546	9570	10308	8078	7080	7484	8520	7428	8304	6504	7644	7170	7930	7536	9002	8232	8688	12638	9864	14078	9468	9128	8938	9504	10726	9172	324828	8301.33	877.406	9611.11	1248.74	8149.67	1175.48	7514.67	624.976	10417	2383.59	9489.33	642.689
K07080	8404	6156	6556	12646	10966	12060	12540	15124	10784	12222	13006	11190	10312	7144	5812	5764	5820	5440	7114	5808	6538	6818	7010	5748	12646	11798	12244	10596	10722	14796	6666	6150	6548	7232	6880	6704	323964	7038.67	1199.21	12282	1323.89	6715.33	1858.44	6506	597.297	12133.7	1538.35	6696.67	358.367
K06020	8254	7002	6706	7946	6970	8650	7986	9052	7986	8196	8478	8458	11814	9152	8048	8940	9110	8106	6210	5468	6588	8264	6726	5838	9426	9194	9948	8322	10264	11676	12600	11316	11726	13206	13768	11592	322986	7320.67	821.728	8191.33	585.299	9195	1373.67	6515.67	975.337	9805	1135.61	12368	983.576
K01255	7884	6354	6454	7984	6832	8214	8300	9474	8056	8716	9224	8598	11674	8538	7256	8490	8158	6996	7088	6174	7604	8714	7308	6154	10472	10016	10280	9308	11152	12456	11576	10684	10928	11848	12556	10832	322352	6897.33	855.94	8377.56	771.491	8518.67	1673.33	7173.67	961.483	10614	1084.19	11404	724.705
K03284	8724	6382	6956	9054	7734	9452	9570	11518	9840	10064	10526	9860	11738	8190	7300	8814	9454	7270	5222	4432	4800	5920	5010	4430	11544	10672	10962	11580	10454	14262	9996	9138	9378	10900	11588	9414	322148	7354	1220.67	9735.33	1031.67	8794.33	1674.67	4969	561.701	11579	1390.59	10069	977.396
K04487	7518	5690	6312	7948	7030	8798	8484	9884	8692	9466	9994	9306	10268	8272	7264	8604	8838	7888	7558	6304	7796	7948	6202	4942	11052	9880	10372	11376	11158	14980	10712	9574	9750	10540	12072	9620	322092	6506.67	929.418	8844.67	952.146	8522.33	1020.01	6791.67	1178.12	11469.7	1807.47	10378	961.54
K03499	7846	6174	6244	6912	6418	7938	7770	8852	7988	8472	8654	8068	11012	8888	7128	9148	9840	7392	7156	6040	7170	8154	6286	5156	10990	10584	10990	11606	10946	13798	11044	10220	10474	11284	12016	10578	319236	6754.67	945.77	7896.89	792.835	8901.33	1471.04	6660.33	1051.14	11485.7	1179.57	10936	656.267
K15866	7712	5160	5602	10886	9888	10880	10960	12420	9600	11344	11352	11060	10480	7876	6620	7472	6002	7056	6276	5590	7358	8480	6292	5696	10630	11000	11352	8398	11390	11720	8956	8090	8416	8920	9836	8322	319092	6158	1363.83	10932.2	825.109	7584.33	1561.76	6615.33	1108.58	10748.3	1210.1	8756.67	629.413
K07793	7578	5328	5956	18324	15360	16412	17226	20672	14016	17348	17900	16398	10434	7590	5702	5812	4438	7058	5032	3946	4888	6186	6212	5568	7096	7180	7502	5720	7136	8668	4680	4330	4580	4750	5132	4824	316982	6287.33	1161.02	17072.9	1886.56	6839	2080.78	5305.33	867.557	7217	943.42	4716	266.332
K00333	9152	7540	7488	8566	7382	8790	8152	9572	7898	9418	9718	9122	12590	8782	7702	8808	7642	7278	5558	4574	6066	7294	6036	5472	9316	8832	9338	8922	8868	10600	12076	10844	11132	12812	12720	10866	316926	8060	946.057	8735.33	805.122	8800.33	1961	5833.33	896.777	9312.67	669.219	11741.7	912.011
K03654	6234	5282	5268	6852	5928	7388	7072	7716	7490	6642	6828	7168	11030	8202	7358	10046	12028	7778	6884	6192	7220	9548	6088	5520	13282	12406	12680	13794	13526	16760	9858	9132	8760	9498	9784	9060	316302	5594.67	553.723	7009.33	532.067	9407	1908.73	6908.67	1426.82	13741.3	1567.29	9348.67	435.439
K07335	8566	6872	7102	8896	7936	10112	9818	10884	10712	9578	10412	10148	13288	9920	7646	9140	8384	7808	6944	5978	7084	7040	4704	4556	10006	9246	9280	9044	8548	11670	8874	7744	8162	9554	10348	8808	314812	7513.33	918.861	9832.89	930.818	9364.33	2101.91	6051	1174.51	9632.33	1103.36	8915	939.488
K02051	6056	4828	4730	14238	12326	14202	13946	16918	12182	13900	13974	13472	12264	9082	7676	7240	6244	7478	5428	4800	4956	6888	5386	4970	8738	7814	8260	7566	8328	10246	6918	6174	6124	7014	7648	6416	314430	5204.67	738.903	13906.4	1366.25	8330.67	2132.37	5404.67	769.029	8492	952.356	6715.67	588.636
K00797	9158	7112	7092	9066	7732	8832	9336	10298	9184	10592	11608	9068	10502	8730	7008	8012	7914	6816	7580	6120	7150	6784	6242	4782	10728	9880	10214	13978	11324	15960	7364	7220	7086	7586	7874	7244	313176	7787.33	1187.07	9524	1136.97	8163.67	1343.55	6443	981.076	12014	2422.89	7395.67	288.37
K02313	8534	6218	6962	8086	7346	8538	8386	9390	8136	8706	9590	8924	10644	7946	6576	8122	8124	6840	6728	5708	6800	7976	6436	4918	10524	9560	9664	11044	10458	13826	10250	9408	9812	11128	11810	9698	312816	7238	1182.41	8566.89	690.307	8042	1441.3	6427.67	1041.47	10846	1563.63	10351	932.608
K01005	5976	5146	4490	7162	6690	8388	8148	7958	8530	7872	8614	8492	10586	8462	6878	8324	6182	7298	5730	5534	7530	8072	4512	3704	10696	10430	11114	9068	9754	12734	13320	11818	11506	14266	15286	12172	312442	5204	744.696	7983.78	662.055	7955	1552.45	5847	1689.35	10632.7	1257.98	13061.3	1498.21
K02495	9084	7050	7462	6284	5614	7100	7326	8322	7412	7708	8126	7402	10286	8094	6976	8388	9440	6494	6606	5348	6844	8742	6530	5138	12132	11302	11268	12332	11708	14224	10186	9300	9628	10546	12022	9714	312138	7865.33	1075.31	7254.89	852.451	8279.67	1435.7	6534.67	1290.89	12161	1097.87	10232.7	980.467
K04069	8056	6830	6692	6020	5472	7108	7392	7534	8120	7012	8386	7186	8280	7146	6066	7236	8430	6354	7842	6522	8006	6526	5454	4248	12416	11446	11964	15066	11870	16774	10974	10402	10116	11552	11386	10032	311916	7192.67	750.846	7136.67	921.121	7252	966.329	6433	1428.9	13256	2155.2	10743.7	653.639
K10439	5984	5600	5262	10314	9134	11288	11488	13024	12258	12088	12908	12396	13024	10202	8188	8060	6680	7476	5984	5344	6680	5922	4446	4046	9192	8540	8910	8266	7938	10960	8252	7758	7472	8712	8976	8466	311238	5615.33	361.244	11655.3	1267.9	8938.33	2317.86	5403.67	999.843	8967.67	1073.17	8272.67	571.217
K01866	9246	7076	7694	8082	7294	8726	8554	9678	8568	8790	9304	8822	11388	8452	7516	9032	9224	7612	6728	5704	6914	7750	6796	6010	9584	9314	9178	9534	9874	11880	9010	8600	8300	9644	12410	8838	311126	8005.33	1118	8646.44	681.602	8870.67	1420.03	6650.33	722.719	9894	1001.93	9467	1510.67
K03929	4666	3594	4028	10176	8758	11190	11258	12286	11378	10252	11682	11194	8538	6204	5326	5488	4872	5894	5366	4624	5866	5504	4702	3912	16036	15488	15568	14166	14518	17402	7060	6386	6706	6964	7248	6414	310714	4096	539.225	10908.2	1036.3	6053.67	1301.22	4995.67	714.386	15529.7	1153.11	6796.33	353.369
K03686	7344	5406	6030	8910	7546	9258	9156	10244	8978	9986	10084	9434	9808	7724	6418	7810	7628	6970	6208	5540	6634	7226	5828	4642	10238	9696	9714	12026	10290	14272	9930	8694	8714	10470	11476	8798	309130	6260	989.26	9288.44	817.614	7726.33	1151.85	6013	898.068	11039.3	1799.35	9680.33	1148.52
K00648	10082	7154	7698	7900	6808	8286	8586	9732	8914	9486	10048	9100	12366	9644	8190	9784	10522	8118	6952	5914	6758	7740	6372	4874	10686	9394	9900	12226	10642	14420	7040	6644	6514	6790	6986	6840	309110	8311.33	1557.38	8762.22	1004.67	9770.67	1584.06	6435	978.445	11211.3	1841.06	6802.33	199.998
K01011	7332	5328	6080	9810	8266	10118	9762	11642	9598	10526	11292	9962	10638	8264	6522	7250	6538	6694	5900	5096	6444	7800	6356	5318	10470	10058	10292	9354	10060	12190	9080	8296	8296	9062	10124	8732	308550	6246.67	1012.34	10108.4	988.227	7651	1605.49	6152.33	971.286	10404	953.651	8931.67	679.509
K16870	6030	4652	4780	6972	6222	7470	7936	8232	8354	8148	8588	8016	11010	8862	6760	8104	9296	6242	5692	5208	7050	6838	3836	3012	13568	12636	12762	12968	11126	15898	10480	9710	9576	10866	10840	9980	307720	5154	761.333	7770.89	756.446	8379	1746.99	5272.67	1610.21	13159.7	1566.53	10242	565.482
K03628	9098	7500	7144	7760	7042	8170	8146	9704	7962	8616	8944	8744	11212	8148	7246	8474	8448	7254	6190	5440	6750	7220	7048	6566	9178	8468	8858	10198	10082	12276	10092	9378	9478	10212	10938	9404	307388	7914	1040.71	8343.11	766.097	8463.67	1455.98	6535.67	647.708	9843.33	1371.55	9917	617.495
K00817	7898	5948	6530	7840	6930	8274	8418	9308	8000	8436	8798	8756	10318	7926	6102	7852	7496	6896	6666	5654	6874	8560	6252	5376	10376	9814	10328	10126	10636	12770	10050	9358	9766	10918	11994	9514	306758	6792	1001.05	8306.67	678.528	7765	1424.39	6563.67	1133.78	10675	1062.36	10266.7	1009.72
K09181	5986	5124	4664	7882	6628	7810	8242	9260	9112	8226	8630	8102	11128	8146	6568	7338	7726	5968	6628	5668	6510	7014	5634	4256	12462	12386	12512	10700	10948	14636	10268	9758	9528	10756	10410	9720	306334	5258	671.11	8210.22	780.685	7812.33	1804.85	5951.67	995.427	12274	1408.5	10073.3	477.272
K00164	8878	6988	7328	8880	7656	8610	8654	10092	7834	8726	9026	8908	12108	8876	7874	9894	10514	8080	6360	4930	6094	7746	7568	6758	9352	9344	9392	8856	9756	11116	7982	7660	8100	8510	9464	7936	305850	7731.33	1007.49	8709.56	704.412	9557.67	1613.37	6576	1036.76	9636	779.571	8275.33	644.758
K00320	5086	4312	3772	11158	9904	11678	11012	12462	10296	12538	12518	11626	10818	7798	6500	7088	4704	6260	5500	5324	6678	8048	5086	4618	11108	10650	11334	8008	11542	11914	7852	7212	7390	7662	8302	7578	305336	4390	660.463	11465.8	963.598	7194.67	2052.49	5875.67	1265.98	10759.3	1412.76	7666	381.875
K07492	4434	4372	4454	13160	10550	12590	12628	14986	12000	12030	12654	12156	9744	7034	5664	6002	4836	6296	6578	6160	6638	6436	8018	6626	7886	7224	7874	6188	8942	8760	8068	7542	7844	8428	10446	8528	303776	4420	42.7551	12528.2	1175.19	6596	1703.57	6742.67	649.877	7812.33	1016.67	8476	1031.91
K01322	12734	8374	9456	6196	5350	6778	6996	8242	7138	7264	7700	7068	15206	10410	8774	10600	10848	7316	6024	4878	6264	9024	6890	6084	8494	8060	8130	10516	11162	12284	8418	7678	8126	8052	8114	7620	302268	10188	2270.3	6970.22	831.878	10525.7	2660.78	6527.33	1385.96	9774.33	1791.99	8001.33	301.454
K00281	6452	5544	5140	7976	7044	8218	7738	9206	7444	7880	8182	8490	10850	7650	6888	7644	7730	6678	6064	5082	6428	9116	7128	6136	9158	9328	9478	8820	10310	10858	11032	9986	10562	11178	12064	10180	299662	5712	671.94	8019.78	620.318	7906.67	1508.42	6659	1372.93	9658.67	769.239	10833.7	760.427
K08309	8102	6256	6674	8054	7468	8702	9030	10186	8618	8762	9540	8578	9756	7704	6572	8054	8230	7046	6136	5160	6506	6916	6356	4724	11356	10360	10860	11164	10074	13426	7916	7434	7458	8168	10090	8040	299476	7010.67	967.955	8770.89	785.658	7893.67	1105.3	5966.33	844.666	11206.7	1189.08	8184.33	981.349
K04567	7272	5918	6038	6864	5882	7500	7220	7984	7290	7388	7988	7560	9426	7126	6416	7410	8458	6300	6240	5480	6784	7454	5314	4446	10016	9714	9752	10714	10640	12768	11728	10540	10650	12378	13558	10676	298892	6409.33	749.497	7297.33	638.729	7522.67	1215.5	5953	1088.95	10600.7	1145.42	11588.3	1211.16
K08602	6624	5494	5866	8926	7536	9312	9170	10184	9242	9122	9596	8944	13218	10246	8100	10548	10710	8412	5718	5210	6626	5956	4794	4054	9692	8370	8668	10900	9138	12892	7528	6678	6954	8148	8482	7642	298700	5994.67	575.883	9114.67	706.252	10205.7	1849.24	5393	908.636	9943.33	1698.44	7572	685.255
K00036	5580	4720	4518	8938	7958	9292	9488	10332	9576	9896	10694	10634	9516	7186	6006	7032	5860	7082	6282	5314	6048	7194	5498	4510	11088	10604	11098	9888	10034	13166	8848	8090	8332	9240	9880	8172	297594	4939.33	563.952	9645.33	874.166	7113.67	1310.17	5807.67	919.588	10979.7	1186	8760.33	702.904
K02342	8628	6976	6698	5910	5038	6516	6270	7090	6236	5962	6354	6142	10234	7268	6594	8540	9522	6472	6584	5560	7108	8436	6370	5046	10358	9758	10024	9760	10964	12442	12330	10672	11250	11712	12294	10208	297326	7434	1043.34	6168.67	548.564	8105	1573.54	6517.33	1194.79	10551	1031.11	11411	864.188
K03820	7782	6060	6158	8622	7596	9364	9352	10598	9150	9442	10534	9230	9252	7158	5886	7236	6420	6908	6254	5490	6898	7240	5626	4640	9944	9602	9826	10662	9832	12536	8576	7908	7784	8996	10422	8290	297274	6666.67	967.149	9320.89	909.759	7143.33	1150.2	6024.67	964.826	10400.3	1107.07	8662.67	968.951
K03497	6428	5810	5678	8388	6974	8144	8216	9552	8032	8640	9104	8200	10302	8002	6718	8810	9764	7012	5912	5040	5412	9060	5766	4812	9508	9376	9514	9880	9218	12412	9366	8614	8652	9880	11576	9198	296970	5972	400.385	8361.11	722.422	8434.67	1452.79	6000.33	1555.94	9984.67	1209.12	9547.67	1100.35
K14986	7076	5510	5548	8712	7876	9498	9734	11196	9218	10036	10374	9902	9576	7792	6484	7252	7814	6104	4978	4652	4980	6018	4906	3756	12406	12260	12350	10054	9564	12592	8178	7688	7588	8644	8298	8164	296778	6044.67	893.363	9616.22	959.181	7503.67	1227.69	4881.67	725.351	11537.7	1352.32	8093.33	394.193
K15580	6328	5662	4932	8726	8168	10126	9566	9748	10686	9460	10094	9350	12482	9608	7260	7090	5898	6760	6626	5902	8172	6484	4678	4022	10852	10014	10124	7328	7886	10050	8912	8278	8198	8618	9688	8884	296660	5640.67	698.244	9547.11	757.842	8183	2441.51	5980.67	1484	9375.67	1415.19	8763	541.838
K10441	5720	5078	4850	8980	7864	10254	10240	11338	10970	10806	11490	11166	12812	10262	7916	7730	6532	7108	5766	5370	6432	6326	4340	3798	9418	8708	9070	8894	8178	12308	7642	7334	7308	8070	8592	7940	296610	5216	451.119	10345.3	1204.79	8726.67	2372.1	5338.67	1070.03	9429.33	1468.93	7814.33	490.452
K07684	7804	5604	5822	7838	6878	8554	8760	9514	9064	9202	9764	9002	11040	8496	6902	7990	7294	6954	4716	4624	5938	6692	3988	3368	8722	8444	8708	7276	7664	9488	12126	10772	11012	12920	12992	10594	296526	6410	1212.15	8730.67	890.897	8112.67	1562.67	4887.67	1230.98	8383.67	798.461	11736	1085.28
K07161	7308	4958	5680	10494	9604	10582	11076	11702	10126	11278	11418	10696	11150	8178	6924	6868	5006	6888	5778	5126	6370	7494	5888	5428	9104	8830	9250	7102	9438	10390	7684	7064	7156	8144	8380	7278	295840	5982	1203.76	10775.1	664.387	7502.33	2054.65	6014	839.124	9019	1079.48	7617.67	547.291
K01847	6156	5516	5374	7982	6820	7840	7628	9204	7544	7642	8054	8294	9546	6668	6204	7868	8786	6468	6592	5554	6982	8494	6658	5776	9808	9114	9808	9934	11386	13314	9828	8958	9006	10262	11150	9176	295394	5682	416.591	7889.78	644.441	7590	1368.47	6676	1046.42	10560.7	1541.47	9730	864.419
K02669	10332	8254	8020	7856	6774	7674	7966	9430	7480	8982	9882	8468	10914	8436	7502	7562	8038	6924	6238	5066	6040	6752	7580	6710	7104	6382	6564	10524	8912	11422	9602	8776	8744	9390	9826	8864	294990	8868.67	1272.67	8279.11	998.166	8229.33	1411.74	6397.67	842.35	8484.67	2144.1	9200.33	466.945
K17734	5862	4666	4974	7086	5728	7694	8232	8206	8580	7700	8144	7320	11440	9658	7620	9540	13460	7782	5306	4822	5788	10946	4986	5804	10090	9236	8880	13768	8750	13852	8206	7750	7740	8426	8766	8054	294862	5167.33	620.997	7632.22	857.283	9916.67	2232.31	6275.33	2323.31	10762.7	2406.43	8157	398.946
K01439	7384	5476	5656	8590	7714	8790	8970	10018	8498	9158	8866	8488	10566	8164	6490	8378	7848	7284	5788	4986	6314	6952	5464	4508	9360	9098	9212	9860	9564	12276	9376	8344	8352	9724	10568	8766	294850	6172	1053.47	8788	618.04	8121.67	1377.04	5668.67	886.872	9895	1197.32	9188.33	873.654
K00088	7082	5834	5724	8028	7200	8518	8274	9334	8006	8920	9226	8804	10240	7970	6470	7820	7468	7186	6114	5000	6452	6998	5884	4968	9294	8506	9092	9170	9222	11596	9964	8972	9218	10728	11922	9420	294624	6213.33	754.295	8478.89	679.674	7859	1282.04	5902.67	804.356	9480	1074.61	10037.3	1115.5
K07182	8600	7168	6614	8256	6950	8086	8442	9402	8118	8090	8508	8060	11012	8192	6772	8440	8798	6522	6582	5152	6482	6728	5984	5382	10358	10248	10488	8706	9688	12020	8702	8018	8166	8870	8744	8256	294604	7460.67	1024.84	8212.44	633.827	8289.33	1620.47	6051.67	661.256	10251.3	1086.37	8459.33	355.171
K01179	5668	5684	4570	7252	6634	8250	8088	8784	8398	8108	8614	7840	8690	6986	5922	7324	10478	6540	4516	3832	4696	6946	3622	3002	14228	13664	13528	17292	15942	19078	6692	6590	6656	6526	7202	6648	294490	5307.33	638.6	7996.44	678.501	7656.67	1663.98	4435.67	1375.34	15622	2235.94	6719	243.688
K13993	7204	5530	5620	10040	8446	10390	10538	11704	10284	10226	11080	10124	9370	7302	5602	6936	6972	6496	6566	5566	6732	6828	6174	5374	10254	9624	9888	10516	9840	13540	6326	6042	6156	6646	6488	6610	293034	6118	941.58	10314.7	879.208	7113	1252.58	6206.67	615.793	10610.3	1470.16	6378	246.021
K20074	7578	6618	6152	8060	6998	8522	8284	9162	8324	8496	8766	8316	10894	9352	8304	8366	7574	7298	6228	5188	6458	7808	6212	5450	9270	8596	8708	10820	9462	12466	7970	7728	7810	8804	8618	7702	292362	6782.67	727.121	8325.33	591.187	8631.33	1320.02	6224	920.472	9887	1492.63	8105.33	481.987
K02450	7938	6106	6118	6556	5774	6916	7444	8070	8310	6866	7958	7232	7738	5908	4800	5568	6162	4592	8498	6982	7886	7184	7150	6820	14746	13854	13890	12688	11854	17130	7398	7100	7030	7114	6836	7214	291430	6720.67	1054.26	7236.22	810.304	5794.67	1132.38	7420	641.822	14027	1828.07	7115.33	187.18
K22468	6258	5024	4702	6300	5390	6762	6486	7206	6578	6512	6860	7032	9430	6430	5610	6708	6544	5282	6270	5804	7244	8696	5698	4850	11788	11314	11752	8676	10596	12926	12206	10554	11198	12672	12818	11196	291372	5328	821.338	6569.56	526.152	6667.33	1465.78	6427	1359.93	11175.3	1440.43	11774	920.568
K01061	8164	5690	6018	10350	8794	10148	10176	11650	9450	11106	11290	10224	10208	7790	6458	6642	5916	6356	5842	4810	5932	7718	6548	5474	9346	9280	9590	7550	9098	10786	7078	6510	6678	7104	8292	6956	291022	6624	1343.72	10354.2	898.823	7228.33	1588.35	6054	995.66	9275	1038.69	7103	627.412
K09800	7510	5392	5824	5878	5252	6402	6626	8082	6722	7012	7656	6806	8360	6550	6048	7554	8530	5948	7150	5694	6092	9714	6328	5592	12556	11732	12140	12826	12774	15080	8330	7854	7732	8584	9984	8116	290430	6242	1119.16	6715.11	851.289	7165	1144.52	6761.67	1549.94	12851.3	1167.88	8433.33	820.505
K01474	6612	4764	5030	11946	10482	11650	12208	14066	10256	13922	13448	11956	10546	7974	5918	6026	4706	6392	6156	5330	6090	7376	6740	6252	8016	7382	7814	7104	7434	8846	6482	6040	5780	6636	6772	6170	290322	5468.67	999.048	12214.9	1376.59	6927	2061.18	6324	686.434	7766	620.827	6313.33	380.168
K03544	8706	7134	7574	7894	6728	7876	7922	8692	7670	8288	8970	8550	9540	7180	6592	6992	7240	6646	6874	5626	6528	6800	6688	6068	8526	7676	8136	10342	9496	12534	9350	8470	8378	9316	10358	8644	290004	7804.67	810.988	8065.56	663.9	7365	1098.55	6430.67	487.373	9451.67	1790.88	9086	750.555
K23107	5762	4418	4962	8300	7532	9680	9804	10006	9886	9642	10402	9364	11096	8718	6832	7104	5874	6658	5548	5050	6394	6672	4294	3684	10948	10368	10880	9662	9822	12534	8336	7456	7620	8056	8850	7684	289898	5047.33	676.051	9401.78	908.867	7713.67	1902.46	5273.67	1168.12	10702.3	1040.77	8000.33	525.114
K03588	7096	5676	5830	7310	6744	7822	7810	8730	7730	8616	9004	8868	10102	7414	6404	7752	7174	7054	5582	4982	6394	7750	5352	4302	9500	9298	9348	9414	9346	11644	10078	9216	9284	10386	11550	9230	289792	6200.67	779.195	8070.44	776.487	7650	1281.62	5727	1207.04	9758.33	926.427	9957.33	923.782
K01714	7748	5932	6318	9124	7842	9414	9854	10890	8946	10364	10422	9850	9838	7116	5922	7076	6296	6408	5988	5086	5888	7664	5692	4996	8918	8870	8988	8986	9198	11772	8070	7468	7320	8252	9100	7400	289016	6666	956.709	9634	923.278	7109.33	1414.91	5885.67	963.476	9455.33	1140.45	7935	686.801
K07495	4268	4552	3796	9124	7308	8908	8988	10106	10052	7462	8252	8392	7880	6020	5574	5722	6626	4502	6680	6232	7052	7804	6778	6338	12450	12052	12088	13844	11644	15250	5980	5912	6126	6582	10024	7514	287882	4205.33	381.876	8732.44	991.661	6054	1132.43	6814	569.438	12888	1383.56	7023	1585.46
K00864	6376	5138	5038	7044	6140	7234	7332	8304	7414	7104	7520	7596	10978	8202	7032	8046	7324	6188	6122	5224	6538	8144	5262	4774	10346	10340	10174	10242	10382	12926	9696	8926	8884	9892	10986	9008	287876	5517.33	745.306	7298.67	571.396	7961.67	1648.02	6010.67	1228.84	10735	1076.12	9565.33	815.556
K01593	8320	6234	6866	7946	6994	8420	8638	9640	8728	9170	9694	8470	9872	7918	6188	6506	5850	6068	5626	4882	6788	6624	5428	5070	9070	8448	8616	8644	8614	10750	9872	8852	8956	9996	10632	8764	287154	7140	1069.65	8633.33	841.681	7067	1559.4	5736.33	796.879	9023.67	870.854	9512	764.525
K00990	7430	6144	6004	8176	7168	7920	8138	9630	7526	8192	8742	8316	9156	6742	6150	6744	6696	5870	6378	5378	6498	7828	6328	5648	9340	9288	9656	8830	9922	11350	9460	8746	8838	9600	10636	8650	287118	6526	786.01	8200.89	703.056	6893	1166.5	6343	853.809	9731	874.551	9321.67	753.729
K06132	7458	5634	5578	6182	5492	6920	7486	8446	8254	6322	7292	6646	7762	5286	4630	4456	4704	3574	7480	5998	7610	7040	6468	5462	15980	16388	16654	11112	13270	15356	7568	7154	7346	7518	8414	7470	286410	6223.33	1069.62	7004.44	969.491	5068.67	1430.81	6676.33	851.823	14793.3	2172.67	7578.33	435.399
K00789	7382	6280	5966	7432	6480	7610	7576	9000	7322	8146	8374	8296	10420	7848	6962	8498	8314	7068	6082	5126	6092	7740	6120	5266	9006	8680	8972	9578	9276	11616	8856	8154	8850	9328	10232	8452	286400	6542.67	743.646	7804	735.497	8185	1262.29	6071	930.545	9521.33	1070.16	8978.67	732.384
K00573	6832	5642	5406	9184	7824	8786	9192	10508	8808	9474	9794	8798	9308	7258	6112	7314	7170	6274	5660	4842	5980	6864	5938	4902	11054	10456	10820	10210	10154	12606	7346	6910	6854	7264	7502	7144	286190	5960	764.338	9152	749.867	7239.33	1139.55	5697.67	756.898	10883.3	913.087	7170	252.257
K09014	8094	6270	6752	8316	7172	8224	7986	8916	7114	8512	8412	8126	10628	7142	6752	7550	7098	6954	5960	4998	6104	8068	7602	7270	8032	7490	7892	7262	8480	9224	9660	8964	9086	10404	10420	9238	286172	7038.67	945.186	8086.44	595.858	7687.33	1464.49	6667	1166.45	8063.33	710.203	9628.67	650.726
K07303	9532	7042	7344	6138	5488	6754	6682	8232	6488	6376	6520	6240	8716	6414	5336	6238	6474	5264	6994	5966	6548	9360	6662	6098	12166	12474	12502	11892	12978	14200	8354	7700	7508	7776	7772	7790	286018	7972.67	1358.84	6546.44	734.571	6407	1250.45	6938	1244.82	12702	819.214	7816.67	283.54
K01689	7936	5866	6068	7704	6894	7926	7448	8764	7216	8136	8578	8222	10226	7518	6350	7702	7634	6544	6112	5108	6122	7202	5774	5292	9252	8590	8930	10392	9746	12578	9248	8352	8354	9626	10124	8394	285928	6623.33	1141.28	7876.44	620.872	7662.33	1383.36	5935	747.648	9914.67	1450.04	9016.33	764.148
K03553	7254	6222	6060	7592	6994	7314	7696	8270	7644	8280	8152	7716	10150	7888	7062	7682	7802	6834	6282	5566	6606	6930	6462	5848	8968	8166	8540	9708	9166	11618	9340	8488	8726	9366	10110	8866	285368	6512	647.676	7739.78	435.01	7903	1179.69	6282.33	501.656	9361	1225.48	9149.33	583.614
K21071	7860	6500	6512	7792	6798	8212	8022	9002	8248	8950	9554	8504	9868	8000	6292	7452	7924	6142	5766	5066	6214	7216	5688	4582	9694	9238	9582	11578	9872	12224	7798	7232	7400	8108	7912	7464	284266	6957.33	781.755	8342.44	799.611	7613	1361.35	5755.33	916.565	10364.7	1225.05	7652.33	338.26
K22278	7128	5214	5566	7828	6480	7660	8234	9370	7488	9114	9672	8990	11168	8288	6954	7954	7766	6628	4430	3842	4696	5388	4082	3844	9154	8456	8470	9110	8664	11430	10136	9366	9132	10850	11914	9656	284122	5969.33	1018.75	8315.11	1047.16	8126.33	1615.97	4380.33	597.321	9214	1127.45	10175.7	1048.14
K06911	7776	6014	5856	7048	6120	7248	7318	8656	7180	7360	7536	7694	9482	6856	6006	7298	7418	5814	5944	5092	6304	8406	5910	5354	9098	8530	9120	8396	9666	10700	10122	9294	9698	10530	12928	9756	283528	6548.67	1065.83	7351.11	661.73	7145.67	1319.99	6168.33	1180.19	9251.67	844.187	10388	1312.62
K02067	6500	4726	5110	11512	9524	10290	10110	12626	9004	10962	11166	10536	7432	6176	5450	6532	6986	7134	5204	4236	4946	4910	4660	3522	8252	7612	7674	9524	7944	11410	8442	7938	8272	9024	9894	8148	283388	5445.33	933.33	10636.7	1085.18	6618.33	725.432	4579.67	612.59	8736	1484.85	8619.67	724.843
K02343	6832	5410	5474	6892	6150	7350	7562	8300	7370	7668	8082	7970	9550	7036	5856	7168	7548	6118	6240	5286	6440	7790	5992	4814	9814	9580	9512	10238	10334	12608	8982	8306	8684	9452	11258	8634	282300	5905.33	803.155	7482.67	657.7	7212.67	1315.11	6093.67	1031.42	10347.7	1157.05	9219.33	1070.51
K00297	7532	6036	6306	6994	6544	7968	7994	8392	8686	7424	8264	7898	8516	6538	5614	6192	6498	5782	6506	5768	6646	7046	5806	4866	10822	10124	10262	12206	10672	14912	7792	7328	7186	8170	8638	7212	281140	6624.67	797.286	7796	688.715	6523.33	1044.78	6106.33	784.48	11499.7	1828.19	7721	591.149
K01966	7642	6324	6048	7996	7242	8288	8194	9140	7804	8522	8828	8442	9722	7682	6584	7066	6378	6432	5014	4426	6130	6608	5776	5342	7910	7716	7888	8572	8308	10492	9918	8734	9216	10386	10736	9214	280720	6671.33	851.874	8272.89	560.847	7310.67	1279.24	5549.33	787.499	8481	1033.95	9700.67	773.954
K01756	7146	5412	5818	7384	6528	7754	7664	8796	7556	7682	8424	8320	9410	7176	6326	7258	7568	6402	5744	4994	5876	6902	5496	4948	9036	8860	9018	9708	9582	11776	9410	8660	8686	9872	10758	8704	280654	6125.33	906.934	7789.78	664.827	7356.67	1120.44	5660	717.45	9663.33	1088.79	9348.33	847.684
K00602	7064	5682	5942	6922	6104	7388	7150	7976	7250	7840	7906	7718	9826	7322	6394	7620	7930	6406	6084	5066	6348	7364	5710	4646	9416	8686	9132	10138	10146	12410	9142	8508	8398	9658	10592	8452	280336	6229.33	734.439	7361.56	598.172	7583	1266.49	5869.67	967.11	9988	1316.71	9125	871.621
K06400	5266	5130	4356	10236	7782	9068	9084	11660	8294	8952	8792	8776	10190	7650	6712	7814	7748	5672	5258	4732	5510	6194	5330	5106	9786	8994	9110	6506	8180	10058	8520	7722	8044	9552	10072	8402	280258	4917.33	490.862	9182.67	1139.76	7631	1501.88	5355	487.465	8772.33	1290.79	8718.67	907.108
K03545	7092	5602	5652	7270	6106	7458	7296	8398	7656	7712	8114	7612	9276	6974	6256	7348	7746	6314	5932	5256	6476	7718	5552	4698	9482	9332	9456	9850	9772	12358	9170	8032	8244	9060	10682	8606	279558	6115.33	846.188	7513.56	642.562	7319	1120	5938.67	1059.21	10041.7	1151.93	8965.67	950.615
K02434	7820	6248	6400	7750	6640	8032	8154	9172	7870	8270	8858	8506	10208	7374	6444	7612	6918	6808	6202	5018	6206	7022	5916	4870	7906	7760	7906	7342	7806	9966	9646	8340	8832	9866	11054	8602	279344	6822.67	867.053	8139.11	726.142	7560.67	1361.79	5872.33	809.717	8114.33	930.87	9390	1009.54
K01810	6442	4882	5366	6680	5708	7306	7130	7978	7102	6724	7114	7864	8944	6604	6410	6688	7074	5942	6328	5586	6498	8450	5856	4618	9636	9422	9862	9656	10330	12758	9546	8606	8934	9652	11500	9062	278258	5563.33	798.502	7067.33	674.903	6943.67	1047.59	6222.67	1277.71	10277.3	1253.63	9550	1031.66
K00020	7036	5024	5478	11092	9250	10546	10848	12336	9416	11662	11452	10716	9250	6704	5420	5114	4256	5278	5570	4760	5320	7122	6278	5302	8804	8514	8734	7086	8172	9784	6814	6288	6400	7040	8356	6692	277914	5846	1055.27	10813.1	1000.19	6003.67	1774.39	5725.33	843.282	8515.67	883.349	6931.67	749.496
K04656	6442	5716	5122	6018	5102	6476	6856	7130	7178	6628	7674	6620	8990	7444	6228	7470	8026	6186	6198	5530	6950	7380	4982	3926	10746	10420	10706	11252	10554	13740	9186	8590	8438	9640	9096	8494	277134	5760	661.099	6631.33	743.677	7390.67	1074.59	5827.67	1282.7	11236.3	1258.75	8907.33	477.885
K08300	7294	5574	5666	6932	6346	7030	6734	8060	6622	7116	7242	6996	9456	6524	6024	6560	6158	5554	6092	5072	6130	8064	6074	5216	8690	8254	8652	7628	8676	10434	10782	9748	10044	11518	13402	10502	276866	6178	967.578	7008.67	479.823	6712.67	1393.5	6108	1067.41	8722.33	933.257	10999.3	1327.77
K05343	5212	4540	4354	8932	7404	8542	8614	10256	7784	9724	10040	9060	9660	7738	6896	6714	5100	6956	5218	4670	5832	6288	5166	3852	8554	8040	8442	7410	8496	10738	9748	8712	8748	9872	10674	8726	276712	4702	451.358	8928.44	970.186	7177.33	1492.39	5171	857.625	8613.33	1125.84	9413.33	814.693
K00982	7062	5716	5690	7746	6814	7940	7820	9164	7200	8316	8518	8178	8612	6530	5286	6454	6038	5982	5614	4306	5842	6662	5854	4920	8282	8424	8946	9040	8852	10836	10248	9322	9382	10356	11570	9138	276660	6156	784.727	7966.22	697.46	6483.67	1132.92	5533	819.881	9063.33	918.755	10002.7	920.625
K01092	6618	5294	5074	7800	6740	8060	8124	9022	8196	8630	9078	8464	9622	6982	5918	7090	6580	6202	5658	4864	5814	6974	5406	4386	9378	8964	9338	9060	8748	11678	8680	7788	8326	8832	10010	8162	275560	5662	835.196	8234.89	707.743	7065.67	1329.76	5517	888.688	9527.67	1079.5	8633	770.461
K00029	10308	7174	7780	7158	6540	7818	7524	8748	7314	7986	8500	7594	11552	8830	7336	8426	8898	7038	4466	3862	4674	6122	6336	5764	8118	7732	7802	8528	7692	10162	7492	6946	7306	8044	9414	7162	274146	8420.67	1662.33	7686.89	676.669	8680	1605.33	5204	1006.41	8339	946.923	7727.33	906.434
K02674	8460	6708	6880	5384	5404	6608	6936	7016	7246	6764	7382	6420	7988	6508	5926	5562	6308	4576	9698	7264	8274	6800	7380	6340	11602	10862	11116	11946	10032	14304	6660	5872	6254	6504	8112	6728	273824	7349.33	965.703	6573.33	731.166	6144.67	1131.78	7626	1203.39	11643.7	1459.96	6688.33	763.967
K02453	7834	6810	6016	7740	6268	7454	7896	9836	7952	8496	9520	8568	10428	8094	6764	7356	7846	6022	5438	4424	5656	5656	5906	4718	9066	8360	8630	10432	9294	11588	7570	6652	6836	6992	7936	7208	273262	6886.67	911.422	8192.22	1077.96	7751.67	1510.8	5299.67	590.906	9561.67	1224.16	7199	480.566
K07124	5588	4292	4140	7620	6442	7620	7314	8728	7318	7782	8080	7954	8814	6744	5782	6638	6574	5964	5588	5056	6504	8058	4690	4350	9290	9044	9172	9218	9892	11950	9582	8444	8670	10030	11392	8778	273102	4673.33	795.762	7650.89	626.598	6752.67	1082.44	5707.67	1376.67	9761	1112.35	9482.67	1112.73
K00134	8292	5908	6628	6438	6054	7082	7030	7976	7488	7102	7818	7562	9652	7492	6508	8190	8996	7324	6124	4904	5830	7188	5008	4596	8460	7678	7978	10054	9012	11414	8444	7882	7702	8730	10346	7784	272674	6942.67	1222.75	7172.22	626.252	8027	1157.06	5608.33	968.679	9099.33	1411.6	8481.33	999.304
K02011	6276	5080	4746	8578	7694	8364	8148	10022	7884	9034	9016	8466	11828	8196	7066	7750	7292	6404	5566	4808	5656	7172	5376	4934	7568	7446	8120	6988	7762	9536	8362	7576	7568	8534	8954	7970	271740	5367.33	804.453	8578.44	706.333	8089.33	1930.15	5585.33	847.96	7903.33	882.265	8160.67	554.749
K17218	6736	5210	5348	7514	6748	8260	8110	9246	8038	8534	8610	8816	8840	6762	5512	7148	6820	6018	4776	4464	5264	7156	4930	3818	9056	8982	9586	7508	8758	10226	9388	8468	8400	9676	10434	8550	271710	5764.67	844.024	8208.44	739.039	6850	1143.68	5068	1134	9019.33	909.1	9152.67	820.921
K00764	7496	5792	6148	7078	6228	7046	6682	7818	6742	7496	7790	7612	9418	6986	5828	7408	8528	6616	6140	5254	6030	6996	5894	4818	8652	8438	8680	8890	9202	10974	8924	8024	8260	9130	10234	8346	271598	6478.67	898.838	7165.78	552.077	7464	1309.77	5855.33	755.225	9139.33	935.141	8819.67	809.716
K06168	6938	5430	5494	7010	5864	7444	7402	8060	7202	7466	7708	7496	8894	6992	6032	7388	7740	6416	5740	5238	6072	7078	5260	4778	9296	8622	8864	9864	9244	11742	8622	8204	8360	9222	10046	8366	271594	5954	852.77	7294.67	612.038	7243.67	1020.52	5694.33	811.887	9605.33	1129.16	8803.33	707.02
K08352	6168	4980	5170	6968	6484	8208	8562	8798	9090	9082	9812	8518	10746	8344	7082	7898	6762	7282	6408	5248	6640	5520	5174	4722	9378	9028	9622	10558	9708	12918	6124	5908	5558	6226	6618	6010	271322	5439.33	638.155	8391.33	1054.24	8019	1453.13	5618.67	750.338	10202	1424.15	6074	351.98
K00568	6260	4756	4696	6432	5640	6844	7228	7484	6644	7124	7666	6786	9860	7354	6352	7182	6678	5626	5496	4824	5930	6528	4978	4178	11594	10738	10890	11048	10222	14378	8428	7604	7548	8824	9286	8004	271110	5237.33	886.163	6872	608.975	7175.33	1453.62	5322.33	840.173	11478.3	1488.57	8282.33	692.65
K02198	8442	6414	6808	8482	7248	8278	8432	10002	7416	8748	9120	8168	10898	8492	6992	8816	8282	7470	5428	4464	5726	6102	6284	5244	8200	7376	7738	7514	7882	9620	6952	6550	6838	6944	6842	6628	270840	7221.33	1075.33	8432.67	834.275	8491.67	1358.85	5541.33	657.556	8055	819.071	6792.33	166.601
K01903	7456	6074	6048	7846	6970	7988	7970	9150	7504	8270	8388	8248	9278	7090	5976	7018	6338	6536	5872	4888	6114	6700	6296	5746	7734	7386	7860	8126	8298	10110	8616	8070	8082	8984	9582	7930	270542	6526	805.509	8037.11	604.848	7039.33	1173.93	5936	613.756	8252.33	963.545	8544	646.737
K01135	4882	4828	3858	6844	5714	7106	7304	8374	7186	7364	7528	7004	11368	8498	6902	7278	7552	5352	5412	5140	6682	6562	4296	3402	9604	9342	9910	8250	9940	11190	9452	8538	8772	9546	10004	8952	269936	4522.67	576.251	7158.22	697.338	7825	2017.28	5249	1275.58	9706	955.14	9210.67	549.888
K00605	7242	5924	5604	7676	6336	7488	7564	8156	7058	8056	8288	7494	9624	6968	5932	6592	6818	5676	5464	4520	5980	7142	6318	5808	9436	8472	9132	9720	9750	11256	8142	7454	7318	8268	8818	7804	269298	6256.67	868.194	7568.44	602.471	6935	1410.97	5872	874.293	9627.67	926.601	7967.33	557.919
K03076	7844	6084	6584	7132	6070	7338	6816	7952	6820	7054	7196	7516	10616	7454	6596	8250	8110	6594	5336	4572	5244	6678	6014	5214	7674	6692	6990	8424	8072	9664	9108	8244	8514	10018	11394	8794	268672	6837.33	906.936	7099.33	522.962	7936.67	1492.66	5509.67	733.039	7919.33	1072.57	9345.33	1175.91
K02036	6736	5566	5478	7304	6680	7948	7562	8424	7474	7898	8300	7938	10068	7334	6208	6808	6638	6228	5636	4948	5974	6134	5182	4654	8914	8302	8454	8510	8330	11272	8572	8004	8176	8992	9308	8268	268222	5926.67	702.283	7725.33	536.55	7214	1458.8	5421.33	588.14	8963.67	1152.02	8553.33	507.516
K02346	6904	5240	5514	6878	6088	7524	7726	8154	7482	7848	8434	7780	8860	6488	5552	6648	6758	6004	5656	4954	6232	7132	4864	4212	9532	9046	9364	9982	9282	12136	8680	7502	7626	8770	9482	7766	268100	5886	892.195	7546	699.387	6718.33	1141.66	5508.33	1056.86	9890.33	1143.66	8304.33	792.281
K07795	7162	5096	5230	14834	12906	13072	13980	16648	10982	14780	15146	13316	10306	7418	5626	5574	4570	5766	4264	3390	3822	5150	4638	4068	5698	5680	5760	4456	5858	6806	4618	4026	4138	4496	4626	4190	268096	5829.33	1156.07	13962.7	1629.85	6543.33	2059.23	4222	618.376	5709.67	748.222	4349	262.614
K01046	4688	3634	3570	5216	4320	5472	5268	5964	5680	4756	5286	5180	8700	6554	5638	5786	5718	4716	5914	5054	6792	8820	4962	4636	10010	9772	10456	8774	10188	11404	12310	10958	11224	12590	15492	11430	266932	3964	627.818	5238	482.091	6185.33	1363.51	6029.67	1575.73	10100.7	861.261	12334	1672.23
K13292	7418	5796	5602	7092	6014	7612	7538	8248	7732	7272	8016	7578	9558	7522	6030	7388	7340	5984	5572	4562	5772	6430	4596	3752	9730	9064	9118	10556	9578	12878	7524	7026	6864	7978	7872	6834	265446	6272	997.194	7455.78	643.108	7303.67	1303.98	5114	980.067	10154	1439.08	7349.67	510.798
K01662	6160	5244	5274	6360	5610	6478	6554	7358	6342	6482	7052	6658	9300	6484	5556	6828	7246	5556	6024	5120	6012	7202	5776	4378	8882	8890	8942	9068	9500	10720	9866	8706	9314	10222	11210	8952	265326	5559.33	520.409	6543.78	485.923	6828.33	1388.51	5752	952.046	9333.67	717.553	9711.67	924.755
K00705	6100	4568	4906	6972	5990	7286	7162	8148	7324	7570	8134	7426	8340	6526	5694	5980	5904	5574	5408	4816	5948	6792	4640	3982	9496	9318	9182	8946	8796	11532	9924	8954	8644	10140	10082	8874	265078	5191.33	804.871	7334.67	645.767	6336.33	1035.21	5264.33	1005.68	9545	1005.35	9436.33	682.13
K09808	8036	6378	6682	6306	5162	6334	6416	7564	6606	6740	7388	6236	8680	7018	6284	8292	10136	6672	5814	4990	5784	7030	6190	5402	9194	8438	8810	12564	10326	13654	6634	6176	6308	6594	6986	6518	264342	7032	882.675	6528	699.518	7847	1458.92	5868.33	700.277	10497.7	2147.17	6536	281.913
K03821	6964	5058	5264	8448	6894	8142	8472	10104	7418	7648	8550	8146	9558	6346	5296	6146	5864	4892	5296	4530	6114	6184	6518	5954	8700	7654	8440	6834	7584	9172	8496	7844	8156	8800	9870	7768	263124	5762	1046.05	8202.44	902.171	6350.33	1661.67	5766	727.361	8064	858.48	8489	781.113
K01259	7704	5408	5706	6720	5744	7154	7182	7736	7454	7512	7902	7570	10902	7786	6246	7674	7356	6326	4552	3986	5340	5952	4290	3550	8418	7786	8130	8582	8480	10748	9190	8108	8278	9180	9852	8368	262872	6272.67	1248.49	7219.33	654.625	7715	1695.87	4611.67	889.11	8690.67	1048.42	8829.33	683.522
K07485	3720	4096	3198	6394	5410	6222	6404	7206	7566	5808	6496	6100	6012	5358	4340	5340	5688	4390	5762	5086	6216	6826	5096	4536	10094	9890	10352	8980	8898	11180	11962	11276	11264	11850	12778	10846	262640	3671.33	450.974	6400.67	658.664	5188	683.65	5587	843.572	9899	863.81	11662.7	684.698
K00973	6754	5222	5608	6670	6168	7192	7338	8178	7164	7436	7872	7360	9130	7032	5706	7698	8132	6506	5982	4962	5770	6286	5278	4346	9144	7956	8880	9066	8102	11334	7760	7088	7226	8316	10038	7792	262492	5861.33	796.799	7264.22	593.567	7367.33	1217.82	5437.33	716.924	9080.33	1212	8036.67	1074.89
K21470	5378	4754	4386	9922	8006	9376	10000	12226	9352	9736	10194	9482	9336	6028	5082	6550	5750	5640	5224	4544	5158	6144	5256	3734	8996	8778	8780	6714	8176	10170	6740	6064	6124	6976	7206	6420	262402	4839.33	501.475	9810.44	1106.73	6397.67	1517.77	5010	807.404	8602.33	1133.36	6588.33	463.393
K01406	6354	4820	4726	6516	5768	6432	6840	8374	6804	7960	7840	7262	11156	7814	6324	8530	8346	6132	5386	4468	4606	10080	4778	4256	7260	6458	6732	6306	6882	7940	9966	9158	9130	10566	10990	9124	262084	5300	914	7088.44	840.538	8050.33	1826.4	5595.67	2230.14	6929.67	597.104	9822.33	817.98
K07576	6806	5168	5322	5950	5116	6110	6984	7564	6892	6806	7364	6686	8960	6732	5738	6888	7604	6062	5360	4830	5798	6864	4832	3396	11114	10236	10870	10462	10388	13010	8026	7186	7228	8020	8156	7512	262040	5765.33	904.527	6608	763.202	6997.33	1163.03	5180	1155.55	11013.3	1031.18	7688	433.145
K20035	8466	5786	6148	6790	5748	6892	7206	7748	6808	6758	6630	7196	9856	7104	6320	6876	6702	6212	6030	4518	5682	7166	5902	5126	6832	6570	6948	7468	7656	8988	9484	8360	8824	10178	11836	9172	261986	6800	1454.11	6864	539.617	7178.33	1353.83	5737.33	896.373	7410.33	872.593	9642.33	1237.69
K21430	5224	4146	3942	8976	7356	8568	8900	10330	7526	8172	8640	8176	9224	6084	4910	6346	6058	5180	5448	4678	6056	8290	6056	5858	9140	8696	8980	7586	9398	9716	7486	6602	6618	7394	8380	6774	260914	4437.33	688.867	8516	882.282	6300.33	1539.07	6064.33	1208.15	8919.33	740.787	7209	691.252
K01875	6824	5442	5724	7034	6150	7392	7520	8218	7020	7478	8218	7358	8524	6342	5652	6934	6898	6148	5654	4710	5566	6988	5030	4534	8184	7982	8182	9220	8650	10690	8438	7570	7774	8794	9872	8116	260830	5996.67	730.234	7376.44	632.102	6749.67	993.711	5413.67	891.701	8818	1019.76	8427.33	834.316
K01755	6784	5610	5560	6988	5998	7278	6848	7888	6934	7458	7554	7300	8846	6636	5624	6786	6668	5702	5950	4880	5858	7022	5530	4884	8746	8592	8754	8058	8800	10918	8514	7850	7734	8810	9224	7690	260276	5984.67	692.694	7138.44	539.863	6710.33	1163.7	5687.33	800.168	8978	989.412	8303.67	641.022
K03106	6552	5254	5508	6912	6016	7598	6878	8000	6750	7542	8106	7472	8230	6678	5740	6956	7154	6076	5728	4620	5702	7018	5490	5060	8072	7276	7414	8216	8352	10558	8864	8416	8218	9402	10268	8166	260262	5771.33	687.902	7252.67	668.6	6805.67	878.296	5603	812.596	8314.67	1182.59	8889	820.016
K02600	6476	5494	5428	6896	6256	7094	6926	7836	6796	7300	7960	7314	9366	7338	6448	7428	7724	6544	5606	4836	5762	6460	5848	4818	8354	7842	7648	8804	8634	11060	7860	7604	7540	8456	8710	7722	260188	5799.33	586.939	7153.11	526.591	7474.67	1056.44	5555	634.106	8723.67	1228.33	7982	484.849
K03522	6302	5280	5056	6448	5898	7534	7408	7728	7788	7856	8442	7532	7838	6166	5368	5770	5530	5476	6612	5234	6396	5596	4878	3946	9856	9290	9456	12392	9822	14842	7032	6308	6596	7318	8074	6978	260046	5546	664.226	7403.78	770.507	6024.67	932.732	5443.67	990.161	10943	2221.87	7051	613.609
K07483	4288	4130	3736	8526	7374	8582	8984	9422	8440	8494	8616	8200	7616	6048	5014	5002	5076	4740	5964	5528	6374	5646	5888	4786	9550	8958	9340	8932	8508	11930	7546	7190	7056	7418	9302	7564	259768	4051.33	284.284	8515.33	555.044	5582.67	1093.47	5697.67	534.262	9536.33	1226.83	7679.33	819.806
K00948	7244	5448	5350	7298	6452	7386	7574	8500	6934	7518	8160	7652	9748	7510	6324	7436	7510	6428	5412	4480	5204	6132	5388	4538	7942	7234	7742	8306	8386	10184	8128	7514	7474	8276	8996	7584	259392	6014	1066.34	7497.11	605.897	7492.67	1232.04	5192.33	617.288	8299	1013.19	7995.33	595.042
K01524	5610	4460	4484	7694	6250	7404	7508	8808	6698	8052	8208	7748	8308	6004	5338	6298	6254	5826	5418	4798	6006	7328	5194	4606	8798	8126	8456	7878	8698	10530	8826	7838	8264	9114	10236	8284	259350	4851.33	657.134	7596.67	770.297	6338	1025.99	5558.33	996.956	8747.67	939.103	8760.33	852.165
K03733	5510	4438	4654	6596	5884	7428	7374	8152	7766	6986	7292	6938	8162	6712	5538	6216	6610	5246	5788	5336	6210	6556	4446	3748	10472	10086	10372	9796	9014	11986	7594	6856	7042	7944	8862	7306	256916	4867.33	566.947	7157.33	662.581	6414	1034.75	5347.33	1074.21	10287.7	982.859	7600.67	729.705
K01840	5602	4584	4314	6166	5364	6822	6376	6848	6510	6462	6580	6606	8552	6344	5348	6458	6672	5340	4848	4590	5670	7502	4388	3686	8746	8342	8814	8452	9184	10454	10602	9134	9566	10906	12042	9038	256912	4833.33	679.236	6414.89	446.682	6452.33	1176.9	5114	1335.91	8998.67	772.055	10214.7	1178.16
K13821	6004	5054	4598	6442	5866	6930	6842	8122	6896	6402	6960	7304	9876	6590	6064	6926	6720	5798	5842	4690	5806	7980	7084	6100	8478	8498	8764	7460	8986	10262	7898	6726	7392	8314	9834	7296	256804	5218.67	717.318	6862.67	630.353	6995.67	1472.69	6250.33	1140.89	8741.33	910.294	7910	1087.41
K08738	6102	4638	4822	9432	7948	9306	9216	11278	8368	8900	9214	9154	11016	8164	6450	8330	7734	6902	4286	3786	4950	5854	5250	4158	7090	6492	6776	7342	7424	8924	6152	5726	5782	6512	6772	6100	256350	5187.33	797.449	9201.78	917.565	8099.33	1603.23	4714	774.093	7341.33	850.389	6174	407.965
K01961	6954	5288	5556	7154	6512	7734	7634	8714	7006	8622	9000	7914	9478	7566	6376	7380	7934	6684	5152	4290	4916	5872	5556	4370	8022	7304	7470	9686	8374	10876	6898	6218	6290	6988	7658	6500	255946	5932.67	894.593	7810	844.229	7569.67	1097.24	5026	631.922	8622	1392.72	6758.67	540.312
K02037	6104	5006	4608	7266	6056	7416	7440	8362	7636	7806	8102	8052	9182	6894	5792	6716	7262	5894	5284	4560	5370	5998	4800	4094	8406	7848	8410	8840	8484	10554	7866	7390	7406	8276	8842	7772	255794	5239.33	774.814	7570.67	673.414	6956.67	1232.31	5017.67	673.22	8757	936.004	7925.33	556.159
K16150	4640	3484	3310	6758	5516	6866	7114	8184	6934	7152	7708	7316	8836	6758	5120	6306	5880	5360	4706	4260	5762	6790	3680	3066	9894	8942	9636	9748	9102	11810	9212	8248	8418	9786	10920	8452	255674	3811.33	722.901	7060.89	732.192	6376.67	1345.97	4710.67	1371.08	9855.33	1027.96	9172.67	1036.8
K03789	5784	4522	4764	6678	5836	7408	7614	8298	7760	7750	8364	7552	9274	7362	5968	6930	6366	5978	5534	4884	5986	6340	4434	3448	9220	8544	8788	8300	8376	11098	7982	7196	7260	8052	8578	7412	255640	5023.33	669.777	7473.33	788.649	6979.67	1250.28	5104.33	1070.53	9054.33	1054.95	7746.67	546.224
K03587	6732	5264	5360	7026	5956	6988	7034	7958	6678	7650	8028	7550	8556	6120	5358	6702	7044	6058	5400	4558	5666	6644	4998	4096	8234	7898	8266	9482	9156	10922	8094	7472	7582	8322	9500	7202	255554	5785.33	821.241	7207.56	662.14	6639.67	1103.7	5227	895.511	8993	1121.64	8028.67	830.41
K18989	8488	6440	6826	6360	5518	6848	7004	8378	7302	7548	7964	7310	7868	5924	5594	6890	7794	5780	5556	4588	5252	6802	6396	5010	9342	9022	9376	10618	10112	12068	6370	5584	5856	5780	5834	5806	255208	7251.33	1088.24	7136.89	849.719	6641.67	1024.55	5600.67	845.423	10089.7	1131.52	5871.67	262.856
K01053	5366	3776	4258	10872	8754	10160	9962	12596	8774	11188	11502	10500	8940	6634	4786	5626	5204	4988	4020	3628	4370	5880	4358	4134	8254	7822	8286	8442	9164	10756	5562	5010	4946	5308	5978	5328	255132	4466.67	815.28	10478.7	1246.87	6029.67	1569.18	4398.33	775.137	8787.33	1058.72	5355.33	379.532
K02050	5524	4062	4416	11806	10290	12468	11740	13606	10550	11630	12062	12062	10846	7682	6632	5800	4872	6048	4116	3568	4006	5812	4580	3594	6074	5942	6140	5540	6470	7358	4742	4424	4466	5210	5706	4958	254802	4667.33	762.717	11801.6	982.361	6980	2110.19	4279.33	838.634	6254	619.356	4917.67	487.262
K13419	4680	4462	4152	6110	5750	7474	7790	7260	9266	6470	7660	6912	9570	8702	6328	6460	5386	5822	5838	5290	7206	4514	3192	2510	11988	10812	10692	7924	7414	11042	7500	7526	7126	7714	8152	7774	254468	4431.33	265.332	7188	1049.52	7044.67	1686.75	4758.33	1732.49	9978.67	1853.14	7632	341.17
K06942	6492	5064	5290	6754	5854	6742	6876	7826	7104	7018	7496	7246	8856	6862	6034	6890	7500	6106	5364	4406	5476	5888	4766	4470	9070	8562	8968	9346	8426	11154	7798	7094	6960	8158	9006	7396	254318	5615.33	767.579	6990.67	553.956	7041.33	1043.84	5061.67	602.211	9254.33	989.804	7735.33	764.822
K11381	7214	5162	5882	7456	6244	7796	8090	8512	7878	8152	8956	8604	10772	8310	6652	8276	9142	6846	4332	3966	4644	5444	4180	3414	7820	7462	7968	8720	8808	10050	6216	5928	5790	6242	6398	6162	253488	6086	1041.1	7965.33	790.352	8333	1526.03	4330	683.176	8471.33	934.206	6122.67	223.101
K03333	5074	4012	3696	6212	5434	6604	6314	7106	6270	5750	6080	6318	8540	6510	5572	6702	6374	5960	4548	4074	5696	6146	3666	2886	8820	8464	8982	8434	8450	10562	10840	10004	10006	11142	12370	9804	253422	4260.67	721.871	6232	475.717	6609.67	1029.47	4502.67	1234.83	8952	820.841	10694.3	976.989
K19519	4654	3854	3542	5366	4388	5270	5424	6086	5526	5196	5536	5136	9994	7370	5884	8892	9106	5984	5290	4960	6078	7940	4316	3560	11814	11122	11308	9938	10738	13444	7470	7068	6904	8010	8280	7542	252990	4016.67	573.569	5325.33	448.453	7871.67	1722.48	5357.33	1527.53	11394	1184.11	7545.67	529.243
K22894	4078	3248	3024	7250	6636	8412	8166	8382	8008	8640	8252	7972	11216	8844	6738	5688	3800	4954	4732	4398	5568	6916	3904	3820	8226	8298	8482	6364	7820	8980	9198	7994	7858	9310	9622	8086	252884	3450	555.277	7968.67	635.545	6873.33	2731.11	4889.67	1178.85	8028.33	898.519	8678	781.24
K01273	7904	5974	7634	6338	5418	6512	6820	7424	6596	6878	7072	6366	8446	7564	5984	6512	5968	5308	5660	4702	5914	5792	4998	4320	7982	7116	7264	8466	7984	10182	8850	8368	8110	9228	8408	8534	252596	7170.67	1045.1	6602.67	565.206	6630.33	1165.11	5231	652.58	8165.67	1107.91	8583	397.566
K01940	6682	5328	5478	6758	6058	7030	6872	7488	6514	6860	7114	7012	8854	6804	6140	7068	7258	6124	5074	4494	5412	6960	5498	4788	7936	7612	7998	7450	8190	9888	8616	7804	7388	8440	9456	7510	251956	5829.33	742.23	6856.22	400.663	7041.33	1004.36	5371	864.865	8179	879.266	8202.33	787.454
K03581	3380	3298	2808	6066	5286	6624	6810	7014	7640	6028	6652	6212	7814	6494	5670	6634	7216	5468	6180	5536	5896	5776	4520	3596	10086	9048	9404	10190	9180	12940	8422	7878	7854	9202	10766	8080	251668	3162	309.302	6481.33	676.676	6549.33	894.043	5250.67	990.889	10141.3	1449.22	8700.33	1129.02
K03327	7486	5356	5666	5862	5298	6224	5902	6928	5858	5848	6410	5774	8332	6972	5890	7876	9358	6074	5696	4746	5596	7934	6038	5300	8680	8370	8628	10498	10168	11968	6936	6342	6578	6804	7320	6444	251160	6169.33	1150.75	6011.56	460.17	7417	1352.69	5885	1093.67	9718.67	1411.1	6737.33	360.869
K01928	6010	4864	4914	6266	5560	6564	6530	7634	6600	6932	7084	6550	7688	6426	5318	6490	7220	5596	5354	4654	5846	6638	4774	3862	9326	8654	8594	9662	9066	11726	7718	7570	7496	8312	9766	7762	251026	5262.67	647.692	6635.56	570.538	6456.33	909.749	5188	977.532	9504.67	1160.72	8104	863.283
K00632	6800	5304	5482	7722	7184	8084	8386	9198	7602	8760	9200	8188	8466	6918	5428	5858	5026	5986	4926	4240	5534	6216	4798	4224	7238	7138	7374	7788	7930	9538	7262	6694	7144	7686	8582	7114	251018	5862	817.193	8258.22	702.285	6280.33	1244.88	4989.67	773.205	7834.33	890.638	7413.67	654.616
K01892	6444	5038	5206	6650	5652	7096	6774	7916	6624	7182	7388	7014	8154	6118	5458	6854	6960	6092	5028	4576	5586	6576	4976	4126	7992	7866	8050	8786	8486	10992	8312	7490	7536	8366	9108	7712	250184	5562.67	767.865	6921.78	623.41	6606	938.442	5144.67	854.004	8695.33	1176.92	8087.33	627.94
K13020	5292	4372	4100	6694	5482	7100	7096	8154	7586	7378	7462	7590	9816	7332	5928	6642	6680	5668	4824	4634	5966	5650	3780	2932	9850	9316	9508	10818	9908	13290	6782	6120	5910	6742	7038	6712	250152	4588	624.666	7171.33	752.705	7011	1496.22	4631	1137.42	10448.3	1485.13	6550.67	435.792
K01130	4622	3734	3734	8404	7026	8154	8414	9536	7992	8596	8924	7948	8870	7376	5940	6624	5538	5512	4786	4256	6170	5032	4730	3688	9546	8272	8450	11640	9924	14098	5558	5048	5068	5398	5624	5642	249874	4030	512.687	8332.67	696.604	6643.33	1303.19	4777	832.481	10321.7	2211.91	5389.67	270.996
K07814	6434	4772	5256	7488	6544	8194	9022	9612	9292	10280	11260	9134	8782	7432	5772	7214	7794	7310	5366	4270	4842	4240	4460	3134	7718	6884	7378	10858	7628	11766	4678	4666	4576	4978	5320	5062	249416	5487.33	854.808	8980.67	1422.52	7384	975.472	4385.33	745.129	8705.33	2059.91	4880	288.217
K00008	5216	4254	3920	6914	5998	7902	8138	8362	8320	8018	8854	7992	8156	6828	4720	5350	4336	5554	6436	5586	6712	5782	3606	3244	9030	8812	9454	9580	8474	11576	6944	6384	6574	7236	7640	6826	248728	4463.33	672.881	7833.11	860.852	5824	1426.66	5227.67	1460.39	9487.67	1101.3	6934	454.644
K01586	5230	4382	4410	6544	5810	7238	6834	7920	6920	7502	7540	7362	7754	6196	4992	6134	6556	5846	5320	4546	5146	6334	4710	3954	8958	8756	8768	9122	9274	11136	8030	6878	7406	8346	9398	7356	248608	4674	481.714	7074.44	631.051	6246.33	907.494	5001.67	810.875	9335.67	904.605	7902.33	899.36
K07462	6604	5216	5514	6136	5902	6828	7162	8080	7332	7316	7916	7212	8618	7100	5704	8054	8880	6640	5914	4736	5372	5730	4706	4042	8598	7532	7668	9590	8474	11428	6174	5768	6170	6346	7756	6358	248576	5778	730.69	7098.22	722.978	7499.33	1231.78	5083.33	712.588	8881.67	1450.99	6428.67	684.381
K06324	5662	4796	4466	6458	5906	7608	7590	8420	8340	8740	9404	8418	9440	7986	6078	7840	6414	7194	3796	3514	4628	4688	3416	2736	8632	8560	8388	6376	7110	9078	8078	7464	7250	8246	8486	7292	248498	4974.67	617.694	7876	1114.2	7492	1217.38	3796.33	753.049	8024	1044.19	7802.67	532.957
K01468	8008	5370	5908	6334	5488	6708	7068	7668	6566	6868	7302	6748	9150	6970	5940	6556	6528	5240	4656	3846	5124	5468	5002	4318	9392	8816	8678	9762	9184	11714	7212	6484	6688	7344	7440	6918	248466	6428.67	1393.94	6750	618.85	6730.67	1328.85	4735.67	588.277	9591	1111.38	7014.33	381.044
K03734	6026	4950	4596	6154	5360	6804	6722	7528	7006	6928	7278	6944	8036	6564	4900	6380	7106	5354	4396	3704	4540	5816	4208	3494	9954	9708	10188	8922	9038	11306	8204	7422	7746	8720	8774	7640	248416	5190.67	744.759	6747.11	643.221	6390	1144.18	4359.67	819.393	9852.67	870.132	8084.33	573.519
K11085	7158	5270	5560	6948	5944	6898	7506	8750	7162	7598	8364	7360	8990	7600	5934	6600	7676	5768	5608	4634	5248	6598	5750	4234	8342	7712	7738	9692	8898	10782	5888	5504	5878	5970	6622	6074	248258	5996	1016.71	7392.22	824.332	7094.67	1227.8	5345.33	842.906	8860.67	1202.74	5989.33	364.972
K00074	7166	5024	5288	7452	6308	6958	7498	8400	7262	8184	8126	7590	8036	5934	4862	6310	6194	5892	4496	4034	4978	5350	4712	3718	7052	6902	7306	8400	7656	10136	8634	7814	7908	9146	10004	7500	248230	5826	1167.96	7530.89	656.013	6204.67	1033.32	4548	601.797	7908.67	1214.64	8501	950.615
K14393	7908	6630	5782	5524	4704	5736	5536	6750	5444	5458	6184	5958	9280	6506	5766	7896	7956	6106	5088	4420	5032	6442	4916	4480	7584	7400	7566	6308	8194	8740	9306	8680	8828	9924	11138	8936	248106	6773.33	1070.22	5699.33	567.737	7251.67	1349.16	5063	731.871	7632	819.386	9468.67	931.305
K00012	5938	4514	4654	6670	5558	6926	7176	7776	7026	7302	7606	7146	8570	6372	5482	6766	6814	5882	5018	4286	5324	6288	4662	3814	8510	7756	7916	8746	8532	10894	8016	7394	7440	8446	9226	7592	248038	5035.33	784.86	7020.67	642.6	6647.67	1073.13	4898.67	864.091	8725.67	1129.77	8019	713.776
K01924	6418	4860	5098	6536	5888	6878	7340	7970	6798	7498	7990	7378	7776	5868	5454	6426	6658	5620	5314	4588	5474	6532	5076	4002	8118	7618	8164	8888	8506	10684	7772	7150	7096	8056	8834	7202	247528	5458.67	839.286	7141.78	685.028	6300.33	858.761	5164.33	857.88	8663	1076.83	7685	682.912
K03072	6792	5358	5696	6334	5514	6708	6588	7802	6206	6834	7608	6806	8528	6716	5554	6920	6588	6150	5502	4342	5278	6252	5196	4438	7710	7306	7572	8324	8100	9988	8244	7874	7712	8450	8850	7672	247512	5948.67	749.646	6711.11	694.995	6742.67	1000.77	5168	709.179	8166.67	964.3	8133.67	465.562
K03722	6296	4958	4836	5652	5232	6694	6134	6754	6168	6338	7010	6364	8230	6426	5432	6318	6292	5324	5570	4694	6400	6384	4578	3968	8454	8400	8252	8428	8096	10118	9296	8208	8576	9112	9708	8122	246822	5363.33	810.013	6260.67	554.817	6337	1042.97	5265.67	1011.3	8624.67	743.867	8837	635.6
K03561	7394	5814	5826	5770	4974	6084	6120	7156	5688	6334	6678	6140	8434	6398	5938	6682	8456	5490	6056	5036	5912	8090	6412	5688	9026	8372	8360	11478	10608	12364	5860	5444	5580	5170	6102	5772	246706	6344.67	908.769	6104.89	617.711	6899.67	1263.91	6199	1033.22	10034.7	1698.48	5654.67	328.905
K02038	5478	4818	4456	6568	5828	7206	6960	7878	7152	7076	7486	7124	9174	6796	5670	6730	6644	5730	4866	4702	5032	5804	4726	4150	8178	7978	8150	8356	8162	10510	7696	7374	7292	8128	9042	7698	246618	4917.33	518.19	7030.89	575.217	6790.67	1271.72	4880	541.364	8555.67	964.9	7871.67	644.995
K08217	7266	5546	5872	7120	6414	8028	8184	8288	8842	8144	8904	8472	10612	8760	6406	7770	6254	7066	4356	4130	4856	4574	3054	2880	6242	5512	5696	5464	5028	6896	8182	7718	7368	8658	10246	7672	246480	6228	913.593	8044	803.092	7811.33	1655.37	3975	818.708	5806.33	663.171	8307.33	1051.7
K06076	6588	5352	5332	5146	4462	5438	5204	5790	5826	5794	6480	6058	6306	5110	4678	5502	6840	4790	5886	4728	5452	4578	4598	3342	11416	10266	10784	12490	10230	14052	7326	6948	7526	7602	10376	7950	246246	5757.33	719.448	5577.56	590.409	5537.67	868.172	4764	873.815	11539.7	1492.56	7954.67	1231.23
K03578	4634	3722	3812	4060	3660	5220	4594	4846	5396	3542	4230	5048	7414	5328	4902	5156	5370	4372	5498	4908	5904	7538	4216	3646	10234	10578	10928	9410	10802	12100	10838	9754	10312	11268	12694	9786	245720	4056	502.581	4510.67	674.436	5423.67	1041.46	5285	1376.64	10675.3	884.859	10775.3	1110.36
K03631	5944	4364	4900	5772	5218	6206	6408	6930	6552	6622	7142	6558	7618	5936	5024	6124	7106	5584	5330	4590	5602	6108	4668	3944	8804	8214	8636	9472	8956	11546	8426	7634	7710	8308	9380	8108	245444	5069.33	803.496	6378.67	586.721	6232	965.745	5040.33	785.196	9271.33	1187.76	8261	632.73
K02115	6162	4790	4646	6106	5364	6198	6448	7328	6152	6630	6816	6670	8644	6616	5300	6458	6810	5400	5126	4660	5176	6930	5396	4596	8698	8386	8924	8788	8744	11116	7766	7062	7230	7980	8882	7434	245432	5199.33	836.797	6412.44	550.34	6538	1212.39	5314	850.389	9109.33	999.018	7725.67	659.489
K08972	3686	3340	3168	6012	5512	6924	6866	6920	7588	6972	7460	7162	10220	8082	5950	5814	4928	4818	4826	4722	6044	5252	2948	2166	10394	9842	10172	7536	8184	10684	8554	8028	7868	9042	9486	8040	245210	3398	263.826	6824	663.891	6635.33	2112.09	4326.33	1468.35	9468.67	1292.51	8503	648.48
K03769	7584	5612	5680	7466	6640	7686	8056	9386	7792	8392	8954	8020	8288	5926	5082	6100	6066	5212	4588	3716	4748	4430	4128	3228	9690	8926	9090	8452	8084	11162	6292	5636	5828	6464	6578	5922	244904	6292	1119.42	8043.56	809.927	6112.33	1152.63	4139.67	577.258	9234	1093.14	6120	378.526
K00975	6488	4916	5262	6028	5352	6500	6706	7282	7304	6606	6996	6644	8862	6392	5374	6316	6436	5770	5198	4492	5198	6226	4558	3634	8844	8544	8824	8002	7934	9906	8236	7714	7456	8602	8646	7624	244872	5555.33	826.032	6602	614.961	6525	1218.66	4884.33	874.139	8675.67	719.068	8046.33	518.005
K03531	6312	4800	5172	6720	6136	7250	7124	8050	6768	7470	7706	7378	8262	6482	5506	7076	7290	6200	5330	4246	5198	5770	4904	4186	7202	6976	7018	8592	8078	9606	7746	6898	7134	7738	8836	7176	244336	5428	787.838	7178	574.038	6802.67	958.044	4939	625.94	7912	1052.52	7588	700.989
K03977	6180	4882	4952	6468	5518	7048	6872	7508	6892	7030	7782	7144	8894	6542	5554	6822	7490	6006	5258	4172	5262	5654	4838	3822	7992	7510	8050	8276	8186	10402	7982	6910	7440	7788	8260	6938	244324	5338	730.033	6918	646.182	6884.67	1188.94	4834.33	706.79	8402.67	1014.91	7553	555.618
K01912	7066	5702	5488	7774	6694	7738	8070	9194	8050	9560	9992	8282	8866	6448	4984	6876	7388	6508	5564	4340	5366	4550	4498	3456	6132	5526	5838	9166	6648	9760	6368	5882	6038	6746	7416	6324	244298	6085.33	855.996	8372.67	1030.15	6845	1273.95	4629	761.61	7178.33	1817.61	6462.33	554.045
K00108	6234	4170	4590	9204	7812	8918	8926	10652	7986	8752	8804	9140	8206	5876	5026	5726	4960	5294	4434	3708	5040	6228	5426	4750	6168	6042	6260	4922	6902	7070	7634	6708	7096	8090	9064	6892	242710	4998	1090.81	8910.44	811.619	5848	1212.19	4931	861.93	6227.33	762.639	7580.67	886.933
K07025	5884	4618	4816	6882	5928	7540	7348	8168	7820	7388	7886	7334	9452	6884	5588	7086	7004	6022	4996	4298	5158	5124	3596	2800	8450	7806	8048	8196	7674	10498	6716	6102	6488	7440	8524	6816	242378	5106	681.002	7366	657.07	7006	1340.39	4328.67	963.353	8445.33	1042.8	7014.33	860
K07402	7668	5208	5688	6830	5914	7244	7230	8178	7204	7674	7802	7428	8814	6398	5508	6048	5578	5126	4372	3842	4992	6310	4252	3944	9036	8552	8932	9058	8128	11258	6622	6056	6014	6558	6674	6004	242144	6188	1303.99	7278.22	645.564	6245.33	1334.33	4618.67	922.351	9160.67	1087.57	6321.33	327.518
K00077	5730	4514	4488	8642	7724	9376	9542	10420	8570	9552	10272	9060	8090	6244	4804	5270	4512	5094	4902	4150	5138	4752	4338	3634	7880	7084	7856	8016	7196	10390	5984	5442	5392	5962	6522	5472	242014	4910.67	709.683	9239.78	851.589	5669	1324.28	4485.67	553.104	8070.33	1200.27	5795.67	443.505
K04042	6210	4840	4496	5922	5320	6336	6752	7172	6864	6886	6992	6420	8110	6070	5126	5864	5752	5326	5210	4464	5378	6412	4418	3758	8418	7972	8294	8030	8040	10534	8162	7678	7796	8648	10144	7878	241692	5182	906.737	6518.22	591.126	6041.33	1071.9	4940	930.345	8548	988.309	8384.33	929.171
K00604	6040	4922	4740	6842	5948	7286	7406	8262	7206	7830	8302	7638	8316	6246	4974	6262	6126	5320	4982	4320	5090	6264	4630	3670	8248	7510	7912	8244	7828	10402	7408	6570	6592	7356	8196	6788	241676	5234	703.923	7413.33	730.319	6207.33	1163.28	4826	870.938	8357.33	1039.42	7151.67	629.588
K00847	4748	3666	3612	5672	5120	6442	6378	6830	6604	5844	6328	6188	7172	5788	4748	5564	5298	4956	5466	4840	6098	7086	4504	3982	10894	10198	10806	10616	10288	13330	7330	6618	6510	7302	8038	6576	241440	4008.67	640.85	6156.22	526.968	5587.67	864.726	5329.33	1134.14	11022	1163.83	7062.33	603.33
K11749	6252	4822	4814	6330	5340	6460	6628	7564	6484	6700	7066	6808	8408	6318	5660	6734	6966	5790	4896	4438	5430	6320	4934	3990	8120	7552	7814	8914	8982	11124	7548	6684	6952	7430	8156	6798	241226	5296	827.93	6597.78	601.458	6646	1002.73	5001.33	809.741	8751	1298.06	7261.33	557.626
K03100	6454	4634	4908	6118	5260	6392	6190	7214	6096	6944	7100	6666	8464	6234	5034	7082	6818	5550	4610	3960	4908	6106	4590	3440	7958	7500	8000	9276	8658	11050	7902	7332	7558	8116	8942	7688	240752	5332	981.291	6442.22	614.303	6530.33	1217.71	4602.33	907.554	8740.33	1290.49	7923	568.117
K00645	5212	4476	4022	5882	5202	6522	6274	6930	6586	6484	6840	6422	7650	6114	5192	5838	6218	4926	5132	4586	5424	6512	4474	3668	8938	8234	8358	9236	8878	11290	8234	7260	7548	8372	9570	7664	240168	4570	600.543	6349.11	527.686	5989.67	960.725	4966	969.402	9155.67	1111.04	8108	831.006
K07675	6078	4964	5094	6252	5946	8122	7950	8396	8992	8042	9130	8488	10256	8250	6526	7344	6892	6808	4432	3768	4512	3546	3110	2656	7374	6644	6570	7660	6164	9584	6506	6054	6012	7110	8104	6406	239742	5378.67	609.118	7924.22	1112.31	7679.33	1399.04	3670.67	728.887	7332.67	1232.81	6698.67	794.234
K00261	6792	4698	5368	8002	6766	8158	8274	8922	7904	8474	9106	8092	8460	7170	5624	6050	6106	5456	5132	4382	5118	5500	4864	4340	7980	7374	7684	6332	6816	8148	6132	5608	5466	5876	7026	6180	239380	5619.33	1069.39	8188.67	672.507	6477.67	1140.4	4889.33	456.921	7389	701.169	6048	555.495
K01929	5802	4574	4784	6082	5328	6798	6846	7162	6696	6818	7264	6978	7752	6112	5148	5998	6812	5376	5016	4484	5240	6036	4490	3636	8304	7524	8018	9118	8268	10800	7850	7214	7146	7826	8668	7294	239262	5053.33	656.811	6663.56	602.706	6199.67	960.987	4817	814.502	8672	1163.75	7666.33	579.059
K01657	6114	4584	4654	6034	5490	6318	6600	7136	6520	6820	6948	6688	7854	6102	5260	6436	6212	5488	5240	4326	5332	6620	4924	4404	7854	7564	8380	7256	8196	9876	7808	7346	7456	8144	9350	7686	239020	5117.33	863.848	6506	502.916	6225.33	915.189	5141	835.249	8187.67	922.586	7965	734.166
K07482	5372	5308	4196	9642	8048	9230	9700	11150	9140	9180	9764	8986	5402	3812	3164	2964	2368	3602	4556	3892	4996	4384	5186	4372	8112	7732	8630	6128	9236	7910	6616	5846	6086	7214	10266	6716	238906	4958.67	661.263	9426.67	827.75	3552	1038.34	4564.33	467.85	7958	1049.84	7124	1613.41
K01091	6230	5316	5160	5924	5180	6568	6456	7390	6928	6348	7076	6776	7280	5892	5050	5510	5744	4962	5208	4450	5306	6244	4930	3874	8924	8362	8326	9696	8244	11306	7440	6394	6648	7248	9314	7130	238834	5568.67	578.018	6516.22	659.991	5739.67	840.119	5002	807.427	9143	1193.15	7362.33	1032.48
K02066	6778	4918	5106	7522	6196	7216	7178	8342	6794	7654	8174	7476	6914	5538	4756	5546	6352	5124	5486	4334	5322	4558	5120	4042	8404	8174	8110	9450	8326	11452	6506	5978	6180	6612	6858	6164	238660	5600.67	1023.92	7394.67	658.725	5705	796.445	4810.33	582.258	8986	1303.65	6383	330.572
K01950	5180	4520	4388	5554	5258	6024	6092	6814	6278	6310	7168	6460	7712	5988	5290	5830	6390	5116	4880	4336	5630	6314	4538	3828	8512	7880	8254	9384	9262	10944	8076	7452	7568	8206	9338	7424	238198	4696	424.321	6217.56	585.699	6054.33	935.941	4921	908.666	9039.33	1098.64	8010.67	728.9
K03639	5832	4730	4664	6440	5476	6806	6856	7746	6754	7094	7758	6974	7956	5732	5128	6408	6456	5736	5154	4248	5302	5576	4428	3724	7478	7270	7560	7926	7570	10018	8020	7012	7178	8094	9110	7352	237566	5075.33	656.123	6878.22	685.765	6236	976.531	4738.67	715.233	7970.33	1025.32	7794.33	782.212
K07478	5900	4726	4758	5726	5038	6152	6252	6966	6372	6610	6916	6578	8024	6502	5180	6408	7094	5248	4944	4666	5342	6076	4720	3944	7994	7628	7980	8884	7980	10502	7874	7166	7250	7896	8914	7348	237558	5128	668.763	6290	606.94	6409.33	1090.36	4948.67	716.541	8494.67	1068.88	7741.33	654.797
K01113	4328	4066	3398	6934	5904	6928	6866	8414	6438	6456	6836	6396	8350	6144	5374	6202	5780	5650	5234	4834	6096	7024	5314	4180	8796	8840	9034	7714	9544	10354	6770	5996	6096	7018	7800	6406	237514	3930.67	479.543	6796.89	694.65	6250	1074.41	5447	995.213	9047	876.147	6681	672.417
K20974	6134	5528	5080	5686	5206	6826	6528	6740	7136	5542	6066	6382	8450	6640	6810	7690	9336	6744	4888	4226	4568	6608	4472	4030	7842	7808	7490	9836	8936	10658	6286	5948	5782	6448	6276	6264	236890	5580.67	528.97	6234.67	651.212	7611.67	1097.44	4798.67	933.85	8761.67	1276.95	6167.33	249.238
K03979	5880	4492	4632	5198	4382	6024	5788	6424	5764	6040	6446	5848	7586	6140	5022	6162	6726	5164	4868	4500	5378	5934	4114	3268	9484	8690	9034	10396	8852	13018	7472	7114	6628	8088	8918	7230	236704	5001.33	764.161	5768.22	640.532	6133.33	963.019	4677	942.498	9912.33	1640.27	7575	813.115
K03292	6356	5532	5286	4008	3734	5120	4918	5444	5328	4302	5008	4710	8624	6660	5660	7930	9022	5424	5734	4898	5986	7330	4782	4228	8468	7988	8518	9234	9052	11278	8010	7548	7484	8064	7916	7082	236666	5724.67	560.415	4730.22	594.665	7220	1529.4	5493	1107.74	9089.67	1160.86	7684	380.894
K09017	4726	3822	3776	7146	6570	7808	7240	8734	7330	7538	7552	7724	9274	6632	5572	6812	6932	5820	3888	3380	4464	4844	3338	2516	8224	7724	8176	9764	8546	10864	6510	5794	6032	6874	8396	6290	236632	4108	535.698	7515.78	586.986	6840.33	1313.4	3738.33	843.12	8883	1190.92	6649.33	934.082
K01939	6210	4712	4768	6112	5288	6310	6172	7290	6434	6868	7248	6788	8326	6168	5274	6516	6720	5976	5066	4194	4882	5752	4500	3892	7288	6988	7362	8038	7836	9632	7824	7228	7172	8246	9528	7470	236078	5230	849.167	6501.11	629.433	6496.67	1026.72	4714.33	666.551	7857.33	949.502	7911.33	887.871
K16264	5446	4742	4660	6478	5566	6496	6554	7388	6216	6840	6932	6660	6990	5018	4252	6248	7064	5166	4670	3864	4988	6160	4598	3622	7686	7480	7720	7824	8182	10268	7928	7024	7588	8260	11592	7664	235834	4949.33	432.076	6570	503.574	5789.67	1150.97	4650.33	902.444	8193.33	1042.21	8342.67	1643.53
K02454	6760	5708	5522	6642	5932	6820	6924	7810	6238	7766	8294	7150	8024	6546	5560	5824	6452	5018	5548	4704	5550	5038	6022	5480	7440	7454	7442	8926	7988	9558	5700	5536	5728	5838	6582	5956	235480	5996.67	667.576	7064	773.833	6237.33	1044.02	5390.33	458.822	8134.67	905.456	5890	367.038
K16899	5506	4680	4538	6560	5696	6948	6950	8320	6396	6978	7516	6884	8844	6246	5498	6848	7818	5722	4736	3852	4940	6606	4688	3512	8272	7752	8018	9364	9290	10918	6172	5422	5618	6012	6344	5656	235120	4908	522.727	6916.44	726.619	6829.33	1294.26	4722.33	1078.83	8935.67	1176.63	5870.67	359.457
K02493	5970	4560	4648	6094	5326	6390	6434	7130	6620	6892	7012	7050	8018	6086	5084	6578	6502	5844	4456	3914	4740	5776	3636	2966	7702	6918	7126	8336	7146	9808	8222	7322	7472	8702	10620	7718	234818	5059.33	789.887	6549.78	577.373	6352	978.343	4248	974.652	7839.33	1093.58	8342.67	1226.37
K06941	5956	4612	4914	6478	5322	6712	6700	7356	6250	6996	7010	6724	8332	6534	5520	6246	6504	5748	4490	3918	4966	5728	4326	3406	7720	7518	7698	8472	7744	10516	7344	6500	6872	7670	8876	7116	234794	5160.67	705.136	6616.44	581.228	6480.67	994.542	4472.33	810.738	8278	1145.15	7396.33	827.523
K06877	4356	3790	3650	5366	4914	5830	5874	6246	6246	5828	6584	5672	7084	6290	5082	5552	5582	5056	5168	4648	5734	5166	3646	3132	7792	7696	7698	7844	6630	10262	10188	8994	9450	10888	11616	9130	234684	3932	373.807	5840	499.373	5774.33	782.674	4582.33	999.451	7987	1203.64	10044.3	1048.33
K23753	5904	4312	4732	5632	4832	5986	6310	7086	5832	6378	6442	6480	6994	5216	4352	5164	5274	4356	4574	4244	5414	5934	4292	3594	8254	7780	8482	6910	7890	9888	9324	8540	8572	9838	11024	8560	234396	4982.67	825.071	6108.67	638.938	5226	964.66	4675.33	853.512	8200.67	986.75	9309.67	991.647
K00970	5650	4410	4688	5186	4978	5716	5936	6488	6302	5824	6102	6018	7446	5786	5400	5796	6410	4934	5166	4652	5532	6348	4266	3388	8360	7830	8286	8286	8740	10582	8528	7518	7586	8746	9846	7604	234334	4916	650.683	5838.89	491.08	5962	875.685	4892	1031.13	8680.67	975.354	8304.67	921.588
K00259	5662	4958	4846	5758	5058	5990	5866	6566	6232	6312	6306	6490	8012	6626	5226	6384	6102	5532	5128	4260	5404	5906	4480	3618	7562	7522	7670	7988	8080	10096	8392	7614	7838	8634	8604	7446	234168	5155.33	442.345	6064.22	465.312	6313.67	982.411	4799.33	835.076	8153	978.625	8088	520.793
K08307	7160	5796	6114	4554	4410	5588	5880	5938	6492	5714	6606	5920	5690	4728	4404	5080	6614	4632	6192	5016	5678	4860	5052	4042	10564	9658	10050	12192	10028	13758	6124	5898	5860	5624	5942	6234	234092	6356.67	713.645	5678	755.922	5191.33	828.549	5140	735.292	11041.7	1603.46	5947	213.552
K15521	4382	3278	3356	5758	4936	6548	6412	6942	6906	6440	7018	6438	8072	6620	4950	5796	5278	5340	5030	4604	5452	6530	3306	2798	9214	8728	8626	8586	8322	11004	8148	7200	7124	8514	8766	7642	234064	3672	616.114	6377.56	662.169	6009.33	1164.31	4620	1382.39	9080	986.747	7899	685.155
K07267	5094	3986	3936	4946	3742	4518	4588	6004	4138	4590	4534	4602	6566	4624	4002	3814	3346	2716	6142	5132	6344	7810	5258	4304	12788	12498	12888	9664	10952	13274	7696	7194	7454	7938	9356	7610	234048	4338.67	654.615	4629.11	616.871	4178	1333.76	5831.67	1218.6	12010.7	1402.5	7874.67	766.889
K18979	5794	4572	4712	5698	5010	6252	6476	7034	6860	6390	7100	6174	7606	6232	5240	6404	7270	5530	6370	4742	5952	5622	4500	3676	9012	7942	8258	9852	8314	11806	6284	5890	5876	6424	6870	6204	233948	5026	668.781	6332.67	667.693	6380.33	931.639	5143.67	1011.51	9197.33	1449.59	6258	370.686
K03665	5884	4442	4810	5912	5242	6392	6188	7388	6310	6696	7110	6572	7916	5946	5322	5936	6662	5472	5014	4030	4802	5956	4720	4186	7670	7520	7558	8502	7718	10478	7370	6876	6796	7616	8704	6996	232712	5045.33	749.251	6423.33	634.898	6209	958.404	4784.67	686.589	8241	1153.97	7393	714.183
K06196	5124	4312	4368	6020	5194	6502	6400	7144	6578	6564	7100	6874	7782	5982	4920	6838	6878	5762	4144	3856	4644	5570	3670	3052	7634	7272	7552	7286	7252	9328	8848	7700	7650	9114	9610	7910	232434	4601.33	453.508	6486.22	598.866	6360.33	1009.26	4156	869.793	7720.67	803.662	8472	828.987
K05555	6598	4858	4856	7994	6998	8108	8076	9212	7772	8480	9016	7816	7988	6088	4964	5704	4800	5424	4784	4018	5142	4888	4650	3856	8386	7606	8344	7826	7344	9254	5554	5324	5102	5288	5096	5026	232240	5437.33	1005.17	8163.56	670.65	5828	1158.88	4556.33	508.701	8126.67	686.939	5231.67	196.528
K00052	5584	4626	4486	7010	6000	7038	6968	8308	6656	7666	8208	7542	7844	5656	5158	5542	4972	5238	4934	4478	5218	6130	5244	4494	7280	6952	7260	6770	7194	8898	7234	6542	6738	7356	8186	6708	232118	4898.67	597.63	7266.22	740.817	5735	1063.34	5083	612.454	7392.33	763.897	7127.33	609.012
K23535	6394	4806	5212	6480	5748	7318	7398	8002	8162	7154	7580	7266	9770	7238	5800	6606	6010	5596	4506	3932	4786	4970	3458	3162	7456	7168	7340	6748	6470	8964	6784	6044	6400	7264	7654	6296	231942	5470.67	824.995	7234.22	740.676	6836.67	1556.66	4135.67	735.518	7357.67	870.162	6740.33	617.909
K00425	3408	3046	3000	6296	5520	6354	6540	7158	6700	6542	7068	6944	7110	5568	5034	5830	6242	5338	4490	4100	4880	4896	4234	3264	8620	8316	8302	10458	8714	12176	7318	6786	6872	8080	9730	6854	231788	3151.33	223.467	6569.11	497.045	5853.67	741.499	4310.67	607.402	9431	1567.13	7606.67	1148.53
K03313	6702	4936	4906	7392	6698	8248	8114	9086	8124	8540	8880	8594	7072	5586	4504	5466	4616	5650	4380	3486	4504	4524	4288	3556	7162	6998	7334	6762	7150	8456	6948	6080	6228	7034	7326	6348	231678	5514.67	1028.37	8186.22	745.056	5482.33	924.536	4123	474.657	7310.33	593.135	6660.67	507.295
K01200	2870	2662	2112	3762	3684	4584	4636	4862	5472	3868	4380	4730	10530	7988	6488	6778	7630	5086	4982	4480	6174	7060	4186	3542	8654	8374	8052	7388	8544	9526	9636	9270	9166	10194	11188	9116	231654	2548	391.648	4442	586.124	7416.67	1831.23	5070.67	1315.37	8423	706.524	9761.67	806.297
K03325	6698	5342	5294	4390	4072	5272	5376	5712	6032	5764	6046	5736	7810	5822	4952	6868	6966	5606	5816	4904	5372	5036	4270	3350	8468	7904	8114	9522	8234	11748	7420	7082	6918	7790	8716	7202	231624	5778	797.105	5377.78	703.178	6337.33	1055	4791.33	872.8	8998.33	1461.5	7521.33	658.586
K10563	5478	4228	4062	6216	5432	6616	6134	7142	6118	6630	6680	6302	7952	5782	5036	5286	4574	4790	4530	4194	5242	5816	4360	3672	8020	7650	7928	7370	8048	9822	8386	7428	7642	9156	9828	7746	231296	4589.33	774.071	6363.33	480.518	5570	1239.77	4635.67	770.935	8139.67	863.705	8364.33	953.976
K07112	6410	4710	4728	5910	4932	5832	6120	6422	6240	5796	6372	5722	8764	6470	5410	6470	7730	5376	5406	4436	5470	6136	5070	3824	8366	7766	8124	9712	8500	11310	6028	5616	5556	6432	7362	6002	230530	5282.67	976.341	5927.33	452.326	6703.33	1329.95	5057	820.087	8963	1324.91	6166	666.59
K12573	6294	5066	5022	6692	5610	7128	6408	7736	6030	6914	7306	6992	7792	5858	5194	6620	7648	5756	5124	4128	4808	6538	5338	4684	7462	6424	7118	8118	8224	9046	5996	5792	5802	6162	7590	6064	230484	5460.67	722.023	6757.33	656.46	6478	1064.89	5103.33	815.856	7732	925.031	6234.33	679.919
K23997	5130	3976	4176	5466	4516	5644	5770	6152	5536	5968	6398	5944	7032	5758	4618	6108	6596	5134	5218	4142	5242	5698	4126	3388	8474	7676	8298	9320	8682	10962	8096	7226	7812	8588	9720	7616	230206	4427.33	616.689	5710.44	537.753	5874.33	900.621	4635.67	882.66	8902	1141.74	8176.33	884.158
K01945	6056	4592	4726	5774	5086	6010	6190	7042	5910	6794	6844	6258	7482	5538	4634	5880	6384	5060	5086	4124	4938	6316	4856	4240	7614	7648	7630	8504	8302	10270	7392	6686	6888	7828	8350	6678	229610	5124.67	809.336	6212	614.55	5829.67	1014.6	4926.67	784.416	8328	1025.91	7303.67	681.658
K00800	5928	4694	4880	5514	4908	6106	6100	6534	6164	6288	6710	6562	7584	5704	4974	6224	6792	5022	4710	4182	4856	6338	4370	3704	8208	7834	8006	8710	8166	10400	7372	6582	6928	7534	7642	6776	229006	5167.33	665.289	6098.44	567.628	6050	1026.48	4693.33	902.934	8554	950.896	7139	435.858
K11942	7666	5844	6078	4340	3876	4506	4740	4410	4812	4352	4530	4490	8080	5730	5596	6184	7098	4652	5914	5096	6050	7292	6106	5738	7910	7572	7370	7272	8366	9958	8218	7692	7774	7836	7986	7520	228654	6529.33	991.311	4450.67	269.039	6223.33	1209.94	6032.67	716.917	8074.67	1005.23	7837.67	242.01
K11754	5446	4540	4506	6050	5132	6482	6216	6864	6134	6452	6598	6536	7602	5860	4764	5824	6402	5048	5052	4060	5348	6182	4420	3684	7754	7426	7504	8618	7882	10264	7264	6742	6592	7648	8304	6802	228002	4830.67	533.165	6273.78	496.736	5916.67	1016.95	4791	917.682	8241.33	1077.78	7225.33	656.901
K19304	6492	4918	5052	4708	4250	5374	5276	5964	5488	5494	5696	5356	8136	5692	5264	6666	7648	4874	4624	3912	5084	5450	4502	3590	8820	8298	8324	10032	8882	11392	7392	6718	6858	7096	7758	6546	227626	5487.33	872.643	5289.56	516.22	6380	1323.63	4527	696.908	9291.33	1206.11	7061.33	451.814
K01925	5480	4386	4638	5566	4826	6098	6184	6874	6170	6490	6828	6480	7358	5786	4752	5986	6046	5056	4932	4252	5248	5984	4454	3548	8196	7482	7440	8772	7968	10346	7424	6730	6746	7582	8568	6792	227468	4834.67	572.903	6168.44	642.611	5830.67	913.112	4736.33	846.544	8367.33	1087.33	7307	720.043
K19701	7666	5428	6404	4992	4504	5832	5902	6266	5904	5616	6094	5410	8568	6796	5330	6998	7716	5288	4684	4270	5042	4924	3864	3172	8000	7632	7216	10114	8592	10784	6368	6118	6056	6590	7058	6252	227450	6499.33	1122.04	5613.33	562.436	6782.67	1299.95	4326	713.683	8723	1427.15	6407	371.365
K01679	5688	4250	4738	6782	5960	6620	7170	7954	6568	7712	7614	7592	8430	6440	5208	6334	6014	5760	4862	4208	5084	5420	5318	4346	6754	6472	6716	6946	7126	9120	6490	5892	5934	6554	7364	6004	227444	4892	731.265	7108	664.134	6364.33	1104.42	4873	502.36	7189	971.475	6373	563.697
K01782	5610	4420	4722	5568	4426	5298	5094	6168	4908	5518	5792	5310	7062	5412	4822	5854	5554	5060	4974	4408	5748	7002	5248	4454	7254	6794	6962	6326	7516	8708	9332	8542	8800	9190	10756	8534	227146	4917.33	618.58	5342.44	507.285	5627.33	791.432	5305.67	971.357	7260	817.385	9192.33	833.646
K01848	6918	5072	5456	7308	6592	7692	7792	8504	7278	9486	9950	8306	7920	6618	5432	5386	4320	5472	4328	3744	4542	4138	3748	3530	6048	5272	5674	8310	6112	8996	6396	5712	5992	6432	6682	5972	227130	5815.33	974.048	8100.89	1083.25	5858	1244.84	4005	392.475	6735.33	1530.94	6197.67	362.746
K21147	5956	4486	4696	5582	4932	6272	6108	6532	6316	6592	6902	6388	8870	6476	5398	6140	5978	5024	4564	4056	4848	5576	3842	2946	8684	7976	8306	7616	7426	10052	7302	6598	6586	7136	7778	6738	226678	5046	795.047	6180.44	592.183	6314.33	1356.89	4305.33	905.607	8343.33	953.146	7023	471.901
K00703	6476	5010	5310	5198	4378	5416	5838	6182	6350	5916	6562	6116	7722	6008	5120	5440	6606	4742	5482	4660	5050	6124	4652	3892	9112	8428	9088	9592	8228	11160	6322	6064	5940	6248	6202	5816	226450	5598.67	774.458	5772.89	677.233	5939.67	1093.74	4976.67	769.325	9268	1051.53	6098.67	194.491
K01142	5864	4390	4626	5272	4832	6006	5902	6486	5778	5612	5968	5954	7730	5566	5024	5776	6166	4532	4726	3922	4852	6616	4702	3682	7772	7240	7286	7224	7448	9546	8474	7664	7794	8608	9400	7894	226334	4960	791.73	5756.67	475.672	5799	1106.72	4750	1031.64	7752.67	902.146	8305.67	657.315
K00974	5474	4876	4524	5540	5028	6064	6448	6680	6696	6432	7588	6330	7372	6450	5610	6312	7144	5278	5380	4652	5440	4920	4006	3540	8560	7936	8052	10480	7932	11812	5582	5286	5324	5560	6250	5546	226104	4958	480.279	6311.78	728.905	6361	822.487	4656.33	758.485	9128.67	1634.84	5591.33	346.889
K20469	3166	2562	2464	4122	3810	4842	4800	4604	5188	4650	4984	5214	7364	5702	4632	4936	3432	4770	4356	4110	5710	7220	3292	2500	8504	8294	8898	6756	8314	9510	11452	9950	10178	11944	13074	10000	225304	2730.67	380.181	4690.44	467.739	5139.33	1312.7	4531.33	1702.28	8379.33	917.576	11099.7	1274.01
K06919	3618	3066	2718	5754	5164	6898	6062	6950	5266	5544	5860	5420	6316	4496	3546	5500	9244	3520	4016	3648	3928	6718	3934	3224	10294	9986	10296	7846	10722	10584	7462	6948	6874	7756	8678	7282	225138	3134	453.837	5879.78	656.198	5437	2163.61	4244.67	1246.13	9954.67	1064.33	7500	663.139
K00928	5692	4484	4750	6294	5702	6534	6250	7652	6156	6958	6820	6980	7290	5182	4814	6258	6784	5964	4702	3998	4618	5458	4540	3860	6800	6360	6724	7232	7424	8764	7140	6644	6866	7390	8512	6830	224426	4975.33	634.742	6594	575.693	6048.67	938.949	4529.33	571.057	7217.33	847.074	7230.33	680.164
K16147	3976	3212	3486	6784	5912	6710	7322	7810	6760	7426	7430	7522	6554	5342	4454	4754	5006	5112	4822	4234	4856	5616	4180	3126	7866	7740	7474	7524	7470	9778	7308	6898	6780	7776	8154	6876	224050	3558	387.056	7075.11	583.092	5203.67	728.589	4472.33	840.514	7975.33	897.479	7298.67	559.951
K15022	6952	5130	5450	6518	6036	7214	7534	8220	7786	7526	8428	7374	7226	5538	4578	4792	4772	4530	5898	4510	5624	5232	5198	4456	6496	6218	6248	7954	7338	9328	5834	5734	5540	5652	5484	5574	223922	5844	972.804	7404	757.096	5239.33	1038.76	5153	580.412	7263.67	1221.3	5636.33	130.558
K09118	3632	3024	2856	6116	5348	6764	6332	6822	6612	6294	6404	6748	6868	5110	4416	4484	3392	4456	5000	4230	4810	6774	4150	3686	7572	7326	7950	8100	7990	9962	8568	7604	7712	9312	9706	7388	223518	3170.67	408.261	6382.22	457.851	4787.67	1159.3	4775	1088.25	8150	934.292	8381.67	968.988
K07391	5692	4412	4308	5124	4532	5540	5636	6126	5442	5644	6392	5876	7720	5960	5096	5908	6344	5200	5072	4054	4900	6208	4226	3694	7780	7816	7908	8814	7932	10128	7108	6628	6950	7314	8890	6764	223138	4804	770.787	5590.22	545.235	6038	952.402	4692.33	906.214	8396.33	932.078	7275.67	827.404
K03521	5550	4660	4822	5722	5062	6204	6412	6666	6860	6700	6730	6378	7102	5368	4624	4858	4420	4764	5190	4318	5012	4826	4218	3618	7770	7386	7706	9686	8402	12182	6468	6022	6274	6974	7468	6348	222770	5010.67	474.048	6303.78	579.536	5189.33	989.18	4530.33	588.145	8855.33	1823.19	6592.33	531.834
K01886	5994	5320	4980	5924	5290	6436	6578	7196	6626	6496	7296	6598	7398	6078	5280	5744	6366	4978	4760	4300	4952	5368	4650	4050	7972	7690	7762	9342	8144	10588	5322	4976	5200	5262	6170	5474	222560	5431.33	516.087	6493.33	607.164	5974	862.416	4680	468.173	8583	1151.84	5400.67	410.677
K09667	6082	4352	4790	7452	6308	6672	6734	8292	5644	7180	7454	6438	8586	5858	4868	5236	5060	3642	6896	5016	6836	7132	7002	5798	6270	5938	5976	5466	7714	7050	6230	5834	6074	5390	5222	5912	222404	5074.67	899.445	6908.22	778.465	5541.67	1658.68	6446.67	848.426	6402.33	828.437	5777	393.112
K02341	4746	3896	4020	4812	4252	5168	4994	5710	5340	5464	5732	5602	7072	5250	4606	5584	5692	4612	4572	4142	5332	6276	3478	2734	7596	7194	7808	7812	8000	9612	9752	8306	8354	9524	10720	8270	222034	4220.67	459.157	5230.44	484.56	5469.33	912.112	4422.33	1273.33	8003.67	834.688	9154.33	1008.7
K00117	5482	4216	4336	8828	7064	8156	8724	11090	6774	9326	9178	8416	10220	7320	5808	6454	5474	5382	3576	3786	4346	5430	4890	3916	5604	5376	5518	5096	6700	6924	4766	4128	4580	4538	5754	4788	221964	4678	698.865	8617.33	1277.23	6776.33	1835.01	4324	715.47	5869.67	753.338	4759	542.21
K13598	6818	4880	5434	5876	5282	5840	5922	7172	5710	6882	7284	6206	7562	5340	4968	6022	7366	5036	5004	3898	4504	5108	5066	4102	8022	7398	7760	10696	8612	11248	5376	5056	5190	5230	4996	4876	221742	5710.67	998.183	6241.56	703.93	6049	1159.47	4613.67	526.752	8956	1620.45	5120.67	179.745
K02836	5964	4662	4546	5732	4878	5696	5564	6358	6128	6064	6660	6212	7790	6064	5130	6158	6162	5200	4598	3996	4584	5798	4602	3916	6960	6316	6620	7966	7598	9156	7498	6820	6894	7520	8674	6992	221476	5057.33	787.336	5921.33	522.818	6084	960.621	4582.33	673.241	7436	1040.42	7399.67	693.683
K07516	7110	5454	5628	6166	5558	6854	6994	7412	6920	7432	7512	6900	7986	6058	4950	6142	6258	5302	4818	4102	4828	5716	4310	4032	7252	6810	6926	7502	7036	9166	5502	5102	5074	5458	5928	5072	221270	6064	910.031	6860.89	638.065	6116	1052.93	4634.33	631.287	7448.67	876.599	5356	341.643
K00927	5468	4412	4588	5716	4892	5828	6108	6634	5856	6340	6616	6402	7836	6134	4992	6424	6674	5474	4682	3872	4798	5566	4168	3732	7340	6816	7026	8162	7618	9476	6834	6566	6546	7154	7856	6534	221140	4822.67	565.761	6043.56	549.073	6255.67	992.316	4469.67	685.156	7739.67	972.65	6915	520.055
K01867	5700	4524	4642	5778	4982	6114	6194	6770	6318	6510	6758	6472	7618	5950	4784	6262	6596	5440	4604	3942	4892	5630	4638	4020	6808	6402	6538	7446	6940	8450	7610	6718	6630	7524	7952	6782	220938	4955.33	647.593	6210.67	557.706	6108.33	976.332	4621	618.764	7097.33	755.789	7202.67	560.444
K03892	5070	3796	4026	6938	5864	7472	7536	8096	7378	7462	7642	7550	7866	6152	4950	6130	5606	5722	4180	3584	4590	4954	4138	3284	6912	6430	6918	6574	6548	8554	6542	5754	5938	6634	7666	6124	220580	4297.33	678.959	7326.44	624.253	6071	982.521	4121.67	617.504	6989.33	792.386	6443	688.987
K01736	4928	3984	3892	5650	5018	5954	6234	6682	6086	6350	6714	6136	7964	6002	5196	6234	6038	5318	4472	4028	5050	5304	4158	3728	7516	6866	7374	7318	7380	9336	7296	6562	6302	7750	8346	6750	219916	4268	573.425	6091.56	523.398	6125.33	993.055	4456.67	612.236	7631.67	864.001	7167.67	779.064
K03799	5088	4512	4028	6560	5382	6420	6484	7366	5930	7148	7414	6720	7034	5184	4474	5142	4886	4790	4886	4292	4706	6268	4904	4126	7344	7422	7856	7414	7982	9118	6942	5992	6058	6542	7332	6010	219756	4542.67	530.665	6602.67	665.57	5251.67	910.487	4863.67	757.64	7856	671.474	6479.33	562.195
K20034	6050	5022	4742	8820	7716	8194	8644	9532	7364	9394	8550	7908	8194	5980	4912	5328	4628	4834	4496	3588	4486	5496	6022	5698	4978	4976	5220	4012	5562	5602	5440	5054	5192	5858	6794	5382	219668	5271.33	688.724	8458	735.125	5646	1337.12	4964.33	925.422	5058.33	580.247	5620	636.789
K02338	6168	4416	5152	6204	5304	5896	6328	7002	6326	6482	6794	6342	7914	5486	4688	5776	6622	4796	4706	4130	4752	5858	4400	3792	7178	6758	6966	7350	6836	8978	6410	6060	6132	6824	8044	6358	219228	5245.33	879.721	6297.56	492.136	5880.33	1220.63	4606.33	711.397	7344.33	829.686	6638	739.18
K00616	4590	3664	3784	6272	5614	6874	6526	7486	6782	6972	7152	6804	8270	6388	4850	5418	5318	5114	4320	3748	4318	4926	3802	2922	8440	7598	7764	8090	7570	10512	6106	5592	5828	6472	7426	5910	219222	4012.67	503.573	6720.22	540.032	5893	1276.41	4006	681.994	8329	1119.34	6222.33	659.553
K00790	5580	4534	4482	5742	4802	6160	6118	6658	6012	6690	6888	6374	7448	5696	4878	5962	6450	5418	4534	3606	4698	5212	4364	3556	7312	6968	7322	7694	7380	9468	6734	6426	6132	7366	8076	6454	219194	4865.33	619.465	6160.44	627.22	5975.33	892.975	4328.33	644.881	7690.67	900.776	6864.67	725.757
K14340	2718	2248	2236	5238	4288	5790	5500	5250	6286	4234	5086	4612	9372	7514	5426	4952	4708	3404	4250	4312	4988	5112	2302	1860	12446	11778	11102	9886	8176	12750	6762	6308	6334	7398	7288	7102	219016	2400.67	274.884	5142.67	681.496	5896	2164.9	3804	1385.99	11023	1731.01	6865.33	473.71
K10027	4536	3932	3748	4140	3906	4864	4790	5294	5330	4730	5518	4758	8176	6268	5038	6320	7106	4978	4606	4264	5588	6212	3832	3152	8270	7936	7994	7384	8024	9670	8498	7464	7314	8728	9134	7490	218992	4072	412.233	4814.44	534.355	6314.33	1225.52	4609	1129.04	8213	771.2	8104.67	776.686
K00325	6982	5370	5262	5742	5102	5604	5668	6440	5246	6514	6426	6296	7158	5286	4860	5616	5556	4894	4974	3962	4888	6212	5312	5018	6382	5950	6352	6252	7056	7894	7508	6810	7034	7822	8300	6854	218602	5871.33	963.38	5893.11	539.975	5561.67	844.437	5061	725.941	6647.67	710.123	7388	596.499
K12574	4590	4144	3806	6506	5902	6908	6952	7532	7104	7478	7630	7376	7324	5916	4656	6074	5230	5450	4632	3968	4682	5258	3584	2838	5744	5562	5774	5924	6024	7730	7620	7162	6908	8230	9134	6986	218338	4180	393.238	7043.11	559.495	5775	912.523	4160.33	873.75	6126.33	801.492	7673.33	867.859
K00566	5356	4078	4642	5324	4562	5312	5632	6108	6128	6086	6474	6134	7014	5214	4682	5294	5740	4734	5122	4220	4840	5332	4218	3654	8486	7722	8106	8882	8108	10156	6752	6246	6244	6896	8136	6594	218228	4692	640.465	5751.11	597.302	5446.33	861.699	4564.33	639.299	8576.67	868.029	6811.33	700.59
K11744	3866	3280	3140	6772	5698	7306	7400	8344	7358	6854	7684	6910	9226	6478	5156	5650	5160	4748	4718	4078	4894	4710	3516	2802	8840	8322	8726	7838	7018	9452	5272	5252	4972	5716	5504	5512	218172	3428.67	385.156	7147.33	727.773	6069.67	1656.16	4119.67	825.649	8366	852.232	5371.33	260.675
K01835	3842	3356	3260	4444	4108	5442	5362	5728	5874	5106	5714	5834	7430	5666	4474	5692	6520	4724	4842	4560	5068	5740	3666	2858	8296	7906	8188	9026	8078	10724	7790	7298	7382	8168	8572	7260	217998	3486	312.019	5290.22	630.832	5751	1105.13	4455.67	1035.44	8703	1062.59	7745	535.105
K03832	7528	5488	5542	3962	3716	4694	5042	5564	4614	5288	5598	5068	7958	5482	4948	6920	9228	5006	4230	3240	3738	6130	4380	3744	8576	7726	8008	11414	9416	11824	5772	5020	5426	5176	6944	5574	217984	6186	1162.52	4838.44	661.33	6590.33	1753.41	4243.67	1008.93	9494	1749.18	5652	688.015
K02563	5542	4110	4328	5704	5072	6080	5922	7050	6206	6098	6560	6026	6994	5092	4568	5538	5924	4956	5178	4204	5444	5790	4816	3960	6972	7124	7224	8008	7400	9808	6926	6090	6216	6942	7582	6276	217730	4660	771.572	6079.78	544.612	5512	865.265	4898.67	712.795	7756	1067.52	6672	577.753
K18009	4826	3532	3670	8030	6956	8336	8030	9288	7602	8372	8604	8372	6932	5330	4204	4208	3246	4566	3690	3284	4388	5166	3716	3772	7386	7404	7758	5616	7096	8150	5996	5642	5742	6142	6736	5582	217370	4009.33	710.612	8176.67	650.256	4747.67	1263.74	4002.67	671.037	7235	872.078	5973.33	430.595
K07152	7564	5536	5836	6186	5256	6104	6310	7530	6136	6960	7352	6906	8488	6206	5286	6528	6614	5294	3820	3312	4298	5262	4398	3798	7334	7098	7220	5654	6572	7712	5938	5384	5372	5742	5984	5814	216804	6312	1094.59	6526.67	718.365	6402.67	1176.75	4148	671.562	6931.67	727.102	5705.67	268.07
K07089	4750	4688	4294	4596	4170	5598	5376	5542	6352	5394	6130	5760	6748	5428	4506	6192	7138	5624	5388	4588	5030	5464	4018	3298	8652	8252	8112	10246	9028	11912	6002	5468	5280	5742	6342	5694	216802	4577.33	247.324	5435.33	687.101	5939.33	956.026	4631	846.244	9367	1462.47	5754.67	378.804
K06954	6084	4902	4578	5524	4796	5600	5782	6614	5688	6204	6500	5918	7388	5572	4760	5398	5924	4186	4798	4000	4758	5884	4548	3906	8212	7634	7728	7544	7286	9556	6534	5948	6240	6430	7752	6580	216756	5188	792.689	5847.33	553.018	5538	1097.77	4649	713.128	7993.33	823.588	6580.67	618.582
K16554	4922	3810	3910	6994	5352	6858	7040	8706	6408	6920	7534	7344	7186	5332	4512	5604	5348	4708	5100	4032	4252	8206	4558	3804	7252	6720	6898	8274	7466	9862	5356	4890	5024	5624	5712	5236	216754	4214	615.181	7017.33	894.832	5448.33	947.854	4992	1637.7	7745.33	1170.51	5307	324.325
K03572	5412	4424	4506	5314	4602	5692	6010	6680	5994	6098	6468	5924	7308	5786	4916	6588	7620	5372	5064	3964	5030	5198	4340	3680	7526	7402	7220	9286	7792	10420	5894	5444	5364	5740	6906	5618	216602	4780.67	548.286	5864.67	617.654	6265	1083.96	4546	641.685	8274.33	1287.83	5827.67	562.323
K15726	4834	3966	4310	5836	4986	5988	6176	7340	5970	6690	6722	6500	5350	4788	4152	6580	8556	5998	2946	2608	3166	3372	3068	2150	7562	6664	6958	10866	8668	9956	6976	6852	6768	7064	8960	7120	216466	4370	437.1	6245.33	669.739	5904	1556.97	2885	440.521	8445.67	1694.52	7290	828.468
K06180	5290	4634	4502	5508	4642	5744	5986	6502	6264	6400	6542	6622	7378	5630	4808	5966	7344	5424	4492	3952	4440	5410	3644	3120	7096	6776	6878	8938	7862	10658	6334	5774	5858	6470	7288	6246	216422	4808.67	422.039	6023.33	643.176	6091.67	1053.14	4176.33	792.546	8034.67	1518.61	6328.33	543.386
K21000	2262	2492	2032	5106	4672	5840	5334	5308	6362	4698	5168	4600	9664	7852	5738	5332	4900	4122	3996	3846	4976	4120	2110	1850	10468	9650	10020	8120	6788	10572	7786	7404	7460	8890	8904	7910	216352	2262	230	5232	578.889	6268	2082.1	3483	1231.39	9269.67	1504.67	8059	676.63
K15836	3298	2770	2874	6014	5220	6676	7104	7300	8422	6318	7878	6516	5280	4800	3870	3828	4622	4276	5544	4628	4958	4082	4284	3666	10670	9942	10236	11484	9664	14676	4140	4104	4050	4402	4164	4452	216212	2980.67	279.695	6827.56	972.825	4446	564.703	4527	667.63	11112	1858.43	4218.67	166.631
K06876	4378	3506	3630	3684	3170	4094	4172	4552	4172	3644	3584	3670	6892	5494	4370	4802	4888	3574	6362	5636	6614	7952	5340	4496	9030	8370	8780	7852	9142	10730	8296	7670	7644	8352	9962	7686	216190	3838	471.746	3860.22	417.48	5003.33	1123.01	6066.67	1193.46	8984	977.306	8268.33	890.301
K01796	4732	3534	3480	6898	5788	6762	6456	7098	5784	6732	6894	6794	6738	5078	4346	4750	3602	4100	4628	3870	5374	6048	4020	3462	7170	7314	7436	5800	7636	8406	7684	6760	6898	7902	8840	7224	216038	3915.33	707.769	6578.44	480.404	4769	1091.9	4567	985.33	7293.67	851.056	7551.33	769.601
K01889	5862	4378	4872	5960	5112	6146	6040	6888	5930	6532	6940	6462	7746	5606	4748	6236	6216	5484	4306	3592	4416	5056	4166	3584	6576	6274	6334	8152	7024	9394	6558	5974	6074	6970	7988	6404	216000	5037.33	755.689	6223.33	563.213	6006	1013.87	4186.67	554.948	7292.33	1240.69	6661.33	741.567
K00324	6628	5152	4918	5378	4478	5560	5262	6252	5150	6018	5854	5902	7246	5250	4748	5566	5422	4566	4554	3900	4790	6154	4796	4186	6166	5980	6252	6136	6524	7768	8194	7346	7650	8812	9858	7324	215740	5566	927.131	5539.33	541.864	5466.33	954.203	4730	781.223	6471	660.198	8197.33	992.239
K01740	5748	4912	4450	5458	4894	5550	5360	6588	5756	6018	6448	5872	8582	5842	5064	5798	5508	4678	4382	3516	4906	5896	4522	4306	6720	6614	6942	5568	6940	7430	7564	6944	7096	7924	8486	6938	215220	5036.67	657.919	5771.56	534.101	5912	1382.16	4588	785.81	6702.33	622.616	7492	623.519
K03040	5994	4766	4790	5604	4916	5874	5480	6478	5608	5942	6216	6190	7894	5848	4936	5722	6062	5046	4730	3952	4494	5362	4746	4208	6178	5722	5954	7020	6706	8612	7208	6606	6808	7544	8760	6780	214756	5183.33	702.16	5812	470.149	5918	1067.08	4582	490.249	6698.67	1052.96	7284.33	799.028
K09992	4624	3892	3616	6902	5018	6132	6294	8530	5574	6234	6174	6112	11784	7938	6482	7730	7072	5860	3686	3888	4830	6424	4434	3570	6440	5824	6108	6702	7914	8590	5278	4794	4760	5024	5256	4972	214462	4044	520.907	6330	973.501	7811	2094.1	4472	1068.87	6929.67	1087.65	5014	220.472
K04773	5136	4226	4182	6244	5008	5770	6016	7182	6232	6420	6698	5966	7342	5644	5048	5764	6652	4926	5026	4010	4598	5814	4218	3412	7894	7480	7382	8832	7778	10266	5570	5040	5386	5608	6154	5476	214400	4514.67	538.54	6170.67	607.281	5896	938.444	4513	838.478	8272	1104.17	5539	363.408
K00053	5420	4598	4584	5800	5316	6154	6496	7158	6306	6402	6924	6750	7816	5670	4996	5790	5408	5242	4590	3712	4782	5522	4192	3998	5976	5636	5756	5514	6284	7150	7346	6678	6650	7398	8308	7038	213360	4867.33	478.675	6367.33	567.413	5820.33	1018.84	4466	646.991	6052.67	602.547	7236.33	613.432
K09471	5662	4436	4378	5180	4262	5346	5310	6014	5222	5782	5444	5840	8284	6022	5018	6152	5320	5128	4118	3348	4468	5100	4638	4256	5622	5776	6034	4794	5904	6334	8984	7866	8474	9438	10866	8072	212892	4825.33	725.155	5377.78	512.367	5987.33	1218.72	4321.33	586.703	5744	524.635	8950	1102.98
K01673	4804	3908	4042	6522	5408	6374	6620	7824	5988	6832	7368	6824	8184	5974	5146	6472	6846	5200	3644	3242	3754	5388	3522	3162	7050	6592	6810	5864	6792	8074	6322	5738	5810	6496	7750	5968	212314	4251.33	483.29	6640	709.803	6303.67	1142.37	3785.33	817.63	6863.67	718.44	6347.33	747.546
K03595	5558	4162	4210	4822	4514	5162	5654	5884	5516	5510	5902	5540	7012	5590	4636	5596	5964	4492	4738	4094	4938	6620	4266	3808	8350	7426	8028	7578	7834	9906	6416	5918	6198	6564	7420	6476	212302	4643.33	792.488	5389.33	470.456	5548.33	923.829	4744	1008.38	8187	903.485	6498.67	507.552
K08153	4998	3972	3960	4892	4460	5758	6210	6080	6544	5900	6766	5916	7216	5814	4672	6156	5936	5392	4824	4328	5050	4566	3428	2984	7668	7352	7396	7500	6950	9852	6336	5928	5798	6772	8458	6176	212008	4310	595.856	5836.22	738.805	5864.33	844.334	4196.67	816.92	7786.33	1039.56	6578	982.151
K02049	4250	3324	3512	8588	7456	9192	8870	10186	8208	8952	9330	9064	8772	6438	5148	5170	4198	5122	3842	3294	3718	4938	3736	2864	5838	5516	5822	5530	5698	7294	4672	4128	4168	5082	5598	4454	211972	3695.33	489.466	8871.78	758.999	5808	1617.87	3732	694.553	5949.67	672.833	4683.67	569.603
K03770	6250	4788	5250	5316	4862	5806	6216	6950	6370	6344	6638	5932	7276	5788	4464	6488	7650	4940	4566	3666	4508	5122	4462	3466	7198	7056	7118	8408	7790	9620	5222	5008	5202	5232	5504	5222	211698	5429.33	747.316	6048.22	651.505	6101	1269.29	4298.33	618.618	7865	1003.78	5231.67	158.278
K00609	5982	4548	4606	5832	4798	5910	6004	6918	5676	6486	6624	6250	7766	5768	4822	5538	5290	5166	4450	3532	4416	5204	4248	3752	6620	6438	6648	7410	6912	8828	6604	6192	5982	6802	7314	6168	211504	5045.33	811.695	6055.33	621.426	5725	1050.68	4267	589.825	7142.67	892.127	6510.33	497.471
K01206	5078	4672	4206	4128	3382	4750	4778	5288	5836	5102	5590	5690	7790	5718	5062	6204	8248	4412	3508	3332	4398	4250	2540	2076	8630	8092	8564	13618	11048	14026	5242	5146	5130	5144	5276	5114	211068	4652	436.344	4949.33	797.138	6239	1512.46	3350.67	917.907	10663	2658.53	5175.33	66.6893
K00958	5960	4520	4936	5976	5454	6552	6470	6832	6934	6436	7036	6168	6270	5078	4024	4344	3948	4372	5482	4672	5556	5452	5186	5204	7890	7636	7292	8204	7302	9852	5192	4788	4798	5142	4978	5098	211034	5138.67	741.084	6428.67	503.326	4672.67	878.647	5258.67	324.995	8029.33	959.106	4999.33	174.849
K02039	5166	3800	4008	5892	5100	6070	6108	6750	5858	5988	6424	6050	7700	5688	4732	5590	5488	4964	3898	3422	4226	4720	3850	3260	7672	7158	7580	7736	7378	9356	6386	6130	6224	6854	7142	6316	210684	4324.67	736.001	6026.67	446.782	5693.67	1052.2	3896	532.76	7813.33	784.754	6508.67	399.239
K00133	5644	4464	4610	5782	5320	6060	5986	6800	5710	6270	6638	6182	7102	5342	4842	5874	5888	5334	4386	3552	4278	5290	4250	3774	6442	6004	6506	6392	6334	7782	6942	6440	6524	7174	8086	6510	210514	4906	643.282	6083.11	459.445	5730.33	777.687	4255	602.413	6576.67	615.937	6946	628.62
K13038	5428	4228	4168	5614	4856	5840	5552	6554	5708	5926	6278	5638	6842	5280	4392	5264	5676	4596	4406	3812	4742	5776	4184	3620	7150	7022	7036	7692	7298	8996	6948	6504	6256	6994	7538	6582	210396	4608	710.774	5774	478.322	5341.67	875.271	4423.33	775.617	7532.33	758.379	6803.67	455.012
K22491	4332	3382	3378	5116	4322	5290	5368	6074	5128	5266	5736	5324	6882	4966	4224	5128	5588	4184	4674	4014	4930	5638	4132	3470	9230	8468	8584	8478	8504	10858	6708	6342	6236	6772	7244	6338	210308	3697.33	549.641	5291.56	476.302	5162	1001.58	4476.33	766.731	9020.33	946.273	6606.67	380.374
K11069	6690	4948	4912	6658	5574	6060	5482	6546	5722	5962	6016	5990	8834	6374	5548	5650	4572	4544	3672	3108	3578	4140	5204	4244	5254	4618	5186	4820	4986	6432	7852	7316	7398	8628	9188	7374	209080	5516.67	1016.3	6001.11	397.422	5920.33	1588.66	3991	722.44	5216	640.05	7959.33	779.724
K14441	5042	4024	4050	4280	3930	4830	4694	5644	5030	5046	5430	4860	7850	6054	5106	6016	6740	5142	4102	3582	4626	5096	3744	2772	7608	7024	7384	8406	7768	9788	7586	6476	6896	7420	8160	6860	209066	4372	580.383	4860.44	528.3	6151.33	1036.46	3987	818.624	7996.33	990.073	7233	607.397
K26735	4286	3982	3602	6276	5016	5922	6254	6968	6138	6732	7380	6664	6860	5908	4962	5902	6816	4900	4112	3712	4302	4448	4076	3516	7300	7390	7394	6624	6780	8360	6230	5886	5620	6106	6644	5934	209002	3956.67	342.703	6372.22	680.558	5891.33	853.243	4027.67	352.941	7308	611.151	6070	349.635
K01565	3470	3750	2932	5396	4362	5386	5382	7076	5294	5480	5884	5378	7990	6130	4814	5816	6196	4656	4814	4226	5966	6340	4130	3424	8192	7908	8562	9500	10244	11728	4786	4414	4504	4908	5000	4960	208998	3384	415.726	5515.33	708.838	5933.67	1202.98	4816.67	1131.5	9355.67	1450.36	4762	247.147
K01956	5356	4266	4254	5750	4926	5446	5650	6724	5418	5988	6286	6182	6720	5110	4608	5572	5766	4670	4200	3494	4188	5538	4782	3842	6698	6450	6618	7006	7120	8666	7120	6256	6452	6954	8124	6650	208850	4625.33	632.804	5818.89	539.461	5407.67	793.707	4340.67	726.222	7093	809.657	6926	666.84
K01176	2984	2438	2328	3688	3518	4748	4830	4990	5452	3962	4518	5000	7630	6108	5254	6090	7090	4772	4184	3590	4574	6244	3276	2684	7022	6530	6602	7298	7058	8958	9226	8388	8614	9532	10816	8354	208350	2583.33	351.319	4522.89	659.121	6157.33	1075.24	4092	1246.77	7244.67	888.431	9155	941.134
K21929	5202	3904	4020	6498	5454	6046	6478	7518	6264	6684	7166	6234	7138	5554	4634	5430	4920	4664	4184	3434	4212	5184	4182	3462	7172	6746	6756	7406	7172	8816	6016	5540	5412	6218	6736	5852	208308	4375.33	718.26	6482.44	606.025	5390	938.457	4109.67	640.534	7344.67	765.917	5962.33	481.708
K02835	5404	4368	4510	5742	4962	5446	5840	6390	5588	6124	6416	5922	7226	5328	4746	5514	5836	4892	4122	3496	4434	5236	4410	3656	6784	6312	6534	7358	6986	8908	6620	6178	6062	6996	7660	6296	208302	4760.67	561.649	5825.56	463.547	5590.33	895.653	4225.67	627.03	7147	935.556	6635.33	605.52
K00773	5340	4478	4326	5440	4702	5450	5668	6226	5486	5672	6250	5786	7272	5930	4582	5870	6490	4692	4584	3742	4644	5218	3954	3380	7026	6646	6714	7580	7338	9208	6484	5926	6004	6668	6918	6198	207892	4714.67	546.861	5631.11	463.353	5806	1036.89	4253.67	679.164	7418.67	946.785	6366.33	390.564
K00033	4612	3494	3606	5686	5038	6160	6082	6814	6202	6428	6952	6308	6734	5340	4620	4812	4360	4624	4162	3654	4592	5394	3398	2928	7522	7150	7430	7396	7104	9620	6760	6236	6084	6842	7614	6006	207764	3904	615.698	6185.56	573.829	5081.67	873.277	4021.33	888.653	7703.67	952.999	6590.33	610.473
K03568	6286	5014	4954	4992	4428	4830	4924	5884	4544	5560	5800	5364	6606	5254	5054	4484	4684	4496	5010	4080	4824	6346	4980	4624	6944	6512	6980	8020	7410	9006	6798	6136	6502	7110	6878	6026	207344	5418	752.308	5147.33	529.392	5096.33	801.388	4977.33	752.049	7478.67	905.482	6575	430.631
K01469	4064	3014	3276	6522	5874	6200	6546	7882	6030	6472	6614	5902	7606	5888	4960	5260	5018	4508	4472	3998	5104	5610	5728	4664	6958	7216	6824	6434	8168	8662	5490	4934	5008	5782	5582	5008	207278	3451.33	546.517	6449.11	608.623	5540	1108.31	4929.33	675.074	7377	857.14	5300.67	361.228
K04744	6502	4910	5112	5464	4802	5776	6078	7330	5992	6082	6592	6132	6336	4722	4140	5146	5748	4140	4798	3706	4580	4704	4662	3790	7556	7214	7908	7798	7794	9290	5512	5010	5182	5358	6076	5210	207152	5508	866.734	6027.56	699.598	5038.67	884.673	4373.33	490.17	7926.67	712.526	5391.33	375.914
K02967	5784	4178	4598	5138	4484	5470	5460	5964	5382	5456	5790	5604	7252	5272	4462	5732	5940	4860	4592	3794	4412	5226	4530	3674	6490	5998	6452	7504	6912	8982	6826	6628	6368	7034	8146	6682	207076	4853.33	832.89	5416.44	422.646	5586.33	980.942	4371.33	570.187	7056.33	1071.02	6947.33	627.222
K08177	5392	3606	4094	6294	5868	6902	7378	8360	7326	7430	8108	7050	7214	5126	4190	4836	4492	4616	4412	3926	4292	6034	3952	3576	6488	6700	6986	5922	6678	7616	5350	5034	4892	5686	6000	5194	207020	4364	923.106	7190.67	788.678	5079	1092.59	4365.33	869.357	6731.67	559.562	5359.33	416.852
K09516	5046	3814	3890	4730	3908	4732	5096	5424	5070	4680	5028	4662	5476	4424	3986	4262	4702	3554	5512	4864	6372	7556	4724	4004	7870	7874	8122	7692	7878	9648	7302	6512	6428	7396	7746	6858	206842	4250	690.403	4814.44	424.062	4400.67	656.614	5505.33	1283.14	8180.67	731.774	7040.33	525.408
K07403	5622	4680	4566	6090	5074	5954	6272	7558	6182	6872	7376	6726	7418	5822	4938	5490	5834	4588	4306	3602	4892	4268	3920	3156	7438	7192	7340	7874	6912	9296	5016	4808	4714	5018	4984	4956	206754	4956	579.583	6456	767.429	5681.67	984.239	4024	605.774	7675.33	854.528	4916	125.774
K01596	4722	3882	3456	4728	4524	5266	5002	6044	5168	5572	5892	5624	6314	4650	3812	4526	4236	4512	4548	4052	5044	5690	4100	3192	7400	7034	7224	6418	7418	8476	8150	6960	7522	8612	9578	7338	206686	4020	644.183	5313.33	514.551	4675	857.112	4437.67	867.479	7328.33	671.795	8026.67	962.413
K18702	4360	3122	3430	8484	7684	8534	9160	10430	7680	9670	9212	8808	6674	4430	3870	3862	2504	4362	4082	3628	4188	4800	4186	3302	6702	6830	6946	5472	6744	7742	4366	4016	4112	4270	4300	4140	206102	3637.33	644.516	8851.33	891.625	4283.67	1360.69	4031	517.008	6739.33	729.907	4200.67	132.403
K01696	4774	4054	3838	5784	4764	5684	6052	6372	5476	6332	6234	6126	7244	5400	4772	5684	5866	5072	4408	3530	4132	5344	4398	4024	6304	6056	6560	5882	6570	7306	6870	6182	6612	7260	8528	6538	206032	4222	490.094	5869.33	514.425	5673	866.365	4306	601.38	6446.33	501.663	6998.33	830.949
K00013	4782	3924	4016	5166	4648	5294	5468	6002	5286	5720	5854	5632	6958	5470	4744	5688	5996	5050	4300	3596	4630	5292	3910	3408	6672	6848	6930	7304	7180	8540	6856	6256	6366	7340	7810	6246	205182	4240.67	471.06	5452.22	410.688	5651	780.417	4189.33	701.835	7245.67	673.779	6812.33	648.865
K04485	5318	4122	4338	4754	4146	5066	5260	5678	4892	5154	5674	5472	6996	5124	4490	5326	5812	4558	4400	3904	4476	5078	3798	3268	7180	6862	7286	7342	7218	9160	7338	6570	6816	7642	8178	6468	205164	4592.67	637.374	5121.78	487.397	5384.33	931.043	4154	631.222	7508	826.431	7168.67	670.102
K01265	4904	3902	3912	5028	4710	5282	5232	5708	5168	5174	5438	5430	6560	4978	4264	5342	5668	4656	4216	3590	4490	5426	3902	3326	6674	6358	6648	6964	6940	8644	7634	6896	7192	7996	9456	7208	204916	4239.33	575.64	5241.11	280.965	5244.67	812.174	4158.33	748.571	7038	817.473	7730.33	929.143
K01952	6428	5216	5130	3014	3010	3948	4148	4226	4328	4456	4812	4684	6516	4814	4408	6308	7514	4624	4242	3348	4168	5352	4222	3798	8738	8756	8938	8994	8880	10578	6096	5636	5750	5870	7426	5972	204348	5591.33	725.849	4069.56	654.519	5697.33	1260.01	4188.33	665.893	9147.33	707.997	6125	657.514
K07079	4516	3880	4086	4186	3626	4612	5450	5990	6090	5354	6344	4996	5592	4898	3956	4434	5234	3860	7388	5842	6654	5150	4072	3038	8810	8254	8344	10890	8122	12498	4738	4510	4542	4796	4760	4808	204320	4160.67	324.508	5183.11	915.261	4662.33	698.771	5357.33	1619.52	9486.33	1799.05	4692.33	131.632
K02065	6072	4316	4734	5590	4786	5584	5546	6186	5362	6070	6320	5654	6280	4684	4402	4984	5994	4644	4974	4186	4406	3954	4680	3644	7448	6854	7114	8298	7356	10094	5458	5518	5320	5960	5954	5452	203878	5040.67	917.288	5677.56	468.24	5164.67	780.794	4307.33	484.28	7860.67	1197.91	5610.33	276.213
K23536	5598	4356	4436	5738	5114	6528	6502	6820	6946	6128	6770	6280	8686	6652	5200	5884	5422	4972	4158	3550	4502	4526	3170	2692	6270	5964	6100	5704	5942	7798	5960	5202	5232	6256	6606	5520	203184	4796.67	695.127	6314	586.522	6136	1383.69	3766.33	752.105	6296.33	759.091	5796	573.01
K25026	3856	3722	3250	4436	4000	5040	5168	5550	5410	5270	5402	5860	7842	5918	4964	6302	5816	5334	3744	3616	4662	5636	2980	2430	7764	7308	7802	8908	8106	10456	6092	5784	5652	6094	7030	5888	203092	3609.33	318.323	5126.22	575.46	6029.33	1003.64	3844.67	1156.57	8390.67	1142.43	6090	491.915
K23980	6048	4240	4550	5634	5126	5982	5780	6882	5758	6420	6350	6058	7750	5890	4992	5406	5064	4936	3866	3134	4164	4560	3332	2962	5196	4988	4992	5044	5862	6922	7866	6794	7116	8024	8226	7064	202978	4946	966.865	5998.89	510.551	5673	1077.97	3669.67	628.865	5500.67	771.192	7515	595.02
K00140	5682	4524	4572	5816	5662	6960	6326	7188	6252	7074	6596	7270	8006	5420	4960	4972	3836	4818	3848	3008	4092	4412	4024	3660	5744	5438	5868	5168	5872	7274	6584	5974	6184	6336	7380	6094	202894	4926	655.155	6571.56	595.014	5335.33	1409.12	3840.67	479.422	5894	729.804	6425.33	513.083
K03298	6150	4580	4422	4266	3528	4540	4762	5096	5106	4810	4896	4712	7140	5258	4052	5892	6192	4492	4102	3804	4198	4472	3374	2938	8008	7488	7548	9216	7128	11076	6600	6010	5970	6956	7890	6176	202848	5050.67	955.323	4635.11	490.637	5504.33	1139.59	3814.67	569.989	8410.67	1493.68	6600.33	736.968
K00240	5338	4272	4166	5468	4702	5568	5968	6464	5540	6076	6374	5836	7812	5482	4672	5536	5148	4810	3994	3510	4044	4974	4044	3624	6794	6264	6476	6360	6408	8176	6390	5988	6044	6808	7592	6042	202764	4592	648.225	5777.33	537.203	5576.67	1148.68	4031.67	515.372	6746.33	723.28	6477.33	628.679
K07107	5840	4000	4316	5242	4888	6126	6030	6686	6026	6398	6862	6160	7878	5808	4794	5810	5884	4796	3806	3324	4088	4602	3576	3022	6516	5936	6290	6406	6304	8298	5934	5618	5618	6200	7718	5880	202680	4718.67	983.873	6046.44	633.126	5828.33	1126.1	3736.33	562.832	6625	842.468	6161.33	793.216
K02029	4818	3932	4274	5914	5084	6082	6046	6916	6294	5948	6070	5998	7386	5360	4392	5288	5152	4510	4328	3396	4082	4802	3744	3374	6408	5956	6148	6900	6310	9160	6522	5738	6032	6924	7242	6044	202574	4341.33	446.821	6039.11	470.986	5348	1078.13	3954.33	559.862	6813.67	1192.45	6417	582.597
K02276	6056	4182	4716	6528	5650	6536	6544	7934	6052	6914	7092	6720	8146	5692	4660	6044	5916	5192	3560	2940	3856	5082	4668	3822	5514	5168	5610	4382	5654	6266	6104	5522	5402	5932	6506	5910	202472	4984.67	965.456	6663.33	643.597	5941.67	1194.76	3988	772.749	5432.33	625.371	5896	400.192
K07126	3414	3152	2674	8082	6654	8240	8780	10570	7920	9070	9108	8578	6148	4362	3550	4178	4136	4000	3504	3024	3638	4284	4258	3590	6606	6510	7016	6218	6630	7886	4066	3958	3892	4372	5972	4252	202292	3080	375.217	8555.78	1061.98	4395.67	900.923	3716.33	482.111	6811	585.608	4418.67	781.891
K01358	4924	4020	4144	5380	4362	5728	5056	5940	4948	5484	5394	5802	7764	5184	4814	5746	5936	5004	4322	3718	4638	5750	4294	3590	5802	5402	5758	5692	6558	7112	7276	6948	7106	7510	8168	6760	202034	4362.67	490.067	5343.78	492.432	5741.33	1081.05	4385.33	776.711	6054	645.081	7294.67	500.214
K14731	5212	4222	4264	4868	4346	5268	5494	5748	5388	5144	5514	5424	7394	5842	4582	4736	4342	4232	3964	3634	4916	4934	3208	2696	7388	7232	7418	5664	6438	7720	7584	6952	6930	7458	8704	7114	201974	4566	559.846	5243.78	418.466	5188	1224.36	3892	906.02	6976.67	773.946	7457	666.565
K02109	4102	3316	3626	4848	4274	5352	5534	6446	5258	5158	5382	5078	6720	5054	4254	5312	5700	4462	4948	4020	4558	5626	4652	3604	7680	7082	7416	7174	7288	9916	6200	5814	5774	6708	7376	6164	201876	3681.33	395.911	5258.89	579.923	5250.33	896.506	4568	707.18	7759.33	1076.93	6339.33	609.315
K00821	5772	4570	4276	5130	4694	5480	5202	5986	5258	5556	5686	5620	6732	4992	4300	5814	6354	5050	4746	3916	4548	5658	3884	3192	6486	5984	6288	6390	6968	8000	6886	5974	6004	6566	7498	6238	201698	4872.67	792.597	5401.33	376.666	5540.33	920.493	4324	854.319	6686	719.019	6527.67	589.254
K03495	6622	4998	5146	4806	4540	5134	5126	6032	5132	5182	5858	5094	7270	5472	4646	5912	7088	4562	4782	3910	4696	5106	4496	3882	6682	6576	6450	8486	7326	9196	5180	4584	4890	5256	6078	5134	201330	5588.67	897.947	5211.56	466.481	5825	1166.24	4478.67	492.44	7452.67	1139.37	5187	500.663
K09022	6184	4118	4664	6994	5980	7146	6968	8306	6274	8236	8328	7368	7600	5396	4190	4718	4834	4136	3564	3022	3914	4292	3818	3030	5674	5024	5122	5472	6104	7292	5530	4946	5302	5580	6706	5356	201188	4988.67	1070.58	7288.89	863.936	5145.67	1288.35	3606.67	506.951	5781.33	836.864	5570	599.865
K00611	4552	3706	3650	5480	4830	5760	5754	6746	5786	6280	6386	5874	6576	5218	4570	5258	5158	4738	4104	3620	4420	4728	3578	2840	7004	6436	6718	7944	6870	9268	6130	5530	5696	6706	7318	5858	201090	3969.33	505.38	5877.33	555.38	5253	706.02	3881.67	678.42	7373.33	1059.55	6206.33	682.715
K02012	5048	4128	3788	6034	5280	6014	6054	6906	5530	6048	6018	5830	8758	6248	5198	5886	5328	4584	4238	3542	4182	5540	4010	3704	5984	5636	5934	4914	6064	7188	6120	5556	5646	6486	7034	5934	200392	4321.33	651.869	5968.22	445.371	6000.33	1468.39	4202.67	708.859	5953.33	737.411	6129.33	556.093
K15738	5110	4438	4114	4138	3836	4778	4566	4926	4914	4150	4550	5066	7224	5230	4778	6090	6832	4714	4028	3346	4238	6058	4008	3620	6338	6454	6628	6162	7042	7682	7710	7018	6914	7684	8840	6870	200094	4554	508.031	4547.11	423.059	5811.33	1070.04	4216.33	957.515	6717.67	559.572	7506	754.448
K06949	5370	4110	4082	3632	3424	4146	4486	4478	4640	4458	4616	4570	7296	5304	4516	5818	7424	4700	3718	3148	4066	4808	3254	2650	7206	6962	7310	8498	7840	9848	7572	6766	6670	7602	8262	6652	199902	4520.67	735.677	4272.22	448.605	5843	1262.48	3607.33	763.746	7944	1082.02	7254	660.287
K03546	4360	3440	3584	3518	3270	4024	3974	4392	4652	3972	4076	4318	6420	5454	4246	5500	5616	5084	3556	3188	3974	4408	3140	2726	7472	7224	7444	7722	6548	9298	8368	7578	7944	9310	11936	8130	199866	3794.67	494.859	4021.78	425.538	5386.67	711.404	3498.67	612.909	7618	914.871	8877.67	1607.48
K01129	5014	4136	4166	4716	4356	5638	5358	5612	5706	5514	5884	5372	7208	5548	4618	5330	5852	4550	4450	3806	4604	5172	3798	3292	6612	5906	6464	6798	6616	8924	6468	6088	6056	6810	7340	6054	199836	4438.67	498.479	5350.67	497.608	5517.67	974.774	4187	679.822	6886.67	1043.81	6469.33	522.088
K05592	4224	4080	3338	4320	3992	5300	4768	5164	5404	4804	5026	5532	7540	5254	4830	5952	6740	5530	3472	3154	3938	4860	3098	2480	5634	5474	5862	5590	6618	6880	8096	7744	7686	8798	10320	7602	199104	3880.67	475.446	4923.33	510.1	5974.33	1006.37	3500.33	820.237	6009.67	592.206	8374.33	1049.78
K00858	5448	4022	4208	5044	4250	5348	5396	6206	5538	5526	6036	5722	6410	4818	4202	5054	5594	4442	4840	4062	5206	5856	4108	3466	7134	6420	6856	6968	6730	8732	5906	5366	5256	5980	6358	5664	198172	4559.33	775.207	5451.78	572.338	5086.67	809.948	4589.67	873.979	7140	816.24	5755	411.251
K00433	3188	2420	2616	7148	5828	7106	6960	8546	6726	7436	7390	7032	6720	5212	4066	4384	3648	4414	3516	3224	3966	5020	3202	2618	6648	6106	6442	5872	6138	7744	6082	5338	5584	6244	7770	5612	197966	2741.33	399.046	7130.22	712.751	4740.67	1097.54	3591	827.167	6491.67	671.275	6105	882.593
K14652	5446	4358	4314	5510	4702	5502	5478	6496	4926	5882	6034	5692	6370	4862	4366	4916	5108	4566	4344	3560	4290	5708	4258	3804	6112	5626	5764	6842	6524	8164	6394	5924	5902	6750	6946	6016	197456	4706	641.236	5580.22	544.163	5031.33	706.977	4327.33	745.037	6505.33	931.921	6322	448.594
K18122	3556	2830	2914	3612	3286	4228	4434	5002	5114	4380	5020	4616	5436	4346	3734	4412	5214	3630	5408	4516	5328	5144	3482	2840	9076	8724	8882	9760	8628	12080	6512	6106	5772	6530	6722	6072	197346	3100	397.135	4410.22	632	4462	741.936	4453	1068.06	9525	1314.88	6285.67	358.636
K00641	4570	3846	3634	5626	4780	5930	5844	6756	5500	5978	6290	5974	6744	4714	3882	4420	4500	4274	4128	3768	4912	5910	4448	3740	6364	6298	6464	5784	6808	7798	6260	5802	5946	6324	7414	5916	197346	4016.67	490.784	5853.11	544.302	4755.67	1012.77	4484.33	825.94	6586	679.492	6277	593.426
K03310	5444	4094	4042	4178	3756	4452	4400	4990	4208	4278	4458	4446	5234	4024	3654	5018	6024	4430	4604	3798	4712	6450	5156	4284	7432	7170	6998	8518	8324	9442	6898	6064	6158	6460	7816	5886	197300	4526.67	794.859	4351.78	326.175	4730.67	866.903	4834	912	7980.67	945.087	6547	715.914
K06902	7074	4808	5374	5292	4606	5562	5766	6340	5862	5530	5814	5802	7696	5830	4618	5770	5756	4816	4006	3512	3912	4462	4086	3010	6566	6212	6788	6570	5926	8150	5280	5008	4976	5476	5670	5164	197090	5752	1179.34	5619.33	476.482	5747.67	1090.64	3831.33	505.208	6702	772.308	5262.33	271.477
K01000	5724	4518	4516	5032	4322	5316	5144	5852	5310	5476	6038	5468	7158	5376	4792	5716	5692	4906	3894	3438	4030	5034	4030	3350	5956	5886	5864	7070	6422	8176	6452	5962	5658	6566	6954	5830	196928	4919.33	696.862	5328.67	494.236	5606.67	852.49	3962.67	602.025	6562.33	915.868	6237	499.013
K03500	5350	4166	4182	4942	4266	4950	5050	5948	5062	5182	5682	5440	6236	4726	4228	4686	5198	3946	4214	3456	4362	5412	4080	3076	6076	5900	6384	6770	6958	8334	7442	6370	6548	7486	8208	6600	196916	4566	679.011	5169.11	485.3	4836.67	810.852	4100	808.294	6737	878.913	7109	718.435
K00113	5672	4140	4382	5314	4956	5456	5528	6210	5144	5574	5802	5278	7752	5758	4906	5394	5420	4392	3914	3082	3946	5024	4222	3338	7358	7232	7576	5984	6848	7814	5860	5212	5324	5862	5638	5572	196884	4731.33	823.578	5473.56	371.443	5603.67	1155.14	3921	685.813	7135.33	651.434	5578	269.179
K00995	4674	3758	3604	4670	4294	5136	5142	5322	5098	5264	5512	5132	6036	4758	3686	4220	3756	3754	4070	3876	4660	5196	3576	2856	7208	6926	7156	7338	6964	9038	7384	6706	6644	7898	8594	6972	196878	4012	578.457	5063.33	366.137	4368.33	913.553	4039	820.448	7438.33	798.654	7366.33	762.03
K21084	6022	4604	4810	4890	4462	4928	4906	5726	4818	4842	5010	5272	6764	5022	4306	5290	5208	4348	4136	3352	4478	5732	4610	4320	5568	5782	5744	5168	5514	6642	7230	6622	6982	7842	8956	6704	196610	5145.33	766.171	4983.78	348.648	5156.33	894.387	4438	773.323	5736.33	494.6	7389.33	884.211
K00830	4954	3882	4154	6680	5828	6734	6642	7782	6132	7012	7370	6486	7132	5266	4310	5398	4618	4552	4222	3606	4444	5014	4396	3400	6460	6010	6404	5840	6250	7452	4530	4522	4106	4950	4878	4782	196198	4330	557.25	6740.67	595.379	5212.67	1032.08	4180.33	591.869	6402.67	565.416	4628	310.877
K00003	4312	3642	3600	5366	4656	5630	5590	6162	5584	5878	6448	5922	6574	5362	4424	5260	5052	4612	4214	3492	4526	4552	3708	3038	6382	5898	6398	5718	6148	7660	6668	6188	6164	7044	7944	6134	195950	3851.33	399.501	5692.89	510.565	5214	759.785	3921.67	609.776	6367.33	687.337	6690.33	712.198
K01638	5794	4410	4460	5464	4646	5654	5934	6514	5338	6194	6268	6070	7084	5408	4886	5076	4908	4550	4204	3146	3790	5314	4660	4238	5968	5784	5828	5102	6044	6538	5744	5324	5246	6576	7834	5870	195868	4888	785.017	5786.89	575.84	5318.67	908.842	4225.33	738.813	5877.33	465.782	6099	974.11
K01907	4944	3220	3952	5116	4736	5438	4892	5822	4872	4600	5168	4914	6040	4856	3928	4348	4518	2924	4592	3648	4776	5034	4478	4012	7086	6996	7214	6298	6668	7694	7360	6846	6792	7492	7694	6502	195470	4038.67	865.261	5062	377.451	4435.67	1030.33	4423.33	509.718	6992.67	476.98	7114.33	466.873
K09691	4330	2806	3420	5940	4866	6346	6420	7322	6202	6980	7620	6668	7272	5678	4398	4966	5480	4508	3636	3172	3560	4092	2970	2556	7660	7066	7438	6558	6348	8466	5012	4800	4814	5208	5752	5040	195370	3518.67	766.776	6484.89	813.106	5383.67	1055.89	3331	544.208	7256	775.656	5104.33	352.078
K00147	4194	3634	3548	4948	4406	5324	5202	6084	5662	5330	5684	5332	6450	4918	4346	5114	4628	4270	4188	3522	4364	5872	3780	3362	6656	6446	6928	6256	6500	7888	7056	6074	6306	6868	7822	6084	195046	3792	350.788	5330.22	476.993	4954.33	801.088	4181.33	912.015	6779	588.128	6701.67	684.163
K10819	4386	3292	3800	4414	4006	5722	5496	5242	6674	4920	6216	5316	6124	5578	5474	4496	4290	4782	6422	5348	5078	5230	4222	3532	7294	6646	6610	7808	6314	9738	5162	4800	4770	5146	5556	5098	195002	3826	547.463	5334	832.202	5124	712.112	4972	995.769	7401.67	1266.17	5088.67	287.064
K15520	4024	3202	3354	3766	3472	4492	4282	4440	5118	4408	4790	4318	7904	6318	4692	5618	4878	4870	3548	3380	4414	4554	2414	1706	6640	6438	6342	5726	5636	7690	8952	7936	7826	9686	9976	8142	194952	3526.67	437.357	4342.89	491.45	5713.33	1234.98	3336	1113.51	6412	743.454	8753	928.004
K07082	4848	3758	3734	4940	4356	5296	5262	5964	5372	5656	6098	5742	6462	4768	3900	4802	5012	3924	4060	3376	4136	5508	3678	2766	7166	6672	6816	7368	6806	9024	6302	5736	5424	6564	7484	6054	194834	4113.33	636.353	5409.56	538.419	4811.33	936.464	3920.67	924.577	7308.67	879.43	6260.67	722.255
K00981	6032	4432	4462	4856	4362	5122	5368	6012	5068	5588	6018	5596	7500	5076	4510	5030	5164	4142	3698	3156	4114	4902	3636	2736	6772	6282	6744	6746	6692	8520	6024	5712	5736	6328	6978	5700	194814	4975.33	915.223	5332.22	542.079	5237	1176.68	3707	754.352	6959.33	786.499	6079.67	503.826
K07566	4372	3148	3556	3650	3128	4122	4206	4502	4178	4104	4106	4274	6230	4690	3992	5174	5994	3930	3916	3636	4286	5660	3528	2978	7502	6632	7288	8090	7450	9588	7914	6930	7094	8000	9202	7332	194382	3692	623.23	4030	405.111	5001.67	978.597	4000.67	921.327	7758.33	1010.77	7745.33	833.67
K07222	3392	2548	2618	8996	7716	9410	9504	10394	8470	9266	9368	9604	7420	5258	4130	4210	2558	4546	2964	2438	3576	3650	4276	3762	4962	5114	5472	3830	5308	5546	3874	3354	3448	4222	5344	3766	194314	2852.67	468.386	9192	752.84	4687	1605.34	3444.33	647.401	5038.67	630.894	4001.33	727.772
K03651	4380	3422	3366	5112	4360	5268	5172	5986	4654	5416	5344	5254	7006	5190	4526	4834	4430	4070	3960	3472	4228	4310	3824	3280	7628	6864	7144	7010	7160	8484	6488	6172	6088	6468	7624	6200	194194	3722.67	569.956	5174	460.826	5009.33	1048.97	3845.67	408.64	7381.67	597.922	6506.67	571.245
K03306	5126	3996	4352	4466	3860	4770	5058	5654	4992	5160	5444	5140	5800	4338	3732	5270	5822	4514	4340	3538	4120	4468	3352	2920	6948	6432	6944	6838	6404	8168	6796	6438	6510	7330	8214	6608	193862	4491.33	577.742	4949.33	534.793	4912.67	851.479	3789.67	613.731	6955.67	642.239	6982.67	682.952
K09015	4996	3604	3926	5246	4488	5210	5222	6144	5236	5732	5772	5500	6892	4834	4104	4950	5608	4256	3748	3408	4244	5346	3858	3220	6376	6168	6546	6312	6624	8244	6412	5784	5980	6806	7188	5794	193778	4175.33	728.726	5394.44	469.309	5107.33	1026.32	3970.67	762.709	6711.67	768.265	6327.33	579.195
K02347	5900	3812	4316	5960	5072	5966	6252	7082	5746	6714	7292	6390	7202	6276	4910	5272	5086	4722	3808	3250	4142	3530	3558	2818	6126	5394	5482	5886	5318	7712	5516	5294	5378	5504	5780	5308	193774	4676	1089.56	6274.89	690.45	5578	963.249	3517.67	455.421	5986.33	901.042	5463.33	181.543
K00315	6982	5056	5222	6072	5134	5932	5600	6048	4958	5162	5310	5552	8254	5486	4652	5252	4574	4364	4802	3546	4566	5492	7516	7322	3728	3736	3878	3522	4608	4880	6042	5400	5580	6580	7296	5652	193756	5753.33	1067.29	5529.78	417.867	5430.33	1448.04	5540.67	1584.41	4058.67	549.629	6091.67	724.551
K01626	4528	3842	3546	5204	4648	4736	4756	5636	4296	4926	4824	5040	6262	4732	4002	4708	4034	3972	4132	3462	4232	5630	4286	3820	6488	6344	6862	5500	6772	7196	7456	7070	7022	7702	8828	7194	193688	3972	503.742	4896.22	376.827	4618.33	878.824	4260.33	738.261	6527	584.731	7545.33	678.382
K03301	5386	3772	4172	4256	3366	3802	4212	4882	3964	4856	5010	4392	7612	5456	4630	5420	5786	4146	3680	3250	3968	4138	4234	3620	8694	8478	8458	8492	8868	10212	5752	5492	5324	5302	5132	5434	193648	4443.33	840.515	4304.44	548.086	5508.33	1195.03	3815	368.449	8867	677.965	5406	210.006
K00499	5086	3412	3610	6060	5226	6080	5406	6594	4916	5606	5866	6040	7526	4790	4328	4570	3720	3752	3836	3304	4034	5592	4622	4146	7212	6996	7642	5274	7640	7234	5764	5130	5328	5812	6170	5312	193636	4036	914.7	5754.89	515.252	4781	1412.05	4255.67	782.68	6999.67	883.239	5586	393.292
K00057	4304	3408	3396	4436	3780	4832	4694	5150	4628	5082	5142	4756	5778	4508	3964	4638	4856	3852	4722	3878	4792	6084	4044	3302	7102	6772	6936	7422	7590	8788	6776	6462	6366	7230	7576	6478	193524	3702.67	520.805	4722.22	430.293	4599.33	696.725	4470.33	966.266	7435	728.596	6814.67	488.394
K03601	4064	3414	3218	4930	4218	5294	5160	5876	5270	5298	5772	5086	6264	5024	4112	5122	5168	4458	3990	3636	4668	4448	3886	3016	7276	6898	7228	7808	7402	9314	6194	5752	5592	6236	6650	5710	193452	3565.33	442.838	5211.56	481.939	5024.67	737.569	3940.67	589.856	7654.33	864.721	6022.33	406.179
K22719	5882	4266	4174	4492	3944	4952	4868	5590	5064	4706	5486	5116	6126	4404	3726	4454	5354	4016	4248	3474	4348	4894	3564	2860	7854	7224	7558	8594	7600	9976	5882	5322	5864	5928	6050	5528	193388	4774	960.658	4913.11	501.655	4680	897.046	3898	732.911	8134.33	1012.72	5762.33	277.005
K01712	6620	5326	5454	4240	3814	4622	4360	4694	4346	4592	4622	4642	7688	6108	5504	6544	7308	4978	3676	3046	3534	4048	4022	3496	5506	5006	5076	6972	5920	7830	6582	6162	6266	6912	7386	6226	193128	5800	713.019	4436.89	283.217	6355	1039.44	3637	373.748	6051.67	1128.71	6589	481.251
K00024	5538	4176	4364	5428	4868	5380	5574	6414	5636	6674	6466	6180	6746	4926	4314	5026	5176	4964	3662	3014	3810	4554	4034	3838	5788	5334	5872	5834	6020	7076	5814	5484	5480	6356	7120	5808	192748	4692.67	738.09	5846.67	609.365	5192	816.866	3818.67	501.909	5987.33	581.318	6010.33	630.652
K01607	3098	2204	2386	7724	6612	7714	8058	8932	7370	8244	8528	7852	3956	3154	2532	2802	2150	3606	3000	2878	3338	3184	3148	2542	9630	9166	9714	10232	8770	12210	3020	2814	2958	2986	3444	2790	192746	2562.67	472.459	7892.67	671.746	3033.33	675.122	3015	280.465	9953.67	1212.62	3002	235.868
K00963	4434	3458	3446	4568	3706	4882	4904	5514	5168	5264	5178	5370	6292	4898	4114	4214	4018	3846	4036	3540	4568	5368	3272	2878	7588	7154	7274	6766	6774	8788	6968	6170	6212	7336	8096	6642	192704	3779.33	566.99	4950.44	546.9	4563.67	920.454	3943.67	913.977	7390.67	752.541	6904	734.554
K04075	4484	3506	3690	4544	4040	5022	5192	5820	4806	5542	5482	5210	6228	4592	3882	4574	5444	3910	4072	3600	4374	4832	3388	2888	6822	6638	6634	8162	7268	9440	6356	5674	5864	6546	7850	6326	192702	3893.33	519.74	5073.11	547.609	4771.67	914.141	3859	705.562	7494	1114.28	6436	766.528
K02257	5848	4668	4446	5592	4904	5674	5776	6764	5626	6046	6460	5950	6812	4838	3950	5316	5142	4522	3502	3152	4050	4572	3786	3512	5660	5228	5758	5342	5700	6884	6106	5910	5806	6294	7318	5618	192532	4987.33	753.579	5865.78	536.398	5096.67	970.003	3762.33	498.361	5762	589.017	6175.33	606.961
K01775	5072	3784	3836	4996	4376	5366	5392	5830	5268	5506	5794	5466	6086	4718	3790	5194	5292	4384	4016	3426	4178	4988	3662	3038	6688	6194	6440	7816	6842	9064	5640	5550	5444	6026	7480	5644	192286	4230.67	729.08	5332.67	439.511	4910.67	797.182	3884.67	677.855	7174	1079.8	5964	768.28
K03644	4782	3890	3740	4750	4346	5032	5110	5516	5014	5292	5962	5414	6318	4722	4178	4792	5032	4208	4232	3416	4174	5420	3980	3058	6678	6204	6524	7022	6726	8474	6238	5648	5900	6550	7882	6028	192252	4137.33	563.313	5159.56	464.055	4875	783.313	4046.67	814.402	6938	798.63	6374.33	799.375
K03215	5040	3940	4046	3996	3544	4604	4766	4932	4588	4384	4790	4810	6738	5146	4492	5500	6114	4424	4228	3470	4188	4998	3748	2810	6552	6370	6798	7584	7174	9132	6478	6150	6140	6606	7720	6068	192068	4342	606.805	4490.44	452.317	5402.33	911.215	3907	747.254	7268.33	1012.24	6527	622.008
K01843	4076	3736	3452	3948	3270	4322	4394	4560	5494	4438	4902	4124	6808	5646	5042	6744	7888	5290	3010	2514	2832	2924	2506	2196	7304	6660	6794	10732	7780	11132	6450	6032	6032	6650	6334	5992	192008	3754.67	312.419	4383.56	616.132	6236.33	1093.89	2663.67	310.492	8400.33	2004.72	6248.33	271.533
K03694	6232	4564	4810	5516	4910	5232	5506	6922	4850	5778	5836	5934	7096	5142	4826	5364	5316	5036	4138	3138	3614	4624	5230	4880	5670	5140	5204	5022	5680	6302	5720	5216	5746	5760	6282	5598	191834	5202	900.447	5609.33	626.074	5463.33	823.315	4270.67	793.498	5503	479.614	5720.33	342.642
K17228	5180	3330	3790	6608	5632	6800	6854	7430	6444	6998	7162	6750	7096	5136	4122	3996	2656	3640	3326	3208	4148	5486	3058	2574	6488	6652	7082	4786	6362	7198	5168	4712	4902	5192	6208	5158	191332	4100	963.172	6742	508.689	4441	1527.07	3633.33	1041.71	6428	868.897	5223.33	518.189
K06990	4140	3490	3420	4030	3490	4642	4560	4840	4762	4552	5278	4366	5406	4538	3706	4450	4852	3700	4036	3532	4398	3754	2972	2322	8320	7892	7868	10960	7580	11548	6606	6042	5936	6458	6638	6240	191324	3683.33	397.031	4502.22	509.277	4442	663.165	3502.33	751.755	9028	1750.26	6320	294.314
K05837	5632	4062	4494	4746	4134	4802	4754	5398	4836	5036	5586	4914	7020	5312	4382	5546	6004	4584	4134	3486	4268	5052	3864	3438	5906	5658	5898	6826	6254	7640	6364	5944	5996	5998	7278	5958	191204	4729.33	811.025	4911.78	415.562	5474.67	968.195	4040.33	597.538	6363.67	745.53	6256.33	524.683
K12510	4456	3246	3224	5120	4160	5482	5226	6136	5128	5702	5934	5810	6148	4424	3480	4296	3588	3990	3492	2874	4038	4952	3138	2336	4750	4578	4924	4490	5216	6522	9284	8092	8136	9912	10628	8226	191138	3642	705.03	5410.89	592.882	4321	969.876	3471.67	924.209	5080	752.489	9046.33	1069.57
K01759	4710	3636	3616	6998	6174	7280	6928	7968	5996	7268	7346	7096	6722	5206	4522	4862	4408	4608	3244	2996	3690	4740	3728	3382	5632	5404	5672	4762	5516	6684	5210	4668	4646	5258	5666	4788	191030	3987.33	625.928	7006	603.255	5054.67	865.037	3630	609.551	5611.67	620.993	5039.33	406.306
K03885	2468	2370	2254	7526	6558	7304	7090	8314	6564	7622	7912	7324	6484	4906	3956	4530	4166	4606	3420	3180	4048	5070	3654	3798	4448	4274	4416	4376	4684	5728	6230	5428	5564	6410	8314	5842	190838	2364	107.126	7357.11	577.18	4774.67	902.005	3861.67	663.582	4654.33	543.165	6298	1056.88
K00459	5264	3818	4030	5006	4186	5254	5110	5936	4870	5504	6032	5392	6504	4750	3978	4730	4954	4226	3618	3254	4016	5100	3866	3302	6504	6236	6516	6604	6572	8264	6080	5864	5906	6542	7334	5702	190824	4370.67	780.877	5254.44	561.501	4857	885.483	3859.33	678.105	6782.67	737.328	6238	609.261
K09955	3408	3146	2752	5366	4622	5662	5896	6608	6814	6690	6688	7120	8848	5910	4814	5910	6388	4106	2572	2444	3324	2916	1848	1452	6770	6670	6750	10792	9042	11244	4326	3858	3854	3882	4020	4148	190660	3102	330.206	6162.89	823.348	5996	1629.21	2426	685.697	8544.67	2119.85	4014.67	191.151
K06871	3938	3756	3286	3656	3482	4408	4390	4366	5070	4378	4866	4352	7342	6056	4988	5606	5054	4056	3718	3420	4352	3610	2616	1764	6498	5860	5796	7616	6688	8968	7724	7426	7020	8192	8630	7606	190554	3660	336.434	4329.78	502.748	5517	1118.73	3246.67	916.735	6904.33	1207.98	7766.33	570.518
K01902	4886	3992	3704	5494	4930	5836	5514	6274	5330	5780	6234	5744	6662	5362	4354	4866	4806	4672	3896	3324	4122	4684	4158	3914	5440	5044	5340	6168	5944	7236	5910	5574	5726	6390	7252	5900	190462	4194	616.347	5681.78	425.045	5120.33	823.031	4016.33	443.01	5862	788.407	6125.33	616.442
K09607	3524	3210	2830	5484	4860	6416	6756	6624	7624	6514	7596	7156	7220	6178	4326	5658	4148	5930	2868	2584	3604	2582	1894	1522	7102	6702	6860	6852	5712	7738	5220	5268	4958	5366	6122	5312	190320	3188	347.523	6558.89	913.355	5576.67	1166.09	2509	733.656	6827.67	658.196	5374.33	392.79
K03110	5106	3622	3884	4670	4206	5032	5176	5786	4880	5292	5384	5216	6236	4676	4146	5110	5164	4500	4162	3558	4244	5204	4116	3652	6118	6052	5892	6706	6432	8274	6576	5686	5946	6512	7014	5824	190054	4204	792.063	5071.33	452.37	4972	727.5	4156	586.396	6579	880.112	6259.67	519.624
K22390	3278	3296	2866	8430	6694	8246	8400	9176	7824	8140	8512	7572	7130	5104	3768	3410	3020	4052	2684	2398	3420	3532	2768	2754	4466	4470	4686	5352	4568	6332	5762	5244	5388	5842	6222	5226	190032	3146.67	243.231	8110.44	696.433	4414	1506.81	2926	447.921	4979	741.183	5614	395.493
K01923	4872	3710	4020	5014	4340	5034	5112	5560	4764	5340	5400	5022	6520	5034	4254	4902	5494	4230	3854	3456	4050	4842	3934	3276	6320	6078	6418	6510	6512	8086	6370	5734	5878	6568	7342	6084	189934	4200.67	601.699	5065.11	363.442	5072.33	858.28	3902	547.654	6654	719.799	6329.33	583.51
K04076	4268	3598	3556	4706	4034	5014	5482	5438	5866	5654	6324	5124	6746	5782	4556	5718	5860	4672	4932	3938	4744	3822	3558	2884	7342	6622	6750	7376	5976	8700	5024	4590	4746	5368	5654	5364	189788	3807.33	399.501	5293.56	672.161	5555.67	820.645	3979.67	761.055	7127.67	927.848	5124.33	408.919
K03569	5448	4326	4250	5128	4648	5236	5406	6208	4914	5768	6128	5942	6996	5422	4694	5686	5700	4818	4490	3734	4218	4542	4330	4028	5102	4802	5132	5758	5538	6996	5798	5130	5390	6072	6670	5332	189780	4674.67	670.803	5486.44	553.105	5552.67	826.658	4223.67	303.864	5554.67	783.47	5732	572.568
K07289	3766	3332	3230	7008	5786	6860	6898	8296	6044	6738	6704	6372	4412	3186	3008	3728	3954	3690	4832	3948	4834	4766	5126	3884	7486	7266	7306	7038	7042	9214	4046	3896	3946	3878	4002	4204	189726	3442.67	284.621	6745.11	712.684	3663	511.31	4565	518.309	7558.67	828.606	3995.33	120.184
K13010	4576	3318	3650	4900	4180	5212	5568	6566	5566	6128	6434	5484	7010	5878	4534	5082	5422	4492	4044	3414	4586	3764	3270	2800	6562	5898	5972	7538	6238	9108	5382	4938	4990	5668	6232	5272	189676	3848	651.954	5559.78	755.44	5403	948.32	3646.33	627.191	6886	1240.87	5413.67	481.909
K03684	3782	3378	2984	5074	4328	5412	5426	6052	5112	5026	5442	5392	6790	4700	3764	4862	4292	4250	4150	3646	4504	4984	3786	3080	6740	6100	6298	6662	6314	8256	6388	5556	6024	6662	8082	6372	189670	3381.33	399.01	5251.56	462.021	4776.33	1058.72	4025	672.091	6728.33	786.125	6514	857.255
K01183	4312	3448	3646	4620	3896	5328	5374	5872	5686	4840	5546	4922	5620	4374	3520	3768	4512	3602	5460	3772	4644	4044	3422	2904	8496	7742	8106	9026	7342	10608	5312	5370	4898	5308	5000	5204	189544	3802	452.632	5120.44	616.532	4232.67	793	4041	908.347	8553.33	1163.96	5182	190.989
K03379	3052	2404	2258	6648	5790	6988	6056	7242	5362	6410	6156	6686	5608	4162	3438	3686	2654	3708	3810	3380	4196	4988	3200	2926	6468	6476	6770	4678	7406	6868	6552	6132	6336	6456	7902	6524	189376	2571.33	422.622	6370.89	593.496	3876	982.962	3750	755.452	6444.33	930.79	6650.33	632.066
K01991	5772	4214	4396	4942	4036	5102	5324	6832	5230	6138	6470	6214	6566	4720	3890	5240	5670	4338	4174	3402	3552	5068	3682	3236	6276	6158	6232	7582	6898	8966	4642	4306	4396	5082	5806	4638	189190	4794	851.847	5587.56	885.996	5070.67	967.227	3852.33	675.751	7018.67	1098.65	4811.67	556.633
K03671	4760	3692	4010	4534	3888	4990	4526	5166	4732	4564	4854	4536	6352	4944	4250	5304	6496	4722	3744	3372	3844	4548	3496	2646	6726	6182	6598	8148	7216	9612	6264	5682	5738	6372	6702	5752	188962	4154	548.368	4643.33	363.948	5344.67	904.266	3608.33	624.736	7413.67	1270.13	6085	421.617
K05799	3446	2712	2788	5640	4822	6068	5980	6518	6144	6176	6954	6376	7268	5268	4148	5184	4734	4736	3568	3004	3384	3370	2932	2388	7468	7508	7476	7076	6494	10174	4776	4154	4204	5080	5948	4652	188618	2982	403.629	6075.33	596.108	5223	1078.66	3107.67	428.161	7699.33	1273.21	4802.33	662.01
K07749	4316	3364	3320	8602	7594	8398	8808	9946	7422	9442	9306	8420	5948	4464	3606	3810	2482	4434	3600	2964	4074	3922	3830	3358	4960	5028	5372	4002	5092	5886	3876	3552	3724	3856	3952	3646	188376	3666.67	562.769	8659.78	829.393	4124	1149.07	3624.67	410.041	5056.67	618.218	3767.67	152.8
K00027	3466	3342	3070	5358	4660	5592	5562	5888	5282	6202	6502	5852	6168	5064	3952	5064	4322	5234	3728	3492	4560	4672	3582	3118	5494	5276	5502	5386	6088	7032	6592	6180	6026	6760	7926	6104	188098	3292.67	202.557	5655.33	540.798	4967.33	771.849	3858.67	621.294	5796.33	667.697	6598	712.153
K12952	2858	2934	2542	5188	4848	5652	5666	5640	6538	5516	5892	5524	5482	4474	3402	3158	1952	3378	4138	3848	5150	4826	2578	2042	7502	7450	7640	5398	6382	7724	7496	6802	6496	7568	7686	6708	188078	2778	207.885	5607.11	463.869	3641	1207.93	3763.67	1230.26	7016	931.136	7126	514.289
K01153	2594	3036	2120	2674	2260	2796	2772	3182	3440	2524	2762	2798	6924	4700	4468	6754	9332	4236	2720	2418	2994	3468	1988	1620	8110	7752	7510	6786	6346	7692	9044	8328	8648	10050	13478	9472	187796	2583.33	458.093	2800.89	343.041	6069	1982.15	2534.67	673.13	7366	664.281	9836.67	1884.42
K05844	4054	3448	3202	5092	4384	5388	5162	6118	5562	5128	5300	5188	5664	4354	4020	4682	4716	4030	5278	4206	4884	5694	5002	4308	7676	7584	7686	7718	7676	9338	4240	4108	4114	4098	4154	4288	187544	3568	438.493	5258	457.319	4577.67	611.735	4895.33	568.498	7946.33	683.241	4167	78.981
K01610	6038	4334	5002	5810	5080	6232	6060	6740	6068	6198	6518	5926	7332	5750	4874	6098	6352	5322	4114	3340	3876	4362	4772	4158	4910	4072	4730	6166	5250	6528	4278	3986	3972	4326	4740	4184	187498	5124.67	858.597	6070.22	469.144	5954.67	858.541	4103.67	479.892	5276	921.083	4247.67	282.122
K03118	5604	4228	4446	4968	4246	4954	5068	5968	4994	5346	5918	5280	7210	5170	4228	5122	5704	4340	3574	3110	3742	4698	3780	3226	5840	5546	5952	6332	6118	7438	5932	5260	5326	6266	6954	5586	187474	4759.33	739.579	5193.56	526.427	5295.67	1089.09	3688.33	564.27	6204.33	659.621	5887.33	645.384
K22044	3400	2648	2522	4914	4168	4998	4852	5334	4520	4648	4766	4756	5622	4454	4196	4098	4142	3356	5214	4712	5150	6640	5018	4108	6642	5928	6432	5768	6646	7948	6742	6162	6312	6934	7384	6204	187338	2856.67	474.739	4772.89	323.548	4311.33	740.047	5140.33	838.888	6560.67	772.494	6623	484.728
K13953	4022	3130	3224	6394	5220	6188	6540	6978	5800	6918	7068	6326	5148	4590	3822	3594	2786	3470	3658	3122	4138	4230	3248	2968	6420	6018	6238	6432	5984	8078	5748	5352	5228	6012	7030	5616	186738	3458.67	490.12	6381.33	598.744	3901.67	843.707	3560.67	535.208	6528.33	782.754	5831	650.619
K07098	3966	3328	3276	4594	3920	5052	5112	5882	5604	5162	5736	5174	5538	4484	3834	4464	5336	4368	3922	3240	3880	4444	2400	1972	7236	6240	6722	8560	6742	9136	6136	5584	5544	6454	7562	6132	186736	3523.33	384.241	5137.33	603.914	4670.67	642.512	3309.67	960.067	7439.33	1150.23	6235.33	738.997
K03564	5154	3982	3896	5750	4906	6044	5754	7006	5324	6116	6306	5874	6630	4890	4268	4698	5044	4258	3772	3338	3842	4606	3664	3062	5942	5712	5980	5966	6162	7658	5168	4836	4854	5334	5884	4796	186476	4344	702.797	5897.78	593.688	4964.67	876.474	3714	526.192	6236.67	710.916	5145.33	420.555
K08264	4874	4060	4138	4430	3922	5064	5074	5044	6066	5230	5618	5086	5264	4746	3660	4102	4112	4022	4886	4082	5090	3372	2732	2116	6938	6586	7012	10320	6488	10956	5290	5054	4774	5438	5674	5074	186394	4357.33	449.143	5059.33	616.987	4317.67	580.994	3713	1186.36	8050	2024.59	5217.33	318.209
K04096	4804	3682	3586	4248	3716	4660	4638	5098	4844	4734	5130	4528	6328	4712	4220	4896	5396	3766	3926	3288	4070	4830	3310	2820	6672	6364	6766	7468	6806	9002	6422	5924	5780	6392	7312	6198	186336	4024	677.203	4621.78	435.562	4886.33	901.975	3707.33	715.653	7179.67	963.101	6338	540.557
K03424	4982	3688	3882	4396	3766	4672	4632	5364	4700	4936	5264	5000	5972	4512	3772	4746	5468	4034	4010	3324	3866	4614	3356	2798	6992	6682	7016	7750	6996	9202	5832	5620	5528	6358	6990	5548	186268	4184	697.862	4747.78	481.446	4750.67	840.786	3661.33	636.144	7439.67	933.051	5979.33	584.023
K00124	4816	4032	4292	3888	3572	4330	4874	4832	5392	4858	5698	4678	6236	4710	4180	5492	6388	4670	4060	3332	3662	3244	3200	2510	7556	6712	6938	11072	7476	11628	4820	4410	4308	4802	4850	4710	186228	4380	399.339	4680.22	672.042	5279.33	904.825	3334.67	517.628	8563.67	2188.69	4650	232.451
K24300	4354	3562	3604	4686	3976	4856	4934	5556	4928	5178	5344	4896	5928	4714	3866	4956	5310	3846	3426	3114	4042	4164	3044	2736	7116	6470	7010	6798	6486	8800	6018	5784	5770	6528	8124	6170	186094	3840	445.632	4928.22	447.361	4770	817.47	3421	573.292	7113.33	867.455	6399	890.363
K01438	4968	3580	3864	5500	4648	5464	5626	6206	5472	5678	6102	5450	6734	5050	4188	4796	5010	4436	3886	3298	3906	4166	3720	3188	6098	5896	6160	5756	6154	7304	5642	5206	5356	6008	5940	5550	186006	4137.33	733.259	5571.78	446.166	5035.67	896.747	3694	378.978	6228	550.96	5617	316.027
K00067	4038	3042	3324	4438	3744	4764	4956	5362	4896	5028	5452	5000	6360	5034	4126	4836	5984	3958	3876	3330	4338	4542	2820	2164	7118	6734	6958	7140	6468	9128	6248	5804	5642	6564	6830	5606	185652	3468	513.377	4848.89	511.426	5049.67	967.548	3511.67	917.035	7257.67	950.694	6115.67	511.868
K15633	3632	3184	2812	4024	3642	4756	4636	4736	5134	4718	5274	4940	5464	4630	3902	5068	5638	4276	4320	3800	4272	4664	3560	2890	8900	8552	8602	8782	8076	10396	4748	4316	4370	4848	5450	4566	185578	3209.33	410.587	4651.11	517.097	4829.67	681.111	3917.67	639.11	8884.67	792.39	4716.33	414.589
K01585	5638	4222	4354	4458	3928	4568	4686	5140	4628	4490	5048	4880	6794	5406	4876	5290	5944	4298	3628	3204	3530	5040	4436	3742	6182	5856	5904	5912	6460	7438	6066	5414	5750	6078	6678	5468	185434	4738	782.212	4647.33	361.177	5434.67	864.069	3930	678.492	6292	606.412	5909	471.032
K08166	2172	2096	1956	7228	6530	7264	6940	7986	6878	7448	7552	7724	5186	4002	3150	3660	2284	4268	3078	3012	3984	4692	3136	2454	6308	6506	6764	5254	6530	7602	5346	4922	4728	5876	5968	4792	185276	2074.67	109.569	7283.33	452.817	3758.33	991.036	3392.67	803.597	6494	758.182	5272	548.369
K02481	4870	3838	3876	4600	3810	4954	5142	5456	5618	5792	6360	5096	5164	4534	4176	4470	5402	4056	3780	3240	3638	2876	3794	2864	7170	6582	6630	10364	7390	11384	4814	4578	4418	4852	4740	4656	184984	4194.67	585.164	5203.11	733.402	4633.67	538.789	3365.33	432.791	8253.33	2078.63	4676.33	161.668
K00087	4268	3430	3508	7186	6438	7380	7776	8588	6882	8924	9078	7484	5412	4832	3314	3800	2844	3934	4250	3378	3846	3048	3856	3666	5524	5496	5662	6838	5544	8056	3556	3330	3122	3434	3528	3480	184692	3735.33	462.949	7748.44	925.019	4022.67	952.279	3674	418.1	6186.67	1051.01	3408.33	161.272
K01933	4438	3648	3840	4800	4324	4960	4852	5504	4372	5214	5570	5034	5974	4664	3990	4890	5398	4448	3682	2988	4212	4558	3558	3042	6244	6128	6282	7050	6662	7944	6030	5588	5500	6440	6888	5568	184284	3975.33	412.021	4958.89	436.681	4894	705.615	3673.33	625.21	6718.33	689.827	6002.33	563.805
K07059	5448	3702	4122	5698	4802	5430	5902	6662	5326	6180	6292	6114	7052	5058	3936	5400	6686	4660	3686	2858	3612	4352	4114	3172	6134	5384	5592	8064	6546	9254	3822	3508	3558	3816	4568	3768	184278	4424	911.335	5822.89	570.282	5465.33	1197.09	3632.33	559.413	6829	1522.31	3840	381.003
K01423	4954	3430	3826	4622	4438	5140	5356	6190	4698	5704	6110	4930	6218	4738	3700	4696	4774	3808	4608	3510	3872	5126	4780	4090	6706	6152	6308	6774	6376	8450	4896	4594	4650	5112	5792	4836	183964	4070	790.757	5243.11	643.531	4655.67	905.001	4331	608.795	6794.33	845.407	4980	438.738
K07588	4416	3598	3414	4800	4018	4964	4890	5432	4720	5038	5114	5038	5594	4408	3710	4422	4736	3732	4104	3636	4700	5252	3384	3076	6512	6158	6320	7066	6716	8616	6328	5814	5724	6322	6630	5458	183860	3809.33	533.383	4890.44	385.779	4433.67	700.657	4025.33	828.275	6898	899.283	6046	447.215
K03575	4438	3504	3470	4272	3588	4498	4632	5084	4640	4886	5142	4472	6070	4528	4186	4836	4934	3922	4132	3550	4174	5088	3562	2774	7068	6710	6906	6890	6714	8582	6022	5604	5488	6360	7276	5804	183806	3804	549.323	4579.33	469.988	4746	753.196	3880	780.059	7145	716.663	6092.33	657.949
K23269	4390	3362	3550	6758	5488	5928	5948	7138	5240	6698	6618	6712	5548	4318	3842	4588	3678	4560	3316	2822	3580	4574	4060	3490	3880	3698	3704	3664	4004	4852	7376	6618	6552	7788	8788	6464	183594	3767.33	547.377	6280.89	650.31	4422.33	665.617	3640.33	608.104	3967	452.88	7264.33	913.669
K24160	1946	2238	1772	4730	4290	5164	5112	5214	5254	4748	5238	5172	5092	4046	3184	3356	2342	3410	4588	4510	5604	5466	3162	2624	7356	7426	7620	5470	7010	7946	7458	6598	6564	7330	7740	6756	183536	1985.33	235.477	4991.33	330.872	3571.67	924.275	4325.67	1207.24	7138	873.414	7074.33	498.868
K22934	1872	2034	1530	7854	6600	7558	7716	9270	6234	9246	8452	8040	5296	4166	3576	4138	3020	4856	3210	3004	3742	4228	3706	3102	5030	5114	5078	4912	5694	6800	5000	4322	4468	5020	5334	4290	183512	1812	257.301	7885.56	1038.6	4175.33	826.399	3498.67	473.179	5438	720.874	4739	435.899
K05540	3676	3610	3206	4388	3570	4400	4550	5158	4962	4608	4888	4374	6206	4422	3858	5368	5998	4462	3994	3500	4004	4896	3582	2900	6338	5994	6356	6804	6728	8192	6630	6074	5714	6542	7456	5972	183380	3497.33	254.451	4544.22	460.548	5052.33	948.38	3812.67	667.387	6735.33	771.75	6398	624.217
K04090	5708	4520	4028	5580	5058	5758	5562	7098	4862	5518	5654	5580	6666	4464	4130	5122	4732	4040	3658	3060	3988	5908	4864	4596	4840	5060	5490	3508	5444	5058	5770	5422	5712	5382	6124	5230	183194	4752	863.694	5630	623.614	4859	970.441	4345.67	1002.59	4900	726.067	5606.67	326.148
K03092	6132	4226	4964	5222	4398	5404	5420	6578	5148	5566	5714	5264	6444	5002	4326	5420	6234	4502	4050	3164	3782	3786	3980	3212	5586	5178	5188	7114	6352	7662	4652	4362	4418	4752	5572	4372	183146	5107.33	961.05	5412.67	573.421	5321.33	879.437	3662.33	382.609	6180	1042.99	4688	461.71
K02492	4818	3950	3916	4258	3760	4610	4390	5070	4742	4836	5244	5010	5568	4442	3750	4708	4572	4188	4118	3278	4342	4882	4076	3288	6338	5934	6190	6642	6336	8212	6356	5790	5780	6414	7358	5822	182988	4228	511.238	4657.78	463.184	4538	607.226	3997.33	623.342	6608.67	818.517	6253.33	613.419
K26730	4116	3066	3460	4988	4374	5340	5406	5600	5998	5408	5858	5532	6854	5772	4422	5454	5462	4514	4554	3874	4562	6152	4300	4356	6250	5622	6186	5626	5808	6706	4628	4276	4326	4780	4736	4606	182972	3547.33	530.42	5389.33	480.87	5413	894.397	4633	785.155	6033	426.291	4558.67	210.484
K08884	3402	3006	2858	5876	5206	5980	5972	7012	5820	7686	8030	6506	5948	5384	4346	4318	4096	4434	3924	3204	3426	6398	3680	3224	5616	4762	4582	6454	5088	7232	4606	4190	4216	5006	5514	4712	181714	3088.67	281.264	6454.22	939.828	4754.33	736.812	3976	1218.23	5622.33	1038.34	4707.33	501.846
K03305	6278	4984	4948	2908	2484	3054	3052	3720	3456	3282	3390	3260	6588	5056	4680	6272	8016	4682	3266	2708	3288	4074	3070	2480	6084	5260	5510	10722	8262	10544	6238	5970	5974	6032	6290	5490	181372	5403.33	757.697	3178.44	356.952	5882.33	1324.51	3147.67	554.42	7730.33	2485.65	5999	284.056
K04767	4018	3178	3570	4920	4398	5268	5546	6076	5806	5450	5988	4948	7098	5632	4474	6360	6506	4734	4480	3746	3912	3590	3134	3122	6008	5530	5528	6526	4946	7888	4870	4712	4628	5182	4900	4628	181300	3588.67	420.311	5377.78	552.614	5800.67	1041.12	3664	512.684	6071	1035.92	4820	212.29
K03074	5080	3682	3640	4998	4248	5046	5054	5710	4992	5474	5380	5196	6290	4512	3574	4516	4548	4082	3636	3020	3902	4530	3684	3102	6018	5364	5448	6068	6040	7526	6190	5766	5746	6218	6952	5918	181150	4134	819.529	5122	410.524	4587	915.815	3645.67	554.319	6077.33	775.699	6131.67	449.868
K03526	4302	3560	3468	4782	4232	4756	4796	5750	4414	5338	5516	5556	5910	4384	3726	4158	4426	3884	3656	3152	3806	4082	3576	2890	5866	5626	6020	6802	6438	7810	6494	5848	6014	6328	7640	6062	181068	3776.67	457.272	5015.56	539.891	4414.67	782.156	3527	436.188	6427	796.92	6397.67	651.081
K00231	3150	2898	2482	3866	3230	3944	4026	4374	4158	4542	4594	4408	5898	4672	3886	4600	4088	4068	3662	3406	4340	4678	2564	1918	6568	6318	6834	6872	6928	8328	7906	7242	7094	7940	8644	6860	180986	2843.33	337.339	4126.89	425.392	4535.33	737.545	3428	1046.53	6974.67	701.513	7614.33	667.793
K00831	4768	3766	3824	4134	3612	4716	4218	4998	4358	4398	4800	4628	5812	4188	3932	5104	5460	4150	3682	3190	3798	5046	3550	3038	6270	6310	6540	6548	7054	8208	6344	5612	5678	6206	7216	5816	180972	4119.33	562.51	4429.11	416.595	4774.33	787.233	3717.33	712.837	6821.67	734.339	6145.33	600.13
K02851	3934	3210	3164	5016	4362	4848	5268	5750	5248	5352	5740	5402	6726	5204	3898	4454	4242	3804	3704	3182	3960	3936	2628	2312	7136	6546	6704	6988	6060	8610	5566	5502	5350	5760	5952	5356	180874	3436	431.894	5220.67	436.047	4721.33	1102.02	3287	699.135	7007.33	870.373	5581	236.7
K01616	2490	2274	2124	4150	3766	4670	4048	4608	4266	4274	4114	4870	4722	3562	3184	3296	2508	3740	3728	3468	4474	5392	3072	2434	5568	5916	5864	4590	6220	6990	9814	8478	8518	10404	10760	8414	180770	2296	183.989	4307.33	347.089	3502	732.153	3761.33	1047.96	5858	788.39	9398	1061.06
K01802	3800	3452	3122	4182	3876	4782	4540	4888	4964	4326	4626	4842	7048	5222	4660	5584	6046	4782	3962	3118	3862	4776	3388	2664	6524	6360	6486	5950	6686	8340	5560	5204	5116	5810	6248	5250	180046	3458	339.04	4558.44	365.691	5557	892.232	3628.33	739.082	6724.33	829.592	5531.33	436.093
K03518	4574	3280	3748	7176	6090	7020	7688	8726	6804	8788	9002	7548	6566	5310	3836	3978	3246	4164	3162	2842	3266	3584	2948	2726	5222	4434	4854	5636	4932	7010	3654	3288	3436	3876	4082	3506	180002	3867.33	655.202	7649.11	1003.96	4516.67	1210.09	3088	314.432	5348	907.034	3640.33	294.867
K00278	3324	3300	2652	4336	3826	4900	4594	5174	4746	5072	5204	5128	5198	4244	3840	4366	5242	4042	3582	3388	4038	4246	3046	2612	6844	6558	6684	7954	7250	9184	5930	5562	5366	6094	6860	5540	179926	3092	381.24	4775.56	460.788	4488.67	594.282	3485.33	609.688	7412.33	1004.18	5892	545.665
K06996	3956	2792	3020	5574	4840	5678	5548	6192	5210	5990	6192	5472	6274	4814	4022	4040	3722	3648	3514	3050	3878	5016	3504	3548	6200	5886	6072	5458	6224	7572	5380	5116	5186	5772	6444	5110	179914	3256	616.844	5632.89	447.052	4420	997.852	3751.67	673.222	6235.33	712.883	5501.33	524.912
K04079	4630	4240	3810	4856	3946	4680	4724	5292	4916	4650	5082	4644	6338	5078	4168	5440	6616	4440	3826	3166	3936	4338	3840	3434	6594	6376	6490	6826	6638	8106	4688	4428	4524	4820	5516	4806	179902	4226.67	410.163	4754.44	373.469	5346.67	988.549	3756.67	408.622	6838.33	639.07	4797	384.745
K16291	4520	3504	3584	5678	4518	5740	6382	7836	5564	7042	7256	6420	6560	4170	3646	4962	4972	3834	3464	2944	3718	3918	3094	2726	5694	5398	5368	3918	4888	5648	5304	5052	4846	5704	6540	5256	179668	3869.33	564.912	6270.67	1015.81	4690.67	1071.77	3310.67	465.083	5152.33	669.239	5450.33	605.77
K21397	4424	3616	3488	5264	4502	5626	5880	6118	6378	5460	6100	5786	6482	5958	5074	5140	4674	4576	3538	2846	3602	3340	2530	2382	5804	5034	5078	7084	4802	7582	5444	4984	4776	5556	5738	4932	179598	3842.67	507.501	5679.33	561.108	5317.33	751.134	3039.67	526.222	5897.33	1172.3	5238.33	391.192
K06149	4142	3288	3524	4770	4122	4932	5318	5746	5404	4892	5368	4946	5472	4694	3664	3866	4212	3438	4440	3510	3952	3592	3290	2438	7646	7104	7180	7638	6590	9612	4960	4718	4792	4984	6076	5002	179322	3651.33	441.009	5055.33	470.6	4224.33	753.407	3537	672.339	7628.33	1047.8	5088.67	497.042
K02010	4374	3250	3446	5548	4790	5788	5570	6216	4928	5814	6098	5452	7330	5386	4362	4804	4944	3920	3712	3214	3810	4660	3530	3126	5500	4992	5550	4768	5276	6374	5610	4772	5184	5804	6044	5282	179228	3690	600.413	5578.22	479.26	5124.33	1191.65	3675.33	552.226	5410	558.899	5449.33	460.958
K11072	5328	3586	3882	5212	4498	4988	4640	5422	4684	5204	5356	5268	7500	5268	4394	4906	4088	4180	3546	2872	3292	3910	4514	3664	4712	4482	4882	4440	4914	6108	6614	5818	6250	6850	7672	6110	179054	4265.33	932.121	5030.22	342.16	5056	1279.31	3633	558	4923	612.907	6552.33	659.147
K00796	4228	3440	3522	4348	3842	4736	4648	5070	4482	5070	5306	4902	5228	3884	3352	4360	4500	3780	3664	3080	3888	4666	3434	2632	6082	5528	6002	6422	6204	8304	6838	6060	6134	7122	8018	6260	179036	3730	433.225	4711.56	446.126	4184	658.211	3560.67	699.87	6423.67	967.54	6738.67	754.829
K03438	4548	3540	3662	4332	3846	4600	4654	5114	4626	4628	4836	4660	5916	4562	3854	4690	5232	3944	3752	3300	4132	4724	3338	2704	6172	6232	6284	7238	6682	8726	5972	5274	5506	5762	6256	5530	178828	3916.67	550.143	4588.44	347.672	4699.67	783.336	3658.33	708.597	6889	984.985	5716.67	355.896
K03629	4672	3448	3766	4184	3656	4570	4588	4786	4558	4546	4560	4316	6118	4410	3634	4824	5254	3890	3476	3164	3840	4916	3320	2754	6566	6338	6414	6750	6880	8310	5946	5414	5404	6386	7424	5678	178760	3962	635.103	4418.22	333.425	4688.33	917.47	3578.33	746.489	6876.33	730.922	6042	770.896
K01692	3000	2394	2300	5724	5068	5748	5900	6510	5040	5700	6010	5764	5248	4230	3568	3512	2464	3558	3294	3132	4106	4456	3150	2544	6566	6294	6486	5010	6728	7774	6058	5394	5582	6838	7836	5706	178692	2564.67	379.928	5718.22	451.554	3763.33	922.363	3447	704.076	6476.33	887.557	6235.67	935.058
K01879	5620	4436	4428	4300	3904	4892	4686	5552	4658	5350	5424	4788	5644	4124	3792	4448	4982	3730	4622	3582	4260	4948	4538	3684	5930	5688	6168	6174	6098	7554	4824	4672	4902	5048	6078	5124	178652	4828	685.904	4839.33	540.606	4453.33	743.806	4272.33	542.627	6268.67	656.075	5108	501.586
K00612	4484	3192	3422	7570	6322	6950	7482	8766	6852	7322	7820	6500	5608	4724	3840	4384	4172	3936	3488	2644	3512	2902	3798	3348	5700	5272	5288	6014	5390	6976	3394	3300	3322	3402	3662	3514	178272	3699.33	689.203	7287.11	745.34	4444	653.263	3282	428.344	5773.33	654.757	3432.33	135.271
K16092	5954	4172	4586	3380	3296	3908	3866	4736	4020	4254	4364	4112	6232	4474	4370	6016	7262	4436	3502	2786	3368	4296	3500	2734	6514	6266	6398	8314	7862	9454	4960	4592	4756	4936	5790	4786	178252	4904	932.59	3992.89	455.197	5465	1213.35	3364.33	572.217	7468	1289.57	4970	423.366
K02666	5542	4466	4546	3682	3484	4052	4562	4822	4548	4944	5220	4486	5180	4234	3630	4146	4650	3380	5324	4196	4256	4476	4446	4060	7216	6624	6648	7918	6624	8892	4510	4404	4440	4532	5330	4544	178014	4851.33	599.471	4422.22	578.057	4203.33	657.907	4459.67	451.278	7320.33	923.041	4626.67	348.858
K00406	6262	4470	4650	5488	4956	6270	6108	7092	6028	6264	7114	6382	7158	4924	4364	5048	5242	4564	3334	2652	3444	3952	3428	2828	5536	5244	5544	4156	5010	5626	4410	4120	3980	3970	4062	4230	177910	5127.33	986.763	6189.11	685.988	5216.67	1003.65	3273	469.403	5186	554.888	4128.67	168.056
K01563	4350	3256	3278	4456	3970	4500	4498	5012	4108	4578	4350	4144	6234	4812	4100	4136	2988	3108	3870	3782	4618	6768	3712	3224	6366	5854	6252	5116	6762	7356	6728	6158	5920	6616	7002	5754	177736	3628	625.367	4401.78	309.665	4229.67	1198.49	4329	1276.23	6284.33	766.099	6363	492.891
K00606	4508	3518	3850	5040	4502	5372	5554	6076	5498	5594	5688	5548	6494	4966	3958	4364	4598	4018	3448	3028	3906	4054	3328	2872	5436	5098	5406	5898	5474	6962	5672	5208	5194	5876	6452	5150	177608	3958.67	503.866	5430.22	441.779	4733	940.388	3439.33	468.855	5712.33	663.407	5592	515.341
K03519	3970	2914	3100	7382	6430	7742	7812	8620	6926	8542	8812	7914	6448	4912	3608	3966	2870	4028	3378	2724	3428	3840	3208	2804	5040	4632	5014	4808	4784	6456	3600	3472	3282	3704	3878	3526	177574	3328	563.713	7797.78	796.796	4305.33	1240.77	3230.33	417.421	5122.33	670.952	3577	203.917
K06596	6108	4752	4564	3138	2884	3830	3474	3970	3468	3006	2902	3488	6354	4476	3958	4954	5830	3698	3896	3222	3962	5168	4806	4614	7246	6992	7214	4862	7144	6610	5882	5564	5868	6070	7778	5780	177532	5141.33	842.419	3351.11	394.378	4878.33	1047.96	4278	713.4	6678	919.582	6157	810.942
K07397	5022	3402	3694	4934	4410	5048	5628	5864	5442	5458	5740	5460	6418	4800	3954	4926	4708	4462	3646	3118	3812	4678	3436	3026	6156	5816	5856	6670	5892	8048	4566	4400	4356	4774	5228	4472	177320	4039.33	863.447	5331.56	456.975	4878	828.941	3619.33	599.266	6406.33	865.235	4632.67	327.21
K06217	4862	3632	4026	4296	3882	4480	4562	4946	4372	4456	5000	4922	5432	4170	3762	4624	5094	4168	3868	3080	3764	4792	4046	3294	5616	5142	5442	6388	6008	7376	6308	5804	5732	6656	7400	5720	177122	4173.33	628.097	4546.22	362.952	4541.67	630.902	3807.33	604.088	5995.33	804.84	6270	668.796
K08679	5110	4006	3948	5070	4660	5656	5722	6460	5204	6008	6230	5980	6390	4802	3800	4788	4912	4228	3796	3376	3976	4106	3296	2810	5906	5846	5912	6010	5810	7584	4454	4094	4108	4278	4514	4246	177096	4354.67	654.78	5665.56	586.091	4820	879.27	3560	488.451	6178	692.163	4282.33	173.401
K14059	2638	1950	1996	5256	4390	5446	5336	6012	4902	5980	6020	5748	4484	3228	3082	3174	2282	3144	3124	3052	3648	4568	2656	2244	7432	7314	7570	6158	6826	9016	6678	5784	5956	6654	7418	5798	176964	2194.67	384.626	5454.44	557.317	3232.33	707.62	3215.33	813.421	7386	950.751	6381.33	650.389
K01136	2754	3040	2260	4656	3596	4572	4444	5758	4570	4546	4806	4524	6898	4894	4072	5184	5878	3858	4132	3882	5302	5696	3504	3006	6358	6492	6492	8630	9562	10178	3986	3656	3682	3892	4014	3988	176762	2684.67	394.595	4608	550.986	5130.67	1138.53	4253.67	1044.12	7952	1721.1	3869.67	161.083
K03218	4008	2980	3204	3988	3444	4412	3974	4672	4236	4270	4602	4310	6194	4394	3832	4754	5300	4058	3880	3222	4120	4766	2952	2314	6510	6338	6660	6854	6424	8776	6140	5734	5820	6440	7374	5780	176736	3397.33	540.582	4212	373.143	4755.33	875.877	3542.33	883.741	6927	924.039	6214.67	628.672
K15977	4202	3414	3358	5694	4802	5738	5976	6948	5718	6376	6526	6416	5772	4136	3708	4370	4680	3814	3552	3038	3690	4100	3346	3040	6488	6018	6354	5666	5998	7326	4294	4060	4226	4550	4906	4322	176622	3658	471.949	6021.56	628.81	4413.33	755.324	3461	409.497	6308.33	576.75	4393	297.132
K01624	4028	3360	3378	3318	2880	4156	3802	4310	4534	3810	4332	4548	5920	4326	3906	4772	5376	3998	3684	3390	4092	4054	2892	2124	6968	6476	6936	6746	6370	8192	6682	6050	6058	7340	7454	6092	176354	3588.67	380.58	3965.56	570.117	4716.33	801.508	3372.67	757.508	6948	655.096	6612.67	653.759
K21001	3528	2358	2606	4332	3436	4548	4870	5208	5094	4592	5304	4838	7424	5436	4422	4944	5378	3848	3080	2848	3540	4010	2290	1950	8042	7888	7908	6414	6424	8946	5000	4748	4872	5544	5442	5230	176342	2830.67	616.507	4691.33	569.35	5242	1226.52	2953	766.101	7603.67	997.435	5139.33	318.624
K25706	4404	3608	3414	4404	3656	4772	4656	5306	4702	4924	5308	4652	5818	4520	3812	4564	5092	3830	3880	3392	4116	4562	3272	2886	5892	6026	5966	6746	6560	8128	5600	5058	5206	5644	6202	5372	175950	3808.67	524.619	4708.89	496.657	4606	767.712	3684.67	614.448	6553	845.83	5513.67	405.118
K00791	4336	3286	3392	4116	3782	4466	4552	5320	4850	4770	4774	4912	5700	4404	3656	4594	5286	3712	3534	3138	3916	4296	2940	2622	6526	6202	6110	7502	6830	8812	5644	5262	5056	5728	6240	5500	175766	3671.33	578.053	4615.78	455.36	4558.67	823.223	3407.67	628.045	6997	1021.55	5571.67	410.678
K15270	4996	3342	3850	5350	4878	5312	5108	6324	4508	4738	4764	4742	6840	4286	3652	4900	4358	3868	4152	3294	3812	5712	4996	4356	4676	4790	4830	3924	5342	5738	5610	5130	5196	6088	6834	5364	175660	4062.67	847.26	5080.44	544.758	4650.67	1156.19	4387	861.158	4883.33	618.982	5703.67	653.656
K25010	2710	3116	2286	4348	3576	4592	4994	5900	5308	5446	6100	5126	6334	4518	3666	4318	5528	3766	2308	2016	2814	2924	1792	1604	8510	8270	8212	13112	10098	13702	3122	2984	2962	2978	2968	3164	175172	2704	415.033	5043.33	785.186	4688.33	1046.45	2243	539.866	10317.3	2498.19	3029.67	89.1149
K00404	5908	4538	4818	5112	4294	5000	5304	6200	4758	5046	5458	5216	7352	5412	4650	5560	5210	4810	3592	3174	3400	4568	4758	4086	4988	4692	5230	4284	4900	5402	4606	4270	4478	4684	4752	4500	175010	5088	723.809	5154.22	517.981	5499	972.002	3929.67	645.545	4916	397.45	4548.33	172.025
K10773	4394	3138	3362	4634	3924	4608	4758	5264	4650	5218	5406	4878	5932	4744	4034	4616	4898	4224	3584	3110	3800	4576	3356	2812	6480	5860	6032	6718	6140	8170	5008	4814	4930	5482	6188	5118	174860	3631.33	669.917	4815.56	449.614	4741.33	667.218	3539.67	615.073	6566.67	844.794	5256.67	510.272
K00639	5118	4278	3974	4362	3830	4730	4818	5052	4964	4810	5324	4918	6720	5172	4402	5554	6496	4670	3256	2782	3414	4158	3626	3266	5396	4840	4890	6924	5986	7818	5078	4640	4580	4864	5402	4620	174732	4456.67	592.558	4756.44	432.997	5502.33	947.142	3417	457.103	5975.67	1191.47	4864	324.225
K13075	3378	2588	2572	5760	5204	6078	5984	6902	6170	6594	6698	6240	5340	4142	3402	3702	2826	3656	4224	3862	4434	4406	3232	2566	6300	5662	6284	5888	5998	7898	4542	4062	3972	4420	5514	4224	174724	2846	460.795	6181.11	517.505	3844.67	850.178	3787.33	747.961	6338.33	801.628	4455.67	560.602
K11753	4454	3480	3606	4422	3782	4704	4580	5380	4582	4812	5176	4832	5432	4166	3706	4288	4924	3932	3708	3074	4002	4634	3284	2632	6366	5706	5942	6872	6120	8178	5812	5014	5404	5736	6532	5182	174456	3846.67	529.726	4696.67	456.507	4408	649.18	3555.67	713.328	6530.67	900.287	5613.33	545.442
K01938	5850	4524	4418	4564	4172	4622	4612	5290	4590	5132	4822	4900	6118	4366	3976	4878	4630	4156	3356	2816	3564	4590	4200	3868	5032	4830	4924	5116	5794	6234	6106	5266	5382	5836	6370	5412	174316	4930.67	797.928	4744.89	334.418	4687.33	771.753	3732.33	629.657	5321.67	562.411	5728.67	447.152
K22516	3484	2486	2832	4386	3962	5218	5560	5502	6346	4988	5028	4848	4172	3750	2874	3476	3176	3610	5564	4502	4942	3470	3274	2394	7932	7306	7508	11172	7952	12874	3176	3184	3008	3506	3446	3380	174288	2934	506.758	5093.11	691.492	3509.67	452.339	4024.33	1180.6	9124	2322.41	3283.33	191.092
K01698	4010	3462	3324	4598	4242	4862	4606	5262	4452	4978	5030	4686	5974	4462	3794	4700	4436	4170	3668	3368	3898	4816	3574	3202	5926	5428	5730	5680	6014	7006	5838	5132	5226	6362	6712	5498	174126	3598.67	362.846	4746.22	316.178	4589.33	745.341	3754.33	573.075	5964	549.985	5794.67	634.943
K11752	3732	3146	3024	4392	3656	4764	4726	5158	4148	5080	5162	4762	4916	3764	3182	3982	4214	3432	4036	3344	4106	5014	3320	2966	6140	5796	6042	6500	6642	8014	6162	5646	5584	6068	7510	5740	173870	3300.67	378.494	4649.78	505.35	3915	614.698	3797.67	742.561	6522.33	793.013	6118.33	720.128
K00334	4592	4084	4056	3956	3388	4332	4354	4704	4464	4246	4670	4278	6598	4908	4166	4822	4834	3824	3794	3386	3932	4400	3282	2714	6456	5832	6050	6376	5778	8068	5572	4920	5022	6162	6436	5286	173742	4244	301.702	4265.78	399.044	4858.67	957.078	3584.67	586.236	6426.67	850.138	5566.33	617.058
K03551	4808	3730	3838	4624	3992	4740	4824	5066	4240	4978	5106	4742	6004	4648	3824	4518	4674	4198	3902	3008	3696	4312	3690	2910	5424	5106	5150	6052	5978	7596	5940	5222	5362	5926	6420	5302	173550	4125.33	593.668	4701.33	373.068	4644.33	739.96	3586.33	536.825	5884.33	929.908	5695.33	474.99
K07304	4676	3416	3712	5256	4350	5244	5248	5790	5058	5640	6012	5412	5900	4410	3538	4372	4734	3928	3540	3066	3612	4934	3584	3060	5604	5192	5512	4812	5528	6698	5364	4752	4852	5460	6192	5038	173496	3934.67	658.852	5334.44	478.716	4480.33	811.116	3632.67	686.135	5557.67	631.697	5276.33	527.57
K07552	5164	3672	3872	5334	4792	6100	5632	6344	5364	5686	5518	5812	6126	4130	3758	4510	3878	4122	3042	2642	3100	4558	3170	2654	5400	5494	5822	3982	4734	5302	5746	4854	5026	6066	6804	5150	173360	4236	809.869	5620.22	452.667	4420.67	874.465	3194.33	705.594	5122.33	661.545	5607.67	745.148
K08305	3788	3110	2832	5738	4696	5676	5862	7172	5374	5866	5918	5774	5250	3362	3150	3456	3416	3222	4372	3558	4198	4596	4140	3202	6648	6104	6742	5280	6176	7322	4508	4090	4374	4802	5062	4380	173216	3243.33	491.749	5786.22	644.495	3642.67	796.015	4011	526.089	6378.67	695.415	4536	345.749
K08234	4316	3122	3246	5516	5076	5724	6012	6770	5334	6120	6278	6022	5794	4472	3526	4102	3294	3614	3356	2950	3706	4886	3174	2826	5994	5562	5818	4620	5772	6796	4924	4412	4598	5182	5612	4630	173156	3561.33	656.495	5872.44	517.994	4133.67	918.317	3483	754.385	5760.33	702.903	4893	444.747
K00631	5636	4274	4448	3170	2774	3566	3702	3952	3822	3692	3666	3318	4760	3818	3354	3450	4216	2658	4858	3744	4846	6312	4532	4318	5004	4934	4894	5552	6070	6922	6930	6380	6730	7074	9094	6644	173114	4786	741.245	3518	368.061	3709.33	730.922	4768.33	860.801	5562.67	807.432	7142	985.725
K01969	5100	3980	4000	4906	4268	4994	4874	5824	4644	5258	5156	5072	6804	5346	4456	5322	5638	4736	3542	2766	3466	4422	4338	4112	4110	4050	4082	4994	5066	5628	5300	5070	5048	5534	6312	4844	173062	4360	640.937	4999.56	427.546	5383.67	820.645	3774.33	635.137	4655	666.626	5351.33	526.769
K00370	6460	5276	5436	5398	4702	5294	5316	6614	5274	7128	7608	6522	6420	4854	4056	4608	4296	4890	1732	1336	2102	1404	2104	2118	1584	1324	1572	1248	1518	1862	8938	8430	8370	9652	9640	7864	172950	5724	642.396	5984	1002.86	4854	832.146	1799.33	363.724	1518	217.322	8815.67	727.595
K02315	2660	2718	2306	4392	3692	4460	4634	5190	4760	4234	4608	4510	5472	4342	3690	4140	4482	3484	3990	3710	4164	3340	3120	2754	8204	7756	7686	7520	6364	8758	5286	5040	4862	5560	5738	5056	172682	2561.33	223.019	4497.78	404.7	4268.33	702.284	3513	538.628	7714.67	799.089	5257	336.905
K01191	2726	2940	2410	2690	2306	2844	3098	3484	3612	2938	3252	3114	7464	5852	4552	6274	6230	3896	3228	3300	4024	4360	2454	1890	7474	6896	6858	9576	7774	10406	5792	5386	5608	6148	6134	5674	172664	2692	266.631	3037.56	401.268	5711.33	1289.71	3209.33	928.165	8164	1480.67	5790.33	302.092
K01041	4494	3052	3266	6320	5510	6702	6354	7406	5410	6620	6536	6134	6134	4246	3398	3804	2776	3774	2958	2598	3346	4106	3232	2884	4844	4608	4868	3934	4996	5280	5630	5292	5062	5856	6146	4936	172512	3604	778.154	6332.44	610.382	4022	1145.57	3187.33	522.118	4755	458.268	5487	471.835
K00215	3774	2962	2824	5330	4794	5442	5264	6164	4728	5834	6110	5792	4752	3582	3210	3784	3448	3592	3534	3100	3868	4244	3150	2790	6344	5830	6360	5810	6612	7598	5328	4880	4864	5434	6296	4938	172366	3186.67	513.304	5495.33	523.45	3728	536.33	3447.67	540.423	6425.67	656.343	5290	549.126
K04655	3848	3188	3102	3866	3576	4318	4674	4846	5144	4614	5034	4588	5156	4354	3534	4204	4718	3756	3860	3450	4160	3896	2826	2336	7430	6934	7082	7892	6750	9370	5080	4740	4712	5142	5208	4900	172288	3379.33	408.149	4517.78	519.21	4287	600.212	3421.33	706.62	7576.33	967.273	4963.67	210.927
K06915	4544	3360	3860	4840	4178	5206	4950	5860	4520	5014	5132	5580	6338	4716	3800	5312	5500	4450	3150	2452	2992	3560	3222	2836	5772	5654	5562	4538	5132	5614	5624	5106	5302	5900	7008	5328	171912	3921.33	594.378	5031.11	507.633	5019.33	889.775	3035.33	375.542	5378.67	466.278	5711.33	693.613
K10232	3278	2908	2928	4436	3954	5380	5086	4832	5408	5266	5182	5226	7402	5348	4266	4334	3184	3768	3366	3412	4052	4920	2506	2110	5356	5168	5426	4334	4950	5802	6172	6130	5824	6842	7280	6032	171868	3038	208.087	4974.44	488.336	4717	1497.21	3394.33	1019.8	5172.67	499.362	6380	558.471
K01739	3656	3288	2812	3894	3516	4276	4266	4680	4564	4286	4476	4432	6106	4954	3884	4920	4242	3978	3834	3528	4438	5254	3412	3100	5168	5014	5234	4916	5894	6844	6808	6164	6126	6756	7134	5960	171814	3252	423.15	4265.56	359.381	4680.67	834.795	3927.67	792.345	5511.67	737.426	6491.33	470.378
K01620	4522	3570	3608	4358	3462	4720	4852	5198	4598	4842	5386	4778	6366	4618	3998	4676	4824	4022	3398	2956	3702	4134	2856	2194	6210	5848	5696	7024	6450	8432	5204	4770	4764	5366	5532	4854	171788	3900	539.003	4688.22	550.808	4750.67	864.328	3206.67	686.033	6610	1009.23	5081.67	331.207
K01534	2594	2936	2298	5090	4428	5660	5796	6190	6064	5840	6358	5536	7424	6030	4480	6354	6698	5082	2634	2524	3236	2864	1688	1492	5246	5148	4824	4816	4178	5854	4994	4902	4776	5910	6634	5132	171710	2609.33	319.276	5662.44	595.846	6011.33	1076.43	2406.33	680.513	5011	557.05	5391.33	728.896
K00075	4106	3332	3368	3690	3370	4158	4512	4672	4484	4562	4882	4574	5832	4256	3760	4400	4872	4032	3436	2910	3800	4592	3300	2614	6070	5670	6120	6486	6248	7950	6160	5420	5422	6220	6750	5582	171612	3602	436.848	4322.67	493.985	4525.33	740.934	3442	698.494	6424	793.693	5925.67	538.248
K00766	4170	3236	3546	4190	3728	4358	4386	4792	4562	4812	4776	4438	5284	4248	3542	4308	4354	3584	4040	3380	4044	4936	3458	3034	6084	6066	6222	6026	6228	7426	5664	5298	5378	6166	6574	5230	171568	3650.67	475.716	4449.11	347.924	4220	636.044	3815.33	676.216	6342	537.596	5718.33	541.572
K02282	5306	3708	4088	5826	4918	6352	6270	7116	6426	6722	6964	6496	7244	5422	4114	5272	4506	4640	2750	2438	3076	3302	2752	2222	4092	3534	3750	3818	3888	5290	5098	4384	4554	4962	5494	4620	171414	4367.33	834.818	6343.33	657.688	5199.67	1114.18	2756.67	396.698	4062	628.462	4852	411.444
K02621	5312	3966	4354	3876	3572	4164	4132	4954	4008	3854	3882	4108	6258	4324	3870	4992	6290	3900	3906	3104	3256	5044	4368	3810	6350	5908	6290	5800	6630	7192	4916	4780	4716	4970	5894	4640	171390	4544	692.823	4061.11	381.83	4939	1110.7	3914.67	718.743	6361.67	507.545	4986	461.448
K07028	4208	3336	3166	4996	4392	4990	5138	5980	4430	5032	5078	4908	5456	4376	3498	3814	3706	3332	4180	3398	3978	4582	3844	2970	6100	5832	5992	5242	6066	7652	5764	5016	5036	5396	5634	4864	171382	3570	559.024	4993.78	459.531	4030.33	784.226	3825.33	572.048	6147.33	802.006	5285	367.469
K02234	1900	1706	1518	4204	3572	4222	4526	5074	4272	4138	4426	4302	4582	3598	2884	2766	2374	2862	4178	3962	4406	4716	3192	2386	9898	9338	9480	7528	7910	10582	5160	4704	4760	5066	6112	5030	171334	1708	191.008	4304	393.415	3177.67	793.734	3806.67	865.357	9122.67	1176.3	5138.67	509.361
K07798	4936	4262	3826	4426	3506	4424	4434	5676	4778	4976	5636	4904	5896	4464	4092	6116	7840	4520	3284	2994	3428	3520	3192	2454	5816	5240	5494	6282	5978	7230	4710	4390	4686	4330	4348	4594	170682	4341.33	559.236	4751.11	668.644	5488	1416.13	3145.33	385.364	6006.67	701.446	4509.67	173.825
K07407	3372	4000	2826	3390	2908	4176	4252	4540	4900	4426	4856	5266	6646	4490	3884	4832	5062	4104	2726	2438	3298	3494	2090	1730	6508	6322	6342	8258	7616	9356	5348	5030	4942	5682	6250	5284	170644	3399.33	587.477	4301.56	746.591	4836.33	988.841	2629.33	684.163	7400.33	1239.83	5422.67	482.03
K00127	6522	4628	4732	4350	3968	4946	5254	5690	5406	5776	6348	5172	6776	4872	4092	5334	5244	4076	3338	2572	3274	3136	3010	2468	5416	4968	5330	5640	5080	6908	4308	4162	4290	4534	4590	4368	170578	5294	1064.75	5212.22	727.96	5065.67	999.402	2966.33	365.328	5557	703.982	4375.33	160.398
K00936	3168	2416	2524	3982	3720	4394	4434	4784	4500	3734	3978	4106	7504	5720	4156	8342	8450	7160	3366	3238	3880	4186	2414	1844	5490	5060	5166	4994	4914	6360	5332	4974	4918	5930	6282	5112	170532	2702.67	406.592	4181.33	366.318	6888.67	1663.46	3154.67	884.059	5330.67	542.632	5424.67	557.95
K03668	2542	2108	2066	3372	3062	3976	3910	4064	4576	3674	4024	3738	7946	5946	4554	5024	4540	3614	3290	3202	4070	3564	2248	1676	7716	7076	7112	5372	5552	7632	6518	6064	5766	6592	7858	6474	170518	2238.67	263.532	3821.78	434.224	5270.67	1514.36	3008.33	883.851	6743.33	1027.83	6545.33	716.959
K12410	4050	3002	3344	4562	4074	4926	5102	5730	5014	5306	5516	5148	5844	4784	3990	4344	4714	4094	3814	3206	3986	3668	2988	2532	5526	5138	5152	6914	5856	8418	5054	4430	4666	5008	5622	4942	170464	3465.33	534.432	5042	495.507	4628.33	675.758	3365.67	555.04	6167.33	1282.32	4953.67	404.179
K01551	3340	2536	2498	3970	3448	4146	4012	4334	4156	4076	4268	4082	5900	4152	3606	4062	3466	3372	3424	3146	4270	5244	2792	2028	6254	5822	6102	6342	6632	8042	6882	6154	6340	7374	8044	6118	170434	2791.33	475.539	4054.67	255.045	4093	940.195	3484	1134.2	6532.33	786.446	6818.67	771.451
K11473	4846	3842	3880	4632	4046	4986	5134	5564	5168	5330	5562	5034	6042	4406	3732	3880	4104	3530	4236	3452	4036	4306	3710	2884	5912	5880	6206	4740	5498	6562	5052	4554	4676	5148	4986	4664	170220	4189.33	569.007	5050.67	476.026	4282.33	913.703	3770.67	541.281	5799.67	629.163	4846.67	245.163
K14728	4854	3088	3392	6228	5650	6586	6266	6900	6106	6850	7228	6380	6038	4582	3580	3178	1900	3176	2834	2632	3230	3912	2922	2500	5962	6332	6556	4662	5864	6658	4074	3792	3860	3974	4418	4016	170180	3778	944.159	6466	478.324	3742.33	1416.68	3005	510.599	6005.67	729.701	4022.33	219.547
K03431	4286	3244	3462	4264	3982	4888	4734	5360	4230	4970	5150	5038	5026	3862	3392	3868	3970	3828	3640	3028	4128	4634	3492	2934	5750	5608	5716	5774	5728	7644	5984	5228	5066	6090	6716	5428	170142	3664	549.585	4735.11	471.324	3991	545.675	3642.67	651.31	6036.67	789.5	5752	624.101
K00014	4690	3734	3728	4604	3904	4918	5054	5240	5102	4928	5484	4882	6014	4300	3384	4216	3974	3420	3498	3038	3572	4466	3226	2740	6200	5958	6034	6030	5936	7682	4858	4558	4622	5166	5820	4872	169852	4050.67	553.687	4901.78	447.523	4218	961.69	3423.33	594.844	6306.67	680.114	4982.67	463.238
K01745	5466	3770	4138	3658	3202	4062	4052	4460	3896	4180	4182	4044	6630	5054	4750	5430	6322	4490	2850	2364	3022	3288	3038	2668	5234	4850	4794	7480	5772	7968	5754	5124	5260	5808	6992	5518	169570	4458	892.135	3970.67	360.979	5446	862.729	2871.67	323.504	6016.33	1376.77	5742.67	668.045
K02653	5156	3884	4090	4716	4082	4794	4528	5496	4414	5218	5642	5442	5840	4522	3762	4194	4612	3396	3630	3050	3596	4256	3942	3776	5474	5048	5358	6394	5568	7386	4742	4378	4664	4830	4974	4702	169556	4376.67	682.737	4925.78	545.835	4387.67	847.35	3708.33	402.809	5871.33	867.026	4715	198.683
K14415	5148	4204	4330	4970	4590	5384	5266	5844	5410	6170	6292	5588	5896	5212	4584	4484	4648	4620	3688	3126	3634	3806	3344	3218	4938	4450	4564	5876	5088	6752	4134	3828	3738	4074	4206	3786	168890	4560.67	512.532	5501.56	546.298	4907.33	548.426	3469.33	277.499	5278	880.609	3961	200.383
K07071	4154	2972	3080	4334	3636	4388	4620	5106	4472	4918	5244	4650	6720	4928	4194	4614	5000	3978	3166	2860	3332	4130	2566	2076	5840	5074	5728	7094	6016	8296	5148	4866	4988	5432	6322	4874	168816	3402	653.486	4596.44	479.07	4905.67	975.019	3021.67	703.363	6341.33	1159.89	5271.67	556.304
K01174	3122	2160	2498	4516	3760	5104	4722	5470	4580	4834	5130	4758	5550	4170	3476	4040	3322	3380	3262	2792	3582	4126	2914	2106	6118	5616	5858	5412	5534	7376	6858	6122	5996	7000	7422	6086	168772	2593.33	488.034	4763.78	481.932	3989.67	842.736	3130.33	696.164	5985.67	726.166	6580.67	592.875
K00121	3350	2848	2810	6522	5844	6328	6392	6890	5418	6804	6360	6056	6300	4540	4108	4392	3170	4462	3298	2700	3454	4356	4022	3714	4682	4560	4734	3712	5012	5240	4360	3832	4082	4450	5574	4292	168668	3002.67	301.399	6290.44	462.172	4495.33	1017.56	3590.67	580.45	4656.67	524.386	4431.67	601.959
K00339	4528	3590	3546	4206	3590	4434	4588	5366	4504	4738	4944	4764	6500	4686	3894	5012	4316	4116	3372	2844	3636	3748	2958	2302	5532	5550	5540	5008	5112	6604	6192	5152	5322	6076	6758	5478	168506	3888	554.693	4570.44	494.396	4754	944.266	3143.33	546.337	5557.67	565.083	5829.67	615.532
K08963	4750	3702	3746	4272	3660	4518	4670	5252	4582	4906	5282	4378	5734	4554	3842	4460	4238	3924	3842	3026	3938	4100	3456	2938	6430	6064	6308	7234	6532	8610	4416	3938	4036	4438	4502	4214	168492	4066	592.77	4613.33	504.316	4458.67	685.625	3550	489.135	6863	941.608	4257.33	232.602
K01772	4564	3688	3798	3948	3484	4302	4206	4594	4164	4622	4524	4478	5788	4264	3920	4426	4432	3626	3594	3222	3768	5850	3474	2954	5656	5358	5612	4920	5698	6452	5992	5272	5362	6096	6874	5470	168452	4016.67	477.185	4258	366.265	4409.33	745.076	3810.33	1039.36	5616	501.641	5844.33	607.567
K01880	4194	3318	3312	4368	3660	4592	4184	4986	3994	4402	4458	4652	6272	4640	3824	4660	4972	3958	2976	2658	3596	4436	3340	3126	5256	4656	5048	5918	5720	7092	5974	5770	5664	6292	6860	5536	168364	3608	507.5	4366.22	386.811	4721	879.279	3355.33	617.86	5615	854.917	6016	490.937
K02340	3944	3252	3324	3794	3390	4072	4326	4470	4252	4062	4652	4344	5438	4142	3322	4296	4490	3506	3922	3346	3832	4746	3094	2588	6158	5584	5954	6472	5930	7816	6110	5622	5488	6210	6854	5556	168358	3506.67	380.449	4151.33	379.402	4199	759.189	3588	750.287	6319	789.317	5973.33	526.006
K03524	4424	3602	3496	4426	3490	4622	4586	5240	4536	4910	5188	4986	5362	4148	3528	4338	4474	3614	3478	2968	3558	4270	2866	2536	6146	5656	5932	6480	6012	7590	5402	4754	4764	5486	6356	4984	168208	3840.67	507.954	4664.89	527.932	4244	667.897	3279.33	619.494	6302.67	686.043	5291	607.44
K01081	4164	3130	3150	3898	3804	5250	4622	5062	5154	4830	4568	5448	6986	5314	4520	4978	4048	4688	2954	2626	3540	4052	2636	2368	5684	5574	5814	5138	5912	6134	5358	5208	4870	5436	6238	4870	168026	3481.33	591.291	4737.33	578.041	5089	1022.72	3029.33	642.97	5709.33	339.926	5330	504.89
K05516	3864	3286	3124	4444	3906	4900	5002	5502	5122	4822	5172	4912	5292	4328	3336	3702	3798	3242	4314	3518	4276	4478	3464	2922	6812	6482	6788	6536	6314	8740	4128	3878	3882	4238	5228	4212	167964	3424.67	389	4864.67	459.217	3949.67	762.459	3828.67	617.872	6945.33	899.352	4261	499.207
K25557	3532	2586	2912	6438	5542	6124	6166	6752	5796	6990	7336	6172	6848	5556	4270	4450	3852	3862	2968	2670	3338	3906	2830	2588	5626	5324	5582	4212	4608	6020	3956	3586	3650	3936	4092	3748	167824	3010	480.554	6368.44	572.765	4806.33	1178.77	3050	495.711	5228.67	683.645	3828	197.176
K08167	1652	1672	1410	6374	5406	6304	5916	6468	5750	6236	6034	6330	5518	4090	3468	3224	2308	3634	2330	2234	3290	3532	1900	1692	4672	4604	4680	3588	4368	5202	7222	6642	6828	7856	8446	6664	167544	1578	145.836	6090.89	347.331	3707	1065.77	2496.33	748.54	4519	531.527	7276.33	732.86
K07709	3554	3136	3258	4174	4238	4984	5632	5738	6208	5938	6718	5342	4392	4516	4060	3576	4318	4108	4844	3890	4156	2900	3456	2670	5890	5130	5350	9542	6916	10528	2946	2812	2950	3156	2988	3124	167138	3316	214.951	5441.33	855.998	4161.67	334.445	3652.67	812.375	7226	2283.01	2996	126.902
K03453	3522	3138	2794	4054	3784	4472	4642	5146	4992	4508	4930	4714	5554	4514	3442	4862	4876	3856	3468	3060	3676	3788	2702	2180	6380	5960	6252	5274	5342	6998	5342	4974	5042	5576	7592	5676	167082	3151.33	364.183	4582.44	441.798	4517.33	763.653	3145.67	622.002	6034.33	657.035	5700.33	967.866
K00549	3406	2226	2652	10214	8882	10252	10080	12048	8260	11414	10684	10046	5420	4024	2980	2800	1904	3668	1940	1588	1926	2460	3056	3236	3040	3390	3610	2358	3438	3540	1930	1850	1796	2104	2658	2092	166972	2761.33	597.549	10208.9	1154.57	3466	1207.47	2367.67	666.66	3229.33	470.286	2071.67	313.191
K09013	4830	3452	3920	4946	4306	5026	4886	5618	4584	5274	5332	4944	6028	4484	3902	4550	4404	3950	3460	2854	3530	4734	3848	3392	4770	4362	4446	4590	5160	6114	5398	4698	4824	5388	5784	4918	166706	4067.33	700.715	4990.67	393.836	4553	773.305	3636.33	626.709	4907	655.692	5168.33	420.117
K02687	4456	3624	3640	3894	3570	4312	4742	4746	4746	4740	5362	4748	5480	4182	3588	4162	4612	3530	4132	3498	4052	4082	3184	2492	6524	5806	6034	7446	6292	8856	4224	4208	3856	4476	4644	4210	166150	3906.67	475.804	4540	535.587	4259	722.837	3573.33	652.152	6826.33	1144.49	4269.67	269.543
K15725	4284	3682	3760	4884	3966	5086	5178	6170	4952	5668	5608	5322	4898	4038	3500	5466	6464	4222	2690	2440	2902	3002	2560	2276	4786	4534	4608	6502	5800	7248	4892	4332	4414	4852	6102	4852	165940	3908.67	327.379	5203.78	616.314	4764.67	1078.82	2645	276.02	5579.67	1126.95	4907.33	633.715
K11751	5716	4272	4248	3110	2720	3648	3512	3858	4066	3288	3490	3064	6840	5446	4488	5286	5676	3970	3910	3600	4192	5188	3174	2604	5494	5076	4974	7270	5910	7622	5132	4430	4828	5152	5562	4820	165636	4745.33	840.708	3417.33	419.032	5284.33	996.118	3778	889.01	6057.67	1130.88	4987.33	385.303
K02517	4840	3744	3780	3788	3354	4306	4296	5002	4304	4658	5054	4324	4918	3454	2964	3816	5042	3042	4172	3454	3742	3624	3502	2656	6842	6406	6456	7042	6066	7906	4674	4518	4540	4308	5888	5018	165500	4121.33	622.644	4342.89	539.749	3872.67	911.508	3525	497.238	6786.33	647.267	4824.33	571.451
K00955	3138	3090	2502	5090	4540	5146	4996	5990	4738	4826	4908	5344	6870	4480	4094	4926	4418	3922	2602	2368	3142	3892	2988	2332	4852	4636	4914	4216	5704	5658	5888	5228	5482	6266	6566	5470	165222	2910	354.153	5064.22	419.781	4785	1078.62	2887.33	590.569	4996.67	583.946	5816.67	519.076
K13668	2866	2106	2172	4186	3506	4230	4440	4864	4340	4726	4504	4060	5284	4042	3454	3488	3128	2884	3314	3112	4054	4384	2896	2526	6302	5848	6282	5606	5978	7534	6674	6198	5990	7040	7202	5990	165210	2381.33	421.029	4317.33	397.746	3713.33	862.955	3381	707.395	6258.33	678.571	6515.67	533.781
K00145	4282	3578	3484	4382	3800	4440	4570	5468	4374	4934	5248	4688	5496	4030	3330	4330	4310	3396	3738	3178	3954	4876	3226	2668	5482	5446	5878	5110	5754	6690	5214	4822	4848	5200	5880	4886	164990	3781.33	436.13	4656	503.674	4148.67	790.572	3606.67	769.266	5726.67	542.323	5141.67	401.886
K06044	2188	1988	1952	5570	4596	5772	5730	7072	5586	6902	6704	6340	4612	4180	3552	3464	2644	3732	3454	3006	3228	3390	2920	2110	5380	5278	5650	6036	5304	7554	4962	4518	4654	5078	5416	4356	164878	2042.67	127.143	6030.22	792.005	3697.33	671.694	3018	491.282	5867	874.377	4830.67	393.781
K03517	3270	3128	2668	4264	3660	4460	4358	4968	4160	4844	4830	4670	5266	3772	3298	4410	4488	3886	3310	2936	3472	3946	3348	2838	5738	5520	5792	6216	6026	7684	5592	5330	5290	5606	6460	5338	164842	3022	314.687	4468.22	413.027	4186.67	686.69	3308.33	398.705	6162.67	783.165	5602.67	442.109
K01420	4920	3734	3814	5072	3972	5044	5066	6310	4738	4750	4894	5080	6126	3958	3530	4974	5438	3468	3232	2684	3424	4332	3694	2740	6338	5984	6496	4210	5086	5712	4568	4088	4122	4484	4548	4084	164714	4156	662.851	4991.78	605.447	4582.33	1096.12	3351	619.308	5637.67	859.679	4315.67	240.414
K01491	4110	3148	3482	4438	3748	4864	4554	4994	4548	4836	5124	4964	5860	4474	3640	4614	4944	3888	3430	2968	3356	4266	3442	2816	5148	4864	5194	5448	5334	6476	5252	4704	4816	5508	6356	4974	164582	3580	488.43	4674.44	417.551	4570	793.114	3379.67	505.916	5410.67	558.03	5268.33	608.348
K18888	2432	2480	2092	3514	3246	4336	4184	3956	4940	4024	4370	4542	6076	4790	3902	5088	4288	4176	2882	2820	3864	3662	1762	1170	6374	5724	5814	6076	5272	7874	6348	5822	5930	7062	7568	6094	164554	2334.67	211.521	4123.56	516.097	4720	791.296	2693.33	1053.41	6189	903.765	6470.67	696.251
K14647	4762	3520	3498	3424	2834	4006	3884	3852	3940	4564	4516	4512	9862	7556	5944	6894	6386	4968	2930	2350	3110	2960	2428	2342	4988	4406	4416	4380	4386	5728	5290	4900	5154	5180	5416	5116	164402	3926.67	723.504	3948	564.855	6935	1679.72	2686.67	349.909	4717.33	548.819	5176	173.708
K09822	1836	2086	1454	1950	1572	2004	1936	2336	2028	1794	1964	2042	4450	3714	2864	4018	4392	2684	4122	3764	4736	6798	3592	2700	7578	7590	7834	5848	7418	7702	8434	7872	7764	8806	9016	7302	164000	1792	318.289	1958.44	204.154	3687	758	4285.33	1400.65	7328.33	738.316	8199	662.107
K21703	3870	2822	3066	3922	3348	3850	4014	4422	3948	4200	4610	4392	6134	4426	3728	5194	5040	3798	3406	3078	3360	3790	2944	2284	7164	6914	7404	6132	6226	8470	4766	4466	4402	5136	4638	4550	163914	3252.67	548.37	4078.44	378.328	4720	921.635	3143.67	513.142	7051.67	859.638	4659.67	266.306
K00099	4112	3130	3074	4240	3684	4540	4598	4948	4268	4876	5072	4706	5322	3862	3150	3680	3978	3386	3388	2946	3640	3982	3072	2380	5624	5270	5300	6284	6000	7306	5762	5278	5356	5708	6596	5114	163632	3438.67	583.796	4548	431.487	3896.33	762.185	3234.67	563.304	5964	767.176	5635.67	533.237
K22108	3996	2596	3178	4908	4144	5146	4866	5560	4940	4776	5074	4928	5370	4240	3280	4408	4266	3876	2926	2750	3418	3906	2586	2222	5802	5616	5848	6308	5964	7962	4658	4466	4478	5208	5388	4528	163586	3256.67	703.307	4926.89	372.559	4240	687.007	2968	605.652	6250	869.525	4787.67	405.138
K03177	4154	3414	3352	3918	3346	3990	4382	4784	4320	4532	4850	4520	5586	4118	3526	4168	4764	3460	3600	3218	3486	4358	3122	2386	6072	5598	5740	6110	5678	7648	5296	4862	4884	5452	6038	4748	163480	3640	446.215	4293.56	474.061	4270.33	802.376	3361.67	647.294	6141	767.697	5213.33	488.324
K03324	5128	4304	4160	3518	2842	3568	3420	4160	3480	3228	3442	3360	4964	3526	2966	3478	4198	2626	3984	3354	4088	5458	4380	3966	7142	7110	7594	5696	6618	6516	5154	4574	4908	5058	6306	5074	163348	4530.67	522.292	3446.44	344.863	3626.33	846.75	4205	699.212	6779.33	659.323	5179	589.217
K07568	3962	3250	3078	4290	3908	4816	4900	5154	4878	4714	5192	4986	5974	4622	3848	4610	5296	3814	3310	2998	3602	4094	3126	2502	5996	5560	5528	6882	6102	7976	4010	3722	3844	4086	4706	3974	163310	3430	468.683	4759.78	415.108	4694	837.038	3272	543.198	6340.67	939.466	4057	343.143
K01735	4668	3222	3424	4368	3630	4500	4348	5332	4072	4514	4662	4766	4962	3544	3208	3780	4364	3452	3688	2976	3688	4990	3402	2996	5440	5168	5278	5964	5784	6666	5650	4918	4978	5344	6372	4942	163060	3771.33	783.077	4465.78	468.974	3885	657.646	3623.33	739.962	5716.67	554.428	5367.33	569.945
K01676	3874	3394	2964	3438	3212	3976	4178	4370	4190	4166	4360	4332	5494	3864	3530	3840	3382	3568	2766	2552	3268	3622	2480	2294	5378	5220	5572	5376	5636	6906	7092	6330	6240	7170	8658	6326	163018	3410.67	455.229	4024.67	418.92	3946.33	780.807	2830.33	511.915	5681.33	618.366	6969.33	923.197
K03315	2554	2018	1988	2892	2698	3640	3636	3486	4098	3194	3670	3242	4776	4114	2892	3082	3278	2752	4082	3938	4798	4490	2714	2054	8196	8110	8522	6984	7150	9368	5400	5394	5270	5754	6782	5996	163012	2186.67	318.473	3395.11	432.847	3482.33	794.541	3679.33	1068.76	8055	886.683	5766	566.331
K03446	2578	2040	2054	6800	6168	7064	6736	7728	6380	6718	6888	7016	4036	3184	2508	2996	2076	3602	2884	2736	2918	2888	2890	2044	5696	5600	5720	7210	6230	7906	3366	3242	3342	3814	4466	3368	162892	2224	306.653	6833.11	441.879	3067	712.528	2726.67	340.643	6393.67	954.024	3599.67	468.841
K01464	4526	3646	3648	5446	5026	5684	5636	6632	5498	6148	6450	5856	6540	4884	3924	4476	3486	4124	3352	2858	3650	3948	3724	3530	4680	4124	4546	4922	4840	6316	3548	3234	3358	3424	3714	3346	162744	3940	507.492	5819.56	511.306	4572.33	1075.14	3510.33	376.22	4904.67	746.311	3437.33	170.264
K05275	3096	2302	2550	4710	4200	5532	5372	6054	5158	5676	6246	5582	4166	3340	2488	2764	2278	3150	3124	2608	3358	3732	2550	2258	6042	5730	5900	6620	5754	7978	5788	5044	4986	5712	5974	4872	162694	2649.33	406.213	5392.22	636.893	3031	682.79	2938.33	559.156	6337.33	867.099	5396	480.455
K02291	3176	2606	2550	3772	2972	4040	3968	4590	3978	3834	4448	4128	5760	4130	3258	4462	4460	3770	3182	2802	3730	4864	2694	2328	6234	5866	5944	5542	6048	7410	6174	5574	5662	6414	6668	5618	162656	2777.33	346.389	3970	460.505	4306.67	846.019	3266.67	916.327	6174	647.203	6018.33	466.374
K07258	3986	3224	3290	4918	4042	4930	5018	5768	4570	4990	4946	4946	5870	4124	3576	3740	3482	3284	3338	2734	3482	3918	3214	2652	4434	4332	4478	3524	4250	4792	6272	5492	5952	6462	8502	5852	162384	3500	422.18	4903.11	450.816	4012.67	952.856	3223	475.095	4301.67	423.648	6422	1073.42
K08218	5172	3812	3916	3182	2786	3356	3416	3932	3262	3280	3682	3316	6634	4622	3806	5372	5966	3608	3388	2716	3166	4384	3458	2726	6466	5990	6116	7240	6726	8324	4614	4316	4464	4620	5748	4726	162308	4300	756.962	3356.89	318.793	5001.33	1203.97	3306.33	615.794	6810.33	866.778	4748	510.314
K02523	4252	3458	3436	4304	3728	4146	4278	4898	4448	4568	4946	4612	5766	4326	3404	4336	4890	3726	3426	3026	3544	3628	3090	2644	5798	5368	5578	5926	5742	7360	5240	4344	4650	5114	5398	4776	162174	3715.33	464.897	4436.44	379.117	4408	843.983	3226.33	374.152	5962	711.518	4920.33	398.48
K06153	4396	3388	3398	4370	3558	4220	4226	4982	4196	4736	4762	4392	5670	4400	3500	4452	4736	3778	3042	2742	3256	4126	2684	2316	5030	4868	5000	5502	5464	6824	5602	5242	5040	5920	6970	5230	162018	3727.33	579.104	4382.44	417.449	4422.67	764.5	3027.67	626.875	5448	722.271	5667.33	711.444
K01535	772	792	706	5726	4692	5828	5962	6974	6456	6064	6768	6262	2560	2494	1730	2242	1828	2680	3184	3024	2864	2814	3128	2046	8898	8304	8242	9066	7536	11498	3378	3326	3148	3636	3572	3472	161672	756.667	45.0037	6081.33	668.637	2255.67	397.213	2843.33	416.355	8924	1372.76	3422	177.214
K00412	5840	4026	4710	4560	4022	4886	5074	5642	5142	5038	5230	5440	7028	4980	4016	4676	4716	4214	3908	2736	3236	3828	3600	3538	4504	4284	4596	3578	3970	4552	4464	4320	3946	4686	4340	4226	161552	4858.67	916.092	5003.78	480.716	4938.33	1082.78	3474.33	432.419	4247.33	401.63	4330.33	246.237
K00161	3486	2956	2978	4302	3780	4756	4638	5256	4490	4972	5058	5004	6404	5054	4268	4630	4576	4436	3128	2776	3424	4194	3162	2546	4704	4378	4476	4276	4728	5734	5420	4934	5046	5764	6114	5496	161344	3140	299.847	4695.11	455.435	4894.67	784.622	3205	574.836	4716	529.539	5462.33	440.697
K07259	3662	2966	2746	3778	3168	3848	3642	4186	3346	3684	3612	3786	4896	3764	3362	3712	3674	3138	3298	2694	3496	4948	3298	2672	5862	5406	5922	6690	6242	7742	6666	5980	6046	6764	7058	5516	161270	3124.67	478.169	3672.22	292.476	3757.67	607.531	3401	831.233	6310.67	820.745	6338.33	582.507
K02886	5230	3586	3914	4166	3794	4434	4350	4786	4324	4510	4398	4414	6132	4338	3914	4682	4960	4044	3388	2728	3222	4004	3198	3090	4516	4444	4798	5312	5200	6308	5240	4780	4684	5378	6052	4866	161184	4243.33	870.074	4352.89	267.569	4678.33	811.777	3271.67	421.026	5096.33	689.452	5166.67	511.221
K00763	4228	2802	3224	4882	4272	4786	5366	5560	4850	5234	5316	5160	6262	4648	3726	4798	4722	4322	3302	2616	3328	3632	3242	2508	4060	4022	4070	4824	4476	5850	5050	4792	4516	5192	6598	4900	161136	3418	732.527	5047.33	390.482	4746.33	840.395	3104.67	442.847	4550.33	709.906	5174.67	734.498
K02259	4786	3536	3758	4592	4096	4666	4610	5296	4036	4814	5072	5070	6090	4170	3610	4182	4030	3742	3092	2792	3290	4744	3356	2644	5056	4860	5054	4168	5092	5530	5550	5000	4890	5358	5470	5022	161124	4026.67	666.904	4694.67	428.642	4304	905.007	3319.67	750.695	4960	446.686	5215	278.136
K03527	3916	3190	3194	4774	3920	4696	4866	5476	4578	5030	4970	4806	5254	3592	3088	3534	3436	3254	3404	2888	3356	4018	3390	2584	4906	4620	5088	5406	5586	6662	5806	4952	5108	5930	6338	5368	160984	3433.33	418.006	4790.67	414.964	3693	787.019	3273.33	493.094	5378	717.517	5583.67	531.069
K02528	4318	3046	3222	3966	3408	4258	4008	4734	3878	4418	4576	4178	5010	3972	3268	4464	4858	3604	3198	2844	3516	4084	3052	2628	5788	5236	5638	6320	5586	7698	5430	5052	4956	5464	6024	4980	160680	3528.67	689.224	4158.22	400.744	4196	697.78	3220.33	520.511	6044.33	883.73	5317.67	411.908
K02837	4652	3894	3788	3634	3226	3858	3682	4146	3506	3314	3454	3710	6272	4554	4528	5144	5418	4032	3906	3260	3696	5194	4100	3696	5594	5414	5570	4088	5512	5618	4996	4836	4690	5258	5800	4628	160668	4111.33	471.221	3614.44	281.648	4991.33	796.457	3975.33	659.28	5299.33	597.886	5034.67	438.349
K02548	4220	3184	3560	3648	3454	4284	4444	4348	4566	4184	4442	4160	5426	4542	3700	4150	4270	3734	3508	3040	4054	3784	2716	2340	5542	5266	5220	6360	5462	7298	5544	4958	4740	5506	5892	5078	160624	3654.67	524.448	4170	376.828	4303.67	637.199	3240.33	656.495	5858	817.286	5286.33	431.547
K22083	2834	2342	2116	4730	3720	4560	4476	5180	3992	4628	4386	4344	4254	3372	2930	3380	2876	3322	4574	4098	5010	6130	5504	4910	5670	5548	6002	5172	6650	7112	4408	3786	4244	4394	5442	4396	160492	2430.67	367.12	4446.22	420.361	3355.67	494.018	5037.67	710.73	6025.67	728.544	4445	543.15
K03771	5182	3728	4044	4134	3568	4308	4174	4984	4242	4504	4780	4566	5436	3654	3280	4554	6236	3702	3306	2702	3250	3758	3216	2580	5964	5702	5812	7558	6414	8400	3816	3502	3882	3638	4050	3852	160478	4318	764.746	4362.22	412.078	4477	1160.21	3135.33	431.896	6641.67	1096.7	3790	193.2
K03802	3504	3116	2600	3992	3122	3546	3752	4510	3400	3660	3906	3784	5324	3812	3302	4534	4840	3208	3298	2686	3304	5366	3688	3560	5360	4900	4984	4510	5492	6104	7174	6348	6478	6564	6766	5970	160464	3073.33	453.508	3741.33	391.724	4170	862.571	3650.33	908.528	5225	554.452	6550	404.627
K01711	3792	2860	3020	4544	4072	4646	4934	5496	4816	4922	5308	5048	5984	4550	3746	4598	4642	3968	3078	2798	3100	3928	2946	2358	5370	5030	5266	5636	5280	6610	4640	4222	4364	4914	5258	4704	160448	3224	498.365	4865.11	421.035	4581.33	780.56	3034.67	514.964	5532	563.1	4683.67	374.314
K21416	4506	3174	3348	5082	4472	5370	5756	6092	5656	6860	6824	6090	6114	5086	3732	3622	2842	3674	2842	2722	3278	3476	2618	2274	4654	4236	4666	4620	4246	5790	4280	4146	4068	4538	5136	4404	160294	3676	724.047	5800.22	776.87	4178.33	1193.27	2868.33	441.609	4702	569.062	4428.67	385.996
K02477	5422	3594	4014	2378	2248	3004	3064	3040	3384	2766	2942	3030	6058	3998	3588	5174	8216	3946	3052	2606	3012	4152	2660	2310	6888	6328	6234	9162	7512	9348	4864	4236	4424	4556	4662	4364	160236	4343.33	957.466	2872.89	356.925	5163.33	1757.32	2965.33	643.378	7578.67	1377.77	4517.67	225.376
K06281	5444	4510	4108	3200	2708	3072	3348	3476	3596	3364	3790	3344	6302	4770	4016	4798	4914	3586	3858	3426	4006	4144	3720	3224	5758	5768	5754	5128	5818	6864	5252	4920	4934	5322	4962	5020	160224	4687.33	685.426	3322	311.272	4731	930.569	3729.67	350.002	5848.33	561.229	5068.33	174.225
K00338	4710	3634	3754	4378	3720	4362	4780	5030	4500	4722	4900	4722	6630	4816	4244	4386	3984	3958	3034	2460	3020	3386	3126	2660	4720	4338	4380	4120	4486	5744	5664	5266	5036	5932	6156	5452	160210	4032.67	589.648	4568.22	390.242	4669.67	1010.21	2947.67	333.825	4631.33	579.256	5584.33	417.981
K13688	5498	4742	4536	5392	4498	5522	5836	6710	5704	6462	6810	5774	9778	7782	5800	6004	5340	5420	1784	1394	1906	1684	1840	2278	4448	4402	4272	4204	2678	4648	2938	2488	2556	3348	3042	2612	160130	4925.33	506.527	5856.44	725.251	6687.33	1756.49	1814.33	289.356	4108.67	717.586	2830.67	336.004
K25182	2462	2388	2064	4814	4230	5412	5804	5998	5730	5512	6242	5412	4286	3540	2710	3846	3988	3684	2548	2288	3014	2760	2254	1582	7282	6434	6616	8176	6310	9442	3842	3562	3798	4256	4146	3638	160070	2304.67	211.682	5461.56	615.397	3675.67	538.527	2407.67	496.212	7376.67	1226.26	3873.67	275.589
K15268	5360	3348	3946	4054	3242	4320	4572	4712	4562	4662	5194	4586	6032	4510	3418	3654	3508	3514	3536	2988	3368	3618	2956	2186	5748	5328	5572	6150	5436	7636	4314	4392	4386	4728	5946	4364	159846	4218	1033.21	4433.78	541.255	4106	1025.52	3108.67	528.861	5978.33	861.69	4688.33	633.693
K08483	3302	3060	2730	4416	3978	4626	4908	5266	4788	5162	5630	5426	4184	3618	3108	3414	3782	3316	3296	2958	3710	3088	3472	2870	6328	5894	5778	7142	6216	8598	4252	4222	4080	4606	4514	4068	159806	3030.67	287.126	4911.11	522.385	3570.33	381.193	3232.33	321.57	6659.33	1063.97	4290.33	223.376
K00852	4226	3078	3304	4334	3816	4898	4810	5470	5050	5006	5636	5066	5864	4460	3680	3950	3328	3488	3064	2754	3484	4136	2304	2144	5878	5910	5646	4926	5240	6788	4684	4078	4244	4776	5712	4360	159592	3536	608.148	4898.44	551.292	4128.33	938.713	2981	748.913	5731.33	642.998	4642.33	586.625
K22373	3788	3312	3012	3854	3516	4602	4866	5054	5504	5204	5568	4980	5080	4584	3482	4108	4062	3882	3736	3218	4050	3044	2264	1844	6672	6394	6388	6634	5554	8588	3686	3722	3490	3872	3952	3932	159498	3370.67	391.312	4794.22	701.107	4199.67	559.645	3026	844.705	6705	1007.36	3775.67	177.392
K00162	3808	2732	3236	4622	4112	4848	4842	5708	4788	5276	5446	5404	6120	4820	4042	4754	4420	4218	2940	2576	3264	3804	3400	2452	4460	4194	4572	4084	4624	5642	5240	4856	4580	5318	5718	4566	159486	3258.67	538.358	5005.11	495.451	4729	744.628	3072.67	515.385	4596	554.566	5046.33	457.572
K16137	3666	2474	2786	6604	5768	6596	6534	7714	5698	6452	6650	6748	4984	3514	2928	3244	2910	3414	3516	3106	3786	4408	3434	2700	4868	4548	4542	3664	4420	5430	3650	3230	3532	3636	4162	3570	158886	2975.33	618.143	6529.33	586.577	3499	768.201	3491.67	584.07	4578.67	578.37	3630	302.213
K03705	4582	3632	3414	4146	3688	4388	4408	4774	4218	5084	5038	4630	5610	4286	3556	4198	3996	3664	3318	2798	3464	4314	3204	2744	5108	4972	5082	4762	5084	6100	5110	4814	4916	5460	5656	4596	158814	3876	621.054	4486	448.038	4218.33	739.883	3307	570.172	5184.67	466.532	5092	402.025
K02055	5168	3672	3952	6394	5414	6176	5664	6914	5316	5774	5790	5784	6998	4732	4150	4316	3504	3994	3000	2180	2694	3544	3386	3386	3418	2876	3238	2894	3442	4148	4516	4090	3996	4842	5164	4226	158752	4264	795.306	5914	502.621	4615.67	1234.34	3031.67	520.374	3336	467.733	4472.33	458.414
K02357	4406	3538	3630	3972	3488	4360	4404	5074	3932	4616	4782	4466	5388	3924	3448	4536	4690	3758	3148	2830	3240	4132	3204	2546	5120	4728	4802	5496	5148	6868	5178	4574	4598	5362	6114	4876	158376	3858	476.806	4343.78	481.966	4290.67	714.431	3183.33	535.891	5360.33	788.149	5117	579.663
K20971	2486	2386	2046	3614	3976	6126	5134	5562	5260	4096	4278	5922	4800	4340	3108	3526	3504	4760	3234	2846	3616	2648	2782	1828	7058	6712	6856	7228	5782	8436	4258	3876	3986	3940	4078	4266	158354	2306	230.651	4885.33	915.771	4006.33	721.015	2825.67	603.421	7012	860.672	4067.33	164.544
K01354	5344	4210	4284	4024	3418	3856	3946	4728	3810	3982	4010	4068	6614	4502	4236	5262	5258	4276	2828	2558	3074	4628	3010	2338	4418	4174	4398	4202	5152	5436	5620	4986	5018	5638	5922	5028	158256	4612.67	634.433	3982.44	341.195	5024.67	904.702	3072.67	810.86	4630	531.415	5368.67	406.778
K01470	4176	3060	3438	4928	4310	5148	5192	6092	4996	5244	5660	4838	5974	4850	4096	3850	3590	3640	3670	3088	3568	3932	3200	2716	5182	4778	4858	6128	5618	6994	3456	3284	3298	3686	4026	3616	158180	3558	567.595	5156.44	504.187	4333.33	925.411	3362.33	442.908	5593	851.237	3561	279.928
K00658	5234	3832	3918	3936	3406	4048	3934	4512	3824	4170	4296	4254	6072	4454	3852	5526	6234	4168	3532	2678	3102	3908	3680	3164	5098	4990	5352	5552	5518	6434	4350	3944	3974	4110	4954	4132	158142	4328	785.796	4042.22	320.488	5051	1023.84	3344	447.405	5490.67	513.511	4244	376.493
K05896	4048	3108	3270	4288	3394	4134	4268	4988	3924	4626	4698	4302	5458	4252	3582	4360	4156	3662	3264	2820	3340	4018	3012	2412	5392	4912	5150	5472	5462	7020	5350	4588	4754	5372	6176	4924	157956	3475.33	502.515	4291.33	464.797	4245	674.095	3144.33	543.123	5568	743.612	5194	575.166
K00620	3194	2790	2572	4226	3644	4388	4562	4890	4432	4868	4756	4748	4814	3802	3302	3560	3380	3428	3184	2922	3354	3972	2894	2432	5626	5566	5800	5156	5572	6450	5566	5172	5268	5682	6858	5114	157944	2852	315.601	4501.56	394.234	3714.33	566.49	3126.33	519.257	5695	426.169	5610	651.068
K24995	3438	2708	2698	5016	4174	5416	5636	6342	5582	5766	5862	5892	7096	5070	4096	4028	3660	3442	3246	2852	3494	3904	2530	2084	4804	4654	4862	5008	4860	6096	3894	3732	3624	4150	4206	3940	157862	2948	424.382	5520.67	621.027	4565.33	1360.11	3018.33	663.568	5047.33	526.234	3924.33	227.429
K08591	4266	3232	3314	3346	2940	3760	3660	3972	3808	3772	4214	3718	5736	4384	3706	3962	3988	3066	3446	2934	3652	4040	2630	2084	5872	5750	5686	6084	5628	7840	5776	5216	4982	5672	6146	5190	157472	3604	574.773	3687.78	364.37	4140.33	894.804	3131	718.744	6143.33	846.788	5497	440.023
K01704	3922	3314	3106	4566	4190	4934	4970	5586	4604	5360	5484	5240	5498	4020	3282	4372	3772	3512	3152	2668	3382	3744	3016	3000	4812	4222	4724	4728	4312	6172	4886	4512	4572	5236	5582	4834	157286	3447.33	424.025	4992.67	470.491	4076	794.202	3160.33	368.457	4828.33	701.555	4937	408.041
K01462	4146	3380	3382	3590	3288	3666	3948	4422	3504	4294	4450	4158	5074	3866	3318	4128	4452	3406	3402	2826	3596	4418	2942	2524	5012	4852	5198	5844	5392	7056	5500	5068	5266	5922	6690	5230	157210	3636	441.674	3924.44	429.524	4040.67	663.349	3284.67	678.461	5559	809.877	5612.67	605.36
K18887	2354	2344	1996	3604	3484	4552	4288	4200	4992	3728	4222	4430	5704	4632	3488	4960	4374	4034	2890	2632	3836	3314	1752	1188	5850	5462	5814	5782	5034	7328	5640	5362	5090	6370	6654	5730	157114	2231.33	203.866	4166.67	486.435	4532	765.464	2602	983.406	5878.33	774.853	5807.67	596.709
K00931	3450	3094	2692	4336	3420	4278	4440	5154	4208	4280	4542	4640	5032	3894	3262	4020	3640	3628	3332	2712	3462	4514	3158	2688	5386	5222	5450	4918	5632	6622	5340	4934	5028	5356	6036	5106	156906	3078.67	379.233	4366.44	456.671	3912.67	607.211	3311	669.446	5538.33	582.923	5300	397.997
K00118	4602	3562	3740	3518	2858	3500	3606	4588	3742	4256	4442	3968	6732	5162	4076	4568	5310	3554	2864	2640	3458	3602	2386	2060	5282	4798	4964	6962	6732	7616	4778	4264	4440	4642	4774	4764	156810	3968	556.227	3830.89	542.974	4900.33	1113	2835	602.911	6059	1190.42	4610.33	213.764
K05825	2332	2322	2236	4756	4216	4904	4986	5374	4806	4920	5252	4792	5572	4218	3558	4674	4950	4242	3144	2696	3576	3048	2354	2190	5168	4834	4612	5906	4954	7336	4816	4488	4414	5172	5454	4526	156798	2296.67	52.7763	4889.56	328.729	4535.67	693.942	2834.67	520.891	5468.33	1016.87	4811.67	421.178
K01908	4240	3386	3304	3836	3608	3988	3820	4278	4008	3816	3984	3864	5462	3922	3328	4304	4052	3474	3322	2974	3490	4214	3910	3380	5076	4814	5258	4526	5146	5694	5890	5028	5466	6270	6206	5396	156734	3643.33	518.353	3911.33	184.494	4090.33	763.93	3548.33	444.239	5085.67	397.626	5709.33	493.005
K00332	4594	3464	3478	3844	3456	4008	4070	4586	3798	4414	4562	4532	6044	4334	3528	4062	3678	3550	2982	2710	3142	3928	3144	2678	5084	4872	5292	4808	4986	5970	5656	5202	5476	5730	5896	5064	156622	3845.33	648.402	4141.11	403.189	4199.33	957.486	3097.33	454.61	5168.67	428.012	5504	320.447
K11071	5110	3572	3804	4800	4300	4592	4212	5030	4328	4436	4504	4790	6964	4574	4146	4330	3502	3714	3026	2542	3186	2988	3836	3338	3864	3532	3886	3408	4106	4958	5484	5018	5210	5974	6020	5098	156182	4162	829.147	4554.67	272.307	4538.33	1251.88	3152.67	428.597	3959	551.343	5467.33	439.763
K16148	2744	2352	2124	4266	3710	5134	4854	5444	4984	4718	5252	4968	5268	4048	3176	4142	3744	3492	3064	2528	3474	3768	2448	1742	5420	4926	4976	4832	4646	6178	5756	5096	5248	5916	6402	5242	156082	2406.67	313.594	4814.44	533.115	3978.33	725.266	2837.33	744.296	5163	559.332	5610	504.555
K10804	4554	3524	3462	4572	4114	4864	5408	6146	5060	5514	5892	5416	4864	3468	2926	3682	4194	3272	2888	2454	2868	3714	2866	2340	5188	5108	5190	5766	5482	7106	4018	3762	3774	3968	4432	4106	155962	3846.67	613.353	5220.67	638.82	3734.33	696.888	2855	482.76	5640	758.923	4010	247.519
K00859	3568	2814	2932	3972	3600	4308	4518	4774	4606	4478	4556	4590	5410	3774	3252	4364	4222	3638	3214	2710	3424	3936	2814	2238	5580	5170	5456	5926	5566	7422	5072	4384	4574	4852	5606	4610	155930	3104.67	405.573	4378	369.129	4110	753.512	3056	597.025	5853.33	805.988	4849.67	440.853
K05350	2846	2586	2382	3988	3488	4968	4254	4540	4846	4528	4766	5464	6714	5040	4252	4810	4212	4550	2602	2528	3116	3886	1648	1578	4562	4538	4840	3962	4212	5508	5712	5154	5112	6334	6848	5470	155844	2604.67	232.563	4538	578.25	4929.67	930.458	2559.67	879.348	4603.67	537.561	5771.67	690.789
K03787	4092	3204	2978	3962	3552	3772	4048	4846	4268	4354	4600	4284	5826	4678	3720	4864	5362	3828	3336	3088	3214	3806	2822	2378	6032	5404	5766	6888	5488	7660	4106	3592	3524	3900	4518	3676	155436	3424.67	588.871	4187.33	402.198	4713	831.056	3107.33	482.808	6206.33	890.151	3886	376.723
K03590	4382	3594	3550	3732	3430	4094	4218	4804	4320	4526	4970	4672	5642	4404	3580	4570	5684	4010	2980	2604	2980	3376	3254	2802	5284	4926	4954	6372	5186	7340	4222	3732	3848	4264	4970	4088	155364	3842	468.171	4307.33	502.615	4648.33	857.277	2999.33	283.799	5677	972.713	4187.33	436.346
K00311	4834	3594	3704	4388	4006	4568	4522	5306	4080	4574	4756	4512	5106	3846	3098	3916	3730	3278	3432	2490	3018	4170	3962	3510	4968	4490	4794	4612	4888	6090	4696	4336	4398	4736	5822	4822	155052	4044	686.367	4523.56	379.784	3829	705.174	3430.33	614.877	4973.67	574.558	4801.67	536.053
K09760	4280	3112	3128	3820	3174	3988	3766	4262	3778	3848	4152	3960	4500	3196	2780	3612	4238	3222	3298	2834	3574	4464	3378	2534	5546	5412	5506	5868	5956	7104	5754	5042	5266	5754	5712	5038	154856	3506.67	669.774	3860.89	308.453	3591.33	662.607	3347	667.341	5898.67	628.086	5427.67	352.292
K02863	4444	3378	3708	3934	3716	4330	4052	4728	3912	4362	4462	4400	5478	4068	3606	4136	4526	3720	3322	2672	3226	3750	3346	2848	4636	4078	4400	5168	4838	6308	5150	4840	4656	5570	6298	4720	154786	3843.33	545.734	4210.67	323.923	4255.67	682.015	3194	385.188	4904.67	781.458	5205.67	632.574
K07056	4618	3388	3552	3780	3188	3690	3816	4182	4024	3840	4060	3956	5186	3796	3214	4458	5006	3468	3182	2922	3486	4006	2760	2252	5422	5008	5256	6232	5572	7658	4832	4516	4484	5150	6062	4628	154650	3852.67	667.851	3837.33	288.182	4188	819.606	3101.33	607.113	5858	973.311	4945.33	599.922
K00943	3848	3012	3114	4554	3820	4576	4324	5304	4344	4890	4786	4516	5304	3932	3454	4052	3824	3596	2940	2588	3172	4076	2742	2356	5066	4742	4822	5552	5388	6672	4848	4406	4458	5148	5422	4766	154414	3324.67	456.08	4568.22	413.08	4027	662.673	2979	606.524	5373.67	709.32	4841.33	393.293
K18691	4122	3222	3058	3258	2738	3516	3936	4072	3986	3944	4116	3848	3618	2970	2758	2842	4012	2354	4280	3258	3892	3488	3836	3598	7708	7130	7500	7320	7022	8878	4188	4124	3976	3792	3998	3960	154318	3467.33	572.857	3712.67	458.747	3092.33	609.37	3725.33	357.385	7593	676.467	4006.33	138.509
K19294	3104	2276	2300	4844	4004	4962	5236	6006	5346	5148	5576	5152	5448	4312	3376	5054	5632	4098	2632	2146	2578	3542	2612	2402	5678	5310	5664	6082	5726	7708	3364	3116	2998	3520	3896	3436	154284	2560	471.271	5141.56	547.915	4653.33	872.502	2652	472.887	6028	858.725	3388.33	317.632
K00939	4222	3326	3496	3772	3340	4004	3976	4538	3946	4172	4556	4288	5488	4094	3386	4098	4738	3536	3368	2578	3420	4230	2820	2392	5782	5440	5626	5834	5742	7142	4498	4196	4266	4862	4802	4136	154110	3681.33	475.884	4065.78	381.323	4223.33	783.614	3134.67	677.652	5927.67	611.21	4460	313.79
K02527	4292	3178	3312	3908	3444	4038	4408	4976	4312	4360	4606	4362	4380	3356	2976	3480	4416	3036	3726	2846	3274	3866	3184	2636	5902	5498	5754	7544	6294	8704	3882	3658	3544	3928	4766	3954	153800	3594	608.187	4268.22	435.29	3607.33	641.146	3255.33	479.793	6616	1251.19	3955.33	429.164
K03640	5668	4022	4916	3514	2998	3496	4044	4454	3752	4250	4384	4056	4746	3324	2866	4602	6450	3558	3456	2568	2990	4134	3018	2332	5384	4872	5082	7914	6474	8332	3708	3496	3734	3516	3960	3628	153698	4868.67	824.02	3883.11	481.391	4257.67	1300.87	3083	645.884	6343	1490.97	3673.67	170.479
K00286	3692	3050	2756	3680	3194	4060	4122	4372	3864	4234	4340	4274	5266	3924	3256	4142	4178	3350	3258	2924	3622	4110	2938	2310	5466	5050	5108	5130	5336	7014	5332	4656	4780	5362	6092	5036	153278	3166	478.661	4015.56	382.533	4019.33	725.834	3193.67	623.895	5517.33	749.868	5209.67	517.301
K18303	3072	2340	2420	4202	3448	4208	4584	5046	4154	5026	5454	4792	4386	3196	2914	3274	3964	2816	4560	3858	4314	6978	4392	4312	6386	6190	6470	5266	6226	6712	2948	2632	2850	2848	4104	2888	153230	2610.67	401.524	4546	608.14	3425	619.885	4735.67	1122.91	6208.33	498.469	3045	529.706
K03389	5126	3944	3996	3374	3266	3980	4174	4198	4878	3900	4394	3868	5978	5108	3688	4092	4002	3586	3634	2844	3484	2676	2480	1832	5958	5908	5728	6276	4548	7470	4210	3978	3746	4494	4310	4092	153220	4355.33	667.923	4003.56	494.209	4409	939.539	2825	665.792	5981.33	941.01	4138.33	261.871
K07093	2878	2474	2256	3824	3378	4056	3608	4934	3438	3564	3660	4102	8000	5146	5208	6106	6420	4296	2580	2270	2798	4302	2700	2264	4450	4404	4758	3078	4330	4552	5252	4844	4706	5818	7450	5304	153208	2536	315.601	3840.44	480.864	5862.67	1291.1	2819	759.004	4262	598.683	5562.33	1004.09
K01858	3780	2956	3146	4744	4004	4918	4906	5426	4794	5128	5446	4824	4926	3744	3176	3400	2802	3564	3102	2710	3106	3750	3120	2494	4664	4004	4340	4622	4494	6004	5290	4578	4752	5598	6054	4794	153160	3294	431.477	4910	428.719	3602	726.204	3047	430.214	4688	687.515	5177.67	573.629
K01965	4922	3876	3836	4034	3514	4012	4150	5016	3844	4046	3938	4122	4840	3490	3062	3662	2886	3100	3178	2914	3914	4926	3528	2968	4394	4406	4718	3766	4756	5104	6070	5440	5288	5876	6196	5124	152916	4211.33	615.78	4075.11	401.039	3506.67	714.215	3571.33	762.264	4524	454.587	5665.67	441.801
K03592	4816	3468	3726	3530	3050	3678	3610	4298	3432	4408	4218	3822	4512	3890	3078	3530	3748	3354	3744	3144	3610	4980	3500	3322	5374	5274	5462	6182	5774	7066	4762	4362	4250	4768	4760	4372	152874	4003.33	715.515	3782.89	448.894	3685.33	496.378	3716.67	654.032	5855.33	678.731	4545.67	242.274
K07696	3888	3272	3204	4394	3960	5110	5432	5450	5716	5254	5734	4736	5556	4526	3354	4188	4294	3836	3168	2668	3362	2546	2072	1768	5430	4710	4940	5168	4276	6750	4012	3694	3700	4306	4256	4104	152834	3454.67	376.815	5087.33	608.999	4292.33	741.762	2597.33	613.478	5212.33	850.528	4012	265.67
K06402	3858	2830	2868	4454	3654	4468	4470	5222	4304	4468	4604	4366	6454	5082	3996	5078	4332	3986	3212	2828	3594	4022	2804	2370	4526	4150	4266	4162	4384	5714	4780	4244	4384	5034	4946	4582	152496	3185.33	582.856	4445.56	400.402	4821.33	939.982	3138.33	598.723	4533.67	595.42	4661.67	313.487
K01803	3798	2930	2968	3968	3400	4086	4302	4662	4122	4180	4518	4094	4876	3756	3126	4106	4108	3576	3130	2834	3360	4178	2816	2532	5212	4888	4874	5708	5260	7058	4924	4656	4612	5172	5900	4800	152490	3232	490.538	4148	357.976	3924.67	593.197	3141.67	582.1	5500	821.899	5010.67	480.324
K03928	2430	2218	1974	2638	2390	3034	3214	3088	3868	2954	3284	2922	6336	4414	3728	4126	3826	2934	3648	3374	3964	4052	2300	1814	7076	6812	7134	5706	5976	7706	5642	5296	5122	6044	6202	5156	152402	2207.33	228.187	3043.56	415.789	4227.33	1146.71	3192	924.25	6735	756.198	5577	463.932
K00331	4048	3618	3222	4044	3622	4134	4238	4460	4134	4460	4838	4380	5688	4438	3758	4034	3510	3946	2786	2516	3118	3240	2850	2516	4966	4894	4814	4542	4850	6014	5252	4944	4638	5244	5788	4732	152276	3629.33	413.117	4256.67	338.068	4229	778.367	2837.67	300.073	5013.33	511.152	5099.67	421.992
K16703	3138	2216	2518	5030	4086	5108	5306	6172	4820	5506	5530	5258	5226	3962	3358	4020	4318	3384	3466	2970	3438	4422	2918	2630	5272	4982	5104	4154	4288	5698	4120	3710	3520	4262	4312	4036	152258	2624	470.051	5201.78	568.403	4044.67	690.752	3307.33	633.859	4916.33	592.113	3993.33	314.934
K00760	4102	3174	3270	4108	3618	4366	4268	4588	4420	4826	4814	4504	5344	4188	3368	3832	3916	3334	2822	2650	3274	3472	2370	1928	5468	4992	5064	5284	4778	6504	4858	4300	4554	5048	5982	4722	152110	3515.33	510.331	4390.22	373.152	3997	737.548	2752.67	571.154	5348.33	614.349	4910.67	583.971
K03605	3116	2758	2362	2948	2746	3308	3548	3620	3990	3076	3420	3360	5478	4188	3332	4160	4268	3022	3430	3262	3524	5114	2924	2272	6438	6066	5924	6246	5668	7900	5244	4702	4782	5372	5500	4878	151946	2745.33	377.16	3335.11	375.494	4074.67	858.663	3421	945.455	6373.67	793.09	5079.67	334.978
K20534	4032	2746	2938	4534	4034	5074	5418	5842	5372	5416	5838	5286	5432	4222	3072	4456	4060	4040	2490	2350	2930	3110	2488	2012	5602	5224	5560	4858	4634	6308	3786	3434	3364	3998	4162	3784	151906	3238.67	693.721	5201.56	588.359	4213.67	761.618	2563.33	398.452	5364.33	599.121	3754.67	310.619
K01749	3524	3182	2874	3686	3520	4190	4088	4690	3854	4146	4276	4064	4680	3470	3062	4002	3750	3564	3556	3056	3808	4468	2934	2636	5254	4846	5074	5210	5538	6618	5270	4484	4538	5182	5908	4708	151710	3193.33	325.148	4057.11	343.236	3754.67	550.384	3409.67	670.828	5423.33	627.68	5015	546.645
K00765	3490	3080	2940	3822	3442	4024	3976	4500	4032	4108	4172	3882	4918	4030	3114	4140	3938	3654	3110	2796	3388	3986	3002	2504	5018	4912	5162	5456	5180	6664	5362	4638	4980	5310	5858	5030	151618	3170	285.832	3995.33	285.088	3965.67	594.089	3131	513.714	5398.67	646.519	5196.33	415.782
K00806	4166	3116	3116	3932	3680	4452	4372	5008	4014	4378	4838	4572	5330	4280	3516	4304	4594	3702	3130	2764	3244	3734	3088	2406	5024	4518	4892	5636	5278	6394	4310	3938	3958	4556	5194	4182	151616	3466	606.218	4360.67	428.305	4287.67	651.014	3061	449.253	5290.33	657.848	4356.33	470.694
K02906	4244	3338	3258	3896	3466	4084	4086	4496	3802	4112	4516	4238	5132	3820	3466	4370	4380	3678	3352	2828	3284	4248	3488	2884	4514	4194	4666	5026	5046	5986	4862	4394	4422	4928	6268	4808	151580	3613.33	547.636	4077.33	331.146	4141	610.685	3347.33	513.694	4905.33	619.452	4947	686.059
K01295	3054	2426	2558	3840	3182	3952	4304	4532	4286	4082	4364	3976	5482	4040	3244	3350	3090	2744	3732	3056	4052	4920	2950	2672	6628	6370	6340	5524	6168	7462	4286	4094	3832	4330	4522	4136	151580	2679.33	331.115	4057.56	397.531	3658.33	989.665	3563.67	840.931	6415.33	633.106	4200	236.108
K00554	3666	3192	3022	3792	3192	4100	3854	4522	3912	4110	4322	3992	4790	3688	3152	3960	4212	3382	3650	2858	3646	3970	2962	2194	5368	5128	5412	5896	5560	7628	4764	4434	4508	4910	5478	4286	151512	3293.33	333.744	3977.33	373.981	3864	592.965	3213.33	660.135	5832	915.534	4730	430.603
K21572	4894	3736	4310	1102	1448	2630	2054	2242	3206	1544	1298	2580	6460	4006	4144	8616	14412	6078	1814	1684	1560	3754	1504	1088	6540	6080	6106	11886	9124	10388	2744	2566	2618	2316	2506	2410	151448	4313.33	579.007	2011.56	712.378	7286	3881.26	1900.67	940.545	8354	2478.72	2526.67	152.014
K03427	2322	2636	2066	2190	1988	2428	2400	2888	2828	2224	2440	2592	5722	4252	4294	5366	7214	3742	2136	1944	2226	2410	1724	1522	6124	5640	5698	5552	6774	6710	6890	5978	6746	7642	9320	6760	151388	2341.33	285.491	2442	293.581	5098.33	1275.89	1993.67	330.22	6083	547.49	7222.67	1155.49
K00426	2148	2028	1690	3982	3644	4240	4242	4542	4714	4160	4478	4498	4540	3472	2902	3556	3352	3090	3194	2712	3238	3268	2518	1788	6206	5536	5774	6906	5728	8084	4992	4586	4710	5474	6754	4604	151350	1955.33	237.49	4277.78	326.808	3485.33	571.286	2786.33	579.033	6372.33	971.071	5186.67	837.198
K03111	3706	3104	2838	3192	2836	3546	3392	3822	3608	3460	3836	3784	5166	3914	3372	4716	5598	3468	2996	2616	3014	3766	2322	2214	4940	4658	4922	5460	5006	6466	5892	5556	5338	6106	7180	5430	151240	3216	444.707	3497.33	327.867	4372.33	925.076	2821.33	569.276	5242	653.614	5917	683.264
K21471	1542	1708	1216	2354	2112	2416	2426	2814	2474	2558	2530	2798	3162	2166	1918	2624	2178	2536	2856	2540	4022	4556	2010	1462	5120	5436	5552	4448	5710	6370	10124	9154	8990	10678	11714	8964	151238	1488.67	250.298	2498	216.995	2430.67	442.727	2907.67	1182.57	5439.33	638.251	9937.33	1113.41
K08869	3012	2750	2200	3258	2926	3696	3468	4230	3102	3426	3510	3662	4494	3398	2864	3102	3074	2728	3508	2860	3586	4996	2986	2578	5372	5168	5596	4240	5606	5578	6640	6166	6208	6894	8246	5862	150990	2654	414.425	3475.33	378.34	3276.67	638.676	3419	863.712	5260	528.232	6669.33	855.006
K01115	1246	1112	1072	4608	4164	4980	5054	5704	4514	5650	5746	4898	4116	3748	2976	3810	3626	3398	4052	3272	4010	3966	3850	3020	6230	5670	6184	5782	5870	7466	3788	3368	3460	3546	3564	3408	150928	1143.33	91.1336	5035.33	566.334	3612.33	390.437	3695	437.88	6200.33	658.549	3522.33	150.766
K03667	4900	3696	3790	4352	3696	4340	4426	5242	3980	4638	4774	4334	5118	3738	3490	3820	4010	3596	3484	2802	3160	3464	4010	3662	4602	4158	4486	5768	5160	6502	4174	3846	3862	3926	4076	3826	150908	4128.67	669.646	4420.22	445.078	3962	594.259	3430.33	415.109	5112.67	886.209	3951.67	141.808
K00529	3270	2702	2428	4376	4076	5058	4874	5466	4942	4898	5108	4982	5728	3966	3094	4028	3486	3872	2666	2334	3232	3748	2332	2132	3860	3886	4124	3372	4080	4782	5334	4904	5278	6198	7040	5170	150826	2800	429.469	4864.44	409.256	4029	903.802	2740.67	626.828	4017.33	460.104	5654	807.151
K00528	3722	3044	3182	4404	3956	4958	4674	5002	4736	4998	5450	5106	5782	4348	3558	4310	4304	3886	2600	2052	2494	2838	2496	2478	5170	4690	4872	5820	4844	6962	3752	3540	3628	4222	4968	3870	150716	3316	358.313	4809.33	434.374	4364.67	761.001	2493	255.025	5393	867.28	3996.67	531.908
K07091	4730	3582	3996	4242	3496	4324	4242	4954	4160	4526	4890	4454	4692	3460	3192	3936	4920	3144	3200	2736	2996	3220	2998	2370	5534	5124	5572	6326	5534	7270	3746	3612	3742	3740	4240	3748	150648	4102.67	581.386	4365.33	430.916	3890.67	766.138	2920	321.439	5893.33	779.202	3804.67	219.726
K12256	4906	3606	3268	3846	3564	4210	4250	4616	3950	4256	4014	4166	5866	4350	3400	3960	3470	3316	2942	2412	3538	3908	3608	3234	4034	4092	4414	3386	4460	4600	5540	5198	5246	5714	6074	5142	150556	3926.67	864.801	4096.89	298.155	4060.33	968.811	3273.67	536.298	4164.33	439.904	5485.67	363.187
K01356	3718	2736	3092	3918	3346	4120	4096	4690	3846	3948	4442	4110	4448	3560	3160	3580	3706	3374	3112	2770	3076	3668	2990	2476	5714	5372	5556	5496	5282	7140	5406	4716	4596	5110	5370	4794	150534	3182	497.148	4057.33	377.236	3638	440.08	3015.33	397.671	5760	692.366	4998.67	346.449
K07290	2050	1828	1764	4770	4030	4958	5238	5878	4642	4734	5138	4668	2294	1914	1486	1156	1084	1566	5122	3878	4412	3278	4098	3190	8862	8794	8938	6932	7670	9180	2898	2910	2898	2578	2608	2934	150378	1880.67	150.098	4895.11	506.491	1583.33	459.589	3996.33	725.316	8396	889.309	2804.33	164.499
K02982	4404	3178	3702	3564	3438	3890	3818	4308	3564	4060	3846	4028	5810	4112	3542	4460	4514	3662	3110	2598	2968	3760	3280	3086	4370	3958	3984	4530	4562	5674	5374	4894	4998	5832	6364	5024	150266	3761.33	615.15	3835.11	278.282	4350	818.956	3133.67	382.341	4513	625.927	5414.33	578.685
K02622	4850	3682	3930	3926	3308	3812	3824	4528	3530	3652	3732	3616	5696	4124	3856	4988	5466	3698	3252	2570	2910	4244	3852	3412	4918	4508	4880	4764	5208	5594	4470	3828	4276	4320	4824	4184	150232	4154	615.376	3769.78	337.955	4638	858.693	3373.33	610.479	4978.67	377.426	4317	328.316
K23775	2216	1820	1814	4298	3766	4944	4692	5132	4744	4610	4922	4972	5144	3874	3088	4046	3946	3564	2642	2098	2654	3096	2628	2234	5256	4806	4988	5602	5040	7058	5234	4490	4564	5328	6298	4564	150172	1950	230.382	4675.56	419.54	3943.67	683	2558.67	354.172	5458.33	829.731	5079.67	699.908
K01486	3642	2562	2920	3804	3380	4454	4494	4624	4788	4486	4802	4332	5546	4472	3576	4558	4978	3844	3672	3204	3642	2858	2718	2444	5594	4868	4806	6950	4976	7974	3470	3332	3270	3722	3812	3550	150124	3041.33	550.128	4351.56	469.12	4495.67	722.599	3089.67	503.179	5861.33	1311.81	3526	213.118
K22227	3162	2730	2590	3902	3410	4584	4942	5304	5080	4922	5566	4868	4922	4490	3228	3952	4006	4168	3234	2662	3158	2606	2138	1614	4894	4394	4438	6982	4704	7494	4424	4118	3840	4622	4724	4162	150034	2827.33	298.163	4730.89	680.167	4127.67	569.024	2568.67	615.946	5484.33	1380.06	4315	335.039
K13599	4696	3242	3702	4014	3474	4110	4258	5174	4002	4752	5278	4634	5138	3980	3456	4476	4798	3800	3370	2784	3052	3548	3718	2948	5172	4352	4962	7340	5736	7688	3204	3014	3066	3070	2946	3054	150008	3880	743.164	4410.67	593.373	4274.67	639.079	3236.67	365.712	5875	1349.06	3059	84.8693
K01480	3534	2800	2788	3876	3244	3560	3620	4354	3576	3420	3940	3572	4084	3140	2718	3136	3118	2560	5016	4114	5040	6516	4446	3978	5584	5436	5442	5636	5808	6874	4012	3932	3818	4484	4754	4016	149946	3040.67	427.281	3684.67	327.542	3126	530.084	4851.67	927.846	5796.67	545.47	4169.33	365.753
K01453	2260	1878	1792	5092	4220	5228	5446	5898	5602	5156	5736	5456	4238	3322	2304	2682	2294	2484	3022	2768	3298	3656	2902	2838	5976	5364	5802	4928	4914	6334	4534	4338	4280	4654	4974	4246	149916	1976.67	249.113	5314.89	489.661	2887.33	762.941	3080.67	337.714	5553	580.613	4504.33	278.781
K03741	3126	2308	2404	3862	3070	3928	3902	4632	3708	4118	4304	4318	4750	3650	2976	3760	3652	3056	2676	2456	3182	3956	2712	2232	4844	4594	4916	4652	5118	6852	6112	5416	5438	6580	7044	5432	149736	2612.67	447.144	3982.44	445.549	3640.67	636.976	2869	619.318	5162.67	848.811	6003.67	695.46
K00925	2338	2128	1932	3330	2860	3622	3648	4202	4016	3678	3908	4060	4964	3778	3094	4048	4384	3744	3106	2754	3318	3886	2462	1918	6106	5698	6094	6538	5758	8088	5120	4708	4558	5330	5848	4694	149718	2132.67	203.04	3702.67	414.794	4002	634.774	2907.33	687.971	6380.33	888.944	5043	491.034
K00640	4156	3076	3112	3942	3450	4210	4350	5280	4184	4378	4816	4600	5092	3746	3380	4600	4434	3822	2964	2438	2766	3428	2496	1930	4558	4304	4450	5034	4520	6064	4952	4518	4600	5046	5934	4522	149152	3448	613.41	4356.67	520.644	4179	637.052	2670.33	510.277	4821.67	656.523	4928.67	541.674
K02897	4158	3166	3520	3916	3314	3894	4166	4672	3898	4368	4518	4296	4872	3742	3316	3722	4016	3280	3232	2794	3108	3972	2998	2352	5248	4706	5312	5586	5326	6660	4660	4270	4284	4546	5074	4122	149084	3614.67	502.73	4115.78	410.663	3824.67	584.173	3076	536.276	5473	649.335	4492.67	346.211
K12511	3636	2698	2786	4186	3560	4474	4694	5286	4142	4580	4848	4700	5252	3634	3040	3836	3194	3376	2710	2422	3176	3914	2664	2172	3662	3498	3800	3712	4168	5230	6058	5520	5218	6524	6896	5306	148572	3040	518.023	4496.67	491.665	3722	803.152	2843	622.116	4011.67	637.103	5920.33	687.93
K03650	4318	3232	3376	3562	3110	3668	3836	4628	3908	3970	4356	4006	4996	3782	3218	3944	4740	2996	3424	2958	3274	3864	3086	2318	5488	5052	4924	6628	5386	7626	4158	3842	3786	4170	4778	4106	148514	3642	589.844	3893.78	440.175	3946	799.039	3154	516.398	5850.67	1058.31	4140	353.141
K05565	1932	1962	1586	2788	2268	2968	2664	2812	3000	2850	2854	3024	6498	4536	4206	5004	5048	3658	4028	3590	4266	5234	3162	2200	6476	6254	6592	5768	6980	7820	4350	4018	4012	4794	5008	4262	148472	1826.67	208.963	2803.11	230.634	4825	970.492	3746.67	1031.46	6648.33	699.452	4407.33	410.509
K22522	4642	3354	3588	3874	3244	3922	4222	4900	3894	4148	4482	4242	5742	3818	3430	3866	3930	3308	2970	2600	3066	3580	2722	2250	4848	4488	4638	4700	4814	6180	4748	4566	4510	5014	5504	4650	148454	3861.33	686.126	4103.11	458.41	4015.67	882.364	2864.67	454.213	4944.67	618.857	4832	373.986
K06173	3908	3058	2888	3504	3074	3854	3804	4168	3698	3896	4282	3934	4858	3776	3008	4160	4674	3516	2906	2498	3248	3862	2500	2216	5022	4498	4978	5694	5544	6720	5034	4688	4676	5220	5750	4752	147866	3284.67	546.474	3801.56	357.583	3998.67	704.915	2871.67	605.182	5409.33	772.479	5020	417.967
K01266	4988	3434	3756	3954	3352	3670	4192	4472	3864	4206	4312	4132	6362	4590	3534	4514	3874	3754	2140	2008	2580	2728	2530	1880	4286	3896	4100	4768	4700	5814	5396	4946	4676	5560	5896	4792	147656	4059.33	820.206	4017.11	347.065	4438	1032.84	2311	346.705	4594	686.442	5211	481.095
K00697	3078	2442	2474	4508	3746	4524	4850	5306	4154	4668	4852	4592	5500	3976	2948	3636	2836	3398	2738	2520	3446	3912	2902	2268	4404	4360	4582	3488	4034	5084	5396	4904	5118	5772	6230	4840	147486	2664.67	358.315	4577.78	442.6	3715.67	971.803	2964.33	611.146	4325.33	535.695	5376.67	540.957
K01783	4200	2844	3136	3724	3332	4002	3938	4712	3892	4500	4614	4188	4608	3508	3154	3698	3902	3388	2886	2606	3074	3744	2760	2238	5200	4836	5152	5758	5194	6874	4574	4266	4198	4982	5522	4268	147472	3393.33	713.687	4100.22	449.555	3709.67	509.32	2884.67	507.085	5502.33	734.853	4635	523.969
K04033	2348	1912	1868	2552	2094	2520	2924	3338	2802	2726	2950	3184	4536	2904	2412	2518	2148	1544	3514	3172	3888	4150	2836	2210	9362	9054	9450	5756	6938	7672	5276	4912	5182	5682	5732	5214	147280	2042.67	265.34	2787.78	373.706	2677	1016.51	3295	711.853	8038.67	1505.35	5333	315.738
K01695	3378	2636	2676	3646	3062	3518	3512	4214	3678	3902	4060	3818	4626	3392	2906	3452	3506	3048	2984	2502	2846	3630	2682	2310	6040	5390	5514	7478	5870	9630	4406	4082	4042	4686	5648	4462	147232	2896.67	417.326	3712.22	340.237	3488.33	606.334	2825.67	461.248	6653.67	1638.57	4554.33	588.142
K07076	1142	936	1036	3494	2800	3232	3466	3746	3612	3372	3628	3212	3356	2880	2682	3048	3226	2540	2690	2428	2488	2804	2538	1800	9306	8426	8504	10762	8580	12002	4006	3614	3512	4144	4336	3860	147208	1038	103.015	3395.78	285.926	2955.33	314.728	2458	350.629	9596.67	1471.47	3912	314.307
K02437	3648	2724	2968	3628	3262	3946	4316	4498	4508	4406	4978	4322	4486	3548	2824	3002	3572	3096	2910	2616	3090	2954	2416	1686	6144	5352	5682	8050	5594	8846	4098	3734	3792	4040	4424	3970	147130	3113.33	478.837	4207.11	516.093	3421.33	601.789	2612	515.783	6611.33	1467.41	4009.67	247.119
K02601	4384	3386	3490	3732	3394	3836	3738	4458	3718	4218	3992	4300	5276	3784	3468	4040	3660	3624	2954	2612	3108	3636	2910	2458	4524	4088	4328	4924	4716	5986	5108	4502	4574	5352	6010	4602	146890	3753.33	548.643	3931.78	339.04	3975.33	665.249	2946.33	413.135	4761	667.204	5024.67	589.899
K03687	3602	2688	2704	3630	3090	3862	3922	4292	4070	3902	4356	4050	4892	3736	3176	3682	3862	3028	3082	2560	3318	3706	2778	2214	5458	5044	5360	5932	5134	7428	4652	4244	4334	4786	5624	4614	146812	2998	523.141	3908.22	378.042	3729.33	658.745	2943	538.046	5726	890.012	4709	492.398
K05970	2976	4088	2486	3794	3082	4000	4108	5386	4148	3970	4262	4290	5292	3704	2972	3136	3586	2670	3488	3232	4248	3060	3484	2652	5568	5674	5492	6760	6970	8158	3466	3232	3368	3304	3318	3330	146754	3183.33	820.878	4115.56	599.29	3560	931.542	3360.67	534.406	6437	1056.47	3336.33	77.6187
K11529	3498	2806	3294	4094	3528	4352	4778	4908	4376	4680	4860	4398	5536	4198	3590	3840	3736	3590	3490	2700	3136	3322	2830	2264	5202	5004	4838	6006	4580	6716	3740	3640	3630	3686	3926	3776	146548	3199.33	355.58	4441.56	437.651	4081.67	746.991	2957	449.84	5391	810.293	3733	110.104
K02169	3192	2824	2544	3976	3852	4538	4484	4960	4432	4698	5044	4658	4552	3504	2738	3274	2990	2942	2884	2536	3464	3704	2818	2174	5192	5228	5476	4564	5138	5946	4710	4006	4360	4700	5870	4394	146366	2853.33	324.994	4515.78	398.476	3333.33	654.712	2930	570.204	5257.33	452.141	4673.33	641.187
K03437	4112	2912	3100	3528	2878	3790	3636	3928	3996	3536	3846	3682	5460	4004	3466	4160	4406	3294	2632	2496	2888	3812	1920	1586	5226	4520	5204	5002	4920	6790	5262	4862	4776	5404	6318	4968	146320	3374.67	645.431	3646.67	331.662	4131.67	774.807	2555.67	780.068	5277	783.993	5265	568.837
K13049	3840	2944	3074	4134	3782	4478	4708	5212	4270	4696	5296	4964	5060	3724	2940	3446	3270	3424	2336	1898	2972	3340	2362	1926	4588	4550	4738	4568	4988	6032	5106	4340	4526	4988	5296	4380	146196	3286	484.161	4615.56	502.521	3644	739.534	2472.33	576.474	4910.67	573.55	4772.67	408.311
K01778	3856	2924	2980	3532	3046	3626	3776	4160	3614	4046	4242	3796	4630	3360	2796	3552	3910	3198	3398	2630	3560	4060	2842	2252	4918	5156	5116	5522	5320	6470	5106	4532	4592	5086	5528	4536	145668	3253.33	522.675	3759.78	366.866	3574.33	635.763	3123.67	667.115	5417	554.431	4896.67	408.444
K04654	3470	3032	2562	3034	2652	3430	3556	3948	3856	3508	3886	3660	4772	3846	3124	3924	4392	3506	3656	3012	3572	4136	2886	2478	5634	5680	5592	6006	5576	7050	4566	4026	4282	4470	4560	4010	145350	3021.33	454.094	3503.33	425.191	3927.33	593.105	3290	604.821	5923	574.379	4319	254.79
K07037	4392	3268	3744	3010	2968	3862	4124	3806	4644	3522	4248	3732	4974	4714	3728	4652	5122	3722	3922	3352	3558	2924	2470	1940	5000	4418	4536	7326	4702	8060	3350	3322	3288	3558	3798	3504	145260	3801.33	564.189	3768.44	548.995	4485.33	613.26	3027.67	733.626	5673.67	1593.34	3470	192.827
K02044	3050	2596	2644	4582	4254	5038	5048	5210	4944	4988	5268	4970	5806	4138	3738	3596	3302	3194	3308	2832	3180	3804	3348	2946	5226	4850	5032	4902	4350	6014	3098	2974	2836	3306	3494	3210	145076	2763.33	249.418	4922.44	316.417	3962.33	963.418	3236.33	343.745	5062.33	549.834	3153	236.006
K00652	3230	2370	2658	4242	3494	4202	4082	4862	3982	4206	4702	4304	4966	4134	3422	4064	3812	3254	3060	2518	3086	3746	2542	2074	4578	4174	4394	5478	4770	6220	4696	4392	4342	4592	5514	4818	144980	2752.67	437.746	4230.67	395.962	3942	610.077	2837.67	584.63	4935.67	771.044	4725.67	425.975
K00019	3408	2668	2666	4556	3936	4574	4620	5430	4010	4616	4614	4266	5950	4272	3400	3908	3830	3184	2816	2590	3092	3938	3494	3056	4760	4412	4684	4264	5352	6142	3898	3526	3610	3960	4082	3394	144978	2914	427.818	4513.56	436.701	4090.67	988.977	3164.33	484.851	4935.67	699.733	3745	272.98
K00930	3808	2956	2918	3842	3292	3870	3828	4534	3784	4008	4032	4028	5050	3888	3452	3612	3610	3506	3042	2750	3466	4110	2860	2422	4802	4556	4620	4306	4522	5304	5182	4480	4684	5156	5910	4648	144838	3227.33	503.231	3913.11	323.738	3853	605.372	3108.33	599.464	4685	342.907	5010	525.189
K01424	4398	3328	3406	2978	2688	3144	3388	3768	3238	3340	3468	3370	5920	4418	3688	4618	4778	3412	3054	2616	3052	3680	2614	2090	4812	4514	4536	5048	5368	6540	5016	4394	4550	5028	5792	4604	144656	3710.67	596.524	3264.67	307.543	4472.33	889.137	2851	540.253	5136.33	759.558	4897.33	508.255
K01918	3554	2868	2796	3640	2992	3902	3854	4400	4122	3932	4248	3862	4784	3276	2870	3638	3948	3294	2738	2472	3006	3844	2506	2010	5184	4908	4930	5640	5126	6722	5042	4622	4332	5102	5806	4490	144460	3072.67	418.399	3883.56	405.371	3635	670.607	2762.67	623.855	5418.33	691.081	4899	538.48
K00945	3412	2394	2604	3176	2722	3594	3908	4284	3730	3878	4204	3940	4578	3426	2940	3462	3932	2964	3146	2718	3200	3430	2788	2374	5922	5624	5640	6398	5538	7918	4420	4004	4206	4332	5372	4094	144272	2803.33	537.477	3715.11	496.08	3550.33	623.109	2942.67	385.445	6173.33	910.754	4404.67	497.547
K19689	3016	2514	2674	3968	3592	4414	4612	4770	5022	4822	5170	4626	5382	4594	3412	4002	3338	3650	2708	2554	2928	2434	1836	1528	5574	4684	4776	6722	4614	8060	3596	3488	3354	3794	4266	3704	144198	2734.67	256.44	4555.11	501.739	4063	793.15	2331.33	538.277	5738.33	1391.87	3700.33	317.705
K00823	4802	3654	3846	4036	3560	4536	4730	4692	4770	4722	5318	4644	6692	4966	4294	4540	3652	4008	2666	2160	2696	2766	2356	1732	4228	3998	4168	3974	4054	5136	3554	3338	3430	3648	4638	3634	143638	4100.67	614.912	4556.44	496.655	4692	1077.59	2396	399.498	4259.67	440.395	3707	471.565
K01008	3874	2834	2974	3850	3196	3922	4380	4844	4304	4692	4880	4298	5022	3932	3354	3486	3912	3194	3012	2756	3114	3524	2558	2142	5420	5026	5240	6244	5534	7190	3646	3368	3192	3660	3736	3318	143628	3227.33	564.388	4262.89	541.321	3816.67	661.261	2851	478.659	5775.67	806.662	3486.67	222.242
K03407	2872	3124	2560	4748	4534	5394	4884	5380	5398	4426	5374	4992	4662	4092	4548	4620	5254	4612	2426	1952	2094	3230	2838	2126	3696	3616	3462	7566	5340	6664	2862	2772	2626	2834	3248	2790	143616	2852	282.531	5014.44	390.464	4631.33	370.67	2444.33	497.804	5057.33	1756.73	2855.33	209.042
K12373	3040	2502	2554	2388	2320	2798	3026	3048	3092	2830	3126	2930	4518	3062	2486	4480	6014	3220	2292	2176	2814	3308	1588	1416	6250	5840	5872	8424	6748	8766	5520	4794	4768	5310	5512	4738	143570	2698.67	296.745	2839.78	297.453	3963.33	1290.53	2265.67	717.917	6983.33	1295.29	5107	380.75
K19802	3104	2654	2808	3946	3522	4110	4300	4844	4380	4410	4780	4220	4758	3650	2826	3600	3778	3148	3806	2940	3440	3364	3038	2214	5550	5298	5208	6338	5410	7780	3512	3292	3102	3318	3550	3354	143352	2855.33	228.704	4279.11	405.279	3626.67	659.433	3133.67	546.145	5930.67	992.418	3354.67	162.494
K09690	3326	2442	2738	4178	3632	4298	4672	5248	4606	5164	5368	5434	5392	4028	3422	3868	4144	3172	2396	2242	2642	2454	1904	1518	6046	5246	5528	5528	4770	6752	3474	3306	3248	3700	3856	3482	143224	2835.33	449.966	4733.33	619.971	4004.33	774.101	2192.67	412.911	5645	683.879	3511	231.582
K03308	4138	3070	3374	3724	3084	3744	3610	4100	3280	3996	3922	3596	3968	3192	2786	4196	4610	3658	3208	2660	3418	4040	4172	3322	5514	5404	5440	6392	6288	7472	3286	3186	3138	3022	3710	3416	143136	3527.33	550.263	3672.89	329.312	3735	668.403	3470	559.831	6085	808.091	3293	244.124
K03768	3876	2718	2958	4224	3354	4032	4048	4550	3540	4246	4548	4196	4598	3534	3174	3362	3278	3096	2762	2578	2914	3332	3046	3240	4838	4464	4728	4798	4928	5986	4766	4184	4296	4810	5582	4250	142834	3184	611.186	4082	406.762	3507	555.749	2978.67	286.124	4957	528.131	4648	531.061
K00262	3880	3166	3396	3004	2226	3016	3166	3266	3340	3424	3694	3366	3944	3542	2972	4318	6094	3348	3102	2614	2924	3494	3174	2982	5388	5008	4942	8570	6168	8452	3626	3468	3448	3880	4650	3764	142816	3480.67	364.452	3166.89	412.001	4036.33	1111.11	3048.33	291.82	6421.33	1676.8	3806	445.956
K01181	2176	2210	1932	3654	3268	4408	4230	4818	4402	3996	4526	4280	4808	3644	2890	3284	3790	3030	2056	1962	2600	2984	1886	1592	6628	6166	6334	8460	7608	9396	3378	3164	3058	3406	3326	3436	142786	2106	151.644	4175.78	472.049	3574.33	696.018	2180	513.4	7432	1296.14	3294.67	150.586
K06178	4010	3034	2862	3514	3104	3762	3730	4418	3738	4080	4098	4016	5220	3964	3412	3952	4346	3480	2700	2426	2894	3460	2386	1980	5014	4558	4616	5438	5160	6586	4472	4108	4160	4678	5136	4262	142774	3302	619.148	3828.89	381.555	4062.33	664.01	2641	507.232	5228.67	743.253	4469.33	389.16
K02117	3558	2992	2814	2742	2512	3206	2972	2928	3224	3092	3322	3104	4728	3898	2976	4344	4244	3206	2980	2550	3502	3500	2618	2246	5528	5280	5316	5824	5002	6534	5566	5186	5244	5546	5576	4872	142732	3121.33	388.496	3011.33	256.197	3899.33	683.589	2899.33	521.256	5580.67	541.504	5331.67	283.107
K01209	2292	2138	2100	5000	4426	5940	6018	6574	6632	6358	6650	7076	5218	3322	2766	3458	3872	3504	1598	1512	1850	1656	1328	1162	5244	4778	4912	6708	6044	7536	2600	2264	2420	2610	2614	2500	142680	2176.67	101.673	6074.89	856.465	3690	830.124	1517.67	244.352	5870.33	1096.37	2501.33	139.414
K03727	2104	1984	1750	2876	2650	3222	2890	3218	3078	2926	2924	3332	3752	2734	2568	2618	1778	2724	3108	2762	4092	4350	2772	1854	4870	4984	5020	4480	5160	5854	7648	6856	6664	7760	8396	6640	142398	1946	180.033	3012.89	215.884	2695.67	629.691	3156.33	927.57	5061.33	451.73	7327.33	716.473
K03833	3632	2866	3102	3900	3524	4318	4686	4728	4726	4876	5468	4482	5306	4318	3628	3902	3964	3740	3004	2706	3166	2812	2346	2002	5154	4484	4446	6522	4916	7264	2884	2884	2896	3000	3140	3300	142092	3200	392.291	4523.11	565.384	4143	616.595	2672.67	431.321	5464.33	1162.11	3017.33	170.602
K03322	2918	2252	2508	5106	4182	5394	5428	6144	5264	5410	5898	5346	4450	3078	2672	3648	3700	3552	2330	2272	2476	3066	2610	2248	4136	4012	3924	5048	4480	5902	3674	3500	3396	3796	4342	3832	141994	2559.33	335.954	5352.44	544.688	3516.67	604.832	2500.33	309.005	4583.67	765.078	3756.67	332.454
K21405	2054	1984	1742	2408	2052	2994	3218	3164	4128	2590	3376	2736	3444	3572	2948	2868	3848	2578	3432	2894	3002	2344	2202	1664	7712	7010	7152	12142	7192	13800	2806	2788	2842	3240	4574	3370	141870	1926.67	163.711	2962.89	608.562	3209.67	485.361	2589.67	638.695	9168	3001.53	3270	684.415
K08301	4836	3376	3932	3146	3290	3582	3708	4070	3726	3862	4182	3756	4754	3680	3328	3942	5252	3298	3300	2634	2766	3272	3174	2648	4736	4378	4382	6166	5566	6942	3856	3592	3500	3654	3884	3648	141818	4048	736.88	3702.44	333.21	4042.33	796.921	2965.67	316.166	5361.67	1049.28	3689	150.964
K06969	3318	3122	2516	3400	2938	4066	4002	4300	4294	3840	4378	3896	6470	4918	3970	5062	5766	4030	2038	2032	2640	2562	1800	1384	5060	5046	5102	5030	4498	6116	4322	3890	3836	4084	4222	3826	141774	2985.33	418.102	3901.56	469.137	5036	974.91	2076	471.744	5142	527.92	4030	211.611
K01560	3798	2938	2882	5160	4506	4950	5204	5712	4138	5424	5764	5364	4738	3476	2856	3072	2580	2768	2950	2380	2996	3624	3088	2778	4462	4096	4404	3558	4136	5246	3808	3466	3566	3884	4446	3426	141644	3206	513.451	5135.78	535.466	3248.33	791.625	2969.33	406.861	4317	556.654	3766	380.444
K00965	2188	1980	1824	3388	2866	3796	3468	3888	3976	3608	4258	4004	4686	3542	2796	3536	3210	2878	3040	2646	3360	3406	2338	1862	6382	6168	6396	5994	5804	7864	4414	3998	3966	4770	4846	4270	141416	1997.33	182.618	3694.67	415.248	3441.33	686.383	2775.33	608.57	6434.67	736.247	4377.33	374.109
K09903	3590	2870	2756	3744	3386	3770	3980	4276	3738	4126	4378	4046	5008	3834	3276	4328	4140	3446	2866	2386	3018	3688	2600	2368	4508	4232	4258	4768	4714	6256	4612	4272	4210	4598	5210	4148	141404	3072	452.208	3938.22	309.673	4005.33	632.728	2821	497.151	4789.33	752.24	4508.33	396.439
K21469	3688	2606	2770	3416	2900	3476	3834	4154	3864	3966	4602	3984	4422	3472	3032	3620	3734	2910	3010	2724	3066	2928	2298	1556	6130	5492	5570	7832	6784	9056	3458	3206	3134	3704	3582	3272	141252	3021.33	583.144	3799.56	487.034	3531.67	544.267	2597	581.258	6810.67	1401.91	3392.67	225.103
K01087	2486	2332	1902	4022	3546	3780	4106	4718	3860	4210	4356	3962	4836	3948	3376	3264	2832	2820	3126	3000	3556	4590	2682	2432	5274	5178	5282	4696	5386	6406	4168	3844	3790	4402	5070	3994	141232	2240	302.675	4062.22	342.563	3512.67	769.978	3231	768.986	5370.33	562.432	4211.33	476.493
K10805	1934	1864	1402	4592	3664	4586	4318	5024	3956	4436	4304	4442	4410	3078	2894	3370	2414	2986	2828	2738	3430	4402	2470	1966	4992	4826	5214	4050	5802	5614	4934	4380	4486	5102	5800	4514	141222	1733.33	289.07	4369.11	388.922	3192	673.012	2972.33	847.844	5083	625.7	4869.33	536.117
K03570	4298	3200	3128	3584	3084	3572	3770	4006	3628	3826	4142	3676	4712	3436	2722	4010	4392	3120	2946	2482	2998	3682	2592	2108	5156	4924	4930	5610	4860	6422	4548	4102	3944	4342	5050	4154	141156	3542	655.704	3698.67	301.002	3732	768.836	2801.33	540.682	5317	607.596	4356.67	398.436
K05714	2412	1906	2026	4684	4122	4882	5122	5628	4816	4882	5264	4936	4710	3494	2644	3178	2988	3004	2554	2486	2894	3926	2108	1928	4978	4798	4782	4110	4590	5608	4300	3790	4076	4358	5070	4080	141134	2114.67	264.396	4926.22	413.297	3336.33	727.736	2649.33	712.583	4811	490.785	4279	436.416
K04761	3488	2554	2986	4018	3640	4138	3830	4794	3488	3800	3786	4192	5186	3692	3108	3882	3688	3216	2826	2486	3154	4004	3402	2624	4850	4758	5152	3876	5278	5502	4362	3876	3960	4356	5026	3900	140878	3009.33	467.437	3965.11	384.407	3795.33	744.542	3082.67	563.592	4902.67	572.711	4246.67	440.991
K15269	3964	2592	3126	3814	3436	4118	4264	4762	4436	4298	4536	4516	6040	4202	3382	3864	3814	3126	2396	2136	2626	3090	2216	1624	4196	4078	4406	4320	4314	5208	4298	4116	4036	4760	6218	4348	140676	3227.33	691.59	4242.22	406.412	4071.33	1036.41	2348	493.294	4420.33	402.372	4629.33	817.976
K00185	6006	3830	4510	4390	3804	4674	5114	5530	5112	6266	6840	5590	4156	3890	2948	3514	3472	3704	2670	2188	2380	1756	2666	2286	4320	3846	3848	5634	4062	5968	2586	2376	2560	2646	2428	2630	140200	4782	1113.21	5257.78	932.312	3614	412.737	2324.33	341.286	4613	942.489	2537.67	110.688
K21417	4352	3142	3176	4456	3854	4604	4860	5392	4780	5748	5824	5148	5568	4378	3410	3042	2546	3140	2634	2362	2994	2910	2120	2080	3792	3738	3818	3848	3856	4964	3970	3634	3788	3982	4404	3842	140156	3556.67	688.989	4962.89	635.976	3680.67	1105.37	2516.67	391.987	4002.67	472.89	3936.67	262.388
K09761	3320	2962	2724	3286	2856	3380	3666	4090	3604	3582	3780	3350	4142	3232	2862	3256	3920	2844	3060	2458	3094	4230	2602	2188	5366	4946	5176	5378	5216	6822	4790	4400	4378	4890	5928	4226	140004	3002	300.007	3510.44	347.859	3376	541.304	2938.67	723.087	5484	674.023	4768.67	623.258
K25232	3924	2958	3132	3082	2738	3558	3798	3516	4080	3508	4112	3426	5750	5020	3480	5570	5238	4330	2914	2816	3530	2392	1416	1112	4656	4086	4158	4776	3722	6804	4180	3872	4056	4650	5184	4388	139932	3338	514.894	3535.33	440.602	4898	853.384	2363.33	930.951	4700.33	1101.07	4388.33	473.709
K11206	3936	2894	2736	3814	3314	3724	3966	4548	3614	3944	3904	4038	5136	3516	3058	3894	3618	3190	3222	2588	3264	3804	3508	2968	4688	4116	4566	4170	4448	5580	4266	3892	4112	4488	5144	4164	139832	3188.67	652.013	3874	335.92	3735.33	749.011	3225.67	421.586	4594.67	531.298	4344.33	437.572
K01609	3282	2602	2592	3614	3166	3730	3706	4370	3810	3980	4242	3998	4594	3362	3106	3482	3562	3028	2840	2456	3254	3652	2546	2204	5212	4720	5016	4642	4838	6220	4454	4184	4302	4786	5236	4390	139178	2825.33	395.517	3846.22	357.601	3522.33	564.814	2825.33	541.819	5108	582.482	4558.67	388.875
K11936	3326	2474	2750	3540	3284	3824	3830	4412	3914	4074	4376	4506	4592	3168	2714	3958	5406	3290	2424	1996	2478	3132	1962	1708	4442	4174	4094	5850	4728	6546	4338	4028	4322	4454	6430	4610	139154	2850	434.714	3973.33	411.971	3854.67	1005.23	2283.33	508.87	4972.33	999.648	4697	870.284
K11070	4256	3156	3144	4296	3762	4176	3752	4374	3890	3858	4198	4004	5866	4228	3618	3526	2996	3126	2470	2112	2524	3058	3402	3026	3784	3420	3546	3502	3576	4848	4728	4606	4638	5312	5738	4610	139126	3518.67	638.578	4034.44	233.833	3893.33	1059.07	2765.33	475.658	3779.33	537.381	4938.67	475.769
K03405	2422	2090	2144	4154	3540	4220	4290	4654	4186	4386	4774	4402	4784	3676	2888	3874	3526	3356	3152	2946	3392	4160	3108	2822	3856	3592	3760	3676	4564	5114	4856	4174	4230	4938	5200	4176	139082	2218.67	178.15	4289.56	350.931	3684	634.402	3263.33	480.118	4093.67	609.299	4595.67	455.592
K06204	4450	3184	3406	3706	3162	3742	3714	4254	3554	3560	3990	3576	4668	3516	3246	3712	3648	3144	2968	2558	3368	3230	2744	2336	4936	4372	4580	4552	4500	6202	4562	4030	3982	4384	5092	4198	138826	3680	676.015	3695.33	303.84	3655.67	543.542	2867.33	396.369	4857	685.229	4374.67	413.265
K07456	3946	3266	3272	3232	2806	3704	3972	3948	3946	4330	4568	4068	4992	4480	3350	4986	6244	4198	3058	2534	2856	2702	2216	1608	4822	4184	3964	6710	4646	7270	3082	2774	2932	3020	3800	3326	138812	3494.67	390.878	3841.56	538.48	4708.33	966.797	2495.67	520.82	5266	1381.93	3155.67	364.337
K07130	3646	2360	2912	4736	4194	5096	5212	5716	5326	5366	5632	5166	6012	4598	3262	4078	4030	3646	2514	2320	2874	2642	1960	1912	3700	3616	3496	3684	2978	4448	3628	3418	3310	3784	3794	3744	138810	2972.67	645.143	5160.44	463.907	4271	963.54	2370.33	381.864	3653.67	472.617	3613	204.559
K06997	3658	2684	2990	3396	2962	3838	3592	4056	3828	3822	4286	3846	4570	3430	2978	3510	3902	3034	2936	2472	3106	3716	2514	1988	4962	4670	4668	5070	4882	6476	4758	4192	4072	4574	5134	4226	138798	3110.67	498.086	3736.22	383.842	3570.67	595.178	2788.67	599.857	5121.33	682.589	4492.67	406.644
K03316	2962	2320	2648	4490	4178	4538	4810	5494	5176	4964	5422	4936	4450	3374	2570	3278	2844	3410	3164	2664	2916	3914	2962	2908	4596	4194	4402	5144	4564	5904	3322	2958	3070	3284	3544	3228	138602	2643.33	321.025	4889.78	437.961	3321	644.787	3088	434.9	4800.67	626.115	3234.33	204.671
K07154	2850	2354	2480	3158	2606	3386	3366	3806	3526	3572	3792	3668	4892	3654	3620	4132	4678	3414	2114	1876	2316	2484	1586	1220	5008	4624	4410	6176	4862	6936	4898	4770	4852	5608	6614	5262	138570	2561.33	257.809	3431.11	373.735	4065	609.087	1932.67	472.245	5336	996.221	5334	701.31
K01495	4318	3034	3366	4114	3836	4116	4556	4886	4040	4470	4848	4440	5480	3962	3064	4152	4450	3738	2434	1930	2374	3062	2436	2074	3624	3380	3506	3858	3690	4846	4346	4020	3966	4404	5014	4200	138034	3572.67	666.481	4367.33	365.424	4141	805.345	2385	391.714	3817.33	529.451	4325	379.192
K18929	2618	2336	2056	3982	3582	4310	4364	4698	5088	4190	4450	4194	4352	3516	2774	2982	2944	2890	3016	2706	3128	2678	2476	2098	5512	5310	5458	5020	5162	6430	4194	3792	3676	4108	4152	3772	138014	2336.67	281.001	4317.56	424.743	3243	601.083	2683.67	372.703	5482	499.121	3949	226.725
K03621	3894	2942	2806	4058	3754	4066	4174	4638	4004	4524	4570	4186	5006	3690	3168	3690	3936	3262	2678	2310	2876	3644	2878	2420	4868	4594	4842	5488	4660	6130	3546	3220	3368	3206	3432	3424	137952	3214	592.81	4219.33	297.212	3792	661.153	2801	474.041	5097	596.894	3366	131.939
K18688	1842	1982	1366	5226	4294	5064	4928	5340	4262	4952	4616	4866	4238	3018	2604	2958	1982	2816	2368	2522	3416	4202	2342	1776	4952	5026	5584	3732	6146	5412	4090	3828	3814	4050	4468	3858	137940	1730	322.912	4838.67	379.555	2936	739.885	2771	878.893	5142	814.117	4018	249.81
K18189	4002	2820	3100	3630	3260	3944	3792	4220	3798	3912	4288	4046	5050	3760	3224	3860	3934	3050	2582	2240	2758	3554	2628	2340	4286	3936	3986	5012	4720	5888	4334	4008	4268	4410	5082	4204	137926	3307.33	617.674	3876.67	311.45	3813	704.119	2683.67	467.202	4638	741.743	4384.33	368.133
K02020	3140	2578	2416	4444	3862	4564	4654	5224	4274	5200	5290	4888	4834	3786	3038	3650	3060	3356	2704	2210	2646	2910	2568	1916	4220	4078	4254	3852	4510	5364	3904	3796	3600	4194	4864	4028	137876	2711.33	379.97	4711.11	484.352	3620.67	666.974	2492.33	363.444	4379.67	528.511	4064.33	440.662
K11105	2496	2078	2016	3142	2788	3376	3122	3252	2830	2980	2998	3154	4134	2948	2684	3868	3910	3038	2924	2540	3524	4498	2500	1992	4716	4626	4608	4636	5034	5608	6202	5446	5536	5884	7096	5520	137704	2196.67	261.077	3071.33	191.081	3430.33	609.978	2996.33	894.644	4871.33	394.508	5947.33	631.101
K03566	4738	3174	3270	4242	3610	4096	3824	4722	3094	3476	3512	3672	6122	4008	3326	4282	4174	3462	2476	1980	2716	3376	4476	4044	2778	2684	2670	2096	3474	3024	4898	4110	4482	5596	7038	4846	137568	3727.33	876.578	3805.33	483.764	4229	1004.17	3178	960.772	2787.67	453.871	5161.67	1043.68
K01589	3448	2688	2622	3082	2604	3132	3112	3450	2786	2904	2900	3212	4902	3342	2870	3710	4202	2610	2792	2654	3254	4692	3042	2652	4748	4850	5014	3806	5072	5404	5484	4974	4700	5316	6448	5022	137500	2919.33	459.027	3020.22	250.57	3606	854.29	3181	776.745	4815.67	543.39	5324	615.162
K09811	3596	2632	2702	3454	2994	3776	3634	4022	3562	3714	3936	3670	4422	2932	2638	3086	3304	2950	3052	2458	3058	3858	2858	2324	4784	4840	4960	5056	5042	6196	4934	4344	4302	4830	5254	4284	137458	2976.67	537.499	3640.22	299.258	3222	626.795	2934.67	545.44	5146.33	525.489	4658	406.493
K23424	5592	3902	4618	3662	3190	3698	4078	4252	3966	4188	4908	3888	2876	2546	2294	2378	2798	2224	6240	4488	5094	2494	3976	2744	5100	4430	4232	8074	5456	8194	1880	1950	1912	1792	2062	2134	137310	4704	848.276	3981.11	474.53	2519.33	269.648	4172.67	1422.66	5914.33	1775.82	1955	124.546
K02478	5496	3442	4320	1902	1778	2294	2160	2696	2720	2014	2218	2368	5222	3022	2860	5386	8936	3660	2112	1878	2174	3128	2028	1732	5390	4860	4880	8214	6964	8268	4024	3432	3718	3864	4306	3552	137018	4419.33	1030.6	2238.89	324.668	4847.67	2273.27	2175.33	493.608	6429.33	1599.69	3816	320.132
K01684	2360	2068	2008	3780	3636	4158	4086	4592	4182	4250	4348	3858	5768	4154	3248	3944	3030	3290	3308	2638	3440	3284	2924	2460	4680	4454	4780	4786	5162	6560	3664	3428	3288	3878	3806	3534	136834	2145.33	188.312	4098.89	298.455	3905.67	1010.92	3009	399.263	5070.33	764.837	3599.67	225.876
K03744	4266	3070	3056	3766	3034	3624	3730	4204	3470	4180	4248	4104	4600	3386	2970	3668	4110	2966	2460	1978	2378	3106	2600	2072	4170	3962	4234	4894	4546	5874	4490	4296	4438	4810	5408	4366	136534	3464	694.588	3817.78	407.826	3616.67	649.263	2432.33	405.442	4613.33	698.178	4634.67	418.394
K07141	3758	2412	2734	3686	3582	4102	3926	4522	4142	4288	4462	4046	5228	4090	3402	3992	3422	3018	2552	2224	2848	2928	2238	1842	4962	4588	4894	4932	4530	6356	3920	3528	3418	4074	4006	3792	136444	2968	702.848	4084	319.54	3858.67	781.321	2438.67	415.26	5043.67	668.617	3789.67	265.045
K01284	5064	3720	3936	2920	2496	2868	2962	3510	2952	2894	2742	3164	6346	4158	3680	4948	5770	3786	2560	2044	2466	3648	2510	2380	4246	3830	3996	5926	5338	6672	4078	3538	3632	3980	4002	3642	136404	4240	721.731	2945.33	278.273	4781.33	1099.6	2601.33	544.699	5001.33	1158.68	3812	233.005
K07030	3732	3018	2814	2680	2360	3256	3018	2964	3246	2914	3152	3076	4784	3454	3266	4264	4140	2924	2808	2612	3392	3644	2174	1980	4774	4790	4792	5300	4936	6112	5022	4534	4786	5260	5532	4586	136096	3188	482.033	2962.89	288	3805.33	703.026	2768.33	656.729	5117.33	526.589	4953.33	393.037
K18707	2946	2592	2708	3456	3036	3804	3832	4504	4382	4192	4842	3914	4468	3534	3030	3634	4224	3278	3066	2498	2756	2822	2266	1812	5356	4754	4980	6800	5246	7886	3222	2968	3022	3428	3472	3366	136096	2748.67	180.47	3995.78	552.82	3694.67	551.928	2536.67	449.358	5837	1234	3246.33	212.902
K07535	2172	1490	1742	5638	5122	6014	5650	6716	5386	6224	6180	6100	3976	3046	2372	2282	1544	2772	2088	1780	2500	2648	2022	1692	4858	4752	5024	3718	4560	5188	3446	3076	3282	3586	4028	3284	135958	1801.33	344.85	5892.22	487.636	2665.33	820.306	2121.67	382.774	4683.33	520.201	3450.33	331.135
K14273	2610	2186	1822	3780	3188	3958	4158	4840	4340	4044	4258	4064	4512	3546	2630	2706	2456	2518	3050	2706	3528	3694	2154	1706	5390	5446	5290	5222	4966	6744	4140	4084	3874	4198	4232	3862	135902	2206	394.381	4070	444.996	3061.33	814.038	2806.33	776.462	5509.67	627.46	4065	160.782
K02200	4304	3298	3218	3560	3148	3914	4010	4600	3482	3804	4094	3468	5182	3782	2990	3738	3522	3034	2846	2312	2986	3746	3186	2538	4728	4722	4874	3556	4468	5050	4182	3770	3984	4110	3952	3744	135902	3606.67	605.232	3786.67	429.535	3708	797.928	2935.67	505.367	4566.33	530.924	3957	176.14
K00850	3034	2626	2694	2852	2512	3306	3508	3670	3950	3106	3640	3298	4954	3914	3346	3694	4032	2790	3326	3012	3458	3564	2318	1702	5072	4474	4618	5576	4802	6474	4464	4096	4060	4640	5052	4162	135796	2784.67	218.589	3315.78	443.755	3788.33	725.971	2896.67	737.583	5169.33	748.251	4412.33	387.44
K06001	3122	2862	2366	2754	2444	2970	3266	3198	3400	3422	3746	3338	4552	3596	3108	3420	3358	2986	2772	2394	3128	3134	1868	1644	4716	4606	4866	4832	4782	5918	5790	5116	4962	5888	6216	5096	135636	2783.33	384.09	3170.89	391.556	3503.33	558.619	2490	634.527	4953.33	481.509	5511.33	518.969
K02667	4368	3108	3346	3472	2906	3524	3936	4672	3926	4536	5132	3926	4104	3640	3262	3276	3936	3328	3006	2272	2584	2472	2826	2502	4652	3968	4170	6890	5004	7162	3224	2964	3106	3426	3712	3260	135598	3607.33	669.419	4003.33	683.506	3591	363.656	2610.33	264.234	5307.67	1382.28	3282	261.375
K01805	2766	2414	2422	3212	3160	4084	4102	4624	4338	3838	4482	4266	6000	4104	3468	3778	3186	3066	2762	2550	3052	3796	2284	1904	4894	4744	4964	4486	4708	6280	3746	3340	3268	3968	3888	3488	135432	2534	200.958	4011.78	521.5	3933.67	1081.82	2724.67	656.428	5012.67	642.645	3616.33	292.729
K19302	1754	1848	1572	3264	2996	3522	3584	4200	3508	3846	4098	3826	3658	2866	2264	3234	3062	2844	2176	2036	2664	3090	1906	1490	5268	5044	5314	5304	4910	6284	5408	4966	5126	5744	7456	5078	135210	1724.67	140.319	3649.33	385.715	2988	463.614	2227	569.391	5354	483.659	5629.67	937.675
K02016	3006	2532	2408	3782	3172	3622	3608	4304	3418	3834	3714	3720	5036	3690	3122	4510	4644	3426	2638	2234	2674	3456	2762	2572	4414	3960	4068	4984	4474	6066	4486	3884	4008	4482	4552	3840	135102	2648.67	315.609	3686	308.461	4071.33	763.421	2722.67	402.581	4661	776.837	4208.67	331.992
K00290	4022	3652	3328	2332	1994	2620	2776	3136	2886	2760	2828	3146	4350	3340	3078	4540	4888	3324	2526	2004	2688	3364	2022	1766	4452	4054	4290	5624	4552	6418	5572	4976	5148	5698	5896	5048	135098	3667.33	347.254	2719.78	368.461	3920	762.483	2395	588.153	4898.33	920.664	5389.67	382.347
K07498	4614	2590	3412	10520	7604	9142	9650	11600	8070	6860	7854	8122	5774	3246	2278	2554	1474	3596	1198	910	1380	914	2434	2104	894	932	936	654	988	1012	1970	1816	1976	1794	2076	2022	134970	3538.67	1017.93	8824.67	1529.46	3153.67	1484.45	1490	637.757	902.667	128.932	1942.33	113.204
K00294	4842	3482	3646	3392	2928	3504	3600	4130	3744	4158	4506	3792	5206	4162	3548	4448	4768	3588	2388	2036	2508	2948	2324	2188	3746	3604	3570	4660	4264	5332	4026	3778	3838	4178	4408	3724	134964	3990	742.396	3750.44	470.513	4286.67	656.078	2398.67	314.743	4196	700.75	3992	264.63
K02931	4026	3076	3360	3610	2978	3676	3706	4148	3592	3780	3916	3706	4704	3506	3154	3896	3966	3186	2826	2156	2684	3642	3012	2682	3890	3618	3764	4192	4222	5462	4360	3910	3992	4662	5268	4286	134614	3487.33	487.632	3679.11	314.549	3735.33	584.747	2833.67	487.832	4191.33	665.982	4413	498.44
K06987	4332	3364	3506	3230	2792	3262	3422	3660	3252	3146	3518	2988	4734	3628	3142	3900	3896	2908	3772	3120	3824	4982	3812	3548	4560	4924	4884	4212	4724	5280	3660	3254	3340	3286	3246	3412	134520	3734	522.727	3252.22	264.394	3701.33	646.742	3843	618.617	4764	361.711	3366.33	156.57
K07386	3860	2984	3114	4062	3376	4490	3922	4698	3844	3836	4008	4514	5058	3516	3038	3392	3160	3260	2364	2040	2860	3620	2740	2184	2808	2762	2974	3496	3608	4288	5156	4744	5002	5268	5792	4632	134470	3319.33	472.721	4083.33	415.271	3570.67	747.792	2634.67	576.67	3322.67	590.614	5099	416.073
K00208	3750	2832	3020	4468	3668	4300	4364	5418	3952	4746	4870	4512	5388	3872	3106	3670	4032	3226	2532	2130	2574	3026	2668	2236	3888	3762	3788	3392	3842	4796	3656	3526	3492	3750	4590	3626	134468	3200.67	484.934	4477.56	510.857	3882.33	820.743	2527.67	320.438	3911.33	468.018	3773.33	410.679
K01644	2942	2482	2374	4284	3620	4086	4188	5034	3766	4602	4506	4266	3826	2900	2432	2844	2584	2782	2506	2260	3026	3248	2678	1992	4352	4016	4388	4872	4718	5860	4446	4190	4106	4998	5024	4244	134442	2599.33	301.631	4261.33	428.113	2894.67	488.517	2618.33	468.945	4701	642.154	4501.33	410.453
K01208	2646	2196	2188	2578	2132	2872	2754	2974	3478	2764	3334	2912	6060	4816	3790	5064	6092	3504	2190	2066	2488	3434	1800	1442	4516	3870	4082	5922	4710	6940	4534	4344	4550	5134	5584	4662	134422	2343.33	262.148	2866.44	395.606	4887.67	1093.66	2236.67	685.602	5006.67	1187.55	4801.33	466.141
K06287	3168	2454	2586	3652	3090	3804	3868	4408	3716	4062	4006	4060	4402	3400	2694	3376	3574	3080	2780	2288	2886	3372	2480	1900	4456	4052	4394	4926	4602	6360	4478	4036	3942	4548	5464	4038	134402	2736	379.9	3851.78	364.334	3421	571.497	2617.67	511.869	4798.33	816.252	4417.67	571.229
K02864	3746	2732	2924	3386	2972	3692	3456	3714	3542	3666	3986	3838	4650	3510	2788	3560	3598	2990	2658	2414	2660	3486	2642	2200	4516	4002	4028	4682	4564	5872	4528	4086	4144	4924	5938	4260	134354	3134	538.632	3583.56	294.385	3516	648.276	2676.67	436.59	4610.67	680.759	4646.67	703.572
K00849	2982	1996	2058	3026	2598	3754	3686	3880	4232	3722	4038	4172	4608	3548	2678	3380	3482	3118	2568	2574	3192	3728	1674	1326	5690	5540	5660	5672	5330	7018	3916	3814	3710	4012	4210	3738	134330	2345.33	552.24	3678.67	538.59	3469	641.955	2510.33	900.762	5818.33	603.008	3900	189.019
K02575	4898	3914	3730	4114	3628	4244	4520	5048	4088	4940	4724	5372	4748	3262	2884	3282	3178	3590	1368	1078	1542	1500	1452	1158	1268	1166	1306	1148	1458	1684	7166	6398	6664	7910	9392	6314	134136	4180.67	628.004	4519.78	552.947	3490.67	656.108	1349.67	190.231	1338.33	202.841	7307.33	1179.53
K03685	3418	2590	2626	3720	2920	3928	3642	3692	3496	3708	3762	3858	4466	3360	2792	3676	3946	2980	2766	2494	2812	3636	2450	2204	4464	4346	4554	5020	4518	6256	4412	3910	3968	4498	5114	4120	134122	2878	468	3636.22	295.4	3536.67	623.898	2727	497.91	4859.67	721.946	4337	447.405
K01246	3634	2524	2828	3966	3290	4354	4254	4478	4116	4374	4576	4250	4702	3746	3096	3396	3502	3046	2554	2300	2768	3618	2586	2158	4382	4186	4314	3874	4422	5120	3974	3644	3696	3980	4600	3770	134078	2995.33	573.607	4184.22	381.73	3581.33	607.582	2664	515.296	4383	411.665	3944	350.517
K25151	2692	2078	2016	4076	3364	4098	3844	4646	4008	4412	4668	4130	3900	3554	2884	3360	3942	3110	2678	2574	3088	2876	2758	2190	5338	4762	4946	6686	5666	7094	3234	2966	3150	3154	2970	3166	134078	2262	373.679	4138.44	406.503	3458.33	424.033	2694	303.687	5748.67	946.761	3106.67	111.64
K05939	3084	2960	2316	4408	3726	4226	4532	5820	4524	4588	5018	4992	4794	3206	2880	3056	3194	2636	2520	2278	2758	3152	2730	2562	4978	4762	4782	3900	4456	4788	3522	3090	3156	3416	3982	3240	134032	2786.67	412.298	4648.22	585.984	3294.33	765.343	2666.67	293.745	4611	386.68	3401	327.137
K13015	3260	2522	2724	3856	3514	4004	3772	4572	4026	4454	4740	4350	4792	3922	3066	3752	3968	3136	2812	2346	3102	3036	2502	2124	4150	4020	3982	5170	4412	6340	3522	3374	3330	3812	4042	3434	133940	2835.33	381.389	4143.11	407.535	3772.67	633.19	2653.67	392.545	4679	924.253	3585.67	281.67
K03501	3470	2706	2678	3202	2700	3310	3350	3832	3300	3754	3996	3504	4444	3438	2962	3274	3782	2812	2678	2434	2894	3310	2446	2014	4868	4604	4672	5116	4678	6290	4396	4140	4252	4468	5348	4568	133690	2951.33	449.397	3438.67	389.602	3452	595.742	2629.33	444.1	5038	640.999	4528.67	429.358
K00102	4318	2952	3202	4582	3716	4256	4578	5226	3940	4454	4682	4286	6438	3958	3390	4172	3914	3314	2814	1988	2562	3288	3094	2654	3308	2920	3304	3334	3356	4738	3550	3280	3374	3712	3474	3256	133384	3490.67	727.314	4413.33	438.907	4197.67	1148.12	2733.33	455.063	3493.33	631.245	3441	173.808
K02123	3568	2680	2750	2426	2122	2668	2568	2620	2910	2648	2636	2702	4412	3286	2536	4166	4520	2786	2722	2248	2966	3390	2388	2004	5666	5674	5892	4990	5070	5776	5118	4678	5008	5444	5272	4936	133246	2999.33	493.722	2588.89	216.16	3617.67	862.266	2619.67	508.858	5511.33	382.597	5076	267.668
K03101	3294	2492	2646	3134	2846	3334	3486	3780	3406	3488	3470	3326	4594	3512	2972	3846	4612	3286	2502	2268	2722	3406	2090	1726	4922	4584	4660	5558	4870	6940	4162	3956	4032	4362	4786	4114	133184	2810.67	425.602	3363.33	259.779	3803.67	681.842	2452.33	579.222	5255.67	893.802	4235.33	302.902
K01604	2456	2442	2332	3708	3664	3920	3850	3944	3828	3844	3896	3652	4374	3560	2974	3718	4348	3168	3176	2854	3124	2570	2252	2032	5146	4348	4482	6240	5018	6758	3510	3322	3438	3780	3842	3446	133016	2410	67.9117	3811.78	110.22	3690.33	583.72	2668	466.423	5332	967.666	3556.33	207.3
K16089	4852	2900	3770	2466	2596	3296	3238	3590	3216	2806	3064	3334	3624	2798	2830	4454	7410	3452	1996	1572	1882	2804	2056	1726	4690	4322	4518	7684	5974	7256	3224	3244	3212	3600	5904	3602	132962	3840.67	977.917	3067.33	370.788	4094.67	1734.12	2006	429.31	5740.67	1465.51	3797.67	1048.11
K06959	1998	2454	1842	2602	2494	3196	3234	3290	3944	2730	3296	3096	4680	3918	3290	4874	5776	4082	2762	2354	2706	3048	1850	1614	5288	5204	5256	6706	5176	7510	3576	3272	3294	3662	5008	3786	132868	2098	318.019	3098	442.457	4436.67	866.479	2389	559.691	5856.67	1002.83	3766.33	641.358
K02356	4106	3082	3216	3434	3042	3678	3782	4094	3666	3910	3962	4088	4738	3714	2982	3464	3942	3040	2710	2256	2782	3112	2412	2088	4000	3590	4080	4292	4128	5334	4354	4082	4158	4408	4976	4156	132858	3468	556.572	3739.56	338.476	3646.67	652.067	2560	377.781	4237.33	586.13	4355.67	329.055
K01814	3842	2984	3144	3560	2932	3678	3648	4164	3682	3988	4050	3882	5142	3860	3384	4280	4108	3352	2646	2328	2840	3414	2718	2344	4446	4026	4186	4988	4538	6052	3354	3266	3124	3492	3970	3436	132848	3323.33	456.247	3731.56	363.634	4021	664.912	2715	399.1	4706	737.545	3440.33	290.223
K00283	4360	3332	3536	3086	2624	3482	3606	3854	3750	3804	4286	3676	4302	3864	3082	3872	3920	3180	3166	2646	3056	2804	2300	2052	4642	4164	4430	5128	4200	6286	3660	3734	3436	3882	3916	3710	132828	3742.67	544.27	3574.22	478.246	3703.33	473.189	2670.67	431.825	4808.33	805.199	3723	172.718
K00091	3226	2396	2702	4022	3324	4292	3952	4504	4160	4210	4314	4076	4462	3656	2920	3568	4172	3348	2548	2164	2660	3128	2188	1774	4550	4154	4088	4648	4108	5284	4254	4032	3678	4066	4398	3760	132786	2774.67	419.744	4094.89	333.931	3687.67	557.527	2410.33	471.458	4472	464.215	4031.33	277.017
K02042	2912	2230	2446	4370	4198	4768	4532	5040	4266	4098	4328	4358	5830	3936	3552	3728	3068	3122	2622	2500	2732	3750	2540	2382	4620	4260	4616	3768	4000	5024	3054	2864	2958	3554	3392	3232	132650	2529.33	348.553	4439.78	297.073	3872.67	1016.85	2754.33	501.721	4381.33	460.731	3175.67	265.491
K04749	3064	2156	2336	3846	3226	4114	4022	4284	4292	4030	4566	4020	5266	4222	3554	3816	3676	3288	2432	2170	2824	2706	2104	1698	4478	4098	4276	5132	4384	6406	3664	3452	3328	3900	4180	3616	132626	2518.67	480.772	4044.44	371.832	3970.33	705.897	2322.33	417.508	4795.67	864.114	3690	309.205
K02520	3722	2912	3158	3458	3140	3706	3458	3834	3386	3494	3768	3904	4648	3290	3116	3450	3668	3368	2688	2338	2788	3402	2734	2228	4110	3736	3698	4420	4304	5636	4504	4216	4234	4610	5186	4156	132468	3264	415.273	3572	247.117	3590	549.365	2696.33	413.665	4317.33	709.099	4484.33	387.553
K25153	3104	2342	2752	4044	3632	4202	4312	4736	4038	4308	4692	3892	3544	3094	2732	3092	4194	3128	3188	2506	2858	2778	3132	2608	4726	4056	4132	7172	5286	7516	2888	2582	2756	2602	2674	2912	132210	2732.67	381.368	4206.22	357.297	3297.33	509.242	2845	274.141	5481.33	1513.88	2735.67	141.418
K18336	3406	2680	2936	5056	4532	5228	5258	6162	4588	5844	6082	5042	5350	3648	2976	3168	2594	3166	2040	1686	2128	2746	2292	2128	3888	3608	3804	3444	3660	4470	2916	3022	2816	3300	3434	3102	132200	3007.33	368.219	5310.22	599.935	3483.67	975.704	2170	346.798	3812.33	357.477	3098.33	233.298
K03704	2970	2350	2468	4152	3592	4414	4342	5090	4212	4364	4448	4154	4404	3210	2666	3134	2976	3026	2534	2284	2658	2746	2340	1918	3958	3770	3794	3862	3764	4930	4198	3832	4060	4650	6240	4384	131894	2596	329.223	4307.56	389.964	3236	601.981	2413.33	300.849	4013	455.132	4560.67	868.62
K11689	4296	3000	3232	4322	3402	4162	4294	4722	4138	3900	4188	3856	4088	2964	2464	3028	3234	2598	3010	2498	2536	3332	2658	2470	5118	4806	5092	4616	4312	6116	3380	3034	3088	3300	3300	3116	131670	3509.33	691.078	4109.33	366.195	3062.67	577.22	2750.67	347.127	5010	620.593	3203	141.069
K02950	4316	3698	3626	3234	2838	3310	3182	3544	3076	3180	3186	3266	4882	3542	3368	4044	3948	3620	2892	2520	2888	3720	3158	2868	3412	3296	3242	3828	3660	4580	4484	4248	4214	4890	5374	4474	131608	3880	379.299	3201.78	188.169	3900.67	543.498	3007.67	403.743	3669.67	498.555	4614	443.674
K04517	3088	2492	2456	3074	2784	3524	3656	3758	4004	3826	3914	3646	4602	3662	2822	3480	3410	2990	2594	2470	3010	3080	2084	1636	4886	4786	5284	4516	4296	5830	4382	4076	3924	4594	4854	4108	131598	2678.67	354.95	3576.22	400.987	3494.33	627.493	2479	551.932	4933	553.405	4323	353.643
K03742	3650	2838	2870	3828	3288	3828	3904	4096	4054	3970	4170	4012	4066	3330	2862	3350	3886	2856	2788	2654	3024	3532	2256	1896	4720	4586	4690	6172	5082	7194	3102	2916	2784	2968	3320	2974	131516	3119.33	459.849	3905.56	259.115	3391.67	504.404	2691.67	574.49	5407.33	1053.03	3010.67	183.048
K00241	3592	2610	2972	3432	3150	3846	3696	4188	4026	4112	4092	4124	5140	3738	2976	3620	3542	3046	2714	2286	2834	3332	2278	1950	4622	4148	4432	4336	4422	5512	3784	3422	3482	3896	4358	3694	131404	3058	496.617	3851.78	359.849	3677	781.681	2565.67	494.223	4578.67	482.37	3772.67	338.112
K02488	3078	3032	2838	3916	3288	4016	4284	4776	4160	4564	4794	4348	4272	3446	2968	3352	3366	2928	2826	2230	2528	2652	2920	2284	3808	3346	3402	6280	4682	6656	3480	3060	3160	3662	3742	3186	131330	2982.67	127.379	4238.44	471.781	3388.67	484.685	2573.33	280.661	4695.67	1458.52	3381.67	286.003
K11747	3052	2472	2434	3052	2506	3198	3172	3950	2774	3116	3432	3330	3036	2468	2056	2728	2910	2384	3816	2964	3664	4680	3878	3344	5614	5588	5384	4464	5298	5742	3882	3538	3780	3826	5158	4038	130728	2652.67	346.354	3170	405.892	2597	364.017	3724.33	578.224	5348.33	462.351	4037	572.754
K10947	2606	1628	1980	4080	3768	4584	4642	5350	4576	5216	5396	4810	4126	3478	2424	2680	2348	2860	2326	2194	2804	2502	2112	1454	4334	4108	4036	6604	5744	6930	3106	2906	2766	3312	3760	3150	130700	2071.33	495.356	4713.56	555.522	2986	689.067	2232	453.883	5292.67	1304.29	3166.67	348.025
K03147	3232	3028	2720	5060	4380	4756	4618	5544	4212	4880	5094	4944	4264	3386	3136	3462	3286	4058	2752	2142	2706	2252	3710	3296	3208	3088	3172	3278	3382	3682	3136	3070	2968	3326	4110	3336	130674	2993.33	257.754	4832	400.421	3598.67	453.736	2809.67	602.986	3301.67	211.143	3324.33	410.984
K02986	3760	2876	2994	3552	2946	3596	3486	3890	3372	3700	3780	3726	4938	3584	2906	3812	4274	3208	2650	2136	2622	3074	2926	2430	4052	3578	3678	4234	4246	5052	4030	3940	3936	4444	5114	3942	130484	3210	479.954	3560.89	279.201	3787	736.913	2639.67	337.251	4140	527.039	4234.33	473.417
K00942	3580	2682	2816	3020	2708	3216	3340	3580	3566	3460	3836	3686	4432	3202	2632	3508	3726	2864	2708	2224	2840	3200	2470	1912	4462	4162	4442	4762	4442	6222	4490	4192	3896	4686	5264	4174	130402	3026	484.434	3379.11	352.179	3394	647.931	2559	458.432	4748.67	746.369	4450.33	483.642
K07652	3412	3020	2946	4182	3712	4674	4898	4894	5478	4426	5002	4626	4882	4426	3088	3900	4106	3778	3640	2760	3084	3878	2300	1772	2960	2622	2682	3074	2586	3854	3110	2900	2918	3334	4238	3214	130376	3126	250.432	4654.67	509.967	4030	609.305	2905.67	798.715	2963	478.243	3285.67	495.82
K02926	3642	2656	3042	3070	2650	3372	3294	3782	3416	3400	3800	3446	4490	3364	2752	3426	3702	2944	2818	2350	2774	3544	2626	2050	4164	4184	4068	4512	4196	5862	4402	3930	4012	4656	5612	4098	130106	3113.33	496.855	3358.89	349.375	3446.33	615.83	2693.67	506.354	4497.67	685.12	4451.67	629.463
K12976	1912	2032	1588	4200	3210	3656	3476	5022	3106	3486	3876	3528	7192	5042	3672	6156	4848	4046	2518	2440	3198	3728	3226	2700	3562	3380	3498	3692	4472	5286	3116	2714	3020	3060	3230	3206	130094	1844	229.678	3728.89	585.403	5159.33	1318.14	2968.33	500.034	3981.67	748.021	3057.67	186.888
K02536	3968	3124	3158	3288	2704	3418	3814	4396	3388	3814	3884	4082	3942	3034	2488	3470	4358	2876	2770	2230	2610	3220	2528	2060	4852	4464	4608	5808	5014	6258	3186	3288	3136	3516	3792	3290	129836	3416.67	477.771	3643.11	499.961	3361.33	699.676	2569.67	410.259	5167.33	711.405	3368	245.403
K07133	1766	1966	1660	2864	2274	2280	2192	1608	2670	1826	2098	1314	4042	3360	2792	4868	7212	3310	2384	1924	1968	1864	1686	1332	6570	5736	5840	12334	7152	11574	3254	3094	2946	3440	3512	3110	129822	1797.33	155.388	2125.11	488.493	4264	1612.38	1859.67	346.24	8201	2962.09	3226	218.017
K07642	1812	1988	1572	2734	2364	3142	3118	3024	3534	2996	3414	3148	4160	3582	2714	3216	2756	2750	2640	2442	3164	3194	1698	1356	5602	5518	5630	4636	4570	6042	5126	4698	4600	5410	6430	4758	129538	1790.67	208.819	3052.67	347.027	3196.33	583.7	2415.67	755.614	5333	594.214	5170.33	687.686
K00015	3136	2262	2478	4618	3978	4694	4750	5510	4536	5124	5574	4822	4688	3654	2908	3292	2838	3446	2134	1858	2448	2632	2628	2596	4056	3730	3778	3922	3660	4864	3088	2918	2978	3262	3464	3166	129490	2625.33	455.246	4845.11	497.815	3471	673.038	2382.67	319.138	4001.67	445.754	3146	199.275
K01342	3422	2328	2820	4176	3302	4088	4224	4516	3826	4248	4322	4292	6150	4228	3842	4418	4052	3674	2290	2016	2618	3060	2106	1944	4194	3944	4048	4662	3902	5010	3050	2840	2708	2930	3306	2836	129392	2856.67	547.921	4110.44	355.897	4394	900.193	2339	427.721	4293.33	446.04	2945	210.07
K06980	3226	2358	2520	3238	2880	3322	3274	3970	3254	3658	3612	3478	4306	3110	2740	3088	2854	2508	2556	2218	2648	3540	2420	1804	4696	4512	4600	3914	4158	5394	4972	4424	4604	5076	6034	4422	129388	2701.33	461.538	3409.56	312.568	3101	631.705	2531	578.137	4545.67	509.047	4922	610.227
K21401	2102	1638	1568	3630	3116	3866	3712	4082	3360	3868	3582	3452	4040	2844	2646	2750	2010	2300	2738	2494	3218	3772	2406	1890	4964	5274	5382	4180	5020	5832	4880	4100	4256	4872	5274	4242	129360	1769.33	290.216	3629.78	294.629	2765	697.496	2753	661.373	5108.67	550.721	4604	469.694
K02654	3666	2636	2618	3272	2770	3054	3384	3986	3232	3612	3822	3466	4652	3582	2800	3288	3172	2694	2534	2346	2838	3454	2282	2110	4534	4398	4328	4624	4446	6016	4332	3918	3798	4420	4992	3988	129064	2973.33	599.934	3399.78	376.208	3364.67	709.38	2594	489.048	4724.33	641.208	4241.33	440.207
K19694	3340	2592	2414	2454	2078	2902	2636	2766	3358	2198	2388	2500	4854	3448	3038	5218	8220	4210	2332	2138	2386	2494	1904	1558	4422	4478	4434	6812	6076	7554	3770	3598	3812	3356	3606	3692	129036	2782	491.37	2586.67	387.841	4831.33	1851.96	2135.33	351.28	5629.33	1379.46	3639	162.947
K14161	3640	2544	2660	3782	3286	3918	3670	4398	3280	3862	3760	3612	4188	3560	3086	3310	2870	2826	2828	2344	3228	3786	3048	2608	4204	3906	4300	4032	4766	4908	3962	3664	3440	3890	4180	3626	128972	2948	602.09	3729.78	339.071	3306.67	512.123	2973.67	506.262	4352.67	401.61	3793.67	267.161
K03589	3702	2760	2682	3000	2682	3446	3622	4016	3492	3692	3880	3606	4114	3026	2656	3212	3462	2854	2618	2266	2842	3486	2330	1882	4146	4004	4308	4618	4528	5550	4370	3978	3960	4490	5244	4176	128700	3048	567.722	3492.89	417.626	3220.67	519.143	2570.67	554.743	4525.67	551.625	4369.67	477.006
K06024	3186	2536	2526	3628	3016	3618	3612	3926	3514	3918	3990	3528	4206	3188	2758	3374	3152	2776	2546	2274	2802	3004	2600	1962	4518	4192	4284	4536	4372	5878	4168	3770	4052	4370	4806	3954	128540	2749.33	378.197	3638.89	295.968	3242.33	530.876	2531.33	372.012	4630	625.621	4186.67	364.256
K01668	5326	3938	4220	2132	2024	2444	2526	2536	2944	2686	3010	2622	5576	4400	3604	4402	4672	3278	3042	2578	3294	3050	2372	2166	4474	3522	3850	4516	4128	5434	3992	3716	3884	4158	3876	4128	128520	4494.67	733.633	2547.11	326.697	4322	813.998	2750.33	443.784	4320.67	662.977	3959	167.818
K00570	3036	2312	2328	4456	3978	4584	4782	5668	4496	4830	5028	4418	4160	3384	2574	3032	2718	3028	2494	2068	2622	2812	2470	1744	3424	3224	3502	3548	3634	4618	3902	3474	3752	3880	4656	3884	128520	2558.67	413.46	4693.33	472.129	3149.33	569.572	2368.33	391.742	3658.33	490.25	3924.67	392.919
K03584	3270	2630	2772	3082	2624	3366	3236	3504	3574	3486	3540	3290	4080	3126	2580	2924	3552	2902	2746	2376	2962	3628	2394	1974	4444	4202	4470	4874	4700	6204	4286	3956	3966	4426	5034	4108	128288	2890.67	336.097	3300.22	300.404	3194	539.063	2680	575.366	4815.67	718.117	4296	405.336
K07673	2964	2428	2474	2928	2456	3704	3812	3738	4184	3602	4220	3702	5890	4936	3612	4018	4028	3360	1878	1852	2376	1980	1324	1194	5344	4924	4918	3518	3344	4668	4124	4022	3810	4490	4534	3924	128280	2622	297.072	3594	566.862	4307.33	942.627	1767.33	438.263	4452.67	822.469	4150.67	298.928
K21834	3098	2534	2616	2898	2710	3532	3814	3886	3982	3922	4318	3864	3322	2590	2144	2888	2764	2834	2504	2248	2740	2284	1714	1256	5302	4842	4898	7216	5058	8124	3734	3566	3412	3820	4116	3378	127928	2749.33	304.725	3658.44	526.926	2757	386.27	2124.33	545.226	5906.67	1404.83	3671	278.622
K12405	2734	1974	1972	4208	3824	4546	4130	4724	3880	4288	4546	4624	3654	2908	2666	2372	1838	2530	3082	2620	3346	3852	2632	2396	4526	4450	5068	4626	4994	5450	3254	3124	3152	3190	3472	3188	127840	2226.67	439.365	4307.78	325.139	2661.33	604.168	2988	547.014	4852.33	385.585	3230	126.352
K19231	1896	3198	1552	5744	4192	4948	5270	7166	4580	5798	5726	5680	5894	4164	3374	3262	3508	2594	1548	1684	1836	2802	2224	1576	2504	2304	2324	3268	3236	3818	3424	2842	3136	3550	3828	3316	127766	2215.33	868.222	5456	859.129	3799.33	1142.62	1945	487.045	2909	621.991	3349.33	340.286
K07147	3482	2460	2756	4336	3866	4334	4442	5186	3928	4932	4776	4470	5230	3672	2926	3348	3044	3262	2460	1890	2332	3070	2528	2166	3850	3536	3612	3488	3522	4580	3542	3070	3182	3472	3672	3270	127692	2899.33	525.861	4474.44	435.226	3580.33	848.637	2407.67	396.992	3764.67	420.256	3368	230.873
K08151	3048	2502	2666	3524	3064	3798	3936	4238	3824	4004	3912	3712	5762	4558	3214	4240	3960	3682	2314	2238	2742	2526	1916	1460	3886	3564	3950	3186	3570	4234	4098	3586	3540	4012	5294	3868	127628	2738.67	280.159	3779.11	332.936	4236	878.63	2199.33	456.669	3731.67	367.649	4066.33	641.592
K21472	3740	2526	2510	2932	2692	3296	3236	3122	3050	3252	3468	3180	4528	3762	3030	3524	3086	2754	2446	2300	2638	3732	2478	2090	4806	4548	4686	4302	5294	5590	3972	3696	3698	4186	5262	3928	127340	2925.33	705.567	3136.44	225.709	3447.33	641.588	2614	577.995	4871	482.168	4123.67	587.378
K07068	2452	1756	1908	5380	5090	5562	5510	6698	5414	5966	6240	6034	3590	3048	2304	2618	1876	3072	1940	1886	2586	2186	1512	1576	3946	3820	4042	3848	3884	4922	2790	2708	2702	2960	2746	2714	127286	2038.67	365.936	5766	505.242	2751.33	612.91	1947.67	399.018	4077	421.462	2770	98.6712
K04088	4020	3290	3426	3760	3318	3990	4134	4796	3922	4196	4532	4024	4016	2850	2534	2880	3114	2812	2978	2246	2722	2848	3026	2610	4236	4070	3910	4820	4214	5458	3188	2934	3020	3100	2970	3000	126964	3578.67	388.208	4074.67	426.075	3034.33	515.282	2738.33	286.827	4451.33	581.454	3035.33	93.2838
K00179	2994	2566	2452	2780	2696	3190	3508	3520	4192	3814	4202	3186	3654	3640	2844	4112	4938	3430	3338	2736	3052	1608	1900	1452	4540	4092	4082	8072	4676	7772	3030	3018	2720	3094	3074	2944	126918	2670.67	285.757	3454.22	549.02	3769.67	704.928	2347.67	797.167	5539	1863.43	2980	137.602
K02557	3468	2856	2810	3470	3026	3754	3676	4550	3884	3696	3774	3774	4406	3114	2982	3700	4394	3392	3340	2512	2818	3612	2964	2476	3982	3716	4068	5222	4066	5944	2948	2614	2772	3022	3162	2950	126914	3044.67	367.338	3733.78	398.077	3664.67	620.704	2953.67	452.637	4499.67	879.134	2911.33	192.739
K11175	3406	2494	2360	3376	2780	3620	3300	4006	3346	3766	3792	3464	3986	2990	2540	3190	3474	2684	2786	2300	2774	3326	2578	2000	4314	4198	4328	4520	4536	5772	4076	3798	3972	4162	4902	3882	126798	2753.33	569.183	3494.44	357.94	3144	532.938	2627.33	455.62	4611.33	583.214	4132	399.147
K02292	4352	3338	3282	4146	3800	4166	4224	4644	3726	4556	4722	3818	3998	3042	2620	2484	2310	2432	3184	2608	3402	4048	3036	2878	3736	3904	3690	3348	3626	4670	3148	2990	3212	3192	3332	3012	126676	3657.33	602.25	4200.22	376.099	2814.33	632.505	3192.67	498.174	3829	450.21	3147.67	129.11
K01488	3226	2624	2476	3426	3108	3964	3926	4228	4092	4258	4410	4436	4054	3402	2898	3398	2590	3450	2294	2186	2752	3302	1930	1696	3318	2946	3398	4064	3928	5022	4348	3978	4114	4536	4960	3884	126622	2775.33	397.242	3983.11	449.243	3298.67	505.315	2360	583.345	3779.33	734.853	4303.33	401.215
K01591	3234	2394	2506	3036	2694	3372	3312	3858	3298	3564	3680	3546	4564	3184	2534	3364	3660	2788	2578	2180	2742	3372	2538	2144	4626	4506	4422	4992	4536	6032	3964	3558	3646	4116	4390	3664	126594	2711.33	456.094	3373.33	349.971	3349	718.24	2592.33	448.21	4852.33	611.154	3889.67	324.773
K18139	3534	2934	2886	2956	2636	3584	3756	3980	3954	3646	3950	3604	4414	3068	3078	3086	3864	2514	2912	2170	2554	1954	2058	1644	4344	4136	4110	5144	4584	5928	3542	3556	3714	3570	5202	3906	126472	3118	361.065	3562.89	467.784	3337.33	680.798	2215.33	452.01	4707.67	708.683	3915	645.583
K02195	4098	2978	3186	3552	3208	3638	3510	3956	3444	3772	3888	3508	4864	3660	3234	3468	3378	3090	2910	2344	2872	3302	2656	2300	3946	4064	4238	4128	4416	5340	3220	3100	3012	3406	3422	3256	126364	3420.67	595.736	3608.44	233.702	3615.67	641.964	2730.67	379.241	4355.33	508.159	3236	162.987
K01082	2902	2554	2206	3136	2686	3296	3224	3866	3044	3326	3352	3448	4032	2904	2612	3084	3162	2746	3032	2504	3120	3528	2752	2266	4348	4094	4494	4342	4386	5316	4536	4154	4066	4642	5204	3988	126352	2554	348	3264.22	318.068	3090	504.777	2867	454.83	4496.67	422.309	4431.67	460.277
K17286	3398	2660	2898	3786	3318	3738	3880	4318	3842	4306	4434	3908	4476	3692	2978	3386	3294	3010	2650	2460	2870	2968	2794	2410	3844	3414	3560	4680	3746	5456	3320	3380	3152	3440	3444	3368	126278	2985.33	376.671	3947.78	351.063	3472.67	557.31	2692	225.112	4116.67	790.761	3350.67	107.946
K00252	4184	2904	3328	3280	3072	3164	3310	3742	2868	3546	3460	3410	4568	3296	3140	3504	3454	2912	2756	2318	2850	3358	3410	3230	3278	2782	2916	3036	3310	4138	4794	4462	4330	4762	5188	4170	126230	3472	652.037	3316.89	261.872	3479	575.686	2987	423.157	3243.33	483.536	4617.67	370.026
K01192	2156	2012	1708	2636	2370	2970	3088	3136	3552	2952	3018	2964	5230	3894	3358	4134	4376	2930	2458	2336	3156	3308	1674	1314	5620	5230	5432	5912	5698	6906	3470	3070	3270	3612	3610	3648	126208	1958.67	228.712	2965.11	326.766	3987	804.925	2374.33	788.16	5799.67	589.73	3446.67	231.595
K01634	1904	1714	1524	2188	1948	2580	2600	2566	2942	2312	2678	2414	3620	3286	2428	2676	2364	2422	3138	2946	4198	4150	2004	1564	4414	4442	4470	3922	4266	5198	6514	5802	5944	6422	7034	5600	126194	1714	190	2469.78	292.483	2799.33	528.268	3000	1080.16	4452	418.062	6219.33	533.879
K00282	3612	3104	3266	2970	2668	3382	3360	3910	3648	3598	3832	3412	3862	3372	2672	3372	3582	2794	3154	2686	2872	2670	2238	1898	4662	4264	4522	5152	4084	5996	3568	3430	3500	3536	3818	3624	126090	3327.33	259.494	3420	397.905	3275.67	458.825	2586.33	450.76	4780	699.743	3579.33	133.834
K21393	3710	2630	2934	4708	3890	4838	4514	5568	4392	4704	4674	4512	4978	3094	2666	2550	2592	2522	2734	2162	2358	3010	2666	2338	4578	4226	4478	3718	4014	5662	2586	2292	2284	2536	2574	2396	126088	3091.33	556.925	4644.44	442.486	3067	959.52	2544.67	313.399	4446	672.624	2444.67	138.948
K08223	2440	2054	2046	4514	4152	4774	4850	5520	4334	5004	5526	4556	4160	3318	2304	2804	2546	2650	2550	2326	2854	2176	2120	1790	4758	4412	4600	5532	4366	6822	2250	2324	2290	2418	2672	2270	126082	2180	225.202	4803.33	483.291	2963.67	676.794	2302.67	368.219	5081.67	951.731	2370.67	159.01
K25181	2162	2172	2026	4110	3774	4716	4910	5014	5156	4676	5308	4858	3534	2892	2274	2866	3158	3202	2270	2060	2320	2122	1724	1212	5668	5164	5110	6064	4456	6942	2282	2338	2140	2508	2448	2394	126030	2120	81.5598	4724.67	493.228	2987.67	425.842	1951.33	418.735	5567.33	866.419	2351.67	130.656
K15781	2656	2328	1936	2158	1862	2602	2482	2724	2248	2264	2498	2498	3268	2326	2034	2322	1890	1918	2450	2170	3082	4352	2310	1956	4552	4750	4830	3730	4778	5004	6772	6152	6078	7060	7914	5896	125850	2306.67	360.474	2370.67	263.053	2293	514.329	2720	885.626	4607.33	453.692	6645.33	764.755
K07278	3766	3228	2928	2758	2276	2604	2594	3112	2790	2358	2470	2200	4042	2848	2732	3492	3772	2618	2658	2024	2618	3800	2894	2690	5156	5346	5528	4478	5186	5768	3940	3742	4006	4148	4868	3838	125276	3307.33	424.595	2573.56	286.663	3250.67	597.94	2780.67	578.646	5243.67	438.976	4090.33	405.663
K00702	2268	2420	1914	2116	2196	3038	2676	2566	3162	2346	2872	2824	3252	3104	2216	3058	3396	2534	2782	2576	3396	2506	1262	948	5112	5102	5176	4842	4438	6332	5718	5176	5086	5820	6002	4974	125206	2200.67	259.633	2644	367.992	2926.67	454.763	2245	942.269	5167	632.712	5462.67	435.112
K16566	2250	1894	1930	3312	2818	3562	3494	3832	3768	3470	3594	3684	4742	3602	3060	3000	2928	2372	2454	2276	2538	3682	1908	1722	4628	4172	4362	4214	3726	5106	4478	4330	4278	4698	4852	4454	125190	2024.67	195.973	3503.78	302.047	3284	814.395	2430	689.523	4368	466.171	4515	220.246
K08086	4694	3576	3538	1950	1882	2588	2742	2678	2472	2336	2692	2300	3874	2632	2530	2820	3364	2062	3504	2556	3366	4162	3554	3216	5272	5410	5244	4566	4612	5932	3814	3592	3630	3686	4630	3704	125180	3936	656.722	2404.44	317.172	2880.33	644.829	3393	521.964	5172.67	515.803	3842.67	393.077
K14447	1826	1804	1354	3468	3020	3324	3076	3854	2926	3326	3096	3274	3428	2330	2184	2598	2040	2640	2462	2270	3064	3772	2706	2342	3892	3760	3918	2782	3980	4330	6140	5632	5466	6348	7164	5308	124904	1661.33	266.386	3262.67	281.645	2536.67	494.505	2769.33	569.663	3777	523.534	6009.67	692.024
K07712	3174	2542	2304	4014	3480	3982	4008	4918	3482	4666	4878	4270	4342	3512	3272	3322	3348	2774	2496	1976	2424	3100	3092	2990	3744	3708	3706	3614	3752	4318	3320	3114	3092	3280	3534	3222	124770	2673.33	449.624	4188.67	541.874	3428.33	512.277	2679.67	455.467	3807	255.094	3260.33	161.282
K06194	3150	2212	2180	2806	2366	3198	3262	3628	3448	3174	3530	3260	4538	3630	2640	3256	3438	2580	2434	1936	2930	2822	1696	1338	4904	4448	4488	3944	3712	5372	4786	4194	4494	4694	5584	4622	124694	2514	551.025	3185.78	389.019	3347	721.564	2192.67	638.901	4478	608.872	4729	466.561
K07469	3172	2386	2378	3720	3062	3658	3826	3952	3688	4118	4440	3820	4926	3862	3296	3234	2978	2820	2446	2378	2700	3124	2106	1810	4164	3990	4146	4156	4460	5290	3260	3092	3166	3730	3790	3532	124676	2645.33	456.124	3809.33	373.81	3519.33	775.826	2427.33	457.565	4367.67	476.922	3428.33	297.6
K08296	2762	2210	2400	3214	3034	3622	3692	4220	3724	3806	4114	3986	3586	2692	2254	2752	2878	2246	2170	1988	2364	2746	1988	1498	5420	5410	5360	4582	4112	6160	4140	3716	3746	4038	4300	3612	124542	2457.33	280.431	3712.44	390.498	2734.67	493.41	2125.67	418.438	5174	721.292	3925.33	273.243
K19611	4672	3174	3890	816	796	1424	1280	1496	1648	1018	934	1304	4940	2968	2602	6390	11468	4010	1380	1456	1242	2768	1280	922	5614	5232	5468	10762	8056	10552	2642	2368	2638	2350	2660	2312	124532	3912	749.242	1190.67	310.137	5396.33	3276.82	1508	643.867	7614	2569.68	2495	167.288
K00803	2122	1666	1634	3344	2934	3312	3294	3714	3378	3194	3514	3000	4456	3716	3126	3174	3022	2630	2262	2096	3212	2612	1704	1250	4140	3534	3826	4836	4016	5458	5110	4772	4772	5570	5354	4588	124342	1807.33	272.979	3298.22	239.936	3354	642.531	2189.33	686.496	4301.67	713.573	5027.67	382.475
K01989	4076	2974	3286	8450	6938	8252	8902	11776	6838	12108	11558	9750	3038	2190	1504	1346	1038	1938	1008	880	1074	946	1252	1164	1278	1198	1270	1476	1062	1632	662	648	672	690	684	668	124226	3445.33	568.015	9396.89	2026.44	1842.33	716.577	1054	138.391	1319.33	203.661	670.667	15.1614
K05341	2012	1592	1592	2442	2292	3064	2842	2790	3474	2574	2746	3034	4244	3156	2636	3142	3200	2488	2578	2544	2854	3750	2454	1816	6204	5864	6488	4684	5280	6200	4260	3700	3772	4232	4144	4020	124164	1732	242.487	2806.44	357.148	3144.33	616.714	2666	632.53	5786.67	680.506	4021.33	237.408
K04768	3000	2624	2304	2470	2156	2750	2944	2954	3092	2970	3412	2896	3798	2828	2422	2884	2722	2584	3254	2628	3582	3260	2840	2122	4318	4044	4134	4306	4364	5442	4990	4302	4518	5130	5518	4360	123922	2642.67	348.375	2849.33	361.699	2873	483.217	2947.67	527.12	4434.67	508.508	4803	486.127
K00969	3254	2654	2720	3204	2800	3478	3468	3696	3394	3614	3650	3492	4084	3368	2508	3000	3256	2770	2628	2254	2806	3260	2160	1900	4036	3920	4238	4694	4344	5774	3964	3528	3898	4098	4276	3658	123846	2876	329.017	3421.78	275.968	3164.33	549.354	2501.33	494.717	4501	679.026	3903.67	276.242
K02013	3084	2342	2352	2648	2168	2970	2750	3166	2776	3058	3236	3250	3614	2410	2396	3550	3622	2952	2528	2170	3066	3854	2502	2328	4360	3990	4252	4286	4820	5528	4890	4386	4218	4728	5102	4336	123688	2592.67	425.537	2891.33	348.666	3090.67	588.605	2741.33	623.457	4539.33	554.419	4610	350.23
K01817	2998	2106	2346	3524	2920	3554	3664	4398	3664	3666	4012	3662	3996	2978	2492	3224	3268	2614	2650	2430	2716	3084	2418	1912	4718	4396	4834	4950	4832	6230	3150	2990	2908	3132	3962	3050	123448	2483.33	461.586	3673.78	394.373	3095.33	541.67	2535	389.931	4993.33	634.863	3198.67	384.609
K10778	3118	2112	2328	3916	3268	3962	4004	4542	3858	3982	4144	4118	4166	2898	2446	2488	2316	2282	2522	2344	2520	2968	2508	2370	4432	4298	4536	3684	3938	4906	3412	3264	3610	3748	4674	3728	123410	2519.33	529.59	3977.11	333.267	2766	720.259	2538.67	224.605	4299	436.086	3739.33	494.696
K05595	2382	2068	1896	4144	3524	3952	3852	4438	3820	3868	3636	3524	3916	2576	2056	2806	2960	2396	2730	2644	3246	4008	2204	1870	5296	5014	5308	4354	4918	5904	3136	2776	2874	3004	3256	3048	123404	2115.33	246.433	3862	295.986	2785	638.227	2783.67	762.356	5132.33	513.587	3015.67	173.742
K00876	3240	2622	2454	2500	2330	3150	2924	3142	3478	2740	3216	3038	4936	4174	3282	4156	4928	3420	2332	2198	2654	2138	1594	1318	4708	4100	4106	6206	4464	6722	3358	3208	3212	3696	4062	3490	123296	2772	413.913	2946.44	364.985	4149.33	708.521	2039	493.36	5051	1130.12	3504.33	329.43
K07657	3706	2804	2828	3448	3114	3986	3536	3982	3650	3440	3798	3638	4824	3882	3198	3932	3566	3294	2570	2230	2684	3236	2538	2000	3604	3464	3740	4066	3994	4820	3236	3042	3296	3304	3538	3184	123172	3112.67	513.982	3621.33	279.054	3782.67	590.613	2543	422.777	3948	484.207	3266.67	163.784
K04757	2418	1852	1906	2732	2260	3070	3100	3344	3048	3174	3512	2980	4156	3382	2766	3140	3226	2952	2836	2604	3234	3040	2124	1646	4722	4288	4134	5070	4456	6360	4342	3908	4070	4534	4708	3984	123078	2058.67	312.361	3024.44	360.972	3270.33	484.049	2580.67	597.615	4838.33	815.819	4257.67	322.072
K07006	2046	1572	1714	4796	3950	4784	4786	5854	4270	4866	4946	4816	3834	2804	2288	2610	2416	2656	2256	2048	2546	3546	2732	2366	3664	3392	3772	2878	3818	4434	3618	3252	3140	3544	3676	3292	122982	1777.33	243.264	4785.33	517.056	2768	553.076	2582.33	527.481	3659.67	513.799	3420.33	220.51
K01519	3058	2566	2442	3064	2618	3344	3104	3602	3290	3330	3512	3246	3928	2836	2632	3216	3498	2660	2696	2228	2892	3200	2402	2002	4270	4072	4230	4964	4472	6014	3960	3562	3564	4112	4674	3658	122918	2688.67	325.806	3234.44	287.784	3128.33	516.71	2570	443.683	4670.33	727.073	3921.67	431.395
K07175	3000	2494	2298	1962	1936	2636	2378	2604	2416	2508	2598	2794	4182	3080	2820	3114	3564	2516	2582	2092	2564	3642	2382	1848	4778	4418	4852	5268	5096	6018	5052	4422	4394	5266	5130	4172	122876	2597.33	362.228	2425.78	296.925	3212.67	588.202	2518.33	619.429	5071.67	547.076	4739.33	462.511
K09969	3062	2290	2342	4286	3730	4556	4420	5176	4156	4510	4520	4292	4836	3484	2608	3096	2342	2222	2692	2216	2676	3474	2750	2392	4096	3966	3832	2910	3422	4232	3124	2800	2730	3240	3376	2940	122796	2564.67	431.487	4405.11	385.077	3098	974.542	2700	431.587	3743	493.621	3035	254.363
K01556	4780	3296	3560	3026	2372	2890	2854	3296	2816	3116	3356	3038	5484	3852	3506	3900	3910	2920	2432	2186	2752	3360	2746	2596	3662	3352	3414	4294	4266	5178	3420	3098	3424	3488	3746	3274	122660	3878.67	791.66	2973.78	292.702	3928.67	851.136	2678.67	396.112	4027.67	695.389	3408.33	216.841
K03547	2652	1994	2196	2894	2820	3328	3322	3470	3600	3260	3684	3204	3604	3302	2638	3074	2946	2952	2446	2168	2782	2926	1888	1790	4216	3904	3888	4766	4236	5868	4342	4002	3958	4602	5600	4248	122570	2280.67	337.072	3286.89	289.855	3086	332.681	2333.33	466.072	4479.67	750.974	4458.67	606.694
K07777	3044	2748	2432	3842	3634	4594	4744	4880	5440	4248	5210	4504	5596	4862	3404	4068	3708	3532	2216	2082	2908	1722	1228	1076	3484	3068	2868	2708	2294	3830	3020	2926	2712	3290	3272	3218	122412	2741.33	306.054	4566.22	592.394	4195	863.277	1872	679.203	3042	551.057	3073	229.109
K03711	3138	2436	2644	2898	2532	3042	3156	3628	3404	3280	3840	3422	4012	3052	2640	3064	3212	2662	2744	2462	2874	3380	2242	1790	4088	3896	3926	4132	3852	5374	4242	3850	4100	4484	4878	4028	122404	2739.33	360.579	3244.67	393.137	3107	500.208	2582	548.74	4211.33	580.219	4263.67	368.746
K00226	2942	2404	2168	3008	2528	2990	3110	3340	3078	3394	3470	3216	4084	3254	2610	3070	3376	2344	2382	2350	2650	3136	1858	1770	5102	4626	4978	5668	5074	6366	3768	3500	3426	3838	3850	3620	122348	2504.67	396.698	3126	282.099	3123	612.782	2357.67	507.333	5302.33	619.675	3667	179.505
K03470	3086	2384	2574	2870	2672	3456	3276	3682	3328	3172	3608	3372	4100	3054	2434	3050	3264	2816	2426	2128	2746	3052	2216	1994	4532	4088	4190	4806	4520	5590	4044	3516	3438	4200	4684	3766	122134	2681.33	363.1	3270.67	327.794	3119.67	557.387	2427	403.435	4621	540.584	3941.33	467.76
K01194	2014	1600	1750	3654	3120	3426	3576	4188	3180	3902	4230	3670	3430	2754	2500	2290	2514	2288	2378	2112	2688	2880	2162	1892	3866	3658	3728	4128	4232	5390	5006	4680	4314	4984	5486	4462	122132	1788	209.6	3660.67	394.682	2629.33	428.554	2352	373.539	4167	639.356	4822	426.339
K07240	2914	2088	2056	4056	3436	4084	3972	4764	3508	4220	4360	3836	5368	3732	3244	3688	3460	2882	2108	1602	1872	2028	1554	1498	2968	2810	2994	2672	2776	3502	4396	4176	4158	5000	6032	4312	122126	2352.67	486.392	4026.22	411.33	3729	861.743	1777	260.684	2953.67	294.633	4679	731.147
K00919	2912	2204	2258	2988	2546	3060	3004	3684	2880	3452	3702	3320	3682	2738	2194	2646	2910	2334	2524	2186	2612	2954	2328	1780	4444	4136	4570	4930	4770	5906	4382	4032	3998	4604	5314	4070	122054	2458	394.102	3181.78	386.37	2750.67	526.759	2397.33	400.643	4792.67	610.122	4400	506.609
K00065	2972	2242	2456	3914	3298	4006	4068	4506	4080	4304	4272	4214	4274	3132	2608	2472	2186	2416	2512	1938	2528	2844	2082	1856	4564	4304	4688	4276	4636	5696	3128	2988	2834	3258	3404	3098	122054	2556.67	375.267	4073.56	341.101	2848	766.548	2293.33	391.995	4694	519.832	3118.33	199.725
K07678	2894	2450	2478	4138	3434	4194	3918	4816	3842	3634	4094	3996	3568	3090	2660	3332	3652	3332	2464	2086	2488	2846	2630	2388	3816	3638	3684	4784	3686	5626	2686	2500	2776	2892	4246	3042	121800	2607.33	248.655	4007.33	390.017	3272.33	359.69	2483.67	253.138	4205.67	820.743	3023.67	626.315
K12251	3068	2444	2254	3450	3042	3674	3948	4114	3616	3750	4048	4102	4586	3620	3102	3484	3144	2764	2530	2128	2890	2582	2366	1866	4216	4020	4002	4188	3944	4994	3322	3228	3088	3422	3480	3264	121740	2588.67	425.847	3749.33	353.447	3450	633.386	2393.67	360.605	4227.33	390.767	3300.67	140.847
K01919	3850	3018	2942	3546	2884	3442	3384	3982	3038	3322	3350	3122	4348	3028	2644	3164	3590	2774	2550	1898	2336	3266	2934	2690	3774	3794	4156	2970	3700	4030	3758	3442	3832	4034	5364	3702	121658	3270	503.73	3341.11	318.986	3258	627.903	2612.33	474.826	3737.33	413.687	4022	684.939
K13444	3242	2492	2706	3000	2612	3164	2960	3484	3182	2998	3060	3226	4924	3810	3616	4312	5234	3544	2312	1892	2420	2868	2208	1716	4126	3580	3722	5922	5324	6414	2900	3086	2550	3000	3206	2832	121644	2813.33	386.349	3076.22	236.857	4240	709.897	2236	407.081	4848	1202.45	2929	228.171
K13590	2722	2162	2260	3864	3368	4018	4162	4476	4136	4602	4670	4616	3470	2844	2664	2806	3352	2932	2458	2002	2260	2554	2344	1760	3820	3374	3688	4290	3378	4916	3480	3326	3292	3596	4480	3486	121628	2381.33	299.067	4212.44	429.262	3011.33	323.582	2229.67	297.906	3911	597.35	3610	440.716
K01619	3166	2664	2602	2334	2278	2686	2832	2996	3132	2950	3246	3000	4306	3224	2700	3634	3824	2876	2378	2046	2712	3464	2186	1604	4222	3732	3890	4976	4232	5560	4418	4018	4008	4616	5150	3944	121606	2810.67	309.285	2828.22	336.628	3427.33	607.69	2398.33	637.908	4435.33	698.014	4359	470.514
K11720	3680	2726	2956	3234	2732	3434	3342	3964	3330	3248	3682	3370	4022	2768	2528	3004	3678	2392	2800	2578	2812	3606	2678	2134	4676	4300	4374	4790	4372	5568	3172	2944	3088	3022	3406	3002	121412	3120.67	497.861	3370.67	334.866	3065.33	651.897	2768	479.867	4680	476.143	3105.67	166.611
K03616	2930	2508	2506	1766	1634	2366	2532	2386	2864	2298	2666	2398	3400	2660	2260	2830	3890	2502	3162	2510	3434	2804	2024	1626	5944	4848	5140	6960	5600	8154	3838	3650	3572	4002	3978	3750	121392	2648	244.221	2323.33	395.45	2923.67	609.466	2593.33	684.295	6107.67	1242.71	3798.33	173.724
K18890	3108	2188	2554	3378	2926	3626	4116	4274	4000	4154	4416	3780	4138	3458	2990	3396	3542	3036	2740	2570	2742	2418	2386	1934	4042	3592	3864	5864	4192	6398	2376	2462	2396	2570	3112	2568	121306	2616.67	463.19	3852.22	476.628	3426.67	415.817	2465	301.261	4658.67	1170.08	2580.67	273.006
K01640	2526	2026	2096	3086	2710	3182	3342	3598	3190	3198	3070	3044	4436	3402	2766	2970	3344	2288	2618	2216	2550	3228	2350	2168	4322	3958	3998	4166	4340	5364	4604	3992	4032	4276	4824	4018	121298	2216	270.74	3157.78	239.083	3201	729.689	2521.67	389.094	4358	517.71	4291	350.227
K18372	2960	2070	2352	3240	2678	3258	3188	3812	3022	3280	3390	3334	3970	2928	2424	2710	2338	2284	2426	2262	2934	3560	2214	1880	5112	5114	5030	4154	5474	5640	3826	3428	3510	3766	4104	3616	121288	2460.67	454.842	3244.67	301.314	2775.67	634.178	2546	604.579	5087.33	515.882	3708.33	245.019
K21134	2316	2200	1950	2594	2416	2866	2978	3416	2878	2820	3032	2792	5988	3874	3108	3860	4238	2542	3834	3038	3262	3502	2836	2522	4556	4286	4238	3132	3892	4638	3572	3358	3400	3924	3830	3378	121066	2155.33	187.044	2865.78	279.915	3935	1178.16	3165.67	470.82	4123.67	552.801	3577	246.306
K01776	2850	2418	2362	2888	2558	3110	3396	3490	3118	3460	3344	3254	4228	3252	2756	3778	3818	3056	2642	1962	2416	3068	2166	1956	3904	3512	3902	4858	4192	5732	3814	3316	3518	3904	5094	3896	120988	2543.33	267.053	3179.78	302.989	3481.33	551.086	2368.33	434.227	4350	811.765	3923.67	619.142
K03548	2942	2346	2204	2964	2512	3144	3230	3558	3084	3134	3220	3194	4176	3258	2540	3710	4226	2990	2518	2186	2282	3342	2744	2324	5260	4706	5040	4860	4732	5576	3078	2936	3006	2894	3854	3120	120890	2497.33	391.583	3115.56	277.333	3483.33	673.313	2566	428.902	5029	338.76	3148	356.018
K02500	3322	2696	2612	3324	2844	3352	3100	3690	3094	3592	3524	3430	4262	3252	2510	3352	3384	3104	2636	2266	2772	3060	2444	2234	3722	3450	3498	3680	3664	4546	4116	3724	3704	4250	4772	3810	120792	2876.67	387.95	3327.78	271.833	3310.67	565.569	2568.67	318.257	3760	399.9	4062.67	411.891
K00767	2222	1972	1788	2904	2618	3032	3018	3428	2862	3056	3464	3224	3594	2488	2198	2852	3292	2516	2530	2298	2686	3820	2420	2032	4708	4374	4560	5228	5190	6066	3984	3542	3806	4296	4822	3788	120678	1994	217.835	3067.33	270.767	2823.33	531.477	2631	623.082	5021	615.229	4039.67	457.484
K09699	3050	2358	2402	2878	2442	3354	3154	3396	3126	3494	3506	3504	4896	3486	2900	3626	2742	2904	2332	2074	2766	3230	2088	1918	3852	3714	3746	3200	3536	4352	4662	4054	4042	4730	4944	4130	120588	2603.33	387.45	3206	357.095	3425.67	802.685	2401.33	502.676	3733.33	379.671	4427	397.463
K06607	2834	2342	2642	2794	2592	3428	3590	3726	3682	3158	3492	3286	3518	2520	2274	2976	2670	2532	2838	2548	3162	3446	1914	1756	4792	4426	5014	5092	4414	6450	3486	3244	3076	3750	3710	3392	120566	2606	247.968	3305.33	394.042	2748.33	441.426	2610.67	674.264	5031.33	751.186	3443	262.404
K02551	2426	1796	1898	2054	1964	2250	1962	2044	2216	1970	2090	2372	4210	2780	2772	2904	2974	2166	2480	2338	2972	4050	1922	1698	4758	4852	4794	4054	4860	5590	5814	5002	4894	5844	6546	5170	120486	2040	338.154	2102.44	145.636	2967.67	672.854	2576.67	847.815	4818	487.191	5545	636.088
K02584	2144	1950	2032	3070	2898	3876	3782	4090	4414	3992	4748	3864	3008	3320	2876	2488	2926	2906	3092	2584	2912	1842	1990	1606	4742	4588	4512	7300	5046	8092	2212	2216	2188	2378	2312	2468	120464	2042	97.3858	3859.33	583.275	2920.67	267.033	2337.67	610.156	5713.33	1566.78	2295.67	111.071
K03972	2610	2228	2246	2524	2122	2698	2710	2774	3016	2574	2830	2780	4340	3246	2670	3318	3456	2820	2438	2382	2612	2932	1872	1280	4662	4744	4786	3662	3916	5062	4842	4510	4448	5236	5552	4480	120378	2361.33	215.54	2669.78	250.363	3308.33	589.247	2252.67	588.673	4472	551.727	4844.67	459.521
K06940	2870	2176	2646	2560	2136	3082	3392	3460	4170	2748	3654	3094	3046	2558	2222	3098	3474	2676	3278	2576	2752	1806	2166	1454	4912	4750	4830	6350	4792	7846	3346	3172	3020	3272	3502	3354	120240	2564	354.192	3144	611.802	2845.67	447.014	2338.67	664.184	5580	1268.56	3277.67	166.38
K00957	2522	2284	2076	3430	2958	3362	3070	4024	2882	3216	3154	3492	4914	3068	2956	3684	3952	2754	1986	1824	2302	2980	2166	1700	3326	3148	3484	3494	3840	4508	4648	4046	4394	5080	5308	4144	120176	2294	223.168	3287.56	345.208	3554.67	807.304	2159.67	457.684	3633.33	485.689	4603.33	508.171
K05364	2016	1758	1544	2948	2748	3378	3336	3456	3304	3400	3240	3386	3340	2776	2374	2384	1768	2546	2180	2076	2644	2964	1972	1708	4430	4600	4656	4062	4468	5288	4848	4370	4550	5358	5894	4392	120162	1772.67	236.342	3244	237.989	2531.33	518.297	2257.33	462.803	4584	402.669	4902	610.237
K14194	3172	2202	2482	2952	2436	2844	3028	3462	3168	3136	3442	2966	5484	3820	3096	4004	3788	2950	2616	2526	2712	5124	2136	1878	3782	3332	3496	3862	4670	5034	3538	3154	3288	3438	3752	3286	120056	2618.67	499.233	3048.22	312.505	3857	902.955	2832	1166.4	4029.33	675.233	3409.33	214.441
K03709	3130	1878	2522	3518	2884	3788	3834	3986	4570	3702	4478	3848	5186	4002	2946	3850	4156	3158	2034	1862	2418	1876	1324	1126	4288	3758	3934	5020	3606	5766	2834	2808	2708	2958	3030	3026	119812	2510	626.086	3845.33	500.059	3883	798.897	1773.33	473.896	4395.33	839.348	2894	130.85
K05794	3864	2670	2762	2580	2256	2676	2732	3318	2642	2788	2956	3260	5264	3108	2794	3706	3540	3130	1440	1304	1690	2090	1700	978	2620	2456	2560	2196	2622	3304	6280	5684	5808	7076	8168	5648	119670	3098.67	664.392	2800.89	334.234	3590.33	882.697	1533.67	382.596	2626.33	368.21	6444	1001.42
K02933	3298	2338	2512	2860	2674	2926	3204	3666	3070	3306	3414	3184	4344	3204	2744	3560	4252	3088	2380	2136	2410	3196	2398	1888	3674	3210	3700	4078	3844	4990	3996	3426	3652	4142	4838	3842	119444	2716	511.48	3144.89	302.361	3532	648.721	2401.33	439.534	3916	598.09	3982.67	489.115
K03615	3014	2832	2724	1668	1646	2016	2134	2294	2366	1976	2188	2040	2450	2328	1910	2578	3558	2296	3488	3008	3338	3452	2866	2272	5962	5864	5792	6968	6038	7392	3864	3520	3524	3284	3248	3368	119266	2856.67	146.565	2036.44	249.928	2520	555.85	3070.67	463.623	6336	672.601	3468	225.793
K16698	2038	1352	1582	3128	2700	3390	3884	4316	3888	3658	4138	3746	3936	2868	2140	2748	2984	2484	2398	2120	2338	3810	1896	1424	5272	5058	5550	4452	4000	5876	3242	3104	2804	3412	4192	3284	119212	1657.33	349.149	3649.78	505.589	2860	607.542	2331	806.024	5034.67	698.615	3339.67	466.223
K05299	2924	2644	2662	3298	2746	3702	3674	3528	4506	3620	4352	3468	4132	3622	2850	3172	2894	2740	3264	2772	3218	2292	2050	1652	4160	4156	4238	4270	4082	5478	2848	2672	2732	2716	3024	2976	119134	2743.33	156.721	3654.89	526.62	3235	541.826	2541.33	652.353	4397.33	533.563	2828	146.162
K05838	2798	2094	2156	2836	2338	2894	2986	3076	2678	2956	2746	2812	4236	3136	2656	3048	2768	2372	2440	2088	2740	3336	2290	1696	4452	4560	4620	3422	3998	4968	4602	4268	4462	4982	4990	4358	118858	2349.33	389.791	2813.56	216.499	3036	649.194	2431.67	564.33	4336.67	546.507	4610.33	311.519
K10117	1550	1654	1412	3274	3258	4270	4340	3990	5020	4010	4178	4996	5210	3308	2820	3304	2448	3096	1912	1962	2170	2670	1188	1052	5118	5340	5342	4138	3846	5658	2594	2354	2480	3002	3092	2738	118794	1538.67	121.397	4148.44	625.711	3364.33	961.381	1825.67	610.358	4907	735.162	2710	291.57
K03525	3350	2608	2596	2632	2392	2786	3084	3178	3158	3112	3214	2978	3810	3084	2574	2984	3476	2616	2400	2060	2546	2980	2096	1724	4254	3758	3924	4778	4180	5606	3928	3974	3996	4156	4914	3862	118768	2851.33	431.9	2948.22	284.887	3090.67	483.652	2301	439.068	4416.67	678.839	4138.33	392.386
K14742	2842	2464	2224	2744	2548	3084	3026	3164	3168	3130	3278	3040	3776	3052	2678	3026	3274	2404	2536	2066	2888	3102	2052	1676	4302	4126	4078	4804	4234	5868	4038	3636	3574	4162	4862	3828	118754	2510	311.557	3020.22	230.433	3035	475.853	2386.67	548.674	4568.67	687.527	4016.67	471.725
K07692	2780	2014	2248	3782	3290	4154	4068	4166	4452	3992	4316	4132	5082	3836	2910	3560	2958	3012	1970	1796	2314	2744	1804	1532	3338	3114	3142	3184	2908	4146	3594	3384	3442	3818	4150	3484	118616	2347.33	392.542	4039.11	338.268	3559.67	834.01	2026.67	435.39	3305.33	434.435	3645.33	290.794
K07284	2534	1902	1984	2476	2276	2864	2764	3068	3022	2646	2940	2596	3776	2796	2396	2704	2110	2346	2512	2266	3110	3250	1960	1510	4496	4594	4442	3818	4566	5312	5036	4368	4408	5036	6172	4480	118536	2140	343.668	2739.11	264.012	2688	588.553	2434.67	668.669	4538	475.894	4916.67	686.265
K03710	2592	2100	2094	3834	3516	4336	4242	4508	4364	4402	4480	4328	5606	4096	3526	4022	3382	3232	1996	1770	2274	2342	1504	1132	3436	3426	3476	3280	3132	4336	2964	2750	2648	3254	3156	2948	118484	2262	285.804	4223.33	330.628	3977.33	869.744	1836.33	465.548	3514.33	422.288	2953.33	230.733
K22905	1844	1570	1426	3932	3472	3960	3930	4468	3942	3594	4218	3880	3194	2714	2084	2816	3152	2514	2396	2030	2662	2944	2032	1512	4864	4840	4862	5150	4858	6530	2972	2696	2650	2938	2886	2948	118480	1613.33	212.342	3932.89	295.491	2745.67	415.579	2262.67	512.309	5184	669.861	2848.33	139.447
K00989	2812	2208	2160	3298	2784	3202	3190	3550	2924	3432	3762	3394	3604	2888	2536	2650	2590	2360	2554	2106	2662	3234	2364	2174	3884	3832	4096	3650	4204	4938	4302	3856	3934	4548	4878	3866	118426	2393.33	363.369	3281.78	301.777	2771.33	442.521	2515.67	411.449	4100.67	454.764	4230.67	420.998
K01958	3988	3308	3106	3632	3356	4120	3572	4494	3874	4038	4078	4276	5032	3494	3042	3964	3618	3880	2244	1662	2070	2700	2712	2278	2726	2662	2886	2252	3236	3044	3270	2882	2984	3188	3696	3054	118418	3467.33	462.084	3937.78	363.407	3838.33	669.87	2277.67	397.571	2801	341.129	3179	288.967
K04564	3124	2492	2762	3358	2852	3504	3384	3900	3312	3650	3838	3726	4708	3272	2958	3552	4120	2846	2326	1942	2250	2728	2550	2044	3962	3396	3588	4316	3850	4792	3204	2916	3018	3366	3776	2974	118356	2792.67	317.114	3502.67	323.388	3576	719.052	2306.67	297.42	3984	506.772	3209	323.641
K07282	3572	2174	2596	3368	2916	3626	3680	4102	3584	4174	4062	3532	4016	3278	2562	2656	2480	2342	2218	1984	2382	3338	2120	1608	4850	4982	4582	4600	4186	5858	2934	2712	2682	2890	2858	2814	118318	2780.67	717.062	3671.56	400.387	2889	640.181	2275	582.797	4843	567.171	2815	99.934
K21029	3024	2218	2318	3442	2814	3524	3622	4298	3738	3706	3752	3442	3934	3086	2340	2848	2846	2564	2882	2270	2602	2770	2414	2038	4330	3982	4032	4094	3822	5278	3440	3278	3076	3416	3656	3414	118310	2520	439.331	3593.11	389.574	2936.33	552.801	2496	317.135	4256.33	527.221	3380	192.379
K03624	2686	2342	2276	3322	2816	3710	3338	3852	3690	3718	3978	3536	4106	3210	2602	3134	3132	2894	2268	2096	2544	2668	1896	1748	3764	3520	3710	4036	3754	4892	3652	3474	3480	4196	4360	3862	118262	2434.67	220.148	3551.11	350.657	3179.67	505.703	2203.33	360.403	3946	491.971	3837.33	373.223
K01893	3208	2680	2694	3088	2484	3076	3120	3310	3414	3118	3458	2846	3894	3454	2872	3252	4304	2878	2788	2580	2760	2808	2516	2192	4270	3908	4054	6046	4926	6488	2626	2682	2544	2530	2730	2608	118206	2860.67	300.881	3101.56	299.219	3442.33	570.366	2607.33	235.714	4948.67	1087.95	2620	77.4597
K03642	3332	2374	2554	3750	3046	3668	3960	4790	3784	3910	4324	3908	3412	2508	2144	2402	2514	2112	2820	2268	2680	2756	2536	2068	4286	3844	3898	3922	3898	5202	3342	3098	2846	3358	3630	3238	118182	2753.33	509.157	3904.44	473.624	2515.33	472.753	2521.33	296.429	4175	528.03	3252	264.941
K01425	1552	1274	1136	3272	2530	2964	3264	3654	2710	2972	3142	3240	3290	2492	1944	2094	1910	1856	2802	2510	3228	3458	2490	2192	5006	4860	5064	3772	4744	5412	4860	4388	4300	4590	5040	4144	118156	1320.67	211.89	3083.11	334.304	2264.33	552.764	2780	482.414	4809.67	556.711	4553.67	343.889
K01613	3436	2652	2692	2570	2354	2844	2938	3412	2948	3106	3146	2886	3284	2466	2318	2902	3424	2468	2686	2242	2604	3174	2688	2218	4924	4466	4706	4878	4894	6106	3404	3074	3234	3454	3978	3222	117798	2926.67	441.549	2911.56	311.847	2810.33	466.369	2602	351.766	4995.67	570.37	3394.33	316.967
K08484	2220	1768	1886	3466	3258	3768	3710	4296	3668	3638	4100	4056	2960	2368	2094	2300	2384	2368	2358	2080	2300	2882	2772	2274	4894	4824	5030	3610	3976	4554	3764	3238	3456	3592	4228	3496	117636	1958	234.444	3773.33	326.585	2412.33	289.354	2444.33	312.716	4481.33	567.206	3629	340.263
K01056	3174	2420	2448	2740	2566	3138	3076	3480	3158	3348	3528	3046	3892	3030	2494	3112	3390	2612	2512	2118	2706	3048	2098	1768	4302	3690	4048	4428	4182	5496	3756	3500	3368	3880	4486	3598	117636	2680.67	427.469	3120	317.912	3088.33	513.998	2375	467.437	4357.67	612.598	3764.67	397.208
K13283	2436	2028	1976	3116	2794	3306	3806	4210	3634	3950	4354	3796	3404	2696	2070	3086	3758	2870	2250	1836	2148	2396	1798	1652	4504	4340	4440	5768	4156	6376	3148	2822	2824	2968	3370	3044	117130	2146.67	251.915	3662.89	509.884	2980.67	586.029	2013.33	292.902	4930.67	912.35	3029.33	209.409
K02377	2486	1974	2048	3248	3006	3476	3340	3884	3668	3670	3818	3510	4284	2966	2656	2970	2990	2672	2528	2296	2706	2694	2062	1588	4240	3988	3860	3928	4088	5378	3644	3280	3292	3760	3762	3352	117112	2169.33	276.726	3513.33	282.383	3089.67	604.73	2312.33	432.377	4247	569.755	3515	232.034
K00540	2576	1734	1938	3522	3030	4002	3646	4062	3804	3670	3992	3784	3830	2916	2470	2448	1770	2438	1920	1928	2726	3164	1580	1434	4464	4104	4344	3092	3974	4684	4038	3638	3756	4136	4358	3856	116828	2082.67	439.246	3723.56	317.173	2645.33	686.378	2125.33	677.652	4110.33	559.357	3963.67	265.141
K01236	1108	1308	1084	3682	3066	3780	3858	4264	3360	4226	4092	3930	3298	2646	2358	2316	2450	2840	2208	2064	2304	2894	1798	1508	4570	4394	4406	4606	4558	5714	3772	3436	3396	4110	4034	3376	116814	1166.67	122.985	3806.44	395.064	2651.33	372.244	2129.33	473.607	4708	500.756	3687.33	331.953
K15510	2912	2208	2224	3902	3550	4376	4114	4492	4060	4398	4524	4550	4764	3662	2964	2952	1900	2956	2006	1848	2330	3014	1744	1516	3714	3726	3770	2716	3616	3918	3030	2688	2864	3194	3608	2974	116784	2448	401.915	4218.44	338.777	3199.67	951.449	2076.33	533.867	3576.67	432.976	3059.67	317.287
K26061	4016	2962	3100	2718	2454	3312	3178	3366	3164	3248	3428	3034	4354	3360	2902	3280	3962	2746	2560	2124	2546	3026	2696	2686	3980	3830	3614	4374	4006	4822	3042	2886	2960	3054	3058	2836	116684	3359.33	572.861	3100.22	320.734	3434	618.182	2606.33	292.896	4104.33	430.948	2972.67	94.9245
K00354	2580	2066	2140	2002	1718	2322	2510	2540	2862	2232	2592	2496	3680	2886	2464	3038	3184	2540	2928	2408	2926	2378	1868	1250	4824	4464	4414	5494	4520	6656	4354	3970	3912	4484	5704	4232	116638	2262	277.87	2363.78	342.281	2965.33	447.746	2293	646.968	5062	878.109	4442.67	655.734
K19577	2618	1818	2050	3262	3026	3692	3566	3926	3000	3850	3828	3848	3902	2844	2570	2764	2436	2528	2474	2480	2830	3150	2502	2180	3980	3720	4068	3364	3982	4612	3436	3172	3298	3704	4754	3344	116578	2162	411.592	3555.33	367.023	2840.67	541.681	2602.67	338.123	3954.33	412.377	3618	584.364
K18244	2756	2198	1986	4188	3600	4022	3832	4526	3408	4654	4300	3962	3064	2638	2192	2534	2182	2636	2016	1854	2408	2428	1922	1614	3142	3262	3256	4258	3402	4632	4026	3482	3746	4376	4504	3490	116496	2313.33	397.745	4054.67	409.795	2541	329.452	2040.33	321.415	3658.67	625.921	3937.33	439.419
K11263	1966	1694	1424	2620	2402	2820	2512	2812	2586	2868	2924	3240	2832	2048	1858	1752	1246	2254	2014	2012	2828	3410	1884	1396	3608	3688	3920	3122	4216	4460	6608	5552	5802	6884	7430	5664	116356	1694.67	271.001	2753.78	253.589	1998.33	530.888	2257.33	728.694	3835.67	474.239	6323.33	764.403
K00819	3316	2584	2692	2652	2326	2814	2644	3272	2884	2718	2864	3038	3360	2862	2326	2778	3268	2698	2712	2376	2892	3520	2292	2146	3656	3392	3492	4842	3904	5752	4054	3736	3716	4222	4556	3600	115956	2864	395.151	2801.33	266.552	2882	382.541	2656.33	505.237	4173	933.185	3980.67	365.909
K00946	2744	2128	2184	2940	2626	2974	2832	3636	2938	3212	3310	3120	3246	2450	1896	2812	2980	2370	2794	2342	2742	2962	2266	2076	4204	4034	4290	4824	4462	5444	3968	3462	3584	4026	4396	3596	115870	2352	340.635	3065.33	295.327	2625.67	484.505	2530.33	349.977	4543	516.785	3838.67	354.418
K19002	1938	1550	1506	3574	3174	3924	4034	4010	4250	3806	3940	3824	4790	3792	2832	3352	3510	3104	2116	1976	2166	2106	1474	1210	4858	4584	4312	4984	3320	5658	2768	2488	2484	2874	2830	2692	115810	1664.67	237.734	3837.33	309.708	3563.33	685.615	1841.33	400.637	4619.33	781.376	2689.33	168.986
K18030	3368	2206	2520	5314	4602	5096	5466	6226	4814	5640	5902	4940	3362	2714	2204	2022	1844	2590	2048	1694	2150	2090	1812	1508	3444	3380	3430	3946	3706	4500	2002	1710	1784	1850	1842	1834	115560	2698	601.102	5333.33	530.076	2456	553.491	1883.67	254.066	3734.33	432.277	1837	96.2975
K02838	3078	2260	2294	2912	2656	3272	2980	3688	3164	3420	3396	3462	4356	3114	2668	3280	3288	2718	2294	2072	2536	3220	2180	1802	3922	3426	3520	4036	3656	5222	3652	3320	3308	3810	4038	3452	115472	2544	462.77	3216.67	321.104	3237.33	610.715	2350.67	490.126	3963.67	658.932	3596.67	291.256
K03390	3422	2804	2844	2244	2146	2870	3082	2892	3602	2562	3474	2834	3802	3456	2734	2702	2548	2324	2924	2442	2762	1866	1978	1472	4876	4408	4586	5590	4378	6862	3122	3028	2920	3518	3236	3118	115428	3023.33	345.834	2856.22	494.542	2927.67	572.815	2240.67	562.047	5116.67	965.153	3157	205.97
K07667	2880	2292	2310	3400	3142	3924	3962	4062	4504	3720	4406	3850	5202	4384	3184	3732	3316	3540	1666	1524	2074	1726	1298	1232	2838	2678	2718	2540	2182	3378	3968	3564	3510	4370	4376	3938	115390	2494	334.407	3885.56	434.325	3893	766.903	1586.67	308.624	2722.33	392.547	3954.33	374.387
K01968	2612	1976	1952	2998	2610	3072	3220	3544	2886	2984	3108	3008	4210	3312	2732	3074	3100	2442	2300	1974	2488	3302	2632	2158	3370	3364	3580	2674	3600	3874	4648	4294	4280	4610	5188	4200	115376	2180	374.315	3047.78	251.51	3145	605.633	2475.67	467.089	3410.33	406.376	4536.67	368.814
K00748	3372	2510	2582	2934	2518	2864	3392	3596	3156	3368	3658	3386	3740	2676	2214	3130	3578	2558	2606	2032	2300	3168	2420	1970	4218	4130	3960	5594	4464	6304	2828	2600	2750	2782	3084	2908	115350	2821.33	478.248	3208	373.564	2982.67	602.481	2416	438.508	4778.33	948.236	2825.33	162.528
K00219	2888	2064	2044	1850	1608	2098	2110	2258	2256	2100	2120	2302	4072	3026	2458	2942	3154	2370	2650	1994	2312	2658	1884	1732	3550	3406	3622	4654	4242	5590	5288	4714	4716	5638	7984	4886	115240	2332	481.614	2078	221.025	3003.67	611.15	2205	396.478	4177.33	839.514	5537.67	1251.81
K14987	3008	2036	2496	3106	2590	3080	3106	3822	2872	3434	3346	2978	3688	2768	2282	2884	2834	2056	2094	1816	2028	2202	2070	1774	5130	5190	5400	4082	4138	5422	3634	3236	3578	3758	3650	3602	115190	2513.33	486.232	3148.22	353.53	2752	566.713	1997.33	167.459	4893.67	617.902	3576.33	177.901
K13018	2308	1926	1826	3060	2572	3192	3696	4076	3594	3936	4054	3568	3668	2708	2624	2974	3506	2384	2648	2158	2492	2616	2304	1812	4332	4032	3886	6372	4188	6760	2748	2556	2284	2682	2936	2680	115158	2020	254.378	3527.56	502.926	2977.33	511.067	2338.33	318.538	4928.33	1283.18	2647.67	217.294
K07010	2960	2218	2098	3432	2784	3412	3468	3950	3064	3388	3344	3264	4526	3498	2942	3074	3202	2768	2206	1880	2306	3282	2348	2086	3932	3760	3668	3528	3636	4480	3676	3186	3110	3424	3774	3454	115128	2425.33	466.906	3345.11	315.298	3335	633.529	2351.33	486.186	3834	344.323	3437.33	261.181
K03856	3164	2300	2722	3190	2930	3418	3866	3950	3926	4650	5052	4070	4144	3276	2704	2894	2942	2912	2644	2234	2380	2588	2088	1814	3684	3550	3536	4092	3218	4588	2834	2670	2608	2952	2784	2652	115026	2728.67	432.039	3894.67	670.811	3145.33	523.095	2291.33	313.919	3778	487.377	2750	130.525
K03719	3514	2538	2492	2832	2364	3066	2894	3338	2914	3042	2822	3058	4668	3200	2674	3832	3790	3060	2208	1690	2094	3526	2476	2186	3434	3314	3494	3092	3580	4140	3772	3156	3412	4150	5470	3650	114942	2848	577.231	2925.56	263.839	3537.33	709.375	2363.33	623.856	3509	352.411	3935	823.482
K03783	2888	2214	2234	2980	2426	3076	3186	3426	3558	3256	3438	3354	3680	3000	2602	3042	3612	2622	2072	2002	2406	2624	1700	1374	3976	3652	3766	5114	4278	5980	3546	3216	3148	3706	4178	3400	114732	2445.33	383.491	3188.89	339.977	3093	466.498	2029.67	455.191	4461	909.944	3532.33	377.498
K01442	664	726	662	3484	2842	3420	3576	4030	3630	3148	3428	3204	2490	2118	1474	1224	1210	1582	2216	2064	2676	2140	1952	1544	7288	6836	7020	5734	5634	7824	3102	2874	3012	3278	3630	2972	114708	684	36.3868	3418	335.295	1683	515.513	2098.67	368.553	6722.67	871.372	3144.67	274.161
K25588	1742	1630	1424	2414	2116	2784	2916	2894	3202	2752	3046	2920	5018	3740	2890	3604	2834	2494	1956	1894	2554	2396	1066	780	4068	3910	4028	2926	2940	4274	5302	4848	4786	5510	5996	4984	114638	1598.67	161.299	2782.67	330.817	3430	913.349	1774.33	711.633	3691	598.794	5237.67	463.371
K13788	1318	1196	1174	1354	1318	2042	1570	1880	2462	1600	1616	2284	2284	1682	1532	1782	1844	1762	3138	3034	3476	4056	2334	1758	5386	5634	5608	4692	5574	6446	5308	4862	5040	5480	6868	5224	114618	1229.33	77.5715	1791.78	402.314	1814.33	253.959	2966	817.447	5556.67	561.535	5463.67	720.498
K01791	3400	2176	2662	2594	2336	2774	2942	3438	3042	3086	3612	3072	3912	2878	2454	3298	3650	2678	2222	1900	2308	2756	1966	1682	3930	3520	3492	4040	3268	5182	3860	3556	3660	4182	5068	3988	114584	2746	616.308	2988.44	393.653	3145	571.591	2139	377.369	3905.33	689.078	4052.33	545.856
K02113	3202	2422	2474	2560	2332	2838	2776	3178	2696	2906	3044	3004	3684	2606	2198	2916	3170	2248	2554	2182	2810	3194	2372	1804	3834	3722	3896	4194	4112	5372	4236	3564	3730	4096	4844	3708	114478	2699.33	436.098	2814.89	260.465	2803.67	572.097	2486	486.086	4188.33	605.872	4029.67	473.334
K00950	2942	2400	2206	2708	2314	3058	2858	3404	2696	2946	3118	2824	3798	2806	2216	2882	2966	2186	2412	1868	2472	2954	2180	1702	4090	3990	4242	4154	4200	5390	3998	3780	3878	4132	4820	3882	114472	2516	381.466	2880.67	307.138	2809	591.251	2264.67	451.881	4344.33	519.844	4081.67	381.319
K23464	2060	1724	1588	5142	4736	5062	5102	5646	4316	5782	5794	5324	3712	2694	2360	2268	1268	2622	1780	1622	2024	2762	2128	1890	3360	3250	3452	2454	3288	3662	2652	2410	2390	2604	3056	2440	114424	1790.67	242.96	5211.56	491.606	2487.33	788.892	2034.33	398.476	3244.33	414.129	2592	251.425
K03630	2930	2200	2310	2570	2390	2950	2936	3216	3088	2882	3118	2746	4510	3418	2680	3678	4220	2418	2514	2088	2416	2586	2160	1706	4774	4362	4302	4578	4012	5612	3192	2868	2884	3152	3868	3084	114418	2480	393.573	2877.33	268.08	3487.33	826.93	2245	328.718	4606.67	556.027	3174.67	365.589
K04084	3988	3032	3128	1812	1712	1972	2116	2198	2226	1998	2282	2198	3514	2778	2514	3472	4468	2410	2484	2086	2568	2812	2778	2416	4572	4334	4304	5032	4634	5670	3634	3412	3752	3794	4606	3686	114392	3382.67	526.427	2057.11	197.543	3192.67	781.391	2524	266.272	4757.67	518.205	3814	410.34
K07720	2186	1838	1834	2158	2042	2386	2562	2646	2846	2220	2404	2474	3466	2452	2014	3464	4810	2432	2162	1910	2306	2838	2052	1408	5964	5918	5620	7052	5998	7266	2612	2474	2658	2778	4148	2952	114350	1952.67	202.082	2415.33	252.085	3106.33	1023.31	2112.67	470.58	6303	679.857	2937	614.795
K01637	3414	2598	2916	3232	3090	3328	3394	3740	3152	3628	3650	3518	4362	3278	3036	2846	2742	2710	2450	1894	2354	2862	2632	2966	3366	3188	3390	3156	3526	4018	3066	2790	3076	3364	4446	3138	114316	2976	411.296	3414.67	232.68	3162.33	624.482	2526.33	387.947	3440.67	314.202	3313.33	584.401
K03469	3112	2242	2564	2916	2582	3156	3232	3516	3112	3236	3522	3192	4212	3374	2676	3388	3394	2628	2544	2088	2576	2804	2304	2036	4006	3644	3858	4472	3738	5506	3126	2856	2882	3358	3476	2972	114300	2639.33	439.865	3162.67	288.453	3278.67	581.727	2392	301.198	4204	700.957	3111.67	257.388
K18889	3026	1768	2496	3108	2820	3530	3780	3892	3876	3738	4168	3478	3966	3344	2864	3160	3442	2978	2742	2322	2538	2696	2184	1800	3658	3502	3366	5676	3966	5816	2400	2248	2156	2376	2866	2392	114138	2430	631.592	3598.89	419.187	3292.33	394.635	2380.33	356.102	4330.67	1115.25	2406.33	245.029
K00368	3304	2314	2456	5326	4502	4996	5142	5498	4570	5322	5600	4674	5158	4118	3310	3698	2894	3608	1342	1120	1340	1612	3152	3672	1792	1670	1768	1390	1446	1794	2672	2556	2296	2630	2696	2488	113926	2691.33	535.314	5070	408.232	3797.67	781.468	2039.67	1086.9	1643.33	181.203	2556.33	148.832
K02118	3000	2474	2296	2454	2006	2300	2610	2498	2494	2726	2714	2708	3816	2998	2430	3422	3564	2562	2484	2252	2630	2454	2136	1550	4528	4330	4460	4688	3928	5086	4190	3814	3754	4200	4376	3712	113644	2590	366.055	2501.11	234.099	3132	561.113	2251	385.685	4503.33	383.964	4007.67	281.133
K01042	2936	1952	2226	3368	3028	3222	3692	3796	3850	3956	4402	3720	4242	3478	2908	2768	2660	2598	2574	2212	2644	2298	1930	1604	4154	3728	3910	4730	3958	5946	2526	2266	2338	2620	2636	2576	113452	2371.33	507.844	3670.44	414.269	3109	638.632	2210.33	393.506	4404.33	830.237	2493.67	154.989
K11068	2844	2182	2112	2854	2338	2866	2716	2992	3020	2728	2914	2838	3880	2822	2190	2842	2900	2402	2074	1884	2426	3288	1884	1396	3932	3600	4140	3394	4282	4350	4636	4110	4226	4710	5648	4008	113428	2379.33	403.932	2807.33	203.769	2839.33	583.073	2158.67	645.999	3949.67	384.261	4556.33	605.095
K15923	2334	3168	2258	2406	2114	2984	2844	3478	3160	3210	3214	3176	4716	3572	2916	3922	5040	2950	1880	1816	2422	2276	1322	1140	3952	3552	3610	6570	5432	6644	2882	2300	2426	2472	2542	2530	113230	2586.67	504.882	2954	435.651	3852.67	886.661	1809.33	506.691	4960	1447.19	2525.33	195.447
K00891	2554	2182	2106	2684	2422	3062	3086	3468	3304	2812	3246	2980	3380	2504	2280	2656	3002	2396	2232	2100	2594	3274	2204	1932	3960	3518	3686	4200	3840	5084	4196	3662	3792	4230	4822	3764	113214	2280.67	239.744	3007.11	326.425	2703	415.384	2389.33	485.076	4048	558.454	4077.67	434.514
K01785	2426	1954	1896	3068	2550	3522	3222	3936	3486	3228	3324	3684	3656	2516	2104	2532	2766	2298	1878	1938	2438	3346	1456	1424	3952	3728	4016	4640	4608	5696	3592	3328	3396	3812	4260	3188	112864	2092	290.703	3335.56	395.699	2645.33	543.923	2080	722.717	4440	717.025	3596	391.371
K03752	3010	2176	2300	2514	2230	3002	2842	3140	2906	2846	3066	3032	3802	2898	2314	3058	3424	2398	2238	1952	2484	2544	2024	1378	3730	3622	3848	4238	3598	5130	4354	3748	3872	4450	4884	3784	112836	2495.33	450.006	2842	293.027	2982.33	577.56	2103.33	427.208	4027.67	588.123	4182	455.428
K22349	7722	6320	5650	4222	3660	4092	4074	4436	4230	4624	4788	4530	5582	4866	3810	3374	2516	2890	1628	1258	1916	1288	1352	1374	1678	1780	1824	958	1266	1184	2324	2172	2258	2334	2458	2268	112706	6564	1057.33	4295.11	340.812	3839.67	1179.9	1469.33	254.984	1448.33	359.839	2302.33	95.7448
[truncated: 12,957 more rows]
[truncated: 2 more columns]
